# Supplementary material for: Terrain Referenced Navigation Using a Multilayer Radial Basis Function-Based Extreme Learning Machine
Source: Hindawi journal article supplement (doi:10.1155/2019/9142694), 2019-07-11
Supplement: f1 [file 9142694.f1.zip]

Archive with 63 entries (57 files):
- 9142694_Supplementary information files/CompareMatchingResults_180909/
- 9142694_Supplementary information files/CompareMatchingResults_180909/ANNTestResult.dat
- 9142694_Supplementary information files/CompareMatchingResults_180909/ANNTrainResult.dat
- 9142694_Supplementary information files/CompareMatchingResults_180909/BLTestResult.dat
- 9142694_Supplementary information files/CompareMatchingResults_180909/BLTrainResult.dat
- 9142694_Supplementary information files/CompareMatchingResults_180909/BSNNTrainResult.dat
- 9142694_Supplementary information files/CompareMatchingResults_180909/CIW_ELMTestResult.dat
- 9142694_Supplementary information files/CompareMatchingResults_180909/CIW_ELMTrainResult.dat
- 9142694_Supplementary information files/CompareMatchingResults_180909/DEM_CIW_ELM_Lambda0.2_RegulationMode3.dat
- 9142694_Supplementary information files/CompareMatchingResults_180909/DEM_CIW_ELM2_Lambda0.2_RegulationMode3.dat
- 9142694_Supplementary information files/CompareMatchingResults_180909/DEM_Cov_ELM_Lambda0.2_RegulationMode3.dat
- 9142694_Supplementary information files/CompareMatchingResults_180909/DEM_ML_RBF_ELM_Lambda0.2_RegulationMode3.dat
- 9142694_Supplementary information files/CompareMatchingResults_180909/ELMTestResult.dat
- 9142694_Supplementary information files/CompareMatchingResults_180909/ELMTrainResult.dat
- 9142694_Supplementary information files/CompareMatchingResults_180909/ML_RBF_ELMTestResult.dat
- 9142694_Supplementary information files/CompareMatchingResults_180909/ML_RBF_ELMTrainResult.dat
- 9142694_Supplementary information files/CompareMatchingResults_180909/ResultsAlanysis.m
- 9142694_Supplementary information files/CompareMatchingResults_180909/SVMRTestResult.dat
- 9142694_Supplementary information files/CompareMatchingResults_180909/SVMRTrainResult.dat
- 9142694_Supplementary information files/CompareMatchingResults_180909/TrainDBData3.dat
- 9142694_Supplementary information files/TrainDB_ML_RBF_ELM_Using AE2_180919/
- 9142694_Supplementary information files/TrainDB_ML_RBF_ELM_Using AE2_180919/DEM_RBFN_ELM_Lambda0.15_RegulationMode3.dat
- 9142694_Supplementary information files/TrainDB_ML_RBF_ELM_Using AE2_180919/DEM_RBFN_ELM_Lambda0.2_RegulationMode3.dat
- 9142694_Supplementary information files/TrainDB_ML_RBF_ELM_Using AE2_180919/DEM_RBFN_ELM_Lambda0.25_RegulationMode3.dat
- 9142694_Supplementary information files/TrainDB_ML_RBF_ELM_Using AE2_180919/ELMResults_180826.m
- 9142694_Supplementary information files/TrainDB_ML_RBF_ELM_Using AE2_180919/Evaluation_CIW_ML_ELM/
- 9142694_Supplementary information files/TrainDB_ML_RBF_ELM_Using AE2_180919/Evaluation_CIW_ML_ELM/CIW_ML_ELM_DEMHeight.m
- 9142694_Supplementary information files/TrainDB_ML_RBF_ELM_Using AE2_180919/Evaluation_CIW_ML_ELM/evaluateFuncApproxRBFN.m
- 9142694_Supplementary information files/TrainDB_ML_RBF_ELM_Using AE2_180919/Evaluation_CIW_ML_ELM/getRBFActivations.m
- 9142694_Supplementary information files/TrainDB_ML_RBF_ELM_Using AE2_180919/Evaluation_CIW_ML_ELM/TestDBData2.dat
- 9142694_Supplementary information files/TrainDB_ML_RBF_ELM_Using AE2_180919/Evaluation_CIW_ML_ELM/TrainDBData2.dat
- 9142694_Supplementary information files/TrainDB_ML_RBF_ELM_Using AE2_180919/Evaluation_CIW_ML_ELM/TrainingParameter.mat
- 9142694_Supplementary information files/TrainDB_ML_RBF_ELM_Using AE2_180919/kMeans/
- 9142694_Supplementary information files/TrainDB_ML_RBF_ELM_Using AE2_180919/kMeans/computeCentroids.m
- 9142694_Supplementary information files/TrainDB_ML_RBF_ELM_Using AE2_180919/kMeans/findClosestCentroids.m
- 9142694_Supplementary information files/TrainDB_ML_RBF_ELM_Using AE2_180919/kMeans/kMeans.m
- 9142694_Supplementary information files/TrainDB_ML_RBF_ELM_Using AE2_180919/kMeans/kMeansInitCentroids.m
- 9142694_Supplementary information files/TrainDB_ML_RBF_ELM_Using AE2_180919/ML_RBF_ELMTestResult.dat
- 9142694_Supplementary information files/TrainDB_ML_RBF_ELM_Using AE2_180919/ML_RBF_ELMTrainResult.dat
- 9142694_Supplementary information files/TrainDB_ML_RBF_ELM_Using AE2_180919/RBFN/
- 9142694_Supplementary information files/TrainDB_ML_RBF_ELM_Using AE2_180919/RBFN/computeRBFBetas.m
- 9142694_Supplementary information files/TrainDB_ML_RBF_ELM_Using AE2_180919/RBFN/costFunctionRBFN.m
- 9142694_Supplementary information files/TrainDB_ML_RBF_ELM_Using AE2_180919/RBFN/evaluateFuncApproxRBFN.m
- 9142694_Supplementary information files/TrainDB_ML_RBF_ELM_Using AE2_180919/RBFN/evaluateRBFN.m
- 9142694_Supplementary information files/TrainDB_ML_RBF_ELM_Using AE2_180919/RBFN/getRBFActivations.m
- 9142694_Supplementary information files/TrainDB_ML_RBF_ELM_Using AE2_180919/RBFN/trainFuncApproxRBFN.m
- 9142694_Supplementary information files/TrainDB_ML_RBF_ELM_Using AE2_180919/RBFN/trainRBFN.m
- 9142694_Supplementary information files/TrainDB_ML_RBF_ELM_Using AE2_180919/runRBFN_DB_Regression.m
- 9142694_Supplementary information files/TrainDB_ML_RBF_ELM_Using AE2_180919/runRBFN_DB_Regression_1M.m
- 9142694_Supplementary information files/TrainDB_ML_RBF_ELM_Using AE2_180919/TestDBData3.dat
- 9142694_Supplementary information files/TrainDB_ML_RBF_ELM_Using AE2_180919/TrainDBData3.dat
- 9142694_Supplementary information files/TrainDB_ML_RBF_ELM_Using AE2_180919/TrainingParameter_ML_RBF_ELM_Wide3.mat
- 9142694_Supplementary information files/TRNSimulationOutput_180913/
- 9142694_Supplementary information files/TRNSimulationOutput_180913/Bilinear_TerrainHeight.mat
- 9142694_Supplementary information files/TRNSimulationOutput_180913/BKF_Trj1802411_BiLinear_Monte100.mat
- 9142694_Supplementary information files/TRNSimulationOutput_180913/BKF_Trj1802411_BiLinear_Monte100_AidedNav.fig
- 9142694_Supplementary information files/TRNSimulationOutput_180913/BKF_Trj1802411_BiLinear_Monte100_TRN.fig
- 9142694_Supplementary information files/TRNSimulationOutput_180913/BKF_Trj1802411_ML_RBF_ELM7_Monte100_AidedNav.fig
- 9142694_Supplementary information files/TRNSimulationOutput_180913/BKF_Trj1802411_ML_RBF_ELM7_Monte100_TRN.fig
- 9142694_Supplementary information files/TRNSimulationOutput_180913/BKF_Trj1802411_MRBF_ELM7_Monte100.mat
- 9142694_Supplementary information files/TRNSimulationOutput_180913/HeightComp.m
- 9142694_Supplementary information files/TRNSimulationOutput_180913/MRBF_ELM_TerrainHeight.mat
- 9142694_Supplementary information files/TRNSimulationOutput_180913/PaperFigure_Result_181031.m
