# Supplementary material for: Terrain Referenced Navigation Using a Multilayer Radial Basis Function-Based Extreme Learning Machine
Source: Hindawi journal article supplement (doi:10.1155/2019/9142694), 2019-07-11
Supplement: f1 [file 9142694.f1.zip › 9142694_Supplementary information files/CompareMatchingResults_180909/ANNTestResult.dat]

127.174444 35.700556 424.982195 
 127.174444 35.700667 425.089584 
 127.174444 35.700778 425.328674 
 127.174556 35.700778 422.572587 
 127.174556 35.700889 424.081619 
 127.174556 35.701000 426.121731 
 127.174556 35.701111 428.333205 
 127.174667 35.701111 423.987800 
 127.174667 35.701222 428.042653 
 127.174667 35.701333 429.990555 
 127.174667 35.701445 430.604111 
 127.174778 35.701445 427.560169 
 127.174778 35.701556 428.490837 
 127.174778 35.701667 427.690451 
 127.174778 35.701778 424.603147 
 127.174889 35.701889 413.789215 
 127.174889 35.702000 411.932446 
 127.174889 35.702111 411.060479 
 127.174889 35.702222 410.742368 
 127.175000 35.702222 408.634996 
 127.175000 35.702333 409.331950 
 127.175000 35.702445 409.788263 
 127.175000 35.702556 409.981524 
 127.175111 35.702556 405.001695 
 127.175111 35.702667 407.018306 
 127.175111 35.702778 408.140508 
 127.175111 35.702889 408.012521 
 127.175222 35.702889 409.545353 
 127.175222 35.703000 409.433975 
 127.175222 35.703111 407.482976 
 127.175222 35.703222 404.426975 
 127.175333 35.703222 407.928119 
 127.175333 35.703333 402.717589 
 127.175333 35.703445 395.851179 
 127.175333 35.703556 389.359944 
 127.175444 35.703556 381.828191 
 127.175444 35.703667 374.525961 
 127.175444 35.703778 370.976913 
 127.175444 35.703889 369.670281 
 127.175556 35.703889 367.739273 
 127.175556 35.704000 367.054360 
 127.175556 35.704111 366.968934 
 127.175556 35.704222 367.122144 
 127.175667 35.704222 365.097959 
 127.175667 35.704333 364.439058 
 127.175667 35.704444 363.435699 
 127.175667 35.704555 362.046494 
 127.175778 35.704555 358.813857 
 127.175778 35.704667 359.429098 
 127.175778 35.704778 359.663497 
 127.175778 35.704889 359.713296 
 127.175889 35.704889 359.005724 
 127.175889 35.705000 358.471199 
 127.175889 35.705111 357.309833 
 127.175889 35.705222 355.710794 
 127.176000 35.705222 344.826001 
 127.176000 35.705333 340.757373 
 127.176000 35.705444 339.086043 
 127.176000 35.705555 339.099684 
 127.176111 35.705555 336.148396 
 127.176111 35.705667 337.252197 
 127.176111 35.705778 339.587856 
 127.176111 35.705889 342.156703 
 127.176222 35.705889 339.306100 
 127.176222 35.706000 341.261466 
 127.176222 35.706111 341.901248 
 127.176222 35.706222 341.259978 
 127.176333 35.706222 334.429653 
 127.176333 35.706333 334.068012 
 127.176333 35.706444 333.572051 
 127.176333 35.706555 333.317446 
 127.176444 35.706555 331.467640 
 127.176444 35.706667 332.242099 
 127.176444 35.706778 332.801274 
 127.176444 35.706889 333.542645 
 127.176556 35.706889 332.533295 
 127.176556 35.707000 333.302887 
 127.176556 35.707111 334.169726 
 127.176556 35.707222 335.381325 
 127.176667 35.707222 341.074221 
 127.176667 35.707333 346.516315 
 127.176667 35.707444 352.266488 
 127.176667 35.707556 357.746308 
 127.176778 35.707556 365.962599 
 127.176778 35.707667 368.047496 
 127.176778 35.707778 368.573823 
 127.176778 35.707889 367.537401 
 127.176889 35.707889 360.784182 
 127.176889 35.708000 356.447665 
 127.176889 35.708111 352.948913 
 127.176889 35.708222 351.204280 
 127.177000 35.708222 348.965387 
 127.177000 35.708333 348.718040 
 127.177000 35.708444 348.791580 
 127.177111 35.708444 345.399683 
 127.177111 35.708556 343.686419 
 127.177111 35.708667 342.147438 
 127.177111 35.708778 341.623325 
 127.177222 35.708778 338.767394 
 127.177222 35.708889 338.826165 
 127.177222 35.709000 339.319094 
 127.177222 35.709111 340.614840 
 127.177333 35.709111 338.506422 
 127.177333 35.709222 339.437901 
 127.177333 35.709333 340.582462 
 127.177333 35.709444 342.334727 
 127.177444 35.709444 339.704136 
 127.177444 35.709556 340.823196 
 127.177444 35.709667 342.914901 
 127.177444 35.709778 345.208781 
 127.177556 35.709778 337.666784 
 127.177556 35.709889 338.190985 
 127.177556 35.710000 338.609232 
 127.177556 35.710111 338.425436 
 127.177667 35.710111 333.973876 
 127.177667 35.710222 332.846440 
 127.177667 35.710333 329.650172 
 127.177667 35.710444 324.673231 
 127.177778 35.710444 331.372088 
 127.177778 35.710556 329.502908 
 127.177778 35.710667 327.224250 
 127.177778 35.710778 324.788434 
 127.177889 35.710778 332.794049 
 127.177889 35.710889 330.378419 
 127.177889 35.711000 325.472420 
 127.178000 35.711111 316.540828 
 127.178000 35.711222 311.653977 
 127.178000 35.711333 309.905334 
 127.178111 35.711333 307.730443 
 127.178111 35.711444 306.804235 
 127.178111 35.711556 306.937731 
 127.178111 35.711667 307.785411 
 127.178222 35.711667 298.922628 
 127.178222 35.711778 299.837868 
 127.178222 35.711889 301.181852 
 127.178222 35.712000 301.733528 
 127.178333 35.712000 292.189148 
 127.178333 35.712111 289.697171 
 127.178333 35.712222 286.916506 
 127.178333 35.712333 284.523439 
 127.178444 35.712333 286.283457 
 127.178444 35.712444 285.187912 
 127.178444 35.712556 284.291297 
 127.178444 35.712667 283.214651 
 127.178556 35.712667 283.644415 
 127.178556 35.712778 282.128976 
 127.178556 35.712889 279.157564 
 127.178667 35.712889 272.715664 
 127.178667 35.713000 268.304080 
 127.178667 35.713111 263.078529 
 127.178667 35.713222 258.531014 
 127.178778 35.713222 255.246123 
 127.178778 35.713333 254.186009 
 127.178778 35.713444 253.602580 
 127.178778 35.713556 253.256348 
 127.178889 35.713556 253.328567 
 127.178889 35.713667 253.174852 
 127.178889 35.713778 252.909726 
 127.178889 35.713889 252.458407 
 127.179000 35.713889 252.818534 
 127.179000 35.714000 252.124276 
 127.179000 35.714111 251.452555 
 127.179111 35.714111 252.173172 
 127.179111 35.714222 251.545034 
 127.179111 35.714333 251.216141 
 127.179111 35.714445 251.070736 
 127.179222 35.714445 251.846115 
 127.179222 35.714556 251.587760 
 127.179222 35.714667 251.407565 
 127.179222 35.714778 251.249977 
 127.179333 35.714778 251.505836 
 127.179333 35.714889 251.141672 
 127.179333 35.715000 250.755688 
 127.179444 35.715000 250.099697 
 127.179444 35.715111 249.703377 
 127.179444 35.715222 249.484286 
 127.179444 35.715333 249.416815 
 127.179556 35.715333 249.276151 
 127.179556 35.715445 249.383206 
 127.179556 35.715556 249.746338 
 127.179556 35.715667 250.632154 
 127.179667 35.715667 251.106536 
 127.179667 35.715778 251.983263 
 127.179667 35.715889 252.857612 
 127.179778 35.715889 251.907403 
 127.179778 35.716000 252.212377 
 127.179778 35.716111 252.717090 
 127.179778 35.716222 253.684161 
 127.179889 35.716222 252.898218 
 127.179889 35.716333 254.254648 
 127.179889 35.716444 256.742935 
 127.179889 35.716556 260.242059 
 127.180000 35.716556 256.856540 
 127.180000 35.716667 258.499279 
 127.180000 35.716778 260.538193 
 127.180111 35.716778 256.842308 
 127.180111 35.716889 257.944704 
 127.180111 35.717000 260.098962 
 127.180111 35.717111 263.594303 
 127.180222 35.717111 259.784588 
 127.180222 35.717222 262.937356 
 127.180222 35.717333 266.144834 
 127.180222 35.717444 268.084713 
 127.180333 35.717444 263.686965 
 127.180333 35.717555 264.454953 
 127.180333 35.717667 265.126151 
 127.180444 35.717667 263.536433 
 127.180444 35.717778 264.114757 
 127.180444 35.717889 265.006272 
 127.180444 35.718000 265.960362 
 127.180556 35.718000 265.252576 
 127.180556 35.718111 265.682459 
 127.180556 35.718222 266.045317 
 127.180667 35.718222 265.473804 
 127.180667 35.718333 265.696398 
 127.180667 35.718444 266.378459 
 127.180667 35.718555 268.125983 
 127.180778 35.718555 265.777353 
 127.180778 35.718667 267.040031 
 127.180778 35.718778 268.264128 
 127.180889 35.718778 266.849060 
 127.180889 35.718889 267.158479 
 127.180889 35.719000 267.437029 
 127.180889 35.719111 267.940591 
 127.181000 35.719111 267.208480 
 127.181000 35.719222 267.716110 
 127.181000 35.719333 268.844581 
 127.181111 35.719444 270.582502 
 127.181111 35.719556 271.545010 
 127.181111 35.719667 272.225553 
 127.181222 35.719667 271.330237 
 127.181222 35.719778 271.600306 
 127.181222 35.719889 272.010278 
 127.181333 35.720000 271.535549 
 127.181333 35.720111 272.436422 
 127.181333 35.720222 274.475113 
 127.181444 35.720222 272.217379 
 127.181444 35.720333 275.199555 
 127.181444 35.720444 279.042981 
 127.181444 35.720556 281.550980 
 127.181556 35.720556 276.943871 
 127.181556 35.720667 278.092213 
 127.181556 35.720778 279.109539 
 127.181667 35.720778 275.652352 
 127.181667 35.720889 276.395243 
 127.181667 35.721000 277.727186 
 127.181778 35.721000 276.427184 
 127.181778 35.721111 278.008042 
 127.181778 35.721222 280.570049 
 127.181778 35.721333 283.610885 
 127.181889 35.721333 281.987118 
 127.181889 35.721444 284.476809 
 127.181889 35.721556 286.932990 
 127.182000 35.721556 285.003108 
 127.182000 35.721667 287.543594 
 127.182000 35.721778 289.691432 
 127.182000 35.721889 291.086508 
 127.182111 35.721889 289.224109 
 127.182111 35.722000 290.845410 
 127.182111 35.722111 292.763067 
 127.182222 35.722111 290.407660 
 127.182222 35.722222 293.420940 
 127.182222 35.722333 297.094871 
 127.182222 35.722444 300.020658 
 127.182333 35.722444 296.639304 
 127.182333 35.722556 299.320011 
 127.182333 35.722667 301.155396 
 127.182444 35.722667 298.341986 
 127.182444 35.722778 299.735520 
 127.182444 35.722889 300.931387 
 127.182444 35.723000 302.163934 
 127.182556 35.723000 300.964252 
 127.182556 35.723111 302.279275 
 127.182556 35.723222 304.397008 
 127.182667 35.723222 308.677334 
 127.182667 35.723333 313.074534 
 127.182667 35.723444 316.955452 
 127.182778 35.723444 320.762704 
 127.182778 35.723556 322.211873 
 127.182778 35.723667 322.710616 
 127.182778 35.723778 322.669659 
 127.182889 35.723778 324.272141 
 127.182889 35.723889 324.402609 
 127.182889 35.724000 324.613202 
 127.183000 35.724000 327.802951 
 127.183000 35.724111 328.008690 
 127.183000 35.724222 328.495532 
 127.183111 35.724333 332.464752 
 127.183111 35.724444 332.386814 
 127.183111 35.724556 332.633551 
 127.183222 35.724556 333.679215 
 127.183222 35.724667 333.983107 
 127.183222 35.724778 335.205029 
 127.183333 35.724778 338.188192 
 127.183333 35.724889 340.154715 
 127.183333 35.725000 342.007640 
 127.183333 35.725111 342.961280 
 127.183444 35.725111 345.377665 
 127.183444 35.725222 345.696654 
 127.183444 35.725333 346.427669 
 127.183556 35.725333 361.216780 
 127.183556 35.725444 363.439494 
 127.183556 35.725556 365.231735 
 127.183667 35.725556 369.466335 
 127.183667 35.725667 370.307815 
 127.183667 35.725778 371.267311 
 127.183667 35.725889 372.070398 
 127.183778 35.725889 375.773062 
 127.183778 35.726000 376.893209 
 127.183778 35.726111 378.750728 
 127.183889 35.726111 391.964429 
 127.183889 35.726222 391.200926 
 127.183889 35.726333 391.016100 
 127.184000 35.726333 395.273624 
 127.184000 35.726445 394.873305 
 127.184000 35.726556 395.187295 
 127.184000 35.726667 396.242943 
 127.184111 35.726667 404.916264 
 127.184111 35.726778 405.571653 
 127.184111 35.726889 406.573387 
 127.184222 35.726889 409.835667 
 127.184222 35.727000 410.394497 
 127.184222 35.727111 410.610929 
 127.184333 35.727111 422.603044 
 127.184333 35.727222 423.228276 
 127.184333 35.727333 424.782179 
 127.184444 35.727333 427.448858 
 127.184444 35.727445 428.843667 
 127.184444 35.727556 430.002653 
 127.184444 35.727667 430.646426 
 127.184556 35.727667 432.524363 
 127.184556 35.727778 433.415437 
 127.184556 35.727889 435.239806 
 127.184667 35.727889 443.329788 
 127.184667 35.728000 442.345411 
 127.184667 35.728111 442.224785 
 127.184778 35.728111 448.162662 
 127.184778 35.728222 448.783565 
 127.184778 35.728333 454.779966 
 127.184778 35.728445 465.393514 
 127.184889 35.728445 478.474670 
 127.184889 35.728556 484.722800 
 127.184889 35.728667 489.025925 
 127.185000 35.728667 496.451755 
 127.185000 35.728778 499.323776 
 127.185000 35.728889 501.472418 
 127.185111 35.728889 502.433736 
 127.185111 35.729000 504.710998 
 127.185111 35.729111 507.853595 
 127.185222 35.729111 514.325761 
 127.185222 35.729222 518.948104 
 127.185222 35.729333 525.002821 
 127.185222 35.729444 530.453899 
 127.185333 35.729444 528.584994 
 127.185333 35.729555 533.132012 
 127.185333 35.729667 535.681401 
 127.185444 35.729667 544.467804 
 127.185444 35.729778 544.723642 
 127.185444 35.729889 541.940752 
 127.185556 35.729889 551.974526 
 127.185556 35.730000 547.682359 
 127.185556 35.730111 541.027576 
 127.185667 35.730111 548.104329 
 127.185667 35.730222 538.933604 
 127.185667 35.730333 527.434550 
 127.185667 35.730444 517.587174 
 127.185778 35.730444 525.871618 
 127.185778 35.730555 516.784861 
 127.185778 35.730667 510.295740 
 127.185889 35.730667 520.233686 
 127.185889 35.730778 510.366940 
 127.185889 35.730889 501.789884 
 127.186000 35.730889 498.231997 
 127.186000 35.731000 488.133331 
 127.186000 35.731111 478.870956 
 127.186111 35.731111 482.784265 
 127.186111 35.731222 476.439500 
 127.186111 35.731333 469.510022 
 127.186222 35.731333 476.256803 
 127.186222 35.731444 470.115428 
 127.186222 35.731555 463.327886 
 127.186222 35.731667 456.212379 
 127.186333 35.731667 459.739548 
 127.186333 35.731778 453.060547 
 127.186333 35.731889 445.941408 
 127.186444 35.731889 455.003787 
 127.186444 35.732000 450.845475 
 127.186444 35.732111 448.176955 
 127.186556 35.732111 454.676912 
 127.186556 35.732222 452.495488 
 127.186556 35.732333 451.091375 
 127.186667 35.732333 453.705226 
 127.186667 35.732444 452.243383 
 127.186667 35.732556 451.179344 
 127.186778 35.732556 456.167690 
 127.186778 35.732667 454.548886 
 127.186778 35.732778 453.161731 
 127.186889 35.732889 459.300540 
 127.186889 35.733000 457.953241 
 127.186889 35.733111 457.662657 
 127.187000 35.733111 459.438347 
 127.187000 35.733222 458.942686 
 127.187000 35.733333 459.119882 
 127.187111 35.733333 461.741520 
 127.187111 35.733444 462.771160 
 127.187111 35.733556 467.208223 
 127.187222 35.733556 474.436615 
 127.187222 35.733667 481.307659 
 127.187222 35.733778 489.380367 
 127.187333 35.733778 489.229481 
 127.187333 35.733889 493.617722 
 127.187333 35.734000 496.503931 
 127.187444 35.734000 497.163197 
 127.187444 35.734111 501.664486 
 127.187444 35.734222 508.076462 
 127.187556 35.734222 508.327188 
 127.187556 35.734333 512.530605 
 127.187556 35.734444 513.889264 
 127.187556 35.734556 513.823009 
 127.187667 35.734556 503.292607 
 127.187667 35.734667 501.791721 
 127.187667 35.734778 500.060890 
 127.187778 35.734778 492.225889 
 127.187778 35.734889 490.343628 
 127.187778 35.735000 484.723280 
 127.187889 35.735000 480.389116 
 127.187889 35.735111 469.302774 
 127.187889 35.735222 452.873005 
 127.188000 35.735222 438.063607 
 127.188000 35.735333 424.191232 
 127.188000 35.735444 416.113644 
 127.188111 35.735444 412.689685 
 127.188111 35.735556 409.195685 
 127.188111 35.735667 409.296064 
 127.188222 35.735667 407.455597 
 127.188222 35.735778 409.407550 
 127.188222 35.735889 413.808442 
 127.188333 35.735889 418.238099 
 127.188333 35.736000 423.116471 
 127.188333 35.736111 425.355515 
 127.188333 35.736222 427.332442 
 127.188444 35.736222 424.198608 
 127.188444 35.736333 424.364662 
 127.188444 35.736444 424.965949 
 127.188556 35.736444 412.940409 
 127.188556 35.736556 411.883601 
 127.188556 35.736667 413.327067 
 127.188667 35.736667 408.250603 
 127.188667 35.736778 411.951989 
 127.188667 35.736889 423.356840 
 127.188778 35.736889 425.979603 
 127.188778 35.737000 437.507352 
 127.188778 35.737111 445.070674 
 127.188889 35.737111 440.316729 
 127.188889 35.737222 444.302106 
 127.188889 35.737333 449.785534 
 127.189000 35.737333 441.830862 
 127.189000 35.737444 445.817221 
 127.189000 35.737556 449.634150 
 127.189111 35.737556 443.693679 
 127.189111 35.737667 445.962148 
 127.189111 35.737778 446.702760 
 127.189222 35.737778 445.749694 
 127.189222 35.737889 446.271472 
 127.189222 35.738000 446.836512 
 127.189333 35.738111 439.671875 
 127.189333 35.738222 445.635999 
 127.189333 35.738333 451.286163 
 127.189444 35.738333 431.079547 
 127.189444 35.738444 443.825751 
 127.189444 35.738556 451.679636 
 127.189556 35.738556 432.008242 
 127.189556 35.738667 443.302466 
 127.189556 35.738778 448.988815 
 127.189667 35.738778 437.947006 
 127.189667 35.738889 443.690264 
 127.189667 35.739000 446.338432 
 127.189778 35.739000 438.838810 
 127.189778 35.739111 442.742364 
 127.189778 35.739222 446.481318 
 127.189889 35.739222 434.122662 
 127.189889 35.739333 437.249990 
 127.189889 35.739445 440.561410 
 127.190000 35.739445 430.891803 
 127.190000 35.739556 432.688168 
 127.190000 35.739667 436.037726 
 127.190111 35.739667 430.962617 
 127.190111 35.739778 439.096225 
 127.190111 35.739889 454.458790 
 127.190222 35.739889 453.997434 
 127.190222 35.740000 469.172700 
 127.190222 35.740111 475.996495 
 127.190333 35.740111 468.186756 
 127.190333 35.740222 473.088484 
 127.190333 35.740333 476.141194 
 127.190444 35.740333 470.628139 
 127.190444 35.740445 478.520015 
 127.190444 35.740556 484.973333 
 127.190556 35.740556 487.157438 
 127.190556 35.740667 491.321781 
 127.190556 35.740778 494.079696 
 127.190556 35.740889 496.732477 
 127.190667 35.740889 492.695700 
 127.190667 35.741000 495.545586 
 127.190667 35.741111 500.203862 
 127.190778 35.741111 492.017642 
 127.190778 35.741222 498.074510 
 127.190778 35.741333 503.832379 
 127.190889 35.741333 491.915246 
 127.190889 35.741445 496.906930 
 127.190889 35.741556 500.000080 
 127.191000 35.741556 495.077341 
 127.191000 35.741667 497.760943 
 127.191000 35.741778 500.304737 
 127.191111 35.741778 496.964082 
 127.191111 35.741889 502.888500 
 127.191111 35.742000 507.059769 
 127.191222 35.742000 505.478328 
 127.191222 35.742111 508.680682 
 127.191222 35.742222 509.345931 
 127.191333 35.742222 507.175596 
 127.191333 35.742333 507.162571 
 127.191333 35.742444 503.830519 
 127.191444 35.742444 507.917276 
 127.191444 35.742555 505.074444 
 127.191444 35.742667 498.185404 
 127.191556 35.742667 508.257316 
 127.191556 35.742778 500.833270 
 127.191556 35.742889 491.946313 
 127.191667 35.742889 492.626788 
 127.191667 35.743000 488.041185 
 127.191667 35.743111 485.414872 
 127.191778 35.743111 486.945526 
 127.191778 35.743222 482.976953 
 127.191778 35.743333 475.019061 
 127.191889 35.743333 473.264148 
 127.191889 35.743444 457.804723 
 127.191889 35.743555 447.244955 
 127.192000 35.743555 456.679116 
 127.192000 35.743667 451.045523 
 127.192000 35.743778 447.657630 
 127.192111 35.743778 453.043906 
 127.192111 35.743889 450.872965 
 127.192111 35.744000 445.203065 
 127.192222 35.744000 447.107532 
 127.192222 35.744111 436.682903 
 127.192222 35.744222 429.079620 
 127.192333 35.744222 438.920662 
 127.192333 35.744333 435.578688 
 127.192333 35.744444 434.299955 
 127.192444 35.744444 438.404472 
 127.192444 35.744556 437.930423 
 127.192444 35.744667 437.860215 
 127.192556 35.744778 441.776942 
 127.192556 35.744889 443.059577 
 127.192556 35.745000 444.865778 
 127.192667 35.745000 458.461880 
 127.192667 35.745111 458.897676 
 127.192667 35.745222 458.773166 
 127.192778 35.745222 461.874661 
 127.192778 35.745333 462.136430 
 127.192778 35.745444 462.686297 
 127.192889 35.745444 463.208546 
 127.192889 35.745556 464.403346 
 127.192889 35.745667 467.477522 
 127.193000 35.745667 466.876442 
 127.193000 35.745778 471.543138 
 127.193000 35.745889 480.610614 
 127.193111 35.745889 472.993892 
 127.193111 35.746000 482.176432 
 127.193111 35.746111 490.327262 
 127.193222 35.746111 463.710411 
 127.193222 35.746222 473.190933 
 127.193222 35.746333 481.970896 
 127.193333 35.746333 456.879621 
 127.193333 35.746444 467.391425 
 127.193333 35.746556 476.602798 
 127.193444 35.746556 449.979094 
 127.193444 35.746667 455.307284 
 127.193444 35.746778 460.837522 
 127.193556 35.746778 441.774623 
 127.193556 35.746889 448.174296 
 127.193556 35.747000 453.856643 
 127.193667 35.747000 445.251467 
 127.193667 35.747111 451.346635 
 127.193667 35.747222 455.541893 
 127.193778 35.747222 451.832455 
 127.193778 35.747333 457.210446 
 127.193778 35.747444 460.311136 
 127.193889 35.747444 456.758740 
 127.193889 35.747556 461.530948 
 127.193889 35.747667 466.110121 
 127.194000 35.747667 466.150806 
 127.194000 35.747778 472.047073 
 127.194000 35.747889 474.812464 
 127.194111 35.747889 468.022344 
 127.194111 35.748000 472.830087 
 127.194111 35.748111 474.960212 
 127.194222 35.748111 467.779210 
 127.194222 35.748222 473.589224 
 127.194222 35.748333 476.321031 
 127.194333 35.748333 481.392141 
 127.194333 35.748444 485.098214 
 127.194333 35.748556 483.693133 
 127.194444 35.748556 486.920185 
 127.194444 35.748667 483.748084 
 127.194444 35.748778 475.388676 
 127.194556 35.748778 473.091230 
 127.194556 35.748889 467.692164 
 127.194556 35.749000 462.579367 
 127.194667 35.749000 464.387269 
 127.194667 35.749111 459.438649 
 127.194667 35.749222 447.679178 
 127.194778 35.749333 410.461092 
 127.194778 35.749444 399.251209 
 127.194778 35.749556 393.059234 
 127.194889 35.749556 395.673974 
 127.194889 35.749667 393.248559 
 127.194889 35.749778 388.805458 
 127.195000 35.749778 387.945430 
 127.195000 35.749889 382.949574 
 127.195000 35.750000 375.381436 
 127.195111 35.750000 383.003675 
 127.195111 35.750111 379.395803 
 127.195111 35.750222 375.680685 
 127.195222 35.750222 382.511749 
 127.195222 35.750333 380.357629 
 127.195222 35.750444 378.404113 
 127.195333 35.750444 383.582115 
 127.195333 35.750556 379.911514 
 127.195333 35.750667 375.959039 
 127.195444 35.750667 387.791874 
 127.195444 35.750778 385.640228 
 127.195444 35.750889 380.094540 
 127.195556 35.750889 385.475249 
 127.195556 35.751000 376.757966 
 127.195556 35.751111 366.268526 
 127.195667 35.751111 373.055647 
 127.195667 35.751222 369.961843 
 127.195667 35.751333 366.800350 
 127.195778 35.751333 366.388667 
 127.195778 35.751444 362.143420 
 127.195778 35.751556 352.569107 
 127.195889 35.751556 353.145736 
 127.195889 35.751667 345.061426 
 127.195889 35.751778 328.518702 
 127.196000 35.751778 329.209039 
 127.196000 35.751889 319.243663 
 127.196000 35.752000 314.456989 
 127.196111 35.752000 317.192000 
 127.196111 35.752111 315.862926 
 127.196111 35.752222 314.309614 
 127.196222 35.752222 314.915524 
 127.196222 35.752333 312.920313 
 127.196222 35.752445 311.804416 
 127.196333 35.752445 311.192368 
 127.196333 35.752556 310.532975 
 127.196333 35.752667 309.651564 
 127.196444 35.752667 307.464650 
 127.196444 35.752778 305.990501 
 127.196444 35.752889 304.906706 
 127.196556 35.752889 302.846834 
 127.196556 35.753000 303.300478 
 127.196556 35.753111 303.201921 
 127.196667 35.753111 297.633300 
 127.196667 35.753222 297.492147 
 127.196667 35.753333 294.023344 
 127.196667 35.753445 287.171533 
 127.196778 35.753445 274.385931 
 127.196778 35.753556 270.349614 
 127.196778 35.753667 266.938550 
 127.196889 35.753667 258.451050 
 127.196889 35.753778 256.729239 
 127.196889 35.753889 256.062387 
 127.197000 35.753889 249.732973 
 127.197000 35.754000 250.455202 
 127.197000 35.754111 250.422916 
 127.197111 35.754111 242.043481 
 127.197111 35.754222 238.599338 
 127.197111 35.754333 235.648709 
 127.197222 35.754333 225.243373 
 127.197222 35.754444 224.489198 
 127.197222 35.754555 224.607675 
 127.197333 35.754555 220.327076 
 127.197333 35.754667 219.355137 
 127.197333 35.754778 217.138641 
 127.197444 35.754778 211.655681 
 127.197444 35.754889 206.188668 
 127.197444 35.755000 202.128917 
 127.197556 35.755000 199.238264 
 127.197556 35.755111 197.817597 
 127.197556 35.755222 196.834542 
 127.197667 35.755222 198.640096 
 127.197667 35.755333 197.367808 
 127.197667 35.755444 195.826191 
 127.197778 35.755444 203.043215 
 127.197778 35.755555 202.206928 
 127.197778 35.755667 201.674233 
 127.197889 35.755667 204.887855 
 127.197889 35.755778 203.937718 
 127.197889 35.755889 203.002437 
 127.198000 35.755889 206.682470 
 127.198000 35.756000 206.567330 
 127.198000 35.756111 206.947197 
 127.198111 35.756111 217.808570 
 127.198111 35.756222 217.606582 
 127.198111 35.756333 216.105011 
 127.198222 35.756333 220.640565 
 127.198222 35.756444 220.515225 
 127.198222 35.756555 220.810555 
 127.198333 35.756555 225.304095 
 127.198333 35.756667 226.148377 
 127.198333 35.756778 226.693350 
 127.198444 35.756778 231.132584 
 127.198444 35.756889 229.703151 
 127.198444 35.757000 228.596764 
 127.198556 35.757000 239.384588 
 127.198556 35.757111 239.994190 
 127.198556 35.757222 240.588817 
 127.198667 35.757333 247.699649 
 127.198667 35.757444 246.408709 
 127.198667 35.757556 243.339839 
 127.198778 35.757556 246.444105 
 127.198778 35.757667 243.080623 
 127.198778 35.757778 237.108652 
 127.198889 35.757778 222.154405 
 127.198889 35.757889 213.790614 
 127.198889 35.758000 205.050985 
 127.199000 35.758000 202.517381 
 127.199000 35.758111 196.958624 
 127.199000 35.758222 188.546636 
 127.199111 35.758222 189.877116 
 127.199111 35.758333 181.325940 
 127.199111 35.758444 176.751044 
 127.199222 35.758444 179.642906 
 127.199222 35.758556 172.913063 
 127.199222 35.758667 168.579569 
 127.199333 35.758667 171.467025 
 127.199333 35.758778 165.237181 
 127.199333 35.758889 161.173075 
 127.199444 35.758889 163.815838 
 127.199444 35.759000 157.103674 
 127.199444 35.759111 153.530684 
 127.199556 35.759111 161.526570 
 127.199556 35.759222 155.097327 
 127.199556 35.759333 147.630214 
 127.199667 35.759333 156.087123 
 127.199667 35.759444 146.985577 
 127.199667 35.759556 139.899095 
 127.199778 35.759556 148.007512 
 127.199778 35.759667 136.849946 
 127.199778 35.759778 129.940313 
 127.199889 35.759778 133.412377 
 127.199889 35.759889 130.351623 
 127.199889 35.760000 128.700851 
 127.200000 35.760000 132.367121 
 127.200000 35.760111 131.368409 
 127.200000 35.760222 129.878082 
 127.200111 35.760222 127.987381 
 127.200111 35.760333 123.976371 
 127.200111 35.760444 120.910136 
 127.200222 35.760556 119.452682 
 127.200222 35.760667 118.321035 
 127.200222 35.760778 116.669245 
 127.200333 35.760778 115.883385 
 127.200333 35.760889 113.051415 
 127.200333 35.761000 110.841962 
 127.200444 35.761000 112.040665 
 127.200444 35.761111 110.404516 
 127.200444 35.761222 109.846563 
 127.200556 35.761222 111.012038 
 127.200556 35.761333 110.374605 
 127.200556 35.761444 110.745712 
 127.200667 35.761444 109.995843 
 127.200667 35.761556 109.864088 
 127.200667 35.761667 109.796091 
 127.200778 35.761667 108.504618 
 127.200778 35.761778 107.503652 
 127.200778 35.761889 106.855062 
 127.200889 35.761889 107.380360 
 127.200889 35.762000 106.739749 
 127.200889 35.762111 106.788082 
 127.201000 35.762111 107.311401 
 127.201000 35.762222 107.644981 
 127.201000 35.762333 108.560817 
 127.201111 35.762333 105.781710 
 127.201111 35.762444 105.338583 
 127.201111 35.762556 104.907485 
 127.201222 35.762556 103.545542 
 127.201222 35.762667 103.224857 
 127.201222 35.762778 103.101478 
 127.201333 35.762778 102.867699 
 127.201333 35.762889 102.710308 
 127.201333 35.763000 102.546810 
 127.201444 35.763000 101.106951 
 127.201444 35.763111 100.560141 
 127.201444 35.763222 99.822546 
 127.201444 35.763333 98.841781 
 127.201556 35.763333 99.022173 
 127.201556 35.763444 98.072754 
 127.201556 35.763556 97.257395 
 127.201667 35.763556 96.952818 
 127.201667 35.763667 96.308107 
 127.201667 35.763778 95.981754 
 127.201778 35.763778 95.803504 
 127.201778 35.763889 95.549113 
 127.201778 35.764000 95.352983 
 127.201889 35.764000 95.351389 
 127.201889 35.764111 95.138604 
 127.201889 35.764222 94.870201 
 127.202000 35.764222 94.829558 
 127.202000 35.764333 94.466523 
 127.202000 35.764445 93.884811 
 127.202111 35.764445 94.111323 
 127.202111 35.764556 93.308392 
 127.202111 35.764667 92.615315 
 127.202222 35.764667 93.679956 
 127.202222 35.764778 92.777668 
 127.202222 35.764889 92.147286 
 127.202333 35.764889 92.140922 
 127.202333 35.765000 91.373159 
 127.202333 35.765111 91.094789 
 127.202444 35.765111 91.002389 
 127.202444 35.765222 90.909854 
 127.202444 35.765333 91.046087 
 127.202556 35.765445 91.730962 
 127.202556 35.765556 92.656023 
 127.202556 35.765667 93.681568 
 127.202667 35.765667 93.356848 
 127.202667 35.765778 94.261978 
 127.202667 35.765889 95.004949 
 127.202778 35.765889 93.677285 
 127.202778 35.766000 96.231437 
 127.202778 35.766111 100.145547 
 127.202889 35.766111 97.734510 
 127.202889 35.766222 103.749831 
 127.202889 35.766333 107.162723 
 127.203000 35.766333 105.004127 
 127.203000 35.766445 106.596885 
 127.203000 35.766556 106.786118 
 127.203111 35.766556 105.887842 
 127.203111 35.766667 105.917288 
 127.203111 35.766778 104.962580 
 127.203222 35.766778 104.949176 
 127.203222 35.766889 103.356832 
 127.203222 35.767000 99.468851 
 127.203333 35.767000 97.630508 
 127.203333 35.767111 91.994259 
 127.203333 35.767222 87.436470 
 127.203444 35.767222 86.377572 
 127.203444 35.767333 84.918518 
 127.203444 35.767444 84.294275 
 127.203444 35.767555 83.989153 
 127.203556 35.767555 84.099500 
 127.203556 35.767667 83.786894 
 127.203556 35.767778 83.244151 
 127.203667 35.767778 82.953893 
 127.203667 35.767889 82.251236 
 127.203667 35.768000 81.738244 
 127.203778 35.768000 81.916693 
 127.203778 35.768111 81.737083 
 127.203778 35.768222 81.657911 
 127.203889 35.768222 81.541427 
 127.203889 35.768333 81.430248 
 127.203889 35.768444 81.234145 
 127.204000 35.768444 80.405665 
 127.204000 35.768555 80.235580 
 127.204000 35.768667 80.052600 
 127.204111 35.768667 80.004013 
 127.204111 35.768778 79.905663 
 127.204111 35.768889 79.827378 
 127.204222 35.768889 80.074120 
 127.204222 35.769000 79.925178 
 127.204222 35.769111 79.852589 
 127.204333 35.769111 80.022258 
 127.204333 35.769222 79.925272 
 127.204333 35.769333 79.876093 
 127.204333 35.769444 79.831982 
 127.204444 35.769444 79.861882 
 127.204444 35.769555 79.791999 
 127.204444 35.769667 79.705086 
 127.204556 35.769667 79.760476 
 127.204556 35.769778 79.654734 
 127.204556 35.769889 79.590771 
 127.204667 35.769889 79.708444 
 127.204667 35.770000 79.614091 
 127.204667 35.770111 79.508064 
 127.204778 35.770111 79.844409 
 127.204778 35.770222 79.811879 
 127.204778 35.770333 79.786590 
 127.204889 35.770333 79.991710 
 127.204889 35.770444 79.986666 
 127.204889 35.770556 79.979989 
 127.205000 35.770556 80.023399 
 127.205000 35.770667 80.005705 
 127.205000 35.770778 79.994991 
 127.205111 35.770778 79.975858 
 127.205111 35.770889 79.948732 
 127.205111 35.771000 79.924037 
 127.205111 35.771111 79.906293 
 127.205222 35.771111 79.811641 
 127.205222 35.771222 79.816761 
 127.205222 35.771333 79.825310 
 127.205333 35.771333 79.815895 
 127.205333 35.771444 79.814196 
 127.205333 35.771556 79.807889 
 127.205444 35.771556 80.012068 
 127.205444 35.771667 80.001475 
 127.205444 35.771778 79.964101 
 127.205556 35.771778 80.677742 
 127.205556 35.771889 80.649879 
 127.205556 35.772000 80.640943 
 127.205667 35.772000 80.863126 
 127.205667 35.772111 80.860288 
 127.205667 35.772222 80.860020 
 127.205778 35.772222 80.846556 
 127.205778 35.772333 80.839087 
 127.205778 35.772444 80.839098 
 127.205889 35.772444 80.840096 
 127.205889 35.772556 80.851467 
 127.205889 35.772667 80.878572 
 127.205889 35.772778 80.942288 
 127.206000 35.772778 81.126803 
 127.206000 35.772889 81.257302 
 127.206000 35.773000 81.437582 
 127.206111 35.773000 81.309964 
 127.206111 35.773111 81.413749 
 127.206111 35.773222 81.617936 
 127.206222 35.773222 81.471504 
 127.206222 35.773333 81.757282 
 127.206222 35.773444 82.149852 
 127.206333 35.773444 81.777359 
 127.206333 35.773556 82.246896 
 127.206333 35.773667 82.776063 
 127.206444 35.773667 82.661656 
 127.206444 35.773778 84.626189 
 127.206444 35.773889 87.069275 
 127.206556 35.773889 88.550046 
 127.206556 35.774000 90.736989 
 127.206556 35.774111 91.712105 
 127.206667 35.774222 92.835678 
 127.206667 35.774333 93.445144 
 127.206667 35.774444 94.834470 
 127.206778 35.774444 102.674135 
 127.206778 35.774556 107.238736 
 127.206778 35.774667 112.390931 
 127.206889 35.774667 124.840761 
 127.206889 35.774778 125.162300 
 127.206889 35.774889 125.370538 
 127.207000 35.774889 127.187498 
 127.207000 35.775000 126.611765 
 127.207000 35.775111 126.596351 
 127.207111 35.775111 130.292548 
 127.207111 35.775222 131.691800 
 127.207111 35.775333 135.344848 
 127.207222 35.775333 145.831421 
 127.207222 35.775444 148.136545 
 127.207222 35.775556 150.666719 
 127.207333 35.775556 151.952532 
 127.207333 35.775667 155.195689 
 127.207333 35.775778 161.126031 
 127.207333 35.775889 168.257015 
 127.207444 35.775889 179.065167 
 127.207444 35.776000 181.745089 
 127.207444 35.776111 181.399500 
 127.207556 35.776111 184.340955 
 127.207556 35.776222 183.016936 
 127.207556 35.776333 179.598444 
 127.207667 35.776333 184.402069 
 127.207667 35.776444 183.630118 
 127.207667 35.776556 182.805475 
 127.207778 35.776556 182.585448 
 127.207778 35.776667 179.788198 
 127.207778 35.776778 174.660067 
 127.207889 35.776778 163.562972 
 127.207889 35.776889 160.057887 
 127.207889 35.777000 156.864026 
 127.208000 35.777000 158.749775 
 127.208000 35.777111 156.626704 
 127.208000 35.777222 153.026203 
 127.208000 35.777333 148.826106 
 127.208111 35.777333 149.515314 
 127.208111 35.777445 147.554689 
 127.208111 35.777556 147.112340 
 127.208222 35.777556 150.554975 
 127.208222 35.777667 150.975659 
 127.208222 35.777778 153.602739 
 127.208333 35.777778 163.154667 
 127.208333 35.777889 163.348341 
 127.208333 35.778000 163.802524 
 127.208444 35.778000 168.300728 
 127.208444 35.778111 169.051603 
 127.208444 35.778222 172.542780 
 127.208556 35.778222 187.441089 
 127.208556 35.778333 194.139989 
 127.208556 35.778445 199.394843 
 127.208667 35.778556 202.424266 
 127.208667 35.778667 204.162617 
 127.208667 35.778778 205.613615 
 127.208778 35.778778 212.628522 
 127.208778 35.778889 217.382071 
 127.208778 35.779000 221.526527 
 127.208889 35.779000 224.476027 
 127.208889 35.779111 226.417291 
 127.208889 35.779222 226.769323 
 127.209000 35.779222 224.303877 
 127.209000 35.779333 219.433336 
 127.209000 35.779444 210.393879 
 127.209111 35.779444 203.182084 
 127.209111 35.779555 191.343707 
 127.209111 35.779667 184.131538 
 127.209222 35.779667 189.603524 
 127.209222 35.779778 182.855708 
 127.209222 35.779889 178.412848 
 127.209222 35.780000 173.813269 
 127.209333 35.780000 173.122129 
 127.209333 35.780111 167.891893 
 127.209333 35.780222 164.894247 
 127.209444 35.780222 166.084713 
 127.209444 35.780333 164.758452 
 127.209444 35.780444 164.518453 
 127.209556 35.780444 167.544697 
 127.209556 35.780555 168.444677 
 127.209556 35.780667 170.910040 
 127.209667 35.780667 177.534106 
 127.209667 35.780778 179.464728 
 127.209667 35.780889 180.950486 
 127.209778 35.780889 190.827055 
 127.209778 35.781000 191.695980 
 127.209778 35.781111 192.121844 
 127.209889 35.781111 198.730599 
 127.209889 35.781222 199.321406 
 127.209889 35.781333 199.548088 
 127.209889 35.781444 199.091740 
 127.210000 35.781444 205.397483 
 127.210000 35.781555 202.518770 
 127.210000 35.781667 195.856145 
 127.210111 35.781667 205.329571 
 127.210111 35.781778 194.153922 
 127.210111 35.781889 179.427250 
 127.210222 35.781889 192.973561 
 127.210222 35.782000 179.497389 
 127.210222 35.782111 170.392914 
 127.210333 35.782111 180.040779 
 127.210333 35.782222 173.912027 
 127.210333 35.782333 171.785090 
 127.210444 35.782333 174.078749 
 127.210444 35.782444 172.983814 
 127.210444 35.782556 173.296824 
 127.210556 35.782556 175.684753 
 127.210556 35.782667 177.578780 
 127.210556 35.782778 181.628123 
 127.210556 35.782889 187.303221 
 127.210667 35.782889 199.059581 
 127.210667 35.783000 203.047696 
 127.210667 35.783111 205.203469 
 127.210778 35.783111 207.591199 
 127.210778 35.783222 207.901905 
 127.210778 35.783333 208.428662 
 127.210889 35.783333 211.342428 
 127.210889 35.783444 211.545775 
 127.210889 35.783556 213.871423 
 127.211000 35.783556 223.911576 
 127.211000 35.783667 228.531758 
 127.211000 35.783778 235.315135 
 127.211111 35.783778 233.366015 
 127.211111 35.783889 237.919938 
 127.211111 35.784000 240.710281 
 127.211111 35.784111 241.606913 
 127.211222 35.784111 237.079534 
 127.211222 35.784222 236.197025 
 127.211222 35.784333 234.491283 
 127.211333 35.784333 217.117591 
 127.211333 35.784444 214.868377 
 127.211333 35.784556 211.769905 
 127.211444 35.784556 207.203800 
 127.211444 35.784667 203.425884 
 127.211444 35.784778 196.166915 
 127.211556 35.784778 193.885554 
 127.211556 35.784889 190.081905 
 127.211556 35.785000 186.994883 
 127.211667 35.785000 188.036564 
 127.211667 35.785111 185.671900 
 127.211667 35.785222 180.033943 
 127.211667 35.785333 170.551158 
 127.211778 35.785333 164.953683 
 127.211778 35.785444 161.301839 
 127.211778 35.785556 158.092537 
 127.211889 35.785556 155.484520 
 127.211889 35.785667 148.630160 
 127.211889 35.785778 140.266327 
 127.212000 35.785778 135.534678 
 127.212000 35.785889 134.575985 
 127.212000 35.786000 135.298139 
 127.212111 35.786000 138.046265 
 127.212111 35.786111 145.213666 
 127.212111 35.786222 150.616639 
 127.212222 35.786222 149.665537 
 127.212222 35.786333 152.735213 
 127.212222 35.786444 155.020459 
 127.212222 35.786556 160.247493 
 127.212333 35.786556 165.782685 
 127.212333 35.786667 177.727015 
 127.212333 35.786778 184.294415 
 127.212444 35.786778 182.038720 
 127.212444 35.786889 188.297328 
 127.212444 35.787000 192.718607 
 127.212556 35.787000 194.068085 
 127.212556 35.787111 200.795060 
 127.212556 35.787222 203.865186 
 127.212667 35.787222 198.730375 
 127.212667 35.787333 203.184544 
 127.212667 35.787444 207.100987 
 127.212778 35.787444 198.177220 
 127.212778 35.787556 205.804082 
 127.212778 35.787667 214.710791 
 127.212778 35.787778 221.205827 
 127.212889 35.787778 203.663673 
 127.212889 35.787889 207.500045 
 127.212889 35.788000 208.589482 
 127.213000 35.788000 200.248281 
 127.213000 35.788111 202.669137 
 127.213000 35.788222 204.010134 
 127.213111 35.788222 197.265733 
 127.213111 35.788333 200.001514 
 127.213111 35.788444 201.995920 
 127.213222 35.788444 190.380279 
 127.213222 35.788556 194.581813 
 127.213222 35.788667 196.671527 
 127.213333 35.788778 195.831440 
 127.213333 35.788889 197.558930 
 127.213333 35.789000 199.365599 
 127.213444 35.789000 207.839479 
 127.213444 35.789111 214.419933 
 127.213444 35.789222 218.850818 
 127.213556 35.789222 224.896448 
 127.213556 35.789333 226.263160 
 127.213556 35.789445 226.817381 
 127.213667 35.789445 227.487563 
 127.213667 35.789556 230.007681 
 127.213667 35.789667 233.673406 
 127.213778 35.789667 250.389009 
 127.213778 35.789778 256.814213 
 127.213778 35.789889 260.332227 
 127.213778 35.790000 261.316725 
 127.213889 35.790000 263.585184 
 127.213889 35.790111 263.110769 
 127.213889 35.790222 261.258965 
 127.214000 35.790222 258.278984 
 127.214000 35.790333 254.174176 
 127.214000 35.790445 248.880589 
 127.214111 35.790445 237.973034 
 127.214111 35.790556 236.082647 
 127.214111 35.790667 235.586580 
 127.214222 35.790667 232.013796 
 127.214222 35.790778 232.033469 
 127.214222 35.790889 232.588493 
 127.214333 35.790889 230.170580 
 127.214333 35.791000 232.992609 
 127.214333 35.791111 235.547761 
 127.214333 35.791222 238.276570 
 127.214444 35.791222 235.146271 
 127.214444 35.791333 236.865546 
 127.214444 35.791445 239.749007 
 127.214556 35.791445 236.741542 
 127.214556 35.791556 242.055541 
 127.214556 35.791667 253.879490 
 127.214667 35.791667 252.679530 
 127.214667 35.791778 265.898535 
 127.214667 35.791889 278.773083 
 127.214778 35.791889 266.016657 
 127.214778 35.792000 271.591000 
 127.214778 35.792111 277.976403 
 127.214778 35.792222 282.815813 
 127.214889 35.792222 268.386771 
 127.214889 35.792333 273.314286 
 127.214889 35.792444 276.987021 
 127.215000 35.792444 255.596900 
 127.215000 35.792555 260.901158 
 127.215000 35.792667 265.877147 
 127.215111 35.792667 251.744892 
 127.215111 35.792778 258.060599 
 127.215111 35.792889 263.357826 
 127.215222 35.792889 253.260795 
 127.215222 35.793000 256.070274 
 127.215222 35.793111 257.669044 
 127.215333 35.793111 248.032263 
 127.215333 35.793222 245.523261 
 127.215333 35.793333 243.151858 
 127.215333 35.793444 241.868304 
 127.215444 35.793444 234.083888 
 127.215444 35.793555 232.688760 
 127.215444 35.793667 232.136064 
 127.215556 35.793667 229.898691 
 127.215556 35.793778 230.345823 
 127.215556 35.793889 232.191787 
 127.215667 35.793889 231.250933 
 127.215667 35.794000 238.456291 
 127.215667 35.794111 245.449973 
 127.215778 35.794111 243.951252 
 127.215778 35.794222 247.786933 
 127.215778 35.794333 249.638245 
 127.215778 35.794444 251.173238 
 127.215889 35.794444 249.590435 
 127.215889 35.794555 251.859136 
 127.215889 35.794667 254.614247 
 127.216000 35.794667 251.938940 
 127.216000 35.794778 253.053555 
 127.216000 35.794889 254.200886 
 127.216111 35.794889 249.954412 
 127.216111 35.795000 251.747057 
 127.216111 35.795111 255.468796 
 127.216222 35.795111 247.851754 
 127.216222 35.795222 256.863398 
 127.216222 35.795333 264.502163 
 127.216333 35.795333 254.146508 
 127.216333 35.795444 262.932917 
 127.216333 35.795556 269.961751 
 127.216333 35.795667 275.050744 
 127.216444 35.795667 281.780550 
 127.216444 35.795778 287.311951 
 127.216444 35.795889 290.544071 
 127.216556 35.795889 290.672144 
 127.216556 35.796000 291.679691 
 127.216556 35.796111 293.327456 
 127.216667 35.796111 294.281103 
 127.216667 35.796222 298.840820 
 127.216667 35.796333 307.783550 
 127.216778 35.796333 321.733610 
 127.216778 35.796444 328.375945 
 127.216778 35.796556 333.104970 
 127.216778 35.796667 336.397278 
 127.216889 35.796667 334.180664 
 127.216889 35.796778 334.267941 
 127.216889 35.796889 334.016831 
 127.217000 35.796889 329.207187 
 127.217000 35.797000 328.533544 
 127.217000 35.797111 327.702166 
 127.217111 35.797111 315.022161 
 127.217111 35.797222 314.440500 
 127.217111 35.797333 314.521352 
 127.217222 35.797333 307.982919 
 127.217222 35.797444 308.870899 
 127.217222 35.797556 311.431105 
 127.217222 35.797667 316.593945 
 127.217333 35.797667 302.782832 
 127.217333 35.797778 306.941422 
 127.217333 35.797889 309.295417 
 127.217444 35.797889 304.814554 
 127.217444 35.798000 306.035201 
 127.217444 35.798111 306.804806 
 127.217556 35.798111 305.409358 
 127.217556 35.798222 306.284510 
 127.217556 35.798333 307.917625 
 127.217667 35.798333 305.717471 
 127.217667 35.798444 308.132559 
 127.217667 35.798556 309.760146 
 127.217778 35.798667 309.092161 
 127.217778 35.798778 310.030056 
 127.217778 35.798889 312.202849 
 127.217889 35.798889 309.205342 
 127.217889 35.799000 310.040749 
 127.217889 35.799111 312.898341 
 127.218000 35.799111 311.195580 
 127.218000 35.799222 316.084032 
 127.218000 35.799333 323.814574 
 127.218111 35.799333 316.952615 
 127.218111 35.799444 319.826688 
 127.218111 35.799556 325.284223 
 127.218222 35.799556 323.087171 
 127.218222 35.799667 334.741354 
 127.218222 35.799778 342.182383 
 127.218222 35.799889 345.058532 
 127.218333 35.799889 343.384583 
 127.218333 35.800000 347.462763 
 127.218333 35.800111 353.879216 
 127.218444 35.800111 359.154964 
 127.218444 35.800222 369.475570 
 127.218444 35.800333 380.114953 
 127.218556 35.800333 369.158186 
 127.218556 35.800444 374.606838 
 127.218556 35.800556 379.594259 
 127.218667 35.800556 370.899900 
 127.218667 35.800667 365.928180 
 127.218667 35.800778 357.577705 
 127.218667 35.800889 351.720554 
 127.218778 35.800889 348.467759 
 127.218778 35.801000 343.647275 
 127.218778 35.801111 342.282120 
 127.218889 35.801111 341.136227 
 127.218889 35.801222 340.999385 
 127.218889 35.801333 342.766258 
 127.219000 35.801333 338.811057 
 127.219000 35.801444 340.682412 
 127.219000 35.801556 345.831917 
 127.219111 35.801556 339.749825 
 127.219111 35.801667 346.395527 
 127.219111 35.801778 362.289277 
 127.219111 35.801889 385.917130 
 127.219222 35.801889 369.987162 
 127.219222 35.802000 389.908111 
 127.219222 35.802111 402.559762 
 127.219333 35.802111 378.836040 
 127.219333 35.802222 386.607628 
 127.219333 35.802333 394.996995 
 127.219444 35.802333 385.110548 
 127.219444 35.802445 395.604986 
 127.219444 35.802556 403.878015 
 127.219556 35.802556 395.539815 
 127.219556 35.802667 403.317354 
 127.219556 35.802778 406.456421 
 127.219556 35.802889 404.977487 
 127.219667 35.802889 391.490626 
 127.219667 35.803000 385.837042 
 127.219667 35.803111 378.381862 
 127.219778 35.803111 373.286509 
 127.219778 35.803222 371.407139 
 127.219778 35.803333 370.343117 
 127.219889 35.803333 372.758197 
 127.219889 35.803445 371.321124 
 127.219889 35.803556 369.510702 
 127.220000 35.803556 373.621847 
 127.220000 35.803667 366.865938 
 127.220000 35.803778 361.829309 
 127.220000 35.803889 358.827736 
 127.220111 35.803889 361.417792 
 127.220111 35.804000 359.281294 
 127.220111 35.804111 356.484819 
 127.220222 35.804111 355.368314 
 127.220222 35.804222 349.416050 
 127.220222 35.804333 345.077833 
 127.220333 35.804333 344.246277 
 127.220333 35.804444 342.730827 
 127.220333 35.804556 342.193944 
 127.220444 35.804556 344.942095 
 127.220444 35.804667 344.101392 
 127.220444 35.804778 343.604922 
 127.220444 35.804889 342.853687 
 127.220556 35.804889 349.307248 
 127.220556 35.805000 346.200540 
 127.220556 35.805111 340.892665 
 127.220667 35.805111 351.439429 
 127.220667 35.805222 343.964574 
 127.220667 35.805333 333.052189 
 127.220778 35.805333 343.496663 
 127.220778 35.805444 341.053843 
 127.220778 35.805555 340.338397 
 127.220889 35.805555 343.431032 
 127.220889 35.805667 343.826291 
 127.220889 35.805778 342.895869 
 127.220889 35.805889 339.659439 
 127.221000 35.805889 343.516069 
 127.221000 35.806000 340.208854 
 127.221000 35.806111 332.144899 
 127.221111 35.806111 329.985641 
 127.221111 35.806222 316.283934 
 127.221111 35.806333 307.201157 
 127.221222 35.806333 311.910239 
 127.221222 35.806444 307.054874 
 127.221222 35.806555 307.289923 
 127.221333 35.806555 318.585098 
 127.221333 35.806667 321.201496 
 127.221333 35.806778 322.357346 
 127.221333 35.806889 321.609458 
 127.221444 35.806889 322.566380 
 127.221444 35.807000 320.108533 
 127.221444 35.807111 312.007236 
 127.221556 35.807111 310.540244 
 127.221556 35.807222 296.991623 
 127.221556 35.807333 282.348189 
 127.221667 35.807333 282.981292 
 127.221667 35.807444 274.400155 
 127.221667 35.807556 271.599155 
 127.221778 35.807556 278.080170 
 127.221778 35.807667 280.088385 
 127.221778 35.807778 285.246588 
 127.221778 35.807889 289.286291 
 127.221889 35.807889 294.853050 
 127.221889 35.808000 298.008792 
 127.221889 35.808111 303.392899 
 127.222000 35.808111 317.174409 
 127.222000 35.808222 319.634747 
 127.222000 35.808333 321.563514 
 127.222111 35.808333 321.899335 
 127.222111 35.808444 324.755133 
 127.222111 35.808556 332.033085 
 127.222222 35.808556 334.520443 
 127.222222 35.808667 348.720506 
 127.222222 35.808778 361.388460 
 127.222222 35.808889 367.460947 
 127.222333 35.808889 372.669262 
 127.222333 35.809000 374.239458 
 127.222333 35.809111 372.005157 
 127.222444 35.809111 375.017049 
 127.222444 35.809222 371.367274 
 127.222444 35.809333 367.594612 
 127.222556 35.809333 370.677342 
 127.222556 35.809444 368.202333 
 127.222556 35.809556 369.043102 
 127.222667 35.809556 378.882047 
 127.222667 35.809667 380.414756 
 127.222667 35.809778 381.815944 
 127.222667 35.809889 382.213267 
 127.222778 35.809889 380.593239 
 127.222778 35.810000 377.333570 
 127.222778 35.810111 368.387871 
 127.222889 35.810111 351.304127 
 127.222889 35.810222 342.260852 
 127.222889 35.810333 338.555021 
 127.223000 35.810333 329.096128 
 127.223000 35.810444 326.404670 
 127.223000 35.810556 325.178075 
 127.223111 35.810556 321.867029 
 127.223111 35.810667 320.181778 
 127.223111 35.810778 316.493682 
 127.223111 35.810889 311.305288 
 127.223222 35.810889 305.995021 
 127.223222 35.811000 304.681003 
 127.223222 35.811111 303.212262 
 127.223333 35.811111 298.583097 
 127.223333 35.811222 294.154695 
 127.223333 35.811333 288.191253 
 127.223444 35.811333 282.683823 
 127.223444 35.811444 281.053466 
 127.223444 35.811556 279.587600 
 127.223556 35.811556 280.222744 
 127.223556 35.811667 276.365316 
 127.223556 35.811778 269.066987 
 127.223667 35.811889 253.205577 
 127.223667 35.812000 249.988614 
 127.223667 35.812111 249.047309 
 127.223778 35.812111 249.370358 
 127.223778 35.812222 248.731767 
 127.223778 35.812333 248.317457 
 127.223889 35.812333 247.597841 
 127.223889 35.812444 245.134458 
 127.223889 35.812556 242.168850 
 127.224000 35.812556 231.983139 
 127.224000 35.812667 229.515319 
 127.224000 35.812778 228.305513 
 127.224111 35.812889 227.310368 
 127.224111 35.813000 226.859806 
 127.224111 35.813111 225.972690 
 127.224222 35.813111 225.519350 
 127.224222 35.813222 224.286346 
 127.224222 35.813333 222.696480 
 127.224333 35.813333 224.559304 
 127.224333 35.813444 223.908746 
 127.224333 35.813556 222.879957 
 127.224444 35.813556 224.431443 
 127.224444 35.813667 222.641973 
 127.224444 35.813778 221.746417 
 127.224556 35.813778 224.005275 
 127.224556 35.813889 223.077715 
 127.224556 35.814000 223.317757 
 127.224556 35.814111 224.203579 
 127.224667 35.814111 231.154416 
 127.224667 35.814222 231.687225 
 127.224667 35.814333 231.860438 
 127.224778 35.814333 234.444680 
 127.224778 35.814445 235.164028 
 127.224778 35.814556 236.244458 
 127.224889 35.814556 244.880918 
 127.224889 35.814667 247.172351 
 127.224889 35.814778 248.886628 
 127.225000 35.814778 253.214282 
 127.225000 35.814889 253.806493 
 127.225000 35.815000 254.248526 
 127.225000 35.815111 253.483053 
 127.225111 35.815111 262.282090 
 127.225111 35.815222 261.449899 
 127.225111 35.815333 257.708451 
 127.225222 35.815333 262.535746 
 127.225222 35.815445 257.381427 
 127.225222 35.815556 251.523762 
 127.225333 35.815556 250.152216 
 127.225333 35.815667 247.339876 
 127.225333 35.815778 245.635205 
 127.225444 35.815778 246.246609 
 127.225444 35.815889 242.928288 
 127.225444 35.816000 238.834569 
 127.225444 35.816111 235.924611 
 127.225556 35.816111 235.230875 
 127.225556 35.816222 233.073774 
 127.225556 35.816333 230.505190 
 127.225667 35.816333 228.667198 
 127.225667 35.816445 225.811321 
 127.225667 35.816556 221.306306 
 127.225778 35.816556 227.493671 
 127.225778 35.816667 225.716377 
 127.225778 35.816778 223.896184 
 127.225889 35.816778 223.288677 
 127.225889 35.816889 222.080854 
 127.225889 35.817000 221.818519 
 127.225889 35.817111 222.285278 
 127.226000 35.817111 223.543274 
 127.226000 35.817222 225.882331 
 127.226000 35.817333 231.973879 
 127.226111 35.817333 244.484457 
 127.226111 35.817444 250.022715 
 127.226111 35.817555 257.309175 
 127.226222 35.817555 258.372949 
 127.226222 35.817667 267.757802 
 127.226222 35.817778 281.413317 
 127.226333 35.817778 289.455585 
 127.226333 35.817889 298.390891 
 127.226333 35.818000 301.081797 
 127.226444 35.818000 303.237833 
 127.226444 35.818111 304.033331 
 127.226444 35.818222 303.119489 
 127.226444 35.818333 299.677006 
 127.226556 35.818333 298.663847 
 127.226556 35.818444 294.921503 
 127.226556 35.818555 288.202389 
 127.226667 35.818555 292.736137 
 127.226667 35.818667 287.233259 
 127.226667 35.818778 277.097411 
 127.226778 35.818778 288.060796 
 127.226778 35.818889 278.325087 
 127.226778 35.819000 264.834037 
 127.226889 35.819000 275.890756 
 127.226889 35.819111 266.176841 
 127.226889 35.819222 255.141531 
 127.226889 35.819333 245.154036 
 127.227000 35.819333 256.810466 
 127.227000 35.819444 246.618027 
 127.227000 35.819555 238.589078 
 127.227111 35.819555 250.104482 
 127.227111 35.819667 243.665056 
 127.227111 35.819778 240.177688 
 127.227222 35.819778 249.955762 
 127.227222 35.819889 248.531504 
 127.227222 35.820000 248.127924 
 127.227333 35.820000 251.757939 
 127.227333 35.820111 252.760659 
 127.227333 35.820222 254.782448 
 127.227444 35.820222 257.525574 
 127.227444 35.820333 261.452809 
 127.227444 35.820444 264.110515 
 127.227444 35.820556 266.076548 
 127.227556 35.820556 264.552066 
 127.227556 35.820667 265.663318 
 127.227556 35.820778 266.944571 
 127.227667 35.820778 267.477898 
 127.227667 35.820889 271.786199 
 127.227667 35.821000 279.687161 
 127.227778 35.821000 294.610626 
 127.227778 35.821111 301.056055 
 127.227778 35.821222 304.574500 
 127.227889 35.821222 305.992080 
 127.227889 35.821333 307.536951 
 127.227889 35.821444 310.427755 
 127.227889 35.821556 317.101501 
 127.228000 35.821556 330.279041 
 127.228000 35.821667 335.948736 
 127.228000 35.821778 340.097386 
 127.228111 35.821778 341.645075 
 127.228111 35.821889 343.009940 
 127.228111 35.822000 345.408816 
 127.228222 35.822000 348.114880 
 127.228222 35.822111 347.740489 
 127.228222 35.822222 347.194251 
 127.228333 35.822222 346.144085 
 127.228333 35.822333 343.452750 
 127.228333 35.822444 339.809777 
 127.228444 35.822444 328.524929 
 127.228444 35.822556 326.141600 
 127.228444 35.822667 323.661501 
 127.228444 35.822778 319.219569 
 127.228556 35.822778 320.413874 
 127.228556 35.822889 317.924908 
 127.228556 35.823000 314.751511 
 127.228667 35.823000 314.064696 
 127.228667 35.823111 310.648529 
 127.228667 35.823222 303.310533 
 127.228778 35.823222 294.934322 
 127.228778 35.823333 288.609294 
 127.228778 35.823444 284.149925 
 127.228889 35.823444 280.165138 
 127.228889 35.823556 277.492632 
 127.228889 35.823667 273.988868 
 127.228889 35.823778 266.948658 
 127.229000 35.823778 263.491246 
 127.229000 35.823889 255.320330 
 127.229000 35.824000 242.482253 
 127.229111 35.824000 238.680200 
 127.229111 35.824111 232.016816 
 127.229111 35.824222 227.929113 
 127.229222 35.824222 227.850957 
 127.229222 35.824333 227.491091 
 127.229222 35.824444 227.868420 
 127.229333 35.824444 232.029891 
 127.229333 35.824556 235.740547 
 127.229333 35.824667 239.748906 
 127.229444 35.824667 247.308392 
 127.229444 35.824778 249.417512 
 127.229444 35.824889 250.372406 
 127.229444 35.825000 250.760845 
 127.229556 35.825000 252.003843 
 127.229556 35.825111 252.378867 
 127.229556 35.825222 252.907216 
 127.229667 35.825222 256.969436 
 127.229667 35.825333 259.526897 
 127.229667 35.825444 265.579114 
 127.229778 35.825444 272.559840 
 127.229778 35.825556 282.118489 
 127.229778 35.825667 290.678246 
 127.229889 35.825667 293.647359 
 127.229889 35.825778 297.316584 
 127.229889 35.825889 298.487794 
 127.230000 35.826000 304.936031 
 127.230000 35.826111 303.624282 
 127.230000 35.826222 299.878429 
 127.230111 35.826222 307.795459 
 127.230111 35.826333 302.918250 
 127.230111 35.826444 292.595456 
 127.230222 35.826444 296.703016 
 127.230222 35.826556 282.707066 
 127.230222 35.826667 271.558047 
 127.230333 35.826667 262.332058 
 127.230333 35.826778 254.114803 
 127.230333 35.826889 249.899370 
 127.230444 35.826889 246.082000 
 127.230444 35.827000 244.665640 
 127.230444 35.827111 243.281328 
 127.230444 35.827222 240.788818 
 127.230556 35.827222 239.237887 
 127.230556 35.827333 237.785647 
 127.230556 35.827445 236.200212 
 127.230667 35.827445 238.949913 
 127.230667 35.827556 240.250934 
 127.230667 35.827667 241.660241 
 127.230778 35.827667 249.458933 
 127.230778 35.827778 250.474362 
 127.230778 35.827889 250.077050 
 127.230889 35.827889 254.094791 
 127.230889 35.828000 254.823846 
 127.230889 35.828111 255.750479 
 127.231000 35.828111 262.739154 
 127.231000 35.828222 264.632384 
 127.231000 35.828333 265.865713 
 127.231000 35.828445 267.271799 
 127.231111 35.828445 267.889693 
 127.231111 35.828556 269.660728 
 127.231111 35.828667 272.837197 
 127.231222 35.828667 276.801139 
 127.231222 35.828778 279.635830 
 127.231222 35.828889 282.421409 
 127.231333 35.828889 282.442759 
 127.231333 35.829000 284.235763 
 127.231333 35.829111 289.508213 
 127.231444 35.829111 302.204841 
 127.231444 35.829222 319.466819 
 127.231444 35.829333 331.704617 
 127.231556 35.829333 335.262710 
 127.231556 35.829444 339.730230 
 127.231556 35.829556 340.849131 
 127.231556 35.829667 341.069267 
 127.231667 35.829667 341.696355 
 127.231667 35.829778 341.308566 
 127.231667 35.829889 339.872677 
 127.231778 35.829889 337.965401 
 127.231778 35.830000 331.451421 
 127.231778 35.830111 321.061041 
 127.231889 35.830111 308.802982 
 127.231889 35.830222 296.161134 
 127.231889 35.830333 289.945226 
 127.232000 35.830333 293.592510 
 127.232000 35.830444 288.735323 
 127.232000 35.830555 285.668036 
 127.232111 35.830667 283.578805 
 127.232111 35.830778 280.172190 
 127.232111 35.830889 278.620992 
 127.232222 35.830889 281.768640 
 127.232222 35.831000 277.974183 
 127.232222 35.831111 273.939766 
 127.232333 35.831111 272.918451 
 127.232333 35.831222 267.094878 
 127.232333 35.831333 264.685471 
 127.232444 35.831333 270.001422 
 127.232444 35.831444 267.250022 
 127.232444 35.831555 266.887162 
 127.232556 35.831555 274.186224 
 127.232556 35.831667 273.549528 
 127.232556 35.831778 273.562215 
 127.232556 35.831889 273.382673 
 127.232667 35.831889 274.622081 
 127.232667 35.832000 274.623689 
 127.232667 35.832111 274.636799 
 127.232778 35.832111 278.526456 
 127.232778 35.832222 277.740530 
 127.232778 35.832333 276.378256 
 127.232889 35.832333 278.517213 
 127.232889 35.832444 272.357254 
 127.232889 35.832556 264.472844 
 127.233000 35.832556 265.942060 
 127.233000 35.832667 256.630757 
 127.233000 35.832778 251.704978 
 127.233111 35.832778 264.619616 
 127.233111 35.832889 261.986596 
 127.233111 35.833000 262.385538 
 127.233111 35.833111 265.974210 
 127.233222 35.833111 268.689642 
 127.233222 35.833222 273.440265 
 127.233222 35.833333 277.295410 
 127.233333 35.833333 279.109624 
 127.233333 35.833444 280.885813 
 127.233333 35.833556 281.558045 
 127.233444 35.833556 285.141542 
 127.233444 35.833667 284.392489 
 127.233444 35.833778 284.028337 
 127.233556 35.833778 286.262551 
 127.233556 35.833889 285.776339 
 127.233556 35.834000 286.033272 
 127.233667 35.834000 292.318609 
 127.233667 35.834111 291.192463 
 127.233667 35.834222 291.206095 
 127.233667 35.834333 291.926161 
 127.233778 35.834333 305.258425 
 127.233778 35.834444 305.767516 
 127.233778 35.834556 306.858593 
 127.233889 35.834556 308.879124 
 127.233889 35.834667 309.281931 
 127.233889 35.834778 311.960380 
 127.234000 35.834778 318.901699 
 127.234000 35.834889 327.833114 
 127.234000 35.835000 338.130271 
 127.234111 35.835000 344.351345 
 127.234111 35.835111 347.077500 
 127.234111 35.835222 348.115710 
 127.234222 35.835222 346.286198 
 127.234222 35.835333 346.273581 
 127.234222 35.835444 345.253874 
 127.234222 35.835556 343.897726 
 127.234333 35.835556 339.155128 
 127.234333 35.835667 338.418996 
 127.234333 35.835778 337.809323 
 127.234444 35.835778 334.880760 
 127.234444 35.835889 334.399685 
 127.234444 35.836000 332.707654 
 127.234556 35.836000 324.364102 
 127.234556 35.836111 325.566977 
 127.234556 35.836222 324.790213 
 127.234667 35.836222 324.401413 
 127.234667 35.836333 322.059790 
 127.234667 35.836444 313.742074 
 127.234778 35.836444 312.548725 
 127.234778 35.836556 300.689741 
 127.234778 35.836667 282.757677 
 127.234778 35.836778 269.784820 
 127.234889 35.836778 263.265868 
 127.234889 35.836889 256.469189 
 127.234889 35.837000 254.759231 
 127.235000 35.837000 254.945712 
 127.235000 35.837111 254.001854 
 127.235000 35.837222 252.773022 
 127.235111 35.837222 249.223340 
 127.235111 35.837333 237.728841 
 127.235111 35.837444 232.787524 
 127.235222 35.837444 227.977588 
 127.235222 35.837556 227.229276 
 127.235222 35.837667 227.506669 
 127.235333 35.837667 227.349941 
 127.235333 35.837778 228.642038 
 127.235333 35.837889 231.699570 
 127.235333 35.838000 235.770871 
 127.235444 35.838000 232.419301 
 127.235444 35.838111 234.111040 
 127.235444 35.838222 234.393046 
 127.235556 35.838222 223.694630 
 127.235556 35.838333 223.451979 
 127.235556 35.838444 222.018712 
 127.235667 35.838444 220.826052 
 127.235667 35.838556 218.958657 
 127.235667 35.838667 213.413891 
 127.235778 35.838667 214.756100 
 127.235778 35.838778 207.334713 
 127.235778 35.838889 197.372906 
 127.235778 35.839000 190.763746 
 127.235889 35.839000 192.052158 
 127.235889 35.839111 186.624933 
 127.235889 35.839222 184.441998 
 127.236000 35.839222 184.348789 
 127.236000 35.839333 182.327788 
 127.236000 35.839445 179.744005 
 127.236111 35.839445 177.277119 
 127.236111 35.839556 171.565689 
 127.236111 35.839667 168.278373 
 127.236222 35.839667 167.618485 
 127.236222 35.839778 167.044443 
 127.236222 35.839889 167.931046 
 127.236333 35.839889 168.560921 
 127.236333 35.840000 171.884440 
 127.236333 35.840111 177.057241 
 127.236333 35.840222 181.143096 
 127.236444 35.840222 173.672306 
 127.236444 35.840333 176.820416 
 127.236444 35.840445 177.546619 
 127.236556 35.840445 164.494298 
 127.236556 35.840556 164.452598 
 127.236556 35.840667 163.171495 
 127.236667 35.840667 160.646240 
 127.236667 35.840778 160.419108 
 127.236667 35.840889 159.953978 
 127.236778 35.840889 160.351271 
 127.236778 35.841000 159.769648 
 127.236778 35.841111 158.211745 
 127.236889 35.841111 155.229232 
 127.236889 35.841222 150.199026 
 127.236889 35.841333 143.301905 
 127.236889 35.841445 137.736261 
 127.237000 35.841445 133.984430 
 127.237000 35.841556 132.110188 
 127.237000 35.841667 130.820660 
 127.237111 35.841667 125.564018 
 127.237111 35.841778 123.443807 
 127.237111 35.841889 122.337973 
 127.237222 35.841889 119.934556 
 127.237222 35.842000 119.599724 
 127.237222 35.842111 119.521119 
 127.237333 35.842111 118.910110 
 127.237333 35.842222 117.829788 
 127.237333 35.842333 115.838081 
 127.237444 35.842333 112.220235 
 127.237444 35.842444 110.463498 
 127.237444 35.842555 109.752165 
 127.237444 35.842667 109.629075 
 127.237556 35.842667 109.128415 
 127.237556 35.842778 109.346843 
 127.237556 35.842889 109.900769 
 127.237667 35.842889 107.047069 
 127.237667 35.843000 107.699759 
 127.237667 35.843111 108.165178 
 127.237778 35.843111 104.071156 
 127.237778 35.843222 104.261668 
 127.237778 35.843333 104.630651 
 127.237889 35.843333 101.370516 
 127.237889 35.843444 101.820058 
 127.237889 35.843555 102.376469 
 127.238000 35.843555 99.038054 
 127.238000 35.843667 98.227230 
 127.238000 35.843778 97.461238 
 127.238000 35.843889 97.159973 
 127.238111 35.843889 94.652998 
 127.238111 35.844000 94.531042 
 127.238111 35.844111 94.507274 
 127.238222 35.844111 93.727937 
 127.238222 35.844222 92.723817 
 127.238222 35.844333 90.836722 
 127.238333 35.844333 87.875833 
 127.238333 35.844444 85.835640 
 127.238333 35.844555 84.817425 
 127.238444 35.844555 84.715052 
 127.238444 35.844667 84.204598 
 127.238444 35.844778 83.838793 
 127.238556 35.844778 83.516141 
 127.238556 35.844889 82.991604 
 127.238556 35.845000 82.549908 
 127.238556 35.845111 82.243974 
 127.238667 35.845111 82.507649 
 127.238667 35.845222 81.996984 
 127.238667 35.845333 81.500802 
 127.238778 35.845333 80.958290 
 127.238778 35.845444 80.360516 
 127.238778 35.845556 80.045009 
 127.238889 35.845556 80.461419 
 127.238889 35.845667 80.088515 
 127.238889 35.845778 79.900265 
 127.239000 35.845778 80.361042 
 127.239000 35.845889 80.002213 
 127.239000 35.846000 79.821896 
 127.239111 35.846000 80.317197 
 127.239111 35.846111 80.022797 
 127.239111 35.846222 79.935904 
 127.239111 35.846333 79.971188 
 127.239222 35.846333 80.339746 
 127.239222 35.846444 80.314095 
 127.239222 35.846556 80.288166 
 127.239333 35.846556 80.261043 
 127.239333 35.846667 80.100927 
 127.239333 35.846778 79.822576 
 127.239444 35.846778 79.566398 
 127.239444 35.846889 79.361570 
 127.239444 35.847000 79.011372 
 127.239556 35.847000 79.294095 
 127.239556 35.847111 79.015217 
 127.239556 35.847222 78.461857 
 127.239667 35.847222 78.554814 
 127.239667 35.847333 78.262646 
 127.239667 35.847444 78.048382 
 127.239667 35.847556 77.797228 
 127.239778 35.847556 78.072615 
 127.239778 35.847667 77.869756 
 127.239778 35.847778 77.523146 
 127.239889 35.847778 77.586680 
 127.239889 35.847889 77.325304 
 127.239889 35.848000 77.194602 
 127.240000 35.848000 77.340789 
 127.240000 35.848111 77.230856 
 127.240000 35.848222 77.062703 
 127.240111 35.848222 77.475692 
 127.240111 35.848333 77.347610 
 127.240111 35.848444 77.058617 
 127.240222 35.848444 77.501652 
 127.240222 35.848556 76.856219 
 127.240222 35.848667 75.749213 
 127.240333 35.848778 75.660149 
 127.240333 35.848889 75.125558 
 127.240333 35.849000 74.934890 
 127.240444 35.849000 75.833795 
 127.240444 35.849111 75.656273 
 127.240444 35.849222 75.554289 
 127.240556 35.849222 76.029444 
 127.240556 35.849333 75.977361 
 127.240556 35.849444 75.976464 
 127.240667 35.849444 77.363160 
 127.240667 35.849556 77.718213 
 127.240667 35.849667 78.831413 
 127.240778 35.849667 82.959369 
 127.240778 35.849778 86.280854 
 127.240778 35.849889 91.105323 
 127.240889 35.850000 95.948195 
 127.240889 35.850111 98.083237 
 127.240889 35.850222 99.633203 
 127.241000 35.850222 100.007934 
 127.241000 35.850333 102.042584 
 127.241000 35.850444 103.382682 
 127.241111 35.850444 103.745059 
 127.241111 35.850556 104.112170 
 127.241111 35.850667 103.304797 
 127.241222 35.850667 104.645634 
 127.241222 35.850778 103.287661 
 127.241222 35.850889 101.620208 
 127.241333 35.850889 103.796689 
 127.241333 35.851000 103.185482 
 127.241333 35.851111 102.216833 
 127.241444 35.851111 104.462653 
 127.241444 35.851222 102.444345 
 127.241444 35.851333 98.989885 
 127.241444 35.851444 95.644884 
 127.241556 35.851444 94.882633 
 127.241556 35.851556 94.055324 
 127.241556 35.851667 94.370172 
 127.241667 35.851667 96.964113 
 127.241667 35.851778 98.867996 
 127.241667 35.851889 101.009761 
 127.241778 35.851889 113.594962 
 127.241778 35.852000 115.755384 
 127.241778 35.852111 116.938207 
 127.241889 35.852111 120.855705 
 127.241889 35.852222 122.059636 
 127.241889 35.852333 122.795861 
 127.242000 35.852333 127.342881 
 127.242000 35.852445 128.529953 
 127.242000 35.852556 128.331223 
 127.242000 35.852667 127.144281 
 127.242111 35.852667 131.126158 
 127.242111 35.852778 131.566161 
 127.242111 35.852889 133.220886 
 127.242222 35.852889 133.542805 
 127.242222 35.853000 134.974600 
 127.242222 35.853111 137.347445 
 127.242333 35.853111 135.495420 
 127.242333 35.853222 138.199882 
 127.242333 35.853333 142.620072 
 127.242444 35.853333 151.501352 
 127.242444 35.853445 154.992504 
 127.242444 35.853556 155.718317 
 127.242556 35.853556 158.887607 
 127.242556 35.853667 158.720635 
 127.242556 35.853778 158.120458 
 127.242556 35.853889 157.330401 
 127.242667 35.853889 161.158061 
 127.242667 35.854000 161.498685 
 127.242667 35.854111 161.833940 
 127.242778 35.854111 162.292337 
 127.242778 35.854222 162.406031 
 127.242778 35.854333 162.622374 
 127.242889 35.854333 162.812238 
 127.242889 35.854445 162.521350 
 127.242889 35.854556 162.164593 
 127.243000 35.854556 162.837890 
 127.243000 35.854667 160.562310 
 127.243000 35.854778 156.874409 
 127.243111 35.854778 151.605584 
 127.243111 35.854889 139.699490 
 127.243111 35.855000 132.405211 
 127.243111 35.855111 129.420301 
 127.243222 35.855111 130.064938 
 127.243222 35.855222 127.938025 
 127.243222 35.855333 124.730754 
 127.243333 35.855333 118.759411 
 127.243333 35.855444 107.277579 
 127.243333 35.855555 97.862379 
 127.243444 35.855555 95.516075 
 127.243444 35.855667 91.386273 
 127.243444 35.855778 90.084340 
 127.243556 35.855778 85.863293 
 127.243556 35.855889 84.552179 
 127.243556 35.856000 82.099303 
 127.243667 35.856000 76.141809 
 127.243667 35.856111 74.117962 
 127.243667 35.856222 71.786383 
 127.243778 35.856333 69.773271 
 127.243778 35.856444 69.028780 
 127.243778 35.856555 68.818884 
 127.243889 35.856555 69.025911 
 127.243889 35.856667 68.235819 
 127.243889 35.856778 67.278423 
 127.244000 35.856778 67.270229 
 127.244000 35.856889 66.061519 
 127.244000 35.857000 65.599523 
 127.244111 35.857000 65.655630 
 127.244111 35.857111 65.039993 
 127.244111 35.857222 64.841023 
 127.244222 35.857222 64.929602 
 127.244222 35.857333 64.835920 
 127.244222 35.857444 64.794535 
 127.244333 35.857444 64.939764 
 127.244333 35.857556 64.756542 
 127.244333 35.857667 64.708745 
 127.244333 35.857778 64.684000 
 127.244444 35.857778 64.733839 
 127.244444 35.857889 64.695922 
 127.244444 35.858000 64.581261 
 127.244556 35.858000 64.627539 
 127.244556 35.858111 64.377859 
 127.244556 35.858222 64.266822 
 127.244667 35.858222 64.727057 
 127.244667 35.858333 64.756556 
 127.244667 35.858444 64.722280 
 127.244778 35.858444 64.880732 
 127.244778 35.858556 64.736425 
 127.244778 35.858667 64.513427 
 127.244889 35.858667 64.550344 
 127.244889 35.858778 64.322406 
 127.244889 35.858889 64.273984 
 127.244889 35.859000 64.411728 
 127.245000 35.859000 64.861042 
 127.245000 35.859111 65.002251 
 127.245000 35.859222 65.085452 
 127.245111 35.859222 64.997989 
 127.245111 35.859333 64.996306 
 127.245111 35.859444 64.988836 
 127.245222 35.859444 64.937770 
 127.245222 35.859556 64.939127 
 127.245222 35.859667 64.946116 
 127.245333 35.859667 64.957432 
 127.245333 35.859778 64.968890 
 127.245333 35.859889 64.976722 
 127.245444 35.859889 64.970922 
 127.245444 35.860000 64.957951 
 127.245444 35.860111 64.940185 
 127.245444 35.860222 64.917112 
 127.245556 35.860222 64.654133 
 127.245556 35.860333 64.575991 
 127.245556 35.860444 64.504919 
 127.245667 35.860444 64.478335 
 127.245667 35.860556 64.428537 
 127.245667 35.860667 64.345626 
 127.245778 35.860667 64.439050 
 127.245778 35.860778 64.343263 
 127.245778 35.860889 64.215194 
 127.245889 35.860889 64.194536 
 127.245889 35.861000 64.091373 
 127.245889 35.861111 64.035507 
 127.246000 35.861111 64.113985 
 127.246000 35.861222 64.062463 
 127.246000 35.861333 64.036302 
 127.246000 35.861444 64.021809 
 127.246111 35.861444 64.245974 
 127.246111 35.861556 64.150010 
 127.246111 35.861667 64.046761 
 127.246222 35.861667 64.255660 
 127.246222 35.861778 64.134936 
 127.246222 35.861889 64.081184 
 127.246333 35.861889 64.326133 
 127.246333 35.862000 64.431600 
 127.246333 35.862111 64.720695 
 127.246444 35.862111 65.424040 
 127.246444 35.862222 65.819098 
 127.246444 35.862333 66.212786 
 127.246556 35.862333 66.117852 
 127.246556 35.862444 66.360841 
 127.246556 35.862556 66.773807 
 127.246667 35.862667 67.194819 
 127.246667 35.862778 68.302733 
 127.246667 35.862889 69.562931 
 127.246778 35.862889 69.346281 
 127.246778 35.863000 69.417637 
 127.246778 35.863111 68.653333 
 127.246889 35.863111 70.027521 
 127.246889 35.863222 69.537536 
 127.246889 35.863333 68.626908 
 127.247000 35.863333 69.811197 
 127.247000 35.863444 69.261854 
 127.247000 35.863556 68.296781 
 127.247111 35.863556 68.128102 
 127.247111 35.863667 67.206104 
 127.247111 35.863778 66.226479 
 127.247222 35.863778 65.654002 
 127.247222 35.863889 64.921571 
 127.247222 35.864000 64.601696 
 127.247222 35.864111 64.599296 
 127.247333 35.864111 64.567041 
 127.247333 35.864222 64.581184 
 127.247333 35.864333 64.906696 
 127.247444 35.864333 65.317729 
 127.247444 35.864445 65.554038 
 127.247444 35.864556 66.193027 
 127.247556 35.864556 67.024266 
 127.247556 35.864667 67.352453 
 127.247556 35.864778 67.950976 
 127.247667 35.864778 67.774893 
 127.247667 35.864889 68.151501 
 127.247667 35.865000 68.777335 
 127.247778 35.865000 68.945866 
 127.247778 35.865111 69.325875 
 127.247778 35.865222 69.685385 
 127.247778 35.865333 69.870024 
 127.247889 35.865333 69.861642 
 127.247889 35.865445 69.863833 
 127.247889 35.865556 69.864724 
 127.248000 35.865556 69.727242 
 127.248000 35.865667 69.722300 
 127.248000 35.865778 69.746255 
 127.248111 35.865778 69.652133 
 127.248111 35.865889 69.681222 
 127.248111 35.866000 69.775813 
 127.248222 35.866000 69.561417 
 127.248222 35.866111 69.772861 
 127.248222 35.866222 70.200832 
 127.248333 35.866222 69.659772 
 127.248333 35.866333 70.258272 
 127.248333 35.866445 70.701659 
 127.248333 35.866556 70.871054 
 127.248444 35.866556 70.559725 
 127.248444 35.866667 70.640523 
 127.248444 35.866778 70.663609 
 127.248556 35.866778 70.523015 
 127.248556 35.866889 70.540901 
 127.248556 35.867000 70.557900 
 127.248667 35.867000 70.196233 
 127.248667 35.867111 70.213777 
 127.248667 35.867222 70.323008 
 127.248778 35.867222 69.934555 
 127.248778 35.867333 70.182284 
 127.248778 35.867444 70.490446 
 127.248889 35.867444 70.417982 
 127.248889 35.867555 70.563867 
 127.248889 35.867667 70.652262 
 127.249000 35.867667 70.578256 
 127.249000 35.867778 70.710913 
 127.249000 35.867889 71.037377 
 127.249000 35.868000 71.725296 
 127.249111 35.868000 72.130129 
 127.249111 35.868111 72.892423 
 127.249111 35.868222 73.284342 
 127.249222 35.868222 72.606075 
 127.249222 35.868333 72.896177 
 127.249222 35.868444 73.226723 
 127.249333 35.868444 72.792970 
 127.249333 35.868555 73.391202 
 127.249333 35.868667 73.808558 
 127.249444 35.868667 73.542253 
 127.249444 35.868778 73.852818 
 127.249444 35.868889 74.045777 
 127.249556 35.868889 73.645945 
 127.249556 35.869000 74.090591 
 127.249556 35.869111 74.335542 
 127.249556 35.869222 74.443288 
 127.249667 35.869222 74.390000 
 127.249667 35.869333 74.536480 
 127.249667 35.869444 74.658176 
 127.249778 35.869444 74.829604 
 127.249778 35.869555 74.976563 
 127.249778 35.869667 75.060549 
 127.249889 35.869667 75.118460 
 127.249889 35.869778 75.157717 
 127.249889 35.869889 75.156223 
 127.250000 35.869889 75.499958 
 127.250000 35.870000 75.433157 
 127.250000 35.870111 75.369869 
 127.250111 35.870111 75.859977 
 127.250111 35.870222 75.721405 
 127.250111 35.870333 75.618084 
 127.250111 35.870444 75.581495 
 127.250222 35.870444 75.871527 
 127.250222 35.870556 75.802747 
 127.250222 35.870667 75.829598 
 127.250333 35.870667 76.101640 
 127.250333 35.870778 76.137549 
 127.250333 35.870889 76.242920 
 127.250444 35.870889 76.137803 
 127.250444 35.871000 76.194434 
 127.250444 35.871111 76.305147 
 127.250556 35.871111 76.312148 
 127.250556 35.871222 76.474413 
 127.250556 35.871333 76.834303 
 127.250667 35.871333 77.040150 
 127.250667 35.871444 77.299638 
 127.250667 35.871556 77.516208 
 127.250778 35.871667 77.552186 
 127.250778 35.871778 77.713353 
 127.250778 35.871889 78.134843 
 127.250889 35.871889 78.416568 
 127.250889 35.872000 79.966580 
 127.250889 35.872111 82.995131 
 127.251000 35.872111 86.644082 
 127.251000 35.872222 91.047862 
 127.251000 35.872333 93.998315 
 127.251111 35.872333 93.901868 
 127.251111 35.872444 96.973814 
 127.251111 35.872556 98.780526 
 127.251222 35.872556 109.221211 
 127.251222 35.872667 111.768415 
 127.251222 35.872778 112.712138 
 127.251333 35.872778 117.145182 
 127.251333 35.872889 117.515378 
 127.251333 35.873000 117.250284 
 127.251333 35.873111 115.785775 
 127.251444 35.873111 122.367664 
 127.251444 35.873222 122.972531 
 127.251444 35.873333 122.629520 
 127.251556 35.873333 126.370091 
 127.251556 35.873444 126.825875 
 127.251556 35.873556 127.252139 
 127.251667 35.873556 129.247399 
 127.251667 35.873667 129.335984 
 127.251667 35.873778 129.293488 
 127.251778 35.873778 130.211316 
 127.251778 35.873889 129.828567 
 127.251778 35.874000 129.825659 
 127.251889 35.874000 128.348935 
 127.251889 35.874111 128.867653 
 127.251889 35.874222 129.170970 
 127.251889 35.874333 129.080312 
 127.252000 35.874333 123.472174 
 127.252000 35.874444 122.902681 
 127.252000 35.874556 122.273595 
 127.252111 35.874556 119.694725 
 127.252111 35.874667 119.923299 
 127.252111 35.874778 120.257573 
 127.252222 35.874778 117.858221 
 127.252222 35.874889 118.115887 
 127.252222 35.875000 119.046573 
 127.252333 35.875000 110.758023 
 127.252333 35.875111 112.789489 
 127.252333 35.875222 117.785232 
 127.252444 35.875222 111.704330 
 127.252444 35.875333 117.949063 
 127.252444 35.875444 123.353973 
 127.252444 35.875556 126.062467 
 127.252556 35.875556 125.617220 
 127.252556 35.875667 129.324930 
 127.252556 35.875778 133.009634 
 127.252667 35.875778 142.840375 
 127.252667 35.875889 147.557418 
 127.252667 35.876000 150.581483 
 127.252778 35.876000 152.688504 
 127.252778 35.876111 154.396994 
 127.252778 35.876222 155.805747 
 127.252889 35.876222 155.002489 
 127.252889 35.876333 156.389036 
 127.252889 35.876444 159.187207 
 127.253000 35.876444 157.056270 
 127.253000 35.876556 161.481122 
 127.253000 35.876667 165.913292 
 127.253111 35.876778 163.147106 
 127.253111 35.876889 163.462776 
 127.253111 35.877000 161.368295 
 127.253222 35.877000 153.149763 
 127.253222 35.877111 149.526445 
 127.253222 35.877222 145.758925 
 127.253333 35.877222 139.789872 
 127.253333 35.877333 138.235582 
 127.253333 35.877445 137.640231 
 127.253444 35.877445 133.218720 
 127.253444 35.877556 132.635388 
 127.253444 35.877667 133.078876 
 127.253556 35.877667 127.331148 
 127.253556 35.877778 127.262827 
 127.253556 35.877889 129.477452 
 127.253667 35.877889 125.650602 
 127.253667 35.878000 128.179947 
 127.253667 35.878111 134.293324 
 127.253667 35.878222 141.268616 
 127.253778 35.878222 143.363376 
 127.253778 35.878333 145.015391 
 127.253778 35.878445 144.502582 
 127.253889 35.878445 144.550611 
 127.253889 35.878556 140.233011 
 127.253889 35.878667 132.582809 
 127.254000 35.878667 130.555973 
 127.254000 35.878778 125.367530 
 127.254000 35.878889 122.869006 
 127.254111 35.878889 126.080100 
 127.254111 35.879000 121.811635 
 127.254111 35.879111 118.482145 
 127.254222 35.879111 114.682080 
 127.254222 35.879222 110.084861 
 127.254222 35.879333 107.115134 
 127.254222 35.879445 105.592398 
 127.254333 35.879445 107.508369 
 127.254333 35.879556 105.545631 
 127.254333 35.879667 104.948369 
 127.254444 35.879667 105.024708 
 127.254444 35.879778 104.836688 
 127.254444 35.879889 105.404500 
 127.254556 35.879889 103.331904 
 127.254556 35.880000 104.364589 
 127.254556 35.880111 105.049300 
 127.254667 35.880111 103.030563 
 127.254667 35.880222 104.488137 
 127.254667 35.880333 105.738509 
 127.254778 35.880333 103.786492 
 127.254778 35.880444 106.957405 
 127.254778 35.880555 112.567258 
 127.254778 35.880667 120.789452 
 127.254889 35.880667 114.351242 
 127.254889 35.880778 119.398577 
 127.254889 35.880889 123.708146 
 127.255000 35.880889 112.079046 
 127.255000 35.881000 115.176481 
 127.255000 35.881111 120.106299 
 127.255111 35.881111 117.963956 
 127.255111 35.881222 124.658181 
 127.255111 35.881333 129.969879 
 127.255222 35.881333 126.676857 
 127.255222 35.881444 130.068877 
 127.255222 35.881555 131.161181 
 127.255333 35.881555 122.979938 
 127.255333 35.881667 125.590890 
 127.255333 35.881778 126.339245 
 127.255333 35.881889 126.706299 
 127.255444 35.881889 121.567369 
 127.255444 35.882000 125.241485 
 127.255444 35.882111 128.081842 
 127.255556 35.882111 120.203095 
 127.255556 35.882222 123.580968 
 127.255556 35.882333 125.000797 
 127.255667 35.882333 121.128495 
 127.255667 35.882444 123.195938 
 127.255667 35.882556 124.174131 
 127.255778 35.882556 121.897674 
 127.255778 35.882667 123.805913 
 127.255778 35.882778 124.717564 
 127.255889 35.882778 122.276214 
 127.255889 35.882889 123.885687 
 127.255889 35.883000 124.173440 
 127.255889 35.883111 123.447798 
 127.256000 35.883111 119.718438 
 127.256000 35.883222 118.922699 
 127.256000 35.883333 117.552737 
 127.256111 35.883333 118.409100 
 127.256111 35.883444 118.291680 
 127.256111 35.883556 118.099656 
 127.256222 35.883556 117.976501 
 127.256222 35.883667 118.441796 
 127.256222 35.883778 119.293677 
 127.256333 35.883778 113.718437 
 127.256333 35.883889 113.740651 
 127.256333 35.884000 114.127980 
 127.256444 35.884000 111.557734 
 127.256444 35.884111 112.032084 
 127.256444 35.884222 112.808649 
 127.256444 35.884333 114.490963 
 127.256556 35.884333 112.301903 
 127.256556 35.884444 113.790784 
 127.256556 35.884556 115.910205 
 127.256667 35.884556 113.018756 
 127.256667 35.884667 113.949954 
 127.256667 35.884778 114.546016 
 127.256778 35.884778 113.345819 
 127.256778 35.884889 113.879778 
 127.256778 35.885000 114.431511 
 127.256889 35.885000 113.329893 
 127.256889 35.885111 114.285682 
 127.256889 35.885222 115.677063 
 127.257000 35.885222 115.316132 
 127.257000 35.885333 116.268519 
 127.257000 35.885444 116.993466 
 127.257000 35.885556 117.740061 
 127.257111 35.885556 116.317240 
 127.257111 35.885667 116.496873 
 127.257111 35.885778 116.696724 
 127.257222 35.885778 116.197037 
 127.257222 35.885889 116.455434 
 127.257222 35.886000 116.681444 
 127.257333 35.886000 116.449186 
 127.257333 35.886111 116.605115 
 127.257333 35.886222 116.769166 
 127.257444 35.886222 116.361411 
 127.257444 35.886333 116.594579 
 127.257444 35.886444 116.912549 
 127.257556 35.886444 116.728768 
 127.257556 35.886556 117.025006 
 127.257556 35.886667 117.173219 
 127.257556 35.886778 117.310319 
 127.257667 35.886778 116.972491 
 127.257667 35.886889 116.940166 
 127.257667 35.887000 116.983506 
 127.257778 35.887000 115.898830 
 127.257778 35.887111 115.818736 
 127.257778 35.887222 115.987791 
 127.257889 35.887222 115.420785 
 127.257889 35.887333 115.724983 
 127.257889 35.887444 116.446772 
 127.258000 35.887444 116.583830 
 127.258000 35.887556 117.157713 
 127.258000 35.887667 117.585101 
 127.258111 35.887667 117.321291 
 127.258111 35.887778 117.460462 
 127.258111 35.887889 117.785003 
 127.258222 35.887889 118.274799 
 127.258222 35.888000 119.461733 
 127.258222 35.888111 120.533942 
 127.258222 35.888222 121.046647 
 127.258333 35.888222 121.146530 
 127.258333 35.888333 121.289080 
 127.258333 35.888444 121.495203 
 127.258444 35.888444 121.647549 
 127.258444 35.888556 122.024375 
 127.258444 35.888667 122.577669 
 127.258556 35.888667 124.076193 
 127.258556 35.888778 124.424522 
 127.258556 35.888889 124.496737 
 127.258667 35.888889 129.878477 
 127.258667 35.889000 129.652410 
 127.258667 35.889111 129.348076 
 127.258778 35.889111 130.931264 
 127.258778 35.889222 130.427847 
 127.258778 35.889333 129.562220 
 127.258778 35.889444 128.925564 
 127.258889 35.889444 128.600705 
 127.258889 35.889556 127.830943 
 127.258889 35.889667 128.194730 
 127.259000 35.889667 126.630720 
 127.259000 35.889778 127.475904 
 127.259000 35.889889 130.067495 
 127.259111 35.889889 128.841223 
 127.259111 35.890000 131.598255 
 127.259111 35.890111 133.924559 
 127.259222 35.890111 133.176549 
 127.259222 35.890222 134.296745 
 127.259222 35.890333 135.178962 
 127.259333 35.890333 133.165120 
 127.259333 35.890445 133.392577 
 127.259333 35.890556 134.070617 
 127.259333 35.890667 135.577912 
 127.259444 35.890667 133.814292 
 127.259444 35.890778 135.858990 
 127.259444 35.890889 139.656540 
 127.259556 35.890889 143.082882 
 127.259556 35.891000 146.688816 
 127.259556 35.891111 148.538115 
 127.259667 35.891111 148.937843 
 127.259667 35.891222 149.714188 
 127.259667 35.891333 150.367612 
 127.259778 35.891333 148.858258 
 127.259778 35.891445 151.113584 
 127.259778 35.891556 155.632748 
 127.259889 35.891556 165.073715 
 127.259889 35.891667 177.208177 
 127.259889 35.891778 185.489881 
 127.259889 35.891889 188.950242 
 127.260000 35.891889 187.810521 
 127.260000 35.892000 190.186407 
 127.260000 35.892111 191.221802 
 127.260111 35.892111 190.609944 
 127.260111 35.892222 194.634448 
 127.260111 35.892333 202.318843 
 127.260222 35.892333 213.247968 
 127.260222 35.892444 221.078262 
 127.260222 35.892555 224.723421 
 127.260333 35.892555 224.381230 
 127.260333 35.892667 227.511192 
 127.260333 35.892778 232.824667 
 127.260444 35.892778 229.048327 
 127.260444 35.892889 238.188591 
 127.260444 35.893000 252.463352 
 127.260444 35.893111 265.106622 
 127.260556 35.893111 262.969097 
 127.260556 35.893222 269.410805 
 127.260556 35.893333 272.902777 
 127.260667 35.893333 269.481572 
 127.260667 35.893444 273.858005 
 127.260667 35.893555 279.584487 
 127.260778 35.893555 284.470096 
 127.260778 35.893667 291.354362 
 127.260778 35.893778 293.560724 
 127.260889 35.893778 295.578721 
 127.260889 35.893889 295.859960 
 127.260889 35.894000 296.024202 
 127.261000 35.894000 302.914155 
 127.261000 35.894111 307.123626 
 127.261000 35.894222 310.193976 
 127.261000 35.894333 311.054490 
 127.261111 35.894333 313.841671 
 127.261111 35.894444 314.137498 
 127.261111 35.894555 313.947934 
 127.261222 35.894555 316.264311 
 127.261222 35.894667 316.595853 
 127.261222 35.894778 317.667262 
 127.261333 35.894778 328.697029 
 127.261333 35.894889 330.122415 
 127.261333 35.895000 330.397895 
 127.261444 35.895000 335.086827 
 127.261444 35.895111 333.899021 
 127.261444 35.895222 332.546061 
 127.261556 35.895222 338.641153 
 127.261556 35.895333 332.681056 
 127.261556 35.895444 331.029636 
 127.261556 35.895556 331.560176 
 127.261667 35.895556 338.762671 
 127.261667 35.895667 341.259831 
 127.261667 35.895778 346.193414 
 127.261778 35.895778 363.084160 
 127.261778 35.895889 366.406600 
 127.261778 35.896000 373.925062 
 127.261889 35.896000 379.037694 
 127.261889 35.896111 388.553132 
 127.261889 35.896222 395.039617 
 127.262000 35.896222 397.595120 
 127.262000 35.896333 398.748499 
 127.262000 35.896444 399.421269 
 127.262111 35.896444 402.211547 
 127.262111 35.896556 404.628654 
 127.262111 35.896667 412.282482 
 127.262222 35.896778 451.907497 
 127.262222 35.896889 459.303326 
 127.262222 35.897000 462.638770 
 127.262333 35.897000 462.425722 
 127.262333 35.897111 463.746385 
 127.262333 35.897222 466.252971 
 127.262444 35.897222 467.742921 
 127.262444 35.897333 473.877295 
 127.262444 35.897444 480.677091 
 127.262556 35.897444 479.926150 
 127.262556 35.897556 482.641456 
 127.262556 35.897667 482.454486 
 127.262667 35.897667 469.799914 
 127.262667 35.897778 467.785702 
 127.262667 35.897889 466.544962 
 127.262778 35.897889 464.307956 
 127.262778 35.898000 463.035941 
 127.262778 35.898111 460.842993 
 127.262778 35.898222 456.887692 
 127.262889 35.898222 441.381408 
 127.262889 35.898333 436.813578 
 127.262889 35.898444 435.891143 
 127.263000 35.898444 431.828744 
 127.263000 35.898556 434.350797 
 127.263000 35.898667 440.908382 
 127.263111 35.898667 442.579461 
 127.263111 35.898778 449.383319 
 127.263111 35.898889 453.438277 
 127.263222 35.898889 448.541490 
 127.263222 35.899000 451.417091 
 127.263222 35.899111 452.927865 
 127.263333 35.899111 447.230025 
 127.263333 35.899222 448.772273 
 127.263333 35.899333 452.576931 
 127.263333 35.899444 459.713455 
 127.263444 35.899444 451.862543 
 127.263444 35.899556 455.471808 
 127.263444 35.899667 458.647020 
 127.263556 35.899667 453.739729 
 127.263556 35.899778 456.236971 
 127.263556 35.899889 460.951448 
 127.263667 35.899889 456.387109 
 127.263667 35.900000 461.881011 
 127.263667 35.900111 469.209074 
 127.263778 35.900111 464.158866 
 127.263778 35.900222 466.005090 
 127.263778 35.900333 466.435915 
 127.263889 35.900333 462.522288 
 127.263889 35.900444 461.520663 
 127.263889 35.900556 460.430022 
 127.263889 35.900667 459.237454 
 127.264000 35.900667 452.947720 
 127.264000 35.900778 452.030242 
 127.264000 35.900889 449.777464 
 127.264111 35.900889 451.449987 
 127.264111 35.901000 448.298918 
 127.264111 35.901111 445.129082 
 127.264222 35.901111 449.031448 
 127.264222 35.901222 444.432001 
 127.264222 35.901333 440.098527 
 127.264333 35.901333 442.182525 
 127.264333 35.901444 439.642815 
 127.264333 35.901556 435.328191 
 127.264444 35.901556 438.331489 
 127.264444 35.901667 432.694224 
 127.264444 35.901778 421.434939 
 127.264444 35.901889 406.393709 
 127.264556 35.901889 400.263999 
 127.264556 35.902000 391.489745 
 127.264556 35.902111 387.032556 
 127.264667 35.902111 384.023930 
 127.264667 35.902222 380.641406 
 127.264667 35.902333 376.290879 
 127.264778 35.902333 364.309199 
 127.264778 35.902445 357.543366 
 127.264778 35.902556 352.102538 
 127.264889 35.902556 346.945932 
 127.264889 35.902667 344.347887 
 127.264889 35.902778 341.037358 
 127.265000 35.902778 338.827685 
 127.265000 35.902889 331.770871 
 127.265000 35.903000 321.586351 
 127.265000 35.903111 311.499496 
 127.265111 35.903111 311.990764 
 127.265111 35.903222 305.004513 
 127.265111 35.903333 300.416962 
 127.265222 35.903333 306.038640 
 127.265222 35.903445 301.042306 
 127.265222 35.903556 296.794302 
 127.265333 35.903556 298.703004 
 127.265333 35.903667 293.675954 
 127.265333 35.903778 287.879552 
 127.265444 35.903778 293.238167 
 127.265444 35.903889 288.817253 
 127.265444 35.904000 282.825828 
 127.265556 35.904000 288.794202 
 127.265556 35.904111 282.934028 
 127.265556 35.904222 275.241799 
 127.265556 35.904333 266.806897 
 127.265667 35.904333 265.392891 
 127.265667 35.904445 258.007217 
 127.265667 35.904556 251.550167 
 127.265778 35.904556 255.170070 
 127.265778 35.904667 250.298491 
 127.265778 35.904778 246.232065 
 127.265889 35.904778 246.948905 
 127.265889 35.904889 242.657140 
 127.265889 35.905000 239.230603 
 127.266000 35.905000 233.312752 
 127.266000 35.905111 230.654766 
 127.266000 35.905222 227.475134 
 127.266111 35.905222 227.441897 
 127.266111 35.905333 225.066838 
 127.266111 35.905444 222.500623 
 127.266111 35.905555 220.624048 
 127.266222 35.905555 224.206432 
 127.266222 35.905667 223.767192 
 127.266222 35.905778 223.783410 
 127.266333 35.905778 225.633562 
 127.266333 35.905889 226.295543 
 127.266333 35.906000 227.609657 
 127.266444 35.906000 229.407469 
 127.266444 35.906111 231.558166 
 127.266444 35.906222 234.436862 
 127.266556 35.906222 241.130692 
 127.266556 35.906333 242.919255 
 127.266556 35.906444 244.704571 
 127.266667 35.906444 249.664239 
 127.266667 35.906555 251.490241 
 127.266667 35.906667 253.943688 
 127.266667 35.906778 256.117264 
 127.266778 35.906778 265.369231 
 127.266778 35.906889 265.557602 
 127.266778 35.907000 264.778016 
 127.266889 35.907000 283.138428 
 127.266889 35.907111 282.768235 
 127.266889 35.907222 281.489730 
 127.267000 35.907222 291.607049 
 127.267000 35.907333 290.443687 
 127.267000 35.907444 288.088074 
 127.267111 35.907444 292.933317 
 127.267111 35.907555 291.883455 
 127.267111 35.907667 291.105186 
 127.267222 35.907667 298.509897 
 127.267222 35.907778 302.243560 
 127.267222 35.907889 304.332691 
 127.267222 35.908000 304.358722 
 127.267333 35.908000 308.565675 
 127.267333 35.908111 308.074895 
 127.267333 35.908222 307.223474 
 127.267444 35.908222 310.869772 
 127.267444 35.908333 310.731608 
 127.267444 35.908444 311.113635 
 127.267556 35.908444 323.920389 
 127.267556 35.908556 324.375290 
 127.267556 35.908667 323.426879 
 127.267667 35.908667 328.804599 
 127.267667 35.908778 329.317518 
 127.267667 35.908889 330.936493 
 127.267778 35.909000 347.931534 
 127.267778 35.909111 350.308653 
 127.267778 35.909222 350.043459 
 127.267889 35.909222 353.753872 
 127.267889 35.909333 352.778312 
 127.267889 35.909444 350.108254 
 127.268000 35.909444 353.012299 
 127.268000 35.909556 347.360999 
 127.268000 35.909667 338.966215 
 127.268111 35.909667 347.162218 
 127.268111 35.909778 338.079000 
 127.268111 35.909889 332.762612 
 127.268222 35.909889 339.978506 
 127.268222 35.910000 333.098827 
 127.268222 35.910111 326.045388 
 127.268222 35.910222 316.269470 
 127.268333 35.910222 314.918932 
 127.268333 35.910333 299.964470 
 127.268333 35.910444 292.050713 
 127.268444 35.910444 297.746505 
 127.268444 35.910556 292.384581 
 127.268444 35.910667 290.387385 
 127.268556 35.910667 302.478352 
 127.268556 35.910778 300.097455 
 127.268556 35.910889 301.495120 
 127.268667 35.910889 315.430366 
 127.268667 35.911000 315.078554 
 127.268667 35.911111 315.017950 
 127.268778 35.911111 318.728838 
 127.268778 35.911222 316.791706 
 127.268778 35.911333 314.148351 
 127.268778 35.911444 309.640122 
 127.268889 35.911444 314.233013 
 127.268889 35.911556 305.361557 
 127.268889 35.911667 295.229091 
 127.269000 35.911667 308.581836 
 127.269000 35.911778 300.781369 
 127.269000 35.911889 295.380853 
 127.269111 35.911889 301.834817 
 127.269111 35.912000 298.699830 
 127.269111 35.912111 295.143850 
 127.269222 35.912111 302.808427 
 127.269222 35.912222 299.107934 
 127.269222 35.912333 290.882598 
 127.269333 35.912333 305.975238 
 127.269333 35.912444 292.293556 
 127.269333 35.912556 275.992326 
 127.269333 35.912667 265.526853 
 127.269444 35.912667 280.427307 
 127.269444 35.912778 273.561043 
 127.269444 35.912889 272.522913 
 127.269556 35.912889 282.908306 
 127.269556 35.913000 283.777408 
 127.269556 35.913111 285.554302 
 127.269667 35.913111 289.113894 
 127.269667 35.913222 290.420967 
 127.269667 35.913333 289.239156 
 127.269778 35.913333 306.391147 
 127.269778 35.913444 301.443821 
 127.269778 35.913556 291.465999 
 127.269889 35.913556 315.017155 
 127.269889 35.913667 304.407964 
 127.269889 35.913778 289.856461 
 127.269889 35.913889 275.696526 
 127.270000 35.913889 291.660799 
 127.270000 35.914000 275.110628 
 127.270000 35.914111 262.819793 
 127.270111 35.914111 279.155927 
 127.270111 35.914222 268.533789 
 127.270111 35.914333 260.174382 
 127.270222 35.914333 279.456332 
 127.270222 35.914444 269.881675 
 127.270222 35.914556 261.886949 
 127.270333 35.914556 277.541599 
 127.270333 35.914667 270.694372 
 127.270333 35.914778 265.827327 
 127.270333 35.914889 262.473272 
 127.270444 35.914889 270.770409 
 127.270444 35.915000 267.873343 
 127.270444 35.915111 265.434876 
 127.270556 35.915111 269.108153 
 127.270556 35.915222 266.248093 
 127.270556 35.915333 262.073091 
 127.270667 35.915333 267.054411 
 127.270667 35.915445 261.598758 
 127.270667 35.915556 254.048470 
 127.270778 35.915556 267.815675 
 127.270778 35.915667 260.316240 
 127.270778 35.915778 252.463438 
 127.270889 35.915778 264.373569 
 127.270889 35.915889 257.075442 
 127.270889 35.916000 252.409100 
 127.270889 35.916111 250.468952 
 127.271000 35.916111 255.225321 
 127.271000 35.916222 252.629531 
 127.271000 35.916333 251.063473 
 127.271111 35.916333 259.984421 
 127.271111 35.916445 256.412157 
 127.271111 35.916556 252.186891 
 127.271222 35.916556 269.983451 
 127.271222 35.916667 260.421792 
 127.271222 35.916778 253.528991 
 127.271333 35.916778 261.807615 
 127.271333 35.916889 255.660123 
 127.271333 35.917000 252.940281 
 127.271333 35.917111 252.074951 
 127.271444 35.917111 259.205188 
 127.271444 35.917222 258.484740 
 127.271444 35.917333 261.217458 
 127.271556 35.917333 273.465267 
 127.271556 35.917444 274.591614 
 127.271556 35.917556 275.745471 
 127.271667 35.917556 276.066040 
 127.271667 35.917667 277.334625 
 127.271667 35.917778 279.170991 
 127.271778 35.917778 290.685909 
 127.271778 35.917889 302.091490 
 127.271778 35.918000 311.996571 
 127.271889 35.918000 320.011453 
 127.271889 35.918111 323.950885 
 127.271889 35.918222 324.794345 
 127.271889 35.918333 323.529933 
 127.272000 35.918333 321.984545 
 127.272000 35.918444 316.976653 
 127.272000 35.918555 306.471219 
 127.272111 35.918555 301.726885 
 127.272111 35.918667 296.517197 
 127.272111 35.918778 289.942852 
 127.272222 35.918778 295.537704 
 127.272222 35.918889 290.658017 
 127.272222 35.919000 281.921600 
 127.272333 35.919000 278.816101 
 127.272333 35.919111 273.299858 
 127.272333 35.919222 270.134965 
 127.272333 35.919333 268.116175 
 127.272444 35.919333 271.215221 
 127.272444 35.919444 271.530801 
 127.272444 35.919555 272.064286 
 127.272556 35.919555 280.393470 
 127.272556 35.919667 282.152872 
 127.272556 35.919778 282.293204 
 127.272667 35.919778 287.564175 
 127.272667 35.919889 286.104441 
 127.272667 35.920000 283.382840 
 127.272778 35.920000 287.298794 
 127.272778 35.920111 282.589894 
 127.272778 35.920222 278.553713 
 127.272889 35.920222 281.460977 
 127.272889 35.920333 280.567005 
 127.272889 35.920444 279.802338 
 127.272889 35.920556 278.547926 
 127.273000 35.920556 281.885825 
 127.273000 35.920667 281.851375 
 127.273000 35.920778 281.081235 
 127.273111 35.920778 284.536540 
 127.273111 35.920889 283.498931 
 127.273111 35.921000 281.859185 
 127.273222 35.921000 282.438803 
 127.273222 35.921111 279.108841 
 127.273222 35.921222 272.822766 
 127.273333 35.921222 259.770083 
 127.273333 35.921333 253.041830 
 127.273333 35.921444 249.057899 
 127.273333 35.921556 246.286500 
 127.273444 35.921556 246.645724 
 127.273444 35.921667 244.504213 
 127.273444 35.921778 239.915422 
 127.273556 35.921778 231.421560 
 127.273556 35.921889 222.418052 
 127.273556 35.922000 215.746457 
 127.273667 35.922000 210.428105 
 127.273667 35.922111 209.047402 
 127.273667 35.922222 208.665013 
 127.273778 35.922222 207.886587 
 127.273778 35.922333 206.454326 
 127.273778 35.922444 202.271449 
 127.273889 35.922556 185.879635 
 127.273889 35.922667 182.517774 
 127.273889 35.922778 180.851113 
 127.274000 35.922778 181.554863 
 127.274000 35.922889 180.568943 
 127.274000 35.923000 178.976865 
 127.274111 35.923000 178.824281 
 127.274111 35.923111 175.689531 
 127.274111 35.923222 171.667107 
 127.274222 35.923222 170.451251 
 127.274222 35.923333 169.030758 
 127.274222 35.923444 167.229208 
 127.274333 35.923444 168.555841 
 127.274333 35.923556 166.814841 
 127.274333 35.923667 164.294486 
 127.274333 35.923778 162.427400 
 127.274444 35.923778 161.820239 
 127.274444 35.923889 161.268507 
 127.274444 35.924000 160.963625 
 127.274556 35.924000 161.043041 
 127.274556 35.924111 160.906818 
 127.274556 35.924222 160.724691 
 127.274667 35.924222 160.665569 
 127.274667 35.924333 160.564530 
 127.274667 35.924444 160.498962 
 127.274778 35.924444 160.508648 
 127.274778 35.924556 160.557411 
 127.274778 35.924667 160.566834 
 127.274778 35.924778 160.127736 
 127.274889 35.924778 163.588487 
 127.274889 35.924889 163.709542 
 127.274889 35.925000 163.336012 
 127.275000 35.925000 166.277047 
 127.275000 35.925111 168.086904 
 127.275000 35.925222 171.751088 
 127.275111 35.925222 178.800274 
 127.275111 35.925333 182.513528 
 127.275111 35.925444 184.400078 
 127.275222 35.925444 187.192202 
 127.275222 35.925556 188.573873 
 127.275222 35.925667 192.754654 
 127.275333 35.925778 209.395574 
 127.275333 35.925889 211.113629 
 127.275333 35.926000 212.788864 
 127.275444 35.926000 215.583023 
 127.275444 35.926111 220.478325 
 127.275444 35.926222 229.666478 
 127.275556 35.926222 241.105927 
 127.275556 35.926333 245.073585 
 127.275556 35.926444 246.581950 
 127.275667 35.926444 249.301790 
 127.275667 35.926556 250.615689 
 127.275667 35.926667 255.258840 
 127.275778 35.926667 261.812798 
 127.275778 35.926778 277.636629 
 127.275778 35.926889 296.999661 
 127.275778 35.927000 306.479043 
 127.275889 35.927000 307.019174 
 127.275889 35.927111 311.295316 
 127.275889 35.927222 314.242992 
 127.276000 35.927222 322.055971 
 127.276000 35.927333 325.530693 
 127.276000 35.927445 329.234899 
 127.276111 35.927445 329.998203 
 127.276111 35.927556 335.181430 
 127.276111 35.927667 337.762624 
 127.276222 35.927667 340.396610 
 127.276222 35.927778 340.566218 
 127.276222 35.927889 340.403853 
 127.276222 35.928000 339.406163 
 127.276333 35.928000 347.138061 
 127.276333 35.928111 341.408575 
 127.276333 35.928222 338.599853 
 127.276444 35.928222 341.698667 
 127.276444 35.928333 340.164533 
 127.276444 35.928445 339.578354 
 127.276556 35.928445 341.401801 
 127.276556 35.928556 340.300921 
 127.276556 35.928667 338.028370 
 127.276667 35.928667 341.517655 
 127.276667 35.928778 338.069493 
 127.276667 35.928889 334.340569 
 127.276778 35.928889 338.660983 
 127.276778 35.929000 335.863161 
 127.276778 35.929111 330.435327 
 127.276778 35.929222 322.466686 
 127.276889 35.929222 324.462333 
 127.276889 35.929333 319.682284 
 127.276889 35.929445 317.359135 
 127.277000 35.929445 320.364100 
 127.277000 35.929556 317.317356 
 127.277000 35.929667 313.374613 
 127.277111 35.929667 308.654488 
 127.277111 35.929778 299.821339 
 127.277111 35.929889 293.417118 
 127.277222 35.929889 294.780086 
 127.277222 35.930000 291.998659 
 127.277222 35.930111 289.693958 
 127.277222 35.930222 286.218207 
 127.277333 35.930222 289.783479 
 127.277333 35.930333 283.594239 
 127.277333 35.930444 275.675552 
 127.277444 35.930444 284.860287 
 127.277444 35.930555 279.464208 
 127.277444 35.930667 274.914534 
 127.277556 35.930667 282.280056 
 127.277556 35.930778 278.860108 
 127.277556 35.930889 278.009391 
 127.277667 35.930889 276.113944 
 127.277667 35.931000 275.821280 
 127.277667 35.931111 276.653866 
 127.277778 35.931111 275.747012 
 127.277778 35.931222 277.823458 
 127.277778 35.931333 283.554715 
 127.277778 35.931444 295.733682 
 127.277889 35.931444 314.650076 
 127.277889 35.931555 326.809902 
 127.277889 35.931667 333.544912 
 127.278000 35.931667 334.165739 
 127.278000 35.931778 337.261907 
 127.278000 35.931889 339.467018 
 127.278111 35.931889 337.944591 
 127.278111 35.932000 340.542316 
 127.278111 35.932111 346.482185 
 127.278222 35.932111 344.834651 
 127.278222 35.932222 359.994304 
 127.278222 35.932333 384.981018 
 127.278222 35.932444 400.364434 
 127.278333 35.932444 401.720687 
 127.278333 35.932555 407.501390 
 127.278333 35.932667 409.195876 
 127.278444 35.932667 409.138929 
 127.278444 35.932778 411.006827 
 127.278444 35.932889 413.228482 
 127.278556 35.932889 415.317753 
 127.278556 35.933000 420.440884 
 127.278556 35.933111 425.391610 
 127.278667 35.933111 438.804972 
 127.278667 35.933222 439.932586 
 127.278667 35.933333 438.810388 
 127.278778 35.933333 442.540308 
 127.278778 35.933444 439.860967 
 127.278778 35.933556 437.493146 
 127.278778 35.933667 436.496572 
 127.278889 35.933667 440.444476 
 127.278889 35.933778 441.080642 
 127.278889 35.933889 444.444505 
 127.279000 35.933889 463.266692 
 127.279000 35.934000 467.553163 
 127.279000 35.934111 471.046628 
 127.279111 35.934111 472.807100 
 127.279111 35.934222 474.049365 
 127.279111 35.934333 474.114071 
 127.279222 35.934333 476.113672 
 127.279222 35.934444 474.467055 
 127.279222 35.934556 469.535690 
 127.279333 35.934556 474.030020 
 127.279333 35.934667 457.981786 
 127.279333 35.934778 433.168480 
 127.279333 35.934889 413.865664 
 127.279444 35.934889 428.554174 
 127.279444 35.935000 413.733792 
 127.279444 35.935111 404.194339 
 127.279556 35.935111 408.938217 
 127.279556 35.935222 395.080863 
 127.279556 35.935333 384.144633 
 127.279667 35.935333 383.760318 
 127.279667 35.935444 378.573827 
 127.279667 35.935556 374.323469 
 127.279778 35.935556 378.801469 
 127.279778 35.935667 376.428964 
 127.279778 35.935778 372.745960 
 127.279889 35.935889 374.082238 
 127.279889 35.936000 368.122370 
 127.279889 35.936111 364.479334 
 127.280000 35.936111 377.851944 
 127.280000 35.936222 376.021024 
 127.280000 35.936333 374.142086 
 127.280111 35.936333 380.033026 
 127.280111 35.936444 377.924375 
 127.280111 35.936556 373.790893 
 127.280222 35.936556 378.810631 
 127.280222 35.936667 372.825086 
 127.280222 35.936778 364.455532 
 127.280333 35.936778 370.407408 
 127.280333 35.936889 362.483144 
 127.280333 35.937000 358.871146 
 127.280444 35.937111 360.487599 
 127.280444 35.937222 357.975818 
 127.280444 35.937333 354.710580 
 127.280556 35.937333 357.318603 
 127.280556 35.937444 350.563058 
 127.280556 35.937556 338.673314 
 127.280667 35.937556 335.491076 
 127.280667 35.937667 323.065658 
 127.280667 35.937778 313.919581 
 127.280778 35.937778 317.598779 
 127.280778 35.937889 313.727901 
 127.280778 35.938000 309.465873 
 127.280889 35.938000 305.070224 
 127.280889 35.938111 297.014821 
 127.280889 35.938222 290.842358 
 127.281000 35.938333 288.446331 
 127.281000 35.938444 289.084193 
 127.281000 35.938556 291.169538 
 127.281111 35.938556 297.043998 
 127.281111 35.938667 300.370416 
 127.281111 35.938778 302.369480 
 127.281222 35.938778 306.782585 
 127.281222 35.938889 305.543707 
 127.281222 35.939000 304.729035 
 127.281333 35.939000 310.353908 
 127.281333 35.939111 307.541645 
 127.281333 35.939222 306.048516 
 127.281444 35.939222 309.794494 
 127.281444 35.939333 305.582628 
 127.281444 35.939444 300.152205 
 127.281556 35.939444 302.607952 
 127.281556 35.939556 289.943954 
 127.281556 35.939667 276.249794 
 127.281556 35.939778 268.017892 
 127.281667 35.939778 278.196046 
 127.281667 35.939889 269.235045 
 127.281667 35.940000 264.611950 
 127.281778 35.940000 274.821886 
 127.281778 35.940111 269.948563 
 127.281778 35.940222 268.046467 
 127.281889 35.940222 279.348598 
 127.281889 35.940333 279.329960 
 127.281889 35.940445 280.026774 
 127.282000 35.940445 290.443760 
 127.282000 35.940556 292.406337 
 127.282000 35.940667 292.954660 
 127.282111 35.940667 295.733079 
 127.282111 35.940778 296.227407 
 127.282111 35.940889 296.712789 
 127.282111 35.941000 297.503655 
 127.282222 35.941000 305.603658 
 127.282222 35.941111 307.616791 
 127.282222 35.941222 308.541541 
 127.282333 35.941222 310.168660 
 127.282333 35.941333 310.140812 
 127.282333 35.941445 310.754430 
 127.282444 35.941445 317.097615 
 127.282444 35.941556 319.405409 
 127.282444 35.941667 321.846471 
 127.282556 35.941667 326.139716 
 127.282556 35.941778 328.157614 
 127.282556 35.941889 332.482532 
 127.282667 35.941889 341.085774 
 127.282667 35.942000 346.051305 
 127.282667 35.942111 348.600380 
 127.282667 35.942222 349.772338 
 127.282778 35.942222 351.522395 
 127.282778 35.942333 353.389979 
 127.282778 35.942444 357.147035 
 127.282889 35.942444 365.626747 
 127.282889 35.942556 369.209351 
 127.282889 35.942667 371.187421 
 127.283000 35.942667 374.416441 
 127.283000 35.942778 376.261895 
 127.283000 35.942889 379.766869 
 127.283111 35.942889 395.187397 
 127.283111 35.943000 398.885521 
 127.283111 35.943111 401.239927 
 127.283222 35.943111 402.945643 
 127.283222 35.943222 403.341031 
 127.283222 35.943333 403.044712 
 127.283333 35.943333 403.526864 
 127.283333 35.943444 401.184953 
 127.283333 35.943555 399.119213 
 127.283333 35.943667 397.699471 
 127.283444 35.943667 396.390878 
 127.283444 35.943778 392.118063 
 127.283444 35.943889 386.006705 
 127.283556 35.943889 371.745872 
 127.283556 35.944000 366.181695 
 127.283556 35.944111 362.861690 
 127.283667 35.944111 361.027627 
 127.283667 35.944222 357.313623 
 127.283667 35.944333 352.946011 
 127.283778 35.944333 343.492683 
 127.283778 35.944444 340.083959 
 127.283778 35.944555 338.680924 
 127.283889 35.944555 336.514058 
 127.283889 35.944667 336.305666 
 127.283889 35.944778 335.745340 
 127.283889 35.944889 334.795576 
 127.284000 35.944889 326.988416 
 127.284000 35.945000 325.968936 
 127.284000 35.945111 325.663994 
 127.284111 35.945111 322.776957 
 127.284111 35.945222 322.562165 
 127.284111 35.945333 321.510329 
 127.284222 35.945333 313.536007 
 127.284222 35.945444 308.730135 
 127.284222 35.945556 305.374891 
 127.284333 35.945556 299.670090 
 127.284333 35.945667 299.409753 
 127.284333 35.945778 299.692521 
 127.284444 35.945778 297.664838 
 127.284444 35.945889 298.510969 
 127.284444 35.946000 300.279246 
 127.284556 35.946000 294.208456 
 127.284556 35.946111 297.136102 
 127.284556 35.946222 301.642706 
 127.284556 35.946333 305.269827 
 127.284667 35.946333 289.668239 
 127.284667 35.946444 297.109483 
 127.284667 35.946556 302.695548 
 127.284778 35.946556 286.764151 
 127.284778 35.946667 296.676498 
 127.284778 35.946778 303.313653 
 127.284889 35.946778 292.327903 
 127.284889 35.946889 299.055679 
 127.284889 35.947000 303.342381 
 127.285000 35.947000 290.010253 
 127.285000 35.947111 292.466954 
 127.285000 35.947222 295.311613 
 127.285111 35.947222 281.881230 
 127.285111 35.947333 282.089322 
 127.285111 35.947444 283.772453 
 127.285222 35.947444 276.674788 
 127.285222 35.947556 278.352601 
 127.285222 35.947667 282.631703 
 127.285222 35.947778 291.609776 
 127.285333 35.947778 286.638270 
 127.285333 35.947889 298.970743 
 127.285333 35.948000 310.796357 
 127.285444 35.948000 303.709444 
 127.285444 35.948111 307.136677 
 127.285444 35.948222 309.069234 
 127.285556 35.948222 304.296534 
 127.285556 35.948333 304.866746 
 127.285556 35.948444 305.006340 
 127.285667 35.948444 299.171639 
 127.285667 35.948556 295.415632 
 127.285667 35.948667 290.044936 
 127.285778 35.948667 277.820414 
 127.285778 35.948778 274.177308 
 127.285778 35.948889 272.119733 
 127.285778 35.949000 271.067127 
 127.285889 35.949000 268.903276 
 127.285889 35.949111 268.296730 
 127.285889 35.949222 268.010670 
 127.286000 35.949222 263.634107 
 127.286000 35.949333 262.746126 
 127.286000 35.949444 261.254415 
 127.286111 35.949444 255.097787 
 127.286111 35.949556 254.242057 
 127.286111 35.949667 253.734690 
 127.286222 35.949667 251.988734 
 127.286222 35.949778 252.266510 
 127.286222 35.949889 251.832662 
 127.286333 35.949889 248.287322 
 127.286333 35.950000 246.106853 
 127.286333 35.950111 241.041949 
 127.286444 35.950111 226.681366 
 127.286444 35.950222 223.181556 
 127.286444 35.950333 220.616737 
 127.286444 35.950444 217.499795 
 127.286556 35.950444 220.041314 
 127.286556 35.950556 217.794168 
 127.286556 35.950667 212.285922 
 127.286667 35.950667 202.567800 
 127.286667 35.950778 193.995105 
 127.286667 35.950889 188.077881 
 127.286778 35.950889 187.889510 
 127.286778 35.951000 185.398097 
 127.286778 35.951111 181.939729 
 127.286889 35.951111 182.645090 
 127.286889 35.951222 177.019851 
 127.286889 35.951333 170.717183 
 127.287000 35.951333 163.020402 
 127.287000 35.951444 159.101351 
 127.287000 35.951556 157.136464 
 127.287111 35.951556 157.476073 
 127.287111 35.951667 156.119071 
 127.287111 35.951778 154.224208 
 127.287111 35.951889 150.078061 
 127.287222 35.951889 150.324113 
 127.287222 35.952000 144.613867 
 127.287222 35.952111 140.511694 
 127.287333 35.952111 140.008290 
 127.287333 35.952222 139.080568 
 127.287333 35.952333 138.782702 
 127.287444 35.952333 138.913397 
 127.287444 35.952445 138.809383 
 127.287444 35.952556 138.954289 
 127.287556 35.952556 138.927627 
 127.287556 35.952667 139.276544 
 127.287556 35.952778 139.777739 
 127.287667 35.952778 139.532863 
 127.287667 35.952889 139.934712 
 127.287667 35.953000 140.091627 
 127.287778 35.953000 140.056972 
 127.287778 35.953111 139.998440 
 127.287778 35.953222 139.982041 
 127.287778 35.953333 139.973714 
 127.287889 35.953333 139.960479 
 127.287889 35.953445 139.932542 
 127.287889 35.953556 139.862258 
 127.288000 35.953556 139.731643 
 127.288000 35.953667 139.511737 
 127.288000 35.953778 139.332196 
 127.288111 35.953778 139.345680 
 127.288111 35.953889 139.150835 
 127.288111 35.954000 139.068600 
 127.288222 35.954000 138.558805 
 127.288222 35.954111 138.412173 
 127.288222 35.954222 138.617482 
 127.288333 35.954222 138.133703 
 127.288333 35.954333 138.401736 
 127.288333 35.954445 139.230846 
 127.288444 35.954445 138.893479 
 127.288444 35.954556 139.811123 
 127.288444 35.954667 141.866750 
 127.288444 35.954778 145.835895 
 127.288556 35.954778 146.539589 
 127.288556 35.954889 148.947477 
 127.288556 35.955000 153.844039 
 127.288667 35.955000 150.855980 
 127.288667 35.955111 156.666968 
 127.288667 35.955222 165.044624 
 127.288778 35.955222 160.881129 
 127.288778 35.955333 166.052459 
 127.288778 35.955444 171.527767 
 127.288889 35.955444 164.228168 
 127.288889 35.955555 170.253695 
 127.288889 35.955667 179.901679 
 127.289000 35.955667 174.492652 
 127.289000 35.955778 179.127198 
 127.289000 35.955889 184.190346 
 127.289111 35.955889 178.933349 
 127.289111 35.956000 181.821890 
 127.289111 35.956111 189.481501 
 127.289111 35.956222 203.793716 
 127.289222 35.956222 191.827655 
 127.289222 35.956333 201.265260 
 127.289222 35.956444 213.033894 
 127.289333 35.956444 196.189165 
 127.289333 35.956555 208.168247 
 127.289333 35.956667 225.423178 
 127.289444 35.956667 201.019971 
 127.289444 35.956778 224.013741 
 127.289444 35.956889 247.661547 
 127.289556 35.956889 221.493764 
 127.289556 35.957000 230.285014 
 127.289556 35.957111 238.731921 
 127.289667 35.957111 230.965296 
 127.289667 35.957222 235.677273 
 127.289667 35.957333 240.332349 
 127.289778 35.957444 240.834228 
 127.289778 35.957555 243.468250 
 127.289778 35.957667 246.988780 
 127.289889 35.957667 240.601371 
 127.289889 35.957778 243.019067 
 127.289889 35.957889 245.289684 
 127.290000 35.957889 234.326867 
 127.290000 35.958000 234.012322 
 127.290000 35.958111 234.564316 
 127.290111 35.958111 231.746069 
 127.290111 35.958222 232.234363 
 127.290111 35.958333 233.363779 
 127.290222 35.958333 230.531105 
 127.290222 35.958444 232.012792 
 127.290222 35.958556 233.006019 
 127.290333 35.958556 228.043654 
 127.290333 35.958667 229.488471 
 127.290333 35.958778 229.784378 
 127.290444 35.958889 227.610102 
 127.290444 35.959000 227.174595 
 127.290444 35.959111 226.302593 
 127.290556 35.959111 223.835631 
 127.290556 35.959222 223.744890 
 127.290556 35.959333 223.743341 
 127.290667 35.959333 222.687588 
 127.290667 35.959444 223.356848 
 127.290667 35.959556 224.129932 
 127.290778 35.959556 222.624321 
 127.290778 35.959667 224.058710 
 127.290778 35.959778 226.633132 
 127.290889 35.959778 223.161964 
 127.290889 35.959889 229.514178 
 127.290889 35.960000 233.667643 
 127.291000 35.960000 234.445772 
 127.291000 35.960111 237.156780 
 127.291000 35.960222 238.791904 
 127.291111 35.960333 240.461814 
 127.291111 35.960444 246.369989 
 127.291111 35.960556 255.400663 
 127.291222 35.960556 264.714023 
 127.291222 35.960667 270.240416 
 127.291222 35.960778 273.342636 
 127.291333 35.960778 270.010761 
 127.291333 35.960889 273.805533 
 127.291333 35.961000 276.361561 
 127.291444 35.961000 274.863932 
 127.291444 35.961111 277.207347 
 127.291444 35.961222 278.375376 
 127.291556 35.961222 275.740688 
 127.291556 35.961333 278.618906 
 127.291556 35.961444 281.450940 
 127.291667 35.961444 280.960042 
 127.291667 35.961556 285.816743 
 127.291667 35.961667 288.867373 
 127.291778 35.961778 288.578143 
 127.291778 35.961889 290.393352 
 127.291778 35.962000 293.837688 
 127.291889 35.962000 292.650078 
 127.291889 35.962111 297.136451 
 127.291889 35.962222 305.622082 
 127.292000 35.962222 311.696491 
 127.292000 35.962333 317.424740 
 127.292000 35.962444 327.858178 
 127.292111 35.962444 322.295106 
 127.292111 35.962556 333.080201 
 127.292111 35.962667 346.793187 
 127.292222 35.962667 349.100514 
 127.292222 35.962778 355.307583 
 127.292222 35.962889 358.112231 
 127.292333 35.962889 355.884192 
 127.292333 35.963000 359.011715 
 127.292333 35.963111 363.888530 
 127.292444 35.963111 362.924626 
 127.292444 35.963222 372.616225 
 127.292444 35.963333 377.808777 
 127.292444 35.963444 380.300883 
 127.292556 35.963444 374.074335 
 127.292556 35.963556 377.656316 
 127.292556 35.963667 381.817652 
 127.292667 35.963667 369.688857 
 127.292667 35.963778 381.038579 
 127.292667 35.963889 389.501190 
 127.292778 35.963889 383.627608 
 127.292778 35.964000 386.328732 
 127.292778 35.964111 387.272219 
 127.292889 35.964111 384.440066 
 127.292889 35.964222 384.512733 
 127.292889 35.964333 383.976684 
 127.293000 35.964333 378.448501 
 127.293000 35.964444 373.594786 
 127.293000 35.964556 361.891545 
 127.293111 35.964667 342.144584 
 127.293111 35.964778 339.305924 
 127.293111 35.964889 338.991614 
 127.293222 35.964889 333.380177 
 127.293222 35.965000 333.384303 
 127.293222 35.965111 334.612099 
 127.293333 35.965111 331.899293 
 127.293333 35.965222 335.872902 
 127.293333 35.965333 350.351750 
 127.293444 35.965333 362.471731 
 127.293444 35.965445 378.748248 
 127.293444 35.965556 394.136452 
 127.293556 35.965556 386.038856 
 127.293556 35.965667 398.474240 
 127.293556 35.965778 410.288212 
 127.293667 35.965778 418.019493 
 127.293667 35.965889 428.833756 
 127.293667 35.966000 432.591812 
 127.293778 35.966111 432.640340 
 127.293778 35.966222 434.959154 
 127.293778 35.966333 438.977900 
 127.293889 35.966333 437.757085 
 127.293889 35.966445 441.674100 
 127.293889 35.966556 444.845276 
 127.294000 35.966556 441.342992 
 127.294000 35.966667 443.178234 
 127.294000 35.966778 447.065695 
 127.294111 35.966778 438.955635 
 127.294111 35.966889 442.251727 
 127.294111 35.967000 446.316413 
 127.294222 35.967000 439.538448 
 127.294222 35.967111 442.667665 
 127.294222 35.967222 442.821062 
 127.294333 35.967222 445.943801 
 127.294333 35.967333 446.469741 
 127.294333 35.967445 446.574756 
 127.294444 35.967445 447.391114 
 127.294444 35.967556 446.773367 
 127.294444 35.967667 444.554410 
 127.294444 35.967778 439.278581 
 127.294556 35.967778 427.182624 
 127.294556 35.967889 411.933112 
 127.294556 35.968000 398.357680 
 127.294667 35.968000 390.303491 
 127.294667 35.968111 384.600482 
 127.294667 35.968222 381.708745 
 127.294778 35.968222 386.288291 
 127.294778 35.968333 381.501171 
 127.294778 35.968444 376.368139 
 127.294889 35.968444 373.239391 
 127.294889 35.968555 361.361708 
 127.294889 35.968667 353.488350 
 127.295000 35.968667 354.751060 
 127.295000 35.968778 350.083944 
 127.295000 35.968889 347.611409 
 127.295111 35.968889 352.005638 
 127.295111 35.969000 348.260484 
 127.295111 35.969111 345.758080 
 127.295111 35.969222 343.300869 
 127.295222 35.969222 344.575752 
 127.295222 35.969333 341.385962 
 127.295222 35.969444 335.744818 
 127.295333 35.969444 339.316466 
 127.295333 35.969555 331.109634 
 127.295333 35.969667 323.271610 
 127.295444 35.969667 326.358139 
 127.295444 35.969778 320.562624 
 127.295444 35.969889 316.751253 
 127.295556 35.969889 319.333390 
 127.295556 35.970000 316.881296 
 127.295556 35.970111 314.792874 
 127.295667 35.970111 317.037515 
 127.295667 35.970222 314.779184 
 127.295667 35.970333 309.844844 
 127.295778 35.970333 309.070905 
 127.295778 35.970444 299.155921 
 127.295778 35.970556 293.167645 
 127.295778 35.970667 290.952566 
 127.295889 35.970667 293.307113 
 127.295889 35.970778 293.016762 
 127.295889 35.970889 293.580588 
 127.296000 35.970889 301.752709 
 127.296000 35.971000 302.656676 
 127.296000 35.971111 302.685213 
 127.296111 35.971111 305.234736 
 127.296111 35.971222 303.758397 
 127.296111 35.971333 299.476172 
 127.296222 35.971333 298.626096 
 127.296222 35.971444 296.150943 
 127.296222 35.971556 294.834227 
 127.296333 35.971556 299.016601 
 127.296333 35.971667 296.215201 
 127.296333 35.971778 293.811615 
 127.296444 35.971778 299.542485 
 127.296444 35.971889 294.897477 
 127.296444 35.972000 291.181471 
 127.296444 35.972111 289.603886 
 127.296556 35.972111 300.695380 
 127.296556 35.972222 300.041101 
 127.296556 35.972333 298.938219 
 127.296667 35.972333 303.663379 
 127.296667 35.972444 301.616108 
 127.296667 35.972556 296.033199 
 127.296778 35.972556 293.891977 
 127.296778 35.972667 282.474303 
 127.296778 35.972778 264.346391 
 127.296889 35.972778 275.359293 
 127.296889 35.972889 261.902344 
 127.296889 35.973000 252.240961 
 127.297000 35.973000 278.255643 
 127.297000 35.973111 272.657599 
 127.297000 35.973222 264.920770 
 127.297111 35.973222 279.110347 
 127.297111 35.973333 275.317123 
 127.297111 35.973444 267.575978 
 127.297111 35.973556 254.803418 
 127.297222 35.973556 270.739050 
 127.297222 35.973667 256.592246 
 127.297222 35.973778 242.073479 
 127.297333 35.973778 264.182156 
 127.297333 35.973889 250.712001 
 127.297333 35.974000 240.671625 
 127.297444 35.974000 265.158880 
 127.297444 35.974111 257.101561 
 127.297444 35.974222 248.496278 
 127.297556 35.974222 268.586171 
 127.297556 35.974333 265.542887 
 127.297556 35.974444 262.096765 
 127.297667 35.974444 274.408906 
 127.297667 35.974556 273.970273 
 127.297667 35.974667 272.402981 
 127.297778 35.974778 274.326994 
 127.297778 35.974889 271.998380 
 127.297778 35.975000 267.767687 
 127.297889 35.975000 264.966400 
 127.297889 35.975111 262.187412 
 127.297889 35.975222 258.481691 
 127.298000 35.975222 258.001049 
 127.298000 35.975333 252.753003 
 127.298000 35.975444 243.841004 
 127.298111 35.975444 240.864685 
 127.298111 35.975556 233.777546 
 127.298111 35.975667 229.471723 
 127.298222 35.975667 227.212508 
 127.298222 35.975778 225.674412 
 127.298222 35.975889 222.885419 
 127.298333 35.975889 223.117680 
 127.298333 35.976000 216.795059 
 127.298333 35.976111 203.876237 
 127.298333 35.976222 186.382301 
 127.298444 35.976222 183.407114 
 127.298444 35.976333 174.716374 
 127.298444 35.976444 169.237425 
 127.298556 35.976444 176.883473 
 127.298556 35.976556 173.179769 
 127.298556 35.976667 169.151079 
 127.298667 35.976667 178.299681 
 127.298667 35.976778 169.877009 
 127.298667 35.976889 158.131721 
 127.298778 35.976889 165.527253 
 127.298778 35.977000 156.339619 
 127.298778 35.977111 146.371929 
 127.298889 35.977111 160.716737 
 127.298889 35.977222 155.579660 
 127.298889 35.977333 146.737163 
 127.299000 35.977333 151.655883 
 127.299000 35.977445 142.123890 
 127.299000 35.977556 130.458591 
 127.299000 35.977667 123.062579 
 127.299111 35.977667 123.305288 
 127.299111 35.977778 120.493166 
 127.299111 35.977889 119.686889 
 127.299222 35.977889 119.676206 
 127.299222 35.978000 119.613295 
 127.299222 35.978111 119.826935 
 127.299333 35.978111 119.817964 
 127.299333 35.978222 120.269407 
 127.299333 35.978333 120.983519 
 127.299444 35.978333 120.868110 
 127.299444 35.978445 121.120679 
 127.299444 35.978556 121.398448 
 127.299556 35.978556 120.897103 
 127.299556 35.978667 120.978805 
 127.299556 35.978778 121.173390 
 127.299667 35.978889 121.163974 
 127.299667 35.979000 121.738085 
 127.299667 35.979111 122.879198 
 127.299778 35.979111 122.601731 
 127.299778 35.979222 124.222529 
 127.299778 35.979333 125.602451 
 127.299889 35.979333 123.973384 
 127.299889 35.979445 125.619591 
 127.299889 35.979556 127.190166 
 127.300000 35.979556 124.779241 
 127.300000 35.979667 126.987332 
 127.300000 35.979778 129.990756 
 127.300111 35.979778 125.175455 
 127.300111 35.979889 128.125414 
 127.300111 35.980000 133.710480 
 127.300222 35.980000 127.841544 
 127.300222 35.980111 134.300338 
 127.300222 35.980222 144.995476 
 127.300222 35.980333 155.496996 
 127.300333 35.980333 143.249105 
 127.300333 35.980444 154.545122 
 127.300333 35.980555 166.226069 
 127.300444 35.980555 154.356174 
 127.300444 35.980667 170.286330 
 127.300444 35.980778 183.132444 
 127.300556 35.980778 166.981581 
 127.300556 35.980889 175.228096 
 127.300556 35.981000 185.613900 
 127.300667 35.981000 180.465977 
 127.300667 35.981111 190.926496 
 127.300667 35.981222 201.637484 
 127.300778 35.981222 200.177949 
 127.300778 35.981333 205.208821 
 127.300778 35.981444 211.513520 
 127.300889 35.981444 210.066295 
 127.300889 35.981555 224.281790 
 127.300889 35.981667 239.464922 
 127.300889 35.981778 247.654670 
 127.301000 35.981778 247.128335 
 127.301000 35.981889 254.338423 
 127.301000 35.982000 260.500025 
 127.301111 35.982000 268.754412 
 127.301111 35.982111 276.037121 
 127.301111 35.982222 278.876056 
 127.301222 35.982222 277.233150 
 127.301222 35.982333 277.833304 
 127.301222 35.982444 277.245401 
 127.301333 35.982444 264.023647 
 127.301333 35.982555 263.501613 
 127.301333 35.982667 262.985454 
 127.301444 35.982667 259.616248 
 127.301444 35.982778 257.433365 
 127.301444 35.982889 251.951459 
 127.301444 35.983000 244.403829 
 127.301556 35.983000 237.109210 
 127.301556 35.983111 234.278481 
 127.301556 35.983222 234.243052 
 127.301667 35.983222 233.058692 
 127.301667 35.983333 234.963881 
 127.301667 35.983444 239.445572 
 127.301778 35.983444 233.205118 
 127.301778 35.983556 237.998465 
 127.301778 35.983667 241.975721 
 127.301889 35.983667 221.289553 
 127.301889 35.983778 219.784313 
 127.301889 35.983889 219.197114 
 127.302000 35.983889 212.754056 
 127.302000 35.984000 211.477862 
 127.302000 35.984111 209.247438 
 127.302111 35.984222 194.476118 
 127.302111 35.984333 192.326967 
 127.302111 35.984444 192.887340 
 127.302222 35.984444 188.769873 
 127.302222 35.984556 189.691462 
 127.302222 35.984667 191.888766 
 127.302333 35.984667 190.172814 
 127.302333 35.984778 196.401662 
 127.302333 35.984889 203.995632 
 127.302444 35.984889 204.167009 
 127.302444 35.985000 209.208086 
 127.302444 35.985111 211.430211 
 127.302556 35.985111 210.994892 
 127.302556 35.985222 213.965768 
 127.302556 35.985333 219.242558 
 127.302667 35.985333 228.123814 
 127.302667 35.985444 242.026385 
 127.302667 35.985556 252.813303 
 127.302667 35.985667 258.667096 
 127.302778 35.985667 260.980062 
 127.302778 35.985778 266.533157 
 127.302778 35.985889 271.409056 
 127.302889 35.985889 284.252775 
 127.302889 35.986000 287.918748 
 127.302889 35.986111 291.665022 
 127.303000 35.986111 291.993952 
 127.303000 35.986222 294.804650 
 127.303000 35.986333 302.843955 
 127.303111 35.986333 309.662692 
 127.303111 35.986444 329.119880 
 127.303111 35.986556 345.662270 
 127.303222 35.986556 346.776543 
 127.303222 35.986667 354.172996 
 127.303222 35.986778 356.736231 
 127.303222 35.986889 357.716148 
 127.303333 35.986889 355.495282 
 127.303333 35.987000 358.153874 
 127.303333 35.987111 360.388540 
 127.303444 35.987111 360.775129 
 127.303444 35.987222 362.359145 
 127.303444 35.987333 362.851801 
 127.303556 35.987333 362.099443 
 127.303556 35.987444 361.844445 
 127.303556 35.987556 361.239492 
 127.303667 35.987556 356.566918 
 127.303667 35.987667 355.481829 
 127.303667 35.987778 352.243882 
 127.303778 35.987778 339.452941 
 127.303778 35.987889 331.011365 
 127.303778 35.988000 321.109849 
 127.303889 35.988000 311.564225 
 127.303889 35.988111 308.474204 
 127.303889 35.988222 307.608085 
 127.303889 35.988333 307.081413 
 127.304000 35.988333 304.992869 
 127.304000 35.988444 302.926901 
 127.304000 35.988556 297.247670 
 127.304111 35.988556 288.695477 
 127.304111 35.988667 278.211601 
 127.304111 35.988778 270.188454 
 127.304222 35.988778 264.113804 
 127.304222 35.988889 260.056629 
 127.304222 35.989000 256.068937 
 127.304333 35.989000 240.906355 
 127.304333 35.989111 235.755315 
 127.304333 35.989222 228.457929 
 127.304444 35.989222 232.576636 
 127.304444 35.989333 226.849985 
 127.304444 35.989444 220.255186 
 127.304444 35.989556 216.593051 
 127.304556 35.989556 210.793967 
 127.304556 35.989667 212.096796 
 127.304556 35.989778 216.366074 
 127.304667 35.989778 208.783143 
 127.304667 35.989889 215.276905 
 127.304667 35.990000 228.569724 
 127.304778 35.990000 239.017153 
 127.304778 35.990111 249.098615 
 127.304778 35.990222 257.562066 
 127.304889 35.990222 250.052883 
 127.304889 35.990333 255.753516 
 127.304889 35.990445 262.750764 
 127.305000 35.990445 274.244280 
 127.305000 35.990556 287.661755 
 127.305000 35.990667 300.998529 
 127.305000 35.990778 309.074116 
 127.305111 35.990778 307.432123 
 127.305111 35.990889 312.744642 
 127.305111 35.991000 316.082611 
 127.305222 35.991000 317.326056 
 127.305222 35.991111 325.546614 
 127.305222 35.991222 334.506089 
 127.305333 35.991222 333.557547 
 127.305333 35.991333 338.973774 
 127.305333 35.991445 340.822015 
 127.305444 35.991445 333.584586 
 127.305444 35.991556 335.939220 
 127.305444 35.991667 338.310117 
 127.305556 35.991667 342.605913 
 127.305556 35.991778 349.157812 
 127.305556 35.991889 353.120627 
 127.305667 35.991889 354.121647 
 127.305667 35.992000 356.732196 
 127.305667 35.992111 357.663589 
 127.305667 35.992222 357.073574 
 127.305778 35.992222 357.539686 
 127.305778 35.992333 358.005707 
 127.305778 35.992445 357.653953 
 127.305889 35.992445 359.717908 
 127.305889 35.992556 360.904714 
 127.305889 35.992667 361.746883 
 127.306000 35.992667 361.951639 
 127.306000 35.992778 363.670953 
 127.306000 35.992889 365.450832 
 127.306111 35.992889 370.763580 
 127.306111 35.993000 371.247105 
 127.306111 35.993111 371.631777 
 127.306222 35.993111 378.320646 
 127.306222 35.993222 377.671607 
 127.306222 35.993333 379.002907 
 127.306222 35.993444 384.232289 
 127.306333 35.993444 400.909696 
 127.306333 35.993555 407.529810 
 127.306333 35.993667 417.866632 
 127.306444 35.993667 420.807452 
 127.306444 35.993778 429.254915 
 127.306444 35.993889 434.260801 
 127.306556 35.993889 448.028262 
 127.306556 35.994000 450.470869 
 127.306556 35.994111 453.503654 
 127.306667 35.994111 456.121876 
 127.306667 35.994222 460.009548 
 127.306667 35.994333 466.112429 
 127.306778 35.994333 465.338243 
 127.306778 35.994444 470.766742 
 127.306778 35.994555 474.820369 
 127.306778 35.994667 478.267908 
 127.306889 35.994667 486.961761 
 127.306889 35.994778 488.923535 
 127.306889 35.994889 491.166340 
 127.307000 35.994889 491.031951 
 127.307000 35.995000 492.149043 
 127.307000 35.995111 495.940321 
 127.307111 35.995111 498.817096 
 127.307111 35.995222 509.709592 
 127.307111 35.995333 526.479484 
 127.307222 35.995333 534.625190 
 127.307222 35.995444 543.923287 
 127.307222 35.995556 547.855635 
 127.307333 35.995556 559.458565 
 127.307333 35.995667 562.980593 
 127.307333 35.995778 565.645328 
 127.307444 35.995778 570.331395 
 127.307444 35.995889 572.327059 
 127.307444 35.996000 574.837392 
 127.307444 35.996111 578.887549 
 127.307556 35.996111 574.482306 
 127.307556 35.996222 576.576330 
 127.307556 35.996333 577.790381 
 127.307667 35.996333 576.249545 
 127.307667 35.996444 575.408926 
 127.307667 35.996556 575.053442 
 127.307778 35.996556 574.178021 
 127.307778 35.996667 573.914397 
 127.307778 35.996778 573.424368 
 127.307889 35.996778 568.430161 
 127.307889 35.996889 567.560728 
 127.307889 35.997000 565.789260 
 127.308000 35.997000 547.410721 
 127.308000 35.997111 546.363196 
 127.308000 35.997222 546.322118 
 127.308000 35.997333 547.532959 
 127.308111 35.997333 530.849329 
 127.308111 35.997444 534.014488 
 127.308111 35.997556 539.599430 
 127.308222 35.997556 528.589255 
 127.308222 35.997667 535.157819 
 127.308222 35.997778 542.399781 
 127.308333 35.997778 539.706730 
 127.308333 35.997889 548.761767 
 127.308333 35.998000 553.782163 
 127.308444 35.998000 555.928151 
 127.308444 35.998111 558.803956 
 127.308444 35.998222 558.962614 
 127.308556 35.998222 560.204924 
 127.308556 35.998333 560.853807 
 127.308556 35.998444 560.941380 
 127.308556 35.998556 561.262128 
 127.308667 35.998556 561.466206 
 127.308667 35.998667 564.782819 
 127.308667 35.998778 569.977466 
 127.308778 35.998778 570.702853 
 127.308778 35.998889 581.738552 
 127.308778 35.999000 588.375332 
 127.308889 35.999000 590.120936 
 127.308889 35.999111 593.740343 
 127.308889 35.999222 594.015557 
 127.309000 35.999222 590.252115 
 127.309000 35.999333 586.396490 
 127.309000 35.999444 579.163653 
 127.309111 35.999444 561.204000 
 127.309111 35.999556 554.651410 
 127.309111 35.999667 550.795753 
 127.309111 35.999778 547.368125 
 127.309222 35.999778 549.211949 
 127.309222 35.999889 544.661701 
 127.309222 36.000000 533.862078 
 127.309333 36.000000 522.456486 
 127.309333 36.000111 505.412383 
 127.309333 36.000222 495.151065 
 127.309444 36.000222 499.401769 
 127.309444 36.000333 490.943788 
 127.309444 36.000444 486.823140 
 127.309556 36.000444 483.855011 
 127.309556 36.000556 479.490385 
 127.309556 36.000667 476.880567 
 127.309667 36.000667 480.892993 
 127.309667 36.000778 476.201927 
 127.309667 36.000889 472.139591 
 127.309667 36.001000 465.471251 
 127.309778 36.001000 459.847840 
 127.309778 36.001111 455.876720 
 127.309778 36.001222 448.648779 
 127.309889 36.001222 446.757391 
 127.309889 36.001333 436.541677 
 127.309889 36.001444 423.645363 
 127.310000 36.001444 417.584952 
 127.310000 36.001556 413.552063 
 127.310000 36.001667 410.340566 
 127.310111 36.001667 409.345413 
 127.310111 36.001778 404.121224 
 127.310111 36.001889 394.069263 
 127.310222 36.001889 393.503205 
 127.310222 36.002000 385.815459 
 127.310222 36.002111 378.243853 
 127.310222 36.002222 373.947462 
 127.310333 36.002222 372.465738 
 127.310333 36.002333 370.218619 
 127.310333 36.002444 369.344336 
 127.310444 36.002444 372.316199 
 127.310444 36.002556 371.711034 
 127.310444 36.002667 371.620251 
 127.310556 36.002667 383.898319 
 127.310556 36.002778 383.224847 
 127.310556 36.002889 382.096119 
 127.310667 36.002889 386.104297 
 127.310667 36.003000 385.026009 
 127.310667 36.003111 382.988890 
 127.310778 36.003111 383.067949 
 127.310778 36.003222 377.388684 
 127.310778 36.003333 368.104788 
 127.310778 36.003445 356.393351 
 127.310889 36.003445 342.363309 
 127.310889 36.003556 339.065191 
 127.310889 36.003667 335.841300 
 127.311000 36.003667 337.834177 
 127.311000 36.003778 335.866541 
 127.311000 36.003889 330.431433 
 127.311111 36.003889 334.475776 
 127.311111 36.004000 331.425200 
 127.311111 36.004111 328.700377 
 127.311222 36.004111 332.420988 
 127.311222 36.004222 331.452737 
 127.311222 36.004333 330.240644 
 127.311333 36.004333 333.824213 
 127.311333 36.004445 331.256440 
 127.311333 36.004556 327.514991 
 127.311333 36.004667 323.783776 
 127.311444 36.004667 327.102873 
 127.311444 36.004778 324.719005 
 127.311444 36.004889 323.084987 
 127.311556 36.004889 324.986357 
 127.311556 36.005000 319.501574 
 127.311556 36.005111 312.040824 
 127.311667 36.005111 303.924705 
 127.311667 36.005222 296.693239 
 127.311667 36.005333 293.517912 
 127.311778 36.005333 290.838385 
 127.311778 36.005444 287.960459 
 127.311778 36.005555 286.402196 
 127.311889 36.005555 279.524949 
 127.311889 36.005667 278.909155 
 127.311889 36.005778 278.659245 
 127.311889 36.005889 279.256266 
 127.312000 36.005889 272.167431 
 127.312000 36.006000 273.043777 
 127.312000 36.006111 275.425256 
 127.312111 36.006111 272.497376 
 127.312111 36.006222 274.734180 
 127.312111 36.006333 276.690094 
 127.312222 36.006333 275.849327 
 127.312222 36.006444 277.743507 
 127.312222 36.006555 282.186807 
 127.312333 36.006555 281.785020 
 127.312333 36.006667 290.038845 
 127.312333 36.006778 302.435371 
 127.312444 36.006778 291.138506 
 127.312444 36.006889 299.608727 
 127.312444 36.007000 309.814081 
 127.312444 36.007111 319.337357 
 127.312556 36.007111 312.056391 
 127.312556 36.007222 327.928151 
 127.312556 36.007333 337.549968 
 127.312667 36.007333 340.681109 
 127.312667 36.007444 346.979768 
 127.312667 36.007555 349.580073 
 127.312778 36.007555 350.195884 
 127.312778 36.007667 352.224016 
 127.312778 36.007778 353.828600 
 127.312889 36.007778 352.322837 
 127.312889 36.007889 354.416826 
 127.312889 36.008000 358.701828 
 127.313000 36.008000 357.565869 
 127.313000 36.008111 368.196776 
 127.313000 36.008222 382.714326 
 127.313000 36.008333 393.904276 
 127.313111 36.008333 387.804893 
 127.313111 36.008444 395.287924 
 127.313111 36.008556 400.129424 
 127.313222 36.008556 391.424230 
 127.313222 36.008667 398.009985 
 127.313222 36.008778 403.808930 
 127.313333 36.008778 402.837618 
 127.313333 36.008889 409.367269 
 127.313333 36.009000 415.790500 
 127.313444 36.009000 411.757044 
 127.313444 36.009111 416.401112 
 127.313444 36.009222 422.042837 
 127.313556 36.009222 417.781227 
 127.313556 36.009333 424.042925 
 127.313556 36.009444 432.104611 
 127.313556 36.009556 440.983646 
 127.313667 36.009556 441.917668 
 127.313667 36.009667 451.145275 
 127.313667 36.009778 458.832701 
 127.313778 36.009778 454.609211 
 127.313778 36.009889 461.076072 
 127.313778 36.010000 465.128241 
 127.313889 36.010000 466.164638 
 127.313889 36.010111 469.371152 
 127.313889 36.010222 472.936063 
 127.314000 36.010222 478.112206 
 127.314000 36.010333 484.737445 
 127.314000 36.010444 489.413266 
 127.314111 36.010444 496.762689 
 127.314111 36.010556 499.361497 
 127.314111 36.010667 499.831041 
 127.314111 36.010778 498.508777 
 127.314222 36.010778 501.272813 
 127.314222 36.010889 498.485906 
 127.314222 36.011000 491.886147 
 127.314333 36.011000 486.875885 
 127.314333 36.011111 472.460281 
 127.314333 36.011222 459.471173 
 127.314444 36.011222 456.653138 
 127.314444 36.011333 448.394393 
 127.314444 36.011444 444.523523 
 127.314556 36.011444 447.511042 
 127.314556 36.011556 443.721376 
 127.314556 36.011667 439.220153 
 127.314667 36.011667 447.056996 
 127.314667 36.011778 437.007364 
 127.314667 36.011889 422.025196 
 127.314667 36.012000 406.688735 
 127.314778 36.012000 421.507939 
 127.314778 36.012111 402.689547 
 127.314778 36.012222 385.557863 
 127.314889 36.012222 410.290452 
 127.314889 36.012333 387.925906 
 127.314889 36.012444 370.116000 
 127.315000 36.012444 380.859563 
 127.315000 36.012556 362.159498 
 127.315000 36.012667 352.420129 
 127.315111 36.012667 364.288601 
 127.315111 36.012778 354.008920 
 127.315111 36.012889 347.779112 
 127.315222 36.012889 365.501852 
 127.315222 36.013000 356.695760 
 127.315222 36.013111 349.633408 
 127.315333 36.013111 367.149447 
 127.315333 36.013222 363.202294 
 127.315333 36.013333 357.323436 
 127.315333 36.013444 349.976418 
 127.315444 36.013444 365.905555 
 127.315444 36.013556 358.125392 
 127.315444 36.013667 352.140437 
 127.315556 36.013667 367.523213 
 127.315556 36.013778 361.166989 
 127.315556 36.013889 355.055776 
 127.315667 36.013889 365.360115 
 127.315667 36.014000 357.049566 
 127.315667 36.014111 345.648605 
 127.315778 36.014111 346.735755 
 127.315778 36.014222 339.436555 
 127.315778 36.014333 328.885171 
 127.315889 36.014333 331.993121 
 127.315889 36.014444 318.575322 
 127.315889 36.014556 305.403981 
 127.315889 36.014667 298.204912 
 127.316000 36.014667 301.408084 
 127.316000 36.014778 297.939378 
 127.316000 36.014889 298.007389 
 127.316111 36.014889 310.755836 
 127.316111 36.015000 312.693209 
 127.316111 36.015111 314.126520 
 127.316222 36.015111 315.662161 
 127.316222 36.015222 317.009821 
 127.316222 36.015333 317.569839 
 127.316333 36.015333 319.611731 
 127.316333 36.015445 320.388700 
 127.316333 36.015556 319.034708 
 127.316444 36.015556 321.316835 
 127.316444 36.015667 317.584380 
 127.316444 36.015778 307.149776 
 127.316444 36.015889 288.547410 
 127.316556 36.015889 274.047783 
 127.316556 36.016000 267.080040 
 127.316556 36.016111 264.360055 
 127.316667 36.016111 264.231303 
 127.316667 36.016222 262.585499 
 127.316667 36.016333 259.475554 
 127.316778 36.016333 255.533717 
 127.316778 36.016445 252.736499 
 127.316778 36.016556 252.105833 
 127.316889 36.016556 251.898289 
 127.316889 36.016667 252.810513 
 127.316889 36.016778 255.938850 
 127.317000 36.016778 267.031010 
 127.317000 36.016889 280.384422 
 127.317000 36.017000 290.806505 
 127.317000 36.017111 296.327885 
 127.317111 36.017111 296.199393 
 127.317111 36.017222 298.655669 
 127.317111 36.017333 301.377681 
 127.317222 36.017333 299.819274 
 127.317222 36.017445 304.113301 
 127.317222 36.017556 312.211101 
 127.317333 36.017556 315.414565 
 127.317333 36.017667 327.391924 
 127.317333 36.017778 338.163289 
 127.317444 36.017778 335.095629 
 127.317444 36.017889 339.054228 
 127.317444 36.018000 342.272040 
 127.317556 36.018000 337.490350 
 127.317556 36.018111 340.144766 
 127.317556 36.018222 345.400776 
 127.317667 36.018333 351.700721 
 127.317667 36.018444 358.679466 
 127.317667 36.018555 362.738775 
 127.317778 36.018555 357.485901 
 127.317778 36.018667 360.241817 
 127.317778 36.018778 363.393543 
 127.317889 36.018778 358.201029 
 127.317889 36.018889 362.524888 
 127.317889 36.019000 370.543933 
 127.318000 36.019000 357.569141 
 127.318000 36.019111 373.978441 
 127.318000 36.019222 397.213699 
 127.318111 36.019222 389.870233 
 127.318111 36.019333 404.603459 
 127.318111 36.019444 413.169083 
 127.318222 36.019444 396.710081 
 127.318222 36.019555 405.846497 
 127.318222 36.019667 414.262401 
 127.318222 36.019778 419.613598 
 127.318333 36.019778 427.514754 
 127.318333 36.019889 430.719147 
 127.318333 36.020000 430.264338 
 127.318444 36.020000 438.472669 
 127.318444 36.020111 436.840931 
 127.318444 36.020222 431.627511 
 127.318556 36.020222 442.976250 
 127.318556 36.020333 437.211817 
 127.318556 36.020444 430.668572 
 127.318667 36.020444 438.766383 
 127.318667 36.020555 435.735992 
 127.318667 36.020667 430.558115 
 127.318778 36.020667 432.718951 
 127.318778 36.020778 423.312090 
 127.318778 36.020889 409.005215 
 127.318778 36.021000 397.311859 
 127.318889 36.021000 396.949232 
 127.318889 36.021111 392.784098 
 127.318889 36.021222 385.249474 
 127.319000 36.021222 386.693689 
 127.319000 36.021333 372.970574 
 127.319000 36.021444 353.893451 
 127.319111 36.021444 350.973482 
 127.319111 36.021556 337.492280 
 127.319111 36.021667 333.342004 
 127.319222 36.021667 340.522595 
 127.319222 36.021778 340.072508 
 127.319222 36.021889 342.467964 
 127.319333 36.021889 355.947618 
 127.319333 36.022000 356.422987 
 127.319333 36.022111 356.534722 
 127.319444 36.022222 358.551709 
 127.319444 36.022333 358.274605 
 127.319444 36.022444 356.474158 
 127.319556 36.022444 369.937400 
 127.319556 36.022556 369.243569 
 127.319556 36.022667 364.550487 
 127.319667 36.022667 373.497122 
 127.319667 36.022778 370.437637 
 127.319667 36.022889 362.487021 
 127.319778 36.022889 363.342957 
 127.319778 36.023000 350.846996 
 127.319778 36.023111 337.650507 
 127.319889 36.023111 341.767336 
 127.319889 36.023222 333.344922 
 127.319889 36.023333 329.992069 
 127.320000 36.023333 331.899996 
 127.320000 36.023444 330.749542 
 127.320000 36.023556 332.133925 
 127.320000 36.023667 336.139244 
 127.320111 36.023667 351.156805 
 127.320111 36.023778 357.994518 
 127.320111 36.023889 362.268454 
 127.320222 36.023889 363.906835 
 127.320222 36.024000 365.251051 
 127.320222 36.024111 366.277115 
 127.320333 36.024111 367.852110 
 127.320333 36.024222 371.100671 
 127.320333 36.024333 377.006485 
 127.320444 36.024333 389.588733 
 127.320444 36.024444 394.524350 
 127.320444 36.024556 397.502656 
 127.320556 36.024556 399.565957 
 127.320556 36.024667 401.465815 
 127.320556 36.024778 405.805960 
 127.320556 36.024889 414.806255 
 127.320667 36.024889 416.698095 
 127.320667 36.025000 423.003086 
 127.320667 36.025111 426.152856 
 127.320778 36.025111 428.024464 
 127.320778 36.025222 431.133730 
 127.320778 36.025333 435.928628 
 127.320889 36.025333 451.884405 
 127.320889 36.025444 464.848968 
 127.320889 36.025556 475.715475 
 127.321000 36.025556 474.800240 
 127.321000 36.025667 481.845300 
 127.321000 36.025778 485.271094 
 127.321111 36.025778 481.118414 
 127.321111 36.025889 483.993315 
 127.321111 36.026000 487.558176 
 127.321222 36.026000 483.633162 
 127.321222 36.026111 493.132789 
 127.321222 36.026222 508.305820 
 127.321222 36.026333 518.289305 
 127.321333 36.026333 528.467853 
 127.321333 36.026444 531.626371 
 127.321333 36.026556 531.846874 
 127.321444 36.026556 535.941102 
 127.321444 36.026667 535.817748 
 127.321444 36.026778 534.293599 
 127.321556 36.026778 533.024732 
 127.321556 36.026889 528.516712 
 127.321556 36.027000 519.999398 
 127.321667 36.027000 500.363937 
 127.321667 36.027111 491.228987 
 127.321667 36.027222 486.611780 
 127.321778 36.027222 483.544104 
 127.321778 36.027333 481.940121 
 127.321778 36.027444 480.268659 
 127.321889 36.027444 479.463750 
 127.321889 36.027556 474.662910 
 127.321889 36.027667 463.934573 
 127.321889 36.027778 450.306735 
 127.322000 36.027778 438.949384 
 127.322000 36.027889 435.251699 
 127.322000 36.028000 434.110831 
 127.322111 36.028000 433.447709 
 127.322111 36.028111 431.332444 
 127.322111 36.028222 429.666137 
 127.322222 36.028222 416.579669 
 127.322222 36.028333 415.383456 
 127.322222 36.028445 417.780083 
 127.322333 36.028445 410.509621 
 127.322333 36.028556 411.843409 
 127.322333 36.028667 413.938716 
 127.322444 36.028667 411.103362 
 127.322444 36.028778 412.543172 
 127.322444 36.028889 413.352644 
 127.322556 36.028889 409.532216 
 127.322556 36.029000 410.695391 
 127.322556 36.029111 410.513755 
 127.322556 36.029222 408.776397 
 127.322667 36.029222 405.635565 
 127.322667 36.029333 404.183559 
 127.322667 36.029445 400.468457 
 127.322778 36.029445 394.068475 
 127.322778 36.029556 386.508524 
 127.322778 36.029667 380.605071 
 127.322889 36.029667 378.035476 
 127.322889 36.029778 377.105923 
 127.322889 36.029889 376.394660 
 127.323000 36.029889 373.577257 
 127.323000 36.030000 370.157153 
 127.323000 36.030111 363.108770 
 127.323111 36.030111 349.262349 
 127.323111 36.030222 344.114607 
 127.323111 36.030333 341.249953 
 127.323222 36.030333 340.754212 
 127.323222 36.030444 338.689646 
 127.323222 36.030555 336.014563 
 127.323222 36.030667 331.044665 
 127.323333 36.030667 325.827737 
 127.323333 36.030778 319.799021 
 127.323333 36.030889 312.125547 
 127.323444 36.030889 305.189447 
 127.323444 36.031000 297.135975 
 127.323444 36.031111 292.424804 
 127.323556 36.031111 291.880528 
 127.323556 36.031222 290.168256 
 127.323556 36.031333 289.781278 
 127.323667 36.031333 292.000082 
 127.323667 36.031444 292.630206 
 127.323667 36.031555 294.504181 
 127.323778 36.031555 301.462028 
 127.323778 36.031667 302.701133 
 127.323778 36.031778 303.446315 
 127.323889 36.031778 307.036932 
 127.323889 36.031889 306.378008 
 127.323889 36.032000 306.068529 
 127.323889 36.032111 304.990700 
 127.324000 36.032111 320.309270 
 127.324000 36.032222 319.959066 
 127.324000 36.032333 316.953168 
 127.324111 36.032333 324.861671 
 127.324111 36.032444 321.503215 
 127.324111 36.032555 312.919894 
 127.324222 36.032555 314.178408 
 127.324222 36.032667 302.610805 
 127.324222 36.032778 293.285299 
 127.324333 36.032778 292.550091 
 127.324333 36.032889 290.543189 
 127.324333 36.033000 289.516658 
 127.324444 36.033000 291.514921 
 127.324444 36.033111 291.672054 
 127.324444 36.033222 293.501879 
 127.324556 36.033333 298.226315 
 127.324556 36.033444 300.737862 
 127.324556 36.033556 302.126300 
 127.324667 36.033556 307.491151 
 127.324667 36.033667 306.890237 
 127.324667 36.033778 305.724990 
 127.324778 36.033778 307.912697 
 127.324778 36.033889 303.395299 
 127.324778 36.034000 297.471495 
 127.324889 36.034000 294.568704 
 127.324889 36.034111 286.901745 
 127.324889 36.034222 283.486930 
 127.325000 36.034222 287.483356 
 127.325000 36.034333 284.082583 
 127.325000 36.034444 282.149829 
 127.325111 36.034444 289.361969 
 127.325111 36.034556 283.408667 
 127.325111 36.034667 277.103527 
 127.325111 36.034778 268.662979 
 127.325222 36.034778 279.295603 
 127.325222 36.034889 272.228521 
 127.325222 36.035000 264.321285 
 127.325333 36.035000 274.925210 
 127.325333 36.035111 271.111129 
 127.325333 36.035222 268.295685 
 127.325444 36.035222 272.106173 
 127.325444 36.035333 270.944004 
 127.325444 36.035444 268.343681 
 127.325556 36.035444 273.028817 
 127.325556 36.035556 267.673081 
 127.325556 36.035667 259.654838 
 127.325667 36.035667 267.711086 
 127.325667 36.035778 259.767538 
 127.325667 36.035889 256.186784 
 127.325778 36.035889 261.790971 
 127.325778 36.036000 257.700549 
 127.325778 36.036111 255.743522 
 127.325778 36.036222 254.473028 
 127.325889 36.036222 254.875956 
 127.325889 36.036333 251.043008 
 127.325889 36.036444 248.262676 
 127.326000 36.036444 250.826940 
 127.326000 36.036556 247.562728 
 127.326000 36.036667 245.760127 
 127.326111 36.036667 251.656334 
 127.326111 36.036778 244.012579 
 127.326111 36.036889 238.858754 
 127.326222 36.036889 240.116138 
 127.326222 36.037000 235.899938 
 127.326222 36.037111 234.320795 
 127.326333 36.037111 238.971168 
 127.326333 36.037222 237.231538 
 127.326333 36.037333 236.309219 
 127.326333 36.037444 236.863737 
 127.326444 36.037444 235.015729 
 127.326444 36.037556 231.874066 
 127.326444 36.037667 232.773402 
 127.326556 36.037667 228.535436 
 127.326556 36.037778 230.246391 
 127.326556 36.037889 236.210148 
 127.326667 36.037889 232.820236 
 127.326667 36.038000 238.665724 
 127.326667 36.038111 249.389387 
 127.326778 36.038111 242.957077 
 127.326778 36.038222 250.567404 
 127.326778 36.038333 260.282616 
 127.326889 36.038333 244.668618 
 127.326889 36.038444 249.291376 
 127.326889 36.038556 256.326927 
 127.327000 36.038556 243.879086 
 127.327000 36.038667 249.431239 
 127.327000 36.038778 259.851456 
 127.327000 36.038889 272.189199 
 127.327111 36.038889 255.415603 
 127.327111 36.039000 266.756097 
 127.327111 36.039111 277.346254 
 127.327222 36.039111 258.795611 
 127.327222 36.039222 265.786551 
 127.327222 36.039333 273.974352 
 127.327333 36.039333 260.613909 
 127.327333 36.039444 264.069921 
 127.327333 36.039556 270.177097 
 127.327444 36.039556 264.632249 
 127.327444 36.039667 271.343787 
 127.327444 36.039778 282.433671 
 127.327556 36.039778 281.349969 
 127.327556 36.039889 286.465933 
 127.327556 36.040000 291.355680 
 127.327556 36.040111 298.315745 
 127.327667 36.040111 292.339520 
 127.327667 36.040222 300.473926 
 127.327667 36.040333 311.050853 
 127.327778 36.040333 308.058472 
 127.327778 36.040445 314.369498 
 127.327778 36.040556 317.604869 
 127.327889 36.040556 312.147311 
 127.327889 36.040667 316.240087 
 127.327889 36.040778 321.363356 
 127.328000 36.040778 311.653830 
 127.328000 36.040889 322.462841 
 127.328000 36.041000 332.728254 
 127.328111 36.041000 329.043492 
 127.328111 36.041111 334.598568 
 127.328111 36.041222 337.092118 
 127.328111 36.041333 338.648861 
 127.328222 36.041333 335.793776 
 127.328222 36.041445 336.265109 
 127.328222 36.041556 335.682537 
 127.328333 36.041556 327.212039 
 127.328333 36.041667 324.785987 
 127.328333 36.041778 321.856995 
 127.328444 36.041778 321.962013 
 127.328444 36.041889 320.924172 
 127.328444 36.042000 319.109770 
 127.328556 36.042000 316.578983 
 127.328556 36.042111 314.573720 
 127.328556 36.042222 309.774840 
 127.328667 36.042222 294.525583 
 127.328667 36.042333 284.901978 
 127.328667 36.042445 269.982133 
 127.328778 36.042556 258.423647 
 127.328778 36.042667 255.290677 
 127.328778 36.042778 254.332052 
 127.328889 36.042778 249.612923 
 127.328889 36.042889 247.866004 
 127.328889 36.043000 244.226668 
 127.329000 36.043000 227.934402 
 127.329000 36.043111 219.955933 
 127.329000 36.043222 213.014811 
 127.329111 36.043222 208.910848 
 127.329111 36.043333 206.065589 
 127.329111 36.043444 204.866655 
 127.329222 36.043444 202.461119 
 127.329222 36.043555 200.850577 
 127.329222 36.043667 198.250298 
 127.329333 36.043667 186.115729 
 127.329333 36.043778 185.130399 
 127.329333 36.043889 184.416173 
 127.329333 36.044000 183.851205 
 127.329444 36.044000 184.150238 
 127.329444 36.044111 184.187647 
 127.329444 36.044222 184.416891 
 127.329556 36.044222 190.165518 
 127.329556 36.044333 193.428271 
 127.329556 36.044444 196.339925 
 127.329667 36.044444 206.433389 
 127.329667 36.044555 206.397935 
 127.329667 36.044667 204.748089 
 127.329778 36.044667 208.651978 
 127.329778 36.044778 208.353443 
 127.329778 36.044889 207.398404 
 127.329889 36.044889 216.647600 
 127.329889 36.045000 217.244420 
 127.329889 36.045111 216.263005 
 127.329889 36.045222 213.098721 
 127.330000 36.045222 218.720870 
 127.330000 36.045333 215.628059 
 127.330000 36.045444 208.572233 
 127.330111 36.045444 205.737295 
 127.330111 36.045555 196.952618 
 127.330111 36.045667 191.272484 
 127.330222 36.045667 195.744804 
 127.330222 36.045778 192.282124 
 127.330222 36.045889 190.774786 
 127.330333 36.045889 196.513121 
 127.330333 36.046000 195.144792 
 127.330333 36.046111 195.188381 
 127.330444 36.046111 205.582077 
 127.330444 36.046222 206.865702 
 127.330444 36.046333 210.401218 
 127.330556 36.046444 206.565881 
 127.330556 36.046556 211.517784 
 127.330556 36.046667 214.513236 
 127.330667 36.046667 203.278965 
 127.330667 36.046778 207.477161 
 127.330667 36.046889 212.341825 
 127.330778 36.046889 204.096060 
 127.330778 36.047000 207.890642 
 127.330778 36.047111 214.691130 
 127.330889 36.047111 205.406661 
 127.330889 36.047222 213.595054 
 127.330889 36.047333 228.376163 
 127.331000 36.047333 217.947380 
 127.331000 36.047444 231.273461 
 127.331000 36.047556 245.577991 
 127.331111 36.047556 222.035096 
 127.331111 36.047667 232.229025 
 127.331111 36.047778 244.401468 
 127.331111 36.047889 253.371926 
 127.331222 36.047889 236.674966 
 127.331222 36.048000 242.968094 
 127.331222 36.048111 247.258193 
 127.331333 36.048111 239.184049 
 127.331333 36.048222 241.381830 
 127.331333 36.048333 242.750773 
 127.331444 36.048333 238.185851 
 127.331444 36.048444 237.555088 
 127.331444 36.048556 236.253345 
 127.331556 36.048556 232.417743 
 127.331556 36.048667 232.685279 
 127.331556 36.048778 232.832727 
 127.331667 36.048778 229.561895 
 127.331667 36.048889 230.117699 
 127.331667 36.049000 229.627465 
 127.331667 36.049111 228.824061 
 127.331778 36.049111 210.430908 
 127.331778 36.049222 209.961757 
 127.331778 36.049333 211.230864 
 127.331889 36.049333 206.553176 
 127.331889 36.049444 207.888593 
 127.331889 36.049556 209.214755 
 127.332000 36.049556 207.142519 
 127.332000 36.049667 207.110478 
 127.332000 36.049778 206.827830 
 127.332111 36.049778 196.985001 
 127.332111 36.049889 195.738940 
 127.332111 36.050000 192.615894 
 127.332222 36.050000 184.783605 
 127.332222 36.050111 179.855013 
 127.332222 36.050222 177.445630 
 127.332333 36.050222 173.727694 
 127.332333 36.050333 178.112120 
 127.332333 36.050444 188.519674 
 127.332333 36.050556 200.370555 
 127.332444 36.050556 196.801683 
 127.332444 36.050667 199.861216 
 127.332444 36.050778 201.724453 
 127.332556 36.050778 199.341413 
 127.332556 36.050889 202.157252 
 127.332556 36.051000 204.059652 
 127.332667 36.051000 198.864557 
 127.332667 36.051111 198.598844 
 127.332667 36.051222 195.290784 
 127.332778 36.051222 183.948622 
 127.332778 36.051333 178.616088 
 127.332778 36.051444 174.535664 
 127.332889 36.051444 177.264105 
 127.332889 36.051556 172.742277 
 127.332889 36.051667 169.182828 
 127.332889 36.051778 166.198819 
 127.333000 36.051778 156.882003 
 127.333000 36.051889 155.502412 
 127.333000 36.052000 154.902047 
 127.333111 36.052000 154.553849 
 127.333111 36.052111 155.537658 
 127.333111 36.052222 156.871444 
 127.333222 36.052222 162.714201 
 127.333222 36.052333 164.248872 
 127.333222 36.052444 164.470314 
 127.333333 36.052444 167.815655 
 127.333333 36.052556 167.681979 
 127.333333 36.052667 166.627208 
 127.333444 36.052667 176.389145 
 127.333444 36.052778 175.758461 
 127.333444 36.052889 171.150226 
 127.333556 36.052889 184.891696 
 127.333556 36.053000 177.496097 
 127.333556 36.053111 164.380296 
 127.333556 36.053222 153.006121 
 127.333667 36.053222 168.608540 
 127.333667 36.053333 157.924039 
 127.333667 36.053445 153.234738 
 127.333778 36.053445 167.072039 
 127.333778 36.053556 165.166657 
 127.333778 36.053667 166.388325 
 127.333889 36.053667 168.788480 
 127.333889 36.053778 171.316610 
 127.333889 36.053889 174.988740 
 127.334000 36.053889 182.862871 
 127.334000 36.054000 191.152998 
 127.334000 36.054111 198.199408 
 127.334111 36.054111 200.949906 
 127.334111 36.054222 204.480829 
 127.334111 36.054333 206.785126 
 127.334111 36.054445 209.101284 
 127.334222 36.054445 206.797410 
 127.334222 36.054556 208.632687 
 127.334222 36.054667 211.124946 
 127.334333 36.054667 220.455936 
 127.334333 36.054778 222.438304 
 127.334333 36.054889 222.421998 
 127.334444 36.054889 229.355716 
 127.334444 36.055000 227.868762 
 127.334444 36.055111 226.154671 
 127.334556 36.055111 233.231057 
 127.334556 36.055222 230.563633 
 127.334556 36.055333 226.363870 
 127.334667 36.055333 235.747543 
 127.334667 36.055444 226.705380 
 127.334667 36.055556 218.780338 
 127.334667 36.055667 215.023409 
 127.334778 36.055667 223.895663 
 127.334778 36.055778 223.374641 
 127.334778 36.055889 223.781595 
 127.334889 36.055889 227.461601 
 127.334889 36.056000 229.779499 
 127.334889 36.056111 234.154173 
 127.335000 36.056111 242.439712 
 127.335000 36.056222 246.275401 
 127.335000 36.056333 249.249890 
 127.335111 36.056333 252.992369 
 127.335111 36.056444 256.035704 
 127.335111 36.056555 262.167752 
 127.335222 36.056555 267.180148 
 127.335222 36.056667 271.107908 
 127.335222 36.056778 273.785065 
 127.335333 36.056778 273.580430 
 127.335333 36.056889 275.076620 
 127.335333 36.057000 277.730783 
 127.335333 36.057111 282.790869 
 127.335444 36.057111 304.499284 
 127.335444 36.057222 310.996273 
 127.335444 36.057333 316.552046 
 127.335556 36.057333 323.248905 
 127.335556 36.057444 326.174098 
 127.335556 36.057555 329.434953 
 127.335667 36.057555 329.855525 
 127.335667 36.057667 333.047271 
 127.335667 36.057778 334.529661 
 127.335778 36.057778 346.377662 
 127.335778 36.057889 345.426399 
 127.335778 36.058000 342.876908 
 127.335889 36.058000 350.216623 
 127.335889 36.058111 349.556137 
 127.335889 36.058222 347.005727 
 127.336000 36.058222 359.732574 
 127.336000 36.058333 355.622111 
 127.336000 36.058444 348.222647 
 127.336000 36.058556 344.371983 
 127.336111 36.058556 372.033555 
 127.336111 36.058667 372.509199 
 127.336111 36.058778 374.161295 
 127.336222 36.058778 377.486883 
 127.336222 36.058889 377.987077 
 127.336222 36.059000 378.976280 
 127.336333 36.059000 380.695403 
 127.336333 36.059111 378.969893 
 127.336333 36.059222 373.907763 
 127.336444 36.059222 382.383378 
 127.336444 36.059333 378.780880 
 127.336444 36.059444 372.327757 
 127.336556 36.059444 379.903115 
 127.336556 36.059556 373.812146 
 127.336556 36.059667 359.280460 
 127.336667 36.059778 343.560776 
 127.336667 36.059889 322.725528 
 127.336667 36.060000 304.288967 
 127.336778 36.060000 318.439623 
 127.336778 36.060111 297.921357 
 127.336778 36.060222 273.624191 
 127.336889 36.060222 282.891474 
 127.336889 36.060333 264.335786 
 127.336889 36.060444 255.869666 
 127.337000 36.060444 263.247158 
 127.337000 36.060556 256.848983 
 127.337000 36.060667 253.917298 
 127.337111 36.060667 259.418245 
 127.337111 36.060778 254.604812 
 127.337111 36.060889 250.973383 
 127.337222 36.060889 256.925111 
 127.337222 36.061000 251.451719 
 127.337222 36.061111 249.782525 
 127.337333 36.061222 258.596930 
 127.337333 36.061333 259.174533 
 127.337333 36.061444 259.952582 
 127.337444 36.061444 264.966014 
 127.337444 36.061556 266.067643 
 127.337444 36.061667 269.807541 
 127.337556 36.061667 278.038859 
 127.337556 36.061778 285.822035 
 127.337556 36.061889 293.112281 
 127.337667 36.061889 296.953476 
 127.337667 36.062000 298.737702 
 127.337667 36.062111 299.615403 
 127.337778 36.062111 299.918931 
 127.337778 36.062222 301.484818 
 127.337778 36.062333 301.469300 
 127.337889 36.062333 297.257506 
 127.337889 36.062444 296.182436 
 127.337889 36.062556 290.810006 
 127.338000 36.062556 273.022832 
 127.338000 36.062667 260.629903 
 127.338000 36.062778 243.564806 
 127.338000 36.062889 230.617833 
 127.338111 36.062889 238.456920 
 127.338111 36.063000 226.757025 
 127.338111 36.063111 219.576970 
 127.338222 36.063111 217.744635 
 127.338222 36.063222 209.815661 
 127.338222 36.063333 203.928243 
 127.338333 36.063333 207.180018 
 127.338333 36.063444 202.932102 
 127.338333 36.063556 196.931112 
 127.338444 36.063556 199.207166 
 127.338444 36.063667 187.909539 
 127.338444 36.063778 172.725868 
 127.338556 36.063778 177.147099 
 127.338556 36.063889 163.398740 
 127.338556 36.064000 156.302523 
 127.338667 36.064000 161.334134 
 127.338667 36.064111 153.847033 
 127.338667 36.064222 151.662430 
 127.338667 36.064333 150.998543 
 127.338778 36.064333 150.849005 
 127.338778 36.064444 150.058004 
 127.338778 36.064556 148.926280 
 127.338889 36.064556 146.638628 
 127.338889 36.064667 144.188372 
 127.338889 36.064778 142.690346 
 127.339000 36.064778 142.622973 
 127.339000 36.064889 141.852945 
 127.339000 36.065000 141.307857 
 127.339111 36.065000 140.677684 
 127.339111 36.065111 138.556374 
 127.339111 36.065222 137.146370 
 127.339222 36.065222 136.990414 
 127.339222 36.065333 136.256585 
 127.339222 36.065445 136.127950 
 127.339333 36.065445 137.036030 
 127.339333 36.065556 136.989568 
 127.339333 36.065667 137.956551 
 127.339333 36.065778 140.327789 
 127.339444 36.065778 141.078602 
 127.339444 36.065889 144.330262 
 127.339444 36.066000 148.109365 
 127.339556 36.066000 143.338275 
 127.339556 36.066111 149.977880 
 127.339556 36.066222 157.977520 
 127.339667 36.066222 146.569286 
 127.339667 36.066333 154.762379 
 127.339667 36.066445 162.398911 
 127.339778 36.066445 149.804036 
 127.339778 36.066556 154.418260 
 127.339778 36.066667 159.309195 
 127.339889 36.066667 150.797572 
 127.339889 36.066778 154.477477 
 127.339889 36.066889 160.893501 
 127.340000 36.066889 155.276150 
 127.340000 36.067000 159.241677 
 127.340000 36.067111 162.961420 
 127.340111 36.067222 159.633566 
 127.340111 36.067333 160.774454 
 127.340111 36.067445 162.399575 
 127.340222 36.067445 159.151477 
 127.340222 36.067556 160.844890 
 127.340222 36.067667 163.030988 
 127.340333 36.067667 158.720854 
 127.340333 36.067778 161.696585 
 127.340333 36.067889 163.489782 
 127.340444 36.067889 158.820485 
 127.340444 36.068000 161.943495 
 127.340444 36.068111 164.838605 
 127.340556 36.068111 156.664607 
 127.340556 36.068222 161.846070 
 127.340556 36.068333 165.289269 
 127.340667 36.068333 159.059951 
 127.340667 36.068444 163.182314 
 127.340667 36.068555 164.936270 
 127.340778 36.068555 159.801320 
 127.340778 36.068667 162.510087 
 127.340778 36.068778 163.562050 
 127.340778 36.068889 164.035623 
 127.340889 36.068889 161.209503 
 127.340889 36.069000 162.005682 
 127.340889 36.069111 163.267235 
 127.341000 36.069111 155.154848 
 127.341000 36.069222 157.016861 
 127.341000 36.069333 159.544938 
 127.341111 36.069333 156.663842 
 127.341111 36.069444 158.442560 
 127.341111 36.069555 159.830434 
 127.341222 36.069555 157.749081 
 127.341222 36.069667 160.185380 
 127.341222 36.069778 163.519377 
 127.341333 36.069778 162.690570 
 127.341333 36.069889 166.193221 
 127.341333 36.070000 168.168027 
 127.341444 36.070000 165.979327 
 127.341444 36.070111 167.520352 
 127.341444 36.070222 169.154346 
 127.341444 36.070333 171.339522 
 127.341556 36.070333 166.919498 
 127.341556 36.070444 168.409489 
 127.341556 36.070555 169.077192 
 127.341667 36.070555 162.856555 
 127.341667 36.070667 163.140958 
 127.341667 36.070778 163.538028 
 127.341778 36.070778 159.837180 
 127.341778 36.070889 160.239343 
 127.341778 36.071000 161.590141 
 127.341889 36.071000 158.357991 
 127.341889 36.071111 159.792780 
 127.341889 36.071222 162.984241 
 127.342000 36.071222 160.417674 
 127.342000 36.071333 163.427914 
 127.342000 36.071444 168.573863 
 127.342111 36.071444 167.613431 
 127.342111 36.071556 172.178197 
 127.342111 36.071667 175.838309 
 127.342111 36.071778 177.368943 
 127.342222 36.071778 177.110142 
 127.342222 36.071889 177.343341 
 127.342222 36.072000 177.196580 
 127.342333 36.072000 175.843873 
 127.342333 36.072111 175.543058 
 127.342333 36.072222 175.696018 
 127.342444 36.072222 175.184965 
 127.342444 36.072333 175.638114 
 127.342444 36.072444 177.080975 
 127.342556 36.072444 176.745501 
 127.342556 36.072556 178.743825 
 127.342556 36.072667 182.712195 
 127.342667 36.072667 182.736388 
 127.342667 36.072778 185.027250 
 127.342667 36.072889 189.885622 
 127.342778 36.072889 186.336459 
 127.342778 36.073000 191.927370 
 127.342778 36.073111 203.339065 
 127.342778 36.073222 216.613405 
 127.342889 36.073222 212.980519 
 127.342889 36.073333 223.751345 
 127.342889 36.073444 229.599570 
 127.343000 36.073444 230.267355 
 127.343000 36.073556 236.972267 
 127.343000 36.073667 241.192698 
 127.343111 36.073667 251.867190 
 127.343111 36.073778 253.886109 
 127.343111 36.073889 255.315204 
 127.343222 36.073889 257.674489 
 127.343222 36.074000 259.827564 
 127.343222 36.074111 263.681963 
 127.343333 36.074111 270.573274 
 127.343333 36.074222 273.810490 
 127.343333 36.074333 277.816716 
 127.343444 36.074333 278.453170 
 127.343444 36.074444 284.749247 
 127.343444 36.074556 295.160610 
 127.343444 36.074667 301.555096 
 127.343556 36.074667 305.110086 
 127.343556 36.074778 307.166937 
 127.343556 36.074889 307.852889 
 127.343667 36.074889 309.882214 
 127.343667 36.075000 312.012964 
 127.343667 36.075111 316.291483 
 127.343778 36.075111 318.428413 
 127.343778 36.075222 324.042232 
 127.343778 36.075333 326.629604 
 127.343889 36.075333 326.529503 
 127.343889 36.075444 327.749147 
 127.343889 36.075556 328.958296 
 127.344000 36.075556 330.657696 
 127.344000 36.075667 336.778374 
 127.344000 36.075778 344.651242 
 127.344000 36.075889 348.804428 
 127.344111 36.075889 349.620026 
 127.344111 36.076000 350.383222 
 127.344111 36.076111 350.075940 
 127.344222 36.076111 349.005137 
 127.344222 36.076222 348.842605 
 127.344222 36.076333 347.458336 
 127.344333 36.076333 346.359535 
 127.344333 36.076444 346.313491 
 127.344333 36.076556 345.242394 
 127.344444 36.076556 344.117979 
 127.344444 36.076667 341.295368 
 127.344444 36.076778 337.288858 
 127.344556 36.076778 335.826110 
 127.344556 36.076889 334.333582 
 127.344556 36.077000 331.622072 
 127.344667 36.077000 333.775935 
 127.344667 36.077111 329.877616 
 127.344667 36.077222 322.405459 
 127.344667 36.077333 315.022287 
 127.344778 36.077333 315.066629 
 127.344778 36.077444 313.322483 
 127.344778 36.077556 312.896542 
 127.344889 36.077556 315.184923 
 127.344889 36.077667 316.161153 
 127.344889 36.077778 319.584652 
 127.345000 36.077778 331.953696 
 127.345000 36.077889 336.337772 
 127.345000 36.078000 338.998600 
 127.345111 36.078000 341.448535 
 127.345111 36.078111 341.655191 
 127.345111 36.078222 341.842493 
 127.345222 36.078222 344.036373 
 127.345222 36.078333 344.562403 
 127.345222 36.078445 345.428759 
 127.345222 36.078556 346.008949 
 127.345333 36.078556 347.595041 
 127.345333 36.078667 347.140097 
 127.345333 36.078778 346.487264 
 127.345444 36.078778 347.053333 
 127.345444 36.078889 345.593447 
 127.345444 36.079000 343.000689 
 127.345556 36.079000 343.510339 
 127.345556 36.079111 340.822708 
 127.345556 36.079222 339.103799 
 127.345667 36.079222 341.351335 
 127.345667 36.079333 340.119008 
 127.345667 36.079445 340.117919 
 127.345667 36.079556 340.608978 
 127.345778 36.079556 343.344694 
 127.345778 36.079667 344.343808 
 127.345778 36.079778 344.614129 
 127.345889 36.079778 340.955117 
 127.345889 36.079889 340.056150 
 127.345889 36.080000 338.373273 
 127.346000 36.080000 328.318019 
 127.346000 36.080111 327.333889 
 127.346000 36.080222 325.205377 
 127.346000 36.080333 320.191267 
 127.346111 36.080333 317.566537 
 127.346111 36.080444 309.125964 
 127.346111 36.080556 303.245753 
 127.346222 36.080556 299.370060 
 127.346222 36.080667 297.397748 
 127.346222 36.080778 296.435071 
 127.346333 36.080778 287.672924 
 127.346333 36.080889 286.333861 
 127.346333 36.081000 285.869541 
 127.346333 36.081111 285.348804 
 127.346444 36.081111 282.829964 
 
