# Supplementary material for: Terrain Referenced Navigation Using a Multilayer Radial Basis Function-Based Extreme Learning Machine
Source: Hindawi journal article supplement (doi:10.1155/2019/9142694), 2019-07-11
Supplement: f1 [file 9142694.f1.zip › 9142694_Supplementary information files/CompareMatchingResults_180909/ANNTrainResult.dat]

127.173333 35.703000 347.457170 
 127.173444 35.703000 347.822988 
 127.173556 35.703000 349.265630 
 127.173667 35.703000 354.596134 
 127.173889 35.703000 375.476919 
 127.174111 35.703000 380.990351 
 127.174222 35.703000 385.515045 
 127.174333 35.703000 388.462782 
 127.174444 35.703000 390.447283 
 127.173444 35.703222 348.338647 
 127.173556 35.703222 350.343669 
 127.173667 35.703222 357.041766 
 127.173778 35.703222 369.485646 
 127.174000 35.703222 377.644478 
 127.174222 35.703222 384.975930 
 127.174333 35.703222 387.746590 
 127.174444 35.703222 389.091927 
 127.174556 35.703222 391.889813 
 127.173556 35.703445 353.651411 
 127.173667 35.703445 362.679953 
 127.173778 35.703445 372.799212 
 127.173889 35.703445 376.284249 
 127.174111 35.703445 380.220912 
 127.174333 35.703445 387.522496 
 127.174444 35.703445 388.686675 
 127.174556 35.703445 390.298145 
 127.174667 35.703445 395.121242 
 127.173667 35.703778 373.040055 
 127.173778 35.703778 375.863978 
 127.173889 35.703778 376.599187 
 127.174000 35.703778 377.385826 
 127.174222 35.703778 384.098672 
 127.174444 35.703778 388.445106 
 127.174556 35.703778 389.125649 
 127.174667 35.703778 391.334166 
 127.174778 35.703778 396.367403 
 127.173778 35.704000 376.368819 
 127.173889 35.704000 376.628761 
 127.174000 35.704000 377.297230 
 127.174111 35.704000 379.511299 
 127.174333 35.704000 387.135392 
 127.174556 35.704000 388.898241 
 127.174667 35.704000 390.491736 
 127.174778 35.704000 395.248710 
 127.174889 35.704000 398.377629 
 127.173889 35.700556 414.505023 
 127.174000 35.700556 414.875643 
 127.174111 35.700556 416.867439 
 127.174222 35.700556 422.191488 
 127.174444 35.700556 424.982195 
 127.174667 35.700556 406.465889 
 127.174778 35.700556 403.426343 
 127.174889 35.700556 403.359155 
 127.175000 35.700556 403.904502 
 127.173889 35.700667 414.500112 
 127.174000 35.700667 414.855179 
 127.174111 35.700667 416.786256 
 127.174222 35.700667 422.142071 
 127.174444 35.700667 425.089584 
 127.174667 35.700667 407.318185 
 127.174778 35.700667 403.716008 
 127.174889 35.700667 403.666880 
 127.175000 35.700667 404.590010 
 127.173889 35.700778 414.504465 
 127.174000 35.700778 414.876422 
 127.174111 35.700778 416.888600 
 127.174222 35.700778 422.368890 
 127.174444 35.700778 425.328674 
 127.174667 35.700778 409.129118 
 127.174778 35.700778 404.394543 
 127.174889 35.700778 404.249038 
 127.175000 35.700778 405.516411 
 127.174000 35.700778 414.876422 
 127.174111 35.700778 416.888600 
 127.174222 35.700778 422.368890 
 127.174333 35.700778 425.115184 
 127.174556 35.700778 422.572587 
 127.174778 35.700778 404.394543 
 127.174889 35.700778 404.249038 
 127.175000 35.700778 405.516411 
 127.175111 35.700778 406.685562 
 127.174000 35.700889 414.961661 
 127.174111 35.700889 417.271715 
 127.174222 35.700889 423.040521 
 127.174333 35.700889 425.638503 
 127.174556 35.700889 424.081619 
 127.174778 35.700889 405.939536 
 127.174889 35.700889 405.246513 
 127.175000 35.700889 406.473683 
 127.175111 35.700889 406.781190 
 127.174000 35.701000 415.179634 
 127.174111 35.701000 418.188929 
 127.174222 35.701000 424.446028 
 127.174333 35.701000 426.712722 
 127.174556 35.701000 426.121731 
 127.174778 35.701000 409.099521 
 127.174889 35.701000 406.719997 
 127.175000 35.701000 407.161046 
 127.175111 35.701000 406.249261 
 127.174000 35.701111 415.726906 
 127.174111 35.701111 420.185686 
 127.174222 35.701111 426.896031 
 127.174333 35.701111 428.582548 
 127.174556 35.701111 428.333205 
 127.174778 35.701111 414.270128 
 127.174889 35.701111 408.578077 
 127.175000 35.701111 407.385816 
 127.175111 35.701111 405.080509 
 127.174111 35.701111 420.185686 
 127.174222 35.701111 426.896031 
 127.174333 35.701111 428.582548 
 127.174444 35.701111 428.462298 
 127.174667 35.701111 423.987800 
 127.174889 35.701111 408.578077 
 127.175000 35.701111 407.385816 
 127.175111 35.701111 405.080509 
 127.175222 35.701111 400.222400 
 127.174111 35.701222 423.943124 
 127.174222 35.701222 430.198680 
 127.174333 35.701222 431.101352 
 127.174444 35.701222 430.562192 
 127.174667 35.701222 428.042653 
 127.174889 35.701222 410.642156 
 127.175000 35.701222 407.075857 
 127.175111 35.701222 403.338613 
 127.175222 35.701222 398.378237 
 127.174111 35.701333 429.123280 
 127.174222 35.701333 433.373145 
 127.174333 35.701333 433.567572 
 127.174444 35.701333 432.518300 
 127.174667 35.701333 429.990555 
 127.174889 35.701333 412.823851 
 127.175000 35.701333 406.204379 
 127.175111 35.701333 401.219581 
 127.175222 35.701333 396.831264 
 127.174111 35.701445 433.596294 
 127.174222 35.701445 435.533001 
 127.174333 35.701445 435.297256 
 127.174444 35.701445 433.757150 
 127.174667 35.701445 430.604111 
 127.174889 35.701445 415.032710 
 127.175000 35.701445 404.813972 
 127.175111 35.701445 399.069110 
 127.175222 35.701445 395.557123 
 127.174222 35.701445 435.533001 
 127.174333 35.701445 435.297256 
 127.174444 35.701445 433.757150 
 127.174556 35.701445 431.551509 
 127.174778 35.701445 427.560169 
 127.175000 35.701445 404.813972 
 127.175111 35.701445 399.069110 
 127.175222 35.701445 395.557123 
 127.175333 35.701445 393.640578 
 127.174222 35.701556 436.644390 
 127.174333 35.701556 436.118356 
 127.174444 35.701556 433.979609 
 127.174556 35.701556 431.070352 
 127.174778 35.701556 428.490837 
 127.175000 35.701556 403.183415 
 127.175111 35.701556 397.195268 
 127.175222 35.701556 394.326104 
 127.175333 35.701556 392.138208 
 127.174222 35.701667 437.021948 
 127.174333 35.701667 436.027618 
 127.174444 35.701667 432.742659 
 127.174556 35.701667 429.159434 
 127.174778 35.701667 427.690451 
 127.175000 35.701667 401.990187 
 127.175111 35.701667 395.685916 
 127.175222 35.701667 392.772168 
 127.175333 35.701667 389.902969 
 127.174222 35.701778 436.772074 
 127.174333 35.701778 434.659746 
 127.174444 35.701778 429.031010 
 127.174556 35.701778 424.665212 
 127.174778 35.701778 424.603147 
 127.175000 35.701778 402.168117 
 127.175111 35.701778 394.513625 
 127.175222 35.701778 390.642336 
 127.175333 35.701778 387.301823 
 127.174333 35.701889 430.947109 
 127.174444 35.701889 421.856185 
 127.174556 35.701889 417.146167 
 127.174667 35.701889 419.033303 
 127.174889 35.701889 413.789215 
 127.175111 35.701889 393.838948 
 127.175222 35.701889 388.275226 
 127.175333 35.701889 385.283925 
 127.175444 35.701889 384.451642 
 127.174333 35.702000 423.666808 
 127.174444 35.702000 412.808637 
 127.174556 35.702000 409.218679 
 127.174667 35.702000 411.688241 
 127.174889 35.702000 411.932446 
 127.175111 35.702000 394.105243 
 127.175222 35.702000 386.661890 
 127.175333 35.702000 384.547156 
 127.175444 35.702000 385.289253 
 127.174333 35.702111 413.958518 
 127.174444 35.702111 405.708992 
 127.174556 35.702111 404.014486 
 127.174667 35.702111 406.523053 
 127.174889 35.702111 411.060479 
 127.175111 35.702111 395.446129 
 127.175222 35.702111 386.449849 
 127.175333 35.702111 385.183913 
 127.175444 35.702111 387.434565 
 127.174333 35.702222 405.910772 
 127.174444 35.702222 401.924296 
 127.174556 35.702222 401.589059 
 127.174667 35.702222 404.114320 
 127.174889 35.702222 410.742368 
 127.175111 35.702222 397.511328 
 127.175222 35.702222 387.643480 
 127.175333 35.702222 387.194973 
 127.175444 35.702222 391.019239 
 127.174444 35.702222 401.924296 
 127.174556 35.702222 401.589059 
 127.174667 35.702222 404.114320 
 127.174778 35.702222 408.740816 
 127.175000 35.702222 408.634996 
 127.175222 35.702222 387.643480 
 127.175333 35.702222 387.194973 
 127.175444 35.702222 391.019239 
 127.175556 35.702222 397.907530 
 127.174444 35.702333 400.205284 
 127.174556 35.702333 400.602912 
 127.174667 35.702333 403.274180 
 127.174778 35.702333 408.263813 
 127.175000 35.702333 409.331950 
 127.175222 35.702333 390.157730 
 127.175333 35.702333 390.731409 
 127.175444 35.702333 395.962382 
 127.175556 35.702333 403.037486 
 127.174444 35.702445 399.248732 
 127.174556 35.702445 400.128370 
 127.174667 35.702445 403.085437 
 127.174778 35.702445 408.119433 
 127.175000 35.702445 409.788263 
 127.175222 35.702445 393.978540 
 127.175333 35.702445 395.737734 
 127.175444 35.702445 401.489635 
 127.175556 35.702445 407.229103 
 127.174444 35.702556 398.252479 
 127.174556 35.702556 399.675075 
 127.174667 35.702556 403.099623 
 127.174778 35.702556 407.981654 
 127.175000 35.702556 409.981524 
 127.175222 35.702556 398.809095 
 127.175333 35.702556 401.418398 
 127.175444 35.702556 406.329048 
 127.175556 35.702556 409.819913 
 127.174556 35.702556 399.675075 
 127.174667 35.702556 403.099623 
 127.174778 35.702556 407.981654 
 127.174889 35.702556 410.156446 
 127.175111 35.702556 405.001695 
 127.175333 35.702556 401.418398 
 127.175444 35.702556 406.329048 
 127.175556 35.702556 409.819913 
 127.175667 35.702556 410.456556 
 127.174556 35.702667 398.914163 
 127.174667 35.702667 403.066164 
 127.174778 35.702667 407.680620 
 127.174889 35.702667 409.625697 
 127.175111 35.702667 407.018306 
 127.175333 35.702667 406.427718 
 127.175444 35.702667 409.616358 
 127.175556 35.702667 410.764607 
 127.175667 35.702667 409.168462 
 127.174556 35.702778 397.633427 
 127.174667 35.702778 402.786205 
 127.174778 35.702778 407.172609 
 127.174889 35.702778 408.882073 
 127.175111 35.702778 408.140508 
 127.175333 35.702778 409.806824 
 127.175444 35.702778 411.264404 
 127.175556 35.702778 410.334183 
 127.175667 35.702778 407.071061 
 127.174556 35.702889 395.951899 
 127.174667 35.702889 402.152718 
 127.174778 35.702889 406.518368 
 127.174889 35.702889 408.036546 
 127.175111 35.702889 408.012521 
 127.175333 35.702889 411.507129 
 127.175444 35.702889 411.621542 
 127.175556 35.702889 408.930642 
 127.175667 35.702889 404.824375 
 127.174667 35.702889 402.152718 
 127.174778 35.702889 406.518368 
 127.174889 35.702889 408.036546 
 127.175000 35.702889 408.306970 
 127.175222 35.702889 409.545353 
 127.175444 35.702889 411.621542 
 127.175556 35.702889 408.930642 
 127.175667 35.702889 404.824375 
 127.175778 35.702889 401.664379 
 127.174667 35.703000 401.193835 
 127.174778 35.703000 405.779566 
 127.174889 35.703000 407.182710 
 127.175000 35.703000 407.090388 
 127.175222 35.703000 409.433975 
 127.175444 35.703000 410.992717 
 127.175556 35.703000 406.999352 
 127.175667 35.703000 402.815348 
 127.175778 35.703000 399.589977 
 127.174667 35.703111 399.964297 
 127.174778 35.703111 404.927714 
 127.174889 35.703111 406.290620 
 127.175000 35.703111 405.706637 
 127.175222 35.703111 407.482976 
 127.175444 35.703111 409.423695 
 127.175556 35.703111 404.822647 
 127.175667 35.703111 400.944977 
 127.175778 35.703111 397.008164 
 127.174667 35.703222 398.496298 
 127.174778 35.703222 403.875389 
 127.174889 35.703222 405.255533 
 127.175000 35.703222 404.214043 
 127.175222 35.703222 404.426975 
 127.175444 35.703222 406.487018 
 127.175556 35.703222 402.271456 
 127.175667 35.703222 398.739503 
 127.175778 35.703222 393.286591 
 127.174778 35.703222 403.875389 
 127.174889 35.703222 405.255533 
 127.175000 35.703222 404.214043 
 127.175111 35.703222 402.663907 
 127.175333 35.703222 407.928119 
 127.175556 35.703222 402.271456 
 127.175667 35.703222 398.739503 
 127.175778 35.703222 393.286591 
 127.175889 35.703222 384.039410 
 127.174778 35.703333 402.540106 
 127.174889 35.703333 403.995751 
 127.175000 35.703333 402.722072 
 127.175111 35.703333 401.133766 
 127.175333 35.703333 402.717589 
 127.175556 35.703333 398.574180 
 127.175667 35.703333 395.450976 
 127.175778 35.703333 388.246033 
 127.175889 35.703333 379.137641 
 127.174778 35.703445 400.915453 
 127.174889 35.703445 402.547614 
 127.175000 35.703445 401.403686 
 127.175111 35.703445 400.096790 
 127.175333 35.703445 395.851179 
 127.175556 35.703445 392.396495 
 127.175667 35.703445 390.329888 
 127.175778 35.703445 382.619652 
 127.175889 35.703445 375.497662 
 127.174778 35.703556 399.161410 
 127.174889 35.703556 401.118441 
 127.175000 35.703556 400.402791 
 127.175111 35.703556 399.402793 
 127.175333 35.703556 389.359944 
 127.175556 35.703556 383.520001 
 127.175667 35.703556 383.552222 
 127.175778 35.703556 377.639823 
 127.175889 35.703556 372.841074 
 127.174889 35.703556 401.118441 
 127.175000 35.703556 400.402791 
 127.175111 35.703556 399.402793 
 127.175222 35.703556 397.218361 
 127.175444 35.703556 381.828191 
 127.175667 35.703556 383.552222 
 127.175778 35.703556 377.639823 
 127.175889 35.703556 372.841074 
 127.176000 35.703556 369.888472 
 127.174889 35.703667 399.951375 
 127.175000 35.703667 399.722026 
 127.175111 35.703667 398.841344 
 127.175222 35.703667 395.506946 
 127.175444 35.703667 374.525961 
 127.175667 35.703667 376.766498 
 127.175778 35.703667 373.793175 
 127.175889 35.703667 370.345057 
 127.176000 35.703667 366.837790 
 127.174889 35.703778 399.162253 
 127.175000 35.703778 399.253415 
 127.175111 35.703778 398.185529 
 127.175222 35.703778 393.539255 
 127.175444 35.703778 370.976913 
 127.175667 35.703778 371.721438 
 127.175778 35.703778 370.653860 
 127.175889 35.703778 367.194721 
 127.176000 35.703778 362.649750 
 127.174889 35.703889 398.685817 
 127.175000 35.703889 398.824577 
 127.175111 35.703889 397.156842 
 127.175222 35.703889 391.129568 
 127.175444 35.703889 369.670281 
 127.175667 35.703889 368.627481 
 127.175778 35.703889 367.518152 
 127.175889 35.703889 363.087330 
 127.176000 35.703889 358.189338 
 127.175000 35.703889 398.824577 
 127.175111 35.703889 397.156842 
 127.175222 35.703889 391.129568 
 127.175333 35.703889 378.629726 
 127.175556 35.703889 367.739273 
 127.175778 35.703889 367.518152 
 127.175889 35.703889 363.087330 
 127.176000 35.703889 358.189338 
 127.176111 35.703889 354.772106 
 127.175000 35.704000 398.226337 
 127.175111 35.704000 395.462656 
 127.175222 35.704000 388.455034 
 127.175333 35.704000 377.531835 
 127.175556 35.704000 367.054360 
 127.175778 35.704000 364.158422 
 127.175889 35.704000 358.755725 
 127.176000 35.704000 354.788182 
 127.176111 35.704000 353.390717 
 127.175000 35.704111 397.208517 
 127.175111 35.704111 392.993460 
 127.175222 35.704111 386.023583 
 127.175333 35.704111 377.420418 
 127.175556 35.704111 366.968934 
 127.175778 35.704111 361.019987 
 127.175889 35.704111 355.350461 
 127.176000 35.704111 352.951934 
 127.176111 35.704111 353.384640 
 127.175000 35.704222 395.558419 
 127.175111 35.704222 390.127819 
 127.175222 35.704222 384.284499 
 127.175333 35.704222 377.929914 
 127.175556 35.704222 367.122144 
 127.175778 35.704222 358.780496 
 127.175889 35.704222 353.392398 
 127.176000 35.704222 352.407032 
 127.176111 35.704222 354.049557 
 127.175111 35.704222 390.127819 
 127.175222 35.704222 384.284499 
 127.175333 35.704222 377.929914 
 127.175444 35.704222 370.975679 
 127.175667 35.704222 365.097959 
 127.175889 35.704222 353.392398 
 127.176000 35.704222 352.407032 
 127.176111 35.704222 354.049557 
 127.176222 35.704222 355.706398 
 127.175111 35.704333 387.549399 
 127.175222 35.704333 383.246978 
 127.175333 35.704333 378.573275 
 127.175444 35.704333 371.995301 
 127.175667 35.704333 364.439058 
 127.175889 35.704333 352.768836 
 127.176000 35.704333 352.718239 
 127.176111 35.704333 354.897203 
 127.176222 35.704333 356.154169 
 127.175111 35.704444 385.650135 
 127.175222 35.704444 382.608966 
 127.175333 35.704444 378.848934 
 127.175444 35.704444 372.452004 
 127.175667 35.704444 363.435699 
 127.175889 35.704444 353.378253 
 127.176000 35.704444 353.636612 
 127.176111 35.704444 355.882088 
 127.176222 35.704444 356.629285 
 127.175111 35.704555 384.379902 
 127.175222 35.704555 381.991131 
 127.175333 35.704555 378.181355 
 127.175444 35.704555 371.384253 
 127.175667 35.704555 362.046494 
 127.175889 35.704555 355.180607 
 127.176000 35.704555 355.231502 
 127.176111 35.704555 357.453105 
 127.176222 35.704555 357.497650 
 127.175222 35.704555 381.991131 
 127.175333 35.704555 378.181355 
 127.175444 35.704555 371.384253 
 127.175556 35.704555 365.375822 
 127.175778 35.704555 358.813857 
 127.176000 35.704555 355.231502 
 127.176111 35.704555 357.453105 
 127.176222 35.704555 357.497650 
 127.176333 35.704555 353.604251 
 127.175222 35.704667 380.940448 
 127.175333 35.704667 375.909003 
 127.175444 35.704667 368.346154 
 127.175556 35.704667 363.049995 
 127.175778 35.704667 359.429098 
 127.176000 35.704667 357.658382 
 127.176111 35.704667 360.049687 
 127.176222 35.704667 358.954750 
 127.176333 35.704667 350.619784 
 127.175222 35.704778 378.878527 
 127.175333 35.704778 371.845105 
 127.175444 35.704778 364.597716 
 127.175556 35.704778 361.101834 
 127.175778 35.704778 359.663497 
 127.176000 35.704778 359.909034 
 127.176111 35.704778 362.539578 
 127.176222 35.704778 360.003486 
 127.176333 35.704778 347.849740 
 127.175222 35.704889 375.287302 
 127.175333 35.704889 367.084777 
 127.175444 35.704889 361.782274 
 127.175556 35.704889 360.009196 
 127.175778 35.704889 359.713296 
 127.176000 35.704889 359.980314 
 127.176111 35.704889 362.893419 
 127.176222 35.704889 359.129369 
 127.176333 35.704889 345.879842 
 127.175333 35.704889 367.084777 
 127.175444 35.704889 361.782274 
 127.175556 35.704889 360.009196 
 127.175667 35.704889 359.809433 
 127.175889 35.704889 359.005724 
 127.176111 35.704889 362.893419 
 127.176222 35.704889 359.129369 
 127.176333 35.704889 345.879842 
 127.176444 35.704889 342.693378 
 127.175333 35.705000 363.282938 
 127.175444 35.705000 360.227548 
 127.175556 35.705000 359.525912 
 127.175667 35.705000 359.721001 
 127.175889 35.705000 358.471199 
 127.176111 35.705000 359.956454 
 127.176222 35.705000 355.716882 
 127.176333 35.705000 344.292652 
 127.176444 35.705000 342.259137 
 127.175333 35.705111 361.002733 
 127.175444 35.705111 359.504345 
 127.175556 35.705111 359.391679 
 127.175667 35.705111 359.806671 
 127.175889 35.705111 357.309833 
 127.176111 35.705111 353.111114 
 127.176222 35.705111 349.864481 
 127.176333 35.705111 342.652364 
 127.176444 35.705111 341.384966 
 127.175333 35.705222 359.847770 
 127.175444 35.705222 359.230082 
 127.175556 35.705222 359.514838 
 127.175667 35.705222 360.099309 
 127.175889 35.705222 355.710794 
 127.176111 35.705222 344.383673 
 127.176222 35.705222 343.135449 
 127.176333 35.705222 340.573411 
 127.176444 35.705222 339.523807 
 127.175444 35.705222 359.230082 
 127.175556 35.705222 359.514838 
 127.175667 35.705222 360.099309 
 127.175778 35.705222 359.876754 
 127.176000 35.705222 344.826001 
 127.176222 35.705222 343.135449 
 127.176333 35.705222 340.573411 
 127.176444 35.705222 339.523807 
 127.176556 35.705222 337.057965 
 127.175444 35.705333 359.234193 
 127.175556 35.705333 359.904757 
 127.175667 35.705333 360.593877 
 127.175778 35.705333 360.183054 
 127.176000 35.705333 340.757373 
 127.176222 35.705333 338.243206 
 127.176333 35.705333 337.815986 
 127.176444 35.705333 336.362661 
 127.176556 35.705333 333.449381 
 127.175444 35.705444 359.495389 
 127.175556 35.705444 360.510993 
 127.175667 35.705444 361.115466 
 127.175778 35.705444 360.578345 
 127.176000 35.705444 339.086043 
 127.176222 35.705444 335.892506 
 127.176333 35.705444 334.810701 
 127.176444 35.705444 332.910914 
 127.176556 35.705444 330.591307 
 127.175444 35.705555 360.026350 
 127.175556 35.705555 361.102744 
 127.175667 35.705555 361.432865 
 127.175778 35.705555 360.787511 
 127.176000 35.705555 339.099684 
 127.176222 35.705555 335.139428 
 127.176333 35.705555 332.560611 
 127.176444 35.705555 330.621467 
 127.176556 35.705555 328.767166 
 127.175556 35.705555 361.102744 
 127.175667 35.705555 361.432865 
 127.175778 35.705555 360.787511 
 127.175889 35.705555 353.727608 
 127.176111 35.705555 336.148396 
 127.176333 35.705555 332.560611 
 127.176444 35.705555 330.621467 
 127.176556 35.705555 328.767166 
 127.176667 35.705555 325.445378 
 127.175556 35.705667 361.459518 
 127.175667 35.705667 361.429246 
 127.175778 35.705667 360.471733 
 127.175889 35.705667 353.975616 
 127.176111 35.705667 337.252197 
 127.176333 35.705667 331.429728 
 127.176444 35.705667 329.413471 
 127.176556 35.705667 327.240649 
 127.176667 35.705667 323.186443 
 127.175556 35.705778 361.511627 
 127.175667 35.705778 360.969615 
 127.175778 35.705778 359.229444 
 127.175889 35.705778 353.216439 
 127.176111 35.705778 339.587856 
 127.176333 35.705778 331.188085 
 127.176444 35.705778 328.558398 
 127.176556 35.705778 325.473236 
 127.176667 35.705778 321.089911 
 127.175556 35.705889 361.196546 
 127.175667 35.705889 359.766190 
 127.175778 35.705889 356.835342 
 127.175889 35.705889 351.503357 
 127.176111 35.705889 342.156703 
 127.176333 35.705889 331.660199 
 127.176444 35.705889 327.587506 
 127.176556 35.705889 323.438895 
 127.176667 35.705889 319.553948 
 127.175667 35.705889 359.766190 
 127.175778 35.705889 356.835342 
 127.175889 35.705889 351.503357 
 127.176000 35.705889 344.591480 
 127.176222 35.705889 339.306100 
 127.176444 35.705889 327.587506 
 127.176556 35.705889 323.438895 
 127.176667 35.705889 319.553948 
 127.176778 35.705889 318.194300 
 127.175667 35.706000 357.560540 
 127.175778 35.706000 353.884412 
 127.175889 35.706000 349.894765 
 127.176000 35.706000 345.506892 
 127.176222 35.706000 341.261466 
 127.176444 35.706000 326.421317 
 127.176556 35.706000 321.534654 
 127.176667 35.706000 318.801675 
 127.176778 35.706000 318.735136 
 127.175667 35.706111 354.727639 
 127.175778 35.706111 351.508776 
 127.175889 35.706111 348.953745 
 127.176000 35.706111 345.888377 
 127.176222 35.706111 341.901248 
 127.176444 35.706111 325.548955 
 127.176556 35.706111 320.327599 
 127.176667 35.706111 318.960998 
 127.176778 35.706111 320.230593 
 127.175667 35.706222 352.227598 
 127.175778 35.706222 350.118127 
 127.175889 35.706222 348.577838 
 127.176000 35.706222 346.203168 
 127.176222 35.706222 341.259978 
 127.176444 35.706222 325.963236 
 127.176556 35.706222 320.299107 
 127.176667 35.706222 320.198133 
 127.176778 35.706222 322.719797 
 127.175778 35.706222 350.118127 
 127.175889 35.706222 348.577838 
 127.176000 35.706222 346.203168 
 127.176111 35.706222 344.338732 
 127.176333 35.706222 334.429653 
 127.176556 35.706222 320.299107 
 127.176667 35.706222 320.198133 
 127.176778 35.706222 322.719797 
 127.176889 35.706222 325.861350 
 127.175778 35.706333 349.466375 
 127.175889 35.706333 348.621997 
 127.176000 35.706333 346.833795 
 127.176111 35.706333 344.337626 
 127.176333 35.706333 334.068012 
 127.176556 35.706333 321.770659 
 127.176667 35.706333 322.557042 
 127.176778 35.706333 325.629289 
 127.176889 35.706333 327.770042 
 127.175778 35.706444 349.270626 
 127.175889 35.706444 349.153356 
 127.176000 35.706444 348.186197 
 127.176111 35.706444 344.720662 
 127.176333 35.706444 333.572051 
 127.176556 35.706444 324.581344 
 127.176667 35.706444 325.527420 
 127.176778 35.706444 327.973374 
 127.176889 35.706444 328.259750 
 127.175778 35.706555 349.468639 
 127.175889 35.706555 350.347754 
 127.176000 35.706555 350.154569 
 127.176111 35.706555 345.802243 
 127.176333 35.706555 333.317446 
 127.176556 35.706555 327.726383 
 127.176667 35.706555 328.112323 
 127.176778 35.706555 329.163864 
 127.176889 35.706555 327.359437 
 127.175889 35.706555 350.347754 
 127.176000 35.706555 350.154569 
 127.176111 35.706555 345.802243 
 127.176222 35.706555 337.502183 
 127.176444 35.706555 331.467640 
 127.176667 35.706555 328.112323 
 127.176778 35.706555 329.163864 
 127.176889 35.706555 327.359437 
 127.177000 35.706555 321.917198 
 127.175889 35.706667 351.940705 
 127.176000 35.706667 351.860321 
 127.176111 35.706667 347.259873 
 127.176222 35.706667 337.672528 
 127.176444 35.706667 332.242099 
 127.176667 35.706667 329.744223 
 127.176778 35.706667 329.222750 
 127.176889 35.706667 325.379370 
 127.177000 35.706667 319.572537 
 127.175889 35.706778 353.177474 
 127.176000 35.706778 352.855723 
 127.176111 35.706778 348.623874 
 127.176222 35.706778 338.760923 
 127.176444 35.706778 332.801274 
 127.176667 35.706778 330.588741 
 127.176778 35.706778 328.407403 
 127.176889 35.706778 322.899194 
 127.177000 35.706778 318.002179 
 127.175889 35.706889 353.818339 
 127.176000 35.706889 353.386875 
 127.176111 35.706889 349.898878 
 127.176222 35.706889 341.059777 
 127.176444 35.706889 333.542645 
 127.176667 35.706889 331.330304 
 127.176778 35.706889 327.311830 
 127.176889 35.706889 320.789122 
 127.177000 35.706889 317.441728 
 127.176000 35.706889 353.386875 
 127.176111 35.706889 349.898878 
 127.176222 35.706889 341.059777 
 127.176333 35.706889 335.611560 
 127.176556 35.706889 332.533295 
 127.176778 35.706889 327.311830 
 127.176889 35.706889 320.789122 
 127.177000 35.706889 317.441728 
 127.177111 35.706889 318.983974 
 127.176000 35.707000 353.794785 
 127.176111 35.707000 351.489548 
 127.176222 35.707000 345.186747 
 127.176333 35.707000 338.966330 
 127.176556 35.707000 333.302887 
 127.176778 35.707000 327.596035 
 127.176889 35.707000 320.086744 
 127.177000 35.707000 318.153104 
 127.177111 35.707000 322.546207 
 127.176000 35.707111 354.400578 
 127.176111 35.707111 353.840546 
 127.176222 35.707111 350.632937 
 127.176333 35.707111 343.710829 
 127.176556 35.707111 334.169726 
 127.176778 35.707111 332.223556 
 127.176889 35.707111 322.168842 
 127.177000 35.707111 320.793437 
 127.177111 35.707111 328.678874 
 127.176000 35.707222 355.577578 
 127.176111 35.707222 356.656045 
 127.176222 35.707222 355.233440 
 127.176333 35.707222 348.154822 
 127.176556 35.707222 335.381325 
 127.176778 35.707222 342.281712 
 127.176889 35.707222 328.904469 
 127.177000 35.707222 326.431161 
 127.177111 35.707222 336.802225 
 127.176111 35.707222 356.656045 
 127.176222 35.707222 355.233440 
 127.176333 35.707222 348.154822 
 127.176444 35.707222 337.622289 
 127.176667 35.707222 341.074221 
 127.176889 35.707222 328.904469 
 127.177000 35.707222 326.431161 
 127.177111 35.707222 336.802225 
 127.177222 35.707222 348.189516 
 127.176111 35.707333 358.828196 
 127.176222 35.707333 357.885042 
 127.176333 35.707333 351.363121 
 127.176444 35.707333 339.473109 
 127.176667 35.707333 346.516315 
 127.176889 35.707333 340.658892 
 127.177000 35.707333 335.285874 
 127.177111 35.707333 344.480024 
 127.177222 35.707333 351.426026 
 127.176111 35.707444 359.979457 
 127.176222 35.707444 359.224066 
 127.176333 35.707444 353.851915 
 127.176444 35.707444 342.444037 
 127.176667 35.707444 352.266488 
 127.176889 35.707444 353.137510 
 127.177000 35.707444 344.916532 
 127.177111 35.707444 349.684767 
 127.177222 35.707444 352.993128 
 127.176111 35.707556 360.509125 
 127.176222 35.707556 360.092906 
 127.176333 35.707556 356.663127 
 127.176444 35.707556 347.980206 
 127.176667 35.707556 357.746308 
 127.176889 35.707556 361.228611 
 127.177000 35.707556 351.809098 
 127.177111 35.707556 352.348865 
 127.177222 35.707556 353.589222 
 127.176222 35.707556 360.092906 
 127.176333 35.707556 356.663127 
 127.176444 35.707556 347.980206 
 127.176556 35.707556 346.155045 
 127.176778 35.707556 365.962599 
 127.177000 35.707556 351.809098 
 127.177111 35.707556 352.348865 
 127.177222 35.707556 353.589222 
 127.177333 35.707556 353.783820 
 127.176222 35.707667 361.164283 
 127.176333 35.707667 360.854999 
 127.176444 35.707667 356.794211 
 127.176556 35.707667 354.259840 
 127.176778 35.707667 368.047496 
 127.177000 35.707667 354.908953 
 127.177111 35.707667 353.298840 
 127.177222 35.707667 353.476747 
 127.177333 35.707667 352.882497 
 127.176222 35.707778 363.139248 
 127.176333 35.707778 366.402817 
 127.176444 35.707778 366.015119 
 127.176556 35.707778 363.068674 
 127.176778 35.707778 368.573823 
 127.177000 35.707778 354.981988 
 127.177111 35.707778 353.053171 
 127.177222 35.707778 352.345837 
 127.177333 35.707778 350.236407 
 127.176222 35.707889 366.492126 
 127.176333 35.707889 371.323515 
 127.176444 35.707889 371.863254 
 127.176556 35.707889 369.319847 
 127.176778 35.707889 367.537401 
 127.177000 35.707889 353.211646 
 127.177111 35.707889 351.760488 
 127.177222 35.707889 349.753538 
 127.177333 35.707889 346.220743 
 127.176333 35.707889 371.323515 
 127.176444 35.707889 371.863254 
 127.176556 35.707889 369.319847 
 127.176667 35.707889 367.968261 
 127.176889 35.707889 360.784182 
 127.177111 35.707889 351.760488 
 127.177222 35.707889 349.753538 
 127.177333 35.707889 346.220743 
 127.177444 35.707889 341.906007 
 127.176333 35.708000 374.193246 
 127.176444 35.708000 374.342242 
 127.176556 35.708000 371.796567 
 127.176667 35.708000 367.640959 
 127.176889 35.708000 356.447665 
 127.177111 35.708000 349.879749 
 127.177222 35.708000 346.569312 
 127.177333 35.708000 343.204616 
 127.177444 35.708000 340.027876 
 127.176333 35.708111 375.407060 
 127.176444 35.708111 374.876119 
 127.176556 35.708111 371.140040 
 127.176667 35.708111 364.821138 
 127.176889 35.708111 352.948913 
 127.177111 35.708111 348.276753 
 127.177222 35.708111 344.339668 
 127.177333 35.708111 341.747374 
 127.177444 35.708111 339.187308 
 127.176333 35.708222 375.729046 
 127.176444 35.708222 374.204549 
 127.176556 35.708222 368.339126 
 127.176667 35.708222 361.475359 
 127.176889 35.708222 351.204280 
 127.177111 35.708222 347.265276 
 127.177222 35.708222 343.176909 
 127.177333 35.708222 341.042912 
 127.177444 35.708222 338.455633 
 127.176444 35.708222 374.204549 
 127.176556 35.708222 368.339126 
 127.176667 35.708222 361.475359 
 127.176778 35.708222 357.223405 
 127.177000 35.708222 348.965387 
 127.177222 35.708222 343.176909 
 127.177333 35.708222 341.042912 
 127.177444 35.708222 338.455633 
 127.177556 35.708222 335.049178 
 127.176444 35.708333 372.379460 
 127.176556 35.708333 364.694688 
 127.176667 35.708333 359.325712 
 127.176778 35.708333 356.269991 
 127.177000 35.708333 348.718040 
 127.177222 35.708333 342.453536 
 127.177333 35.708333 340.485751 
 127.177444 35.708333 337.200022 
 127.177556 35.708333 331.429784 
 127.176444 35.708444 369.359427 
 127.176556 35.708444 361.587535 
 127.176667 35.708444 358.313729 
 127.176778 35.708444 356.453352 
 127.177000 35.708444 348.791580 
 127.177222 35.708444 341.538289 
 127.177333 35.708444 339.626676 
 127.177444 35.708444 334.517463 
 127.177556 35.708444 325.244777 
 127.176556 35.708444 361.587535 
 127.176667 35.708444 358.313729 
 127.176778 35.708444 356.453352 
 127.176889 35.708444 351.869904 
 127.177111 35.708444 345.399683 
 127.177333 35.708444 339.626676 
 127.177444 35.708444 334.517463 
 127.177556 35.708444 325.244777 
 127.177667 35.708444 312.978624 
 127.176556 35.708556 359.598110 
 127.176667 35.708556 357.933576 
 127.176778 35.708556 357.039086 
 127.176889 35.708556 353.762727 
 127.177111 35.708556 343.686419 
 127.177333 35.708556 338.190589 
 127.177444 35.708556 329.643115 
 127.177556 35.708556 318.259537 
 127.177667 35.708556 310.321100 
 127.176556 35.708667 358.562584 
 127.176667 35.708667 357.894188 
 127.176778 35.708667 357.741195 
 127.176889 35.708667 356.025317 
 127.177111 35.708667 342.147438 
 127.177333 35.708667 336.913480 
 127.177444 35.708667 324.995476 
 127.177556 35.708667 314.604782 
 127.177667 35.708667 310.111549 
 127.176556 35.708778 358.135514 
 127.176667 35.708778 358.086088 
 127.176778 35.708778 358.398364 
 127.176889 35.708778 357.684672 
 127.177111 35.708778 341.623325 
 127.177333 35.708778 336.658414 
 127.177444 35.708778 324.750898 
 127.177556 35.708778 315.486271 
 127.177667 35.708778 311.759793 
 127.176667 35.708778 358.086088 
 127.176778 35.708778 358.398364 
 127.176889 35.708778 357.684672 
 127.177000 35.708778 351.927164 
 127.177222 35.708778 338.767394 
 127.177444 35.708778 324.750898 
 127.177556 35.708778 315.486271 
 127.177667 35.708778 311.759793 
 127.177778 35.708778 310.410502 
 127.176667 35.708889 358.440143 
 127.176778 35.708889 358.864992 
 127.176889 35.708889 358.495717 
 127.177000 35.708889 353.482361 
 127.177222 35.708889 338.826165 
 127.177444 35.708889 328.005189 
 127.177556 35.708889 319.527221 
 127.177667 35.708889 315.120139 
 127.177778 35.708889 312.999847 
 127.176667 35.709000 358.820434 
 127.176778 35.709000 359.108981 
 127.176889 35.709000 358.790173 
 127.177000 35.709000 354.903955 
 127.177222 35.709000 339.319094 
 127.177444 35.709000 332.078440 
 127.177556 35.709000 325.204816 
 127.177667 35.709000 320.025624 
 127.177778 35.709000 315.954567 
 127.176667 35.709111 359.086234 
 127.176778 35.709111 359.185145 
 127.176889 35.709111 358.809923 
 127.177000 35.709111 356.079559 
 127.177222 35.709111 340.614840 
 127.177444 35.709111 335.464038 
 127.177556 35.709111 330.794387 
 127.177667 35.709111 325.242225 
 127.177778 35.709111 317.692044 
 127.176778 35.709111 359.185145 
 127.176889 35.709111 358.809923 
 127.177000 35.709111 356.079559 
 127.177111 35.709111 347.252387 
 127.177333 35.709111 338.506422 
 127.177556 35.709111 330.794387 
 127.177667 35.709111 325.242225 
 127.177778 35.709111 317.692044 
 127.177889 35.709111 312.972897 
 127.176778 35.709222 359.141794 
 127.176889 35.709222 358.635728 
 127.177000 35.709222 356.844363 
 127.177111 35.709222 351.373561 
 127.177333 35.709222 339.437901 
 127.177556 35.709222 334.857847 
 127.177667 35.709222 328.858072 
 127.177778 35.709222 317.889490 
 127.177889 35.709222 312.890546 
 127.176778 35.709333 358.986505 
 127.176889 35.709333 358.310059 
 127.177000 35.709333 357.156760 
 127.177111 35.709333 354.536640 
 127.177333 35.709333 340.582462 
 127.177556 35.709333 337.012320 
 127.177667 35.709333 330.258539 
 127.177778 35.709333 317.719748 
 127.177889 35.709333 313.014439 
 127.176778 35.709444 358.711267 
 127.176889 35.709444 357.920867 
 127.177000 35.709444 357.158744 
 127.177111 35.709444 355.965174 
 127.177333 35.709444 342.334727 
 127.177556 35.709444 337.710483 
 127.177667 35.709444 330.531095 
 127.177778 35.709444 318.234947 
 127.177889 35.709444 313.599448 
 127.176889 35.709444 357.920867 
 127.177000 35.709444 357.158744 
 127.177111 35.709444 355.965174 
 127.177222 35.709444 351.547996 
 127.177444 35.709444 339.704136 
 127.177667 35.709444 330.531095 
 127.177778 35.709444 318.234947 
 127.177889 35.709444 313.599448 
 127.178000 35.709444 313.881145 
 127.176889 35.709556 357.559414 
 127.177000 35.709556 356.971489 
 127.177111 35.709556 356.167620 
 127.177222 35.709556 353.490146 
 127.177444 35.709556 340.823196 
 127.177667 35.709556 330.963244 
 127.177778 35.709556 320.074458 
 127.177889 35.709556 315.033893 
 127.178000 35.709556 316.115680 
 127.176889 35.709667 357.241827 
 127.177000 35.709667 356.602299 
 127.177111 35.709667 355.711159 
 127.177222 35.709667 353.795809 
 127.177444 35.709667 342.914901 
 127.177667 35.709667 331.951979 
 127.177778 35.709667 323.355678 
 127.177889 35.709667 317.725667 
 127.178000 35.709667 319.114204 
 127.176889 35.709778 356.902951 
 127.177000 35.709778 356.034445 
 127.177111 35.709778 355.036964 
 127.177222 35.709778 353.510718 
 127.177444 35.709778 345.208781 
 127.177667 35.709778 333.041263 
 127.177778 35.709778 327.200159 
 127.177889 35.709778 321.388983 
 127.178000 35.709778 321.707534 
 127.177000 35.709778 356.034445 
 127.177111 35.709778 355.036964 
 127.177222 35.709778 353.510718 
 127.177333 35.709778 349.841892 
 127.177556 35.709778 337.666784 
 127.177778 35.709778 327.200159 
 127.177889 35.709778 321.388983 
 127.178000 35.709778 321.707534 
 127.178111 35.709778 322.987833 
 127.177000 35.709889 355.366951 
 127.177111 35.709889 354.457487 
 127.177222 35.709889 353.149390 
 127.177333 35.709889 350.406569 
 127.177556 35.709889 338.190985 
 127.177778 35.709889 330.209166 
 127.177889 35.709889 324.694207 
 127.178000 35.709889 323.309311 
 127.178111 35.709889 323.466105 
 127.177000 35.710000 354.768098 
 127.177111 35.710000 354.000884 
 127.177222 35.710000 352.679990 
 127.177333 35.710000 350.464413 
 127.177556 35.710000 338.609232 
 127.177778 35.710000 331.908895 
 127.177889 35.710000 326.961967 
 127.178000 35.710000 324.400485 
 127.178111 35.710000 323.920987 
 127.177000 35.710111 354.289648 
 127.177111 35.710111 353.413317 
 127.177222 35.710111 351.753577 
 127.177333 35.710111 350.081199 
 127.177556 35.710111 338.425436 
 127.177778 35.710111 332.688746 
 127.177889 35.710111 328.780782 
 127.178000 35.710111 325.672044 
 127.178111 35.710111 324.682795 
 127.177111 35.710111 353.413317 
 127.177222 35.710111 351.753577 
 127.177333 35.710111 350.081199 
 127.177444 35.710111 347.367909 
 127.177667 35.710111 333.973876 
 127.177889 35.710111 328.780782 
 127.178000 35.710111 325.672044 
 127.178111 35.710111 324.682795 
 127.178222 35.710111 325.241737 
 127.177111 35.710222 352.215327 
 127.177222 35.710222 350.111128 
 127.177333 35.710222 348.910993 
 127.177444 35.710222 345.949973 
 127.177667 35.710222 332.846440 
 127.177889 35.710222 330.724278 
 127.178000 35.710222 327.580117 
 127.178111 35.710222 326.039821 
 127.178222 35.710222 326.716796 
 127.177111 35.710333 350.294726 
 127.177222 35.710333 348.344294 
 127.177333 35.710333 346.619995 
 127.177444 35.710333 341.313244 
 127.177667 35.710333 329.650172 
 127.177889 35.710333 332.561887 
 127.178000 35.710333 329.995488 
 127.178111 35.710333 327.930323 
 127.178222 35.710333 328.104578 
 127.177111 35.710444 348.544556 
 127.177222 35.710444 346.972437 
 127.177333 35.710444 343.415494 
 127.177444 35.710444 333.945473 
 127.177667 35.710444 324.673231 
 127.177889 35.710444 333.738824 
 127.178000 35.710444 332.115452 
 127.178111 35.710444 329.621228 
 127.178222 35.710444 328.857170 
 127.177222 35.710444 346.972437 
 127.177333 35.710444 343.415494 
 127.177444 35.710444 333.945473 
 127.177556 35.710444 324.425979 
 127.177778 35.710444 331.372088 
 127.178000 35.710444 332.115452 
 127.178111 35.710444 329.621228 
 127.178222 35.710444 328.857170 
 127.178333 35.710444 328.690380 
 127.177222 35.710556 345.512070 
 127.177333 35.710556 339.509625 
 127.177444 35.710556 328.846629 
 127.177556 35.710556 320.654235 
 127.177778 35.710556 329.502908 
 127.178000 35.710556 333.325985 
 127.178111 35.710556 330.462363 
 127.178222 35.710556 328.971160 
 127.178333 35.710556 328.201663 
 127.177222 35.710667 343.127340 
 127.177333 35.710667 335.356412 
 127.177444 35.710667 326.782909 
 127.177556 35.710667 319.492419 
 127.177778 35.710667 327.224250 
 127.178000 35.710667 333.590718 
 127.178111 35.710667 330.441805 
 127.178222 35.710667 328.547569 
 127.178333 35.710667 327.039527 
 127.177222 35.710778 339.244906 
 127.177333 35.710778 332.017967 
 127.177444 35.710778 326.027160 
 127.177556 35.710778 319.186162 
 127.177778 35.710778 324.788434 
 127.178000 35.710778 332.846060 
 127.178111 35.710778 329.612129 
 127.178222 35.710778 327.406494 
 127.178333 35.710778 324.639579 
 127.177333 35.710778 332.017967 
 127.177444 35.710778 326.027160 
 127.177556 35.710778 319.186162 
 127.177667 35.710778 316.957091 
 127.177889 35.710778 332.794049 
 127.178111 35.710778 329.612129 
 127.178222 35.710778 327.406494 
 127.178333 35.710778 324.639579 
 127.178444 35.710778 318.517119 
 127.177333 35.710889 330.110437 
 127.177444 35.710889 325.691994 
 127.177556 35.710889 319.126565 
 127.177667 35.710889 316.546310 
 127.177889 35.710889 330.378419 
 127.178111 35.710889 327.517576 
 127.178222 35.710889 324.957459 
 127.178333 35.710889 320.199378 
 127.178444 35.710889 311.626785 
 127.177333 35.711000 329.257831 
 127.177444 35.711000 325.469621 
 127.177556 35.711000 319.329607 
 127.177667 35.711000 317.120552 
 127.177889 35.711000 325.472420 
 127.178111 35.711000 323.170094 
 127.178222 35.711000 320.300959 
 127.178333 35.711000 313.414561 
 127.178444 35.711000 304.463077 
 127.177444 35.711111 325.315536 
 127.177556 35.711111 320.233318 
 127.177667 35.711111 319.292009 
 127.177778 35.711111 320.834480 
 127.178000 35.711111 316.540828 
 127.178222 35.711111 313.324763 
 127.178333 35.711111 305.820971 
 127.178444 35.711111 299.155873 
 127.178556 35.711111 295.712849 
 127.177444 35.711222 325.416265 
 127.177556 35.711222 322.468076 
 127.177667 35.711222 322.935185 
 127.177778 35.711222 322.034626 
 127.178000 35.711222 311.653977 
 127.178222 35.711222 306.173805 
 127.178333 35.711222 299.944093 
 127.178444 35.711222 296.216301 
 127.178556 35.711222 294.873620 
 127.177444 35.711333 326.200437 
 127.177556 35.711333 325.636633 
 127.177667 35.711333 326.254443 
 127.177778 35.711333 323.302569 
 127.178000 35.711333 309.905334 
 127.178222 35.711333 301.400376 
 127.178333 35.711333 296.638624 
 127.178444 35.711333 294.901647 
 127.178556 35.711333 294.690168 
 127.177556 35.711333 325.636633 
 127.177667 35.711333 326.254443 
 127.177778 35.711333 323.302569 
 127.177889 35.711333 314.101067 
 127.178111 35.711333 307.730443 
 127.178333 35.711333 296.638624 
 127.178444 35.711333 294.901647 
 127.178556 35.711333 294.690168 
 127.178667 35.711333 295.379023 
 127.177556 35.711444 328.076434 
 127.177667 35.711444 328.070229 
 127.177778 35.711444 324.057575 
 127.177889 35.711444 314.058433 
 127.178111 35.711444 306.804235 
 127.178333 35.711444 295.162943 
 127.178444 35.711444 294.427375 
 127.178556 35.711444 294.802474 
 127.178667 35.711444 295.640601 
 127.177556 35.711556 329.254013 
 127.177667 35.711556 328.776118 
 127.177778 35.711556 324.366688 
 127.177889 35.711556 314.394680 
 127.178111 35.711556 306.937731 
 127.178333 35.711556 294.596685 
 127.178444 35.711556 294.311723 
 127.178556 35.711556 294.997108 
 127.178667 35.711556 295.804392 
 127.177556 35.711667 329.666594 
 127.177667 35.711667 328.902981 
 127.177778 35.711667 324.279376 
 127.177889 35.711667 314.935578 
 127.178111 35.711667 307.785411 
 127.178333 35.711667 294.386350 
 127.178444 35.711667 294.277414 
 127.178556 35.711667 295.111039 
 127.178667 35.711667 295.808724 
 127.177667 35.711667 328.902981 
 127.177778 35.711667 324.279376 
 127.177889 35.711667 314.935578 
 127.178000 35.711667 310.752871 
 127.178222 35.711667 298.922628 
 127.178444 35.711667 294.277414 
 127.178556 35.711667 295.111039 
 127.178667 35.711667 295.808724 
 127.178778 35.711667 295.870664 
 127.177667 35.711778 328.618004 
 127.177778 35.711778 323.675556 
 127.177889 35.711778 315.666498 
 127.178000 35.711778 312.234144 
 127.178222 35.711778 299.837868 
 127.178444 35.711778 294.077549 
 127.178556 35.711778 294.981784 
 127.178667 35.711778 295.573656 
 127.178778 35.711778 295.270294 
 127.177667 35.711889 327.765190 
 127.177778 35.711889 322.404267 
 127.177889 35.711889 316.464965 
 127.178000 35.711889 314.089853 
 127.178222 35.711889 301.181852 
 127.178444 35.711889 293.398310 
 127.178556 35.711889 294.421015 
 127.178667 35.711889 294.947900 
 127.178778 35.711889 293.945264 
 127.177667 35.712000 326.004874 
 127.177778 35.712000 320.691975 
 127.177889 35.712000 317.052013 
 127.178000 35.712000 315.506491 
 127.178222 35.712000 301.733528 
 127.178444 35.712000 291.967895 
 127.178556 35.712000 293.239526 
 127.178667 35.712000 293.676992 
 127.178778 35.712000 291.295567 
 127.177778 35.712000 320.691975 
 127.177889 35.712000 317.052013 
 127.178000 35.712000 315.506491 
 127.178111 35.712000 312.732417 
 127.178333 35.712000 292.189148 
 127.178556 35.712000 293.239526 
 127.178667 35.712000 293.676992 
 127.178778 35.712000 291.295567 
 127.178889 35.712000 281.736813 
 127.177778 35.712111 319.190136 
 127.177889 35.712111 317.249385 
 127.178000 35.712111 315.846908 
 127.178111 35.712111 311.929728 
 127.178333 35.712111 289.697171 
 127.178556 35.712111 291.382893 
 127.178667 35.712111 291.467967 
 127.178778 35.712111 286.716992 
 127.178889 35.712111 273.550558 
 127.177778 35.712222 318.248032 
 127.177889 35.712222 317.028789 
 127.178000 35.712222 314.903596 
 127.178111 35.712222 308.452695 
 127.178333 35.712222 286.916506 
 127.178556 35.712222 289.165623 
 127.178667 35.712222 288.330528 
 127.178778 35.712222 280.534230 
 127.178889 35.712222 266.512973 
 127.177778 35.712333 317.665463 
 127.177889 35.712333 316.294468 
 127.178000 35.712333 312.391002 
 127.178111 35.712333 302.339540 
 127.178333 35.712333 284.523439 
 127.178556 35.712333 287.146210 
 127.178667 35.712333 284.865242 
 127.178778 35.712333 274.394453 
 127.178889 35.712333 262.019243 
 127.177889 35.712333 316.294468 
 127.178000 35.712333 312.391002 
 127.178111 35.712333 302.339540 
 127.178222 35.712333 288.579805 
 127.178444 35.712333 286.283457 
 127.178667 35.712333 284.865242 
 127.178778 35.712333 274.394453 
 127.178889 35.712333 262.019243 
 127.179000 35.712333 257.093222 
 127.177889 35.712444 314.738425 
 127.178000 35.712444 307.822461 
 127.178111 35.712444 294.602197 
 127.178222 35.712444 283.427377 
 127.178444 35.712444 285.187912 
 127.178667 35.712444 281.892524 
 127.178778 35.712444 269.823709 
 127.178889 35.712444 259.634447 
 127.179000 35.712444 256.477762 
 127.177889 35.712556 311.800696 
 127.178000 35.712556 301.038055 
 127.178111 35.712556 287.131291 
 127.178222 35.712556 279.735740 
 127.178444 35.712556 284.291297 
 127.178667 35.712556 279.656595 
 127.178778 35.712556 266.902446 
 127.178889 35.712556 258.414287 
 127.179000 35.712556 256.166224 
 127.177889 35.712667 306.873254 
 127.178000 35.712667 293.064377 
 127.178111 35.712667 281.473135 
 127.178222 35.712667 277.325322 
 127.178444 35.712667 283.214651 
 127.178667 35.712667 277.815020 
 127.178778 35.712667 264.955139 
 127.178889 35.712667 257.700841 
 127.179000 35.712667 255.948807 
 127.178000 35.712667 293.064377 
 127.178111 35.712667 281.473135 
 127.178222 35.712667 277.325322 
 127.178333 35.712667 279.380091 
 127.178556 35.712667 283.644415 
 127.178778 35.712667 264.955139 
 127.178889 35.712667 257.700841 
 127.179000 35.712667 255.948807 
 127.179111 35.712667 255.566759 
 127.178000 35.712778 285.813772 
 127.178111 35.712778 277.866358 
 127.178222 35.712778 275.693419 
 127.178333 35.712778 277.554854 
 127.178556 35.712778 282.128976 
 127.178778 35.712778 263.285843 
 127.178889 35.712778 257.116558 
 127.179000 35.712778 255.705257 
 127.179111 35.712778 255.356815 
 127.178000 35.712889 280.533242 
 127.178111 35.712889 275.706669 
 127.178222 35.712889 274.276696 
 127.178333 35.712889 274.914106 
 127.178556 35.712889 279.157564 
 127.178778 35.712889 261.402109 
 127.178889 35.712889 256.445905 
 127.179000 35.712889 255.353622 
 127.179111 35.712889 255.033945 
 127.178111 35.712889 275.706669 
 127.178222 35.712889 274.276696 
 127.178333 35.712889 274.914106 
 127.178444 35.712889 277.852471 
 127.178667 35.712889 272.715664 
 127.178889 35.712889 256.445905 
 127.179000 35.712889 255.353622 
 127.179111 35.712889 255.033945 
 127.179222 35.712889 254.669106 
 127.178111 35.713000 274.266694 
 127.178222 35.713000 272.472025 
 127.178333 35.713000 270.811421 
 127.178444 35.713000 271.882966 
 127.178667 35.713000 268.304080 
 127.178889 35.713000 255.626065 
 127.179000 35.713000 254.877909 
 127.179111 35.713000 254.650291 
 127.179222 35.713000 254.430526 
 127.178111 35.713111 272.865482 
 127.178222 35.713111 269.603885 
 127.178333 35.713111 265.230333 
 127.178444 35.713111 264.440565 
 127.178667 35.713111 263.078529 
 127.178889 35.713111 254.779679 
 127.179000 35.713111 254.373737 
 127.179111 35.713111 254.327475 
 127.179222 35.713111 254.300816 
 127.178111 35.713222 270.825948 
 127.178222 35.713222 265.330861 
 127.178333 35.713222 259.580823 
 127.178444 35.713222 258.195573 
 127.178667 35.713222 258.531014 
 127.178889 35.713222 254.113031 
 127.179000 35.713222 253.984622 
 127.179111 35.713222 254.134414 
 127.179222 35.713222 254.244934 
 127.178222 35.713222 265.330861 
 127.178333 35.713222 259.580823 
 127.178444 35.713222 258.195573 
 127.178556 35.713222 259.832494 
 127.178778 35.713222 255.246123 
 127.179000 35.713222 253.984622 
 127.179111 35.713222 254.134414 
 127.179222 35.713222 254.244934 
 127.179333 35.713222 254.282985 
 127.178222 35.713333 260.354088 
 127.178333 35.713333 255.447680 
 127.178444 35.713333 254.431384 
 127.178556 35.713333 255.490783 
 127.178778 35.713333 254.186009 
 127.179000 35.713333 253.756032 
 127.179111 35.713333 254.045651 
 127.179222 35.713333 254.226461 
 127.179333 35.713333 254.293559 
 127.178222 35.713444 256.179354 
 127.178333 35.713444 253.114367 
 127.178444 35.713444 252.586651 
 127.178556 35.713444 253.259881 
 127.178778 35.713444 253.602580 
 127.179000 35.713444 253.641626 
 127.179111 35.713444 254.011593 
 127.179222 35.713444 254.226039 
 127.179333 35.713444 254.327141 
 127.178222 35.713556 253.547677 
 127.178333 35.713556 251.979528 
 127.178444 35.713556 251.766241 
 127.178556 35.713556 252.240008 
 127.178778 35.713556 253.256348 
 127.179000 35.713556 253.572635 
 127.179111 35.713556 253.993744 
 127.179222 35.713556 254.236516 
 127.179333 35.713556 254.404288 
 127.178333 35.713556 251.979528 
 127.178444 35.713556 251.766241 
 127.178556 35.713556 252.240008 
 127.178667 35.713556 253.009095 
 127.178889 35.713556 253.328567 
 127.179111 35.713556 253.993744 
 127.179222 35.713556 254.236516 
 127.179333 35.713556 254.404288 
 127.179444 35.713556 254.816409 
 127.178333 35.713667 251.472789 
 127.178444 35.713667 251.430978 
 127.178556 35.713667 251.816277 
 127.178667 35.713667 252.516163 
 127.178889 35.713667 253.174852 
 127.179111 35.713667 253.958591 
 127.179222 35.713667 254.255839 
 127.179333 35.713667 254.560530 
 127.179444 35.713667 255.280019 
 127.178333 35.713778 251.265478 
 127.178444 35.713778 251.329731 
 127.178556 35.713778 251.673468 
 127.178667 35.713778 252.186315 
 127.178889 35.713778 252.909726 
 127.179111 35.713778 253.851502 
 127.179222 35.713778 254.274959 
 127.179333 35.713778 254.825685 
 127.179444 35.713778 255.831877 
 127.178333 35.713889 251.206553 
 127.178444 35.713889 251.356432 
 127.178556 35.713889 251.651193 
 127.178667 35.713889 251.950907 
 127.178889 35.713889 252.458407 
 127.179111 35.713889 253.562780 
 127.179222 35.713889 254.246410 
 127.179333 35.713889 255.152440 
 127.179444 35.713889 256.276981 
 127.178444 35.713889 251.356432 
 127.178556 35.713889 251.651193 
 127.178667 35.713889 251.950907 
 127.178778 35.713889 252.234092 
 127.179000 35.713889 252.818534 
 127.179222 35.713889 254.246410 
 127.179333 35.713889 255.152440 
 127.179444 35.713889 256.276981 
 127.179556 35.713889 256.905615 
 127.178444 35.714000 251.449449 
 127.178556 35.714000 251.662311 
 127.178667 35.714000 251.792175 
 127.178778 35.714000 251.867437 
 127.179000 35.714000 252.124276 
 127.179222 35.714000 254.039071 
 127.179333 35.714000 255.344082 
 127.179444 35.714000 256.480081 
 127.179556 35.714000 256.979957 
 127.178444 35.714111 251.550141 
 127.178556 35.714111 251.669770 
 127.178667 35.714111 251.686093 
 127.178778 35.714111 251.584518 
 127.179000 35.714111 251.452555 
 127.179222 35.714111 253.522881 
 127.179333 35.714111 255.182643 
 127.179444 35.714111 256.424101 
 127.179556 35.714111 256.943459 
 127.178556 35.714111 251.669770 
 127.178667 35.714111 251.686093 
 127.178778 35.714111 251.584518 
 127.178889 35.714111 251.397387 
 127.179111 35.714111 252.173172 
 127.179333 35.714111 255.182643 
 127.179444 35.714111 256.424101 
 127.179556 35.714111 256.943459 
 127.179667 35.714111 257.069650 
 127.178556 35.714222 251.666071 
 127.178667 35.714222 251.606351 
 127.178778 35.714222 251.379026 
 127.178889 35.714222 251.079752 
 127.179111 35.714222 251.545034 
 127.179333 35.714222 254.644981 
 127.179444 35.714222 256.121481 
 127.179556 35.714222 256.786964 
 127.179667 35.714222 256.861121 
 127.178556 35.714333 251.652060 
 127.178667 35.714333 251.532126 
 127.178778 35.714333 251.219555 
 127.178889 35.714333 250.897763 
 127.179111 35.714333 251.216141 
 127.179333 35.714333 253.888482 
 127.179444 35.714333 255.563844 
 127.179556 35.714333 256.435806 
 127.179667 35.714333 256.313797 
 127.178556 35.714445 251.627798 
 127.178667 35.714445 251.449960 
 127.178778 35.714445 251.083117 
 127.178889 35.714445 250.786481 
 127.179111 35.714445 251.070736 
 127.179333 35.714445 253.109131 
 127.179444 35.714445 254.744405 
 127.179556 35.714445 255.735475 
 127.179667 35.714445 255.249432 
 127.178667 35.714445 251.449960 
 127.178778 35.714445 251.083117 
 127.178889 35.714445 250.786481 
 127.179000 35.714445 250.744253 
 127.179222 35.714445 251.846115 
 127.179444 35.714445 254.744405 
 127.179556 35.714445 255.735475 
 127.179667 35.714445 255.249432 
 127.179778 35.714445 253.837719 
 127.178667 35.714556 251.351239 
 127.178778 35.714556 250.955558 
 127.178889 35.714556 250.695462 
 127.179000 35.714556 250.668422 
 127.179222 35.714556 251.587760 
 127.179444 35.714556 253.710647 
 127.179556 35.714556 254.528543 
 127.179667 35.714556 253.915810 
 127.179778 35.714556 253.156073 
 127.178667 35.714667 251.229499 
 127.178778 35.714667 250.821761 
 127.178889 35.714667 250.581679 
 127.179000 35.714667 250.551092 
 127.179222 35.714667 251.407565 
 127.179444 35.714667 252.587881 
 127.179556 35.714667 252.931425 
 127.179667 35.714667 252.805951 
 127.179778 35.714667 252.802876 
 127.178667 35.714778 251.078734 
 127.178778 35.714778 250.659663 
 127.178889 35.714778 250.410038 
 127.179000 35.714778 250.360465 
 127.179222 35.714778 251.249977 
 127.179444 35.714778 251.547864 
 127.179556 35.714778 251.443239 
 127.179667 35.714778 252.009969 
 127.179778 35.714778 252.548848 
 127.178778 35.714778 250.659663 
 127.178889 35.714778 250.410038 
 127.179000 35.714778 250.360465 
 127.179111 35.714778 250.708608 
 127.179333 35.714778 251.505836 
 127.179556 35.714778 251.443239 
 127.179667 35.714778 252.009969 
 127.179778 35.714778 252.548848 
 127.179889 35.714778 252.563655 
 127.178778 35.714889 250.447317 
 127.178889 35.714889 250.182513 
 127.179000 35.714889 250.123637 
 127.179111 35.714889 250.467666 
 127.179333 35.714889 251.141672 
 127.179556 35.714889 250.406649 
 127.179667 35.714889 251.349141 
 127.179778 35.714889 252.249150 
 127.179889 35.714889 252.255055 
 127.178778 35.715000 250.198563 
 127.178889 35.715000 249.958510 
 127.179000 35.715000 249.913409 
 127.179111 35.715000 250.208910 
 127.179333 35.715000 250.755688 
 127.179556 35.715000 249.795945 
 127.179667 35.715000 250.723262 
 127.179778 35.715000 251.825183 
 127.179889 35.715000 251.825391 
 127.178889 35.715000 249.958510 
 127.179000 35.715000 249.913409 
 127.179111 35.715000 250.208910 
 127.179222 35.715000 250.812320 
 127.179444 35.715000 250.099697 
 127.179667 35.715000 250.723262 
 127.179778 35.715000 251.825183 
 127.179889 35.715000 251.825391 
 127.180000 35.715000 251.333009 
 127.178889 35.715111 249.793894 
 127.179000 35.715111 249.772707 
 127.179111 35.715111 250.000300 
 127.179222 35.715111 250.486014 
 127.179444 35.715111 249.703377 
 127.179667 35.715111 250.174283 
 127.179778 35.715111 251.310128 
 127.179889 35.715111 251.415568 
 127.180000 35.715111 251.175239 
 127.178889 35.715222 249.697532 
 127.179000 35.715222 249.705214 
 127.179111 35.715222 249.901089 
 127.179222 35.715222 250.186560 
 127.179444 35.715222 249.484286 
 127.179667 35.715222 249.816015 
 127.179778 35.715222 250.904375 
 127.179889 35.715222 251.182278 
 127.180000 35.715222 251.124718 
 127.178889 35.715333 249.655918 
 127.179000 35.715333 249.721271 
 127.179111 35.715333 249.990205 
 127.179222 35.715333 250.097146 
 127.179444 35.715333 249.416815 
 127.179667 35.715333 249.716455 
 127.179778 35.715333 250.774128 
 127.179889 35.715333 251.122173 
 127.180000 35.715333 251.139089 
 127.179000 35.715333 249.721271 
 127.179111 35.715333 249.990205 
 127.179222 35.715333 250.097146 
 127.179333 35.715333 249.769361 
 127.179556 35.715333 249.276151 
 127.179778 35.715333 250.774128 
 127.179889 35.715333 251.122173 
 127.180000 35.715333 251.139089 
 127.180111 35.715333 251.243799 
 127.179000 35.715445 249.890959 
 127.179111 35.715445 250.362179 
 127.179222 35.715445 250.266688 
 127.179333 35.715445 249.810523 
 127.179556 35.715445 249.383206 
 127.179778 35.715445 250.882688 
 127.179889 35.715445 251.167143 
 127.180000 35.715445 251.206649 
 127.180111 35.715445 251.440097 
 127.179000 35.715556 250.354134 
 127.179111 35.715556 250.953036 
 127.179222 35.715556 250.594591 
 127.179333 35.715556 250.004405 
 127.179556 35.715556 249.746338 
 127.179778 35.715556 251.120528 
 127.179889 35.715556 251.276902 
 127.180000 35.715556 251.335011 
 127.180111 35.715556 251.701521 
 127.179000 35.715667 251.114214 
 127.179111 35.715667 251.518058 
 127.179222 35.715667 250.987293 
 127.179333 35.715667 250.329966 
 127.179556 35.715667 250.632154 
 127.179778 35.715667 251.398841 
 127.179889 35.715667 251.427658 
 127.180000 35.715667 251.522362 
 127.180111 35.715667 251.947839 
 127.179111 35.715667 251.518058 
 127.179222 35.715667 250.987293 
 127.179333 35.715667 250.329966 
 127.179444 35.715667 250.209309 
 127.179667 35.715667 251.106536 
 127.179889 35.715667 251.427658 
 127.180000 35.715667 251.522362 
 127.180111 35.715667 251.947839 
 127.180222 35.715667 252.211851 
 127.179111 35.715778 251.919288 
 127.179222 35.715778 251.391901 
 127.179333 35.715778 250.820942 
 127.179444 35.715778 251.162996 
 127.179667 35.715778 251.983263 
 127.179889 35.715778 251.588520 
 127.180000 35.715778 251.740228 
 127.180111 35.715778 252.156602 
 127.180222 35.715778 252.330464 
 127.179111 35.715889 252.180974 
 127.179222 35.715889 251.791116 
 127.179333 35.715889 251.559096 
 127.179444 35.715889 252.751737 
 127.179667 35.715889 252.857612 
 127.179889 35.715889 251.744819 
 127.180000 35.715889 251.977878 
 127.180111 35.715889 252.393132 
 127.180222 35.715889 252.531063 
 127.179222 35.715889 251.791116 
 127.179333 35.715889 251.559096 
 127.179444 35.715889 252.751737 
 127.179556 35.715889 254.111324 
 127.179778 35.715889 251.907403 
 127.180000 35.715889 251.977878 
 127.180111 35.715889 252.393132 
 127.180222 35.715889 252.531063 
 127.180333 35.715889 252.783909 
 127.179222 35.716000 252.202540 
 127.179333 35.716000 252.636573 
 127.179444 35.716000 254.634062 
 127.179556 35.716000 255.550443 
 127.179778 35.716000 252.212377 
 127.180000 35.716000 252.282491 
 127.180111 35.716000 252.767556 
 127.180222 35.716000 252.926057 
 127.180333 35.716000 253.397245 
 127.179222 35.716111 252.698887 
 127.179333 35.716111 254.033205 
 127.179444 35.716111 256.080474 
 127.179556 35.716111 256.424124 
 127.179778 35.716111 252.717090 
 127.180000 35.716111 252.745120 
 127.180111 35.716111 253.386067 
 127.180222 35.716111 253.639529 
 127.180333 35.716111 254.399819 
 127.179222 35.716222 253.405885 
 127.179333 35.716222 255.434135 
 127.179444 35.716222 256.860325 
 127.179556 35.716222 256.974811 
 127.179778 35.716222 253.684161 
 127.180000 35.716222 253.441581 
 127.180111 35.716222 254.198962 
 127.180222 35.716222 254.585467 
 127.180333 35.716222 255.492743 
 127.179333 35.716222 255.434135 
 127.179444 35.716222 256.860325 
 127.179556 35.716222 256.974811 
 127.179667 35.716222 255.758688 
 127.179889 35.716222 252.898218 
 127.180111 35.716222 254.198962 
 127.180222 35.716222 254.585467 
 127.180333 35.716222 255.492743 
 127.180444 35.716222 256.898757 
 127.179333 35.716333 256.448918 
 127.179444 35.716333 257.240796 
 127.179556 35.716333 257.442867 
 127.179667 35.716333 257.110327 
 127.179889 35.716333 254.254648 
 127.180111 35.716333 254.947586 
 127.180222 35.716333 255.384288 
 127.180333 35.716333 256.257228 
 127.180444 35.716333 257.301006 
 127.179333 35.716444 257.020281 
 127.179444 35.716444 257.498524 
 127.179556 35.716444 258.026925 
 127.179667 35.716444 258.898756 
 127.179889 35.716444 256.742935 
 127.180111 35.716444 255.475844 
 127.180222 35.716444 255.859624 
 127.180333 35.716444 256.692224 
 127.180444 35.716444 257.529925 
 127.179333 35.716556 257.334911 
 127.179444 35.716556 257.815881 
 127.179556 35.716556 258.929302 
 127.179667 35.716556 261.204257 
 127.179889 35.716556 260.242059 
 127.180111 35.716556 255.858577 
 127.180222 35.716556 256.138896 
 127.180333 35.716556 256.967346 
 127.180444 35.716556 257.685459 
 127.179444 35.716556 257.815881 
 127.179556 35.716556 258.929302 
 127.179667 35.716556 261.204257 
 127.179778 35.716556 262.525895 
 127.180000 35.716556 256.856540 
 127.180222 35.716556 256.138896 
 127.180333 35.716556 256.967346 
 127.180444 35.716556 257.685459 
 127.180556 35.716556 258.025599 
 127.179444 35.716667 258.359389 
 127.179556 35.716667 260.360403 
 127.179667 35.716667 263.800677 
 127.179778 35.716667 265.836180 
 127.180000 35.716667 258.499279 
 127.180222 35.716667 256.366031 
 127.180333 35.716667 257.185229 
 127.180444 35.716667 257.816541 
 127.180556 35.716667 258.140907 
 127.179444 35.716778 259.328595 
 127.179556 35.716778 262.381036 
 127.179667 35.716778 266.141652 
 127.179778 35.716778 267.886790 
 127.180000 35.716778 260.538193 
 127.180222 35.716778 256.630879 
 127.180333 35.716778 257.395173 
 127.180444 35.716778 257.967504 
 127.180556 35.716778 258.334666 
 127.179556 35.716778 262.381036 
 127.179667 35.716778 266.141652 
 127.179778 35.716778 267.886790 
 127.179889 35.716778 266.365085 
 127.180111 35.716778 256.842308 
 127.180333 35.716778 257.395173 
 127.180444 35.716778 257.967504 
 127.180556 35.716778 258.334666 
 127.180667 35.716778 258.686802 
 127.179556 35.716889 264.706643 
 127.179667 35.716889 267.827133 
 127.179778 35.716889 268.943504 
 127.179889 35.716889 267.984302 
 127.180111 35.716889 257.944704 
 127.180333 35.716889 257.662679 
 127.180444 35.716889 258.221002 
 127.180556 35.716889 258.648304 
 127.180667 35.716889 258.902562 
 127.179556 35.717000 266.774714 
 127.179667 35.717000 268.837647 
 127.179778 35.717000 269.452057 
 127.179889 35.717000 268.931538 
 127.180111 35.717000 260.098962 
 127.180333 35.717000 258.137854 
 127.180444 35.717000 258.729305 
 127.180556 35.717000 259.093310 
 127.180667 35.717000 259.090888 
 127.179556 35.717111 268.215874 
 127.179667 35.717111 269.377370 
 127.179778 35.717111 269.706017 
 127.179889 35.717111 269.507722 
 127.180111 35.717111 263.594303 
 127.180333 35.717111 259.099964 
 127.180444 35.717111 259.653199 
 127.180556 35.717111 259.675470 
 127.180667 35.717111 259.305149 
 127.179667 35.717111 269.377370 
 127.179778 35.717111 269.706017 
 127.179889 35.717111 269.507722 
 127.180000 35.717111 267.794635 
 127.180222 35.717111 259.784588 
 127.180444 35.717111 259.653199 
 127.180556 35.717111 259.675470 
 127.180667 35.717111 259.305149 
 127.180778 35.717111 259.160992 
 127.179667 35.717222 269.654098 
 127.179778 35.717222 269.859906 
 127.179889 35.717222 269.905307 
 127.180000 35.717222 269.379628 
 127.180222 35.717222 262.937356 
 127.180444 35.717222 260.896201 
 127.180556 35.717222 260.415376 
 127.180667 35.717222 259.626269 
 127.180778 35.717222 259.369429 
 127.179667 35.717333 269.804596 
 127.179778 35.717333 269.993509 
 127.179889 35.717333 270.219313 
 127.180000 35.717333 270.252528 
 127.180222 35.717333 266.144834 
 127.180444 35.717333 262.013947 
 127.180556 35.717333 261.271556 
 127.180667 35.717333 260.142338 
 127.180778 35.717333 259.708970 
 127.179667 35.717444 269.911541 
 127.179778 35.717444 270.149849 
 127.179889 35.717444 270.477484 
 127.180000 35.717444 270.656088 
 127.180222 35.717444 268.084713 
 127.180444 35.717444 262.736090 
 127.180556 35.717444 262.093876 
 127.180667 35.717444 260.879138 
 127.180778 35.717444 260.072279 
 127.179778 35.717444 270.149849 
 127.179889 35.717444 270.477484 
 127.180000 35.717444 270.656088 
 127.180111 35.717444 270.401115 
 127.180333 35.717444 263.686965 
 127.180556 35.717444 262.093876 
 127.180667 35.717444 260.879138 
 127.180778 35.717444 260.072279 
 127.180889 35.717444 259.997160 
 127.179778 35.717555 270.337901 
 127.179889 35.717555 270.671426 
 127.180000 35.717555 270.825900 
 127.180111 35.717555 270.707290 
 127.180333 35.717555 264.454953 
 127.180556 35.717555 262.740908 
 127.180667 35.717555 261.710444 
 127.180778 35.717555 260.356477 
 127.180889 35.717555 260.083398 
 127.179778 35.717667 270.533239 
 127.179889 35.717667 270.799378 
 127.180000 35.717667 270.895721 
 127.180111 35.717667 270.787498 
 127.180333 35.717667 265.126151 
 127.180556 35.717667 263.270380 
 127.180667 35.717667 262.567521 
 127.180778 35.717667 260.722004 
 127.180889 35.717667 260.263224 
 127.179889 35.717667 270.799378 
 127.180000 35.717667 270.895721 
 127.180111 35.717667 270.787498 
 127.180222 35.717667 269.276502 
 127.180444 35.717667 263.536433 
 127.180667 35.717667 262.567521 
 127.180778 35.717667 260.722004 
 127.180889 35.717667 260.263224 
 127.181000 35.717667 260.436357 
 127.179889 35.717778 270.874594 
 127.180000 35.717778 270.924049 
 127.180111 35.717778 270.772221 
 127.180222 35.717778 269.304661 
 127.180444 35.717778 264.114757 
 127.180667 35.717778 263.549286 
 127.180778 35.717778 261.482366 
 127.180889 35.717778 260.754644 
 127.181000 35.717778 261.145906 
 127.179889 35.717889 270.916783 
 127.180000 35.717889 270.939940 
 127.180111 35.717889 270.716361 
 127.180222 35.717889 269.192926 
 127.180444 35.717889 265.006272 
 127.180667 35.717889 264.494663 
 127.180778 35.717889 262.768114 
 127.180889 35.717889 261.810400 
 127.181000 35.717889 262.016283 
 127.179889 35.718000 270.944034 
 127.180000 35.718000 270.978832 
 127.180111 35.718000 270.736991 
 127.180222 35.718000 269.241679 
 127.180444 35.718000 265.960362 
 127.180667 35.718000 265.082813 
 127.180778 35.718000 263.981646 
 127.180889 35.718000 263.057638 
 127.181000 35.718000 262.537835 
 127.180000 35.718000 270.978832 
 127.180111 35.718000 270.736991 
 127.180222 35.718000 269.241679 
 127.180333 35.718000 267.471703 
 127.180556 35.718000 265.252576 
 127.180778 35.718000 263.981646 
 127.180889 35.718000 263.057638 
 127.181000 35.718000 262.537835 
 127.181111 35.718000 262.350315 
 127.180000 35.718111 271.130385 
 127.180111 35.718111 271.107419 
 127.180222 35.718111 269.751556 
 127.180333 35.718111 268.153240 
 127.180556 35.718111 265.682459 
 127.180778 35.718111 264.579641 
 127.180889 35.718111 263.788028 
 127.181000 35.718111 262.781032 
 127.181111 35.718111 262.475693 
 127.180000 35.718222 271.591184 
 127.180111 35.718222 272.059372 
 127.180222 35.718222 270.773011 
 127.180333 35.718222 269.004536 
 127.180556 35.718222 266.045317 
 127.180778 35.718222 264.772359 
 127.180889 35.718222 264.099504 
 127.181000 35.718222 262.992563 
 127.181111 35.718222 262.733486 
 127.180111 35.718222 272.059372 
 127.180222 35.718222 270.773011 
 127.180333 35.718222 269.004536 
 127.180444 35.718222 267.421077 
 127.180667 35.718222 265.473804 
 127.180889 35.718222 264.099504 
 127.181000 35.718222 262.992563 
 127.181111 35.718222 262.733486 
 127.181222 35.718222 263.361448 
 127.180111 35.718333 273.337975 
 127.180222 35.718333 272.084362 
 127.180333 35.718333 270.138035 
 127.180444 35.718333 268.344753 
 127.180667 35.718333 265.696398 
 127.180889 35.718333 264.321637 
 127.181000 35.718333 263.355020 
 127.181111 35.718333 263.231698 
 127.181222 35.718333 263.908152 
 127.180111 35.718444 274.452830 
 127.180222 35.718444 273.369168 
 127.180333 35.718444 271.504185 
 127.180444 35.718444 269.772819 
 127.180667 35.718444 266.378459 
 127.180889 35.718444 264.687122 
 127.181000 35.718444 264.033022 
 127.181111 35.718444 263.911473 
 127.181222 35.718444 264.291967 
 127.180111 35.718555 275.202308 
 127.180222 35.718555 274.392506 
 127.180333 35.718555 272.872539 
 127.180444 35.718555 271.616471 
 127.180667 35.718555 268.125983 
 127.180889 35.718555 265.379388 
 127.181000 35.718555 264.968108 
 127.181111 35.718555 264.492596 
 127.181222 35.718555 264.514660 
 127.180222 35.718555 274.392506 
 127.180333 35.718555 272.872539 
 127.180444 35.718555 271.616471 
 127.180556 35.718555 270.583288 
 127.180778 35.718555 265.777353 
 127.181000 35.718555 264.968108 
 127.181111 35.718555 264.492596 
 127.181222 35.718555 264.514660 
 127.181333 35.718555 264.830050 
 127.180222 35.718667 275.089761 
 127.180333 35.718667 273.962037 
 127.180444 35.718667 273.186496 
 127.180556 35.718667 272.801468 
 127.180778 35.718667 267.040031 
 127.181000 35.718667 265.782876 
 127.181111 35.718667 264.901307 
 127.181222 35.718667 264.696825 
 127.181333 35.718667 265.081631 
 127.180222 35.718778 275.493684 
 127.180333 35.718778 274.588292 
 127.180444 35.718778 273.985600 
 127.180556 35.718778 273.825372 
 127.180778 35.718778 268.264128 
 127.181000 35.718778 266.318146 
 127.181111 35.718778 265.280019 
 127.181222 35.718778 264.942164 
 127.181333 35.718778 265.361891 
 127.180333 35.718778 274.588292 
 127.180444 35.718778 273.985600 
 127.180556 35.718778 273.825372 
 127.180667 35.718778 272.509887 
 127.180889 35.718778 266.849060 
 127.181111 35.718778 265.280019 
 127.181222 35.718778 264.942164 
 127.181333 35.718778 265.361891 
 127.181444 35.718778 265.710100 
 127.180333 35.718889 274.764453 
 127.180444 35.718889 274.247282 
 127.180556 35.718889 274.176253 
 127.180667 35.718889 273.307562 
 127.180889 35.718889 267.158479 
 127.181111 35.718889 265.738808 
 127.181222 35.718889 265.317452 
 127.181333 35.718889 265.629115 
 127.181444 35.718889 265.815964 
 127.180333 35.719000 274.672783 
 127.180444 35.719000 274.323190 
 127.180556 35.719000 274.373048 
 127.180667 35.719000 273.869558 
 127.180889 35.719000 267.437029 
 127.181111 35.719000 266.308889 
 127.181222 35.719000 265.859875 
 127.181333 35.719000 265.899808 
 127.181444 35.719000 265.970786 
 127.180333 35.719111 274.524822 
 127.180444 35.719111 274.394943 
 127.180556 35.719111 274.662208 
 127.180667 35.719111 274.637383 
 127.180889 35.719111 267.940591 
 127.181111 35.719111 267.019732 
 127.181222 35.719111 266.624773 
 127.181333 35.719111 266.277095 
 127.181444 35.719111 266.268728 
 127.180444 35.719111 274.394943 
 127.180556 35.719111 274.662208 
 127.180667 35.719111 274.637383 
 127.180778 35.719111 271.313491 
 127.181000 35.719111 267.208480 
 127.181222 35.719111 266.624773 
 127.181333 35.719111 266.277095 
 127.181444 35.719111 266.268728 
 127.181556 35.719111 266.878454 
 127.180444 35.719222 274.559810 
 127.180556 35.719222 275.173066 
 127.180667 35.719222 275.604716 
 127.180778 35.719222 273.180968 
 127.181000 35.719222 267.716110 
 127.181222 35.719222 267.717911 
 127.181333 35.719222 266.938630 
 127.181444 35.719222 266.854930 
 127.181556 35.719222 267.745040 
 127.180444 35.719333 274.901715 
 127.180556 35.719333 275.878017 
 127.180667 35.719333 276.459895 
 127.180778 35.719333 274.983845 
 127.181000 35.719333 268.844581 
 127.181222 35.719333 269.056146 
 127.181333 35.719333 268.010550 
 127.181444 35.719333 267.815307 
 127.181556 35.719333 268.690854 
 127.180556 35.719444 276.563625 
 127.180667 35.719444 277.012973 
 127.180778 35.719444 276.256704 
 127.180889 35.719444 273.428106 
 127.181111 35.719444 270.582502 
 127.181333 35.719444 269.281862 
 127.181444 35.719444 268.917396 
 127.181556 35.719444 269.379789 
 127.181667 35.719444 269.797909 
 127.180556 35.719556 277.042954 
 127.180667 35.719556 277.308336 
 127.180778 35.719556 276.980990 
 127.180889 35.719556 275.592189 
 127.181111 35.719556 271.545010 
 127.181333 35.719556 270.257521 
 127.181444 35.719556 269.720663 
 127.181556 35.719556 269.740533 
 127.181667 35.719556 269.980801 
 127.180556 35.719667 277.311583 
 127.180667 35.719667 277.456640 
 127.180778 35.719667 277.350818 
 127.180889 35.719667 276.782972 
 127.181111 35.719667 272.225553 
 127.181333 35.719667 270.769203 
 127.181444 35.719667 270.117191 
 127.181556 35.719667 269.910417 
 127.181667 35.719667 270.207830 
 127.180667 35.719667 277.456640 
 127.180778 35.719667 277.350818 
 127.180889 35.719667 276.782972 
 127.181000 35.719667 274.896824 
 127.181222 35.719667 271.330237 
 127.181444 35.719667 270.117191 
 127.181556 35.719667 269.910417 
 127.181667 35.719667 270.207830 
 127.181778 35.719667 271.399922 
 127.180667 35.719778 277.536851 
 127.180778 35.719778 277.535694 
 127.180889 35.719778 277.294688 
 127.181000 35.719778 275.866928 
 127.181222 35.719778 271.600306 
 127.181444 35.719778 270.277256 
 127.181556 35.719778 270.022649 
 127.181667 35.719778 270.564353 
 127.181778 35.719778 272.231470 
 127.180667 35.719889 277.590668 
 127.180778 35.719889 277.634613 
 127.180889 35.719889 277.530978 
 127.181000 35.719889 276.548868 
 127.181222 35.719889 272.010278 
 127.181444 35.719889 270.362978 
 127.181556 35.719889 270.164928 
 127.181667 35.719889 271.103812 
 127.181778 35.719889 273.036822 
 127.180778 35.720000 277.704402 
 127.180889 35.720000 277.712171 
 127.181000 35.720000 277.220478 
 127.181111 35.720000 275.084758 
 127.181333 35.720000 271.535549 
 127.181556 35.720000 270.421386 
 127.181667 35.720000 271.821778 
 127.181778 35.720000 273.675172 
 127.181889 35.720000 274.483014 
 127.180778 35.720111 277.785842 
 127.180889 35.720111 277.956529 
 127.181000 35.720111 278.022364 
 127.181111 35.720111 276.860027 
 127.181333 35.720111 272.436422 
 127.181556 35.720111 270.923789 
 127.181667 35.720111 272.629987 
 127.181778 35.720111 274.111063 
 127.181889 35.720111 274.630605 
 127.180778 35.720222 277.927404 
 127.180889 35.720222 278.357174 
 127.181000 35.720222 278.928159 
 127.181111 35.720222 278.589846 
 127.181333 35.720222 274.475113 
 127.181556 35.720222 271.897654 
 127.181667 35.720222 273.404831 
 127.181778 35.720222 274.386042 
 127.181889 35.720222 274.744987 
 127.180889 35.720222 278.357174 
 127.181000 35.720222 278.928159 
 127.181111 35.720222 278.589846 
 127.181222 35.720222 276.892911 
 127.181444 35.720222 272.217379 
 127.181667 35.720222 273.404831 
 127.181778 35.720222 274.386042 
 127.181889 35.720222 274.744987 
 127.182000 35.720222 275.277695 
 127.180889 35.720333 278.948664 
 127.181000 35.720333 279.733690 
 127.181111 35.720333 279.789595 
 127.181222 35.720333 279.063609 
 127.181444 35.720333 275.199555 
 127.181667 35.720333 274.045248 
 127.181778 35.720333 274.555577 
 127.181889 35.720333 274.880127 
 127.182000 35.720333 275.828390 
 127.180889 35.720444 279.621034 
 127.181000 35.720444 280.285994 
 127.181111 35.720444 280.473485 
 127.181222 35.720444 280.549751 
 127.181444 35.720444 279.042981 
 127.181667 35.720444 274.521810 
 127.181778 35.720444 274.671147 
 127.181889 35.720444 275.092068 
 127.182000 35.720444 276.669431 
 127.180889 35.720556 280.173168 
 127.181000 35.720556 280.611686 
 127.181111 35.720556 280.888860 
 127.181222 35.720556 281.528526 
 127.181444 35.720556 281.550980 
 127.181667 35.720556 274.876665 
 127.181778 35.720556 274.778376 
 127.181889 35.720556 275.415738 
 127.182000 35.720556 277.629761 
 127.181000 35.720556 280.611686 
 127.181111 35.720556 280.888860 
 127.181222 35.720556 281.528526 
 127.181333 35.720556 282.575353 
 127.181556 35.720556 276.943871 
 127.181778 35.720556 274.778376 
 127.181889 35.720556 275.415738 
 127.182000 35.720556 277.629761 
 127.182111 35.720556 280.137316 
 127.181000 35.720667 280.824993 
 127.181111 35.720667 281.252163 
 127.181222 35.720667 282.303664 
 127.181333 35.720667 283.478120 
 127.181556 35.720667 278.092213 
 127.181778 35.720667 274.922001 
 127.181889 35.720667 275.836577 
 127.182000 35.720667 278.458088 
 127.182111 35.720667 280.459676 
 127.181000 35.720778 281.037306 
 127.181111 35.720778 281.705588 
 127.181222 35.720778 282.997556 
 127.181333 35.720778 283.935241 
 127.181556 35.720778 279.109539 
 127.181778 35.720778 275.158555 
 127.181889 35.720778 276.326202 
 127.182000 35.720778 279.079536 
 127.182111 35.720778 280.654362 
 127.181111 35.720778 281.705588 
 127.181222 35.720778 282.997556 
 127.181333 35.720778 283.935241 
 127.181444 35.720778 283.279487 
 127.181667 35.720778 275.652352 
 127.181889 35.720778 276.326202 
 127.182000 35.720778 279.079536 
 127.182111 35.720778 280.654362 
 127.182222 35.720778 281.068567 
 127.181111 35.720889 282.306919 
 127.181222 35.720889 283.575378 
 127.181333 35.720889 284.189323 
 127.181444 35.720889 283.681069 
 127.181667 35.720889 276.395243 
 127.181889 35.720889 276.893569 
 127.182000 35.720889 279.552409 
 127.182111 35.720889 280.808573 
 127.182222 35.720889 281.238386 
 127.181111 35.721000 282.996073 
 127.181222 35.721000 283.989049 
 127.181333 35.721000 284.352533 
 127.181444 35.721000 284.047454 
 127.181667 35.721000 277.727186 
 127.181889 35.721000 277.604581 
 127.182000 35.721000 279.956388 
 127.182111 35.721000 280.983099 
 127.182222 35.721000 281.546686 
 127.181222 35.721000 283.989049 
 127.181333 35.721000 284.352533 
 127.181444 35.721000 284.047454 
 127.181556 35.721000 281.512889 
 127.181778 35.721000 276.427184 
 127.182000 35.721000 279.956388 
 127.182111 35.721000 280.983099 
 127.182222 35.721000 281.546686 
 127.182333 35.721000 282.574950 
 127.181222 35.721111 284.248719 
 127.181333 35.721111 284.488373 
 127.181444 35.721111 284.450585 
 127.181556 35.721111 283.039031 
 127.181778 35.721111 278.008042 
 127.182000 35.721111 280.359520 
 127.182111 35.721111 281.240426 
 127.182222 35.721111 282.082923 
 127.182333 35.721111 283.583638 
 127.181222 35.721222 284.412225 
 127.181333 35.721222 284.649453 
 127.181444 35.721222 284.947902 
 127.181556 35.721222 284.633288 
 127.181778 35.721222 280.570049 
 127.182000 35.721222 280.855853 
 127.182111 35.721222 281.669738 
 127.182222 35.721222 282.919180 
 127.182333 35.721222 284.724112 
 127.181222 35.721333 284.544181 
 127.181333 35.721333 284.889899 
 127.181444 35.721333 285.561935 
 127.181556 35.721333 285.996272 
 127.181778 35.721333 283.610885 
 127.182000 35.721333 281.614014 
 127.182111 35.721333 282.382989 
 127.182222 35.721333 284.006989 
 127.182333 35.721333 285.736612 
 127.181333 35.721333 284.889899 
 127.181444 35.721333 285.561935 
 127.181556 35.721333 285.996272 
 127.181667 35.721333 285.239087 
 127.181889 35.721333 281.987118 
 127.182111 35.721333 282.382989 
 127.182222 35.721333 284.006989 
 127.182333 35.721333 285.736612 
 127.182444 35.721333 286.814939 
 127.181333 35.721444 285.262775 
 127.181444 35.721444 286.239082 
 127.181556 35.721444 286.930491 
 127.181667 35.721444 286.813684 
 127.181889 35.721444 284.476809 
 127.182111 35.721444 283.457640 
 127.182222 35.721444 285.133676 
 127.182333 35.721444 286.470458 
 127.182444 35.721444 287.213396 
 127.181333 35.721556 285.789826 
 127.181444 35.721556 286.861506 
 127.181556 35.721556 287.475781 
 127.181667 35.721556 287.618813 
 127.181889 35.721556 286.932990 
 127.182111 35.721556 284.839582 
 127.182222 35.721556 286.073313 
 127.182333 35.721556 286.950401 
 127.182444 35.721556 287.551522 
 127.181444 35.721556 286.861506 
 127.181556 35.721556 287.475781 
 127.181667 35.721556 287.618813 
 127.181778 35.721556 287.580546 
 127.182000 35.721556 285.003108 
 127.182222 35.721556 286.073313 
 127.182333 35.721556 286.950401 
 127.182444 35.721556 287.551522 
 127.182556 35.721556 288.432665 
 127.181444 35.721667 287.330723 
 127.181556 35.721667 287.779509 
 127.181667 35.721667 288.050765 
 127.181778 35.721667 288.493865 
 127.182000 35.721667 287.543594 
 127.182222 35.721667 286.751440 
 127.182333 35.721667 287.279690 
 127.182444 35.721667 287.935331 
 127.182556 35.721667 289.107201 
 127.181444 35.721778 287.639569 
 127.181556 35.721778 287.977345 
 127.181667 35.721778 288.384947 
 127.181778 35.721778 289.200102 
 127.182000 35.721778 289.691432 
 127.182222 35.721778 287.262402 
 127.182333 35.721778 287.573308 
 127.182444 35.721778 288.439759 
 127.182556 35.721778 289.838773 
 127.181444 35.721889 287.837712 
 127.181556 35.721889 288.159663 
 127.181667 35.721889 288.762568 
 127.181778 35.721889 289.871055 
 127.182000 35.721889 291.086508 
 127.182222 35.721889 287.797141 
 127.182333 35.721889 287.940387 
 127.182444 35.721889 289.085696 
 127.182556 35.721889 290.530105 
 127.181556 35.721889 288.159663 
 127.181667 35.721889 288.762568 
 127.181778 35.721889 289.871055 
 127.181889 35.721889 290.980983 
 127.182111 35.721889 289.224109 
 127.182333 35.721889 287.940387 
 127.182444 35.721889 289.085696 
 127.182556 35.721889 290.530105 
 127.182667 35.721889 291.428355 
 127.181556 35.722000 288.390052 
 127.181667 35.722000 289.245511 
 127.181778 35.722000 290.523553 
 127.181889 35.722000 291.576027 
 127.182111 35.722000 290.845410 
 127.182333 35.722000 288.512822 
 127.182444 35.722000 289.850560 
 127.182556 35.722000 291.163230 
 127.182667 35.722000 291.908120 
 127.181556 35.722111 288.714641 
 127.181667 35.722111 289.827415 
 127.181778 35.722111 291.112695 
 127.181889 35.722111 292.054328 
 127.182111 35.722111 292.763067 
 127.182333 35.722111 289.480575 
 127.182444 35.722111 290.712935 
 127.182556 35.722111 291.814090 
 127.182667 35.722111 292.535956 
 127.181667 35.722111 289.827415 
 127.181778 35.722111 291.112695 
 127.181889 35.722111 292.054328 
 127.182000 35.722111 292.801105 
 127.182222 35.722111 290.407660 
 127.182444 35.722111 290.712935 
 127.182556 35.722111 291.814090 
 127.182667 35.722111 292.535956 
 127.182778 35.722111 293.611828 
 127.181667 35.722222 290.451793 
 127.181778 35.722222 291.621994 
 127.181889 35.722222 292.542379 
 127.182000 35.722222 293.739175 
 127.182222 35.722222 293.420940 
 127.182444 35.722222 291.732053 
 127.182556 35.722222 292.631271 
 127.182667 35.722222 293.473402 
 127.182778 35.722222 295.163208 
 127.181667 35.722333 291.044703 
 127.181778 35.722333 292.085888 
 127.181889 35.722333 293.165103 
 127.182000 35.722333 294.975298 
 127.182222 35.722333 297.094871 
 127.182444 35.722333 293.039965 
 127.182556 35.722333 293.766657 
 127.182667 35.722333 294.827266 
 127.182778 35.722333 297.308379 
 127.181667 35.722444 291.569373 
 127.181778 35.722444 292.584135 
 127.181889 35.722444 294.043676 
 127.182000 35.722444 296.524863 
 127.182222 35.722444 300.020658 
 127.182444 35.722444 294.717459 
 127.182556 35.722444 295.250084 
 127.182667 35.722444 296.509634 
 127.182778 35.722444 299.753261 
 127.181778 35.722444 292.584135 
 127.181889 35.722444 294.043676 
 127.182000 35.722444 296.524863 
 127.182111 35.722444 299.244083 
 127.182333 35.722444 296.639304 
 127.182556 35.722444 295.250084 
 127.182667 35.722444 296.509634 
 127.182778 35.722444 299.753261 
 127.182889 35.722444 307.276706 
 127.181778 35.722556 293.225886 
 127.181889 35.722556 295.262766 
 127.182000 35.722556 298.233837 
 127.182111 35.722556 300.798717 
 127.182333 35.722556 299.320011 
 127.182556 35.722556 296.869180 
 127.182667 35.722556 298.215610 
 127.182778 35.722556 302.086899 
 127.182889 35.722556 309.619627 
 127.181778 35.722667 294.119718 
 127.181889 35.722667 296.788221 
 127.182000 35.722667 299.831891 
 127.182111 35.722667 301.870502 
 127.182333 35.722667 301.155396 
 127.182556 35.722667 298.270777 
 127.182667 35.722667 299.655452 
 127.182778 35.722667 304.106299 
 127.182889 35.722667 311.328052 
 127.181889 35.722667 296.788221 
 127.182000 35.722667 299.831891 
 127.182111 35.722667 301.870502 
 127.182222 35.722667 302.632793 
 127.182444 35.722667 298.341986 
 127.182667 35.722667 299.655452 
 127.182778 35.722667 304.106299 
 127.182889 35.722667 311.328052 
 127.183000 35.722667 315.244685 
 127.181889 35.722778 298.444692 
 127.182000 35.722778 301.119100 
 127.182111 35.722778 302.569599 
 127.182222 35.722778 303.144907 
 127.182444 35.722778 299.735520 
 127.182667 35.722778 300.814806 
 127.182778 35.722778 305.891929 
 127.182889 35.722778 312.645474 
 127.183000 35.722778 315.725917 
 127.181889 35.722889 299.972624 
 127.182000 35.722889 302.039008 
 127.182111 35.722889 303.031751 
 127.182222 35.722889 303.531456 
 127.182444 35.722889 300.931387 
 127.182667 35.722889 301.896409 
 127.182778 35.722889 307.629690 
 127.182889 35.722889 313.774439 
 127.183000 35.722889 316.217992 
 127.181889 35.723000 301.195724 
 127.182000 35.723000 302.659250 
 127.182111 35.723000 303.381865 
 127.182222 35.723000 303.925721 
 127.182444 35.723000 302.163934 
 127.182667 35.723000 303.244127 
 127.182778 35.723000 309.565547 
 127.182889 35.723000 314.915976 
 127.183000 35.723000 316.888128 
 127.182000 35.723000 302.659250 
 127.182111 35.723000 303.381865 
 127.182222 35.723000 303.925721 
 127.182333 35.723000 303.969436 
 127.182556 35.723000 300.964252 
 127.182778 35.723000 309.565547 
 127.182889 35.723000 314.915976 
 127.183000 35.723000 316.888128 
 127.183111 35.723000 318.698580 
 127.182000 35.723111 303.083351 
 127.182111 35.723111 303.713580 
 127.182222 35.723111 304.354207 
 127.182333 35.723111 304.602602 
 127.182556 35.723111 302.279275 
 127.182778 35.723111 311.966332 
 127.182889 35.723111 316.282025 
 127.183000 35.723111 317.972869 
 127.183111 35.723111 321.145869 
 127.182000 35.723222 303.411365 
 127.182111 35.723222 304.078051 
 127.182222 35.723222 304.760719 
 127.182333 35.723222 305.063594 
 127.182556 35.723222 304.397008 
 127.182778 35.723222 314.961652 
 127.182889 35.723222 318.036133 
 127.183000 35.723222 319.712619 
 127.183111 35.723222 324.839378 
 127.182111 35.723222 304.078051 
 127.182222 35.723222 304.760719 
 127.182333 35.723222 305.063594 
 127.182444 35.723222 304.621425 
 127.182667 35.723222 308.677334 
 127.182889 35.723222 318.036133 
 127.183000 35.723222 319.712619 
 127.183111 35.723222 324.839378 
 127.183222 35.723222 333.950326 
 127.182111 35.723333 304.467245 
 127.182222 35.723333 305.085125 
 127.182333 35.723333 305.396281 
 127.182444 35.723333 305.652862 
 127.182667 35.723333 313.074534 
 127.182889 35.723333 320.089810 
 127.183000 35.723333 322.069531 
 127.183111 35.723333 328.890526 
 127.183222 35.723333 336.669236 
 127.182111 35.723444 304.825014 
 127.182222 35.723444 305.322110 
 127.182333 35.723444 305.705767 
 127.182444 35.723444 306.733598 
 127.182667 35.723444 316.955452 
 127.182889 35.723444 321.980049 
 127.183000 35.723444 324.460981 
 127.183111 35.723444 332.022150 
 127.183222 35.723444 338.039612 
 127.182222 35.723444 305.322110 
 127.182333 35.723444 305.705767 
 127.182444 35.723444 306.733598 
 127.182556 35.723444 310.422198 
 127.182778 35.723444 320.762704 
 127.183000 35.723444 324.460981 
 127.183111 35.723444 332.022150 
 127.183222 35.723444 338.039612 
 127.183333 35.723444 339.764037 
 127.182222 35.723556 305.519883 
 127.182333 35.723556 306.136186 
 127.182444 35.723556 308.128772 
 127.182556 35.723556 312.905033 
 127.182778 35.723556 322.211873 
 127.183000 35.723556 326.236192 
 127.183111 35.723556 333.853835 
 127.183222 35.723556 338.648233 
 127.183333 35.723556 339.924896 
 127.182222 35.723667 305.755134 
 127.182333 35.723667 306.865659 
 127.182444 35.723667 309.905068 
 127.182556 35.723667 314.441363 
 127.182778 35.723667 322.710616 
 127.183000 35.723667 327.228227 
 127.183111 35.723667 334.701940 
 127.183222 35.723667 338.851267 
 127.183333 35.723667 340.036710 
 127.182222 35.723778 306.138738 
 127.182333 35.723778 308.070644 
 127.182444 35.723778 311.771885 
 127.182556 35.723778 315.216477 
 127.182778 35.723778 322.669659 
 127.183000 35.723778 327.649945 
 127.183111 35.723778 334.939537 
 127.183222 35.723778 338.765342 
 127.183333 35.723778 340.145806 
 127.182333 35.723778 308.070644 
 127.182444 35.723778 311.771885 
 127.182556 35.723778 315.216477 
 127.182667 35.723778 319.003645 
 127.182889 35.723778 324.272141 
 127.183111 35.723778 334.939537 
 127.183222 35.723778 338.765342 
 127.183333 35.723778 340.145806 
 127.183444 35.723778 342.824779 
 127.182333 35.723889 309.750569 
 127.182444 35.723889 313.286280 
 127.182556 35.723889 315.556114 
 127.182667 35.723889 318.511006 
 127.182889 35.723889 324.402609 
 127.183111 35.723889 334.754173 
 127.183222 35.723889 338.315583 
 127.183333 35.723889 340.219600 
 127.183444 35.723889 344.345114 
 127.182333 35.724000 311.572531 
 127.182444 35.724000 314.271907 
 127.182556 35.724000 315.725109 
 127.182667 35.724000 318.249623 
 127.182889 35.724000 324.613202 
 127.183111 35.724000 334.216566 
 127.183222 35.724000 337.359285 
 127.183333 35.724000 340.117880 
 127.183444 35.724000 345.439211 
 127.182444 35.724000 314.271907 
 127.182556 35.724000 315.725109 
 127.182667 35.724000 318.249623 
 127.182778 35.724000 322.391675 
 127.183000 35.724000 327.802951 
 127.183222 35.724000 337.359285 
 127.183333 35.724000 340.117880 
 127.183444 35.724000 345.439211 
 127.183556 35.724000 348.674882 
 127.182444 35.724111 314.844072 
 127.182556 35.724111 315.914036 
 127.182667 35.724111 318.519596 
 127.182778 35.724111 322.945393 
 127.183000 35.724111 328.008690 
 127.183222 35.724111 336.042479 
 127.183333 35.724111 339.727873 
 127.183444 35.724111 345.875454 
 127.183556 35.724111 348.861174 
 127.182444 35.724222 315.195810 
 127.182556 35.724222 316.307086 
 127.182667 35.724222 319.628876 
 127.182778 35.724222 324.294080 
 127.183000 35.724222 328.495532 
 127.183222 35.724222 334.892599 
 127.183333 35.724222 339.139874 
 127.183444 35.724222 345.846188 
 127.183556 35.724222 348.919034 
 127.182556 35.724333 317.156722 
 127.182667 35.724333 321.658238 
 127.182778 35.724333 325.917863 
 127.182889 35.724333 327.276684 
 127.183111 35.724333 332.464752 
 127.183333 35.724333 338.507004 
 127.183444 35.724333 345.588033 
 127.183556 35.724333 348.962722 
 127.183667 35.724333 349.967205 
 127.182556 35.724444 318.752589 
 127.182667 35.724444 324.058746 
 127.182778 35.724444 327.133693 
 127.182889 35.724444 328.031725 
 127.183111 35.724444 332.386814 
 127.183333 35.724444 337.923468 
 127.183444 35.724444 345.260384 
 127.183556 35.724444 349.079944 
 127.183667 35.724444 350.313357 
 127.182556 35.724556 321.150373 
 127.182667 35.724556 326.018658 
 127.182778 35.724556 327.846120 
 127.182889 35.724556 328.617632 
 127.183111 35.724556 332.633551 
 127.183333 35.724556 337.471792 
 127.183444 35.724556 344.984574 
 127.183556 35.724556 349.345283 
 127.183667 35.724556 350.712108 
 127.182667 35.724556 326.018658 
 127.182778 35.724556 327.846120 
 127.182889 35.724556 328.617632 
 127.183000 35.724556 330.461340 
 127.183222 35.724556 333.679215 
 127.183444 35.724556 344.984574 
 127.183556 35.724556 349.345283 
 127.183667 35.724556 350.712108 
 127.183778 35.724556 351.267500 
 127.182667 35.724667 327.225768 
 127.182778 35.724667 328.286781 
 127.182889 35.724667 329.358292 
 127.183000 35.724667 331.839619 
 127.183222 35.724667 333.983107 
 127.183444 35.724667 344.885602 
 127.183556 35.724667 349.776385 
 127.183667 35.724667 351.103202 
 127.183778 35.724667 351.570750 
 127.182667 35.724778 327.876403 
 127.182778 35.724778 328.707028 
 127.182889 35.724778 330.542167 
 127.183000 35.724778 333.734976 
 127.183222 35.724778 335.205029 
 127.183444 35.724778 345.030969 
 127.183556 35.724778 350.330343 
 127.183667 35.724778 351.587982 
 127.183778 35.724778 352.156236 
 127.182778 35.724778 328.707028 
 127.182889 35.724778 330.542167 
 127.183000 35.724778 333.734976 
 127.183111 35.724778 335.026000 
 127.183333 35.724778 338.188192 
 127.183556 35.724778 350.330343 
 127.183667 35.724778 351.587982 
 127.183778 35.724778 352.156236 
 127.183889 35.724778 355.500098 
 127.182778 35.724889 329.317216 
 127.182889 35.724889 332.216732 
 127.183000 35.724889 335.530925 
 127.183111 35.724889 336.737619 
 127.183333 35.724889 340.154715 
 127.183556 35.724889 351.091328 
 127.183667 35.724889 352.576835 
 127.183778 35.724889 353.578991 
 127.183889 35.724889 360.364194 
 127.182778 35.725000 330.277513 
 127.182889 35.725000 334.047641 
 127.183000 35.725000 336.789626 
 127.183111 35.725000 338.022107 
 127.183333 35.725000 342.007640 
 127.183556 35.725000 352.505057 
 127.183667 35.725000 354.848422 
 127.183778 35.725000 356.666205 
 127.183889 35.725000 367.031322 
 127.182778 35.725111 331.621868 
 127.182889 35.725111 335.596368 
 127.183000 35.725111 337.605172 
 127.183111 35.725111 339.144617 
 127.183333 35.725111 342.961280 
 127.183556 35.725111 355.045009 
 127.183667 35.725111 358.886888 
 127.183778 35.725111 361.564920 
 127.183889 35.725111 373.018467 
 127.182889 35.725111 335.596368 
 127.183000 35.725111 337.605172 
 127.183111 35.725111 339.144617 
 127.183222 35.725111 341.818816 
 127.183444 35.725111 345.377665 
 127.183667 35.725111 358.886888 
 127.183778 35.725111 361.564920 
 127.183889 35.725111 373.018467 
 127.184000 35.725111 380.451777 
 127.182889 35.725222 336.696917 
 127.183000 35.725222 338.386777 
 127.183111 35.725222 341.036831 
 127.183222 35.725222 343.574042 
 127.183444 35.725222 345.696654 
 127.183667 35.725222 363.438135 
 127.183778 35.725222 366.512143 
 127.183889 35.725222 376.729076 
 127.184000 35.725222 381.354169 
 127.182889 35.725333 337.515337 
 127.183000 35.725333 339.900791 
 127.183111 35.725333 344.894756 
 127.183222 35.725333 346.256528 
 127.183444 35.725333 346.427669 
 127.183667 35.725333 366.708972 
 127.183778 35.725333 369.778330 
 127.183889 35.725333 378.661532 
 127.184000 35.725333 382.062437 
 127.183000 35.725333 339.900791 
 127.183111 35.725333 344.894756 
 127.183222 35.725333 346.256528 
 127.183333 35.725333 344.297270 
 127.183556 35.725333 361.216780 
 127.183778 35.725333 369.778330 
 127.183889 35.725333 378.661532 
 127.184000 35.725333 382.062437 
 127.184111 35.725333 382.963046 
 127.183000 35.725444 343.260671 
 127.183111 35.725444 350.228771 
 127.183222 35.725444 349.938874 
 127.183333 35.725444 346.053310 
 127.183556 35.725444 363.439494 
 127.183778 35.725444 371.450878 
 127.183889 35.725444 379.937816 
 127.184000 35.725444 383.344410 
 127.184111 35.725444 385.278394 
 127.183000 35.725556 348.500480 
 127.183111 35.725556 354.493192 
 127.183222 35.725556 353.544029 
 127.183333 35.725556 349.636955 
 127.183556 35.725556 365.231735 
 127.183778 35.725556 372.397959 
 127.183889 35.725556 381.731264 
 127.184000 35.725556 386.219306 
 127.184111 35.725556 390.126539 
 127.183111 35.725556 354.493192 
 127.183222 35.725556 353.544029 
 127.183333 35.725556 349.636955 
 127.183444 35.725556 351.546756 
 127.183667 35.725556 369.466335 
 127.183889 35.725556 381.731264 
 127.184000 35.725556 386.219306 
 127.184111 35.725556 390.126539 
 127.184222 35.725556 402.641994 
 127.183111 35.725667 356.776786 
 127.183222 35.725667 356.224422 
 127.183333 35.725667 354.739951 
 127.183444 35.725667 357.040157 
 127.183667 35.725667 370.307815 
 127.183889 35.725667 385.093074 
 127.184000 35.725667 390.883723 
 127.184111 35.725667 395.989794 
 127.184222 35.725667 407.364637 
 127.183111 35.725778 357.857951 
 127.183222 35.725778 358.113191 
 127.183333 35.725778 359.061483 
 127.183444 35.725778 361.367626 
 127.183667 35.725778 371.267311 
 127.183889 35.725778 389.465104 
 127.184000 35.725778 395.230265 
 127.184111 35.725778 399.945543 
 127.184222 35.725778 409.209881 
 127.183111 35.725889 358.475779 
 127.183222 35.725889 359.630683 
 127.183333 35.725889 361.375537 
 127.183444 35.725889 363.410569 
 127.183667 35.725889 372.070398 
 127.183889 35.725889 392.330755 
 127.184000 35.725889 397.583495 
 127.184111 35.725889 401.818212 
 127.184222 35.725889 409.937405 
 127.183222 35.725889 359.630683 
 127.183333 35.725889 361.375537 
 127.183444 35.725889 363.410569 
 127.183556 35.725889 369.643973 
 127.183778 35.725889 375.773062 
 127.184000 35.725889 397.583495 
 127.184111 35.725889 401.818212 
 127.184222 35.725889 409.937405 
 127.184333 35.725889 412.399101 
 127.183222 35.726000 360.911889 
 127.183333 35.726000 362.381959 
 127.183444 35.726000 364.538132 
 127.183556 35.726000 370.602232 
 127.183778 35.726000 376.893209 
 127.184000 35.726000 398.255207 
 127.184111 35.726000 402.592390 
 127.184222 35.726000 410.246405 
 127.184333 35.726000 412.746894 
 127.183222 35.726111 361.858362 
 127.183333 35.726111 362.979823 
 127.183444 35.726111 366.013759 
 127.183556 35.726111 372.035553 
 127.183778 35.726111 378.750728 
 127.184000 35.726111 397.788204 
 127.184111 35.726111 402.895890 
 127.184222 35.726111 410.281704 
 127.184333 35.726111 413.416548 
 127.183333 35.726111 362.979823 
 127.183444 35.726111 366.013759 
 127.183556 35.726111 372.035553 
 127.183667 35.726111 373.722281 
 127.183889 35.726111 391.964429 
 127.184111 35.726111 402.895890 
 127.184222 35.726111 410.281704 
 127.184333 35.726111 413.416548 
 127.184444 35.726111 416.602971 
 127.183333 35.726222 363.892071 
 127.183444 35.726222 368.937988 
 127.183556 35.726222 374.385216 
 127.183667 35.726222 375.471106 
 127.183889 35.726222 391.200926 
 127.184111 35.726222 403.139407 
 127.184222 35.726222 409.901774 
 127.184333 35.726222 414.349847 
 127.184444 35.726222 417.704027 
 127.183333 35.726333 366.130379 
 127.183444 35.726333 373.566188 
 127.183556 35.726333 377.292179 
 127.183667 35.726333 378.069972 
 127.183889 35.726333 391.016100 
 127.184111 35.726333 403.630319 
 127.184222 35.726333 409.174760 
 127.184333 35.726333 414.974799 
 127.184444 35.726333 418.242256 
 127.183444 35.726333 373.566188 
 127.183556 35.726333 377.292179 
 127.183667 35.726333 378.069972 
 127.183778 35.726333 384.875649 
 127.184000 35.726333 395.273624 
 127.184222 35.726333 409.174760 
 127.184333 35.726333 414.974799 
 127.184444 35.726333 418.242256 
 127.184556 35.726333 418.847894 
 127.183444 35.726445 377.835365 
 127.183556 35.726445 379.597313 
 127.183667 35.726445 380.824658 
 127.183778 35.726445 387.641248 
 127.184000 35.726445 394.873305 
 127.184222 35.726445 408.633844 
 127.184333 35.726445 415.116366 
 127.184444 35.726445 418.566193 
 127.184556 35.726445 419.319168 
 127.183444 35.726556 380.124584 
 127.183556 35.726556 380.880005 
 127.183667 35.726556 383.161133 
 127.183778 35.726556 389.946045 
 127.184000 35.726556 395.187295 
 127.184222 35.726556 408.438790 
 127.184333 35.726556 415.272628 
 127.184444 35.726556 419.076399 
 127.184556 35.726556 420.455192 
 127.183444 35.726667 381.017407 
 127.183556 35.726667 381.606810 
 127.183667 35.726667 385.682690 
 127.183778 35.726667 392.629835 
 127.184000 35.726667 396.242943 
 127.184222 35.726667 408.548643 
 127.184333 35.726667 415.987092 
 127.184444 35.726667 420.170531 
 127.184556 35.726667 422.730555 
 127.183556 35.726667 381.606810 
 127.183667 35.726667 385.682690 
 127.183778 35.726667 392.629835 
 127.183889 35.726667 393.073704 
 127.184111 35.726667 404.916264 
 127.184333 35.726667 415.987092 
 127.184444 35.726667 420.170531 
 127.184556 35.726667 422.730555 
 127.184667 35.726667 432.867453 
 127.183556 35.726778 382.388221 
 127.183667 35.726778 389.404288 
 127.183778 35.726778 395.906379 
 127.183889 35.726778 395.410928 
 127.184111 35.726778 405.571653 
 127.184333 35.726778 417.664409 
 127.184444 35.726778 421.981681 
 127.184556 35.726778 425.814726 
 127.184667 35.726778 436.857887 
 127.183556 35.726889 383.898275 
 127.183667 35.726889 394.032575 
 127.183778 35.726889 398.714843 
 127.183889 35.726889 398.349555 
 127.184111 35.726889 406.573387 
 127.184333 35.726889 419.995948 
 127.184444 35.726889 423.902517 
 127.184556 35.726889 428.463163 
 127.184667 35.726889 438.941003 
 127.183667 35.726889 394.032575 
 127.183778 35.726889 398.714843 
 127.183889 35.726889 398.349555 
 127.184000 35.726889 402.124344 
 127.184222 35.726889 409.835667 
 127.184444 35.726889 423.902517 
 127.184556 35.726889 428.463163 
 127.184667 35.726889 438.941003 
 127.184778 35.726889 443.833554 
 127.183667 35.727000 397.804722 
 127.183778 35.727000 400.408547 
 127.183889 35.727000 401.062714 
 127.184000 35.727000 405.346284 
 127.184222 35.727000 410.394497 
 127.184444 35.727000 425.208094 
 127.184556 35.727000 430.126456 
 127.184667 35.727000 439.993027 
 127.184778 35.727000 444.234332 
 127.183667 35.727111 399.961651 
 127.183778 35.727111 401.457650 
 127.183889 35.727111 404.227498 
 127.184000 35.727111 408.318330 
 127.184222 35.727111 410.610929 
 127.184444 35.727111 425.942081 
 127.184556 35.727111 431.145347 
 127.184667 35.727111 440.649665 
 127.184778 35.727111 444.914262 
 127.183778 35.727111 401.457650 
 127.183889 35.727111 404.227498 
 127.184000 35.727111 408.318330 
 127.184111 35.727111 408.126680 
 127.184333 35.727111 422.603044 
 127.184556 35.727111 431.145347 
 127.184667 35.727111 440.649665 
 127.184778 35.727111 444.914262 
 127.184889 35.727111 452.219831 
 127.183778 35.727222 402.825176 
 127.183889 35.727222 409.733878 
 127.184000 35.727222 412.326368 
 127.184111 35.727222 409.450578 
 127.184333 35.727222 423.228276 
 127.184556 35.727222 431.867315 
 127.184667 35.727222 441.207399 
 127.184778 35.727222 446.284114 
 127.184889 35.727222 457.224327 
 127.183778 35.727333 406.046561 
 127.183889 35.727333 416.989184 
 127.184000 35.727333 417.337394 
 127.184111 35.727333 412.737141 
 127.184333 35.727333 424.782179 
 127.184556 35.727333 432.388276 
 127.184667 35.727333 441.862764 
 127.184778 35.727333 448.890319 
 127.184889 35.727333 461.564610 
 127.183889 35.727333 416.989184 
 127.184000 35.727333 417.337394 
 127.184111 35.727333 412.737141 
 127.184222 35.727333 414.729806 
 127.184444 35.727333 427.448858 
 127.184667 35.727333 441.862764 
 127.184778 35.727333 448.890319 
 127.184889 35.727333 461.564610 
 127.185000 35.727333 468.864718 
 127.183889 35.727445 422.183976 
 127.184000 35.727445 421.616749 
 127.184111 35.727445 418.743593 
 127.184222 35.727445 421.506140 
 127.184444 35.727445 428.843667 
 127.184667 35.727445 442.856018 
 127.184778 35.727445 452.684864 
 127.184889 35.727445 463.765052 
 127.185000 35.727445 468.961535 
 127.183889 35.727556 424.594466 
 127.184000 35.727556 424.393131 
 127.184111 35.727556 424.921215 
 127.184222 35.727556 427.358087 
 127.184444 35.727556 430.002653 
 127.184667 35.727556 444.240040 
 127.184778 35.727556 455.860300 
 127.184889 35.727556 463.825404 
 127.185000 35.727556 468.471641 
 127.183889 35.727667 425.592433 
 127.184000 35.727667 426.201331 
 127.184111 35.727667 428.604375 
 127.184222 35.727667 430.140432 
 127.184444 35.727667 430.646426 
 127.184667 35.727667 445.073800 
 127.184778 35.727667 456.670899 
 127.184889 35.727667 462.617724 
 127.185000 35.727667 467.713986 
 127.184000 35.727667 426.201331 
 127.184111 35.727667 428.604375 
 127.184222 35.727667 430.140432 
 127.184333 35.727667 430.600554 
 127.184556 35.727667 432.524363 
 127.184778 35.727667 456.670899 
 127.184889 35.727667 462.617724 
 127.185000 35.727667 467.713986 
 127.185111 35.727667 473.546565 
 127.184000 35.727778 427.654140 
 127.184111 35.727778 430.607925 
 127.184222 35.727778 432.473813 
 127.184333 35.727778 432.004988 
 127.184556 35.727778 433.415437 
 127.184778 35.727778 455.502280 
 127.184889 35.727778 461.093861 
 127.185000 35.727778 467.350470 
 127.185111 35.727778 476.967904 
 127.184000 35.727889 429.139974 
 127.184111 35.727889 433.375559 
 127.184222 35.727889 438.089948 
 127.184333 35.727889 436.074391 
 127.184556 35.727889 435.239806 
 127.184778 35.727889 453.192563 
 127.184889 35.727889 459.897140 
 127.185000 35.727889 468.525352 
 127.185111 35.727889 481.177679 
 127.184111 35.727889 433.375559 
 127.184222 35.727889 438.089948 
 127.184333 35.727889 436.074391 
 127.184444 35.727889 433.305000 
 127.184667 35.727889 443.329788 
 127.184889 35.727889 459.897140 
 127.185000 35.727889 468.525352 
 127.185111 35.727889 481.177679 
 127.185222 35.727889 486.490084 
 127.184111 35.728000 439.755166 
 127.184222 35.728000 447.218965 
 127.184333 35.728000 443.975519 
 127.184444 35.728000 438.176139 
 127.184667 35.728000 442.345411 
 127.184889 35.728000 459.404522 
 127.185000 35.728000 472.096236 
 127.185111 35.728000 484.333330 
 127.185222 35.728000 487.103958 
 127.184111 35.728111 448.355962 
 127.184222 35.728111 453.696759 
 127.184333 35.728111 451.253806 
 127.184444 35.728111 445.643836 
 127.184667 35.728111 442.224785 
 127.184889 35.728111 460.126123 
 127.185000 35.728111 477.276047 
 127.185111 35.728111 486.061173 
 127.185222 35.728111 487.537776 
 127.184222 35.728111 453.696759 
 127.184333 35.728111 451.253806 
 127.184444 35.728111 445.643836 
 127.184556 35.728111 441.096306 
 127.184778 35.728111 448.162662 
 127.185000 35.728111 477.276047 
 127.185111 35.728111 486.061173 
 127.185222 35.728111 487.537776 
 127.185333 35.728111 489.185942 
 127.184222 35.728222 456.289949 
 127.184333 35.728222 454.943120 
 127.184444 35.728222 452.135618 
 127.184556 35.728222 445.442185 
 127.184778 35.728222 448.783565 
 127.185000 35.728222 482.077092 
 127.185111 35.728222 487.005956 
 127.185222 35.728222 488.129375 
 127.185333 35.728222 490.973710 
 127.184222 35.728333 457.112576 
 127.184333 35.728333 456.640863 
 127.184444 35.728333 457.229571 
 127.184556 35.728333 452.994852 
 127.184778 35.728333 454.779966 
 127.185000 35.728333 485.667902 
 127.185111 35.728333 487.847063 
 127.185222 35.728333 489.206786 
 127.185333 35.728333 493.973068 
 127.184222 35.728445 457.369360 
 127.184333 35.728445 458.305070 
 127.184444 35.728445 463.527161 
 127.184556 35.728445 464.722375 
 127.184778 35.728445 465.393514 
 127.185000 35.728445 488.913930 
 127.185111 35.728445 489.249259 
 127.185222 35.728445 491.225990 
 127.185333 35.728445 498.384281 
 127.184333 35.728445 458.305070 
 127.184444 35.728445 463.527161 
 127.184556 35.728445 464.722375 
 127.184667 35.728445 459.594996 
 127.184889 35.728445 478.474670 
 127.185111 35.728445 489.249259 
 127.185222 35.728445 491.225990 
 127.185333 35.728445 498.384281 
 127.185444 35.728445 508.517172 
 127.184333 35.728556 461.706186 
 127.184444 35.728556 471.948516 
 127.184556 35.728556 475.766248 
 127.184667 35.728556 470.973779 
 127.184889 35.728556 484.722800 
 127.185111 35.728556 491.893216 
 127.185222 35.728556 494.655004 
 127.185333 35.728556 503.624165 
 127.185444 35.728556 511.890271 
 127.184333 35.728667 468.238984 
 127.184444 35.728667 479.535678 
 127.184556 35.728667 481.946878 
 127.184667 35.728667 478.335147 
 127.184889 35.728667 489.025925 
 127.185111 35.728667 495.797152 
 127.185222 35.728667 499.424240 
 127.185333 35.728667 508.450235 
 127.185444 35.728667 514.064294 
 127.184444 35.728667 479.535678 
 127.184556 35.728667 481.946878 
 127.184667 35.728667 478.335147 
 127.184778 35.728667 480.431946 
 127.185000 35.728667 496.451755 
 127.185222 35.728667 499.424240 
 127.185333 35.728667 508.450235 
 127.185444 35.728667 514.064294 
 127.185556 35.728667 516.660387 
 127.184444 35.728778 483.833667 
 127.184556 35.728778 484.580414 
 127.184667 35.728778 482.334422 
 127.184778 35.728778 484.461909 
 127.185000 35.728778 499.323776 
 127.185222 35.728778 504.359442 
 127.185333 35.728778 511.937157 
 127.185444 35.728778 515.465244 
 127.185556 35.728778 517.955328 
 127.184444 35.728889 485.698348 
 127.184556 35.728889 486.054238 
 127.184667 35.728889 486.321543 
 127.184778 35.728889 490.049441 
 127.185000 35.728889 501.472418 
 127.185222 35.728889 508.249693 
 127.185333 35.728889 514.148693 
 127.185444 35.728889 516.610859 
 127.185556 35.728889 519.894106 
 127.184556 35.728889 486.054238 
 127.184667 35.728889 486.321543 
 127.184778 35.728889 490.049441 
 127.184889 35.728889 497.621565 
 127.185111 35.728889 502.433736 
 127.185333 35.728889 514.148693 
 127.185444 35.728889 516.610859 
 127.185556 35.728889 519.894106 
 127.185667 35.728889 528.013659 
 127.184556 35.729000 488.534327 
 127.184667 35.729000 494.245736 
 127.184778 35.729000 499.764604 
 127.184889 35.729000 503.596761 
 127.185111 35.729000 504.710998 
 127.185333 35.729000 515.689424 
 127.185444 35.729000 517.980575 
 127.185556 35.729000 522.951790 
 127.185667 35.729000 533.906847 
 127.184556 35.729111 495.763384 
 127.184667 35.729111 508.105738 
 127.184778 35.729111 512.500484 
 127.184889 35.729111 510.788987 
 127.185111 35.729111 507.853595 
 127.185333 35.729111 517.297165 
 127.185444 35.729111 520.088172 
 127.185556 35.729111 527.554558 
 127.185667 35.729111 540.428954 
 127.184667 35.729111 508.105738 
 127.184778 35.729111 512.500484 
 127.184889 35.729111 510.788987 
 127.185000 35.729111 506.714900 
 127.185222 35.729111 514.325761 
 127.185444 35.729111 520.088172 
 127.185556 35.729111 527.554558 
 127.185667 35.729111 540.428954 
 127.185778 35.729111 551.282648 
 127.184667 35.729222 521.379127 
 127.184778 35.729222 522.652338 
 127.184889 35.729222 518.078052 
 127.185000 35.729222 511.687313 
 127.185222 35.729222 518.948104 
 127.185444 35.729222 523.486660 
 127.185556 35.729222 533.676227 
 127.185667 35.729222 546.390393 
 127.185778 35.729222 554.000081 
 127.184667 35.729333 528.112560 
 127.184778 35.729333 527.917463 
 127.184889 35.729333 524.025329 
 127.185000 35.729333 518.730606 
 127.185222 35.729333 525.002821 
 127.185444 35.729333 528.536732 
 127.185556 35.729333 540.464376 
 127.185667 35.729333 550.914265 
 127.185778 35.729333 555.599046 
 127.184667 35.729444 530.456278 
 127.184778 35.729444 530.131993 
 127.184889 35.729444 528.094238 
 127.185000 35.729444 526.106590 
 127.185222 35.729444 530.453899 
 127.185444 35.729444 534.846089 
 127.185556 35.729444 546.560297 
 127.185667 35.729444 553.860995 
 127.185778 35.729444 556.436488 
 127.184778 35.729444 530.131993 
 127.184889 35.729444 528.094238 
 127.185000 35.729444 526.106590 
 127.185111 35.729444 529.079730 
 127.185333 35.729444 528.584994 
 127.185556 35.729444 546.560297 
 127.185667 35.729444 553.860995 
 127.185778 35.729444 556.436488 
 127.185889 35.729444 556.630844 
 127.184778 35.729555 531.063082 
 127.184889 35.729555 530.648852 
 127.185000 35.729555 531.359882 
 127.185111 35.729555 533.365952 
 127.185333 35.729555 533.132012 
 127.185556 35.729555 550.918144 
 127.185667 35.729555 555.532945 
 127.185778 35.729555 556.763467 
 127.185889 35.729555 556.142485 
 127.184778 35.729667 531.566127 
 127.184889 35.729667 532.327602 
 127.185000 35.729667 534.062358 
 127.185111 35.729667 535.060942 
 127.185333 35.729667 535.681401 
 127.185556 35.729667 553.284370 
 127.185667 35.729667 556.309187 
 127.185778 35.729667 556.703037 
 127.185889 35.729667 555.266516 
 127.184889 35.729667 532.327602 
 127.185000 35.729667 534.062358 
 127.185111 35.729667 535.060942 
 127.185222 35.729667 535.022778 
 127.185444 35.729667 544.467804 
 127.185667 35.729667 556.309187 
 127.185778 35.729667 556.703037 
 127.185889 35.729667 555.266516 
 127.186000 35.729667 552.269884 
 127.184889 35.729778 533.562291 
 127.185000 35.729778 535.184781 
 127.185111 35.729778 535.555960 
 127.185222 35.729778 535.313281 
 127.185444 35.729778 544.723642 
 127.185667 35.729778 556.375799 
 127.185778 35.729778 556.246868 
 127.185889 35.729778 554.033748 
 127.186000 35.729778 550.965008 
 127.184889 35.729889 534.512922 
 127.185000 35.729889 535.585104 
 127.185111 35.729889 535.566120 
 127.185222 35.729889 535.014779 
 127.185444 35.729889 541.940752 
 127.185667 35.729889 555.590749 
 127.185778 35.729889 555.244061 
 127.185889 35.729889 552.557296 
 127.186000 35.729889 549.891027 
 127.185000 35.729889 535.585104 
 127.185111 35.729889 535.566120 
 127.185222 35.729889 535.014779 
 127.185333 35.729889 535.171153 
 127.185556 35.729889 551.974526 
 127.185778 35.729889 555.244061 
 127.185889 35.729889 552.557296 
 127.186000 35.729889 549.891027 
 127.186111 35.729889 548.220550 
 127.185000 35.730000 535.659284 
 127.185111 35.730000 535.303543 
 127.185222 35.730000 534.299479 
 127.185333 35.730000 533.643654 
 127.185556 35.730000 547.682359 
 127.185778 35.730000 553.356457 
 127.185889 35.730000 550.961744 
 127.186000 35.730000 548.951169 
 127.186111 35.730000 547.133927 
 127.185000 35.730111 535.531924 
 127.185111 35.730111 534.778861 
 127.185222 35.730111 533.299422 
 127.185333 35.730111 532.166895 
 127.185556 35.730111 541.027576 
 127.185778 35.730111 549.986241 
 127.185889 35.730111 549.211422 
 127.186000 35.730111 547.904433 
 127.186111 35.730111 545.335251 
 127.185111 35.730111 534.778861 
 127.185222 35.730111 533.299422 
 127.185333 35.730111 532.166895 
 127.185444 35.730111 533.874019 
 127.185667 35.730111 548.104329 
 127.185889 35.730111 549.211422 
 127.186000 35.730111 547.904433 
 127.186111 35.730111 545.335251 
 127.186222 35.730111 538.495603 
 127.185111 35.730222 533.972192 
 127.185222 35.730222 532.227447 
 127.185333 35.730222 531.016861 
 127.185444 35.730222 531.006326 
 127.185667 35.730222 538.933604 
 127.185889 35.730222 546.974995 
 127.186000 35.730222 546.360329 
 127.186111 35.730222 542.173608 
 127.186222 35.730222 531.355581 
 127.185111 35.730333 532.967017 
 127.185222 35.730333 531.302802 
 127.185333 35.730333 530.156919 
 127.185444 35.730333 528.847596 
 127.185667 35.730333 527.434550 
 127.185889 35.730333 543.603503 
 127.186000 35.730333 543.723142 
 127.186111 35.730333 536.835852 
 127.186222 35.730333 521.838325 
 127.185111 35.730444 531.958688 
 127.185222 35.730444 530.591677 
 127.185333 35.730444 529.396034 
 127.185444 35.730444 526.836279 
 127.185667 35.730444 517.587174 
 127.185889 35.730444 538.190715 
 127.186000 35.730444 539.117670 
 127.186111 35.730444 528.724586 
 127.186222 35.730444 511.503329 
 127.185222 35.730444 530.591677 
 127.185333 35.730444 529.396034 
 127.185444 35.730444 526.836279 
 127.185556 35.730444 521.133330 
 127.185778 35.730444 525.871618 
 127.186000 35.730444 539.117670 
 127.186111 35.730444 528.724586 
 127.186222 35.730444 511.503329 
 127.186333 35.730444 497.551776 
 127.185222 35.730555 530.017286 
 127.185333 35.730555 528.512515 
 127.185444 35.730555 524.508087 
 127.185556 35.730555 516.513425 
 127.185778 35.730555 516.784861 
 127.186000 35.730555 531.674910 
 127.186111 35.730555 518.432912 
 127.186222 35.730555 502.595925 
 127.186333 35.730555 493.089524 
 127.185222 35.730667 529.424662 
 127.185333 35.730667 527.255268 
 127.185444 35.730667 521.564616 
 127.185556 35.730667 512.678757 
 127.185778 35.730667 510.295740 
 127.186000 35.730667 521.295655 
 127.186111 35.730667 507.955611 
 127.186222 35.730667 496.255065 
 127.186333 35.730667 490.201443 
 127.185333 35.730667 527.255268 
 127.185444 35.730667 521.564616 
 127.185556 35.730667 512.678757 
 127.185667 35.730667 507.831161 
 127.185889 35.730667 520.233686 
 127.186111 35.730667 507.955611 
 127.186222 35.730667 496.255065 
 127.186333 35.730667 490.201443 
 127.186444 35.730667 485.447271 
 127.185333 35.730778 525.346747 
 127.185444 35.730778 518.006164 
 127.185556 35.730778 509.653792 
 127.185667 35.730778 505.893479 
 127.185889 35.730778 510.366940 
 127.186111 35.730778 499.353100 
 127.186222 35.730778 492.224797 
 127.186333 35.730778 488.018736 
 127.186444 35.730778 482.384312 
 127.185333 35.730889 522.544926 
 127.185444 35.730889 514.205450 
 127.185556 35.730889 507.433422 
 127.185667 35.730889 504.643840 
 127.185889 35.730889 501.789884 
 127.186111 35.730889 493.062850 
 127.186222 35.730889 489.581675 
 127.186333 35.730889 485.838952 
 127.186444 35.730889 478.658273 
 127.185444 35.730889 514.205450 
 127.185556 35.730889 507.433422 
 127.185667 35.730889 504.643840 
 127.185778 35.730889 503.285242 
 127.186000 35.730889 498.231997 
 127.186222 35.730889 489.581675 
 127.186333 35.730889 485.838952 
 127.186444 35.730889 478.658273 
 127.186556 35.730889 469.834522 
 127.185444 35.731000 510.733450 
 127.185556 35.731000 505.861106 
 127.185667 35.731000 503.518687 
 127.185778 35.731000 500.379143 
 127.186000 35.731000 488.133331 
 127.186222 35.731000 487.371560 
 127.186333 35.731000 483.174257 
 127.186444 35.731000 474.585337 
 127.186556 35.731000 466.821538 
 127.185444 35.731111 508.031121 
 127.185556 35.731111 504.678616 
 127.185667 35.731111 502.065396 
 127.185778 35.731111 496.492273 
 127.186000 35.731111 478.870956 
 127.186222 35.731111 484.799041 
 127.186333 35.731111 479.837414 
 127.186444 35.731111 470.766826 
 127.186556 35.731111 464.798832 
 127.185556 35.731111 504.678616 
 127.185667 35.731111 502.065396 
 127.185778 35.731111 496.492273 
 127.185889 35.731111 485.815773 
 127.186111 35.731111 482.784265 
 127.186333 35.731111 479.837414 
 127.186444 35.731111 470.766826 
 127.186556 35.731111 464.798832 
 127.186667 35.731111 463.096103 
 127.185556 35.731222 503.557075 
 127.185667 35.731222 499.793092 
 127.185778 35.731222 490.970676 
 127.185889 35.731222 477.534998 
 127.186111 35.731222 476.439500 
 127.186333 35.731222 475.969430 
 127.186444 35.731222 467.657923 
 127.186556 35.731222 463.613380 
 127.186667 35.731222 463.496587 
 127.185556 35.731333 502.127058 
 127.185667 35.731333 496.183382 
 127.185778 35.731333 483.891282 
 127.185889 35.731333 470.156585 
 127.186111 35.731333 469.510022 
 127.186333 35.731333 471.990922 
 127.186444 35.731333 465.403748 
 127.186556 35.731333 463.095856 
 127.186667 35.731333 464.677036 
 127.185667 35.731333 496.183382 
 127.185778 35.731333 483.891282 
 127.185889 35.731333 470.156585 
 127.186000 35.731333 464.513989 
 127.186222 35.731333 476.256803 
 127.186444 35.731333 465.403748 
 127.186556 35.731333 463.095856 
 127.186667 35.731333 464.677036 
 127.186778 35.731333 469.346875 
 127.185667 35.731444 490.844768 
 127.185778 35.731444 476.214580 
 127.185889 35.731444 464.558629 
 127.186000 35.731444 460.477145 
 127.186222 35.731444 470.115428 
 127.186444 35.731444 463.853305 
 127.186556 35.731444 463.114297 
 127.186667 35.731444 466.482631 
 127.186778 35.731444 471.630741 
 127.185667 35.731555 483.965690 
 127.185778 35.731555 469.356668 
 127.185889 35.731555 460.852368 
 127.186000 35.731555 458.075013 
 127.186222 35.731555 463.327886 
 127.186444 35.731555 462.690807 
 127.186556 35.731555 463.505564 
 127.186667 35.731555 468.378872 
 127.186778 35.731555 473.084067 
 127.185667 35.731667 476.485289 
 127.185778 35.731667 464.168359 
 127.185889 35.731667 458.572329 
 127.186000 35.731667 456.558047 
 127.186222 35.731667 456.212379 
 127.186444 35.731667 461.357476 
 127.186556 35.731667 463.869623 
 127.186667 35.731667 469.636880 
 127.186778 35.731667 473.668484 
 127.185778 35.731667 464.168359 
 127.185889 35.731667 458.572329 
 127.186000 35.731667 456.558047 
 127.186111 35.731667 455.641008 
 127.186333 35.731667 459.739548 
 127.186556 35.731667 463.869623 
 127.186667 35.731667 469.636880 
 127.186778 35.731667 473.668484 
 127.186889 35.731667 475.225610 
 127.185778 35.731778 460.711618 
 127.185889 35.731778 457.174887 
 127.186000 35.731778 455.285878 
 127.186111 35.731778 452.361503 
 127.186333 35.731778 453.060547 
 127.186556 35.731778 463.398238 
 127.186667 35.731778 469.617202 
 127.186778 35.731778 473.413534 
 127.186889 35.731778 475.088009 
 127.185778 35.731889 458.574818 
 127.185889 35.731889 456.206515 
 127.186000 35.731889 453.732972 
 127.186111 35.731889 448.563003 
 127.186333 35.731889 445.941408 
 127.186556 35.731889 461.293545 
 127.186667 35.731889 467.892783 
 127.186778 35.731889 472.215821 
 127.186889 35.731889 474.732903 
 127.185889 35.731889 456.206515 
 127.186000 35.731889 453.732972 
 127.186111 35.731889 448.563003 
 127.186222 35.731889 443.354071 
 127.186444 35.731889 455.003787 
 127.186667 35.731889 467.892783 
 127.186778 35.731889 472.215821 
 127.186889 35.731889 474.732903 
 127.187000 35.731889 476.882987 
 127.185889 35.732000 455.312078 
 127.186000 35.732000 451.506140 
 127.186111 35.732000 444.503069 
 127.186222 35.732000 439.452893 
 127.186444 35.732000 450.845475 
 127.186667 35.732000 464.420275 
 127.186778 35.732000 469.891383 
 127.186889 35.732000 474.286269 
 127.187000 35.732000 477.150297 
 127.185889 35.732111 454.207597 
 127.186000 35.732111 448.534156 
 127.186111 35.732111 440.974474 
 127.186222 35.732111 437.251086 
 127.186444 35.732111 448.176955 
 127.186667 35.732111 460.043268 
 127.186778 35.732111 466.595862 
 127.186889 35.732111 473.864821 
 127.187000 35.732111 477.248026 
 127.186000 35.732111 448.534156 
 127.186111 35.732111 440.974474 
 127.186222 35.732111 437.251086 
 127.186333 35.732111 438.983231 
 127.186556 35.732111 454.676912 
 127.186778 35.732111 466.595862 
 127.186889 35.732111 473.864821 
 127.187000 35.732111 477.248026 
 127.187111 35.732111 477.273012 
 127.186000 35.732222 445.181027 
 127.186111 35.732222 438.432346 
 127.186222 35.732222 436.103985 
 127.186333 35.732222 438.146620 
 127.186556 35.732222 452.495488 
 127.186778 35.732222 463.099322 
 127.186889 35.732222 473.428178 
 127.187000 35.732222 477.162943 
 127.187111 35.732222 476.670147 
 127.186000 35.732333 442.069807 
 127.186111 35.732333 436.825165 
 127.186222 35.732333 435.533506 
 127.186333 35.732333 437.874787 
 127.186556 35.732333 451.091375 
 127.186778 35.732333 460.199151 
 127.186889 35.732333 472.807487 
 127.187000 35.732333 476.853235 
 127.187111 35.732333 475.761629 
 127.186111 35.732333 436.825165 
 127.186222 35.732333 435.533506 
 127.186333 35.732333 437.874787 
 127.186444 35.732333 445.922029 
 127.186667 35.732333 453.705226 
 127.186889 35.732333 472.807487 
 127.187000 35.732333 476.853235 
 127.187111 35.732333 475.761629 
 127.187222 35.732333 473.254954 
 127.186111 35.732444 435.870951 
 127.186222 35.732444 435.270110 
 127.186333 35.732444 437.753044 
 127.186444 35.732444 444.652844 
 127.186667 35.732444 452.243383 
 127.186889 35.732444 471.780673 
 127.187000 35.732444 476.192352 
 127.187111 35.732444 474.625661 
 127.187222 35.732444 472.671613 
 127.186111 35.732556 435.323287 
 127.186222 35.732556 435.185171 
 127.186333 35.732556 437.528845 
 127.186444 35.732556 442.718748 
 127.186667 35.732556 451.179344 
 127.186889 35.732556 470.025629 
 127.187000 35.732556 474.898450 
 127.187111 35.732556 473.439180 
 127.187222 35.732556 472.306776 
 127.186222 35.732556 435.185171 
 127.186333 35.732556 437.528845 
 127.186444 35.732556 442.718748 
 127.186556 35.732556 447.974990 
 127.186778 35.732556 456.167690 
 127.187000 35.732556 474.898450 
 127.187111 35.732556 473.439180 
 127.187222 35.732556 472.306776 
 127.187333 35.732556 472.135656 
 127.186222 35.732667 435.215699 
 127.186333 35.732667 437.109520 
 127.186444 35.732667 440.533950 
 127.186556 35.732667 445.610018 
 127.186778 35.732667 454.548886 
 127.187000 35.732667 472.445997 
 127.187111 35.732667 472.259421 
 127.187222 35.732667 472.062189 
 127.187333 35.732667 472.197426 
 127.186222 35.732778 435.312605 
 127.186333 35.732778 436.622796 
 127.186444 35.732778 438.785828 
 127.186556 35.732778 443.324876 
 127.186778 35.732778 453.161731 
 127.187000 35.732778 468.423052 
 127.187111 35.732778 470.829556 
 127.187222 35.732778 471.823472 
 127.187333 35.732778 472.340103 
 127.186333 35.732889 436.244697 
 127.186444 35.732889 437.800103 
 127.186556 35.732889 442.119629 
 127.186667 35.732889 447.842813 
 127.186889 35.732889 459.300540 
 127.187111 35.732889 468.734864 
 127.187222 35.732889 471.480520 
 127.187333 35.732889 472.560180 
 127.187444 35.732889 473.408627 
 127.186333 35.733000 436.035925 
 127.186444 35.733000 437.569663 
 127.186556 35.733000 442.475252 
 127.186667 35.733000 447.972799 
 127.186889 35.733000 457.953241 
 127.187111 35.733000 466.020966 
 127.187222 35.733000 470.995581 
 127.187333 35.733000 472.844839 
 127.187444 35.733000 474.093707 
 127.186333 35.733111 435.994908 
 127.186444 35.733111 438.052057 
 127.186556 35.733111 443.968443 
 127.186667 35.733111 448.602015 
 127.186889 35.733111 457.662657 
 127.187111 35.733111 463.592610 
 127.187222 35.733111 470.509422 
 127.187333 35.733111 473.227703 
 127.187444 35.733111 475.228322 
 127.186444 35.733111 438.052057 
 127.186556 35.733111 443.968443 
 127.186667 35.733111 448.602015 
 127.186778 35.733111 452.306299 
 127.187000 35.733111 459.438347 
 127.187222 35.733111 470.509422 
 127.187333 35.733111 473.227703 
 127.187444 35.733111 475.228322 
 127.187556 35.733111 480.061995 
 127.186444 35.733222 439.222511 
 127.186556 35.733222 445.742701 
 127.186667 35.733222 449.338921 
 127.186778 35.733222 453.179631 
 127.187000 35.733222 458.942686 
 127.187222 35.733222 470.239337 
 127.187333 35.733222 473.837255 
 127.187444 35.733222 477.086722 
 127.187556 35.733222 483.705827 
 127.186444 35.733333 440.956844 
 127.186556 35.733333 447.249258 
 127.186667 35.733333 450.416226 
 127.186778 35.733333 455.424004 
 127.187000 35.733333 459.119882 
 127.187222 35.733333 470.376680 
 127.187333 35.733333 474.898124 
 127.187444 35.733333 479.852639 
 127.187556 35.733333 487.473487 
 127.186556 35.733333 447.249258 
 127.186667 35.733333 450.416226 
 127.186778 35.733333 455.424004 
 127.186889 35.733333 459.022924 
 127.187111 35.733333 461.741520 
 127.187333 35.733333 474.898124 
 127.187444 35.733333 479.852639 
 127.187556 35.733333 487.473487 
 127.187667 35.733333 493.445811 
 127.186556 35.733444 448.474969 
 127.186667 35.733444 452.485021 
 127.186778 35.733444 459.218506 
 127.186889 35.733444 461.437772 
 127.187111 35.733444 462.771160 
 127.187333 35.733444 476.733733 
 127.187444 35.733444 483.374249 
 127.187556 35.733444 490.658633 
 127.187667 35.733444 495.301695 
 127.186556 35.733556 449.768252 
 127.186667 35.733556 456.012565 
 127.186778 35.733556 463.144802 
 127.186889 35.733556 465.073948 
 127.187111 35.733556 467.208223 
 127.187333 35.733556 479.735771 
 127.187444 35.733556 487.087631 
 127.187556 35.733556 492.986966 
 127.187667 35.733556 496.881189 
 127.186667 35.733556 456.012565 
 127.186778 35.733556 463.144802 
 127.186889 35.733556 465.073948 
 127.187000 35.733556 464.990275 
 127.187222 35.733556 474.436615 
 127.187444 35.733556 487.087631 
 127.187556 35.733556 492.986966 
 127.187667 35.733556 496.881189 
 127.187778 35.733556 502.382778 
 127.186667 35.733667 460.197873 
 127.186778 35.733667 465.931105 
 127.186889 35.733667 469.223432 
 127.187000 35.733667 473.141643 
 127.187222 35.733667 481.307659 
 127.187444 35.733667 490.310619 
 127.187556 35.733667 494.596227 
 127.187667 35.733667 498.470495 
 127.187778 35.733667 504.091900 
 127.186667 35.733778 463.608114 
 127.186778 35.733778 467.887567 
 127.186889 35.733778 473.611428 
 127.187000 35.733778 480.703789 
 127.187222 35.733778 489.380367 
 127.187444 35.733778 492.768401 
 127.187556 35.733778 495.826858 
 127.187667 35.733778 500.192111 
 127.187778 35.733778 505.347687 
 127.186778 35.733778 467.887567 
 127.186889 35.733778 473.611428 
 127.187000 35.733778 480.703789 
 127.187111 35.733778 485.364670 
 127.187333 35.733778 489.229481 
 127.187556 35.733778 495.826858 
 127.187667 35.733778 500.192111 
 127.187778 35.733778 505.347687 
 127.187889 35.733778 506.803738 
 127.186778 35.733889 469.893176 
 127.186889 35.733889 478.015875 
 127.187000 35.733889 484.859757 
 127.187111 35.733889 489.720825 
 127.187333 35.733889 493.617722 
 127.187556 35.733889 497.080935 
 127.187667 35.733889 501.971935 
 127.187778 35.733889 506.106815 
 127.187889 35.733889 506.205243 
 127.186778 35.734000 472.766905 
 127.186889 35.734000 481.806951 
 127.187000 35.734000 486.941689 
 127.187111 35.734000 491.768728 
 127.187333 35.734000 496.503931 
 127.187556 35.734000 498.997719 
 127.187667 35.734000 503.654552 
 127.187778 35.734000 506.329735 
 127.187889 35.734000 504.487024 
 127.186889 35.734000 481.806951 
 127.187000 35.734000 486.941689 
 127.187111 35.734000 491.768728 
 127.187222 35.734000 495.735388 
 127.187444 35.734000 497.163197 
 127.187667 35.734000 503.654552 
 127.187778 35.734000 506.329735 
 127.187889 35.734000 504.487024 
 127.188000 35.734000 495.314774 
 127.186889 35.734111 484.522484 
 127.187000 35.734111 488.385990 
 127.187111 35.734111 493.268703 
 127.187222 35.734111 496.890229 
 127.187444 35.734111 501.664486 
 127.187667 35.734111 505.084249 
 127.187778 35.734111 505.781157 
 127.187889 35.734111 500.891575 
 127.188000 35.734111 488.380521 
 127.186889 35.734222 486.428173 
 127.187000 35.734222 489.937695 
 127.187111 35.734222 494.931452 
 127.187222 35.734222 498.676609 
 127.187444 35.734222 508.076462 
 127.187667 35.734222 506.031805 
 127.187778 35.734222 503.859155 
 127.187889 35.734222 495.206467 
 127.188000 35.734222 482.832506 
 127.187000 35.734222 489.937695 
 127.187111 35.734222 494.931452 
 127.187222 35.734222 498.676609 
 127.187333 35.734222 502.442504 
 127.187556 35.734222 508.327188 
 127.187778 35.734222 503.859155 
 127.187889 35.734222 495.206467 
 127.188000 35.734222 482.832506 
 127.188111 35.734222 477.414702 
 127.187000 35.734333 491.966420 
 127.187111 35.734333 497.323519 
 127.187222 35.734333 502.334381 
 127.187333 35.734333 507.937053 
 127.187556 35.734333 512.530605 
 127.187778 35.734333 500.072876 
 127.187889 35.734333 489.122629 
 127.188000 35.734333 479.507601 
 127.188111 35.734333 475.891322 
 127.187000 35.734444 494.701483 
 127.187111 35.734444 501.332383 
 127.187222 35.734444 508.615276 
 127.187333 35.734444 514.406299 
 127.187556 35.734444 513.889264 
 127.187778 35.734444 495.892680 
 127.187889 35.734444 485.157332 
 127.188000 35.734444 477.671845 
 127.188111 35.734444 473.932939 
 127.187000 35.734556 498.466011 
 127.187111 35.734556 507.593590 
 127.187222 35.734556 516.150245 
 127.187333 35.734556 519.820186 
 127.187556 35.734556 513.823009 
 127.187778 35.734556 493.597018 
 127.187889 35.734556 483.969915 
 127.188000 35.734556 476.279896 
 127.188111 35.734556 470.687799 
 127.187111 35.734556 507.593590 
 127.187222 35.734556 516.150245 
 127.187333 35.734556 519.820186 
 127.187444 35.734556 518.136962 
 127.187667 35.734556 503.292607 
 127.187889 35.734556 483.969915 
 127.188000 35.734556 476.279896 
 127.188111 35.734556 470.687799 
 127.188222 35.734556 463.433813 
 127.187111 35.734667 514.969566 
 127.187222 35.734667 522.254501 
 127.187333 35.734667 523.246336 
 127.187444 35.734667 518.907067 
 127.187667 35.734667 501.791721 
 127.187889 35.734667 484.502078 
 127.188000 35.734667 474.416103 
 127.188111 35.734667 466.074276 
 127.188222 35.734667 458.880300 
 127.187111 35.734778 521.222328 
 127.187222 35.734778 525.976673 
 127.187333 35.734778 524.957145 
 127.187444 35.734778 518.643408 
 127.187667 35.734778 500.060890 
 127.187889 35.734778 485.266142 
 127.188000 35.734778 471.420744 
 127.188111 35.734778 461.273609 
 127.188222 35.734778 455.310534 
 127.187222 35.734778 525.976673 
 127.187333 35.734778 524.957145 
 127.187444 35.734778 518.643408 
 127.187556 35.734778 511.691844 
 127.187778 35.734778 492.225889 
 127.188000 35.734778 471.420744 
 127.188111 35.734778 461.273609 
 127.188222 35.734778 455.310534 
 127.188333 35.734778 442.637692 
 127.187222 35.734889 527.874674 
 127.187333 35.734889 525.089990 
 127.187444 35.734889 515.938614 
 127.187556 35.734889 508.172131 
 127.187778 35.734889 490.343628 
 127.188000 35.734889 467.173117 
 127.188111 35.734889 457.322449 
 127.188222 35.734889 452.238920 
 127.188333 35.734889 438.522555 
 127.187222 35.735000 528.584717 
 127.187333 35.735000 522.563277 
 127.187444 35.735000 507.815042 
 127.187556 35.735000 500.190084 
 127.187778 35.735000 484.723280 
 127.188000 35.735000 461.343037 
 127.188111 35.735000 453.348402 
 127.188222 35.735000 448.878782 
 127.188333 35.735000 435.487038 
 127.187333 35.735000 522.563277 
 127.187444 35.735000 507.815042 
 127.187556 35.735000 500.190084 
 127.187667 35.735000 490.851424 
 127.187889 35.735000 480.389116 
 127.188111 35.735000 453.348402 
 127.188222 35.735000 448.878782 
 127.188333 35.735000 435.487038 
 127.188444 35.735000 427.446700 
 127.187333 35.735111 514.543101 
 127.187444 35.735111 494.872063 
 127.187556 35.735111 488.592702 
 127.187667 35.735111 478.722281 
 127.187889 35.735111 469.302774 
 127.188111 35.735111 446.716122 
 127.188222 35.735111 443.593866 
 127.188333 35.735111 431.180742 
 127.188444 35.735111 419.311540 
 127.187333 35.735222 500.642484 
 127.187444 35.735222 484.605477 
 127.187556 35.735222 479.114983 
 127.187667 35.735222 463.675358 
 127.187889 35.735222 452.873005 
 127.188111 35.735222 435.046625 
 127.188222 35.735222 433.715128 
 127.188333 35.735222 422.072170 
 127.188444 35.735222 407.348685 
 127.187444 35.735222 484.605477 
 127.187556 35.735222 479.114983 
 127.187667 35.735222 463.675358 
 127.187778 35.735222 455.252059 
 127.188000 35.735222 438.063607 
 127.188222 35.735222 433.715128 
 127.188333 35.735222 422.072170 
 127.188444 35.735222 407.348685 
 127.188556 35.735222 395.483834 
 127.187444 35.735333 479.558450 
 127.187556 35.735333 473.375270 
 127.187667 35.735333 451.916345 
 127.187778 35.735333 442.599535 
 127.188000 35.735333 424.191232 
 127.188222 35.735333 420.677276 
 127.188333 35.735333 409.148207 
 127.188444 35.735333 398.574452 
 127.188556 35.735333 393.083524 
 127.187444 35.735444 477.338098 
 127.187556 35.735444 469.261105 
 127.187667 35.735444 444.610833 
 127.187778 35.735444 436.559580 
 127.188000 35.735444 416.113644 
 127.188222 35.735444 411.533198 
 127.188333 35.735444 401.514581 
 127.188444 35.735444 395.513662 
 127.188556 35.735444 390.946022 
 127.187556 35.735444 469.261105 
 127.187667 35.735444 444.610833 
 127.187778 35.735444 436.559580 
 127.187889 35.735444 432.829558 
 127.188111 35.735444 412.689685 
 127.188333 35.735444 401.514581 
 127.188444 35.735444 395.513662 
 127.188556 35.735444 390.946022 
 127.188667 35.735444 385.189776 
 127.187556 35.735556 464.898984 
 127.187667 35.735556 440.024582 
 127.187778 35.735556 434.356714 
 127.187889 35.735556 430.565383 
 127.188111 35.735556 409.195685 
 127.188333 35.735556 400.231286 
 127.188444 35.735556 395.285848 
 127.188556 35.735556 388.899654 
 127.188667 35.735556 384.432917 
 127.187556 35.735667 459.237283 
 127.187667 35.735667 437.120170 
 127.187778 35.735667 434.070188 
 127.187889 35.735667 430.893089 
 127.188111 35.735667 409.296064 
 127.188333 35.735667 403.033226 
 127.188444 35.735667 397.478302 
 127.188556 35.735667 388.056868 
 127.188667 35.735667 385.049289 
 127.187667 35.735667 437.120170 
 127.187778 35.735667 434.070188 
 127.187889 35.735667 430.893089 
 127.188000 35.735667 415.169803 
 127.188222 35.735667 407.455597 
 127.188444 35.735667 397.478302 
 127.188556 35.735667 388.056868 
 127.188667 35.735667 385.049289 
 127.188778 35.735667 396.189644 
 127.187667 35.735778 435.690622 
 127.187778 35.735778 434.855109 
 127.187889 35.735778 432.467443 
 127.188000 35.735778 419.741988 
 127.188222 35.735778 409.407550 
 127.188444 35.735778 404.010778 
 127.188556 35.735778 389.787203 
 127.188667 35.735778 387.187521 
 127.188778 35.735778 399.885289 
 127.187667 35.735889 435.629827 
 127.187778 35.735889 435.850165 
 127.187889 35.735889 433.765579 
 127.188000 35.735889 424.008119 
 127.188222 35.735889 413.808442 
 127.188444 35.735889 413.466613 
 127.188556 35.735889 395.342694 
 127.188667 35.735889 391.327042 
 127.188778 35.735889 402.838971 
 127.187778 35.735889 435.850165 
 127.187889 35.735889 433.765579 
 127.188000 35.735889 424.008119 
 127.188111 35.735889 417.806363 
 127.188333 35.735889 418.238099 
 127.188556 35.735889 395.342694 
 127.188667 35.735889 391.327042 
 127.188778 35.735889 402.838971 
 127.188889 35.735889 406.038510 
 127.187778 35.736000 436.476620 
 127.187889 35.736000 434.441929 
 127.188000 35.736000 426.620779 
 127.188111 35.736000 422.523074 
 127.188333 35.736000 423.116471 
 127.188556 35.736000 404.558729 
 127.188667 35.736000 397.531480 
 127.188778 35.736000 404.728579 
 127.188889 35.736000 405.487716 
 127.187778 35.736111 436.781751 
 127.187889 35.736111 435.047867 
 127.188000 35.736111 429.196861 
 127.188111 35.736111 427.069761 
 127.188333 35.736111 425.355515 
 127.188556 35.736111 412.991383 
 127.188667 35.736111 403.782748 
 127.188778 35.736111 405.564036 
 127.188889 35.736111 403.654795 
 127.187778 35.736222 436.995146 
 127.187889 35.736222 436.547362 
 127.188000 35.736222 434.694421 
 127.188111 35.736222 434.579407 
 127.188333 35.736222 427.332442 
 127.188556 35.736222 416.096140 
 127.188667 35.736222 407.105440 
 127.188778 35.736222 405.428815 
 127.188889 35.736222 399.482727 
 127.187889 35.736222 436.547362 
 127.188000 35.736222 434.694421 
 127.188111 35.736222 434.579407 
 127.188222 35.736222 432.243981 
 127.188444 35.736222 424.198608 
 127.188667 35.736222 407.105440 
 127.188778 35.736222 405.428815 
 127.188889 35.736222 399.482727 
 127.189000 35.736222 386.071569 
 127.187889 35.736333 440.591267 
 127.188000 35.736333 444.385752 
 127.188111 35.736333 444.292815 
 127.188222 35.736333 436.762339 
 127.188444 35.736333 424.364662 
 127.188667 35.736333 407.689730 
 127.188778 35.736333 404.567123 
 127.188889 35.736333 393.647867 
 127.189000 35.736333 382.205782 
 127.187889 35.736444 447.449200 
 127.188000 35.736444 452.225787 
 127.188111 35.736444 449.914694 
 127.188222 35.736444 438.677779 
 127.188444 35.736444 424.965949 
 127.188667 35.736444 407.447876 
 127.188778 35.736444 403.742920 
 127.188889 35.736444 389.678977 
 127.189000 35.736444 381.255495 
 127.188000 35.736444 452.225787 
 127.188111 35.736444 449.914694 
 127.188222 35.736444 438.677779 
 127.188333 35.736444 432.968168 
 127.188556 35.736444 412.940409 
 127.188778 35.736444 403.742920 
 127.188889 35.736444 389.678977 
 127.189000 35.736444 381.255495 
 127.189111 35.736444 381.505301 
 127.188000 35.736556 455.263000 
 127.188111 35.736556 451.676737 
 127.188222 35.736556 439.360710 
 127.188333 35.736556 434.983893 
 127.188556 35.736556 411.883601 
 127.188778 35.736556 403.936476 
 127.188889 35.736556 389.639398 
 127.189000 35.736556 382.428386 
 127.189111 35.736556 384.639346 
 127.188000 35.736667 456.058158 
 127.188111 35.736667 452.086224 
 127.188222 35.736667 439.575741 
 127.188333 35.736667 436.229230 
 127.188556 35.736667 413.327067 
 127.188778 35.736667 406.525016 
 127.188889 35.736667 394.543906 
 127.189000 35.736667 386.455829 
 127.189111 35.736667 390.960125 
 127.188111 35.736667 452.086224 
 127.188222 35.736667 439.575741 
 127.188333 35.736667 436.229230 
 127.188444 35.736667 431.037411 
 127.188667 35.736667 408.250603 
 127.188889 35.736667 394.543906 
 127.189000 35.736667 386.455829 
 127.189111 35.736667 390.960125 
 127.189222 35.736667 409.489563 
 127.188111 35.736778 451.877024 
 127.188222 35.736778 439.409658 
 127.188333 35.736778 437.034347 
 127.188444 35.736778 434.741159 
 127.188667 35.736778 411.951989 
 127.188889 35.736778 405.938701 
 127.189000 35.736778 395.408495 
 127.189111 35.736778 400.751926 
 127.189222 35.736778 415.593447 
 127.188111 35.736889 450.638703 
 127.188222 35.736889 438.858347 
 127.188333 35.736889 437.853398 
 127.188444 35.736889 438.428794 
 127.188667 35.736889 423.356840 
 127.188889 35.736889 421.397744 
 127.189000 35.736889 409.662726 
 127.189111 35.736889 411.156005 
 127.189222 35.736889 418.889712 
 127.188222 35.736889 438.858347 
 127.188333 35.736889 437.853398 
 127.188444 35.736889 438.428794 
 127.188556 35.736889 432.054507 
 127.188778 35.736889 425.979603 
 127.189000 35.736889 409.662726 
 127.189111 35.736889 411.156005 
 127.189222 35.736889 418.889712 
 127.189333 35.736889 421.743229 
 127.188222 35.737000 438.424655 
 127.188333 35.737000 439.967987 
 127.188444 35.737000 444.674663 
 127.188556 35.737000 448.608131 
 127.188778 35.737000 437.507352 
 127.189000 35.737000 424.012616 
 127.189111 35.737000 418.766175 
 127.189222 35.737000 420.685753 
 127.189333 35.737000 423.538458 
 127.188222 35.737111 438.833027 
 127.188333 35.737111 445.235732 
 127.188444 35.737111 453.492382 
 127.188556 35.737111 459.637580 
 127.188778 35.737111 445.070674 
 127.189000 35.737111 433.341578 
 127.189111 35.737111 423.498405 
 127.189222 35.737111 422.243283 
 127.189333 35.737111 426.610336 
 127.188333 35.737111 445.235732 
 127.188444 35.737111 453.492382 
 127.188556 35.737111 459.637580 
 127.188667 35.737111 456.316644 
 127.188889 35.737111 440.316729 
 127.189111 35.737111 423.498405 
 127.189222 35.737111 422.243283 
 127.189333 35.737111 426.610336 
 127.189444 35.737111 436.436950 
 127.188333 35.737222 452.523599 
 127.188444 35.737222 460.037790 
 127.188556 35.737222 464.191819 
 127.188667 35.737222 462.560835 
 127.188889 35.737222 444.302106 
 127.189111 35.737222 427.339198 
 127.189222 35.737222 424.720943 
 127.189333 35.737222 431.021045 
 127.189444 35.737222 439.159142 
 127.188333 35.737333 458.107122 
 127.188444 35.737333 463.201508 
 127.188556 35.737333 465.920460 
 127.188667 35.737333 466.117140 
 127.188889 35.737333 449.785534 
 127.189111 35.737333 432.380192 
 127.189222 35.737333 429.268385 
 127.189333 35.737333 435.666531 
 127.189444 35.737333 440.045950 
 127.188444 35.737333 463.201508 
 127.188556 35.737333 465.920460 
 127.188667 35.737333 466.117140 
 127.188778 35.737333 459.999121 
 127.189000 35.737333 441.830862 
 127.189222 35.737333 429.268385 
 127.189333 35.737333 435.666531 
 127.189444 35.737333 440.045950 
 127.189556 35.737333 435.443519 
 127.188444 35.737444 464.645926 
 127.188556 35.737444 466.806853 
 127.188667 35.737444 469.666469 
 127.188778 35.737444 471.085432 
 127.189000 35.737444 445.817221 
 127.189222 35.737444 435.700730 
 127.189333 35.737444 439.035462 
 127.189444 35.737444 439.292648 
 127.189556 35.737444 431.067916 
 127.188444 35.737556 465.503364 
 127.188556 35.737556 467.611396 
 127.188667 35.737556 473.820055 
 127.188778 35.737556 479.667085 
 127.189000 35.737556 449.634150 
 127.189222 35.737556 441.400983 
 127.189333 35.737556 440.584980 
 127.189444 35.737556 436.801973 
 127.189556 35.737556 424.833499 
 127.188556 35.737556 467.611396 
 127.188667 35.737556 473.820055 
 127.188778 35.737556 479.667085 
 127.188889 35.737556 470.084665 
 127.189111 35.737556 443.693679 
 127.189333 35.737556 440.584980 
 127.189444 35.737556 436.801973 
 127.189556 35.737556 424.833499 
 127.189667 35.737556 409.066382 
 127.188556 35.737667 468.565057 
 127.188667 35.737667 476.982373 
 127.188778 35.737667 482.082911 
 127.188889 35.737667 474.709528 
 127.189111 35.737667 445.962148 
 127.189333 35.737667 440.539831 
 127.189444 35.737667 432.167912 
 127.189556 35.737667 417.525388 
 127.189667 35.737667 405.424014 
 127.188556 35.737778 469.097723 
 127.188667 35.737778 475.477158 
 127.188778 35.737778 477.710729 
 127.188889 35.737778 471.984193 
 127.189111 35.737778 446.702760 
 127.189333 35.737778 439.334634 
 127.189444 35.737778 425.397793 
 127.189556 35.737778 410.831166 
 127.189667 35.737778 402.985871 
 127.188667 35.737778 475.477158 
 127.188778 35.737778 477.710729 
 127.188889 35.737778 471.984193 
 127.189000 35.737778 451.095516 
 127.189222 35.737778 445.749694 
 127.189444 35.737778 425.397793 
 127.189556 35.737778 410.831166 
 127.189667 35.737778 402.985871 
 127.189778 35.737778 399.982220 
 127.188667 35.737889 467.274151 
 127.188778 35.737889 467.803851 
 127.188889 35.737889 463.992785 
 127.189000 35.737889 449.720008 
 127.189222 35.737889 446.271472 
 127.189444 35.737889 417.980412 
 127.189556 35.737889 406.063347 
 127.189667 35.737889 401.184220 
 127.189778 35.737889 397.796210 
 127.188667 35.738000 457.286291 
 127.188778 35.738000 457.473150 
 127.188889 35.738000 455.352303 
 127.189000 35.738000 448.191700 
 127.189222 35.738000 446.836512 
 127.189444 35.738000 412.755385 
 127.189556 35.738000 403.337450 
 127.189667 35.738000 399.368828 
 127.189778 35.738000 394.904935 
 127.188778 35.738111 451.045268 
 127.188889 35.738111 449.825421 
 127.189000 35.738111 447.121205 
 127.189111 35.738111 447.361938 
 127.189333 35.738111 439.671875 
 127.189556 35.738111 402.129219 
 127.189667 35.738111 397.231321 
 127.189778 35.738111 392.303281 
 127.189889 35.738111 390.933989 
 127.188778 35.738222 448.171817 
 127.188889 35.738222 447.379762 
 127.189000 35.738222 446.675569 
 127.189111 35.738222 447.885687 
 127.189333 35.738222 445.635999 
 127.189556 35.738222 402.495584 
 127.189667 35.738222 395.309372 
 127.189778 35.738222 390.950918 
 127.189889 35.738222 392.128365 
 127.188778 35.738333 447.053547 
 127.188889 35.738333 446.521830 
 127.189000 35.738333 446.636254 
 127.189111 35.738333 448.606823 
 127.189333 35.738333 451.286163 
 127.189556 35.738333 406.254633 
 127.189667 35.738333 395.070018 
 127.189778 35.738333 391.348680 
 127.189889 35.738333 395.708334 
 127.188889 35.738333 446.521830 
 127.189000 35.738333 446.636254 
 127.189111 35.738333 448.606823 
 127.189222 35.738333 452.436479 
 127.189444 35.738333 431.079547 
 127.189667 35.738333 395.070018 
 127.189778 35.738333 391.348680 
 127.189889 35.738333 395.708334 
 127.190000 35.738333 407.538938 
 127.188889 35.738444 446.292915 
 127.189000 35.738444 446.824817 
 127.189111 35.738444 449.516462 
 127.189222 35.738444 454.000934 
 127.189444 35.738444 443.825751 
 127.189667 35.738444 398.958596 
 127.189778 35.738444 394.262142 
 127.189889 35.738444 401.523600 
 127.190000 35.738444 411.933131 
 127.188889 35.738556 446.323218 
 127.189000 35.738556 447.230208 
 127.189111 35.738556 450.685834 
 127.189222 35.738556 455.099526 
 127.189444 35.738556 451.679636 
 127.189667 35.738556 409.898507 
 127.189778 35.738556 401.034346 
 127.189889 35.738556 408.133804 
 127.190000 35.738556 414.165025 
 127.189000 35.738556 447.230208 
 127.189111 35.738556 450.685834 
 127.189222 35.738556 455.099526 
 127.189333 35.738556 456.203884 
 127.189556 35.738556 432.008242 
 127.189778 35.738556 401.034346 
 127.189889 35.738556 408.133804 
 127.190000 35.738556 414.165025 
 127.190111 35.738556 407.166996 
 127.189000 35.738667 447.956298 
 127.189111 35.738667 452.150985 
 127.189222 35.738667 456.179799 
 127.189333 35.738667 458.014308 
 127.189556 35.738667 443.302466 
 127.189778 35.738667 411.960662 
 127.189889 35.738667 413.656773 
 127.190000 35.738667 414.834907 
 127.190111 35.738667 405.027095 
 127.189000 35.738778 449.177161 
 127.189111 35.738778 453.877559 
 127.189222 35.738778 457.784889 
 127.189333 35.738778 461.137960 
 127.189556 35.738778 448.988815 
 127.189778 35.738778 423.891982 
 127.189889 35.738778 417.652966 
 127.190000 35.738778 414.807982 
 127.190111 35.738778 403.628406 
 127.189111 35.738778 453.877559 
 127.189222 35.738778 457.784889 
 127.189333 35.738778 461.137960 
 127.189444 35.738778 460.468685 
 127.189667 35.738778 437.947006 
 127.189889 35.738778 417.652966 
 127.190000 35.738778 414.807982 
 127.190111 35.738778 403.628406 
 127.190222 35.738778 398.531802 
 127.189111 35.738889 455.907446 
 127.189222 35.738889 460.678227 
 127.189333 35.738889 466.362532 
 127.189444 35.738889 465.505849 
 127.189667 35.738889 443.690264 
 127.189889 35.738889 421.087447 
 127.190000 35.738889 415.106640 
 127.190111 35.738889 403.498098 
 127.190222 35.738889 399.254338 
 127.189111 35.739000 458.584569 
 127.189222 35.739000 465.559643 
 127.189333 35.739000 473.066643 
 127.189444 35.739000 470.837338 
 127.189667 35.739000 446.338432 
 127.189889 35.739000 425.175801 
 127.190000 35.739000 417.174280 
 127.190111 35.739000 405.522320 
 127.190222 35.739000 401.267593 
 127.189222 35.739000 465.559643 
 127.189333 35.739000 473.066643 
 127.189444 35.739000 470.837338 
 127.189556 35.739000 455.624374 
 127.189778 35.739000 438.838810 
 127.190000 35.739000 417.174280 
 127.190111 35.739000 405.522320 
 127.190222 35.739000 401.267593 
 127.190333 35.739000 403.536227 
 127.189222 35.739111 472.173030 
 127.189333 35.739111 479.361370 
 127.189444 35.739111 475.589735 
 127.189556 35.739111 459.121561 
 127.189778 35.739111 442.742364 
 127.190000 35.739111 421.771641 
 127.190111 35.739111 410.741772 
 127.190222 35.739111 405.187040 
 127.190333 35.739111 406.420318 
 127.189222 35.739222 478.807260 
 127.189333 35.739222 483.874061 
 127.189444 35.739222 479.291084 
 127.189556 35.739222 462.905205 
 127.189778 35.739222 446.481318 
 127.190000 35.739222 426.520175 
 127.190111 35.739222 417.864974 
 127.190222 35.739222 409.819263 
 127.190333 35.739222 408.063614 
 127.189333 35.739222 483.874061 
 127.189444 35.739222 479.291084 
 127.189556 35.739222 462.905205 
 127.189667 35.739222 451.504430 
 127.189889 35.739222 434.122662 
 127.190111 35.739222 417.864974 
 127.190222 35.739222 409.819263 
 127.190333 35.739222 408.063614 
 127.190444 35.739222 408.167385 
 127.189333 35.739333 486.614188 
 127.189444 35.739333 481.914039 
 127.189556 35.739333 466.762053 
 127.189667 35.739333 456.321769 
 127.189889 35.739333 437.249990 
 127.190111 35.739333 423.068505 
 127.190222 35.739333 412.917832 
 127.190333 35.739333 408.824962 
 127.190444 35.739333 408.625981 
 127.189333 35.739445 488.117343 
 127.189444 35.739445 483.512117 
 127.189556 35.739445 470.263523 
 127.189667 35.739445 462.516805 
 127.189889 35.739445 440.561410 
 127.190111 35.739445 425.627195 
 127.190222 35.739445 414.706007 
 127.190333 35.739445 409.520579 
 127.190444 35.739445 409.488273 
 127.189444 35.739445 483.512117 
 127.189556 35.739445 470.263523 
 127.189667 35.739445 462.516805 
 127.189778 35.739445 457.133141 
 127.190000 35.739445 430.891803 
 127.190222 35.739445 414.706007 
 127.190333 35.739445 409.520579 
 127.190444 35.739445 409.488273 
 127.190556 35.739445 411.625203 
 127.189444 35.739556 484.009676 
 127.189556 35.739556 472.779757 
 127.189667 35.739556 467.903863 
 127.189778 35.739556 462.403820 
 127.190000 35.739556 432.688168 
 127.190222 35.739556 416.929508 
 127.190333 35.739556 411.120142 
 127.190444 35.739556 411.175549 
 127.190556 35.739556 412.588679 
 127.189444 35.739667 483.148508 
 127.189556 35.739667 473.963721 
 127.189667 35.739667 471.123228 
 127.189778 35.739667 466.429525 
 127.190000 35.739667 436.037726 
 127.190222 35.739667 422.177188 
 127.190333 35.739667 415.656628 
 127.190444 35.739667 414.141264 
 127.190556 35.739667 413.533140 
 127.189556 35.739667 473.963721 
 127.189667 35.739667 471.123228 
 127.189778 35.739667 466.429525 
 127.189889 35.739667 450.079693 
 127.190111 35.739667 430.962617 
 127.190333 35.739667 415.656628 
 127.190444 35.739667 414.141264 
 127.190556 35.739667 413.533140 
 127.190667 35.739667 413.541951 
 127.189556 35.739778 474.212864 
 127.189667 35.739778 472.673315 
 127.189778 35.739778 469.358288 
 127.189889 35.739778 456.681468 
 127.190111 35.739778 439.096225 
 127.190333 35.739778 426.622126 
 127.190444 35.739778 418.746135 
 127.190556 35.739778 414.803236 
 127.190667 35.739778 414.556598 
 127.189556 35.739889 474.153854 
 127.189667 35.739889 473.436725 
 127.189778 35.739889 471.720813 
 127.189889 35.739889 464.812865 
 127.190111 35.739889 454.458790 
 127.190333 35.739889 443.816933 
 127.190444 35.739889 425.522407 
 127.190556 35.739889 417.109256 
 127.190667 35.739889 416.813077 
 127.189667 35.739889 473.436725 
 127.189778 35.739889 471.720813 
 127.189889 35.739889 464.812865 
 127.190000 35.739889 456.385486 
 127.190222 35.739889 453.997434 
 127.190444 35.739889 425.522407 
 127.190556 35.739889 417.109256 
 127.190667 35.739889 416.813077 
 127.190778 35.739889 418.805625 
 127.189667 35.740000 473.956537 
 127.189778 35.740000 474.118560 
 127.189889 35.740000 474.078836 
 127.190000 35.740000 472.888011 
 127.190222 35.740000 469.172700 
 127.190444 35.740000 435.103844 
 127.190556 35.740000 421.823779 
 127.190667 35.740000 421.616232 
 127.190778 35.740000 421.800040 
 127.189667 35.740111 474.573472 
 127.189778 35.740111 477.183631 
 127.189889 35.740111 482.698770 
 127.190000 35.740111 484.799570 
 127.190222 35.740111 475.996495 
 127.190444 35.740111 447.306124 
 127.190556 35.740111 431.274215 
 127.190667 35.740111 430.487190 
 127.190778 35.740111 425.563573 
 127.189778 35.740111 477.183631 
 127.189889 35.740111 482.698770 
 127.190000 35.740111 484.799570 
 127.190111 35.740111 481.647802 
 127.190333 35.740111 468.186756 
 127.190556 35.740111 431.274215 
 127.190667 35.740111 430.487190 
 127.190778 35.740111 425.563573 
 127.190889 35.740111 420.316683 
 127.189778 35.740222 481.228742 
 127.189889 35.740222 488.691432 
 127.190000 35.740222 490.351524 
 127.190111 35.740222 486.025609 
 127.190333 35.740222 473.088484 
 127.190556 35.740222 447.021109 
 127.190667 35.740222 443.300951 
 127.190778 35.740222 430.623618 
 127.190889 35.740222 422.676736 
 127.189778 35.740333 485.748803 
 127.189889 35.740333 491.958479 
 127.190000 35.740333 492.490638 
 127.190111 35.740333 487.881440 
 127.190333 35.740333 476.141194 
 127.190556 35.740333 465.424377 
 127.190667 35.740333 457.473136 
 127.190778 35.740333 437.765807 
 127.190889 35.740333 426.656311 
 127.189889 35.740333 491.958479 
 127.190000 35.740333 492.490638 
 127.190111 35.740333 487.881440 
 127.190222 35.740333 480.161149 
 127.190444 35.740333 470.628139 
 127.190667 35.740333 457.473136 
 127.190778 35.740333 437.765807 
 127.190889 35.740333 426.656311 
 127.191000 35.740333 426.561247 
 127.189889 35.740445 493.505521 
 127.190000 35.740445 493.345403 
 127.190111 35.740445 489.066979 
 127.190222 35.740445 481.998266 
 127.190444 35.740445 478.520015 
 127.190667 35.740445 470.066117 
 127.190778 35.740445 447.477420 
 127.190889 35.740445 433.060755 
 127.191000 35.740445 433.150686 
 127.189889 35.740556 494.216963 
 127.190000 35.740556 493.844962 
 127.190111 35.740556 490.545678 
 127.190222 35.740556 485.406063 
 127.190444 35.740556 484.973333 
 127.190667 35.740556 479.636553 
 127.190778 35.740556 459.073819 
 127.190889 35.740556 441.996614 
 127.191000 35.740556 440.229637 
 127.190000 35.740556 493.844962 
 127.190111 35.740556 490.545678 
 127.190222 35.740556 485.406063 
 127.190333 35.740556 483.706997 
 127.190556 35.740556 487.157438 
 127.190778 35.740556 459.073819 
 127.190889 35.740556 441.996614 
 127.191000 35.740556 440.229637 
 127.191111 35.740556 444.081308 
 127.190000 35.740667 494.454049 
 127.190111 35.740667 493.205991 
 127.190222 35.740667 491.564515 
 127.190333 35.740667 491.070731 
 127.190556 35.740667 491.321781 
 127.190778 35.740667 470.307685 
 127.190889 35.740667 451.598886 
 127.191000 35.740667 445.618873 
 127.191111 35.740667 445.775976 
 127.190000 35.740778 495.639035 
 127.190111 35.740778 497.830162 
 127.190222 35.740778 499.825425 
 127.190333 35.740778 499.922782 
 127.190556 35.740778 494.079696 
 127.190778 35.740778 478.681749 
 127.190889 35.740778 458.971065 
 127.191000 35.740778 449.165356 
 127.191111 35.740778 447.217384 
 127.190000 35.740889 498.081598 
 127.190111 35.740889 503.905402 
 127.190222 35.740889 507.081189 
 127.190333 35.740889 507.070282 
 127.190556 35.740889 496.732477 
 127.190778 35.740889 483.809998 
 127.190889 35.740889 463.935226 
 127.191000 35.740889 452.532226 
 127.191111 35.740889 449.346158 
 127.190111 35.740889 503.905402 
 127.190222 35.740889 507.081189 
 127.190333 35.740889 507.070282 
 127.190444 35.740889 503.457468 
 127.190667 35.740889 492.695700 
 127.190889 35.740889 463.935226 
 127.191000 35.740889 452.532226 
 127.191111 35.740889 449.346158 
 127.191222 35.740889 448.572119 
 127.190111 35.741000 509.167633 
 127.190222 35.741000 511.369803 
 127.190333 35.741000 511.187070 
 127.190444 35.741000 507.806135 
 127.190667 35.741000 495.545586 
 127.190889 35.741000 468.979359 
 127.191000 35.741000 457.539495 
 127.191111 35.741000 453.120557 
 127.191222 35.741000 451.741746 
 127.190111 35.741111 512.285776 
 127.190222 35.741111 513.355242 
 127.190333 35.741111 513.189340 
 127.190444 35.741111 510.970523 
 127.190667 35.741111 500.203862 
 127.190889 35.741111 476.106346 
 127.191000 35.741111 465.295411 
 127.191111 35.741111 459.340139 
 127.191222 35.741111 456.044345 
 127.190222 35.741111 513.355242 
 127.190333 35.741111 513.189340 
 127.190444 35.741111 510.970523 
 127.190556 35.741111 504.968253 
 127.190778 35.741111 492.017642 
 127.191000 35.741111 465.295411 
 127.191111 35.741111 459.340139 
 127.191222 35.741111 456.044345 
 127.191333 35.741111 455.634087 
 127.190222 35.741222 514.185264 
 127.190333 35.741222 514.181482 
 127.190444 35.741222 513.420790 
 127.190556 35.741222 510.700068 
 127.190778 35.741222 498.074510 
 127.191000 35.741222 475.083603 
 127.191111 35.741222 467.610775 
 127.191222 35.741222 460.030013 
 127.191333 35.741222 456.704276 
 127.190222 35.741333 514.553373 
 127.190333 35.741333 514.836797 
 127.190444 35.741333 515.556774 
 127.190556 35.741333 515.617845 
 127.190778 35.741333 503.832379 
 127.191000 35.741333 484.328781 
 127.191111 35.741333 475.834878 
 127.191222 35.741333 462.730226 
 127.191333 35.741333 457.270455 
 127.190333 35.741333 514.836797 
 127.190444 35.741333 515.556774 
 127.190556 35.741333 515.617845 
 127.190667 35.741333 512.974991 
 127.190889 35.741333 491.915246 
 127.191111 35.741333 475.834878 
 127.191222 35.741333 462.730226 
 127.191333 35.741333 457.270455 
 127.191444 35.741333 456.696177 
 127.190333 35.741445 515.535234 
 127.190444 35.741445 517.489179 
 127.190556 35.741445 518.603698 
 127.190667 35.741445 516.656732 
 127.190889 35.741445 496.906930 
 127.191111 35.741445 482.197304 
 127.191222 35.741445 464.770959 
 127.191333 35.741445 457.943300 
 127.191444 35.741445 457.442267 
 127.190333 35.741556 516.497794 
 127.190444 35.741556 519.042843 
 127.190556 35.741556 520.020048 
 127.190667 35.741556 518.435707 
 127.190889 35.741556 500.000080 
 127.191111 35.741556 486.875721 
 127.191222 35.741556 467.690078 
 127.191333 35.741556 459.509372 
 127.191444 35.741556 458.961439 
 127.190444 35.741556 519.042843 
 127.190556 35.741556 520.020048 
 127.190667 35.741556 518.435707 
 127.190778 35.741556 510.583339 
 127.191000 35.741556 495.077341 
 127.191222 35.741556 467.690078 
 127.191333 35.741556 459.509372 
 127.191444 35.741556 458.961439 
 127.191556 35.741556 461.622918 
 127.190444 35.741667 520.078384 
 127.190556 35.741667 520.621070 
 127.190667 35.741667 519.279583 
 127.190778 35.741667 512.403603 
 127.191000 35.741667 497.760943 
 127.191222 35.741667 473.774974 
 127.191333 35.741667 463.536559 
 127.191444 35.741667 461.585235 
 127.191556 35.741667 462.966634 
 127.190444 35.741778 520.654451 
 127.190556 35.741778 520.862881 
 127.190667 35.741778 519.682207 
 127.190778 35.741778 513.692234 
 127.191000 35.741778 500.304737 
 127.191222 35.741778 484.797885 
 127.191333 35.741778 472.293610 
 127.191444 35.741778 465.371935 
 127.191556 35.741778 464.524356 
 127.190556 35.741778 520.862881 
 127.190667 35.741778 519.682207 
 127.190778 35.741778 513.692234 
 127.190889 35.741778 504.185586 
 127.191111 35.741778 496.964082 
 127.191333 35.741778 472.293610 
 127.191444 35.741778 465.371935 
 127.191556 35.741778 464.524356 
 127.191667 35.741778 465.314548 
 127.190556 35.741889 520.942269 
 127.190667 35.741889 519.792042 
 127.190778 35.741889 514.422539 
 127.190889 35.741889 506.342184 
 127.191111 35.741889 502.888500 
 127.191333 35.741889 485.411776 
 127.191444 35.741889 470.604420 
 127.191556 35.741889 467.359739 
 127.191667 35.741889 468.924831 
 127.190556 35.742000 520.916182 
 127.190667 35.742000 519.559943 
 127.190778 35.742000 514.382261 
 127.190889 35.742000 508.302052 
 127.191111 35.742000 507.059769 
 127.191333 35.742000 497.259453 
 127.191444 35.742000 478.174194 
 127.191556 35.742000 473.298298 
 127.191667 35.742000 476.408224 
 127.190667 35.742000 519.559943 
 127.190778 35.742000 514.382261 
 127.190889 35.742000 508.302052 
 127.191000 35.742000 506.522098 
 127.191222 35.742000 505.478328 
 127.191444 35.742000 478.174194 
 127.191556 35.742000 473.298298 
 127.191667 35.742000 476.408224 
 127.191778 35.742000 482.992270 
 127.190667 35.742111 518.821248 
 127.190778 35.742111 513.549952 
 127.190889 35.742111 509.500133 
 127.191000 35.742111 508.557933 
 127.191222 35.742111 508.680682 
 127.191444 35.742111 488.439195 
 127.191556 35.742111 484.033285 
 127.191667 35.742111 487.309959 
 127.191778 35.742111 485.629375 
 127.190667 35.742222 517.416182 
 127.190778 35.742222 512.363898 
 127.190889 35.742222 509.963089 
 127.191000 35.742222 509.455572 
 127.191222 35.742222 509.345931 
 127.191444 35.742222 499.075997 
 127.191556 35.742222 497.353470 
 127.191667 35.742222 497.498158 
 127.191778 35.742222 487.164932 
 127.190778 35.742222 512.363898 
 127.190889 35.742222 509.963089 
 127.191000 35.742222 509.455572 
 127.191111 35.742222 509.547547 
 127.191333 35.742222 507.175596 
 127.191556 35.742222 497.353470 
 127.191667 35.742222 497.498158 
 127.191778 35.742222 487.164932 
 127.191889 35.742222 486.140959 
 127.190778 35.742333 511.359310 
 127.190889 35.742333 510.052995 
 127.191000 35.742333 509.666550 
 127.191111 35.742333 509.205303 
 127.191333 35.742333 507.162571 
 127.191556 35.742333 507.155348 
 127.191667 35.742333 504.665563 
 127.191778 35.742333 489.482720 
 127.191889 35.742333 488.699568 
 127.190778 35.742444 510.713330 
 127.190889 35.742444 510.001917 
 127.191000 35.742444 509.453525 
 127.191111 35.742444 507.839311 
 127.191333 35.742444 503.830519 
 127.191556 35.742444 511.392199 
 127.191667 35.742444 508.962580 
 127.191778 35.742444 493.436193 
 127.191889 35.742444 492.318701 
 127.190889 35.742444 510.001917 
 127.191000 35.742444 509.453525 
 127.191111 35.742444 507.839311 
 127.191222 35.742444 505.428938 
 127.191444 35.742444 507.917276 
 127.191667 35.742444 508.962580 
 127.191778 35.742444 493.436193 
 127.191889 35.742444 492.318701 
 127.192000 35.742444 494.378652 
 127.190889 35.742555 509.869709 
 127.191000 35.742555 508.776825 
 127.191111 35.742555 504.751658 
 127.191222 35.742555 498.987467 
 127.191444 35.742555 505.074444 
 127.191667 35.742555 510.030098 
 127.191778 35.742555 497.171868 
 127.191889 35.742555 494.658179 
 127.192000 35.742555 494.143109 
 127.190889 35.742667 509.610134 
 127.191000 35.742667 507.311304 
 127.191111 35.742667 499.166288 
 127.191222 35.742667 489.766333 
 127.191444 35.742667 498.185404 
 127.191667 35.742667 507.131677 
 127.191778 35.742667 497.711158 
 127.191889 35.742667 495.098438 
 127.192000 35.742667 493.365186 
 127.191000 35.742667 507.311304 
 127.191111 35.742667 499.166288 
 127.191222 35.742667 489.766333 
 127.191333 35.742667 487.120353 
 127.191556 35.742667 508.257316 
 127.191778 35.742667 497.711158 
 127.191889 35.742667 495.098438 
 127.192000 35.742667 493.365186 
 127.192111 35.742667 489.933937 
 127.191000 35.742778 504.475462 
 127.191111 35.742778 491.663030 
 127.191222 35.742778 481.896017 
 127.191333 35.742778 480.177172 
 127.191556 35.742778 500.833270 
 127.191778 35.742778 495.918613 
 127.191889 35.742778 494.606890 
 127.192000 35.742778 492.196323 
 127.192111 35.742778 489.194782 
 127.191000 35.742889 499.668044 
 127.191111 35.742889 484.570887 
 127.191222 35.742889 477.590762 
 127.191333 35.742889 476.752122 
 127.191556 35.742889 491.946313 
 127.191778 35.742889 493.083341 
 127.191889 35.742889 493.520583 
 127.192000 35.742889 490.808883 
 127.192111 35.742889 488.606775 
 127.191111 35.742889 484.570887 
 127.191222 35.742889 477.590762 
 127.191333 35.742889 476.752122 
 127.191444 35.742889 482.523457 
 127.191667 35.742889 492.626788 
 127.191889 35.742889 493.520583 
 127.192000 35.742889 490.808883 
 127.192111 35.742889 488.606775 
 127.192222 35.742889 487.934944 
 127.191111 35.743000 479.715953 
 127.191222 35.743000 475.765523 
 127.191333 35.743000 475.401577 
 127.191444 35.743000 478.910557 
 127.191667 35.743000 488.041185 
 127.191889 35.743000 491.758071 
 127.192000 35.743000 489.413221 
 127.192111 35.743000 487.945437 
 127.192222 35.743000 487.203723 
 127.191111 35.743111 477.041652 
 127.191222 35.743111 475.047302 
 127.191333 35.743111 474.824067 
 127.191444 35.743111 476.962260 
 127.191667 35.743111 485.414872 
 127.191889 35.743111 489.116556 
 127.192000 35.743111 487.808460 
 127.192111 35.743111 486.596440 
 127.192222 35.743111 485.706901 
 127.191222 35.743111 475.047302 
 127.191333 35.743111 474.824067 
 127.191444 35.743111 476.962260 
 127.191556 35.743111 482.894158 
 127.191778 35.743111 486.945526 
 127.192000 35.743111 487.808460 
 127.192111 35.743111 486.596440 
 127.192222 35.743111 485.706901 
 127.192333 35.743111 485.283329 
 127.191222 35.743222 474.730448 
 127.191333 35.743222 474.265219 
 127.191444 35.743222 474.412796 
 127.191556 35.743222 478.818706 
 127.191778 35.743222 482.976953 
 127.192000 35.743222 484.742887 
 127.192111 35.743222 483.239122 
 127.192222 35.743222 483.175478 
 127.192333 35.743222 484.394793 
 127.191222 35.743333 474.497902 
 127.191333 35.743333 473.081445 
 127.191444 35.743333 469.192945 
 127.191556 35.743333 471.385159 
 127.191778 35.743333 475.019061 
 127.192000 35.743333 477.806133 
 127.192111 35.743333 476.339974 
 127.192222 35.743333 479.386003 
 127.192333 35.743333 483.048942 
 127.191333 35.743333 473.081445 
 127.191444 35.743333 469.192945 
 127.191556 35.743333 471.385159 
 127.191667 35.743333 475.819007 
 127.191889 35.743333 473.264148 
 127.192111 35.743333 476.339974 
 127.192222 35.743333 479.386003 
 127.192333 35.743333 483.048942 
 127.192444 35.743333 479.725788 
 127.191333 35.743444 470.371684 
 127.191444 35.743444 460.534641 
 127.191556 35.743444 460.336441 
 127.191667 35.743444 464.981003 
 127.191889 35.743444 457.804723 
 127.192111 35.743444 466.981856 
 127.192222 35.743444 474.012402 
 127.192333 35.743444 480.541466 
 127.192444 35.743444 475.314406 
 127.191333 35.743555 465.181410 
 127.191444 35.743555 451.041339 
 127.191556 35.743555 449.590466 
 127.191667 35.743555 452.767588 
 127.191889 35.743555 447.244955 
 127.192111 35.743555 459.359944 
 127.192222 35.743555 467.360713 
 127.192333 35.743555 476.042007 
 127.192444 35.743555 470.109997 
 127.191444 35.743555 451.041339 
 127.191556 35.743555 449.590466 
 127.191667 35.743555 452.767588 
 127.191778 35.743555 449.408246 
 127.192000 35.743555 456.679116 
 127.192222 35.743555 467.360713 
 127.192333 35.743555 476.042007 
 127.192444 35.743555 470.109997 
 127.192556 35.743555 464.522268 
 127.191444 35.743667 444.190322 
 127.191556 35.743667 442.773778 
 127.191667 35.743667 444.342758 
 127.191778 35.743667 442.847344 
 127.192000 35.743667 451.045523 
 127.192222 35.743667 461.027222 
 127.192333 35.743667 469.714322 
 127.192444 35.743667 465.889453 
 127.192556 35.743667 463.387315 
 127.191444 35.743778 440.541169 
 127.191556 35.743778 439.592511 
 127.191667 35.743778 440.378861 
 127.191778 35.743778 440.147269 
 127.192000 35.743778 447.657630 
 127.192222 35.743778 456.572296 
 127.192333 35.743778 463.675031 
 127.192444 35.743778 462.946776 
 127.192556 35.743778 461.971804 
 127.191556 35.743778 439.592511 
 127.191667 35.743778 440.378861 
 127.191778 35.743778 440.147269 
 127.191889 35.743778 440.411844 
 127.192111 35.743778 453.043906 
 127.192333 35.743778 463.675031 
 127.192444 35.743778 462.946776 
 127.192556 35.743778 461.971804 
 127.192667 35.743778 460.232271 
 127.191556 35.743889 438.327372 
 127.191667 35.743889 438.752884 
 127.191778 35.743889 438.345833 
 127.191889 35.743889 437.434447 
 127.192111 35.743889 450.872965 
 127.192333 35.743889 458.766432 
 127.192444 35.743889 459.820544 
 127.192556 35.743889 459.407428 
 127.192667 35.743889 458.048442 
 127.191556 35.744000 437.838136 
 127.191667 35.744000 437.719239 
 127.191778 35.744000 435.201609 
 127.191889 35.744000 431.528237 
 127.192111 35.744000 445.203065 
 127.192333 35.744000 452.889063 
 127.192444 35.744000 454.889921 
 127.192556 35.744000 455.158498 
 127.192667 35.744000 456.092160 
 127.191667 35.744000 437.719239 
 127.191778 35.744000 435.201609 
 127.191889 35.744000 431.528237 
 127.192000 35.744000 435.294036 
 127.192222 35.744000 447.107532 
 127.192444 35.744000 454.889921 
 127.192556 35.744000 455.158498 
 127.192667 35.744000 456.092160 
 127.192778 35.744000 457.113618 
 127.191667 35.744111 436.000687 
 127.191778 35.744111 428.922714 
 127.191889 35.744111 422.702141 
 127.192000 35.744111 424.233971 
 127.192222 35.744111 436.682903 
 127.192444 35.744111 448.358097 
 127.192556 35.744111 450.176901 
 127.192667 35.744111 454.742964 
 127.192778 35.744111 457.006777 
 127.191667 35.744222 432.218488 
 127.191778 35.744222 420.450828 
 127.191889 35.744222 415.028518 
 127.192000 35.744222 416.422389 
 127.192222 35.744222 429.079620 
 127.192444 35.744222 442.790217 
 127.192556 35.744222 446.262160 
 127.192667 35.744222 453.869741 
 127.192778 35.744222 456.980780 
 127.191778 35.744222 420.450828 
 127.191889 35.744222 415.028518 
 127.192000 35.744222 416.422389 
 127.192111 35.744222 425.868737 
 127.192333 35.744222 438.920662 
 127.192556 35.744222 446.262160 
 127.192667 35.744222 453.869741 
 127.192778 35.744222 456.980780 
 127.192889 35.744222 457.774397 
 127.191778 35.744333 413.838190 
 127.191889 35.744333 410.990608 
 127.192000 35.744333 413.379559 
 127.192111 35.744333 422.894726 
 127.192333 35.744333 435.578688 
 127.192556 35.744333 443.931320 
 127.192667 35.744333 453.248854 
 127.192778 35.744333 457.045106 
 127.192889 35.744333 458.075065 
 127.191778 35.744444 410.493448 
 127.191889 35.744444 409.438591 
 127.192000 35.744444 412.798769 
 127.192111 35.744444 421.998878 
 127.192333 35.744444 434.299955 
 127.192556 35.744444 442.613290 
 127.192667 35.744444 452.789211 
 127.192778 35.744444 457.264823 
 127.192889 35.744444 458.450270 
 127.191889 35.744444 409.438591 
 127.192000 35.744444 412.798769 
 127.192111 35.744444 421.998878 
 127.192222 35.744444 425.284240 
 127.192444 35.744444 438.404472 
 127.192667 35.744444 452.789211 
 127.192778 35.744444 457.264823 
 127.192889 35.744444 458.450270 
 127.193000 35.744444 458.969221 
 127.191889 35.744556 409.095845 
 127.192000 35.744556 413.480851 
 127.192111 35.744556 421.313049 
 127.192222 35.744556 424.812015 
 127.192444 35.744556 437.930423 
 127.192667 35.744556 452.618837 
 127.192778 35.744556 457.729242 
 127.192889 35.744556 458.828375 
 127.193000 35.744556 459.145286 
 127.191889 35.744667 409.661943 
 127.192000 35.744667 415.228041 
 127.192111 35.744667 420.398883 
 127.192222 35.744667 424.417758 
 127.192444 35.744667 437.860215 
 127.192667 35.744667 453.144158 
 127.192778 35.744667 458.443834 
 127.192889 35.744667 459.180724 
 127.193000 35.744667 459.372247 
 127.192000 35.744778 417.139095 
 127.192111 35.744778 419.831981 
 127.192222 35.744778 424.625930 
 127.192333 35.744778 435.065682 
 127.192556 35.744778 441.776942 
 127.192778 35.744778 459.279186 
 127.192889 35.744778 459.564231 
 127.193000 35.744778 459.750122 
 127.193111 35.744778 461.091585 
 127.192000 35.744889 418.228982 
 127.192111 35.744889 419.935990 
 127.192222 35.744889 425.899555 
 127.192333 35.744889 435.995910 
 127.192556 35.744889 443.059577 
 127.192778 35.744889 460.109045 
 127.192889 35.744889 460.069021 
 127.193000 35.744889 460.397991 
 127.193111 35.744889 462.723926 
 127.192000 35.745000 418.750642 
 127.192111 35.745000 420.574017 
 127.192222 35.745000 428.035381 
 127.192333 35.745000 436.957904 
 127.192556 35.745000 444.865778 
 127.192778 35.745000 460.876203 
 127.192889 35.745000 460.740862 
 127.193000 35.745000 461.379777 
 127.193111 35.745000 464.630309 
 127.192111 35.745000 420.574017 
 127.192222 35.745000 428.035381 
 127.192333 35.745000 436.957904 
 127.192444 35.745000 439.350435 
 127.192667 35.745000 458.461880 
 127.192889 35.745000 460.740862 
 127.193000 35.745000 461.379777 
 127.193111 35.745000 464.630309 
 127.193222 35.745000 468.311370 
 127.192111 35.745111 421.802840 
 127.192222 35.745111 430.714924 
 127.192333 35.745111 437.867561 
 127.192444 35.745111 440.363827 
 127.192667 35.745111 458.897676 
 127.192889 35.745111 461.492862 
 127.193000 35.745111 462.545383 
 127.193111 35.745111 466.208580 
 127.193222 35.745111 468.782398 
 127.192111 35.745222 423.909084 
 127.192222 35.745222 433.518929 
 127.192333 35.745222 438.805356 
 127.192444 35.745222 442.012146 
 127.192667 35.745222 458.773166 
 127.192889 35.745222 462.154768 
 127.193000 35.745222 463.576468 
 127.193111 35.745222 467.167337 
 127.193222 35.745222 468.772884 
 127.192222 35.745222 433.518929 
 127.192333 35.745222 438.805356 
 127.192444 35.745222 442.012146 
 127.192556 35.745222 449.104777 
 127.192778 35.745222 461.874661 
 127.193000 35.745222 463.576468 
 127.193111 35.745222 467.167337 
 127.193222 35.745222 468.772884 
 127.193333 35.745222 467.431022 
 127.192222 35.745333 435.963561 
 127.192333 35.745333 439.984678 
 127.192444 35.745333 444.421503 
 127.192556 35.745333 451.177398 
 127.192778 35.745333 462.136430 
 127.193000 35.745333 464.274690 
 127.193111 35.745333 467.581725 
 127.193222 35.745333 468.315233 
 127.193333 35.745333 465.446318 
 127.192222 35.745444 437.872102 
 127.192333 35.745444 441.691363 
 127.192444 35.745444 447.271678 
 127.192556 35.745444 452.805163 
 127.192778 35.745444 462.686297 
 127.193000 35.745444 464.725235 
 127.193111 35.745444 467.608678 
 127.193222 35.745444 467.260465 
 127.193333 35.745444 462.318238 
 127.192333 35.745444 441.691363 
 127.192444 35.745444 447.271678 
 127.192556 35.745444 452.805163 
 127.192667 35.745444 458.541104 
 127.192889 35.745444 463.208546 
 127.193111 35.745444 467.608678 
 127.193222 35.745444 467.260465 
 127.193333 35.745444 462.318238 
 127.193444 35.745444 453.921257 
 127.192333 35.745556 444.063025 
 127.192444 35.745556 449.898207 
 127.192556 35.745556 454.081747 
 127.192667 35.745556 459.570826 
 127.192889 35.745556 464.403346 
 127.193111 35.745556 467.368911 
 127.193222 35.745556 465.337504 
 127.193333 35.745556 458.230367 
 127.193444 35.745556 450.561633 
 127.192333 35.745667 446.833158 
 127.192444 35.745667 451.894016 
 127.192556 35.745667 455.456443 
 127.192667 35.745667 462.517727 
 127.192889 35.745667 467.477522 
 127.193111 35.745667 467.154087 
 127.193222 35.745667 462.401798 
 127.193333 35.745667 454.030550 
 127.193444 35.745667 448.341475 
 127.192444 35.745667 451.894016 
 127.192556 35.745667 455.456443 
 127.192667 35.745667 462.517727 
 127.192778 35.745667 468.732306 
 127.193000 35.745667 466.876442 
 127.193222 35.745667 462.401798 
 127.193333 35.745667 454.030550 
 127.193444 35.745667 448.341475 
 127.193556 35.745667 446.367475 
 127.192444 35.745778 453.384573 
 127.192556 35.745778 457.642606 
 127.192667 35.745778 468.045569 
 127.192778 35.745778 475.575118 
 127.193000 35.745778 471.543138 
 127.193222 35.745778 458.975835 
 127.193333 35.745778 450.688261 
 127.193444 35.745778 447.072753 
 127.193556 35.745778 446.063768 
 127.192444 35.745889 454.830340 
 127.192556 35.745889 461.518434 
 127.192667 35.745889 475.240677 
 127.192778 35.745889 482.337827 
 127.193000 35.745889 480.610614 
 127.193222 35.745889 456.726022 
 127.193333 35.745889 448.642577 
 127.193444 35.745889 446.424747 
 127.193556 35.745889 445.908823 
 127.192556 35.745889 461.518434 
 127.192667 35.745889 475.240677 
 127.192778 35.745889 482.337827 
 127.192889 35.745889 481.674529 
 127.193111 35.745889 472.993892 
 127.193333 35.745889 448.642577 
 127.193444 35.745889 446.424747 
 127.193556 35.745889 445.908823 
 127.193667 35.745889 445.754719 
 127.192556 35.746000 467.626137 
 127.192667 35.746000 481.760238 
 127.192778 35.746000 486.884979 
 127.192889 35.746000 488.137610 
 127.193111 35.746000 482.176432 
 127.193333 35.746000 447.827318 
 127.193444 35.746000 446.126179 
 127.193556 35.746000 445.753328 
 127.193667 35.746000 445.444249 
 127.192556 35.746111 475.029858 
 127.192667 35.746111 486.108806 
 127.192778 35.746111 489.432336 
 127.192889 35.746111 492.101251 
 127.193111 35.746111 490.327262 
 127.193333 35.746111 448.262898 
 127.193444 35.746111 446.012996 
 127.193556 35.746111 445.409175 
 127.193667 35.746111 444.676221 
 127.192667 35.746111 486.108806 
 127.192778 35.746111 489.432336 
 127.192889 35.746111 492.101251 
 127.193000 35.746111 495.281532 
 127.193222 35.746111 463.710411 
 127.193444 35.746111 446.012996 
 127.193556 35.746111 445.409175 
 127.193667 35.746111 444.676221 
 127.193778 35.746111 443.780830 
 127.192667 35.746222 488.544076 
 127.192778 35.746222 490.971223 
 127.192889 35.746222 494.508986 
 127.193000 35.746222 497.485407 
 127.193222 35.746222 473.190933 
 127.193444 35.746222 446.007939 
 127.193556 35.746222 444.571765 
 127.193667 35.746222 443.029044 
 127.193778 35.746222 440.999050 
 127.192667 35.746333 489.877716 
 127.192778 35.746333 492.196944 
 127.192889 35.746333 496.127505 
 127.193000 35.746333 498.151988 
 127.193222 35.746333 481.970896 
 127.193444 35.746333 446.184193 
 127.193556 35.746333 442.845832 
 127.193667 35.746333 440.175454 
 127.193778 35.746333 436.431959 
 127.192778 35.746333 492.196944 
 127.192889 35.746333 496.127505 
 127.193000 35.746333 498.151988 
 127.193111 35.746333 495.641542 
 127.193333 35.746333 456.879621 
 127.193556 35.746333 442.845832 
 127.193667 35.746333 440.175454 
 127.193778 35.746333 436.431959 
 127.193889 35.746333 415.650205 
 127.192778 35.746444 493.462280 
 127.192889 35.746444 497.228833 
 127.193000 35.746444 497.959228 
 127.193111 35.746444 494.807596 
 127.193333 35.746444 467.391425 
 127.193556 35.746444 440.173606 
 127.193667 35.746444 436.544339 
 127.193778 35.746444 431.618859 
 127.193889 35.746444 411.994293 
 127.192778 35.746556 494.856569 
 127.192889 35.746556 497.828150 
 127.193000 35.746556 497.046236 
 127.193111 35.746556 492.788189 
 127.193333 35.746556 476.602798 
 127.193556 35.746556 437.687944 
 127.193667 35.746556 433.461546 
 127.193778 35.746556 428.604318 
 127.193889 35.746556 411.772347 
 127.192889 35.746556 497.828150 
 127.193000 35.746556 497.046236 
 127.193111 35.746556 492.788189 
 127.193222 35.746556 486.852932 
 127.193444 35.746556 449.979094 
 127.193667 35.746556 433.461546 
 127.193778 35.746556 428.604318 
 127.193889 35.746556 411.772347 
 127.194000 35.746556 409.670479 
 127.192889 35.746667 497.857586 
 127.193000 35.746667 495.418847 
 127.193111 35.746667 490.339701 
 127.193222 35.746667 486.084627 
 127.193444 35.746667 455.307284 
 127.193667 35.746667 432.246860 
 127.193778 35.746667 427.655080 
 127.193889 35.746667 414.162521 
 127.194000 35.746667 413.405461 
 127.192889 35.746778 497.246832 
 127.193000 35.746778 493.205564 
 127.193111 35.746778 488.149155 
 127.193222 35.746778 485.424410 
 127.193444 35.746778 460.837522 
 127.193667 35.746778 433.746266 
 127.193778 35.746778 427.981140 
 127.193889 35.746778 418.188350 
 127.194000 35.746778 418.147360 
 127.193000 35.746778 493.205564 
 127.193111 35.746778 488.149155 
 127.193222 35.746778 485.424410 
 127.193333 35.746778 481.930380 
 127.193556 35.746778 441.774623 
 127.193778 35.746778 427.981140 
 127.193889 35.746778 418.188350 
 127.194000 35.746778 418.147360 
 127.194111 35.746778 422.094432 
 127.193000 35.746889 490.790644 
 127.193111 35.746889 486.625889 
 127.193222 35.746889 485.433877 
 127.193333 35.746889 483.106374 
 127.193556 35.746889 448.174296 
 127.193778 35.746889 429.597832 
 127.193889 35.746889 420.558090 
 127.194000 35.746889 420.286384 
 127.194111 35.746889 422.519829 
 127.193000 35.747000 488.638632 
 127.193111 35.747000 485.904028 
 127.193222 35.747000 486.474736 
 127.193333 35.747000 485.296892 
 127.193556 35.747000 453.856643 
 127.193778 35.747000 434.114861 
 127.193889 35.747000 422.178225 
 127.194000 35.747000 421.187305 
 127.194111 35.747000 422.874853 
 127.193111 35.747000 485.904028 
 127.193222 35.747000 486.474736 
 127.193333 35.747000 485.296892 
 127.193444 35.747000 469.261547 
 127.193667 35.747000 445.251467 
 127.193889 35.747000 422.178225 
 127.194000 35.747000 421.187305 
 127.194111 35.747000 422.874853 
 127.194222 35.747000 423.676089 
 127.193111 35.747111 486.095548 
 127.193222 35.747111 488.774149 
 127.193333 35.747111 488.318209 
 127.193444 35.747111 473.234728 
 127.193667 35.747111 451.346635 
 127.193889 35.747111 426.269527 
 127.194000 35.747111 422.433218 
 127.194111 35.747111 423.385914 
 127.194222 35.747111 424.338142 
 127.193111 35.747222 487.399288 
 127.193222 35.747222 491.951055 
 127.193333 35.747222 491.325124 
 127.193444 35.747222 477.225067 
 127.193667 35.747222 455.541893 
 127.193889 35.747222 436.007780 
 127.194000 35.747222 425.156483 
 127.194111 35.747222 424.372477 
 127.194222 35.747222 425.436871 
 127.193222 35.747222 491.951055 
 127.193333 35.747222 491.325124 
 127.193444 35.747222 477.225067 
 127.193556 35.747222 460.969625 
 127.193778 35.747222 451.832455 
 127.194000 35.747222 425.156483 
 127.194111 35.747222 424.372477 
 127.194222 35.747222 425.436871 
 127.194333 35.747222 427.159536 
 127.193222 35.747333 494.980669 
 127.193333 35.747333 493.736635 
 127.193444 35.747333 481.045823 
 127.193556 35.747333 464.425911 
 127.193778 35.747333 457.210446 
 127.194000 35.747333 431.205056 
 127.194111 35.747333 426.524735 
 127.194222 35.747333 426.919283 
 127.194333 35.747333 428.160108 
 127.193222 35.747444 497.148959 
 127.193333 35.747444 495.471842 
 127.193444 35.747444 484.588211 
 127.193556 35.747444 469.452505 
 127.193778 35.747444 460.311136 
 127.194000 35.747444 442.210387 
 127.194111 35.747444 430.931960 
 127.194222 35.747444 428.667463 
 127.194333 35.747444 429.147513 
 127.193333 35.747444 495.471842 
 127.193444 35.747444 484.588211 
 127.193556 35.747444 469.452505 
 127.193667 35.747444 463.762303 
 127.193889 35.747444 456.758740 
 127.194111 35.747444 430.931960 
 127.194222 35.747444 428.667463 
 127.194333 35.747444 429.147513 
 127.194444 35.747444 432.333544 
 127.193333 35.747556 496.675048 
 127.193444 35.747556 487.931936 
 127.193556 35.747556 477.093208 
 127.193667 35.747556 470.637239 
 127.193889 35.747556 461.530948 
 127.194111 35.747556 438.484760 
 127.194222 35.747556 430.945139 
 127.194333 35.747556 430.383989 
 127.194444 35.747556 433.447996 
 127.193333 35.747667 497.488600 
 127.193444 35.747667 491.192201 
 127.193556 35.747667 485.899674 
 127.193667 35.747667 479.171952 
 127.193889 35.747667 466.110121 
 127.194111 35.747667 448.782605 
 127.194222 35.747667 434.565347 
 127.194333 35.747667 432.109463 
 127.194444 35.747667 434.441390 
 127.193444 35.747667 491.192201 
 127.193556 35.747667 485.899674 
 127.193667 35.747667 479.171952 
 127.193778 35.747667 468.828833 
 127.194000 35.747667 466.150806 
 127.194222 35.747667 434.565347 
 127.194333 35.747667 432.109463 
 127.194444 35.747667 434.441390 
 127.194556 35.747667 435.551566 
 127.193444 35.747778 494.141110 
 127.193556 35.747778 492.340526 
 127.193667 35.747778 487.074742 
 127.193778 35.747778 475.963510 
 127.194000 35.747778 472.047073 
 127.194222 35.747778 440.655008 
 127.194333 35.747778 434.547294 
 127.194444 35.747778 435.598259 
 127.194556 35.747778 436.644193 
 127.193444 35.747889 496.106778 
 127.193556 35.747889 495.494253 
 127.193667 35.747889 492.345134 
 127.193778 35.747889 483.094116 
 127.194000 35.747889 474.812464 
 127.194222 35.747889 449.519567 
 127.194333 35.747889 438.222070 
 127.194444 35.747889 437.791430 
 127.194556 35.747889 439.249051 
 127.193556 35.747889 495.494253 
 127.193667 35.747889 492.345134 
 127.193778 35.747889 483.094116 
 127.193889 35.747889 475.701922 
 127.194111 35.747889 468.022344 
 127.194333 35.747889 438.222070 
 127.194444 35.747889 437.791430 
 127.194556 35.747889 439.249051 
 127.194667 35.747889 446.399887 
 127.193556 35.748000 496.726499 
 127.193667 35.748000 494.949577 
 127.193778 35.748000 487.339517 
 127.193889 35.748000 478.033340 
 127.194111 35.748000 472.830087 
 127.194333 35.748000 444.758710 
 127.194444 35.748000 443.031752 
 127.194556 35.748000 444.666352 
 127.194667 35.748000 450.501004 
 127.193556 35.748111 497.141167 
 127.193667 35.748111 495.712077 
 127.193778 35.748111 487.640106 
 127.193889 35.748111 478.669702 
 127.194111 35.748111 474.960212 
 127.194333 35.748111 456.365477 
 127.194444 35.748111 453.951856 
 127.194556 35.748111 453.207087 
 127.194667 35.748111 453.300760 
 127.193667 35.748111 495.712077 
 127.193778 35.748111 487.640106 
 127.193889 35.748111 478.669702 
 127.194000 35.748111 476.534529 
 127.194222 35.748111 467.779210 
 127.194444 35.748111 453.951856 
 127.194556 35.748111 453.207087 
 127.194667 35.748111 453.300760 
 127.194778 35.748111 454.016591 
 127.193667 35.748222 495.144142 
 127.193778 35.748222 485.259266 
 127.193889 35.748222 478.626590 
 127.194000 35.748222 476.788010 
 127.194222 35.748222 473.589224 
 127.194444 35.748222 468.936651 
 127.194556 35.748222 462.838644 
 127.194667 35.748222 455.403945 
 127.194778 35.748222 455.571855 
 127.193667 35.748333 493.257323 
 127.193778 35.748333 482.461792 
 127.193889 35.748333 478.475706 
 127.194000 35.748333 476.752805 
 127.194222 35.748333 476.321031 
 127.194444 35.748333 480.691961 
 127.194556 35.748333 471.175327 
 127.194667 35.748333 457.721079 
 127.194778 35.748333 458.627616 
 127.193778 35.748333 482.461792 
 127.193889 35.748333 478.475706 
 127.194000 35.748333 476.752805 
 127.194111 35.748333 474.933529 
 127.194333 35.748333 481.392141 
 127.194556 35.748333 471.175327 
 127.194667 35.748333 457.721079 
 127.194778 35.748333 458.627616 
 127.194889 35.748333 468.208991 
 127.193778 35.748444 480.574428 
 127.193889 35.748444 478.304685 
 127.194000 35.748444 476.238183 
 127.194111 35.748444 473.459045 
 127.194333 35.748444 485.098214 
 127.194556 35.748444 477.066433 
 127.194667 35.748444 461.041901 
 127.194778 35.748444 463.285028 
 127.194889 35.748444 471.407859 
 127.193778 35.748556 479.557672 
 127.193889 35.748556 478.021455 
 127.194000 35.748556 475.150647 
 127.194111 35.748556 471.797873 
 127.194333 35.748556 483.693133 
 127.194556 35.748556 479.621120 
 127.194667 35.748556 465.242254 
 127.194778 35.748556 467.767438 
 127.194889 35.748556 472.597991 
 127.193889 35.748556 478.021455 
 127.194000 35.748556 475.150647 
 127.194111 35.748556 471.797873 
 127.194222 35.748556 473.043271 
 127.194444 35.748556 486.920185 
 127.194667 35.748556 465.242254 
 127.194778 35.748556 467.767438 
 127.194889 35.748556 472.597991 
 127.195000 35.748556 470.974883 
 127.193889 35.748667 477.482335 
 127.194000 35.748667 473.641946 
 127.194111 35.748667 470.301510 
 127.194222 35.748667 469.152959 
 127.194444 35.748667 483.748084 
 127.194667 35.748667 468.010990 
 127.194778 35.748667 470.024723 
 127.194889 35.748667 472.238126 
 127.195000 35.748667 468.224049 
 127.193889 35.748778 476.495377 
 127.194000 35.748778 471.975934 
 127.194111 35.748778 468.587718 
 127.194222 35.748778 463.843909 
 127.194444 35.748778 475.388676 
 127.194667 35.748778 468.022900 
 127.194778 35.748778 469.635674 
 127.194889 35.748778 470.167725 
 127.195000 35.748778 464.988480 
 127.194000 35.748778 471.975934 
 127.194111 35.748778 468.587718 
 127.194222 35.748778 463.843909 
 127.194333 35.748778 465.629839 
 127.194556 35.748778 473.091230 
 127.194778 35.748778 469.635674 
 127.194889 35.748778 470.167725 
 127.195000 35.748778 464.988480 
 127.195111 35.748778 460.619537 
 127.194000 35.748889 470.185793 
 127.194111 35.748889 465.849799 
 127.194222 35.748889 456.512996 
 127.194333 35.748889 450.934001 
 127.194556 35.748889 467.692164 
 127.194778 35.748889 466.593149 
 127.194889 35.748889 465.457553 
 127.195000 35.748889 461.939512 
 127.195111 35.748889 457.920196 
 127.194000 35.749000 467.753260 
 127.194111 35.749000 460.986954 
 127.194222 35.749000 447.684553 
 127.194333 35.749000 439.528173 
 127.194556 35.749000 462.579367 
 127.194778 35.749000 459.850349 
 127.194889 35.749000 456.335529 
 127.195000 35.749000 458.291645 
 127.195111 35.749000 453.113510 
 127.194111 35.749000 460.986954 
 127.194222 35.749000 447.684553 
 127.194333 35.749000 439.528173 
 127.194444 35.749000 448.927923 
 127.194667 35.749000 464.387269 
 127.194889 35.749000 456.335529 
 127.195000 35.749000 458.291645 
 127.195111 35.749000 453.113510 
 127.195222 35.749000 434.666470 
 127.194111 35.749111 453.245983 
 127.194222 35.749111 439.565845 
 127.194333 35.749111 433.305647 
 127.194444 35.749111 438.909396 
 127.194667 35.749111 459.438649 
 127.194889 35.749111 440.400602 
 127.195000 35.749111 451.317073 
 127.195111 35.749111 445.044676 
 127.195222 35.749111 430.407215 
 127.194111 35.749222 444.026599 
 127.194222 35.749222 434.074182 
 127.194333 35.749222 430.100915 
 127.194444 35.749222 430.663967 
 127.194667 35.749222 447.679178 
 127.194889 35.749222 420.210801 
 127.195000 35.749222 437.156880 
 127.195111 35.749222 434.541621 
 127.195222 35.749222 427.651588 
 127.194222 35.749333 431.019019 
 127.194333 35.749333 427.560130 
 127.194444 35.749333 421.255596 
 127.194556 35.749333 421.018679 
 127.194778 35.749333 410.461092 
 127.195000 35.749333 417.594521 
 127.195111 35.749333 423.626283 
 127.195222 35.749333 424.834362 
 127.195333 35.749333 425.046251 
 127.194222 35.749444 429.149546 
 127.194333 35.749444 423.894083 
 127.194444 35.749444 408.812808 
 127.194556 35.749444 395.432111 
 127.194778 35.749444 399.251209 
 127.195000 35.749444 403.010791 
 127.195111 35.749444 412.544116 
 127.195222 35.749444 420.020623 
 127.195333 35.749444 421.830349 
 127.194222 35.749556 427.157984 
 127.194333 35.749556 417.369632 
 127.194444 35.749556 394.280275 
 127.194556 35.749556 378.096959 
 127.194778 35.749556 393.059234 
 127.195000 35.749556 395.749785 
 127.195111 35.749556 401.478980 
 127.195222 35.749556 411.753620 
 127.195333 35.749556 418.182734 
 127.194333 35.749556 417.369632 
 127.194444 35.749556 394.280275 
 127.194556 35.749556 378.096959 
 127.194667 35.749556 382.599071 
 127.194889 35.749556 395.673974 
 127.195111 35.749556 401.478980 
 127.195222 35.749556 411.753620 
 127.195333 35.749556 418.182734 
 127.195444 35.749556 418.873915 
 127.194333 35.749667 406.842177 
 127.194444 35.749667 381.436221 
 127.194556 35.749667 369.971092 
 127.194667 35.749667 374.221821 
 127.194889 35.749667 393.248559 
 127.195111 35.749667 393.015647 
 127.195222 35.749667 401.971771 
 127.195333 35.749667 415.370419 
 127.195444 35.749667 418.274124 
 127.194333 35.749778 393.492885 
 127.194444 35.749778 372.826623 
 127.194556 35.749778 366.544769 
 127.194667 35.749778 369.671858 
 127.194889 35.749778 388.805458 
 127.195111 35.749778 388.228758 
 127.195222 35.749778 394.577527 
 127.195333 35.749778 412.576217 
 127.195444 35.749778 416.803328 
 127.194444 35.749778 372.826623 
 127.194556 35.749778 366.544769 
 127.194667 35.749778 369.671858 
 127.194778 35.749778 382.573039 
 127.195000 35.749778 387.945430 
 127.195222 35.749778 394.577527 
 127.195333 35.749778 412.576217 
 127.195444 35.749778 416.803328 
 127.195556 35.749778 418.714023 
 127.194444 35.749889 368.114940 
 127.194556 35.749889 364.993012 
 127.194667 35.749889 366.401459 
 127.194778 35.749889 374.170362 
 127.195000 35.749889 382.949574 
 127.195222 35.749889 390.252643 
 127.195333 35.749889 408.099822 
 127.195444 35.749889 412.786336 
 127.195556 35.749889 418.473587 
 127.194444 35.750000 365.798984 
 127.194556 35.750000 364.089077 
 127.194667 35.750000 363.330001 
 127.194778 35.750000 364.022839 
 127.195000 35.750000 375.381436 
 127.195222 35.750000 387.553254 
 127.195333 35.750000 402.671250 
 127.195444 35.750000 407.570178 
 127.195556 35.750000 418.138387 
 127.194556 35.750000 364.089077 
 127.194667 35.750000 363.330001 
 127.194778 35.750000 364.022839 
 127.194889 35.750000 366.926960 
 127.195111 35.750000 383.003675 
 127.195333 35.750000 402.671250 
 127.195444 35.750000 407.570178 
 127.195556 35.750000 418.138387 
 127.195667 35.750000 420.218708 
 127.194556 35.750111 363.240085 
 127.194667 35.750111 359.917849 
 127.194778 35.750111 355.603132 
 127.194889 35.750111 356.021157 
 127.195111 35.750111 379.395803 
 127.195333 35.750111 398.723413 
 127.195444 35.750111 404.399619 
 127.195556 35.750111 417.455855 
 127.195667 35.750111 419.705245 
 127.194556 35.750222 362.017764 
 127.194667 35.750222 356.182227 
 127.194778 35.750222 350.875802 
 127.194889 35.750222 350.638682 
 127.195111 35.750222 375.680685 
 127.195333 35.750222 394.871032 
 127.195444 35.750222 402.023254 
 127.195556 35.750222 415.305538 
 127.195667 35.750222 418.370573 
 127.194667 35.750222 356.182227 
 127.194778 35.750222 350.875802 
 127.194889 35.750222 350.638682 
 127.195000 35.750222 359.021772 
 127.195222 35.750222 382.511749 
 127.195444 35.750222 402.023254 
 127.195556 35.750222 415.305538 
 127.195667 35.750222 418.370573 
 127.195778 35.750222 417.684204 
 127.194667 35.750333 352.737897 
 127.194778 35.750333 348.797006 
 127.194889 35.750333 348.748543 
 127.195000 35.750333 356.034199 
 127.195222 35.750333 380.357629 
 127.195444 35.750333 397.577361 
 127.195556 35.750333 409.294110 
 127.195667 35.750333 416.105091 
 127.195778 35.750333 417.023122 
 127.194667 35.750444 350.246704 
 127.194778 35.750444 347.970203 
 127.194889 35.750444 348.209104 
 127.195000 35.750444 355.383768 
 127.195222 35.750444 378.404113 
 127.195444 35.750444 391.788699 
 127.195556 35.750444 400.958833 
 127.195667 35.750444 413.703296 
 127.195778 35.750444 416.327420 
 127.194778 35.750444 347.970203 
 127.194889 35.750444 348.209104 
 127.195000 35.750444 355.383768 
 127.195111 35.750444 372.378968 
 127.195333 35.750444 383.582115 
 127.195556 35.750444 400.958833 
 127.195667 35.750444 413.703296 
 127.195778 35.750444 416.327420 
 127.195889 35.750444 414.881756 
 127.194778 35.750556 347.639256 
 127.194889 35.750556 348.054314 
 127.195000 35.750556 355.052713 
 127.195111 35.750556 369.973579 
 127.195333 35.750556 379.911514 
 127.195556 35.750556 395.754917 
 127.195667 35.750556 411.088583 
 127.195778 35.750556 415.251324 
 127.195889 35.750556 414.100279 
 127.194778 35.750667 347.492129 
 127.194889 35.750667 347.911861 
 127.195000 35.750667 353.826371 
 127.195111 35.750667 365.199561 
 127.195333 35.750667 375.959039 
 127.195556 35.750667 392.869792 
 127.195667 35.750667 407.174234 
 127.195778 35.750667 413.459006 
 127.195889 35.750667 413.356736 
 127.194889 35.750667 347.911861 
 127.195000 35.750667 353.826371 
 127.195111 35.750667 365.199561 
 127.195222 35.750667 370.232340 
 127.195444 35.750667 387.791874 
 127.195667 35.750667 407.174234 
 127.195778 35.750667 413.459006 
 127.195889 35.750667 413.356736 
 127.196000 35.750667 415.369305 
 127.194889 35.750778 347.583868 
 127.195000 35.750778 351.265853 
 127.195111 35.750778 358.250210 
 127.195222 35.750778 362.449913 
 127.195444 35.750778 385.640228 
 127.195667 35.750778 400.341886 
 127.195778 35.750778 410.150532 
 127.195889 35.750778 411.956367 
 127.196000 35.750778 415.077659 
 127.194889 35.750889 346.914813 
 127.195000 35.750889 348.036641 
 127.195111 35.750889 351.325974 
 127.195222 35.750889 354.011557 
 127.195444 35.750889 380.094540 
 127.195667 35.750889 389.573200 
 127.195778 35.750889 403.078565 
 127.195889 35.750889 407.707568 
 127.196000 35.750889 412.890117 
 127.195000 35.750889 348.036641 
 127.195111 35.750889 351.325974 
 127.195222 35.750889 354.011557 
 127.195333 35.750889 360.281274 
 127.195556 35.750889 385.475249 
 127.195778 35.750889 403.078565 
 127.195889 35.750889 407.707568 
 127.196000 35.750889 412.890117 
 127.196111 35.750889 411.839375 
 127.195000 35.751000 345.429721 
 127.195111 35.751000 346.630877 
 127.195222 35.751000 347.684004 
 127.195333 35.751000 350.327126 
 127.195556 35.751000 376.757966 
 127.195778 35.751000 390.318626 
 127.195889 35.751000 395.984622 
 127.196000 35.751000 405.847162 
 127.196111 35.751000 403.099164 
 127.195000 35.751111 343.938733 
 127.195111 35.751111 344.220368 
 127.195222 35.751111 343.961545 
 127.195333 35.751111 342.165975 
 127.195556 35.751111 366.268526 
 127.195778 35.751111 377.213469 
 127.195889 35.751111 376.796656 
 127.196000 35.751111 389.489164 
 127.196111 35.751111 389.517194 
 127.195111 35.751111 344.220368 
 127.195222 35.751111 343.961545 
 127.195333 35.751111 342.165975 
 127.195444 35.751111 349.951956 
 127.195667 35.751111 373.055647 
 127.195889 35.751111 376.796656 
 127.196000 35.751111 389.489164 
 127.196111 35.751111 389.517194 
 127.196222 35.751111 381.662946 
 127.195111 35.751222 343.100838 
 127.195222 35.751222 341.607871 
 127.195333 35.751222 336.262979 
 127.195444 35.751222 337.834450 
 127.195667 35.751222 369.961843 
 127.195889 35.751222 363.340636 
 127.196000 35.751222 371.013169 
 127.196111 35.751222 380.153551 
 127.196222 35.751222 379.270494 
 127.195111 35.751333 342.425537 
 127.195222 35.751333 339.344488 
 127.195333 35.751333 331.981877 
 127.195444 35.751333 332.023910 
 127.195667 35.751333 366.800350 
 127.195889 35.751333 358.460156 
 127.196000 35.751333 362.465126 
 127.196111 35.751333 376.233164 
 127.196222 35.751333 375.964327 
 127.195222 35.751333 339.344488 
 127.195333 35.751333 331.981877 
 127.195444 35.751333 332.023910 
 127.195556 35.751333 350.867442 
 127.195778 35.751333 366.388667 
 127.196000 35.751333 362.465126 
 127.196111 35.751333 376.233164 
 127.196222 35.751333 375.964327 
 127.196333 35.751333 364.120161 
 127.195222 35.751444 336.548526 
 127.195333 35.751444 329.017507 
 127.195444 35.751444 328.931852 
 127.195556 35.751444 343.419731 
 127.195778 35.751444 362.143420 
 127.196000 35.751444 359.004204 
 127.196111 35.751444 372.424395 
 127.196222 35.751444 370.519944 
 127.196333 35.751444 359.702927 
 127.195222 35.751556 333.347179 
 127.195333 35.751556 327.134340 
 127.195444 35.751556 326.830311 
 127.195556 35.751556 334.884038 
 127.195778 35.751556 352.569107 
 127.196000 35.751556 354.198507 
 127.196111 35.751556 363.547633 
 127.196222 35.751556 362.928655 
 127.196333 35.751556 356.156023 
 127.195333 35.751556 327.134340 
 127.195444 35.751556 326.830311 
 127.195556 35.751556 334.884038 
 127.195667 35.751556 347.947082 
 127.195889 35.751556 353.145736 
 127.196111 35.751556 363.547633 
 127.196222 35.751556 362.928655 
 127.196333 35.751556 356.156023 
 127.196444 35.751556 345.743206 
 127.195333 35.751667 325.990943 
 127.195444 35.751667 324.981344 
 127.195556 35.751667 325.093257 
 127.195667 35.751667 326.740403 
 127.195889 35.751667 345.061426 
 127.196111 35.751667 346.040324 
 127.196222 35.751667 353.874800 
 127.196333 35.751667 352.126301 
 127.196444 35.751667 338.846097 
 127.195333 35.751778 325.219799 
 127.195444 35.751778 322.751085 
 127.195556 35.751778 314.610903 
 127.195667 35.751778 306.697167 
 127.195889 35.751778 328.518702 
 127.196111 35.751778 328.529038 
 127.196222 35.751778 343.367850 
 127.196333 35.751778 346.076991 
 127.196444 35.751778 332.382695 
 127.195444 35.751778 322.751085 
 127.195556 35.751778 314.610903 
 127.195667 35.751778 306.697167 
 127.195778 35.751778 309.476358 
 127.196000 35.751778 329.209039 
 127.196222 35.751778 343.367850 
 127.196333 35.751778 346.076991 
 127.196444 35.751778 332.382695 
 127.196556 35.751778 324.153824 
 127.195444 35.751889 319.410947 
 127.195556 35.751889 305.097814 
 127.195667 35.751889 296.011469 
 127.195778 35.751889 296.189049 
 127.196000 35.751889 319.243663 
 127.196222 35.751889 332.149557 
 127.196333 35.751889 337.632135 
 127.196444 35.751889 327.751728 
 127.196556 35.751889 321.487565 
 127.195444 35.752000 314.432755 
 127.195556 35.752000 298.214469 
 127.195667 35.752000 291.946586 
 127.195778 35.752000 291.616297 
 127.196000 35.752000 314.456989 
 127.196222 35.752000 323.226622 
 127.196333 35.752000 328.645961 
 127.196444 35.752000 324.449215 
 127.196556 35.752000 317.720636 
 127.195556 35.752000 298.214469 
 127.195667 35.752000 291.946586 
 127.195778 35.752000 291.616297 
 127.195889 35.752000 300.583848 
 127.196111 35.752000 317.192000 
 127.196333 35.752000 328.645961 
 127.196444 35.752000 324.449215 
 127.196556 35.752000 317.720636 
 127.196667 35.752000 306.154357 
 127.195556 35.752111 294.078832 
 127.195667 35.752111 290.526349 
 127.195778 35.752111 290.319686 
 127.195889 35.752111 295.760129 
 127.196111 35.752111 315.862926 
 127.196333 35.752111 320.925886 
 127.196444 35.752111 320.902865 
 127.196556 35.752111 312.836909 
 127.196667 35.752111 303.656378 
 127.195556 35.752222 291.872658 
 127.195667 35.752222 290.008554 
 127.195778 35.752222 289.929964 
 127.195889 35.752222 292.912538 
 127.196111 35.752222 314.309614 
 127.196333 35.752222 315.345633 
 127.196444 35.752222 316.302575 
 127.196556 35.752222 308.193677 
 127.196667 35.752222 302.045668 
 127.195667 35.752222 290.008554 
 127.195778 35.752222 289.929964 
 127.195889 35.752222 292.912538 
 127.196000 35.752222 305.389415 
 127.196222 35.752222 314.915524 
 127.196444 35.752222 316.302575 
 127.196556 35.752222 308.193677 
 127.196667 35.752222 302.045668 
 127.196778 35.752222 297.983953 
 127.195667 35.752333 289.797842 
 127.195778 35.752333 289.775401 
 127.195889 35.752333 291.381969 
 127.196000 35.752333 300.442141 
 127.196222 35.752333 312.920313 
 127.196444 35.752333 312.139481 
 127.196556 35.752333 305.078076 
 127.196667 35.752333 300.665032 
 127.196778 35.752333 295.429830 
 127.195667 35.752445 289.700640 
 127.195778 35.752445 289.716283 
 127.195889 35.752445 290.925690 
 127.196000 35.752445 298.574493 
 127.196222 35.752445 311.804416 
 127.196444 35.752445 309.872675 
 127.196556 35.752445 303.431835 
 127.196667 35.752445 298.925437 
 127.196778 35.752445 292.507799 
 127.195778 35.752445 289.716283 
 127.195889 35.752445 290.925690 
 127.196000 35.752445 298.574493 
 127.196111 35.752445 309.985514 
 127.196333 35.752445 311.192368 
 127.196556 35.752445 303.431835 
 127.196667 35.752445 298.925437 
 127.196778 35.752445 292.507799 
 127.196889 35.752445 287.080048 
 127.195778 35.752556 289.732116 
 127.195889 35.752556 291.275649 
 127.196000 35.752556 300.064324 
 127.196111 35.752556 309.956026 
 127.196333 35.752556 310.532975 
 127.196556 35.752556 302.546863 
 127.196667 35.752556 296.617045 
 127.196778 35.752556 289.949671 
 127.196889 35.752556 285.742451 
 127.195778 35.752667 289.826233 
 127.195889 35.752667 292.331478 
 127.196000 35.752667 303.072922 
 127.196111 35.752667 310.535962 
 127.196333 35.752667 309.651564 
 127.196556 35.752667 302.098480 
 127.196667 35.752667 294.404560 
 127.196778 35.752667 288.170866 
 127.196889 35.752667 284.246534 
 127.195889 35.752667 292.331478 
 127.196000 35.752667 303.072922 
 127.196111 35.752667 310.535962 
 127.196222 35.752667 310.997022 
 127.196444 35.752667 307.464650 
 127.196667 35.752667 294.404560 
 127.196778 35.752667 288.170866 
 127.196889 35.752667 284.246534 
 127.197000 35.752667 277.098571 
 127.195889 35.752778 294.109844 
 127.196000 35.752778 305.941576 
 127.196111 35.752778 310.609251 
 127.196222 35.752778 310.180400 
 127.196444 35.752778 305.990501 
 127.196667 35.752778 293.517951 
 127.196778 35.752778 287.005964 
 127.196889 35.752778 282.202229 
 127.197000 35.752778 274.159468 
 127.195889 35.752889 296.600202 
 127.196000 35.752889 307.761236 
 127.196111 35.752889 309.595759 
 127.196222 35.752889 308.387604 
 127.196444 35.752889 304.906706 
 127.196667 35.752889 294.321394 
 127.196778 35.752889 286.008568 
 127.196889 35.752889 279.368850 
 127.197000 35.752889 271.501940 
 127.196000 35.752889 307.761236 
 127.196111 35.752889 309.595759 
 127.196222 35.752889 308.387604 
 127.196333 35.752889 306.158604 
 127.196556 35.752889 302.846834 
 127.196778 35.752889 286.008568 
 127.196889 35.752889 279.368850 
 127.197000 35.752889 271.501940 
 127.197111 35.752889 267.659969 
 127.196000 35.753000 307.995229 
 127.196111 35.753000 307.529144 
 127.196222 35.753000 306.076221 
 127.196333 35.753000 304.421143 
 127.196556 35.753000 303.300478 
 127.196778 35.753000 284.760343 
 127.196889 35.753000 275.953024 
 127.197000 35.753000 269.402197 
 127.197111 35.753000 266.545377 
 127.196000 35.753111 306.798372 
 127.196111 35.753111 305.502241 
 127.196222 35.753111 304.088007 
 127.196333 35.753111 302.406057 
 127.196556 35.753111 303.201921 
 127.196778 35.753111 283.000880 
 127.196889 35.753111 272.601846 
 127.197000 35.753111 267.711112 
 127.197111 35.753111 264.843637 
 127.196111 35.753111 305.502241 
 127.196222 35.753111 304.088007 
 127.196333 35.753111 302.406057 
 127.196444 35.753111 303.281627 
 127.196667 35.753111 297.633300 
 127.196889 35.753111 272.601846 
 127.197000 35.753111 267.711112 
 127.197111 35.753111 264.843637 
 127.197222 35.753111 260.563071 
 127.196111 35.753222 304.194526 
 127.196222 35.753222 302.132145 
 127.196333 35.753222 299.237362 
 127.196444 35.753222 301.266398 
 127.196667 35.753222 297.492147 
 127.196889 35.753222 269.858815 
 127.197000 35.753222 265.954944 
 127.197111 35.753222 262.044055 
 127.197222 35.753222 256.060675 
 127.196111 35.753333 303.207191 
 127.196222 35.753333 299.179517 
 127.196333 35.753333 295.141583 
 127.196444 35.753333 297.755065 
 127.196667 35.753333 294.023344 
 127.196889 35.753333 267.573424 
 127.197000 35.753333 263.505479 
 127.197111 35.753333 257.977588 
 127.197222 35.753333 251.382724 
 127.196111 35.753445 301.661535 
 127.196222 35.753445 294.884129 
 127.196333 35.753445 291.513472 
 127.196444 35.753445 293.386361 
 127.196667 35.753445 287.171533 
 127.196889 35.753445 265.006269 
 127.197000 35.753445 259.895201 
 127.197111 35.753445 253.319814 
 127.197222 35.753445 247.639746 
 127.196222 35.753445 294.884129 
 127.196333 35.753445 291.513472 
 127.196444 35.753445 293.386361 
 127.196556 35.753445 292.967082 
 127.196778 35.753445 274.385931 
 127.197000 35.753445 259.895201 
 127.197111 35.753445 253.319814 
 127.197222 35.753445 247.639746 
 127.197333 35.753445 242.205242 
 127.196222 35.753556 290.867557 
 127.196333 35.753556 289.118099 
 127.196444 35.753556 289.320110 
 127.196556 35.753556 286.310061 
 127.196778 35.753556 270.349614 
 127.197000 35.753556 255.490014 
 127.197111 35.753556 249.319923 
 127.197222 35.753556 245.112076 
 127.197333 35.753556 239.458013 
 127.196222 35.753667 288.518307 
 127.196333 35.753667 287.604087 
 127.196444 35.753667 285.921367 
 127.196556 35.753667 281.128702 
 127.196778 35.753667 266.938550 
 127.197000 35.753667 251.680773 
 127.197111 35.753667 246.650162 
 127.197222 35.753667 243.388305 
 127.197333 35.753667 236.941896 
 127.196333 35.753667 287.604087 
 127.196444 35.753667 285.921367 
 127.196556 35.753667 281.128702 
 127.196667 35.753667 275.769155 
 127.196889 35.753667 258.451050 
 127.197111 35.753667 246.650162 
 127.197222 35.753667 243.388305 
 127.197333 35.753667 236.941896 
 127.197444 35.753667 230.814481 
 127.196333 35.753778 286.375545 
 127.196444 35.753778 282.977082 
 127.196556 35.753778 278.002139 
 127.196667 35.753778 273.063782 
 127.196889 35.753778 256.729239 
 127.197111 35.753778 245.183228 
 127.197222 35.753778 241.952885 
 127.197333 35.753778 234.702045 
 127.197444 35.753778 229.900991 
 127.196333 35.753889 284.912918 
 127.196444 35.753889 280.377757 
 127.196556 35.753889 276.213369 
 127.196667 35.753889 271.066765 
 127.196889 35.753889 256.062387 
 127.197111 35.753889 244.438029 
 127.197222 35.753889 240.296452 
 127.197333 35.753889 232.683865 
 127.197444 35.753889 229.185976 
 127.196444 35.753889 280.377757 
 127.196556 35.753889 276.213369 
 127.196667 35.753889 271.066765 
 127.196778 35.753889 262.322380 
 127.197000 35.753889 249.732973 
 127.197222 35.753889 240.296452 
 127.197333 35.753889 232.683865 
 127.197444 35.753889 229.185976 
 127.197556 35.753889 227.930226 
 127.196444 35.754000 278.331718 
 127.196556 35.754000 275.052193 
 127.196667 35.754000 269.202985 
 127.196778 35.754000 260.592104 
 127.197000 35.754000 250.455202 
 127.197222 35.754000 237.721092 
 127.197333 35.754000 230.580222 
 127.197444 35.754000 228.320650 
 127.197556 35.754000 226.538833 
 127.196444 35.754111 276.972843 
 127.196556 35.754111 274.066808 
 127.196667 35.754111 267.199073 
 127.196778 35.754111 258.998392 
 127.197000 35.754111 250.422916 
 127.197222 35.754111 233.402055 
 127.197333 35.754111 227.907483 
 127.197444 35.754111 226.843411 
 127.197556 35.754111 224.055808 
 127.196556 35.754111 274.066808 
 127.196667 35.754111 267.199073 
 127.196778 35.754111 258.998392 
 127.196889 35.754111 255.038336 
 127.197111 35.754111 242.043481 
 127.197333 35.754111 227.907483 
 127.197444 35.754111 226.843411 
 127.197556 35.754111 224.055808 
 127.197667 35.754111 218.633284 
 127.196556 35.754222 272.961520 
 127.196667 35.754222 264.823180 
 127.196778 35.754222 257.312786 
 127.196889 35.754222 253.866236 
 127.197111 35.754222 238.599338 
 127.197333 35.754222 224.778511 
 127.197444 35.754222 224.496116 
 127.197556 35.754222 221.093209 
 127.197667 35.754222 217.529032 
 127.196556 35.754333 271.406272 
 127.196667 35.754333 261.779309 
 127.196778 35.754333 255.371275 
 127.196889 35.754333 252.001199 
 127.197111 35.754333 235.648709 
 127.197333 35.754333 222.315283 
 127.197444 35.754333 221.958771 
 127.197556 35.754333 218.859075 
 127.197667 35.754333 216.991718 
 127.196667 35.754333 261.779309 
 127.196778 35.754333 255.371275 
 127.196889 35.754333 252.001199 
 127.197000 35.754333 245.131846 
 127.197222 35.754333 225.243373 
 127.197444 35.754333 221.958771 
 127.197556 35.754333 218.859075 
 127.197667 35.754333 216.991718 
 127.197778 35.754333 216.567898 
 127.196667 35.754444 258.155325 
 127.196778 35.754444 253.461512 
 127.196889 35.754444 249.971056 
 127.197000 35.754444 242.246175 
 127.197222 35.754444 224.489198 
 127.197444 35.754444 220.082076 
 127.197556 35.754444 217.391307 
 127.197667 35.754444 216.520299 
 127.197778 35.754444 216.065326 
 127.196667 35.754555 255.001441 
 127.196778 35.754555 252.113385 
 127.196889 35.754555 248.448413 
 127.197000 35.754555 240.495578 
 127.197222 35.754555 224.607675 
 127.197444 35.754555 218.504604 
 127.197556 35.754555 215.728500 
 127.197667 35.754555 215.618825 
 127.197778 35.754555 215.058705 
 127.196778 35.754555 252.113385 
 127.196889 35.754555 248.448413 
 127.197000 35.754555 240.495578 
 127.197111 35.754555 234.147720 
 127.197333 35.754555 220.327076 
 127.197556 35.754555 215.728500 
 127.197667 35.754555 215.618825 
 127.197778 35.754555 215.058705 
 127.197889 35.754555 212.795424 
 127.196778 35.754667 251.358318 
 127.196889 35.754667 247.427865 
 127.197000 35.754667 239.357302 
 127.197111 35.754667 233.534792 
 127.197333 35.754667 219.355137 
 127.197556 35.754667 212.579283 
 127.197667 35.754667 213.549680 
 127.197778 35.754667 213.427044 
 127.197889 35.754667 211.975545 
 127.196778 35.754778 250.923938 
 127.196889 35.754778 246.567340 
 127.197000 35.754778 238.147084 
 127.197111 35.754778 231.740639 
 127.197333 35.754778 217.138641 
 127.197556 35.754778 207.431479 
 127.197667 35.754778 209.729090 
 127.197778 35.754778 211.549954 
 127.197889 35.754778 211.553143 
 127.196889 35.754778 246.567340 
 127.197000 35.754778 238.147084 
 127.197111 35.754778 231.740639 
 127.197222 35.754778 222.430018 
 127.197444 35.754778 211.655681 
 127.197667 35.754778 209.729090 
 127.197778 35.754778 211.549954 
 127.197889 35.754778 211.553143 
 127.198000 35.754778 211.900366 
 127.196889 35.754889 245.497307 
 127.197000 35.754889 236.088693 
 127.197111 35.754889 227.775275 
 127.197222 35.754889 218.284106 
 127.197444 35.754889 206.188668 
 127.197667 35.754889 205.184335 
 127.197778 35.754889 209.960640 
 127.197889 35.754889 211.383400 
 127.198000 35.754889 212.464419 
 127.196889 35.755000 243.707385 
 127.197000 35.755000 232.113726 
 127.197111 35.755000 221.633227 
 127.197222 35.755000 213.635324 
 127.197444 35.755000 202.128917 
 127.197667 35.755000 201.845231 
 127.197778 35.755000 208.725329 
 127.197889 35.755000 211.358804 
 127.198000 35.755000 213.527027 
 127.197000 35.755000 232.113726 
 127.197111 35.755000 221.633227 
 127.197222 35.755000 213.635324 
 127.197333 35.755000 209.316193 
 127.197556 35.755000 199.238264 
 127.197778 35.755000 208.725329 
 127.197889 35.755000 211.358804 
 127.198000 35.755000 213.527027 
 127.198111 35.755000 218.368549 
 127.197000 35.755111 225.535221 
 127.197111 35.755111 215.531825 
 127.197222 35.755111 210.590160 
 127.197333 35.755111 207.030178 
 127.197556 35.755111 197.817597 
 127.197778 35.755111 207.570385 
 127.197889 35.755111 211.390280 
 127.198000 35.755111 215.030621 
 127.198111 35.755111 219.726450 
 127.197000 35.755222 218.041840 
 127.197111 35.755222 211.594994 
 127.197222 35.755222 209.113988 
 127.197333 35.755222 205.811493 
 127.197556 35.755222 196.834542 
 127.197778 35.755222 206.198440 
 127.197889 35.755222 211.213458 
 127.198000 35.755222 216.360045 
 127.198111 35.755222 220.373864 
 127.197111 35.755222 211.594994 
 127.197222 35.755222 209.113988 
 127.197333 35.755222 205.811493 
 127.197444 35.755222 198.723433 
 127.197667 35.755222 198.640096 
 127.197889 35.755222 211.213458 
 127.198000 35.755222 216.360045 
 127.198111 35.755222 220.373864 
 127.198222 35.755222 221.395718 
 127.197111 35.755333 209.722291 
 127.197222 35.755333 208.353032 
 127.197333 35.755333 204.492509 
 127.197444 35.755333 196.959110 
 127.197667 35.755333 197.367808 
 127.197889 35.755333 210.207418 
 127.198000 35.755333 216.609192 
 127.198111 35.755333 220.461290 
 127.198222 35.755333 221.473491 
 127.197111 35.755444 208.916598 
 127.197222 35.755444 207.632371 
 127.197333 35.755444 202.177890 
 127.197444 35.755444 194.253949 
 127.197667 35.755444 195.826191 
 127.197889 35.755444 208.218358 
 127.198000 35.755444 215.381087 
 127.198111 35.755444 220.085142 
 127.198222 35.755444 221.558369 
 127.197222 35.755444 207.632371 
 127.197333 35.755444 202.177890 
 127.197444 35.755444 194.253949 
 127.197556 35.755444 193.230858 
 127.197778 35.755444 203.043215 
 127.198000 35.755444 215.381087 
 127.198111 35.755444 220.085142 
 127.198222 35.755444 221.558369 
 127.198333 35.755444 222.404644 
 127.197222 35.755555 206.419932 
 127.197333 35.755555 198.565000 
 127.197444 35.755555 191.317269 
 127.197556 35.755555 190.787621 
 127.197778 35.755555 202.206928 
 127.198000 35.755555 212.979951 
 127.198111 35.755555 219.227766 
 127.198222 35.755555 221.664155 
 127.198333 35.755555 222.571764 
 127.197222 35.755667 204.152753 
 127.197333 35.755667 194.412625 
 127.197444 35.755667 189.192632 
 127.197556 35.755667 189.072512 
 127.197778 35.755667 201.674233 
 127.198000 35.755667 210.176689 
 127.198111 35.755667 217.909904 
 127.198222 35.755667 221.735237 
 127.198333 35.755667 222.689143 
 127.197333 35.755667 194.412625 
 127.197444 35.755667 189.192632 
 127.197556 35.755667 189.072512 
 127.197667 35.755667 193.257152 
 127.197889 35.755667 204.887855 
 127.198111 35.755667 217.909904 
 127.198222 35.755667 221.735237 
 127.198333 35.755667 222.689143 
 127.198444 35.755667 224.062686 
 127.197333 35.755778 191.048049 
 127.197444 35.755778 188.069385 
 127.197556 35.755778 188.294104 
 127.197667 35.755778 192.752456 
 127.197889 35.755778 203.937718 
 127.198111 35.755778 216.597430 
 127.198222 35.755778 221.686448 
 127.198333 35.755778 222.836011 
 127.198444 35.755778 225.736487 
 127.197333 35.755889 189.008932 
 127.197444 35.755889 187.594100 
 127.197556 35.755889 188.168956 
 127.197667 35.755889 192.562363 
 127.197889 35.755889 203.002437 
 127.198111 35.755889 216.255867 
 127.198222 35.755889 221.488713 
 127.198333 35.755889 223.119558 
 127.198444 35.755889 228.666621 
 127.197444 35.755889 187.594100 
 127.197556 35.755889 188.168956 
 127.197667 35.755889 192.562363 
 127.197778 35.755889 199.592704 
 127.198000 35.755889 206.682470 
 127.198222 35.755889 221.488713 
 127.198333 35.755889 223.119558 
 127.198444 35.755889 228.666621 
 127.198556 35.755889 238.333702 
 127.197444 35.756000 187.468363 
 127.197556 35.756000 188.511730 
 127.197667 35.756000 192.537720 
 127.197778 35.756000 197.712796 
 127.198000 35.756000 206.567330 
 127.198222 35.756000 221.219193 
 127.198333 35.756000 223.616318 
 127.198444 35.756000 232.199786 
 127.198556 35.756000 239.772958 
 127.197444 35.756111 187.573040 
 127.197556 35.756111 189.256209 
 127.197667 35.756111 192.598334 
 127.197778 35.756111 195.851567 
 127.198000 35.756111 206.947197 
 127.198222 35.756111 220.994087 
 127.198333 35.756111 224.185661 
 127.198444 35.756111 234.836719 
 127.198556 35.756111 240.366470 
 127.197556 35.756111 189.256209 
 127.197667 35.756111 192.598334 
 127.197778 35.756111 195.851567 
 127.197889 35.756111 199.963391 
 127.198111 35.756111 217.808570 
 127.198333 35.756111 224.185661 
 127.198444 35.756111 234.836719 
 127.198556 35.756111 240.366470 
 127.198667 35.756111 241.015985 
 127.197556 35.756222 190.251510 
 127.197667 35.756222 192.688755 
 127.197778 35.756222 194.628552 
 127.197889 35.756222 198.523005 
 127.198111 35.756222 217.606582 
 127.198333 35.756222 224.552343 
 127.198444 35.756222 236.102911 
 127.198556 35.756222 240.571450 
 127.198667 35.756222 241.001913 
 127.197556 35.756333 191.202093 
 127.197667 35.756333 192.786389 
 127.197778 35.756333 194.204135 
 127.197889 35.756333 198.284642 
 127.198111 35.756333 216.105011 
 127.198333 35.756333 224.675292 
 127.198444 35.756333 236.429171 
 127.198556 35.756333 240.607147 
 127.198667 35.756333 240.988078 
 127.197667 35.756333 192.786389 
 127.197778 35.756333 194.204135 
 127.197889 35.756333 198.284642 
 127.198000 35.756333 205.488644 
 127.198222 35.756333 220.640565 
 127.198444 35.756333 236.429171 
 127.198556 35.756333 240.607147 
 127.198667 35.756333 240.988078 
 127.198778 35.756333 241.945338 
 127.197667 35.756444 192.902504 
 127.197778 35.756444 194.461300 
 127.197889 35.756444 199.098715 
 127.198000 35.756444 204.229642 
 127.198222 35.756444 220.515225 
 127.198444 35.756444 236.117969 
 127.198556 35.756444 240.544866 
 127.198667 35.756444 241.034574 
 127.198778 35.756444 242.905764 
 127.197667 35.756555 193.068530 
 127.197778 35.756555 195.275762 
 127.197889 35.756555 200.198533 
 127.198000 35.756555 203.502685 
 127.198222 35.756555 220.810555 
 127.198444 35.756555 235.029690 
 127.198556 35.756555 240.382772 
 127.198667 35.756555 241.208278 
 127.198778 35.756555 244.358732 
 127.197778 35.756555 195.275762 
 127.197889 35.756555 200.198533 
 127.198000 35.756555 203.502685 
 127.198111 35.756555 210.959219 
 127.198333 35.756555 225.304095 
 127.198556 35.756555 240.382772 
 127.198667 35.756555 241.208278 
 127.198778 35.756555 244.358732 
 127.198889 35.756555 254.755961 
 127.197778 35.756667 196.519068 
 127.197889 35.756667 201.159326 
 127.198000 35.756667 203.342938 
 127.198111 35.756667 209.468521 
 127.198333 35.756667 226.148377 
 127.198556 35.756667 240.105504 
 127.198667 35.756667 241.568001 
 127.198778 35.756667 246.358145 
 127.198889 35.756667 257.531753 
 127.197778 35.756778 197.999074 
 127.197889 35.756778 201.987560 
 127.198000 35.756778 203.729323 
 127.198111 35.756778 209.297169 
 127.198333 35.756778 226.693350 
 127.198556 35.756778 239.738957 
 127.198667 35.756778 242.198189 
 127.198778 35.756778 248.832011 
 127.198889 35.756778 259.647456 
 127.197889 35.756778 201.987560 
 127.198000 35.756778 203.729323 
 127.198111 35.756778 209.297169 
 127.198222 35.756778 222.783376 
 127.198444 35.756778 231.132584 
 127.198667 35.756778 242.198189 
 127.198778 35.756778 248.832011 
 127.198889 35.756778 259.647456 
 127.199000 35.756778 263.708821 
 127.197889 35.756889 202.871794 
 127.198000 35.756889 204.523975 
 127.198111 35.756889 209.501883 
 127.198222 35.756889 222.867467 
 127.198444 35.756889 229.703151 
 127.198667 35.756889 243.250241 
 127.198778 35.756889 251.454127 
 127.198889 35.756889 261.014361 
 127.199000 35.756889 263.991272 
 127.197889 35.757000 203.882881 
 127.198000 35.757000 205.314203 
 127.198111 35.757000 209.410178 
 127.198222 35.757000 222.169126 
 127.198444 35.757000 228.596764 
 127.198667 35.757000 244.880632 
 127.198778 35.757000 253.545455 
 127.198889 35.757000 261.580963 
 127.199000 35.757000 264.174793 
 127.198000 35.757000 205.314203 
 127.198111 35.757000 209.410178 
 127.198222 35.757000 222.169126 
 127.198333 35.757000 226.337289 
 127.198556 35.757000 239.384588 
 127.198778 35.757000 253.545455 
 127.198889 35.757000 261.580963 
 127.199000 35.757000 264.174793 
 127.199111 35.757000 265.912459 
 127.198000 35.757111 205.808481 
 127.198111 35.757111 209.144659 
 127.198222 35.757111 220.933695 
 127.198333 35.757111 225.119237 
 127.198556 35.757111 239.994190 
 127.198778 35.757111 254.155605 
 127.198889 35.757111 261.141028 
 127.199000 35.757111 264.253054 
 127.199111 35.757111 266.868769 
 127.198000 35.757222 206.067885 
 127.198111 35.757222 209.025560 
 127.198222 35.757222 219.217767 
 127.198333 35.757222 222.518179 
 127.198556 35.757222 240.588817 
 127.198778 35.757222 252.899822 
 127.198889 35.757222 259.215813 
 127.199000 35.757222 263.795859 
 127.199111 35.757222 267.169328 
 127.198111 35.757333 209.391411 
 127.198222 35.757333 217.216249 
 127.198333 35.757333 219.006536 
 127.198444 35.757333 222.188479 
 127.198667 35.757333 247.699649 
 127.198889 35.757333 255.240514 
 127.199000 35.757333 261.399428 
 127.199111 35.757333 266.128819 
 127.199222 35.757333 266.073879 
 127.198111 35.757444 210.614223 
 127.198222 35.757444 215.623087 
 127.198333 35.757444 216.348788 
 127.198444 35.757444 219.484314 
 127.198667 35.757444 246.408709 
 127.198889 35.757444 249.010326 
 127.199000 35.757444 254.887722 
 127.199111 35.757444 262.791771 
 127.199222 35.757444 262.013588 
 127.198111 35.757556 212.433771 
 127.198222 35.757556 214.815493 
 127.198333 35.757556 214.960413 
 127.198444 35.757556 216.686066 
 127.198667 35.757556 243.339839 
 127.198889 35.757556 240.786858 
 127.199000 35.757556 242.980053 
 127.199111 35.757556 255.368589 
 127.199222 35.757556 253.811811 
 127.198222 35.757556 214.815493 
 127.198333 35.757556 214.960413 
 127.198444 35.757556 216.686066 
 127.198556 35.757556 230.742257 
 127.198778 35.757556 246.444105 
 127.199000 35.757556 242.980053 
 127.199111 35.757556 255.368589 
 127.199222 35.757556 253.811811 
 127.199333 35.757556 233.186938 
 127.198222 35.757667 214.473644 
 127.198333 35.757667 214.029805 
 127.198444 35.757667 212.776306 
 127.198556 35.757667 220.975365 
 127.198778 35.757667 243.080623 
 127.199000 35.757667 228.071465 
 127.199111 35.757667 242.517936 
 127.199222 35.757667 241.570146 
 127.199333 35.757667 226.043032 
 127.198222 35.757778 214.251324 
 127.198333 35.757778 212.775917 
 127.198444 35.757778 207.060921 
 127.198556 35.757778 209.236038 
 127.198778 35.757778 237.108652 
 127.199000 35.757778 215.449175 
 127.199111 35.757778 227.004427 
 127.199222 35.757778 229.713261 
 127.199333 35.757778 222.369554 
 127.198333 35.757778 212.775917 
 127.198444 35.757778 207.060921 
 127.198556 35.757778 209.236038 
 127.198667 35.757778 226.603200 
 127.198889 35.757778 222.154405 
 127.199111 35.757778 227.004427 
 127.199222 35.757778 229.713261 
 127.199333 35.757778 222.369554 
 127.199444 35.757778 218.527754 
 127.198333 35.757889 210.538924 
 127.198444 35.757889 200.241430 
 127.198556 35.757889 199.124479 
 127.198667 35.757889 213.493205 
 127.198889 35.757889 213.790614 
 127.199111 35.757889 214.717367 
 127.199222 35.757889 222.173534 
 127.199333 35.757889 220.264558 
 127.199444 35.757889 215.192055 
 127.198333 35.758000 206.781984 
 127.198444 35.758000 194.102627 
 127.198556 35.758000 192.352586 
 127.198667 35.758000 200.953735 
 127.198889 35.758000 205.050985 
 127.199111 35.758000 206.837529 
 127.199222 35.758000 217.802596 
 127.199333 35.758000 218.009244 
 127.199444 35.758000 209.668703 
 127.198444 35.758000 194.102627 
 127.198556 35.758000 192.352586 
 127.198667 35.758000 200.953735 
 127.198778 35.758000 210.356404 
 127.199000 35.758000 202.517381 
 127.199222 35.758000 217.802596 
 127.199333 35.758000 218.009244 
 127.199444 35.758000 209.668703 
 127.199556 35.758000 197.076772 
 127.198444 35.758111 189.816319 
 127.198556 35.758111 188.276929 
 127.198667 35.758111 190.735393 
 127.198778 35.758111 191.203528 
 127.199000 35.758111 196.958624 
 127.199222 35.758111 213.052268 
 127.199333 35.758111 214.161053 
 127.199444 35.758111 202.666599 
 127.199556 35.758111 193.047837 
 127.198444 35.758222 187.214028 
 127.198556 35.758222 185.524798 
 127.198667 35.758222 182.440929 
 127.198778 35.758222 176.936169 
 127.199000 35.758222 188.546636 
 127.199222 35.758222 204.024076 
 127.199333 35.758222 207.693754 
 127.199444 35.758222 196.418300 
 127.199556 35.758222 191.204964 
 127.198556 35.758222 185.524798 
 127.198667 35.758222 182.440929 
 127.198778 35.758222 176.936169 
 127.198889 35.758222 181.433837 
 127.199111 35.758222 189.877116 
 127.199333 35.758222 207.693754 
 127.199444 35.758222 196.418300 
 127.199556 35.758222 191.204964 
 127.199667 35.758222 194.780525 
 127.198556 35.758333 182.906200 
 127.198667 35.758333 175.720205 
 127.198778 35.758333 170.021418 
 127.198889 35.758333 173.096886 
 127.199111 35.758333 181.325940 
 127.199333 35.758333 199.112035 
 127.199444 35.758333 192.365331 
 127.199556 35.758333 190.689385 
 127.199667 35.758333 195.964961 
 127.198556 35.758444 179.531738 
 127.198667 35.758444 170.927955 
 127.198778 35.758444 167.364861 
 127.198889 35.758444 169.453637 
 127.199111 35.758444 176.751044 
 127.199333 35.758444 189.873189 
 127.199444 35.758444 190.042563 
 127.199556 35.758444 190.675735 
 127.199667 35.758444 196.385735 
 127.198667 35.758444 170.927955 
 127.198778 35.758444 167.364861 
 127.198889 35.758444 169.453637 
 127.199000 35.758444 175.533382 
 127.199222 35.758444 179.642906 
 127.199444 35.758444 190.042563 
 127.199556 35.758444 190.675735 
 127.199667 35.758444 196.385735 
 127.199778 35.758444 198.853999 
 127.198667 35.758556 168.147916 
 127.198778 35.758556 166.379263 
 127.198889 35.758556 167.878717 
 127.199000 35.758556 172.904161 
 127.199222 35.758556 172.913063 
 127.199444 35.758556 188.035803 
 127.199556 35.758556 190.208000 
 127.199667 35.758556 195.324280 
 127.199778 35.758556 197.213863 
 127.198667 35.758667 166.774665 
 127.198778 35.758667 165.847406 
 127.198889 35.758667 166.114288 
 127.199000 35.758667 169.359481 
 127.199222 35.758667 168.579569 
 127.199444 35.758667 183.945076 
 127.199556 35.758667 187.608411 
 127.199667 35.758667 191.602522 
 127.199778 35.758667 193.288840 
 127.198778 35.758667 165.847406 
 127.198889 35.758667 166.114288 
 127.199000 35.758667 169.359481 
 127.199111 35.758667 170.773956 
 127.199333 35.758667 171.467025 
 127.199556 35.758667 187.608411 
 127.199667 35.758667 191.602522 
 127.199778 35.758667 193.288840 
 127.199889 35.758667 189.539411 
 127.198778 35.758778 165.051076 
 127.198889 35.758778 162.278054 
 127.199000 35.758778 162.937377 
 127.199111 35.758778 166.029771 
 127.199333 35.758778 165.237181 
 127.199556 35.758778 181.129178 
 127.199667 35.758778 184.506138 
 127.199778 35.758778 186.251418 
 127.199889 35.758778 182.734243 
 127.198778 35.758889 163.083628 
 127.198889 35.758889 155.966071 
 127.199000 35.758889 155.145824 
 127.199111 35.758889 160.449278 
 127.199333 35.758889 161.173075 
 127.199556 35.758889 172.972847 
 127.199667 35.758889 176.604862 
 127.199778 35.758889 178.661736 
 127.199889 35.758889 178.881144 
 127.198889 35.758889 155.966071 
 127.199000 35.758889 155.145824 
 127.199111 35.758889 160.449278 
 127.199222 35.758889 162.818456 
 127.199444 35.758889 163.815838 
 127.199667 35.758889 176.604862 
 127.199778 35.758889 178.661736 
 127.199889 35.758889 178.881144 
 127.200000 35.758889 178.807760 
 127.198889 35.759000 150.138641 
 127.199000 35.759000 149.604242 
 127.199111 35.759000 155.395762 
 127.199222 35.759000 160.214429 
 127.199444 35.759000 157.103674 
 127.199667 35.759000 171.265372 
 127.199778 35.759000 174.170318 
 127.199889 35.759000 177.692362 
 127.200000 35.759000 178.408230 
 127.198889 35.759111 146.996276 
 127.199000 35.759111 146.931463 
 127.199111 35.759111 151.577212 
 127.199222 35.759111 157.121248 
 127.199444 35.759111 153.530684 
 127.199667 35.759111 167.794550 
 127.199778 35.759111 172.295210 
 127.199889 35.759111 177.418739 
 127.200000 35.759111 177.711186 
 127.199000 35.759111 146.931463 
 127.199111 35.759111 151.577212 
 127.199222 35.759111 157.121248 
 127.199333 35.759111 154.940256 
 127.199556 35.759111 161.526570 
 127.199778 35.759111 172.295210 
 127.199889 35.759111 177.418739 
 127.200000 35.759111 177.711186 
 127.200111 35.759111 173.811003 
 127.199000 35.759222 145.824204 
 127.199111 35.759222 148.789479 
 127.199222 35.759222 153.039232 
 127.199333 35.759222 151.999781 
 127.199556 35.759222 155.097327 
 127.199778 35.759222 170.770601 
 127.199889 35.759222 177.037489 
 127.200000 35.759222 176.257098 
 127.200111 35.759222 171.776807 
 127.199000 35.759333 145.332110 
 127.199111 35.759333 146.164942 
 127.199222 35.759333 147.140827 
 127.199333 35.759333 148.192352 
 127.199556 35.759333 147.630214 
 127.199778 35.759333 167.428529 
 127.199889 35.759333 175.495321 
 127.200000 35.759333 173.303752 
 127.200111 35.759333 169.754082 
 127.199111 35.759333 146.164942 
 127.199222 35.759333 147.140827 
 127.199333 35.759333 148.192352 
 127.199444 35.759333 147.237802 
 127.199667 35.759333 156.087123 
 127.199889 35.759333 175.495321 
 127.200000 35.759333 173.303752 
 127.200111 35.759333 169.754082 
 127.200222 35.759333 167.991373 
 127.199111 35.759444 142.252647 
 127.199222 35.759444 139.942754 
 127.199333 35.759444 142.841197 
 127.199444 35.759444 143.078725 
 127.199667 35.759444 146.985577 
 127.199889 35.759444 170.119546 
 127.200000 35.759444 167.573032 
 127.200111 35.759444 167.106417 
 127.200222 35.759444 165.775707 
 127.199111 35.759556 136.914066 
 127.199222 35.759556 134.389904 
 127.199333 35.759556 137.293546 
 127.199444 35.759556 138.975326 
 127.199667 35.759556 139.899095 
 127.199889 35.759556 156.899654 
 127.200000 35.759556 157.907321 
 127.200111 35.759556 162.492814 
 127.200222 35.759556 161.552627 
 127.199222 35.759556 134.389904 
 127.199333 35.759556 137.293546 
 127.199444 35.759556 138.975326 
 127.199556 35.759556 137.646339 
 127.199778 35.759556 148.007512 
 127.200000 35.759556 157.907321 
 127.200111 35.759556 162.492814 
 127.200222 35.759556 161.552627 
 127.200333 35.759556 149.465287 
 127.199222 35.759667 131.558350 
 127.199333 35.759667 133.499718 
 127.199444 35.759667 135.686884 
 127.199556 35.759667 135.384899 
 127.199778 35.759667 136.849946 
 127.200000 35.759667 146.467950 
 127.200111 35.759667 154.709190 
 127.200222 35.759667 154.858499 
 127.200333 35.759667 146.149300 
 127.199222 35.759778 130.364951 
 127.199333 35.759778 131.442220 
 127.199444 35.759778 132.512262 
 127.199556 35.759778 132.810655 
 127.199778 35.759778 129.940313 
 127.200000 35.759778 138.106519 
 127.200111 35.759778 145.256432 
 127.200222 35.759778 147.566908 
 127.200333 35.759778 144.296147 
 127.199333 35.759778 131.442220 
 127.199444 35.759778 132.512262 
 127.199556 35.759778 132.810655 
 127.199667 35.759778 132.278083 
 127.199889 35.759778 133.412377 
 127.200111 35.759778 145.256432 
 127.200222 35.759778 147.566908 
 127.200333 35.759778 144.296147 
 127.200444 35.759778 143.640479 
 127.199333 35.759889 130.018789 
 127.199444 35.759889 128.315574 
 127.199556 35.759889 128.838265 
 127.199667 35.759889 128.519804 
 127.199889 35.759889 130.351623 
 127.200111 35.759889 138.149202 
 127.200222 35.759889 142.265511 
 127.200333 35.759889 143.079872 
 127.200444 35.759889 143.089728 
 127.199333 35.760000 127.997454 
 127.199444 35.760000 124.190567 
 127.199556 35.760000 124.808201 
 127.199667 35.760000 125.195101 
 127.199889 35.760000 128.700851 
 127.200111 35.760000 134.253615 
 127.200222 35.760000 138.448879 
 127.200333 35.760000 141.457890 
 127.200444 35.760000 141.657392 
 127.199444 35.760000 124.190567 
 127.199556 35.760000 124.808201 
 127.199667 35.760000 125.195101 
 127.199778 35.760000 124.134349 
 127.200000 35.760000 132.367121 
 127.200222 35.760000 138.448879 
 127.200333 35.760000 141.457890 
 127.200444 35.760000 141.657392 
 127.200556 35.760000 138.858067 
 127.199444 35.760111 121.739051 
 127.199556 35.760111 122.326878 
 127.199667 35.760111 123.182308 
 127.199778 35.760111 123.062004 
 127.200000 35.760111 131.368409 
 127.200222 35.760111 134.111096 
 127.200333 35.760111 138.334464 
 127.200444 35.760111 138.292333 
 127.200556 35.760111 133.138094 
 127.199444 35.760222 120.637085 
 127.199556 35.760222 121.182045 
 127.199667 35.760222 122.233933 
 127.199778 35.760222 122.472579 
 127.200000 35.760222 129.878082 
 127.200222 35.760222 128.771386 
 127.200333 35.760222 133.167996 
 127.200444 35.760222 132.447550 
 127.200556 35.760222 127.144295 
 127.199556 35.760222 121.182045 
 127.199667 35.760222 122.233933 
 127.199778 35.760222 122.472579 
 127.199889 35.760222 125.808635 
 127.200111 35.760222 127.987381 
 127.200333 35.760222 133.167996 
 127.200444 35.760222 132.447550 
 127.200556 35.760222 127.144295 
 127.200667 35.760222 130.601264 
 127.199556 35.760333 120.740327 
 127.199667 35.760333 121.822510 
 127.199778 35.760333 121.997802 
 127.199889 35.760333 123.505774 
 127.200111 35.760333 123.976371 
 127.200333 35.760333 127.229402 
 127.200444 35.760333 126.026496 
 127.200556 35.760333 123.645607 
 127.200667 35.760333 130.882857 
 127.199556 35.760444 120.664646 
 127.199667 35.760444 121.551713 
 127.199778 35.760444 121.278810 
 127.199889 35.760444 120.162575 
 127.200111 35.760444 120.910136 
 127.200333 35.760444 122.670968 
 127.200444 35.760444 121.661827 
 127.200556 35.760444 122.426674 
 127.200667 35.760444 131.445816 
 127.199667 35.760556 121.237939 
 127.199778 35.760556 120.537975 
 127.199889 35.760556 118.019104 
 127.200000 35.760556 117.877708 
 127.200222 35.760556 119.452682 
 127.200444 35.760556 119.454220 
 127.200556 35.760556 122.241213 
 127.200667 35.760556 131.784033 
 127.200778 35.760556 137.599222 
 127.199667 35.760667 121.048710 
 127.199778 35.760667 120.238449 
 127.199889 35.760667 117.367799 
 127.200000 35.760667 116.485634 
 127.200222 35.760667 118.321035 
 127.200444 35.760667 118.227681 
 127.200556 35.760667 122.233942 
 127.200667 35.760667 131.412471 
 127.200778 35.760667 135.953787 
 127.199667 35.760778 120.984375 
 127.199778 35.760778 120.144681 
 127.199889 35.760778 117.175871 
 127.200000 35.760778 115.442304 
 127.200222 35.760778 116.669245 
 127.200444 35.760778 116.849962 
 127.200556 35.760778 121.706416 
 127.200667 35.760778 129.598214 
 127.200778 35.760778 132.532293 
 127.199778 35.760778 120.144681 
 127.199889 35.760778 117.175871 
 127.200000 35.760778 115.442304 
 127.200111 35.760778 114.775229 
 127.200333 35.760778 115.883385 
 127.200556 35.760778 121.706416 
 127.200667 35.760778 129.598214 
 127.200778 35.760778 132.532293 
 127.200889 35.760778 130.558074 
 127.199778 35.760889 120.061870 
 127.199889 35.760889 117.108958 
 127.200000 35.760889 114.739492 
 127.200111 35.760889 113.266810 
 127.200333 35.760889 113.051415 
 127.200556 35.760889 119.854518 
 127.200667 35.760889 125.587214 
 127.200778 35.760889 126.842114 
 127.200889 35.760889 123.730703 
 127.199778 35.761000 119.928087 
 127.199889 35.761000 117.426964 
 127.200000 35.761000 115.302893 
 127.200111 35.761000 113.231597 
 127.200333 35.761000 110.841962 
 127.200556 35.761000 116.459489 
 127.200667 35.761000 119.856769 
 127.200778 35.761000 120.018824 
 127.200889 35.761000 117.166759 
 127.199889 35.761000 117.426964 
 127.200000 35.761000 115.302893 
 127.200111 35.761000 113.231597 
 127.200222 35.761000 111.883491 
 127.200444 35.761000 112.040665 
 127.200667 35.761000 119.856769 
 127.200778 35.761000 120.018824 
 127.200889 35.761000 117.166759 
 127.201000 35.761000 113.059199 
 127.199889 35.761111 118.585253 
 127.200000 35.761111 117.280231 
 127.200111 35.761111 114.549788 
 127.200222 35.761111 111.105711 
 127.200444 35.761111 110.404516 
 127.200667 35.761111 114.729714 
 127.200778 35.761111 114.622208 
 127.200889 35.761111 113.137350 
 127.201000 35.761111 111.916863 
 127.199889 35.761222 119.646180 
 127.200000 35.761222 119.045189 
 127.200111 35.761222 116.415918 
 127.200222 35.761222 111.752454 
 127.200444 35.761222 109.846563 
 127.200667 35.761222 111.739833 
 127.200778 35.761222 111.713879 
 127.200889 35.761222 111.466465 
 127.201000 35.761222 111.632373 
 127.200000 35.761222 119.045189 
 127.200111 35.761222 116.415918 
 127.200222 35.761222 111.752454 
 127.200333 35.761222 110.125042 
 127.200556 35.761222 111.012038 
 127.200778 35.761222 111.713879 
 127.200889 35.761222 111.466465 
 127.201000 35.761222 111.632373 
 127.201111 35.761222 111.737461 
 127.200000 35.761333 119.717253 
 127.200111 35.761333 117.292688 
 127.200222 35.761333 113.235664 
 127.200333 35.761333 111.006952 
 127.200556 35.761333 110.374605 
 127.200778 35.761333 110.492063 
 127.200889 35.761333 110.956415 
 127.201000 35.761333 111.580603 
 127.201111 35.761333 111.637613 
 127.200000 35.761444 119.727083 
 127.200111 35.761444 117.282692 
 127.200222 35.761444 114.786301 
 127.200333 35.761444 112.459597 
 127.200556 35.761444 110.745712 
 127.200778 35.761444 109.947697 
 127.200889 35.761444 110.776015 
 127.201000 35.761444 111.528045 
 127.201111 35.761444 111.418935 
 127.200111 35.761444 117.282692 
 127.200222 35.761444 114.786301 
 127.200333 35.761444 112.459597 
 127.200444 35.761444 110.985125 
 127.200667 35.761444 109.995843 
 127.200889 35.761444 110.776015 
 127.201000 35.761444 111.528045 
 127.201111 35.761444 111.418935 
 127.201222 35.761444 110.189561 
 127.200111 35.761556 117.164314 
 127.200222 35.761556 115.916655 
 127.200333 35.761556 114.075332 
 127.200444 35.761556 112.740718 
 127.200667 35.761556 109.864088 
 127.200889 35.761556 110.465729 
 127.201000 35.761556 111.356521 
 127.201111 35.761556 110.980592 
 127.201222 35.761556 109.119041 
 127.200111 35.761667 117.187517 
 127.200222 35.761667 116.580356 
 127.200333 35.761667 115.378068 
 127.200444 35.761667 114.605685 
 127.200667 35.761667 109.796091 
 127.200889 35.761667 109.733716 
 127.201000 35.761667 110.940936 
 127.201111 35.761667 110.220203 
 127.201222 35.761667 107.991349 
 127.200222 35.761667 116.580356 
 127.200333 35.761667 115.378068 
 127.200444 35.761667 114.605685 
 127.200556 35.761667 113.293801 
 127.200778 35.761667 108.504618 
 127.201000 35.761667 110.940936 
 127.201111 35.761667 110.220203 
 127.201222 35.761667 107.991349 
 127.201333 35.761667 106.475110 
 127.200222 35.761778 116.919118 
 127.200333 35.761778 116.168729 
 127.200444 35.761778 115.682499 
 127.200556 35.761778 114.026486 
 127.200778 35.761778 107.503652 
 127.201000 35.761778 110.139875 
 127.201111 35.761778 109.145925 
 127.201222 35.761778 107.092106 
 127.201333 35.761778 106.168866 
 127.200222 35.761889 117.038175 
 127.200333 35.761889 116.499085 
 127.200444 35.761889 116.053907 
 127.200556 35.761889 114.217047 
 127.200778 35.761889 106.855062 
 127.201000 35.761889 108.969580 
 127.201111 35.761889 107.996582 
 127.201222 35.761889 106.517731 
 127.201333 35.761889 105.978157 
 127.200333 35.761889 116.499085 
 127.200444 35.761889 116.053907 
 127.200556 35.761889 114.217047 
 127.200667 35.761889 109.485575 
 127.200889 35.761889 107.380360 
 127.201111 35.761889 107.996582 
 127.201222 35.761889 106.517731 
 127.201333 35.761889 105.978157 
 127.201444 35.761889 105.436603 
 127.200333 35.762000 116.563347 
 127.200444 35.762000 116.127086 
 127.200556 35.762000 114.149774 
 127.200667 35.762000 109.281459 
 127.200889 35.762000 106.739749 
 127.201111 35.762000 107.079989 
 127.201222 35.762000 106.181842 
 127.201333 35.762000 105.807297 
 127.201444 35.762000 105.051537 
 127.200333 35.762111 116.545343 
 127.200444 35.762111 116.102942 
 127.200556 35.762111 113.962657 
 127.200667 35.762111 109.100828 
 127.200889 35.762111 106.788082 
 127.201111 35.762111 106.496219 
 127.201222 35.762111 105.938228 
 127.201333 35.762111 105.574224 
 127.201444 35.762111 104.611342 
 127.200444 35.762111 116.102942 
 127.200556 35.762111 113.962657 
 127.200667 35.762111 109.100828 
 127.200778 35.762111 106.752729 
 127.201000 35.762111 107.311401 
 127.201222 35.762111 105.938228 
 127.201333 35.762111 105.574224 
 127.201444 35.762111 104.611342 
 127.201556 35.762111 103.781985 
 127.200444 35.762222 116.040360 
 127.200556 35.762222 113.700119 
 127.200667 35.762222 109.021307 
 127.200778 35.762222 107.257632 
 127.201000 35.762222 107.644981 
 127.201222 35.762222 105.614249 
 127.201333 35.762222 105.206325 
 127.201444 35.762222 104.200537 
 127.201556 35.762222 103.591297 
 127.200444 35.762333 115.948083 
 127.200556 35.762333 113.376161 
 127.200667 35.762333 109.179241 
 127.200778 35.762333 108.237958 
 127.201000 35.762333 108.560817 
 127.201222 35.762333 105.017678 
 127.201333 35.762333 104.669477 
 127.201444 35.762333 103.856968 
 127.201556 35.762333 103.397982 
 127.200556 35.762333 113.376161 
 127.200667 35.762333 109.179241 
 127.200778 35.762333 108.237958 
 127.200889 35.762333 108.784281 
 127.201111 35.762333 105.781710 
 127.201333 35.762333 104.669477 
 127.201444 35.762333 103.856968 
 127.201556 35.762333 103.397982 
 127.201667 35.762333 102.920431 
 127.200556 35.762444 113.016964 
 127.200667 35.762444 109.725566 
 127.200778 35.762444 109.609220 
 127.200889 35.762444 110.252236 
 127.201111 35.762444 105.338583 
 127.201333 35.762444 104.041222 
 127.201444 35.762444 103.551172 
 127.201556 35.762444 103.129449 
 127.201667 35.762444 102.470339 
 127.200556 35.762556 112.694833 
 127.200667 35.762556 110.644658 
 127.200778 35.762556 110.998805 
 127.200889 35.762556 111.436709 
 127.201111 35.762556 104.907485 
 127.201333 35.762556 103.484494 
 127.201444 35.762556 103.211138 
 127.201556 35.762556 102.708230 
 127.201667 35.762556 101.871102 
 127.200667 35.762556 110.644658 
 127.200778 35.762556 110.998805 
 127.200889 35.762556 111.436709 
 127.201000 35.762556 109.812241 
 127.201222 35.762556 103.545542 
 127.201444 35.762556 103.211138 
 127.201556 35.762556 102.708230 
 127.201667 35.762556 101.871102 
 127.201778 35.762556 100.894765 
 127.200667 35.762667 111.636130 
 127.200778 35.762667 112.030725 
 127.200889 35.762667 112.118542 
 127.201000 35.762667 109.709737 
 127.201222 35.762667 103.224857 
 127.201444 35.762667 102.769238 
 127.201556 35.762667 102.102009 
 127.201667 35.762667 101.240432 
 127.201778 35.762667 100.562024 
 127.200667 35.762778 112.388503 
 127.200778 35.762778 112.620474 
 127.200889 35.762778 112.328585 
 127.201000 35.762778 109.209092 
 127.201222 35.762778 103.101478 
 127.201444 35.762778 102.218959 
 127.201556 35.762778 101.410918 
 127.201667 35.762778 100.739237 
 127.201778 35.762778 100.374976 
 127.200778 35.762778 112.620474 
 127.200889 35.762778 112.328585 
 127.201000 35.762778 109.209092 
 127.201111 35.762778 104.300368 
 127.201333 35.762778 102.867699 
 127.201556 35.762778 101.410918 
 127.201667 35.762778 100.739237 
 127.201778 35.762778 100.374976 
 127.201889 35.762778 100.378932 
 127.200778 35.762889 112.857164 
 127.200889 35.762889 112.091549 
 127.201000 35.762889 108.309739 
 127.201111 35.762889 104.060688 
 127.201333 35.762889 102.710308 
 127.201556 35.762889 100.824593 
 127.201667 35.762889 100.420971 
 127.201778 35.762889 100.267995 
 127.201889 35.762889 100.359294 
 127.200778 35.763000 112.793769 
 127.200889 35.763000 111.289786 
 127.201000 35.763000 107.032837 
 127.201111 35.763000 103.830422 
 127.201333 35.763000 102.546810 
 127.201556 35.763000 100.426613 
 127.201667 35.763000 100.219087 
 127.201778 35.763000 100.161290 
 127.201889 35.763000 100.294783 
 127.200889 35.763000 111.289786 
 127.201000 35.763000 107.032837 
 127.201111 35.763000 103.830422 
 127.201222 35.763000 103.051745 
 127.201444 35.763000 101.106951 
 127.201667 35.763000 100.219087 
 127.201778 35.763000 100.161290 
 127.201889 35.763000 100.294783 
 127.202000 35.763000 100.408189 
 127.200889 35.763111 109.753452 
 127.201000 35.763111 105.639006 
 127.201111 35.763111 103.618734 
 127.201222 35.763111 103.025638 
 127.201444 35.763111 100.560141 
 127.201667 35.763111 100.010552 
 127.201778 35.763111 99.964249 
 127.201889 35.763111 100.143158 
 127.202000 35.763111 100.278165 
 127.200889 35.763222 107.671706 
 127.201000 35.763222 104.542808 
 127.201111 35.763222 103.445422 
 127.201222 35.763222 102.912181 
 127.201444 35.763222 99.822546 
 127.201667 35.763222 99.641726 
 127.201778 35.763222 99.569818 
 127.201889 35.763222 99.843512 
 127.202000 35.763222 100.022154 
 127.200889 35.763333 105.740756 
 127.201000 35.763333 103.889431 
 127.201111 35.763333 103.299294 
 127.201222 35.763333 102.630517 
 127.201444 35.763333 98.841781 
 127.201667 35.763333 98.947986 
 127.201778 35.763333 98.882529 
 127.201889 35.763333 99.315054 
 127.202000 35.763333 99.544355 
 127.201000 35.763333 103.889431 
 127.201111 35.763333 103.299294 
 127.201222 35.763333 102.630517 
 127.201333 35.763333 100.684032 
 127.201556 35.763333 99.022173 
 127.201778 35.763333 98.882529 
 127.201889 35.763333 99.315054 
 127.202000 35.763333 99.544355 
 127.202111 35.763333 98.906596 
 127.201000 35.763444 103.554212 
 127.201111 35.763444 103.137031 
 127.201222 35.763444 102.120552 
 127.201333 35.763444 99.572710 
 127.201556 35.763444 98.072754 
 127.201778 35.763444 97.938726 
 127.201889 35.763444 98.513061 
 127.202000 35.763444 98.749462 
 127.202111 35.763444 97.743479 
 127.201000 35.763556 103.367649 
 127.201111 35.763556 102.894381 
 127.201222 35.763556 101.345785 
 127.201333 35.763556 98.596354 
 127.201556 35.763556 97.257395 
 127.201778 35.763556 96.972958 
 127.201889 35.763556 97.529856 
 127.202000 35.763556 97.673331 
 127.202111 35.763556 96.537154 
 127.201111 35.763556 102.894381 
 127.201222 35.763556 101.345785 
 127.201333 35.763556 98.596354 
 127.201444 35.763556 97.355520 
 127.201667 35.763556 96.952818 
 127.201889 35.763556 97.529856 
 127.202000 35.763556 97.673331 
 127.202111 35.763556 96.537154 
 127.202222 35.763556 95.319040 
 127.201111 35.763667 102.487646 
 127.201222 35.763667 100.340044 
 127.201333 35.763667 97.883650 
 127.201444 35.763667 97.071470 
 127.201667 35.763667 96.308107 
 127.201889 35.763667 96.616847 
 127.202000 35.763667 96.601239 
 127.202111 35.763667 95.680410 
 127.202222 35.763667 95.052618 
 127.201111 35.763778 101.820637 
 127.201222 35.763778 99.260471 
 127.201333 35.763778 97.427398 
 127.201444 35.763778 96.940817 
 127.201667 35.763778 95.981754 
 127.201889 35.763778 95.971482 
 127.202000 35.763778 95.832587 
 127.202111 35.763778 95.231100 
 127.202222 35.763778 94.952431 
 127.201222 35.763778 99.260471 
 127.201333 35.763778 97.427398 
 127.201444 35.763778 96.940817 
 127.201556 35.763778 96.619815 
 127.201778 35.763778 95.803504 
 127.202000 35.763778 95.832587 
 127.202111 35.763778 95.231100 
 127.202222 35.763778 94.952431 
 127.202333 35.763778 94.976688 
 127.201222 35.763889 98.323644 
 127.201333 35.763889 97.160829 
 127.201444 35.763889 96.874250 
 127.201556 35.763889 96.521783 
 127.201778 35.763889 95.549113 
 127.202000 35.763889 95.401155 
 127.202111 35.763889 95.033677 
 127.202222 35.763889 94.931224 
 127.202333 35.763889 95.064244 
 127.201222 35.764000 97.665395 
 127.201333 35.764000 97.014266 
 127.201444 35.764000 96.823887 
 127.201556 35.764000 96.408690 
 127.201778 35.764000 95.352983 
 127.202000 35.764000 95.177675 
 127.202111 35.764000 94.951681 
 127.202222 35.764000 94.953302 
 127.202333 35.764000 95.195505 
 127.201333 35.764000 97.014266 
 127.201444 35.764000 96.823887 
 127.201556 35.764000 96.408690 
 127.201667 35.764000 95.625062 
 127.201889 35.764000 95.351389 
 127.202111 35.764000 94.951681 
 127.202222 35.764000 94.953302 
 127.202333 35.764000 95.195505 
 127.202444 35.764000 95.544011 
 127.201333 35.764111 96.931931 
 127.201444 35.764111 96.755781 
 127.201556 35.764111 96.204469 
 127.201667 35.764111 95.363368 
 127.201889 35.764111 95.138604 
 127.202111 35.764111 94.905747 
 127.202222 35.764111 95.005296 
 127.202333 35.764111 95.347249 
 127.202444 35.764111 95.648843 
 127.201333 35.764222 96.875164 
 127.201444 35.764222 96.634053 
 127.201556 35.764222 95.866502 
 127.201667 35.764222 95.027914 
 127.201889 35.764222 94.870201 
 127.202111 35.764222 94.833486 
 127.202222 35.764222 95.069461 
 127.202333 35.764222 95.480136 
 127.202444 35.764222 95.699899 
 127.201444 35.764222 96.634053 
 127.201556 35.764222 95.866502 
 127.201667 35.764222 95.027914 
 127.201778 35.764222 94.836598 
 127.202000 35.764222 94.829558 
 127.202222 35.764222 95.069461 
 127.202333 35.764222 95.480136 
 127.202444 35.764222 95.699899 
 127.202556 35.764222 95.647321 
 127.201444 35.764333 96.414987 
 127.201556 35.764333 95.427427 
 127.201667 35.764333 94.715535 
 127.201778 35.764333 94.568461 
 127.202000 35.764333 94.466523 
 127.202222 35.764333 95.094056 
 127.202333 35.764333 95.555543 
 127.202444 35.764333 95.691167 
 127.202556 35.764333 95.489844 
 127.201444 35.764445 96.067132 
 127.201556 35.764445 95.001846 
 127.201667 35.764445 94.499098 
 127.201778 35.764445 94.373654 
 127.202000 35.764445 93.884811 
 127.202222 35.764445 94.962023 
 127.202333 35.764445 95.524997 
 127.202444 35.764445 95.583663 
 127.202556 35.764445 95.177811 
 127.201556 35.764445 95.001846 
 127.201667 35.764445 94.499098 
 127.201778 35.764445 94.373654 
 127.201889 35.764445 94.208139 
 127.202111 35.764445 94.111323 
 127.202333 35.764445 95.524997 
 127.202444 35.764445 95.583663 
 127.202556 35.764445 95.177811 
 127.202667 35.764445 94.156164 
 127.201556 35.764556 94.685721 
 127.201667 35.764556 94.372197 
 127.201778 35.764556 94.238773 
 127.201889 35.764556 93.895403 
 127.202111 35.764556 93.308392 
 127.202333 35.764556 95.281719 
 127.202444 35.764556 95.263864 
 127.202556 35.764556 94.664571 
 127.202667 35.764556 93.804673 
 127.201556 35.764667 94.489836 
 127.201667 35.764667 94.296477 
 127.201778 35.764667 94.120184 
 127.201889 35.764667 93.581378 
 127.202111 35.764667 92.615315 
 127.202333 35.764667 94.613047 
 127.202444 35.764667 94.529405 
 127.202556 35.764667 93.985209 
 127.202667 35.764667 93.550848 
 127.201667 35.764667 94.296477 
 127.201778 35.764667 94.120184 
 127.201889 35.764667 93.581378 
 127.202000 35.764667 92.756392 
 127.202222 35.764667 93.679956 
 127.202444 35.764667 94.529405 
 127.202556 35.764667 93.985209 
 127.202667 35.764667 93.550848 
 127.202778 35.764667 93.369968 
 127.201667 35.764778 94.239232 
 127.201778 35.764778 93.979359 
 127.201889 35.764778 93.252370 
 127.202000 35.764778 92.442879 
 127.202222 35.764778 92.777668 
 127.202444 35.764778 93.333000 
 127.202556 35.764778 93.273194 
 127.202667 35.764778 93.348689 
 127.202778 35.764778 93.194392 
 127.201667 35.764889 94.176281 
 127.201778 35.764889 93.787245 
 127.201889 35.764889 92.923604 
 127.202000 35.764889 92.253346 
 127.202222 35.764889 92.147286 
 127.202444 35.764889 92.123926 
 127.202556 35.764889 92.637820 
 127.202667 35.764889 93.135925 
 127.202778 35.764889 92.868022 
 127.201778 35.764889 93.787245 
 127.201889 35.764889 92.923604 
 127.202000 35.764889 92.253346 
 127.202111 35.764889 92.078581 
 127.202333 35.764889 92.140922 
 127.202556 35.764889 92.637820 
 127.202667 35.764889 93.135925 
 127.202778 35.764889 92.868022 
 127.202889 35.764889 91.652828 
 127.201778 35.765000 93.530599 
 127.201889 35.765000 92.631018 
 127.202000 35.765000 92.142082 
 127.202111 35.765000 92.017292 
 127.202333 35.765000 91.373159 
 127.202556 35.765000 92.111574 
 127.202667 35.765000 92.854427 
 127.202778 35.765000 92.311520 
 127.202889 35.765000 90.781815 
 127.201778 35.765111 93.219000 
 127.201889 35.765111 92.401251 
 127.202000 35.765111 92.081760 
 127.202111 35.765111 92.012036 
 127.202333 35.765111 91.094789 
 127.202556 35.765111 91.692813 
 127.202667 35.765111 92.460765 
 127.202778 35.765111 91.539924 
 127.202889 35.765111 90.087106 
 127.201889 35.765111 92.401251 
 127.202000 35.765111 92.081760 
 127.202111 35.765111 92.012036 
 127.202222 35.765111 91.754031 
 127.202444 35.765111 91.002389 
 127.202667 35.765111 92.460765 
 127.202778 35.765111 91.539924 
 127.202889 35.765111 90.087106 
 127.203000 35.765111 89.453310 
 127.201889 35.765222 92.242596 
 127.202000 35.765222 92.061838 
 127.202111 35.765222 92.064810 
 127.202222 35.765222 91.855893 
 127.202444 35.765222 90.909854 
 127.202667 35.765222 91.973098 
 127.202778 35.765222 90.746008 
 127.202889 35.765222 89.661330 
 127.203000 35.765222 89.331366 
 127.201889 35.765333 92.148226 
 127.202000 35.765333 92.087856 
 127.202111 35.765333 92.208263 
 127.202222 35.765333 92.151961 
 127.202444 35.765333 91.046087 
 127.202667 35.765333 91.546805 
 127.202778 35.765333 90.162658 
 127.202889 35.765333 89.443425 
 127.203000 35.765333 89.287089 
 127.202000 35.765445 92.184167 
 127.202111 35.765445 92.470814 
 127.202222 35.765445 92.585435 
 127.202333 35.765445 92.004590 
 127.202556 35.765445 91.730962 
 127.202778 35.765445 89.910978 
 127.202889 35.765445 89.356375 
 127.203000 35.765445 89.296642 
 127.203111 35.765445 89.685795 
 127.202000 35.765556 92.381875 
 127.202111 35.765556 92.804603 
 127.202222 35.765556 92.988705 
 127.202333 35.765556 92.664996 
 127.202556 35.765556 92.656023 
 127.202778 35.765556 90.053128 
 127.202889 35.765556 89.360341 
 127.203000 35.765556 89.360149 
 127.203111 35.765556 90.104469 
 127.202000 35.765667 92.672542 
 127.202111 35.765667 93.094213 
 127.202222 35.765667 93.250526 
 127.202333 35.765667 93.178823 
 127.202556 35.765667 93.681568 
 127.202778 35.765667 90.700533 
 127.202889 35.765667 89.460354 
 127.203000 35.765667 89.494777 
 127.203111 35.765667 90.725091 
 127.202111 35.765667 93.094213 
 127.202222 35.765667 93.250526 
 127.202333 35.765667 93.178823 
 127.202444 35.765667 93.221176 
 127.202667 35.765667 93.356848 
 127.202889 35.765667 89.460354 
 127.203000 35.765667 89.494777 
 127.203111 35.765667 90.725091 
 127.203222 35.765667 94.930833 
 127.202111 35.765778 93.276850 
 127.202222 35.765778 93.387410 
 127.202333 35.765778 93.480288 
 127.202444 35.765778 93.837807 
 127.202667 35.765778 94.261978 
 127.202889 35.765778 89.734369 
 127.203000 35.765778 89.758466 
 127.203111 35.765778 91.611741 
 127.203222 35.765778 96.159863 
 127.202111 35.765889 93.372863 
 127.202222 35.765889 93.456719 
 127.202333 35.765889 93.651532 
 127.202444 35.765889 94.190660 
 127.202667 35.765889 95.004949 
 127.202889 35.765889 90.498588 
 127.203000 35.765889 90.344130 
 127.203111 35.765889 92.850467 
 127.203222 35.765889 97.223931 
 127.202222 35.765889 93.456719 
 127.202333 35.765889 93.651532 
 127.202444 35.765889 94.190660 
 127.202556 35.765889 94.727269 
 127.202778 35.765889 93.677285 
 127.203000 35.765889 90.344130 
 127.203111 35.765889 92.850467 
 127.203222 35.765889 97.223931 
 127.203333 35.765889 99.064090 
 127.202222 35.766000 93.498206 
 127.202333 35.766000 93.777093 
 127.202444 35.766000 94.473468 
 127.202556 35.766000 95.252887 
 127.202778 35.766000 96.231437 
 127.203000 35.766000 91.814209 
 127.203111 35.766000 94.522507 
 127.203222 35.766000 98.141988 
 127.203333 35.766000 99.567946 
 127.202222 35.766111 93.533712 
 127.202333 35.766111 93.918885 
 127.202444 35.766111 94.905295 
 127.202556 35.766111 96.353874 
 127.202778 35.766111 100.145547 
 127.203000 35.766111 95.320842 
 127.203111 35.766111 96.736752 
 127.203222 35.766111 99.056324 
 127.203333 35.766111 100.372982 
 127.202333 35.766111 93.918885 
 127.202444 35.766111 94.905295 
 127.202556 35.766111 96.353874 
 127.202667 35.766111 98.333196 
 127.202889 35.766111 97.734510 
 127.203111 35.766111 96.736752 
 127.203222 35.766111 99.056324 
 127.203333 35.766111 100.372982 
 127.203444 35.766111 102.066809 
 127.202333 35.766222 94.147470 
 127.202444 35.766222 95.790604 
 127.202556 35.766222 98.600960 
 127.202667 35.766222 102.155772 
 127.202889 35.766222 103.749831 
 127.203111 35.766222 99.541418 
 127.203222 35.766222 100.203347 
 127.203333 35.766222 101.613323 
 127.203444 35.766222 103.311340 
 127.202333 35.766333 94.595343 
 127.202444 35.766333 97.570694 
 127.202556 35.766333 102.333633 
 127.202667 35.766333 107.005176 
 127.202889 35.766333 107.162723 
 127.203111 35.766333 102.534196 
 127.203222 35.766333 101.756634 
 127.203333 35.766333 103.111811 
 127.203444 35.766333 104.111457 
 127.202444 35.766333 97.570694 
 127.202556 35.766333 102.333633 
 127.202667 35.766333 107.005176 
 127.202778 35.766333 109.311561 
 127.203000 35.766333 105.004127 
 127.203222 35.766333 101.756634 
 127.203333 35.766333 103.111811 
 127.203444 35.766333 104.111457 
 127.203556 35.766333 101.924046 
 127.202444 35.766445 100.635909 
 127.202556 35.766445 106.974696 
 127.202667 35.766445 111.357390 
 127.202778 35.766445 112.031546 
 127.203000 35.766445 106.596885 
 127.203222 35.766445 103.481807 
 127.203333 35.766445 104.348701 
 127.203444 35.766445 104.276921 
 127.203556 35.766445 101.099548 
 127.202444 35.766556 104.763006 
 127.202556 35.766556 111.172514 
 127.202667 35.766556 114.259132 
 127.202778 35.766556 113.301900 
 127.203000 35.766556 106.786118 
 127.203222 35.766556 104.765999 
 127.203333 35.766556 104.952527 
 127.203444 35.766556 103.860754 
 127.203556 35.766556 100.164178 
 127.202556 35.766556 111.172514 
 127.202667 35.766556 114.259132 
 127.202778 35.766556 113.301900 
 127.202889 35.766556 108.345597 
 127.203111 35.766556 105.887842 
 127.203333 35.766556 104.952527 
 127.203444 35.766556 103.860754 
 127.203556 35.766556 100.164178 
 127.203667 35.766556 98.182302 
 127.202556 35.766667 114.116149 
 127.202667 35.766667 115.811994 
 127.202778 35.766667 113.411876 
 127.202889 35.766667 107.597000 
 127.203111 35.766667 105.917288 
 127.203333 35.766667 104.883423 
 127.203444 35.766667 102.843715 
 127.203556 35.766667 99.052702 
 127.203667 35.766667 97.693889 
 127.202556 35.766778 115.847591 
 127.202667 35.766778 116.362406 
 127.202778 35.766778 112.297154 
 127.202889 35.766778 105.910103 
 127.203111 35.766778 104.962580 
 127.203333 35.766778 104.023977 
 127.203444 35.766778 100.977218 
 127.203556 35.766778 97.575674 
 127.203667 35.766778 96.917138 
 127.202667 35.766778 116.362406 
 127.202778 35.766778 112.297154 
 127.202889 35.766778 105.910103 
 127.203000 35.766778 104.786382 
 127.203222 35.766778 104.949176 
 127.203444 35.766778 100.977218 
 127.203556 35.766778 97.575674 
 127.203667 35.766778 96.917138 
 127.203778 35.766778 96.375752 
 127.202667 35.766889 116.002910 
 127.202778 35.766889 109.674889 
 127.202889 35.766889 103.383383 
 127.203000 35.766889 102.592069 
 127.203222 35.766889 103.356832 
 127.203444 35.766889 97.860669 
 127.203556 35.766889 95.449946 
 127.203667 35.766889 95.568417 
 127.203778 35.766889 94.541137 
 127.202667 35.767000 114.424809 
 127.202778 35.767000 105.837325 
 127.202889 35.767000 100.835737 
 127.203000 35.767000 100.178688 
 127.203222 35.767000 99.468851 
 127.203444 35.767000 93.561986 
 127.203556 35.767000 92.557572 
 127.203667 35.767000 93.359650 
 127.203778 35.767000 91.685090 
 127.202778 35.767000 105.837325 
 127.202889 35.767000 100.835737 
 127.203000 35.767000 100.178688 
 127.203111 35.767000 99.600000 
 127.203333 35.767000 97.630508 
 127.203556 35.767000 92.557572 
 127.203667 35.767000 93.359650 
 127.203778 35.767000 91.685090 
 127.203889 35.767000 87.243439 
 127.202778 35.767111 102.146276 
 127.202889 35.767111 99.037718 
 127.203000 35.767111 98.137036 
 127.203111 35.767111 95.836373 
 127.203333 35.767111 91.994259 
 127.203556 35.767111 89.368122 
 127.203667 35.767111 90.423952 
 127.203778 35.767111 88.621335 
 127.203889 35.767111 85.837686 
 127.202778 35.767222 99.699150 
 127.202889 35.767222 97.949563 
 127.203000 35.767222 96.337575 
 127.203111 35.767222 92.155275 
 127.203333 35.767222 87.436470 
 127.203556 35.767222 86.773548 
 127.203667 35.767222 87.610803 
 127.203778 35.767222 86.459776 
 127.203889 35.767222 85.222906 
 127.202889 35.767222 97.949563 
 127.203000 35.767222 96.337575 
 127.203111 35.767222 92.155275 
 127.203222 35.767222 88.260688 
 127.203444 35.767222 86.377572 
 127.203667 35.767222 87.610803 
 127.203778 35.767222 86.459776 
 127.203889 35.767222 85.222906 
 127.204000 35.767222 84.866175 
 127.202889 35.767333 97.136065 
 127.203000 35.767333 94.316686 
 127.203111 35.767333 89.024847 
 127.203222 35.767333 85.643875 
 127.203444 35.767333 84.918518 
 127.203667 35.767333 85.728304 
 127.203778 35.767333 85.354410 
 127.203889 35.767333 84.955986 
 127.204000 35.767333 84.672696 
 127.202889 35.767444 96.173350 
 127.203000 35.767444 91.874567 
 127.203111 35.767444 86.748039 
 127.203222 35.767444 84.523129 
 127.203444 35.767444 84.294275 
 127.203667 35.767444 84.736708 
 127.203778 35.767444 84.823139 
 127.203889 35.767444 84.772426 
 127.204000 35.767444 84.316829 
 127.202889 35.767555 94.761235 
 127.203000 35.767555 89.333472 
 127.203111 35.767555 85.323559 
 127.203222 35.767555 84.009369 
 127.203444 35.767555 83.989153 
 127.203667 35.767555 84.179385 
 127.203778 35.767555 84.425286 
 127.203889 35.767555 84.502840 
 127.204000 35.767555 83.710871 
 127.203000 35.767555 89.333472 
 127.203111 35.767555 85.323559 
 127.203222 35.767555 84.009369 
 127.203333 35.767555 83.789380 
 127.203556 35.767555 84.099500 
 127.203778 35.767555 84.425286 
 127.203889 35.767555 84.502840 
 127.204000 35.767555 83.710871 
 127.204111 35.767555 82.136074 
 127.203000 35.767667 87.194641 
 127.203111 35.767667 84.507619 
 127.203222 35.767667 83.717251 
 127.203333 35.767667 83.497409 
 127.203556 35.767667 83.786894 
 127.203778 35.767667 83.860846 
 127.203889 35.767667 83.996332 
 127.204000 35.767667 82.926152 
 127.204111 35.767667 81.675983 
 127.203000 35.767778 85.707843 
 127.203111 35.767778 84.051477 
 127.203222 35.767778 83.502451 
 127.203333 35.767778 83.247325 
 127.203556 35.767778 83.244151 
 127.203778 35.767778 83.066184 
 127.203889 35.767778 83.219341 
 127.204000 35.767778 82.207623 
 127.204111 35.767778 81.420911 
 127.203111 35.767778 84.051477 
 127.203222 35.767778 83.502451 
 127.203333 35.767778 83.247325 
 127.203444 35.767778 83.263487 
 127.203667 35.767778 82.953893 
 127.203889 35.767778 83.219341 
 127.204000 35.767778 82.207623 
 127.204111 35.767778 81.420911 
 127.204222 35.767778 81.250457 
 127.203111 35.767889 83.778105 
 127.203222 35.767889 83.321224 
 127.203333 35.767889 83.027068 
 127.203444 35.767889 82.639071 
 127.203667 35.767889 82.251236 
 127.203889 35.767889 82.426611 
 127.204000 35.767889 81.705953 
 127.204111 35.767889 81.251772 
 127.204222 35.767889 81.164637 
 127.203111 35.768000 83.587514 
 127.203222 35.768000 83.167524 
 127.203333 35.768000 82.774685 
 127.203444 35.768000 81.809249 
 127.203667 35.768000 81.738244 
 127.203889 35.768000 81.912996 
 127.204000 35.768000 81.376165 
 127.204111 35.768000 81.066793 
 127.204222 35.768000 81.018914 
 127.203222 35.768000 83.167524 
 127.203333 35.768000 82.774685 
 127.203444 35.768000 81.809249 
 127.203556 35.768000 81.172372 
 127.203778 35.768000 81.916693 
 127.204000 35.768000 81.376165 
 127.204111 35.768000 81.066793 
 127.204222 35.768000 81.018914 
 127.204333 35.768000 81.310740 
 127.203222 35.768111 83.024078 
 127.203333 35.768111 82.387814 
 127.203444 35.768111 80.856830 
 127.203556 35.768111 80.298488 
 127.203778 35.768111 81.737083 
 127.204000 35.768111 81.106166 
 127.204111 35.768111 80.806394 
 127.204222 35.768111 80.806565 
 127.204333 35.768111 81.341110 
 127.203222 35.768222 82.845080 
 127.203333 35.768222 81.776686 
 127.203444 35.768222 80.001878 
 127.203556 35.768222 79.759012 
 127.203778 35.768222 81.657911 
 127.204000 35.768222 80.839432 
 127.204111 35.768222 80.509528 
 127.204222 35.768222 80.604334 
 127.204333 35.768222 81.376286 
 127.203333 35.768222 81.776686 
 127.203444 35.768222 80.001878 
 127.203556 35.768222 79.759012 
 127.203667 35.768222 81.150691 
 127.203889 35.768222 81.541427 
 127.204111 35.768222 80.509528 
 127.204222 35.768222 80.604334 
 127.204333 35.768222 81.376286 
 127.204444 35.768222 81.820393 
 127.203333 35.768333 80.968772 
 127.203444 35.768333 79.411511 
 127.203556 35.768333 79.470817 
 127.203667 35.768333 80.935447 
 127.203889 35.768333 81.430248 
 127.204111 35.768333 80.281892 
 127.204222 35.768333 80.491811 
 127.204333 35.768333 81.410263 
 127.204444 35.768333 81.807902 
 127.203333 35.768444 80.147972 
 127.203444 35.768444 79.081857 
 127.203556 35.768444 79.369139 
 127.203667 35.768444 80.681192 
 127.203889 35.768444 81.234145 
 127.204111 35.768444 80.153597 
 127.204222 35.768444 80.461139 
 127.204333 35.768444 81.431033 
 127.204444 35.768444 81.766742 
 127.203444 35.768444 79.081857 
 127.203556 35.768444 79.369139 
 127.203667 35.768444 80.681192 
 127.203778 35.768444 81.403049 
 127.204000 35.768444 80.405665 
 127.204222 35.768444 80.461139 
 127.204333 35.768444 81.431033 
 127.204444 35.768444 81.766742 
 127.204556 35.768444 81.758339 
 127.203444 35.768555 78.954385 
 127.203556 35.768555 79.444033 
 127.203667 35.768555 80.345398 
 127.203778 35.768555 80.952558 
 127.204000 35.768555 80.235580 
 127.204222 35.768555 80.460322 
 127.204333 35.768555 81.408912 
 127.204444 35.768555 81.663363 
 127.204556 35.768555 81.599179 
 127.203444 35.768667 79.009776 
 127.203556 35.768667 79.619341 
 127.203667 35.768667 80.064961 
 127.203778 35.768667 80.375169 
 127.204000 35.768667 80.052600 
 127.204222 35.768667 80.420249 
 127.204333 35.768667 81.284864 
 127.204444 35.768667 81.439061 
 127.204556 35.768667 81.291345 
 127.203556 35.768667 79.619341 
 127.203667 35.768667 80.064961 
 127.203778 35.768667 80.375169 
 127.203889 35.768667 80.306485 
 127.204111 35.768667 80.004013 
 127.204333 35.768667 81.284864 
 127.204444 35.768667 81.439061 
 127.204556 35.768667 81.291345 
 127.204667 35.768667 80.825404 
 127.203556 35.768778 79.745189 
 127.203667 35.768778 79.921572 
 127.203778 35.768778 80.014052 
 127.203889 35.768778 79.969186 
 127.204111 35.768778 79.905663 
 127.204333 35.768778 80.995311 
 127.204444 35.768778 81.053174 
 127.204556 35.768778 80.847377 
 127.204667 35.768778 80.443674 
 127.203556 35.768889 79.796651 
 127.203667 35.768889 79.858327 
 127.203778 35.768889 79.862590 
 127.203889 35.768889 79.835911 
 127.204111 35.768889 79.827378 
 127.204333 35.768889 80.585577 
 127.204444 35.768889 80.591864 
 127.204556 35.768889 80.426697 
 127.204667 35.768889 80.230146 
 127.203667 35.768889 79.858327 
 127.203778 35.768889 79.862590 
 127.203889 35.768889 79.835911 
 127.204000 35.768889 79.813115 
 127.204222 35.768889 80.074120 
 127.204444 35.768889 80.591864 
 127.204556 35.768889 80.426697 
 127.204667 35.768889 80.230146 
 127.204778 35.768889 80.166870 
 127.203667 35.769000 79.826533 
 127.203778 35.769000 79.805444 
 127.203889 35.769000 79.795693 
 127.204000 35.769000 79.789683 
 127.204222 35.769000 79.925178 
 127.204444 35.769000 80.231087 
 127.204556 35.769000 80.164136 
 127.204667 35.769000 80.140888 
 127.204778 35.769000 80.153701 
 127.203667 35.769111 79.806331 
 127.203778 35.769111 79.787311 
 127.203889 35.769111 79.798398 
 127.204000 35.769111 79.801206 
 127.204222 35.769111 79.852589 
 127.204444 35.769111 80.034489 
 127.204556 35.769111 80.043837 
 127.204667 35.769111 80.109856 
 127.204778 35.769111 80.147015 
 127.203778 35.769111 79.787311 
 127.203889 35.769111 79.798398 
 127.204000 35.769111 79.801206 
 127.204111 35.769111 79.786067 
 127.204333 35.769111 80.022258 
 127.204556 35.769111 80.043837 
 127.204667 35.769111 80.109856 
 127.204778 35.769111 80.147015 
 127.204889 35.769111 80.140549 
 127.203778 35.769222 79.794966 
 127.203889 35.769222 79.836780 
 127.204000 35.769222 79.841186 
 127.204111 35.769222 79.802126 
 127.204333 35.769222 79.925272 
 127.204556 35.769222 79.996600 
 127.204667 35.769222 80.099482 
 127.204778 35.769222 80.138243 
 127.204889 35.769222 80.113894 
 127.203778 35.769333 79.835558 
 127.203889 35.769333 79.897482 
 127.204000 35.769333 79.894044 
 127.204111 35.769333 79.836509 
 127.204333 35.769333 79.876093 
 127.204556 35.769333 79.974166 
 127.204667 35.769333 80.091904 
 127.204778 35.769333 80.120350 
 127.204889 35.769333 80.069839 
 127.203778 35.769444 79.900477 
 127.203889 35.769444 79.943109 
 127.204000 35.769444 79.932257 
 127.204111 35.769444 79.869778 
 127.204333 35.769444 79.831982 
 127.204556 35.769444 79.944235 
 127.204667 35.769444 80.073959 
 127.204778 35.769444 80.086492 
 127.204889 35.769444 80.016526 
 127.203889 35.769444 79.943109 
 127.204000 35.769444 79.932257 
 127.204111 35.769444 79.869778 
 127.204222 35.769444 79.813911 
 127.204444 35.769444 79.861882 
 127.204667 35.769444 80.073959 
 127.204778 35.769444 80.086492 
 127.204889 35.769444 80.016526 
 127.205000 35.769444 79.960278 
 127.203889 35.769555 79.962605 
 127.204000 35.769555 79.946843 
 127.204111 35.769555 79.876585 
 127.204222 35.769555 79.800474 
 127.204444 35.769555 79.791999 
 127.204667 35.769555 80.028277 
 127.204778 35.769555 80.036377 
 127.204889 35.769555 79.971807 
 127.205000 35.769555 79.944480 
 127.203889 35.769667 79.967703 
 127.204000 35.769667 79.943934 
 127.204111 35.769667 79.859251 
 127.204222 35.769667 79.786423 
 127.204444 35.769667 79.705086 
 127.204667 35.769667 79.938244 
 127.204778 35.769667 79.981807 
 127.204889 35.769667 79.944887 
 127.205000 35.769667 79.946139 
 127.204000 35.769667 79.943934 
 127.204111 35.769667 79.859251 
 127.204222 35.769667 79.786423 
 127.204333 35.769667 79.739553 
 127.204556 35.769667 79.760476 
 127.204778 35.769667 79.981807 
 127.204889 35.769667 79.944887 
 127.205000 35.769667 79.946139 
 127.205111 35.769667 80.022011 
 127.204000 35.769778 79.927956 
 127.204111 35.769778 79.834147 
 127.204222 35.769778 79.775135 
 127.204333 35.769778 79.711841 
 127.204556 35.769778 79.654734 
 127.204778 35.769778 79.936744 
 127.204889 35.769778 79.934011 
 127.205000 35.769778 79.963204 
 127.205111 35.769778 80.069274 
 127.204000 35.769889 79.900665 
 127.204111 35.769889 79.812067 
 127.204222 35.769889 79.764978 
 127.204333 35.769889 79.690075 
 127.204556 35.769889 79.590771 
 127.204778 35.769889 79.903445 
 127.204889 35.769889 79.935579 
 127.205000 35.769889 79.994757 
 127.205111 35.769889 80.111801 
 127.204111 35.769889 79.812067 
 127.204222 35.769889 79.764978 
 127.204333 35.769889 79.690075 
 127.204444 35.769889 79.606629 
 127.204667 35.769889 79.708444 
 127.204889 35.769889 79.935579 
 127.205000 35.769889 79.994757 
 127.205111 35.769889 80.111801 
 127.205222 35.769889 80.166885 
 127.204111 35.770000 79.795790 
 127.204222 35.770000 79.753385 
 127.204333 35.770000 79.666596 
 127.204444 35.770000 79.575865 
 127.204667 35.770000 79.614091 
 127.204889 35.770000 79.948574 
 127.205000 35.770000 80.035354 
 127.205111 35.770000 80.140702 
 127.205222 35.770000 80.165174 
 127.204111 35.770111 79.783646 
 127.204222 35.770111 79.737648 
 127.204333 35.770111 79.634965 
 127.204444 35.770111 79.527485 
 127.204667 35.770111 79.508064 
 127.204889 35.770111 79.970272 
 127.205000 35.770111 80.070470 
 127.205111 35.770111 80.153739 
 127.205222 35.770111 80.150822 
 127.204222 35.770111 79.737648 
 127.204333 35.770111 79.634965 
 127.204444 35.770111 79.527485 
 127.204556 35.770111 79.457389 
 127.204778 35.770111 79.844409 
 127.205000 35.770111 80.070470 
 127.205111 35.770111 80.153739 
 127.205222 35.770111 80.150822 
 127.205333 35.770111 80.032532 
 127.204222 35.770222 79.714085 
 127.204333 35.770222 79.585468 
 127.204444 35.770222 79.438622 
 127.204556 35.770222 79.323812 
 127.204778 35.770222 79.811879 
 127.205000 35.770222 80.084448 
 127.205111 35.770222 80.151668 
 127.205222 35.770222 80.119955 
 127.205333 35.770222 79.960038 
 127.204222 35.770333 79.677220 
 127.204333 35.770333 79.504181 
 127.204444 35.770333 79.299252 
 127.204556 35.770333 79.155775 
 127.204778 35.770333 79.786590 
 127.205000 35.770333 80.073588 
 127.205111 35.770333 80.134259 
 127.205222 35.770333 80.069191 
 127.205333 35.770333 79.894810 
 127.204333 35.770333 79.504181 
 127.204444 35.770333 79.299252 
 127.204556 35.770333 79.155775 
 127.204667 35.770333 79.250879 
 127.204889 35.770333 79.991710 
 127.205111 35.770333 80.134259 
 127.205222 35.770333 80.069191 
 127.205333 35.770333 79.894810 
 127.205444 35.770333 79.811714 
 127.204333 35.770444 79.381089 
 127.204444 35.770444 79.133090 
 127.204556 35.770444 79.004185 
 127.204667 35.770444 79.162016 
 127.204889 35.770444 79.986666 
 127.205111 35.770444 80.100946 
 127.205222 35.770444 80.002182 
 127.205333 35.770444 79.848378 
 127.205444 35.770444 79.806143 
 127.204333 35.770556 79.228654 
 127.204444 35.770556 78.985821 
 127.204556 35.770556 78.902188 
 127.204667 35.770556 79.120294 
 127.204889 35.770556 79.979989 
 127.205111 35.770556 80.056025 
 127.205222 35.770556 79.933593 
 127.205333 35.770556 79.821297 
 127.205444 35.770556 79.812349 
 127.204444 35.770556 78.985821 
 127.204556 35.770556 78.902188 
 127.204667 35.770556 79.120294 
 127.204778 35.770556 79.763558 
 127.205000 35.770556 80.023399 
 127.205222 35.770556 79.933593 
 127.205333 35.770556 79.821297 
 127.205444 35.770556 79.812349 
 127.205556 35.770556 79.934742 
 127.204444 35.770667 78.882863 
 127.204556 35.770667 78.850753 
 127.204667 35.770667 79.119314 
 127.204778 35.770667 79.742590 
 127.205000 35.770667 80.005705 
 127.205222 35.770667 79.879028 
 127.205333 35.770667 79.808868 
 127.205444 35.770667 79.835469 
 127.205556 35.770667 80.073554 
 127.204444 35.770778 78.822475 
 127.204556 35.770778 78.845498 
 127.204667 35.770778 79.146115 
 127.204778 35.770778 79.679780 
 127.205000 35.770778 79.994991 
 127.205222 35.770778 79.843165 
 127.205333 35.770778 79.807051 
 127.205444 35.770778 79.883410 
 127.205556 35.770778 80.244501 
 127.204556 35.770778 78.845498 
 127.204667 35.770778 79.146115 
 127.204778 35.770778 79.679780 
 127.204889 35.770778 79.949871 
 127.205111 35.770778 79.975858 
 127.205333 35.770778 79.807051 
 127.205444 35.770778 79.883410 
 127.205556 35.770778 80.244501 
 127.205667 35.770778 80.577720 
 127.204556 35.770889 78.891472 
 127.204667 35.770889 79.175100 
 127.204778 35.770889 79.571021 
 127.204889 35.770889 79.912440 
 127.205111 35.770889 79.948732 
 127.205333 35.770889 79.812209 
 127.205444 35.770889 79.948658 
 127.205556 35.770889 80.379218 
 127.205667 35.770889 80.615751 
 127.204556 35.771000 78.979559 
 127.204667 35.771000 79.187569 
 127.204778 35.771000 79.474019 
 127.204889 35.771000 79.875897 
 127.205111 35.771000 79.924037 
 127.205333 35.771000 79.817706 
 127.205444 35.771000 79.997080 
 127.205556 35.771000 80.447106 
 127.205667 35.771000 80.632066 
 127.204556 35.771111 79.063051 
 127.204667 35.771111 79.192764 
 127.204778 35.771111 79.447350 
 127.204889 35.771111 79.880035 
 127.205111 35.771111 79.906293 
 127.205333 35.771111 79.818876 
 127.205444 35.771111 80.009715 
 127.205556 35.771111 80.467972 
 127.205667 35.771111 80.642004 
 127.204667 35.771111 79.192764 
 127.204778 35.771111 79.447350 
 127.204889 35.771111 79.880035 
 127.205000 35.771111 79.983256 
 127.205222 35.771111 79.811641 
 127.205444 35.771111 80.009715 
 127.205556 35.771111 80.467972 
 127.205667 35.771111 80.642004 
 127.205778 35.771111 80.670337 
 127.204667 35.771222 79.206413 
 127.204778 35.771222 79.500871 
 127.204889 35.771222 79.921294 
 127.205000 35.771222 79.979595 
 127.205222 35.771222 79.816761 
 127.205444 35.771222 80.002091 
 127.205556 35.771222 80.472609 
 127.205667 35.771222 80.657642 
 127.205778 35.771222 80.697779 
 127.204667 35.771333 79.240835 
 127.204778 35.771333 79.615076 
 127.204889 35.771333 79.962904 
 127.205000 35.771333 79.971073 
 127.205222 35.771333 79.825310 
 127.205444 35.771333 79.994309 
 127.205556 35.771333 80.488586 
 127.205667 35.771333 80.691772 
 127.205778 35.771333 80.749599 
 127.204778 35.771333 79.615076 
 127.204889 35.771333 79.962904 
 127.205000 35.771333 79.971073 
 127.205111 35.771333 79.893531 
 127.205333 35.771333 79.815895 
 127.205556 35.771333 80.488586 
 127.205667 35.771333 80.691772 
 127.205778 35.771333 80.749599 
 127.205889 35.771333 80.854163 
 127.204778 35.771444 79.752338 
 127.204889 35.771444 79.987186 
 127.205000 35.771444 79.958141 
 127.205111 35.771444 79.888957 
 127.205333 35.771444 79.814196 
 127.205556 35.771444 80.539005 
 127.205667 35.771444 80.748583 
 127.205778 35.771444 80.812046 
 127.205889 35.771444 80.896256 
 127.204778 35.771556 79.871257 
 127.204889 35.771556 79.994155 
 127.205000 35.771556 79.942055 
 127.205111 35.771556 79.883433 
 127.205333 35.771556 79.807889 
 127.205556 35.771556 80.617957 
 127.205667 35.771556 80.807414 
 127.205778 35.771556 80.857171 
 127.205889 35.771556 80.913700 
 127.204889 35.771556 79.994155 
 127.205000 35.771556 79.942055 
 127.205111 35.771556 79.883433 
 127.205222 35.771556 79.837243 
 127.205444 35.771556 80.012068 
 127.205667 35.771556 80.807414 
 127.205778 35.771556 80.857171 
 127.205889 35.771556 80.913700 
 127.206000 35.771556 80.931505 
 127.204889 35.771667 79.987847 
 127.205000 35.771667 79.924228 
 127.205111 35.771667 79.876637 
 127.205222 35.771667 79.832197 
 127.205444 35.771667 80.001475 
 127.205667 35.771667 80.844630 
 127.205778 35.771667 80.879059 
 127.205889 35.771667 80.919500 
 127.206000 35.771667 80.929240 
 127.204889 35.771778 79.971594 
 127.205000 35.771778 79.905656 
 127.205111 35.771778 79.868555 
 127.205222 35.771778 79.824521 
 127.205444 35.771778 79.964101 
 127.205667 35.771778 80.860607 
 127.205778 35.771778 80.886882 
 127.205889 35.771778 80.919748 
 127.206000 35.771778 80.922606 
 127.205000 35.771778 79.905656 
 127.205111 35.771778 79.868555 
 127.205222 35.771778 79.824521 
 127.205333 35.771778 79.786466 
 127.205556 35.771778 80.677742 
 127.205778 35.771778 80.886882 
 127.205889 35.771778 80.919748 
 127.206000 35.771778 80.922606 
 127.206111 35.771778 80.885693 
 127.205000 35.771889 79.887601 
 127.205111 35.771889 79.861677 
 127.205222 35.771889 79.825486 
 127.205333 35.771889 79.796639 
 127.205556 35.771889 80.649879 
 127.205778 35.771889 80.886635 
 127.205889 35.771889 80.914859 
 127.206000 35.771889 80.908279 
 127.206111 35.771889 80.855608 
 127.205000 35.772000 79.873261 
 127.205111 35.772000 79.859339 
 127.205222 35.772000 79.838471 
 127.205333 35.772000 79.836818 
 127.205556 35.772000 80.640943 
 127.205778 35.772000 80.878620 
 127.205889 35.772000 80.901260 
 127.206000 35.772000 80.883335 
 127.206111 35.772000 80.829436 
 127.205111 35.772000 79.859339 
 127.205222 35.772000 79.838471 
 127.205333 35.772000 79.836818 
 127.205444 35.772000 80.010483 
 127.205667 35.772000 80.863126 
 127.205889 35.772000 80.901260 
 127.206000 35.772000 80.883335 
 127.206111 35.772000 80.829436 
 127.206222 35.772000 80.807354 
 127.205111 35.772111 79.861606 
 127.205222 35.772111 79.865197 
 127.205333 35.772111 79.936737 
 127.205444 35.772111 80.195795 
 127.205667 35.772111 80.860288 
 127.205889 35.772111 80.876320 
 127.206000 35.772111 80.853469 
 127.206111 35.772111 80.815684 
 127.206222 35.772111 80.813279 
 127.205111 35.772222 79.868808 
 127.205222 35.772222 79.918778 
 127.205333 35.772222 80.147473 
 127.205444 35.772222 80.500061 
 127.205667 35.772222 80.860020 
 127.205889 35.772222 80.850684 
 127.206000 35.772222 80.833895 
 127.206111 35.772222 80.816462 
 127.206222 35.772222 80.833784 
 127.205222 35.772222 79.918778 
 127.205333 35.772222 80.147473 
 127.205444 35.772222 80.500061 
 127.205556 35.772222 80.813848 
 127.205778 35.772222 80.846556 
 127.206000 35.772222 80.833895 
 127.206111 35.772222 80.816462 
 127.206222 35.772222 80.833784 
 127.206333 35.772222 80.966569 
 127.205222 35.772333 80.034448 
 127.205333 35.772333 80.467810 
 127.205444 35.772333 80.770740 
 127.205556 35.772333 80.895537 
 127.205778 35.772333 80.839087 
 127.206000 35.772333 80.835271 
 127.206111 35.772333 80.835710 
 127.206222 35.772333 80.880251 
 127.206333 35.772333 81.071112 
 127.205222 35.772444 80.263057 
 127.205333 35.772444 80.753850 
 127.205444 35.772444 80.906785 
 127.205556 35.772444 80.931433 
 127.205778 35.772444 80.839098 
 127.206000 35.772444 80.861960 
 127.206111 35.772444 80.885944 
 127.206222 35.772444 80.964297 
 127.206333 35.772444 81.161842 
 127.205333 35.772444 80.753850 
 127.205444 35.772444 80.906785 
 127.205556 35.772444 80.931433 
 127.205667 35.772444 80.869053 
 127.205889 35.772444 80.840096 
 127.206111 35.772444 80.885944 
 127.206222 35.772444 80.964297 
 127.206333 35.772444 81.161842 
 127.206444 35.772444 81.258409 
 127.205333 35.772556 80.901879 
 127.205444 35.772556 80.953955 
 127.205556 35.772556 80.944871 
 127.205667 35.772556 80.879124 
 127.205889 35.772556 80.851467 
 127.206111 35.772556 80.981037 
 127.206222 35.772556 81.074746 
 127.206333 35.772556 81.218339 
 127.206444 35.772556 81.262380 
 127.205333 35.772667 80.954035 
 127.205444 35.772667 80.967254 
 127.205556 35.772667 80.951029 
 127.205667 35.772667 80.896492 
 127.205889 35.772667 80.878572 
 127.206111 35.772667 81.100824 
 127.206222 35.772667 81.169733 
 127.206333 35.772667 81.244615 
 127.206444 35.772667 81.254886 
 127.205333 35.772778 80.968898 
 127.205444 35.772778 80.970481 
 127.205556 35.772778 80.955650 
 127.205667 35.772778 80.921196 
 127.205889 35.772778 80.942288 
 127.206111 35.772778 81.194991 
 127.206222 35.772778 81.225172 
 127.206333 35.772778 81.251293 
 127.206444 35.772778 81.230866 
 127.205444 35.772778 80.970481 
 127.205556 35.772778 80.955650 
 127.205667 35.772778 80.921196 
 127.205778 35.772778 80.898865 
 127.206000 35.772778 81.126803 
 127.206222 35.772778 81.225172 
 127.206333 35.772778 81.251293 
 127.206444 35.772778 81.230866 
 127.206556 35.772778 81.117729 
 127.205444 35.772889 80.970872 
 127.205556 35.772889 80.960102 
 127.205667 35.772889 80.947017 
 127.205778 35.772889 80.958762 
 127.206000 35.772889 81.257302 
 127.206222 35.772889 81.252879 
 127.206333 35.772889 81.244990 
 127.206444 35.772889 81.176986 
 127.206556 35.772889 80.991015 
 127.205444 35.773000 80.970278 
 127.205556 35.773000 80.964383 
 127.205667 35.773000 80.970909 
 127.205778 35.773000 81.049681 
 127.206000 35.773000 81.437582 
 127.206222 35.773000 81.277809 
 127.206333 35.773000 81.230985 
 127.206444 35.773000 81.079938 
 127.206556 35.773000 80.859504 
 127.205556 35.773000 80.964383 
 127.205667 35.773000 80.970909 
 127.205778 35.773000 81.049681 
 127.205889 35.773000 81.354425 
 127.206111 35.773000 81.309964 
 127.206333 35.773000 81.230985 
 127.206444 35.773000 81.079938 
 127.206556 35.773000 80.859504 
 127.206667 35.773000 80.844866 
 127.205556 35.773111 80.969183 
 127.205667 35.773111 80.999908 
 127.205778 35.773111 81.192476 
 127.205889 35.773111 81.704538 
 127.206111 35.773111 81.413749 
 127.206333 35.773111 81.224718 
 127.206444 35.773111 80.960346 
 127.206556 35.773111 80.787454 
 127.206667 35.773111 80.980348 
 127.205556 35.773222 80.976840 
 127.205667 35.773222 81.049141 
 127.205778 35.773222 81.411352 
 127.205889 35.773222 82.022498 
 127.206111 35.773222 81.617936 
 127.206333 35.773222 81.269382 
 127.206444 35.773222 80.883858 
 127.206556 35.773222 80.799352 
 127.206667 35.773222 81.275552 
 127.205667 35.773222 81.049141 
 127.205778 35.773222 81.411352 
 127.205889 35.773222 82.022498 
 127.206000 35.773222 81.992512 
 127.206222 35.773222 81.471504 
 127.206444 35.773222 80.883858 
 127.206556 35.773222 80.799352 
 127.206667 35.773222 81.275552 
 127.206778 35.773222 83.674950 
 127.205667 35.773333 81.141709 
 127.205778 35.773333 81.696609 
 127.205889 35.773333 82.240708 
 127.206000 35.773333 82.234086 
 127.206222 35.773333 81.757282 
 127.206444 35.773333 80.907826 
 127.206556 35.773333 80.907975 
 127.206667 35.773333 81.830021 
 127.206778 35.773333 85.486486 
 127.205667 35.773444 81.304685 
 127.205778 35.773444 81.982721 
 127.205889 35.773444 82.366475 
 127.206000 35.773444 82.391107 
 127.206222 35.773444 82.149852 
 127.206444 35.773444 81.089828 
 127.206556 35.773444 81.175834 
 127.206667 35.773444 82.786483 
 127.206778 35.773444 87.563230 
 127.205778 35.773444 81.982721 
 127.205889 35.773444 82.366475 
 127.206000 35.773444 82.391107 
 127.206111 35.773444 82.265696 
 127.206333 35.773444 81.777359 
 127.206556 35.773444 81.175834 
 127.206667 35.773444 82.786483 
 127.206778 35.773444 87.563230 
 127.206889 35.773444 91.786093 
 127.205778 35.773556 82.202994 
 127.205889 35.773556 82.435550 
 127.206000 35.773556 82.488504 
 127.206111 35.773556 82.505679 
 127.206333 35.773556 82.246896 
 127.206556 35.773556 81.780877 
 127.206667 35.773556 84.284078 
 127.206778 35.773556 89.506900 
 127.206889 35.773556 92.610450 
 127.205778 35.773667 82.340858 
 127.205889 35.773667 82.477326 
 127.206000 35.773667 82.556442 
 127.206111 35.773667 82.641091 
 127.206333 35.773667 82.776063 
 127.206556 35.773667 83.090048 
 127.206667 35.773667 86.305828 
 127.206778 35.773667 91.028035 
 127.206889 35.773667 93.282967 
 127.205889 35.773667 82.477326 
 127.206000 35.773667 82.556442 
 127.206111 35.773667 82.641091 
 127.206222 35.773667 82.692450 
 127.206444 35.773667 82.661656 
 127.206667 35.773667 86.305828 
 127.206778 35.773667 91.028035 
 127.206889 35.773667 93.282967 
 127.207000 35.773667 95.571830 
 127.205889 35.773778 82.511137 
 127.206000 35.773778 82.613224 
 127.206111 35.773778 82.715355 
 127.206222 35.773778 82.831910 
 127.206444 35.773778 84.626189 
 127.206667 35.773778 88.553034 
 127.206778 35.773778 92.118222 
 127.206889 35.773778 94.125481 
 127.207000 35.773778 98.350043 
 127.205889 35.773889 82.548944 
 127.206000 35.773889 82.665331 
 127.206111 35.773889 82.769581 
 127.206222 35.773889 82.984092 
 127.206444 35.773889 87.069275 
 127.206667 35.773889 90.499089 
 127.206778 35.773889 92.954795 
 127.206889 35.773889 95.617820 
 127.207000 35.773889 103.422698 
 127.206000 35.773889 82.665331 
 127.206111 35.773889 82.769581 
 127.206222 35.773889 82.984092 
 127.206333 35.773889 84.128012 
 127.206556 35.773889 88.550046 
 127.206778 35.773889 92.954795 
 127.206889 35.773889 95.617820 
 127.207000 35.773889 103.422698 
 127.207111 35.773889 118.709221 
 127.206000 35.774000 82.715300 
 127.206111 35.774000 82.839309 
 127.206222 35.774000 83.213843 
 127.206333 35.774000 84.972354 
 127.206556 35.774000 90.736989 
 127.206778 35.774000 93.808077 
 127.206889 35.774000 98.494983 
 127.207000 35.774000 110.929193 
 127.207111 35.774000 125.293273 
 127.206000 35.774111 82.772367 
 127.206111 35.774111 82.963004 
 127.206222 35.774111 83.531513 
 127.206333 35.774111 85.641672 
 127.206556 35.774111 91.712105 
 127.206778 35.774111 94.988885 
 127.206889 35.774111 103.534790 
 127.207000 35.774111 119.108934 
 127.207111 35.774111 129.295742 
 127.206111 35.774222 83.160312 
 127.206222 35.774222 83.831742 
 127.206333 35.774222 85.911441 
 127.206444 35.774222 90.100267 
 127.206667 35.774222 92.835678 
 127.206889 35.774222 110.463857 
 127.207000 35.774222 125.402557 
 127.207111 35.774222 131.308427 
 127.207222 35.774222 132.973711 
 127.206111 35.774333 83.384571 
 127.206222 35.774333 84.008408 
 127.206333 35.774333 85.909271 
 127.206444 35.774333 90.150388 
 127.206667 35.774333 93.445144 
 127.206889 35.774333 117.246892 
 127.207000 35.774333 128.965404 
 127.207111 35.774333 132.205316 
 127.207222 35.774333 133.541578 
 127.206111 35.774444 83.557191 
 127.206222 35.774444 84.085455 
 127.206333 35.774444 85.895956 
 127.206444 35.774444 90.476228 
 127.206667 35.774444 94.834470 
 127.206889 35.774444 121.807433 
 127.207000 35.774444 130.383611 
 127.207111 35.774444 132.536229 
 127.207222 35.774444 134.320127 
 127.206222 35.774444 84.085455 
 127.206333 35.774444 85.895956 
 127.206444 35.774444 90.476228 
 127.206556 35.774444 93.387744 
 127.206778 35.774444 102.674135 
 127.207000 35.774444 130.383611 
 127.207111 35.774444 132.536229 
 127.207222 35.774444 134.320127 
 127.207333 35.774444 137.154590 
 127.206222 35.774556 84.142068 
 127.206333 35.774556 86.105529 
 127.206444 35.774556 91.703868 
 127.206556 35.774556 95.677428 
 127.206778 35.774556 107.238736 
 127.207000 35.774556 130.400481 
 127.207111 35.774556 132.547083 
 127.207222 35.774556 135.337743 
 127.207333 35.774556 138.218736 
 127.206222 35.774667 84.250386 
 127.206333 35.774667 86.859331 
 127.206444 35.774667 94.698938 
 127.206556 35.774667 100.007438 
 127.206778 35.774667 112.390931 
 127.207000 35.774667 129.515538 
 127.207111 35.774667 132.279645 
 127.207222 35.774667 136.363965 
 127.207333 35.774667 138.923388 
 127.206333 35.774667 86.859331 
 127.206444 35.774667 94.698938 
 127.206556 35.774667 100.007438 
 127.206667 35.774667 102.686359 
 127.206889 35.774667 124.840761 
 127.207111 35.774667 132.279645 
 127.207222 35.774667 136.363965 
 127.207333 35.774667 138.923388 
 127.207444 35.774667 139.875460 
 127.206333 35.774778 88.790028 
 127.206444 35.774778 99.884945 
 127.206556 35.774778 105.579852 
 127.206667 35.774778 108.291335 
 127.206889 35.774778 125.162300 
 127.207111 35.774778 131.701198 
 127.207222 35.774778 137.188299 
 127.207333 35.774778 139.524904 
 127.207444 35.774778 140.929604 
 127.206333 35.774889 92.843598 
 127.206444 35.774889 105.887726 
 127.206556 35.774889 110.331742 
 127.206667 35.774889 112.742411 
 127.206889 35.774889 125.370538 
 127.207111 35.774889 130.907765 
 127.207222 35.774889 137.893881 
 127.207333 35.774889 140.415221 
 127.207444 35.774889 143.185436 
 127.206444 35.774889 105.887726 
 127.206556 35.774889 110.331742 
 127.206667 35.774889 112.742411 
 127.206778 35.774889 119.971652 
 127.207000 35.774889 127.187498 
 127.207222 35.774889 137.893881 
 127.207333 35.774889 140.415221 
 127.207444 35.774889 143.185436 
 127.207556 35.774889 155.084896 
 127.206444 35.775000 110.561330 
 127.206556 35.775000 113.328431 
 127.206667 35.775000 115.575062 
 127.206778 35.775000 121.968189 
 127.207000 35.775000 126.611765 
 127.207222 35.775000 138.893181 
 127.207333 35.775000 142.083913 
 127.207444 35.775000 146.837076 
 127.207556 35.775000 159.041118 
 127.206444 35.775111 113.333025 
 127.206556 35.775111 115.004919 
 127.206667 35.775111 117.505361 
 127.206778 35.775111 123.628478 
 127.207000 35.775111 126.596351 
 127.207222 35.775111 140.701210 
 127.207333 35.775111 144.675817 
 127.207444 35.775111 150.549241 
 127.207556 35.775111 160.831160 
 127.206556 35.775111 115.004919 
 127.206667 35.775111 117.505361 
 127.206778 35.775111 123.628478 
 127.206889 35.775111 126.080056 
 127.207111 35.775111 130.292548 
 127.207333 35.775111 144.675817 
 127.207444 35.775111 150.549241 
 127.207556 35.775111 160.831160 
 127.207667 35.775111 164.173899 
 127.206556 35.775222 116.041318 
 127.206667 35.775222 119.509976 
 127.206778 35.775222 125.607286 
 127.206889 35.775222 127.058929 
 127.207111 35.775222 131.691800 
 127.207333 35.775222 147.307551 
 127.207444 35.775222 152.807094 
 127.207556 35.775222 161.542275 
 127.207667 35.775222 165.288642 
 127.206556 35.775333 117.046700 
 127.206667 35.775333 122.445158 
 127.206778 35.775333 127.950288 
 127.206889 35.775333 128.838959 
 127.207111 35.775333 135.344848 
 127.207333 35.775333 149.103625 
 127.207444 35.775333 153.830594 
 127.207556 35.775333 162.110999 
 127.207667 35.775333 167.310670 
 127.206667 35.775333 122.445158 
 127.206778 35.775333 127.950288 
 127.206889 35.775333 128.838959 
 127.207000 35.775333 129.968413 
 127.207222 35.775333 145.831421 
 127.207444 35.775333 153.830594 
 127.207556 35.775333 162.110999 
 127.207667 35.775333 167.310670 
 127.207778 35.775333 172.028513 
 127.206667 35.775444 126.116606 
 127.206778 35.775444 130.018228 
 127.206889 35.775444 131.330971 
 127.207000 35.775444 135.164513 
 127.207222 35.775444 148.136545 
 127.207444 35.775444 154.971986 
 127.207556 35.775444 163.678538 
 127.207667 35.775444 170.086646 
 127.207778 35.775444 173.621815 
 127.206667 35.775556 129.140199 
 127.206778 35.775556 131.500721 
 127.206889 35.775556 134.283334 
 127.207000 35.775556 142.374619 
 127.207222 35.775556 150.666719 
 127.207444 35.775556 158.111622 
 127.207556 35.775556 167.915834 
 127.207667 35.775556 173.151715 
 127.207778 35.775556 175.432649 
 127.206778 35.775556 131.500721 
 127.206889 35.775556 134.283334 
 127.207000 35.775556 142.374619 
 127.207111 35.775556 149.374938 
 127.207333 35.775556 151.952532 
 127.207556 35.775556 167.915834 
 127.207667 35.775556 173.151715 
 127.207778 35.775556 175.432649 
 127.207889 35.775556 179.557329 
 127.206778 35.775667 132.677087 
 127.206889 35.775667 137.751457 
 127.207000 35.775667 149.205260 
 127.207111 35.775667 155.166246 
 127.207333 35.775667 155.195689 
 127.207556 35.775667 174.748740 
 127.207667 35.775667 176.678304 
 127.207778 35.775667 178.762692 
 127.207889 35.775667 185.250463 
 127.206778 35.775778 134.011139 
 127.206889 35.775778 141.970434 
 127.207000 35.775778 154.150415 
 127.207111 35.775778 158.446422 
 127.207333 35.775778 161.126031 
 127.207556 35.775778 180.502634 
 127.207667 35.775778 180.785484 
 127.207778 35.775778 183.633354 
 127.207889 35.775778 190.290349 
 127.206778 35.775889 136.019118 
 127.206889 35.775889 146.863730 
 127.207000 35.775889 157.277307 
 127.207111 35.775889 160.309178 
 127.207333 35.775889 168.257015 
 127.207556 35.775889 183.383278 
 127.207667 35.775889 184.075484 
 127.207778 35.775889 187.635075 
 127.207889 35.775889 194.090991 
 127.206889 35.775889 146.863730 
 127.207000 35.775889 157.277307 
 127.207111 35.775889 160.309178 
 127.207222 35.775889 161.981762 
 127.207444 35.775889 179.065167 
 127.207667 35.775889 184.075484 
 127.207778 35.775889 187.635075 
 127.207889 35.775889 194.090991 
 127.208000 35.775889 206.834577 
 127.206889 35.776000 151.717965 
 127.207000 35.776000 159.188967 
 127.207111 35.776000 161.796959 
 127.207222 35.776000 165.001001 
 127.207444 35.776000 181.745089 
 127.207667 35.776000 185.533006 
 127.207778 35.776000 189.889890 
 127.207889 35.776000 197.963971 
 127.208000 35.776000 209.466491 
 127.206889 35.776111 155.660582 
 127.207000 35.776111 160.511984 
 127.207111 35.776111 163.448255 
 127.207222 35.776111 166.924418 
 127.207444 35.776111 181.399500 
 127.207667 35.776111 185.734523 
 127.207778 35.776111 191.317340 
 127.207889 35.776111 202.145146 
 127.208000 35.776111 210.640050 
 127.207000 35.776111 160.511984 
 127.207111 35.776111 163.448255 
 127.207222 35.776111 166.924418 
 127.207333 35.776111 172.263863 
 127.207556 35.776111 184.340955 
 127.207778 35.776111 191.317340 
 127.207889 35.776111 202.145146 
 127.208000 35.776111 210.640050 
 127.208111 35.776111 209.684669 
 127.207000 35.776222 161.732456 
 127.207111 35.776222 165.216139 
 127.207222 35.776222 167.919236 
 127.207333 35.776222 170.467442 
 127.207556 35.776222 183.016936 
 127.207778 35.776222 191.454183 
 127.207889 35.776222 204.590988 
 127.208000 35.776222 209.683007 
 127.208111 35.776222 205.810337 
 127.207000 35.776333 163.143211 
 127.207111 35.776333 166.721705 
 127.207222 35.776333 168.269574 
 127.207333 35.776333 168.255655 
 127.207556 35.776333 179.598444 
 127.207778 35.776333 188.721595 
 127.207889 35.776333 201.688190 
 127.208000 35.776333 204.955918 
 127.208111 35.776333 200.434753 
 127.207111 35.776333 166.721705 
 127.207222 35.776333 168.269574 
 127.207333 35.776333 168.255655 
 127.207444 35.776333 171.596700 
 127.207667 35.776333 184.402069 
 127.207889 35.776333 201.688190 
 127.208000 35.776333 204.955918 
 127.208111 35.776333 200.434753 
 127.208222 35.776333 197.782028 
 127.207111 35.776444 167.717184 
 127.207222 35.776444 168.155663 
 127.207333 35.776444 165.996454 
 127.207444 35.776444 165.657515 
 127.207667 35.776444 183.630118 
 127.207889 35.776444 191.436395 
 127.208000 35.776444 194.328903 
 127.208111 35.776444 194.964568 
 127.208222 35.776444 196.347304 
 127.207111 35.776556 168.237930 
 127.207222 35.776556 167.620708 
 127.207333 35.776556 163.865887 
 127.207444 35.776556 162.138262 
 127.207667 35.776556 182.805475 
 127.207889 35.776556 178.307008 
 127.208000 35.776556 180.189827 
 127.208111 35.776556 189.777880 
 127.208222 35.776556 194.252329 
 127.207222 35.776556 167.620708 
 127.207333 35.776556 163.865887 
 127.207444 35.776556 162.138262 
 127.207556 35.776556 170.778475 
 127.207778 35.776556 182.585448 
 127.208000 35.776556 180.189827 
 127.208111 35.776556 189.777880 
 127.208222 35.776556 194.252329 
 127.208333 35.776556 188.179877 
 127.207222 35.776667 166.635130 
 127.207333 35.776667 162.001075 
 127.207444 35.776667 159.971289 
 127.207556 35.776667 166.756489 
 127.207778 35.776667 179.788198 
 127.208000 35.776667 169.410678 
 127.208111 35.776667 184.098241 
 127.208222 35.776667 190.562576 
 127.208333 35.776667 182.297589 
 127.207222 35.776778 165.181059 
 127.207333 35.776778 160.142830 
 127.207444 35.776778 157.200791 
 127.207556 35.776778 160.320744 
 127.207778 35.776778 174.660067 
 127.208000 35.776778 163.585772 
 127.208111 35.776778 177.443672 
 127.208222 35.776778 184.769039 
 127.208333 35.776778 177.356876 
 127.207333 35.776778 160.142830 
 127.207444 35.776778 157.200791 
 127.207556 35.776778 160.320744 
 127.207667 35.776778 175.638571 
 127.207889 35.776778 163.562972 
 127.208111 35.776778 177.443672 
 127.208222 35.776778 184.769039 
 127.208333 35.776778 177.356876 
 127.208444 35.776778 173.557496 
 127.207333 35.776889 157.275686 
 127.207444 35.776889 151.861962 
 127.207556 35.776889 150.291375 
 127.207667 35.776889 162.854615 
 127.207889 35.776889 160.057887 
 127.208111 35.776889 170.538137 
 127.208222 35.776889 178.188729 
 127.208333 35.776889 174.540337 
 127.208444 35.776889 173.169394 
 127.207333 35.777000 151.898253 
 127.207444 35.777000 144.278352 
 127.207556 35.777000 141.313995 
 127.207667 35.777000 149.065484 
 127.207889 35.777000 156.864026 
 127.208111 35.777000 164.608944 
 127.208222 35.777000 173.101719 
 127.208333 35.777000 173.265926 
 127.208444 35.777000 173.031864 
 127.207444 35.777000 144.278352 
 127.207556 35.777000 141.313995 
 127.207667 35.777000 149.065484 
 127.207778 35.777000 153.399170 
 127.208000 35.777000 158.749775 
 127.208222 35.777000 173.101719 
 127.208333 35.777000 173.265926 
 127.208444 35.777000 173.031864 
 127.208556 35.777000 173.078033 
 127.207444 35.777111 138.130402 
 127.207556 35.777111 136.927978 
 127.207667 35.777111 142.902599 
 127.207778 35.777111 146.833443 
 127.208000 35.777111 156.626704 
 127.208222 35.777111 169.207004 
 127.208333 35.777111 172.549960 
 127.208444 35.777111 172.978652 
 127.208556 35.777111 173.126265 
 127.207444 35.777222 135.040396 
 127.207556 35.777222 135.483313 
 127.207667 35.777222 141.250886 
 127.207778 35.777222 144.100991 
 127.208000 35.777222 153.026203 
 127.208222 35.777222 164.303791 
 127.208333 35.777222 171.647994 
 127.208444 35.777222 172.938818 
 127.208556 35.777222 173.210328 
 127.207444 35.777333 133.826324 
 127.207556 35.777333 135.145495 
 127.207667 35.777333 140.719238 
 127.207778 35.777333 142.391114 
 127.208000 35.777333 148.826106 
 127.208222 35.777333 157.895489 
 127.208333 35.777333 170.027108 
 127.208444 35.777333 172.884893 
 127.208556 35.777333 173.367575 
 127.207556 35.777333 135.145495 
 127.207667 35.777333 140.719238 
 127.207778 35.777333 142.391114 
 127.207889 35.777333 144.714354 
 127.208111 35.777333 149.515314 
 127.208333 35.777333 170.027108 
 127.208444 35.777333 172.884893 
 127.208556 35.777333 173.367575 
 127.208667 35.777333 174.481506 
 127.207556 35.777445 135.185868 
 127.207667 35.777445 140.028867 
 127.207778 35.777445 140.449633 
 127.207889 35.777445 141.492687 
 127.208111 35.777445 147.554689 
 127.208333 35.777445 167.694699 
 127.208444 35.777445 172.797679 
 127.208556 35.777445 173.669711 
 127.208667 35.777445 175.638846 
 127.207556 35.777556 135.414645 
 127.207667 35.777556 138.792732 
 127.207778 35.777556 138.535149 
 127.207889 35.777556 139.785764 
 127.208111 35.777556 147.112340 
 127.208333 35.777556 165.353698 
 127.208444 35.777556 172.606578 
 127.208556 35.777556 174.231882 
 127.208667 35.777556 177.359172 
 127.207667 35.777556 138.792732 
 127.207778 35.777556 138.535149 
 127.207889 35.777556 139.785764 
 127.208000 35.777556 145.389257 
 127.208222 35.777556 150.554975 
 127.208444 35.777556 172.606578 
 127.208556 35.777556 174.231882 
 127.208667 35.777556 177.359172 
 127.208778 35.777556 181.750766 
 127.207667 35.777667 137.544995 
 127.207778 35.777667 137.411702 
 127.207889 35.777667 139.339353 
 127.208000 35.777667 145.889461 
 127.208222 35.777667 150.975659 
 127.208444 35.777667 172.096625 
 127.208556 35.777667 175.187933 
 127.208667 35.777667 179.426022 
 127.208778 35.777667 183.078674 
 127.207667 35.777778 136.887853 
 127.207778 35.777778 137.067101 
 127.207889 35.777778 140.183334 
 127.208000 35.777778 148.591696 
 127.208222 35.777778 153.602739 
 127.208444 35.777778 170.941050 
 127.208556 35.777778 176.546862 
 127.208667 35.777778 181.355129 
 127.208778 35.777778 184.044010 
 127.207778 35.777778 137.067101 
 127.207889 35.777778 140.183334 
 127.208000 35.777778 148.591696 
 127.208111 35.777778 150.223432 
 127.208333 35.777778 163.154667 
 127.208556 35.777778 176.546862 
 127.208667 35.777778 181.355129 
 127.208778 35.777778 184.044010 
 127.208889 35.777778 186.940504 
 127.207778 35.777889 137.253160 
 127.207889 35.777889 143.079221 
 127.208000 35.777889 154.162173 
 127.208111 35.777889 154.993193 
 127.208333 35.777889 163.348341 
 127.208556 35.777889 178.079270 
 127.208667 35.777889 182.863842 
 127.208778 35.777889 184.933265 
 127.208889 35.777889 189.009595 
 127.207778 35.778000 138.073553 
 127.207889 35.778000 148.696491 
 127.208000 35.778000 160.287477 
 127.208111 35.778000 160.384723 
 127.208333 35.778000 163.802524 
 127.208556 35.778000 179.709826 
 127.208667 35.778000 184.138599 
 127.208778 35.778000 186.109902 
 127.208889 35.778000 192.104261 
 127.207889 35.778000 148.696491 
 127.208000 35.778000 160.287477 
 127.208111 35.778000 160.384723 
 127.208222 35.778000 161.017232 
 127.208444 35.778000 168.300728 
 127.208667 35.778000 184.138599 
 127.208778 35.778000 186.109902 
 127.208889 35.778000 192.104261 
 127.209000 35.778000 203.416173 
 127.207889 35.778111 155.685332 
 127.208000 35.778111 164.243809 
 127.208111 35.778111 164.088839 
 127.208222 35.778111 163.444079 
 127.208444 35.778111 169.051603 
 127.208667 35.778111 185.832275 
 127.208778 35.778111 188.049238 
 127.208889 35.778111 196.255751 
 127.209000 35.778111 206.533466 
 127.207889 35.778222 161.273750 
 127.208000 35.778222 166.152625 
 127.208111 35.778222 166.352125 
 127.208222 35.778222 165.994989 
 127.208444 35.778222 172.542780 
 127.208667 35.778222 188.945804 
 127.208778 35.778222 191.276679 
 127.208889 35.778222 200.875639 
 127.209000 35.778222 208.673924 
 127.208000 35.778222 166.152625 
 127.208111 35.778222 166.352125 
 127.208222 35.778222 165.994989 
 127.208333 35.778222 166.179883 
 127.208556 35.778222 187.441089 
 127.208778 35.778222 191.276679 
 127.208889 35.778222 200.875639 
 127.209000 35.778222 208.673924 
 127.209111 35.778222 211.038053 
 127.208000 35.778333 167.160120 
 127.208111 35.778333 169.054724 
 127.208222 35.778333 171.072227 
 127.208333 35.778333 170.356683 
 127.208556 35.778333 194.139989 
 127.208778 35.778333 195.913232 
 127.208889 35.778333 204.982600 
 127.209000 35.778333 210.008459 
 127.209111 35.778333 211.576303 
 127.208000 35.778445 168.356545 
 127.208111 35.778445 174.722623 
 127.208222 35.778445 179.588032 
 127.208333 35.778445 178.207767 
 127.208556 35.778445 199.394843 
 127.208778 35.778445 201.030867 
 127.208889 35.778445 208.012762 
 127.209000 35.778445 210.893705 
 127.209111 35.778445 212.410672 
 127.208111 35.778556 183.033419 
 127.208222 35.778556 187.041056 
 127.208333 35.778556 186.630780 
 127.208444 35.778556 195.907892 
 127.208667 35.778556 202.424266 
 127.208889 35.778556 210.219215 
 127.209000 35.778556 211.752536 
 127.209111 35.778556 213.964290 
 127.209222 35.778556 220.926383 
 127.208111 35.778667 188.987950 
 127.208222 35.778667 190.697845 
 127.208333 35.778667 191.797724 
 127.208444 35.778667 199.668882 
 127.208667 35.778667 204.162617 
 127.208889 35.778667 212.552996 
 127.209000 35.778667 213.149962 
 127.209111 35.778667 216.749478 
 127.209222 35.778667 225.971086 
 127.208111 35.778778 191.408136 
 127.208222 35.778778 192.095370 
 127.208333 35.778778 194.306163 
 127.208444 35.778778 200.898141 
 127.208667 35.778778 205.613615 
 127.208889 35.778778 216.095334 
 127.209000 35.778778 215.774257 
 127.209111 35.778778 220.895428 
 127.209222 35.778778 230.313960 
 127.208222 35.778778 192.095370 
 127.208333 35.778778 194.306163 
 127.208444 35.778778 200.898141 
 127.208556 35.778778 203.747379 
 127.208778 35.778778 212.628522 
 127.209000 35.778778 215.774257 
 127.209111 35.778778 220.895428 
 127.209222 35.778778 230.313960 
 127.209333 35.778778 234.875548 
 127.208222 35.778889 192.764331 
 127.208333 35.778889 195.910621 
 127.208444 35.778889 200.748922 
 127.208556 35.778889 204.363026 
 127.208778 35.778889 217.382071 
 127.209000 35.778889 219.776806 
 127.209111 35.778889 225.502742 
 127.209222 35.778889 233.131677 
 127.209333 35.778889 235.490403 
 127.208222 35.779000 193.470499 
 127.208333 35.779000 197.155407 
 127.208444 35.779000 200.262629 
 127.208556 35.779000 205.845767 
 127.208778 35.779000 221.526527 
 127.209000 35.779000 223.676279 
 127.209111 35.779000 228.846553 
 127.209222 35.779000 234.431207 
 127.209333 35.779000 235.357796 
 127.208333 35.779000 197.155407 
 127.208444 35.779000 200.262629 
 127.208556 35.779000 205.845767 
 127.208667 35.779000 211.447455 
 127.208889 35.779000 224.476027 
 127.209111 35.779000 228.846553 
 127.209222 35.779000 234.431207 
 127.209333 35.779000 235.357796 
 127.209444 35.779000 231.779037 
 127.208333 35.779111 197.887191 
 127.208444 35.779111 200.141841 
 127.208556 35.779111 208.109379 
 127.208667 35.779111 214.159998 
 127.208889 35.779111 226.417291 
 127.209111 35.779111 229.429167 
 127.209222 35.779111 234.285582 
 127.209333 35.779111 234.376053 
 127.209444 35.779111 227.721570 
 127.208333 35.779222 198.213521 
 127.208444 35.779222 200.509612 
 127.208556 35.779222 210.058622 
 127.208667 35.779222 214.985804 
 127.208889 35.779222 226.769323 
 127.209111 35.779222 225.793679 
 127.209222 35.779222 232.055886 
 127.209333 35.779222 232.044636 
 127.209444 35.779222 222.049568 
 127.208444 35.779222 200.509612 
 127.208556 35.779222 210.058622 
 127.208667 35.779222 214.985804 
 127.208778 35.779222 224.205000 
 127.209000 35.779222 224.303877 
 127.209222 35.779222 232.055886 
 127.209333 35.779222 232.044636 
 127.209444 35.779222 222.049568 
 127.209556 35.779222 209.567919 
 127.208444 35.779333 201.286562 
 127.208556 35.779333 210.858608 
 127.208667 35.779333 213.776893 
 127.208778 35.779333 222.592741 
 127.209000 35.779333 219.433336 
 127.209222 35.779333 226.049928 
 127.209333 35.779333 227.533411 
 127.209444 35.779333 215.827819 
 127.209556 35.779333 206.646328 
 127.208444 35.779444 202.291551 
 127.208556 35.779444 209.406278 
 127.208667 35.779444 209.508133 
 127.208778 35.779444 217.315073 
 127.209000 35.779444 210.393879 
 127.209222 35.779444 214.763940 
 127.209333 35.779444 220.174860 
 127.209444 35.779444 210.288729 
 127.209556 35.779444 204.764421 
 127.208556 35.779444 209.406278 
 127.208667 35.779444 209.508133 
 127.208778 35.779444 217.315073 
 127.208889 35.779444 221.155141 
 127.209111 35.779444 203.182084 
 127.209333 35.779444 220.174860 
 127.209444 35.779444 210.288729 
 127.209556 35.779444 204.764421 
 127.209667 35.779444 203.208661 
 127.208556 35.779555 204.675533 
 127.208667 35.779555 203.259257 
 127.208778 35.779555 208.263678 
 127.208889 35.779555 211.301067 
 127.209111 35.779555 191.343707 
 127.209333 35.779555 210.509882 
 127.209444 35.779555 205.662301 
 127.209556 35.779555 203.116765 
 127.209667 35.779555 201.907561 
 127.208556 35.779667 199.682384 
 127.208667 35.779667 198.951935 
 127.208778 35.779667 199.963250 
 127.208889 35.779667 199.309194 
 127.209111 35.779667 184.131538 
 127.209333 35.779667 200.098507 
 127.209444 35.779667 200.870311 
 127.209556 35.779667 200.706162 
 127.209667 35.779667 199.351957 
 127.208667 35.779667 198.951935 
 127.208778 35.779667 199.963250 
 127.208889 35.779667 199.309194 
 127.209000 35.779667 189.700823 
 127.209222 35.779667 189.603524 
 127.209444 35.779667 200.870311 
 127.209556 35.779667 200.706162 
 127.209667 35.779667 199.351957 
 127.209778 35.779667 192.574939 
 127.208667 35.779778 197.017123 
 127.208778 35.779778 195.036465 
 127.208889 35.779778 192.118146 
 127.209000 35.779778 183.970199 
 127.209222 35.779778 182.855708 
 127.209444 35.779778 194.248912 
 127.209556 35.779778 196.260911 
 127.209667 35.779778 194.734762 
 127.209778 35.779778 187.226368 
 127.208667 35.779889 196.053212 
 127.208778 35.779889 191.957635 
 127.208889 35.779889 188.143917 
 127.209000 35.779889 179.753046 
 127.209222 35.779889 178.412848 
 127.209444 35.779889 185.124529 
 127.209556 35.779889 188.905828 
 127.209667 35.779889 188.296672 
 127.209778 35.779889 183.182143 
 127.208667 35.780000 195.091284 
 127.208778 35.780000 187.199741 
 127.208889 35.780000 182.018929 
 127.209000 35.780000 173.826781 
 127.209222 35.780000 173.813269 
 127.209444 35.780000 175.815056 
 127.209556 35.780000 180.154646 
 127.209667 35.780000 182.149707 
 127.209778 35.780000 180.965236 
 127.208778 35.780000 187.199741 
 127.208889 35.780000 182.018929 
 127.209000 35.780000 173.826781 
 127.209111 35.780000 172.167491 
 127.209333 35.780000 173.122129 
 127.209556 35.780000 180.154646 
 127.209667 35.780000 182.149707 
 127.209778 35.780000 180.965236 
 127.209889 35.780000 180.749881 
 127.208778 35.780111 177.367392 
 127.208889 35.780111 172.462107 
 127.209000 35.780111 165.837609 
 127.209111 35.780111 165.219516 
 127.209333 35.780111 167.891893 
 127.209556 35.780111 173.268713 
 127.209667 35.780111 178.118630 
 127.209778 35.780111 180.058687 
 127.209889 35.780111 181.159434 
 127.208778 35.780222 169.179637 
 127.208889 35.780222 166.366878 
 127.209000 35.780222 159.481712 
 127.209111 35.780222 159.132368 
 127.209333 35.780222 164.894247 
 127.209556 35.780222 169.446751 
 127.209667 35.780222 176.119408 
 127.209778 35.780222 179.926044 
 127.209889 35.780222 182.107652 
 127.208889 35.780222 166.366878 
 127.209000 35.780222 159.481712 
 127.209111 35.780222 159.132368 
 127.209222 35.780222 162.622683 
 127.209444 35.780222 166.084713 
 127.209667 35.780222 176.119408 
 127.209778 35.780222 179.926044 
 127.209889 35.780222 182.107652 
 127.210000 35.780222 186.751750 
 127.208889 35.780333 163.737995 
 127.209000 35.780333 155.989625 
 127.209111 35.780333 155.867837 
 127.209222 35.780333 159.455733 
 127.209444 35.780333 164.758452 
 127.209667 35.780333 175.373758 
 127.209778 35.780333 180.349742 
 127.209889 35.780333 183.747741 
 127.210000 35.780333 189.645007 
 127.208889 35.780444 161.491549 
 127.209000 35.780444 154.261264 
 127.209111 35.780444 154.908624 
 127.209222 35.780444 158.602665 
 127.209444 35.780444 164.518453 
 127.209667 35.780444 175.383641 
 127.209778 35.780444 181.381672 
 127.209889 35.780444 186.218931 
 127.210000 35.780444 192.595819 
 127.209000 35.780444 154.261264 
 127.209111 35.780444 154.908624 
 127.209222 35.780444 158.602665 
 127.209333 35.780444 162.480488 
 127.209556 35.780444 167.544697 
 127.209778 35.780444 181.381672 
 127.209889 35.780444 186.218931 
 127.210000 35.780444 192.595819 
 127.210111 35.780444 197.129106 
 127.209000 35.780555 153.708489 
 127.209111 35.780555 155.466950 
 127.209222 35.780555 158.972139 
 127.209333 35.780555 162.222614 
 127.209556 35.780555 168.444677 
 127.209778 35.780555 183.204935 
 127.209889 35.780555 189.348900 
 127.210000 35.780555 195.083645 
 127.210111 35.780555 198.314587 
 127.209000 35.780667 154.191373 
 127.209111 35.780667 156.882708 
 127.209222 35.780667 159.630123 
 127.209333 35.780667 162.626295 
 127.209556 35.780667 170.910040 
 127.209778 35.780667 185.855521 
 127.209889 35.780667 192.544936 
 127.210000 35.780667 196.918669 
 127.210111 35.780667 199.406382 
 127.209111 35.780667 156.882708 
 127.209222 35.780667 159.630123 
 127.209333 35.780667 162.626295 
 127.209444 35.780667 167.286544 
 127.209667 35.780667 177.534106 
 127.209889 35.780667 192.544936 
 127.210000 35.780667 196.918669 
 127.210111 35.780667 199.406382 
 127.210222 35.780667 202.300079 
 127.209111 35.780778 158.350413 
 127.209222 35.780778 160.318364 
 127.209333 35.780778 163.869440 
 127.209444 35.780778 170.556798 
 127.209667 35.780778 179.464728 
 127.209889 35.780778 195.127192 
 127.210000 35.780778 198.249644 
 127.210111 35.780778 200.669469 
 127.210222 35.780778 204.415550 
 127.209111 35.780889 159.449593 
 127.209222 35.780889 161.241694 
 127.209333 35.780889 166.135664 
 127.209444 35.780889 173.940570 
 127.209667 35.780889 180.950486 
 127.209889 35.780889 196.861146 
 127.210000 35.780889 199.385058 
 127.210111 35.780889 202.314930 
 127.210222 35.780889 206.879334 
 127.209222 35.780889 161.241694 
 127.209333 35.780889 166.135664 
 127.209444 35.780889 173.940570 
 127.209556 35.780889 177.234861 
 127.209778 35.780889 190.827055 
 127.210000 35.780889 199.385058 
 127.210111 35.780889 202.314930 
 127.210222 35.780889 206.879334 
 127.210333 35.780889 211.432104 
 127.209222 35.781000 162.839025 
 127.209333 35.781000 169.415438 
 127.209444 35.781000 176.448697 
 127.209556 35.781000 178.733694 
 127.209778 35.781000 191.695980 
 127.210000 35.781000 200.631183 
 127.210111 35.781000 204.427896 
 127.210222 35.781000 209.355323 
 127.210333 35.781000 212.944984 
 127.209222 35.781111 165.648146 
 127.209333 35.781111 173.068278 
 127.209444 35.781111 177.966042 
 127.209556 35.781111 179.614774 
 127.209778 35.781111 192.121844 
 127.210000 35.781111 202.174640 
 127.210111 35.781111 206.853868 
 127.210222 35.781111 211.457069 
 127.210333 35.781111 213.746973 
 127.209333 35.781111 173.068278 
 127.209444 35.781111 177.966042 
 127.209556 35.781111 179.614774 
 127.209667 35.781111 182.953025 
 127.209889 35.781111 198.730599 
 127.210111 35.781111 206.853868 
 127.210222 35.781111 211.457069 
 127.210333 35.781111 213.746973 
 127.210444 35.781111 213.169523 
 127.209333 35.781222 176.059776 
 127.209444 35.781222 178.864805 
 127.209556 35.781222 180.529059 
 127.209667 35.781222 184.807769 
 127.209889 35.781222 199.321406 
 127.210111 35.781222 209.223862 
 127.210222 35.781222 212.958441 
 127.210333 35.781222 213.815716 
 127.210444 35.781222 211.502709 
 127.209333 35.781333 177.889627 
 127.209444 35.781333 179.554433 
 127.209556 35.781333 181.901185 
 127.209667 35.781333 187.529872 
 127.209889 35.781333 199.548088 
 127.210111 35.781333 211.048128 
 127.210222 35.781333 213.779856 
 127.210333 35.781333 213.149970 
 127.210444 35.781333 209.301919 
 127.209333 35.781444 178.872393 
 127.209444 35.781444 180.391836 
 127.209556 35.781444 184.024776 
 127.209667 35.781444 190.687542 
 127.209889 35.781444 199.091740 
 127.210111 35.781444 211.788696 
 127.210222 35.781444 213.873495 
 127.210333 35.781444 211.815080 
 127.210444 35.781444 207.109005 
 127.209444 35.781444 180.391836 
 127.209556 35.781444 184.024776 
 127.209667 35.781444 190.687542 
 127.209778 35.781444 196.073527 
 127.210000 35.781444 205.397483 
 127.210222 35.781444 213.873495 
 127.210333 35.781444 211.815080 
 127.210444 35.781444 207.109005 
 127.210556 35.781444 203.795597 
 127.209444 35.781555 181.693866 
 127.209556 35.781555 186.928838 
 127.209667 35.781555 193.543674 
 127.209778 35.781555 196.952623 
 127.210000 35.781555 202.518770 
 127.210222 35.781555 212.998355 
 127.210333 35.781555 209.961271 
 127.210444 35.781555 205.243307 
 127.210556 35.781555 202.178555 
 127.209444 35.781667 183.736696 
 127.209556 35.781667 190.227300 
 127.209667 35.781667 195.604034 
 127.209778 35.781667 197.142833 
 127.210000 35.781667 195.856145 
 127.210222 35.781667 210.368245 
 127.210333 35.781667 207.619593 
 127.210444 35.781667 203.574772 
 127.210556 35.781667 200.028289 
 127.209556 35.781667 190.227300 
 127.209667 35.781667 195.604034 
 127.209778 35.781667 197.142833 
 127.209889 35.781667 195.593255 
 127.210111 35.781667 205.329571 
 127.210333 35.781667 207.619593 
 127.210444 35.781667 203.574772 
 127.210556 35.781667 200.028289 
 127.210667 35.781667 192.313241 
 127.209556 35.781778 193.228260 
 127.209667 35.781778 196.771262 
 127.209778 35.781778 196.594428 
 127.209889 35.781778 192.078315 
 127.210111 35.781778 194.153922 
 127.210333 35.781778 204.335583 
 127.210444 35.781778 201.575267 
 127.210556 35.781778 196.600861 
 127.210667 35.781778 186.723438 
 127.209556 35.781889 195.420367 
 127.209667 35.781889 197.149556 
 127.209778 35.781889 195.122389 
 127.209889 35.781889 186.942963 
 127.210111 35.781889 179.427250 
 127.210333 35.781889 198.827630 
 127.210444 35.781889 198.283776 
 127.210556 35.781889 191.708380 
 127.210667 35.781889 182.483646 
 127.209667 35.781889 197.149556 
 127.209778 35.781889 195.122389 
 127.209889 35.781889 186.942963 
 127.210000 35.781889 175.983620 
 127.210222 35.781889 192.973561 
 127.210444 35.781889 198.283776 
 127.210556 35.781889 191.708380 
 127.210667 35.781889 182.483646 
 127.210778 35.781889 180.112016 
 127.209667 35.782000 196.788710 
 127.209778 35.782000 192.354186 
 127.209889 35.782000 180.336764 
 127.210000 35.782000 167.963830 
 127.210222 35.782000 179.497389 
 127.210444 35.782000 192.532121 
 127.210556 35.782000 186.298985 
 127.210667 35.782000 180.140821 
 127.210778 35.782000 180.750483 
 127.209667 35.782111 195.556634 
 127.209778 35.782111 187.906756 
 127.209889 35.782111 173.291090 
 127.210000 35.782111 162.841066 
 127.210222 35.782111 170.392914 
 127.210444 35.782111 184.646705 
 127.210556 35.782111 181.758160 
 127.210667 35.782111 179.310658 
 127.210778 35.782111 182.464928 
 127.209778 35.782111 187.906756 
 127.209889 35.782111 173.291090 
 127.210000 35.782111 162.841066 
 127.210111 35.782111 162.320841 
 127.210333 35.782111 180.040779 
 127.210556 35.782111 181.758160 
 127.210667 35.782111 179.310658 
 127.210778 35.782111 182.464928 
 127.210889 35.782111 189.051645 
 127.209778 35.782222 181.765928 
 127.209889 35.782222 167.146812 
 127.210000 35.782222 159.976767 
 127.210111 35.782222 160.245178 
 127.210333 35.782222 173.912027 
 127.210556 35.782222 178.582420 
 127.210667 35.782222 179.600103 
 127.210778 35.782222 184.927038 
 127.210889 35.782222 190.780510 
 127.209778 35.782333 174.784205 
 127.209889 35.782333 162.711626 
 127.210000 35.782333 158.536571 
 127.210111 35.782333 159.871656 
 127.210333 35.782333 171.785090 
 127.210556 35.782333 176.562798 
 127.210667 35.782333 180.834299 
 127.210778 35.782333 187.568499 
 127.210889 35.782333 192.325272 
 127.209889 35.782333 162.711626 
 127.210000 35.782333 158.536571 
 127.210111 35.782333 159.871656 
 127.210222 35.782333 166.371940 
 127.210444 35.782333 174.078749 
 127.210667 35.782333 180.834299 
 127.210778 35.782333 187.568499 
 127.210889 35.782333 192.325272 
 127.211000 35.782333 197.413797 
 127.209889 35.782444 159.930584 
 127.210000 35.782444 157.930806 
 127.210111 35.782444 160.370638 
 127.210222 35.782444 167.253957 
 127.210444 35.782444 172.983814 
 127.210667 35.782444 182.811118 
 127.210778 35.782444 189.915955 
 127.210889 35.782444 194.121436 
 127.211000 35.782444 201.022669 
 127.209889 35.782556 158.375532 
 127.210000 35.782556 157.884789 
 127.210111 35.782556 161.615335 
 127.210222 35.782556 168.961760 
 127.210444 35.782556 173.296824 
 127.210667 35.782556 185.249088 
 127.210778 35.782556 192.053096 
 127.210889 35.782556 196.736075 
 127.211000 35.782556 205.407662 
 127.210000 35.782556 157.884789 
 127.210111 35.782556 161.615335 
 127.210222 35.782556 168.961760 
 127.210333 35.782556 172.543428 
 127.210556 35.782556 175.684753 
 127.210778 35.782556 192.053096 
 127.210889 35.782556 196.736075 
 127.211000 35.782556 205.407662 
 127.211111 35.782556 213.414096 
 127.210000 35.782667 158.399989 
 127.210111 35.782667 163.891234 
 127.210222 35.782667 171.491416 
 127.210333 35.782667 174.161185 
 127.210556 35.782667 177.578780 
 127.210778 35.782667 194.688284 
 127.210889 35.782667 200.574151 
 127.211000 35.782667 209.624434 
 127.211111 35.782667 215.164477 
 127.210000 35.782778 159.799321 
 127.210111 35.782778 167.633265 
 127.210222 35.782778 174.801979 
 127.210333 35.782778 176.506490 
 127.210556 35.782778 181.628123 
 127.210778 35.782778 198.646821 
 127.210889 35.782778 205.269046 
 127.211000 35.782778 212.820992 
 127.211111 35.782778 216.402516 
 127.210000 35.782889 162.736989 
 127.210111 35.782889 172.694825 
 127.210222 35.782889 178.358102 
 127.210333 35.782889 179.263273 
 127.210556 35.782889 187.303221 
 127.210778 35.782889 203.322265 
 127.210889 35.782889 209.406077 
 127.211000 35.782889 214.848040 
 127.211111 35.782889 217.559050 
 127.210111 35.782889 172.694825 
 127.210222 35.782889 178.358102 
 127.210333 35.782889 179.263273 
 127.210444 35.782889 180.121034 
 127.210667 35.782889 199.059581 
 127.210889 35.782889 209.406077 
 127.211000 35.782889 214.848040 
 127.211111 35.782889 217.559050 
 127.211222 35.782889 220.821949 
 127.210111 35.783000 177.822041 
 127.210222 35.783000 181.375915 
 127.210333 35.783000 181.853180 
 127.210444 35.783000 183.592001 
 127.210667 35.783000 203.047696 
 127.210889 35.783000 211.773589 
 127.211000 35.783000 216.121804 
 127.211111 35.783000 219.010953 
 127.211222 35.783000 222.905692 
 127.210111 35.783111 181.608139 
 127.210222 35.783111 183.436668 
 127.210333 35.783111 183.841597 
 127.210444 35.783111 186.727580 
 127.210667 35.783111 205.203469 
 127.210889 35.783111 212.354581 
 127.211000 35.783111 217.148539 
 127.211111 35.783111 220.907831 
 127.211222 35.783111 224.810211 
 127.210222 35.783111 183.436668 
 127.210333 35.783111 183.841597 
 127.210444 35.783111 186.727580 
 127.210556 35.783111 197.454488 
 127.210778 35.783111 207.591199 
 127.211000 35.783111 217.148539 
 127.211111 35.783111 220.907831 
 127.211222 35.783111 224.810211 
 127.211333 35.783111 227.914961 
 127.210222 35.783222 184.661304 
 127.210333 35.783222 185.212953 
 127.210444 35.783222 189.428680 
 127.210556 35.783222 200.863866 
 127.210778 35.783222 207.901905 
 127.211000 35.783222 218.312091 
 127.211111 35.783222 223.018325 
 127.211222 35.783222 226.253978 
 127.211333 35.783222 229.311569 
 127.210222 35.783333 185.343455 
 127.210333 35.783333 186.198828 
 127.210444 35.783333 192.165918 
 127.210556 35.783333 204.154068 
 127.210778 35.783333 208.428662 
 127.211000 35.783333 219.748817 
 127.211111 35.783333 224.868380 
 127.211222 35.783333 227.290923 
 127.211333 35.783333 231.018045 
 127.210333 35.783333 186.198828 
 127.210444 35.783333 192.165918 
 127.210556 35.783333 204.154068 
 127.210667 35.783333 208.197696 
 127.210889 35.783333 211.342428 
 127.211111 35.783333 224.868380 
 127.211222 35.783333 227.290923 
 127.211333 35.783333 231.018045 
 127.211444 35.783333 239.478657 
 127.210333 35.783444 187.153933 
 127.210444 35.783444 195.917376 
 127.210556 35.783444 208.400121 
 127.210667 35.783444 210.853723 
 127.210889 35.783444 211.545775 
 127.211111 35.783444 226.267525 
 127.211222 35.783444 228.181055 
 127.211333 35.783444 233.157009 
 127.211444 35.783444 241.844476 
 127.210333 35.783556 188.592030 
 127.210444 35.783556 201.802556 
 127.210556 35.783556 213.949102 
 127.210667 35.783556 214.960310 
 127.210889 35.783556 213.871423 
 127.211111 35.783556 227.541147 
 127.211222 35.783556 229.229739 
 127.211333 35.783556 235.572800 
 127.211444 35.783556 243.388051 
 127.210444 35.783556 201.802556 
 127.210556 35.783556 213.949102 
 127.210667 35.783556 214.960310 
 127.210778 35.783556 213.012943 
 127.211000 35.783556 223.911576 
 127.211222 35.783556 229.229739 
 127.211333 35.783556 235.572800 
 127.211444 35.783556 243.388051 
 127.211556 35.783556 245.972857 
 127.210444 35.783667 209.791878 
 127.210556 35.783667 219.731963 
 127.210667 35.783667 219.909868 
 127.210778 35.783667 218.223450 
 127.211000 35.783667 228.531758 
 127.211222 35.783667 230.765661 
 127.211333 35.783667 237.751284 
 127.211444 35.783667 243.875572 
 127.211556 35.783667 245.379928 
 127.210444 35.783778 217.760292 
 127.210556 35.783778 224.316409 
 127.210667 35.783778 224.528196 
 127.210778 35.783778 225.003026 
 127.211000 35.783778 235.315135 
 127.211222 35.783778 233.037834 
 127.211333 35.783778 238.751567 
 127.211444 35.783778 242.769881 
 127.211556 35.783778 243.298091 
 127.210556 35.783778 224.316409 
 127.210667 35.783778 224.528196 
 127.210778 35.783778 225.003026 
 127.210889 35.783778 230.299320 
 127.211111 35.783778 233.366015 
 127.211333 35.783778 238.751567 
 127.211444 35.783778 242.769881 
 127.211556 35.783778 243.298091 
 127.211667 35.783778 238.882147 
 127.210556 35.783889 227.312640 
 127.210667 35.783889 228.258595 
 127.210778 35.783889 231.884587 
 127.210889 35.783889 238.610279 
 127.211111 35.783889 237.919938 
 127.211333 35.783889 237.184578 
 127.211444 35.783889 238.958626 
 127.211556 35.783889 238.210126 
 127.211667 35.783889 227.257409 
 127.210556 35.784000 229.217477 
 127.210667 35.784000 231.431042 
 127.210778 35.784000 237.572931 
 127.210889 35.784000 242.879108 
 127.211111 35.784000 240.710281 
 127.211333 35.784000 232.201073 
 127.211444 35.784000 231.541287 
 127.211556 35.784000 229.083646 
 127.211667 35.784000 213.347939 
 127.210556 35.784111 230.647060 
 127.210667 35.784111 234.550270 
 127.210778 35.784111 241.528014 
 127.210889 35.784111 244.621465 
 127.211111 35.784111 241.606913 
 127.211333 35.784111 225.591635 
 127.211444 35.784111 222.363195 
 127.211556 35.784111 218.640022 
 127.211667 35.784111 204.309206 
 127.210667 35.784111 234.550270 
 127.210778 35.784111 241.528014 
 127.210889 35.784111 244.621465 
 127.211000 35.784111 243.347146 
 127.211222 35.784111 237.079534 
 127.211444 35.784111 222.363195 
 127.211556 35.784111 218.640022 
 127.211667 35.784111 204.309206 
 127.211778 35.784111 196.828373 
 127.210667 35.784222 237.794138 
 127.210778 35.784222 243.939668 
 127.210889 35.784222 245.231535 
 127.211000 35.784222 243.210020 
 127.211222 35.784222 236.197025 
 127.211444 35.784222 215.192972 
 127.211556 35.784222 211.180710 
 127.211667 35.784222 200.258330 
 127.211778 35.784222 195.780734 
 127.210667 35.784333 240.842871 
 127.210778 35.784333 245.253509 
 127.210889 35.784333 245.209717 
 127.211000 35.784333 242.136078 
 127.211222 35.784333 234.491283 
 127.211444 35.784333 211.229233 
 127.211556 35.784333 207.293601 
 127.211667 35.784333 198.546396 
 127.211778 35.784333 194.770487 
 127.210778 35.784333 245.253509 
 127.210889 35.784333 245.209717 
 127.211000 35.784333 242.136078 
 127.211111 35.784333 239.780928 
 127.211333 35.784333 217.117591 
 127.211556 35.784333 207.293601 
 127.211667 35.784333 198.546396 
 127.211778 35.784333 194.770487 
 127.211889 35.784333 188.163098 
 127.210778 35.784444 245.855842 
 127.210889 35.784444 244.421490 
 127.211000 35.784444 239.149112 
 127.211111 35.784444 235.769730 
 127.211333 35.784444 214.868377 
 127.211556 35.784444 205.108268 
 127.211667 35.784444 197.356029 
 127.211778 35.784444 192.841930 
 127.211889 35.784444 182.672796 
 127.210778 35.784556 245.906525 
 127.210889 35.784556 242.040997 
 127.211000 35.784556 232.980375 
 127.211111 35.784556 228.515942 
 127.211333 35.784556 211.769905 
 127.211556 35.784556 202.647502 
 127.211667 35.784556 195.481573 
 127.211778 35.784556 189.539002 
 127.211889 35.784556 178.609016 
 127.210889 35.784556 242.040997 
 127.211000 35.784556 232.980375 
 127.211111 35.784556 228.515942 
 127.211222 35.784556 224.623126 
 127.211444 35.784556 207.203800 
 127.211667 35.784556 195.481573 
 127.211778 35.784556 189.539002 
 127.211889 35.784556 178.609016 
 127.212000 35.784556 174.700208 
 127.210889 35.784667 236.674989 
 127.211000 35.784667 224.463126 
 127.211111 35.784667 220.000038 
 127.211222 35.784667 215.572447 
 127.211444 35.784667 203.425884 
 127.211667 35.784667 192.709079 
 127.211778 35.784667 186.280884 
 127.211889 35.784667 176.770993 
 127.212000 35.784667 174.231158 
 127.210889 35.784778 228.136616 
 127.211000 35.784778 216.972704 
 127.211111 35.784778 213.207380 
 127.211222 35.784778 206.438750 
 127.211444 35.784778 196.166915 
 127.211667 35.784778 190.394902 
 127.211778 35.784778 184.881538 
 127.211889 35.784778 176.281866 
 127.212000 35.784778 173.412148 
 127.211000 35.784778 216.972704 
 127.211111 35.784778 213.207380 
 127.211222 35.784778 206.438750 
 127.211333 35.784778 195.213479 
 127.211556 35.784778 193.885554 
 127.211778 35.784778 184.881538 
 127.211889 35.784778 176.281866 
 127.212000 35.784778 173.412148 
 127.212111 35.784778 165.155120 
 127.211000 35.784889 212.236841 
 127.211111 35.784889 208.492156 
 127.211222 35.784889 198.617988 
 127.211333 35.784889 186.152475 
 127.211556 35.784889 190.081905 
 127.211778 35.784889 184.679413 
 127.211889 35.784889 176.021622 
 127.212000 35.784889 171.280932 
 127.212111 35.784889 163.530348 
 127.211000 35.785000 209.339609 
 127.211111 35.785000 204.413130 
 127.211222 35.785000 191.831722 
 127.211333 35.785000 180.984752 
 127.211556 35.785000 186.994883 
 127.211778 35.785000 183.310237 
 127.211889 35.785000 173.896385 
 127.212000 35.785000 167.752121 
 127.212111 35.785000 163.078308 
 127.211111 35.785000 204.413130 
 127.211222 35.785000 191.831722 
 127.211333 35.785000 180.984752 
 127.211444 35.785000 181.414074 
 127.211667 35.785000 188.036564 
 127.211889 35.785000 173.896385 
 127.212000 35.785000 167.752121 
 127.212111 35.785000 163.078308 
 127.212222 35.785000 162.064996 
 127.211111 35.785111 199.603852 
 127.211222 35.785111 186.081045 
 127.211333 35.785111 178.392041 
 127.211444 35.785111 177.294731 
 127.211667 35.785111 185.671900 
 127.211889 35.785111 168.440608 
 127.212000 35.785111 164.875272 
 127.212111 35.785111 163.001546 
 127.212222 35.785111 160.234465 
 127.211111 35.785222 193.552490 
 127.211222 35.785222 181.792519 
 127.211333 35.785222 176.806125 
 127.211444 35.785222 173.207329 
 127.211667 35.785222 180.033943 
 127.211889 35.785222 163.573021 
 127.212000 35.785222 163.133687 
 127.212111 35.785222 162.297478 
 127.212222 35.785222 155.933628 
 127.211111 35.785333 187.137128 
 127.211222 35.785333 179.050213 
 127.211333 35.785333 175.290483 
 127.211444 35.785333 168.207946 
 127.211667 35.785333 170.551158 
 127.211889 35.785333 160.897786 
 127.212000 35.785333 160.797256 
 127.212111 35.785333 159.249146 
 127.212222 35.785333 152.918014 
 127.211222 35.785333 179.050213 
 127.211333 35.785333 175.290483 
 127.211444 35.785333 168.207946 
 127.211556 35.785333 164.217407 
 127.211778 35.785333 164.953683 
 127.212000 35.785333 160.797256 
 127.212111 35.785333 159.249146 
 127.212222 35.785333 152.918014 
 127.212333 35.785333 150.764347 
 127.211222 35.785444 177.453568 
 127.211333 35.785444 173.281477 
 127.211444 35.785444 162.904870 
 127.211556 35.785444 156.784581 
 127.211778 35.785444 161.301839 
 127.212000 35.785444 155.443901 
 127.212111 35.785444 152.036919 
 127.212222 35.785444 149.545243 
 127.212333 35.785444 145.603020 
 127.211222 35.785556 176.433967 
 127.211333 35.785556 170.515242 
 127.211444 35.785556 158.397700 
 127.211556 35.785556 153.051240 
 127.211778 35.785556 158.092537 
 127.212000 35.785556 146.441737 
 127.212111 35.785556 142.125688 
 127.212222 35.785556 142.694745 
 127.212333 35.785556 137.366574 
 127.211333 35.785556 170.515242 
 127.211444 35.785556 158.397700 
 127.211556 35.785556 153.051240 
 127.211667 35.785556 155.015087 
 127.211889 35.785556 155.484520 
 127.212111 35.785556 142.125688 
 127.212222 35.785556 142.694745 
 127.212333 35.785556 137.366574 
 127.212444 35.785556 130.466179 
 127.211333 35.785667 167.131376 
 127.211444 35.785667 154.874121 
 127.211556 35.785667 150.906463 
 127.211667 35.785667 151.093809 
 127.211889 35.785667 148.630160 
 127.212111 35.785667 136.066319 
 127.212222 35.785667 135.511618 
 127.212333 35.785667 132.493111 
 127.212444 35.785667 130.184615 
 127.211333 35.785778 163.409449 
 127.211444 35.785778 151.013980 
 127.211556 35.785778 147.855591 
 127.211667 35.785778 146.309893 
 127.211889 35.785778 140.266327 
 127.212111 35.785778 134.352873 
 127.212222 35.785778 133.185842 
 127.212333 35.785778 131.913400 
 127.212444 35.785778 130.743765 
 127.211444 35.785778 151.013980 
 127.211556 35.785778 147.855591 
 127.211667 35.785778 146.309893 
 127.211778 35.785778 141.623093 
 127.212000 35.785778 135.534678 
 127.212222 35.785778 133.185842 
 127.212333 35.785778 131.913400 
 127.212444 35.785778 130.743765 
 127.212556 35.785778 132.653505 
 127.211444 35.785889 145.995544 
 127.211556 35.785889 143.424715 
 127.211667 35.785889 140.280516 
 127.211778 35.785889 136.390279 
 127.212000 35.785889 134.575985 
 127.212222 35.785889 135.018484 
 127.212333 35.785889 133.769645 
 127.212444 35.785889 132.412418 
 127.212556 35.785889 135.776137 
 127.211444 35.786000 142.122248 
 127.211556 35.786000 140.262615 
 127.211667 35.786000 136.614599 
 127.211778 35.786000 135.005436 
 127.212000 35.786000 135.298139 
 127.212222 35.786000 139.002113 
 127.212333 35.786000 136.140392 
 127.212444 35.786000 135.998662 
 127.212556 35.786000 140.325407 
 127.211556 35.786000 140.262615 
 127.211667 35.786000 136.614599 
 127.211778 35.786000 135.005436 
 127.211889 35.786000 135.128594 
 127.212111 35.786000 138.046265 
 127.212333 35.786000 136.140392 
 127.212444 35.786000 135.998662 
 127.212556 35.786000 140.325407 
 127.212667 35.786000 145.733154 
 127.211556 35.786111 138.689370 
 127.211667 35.786111 135.335126 
 127.211778 35.786111 134.921143 
 127.211889 35.786111 136.049785 
 127.212111 35.786111 145.213666 
 127.212333 35.786111 139.032686 
 127.212444 35.786111 140.710746 
 127.212556 35.786111 143.958359 
 127.212667 35.786111 148.077922 
 127.211556 35.786222 137.774229 
 127.211667 35.786222 135.791194 
 127.211778 35.786222 136.865160 
 127.211889 35.786222 140.008375 
 127.212111 35.786222 150.616639 
 127.212333 35.786222 144.107523 
 127.212444 35.786222 144.033883 
 127.212556 35.786222 146.172421 
 127.212667 35.786222 151.029605 
 127.211667 35.786222 135.791194 
 127.211778 35.786222 136.865160 
 127.211889 35.786222 140.008375 
 127.212000 35.786222 146.498147 
 127.212222 35.786222 149.665537 
 127.212444 35.786222 144.033883 
 127.212556 35.786222 146.172421 
 127.212667 35.786222 151.029605 
 127.212778 35.786222 157.730775 
 127.211667 35.786333 140.271493 
 127.211778 35.786333 144.174629 
 127.211889 35.786333 146.245252 
 127.212000 35.786333 149.401949 
 127.212222 35.786333 152.735213 
 127.212444 35.786333 146.230332 
 127.212556 35.786333 148.454920 
 127.212667 35.786333 154.485685 
 127.212778 35.786333 160.295538 
 127.211667 35.786444 148.076788 
 127.211778 35.786444 151.563229 
 127.211889 35.786444 153.090301 
 127.212000 35.786444 152.040250 
 127.212222 35.786444 155.020459 
 127.212444 35.786444 149.685005 
 127.212556 35.786444 151.658066 
 127.212667 35.786444 157.714937 
 127.212778 35.786444 162.323388 
 127.211667 35.786556 151.992796 
 127.211778 35.786556 156.177950 
 127.211889 35.786556 164.115564 
 127.212000 35.786556 159.046898 
 127.212222 35.786556 160.247493 
 127.212444 35.786556 157.709531 
 127.212556 35.786556 155.770290 
 127.212667 35.786556 160.264161 
 127.212778 35.786556 164.233721 
 127.211778 35.786556 156.177950 
 127.211889 35.786556 164.115564 
 127.212000 35.786556 159.046898 
 127.212111 35.786556 163.408242 
 127.212333 35.786556 165.782685 
 127.212556 35.786556 155.770290 
 127.212667 35.786556 160.264161 
 127.212778 35.786556 164.233721 
 127.212889 35.786556 169.255919 
 127.211778 35.786667 162.835954 
 127.211889 35.786667 173.954115 
 127.212000 35.786667 169.044146 
 127.212111 35.786667 171.271984 
 127.212333 35.786667 177.727015 
 127.212556 35.786667 160.804626 
 127.212667 35.786667 162.447994 
 127.212778 35.786667 166.334073 
 127.212889 35.786667 171.128401 
 127.211778 35.786778 171.294539 
 127.211889 35.786778 177.847341 
 127.212000 35.786778 175.803291 
 127.212111 35.786778 177.145992 
 127.212333 35.786778 184.294415 
 127.212556 35.786778 168.639204 
 127.212667 35.786778 165.378830 
 127.212778 35.786778 168.700882 
 127.212889 35.786778 172.997917 
 127.211889 35.786778 177.847341 
 127.212000 35.786778 175.803291 
 127.212111 35.786778 177.145992 
 127.212222 35.786778 180.875164 
 127.212444 35.786778 182.038720 
 127.212667 35.786778 165.378830 
 127.212778 35.786778 168.700882 
 127.212889 35.786778 172.997917 
 127.213000 35.786778 178.576900 
 127.211889 35.786889 179.669873 
 127.212000 35.786889 183.907574 
 127.212111 35.786889 185.572291 
 127.212222 35.786889 186.205329 
 127.212444 35.786889 188.297328 
 127.212667 35.786889 170.982000 
 127.212778 35.786889 171.363719 
 127.212889 35.786889 175.262259 
 127.213000 35.786889 181.816369 
 127.211889 35.787000 184.218099 
 127.212000 35.787000 196.983243 
 127.212111 35.787000 196.394501 
 127.212222 35.787000 189.395958 
 127.212444 35.787000 192.718607 
 127.212667 35.787000 180.596394 
 127.212778 35.787000 174.661812 
 127.212889 35.787000 178.373122 
 127.213000 35.787000 185.430224 
 127.212000 35.787000 196.983243 
 127.212111 35.787000 196.394501 
 127.212222 35.787000 189.395958 
 127.212333 35.787000 188.312091 
 127.212556 35.787000 194.068085 
 127.212778 35.787000 174.661812 
 127.212889 35.787000 178.373122 
 127.213000 35.787000 185.430224 
 127.213111 35.787000 190.418712 
 127.212000 35.787111 205.389823 
 127.212111 35.787111 202.827300 
 127.212222 35.787111 192.715650 
 127.212333 35.787111 191.787658 
 127.212556 35.787111 200.795060 
 127.212778 35.787111 179.220308 
 127.212889 35.787111 182.468189 
 127.213000 35.787111 188.644580 
 127.213111 35.787111 190.573348 
 127.212000 35.787222 207.669253 
 127.212111 35.787222 205.352470 
 127.212222 35.787222 198.321892 
 127.212333 35.787222 199.591383 
 127.212556 35.787222 203.865186 
 127.212778 35.787222 185.183875 
 127.212889 35.787222 186.870463 
 127.213000 35.787222 190.738943 
 127.213111 35.787222 189.820853 
 127.212111 35.787222 205.352470 
 127.212222 35.787222 198.321892 
 127.212333 35.787222 199.591383 
 127.212444 35.787222 203.079261 
 127.212667 35.787222 198.730375 
 127.212889 35.787222 186.870463 
 127.213000 35.787222 190.738943 
 127.213111 35.787222 189.820853 
 127.213222 35.787222 184.977364 
 127.212111 35.787333 207.532817 
 127.212222 35.787333 209.349475 
 127.212333 35.787333 212.821272 
 127.212444 35.787333 209.952716 
 127.212667 35.787333 203.184544 
 127.212889 35.787333 190.487729 
 127.213000 35.787333 191.577653 
 127.213111 35.787333 188.450912 
 127.213222 35.787333 183.547443 
 127.212111 35.787444 213.137579 
 127.212222 35.787444 224.680295 
 127.212333 35.787444 226.675770 
 127.212444 35.787444 217.668108 
 127.212667 35.787444 207.100987 
 127.212889 35.787444 192.954108 
 127.213000 35.787444 191.470927 
 127.213111 35.787444 186.834297 
 127.213222 35.787444 182.481041 
 127.212222 35.787444 224.680295 
 127.212333 35.787444 226.675770 
 127.212444 35.787444 217.668108 
 127.212556 35.787444 208.989991 
 127.212778 35.787444 198.177220 
 127.213000 35.787444 191.470927 
 127.213111 35.787444 186.834297 
 127.213222 35.787444 182.481041 
 127.213333 35.787444 180.877048 
 127.212222 35.787556 236.171060 
 127.212333 35.787556 235.728251 
 127.212444 35.787556 225.271994 
 127.212556 35.787556 213.765675 
 127.212778 35.787556 205.804082 
 127.213000 35.787556 190.936018 
 127.213111 35.787556 185.343001 
 127.213222 35.787556 181.746457 
 127.213333 35.787556 180.620710 
 127.212222 35.787667 241.294437 
 127.212333 35.787667 240.079548 
 127.212444 35.787667 231.452810 
 127.212556 35.787667 220.708050 
 127.212778 35.787667 214.710791 
 127.213000 35.787667 190.804154 
 127.213111 35.787667 184.357581 
 127.213222 35.787667 181.284222 
 127.213333 35.787667 180.392663 
 127.212222 35.787778 243.066959 
 127.212333 35.787778 241.824042 
 127.212444 35.787778 235.334564 
 127.212556 35.787778 227.661106 
 127.212778 35.787778 221.205827 
 127.213000 35.787778 192.402431 
 127.213111 35.787778 184.340098 
 127.213222 35.787778 181.057142 
 127.213333 35.787778 180.174694 
 127.212333 35.787778 241.824042 
 127.212444 35.787778 235.334564 
 127.212556 35.787778 227.661106 
 127.212667 35.787778 227.571982 
 127.212889 35.787778 203.663673 
 127.213111 35.787778 184.340098 
 127.213222 35.787778 181.057142 
 127.213333 35.787778 180.174694 
 127.213444 35.787778 179.994359 
 127.212333 35.787889 242.188243 
 127.212444 35.787889 236.761072 
 127.212556 35.787889 231.746092 
 127.212667 35.787889 230.631367 
 127.212889 35.787889 207.500045 
 127.213111 35.787889 185.908666 
 127.213222 35.787889 181.085449 
 127.213333 35.787889 180.009610 
 127.213444 35.787889 180.002826 
 127.212333 35.788000 241.546346 
 127.212444 35.788000 236.374395 
 127.212556 35.788000 233.147957 
 127.212667 35.788000 231.309698 
 127.212889 35.788000 208.589482 
 127.213111 35.788000 189.311224 
 127.213222 35.788000 181.425340 
 127.213333 35.788000 179.952365 
 127.213444 35.788000 180.142363 
 127.212444 35.788000 236.374395 
 127.212556 35.788000 233.147957 
 127.212667 35.788000 231.309698 
 127.212778 35.788000 222.693413 
 127.213000 35.788000 200.248281 
 127.213222 35.788000 181.425340 
 127.213333 35.788000 179.952365 
 127.213444 35.788000 180.142363 
 127.213556 35.788000 181.385711 
 127.212444 35.788111 235.311281 
 127.212556 35.788111 233.390032 
 127.212667 35.788111 231.032360 
 127.212778 35.788111 221.135202 
 127.213000 35.788111 202.669137 
 127.213222 35.788111 182.163745 
 127.213333 35.788111 180.047548 
 127.213444 35.788111 180.419602 
 127.213556 35.788111 181.724671 
 127.212444 35.788222 234.438550 
 127.212556 35.788222 233.308297 
 127.212667 35.788222 230.402150 
 127.212778 35.788222 219.498498 
 127.213000 35.788222 204.010134 
 127.213222 35.788222 183.538138 
 127.213333 35.788222 180.416707 
 127.213444 35.788222 180.858458 
 127.213556 35.788222 182.028354 
 127.212556 35.788222 233.308297 
 127.212667 35.788222 230.402150 
 127.212778 35.788222 219.498498 
 127.212889 35.788222 208.231490 
 127.213111 35.788222 197.265733 
 127.213333 35.788222 180.416707 
 127.213444 35.788222 180.858458 
 127.213556 35.788222 182.028354 
 127.213667 35.788222 182.618157 
 127.212556 35.788333 233.155044 
 127.212667 35.788333 229.626859 
 127.212778 35.788333 218.437017 
 127.212889 35.788333 209.022059 
 127.213111 35.788333 200.001514 
 127.213333 35.788333 181.457371 
 127.213444 35.788333 181.512479 
 127.213556 35.788333 182.333219 
 127.213667 35.788333 183.122421 
 127.212556 35.788444 232.973977 
 127.212667 35.788444 228.861894 
 127.212778 35.788444 218.782935 
 127.212889 35.788444 211.592372 
 127.213111 35.788444 201.995920 
 127.213333 35.788444 184.031479 
 127.213444 35.788444 182.511079 
 127.213556 35.788444 182.788081 
 127.213667 35.788444 184.420012 
 127.212667 35.788444 228.861894 
 127.212778 35.788444 218.782935 
 127.212889 35.788444 211.592372 
 127.213000 35.788444 207.634070 
 127.213222 35.788444 190.380279 
 127.213444 35.788444 182.511079 
 127.213556 35.788444 182.788081 
 127.213667 35.788444 184.420012 
 127.213778 35.788444 190.520919 
 127.212667 35.788556 228.387225 
 127.212778 35.788556 221.117735 
 127.212889 35.788556 216.186975 
 127.213000 35.788556 211.344462 
 127.213222 35.788556 194.581813 
 127.213444 35.788556 184.211483 
 127.213556 35.788556 183.819270 
 127.213667 35.788556 187.466972 
 127.213778 35.788556 197.254876 
 127.212667 35.788667 228.569961 
 127.212778 35.788667 224.623444 
 127.212889 35.788667 221.491379 
 127.213000 35.788667 215.765260 
 127.213222 35.788667 196.671527 
 127.213444 35.788667 187.328498 
 127.213556 35.788667 186.509858 
 127.213667 35.788667 193.180826 
 127.213778 35.788667 203.524474 
 127.212778 35.788778 227.638882 
 127.212889 35.788778 225.644201 
 127.213000 35.788778 219.218733 
 127.213111 35.788778 203.795757 
 127.213333 35.788778 195.831440 
 127.213556 35.788778 192.891078 
 127.213667 35.788778 200.754427 
 127.213778 35.788778 207.607010 
 127.213889 35.788778 211.178708 
 127.212778 35.788889 229.505532 
 127.212889 35.788889 228.023798 
 127.213000 35.788889 220.539092 
 127.213111 35.788889 203.588409 
 127.213333 35.788889 197.558930 
 127.213556 35.788889 203.840532 
 127.213667 35.788889 207.809720 
 127.213778 35.788889 210.102690 
 127.213889 35.788889 213.916428 
 127.212778 35.789000 230.464891 
 127.212889 35.789000 228.837582 
 127.213000 35.789000 219.278730 
 127.213111 35.789000 203.866154 
 127.213333 35.789000 199.365599 
 127.213556 35.789000 214.897550 
 127.213667 35.789000 213.300545 
 127.213778 35.789000 212.236897 
 127.213889 35.789000 218.401426 
 127.212889 35.789000 228.837582 
 127.213000 35.789000 219.278730 
 127.213111 35.789000 203.866154 
 127.213222 35.789000 198.305193 
 127.213444 35.789000 207.839479 
 127.213667 35.789000 213.300545 
 127.213778 35.789000 212.236897 
 127.213889 35.789000 218.401426 
 127.214000 35.789000 236.138578 
 127.212889 35.789111 228.130432 
 127.213000 35.789111 215.963496 
 127.213111 35.789111 204.944130 
 127.213222 35.789111 199.901559 
 127.213444 35.789111 214.419933 
 127.213667 35.789111 217.816492 
 127.213778 35.789111 215.102062 
 127.213889 35.789111 225.157399 
 127.214000 35.789111 241.807816 
 127.212889 35.789222 225.673972 
 127.213000 35.789222 212.672144 
 127.213111 35.789222 206.343171 
 127.213222 35.789222 202.822896 
 127.213444 35.789222 218.850818 
 127.213667 35.789222 221.745013 
 127.213778 35.789222 219.526429 
 127.213889 35.789222 233.087690 
 127.214000 35.789222 245.204696 
 127.213000 35.789222 212.672144 
 127.213111 35.789222 206.343171 
 127.213222 35.789222 202.822896 
 127.213333 35.789222 206.506451 
 127.213556 35.789222 224.896448 
 127.213778 35.789222 219.526429 
 127.213889 35.789222 233.087690 
 127.214000 35.789222 245.204696 
 127.214111 35.789222 248.023359 
 127.213000 35.789333 210.709954 
 127.213111 35.789333 207.542533 
 127.213222 35.789333 206.602716 
 127.213333 35.789333 210.969503 
 127.213556 35.789333 226.263160 
 127.213778 35.789333 225.794023 
 127.213889 35.789333 240.322623 
 127.214000 35.789333 247.285637 
 127.214111 35.789333 248.875505 
 127.213000 35.789445 209.817571 
 127.213111 35.789445 208.558262 
 127.213222 35.789445 210.048940 
 127.213333 35.789445 213.853145 
 127.213556 35.789445 226.817381 
 127.213778 35.789445 233.465380 
 127.213889 35.789445 246.319668 
 127.214000 35.789445 249.121085 
 127.214111 35.789445 250.086870 
 127.213111 35.789445 208.558262 
 127.213222 35.789445 210.048940 
 127.213333 35.789445 213.853145 
 127.213444 35.789445 221.701591 
 127.213667 35.789445 227.487563 
 127.213889 35.789445 246.319668 
 127.214000 35.789445 249.121085 
 127.214111 35.789445 250.086870 
 127.214222 35.789445 252.448478 
 127.213111 35.789556 209.673292 
 127.213222 35.789556 212.411402 
 127.213333 35.789556 215.241821 
 127.213444 35.789556 221.675309 
 127.213667 35.789556 230.007681 
 127.213889 35.789556 251.937903 
 127.214000 35.789556 251.631043 
 127.214111 35.789556 251.733025 
 127.214222 35.789556 253.021269 
 127.213111 35.789667 211.099979 
 127.213222 35.789667 213.810862 
 127.213333 35.789667 216.253904 
 127.213444 35.789667 222.096503 
 127.213667 35.789667 233.673406 
 127.213889 35.789667 257.309699 
 127.214000 35.789667 255.107111 
 127.214111 35.789667 253.376338 
 127.214222 35.789667 253.060173 
 127.213222 35.789667 213.810862 
 127.213333 35.789667 216.253904 
 127.213444 35.789667 222.096503 
 127.213556 35.789667 227.649852 
 127.213778 35.789667 250.389009 
 127.214000 35.789667 255.107111 
 127.214111 35.789667 253.376338 
 127.214222 35.789667 253.060173 
 127.214333 35.789667 252.535709 
 127.213222 35.789778 214.807781 
 127.213333 35.789778 217.935082 
 127.213444 35.789778 223.806522 
 127.213556 35.789778 229.104248 
 127.213778 35.789778 256.814213 
 127.214000 35.789778 258.461042 
 127.214111 35.789778 254.337555 
 127.214222 35.789778 252.482188 
 127.214333 35.789778 251.265511 
 127.213222 35.789889 216.089541 
 127.213333 35.789889 220.820464 
 127.213444 35.789889 226.337483 
 127.213556 35.789889 231.734009 
 127.213778 35.789889 260.332227 
 127.214000 35.789889 260.452388 
 127.214111 35.789889 254.274699 
 127.214222 35.789889 251.065500 
 127.214333 35.789889 248.960647 
 127.213222 35.790000 218.274347 
 127.213333 35.790000 224.191602 
 127.213444 35.790000 228.517757 
 127.213556 35.790000 235.039068 
 127.213778 35.790000 261.316725 
 127.214000 35.790000 261.008951 
 127.214111 35.790000 253.025297 
 127.214222 35.790000 248.464885 
 127.214333 35.790000 245.324369 
 127.213333 35.790000 224.191602 
 127.213444 35.790000 228.517757 
 127.213556 35.790000 235.039068 
 127.213667 35.790000 250.669626 
 127.213889 35.790000 263.585184 
 127.214111 35.790000 253.025297 
 127.214222 35.790000 248.464885 
 127.214333 35.790000 245.324369 
 127.214444 35.790000 239.456687 
 127.213333 35.790111 226.822353 
 127.213444 35.790111 230.270553 
 127.213556 35.790111 238.873250 
 127.213667 35.790111 252.808056 
 127.213889 35.790111 263.110769 
 127.214111 35.790111 250.341102 
 127.214222 35.790111 244.559519 
 127.214333 35.790111 240.674944 
 127.214444 35.790111 232.993887 
 127.213333 35.790222 228.491533 
 127.213444 35.790222 232.240532 
 127.213556 35.790222 243.167655 
 127.213667 35.790222 253.638137 
 127.213889 35.790222 261.258965 
 127.214111 35.790222 246.245405 
 127.214222 35.790222 240.071356 
 127.214333 35.790222 236.136329 
 127.214444 35.790222 227.088226 
 127.213444 35.790222 232.240532 
 127.213556 35.790222 243.167655 
 127.213667 35.790222 253.638137 
 127.213778 35.790222 258.348637 
 127.214000 35.790222 258.278984 
 127.214222 35.790222 240.071356 
 127.214333 35.790222 236.136329 
 127.214444 35.790222 227.088226 
 127.214556 35.790222 213.712835 
 127.213444 35.790333 235.149198 
 127.213556 35.790333 247.324308 
 127.213667 35.790333 253.871731 
 127.213778 35.790333 255.638343 
 127.214000 35.790333 254.174176 
 127.214222 35.790333 236.259717 
 127.214333 35.790333 232.621773 
 127.214444 35.790333 222.441861 
 127.214556 35.790333 210.952085 
 127.213444 35.790445 239.401180 
 127.213556 35.790445 250.517684 
 127.213667 35.790445 253.660383 
 127.213778 35.790445 252.787377 
 127.214000 35.790445 248.880589 
 127.214222 35.790445 233.809117 
 127.214333 35.790445 230.222419 
 127.214444 35.790445 219.117921 
 127.214556 35.790445 209.530695 
 127.213556 35.790445 250.517684 
 127.213667 35.790445 253.660383 
 127.213778 35.790445 252.787377 
 127.213889 35.790445 251.819104 
 127.214111 35.790445 237.973034 
 127.214333 35.790445 230.222419 
 127.214444 35.790445 219.117921 
 127.214556 35.790445 209.530695 
 127.214667 35.790445 207.608699 
 127.213556 35.790556 252.388728 
 127.213667 35.790556 252.957662 
 127.213778 35.790556 250.086719 
 127.213889 35.790556 247.633425 
 127.214111 35.790556 236.082647 
 127.214333 35.790556 228.656698 
 127.214444 35.790556 217.086783 
 127.214556 35.790556 209.142150 
 127.214667 35.790556 208.752157 
 127.213556 35.790667 253.069662 
 127.213667 35.790667 251.663526 
 127.213778 35.790667 247.807309 
 127.213889 35.790667 245.419897 
 127.214111 35.790667 235.586580 
 127.214333 35.790667 227.859672 
 127.214444 35.790667 216.618139 
 127.214556 35.790667 209.967441 
 127.214667 35.790667 211.247394 
 127.213667 35.790667 251.663526 
 127.213778 35.790667 247.807309 
 127.213889 35.790667 245.419897 
 127.214000 35.790667 242.983501 
 127.214222 35.790667 232.013796 
 127.214444 35.790667 216.618139 
 127.214556 35.790667 209.967441 
 127.214667 35.790667 211.247394 
 127.214778 35.790667 219.099152 
 127.213667 35.790778 249.827373 
 127.213778 35.790778 246.135600 
 127.213889 35.790778 244.162978 
 127.214000 35.790778 241.422064 
 127.214222 35.790778 232.033469 
 127.214444 35.790778 218.486258 
 127.214556 35.790778 212.705203 
 127.214667 35.790778 215.249081 
 127.214778 35.790778 222.017797 
 127.213667 35.790889 247.821101 
 127.213778 35.790889 244.957028 
 127.213889 35.790889 242.914966 
 127.214000 35.790889 239.278240 
 127.214222 35.790889 232.588493 
 127.214444 35.790889 223.238157 
 127.214556 35.790889 217.983854 
 127.214667 35.790889 219.887735 
 127.214778 35.790889 224.091604 
 127.213778 35.790889 244.957028 
 127.213889 35.790889 242.914966 
 127.214000 35.790889 239.278240 
 127.214111 35.790889 234.561566 
 127.214333 35.790889 230.170580 
 127.214556 35.790889 217.983854 
 127.214667 35.790889 219.887735 
 127.214778 35.790889 224.091604 
 127.214889 35.790889 227.609539 
 127.213778 35.791000 243.938998 
 127.213889 35.791000 241.125182 
 127.214000 35.791000 236.680987 
 127.214111 35.791000 233.516815 
 127.214333 35.791000 232.992609 
 127.214556 35.791000 224.482876 
 127.214667 35.791000 223.758670 
 127.214778 35.791000 225.821499 
 127.214889 35.791000 230.199575 
 127.213778 35.791111 242.669930 
 127.213889 35.791111 238.683729 
 127.214000 35.791111 234.426148 
 127.214111 35.791111 233.235507 
 127.214333 35.791111 235.547761 
 127.214556 35.791111 229.492453 
 127.214667 35.791111 226.545855 
 127.214778 35.791111 227.915358 
 127.214889 35.791111 234.222528 
 127.213778 35.791222 240.828539 
 127.213889 35.791222 236.078936 
 127.214000 35.791222 233.106872 
 127.214111 35.791222 234.344524 
 127.214333 35.791222 238.276570 
 127.214556 35.791222 232.362961 
 127.214667 35.791222 228.924091 
 127.214778 35.791222 231.127485 
 127.214889 35.791222 239.955584 
 127.213889 35.791222 236.078936 
 127.214000 35.791222 233.106872 
 127.214111 35.791222 234.344524 
 127.214222 35.791222 240.266570 
 127.214444 35.791222 235.146271 
 127.214667 35.791222 228.924091 
 127.214778 35.791222 231.127485 
 127.214889 35.791222 239.955584 
 127.215000 35.791222 252.536685 
 127.213889 35.791333 234.015050 
 127.214000 35.791333 232.880828 
 127.214111 35.791333 237.458151 
 127.214222 35.791333 246.794842 
 127.214444 35.791333 236.865546 
 127.214667 35.791333 231.774468 
 127.214778 35.791333 236.136325 
 127.214889 35.791333 246.799003 
 127.215000 35.791333 256.833823 
 127.213889 35.791445 232.827337 
 127.214000 35.791445 233.909401 
 127.214111 35.791445 243.103052 
 127.214222 35.791445 254.394352 
 127.214444 35.791445 239.749007 
 127.214667 35.791445 235.998203 
 127.214778 35.791445 243.018618 
 127.214889 35.791445 253.212023 
 127.215000 35.791445 259.402041 
 127.214000 35.791445 233.909401 
 127.214111 35.791445 243.103052 
 127.214222 35.791445 254.394352 
 127.214333 35.791445 248.367743 
 127.214556 35.791445 236.741542 
 127.214778 35.791445 243.018618 
 127.214889 35.791445 253.212023 
 127.215000 35.791445 259.402041 
 127.215111 35.791445 259.661877 
 127.214000 35.791556 236.636818 
 127.214111 35.791556 250.648237 
 127.214222 35.791556 260.954620 
 127.214333 35.791556 255.675778 
 127.214556 35.791556 242.055541 
 127.214778 35.791556 250.512048 
 127.214889 35.791556 257.777441 
 127.215000 35.791556 260.424370 
 127.215111 35.791556 258.216434 
 127.214000 35.791667 241.585808 
 127.214111 35.791667 258.082733 
 127.214222 35.791667 265.637027 
 127.214333 35.791667 263.286148 
 127.214556 35.791667 253.879490 
 127.214778 35.791667 256.866190 
 127.214889 35.791667 260.291108 
 127.215000 35.791667 260.241951 
 127.215111 35.791667 255.822937 
 127.214111 35.791667 258.082733 
 127.214222 35.791667 265.637027 
 127.214333 35.791667 263.286148 
 127.214444 35.791667 256.988474 
 127.214667 35.791667 252.679530 
 127.214889 35.791667 260.291108 
 127.215000 35.791667 260.241951 
 127.215111 35.791667 255.822937 
 127.215222 35.791667 247.908432 
 127.214111 35.791778 263.717904 
 127.214222 35.791778 269.019395 
 127.214333 35.791778 270.951868 
 127.214444 35.791778 272.610486 
 127.214667 35.791778 265.898535 
 127.214889 35.791778 261.343555 
 127.215000 35.791778 259.056998 
 127.215111 35.791778 252.682042 
 127.215222 35.791778 245.215999 
 127.214111 35.791889 267.561610 
 127.214222 35.791889 272.285114 
 127.214333 35.791889 279.080267 
 127.214444 35.791889 286.631893 
 127.214667 35.791889 278.773083 
 127.214889 35.791889 261.708345 
 127.215000 35.791889 256.974858 
 127.215111 35.791889 249.274342 
 127.215222 35.791889 243.267236 
 127.214222 35.791889 272.285114 
 127.214333 35.791889 279.080267 
 127.214444 35.791889 286.631893 
 127.214556 35.791889 287.701146 
 127.214778 35.791889 266.016657 
 127.215000 35.791889 256.974858 
 127.215111 35.791889 249.274342 
 127.215222 35.791889 243.267236 
 127.215333 35.791889 241.228862 
 127.214222 35.792000 276.705859 
 127.214333 35.792000 287.232925 
 127.214444 35.792000 294.802046 
 127.214556 35.792000 295.114257 
 127.214778 35.792000 271.591000 
 127.215000 35.792000 254.295882 
 127.215111 35.792000 246.252403 
 127.215222 35.792000 242.051870 
 127.215333 35.792000 241.179029 
 127.214222 35.792111 283.061603 
 127.214333 35.792111 293.781018 
 127.214444 35.792111 298.277674 
 127.214556 35.792111 297.285052 
 127.214778 35.792111 277.976403 
 127.215000 35.792111 251.812539 
 127.215111 35.792111 244.081742 
 127.215222 35.792111 241.432845 
 127.215333 35.792111 241.494917 
 127.214222 35.792222 290.337655 
 127.214333 35.792222 297.715687 
 127.214444 35.792222 299.358717 
 127.214556 35.792222 297.183858 
 127.214778 35.792222 282.815813 
 127.215000 35.792222 250.686763 
 127.215111 35.792222 242.903126 
 127.215222 35.792222 241.291897 
 127.215333 35.792222 242.230141 
 127.214333 35.792222 297.715687 
 127.214444 35.792222 299.358717 
 127.214556 35.792222 297.183858 
 127.214667 35.792222 291.137328 
 127.214889 35.792222 268.386771 
 127.215111 35.792222 242.903126 
 127.215222 35.792222 241.291897 
 127.215333 35.792222 242.230141 
 127.215444 35.792222 245.409608 
 127.214333 35.792333 299.481498 
 127.214444 35.792333 299.322726 
 127.214556 35.792333 296.071286 
 127.214667 35.792333 290.443844 
 127.214889 35.792333 273.314286 
 127.215111 35.792333 242.751409 
 127.215222 35.792333 241.609396 
 127.215333 35.792333 243.444001 
 127.215444 35.792333 247.251503 
 127.214333 35.792444 299.994398 
 127.214444 35.792444 298.650119 
 127.214556 35.792444 294.434784 
 127.214667 35.792444 289.408368 
 127.214889 35.792444 276.987021 
 127.215111 35.792444 243.834117 
 127.215222 35.792444 242.486413 
 127.215333 35.792444 245.101224 
 127.215444 35.792444 248.866661 
 127.214444 35.792444 298.650119 
 127.214556 35.792444 294.434784 
 127.214667 35.792444 289.408368 
 127.214778 35.792444 285.782205 
 127.215000 35.792444 255.596900 
 127.215222 35.792444 242.486413 
 127.215333 35.792444 245.101224 
 127.215444 35.792444 248.866661 
 127.215556 35.792444 250.947118 
 127.214444 35.792555 297.460595 
 127.214556 35.792555 292.585245 
 127.214667 35.792555 288.378259 
 127.214778 35.792555 285.482611 
 127.215000 35.792555 260.901158 
 127.215222 35.792555 244.110394 
 127.215333 35.792555 246.957625 
 127.215444 35.792555 249.999802 
 127.215556 35.792555 251.169897 
 127.214444 35.792667 295.784289 
 127.214556 35.792667 290.783044 
 127.214667 35.792667 287.382465 
 127.214778 35.792667 284.517833 
 127.215000 35.792667 265.877147 
 127.215222 35.792667 246.627464 
 127.215333 35.792667 248.637940 
 127.215444 35.792667 250.560795 
 127.215556 35.792667 250.924739 
 127.214556 35.792667 290.783044 
 127.214667 35.792667 287.382465 
 127.214778 35.792667 284.517833 
 127.214889 35.792667 278.444014 
 127.215111 35.792667 251.744892 
 127.215333 35.792667 248.637940 
 127.215444 35.792667 250.560795 
 127.215556 35.792667 250.924739 
 127.215667 35.792667 249.968284 
 127.214556 35.792778 289.195332 
 127.214667 35.792778 286.292937 
 127.214778 35.792778 282.912524 
 127.214889 35.792778 277.076228 
 127.215111 35.792778 258.060599 
 127.215333 35.792778 249.796208 
 127.215444 35.792778 250.481886 
 127.215556 35.792778 250.019361 
 127.215667 35.792778 247.726127 
 127.214556 35.792889 287.798997 
 127.214667 35.792889 284.898696 
 127.214778 35.792889 280.699548 
 127.214889 35.792889 275.230653 
 127.215111 35.792889 263.357826 
 127.215333 35.792889 250.208860 
 127.215444 35.792889 249.585409 
 127.215556 35.792889 248.093854 
 127.215667 35.792889 243.864341 
 127.214667 35.792889 284.898696 
 127.214778 35.792889 280.699548 
 127.214889 35.792889 275.230653 
 127.215000 35.792889 270.239385 
 127.215222 35.792889 253.260795 
 127.215444 35.792889 249.585409 
 127.215556 35.792889 248.093854 
 127.215667 35.792889 243.864341 
 127.215778 35.792889 231.580561 
 127.214667 35.793000 283.007433 
 127.214778 35.793000 278.127776 
 127.214889 35.793000 273.501885 
 127.215000 35.793000 270.440386 
 127.215222 35.793000 256.070274 
 127.215444 35.793000 247.573846 
 127.215556 35.793000 244.853112 
 127.215667 35.793000 238.664321 
 127.215778 35.793000 225.537608 
 127.214667 35.793111 280.584345 
 127.214778 35.793111 275.640207 
 127.214889 35.793111 272.156701 
 127.215000 35.793111 270.090289 
 127.215222 35.793111 257.669044 
 127.215444 35.793111 244.316017 
 127.215556 35.793111 240.600660 
 127.215667 35.793111 233.457535 
 127.215778 35.793111 221.630919 
 127.214778 35.793111 275.640207 
 127.214889 35.793111 272.156701 
 127.215000 35.793111 270.090289 
 127.215111 35.793111 267.040480 
 127.215333 35.793111 248.032263 
 127.215556 35.793111 240.600660 
 127.215667 35.793111 233.457535 
 127.215778 35.793111 221.630919 
 127.215889 35.793111 214.709221 
 127.214778 35.793222 273.610055 
 127.214889 35.793222 271.150043 
 127.215000 35.793222 269.245520 
 127.215111 35.793222 265.931518 
 127.215333 35.793222 245.523261 
 127.215556 35.793222 236.381238 
 127.215667 35.793222 229.508529 
 127.215778 35.793222 219.486177 
 127.215889 35.793222 214.227171 
 127.214778 35.793333 272.162479 
 127.214889 35.793333 270.276795 
 127.215000 35.793333 267.726653 
 127.215111 35.793333 263.522378 
 127.215333 35.793333 243.151858 
 127.215556 35.793333 233.192438 
 127.215667 35.793333 227.094527 
 127.215778 35.793333 218.421354 
 127.215889 35.793333 214.071065 
 127.214778 35.793444 271.178689 
 127.214889 35.793444 269.269578 
 127.215000 35.793444 265.479818 
 127.215111 35.793444 260.817947 
 127.215333 35.793444 241.868304 
 127.215556 35.793444 231.230120 
 127.215667 35.793444 225.823421 
 127.215778 35.793444 217.970085 
 127.215889 35.793444 214.181365 
 127.214889 35.793444 269.269578 
 127.215000 35.793444 265.479818 
 127.215111 35.793444 260.817947 
 127.215222 35.793444 255.535621 
 127.215444 35.793444 234.083888 
 127.215667 35.793444 225.823421 
 127.215778 35.793444 217.970085 
 127.215889 35.793444 214.181365 
 127.216000 35.793444 214.593560 
 127.214889 35.793555 267.913715 
 127.215000 35.793555 262.908286 
 127.215111 35.793555 258.652522 
 127.215222 35.793555 254.321500 
 127.215444 35.793555 232.688760 
 127.215667 35.793555 225.320801 
 127.215778 35.793555 217.988621 
 127.215889 35.793555 214.696769 
 127.216000 35.793555 216.702937 
 127.214889 35.793667 266.160249 
 127.215000 35.793667 260.603322 
 127.215111 35.793667 257.096053 
 127.215222 35.793667 252.716065 
 127.215444 35.793667 232.136064 
 127.215667 35.793667 225.539835 
 127.215778 35.793667 218.748807 
 127.215889 35.793667 216.045167 
 127.216000 35.793667 220.109538 
 127.215000 35.793667 260.603322 
 127.215111 35.793667 257.096053 
 127.215222 35.793667 252.716065 
 127.215333 35.793667 240.487331 
 127.215556 35.793667 229.898691 
 127.215778 35.793667 218.748807 
 127.215889 35.793667 216.045167 
 127.216000 35.793667 220.109538 
 127.216111 35.793667 227.031829 
 127.215000 35.793778 258.858184 
 127.215111 35.793778 255.776157 
 127.215222 35.793778 250.172839 
 127.215333 35.793778 238.601990 
 127.215556 35.793778 230.345823 
 127.215778 35.793778 221.294927 
 127.215889 35.793778 219.040125 
 127.216000 35.793778 224.226370 
 127.216111 35.793778 229.547311 
 127.215000 35.793889 257.570772 
 127.215111 35.793889 254.187382 
 127.215222 35.793889 246.449883 
 127.215333 35.793889 236.363497 
 127.215556 35.793889 232.191787 
 127.215778 35.793889 227.393371 
 127.215889 35.793889 224.483515 
 127.216000 35.793889 227.988718 
 127.216111 35.793889 230.983026 
 127.215111 35.793889 254.187382 
 127.215222 35.793889 246.449883 
 127.215333 35.793889 236.363497 
 127.215444 35.793889 232.641183 
 127.215667 35.793889 231.250933 
 127.215889 35.793889 224.483515 
 127.216000 35.793889 227.988718 
 127.216111 35.793889 230.983026 
 127.216222 35.793889 231.815121 
 127.215111 35.794000 251.784158 
 127.215222 35.794000 242.071757 
 127.215333 35.794000 234.796121 
 127.215444 35.794000 234.012941 
 127.215667 35.794000 238.456291 
 127.215889 35.794000 231.824598 
 127.216000 35.794000 231.013127 
 127.216111 35.794000 231.902829 
 127.216222 35.794000 232.049692 
 127.215111 35.794111 248.209127 
 127.215222 35.794111 238.246354 
 127.215333 35.794111 234.515888 
 127.215444 35.794111 237.198135 
 127.215667 35.794111 245.449973 
 127.215889 35.794111 238.786579 
 127.216000 35.794111 233.817040 
 127.216111 35.794111 232.903860 
 127.216222 35.794111 232.304805 
 127.215222 35.794111 238.246354 
 127.215333 35.794111 234.515888 
 127.215444 35.794111 237.198135 
 127.215556 35.794111 243.635025 
 127.215778 35.794111 243.951252 
 127.216000 35.794111 233.817040 
 127.216111 35.794111 232.903860 
 127.216222 35.794111 232.304805 
 127.216333 35.794111 231.014097 
 127.215222 35.794222 235.920367 
 127.215333 35.794222 236.054376 
 127.215444 35.794222 243.449032 
 127.215556 35.794222 252.226039 
 127.215778 35.794222 247.786933 
 127.216000 35.794222 237.356492 
 127.216111 35.794222 234.753823 
 127.216222 35.794222 232.800212 
 127.216333 35.794222 230.596840 
 127.215222 35.794333 235.513883 
 127.215333 35.794333 240.309793 
 127.215444 35.794333 252.818173 
 127.215556 35.794333 260.305146 
 127.215778 35.794333 249.638245 
 127.216000 35.794333 242.079052 
 127.216111 35.794333 238.121487 
 127.216222 35.794333 233.667908 
 127.216333 35.794333 230.437753 
 127.215222 35.794444 237.440112 
 127.215333 35.794444 248.004845 
 127.215444 35.794444 262.765517 
 127.215556 35.794444 266.596233 
 127.215778 35.794444 251.173238 
 127.216000 35.794444 246.865115 
 127.216111 35.794444 242.310917 
 127.216222 35.794444 234.760711 
 127.216333 35.794444 230.548999 
 127.215333 35.794444 248.004845 
 127.215444 35.794444 262.765517 
 127.215556 35.794444 266.596233 
 127.215667 35.794444 256.326553 
 127.215889 35.794444 249.590435 
 127.216111 35.794444 242.310917 
 127.216222 35.794444 234.760711 
 127.216333 35.794444 230.548999 
 127.216444 35.794444 230.517227 
 127.215333 35.794555 257.881878 
 127.215444 35.794555 270.222557 
 127.215556 35.794555 270.844387 
 127.215667 35.794555 259.841982 
 127.215889 35.794555 251.859136 
 127.216111 35.794555 245.584967 
 127.216222 35.794555 235.864706 
 127.216333 35.794555 230.903850 
 127.216444 35.794555 231.570927 
 127.215333 35.794667 266.804934 
 127.215444 35.794667 274.582689 
 127.215556 35.794667 273.456856 
 127.215667 35.794667 263.890497 
 127.215889 35.794667 254.614247 
 127.216111 35.794667 247.557827 
 127.216222 35.794667 236.959645 
 127.216333 35.794667 231.556958 
 127.216444 35.794667 233.277929 
 127.215444 35.794667 274.582689 
 127.215556 35.794667 273.456856 
 127.215667 35.794667 263.890497 
 127.215778 35.794667 258.124385 
 127.216000 35.794667 251.938940 
 127.216222 35.794667 236.959645 
 127.216333 35.794667 231.556958 
 127.216444 35.794667 233.277929 
 127.216556 35.794667 238.091282 
 127.215444 35.794778 276.780932 
 127.215556 35.794778 274.878006 
 127.215667 35.794778 267.820686 
 127.215778 35.794778 263.733562 
 127.216000 35.794778 253.053555 
 127.216222 35.794778 238.148750 
 127.216333 35.794778 232.654091 
 127.216444 35.794778 235.549532 
 127.216556 35.794778 240.220134 
 127.215444 35.794889 277.773715 
 127.215556 35.794889 275.398536 
 127.215667 35.794889 270.617950 
 127.215778 35.794889 268.098909 
 127.216000 35.794889 254.200886 
 127.216222 35.794889 239.687624 
 127.216333 35.794889 234.396021 
 127.216444 35.794889 237.955422 
 127.216556 35.794889 242.045552 
 127.215556 35.794889 275.398536 
 127.215667 35.794889 270.617950 
 127.215778 35.794889 268.098909 
 127.215889 35.794889 261.564250 
 127.216111 35.794889 249.954412 
 127.216333 35.794889 234.396021 
 127.216444 35.794889 237.955422 
 127.216556 35.794889 242.045552 
 127.216667 35.794889 250.649023 
 127.215556 35.795000 275.222099 
 127.215667 35.795000 271.998883 
 127.215778 35.795000 270.218968 
 127.215889 35.795000 264.343422 
 127.216111 35.795000 251.747057 
 127.216333 35.795000 236.995585 
 127.216444 35.795000 240.099206 
 127.216556 35.795000 244.020729 
 127.216667 35.795000 256.859043 
 127.215556 35.795111 274.616054 
 127.215667 35.795111 272.337059 
 127.215778 35.795111 270.479413 
 127.215889 35.795111 265.531181 
 127.216111 35.795111 255.468796 
 127.216333 35.795111 240.730079 
 127.216444 35.795111 242.070597 
 127.216556 35.795111 246.834270 
 127.216667 35.795111 264.093453 
 127.215667 35.795111 272.337059 
 127.215778 35.795111 270.479413 
 127.215889 35.795111 265.531181 
 127.216000 35.795111 258.992348 
 127.216222 35.795111 247.851754 
 127.216444 35.795111 242.070597 
 127.216556 35.795111 246.834270 
 127.216667 35.795111 264.093453 
 127.216778 35.795111 280.960643 
 127.215667 35.795222 271.904027 
 127.215778 35.795222 269.315860 
 127.215889 35.795222 265.196422 
 127.216000 35.795222 262.092461 
 127.216222 35.795222 256.863398 
 127.216444 35.795222 244.672512 
 127.216556 35.795222 251.401981 
 127.216667 35.795222 271.137694 
 127.216778 35.795222 283.371225 
 127.215667 35.795333 270.655364 
 127.215778 35.795333 267.267705 
 127.215889 35.795333 264.365849 
 127.216000 35.795333 263.965611 
 127.216222 35.795333 264.502163 
 127.216444 35.795333 249.585361 
 127.216556 35.795333 258.687340 
 127.216667 35.795333 277.065978 
 127.216778 35.795333 284.939307 
 127.215778 35.795333 267.267705 
 127.215889 35.795333 264.365849 
 127.216000 35.795333 263.965611 
 127.216111 35.795333 265.626051 
 127.216333 35.795333 254.146508 
 127.216556 35.795333 258.687340 
 127.216667 35.795333 277.065978 
 127.216778 35.795333 284.939307 
 127.216889 35.795333 287.495533 
 127.215778 35.795444 265.265147 
 127.215889 35.795444 263.831796 
 127.216000 35.795444 264.931904 
 127.216111 35.795444 267.594353 
 127.216333 35.795444 262.932917 
 127.216556 35.795444 268.805228 
 127.216667 35.795444 281.749227 
 127.216778 35.795444 286.291437 
 127.216889 35.795444 290.259089 
 127.215778 35.795556 263.989662 
 127.215889 35.795556 263.736419 
 127.216000 35.795556 265.673401 
 127.216111 35.795556 268.486411 
 127.216333 35.795556 269.961751 
 127.216556 35.795556 279.154056 
 127.216667 35.795556 285.411351 
 127.216778 35.795556 288.035535 
 127.216889 35.795556 295.641496 
 127.215778 35.795667 263.454974 
 127.215889 35.795667 264.011346 
 127.216000 35.795667 266.491118 
 127.216111 35.795667 269.200835 
 127.216333 35.795667 275.050744 
 127.216556 35.795667 286.078402 
 127.216667 35.795667 288.142757 
 127.216778 35.795667 290.630070 
 127.216889 35.795667 302.535497 
 127.215889 35.795667 264.011346 
 127.216000 35.795667 266.491118 
 127.216111 35.795667 269.200835 
 127.216222 35.795667 271.111661 
 127.216444 35.795667 281.780550 
 127.216667 35.795667 288.142757 
 127.216778 35.795667 290.630070 
 127.216889 35.795667 302.535497 
 127.217000 35.795667 313.486082 
 127.215889 35.795778 264.633835 
 127.216000 35.795778 267.470726 
 127.216111 35.795778 270.183316 
 127.216222 35.795778 273.300662 
 127.216444 35.795778 287.311951 
 127.216667 35.795778 289.922617 
 127.216778 35.795778 293.838341 
 127.216889 35.795778 307.975437 
 127.217000 35.795778 314.969375 
 127.215889 35.795889 265.621596 
 127.216000 35.795889 268.652735 
 127.216111 35.795889 271.865731 
 127.216222 35.795889 277.003181 
 127.216444 35.795889 290.544071 
 127.216667 35.795889 291.043898 
 127.216778 35.795889 297.046050 
 127.216889 35.795889 311.412027 
 127.217000 35.795889 315.909378 
 127.216000 35.795889 268.652735 
 127.216111 35.795889 271.865731 
 127.216222 35.795889 277.003181 
 127.216333 35.795889 285.083513 
 127.216556 35.795889 290.672144 
 127.216778 35.795889 297.046050 
 127.216889 35.795889 311.412027 
 127.217000 35.795889 315.909378 
 127.217111 35.795889 316.119968 
 127.216000 35.796000 270.196480 
 127.216111 35.796000 274.799942 
 127.216222 35.796000 282.376242 
 127.216333 35.796000 290.499534 
 127.216556 35.796000 291.679691 
 127.216778 35.796000 300.690468 
 127.216889 35.796000 314.437249 
 127.217000 35.796000 317.156777 
 127.217111 35.796000 316.449122 
 127.216000 35.796111 272.459479 
 127.216111 35.796111 279.344248 
 127.216222 35.796111 288.433331 
 127.216333 35.796111 295.033081 
 127.216556 35.796111 293.327456 
 127.216778 35.796111 306.045520 
 127.216889 35.796111 318.579685 
 127.217000 35.796111 319.415746 
 127.217111 35.796111 316.938578 
 127.216111 35.796111 279.344248 
 127.216222 35.796111 288.433331 
 127.216333 35.796111 295.033081 
 127.216444 35.796111 296.017193 
 127.216667 35.796111 294.281103 
 127.216889 35.796111 318.579685 
 127.217000 35.796111 319.415746 
 127.217111 35.796111 316.938578 
 127.217222 35.796111 313.880888 
 127.216111 35.796222 285.097589 
 127.216222 35.796222 293.683317 
 127.216333 35.796222 298.321356 
 127.216444 35.796222 299.292218 
 127.216667 35.796222 298.840820 
 127.216889 35.796222 323.996119 
 127.217000 35.796222 322.875581 
 127.217111 35.796222 317.429008 
 127.217222 35.796222 313.623795 
 127.216111 35.796333 290.768277 
 127.216222 35.796333 297.374472 
 127.216333 35.796333 300.788630 
 127.216444 35.796333 303.886768 
 127.216667 35.796333 307.783550 
 127.216889 35.796333 328.931631 
 127.217000 35.796333 326.335700 
 127.217111 35.796333 317.679505 
 127.217222 35.796333 313.488447 
 127.216222 35.796333 297.374472 
 127.216333 35.796333 300.788630 
 127.216444 35.796333 303.886768 
 127.216556 35.796333 305.501188 
 127.216778 35.796333 321.733610 
 127.217000 35.796333 326.335700 
 127.217111 35.796333 317.679505 
 127.217222 35.796333 313.488447 
 127.217333 35.796333 312.745006 
 127.216222 35.796444 299.768143 
 127.216333 35.796444 303.309425 
 127.216444 35.796444 311.076809 
 127.216556 35.796444 319.769181 
 127.216778 35.796444 328.375945 
 127.217000 35.796444 328.448785 
 127.217111 35.796444 317.684744 
 127.217222 35.796444 313.383712 
 127.217333 35.796444 312.194511 
 127.216222 35.796556 301.562985 
 127.216333 35.796556 307.042937 
 127.216444 35.796556 321.423525 
 127.216556 35.796556 335.009031 
 127.216778 35.796556 333.104970 
 127.217000 35.796556 329.304722 
 127.217111 35.796556 317.576553 
 127.217222 35.796556 313.216341 
 127.217333 35.796556 310.780682 
 127.216222 35.796667 303.551520 
 127.216333 35.796667 313.221187 
 127.216444 35.796667 332.902302 
 127.216556 35.796667 345.132798 
 127.216778 35.796667 336.397278 
 127.217000 35.796667 329.541789 
 127.217111 35.796667 317.445649 
 127.217222 35.796667 312.845809 
 127.217333 35.796667 308.074467 
 127.216333 35.796667 313.221187 
 127.216444 35.796667 332.902302 
 127.216556 35.796667 345.132798 
 127.216667 35.796667 344.129722 
 127.216889 35.796667 334.180664 
 127.217111 35.796667 317.445649 
 127.217222 35.796667 312.845809 
 127.217333 35.796667 308.074467 
 127.217444 35.796667 299.901679 
 127.216333 35.796778 322.322668 
 127.216444 35.796778 342.237066 
 127.216556 35.796778 350.103652 
 127.216667 35.796778 348.495514 
 127.216889 35.796778 334.267941 
 127.217111 35.796778 317.259208 
 127.217222 35.796778 312.058672 
 127.217333 35.796778 304.583286 
 127.217444 35.796778 297.854112 
 127.216333 35.796889 332.713747 
 127.216444 35.796889 348.057401 
 127.216556 35.796889 352.211609 
 127.216667 35.796889 349.865879 
 127.216889 35.796889 334.016831 
 127.217111 35.796889 316.782497 
 127.217222 35.796889 310.787721 
 127.217333 35.796889 301.586324 
 127.217444 35.796889 296.786866 
 127.216444 35.796889 348.057401 
 127.216556 35.796889 352.211609 
 127.216667 35.796889 349.865879 
 127.216778 35.796889 338.821080 
 127.217000 35.796889 329.207187 
 127.217222 35.796889 310.787721 
 127.217333 35.796889 301.586324 
 127.217444 35.796889 296.786866 
 127.217556 35.796889 296.119023 
 127.216444 35.797000 351.142431 
 127.216556 35.797000 353.009578 
 127.216667 35.797000 349.598228 
 127.216778 35.797000 338.339957 
 127.217000 35.797000 328.533544 
 127.217222 35.797000 309.463805 
 127.217333 35.797000 299.533078 
 127.217444 35.797000 295.945289 
 127.217556 35.797000 295.501293 
 127.216444 35.797111 352.629705 
 127.216556 35.797111 353.141118 
 127.216667 35.797111 348.312699 
 127.216778 35.797111 337.973714 
 127.217000 35.797111 327.702166 
 127.217222 35.797111 308.507680 
 127.217333 35.797111 298.121360 
 127.217444 35.797111 294.955090 
 127.217556 35.797111 293.948279 
 127.216556 35.797111 353.141118 
 127.216667 35.797111 348.312699 
 127.216778 35.797111 337.973714 
 127.216889 35.797111 333.854239 
 127.217111 35.797111 315.022161 
 127.217333 35.797111 298.121360 
 127.217444 35.797111 294.955090 
 127.217556 35.797111 293.948279 
 127.217667 35.797111 280.043956 
 127.216556 35.797222 352.698491 
 127.216667 35.797222 346.396395 
 127.216778 35.797222 338.403043 
 127.216889 35.797222 334.483947 
 127.217111 35.797222 314.440500 
 127.217333 35.797222 297.237545 
 127.217444 35.797222 294.094516 
 127.217556 35.797222 292.233835 
 127.217667 35.797222 278.942898 
 127.216556 35.797333 351.401854 
 127.216667 35.797333 344.566183 
 127.216778 35.797333 339.574164 
 127.216889 35.797333 335.795441 
 127.217111 35.797333 314.521352 
 127.217333 35.797333 296.977525 
 127.217444 35.797333 293.919879 
 127.217556 35.797333 292.252263 
 127.217667 35.797333 279.884544 
 127.216667 35.797333 344.566183 
 127.216778 35.797333 339.574164 
 127.216889 35.797333 335.795441 
 127.217000 35.797333 327.020721 
 127.217222 35.797333 307.982919 
 127.217444 35.797333 293.919879 
 127.217556 35.797333 292.252263 
 127.217667 35.797333 279.884544 
 127.217778 35.797333 278.705812 
 127.216667 35.797444 343.486342 
 127.216778 35.797444 340.832001 
 127.216889 35.797444 337.494059 
 127.217000 35.797444 328.317482 
 127.217222 35.797444 308.870899 
 127.217444 35.797444 294.511935 
 127.217556 35.797444 293.478081 
 127.217667 35.797444 282.729914 
 127.217778 35.797444 282.645432 
 127.216667 35.797556 343.059629 
 127.216778 35.797556 341.664130 
 127.216889 35.797556 338.770375 
 127.217000 35.797556 330.932895 
 127.217222 35.797556 311.431105 
 127.217444 35.797556 295.836822 
 127.217556 35.797556 294.948287 
 127.217667 35.797556 287.707751 
 127.217778 35.797556 288.482715 
 127.216667 35.797667 342.913833 
 127.216778 35.797667 341.974457 
 127.216889 35.797667 338.965891 
 127.217000 35.797667 333.235274 
 127.217222 35.797667 316.593945 
 127.217444 35.797667 298.335959 
 127.217556 35.797667 296.643487 
 127.217667 35.797667 292.112712 
 127.217778 35.797667 291.678520 
 127.216778 35.797667 341.974457 
 127.216889 35.797667 338.965891 
 127.217000 35.797667 333.235274 
 127.217111 35.797667 326.688580 
 127.217333 35.797667 302.782832 
 127.217556 35.797667 296.643487 
 127.217667 35.797667 292.112712 
 127.217778 35.797667 291.678520 
 127.217889 35.797667 291.472639 
 127.216778 35.797778 341.801880 
 127.216889 35.797778 338.143254 
 127.217000 35.797778 334.225194 
 127.217111 35.797778 331.093046 
 127.217333 35.797778 306.941422 
 127.217556 35.797778 299.206708 
 127.217667 35.797778 293.929408 
 127.217778 35.797778 291.972510 
 127.217889 35.797778 290.204762 
 127.216778 35.797889 341.111624 
 127.216889 35.797889 336.890693 
 127.217000 35.797889 334.395485 
 127.217111 35.797889 332.545298 
 127.217333 35.797889 309.295417 
 127.217556 35.797889 302.260667 
 127.217667 35.797889 294.796897 
 127.217778 35.797889 291.167627 
 127.217889 35.797889 288.801703 
 127.216889 35.797889 336.890693 
 127.217000 35.797889 334.395485 
 127.217111 35.797889 332.545298 
 127.217222 35.797889 324.529765 
 127.217444 35.797889 304.814554 
 127.217667 35.797889 294.796897 
 127.217778 35.797889 291.167627 
 127.217889 35.797889 288.801703 
 127.218000 35.797889 287.233271 
 127.216889 35.798000 335.785281 
 127.217000 35.798000 334.237606 
 127.217111 35.798000 332.198344 
 127.217222 35.798000 324.659392 
 127.217444 35.798000 306.035201 
 127.217667 35.798000 296.110967 
 127.217778 35.798000 290.466932 
 127.217889 35.798000 288.169404 
 127.218000 35.798000 287.206224 
 127.216889 35.798111 335.047313 
 127.217000 35.798111 333.864074 
 127.217111 35.798111 330.917741 
 127.217222 35.798111 324.621869 
 127.217444 35.798111 306.804806 
 127.217667 35.798111 298.591712 
 127.217778 35.798111 291.293267 
 127.217889 35.798111 288.704388 
 127.218000 35.798111 287.429977 
 127.217000 35.798111 333.864074 
 127.217111 35.798111 330.917741 
 127.217222 35.798111 324.621869 
 127.217333 35.798111 313.383929 
 127.217556 35.798111 305.409358 
 127.217778 35.798111 291.293267 
 127.217889 35.798111 288.704388 
 127.218000 35.798111 287.429977 
 127.218111 35.798111 287.076780 
 127.217000 35.798222 333.207482 
 127.217111 35.798222 329.360639 
 127.217222 35.798222 324.878079 
 127.217333 35.798222 316.214487 
 127.217556 35.798222 306.284510 
 127.217778 35.798222 294.664457 
 127.217889 35.798222 290.685350 
 127.218000 35.798222 287.902594 
 127.218111 35.798222 287.189660 
 127.217000 35.798333 332.200560 
 127.217111 35.798333 328.088307 
 127.217222 35.798333 325.425800 
 127.217333 35.798333 319.859219 
 127.217556 35.798333 307.917625 
 127.217778 35.798333 300.118889 
 127.217889 35.798333 294.519151 
 127.218000 35.798333 288.823151 
 127.218111 35.798333 287.509491 
 127.217111 35.798333 328.088307 
 127.217222 35.798333 325.425800 
 127.217333 35.798333 319.859219 
 127.217444 35.798333 311.387622 
 127.217667 35.798333 305.717471 
 127.217889 35.798333 294.519151 
 127.218000 35.798333 288.823151 
 127.218111 35.798333 287.509491 
 127.218222 35.798333 288.495448 
 127.217111 35.798444 327.375063 
 127.217222 35.798444 326.462640 
 127.217333 35.798444 324.894893 
 127.217444 35.798444 318.748170 
 127.217667 35.798444 308.132559 
 127.217889 35.798444 299.758754 
 127.218000 35.798444 290.828614 
 127.218111 35.798444 288.402840 
 127.218222 35.798444 289.880036 
 127.217111 35.798556 327.337936 
 127.217222 35.798556 328.539409 
 127.217333 35.798556 330.982138 
 127.217444 35.798556 328.561075 
 127.217667 35.798556 309.760146 
 127.217889 35.798556 304.542099 
 127.218000 35.798556 295.270309 
 127.218111 35.798556 290.395054 
 127.218222 35.798556 291.034429 
 127.217222 35.798667 331.992566 
 127.217333 35.798667 335.761440 
 127.217444 35.798667 334.718698 
 127.217556 35.798667 324.371241 
 127.217778 35.798667 309.092161 
 127.218000 35.798667 301.673358 
 127.218111 35.798667 293.332461 
 127.218222 35.798667 291.845960 
 127.218333 35.798667 291.888520 
 127.217222 35.798778 335.699679 
 127.217333 35.798778 338.065009 
 127.217444 35.798778 336.467987 
 127.217556 35.798778 328.384484 
 127.217778 35.798778 310.030056 
 127.218000 35.798778 306.028328 
 127.218111 35.798778 296.726111 
 127.218222 35.798778 292.983096 
 127.218333 35.798778 292.517357 
 127.217222 35.798889 338.060129 
 127.217333 35.798889 338.722522 
 127.217444 35.798889 335.993168 
 127.217556 35.798889 329.799602 
 127.217778 35.798889 312.202849 
 127.218000 35.798889 307.941292 
 127.218111 35.798889 300.947157 
 127.218222 35.798889 295.577560 
 127.218333 35.798889 293.797713 
 127.217333 35.798889 338.722522 
 127.217444 35.798889 335.993168 
 127.217556 35.798889 329.799602 
 127.217667 35.798889 321.525773 
 127.217889 35.798889 309.205342 
 127.218111 35.798889 300.947157 
 127.218222 35.798889 295.577560 
 127.218333 35.798889 293.797713 
 127.218444 35.798889 293.859895 
 127.217333 35.799000 338.571819 
 127.217444 35.799000 334.651122 
 127.217556 35.799000 330.112199 
 127.217667 35.799000 327.186560 
 127.217889 35.799000 310.040749 
 127.218111 35.799000 306.161464 
 127.218222 35.799000 300.571676 
 127.218333 35.799000 295.655089 
 127.218444 35.799000 294.476377 
 127.217333 35.799111 337.951935 
 127.217444 35.799111 333.158570 
 127.217556 35.799111 330.408918 
 127.217667 35.799111 331.486760 
 127.217889 35.799111 312.898341 
 127.218111 35.799111 311.132616 
 127.218222 35.799111 306.439745 
 127.218333 35.799111 297.461092 
 127.218444 35.799111 295.247084 
 127.217444 35.799111 333.158570 
 127.217556 35.799111 330.408918 
 127.217667 35.799111 331.486760 
 127.217778 35.799111 326.898933 
 127.218000 35.799111 311.195580 
 127.218222 35.799111 306.439745 
 127.218333 35.799111 297.461092 
 127.218444 35.799111 295.247084 
 127.218556 35.799111 298.905611 
 127.217444 35.799222 331.974116 
 127.217556 35.799222 331.228548 
 127.217667 35.799222 334.701122 
 127.217778 35.799222 334.281450 
 127.218000 35.799222 316.084032 
 127.218222 35.799222 310.482965 
 127.218333 35.799222 298.926638 
 127.218444 35.799222 296.485899 
 127.218556 35.799222 301.751890 
 127.217444 35.799333 331.364125 
 127.217556 35.799333 332.780565 
 127.217667 35.799333 337.040097 
 127.217778 35.799333 337.862592 
 127.218000 35.799333 323.814574 
 127.218222 35.799333 312.891134 
 127.218333 35.799333 300.489765 
 127.218444 35.799333 298.633289 
 127.218556 35.799333 305.215301 
 127.217556 35.799333 332.780565 
 127.217667 35.799333 337.040097 
 127.217778 35.799333 337.862592 
 127.217889 35.799333 330.156348 
 127.218111 35.799333 316.952615 
 127.218333 35.799333 300.489765 
 127.218444 35.799333 298.633289 
 127.218556 35.799333 305.215301 
 127.218667 35.799333 311.604250 
 127.217556 35.799444 334.861240 
 127.217667 35.799444 338.855157 
 127.217778 35.799444 340.326811 
 127.217889 35.799444 334.730708 
 127.218111 35.799444 319.826688 
 127.218333 35.799444 303.474361 
 127.218444 35.799444 302.199022 
 127.218556 35.799444 309.169549 
 127.218667 35.799444 315.626204 
 127.217556 35.799556 337.058895 
 127.217667 35.799556 341.472459 
 127.217778 35.799556 345.427116 
 127.217889 35.799556 337.940249 
 127.218111 35.799556 325.284223 
 127.218333 35.799556 311.083753 
 127.218444 35.799556 307.675858 
 127.218556 35.799556 314.114118 
 127.218667 35.799556 321.804781 
 127.217667 35.799556 341.472459 
 127.217778 35.799556 345.427116 
 127.217889 35.799556 337.940249 
 127.218000 35.799556 332.853938 
 127.218222 35.799556 323.087171 
 127.218444 35.799556 307.675858 
 127.218556 35.799556 314.114118 
 127.218667 35.799556 321.804781 
 127.218778 35.799556 335.686172 
 127.217667 35.799667 347.387961 
 127.217778 35.799667 354.697351 
 127.217889 35.799667 344.130744 
 127.218000 35.799667 336.547173 
 127.218222 35.799667 334.741354 
 127.218444 35.799667 315.502695 
 127.218556 35.799667 321.162771 
 127.218667 35.799667 330.876644 
 127.218778 35.799667 346.589808 
 127.217667 35.799778 356.605031 
 127.217778 35.799778 363.029410 
 127.217889 35.799778 354.730196 
 127.218000 35.799778 345.936418 
 127.218222 35.799778 342.182383 
 127.218444 35.799778 325.961675 
 127.218556 35.799778 331.186867 
 127.218667 35.799778 342.037309 
 127.218778 35.799778 356.424617 
 127.217667 35.799889 363.811301 
 127.217778 35.799889 367.119618 
 127.217889 35.799889 364.384248 
 127.218000 35.799889 359.461105 
 127.218222 35.799889 345.058532 
 127.218444 35.799889 337.972134 
 127.218556 35.799889 342.983415 
 127.218667 35.799889 352.476986 
 127.218778 35.799889 363.553151 
 127.217778 35.799889 367.119618 
 127.217889 35.799889 364.384248 
 127.218000 35.799889 359.461105 
 127.218111 35.799889 348.119566 
 127.218333 35.799889 343.384583 
 127.218556 35.799889 342.983415 
 127.218667 35.799889 352.476986 
 127.218778 35.799889 363.553151 
 127.218889 35.799889 373.758907 
 127.217778 35.800000 368.685310 
 127.217889 35.800000 368.914048 
 127.218000 35.800000 366.737574 
 127.218111 35.800000 353.533898 
 127.218333 35.800000 347.462763 
 127.218556 35.800000 353.304446 
 127.218667 35.800000 359.886257 
 127.218778 35.800000 368.230087 
 127.218889 35.800000 376.100665 
 127.217778 35.800111 369.383542 
 127.217889 35.800111 370.511078 
 127.218000 35.800111 370.304542 
 127.218111 35.800111 362.412473 
 127.218333 35.800111 353.879216 
 127.218556 35.800111 360.266509 
 127.218667 35.800111 364.379244 
 127.218778 35.800111 371.461158 
 127.218889 35.800111 377.559913 
 127.217889 35.800111 370.511078 
 127.218000 35.800111 370.304542 
 127.218111 35.800111 362.412473 
 127.218222 35.800111 354.366882 
 127.218444 35.800111 359.154964 
 127.218667 35.800111 364.379244 
 127.218778 35.800111 371.461158 
 127.218889 35.800111 377.559913 
 127.219000 35.800111 377.380703 
 127.217889 35.800222 371.496928 
 127.218000 35.800222 374.499783 
 127.218111 35.800222 376.205669 
 127.218222 35.800222 367.849633 
 127.218444 35.800222 369.475570 
 127.218667 35.800222 367.237046 
 127.218778 35.800222 373.886822 
 127.218889 35.800222 378.231100 
 127.219000 35.800222 374.973956 
 127.217889 35.800333 373.281606 
 127.218000 35.800333 382.030383 
 127.218111 35.800333 390.655166 
 127.218222 35.800333 384.437992 
 127.218444 35.800333 380.114953 
 127.218667 35.800333 369.473127 
 127.218778 35.800333 375.631408 
 127.218889 35.800333 378.021753 
 127.219000 35.800333 370.918010 
 127.218000 35.800333 382.030383 
 127.218111 35.800333 390.655166 
 127.218222 35.800333 384.437992 
 127.218333 35.800333 381.259676 
 127.218556 35.800333 369.158186 
 127.218778 35.800333 375.631408 
 127.218889 35.800333 378.021753 
 127.219000 35.800333 370.918010 
 127.219111 35.800333 353.093822 
 127.218000 35.800444 392.574405 
 127.218111 35.800444 399.625017 
 127.218222 35.800444 395.166231 
 127.218333 35.800444 390.677888 
 127.218556 35.800444 374.606838 
 127.218778 35.800444 376.314744 
 127.218889 35.800444 376.609400 
 127.219000 35.800444 365.242121 
 127.219111 35.800444 347.678388 
 127.218000 35.800556 400.894058 
 127.218111 35.800556 403.192464 
 127.218222 35.800556 399.023158 
 127.218333 35.800556 393.833815 
 127.218556 35.800556 379.594259 
 127.218778 35.800556 374.812881 
 127.218889 35.800556 373.341391 
 127.219000 35.800556 358.585302 
 127.219111 35.800556 343.872999 
 127.218111 35.800556 403.192464 
 127.218222 35.800556 399.023158 
 127.218333 35.800556 393.833815 
 127.218444 35.800556 390.753054 
 127.218667 35.800556 370.899900 
 127.218889 35.800556 373.341391 
 127.219000 35.800556 358.585302 
 127.219111 35.800556 343.872999 
 127.219222 35.800556 339.313865 
 127.218111 35.800667 403.899473 
 127.218222 35.800667 399.215880 
 127.218333 35.800667 394.041456 
 127.218444 35.800667 390.940798 
 127.218667 35.800667 365.928180 
 127.218889 35.800667 367.329151 
 127.219000 35.800667 352.078190 
 127.219111 35.800667 341.428101 
 127.219222 35.800667 338.710656 
 127.218111 35.800778 403.176755 
 127.218222 35.800778 397.819332 
 127.218333 35.800778 393.000559 
 127.218444 35.800778 389.032698 
 127.218667 35.800778 357.577705 
 127.218889 35.800778 358.487692 
 127.219000 35.800778 346.666801 
 127.219111 35.800778 339.888628 
 127.219222 35.800778 338.184342 
 127.218111 35.800889 401.424053 
 127.218222 35.800889 395.685080 
 127.218333 35.800889 390.935539 
 127.218444 35.800889 385.320714 
 127.218667 35.800889 351.720554 
 127.218889 35.800889 349.358945 
 127.219000 35.800889 342.698989 
 127.219111 35.800889 338.841068 
 127.219222 35.800889 337.476434 
 127.218222 35.800889 395.685080 
 127.218333 35.800889 390.935539 
 127.218444 35.800889 385.320714 
 127.218556 35.800889 371.773093 
 127.218778 35.800889 348.467759 
 127.219000 35.800889 342.698989 
 127.219111 35.800889 338.841068 
 127.219222 35.800889 337.476434 
 127.219333 35.800889 333.592059 
 127.218222 35.801000 393.034815 
 127.218333 35.801000 387.621082 
 127.218444 35.801000 380.693121 
 127.218556 35.801000 367.940161 
 127.218778 35.801000 343.647275 
 127.219000 35.801000 340.148363 
 127.219111 35.801000 338.021514 
 127.219222 35.801000 336.446632 
 127.219333 35.801000 331.058819 
 127.218222 35.801111 389.673222 
 127.218333 35.801111 383.342376 
 127.218444 35.801111 376.657547 
 127.218556 35.801111 365.874173 
 127.218778 35.801111 342.282120 
 127.219000 35.801111 338.799406 
 127.219111 35.801111 337.367186 
 127.219222 35.801111 335.328055 
 127.219333 35.801111 329.446325 
 127.218333 35.801111 383.342376 
 127.218444 35.801111 376.657547 
 127.218556 35.801111 365.874173 
 127.218667 35.801111 349.057838 
 127.218889 35.801111 341.136227 
 127.219111 35.801111 337.367186 
 127.219222 35.801111 335.328055 
 127.219333 35.801111 329.446325 
 127.219444 35.801111 326.099318 
 127.218333 35.801222 379.270611 
 127.218444 35.801222 374.037319 
 127.218556 35.801222 364.972624 
 127.218667 35.801222 349.503926 
 127.218889 35.801222 340.999385 
 127.219111 35.801222 336.976073 
 127.219222 35.801222 334.552470 
 127.219333 35.801222 328.884141 
 127.219444 35.801222 326.781301 
 127.218333 35.801333 376.354859 
 127.218444 35.801333 372.603885 
 127.218556 35.801333 364.691230 
 127.218667 35.801333 350.917914 
 127.218889 35.801333 342.766258 
 127.219111 35.801333 336.950435 
 127.219222 35.801333 334.298879 
 127.219333 35.801333 329.205110 
 127.219444 35.801333 328.422358 
 127.218444 35.801333 372.603885 
 127.218556 35.801333 364.691230 
 127.218667 35.801333 350.917914 
 127.218778 35.801333 345.021926 
 127.219000 35.801333 338.811057 
 127.219222 35.801333 334.298879 
 127.219333 35.801333 329.205110 
 127.219444 35.801333 328.422358 
 127.219556 35.801333 332.451266 
 127.218444 35.801444 371.886308 
 127.218556 35.801444 365.002154 
 127.218667 35.801444 354.475934 
 127.218778 35.801444 350.746510 
 127.219000 35.801444 340.682412 
 127.219222 35.801444 334.686624 
 127.219333 35.801444 330.583441 
 127.219444 35.801444 331.701747 
 127.219556 35.801444 338.537335 
 127.218444 35.801556 371.634722 
 127.218556 35.801556 366.632184 
 127.218667 35.801556 361.998239 
 127.218778 35.801556 361.363255 
 127.219000 35.801556 345.831917 
 127.219222 35.801556 336.255868 
 127.219333 35.801556 333.731784 
 127.219444 35.801556 337.614095 
 127.219556 35.801556 347.185408 
 127.218556 35.801556 366.632184 
 127.218667 35.801556 361.998239 
 127.218778 35.801556 361.363255 
 127.218889 35.801556 357.515650 
 127.219111 35.801556 339.749825 
 127.219333 35.801556 333.731784 
 127.219444 35.801556 337.614095 
 127.219556 35.801556 347.185408 
 127.219667 35.801556 359.446602 
 127.218556 35.801667 371.083347 
 127.218667 35.801667 373.176288 
 127.218778 35.801667 374.655080 
 127.218889 35.801667 371.560901 
 127.219111 35.801667 346.395527 
 127.219333 35.801667 339.821406 
 127.219444 35.801667 346.501371 
 127.219556 35.801667 356.577675 
 127.219667 35.801667 365.173045 
 127.218556 35.801778 378.808475 
 127.218667 35.801778 383.710703 
 127.218778 35.801778 385.474621 
 127.218889 35.801778 384.951104 
 127.219111 35.801778 362.289277 
 127.219333 35.801778 349.458694 
 127.219444 35.801778 356.487291 
 127.219556 35.801778 363.930017 
 127.219667 35.801778 367.954489 
 127.218556 35.801889 386.767648 
 127.218667 35.801889 390.426055 
 127.218778 35.801889 391.934476 
 127.218889 35.801889 394.335503 
 127.219111 35.801889 385.917130 
 127.219333 35.801889 360.858493 
 127.219444 35.801889 364.476041 
 127.219556 35.801889 368.178174 
 127.219667 35.801889 368.531694 
 127.218667 35.801889 390.426055 
 127.218778 35.801889 391.934476 
 127.218889 35.801889 394.335503 
 127.219000 35.801889 395.023600 
 127.219222 35.801889 369.987162 
 127.219444 35.801889 364.476041 
 127.219556 35.801889 368.178174 
 127.219667 35.801889 368.531694 
 127.219778 35.801889 365.406694 
 127.218667 35.802000 393.838678 
 127.218778 35.802000 395.410328 
 127.218889 35.802000 400.307495 
 127.219000 35.802000 406.569676 
 127.219222 35.802000 389.908111 
 127.219444 35.802000 369.420420 
 127.219556 35.802000 370.148495 
 127.219667 35.802000 367.925013 
 127.219778 35.802000 364.219713 
 127.218667 35.802111 395.515955 
 127.218778 35.802111 397.610786 
 127.218889 35.802111 404.566526 
 127.219000 35.802111 411.947183 
 127.219222 35.802111 402.559762 
 127.219444 35.802111 372.843655 
 127.219556 35.802111 371.238611 
 127.219667 35.802111 367.019087 
 127.219778 35.802111 363.522532 
 127.218778 35.802111 397.610786 
 127.218889 35.802111 404.566526 
 127.219000 35.802111 411.947183 
 127.219111 35.802111 412.059398 
 127.219333 35.802111 378.836040 
 127.219556 35.802111 371.238611 
 127.219667 35.802111 367.019087 
 127.219778 35.802111 363.522532 
 127.219889 35.802111 363.584632 
 127.218778 35.802222 399.595261 
 127.218889 35.802222 408.015978 
 127.219000 35.802222 414.195227 
 127.219111 35.802222 414.507528 
 127.219333 35.802222 386.607628 
 127.219556 35.802222 372.935002 
 127.219667 35.802222 366.510732 
 127.219778 35.802222 363.365492 
 127.219889 35.802222 364.697013 
 127.218778 35.802333 401.953129 
 127.218889 35.802333 410.819521 
 127.219000 35.802333 414.922929 
 127.219111 35.802333 414.417464 
 127.219333 35.802333 394.996995 
 127.219556 35.802333 377.120009 
 127.219667 35.802333 367.044611 
 127.219778 35.802333 363.847758 
 127.219889 35.802333 366.749506 
 127.218889 35.802333 410.819521 
 127.219000 35.802333 414.922929 
 127.219111 35.802333 414.417464 
 127.219222 35.802333 409.744011 
 127.219444 35.802333 385.110548 
 127.219667 35.802333 367.044611 
 127.219778 35.802333 363.847758 
 127.219889 35.802333 366.749506 
 127.220000 35.802333 374.032936 
 127.218889 35.802445 412.774142
[truncated: 1,105,710 more chars]
