# Supplementary material for: Terrain Referenced Navigation Using a Multilayer Radial Basis Function-Based Extreme Learning Machine
Source: Hindawi journal article supplement (doi:10.1155/2019/9142694), 2019-07-11
Supplement: f1 [file 9142694.f1.zip › 9142694_Supplementary information files/CompareMatchingResults_180909/BLTestResult.dat]

127.174444 35.700556 408.000000 127.174444 35.700556 411.000000 
 127.174444 35.700667 410.000000 127.174444 35.700667 415.000000 
 127.174444 35.700778 413.000000 127.174444 35.700778 419.000000 
 127.174556 35.700778 409.000000 127.174556 35.700778 415.000000 
 127.174556 35.700889 410.000000 127.174556 35.700889 423.000000 
 127.174556 35.701000 419.000000 127.174556 35.701000 427.000000 
 127.174556 35.701111 425.000000 127.174556 35.701111 432.000000 
 127.174667 35.701111 420.000000 127.174667 35.701111 429.000000 
 127.174667 35.701222 424.000000 127.174667 35.701222 430.000000 
 127.174667 35.701333 424.000000 127.174667 35.701333 430.000000 
 127.174667 35.701444 423.000000 127.174667 35.701444 428.000000 
 127.174778 35.701444 416.000000 127.174778 35.701444 422.000000 
 127.174778 35.701556 415.000000 127.174778 35.701556 421.000000 
 127.174778 35.701667 414.000000 127.174778 35.701667 420.000000 
 127.174778 35.701778 413.000000 127.174778 35.701778 420.000000 
 127.174889 35.701889 407.000000 127.174889 35.701889 414.000000 
 127.174889 35.702000 408.000000 127.174889 35.702000 412.000000 
 127.174889 35.702111 407.000000 127.174889 35.702111 408.000000 
 127.174889 35.702222 405.000000 127.174889 35.702222 407.000000 
 127.175000 35.702222 398.000000 127.175000 35.702222 402.000000 
 127.175000 35.702333 396.000000 127.175000 35.702333 400.000000 
 127.175000 35.702444 397.000000 127.175000 35.702444 405.000000 
 127.175000 35.702556 402.000000 127.175000 35.702556 410.000000 
 127.175111 35.702556 401.000000 127.175111 35.702556 410.000000 
 127.175111 35.702667 409.000000 127.175111 35.702667 413.000000 
 127.175111 35.702778 413.000000 127.175111 35.702778 414.000000 
 127.175111 35.702889 415.000000 127.175111 35.702889 413.000000 
 127.175222 35.702889 416.000000 127.175222 35.702889 415.000000 
 127.175222 35.703000 416.000000 127.175222 35.703000 415.000000 
 127.175222 35.703111 415.000000 127.175222 35.703111 413.000000 
 127.175222 35.703222 412.000000 127.175222 35.703222 410.000000 
 127.175333 35.703222 408.000000 127.175333 35.703222 410.000000 
 127.175333 35.703333 405.000000 127.175333 35.703333 406.000000 
 127.175333 35.703444 399.000000 127.175333 35.703444 401.000000 
 127.175333 35.703556 395.000000 127.175333 35.703556 395.000000 
 127.175444 35.703556 391.000000 127.175444 35.703556 390.000000 
 127.175444 35.703667 386.000000 127.175444 35.703667 385.000000 
 127.175444 35.703778 381.000000 127.175444 35.703778 377.000000 
 127.175444 35.703889 373.000000 127.175444 35.703889 373.000000 
 127.175556 35.703889 371.000000 127.175556 35.703889 370.000000 
 127.175556 35.704000 367.000000 127.175556 35.704000 366.000000 
 127.175556 35.704111 362.000000 127.175556 35.704111 364.000000 
 127.175556 35.704222 359.000000 127.175556 35.704222 360.000000 
 127.175667 35.704222 355.000000 127.175667 35.704222 354.000000 
 127.175667 35.704333 350.000000 127.175667 35.704333 356.000000 
 127.175667 35.704444 354.000000 127.175667 35.704444 366.000000 
 127.175667 35.704556 364.000000 127.175667 35.704556 373.000000 
 127.175778 35.704556 363.000000 127.175778 35.704556 371.000000 
 127.175778 35.704667 368.000000 127.175778 35.704667 376.000000 
 127.175778 35.704778 373.000000 127.175778 35.704778 375.000000 
 127.175778 35.704889 373.000000 127.175778 35.704889 369.000000 
 127.175889 35.704889 369.000000 127.175889 35.704889 367.000000 
 127.175889 35.705000 365.000000 127.175889 35.705000 358.000000 
 127.175889 35.705111 357.000000 127.175889 35.705111 352.000000 
 127.175889 35.705222 350.000000 127.175889 35.705222 343.000000 
 127.176000 35.705222 349.000000 127.176000 35.705222 341.000000 
 127.176000 35.705333 340.000000 127.176000 35.705333 336.000000 
 127.176000 35.705444 335.000000 127.176000 35.705444 337.000000 
 127.176000 35.705556 334.000000 127.176000 35.705556 344.000000 
 127.176111 35.705556 330.000000 127.176111 35.705556 340.000000 
 127.176111 35.705667 335.000000 127.176111 35.705667 347.000000 
 127.176111 35.705778 342.000000 127.176111 35.705778 351.000000 
 127.176111 35.705889 346.000000 127.176111 35.705889 353.000000 
 127.176222 35.705889 339.000000 127.176222 35.705889 348.000000 
 127.176222 35.706000 342.000000 127.176222 35.706000 347.000000 
 127.176222 35.706111 341.000000 127.176222 35.706111 341.000000 
 127.176222 35.706222 336.000000 127.176222 35.706222 336.000000 
 127.176333 35.706222 331.000000 127.176333 35.706222 332.000000 
 127.176333 35.706333 327.000000 127.176333 35.706333 328.000000 
 127.176333 35.706444 323.000000 127.176333 35.706444 328.000000 
 127.176333 35.706556 327.000000 127.176333 35.706556 335.000000 
 127.176444 35.706556 327.000000 127.176444 35.706556 333.000000 
 127.176444 35.706667 332.000000 127.176444 35.706667 338.000000 
 127.176444 35.706778 336.000000 127.176444 35.706778 338.000000 
 127.176444 35.706889 336.000000 127.176444 35.706889 335.000000 
 127.176556 35.706889 333.000000 127.176556 35.706889 333.000000 
 127.176556 35.707000 331.000000 127.176556 35.707000 331.000000 
 127.176556 35.707111 327.000000 127.176556 35.707111 329.000000 
 127.176556 35.707222 325.000000 127.176556 35.707222 333.000000 
 127.176667 35.707222 322.000000 127.176667 35.707222 331.000000 
 127.176667 35.707333 329.000000 127.176667 35.707333 340.000000 
 127.176667 35.707444 340.000000 127.176667 35.707444 345.000000 
 127.176667 35.707556 346.000000 127.176667 35.707556 355.000000 
 127.176778 35.707556 346.000000 127.176778 35.707556 356.000000 
 127.176778 35.707667 356.000000 127.176778 35.707667 362.000000 
 127.176778 35.707778 361.000000 127.176778 35.707778 369.000000 
 127.176778 35.707889 367.000000 127.176778 35.707889 372.000000 
 127.176889 35.707889 363.000000 127.176889 35.707889 368.000000 
 127.176889 35.708000 365.000000 127.176889 35.708000 368.000000 
 127.176889 35.708111 364.000000 127.176889 35.708111 362.000000 
 127.176889 35.708222 359.000000 127.176889 35.708222 355.000000 
 127.177000 35.708222 356.000000 127.177000 35.708222 353.000000 
 127.177000 35.708333 351.000000 127.177000 35.708333 340.000000 
 127.177000 35.708444 337.000000 127.177000 35.708444 335.000000 
 127.177111 35.708444 336.000000 127.177111 35.708444 332.000000 
 127.177111 35.708556 330.000000 127.177111 35.708556 335.000000 
 127.177111 35.708667 328.000000 127.177111 35.708667 340.000000 
 127.177111 35.708778 333.000000 127.177111 35.708778 347.000000 
 127.177222 35.708778 325.000000 127.177222 35.708778 339.000000 
 127.177222 35.708889 332.000000 127.177222 35.708889 343.000000 
 127.177222 35.709000 335.000000 127.177222 35.709000 347.000000 
 127.177222 35.709111 339.000000 127.177222 35.709111 350.000000 
 127.177333 35.709111 332.000000 127.177333 35.709111 343.000000 
 127.177333 35.709222 336.000000 127.177333 35.709222 347.000000 
 127.177333 35.709333 341.000000 127.177333 35.709333 347.000000 
 127.177333 35.709444 342.000000 127.177333 35.709444 345.000000 
 127.177444 35.709444 336.000000 127.177444 35.709444 340.000000 
 127.177444 35.709556 335.000000 127.177444 35.709556 339.000000 
 127.177444 35.709667 333.000000 127.177444 35.709667 338.000000 
 127.177444 35.709778 333.000000 127.177444 35.709778 338.000000 
 127.177556 35.709778 327.000000 127.177556 35.709778 333.000000 
 127.177556 35.709889 328.000000 127.177556 35.709889 334.000000 
 127.177556 35.710000 329.000000 127.177556 35.710000 337.000000 
 127.177556 35.710111 333.000000 127.177556 35.710111 340.000000 
 127.177667 35.710111 328.000000 127.177667 35.710111 335.000000 
 127.177667 35.710222 332.000000 127.177667 35.710222 341.000000 
 127.177667 35.710333 338.000000 127.177667 35.710333 344.000000 
 127.177667 35.710444 343.000000 127.177667 35.710444 342.000000 
 127.177778 35.710444 342.000000 127.177778 35.710444 341.000000 
 127.177778 35.710556 341.000000 127.177778 35.710556 337.000000 
 127.177778 35.710667 338.000000 127.177778 35.710667 331.000000 
 127.177778 35.710778 331.000000 127.177778 35.710778 323.000000 
 127.177889 35.710778 331.000000 127.177889 35.710778 323.000000 
 127.177889 35.710889 324.000000 127.177889 35.710889 310.000000 
 127.177889 35.711000 310.000000 127.177889 35.711000 304.000000 
 127.178000 35.711111 306.000000 127.178000 35.711111 297.000000 
 127.178000 35.711222 295.000000 127.178000 35.711222 297.000000 
 127.178000 35.711333 293.000000 127.178000 35.711333 299.000000 
 127.178111 35.711333 290.000000 127.178111 35.711333 296.000000 
 127.178111 35.711444 291.000000 127.178111 35.711444 301.000000 
 127.178111 35.711556 297.000000 127.178111 35.711556 306.000000 
 127.178111 35.711667 302.000000 127.178111 35.711667 314.000000 
 127.178222 35.711667 298.000000 127.178222 35.711667 309.000000 
 127.178222 35.711778 305.000000 127.178222 35.711778 314.000000 
 127.178222 35.711889 309.000000 127.178222 35.711889 319.000000 
 127.178222 35.712000 314.000000 127.178222 35.712000 321.000000 
 127.178333 35.712000 308.000000 127.178333 35.712000 315.000000 
 127.178333 35.712111 308.000000 127.178333 35.712111 313.000000 
 127.178333 35.712222 307.000000 127.178333 35.712222 310.000000 
 127.178333 35.712333 305.000000 127.178333 35.712333 305.000000 
 127.178444 35.712333 300.000000 127.178444 35.712333 301.000000 
 127.178444 35.712444 293.000000 127.178444 35.712444 296.000000 
 127.178444 35.712556 288.000000 127.178444 35.712556 288.000000 
 127.178444 35.712667 282.000000 127.178444 35.712667 283.000000 
 127.178556 35.712667 273.000000 127.178556 35.712667 278.000000 
 127.178556 35.712778 267.000000 127.178556 35.712778 266.000000 
 127.178556 35.712889 261.000000 127.178556 35.712889 262.000000 
 127.178667 35.712889 259.000000 127.178667 35.712889 259.000000 
 127.178667 35.713000 258.000000 127.178667 35.713000 258.000000 
 127.178667 35.713111 256.000000 127.178667 35.713111 255.000000 
 127.178667 35.713222 255.000000 127.178667 35.713222 255.000000 
 127.178778 35.713222 255.000000 127.178778 35.713222 255.000000 
 127.178778 35.713333 255.000000 127.178778 35.713333 255.000000 
 127.178778 35.713444 255.000000 127.178778 35.713444 254.000000 
 127.178778 35.713556 254.000000 127.178778 35.713556 254.000000 
 127.178889 35.713556 254.000000 127.178889 35.713556 254.000000 
 127.178889 35.713667 254.000000 127.178889 35.713667 254.000000 
 127.178889 35.713778 254.000000 127.178889 35.713778 254.000000 
 127.178889 35.713889 254.000000 127.178889 35.713889 253.000000 
 127.179000 35.713889 254.000000 127.179000 35.713889 254.000000 
 127.179000 35.714000 254.000000 127.179000 35.714000 253.000000 
 127.179000 35.714111 253.000000 127.179000 35.714111 252.000000 
 127.179111 35.714111 253.000000 127.179111 35.714111 253.000000 
 127.179111 35.714222 253.000000 127.179111 35.714222 253.000000 
 127.179111 35.714333 254.000000 127.179111 35.714333 253.000000 
 127.179111 35.714444 253.000000 127.179111 35.714444 253.000000 
 127.179222 35.714444 254.000000 127.179222 35.714444 253.000000 
 127.179222 35.714556 254.000000 127.179222 35.714556 253.000000 
 127.179222 35.714667 253.000000 127.179222 35.714667 253.000000 
 127.179222 35.714778 253.000000 127.179222 35.714778 251.000000 
 127.179333 35.714778 253.000000 127.179333 35.714778 251.000000 
 127.179333 35.714889 251.000000 127.179333 35.714889 250.000000 
 127.179333 35.715000 250.000000 127.179333 35.715000 250.000000 
 127.179444 35.715000 251.000000 127.179444 35.715000 250.000000 
 127.179444 35.715111 250.000000 127.179444 35.715111 250.000000 
 127.179444 35.715222 250.000000 127.179444 35.715222 250.000000 
 127.179444 35.715333 250.000000 127.179444 35.715333 250.000000 
 127.179556 35.715333 250.000000 127.179556 35.715333 250.000000 
 127.179556 35.715444 250.000000 127.179556 35.715444 250.000000 
 127.179556 35.715556 251.000000 127.179556 35.715556 251.000000 
 127.179556 35.715667 251.000000 127.179556 35.715667 251.000000 
 127.179667 35.715667 251.000000 127.179667 35.715667 251.000000 
 127.179667 35.715778 252.000000 127.179667 35.715778 251.000000 
 127.179667 35.715889 252.000000 127.179667 35.715889 252.000000 
 127.179778 35.715889 252.000000 127.179778 35.715889 252.000000 
 127.179778 35.716000 252.000000 127.179778 35.716000 253.000000 
 127.179778 35.716111 253.000000 127.179778 35.716111 254.000000 
 127.179778 35.716222 254.000000 127.179778 35.716222 254.000000 
 127.179889 35.716222 254.000000 127.179889 35.716222 254.000000 
 127.179889 35.716333 254.000000 127.179889 35.716333 254.000000 
 127.179889 35.716444 254.000000 127.179889 35.716444 256.000000 
 127.179889 35.716556 255.000000 127.179889 35.716556 257.000000 
 127.180000 35.716556 254.000000 127.180000 35.716556 257.000000 
 127.180000 35.716667 256.000000 127.180000 35.716667 259.000000 
 127.180000 35.716778 258.000000 127.180000 35.716778 261.000000 
 127.180111 35.716778 257.000000 127.180111 35.716778 260.000000 
 127.180111 35.716889 259.000000 127.180111 35.716889 261.000000 
 127.180111 35.717000 260.000000 127.180111 35.717000 263.000000 
 127.180111 35.717111 262.000000 127.180111 35.717111 264.000000 
 127.180222 35.717111 261.000000 127.180222 35.717111 263.000000 
 127.180222 35.717222 262.000000 127.180222 35.717222 263.000000 
 127.180222 35.717333 262.000000 127.180222 35.717333 264.000000 
 127.180222 35.717444 263.000000 127.180222 35.717444 264.000000 
 127.180333 35.717444 262.000000 127.180333 35.717444 263.000000 
 127.180333 35.717556 262.000000 127.180333 35.717556 264.000000 
 127.180333 35.717667 263.000000 127.180333 35.717667 265.000000 
 127.180444 35.717667 262.000000 127.180444 35.717667 264.000000 
 127.180444 35.717778 263.000000 127.180444 35.717778 266.000000 
 127.180444 35.717889 264.000000 127.180444 35.717889 266.000000 
 127.180444 35.718000 265.000000 127.180444 35.718000 267.000000 
 127.180556 35.718000 264.000000 127.180556 35.718000 266.000000 
 127.180556 35.718111 265.000000 127.180556 35.718111 267.000000 
 127.180556 35.718222 265.000000 127.180556 35.718222 267.000000 
 127.180667 35.718222 264.000000 127.180667 35.718222 265.000000 
 127.180667 35.718333 264.000000 127.180667 35.718333 266.000000 
 127.180667 35.718444 265.000000 127.180667 35.718444 267.000000 
 127.180667 35.718556 265.000000 127.180667 35.718556 268.000000 
 127.180778 35.718556 265.000000 127.180778 35.718556 267.000000 
 127.180778 35.718667 266.000000 127.180778 35.718667 268.000000 
 127.180778 35.718778 267.000000 127.180778 35.718778 268.000000 
 127.180889 35.718778 265.000000 127.180889 35.718778 267.000000 
 127.180889 35.718889 266.000000 127.180889 35.718889 268.000000 
 127.180889 35.719000 267.000000 127.180889 35.719000 268.000000 
 127.180889 35.719111 267.000000 127.180889 35.719111 269.000000 
 127.181000 35.719111 267.000000 127.181000 35.719111 268.000000 
 127.181000 35.719222 267.000000 127.181000 35.719222 269.000000 
 127.181000 35.719333 268.000000 127.181000 35.719333 270.000000 
 127.181111 35.719444 269.000000 127.181111 35.719444 270.000000 
 127.181111 35.719556 270.000000 127.181111 35.719556 271.000000 
 127.181111 35.719667 270.000000 127.181111 35.719667 272.000000 
 127.181222 35.719667 270.000000 127.181222 35.719667 271.000000 
 127.181222 35.719778 270.000000 127.181222 35.719778 272.000000 
 127.181222 35.719889 272.000000 127.181222 35.719889 273.000000 
 127.181333 35.720000 272.000000 127.181333 35.720000 274.000000 
 127.181333 35.720111 273.000000 127.181333 35.720111 274.000000 
 127.181333 35.720222 273.000000 127.181333 35.720222 275.000000 
 127.181444 35.720222 271.000000 127.181444 35.720222 275.000000 
 127.181444 35.720333 274.000000 127.181444 35.720333 274.000000 
 127.181444 35.720444 274.000000 127.181444 35.720444 275.000000 
 127.181444 35.720556 275.000000 127.181444 35.720556 275.000000 
 127.181556 35.720556 275.000000 127.181556 35.720556 275.000000 
 127.181556 35.720667 275.000000 127.181556 35.720667 276.000000 
 127.181556 35.720778 275.000000 127.181556 35.720778 278.000000 
 127.181667 35.720778 275.000000 127.181667 35.720778 276.000000 
 127.181667 35.720889 276.000000 127.181667 35.720889 278.000000 
 127.181667 35.721000 277.000000 127.181667 35.721000 280.000000 
 127.181778 35.721000 277.000000 127.181778 35.721000 278.000000 
 127.181778 35.721111 279.000000 127.181778 35.721111 280.000000 
 127.181778 35.721222 280.000000 127.181778 35.721222 280.000000 
 127.181778 35.721333 280.000000 127.181778 35.721333 281.000000 
 127.181889 35.721333 280.000000 127.181889 35.721333 280.000000 
 127.181889 35.721444 280.000000 127.181889 35.721444 281.000000 
 127.181889 35.721556 280.000000 127.181889 35.721556 281.000000 
 127.182000 35.721556 282.000000 127.182000 35.721556 280.000000 
 127.182000 35.721667 282.000000 127.182000 35.721667 283.000000 
 127.182000 35.721778 284.000000 127.182000 35.721778 284.000000 
 127.182000 35.721889 285.000000 127.182000 35.721889 285.000000 
 127.182111 35.721889 285.000000 127.182111 35.721889 286.000000 
 127.182111 35.722000 288.000000 127.182111 35.722000 286.000000 
 127.182111 35.722111 290.000000 127.182111 35.722111 290.000000 
 127.182222 35.722111 290.000000 127.182222 35.722111 290.000000 
 127.182222 35.722222 291.000000 127.182222 35.722222 290.000000 
 127.182222 35.722333 292.000000 127.182222 35.722333 290.000000 
 127.182222 35.722444 291.000000 127.182222 35.722444 292.000000 
 127.182333 35.722444 295.000000 127.182333 35.722444 291.000000 
 127.182333 35.722556 296.000000 127.182333 35.722556 295.000000 
 127.182333 35.722667 295.000000 127.182333 35.722667 297.000000 
 127.182444 35.722667 299.000000 127.182444 35.722667 295.000000 
 127.182444 35.722778 297.000000 127.182444 35.722778 297.000000 
 127.182444 35.722889 298.000000 127.182444 35.722889 300.000000 
 127.182444 35.723000 300.000000 127.182444 35.723000 300.000000 
 127.182556 35.723000 303.000000 127.182556 35.723000 300.000000 
 127.182556 35.723111 302.000000 127.182556 35.723111 300.000000 
 127.182556 35.723222 304.000000 127.182556 35.723222 302.000000 
 127.182667 35.723222 312.000000 127.182667 35.723222 309.000000 
 127.182667 35.723333 313.000000 127.182667 35.723333 311.000000 
 127.182667 35.723444 314.000000 127.182667 35.723444 311.000000 
 127.182778 35.723444 321.000000 127.182778 35.723444 316.000000 
 127.182778 35.723556 322.000000 127.182778 35.723556 319.000000 
 127.182778 35.723667 323.000000 127.182778 35.723667 320.000000 
 127.182778 35.723778 323.000000 127.182778 35.723778 322.000000 
 127.182889 35.723778 328.000000 127.182889 35.723778 324.000000 
 127.182889 35.723889 328.000000 127.182889 35.723889 325.000000 
 127.182889 35.724000 329.000000 127.182889 35.724000 327.000000 
 127.183000 35.724000 333.000000 127.183000 35.724000 331.000000 
 127.183000 35.724111 335.000000 127.183000 35.724111 331.000000 
 127.183000 35.724222 335.000000 127.183000 35.724222 331.000000 
 127.183111 35.724333 338.000000 127.183111 35.724333 334.000000 
 127.183111 35.724444 337.000000 127.183111 35.724444 332.000000 
 127.183111 35.724556 336.000000 127.183111 35.724556 332.000000 
 127.183222 35.724556 340.000000 127.183222 35.724556 335.000000 
 127.183222 35.724667 339.000000 127.183222 35.724667 334.000000 
 127.183222 35.724778 338.000000 127.183222 35.724778 334.000000 
 127.183333 35.724778 343.000000 127.183333 35.724778 338.000000 
 127.183333 35.724889 342.000000 127.183333 35.724889 338.000000 
 127.183333 35.725000 342.000000 127.183333 35.725000 342.000000 
 127.183333 35.725111 345.000000 127.183333 35.725111 344.000000 
 127.183444 35.725111 349.000000 127.183444 35.725111 348.000000 
 127.183444 35.725222 352.000000 127.183444 35.725222 350.000000 
 127.183444 35.725333 356.000000 127.183444 35.725333 353.000000 
 127.183556 35.725333 363.000000 127.183556 35.725333 359.000000 
 127.183556 35.725444 366.000000 127.183556 35.725444 362.000000 
 127.183556 35.725556 368.000000 127.183556 35.725556 361.000000 
 127.183667 35.725556 375.000000 127.183667 35.725556 369.000000 
 127.183667 35.725667 377.000000 127.183667 35.725667 371.000000 
 127.183667 35.725778 378.000000 127.183667 35.725778 372.000000 
 127.183667 35.725889 379.000000 127.183667 35.725889 373.000000 
 127.183778 35.725889 387.000000 127.183778 35.725889 381.000000 
 127.183778 35.726000 388.000000 127.183778 35.726000 382.000000 
 127.183778 35.726111 389.000000 127.183778 35.726111 383.000000 
 127.183889 35.726111 396.000000 127.183889 35.726111 390.000000 
 127.183889 35.726222 397.000000 127.183889 35.726222 391.000000 
 127.183889 35.726333 397.000000 127.183889 35.726333 392.000000 
 127.184000 35.726333 403.000000 127.184000 35.726333 398.000000 
 127.184000 35.726444 404.000000 127.184000 35.726444 398.000000 
 127.184000 35.726556 404.000000 127.184000 35.726556 399.000000 
 127.184000 35.726667 404.000000 127.184000 35.726667 399.000000 
 127.184111 35.726667 409.000000 127.184111 35.726667 405.000000 
 127.184111 35.726778 409.000000 127.184111 35.726778 406.000000 
 127.184111 35.726889 411.000000 127.184111 35.726889 408.000000 
 127.184222 35.726889 415.000000 127.184222 35.726889 413.000000 
 127.184222 35.727000 418.000000 127.184222 35.727000 414.000000 
 127.184222 35.727111 419.000000 127.184222 35.727111 416.000000 
 127.184333 35.727111 425.000000 127.184333 35.727111 421.000000 
 127.184333 35.727222 427.000000 127.184333 35.727222 422.000000 
 127.184333 35.727333 429.000000 127.184333 35.727333 423.000000 
 127.184444 35.727333 435.000000 127.184444 35.727333 430.000000 
 127.184444 35.727444 436.000000 127.184444 35.727444 430.000000 
 127.184444 35.727556 437.000000 127.184444 35.727556 432.000000 
 127.184444 35.727667 438.000000 127.184444 35.727667 433.000000 
 127.184556 35.727667 445.000000 127.184556 35.727667 438.000000 
 127.184556 35.727778 445.000000 127.184556 35.727778 439.000000 
 127.184556 35.727889 445.000000 127.184556 35.727889 439.000000 
 127.184667 35.727889 453.000000 127.184667 35.727889 446.000000 
 127.184667 35.728000 453.000000 127.184667 35.728000 446.000000 
 127.184667 35.728111 453.000000 127.184667 35.728111 445.000000 
 127.184778 35.728111 463.000000 127.184778 35.728111 454.000000 
 127.184778 35.728222 464.000000 127.184778 35.728222 454.000000 
 127.184778 35.728333 465.000000 127.184778 35.728333 456.000000 
 127.184778 35.728444 467.000000 127.184778 35.728444 459.000000 
 127.184889 35.728444 477.000000 127.184889 35.728444 468.000000 
 127.184889 35.728556 478.000000 127.184889 35.728556 472.000000 
 127.184889 35.728667 480.000000 127.184889 35.728667 478.000000 
 127.185000 35.728667 489.000000 127.185000 35.728667 481.000000 
 127.185000 35.728778 491.000000 127.185000 35.728778 489.000000 
 127.185000 35.728889 493.000000 127.185000 35.728889 496.000000 
 127.185111 35.728889 500.000000 127.185111 35.728889 497.000000 
 127.185111 35.729000 501.000000 127.185111 35.729000 507.000000 
 127.185111 35.729111 507.000000 127.185111 35.729111 514.000000 
 127.185222 35.729111 510.000000 127.185222 35.729111 514.000000 
 127.185222 35.729222 514.000000 127.185222 35.729222 526.000000 
 127.185222 35.729333 526.000000 127.185222 35.729333 530.000000 
 127.185222 35.729444 531.000000 127.185222 35.729444 536.000000 
 127.185333 35.729444 532.000000 127.185333 35.729444 538.000000 
 127.185333 35.729556 540.000000 127.185333 35.729556 542.000000 
 127.185333 35.729667 546.000000 127.185333 35.729667 545.000000 
 127.185444 35.729667 550.000000 127.185444 35.729667 549.000000 
 127.185444 35.729778 552.000000 127.185444 35.729778 548.000000 
 127.185444 35.729889 552.000000 127.185444 35.729889 547.000000 
 127.185556 35.729889 556.000000 127.185556 35.729889 551.000000 
 127.185556 35.730000 555.000000 127.185556 35.730000 548.000000 
 127.185556 35.730111 552.000000 127.185556 35.730111 546.000000 
 127.185667 35.730111 554.000000 127.185667 35.730111 550.000000 
 127.185667 35.730222 552.000000 127.185667 35.730222 544.000000 
 127.185667 35.730333 545.000000 127.185667 35.730333 539.000000 
 127.185667 35.730444 539.000000 127.185667 35.730444 532.000000 
 127.185778 35.730444 538.000000 127.185778 35.730444 531.000000 
 127.185778 35.730556 529.000000 127.185778 35.730556 526.000000 
 127.185778 35.730667 524.000000 127.185778 35.730667 518.000000 
 127.185889 35.730667 521.000000 127.185889 35.730667 514.000000 
 127.185889 35.730778 510.000000 127.185889 35.730778 507.000000 
 127.185889 35.730889 503.000000 127.185889 35.730889 498.000000 
 127.186000 35.730889 499.000000 127.186000 35.730889 495.000000 
 127.186000 35.731000 492.000000 127.186000 35.731000 491.000000 
 127.186000 35.731111 487.000000 127.186000 35.731111 484.000000 
 127.186111 35.731111 484.000000 127.186111 35.731111 480.000000 
 127.186111 35.731222 477.000000 127.186111 35.731222 475.000000 
 127.186111 35.731333 473.000000 127.186111 35.731333 470.000000 
 127.186222 35.731333 471.000000 127.186222 35.731333 468.000000 
 127.186222 35.731444 465.000000 127.186222 35.731444 464.000000 
 127.186222 35.731556 462.000000 127.186222 35.731556 460.000000 
 127.186222 35.731667 459.000000 127.186222 35.731667 455.000000 
 127.186333 35.731667 459.000000 127.186333 35.731667 454.000000 
 127.186333 35.731778 456.000000 127.186333 35.731778 450.000000 
 127.186333 35.731889 455.000000 127.186333 35.731889 448.000000 
 127.186444 35.731889 460.000000 127.186444 35.731889 453.000000 
 127.186444 35.732000 459.000000 127.186444 35.732000 452.000000 
 127.186444 35.732111 458.000000 127.186444 35.732111 450.000000 
 127.186556 35.732111 465.000000 127.186556 35.732111 457.000000 
 127.186556 35.732222 464.000000 127.186556 35.732222 455.000000 
 127.186556 35.732333 462.000000 127.186556 35.732333 453.000000 
 127.186667 35.732333 469.000000 127.186667 35.732333 459.000000 
 127.186667 35.732444 465.000000 127.186667 35.732444 456.000000 
 127.186667 35.732556 461.000000 127.186667 35.732556 451.000000 
 127.186778 35.732556 467.000000 127.186778 35.732556 456.000000 
 127.186778 35.732667 461.000000 127.186778 35.732667 452.000000 
 127.186778 35.732778 458.000000 127.186778 35.732778 448.000000 
 127.186889 35.732889 459.000000 127.186889 35.732889 451.000000 
 127.186889 35.733000 457.000000 127.186889 35.733000 454.000000 
 127.186889 35.733111 458.000000 127.186889 35.733111 455.000000 
 127.187000 35.733111 461.000000 127.187000 35.733111 459.000000 
 127.187000 35.733222 463.000000 127.187000 35.733222 462.000000 
 127.187000 35.733333 467.000000 127.187000 35.733333 465.000000 
 127.187111 35.733333 471.000000 127.187111 35.733333 469.000000 
 127.187111 35.733444 474.000000 127.187111 35.733444 472.000000 
 127.187111 35.733556 476.000000 127.187111 35.733556 474.000000 
 127.187222 35.733556 479.000000 127.187222 35.733556 478.000000 
 127.187222 35.733667 483.000000 127.187222 35.733667 478.000000 
 127.187222 35.733778 484.000000 127.187222 35.733778 480.000000 
 127.187333 35.733778 490.000000 127.187333 35.733778 486.000000 
 127.187333 35.733889 492.000000 127.187333 35.733889 488.000000 
 127.187333 35.734000 493.000000 127.187333 35.734000 490.000000 
 127.187444 35.734000 499.000000 127.187444 35.734000 495.000000 
 127.187444 35.734111 500.000000 127.187444 35.734111 496.000000 
 127.187444 35.734222 501.000000 127.187444 35.734222 501.000000 
 127.187556 35.734222 505.000000 127.187556 35.734222 505.000000 
 127.187556 35.734333 505.000000 127.187556 35.734333 505.000000 
 127.187556 35.734444 505.000000 127.187556 35.734444 510.000000 
 127.187556 35.734556 505.000000 127.187556 35.734556 513.000000 
 127.187667 35.734556 496.000000 127.187667 35.734556 505.000000 
 127.187667 35.734667 497.000000 127.187667 35.734667 506.000000 
 127.187667 35.734778 497.000000 127.187667 35.734778 504.000000 
 127.187778 35.734778 488.000000 127.187778 35.734778 494.000000 
 127.187778 35.734889 485.000000 127.187778 35.734889 487.000000 
 127.187778 35.735000 478.000000 127.187778 35.735000 480.000000 
 127.187889 35.735000 468.000000 127.187889 35.735000 471.000000 
 127.187889 35.735111 461.000000 127.187889 35.735111 462.000000 
 127.187889 35.735222 453.000000 127.187889 35.735222 448.000000 
 127.188000 35.735222 444.000000 127.188000 35.735222 440.000000 
 127.188000 35.735333 433.000000 127.188000 35.735333 434.000000 
 127.188000 35.735444 425.000000 127.188000 35.735444 426.000000 
 127.188111 35.735444 419.000000 127.188111 35.735444 419.000000 
 127.188111 35.735556 413.000000 127.188111 35.735556 416.000000 
 127.188111 35.735667 410.000000 127.188111 35.735667 412.000000 
 127.188222 35.735667 402.000000 127.188222 35.735667 405.000000 
 127.188222 35.735778 398.000000 127.188222 35.735778 404.000000 
 127.188222 35.735889 398.000000 127.188222 35.735889 411.000000 
 127.188333 35.735889 394.000000 127.188333 35.735889 408.000000 
 127.188333 35.736000 405.000000 127.188333 35.736000 414.000000 
 127.188333 35.736111 411.000000 127.188333 35.736111 423.000000 
 127.188333 35.736222 421.000000 127.188333 35.736222 429.000000 
 127.188444 35.736222 418.000000 127.188444 35.736222 427.000000 
 127.188444 35.736333 424.000000 127.188444 35.736333 429.000000 
 127.188444 35.736444 423.000000 127.188444 35.736444 427.000000 
 127.188556 35.736444 415.000000 127.188556 35.736444 419.000000 
 127.188556 35.736556 410.000000 127.188556 35.736556 415.000000 
 127.188556 35.736667 405.000000 127.188556 35.736667 415.000000 
 127.188667 35.736667 396.000000 127.188667 35.736667 405.000000 
 127.188667 35.736778 397.000000 127.188667 35.736778 408.000000 
 127.188667 35.736889 401.000000 127.188667 35.736889 416.000000 
 127.188778 35.736889 398.000000 127.188778 35.736889 414.000000 
 127.188778 35.737000 412.000000 127.188778 35.737000 423.000000 
 127.188778 35.737111 421.000000 127.188778 35.737111 437.000000 
 127.188889 35.737111 419.000000 127.188889 35.737111 436.000000 
 127.188889 35.737222 433.000000 127.188889 35.737222 448.000000 
 127.188889 35.737333 443.000000 127.188889 35.737333 459.000000 
 127.189000 35.737333 439.000000 127.189000 35.737333 455.000000 
 127.189000 35.737444 450.000000 127.189000 35.737444 462.000000 
 127.189000 35.737556 458.000000 127.189000 35.737556 468.000000 
 127.189111 35.737556 454.000000 127.189111 35.737556 462.000000 
 127.189111 35.737667 456.000000 127.189111 35.737667 459.000000 
 127.189111 35.737778 453.000000 127.189111 35.737778 453.000000 
 127.189222 35.737778 447.000000 127.189222 35.737778 446.000000 
 127.189222 35.737889 437.000000 127.189222 35.737889 439.000000 
 127.189222 35.738000 430.000000 127.189222 35.738000 428.000000 
 127.189333 35.738111 410.000000 127.189333 35.738111 415.000000 
 127.189333 35.738222 405.000000 127.189333 35.738222 414.000000 
 127.189333 35.738333 407.000000 127.189333 35.738333 417.000000 
 127.189444 35.738333 400.000000 127.189444 35.738333 411.000000 
 127.189444 35.738444 405.000000 127.189444 35.738444 417.000000 
 127.189444 35.738556 411.000000 127.189444 35.738556 427.000000 
 127.189556 35.738556 406.000000 127.189556 35.738556 422.000000 
 127.189556 35.738667 418.000000 127.189556 35.738667 433.000000 
 127.189556 35.738778 427.000000 127.189556 35.738778 452.000000 
 127.189667 35.738778 422.000000 127.189667 35.738778 446.000000 
 127.189667 35.738889 438.000000 127.189667 35.738889 452.000000 
 127.189667 35.739000 440.000000 127.189667 35.739000 449.000000 
 127.189778 35.739000 428.000000 127.189778 35.739000 438.000000 
 127.189778 35.739111 428.000000 127.189778 35.739111 438.000000 
 127.189778 35.739222 430.000000 127.189778 35.739222 442.000000 
 127.189889 35.739222 421.000000 127.189889 35.739222 434.000000 
 127.189889 35.739333 426.000000 127.189889 35.739333 437.000000 
 127.189889 35.739444 429.000000 127.189889 35.739444 442.000000 
 127.190000 35.739444 421.000000 127.190000 35.739444 434.000000 
 127.190000 35.739556 426.000000 127.190000 35.739556 437.000000 
 127.190000 35.739667 430.000000 127.190000 35.739667 443.000000 
 127.190111 35.739667 423.000000 127.190111 35.739667 436.000000 
 127.190111 35.739778 430.000000 127.190111 35.739778 442.000000 
 127.190111 35.739889 436.000000 127.190111 35.739889 449.000000 
 127.190222 35.739889 431.000000 127.190222 35.739889 443.000000 
 127.190222 35.740000 438.000000 127.190222 35.740000 448.000000 
 127.190222 35.740111 442.000000 127.190222 35.740111 454.000000 
 127.190333 35.740111 436.000000 127.190333 35.740111 447.000000 
 127.190333 35.740222 440.000000 127.190333 35.740222 456.000000 
 127.190333 35.740333 448.000000 127.190333 35.740333 465.000000 
 127.190444 35.740333 441.000000 127.190444 35.740333 454.000000 
 127.190444 35.740444 445.000000 127.190444 35.740444 474.000000 
 127.190444 35.740556 460.000000 127.190444 35.740556 501.000000 
 127.190556 35.740556 447.000000 127.190556 35.740556 481.000000 
 127.190556 35.740667 467.000000 127.190556 35.740667 507.000000 
 127.190556 35.740778 492.000000 127.190556 35.740778 515.000000 
 127.190556 35.740889 499.000000 127.190556 35.740889 513.000000 
 127.190667 35.740889 485.000000 127.190667 35.740889 498.000000 
 127.190667 35.741000 485.000000 127.190667 35.741000 496.000000 
 127.190667 35.741111 484.000000 127.190667 35.741111 495.000000 
 127.190778 35.741111 472.000000 127.190778 35.741111 482.000000 
 127.190778 35.741222 471.000000 127.190778 35.741222 485.000000 
 127.190778 35.741333 474.000000 127.190778 35.741333 494.000000 
 127.190889 35.741333 469.000000 127.190889 35.741333 487.000000 
 127.190889 35.741444 480.000000 127.190889 35.741444 494.000000 
 127.190889 35.741556 487.000000 127.190889 35.741556 505.000000 
 127.191000 35.741556 480.000000 127.191000 35.741556 495.000000 
 127.191000 35.741667 485.000000 127.191000 35.741667 498.000000 
 127.191000 35.741778 488.000000 127.191000 35.741778 500.000000 
 127.191111 35.741778 478.000000 127.191111 35.741778 490.000000 
 127.191111 35.741889 482.000000 127.191111 35.741889 496.000000 
 127.191111 35.742000 488.000000 127.191111 35.742000 502.000000 
 127.191222 35.742000 480.000000 127.191222 35.742000 494.000000 
 127.191222 35.742111 488.000000 127.191222 35.742111 503.000000 
 127.191222 35.742222 499.000000 127.191222 35.742222 511.000000 
 127.191333 35.742222 497.000000 127.191333 35.742222 506.000000 
 127.191333 35.742333 503.000000 127.191333 35.742333 512.000000 
 127.191333 35.742444 511.000000 127.191333 35.742444 511.000000 
 127.191444 35.742444 508.000000 127.191444 35.742444 510.000000 
 127.191444 35.742556 510.000000 127.191444 35.742556 507.000000 
 127.191444 35.742667 507.000000 127.191444 35.742667 503.000000 
 127.191556 35.742667 506.000000 127.191556 35.742667 504.000000 
 127.191556 35.742778 504.000000 127.191556 35.742778 496.000000 
 127.191556 35.742889 497.000000 127.191556 35.742889 490.000000 
 127.191667 35.742889 498.000000 127.191667 35.742889 492.000000 
 127.191667 35.743000 493.000000 127.191667 35.743000 486.000000 
 127.191667 35.743111 487.000000 127.191667 35.743111 484.000000 
 127.191778 35.743111 488.000000 127.191778 35.743111 485.000000 
 127.191778 35.743222 485.000000 127.191778 35.743222 480.000000 
 127.191778 35.743333 481.000000 127.191778 35.743333 476.000000 
 127.191889 35.743333 482.000000 127.191889 35.743333 477.000000 
 127.191889 35.743444 478.000000 127.191889 35.743444 468.000000 
 127.191889 35.743556 470.000000 127.191889 35.743556 462.000000 
 127.192000 35.743556 472.000000 127.192000 35.743556 464.000000 
 127.192000 35.743667 466.000000 127.192000 35.743667 458.000000 
 127.192000 35.743778 461.000000 127.192000 35.743778 449.000000 
 127.192111 35.743778 464.000000 127.192111 35.743778 453.000000 
 127.192111 35.743889 456.000000 127.192111 35.743889 447.000000 
 127.192111 35.744000 451.000000 127.192111 35.744000 439.000000 
 127.192222 35.744000 454.000000 127.192222 35.744000 443.000000 
 127.192222 35.744111 447.000000 127.192222 35.744111 438.000000 
 127.192222 35.744222 442.000000 127.192222 35.744222 432.000000 
 127.192333 35.744222 446.000000 127.192333 35.744222 436.000000 
 127.192333 35.744333 441.000000 127.192333 35.744333 434.000000 
 127.192333 35.744444 440.000000 127.192333 35.744444 433.000000 
 127.192444 35.744444 447.000000 127.192444 35.744444 440.000000 
 127.192444 35.744556 447.000000 127.192444 35.744556 441.000000 
 127.192444 35.744667 448.000000 127.192444 35.744667 441.000000 
 127.192556 35.744778 451.000000 127.192556 35.744778 449.000000 
 127.192556 35.744889 451.000000 127.192556 35.744889 449.000000 
 127.192556 35.745000 452.000000 127.192556 35.745000 449.000000 
 127.192667 35.745000 454.000000 127.192667 35.745000 452.000000 
 127.192667 35.745111 454.000000 127.192667 35.745111 452.000000 
 127.192667 35.745222 456.000000 127.192667 35.745222 453.000000 
 127.192778 35.745222 462.000000 127.192778 35.745222 458.000000 
 127.192778 35.745333 464.000000 127.192778 35.745333 460.000000 
 127.192778 35.745444 465.000000 127.192778 35.745444 463.000000 
 127.192889 35.745444 469.000000 127.192889 35.745444 467.000000 
 127.192889 35.745556 470.000000 127.192889 35.745556 469.000000 
 127.192889 35.745667 470.000000 127.192889 35.745667 471.000000 
 127.193000 35.745667 470.000000 127.193000 35.745667 470.000000 
 127.193000 35.745778 467.000000 127.193000 35.745778 472.000000 
 127.193000 35.745889 466.000000 127.193000 35.745889 476.000000 
 127.193111 35.745889 455.000000 127.193111 35.745889 469.000000 
 127.193111 35.746000 460.000000 127.193111 35.746000 475.000000 
 127.193111 35.746111 466.000000 127.193111 35.746111 479.000000 
 127.193222 35.746111 456.000000 127.193222 35.746111 475.000000 
 127.193222 35.746222 463.000000 127.193222 35.746222 476.000000 
 127.193222 35.746333 467.000000 127.193222 35.746333 477.000000 
 127.193333 35.746333 457.000000 127.193333 35.746333 468.000000 
 127.193333 35.746444 458.000000 127.193333 35.746444 468.000000 
 127.193333 35.746556 457.000000 127.193333 35.746556 469.000000 
 127.193444 35.746556 448.000000 127.193444 35.746556 457.000000 
 127.193444 35.746667 446.000000 127.193444 35.746667 456.000000 
 127.193444 35.746778 445.000000 127.193444 35.746778 456.000000 
 127.193556 35.746778 435.000000 127.193556 35.746778 444.000000 
 127.193556 35.746889 434.000000 127.193556 35.746889 445.000000 
 127.193556 35.747000 435.000000 127.193556 35.747000 446.000000 
 127.193667 35.747000 426.000000 127.193667 35.747000 438.000000 
 127.193667 35.747111 432.000000 127.193667 35.747111 449.000000 
 127.193667 35.747222 444.000000 127.193667 35.747222 459.000000 
 127.193778 35.747222 438.000000 127.193778 35.747222 454.000000 
 127.193778 35.747333 448.000000 127.193778 35.747333 462.000000 
 127.193778 35.747444 453.000000 127.193778 35.747444 464.000000 
 127.193889 35.747444 444.000000 127.193889 35.747444 455.000000 
 127.193889 35.747556 446.000000 127.193889 35.747556 457.000000 
 127.193889 35.747667 449.000000 127.193889 35.747667 460.000000 
 127.194000 35.747667 442.000000 127.194000 35.747667 453.000000 
 127.194000 35.747778 446.000000 127.194000 35.747778 459.000000 
 127.194000 35.747889 452.000000 127.194000 35.747889 464.000000 
 127.194111 35.747889 446.000000 127.194111 35.747889 457.000000 
 127.194111 35.748000 451.000000 127.194111 35.748000 465.000000 
 127.194111 35.748111 461.000000 127.194111 35.748111 472.000000 
 127.194222 35.748111 457.000000 127.194222 35.748111 469.000000 
 127.194222 35.748222 466.000000 127.194222 35.748222 481.000000 
 127.194222 35.748333 477.000000 127.194222 35.748333 484.000000 
 127.194333 35.748333 471.000000 127.194333 35.748333 478.000000 
 127.194333 35.748444 473.000000 127.194333 35.748444 479.000000 
 127.194333 35.748556 475.000000 127.194333 35.748556 480.000000 
 127.194444 35.748556 472.000000 127.194444 35.748556 478.000000 
 127.194444 35.748667 475.000000 127.194444 35.748667 480.000000 
 127.194444 35.748778 479.000000 127.194444 35.748778 476.000000 
 127.194556 35.748778 476.000000 127.194556 35.748778 476.000000 
 127.194556 35.748889 475.000000 127.194556 35.748889 469.000000 
 127.194556 35.749000 468.000000 127.194556 35.749000 458.000000 
 127.194667 35.749000 467.000000 127.194667 35.749000 457.000000 
 127.194667 35.749111 455.000000 127.194667 35.749111 450.000000 
 127.194667 35.749222 448.000000 127.194667 35.749222 436.000000 
 127.194778 35.749333 433.000000 127.194778 35.749333 425.000000 
 127.194778 35.749444 423.000000 127.194778 35.749444 408.000000 
 127.194778 35.749556 407.000000 127.194778 35.749556 397.000000 
 127.194889 35.749556 407.000000 127.194889 35.749556 396.000000 
 127.194889 35.749667 397.000000 127.194889 35.749667 385.000000 
 127.194889 35.749778 388.000000 127.194889 35.749778 376.000000 
 127.195000 35.749778 396.000000 127.195000 35.749778 382.000000 
 127.195000 35.749889 392.000000 127.195000 35.749889 375.000000 
 127.195000 35.750000 386.000000 127.195000 35.750000 373.000000 
 127.195111 35.750000 396.000000 127.195111 35.750000 383.000000 
 127.195111 35.750111 393.000000 127.195111 35.750111 377.000000 
 127.195111 35.750222 387.000000 127.195111 35.750222 374.000000 
 127.195222 35.750222 397.000000 127.195222 35.750222 384.000000 
 127.195222 35.750333 394.000000 127.195222 35.750333 379.000000 
 127.195222 35.750444 388.000000 127.195222 35.750444 376.000000 
 127.195333 35.750444 399.000000 127.195333 35.750444 385.000000 
 127.195333 35.750556 395.000000 127.195333 35.750556 382.000000 
 127.195333 35.750667 391.000000 127.195333 35.750667 377.000000 
 127.195444 35.750667 400.000000 127.195444 35.750667 385.000000 
 127.195444 35.750778 394.000000 127.195444 35.750778 382.000000 
 127.195444 35.750889 389.000000 127.195444 35.750889 376.000000 
 127.195556 35.750889 398.000000 127.195556 35.750889 383.000000 
 127.195556 35.751000 390.000000 127.195556 35.751000 379.000000 
 127.195556 35.751111 386.000000 127.195556 35.751111 372.000000 
 127.195667 35.751111 392.000000 127.195667 35.751111 378.000000 
 127.195667 35.751222 384.000000 127.195667 35.751222 373.000000 
 127.195667 35.751333 378.000000 127.195667 35.751333 361.000000 
 127.195778 35.751333 382.000000 127.195778 35.751333 366.000000 
 127.195778 35.751444 368.000000 127.195778 35.751444 357.000000 
 127.195778 35.751556 358.000000 127.195778 35.751556 338.000000 
 127.195889 35.751556 360.000000 127.195889 35.751556 341.000000 
 127.195889 35.751667 346.000000 127.195889 35.751667 330.000000 
 127.195889 35.751778 337.000000 127.195889 35.751778 319.000000 
 127.196000 35.751778 344.000000 127.196000 35.751778 327.000000 
 127.196000 35.751889 334.000000 127.196000 35.751889 322.000000 
 127.196000 35.752000 330.000000 127.196000 35.752000 314.000000 
 127.196111 35.752000 334.000000 127.196111 35.752000 322.000000 
 127.196111 35.752111 324.000000 127.196111 35.752111 317.000000 
 127.196111 35.752222 320.000000 127.196111 35.752222 314.000000 
 127.196222 35.752222 317.000000 127.196222 35.752222 317.000000 
 127.196222 35.752333 313.000000 127.196222 35.752333 315.000000 
 127.196222 35.752444 312.000000 127.196222 35.752444 314.000000 
 127.196333 35.752444 304.000000 127.196333 35.752444 311.000000 
 127.196333 35.752556 306.000000 127.196333 35.752556 315.000000 
 127.196333 35.752667 309.000000 127.196333 35.752667 315.000000 
 127.196444 35.752667 301.000000 127.196444 35.752667 311.000000 
 127.196444 35.752778 303.000000 127.196444 35.752778 313.000000 
 127.196444 35.752889 306.000000 127.196444 35.752889 313.000000 
 127.196556 35.752889 296.000000 127.196556 35.752889 307.000000 
 127.196556 35.753000 296.000000 127.196556 35.753000 305.000000 
 127.196556 35.753111 295.000000 127.196556 35.753111 301.000000 
 127.196667 35.753111 286.000000 127.196667 35.753111 292.000000 
 127.196667 35.753222 284.000000 127.196667 35.753222 287.000000 
 127.196667 35.753333 280.000000 127.196667 35.753333 282.000000 
 127.196667 35.753444 276.000000 127.196667 35.753444 275.000000 
 127.196778 35.753444 269.000000 127.196778 35.753444 269.000000 
 127.196778 35.753556 264.000000 127.196778 35.753556 267.000000 
 127.196778 35.753667 261.000000 127.196778 35.753667 267.000000 
 127.196889 35.753667 255.000000 127.196889 35.753667 260.000000 
 127.196889 35.753778 254.000000 127.196889 35.753778 259.000000 
 127.196889 35.753889 253.000000 127.196889 35.753889 258.000000 
 127.197000 35.753889 246.000000 127.197000 35.753889 252.000000 
 127.197000 35.754000 245.000000 127.197000 35.754000 249.000000 
 127.197000 35.754111 243.000000 127.197000 35.754111 247.000000 
 127.197111 35.754111 236.000000 127.197111 35.754111 241.000000 
 127.197111 35.754222 234.000000 127.197111 35.754222 238.000000 
 127.197111 35.754333 232.000000 127.197111 35.754333 236.000000 
 127.197222 35.754333 226.000000 127.197222 35.754333 230.000000 
 127.197222 35.754444 224.000000 127.197222 35.754444 228.000000 
 127.197222 35.754556 222.000000 127.197222 35.754556 227.000000 
 127.197333 35.754556 216.000000 127.197333 35.754556 221.000000 
 127.197333 35.754667 214.000000 127.197333 35.754667 219.000000 
 127.197333 35.754778 213.000000 127.197333 35.754778 218.000000 
 127.197444 35.754778 209.000000 127.197444 35.754778 211.000000 
 127.197444 35.754889 206.000000 127.197444 35.754889 209.000000 
 127.197444 35.755000 204.000000 127.197444 35.755000 207.000000 
 127.197556 35.755000 204.000000 127.197556 35.755000 201.000000 
 127.197556 35.755111 203.000000 127.197556 35.755111 200.000000 
 127.197556 35.755222 201.000000 127.197556 35.755222 197.000000 
 127.197667 35.755222 206.000000 127.197667 35.755222 199.000000 
 127.197667 35.755333 204.000000 127.197667 35.755333 197.000000 
 127.197667 35.755444 201.000000 127.197667 35.755444 196.000000 
 127.197778 35.755444 207.000000 127.197778 35.755444 199.000000 
 127.197778 35.755556 206.000000 127.197778 35.755556 199.000000 
 127.197778 35.755667 205.000000 127.197778 35.755667 200.000000 
 127.197889 35.755667 211.000000 127.197889 35.755667 204.000000 
 127.197889 35.755778 208.000000 127.197889 35.755778 204.000000 
 127.197889 35.755889 208.000000 127.197889 35.755889 205.000000 
 127.198000 35.755889 212.000000 127.198000 35.755889 210.000000 
 127.198000 35.756000 215.000000 127.198000 35.756000 210.000000 
 127.198000 35.756111 216.000000 127.198000 35.756111 210.000000 
 127.198111 35.756111 221.000000 127.198111 35.756111 216.000000 
 127.198111 35.756222 223.000000 127.198111 35.756222 216.000000 
 127.198111 35.756333 224.000000 127.198111 35.756333 215.000000 
 127.198222 35.756333 230.000000 127.198222 35.756333 222.000000 
 127.198222 35.756444 229.000000 127.198222 35.756444 220.000000 
 127.198222 35.756556 226.000000 127.198222 35.756556 217.000000 
 127.198333 35.756556 232.000000 127.198333 35.756556 222.000000 
 127.198333 35.756667 227.000000 127.198333 35.756667 220.000000 
 127.198333 35.756778 226.000000 127.198333 35.756778 223.000000 
 127.198444 35.756778 232.000000 127.198444 35.756778 229.000000 
 127.198444 35.756889 235.000000 127.198444 35.756889 231.000000 
 127.198444 35.757000 238.000000 127.198444 35.757000 234.000000 
 127.198556 35.757000 244.000000 127.198556 35.757000 241.000000 
 127.198556 35.757111 247.000000 127.198556 35.757111 242.000000 
 127.198556 35.757222 249.000000 127.198556 35.757222 242.000000 
 127.198667 35.757333 256.000000 127.198667 35.757333 247.000000 
 127.198667 35.757444 254.000000 127.198667 35.757444 244.000000 
 127.198667 35.757556 251.000000 127.198667 35.757556 239.000000 
 127.198778 35.757556 257.000000 127.198778 35.757556 245.000000 
 127.198778 35.757667 248.000000 127.198778 35.757667 236.000000 
 127.198778 35.757778 237.000000 127.198778 35.757778 222.000000 
 127.198889 35.757778 237.000000 127.198889 35.757778 222.000000 
 127.198889 35.757889 222.000000 127.198889 35.757889 214.000000 
 127.198889 35.758000 215.000000 127.198889 35.758000 202.000000 
 127.199000 35.758000 217.000000 127.199000 35.758000 204.000000 
 127.199000 35.758111 206.000000 127.199000 35.758111 197.000000 
 127.199000 35.758222 199.000000 127.199000 35.758222 190.000000 
 127.199111 35.758222 202.000000 127.199111 35.758222 192.000000 
 127.199111 35.758333 194.000000 127.199111 35.758333 187.000000 
 127.199111 35.758444 188.000000 127.199111 35.758444 179.000000 
 127.199222 35.758444 190.000000 127.199222 35.758444 181.000000 
 127.199222 35.758556 183.000000 127.199222 35.758556 176.000000 
 127.199222 35.758667 178.000000 127.199222 35.758667 170.000000 
 127.199333 35.758667 182.000000 127.199333 35.758667 172.000000 
 127.199333 35.758778 175.000000 127.199333 35.758778 169.000000 
 127.199333 35.758889 172.000000 127.199333 35.758889 165.000000 
 127.199444 35.758889 177.000000 127.199444 35.758889 168.000000 
 127.199444 35.759000 172.000000 127.199444 35.759000 165.000000 
 127.199444 35.759111 169.000000 127.199444 35.759111 160.000000 
 127.199556 35.759111 174.000000 127.199556 35.759111 164.000000 
 127.199556 35.759222 169.000000 127.199556 35.759222 153.000000 
 127.199556 35.759333 160.000000 127.199556 35.759333 148.000000 
 127.199667 35.759333 166.000000 127.199667 35.759333 153.000000 
 127.199667 35.759444 159.000000 127.199667 35.759444 147.000000 
 127.199667 35.759556 151.000000 127.199667 35.759556 143.000000 
 127.199778 35.759556 156.000000 127.199778 35.759556 147.000000 
 127.199778 35.759667 151.000000 127.199778 35.759667 140.000000 
 127.199778 35.759778 144.000000 127.199778 35.759778 133.000000 
 127.199889 35.759778 150.000000 127.199889 35.759778 138.000000 
 127.199889 35.759889 142.000000 127.199889 35.759889 129.000000 
 127.199889 35.760000 132.000000 127.199889 35.760000 129.000000 
 127.200000 35.760000 138.000000 127.200000 35.760000 129.000000 
 127.200000 35.760111 135.000000 127.200000 35.760111 129.000000 
 127.200000 35.760222 133.000000 127.200000 35.760222 127.000000 
 127.200111 35.760222 135.000000 127.200111 35.760222 131.000000 
 127.200111 35.760333 134.000000 127.200111 35.760333 125.000000 
 127.200111 35.760444 128.000000 127.200111 35.760444 121.000000 
 127.200222 35.760556 125.000000 127.200222 35.760556 119.000000 
 127.200222 35.760667 121.000000 127.200222 35.760667 116.000000 
 127.200222 35.760778 118.000000 127.200222 35.760778 115.000000 
 127.200333 35.760778 120.000000 127.200333 35.760778 115.000000 
 127.200333 35.760889 121.000000 127.200333 35.760889 114.000000 
 127.200333 35.761000 117.000000 127.200333 35.761000 111.000000 
 127.200444 35.761000 120.000000 127.200444 35.761000 111.000000 
 127.200444 35.761111 113.000000 127.200444 35.761111 110.000000 
 127.200444 35.761222 110.000000 127.200444 35.761222 111.000000 
 127.200556 35.761222 110.000000 127.200556 35.761222 110.000000 
 127.200556 35.761333 110.000000 127.200556 35.761333 110.000000 
 127.200556 35.761444 110.000000 127.200556 35.761444 110.000000 
 127.200667 35.761444 110.000000 127.200667 35.761444 110.000000 
 127.200667 35.761556 110.000000 127.200667 35.761556 109.000000 
 127.200667 35.761667 108.000000 127.200667 35.761667 108.000000 
 127.200778 35.761667 107.000000 127.200778 35.761667 107.000000 
 127.200778 35.761778 106.000000 127.200778 35.761778 107.000000 
 127.200778 35.761889 106.000000 127.200778 35.761889 107.000000 
 127.200889 35.761889 105.000000 127.200889 35.761889 107.000000 
 127.200889 35.762000 106.000000 127.200889 35.762000 106.000000 
 127.200889 35.762111 105.000000 127.200889 35.762111 106.000000 
 127.201000 35.762111 105.000000 127.201000 35.762111 105.000000 
 127.201000 35.762222 105.000000 127.201000 35.762222 106.000000 
 127.201000 35.762333 104.000000 127.201000 35.762333 106.000000 
 127.201111 35.762333 104.000000 127.201111 35.762333 104.000000 
 127.201111 35.762444 104.000000 127.201111 35.762444 104.000000 
 127.201111 35.762556 104.000000 127.201111 35.762556 105.000000 
 127.201222 35.762556 103.000000 127.201222 35.762556 104.000000 
 127.201222 35.762667 103.000000 127.201222 35.762667 104.000000 
 127.201222 35.762778 103.000000 127.201222 35.762778 104.000000 
 127.201333 35.762778 102.000000 127.201333 35.762778 103.000000 
 127.201333 35.762889 102.000000 127.201333 35.762889 102.000000 
 127.201333 35.763000 101.000000 127.201333 35.763000 102.000000 
 127.201444 35.763000 100.000000 127.201444 35.763000 100.000000 
 127.201444 35.763111 100.000000 127.201444 35.763111 100.000000 
 127.201444 35.763222 100.000000 127.201444 35.763222 100.000000 
 127.201444 35.763333 100.000000 127.201444 35.763333 100.000000 
 127.201556 35.763333 100.000000 127.201556 35.763333 100.000000 
 127.201556 35.763444 100.000000 127.201556 35.763444 99.000000 
 127.201556 35.763556 98.000000 127.201556 35.763556 99.000000 
 127.201667 35.763556 98.000000 127.201667 35.763556 98.000000 
 127.201667 35.763667 97.000000 127.201667 35.763667 97.000000 
 127.201667 35.763778 97.000000 127.201667 35.763778 97.000000 
 127.201778 35.763778 96.000000 127.201778 35.763778 96.000000 
 127.201778 35.763889 96.000000 127.201778 35.763889 95.000000 
 127.201778 35.764000 95.000000 127.201778 35.764000 95.000000 
 127.201889 35.764000 95.000000 127.201889 35.764000 95.000000 
 127.201889 35.764111 95.000000 127.201889 35.764111 95.000000 
 127.201889 35.764222 95.000000 127.201889 35.764222 95.000000 
 127.202000 35.764222 95.000000 127.202000 35.764222 95.000000 
 127.202000 35.764333 95.000000 127.202000 35.764333 95.000000 
 127.202000 35.764444 95.000000 127.202000 35.764444 95.000000 
 127.202111 35.764444 95.000000 127.202111 35.764444 95.000000 
 127.202111 35.764556 95.000000 127.202111 35.764556 95.000000 
 127.202111 35.764667 95.000000 127.202111 35.764667 95.000000 
 127.202222 35.764667 95.000000 127.202222 35.764667 95.000000 
 127.202222 35.764778 95.000000 127.202222 35.764778 94.000000 
 127.202222 35.764889 94.000000 127.202222 35.764889 94.000000 
 127.202333 35.764889 95.000000 127.202333 35.764889 94.000000 
 127.202333 35.765000 94.000000 127.202333 35.765000 93.000000 
 127.202333 35.765111 93.000000 127.202333 35.765111 92.000000 
 127.202444 35.765111 93.000000 127.202444 35.765111 92.000000 
 127.202444 35.765222 92.000000 127.202444 35.765222 92.000000 
 127.202444 35.765333 92.000000 127.202444 35.765333 91.000000 
 127.202556 35.765444 91.000000 127.202556 35.765444 90.000000 
 127.202556 35.765556 90.000000 127.202556 35.765556 90.000000 
 127.202556 35.765667 90.000000 127.202556 35.765667 90.000000 
 127.202667 35.765667 90.000000 127.202667 35.765667 90.000000 
 127.202667 35.765778 90.000000 127.202667 35.765778 90.000000 
 127.202667 35.765889 90.000000 127.202667 35.765889 90.000000 
 127.202778 35.765889 90.000000 127.202778 35.765889 90.000000 
 127.202778 35.766000 90.000000 127.202778 35.766000 91.000000 
 127.202778 35.766111 90.000000 127.202778 35.766111 104.000000 
 127.202889 35.766111 90.000000 127.202889 35.766111 103.000000 
 127.202889 35.766222 102.000000 127.202889 35.766222 110.000000 
 127.202889 35.766333 110.000000 127.202889 35.766333 100.000000 
 127.203000 35.766333 110.000000 127.203000 35.766333 100.000000 
 127.203000 35.766444 107.000000 127.203000 35.766444 100.000000 
 127.203000 35.766556 100.000000 127.203000 35.766556 100.000000 
 127.203111 35.766556 100.000000 127.203111 35.766556 100.000000 
 127.203111 35.766667 100.000000 127.203111 35.766667 100.000000 
 127.203111 35.766778 100.000000 127.203111 35.766778 106.000000 
 127.203222 35.766778 99.000000 127.203222 35.766778 99.000000 
 127.203222 35.766889 99.000000 127.203222 35.766889 103.000000 
 127.203222 35.767000 98.000000 127.203222 35.767000 97.000000 
 127.203333 35.767000 95.000000 127.203333 35.767000 94.000000 
 127.203333 35.767111 92.000000 127.203333 35.767111 91.000000 
 127.203333 35.767222 90.000000 127.203333 35.767222 88.000000 
 127.203444 35.767222 90.000000 127.203444 35.767222 88.000000 
 127.203444 35.767333 88.000000 127.203444 35.767333 86.000000 
 127.203444 35.767444 86.000000 127.203444 35.767444 85.000000 
 127.203444 35.767556 85.000000 127.203444 35.767556 85.000000 
 127.203556 35.767556 85.000000 127.203556 35.767556 85.000000 
 127.203556 35.767667 85.000000 127.203556 35.767667 85.000000 
 127.203556 35.767778 85.000000 127.203556 35.767778 85.000000 
 127.203667 35.767778 85.000000 127.203667 35.767778 84.000000 
 127.203667 35.767889 80.000000 127.203667 35.767889 80.000000 
 127.203667 35.768000 81.000000 127.203667 35.768000 80.000000 
 127.203778 35.768000 83.000000 127.203778 35.768000 84.000000 
 127.203778 35.768111 87.000000 127.203778 35.768111 83.000000 
 127.203778 35.768222 87.000000 127.203778 35.768222 82.000000 
 127.203889 35.768222 86.000000 127.203889 35.768222 84.000000 
 127.203889 35.768333 81.000000 127.203889 35.768333 81.000000 
 127.203889 35.768444 80.000000 127.203889 35.768444 80.000000 
 127.204000 35.768444 80.000000 127.204000 35.768444 80.000000 
 127.204000 35.768556 80.000000 127.204000 35.768556 80.000000 
 127.204000 35.768667 80.000000 127.204000 35.768667 80.000000 
 127.204111 35.768667 81.000000 127.204111 35.768667 80.000000 
 127.204111 35.768778 80.000000 127.204111 35.768778 80.000000 
 127.204111 35.768889 80.000000 127.204111 35.768889 80.000000 
 127.204222 35.768889 81.000000 127.204222 35.768889 80.000000 
 127.204222 35.769000 80.000000 127.204222 35.769000 80.000000 
 127.204222 35.769111 80.000000 127.204222 35.769111 80.000000 
 127.204333 35.769111 80.000000 127.204333 35.769111 80.000000 
 127.204333 35.769222 80.000000 127.204333 35.769222 80.000000 
 127.204333 35.769333 80.000000 127.204333 35.769333 80.000000 
 127.204333 35.769444 80.000000 127.204333 35.769444 80.000000 
 127.204444 35.769444 80.000000 127.204444 35.769444 80.000000 
 127.204444 35.769556 80.000000 127.204444 35.769556 80.000000 
 127.204444 35.769667 80.000000 127.204444 35.769667 80.000000 
 127.204556 35.769667 80.000000 127.204556 35.769667 80.000000 
 127.204556 35.769778 80.000000 127.204556 35.769778 80.000000 
 127.204556 35.769889 80.000000 127.204556 35.769889 80.000000 
 127.204667 35.769889 80.000000 127.204667 35.769889 80.000000 
 127.204667 35.770000 80.000000 127.204667 35.770000 80.000000 
 127.204667 35.770111 80.000000 127.204667 35.770111 80.000000 
 127.204778 35.770111 80.000000 127.204778 35.770111 80.000000 
 127.204778 35.770222 80.000000 127.204778 35.770222 80.000000 
 127.204778 35.770333 80.000000 127.204778 35.770333 80.000000 
 127.204889 35.770333 80.000000 127.204889 35.770333 80.000000 
 127.204889 35.770444 80.000000 127.204889 35.770444 80.000000 
 127.204889 35.770556 80.000000 127.204889 35.770556 80.000000 
 127.205000 35.770556 80.000000 127.205000 35.770556 80.000000 
 127.205000 35.770667 80.000000 127.205000 35.770667 80.000000 
 127.205000 35.770778 80.000000 127.205000 35.770778 80.000000 
 127.205111 35.770778 80.000000 127.205111 35.770778 80.000000 
 127.205111 35.770889 80.000000 127.205111 35.770889 80.000000 
 127.205111 35.771000 80.000000 127.205111 35.771000 80.000000 
 127.205111 35.771111 80.000000 127.205111 35.771111 80.000000 
 127.205222 35.771111 80.000000 127.205222 35.771111 80.000000 
 127.205222 35.771222 80.000000 127.205222 35.771222 80.000000 
 127.205222 35.771333 80.000000 127.205222 35.771333 80.000000 
 127.205333 35.771333 80.000000 127.205333 35.771333 80.000000 
 127.205333 35.771444 80.000000 127.205333 35.771444 80.000000 
 127.205333 35.771556 80.000000 127.205333 35.771556 80.000000 
 127.205444 35.771556 81.000000 127.205444 35.771556 80.000000 
 127.205444 35.771667 81.000000 127.205444 35.771667 80.000000 
 127.205444 35.771778 81.000000 127.205444 35.771778 80.000000 
 127.205556 35.771778 81.000000 127.205556 35.771778 80.000000 
 127.205556 35.771889 81.000000 127.205556 35.771889 80.000000 
 127.205556 35.772000 81.000000 127.205556 35.772000 81.000000 
 127.205667 35.772000 81.000000 127.205667 35.772000 81.000000 
 127.205667 35.772111 81.000000 127.205667 35.772111 81.000000 
 127.205667 35.772222 81.000000 127.205667 35.772222 81.000000 
 127.205778 35.772222 81.000000 127.205778 35.772222 81.000000 
 127.205778 35.772333 81.000000 127.205778 35.772333 81.000000 
 127.205778 35.772444 81.000000 127.205778 35.772444 81.000000 
 127.205889 35.772444 81.000000 127.205889 35.772444 81.000000 
 127.205889 35.772556 81.000000 127.205889 35.772556 81.000000 
 127.205889 35.772667 81.000000 127.205889 35.772667 81.000000 
 127.205889 35.772778 81.000000 127.205889 35.772778 81.000000 
 127.206000 35.772778 81.000000 127.206000 35.772778 81.000000 
 127.206000 35.772889 81.000000 127.206000 35.772889 81.000000 
 127.206000 35.773000 81.000000 127.206000 35.773000 81.000000 
 127.206111 35.773000 81.000000 127.206111 35.773000 81.000000 
 127.206111 35.773111 81.000000 127.206111 35.773111 82.000000 
 127.206111 35.773222 82.000000 127.206111 35.773222 82.000000 
 127.206222 35.773222 82.000000 127.206222 35.773222 82.000000 
 127.206222 35.773333 82.000000 127.206222 35.773333 82.000000 
 127.206222 35.773444 82.000000 127.206222 35.773444 83.000000 
 127.206333 35.773444 82.000000 127.206333 35.773444 83.000000 
 127.206333 35.773556 83.000000 127.206333 35.773556 83.000000 
 127.206333 35.773667 83.000000 127.206333 35.773667 84.000000 
 127.206444 35.773667 83.000000 127.206444 35.773667 84.000000 
 127.206444 35.773778 84.000000 127.206444 35.773778 84.000000 
 127.206444 35.773889 84.000000 127.206444 35.773889 84.000000 
 127.206556 35.773889 84.000000 127.206556 35.773889 84.000000 
 127.206556 35.774000 84.000000 127.206556 35.774000 84.000000 
 127.206556 35.774111 89.000000 127.206556 35.774111 86.000000 
 127.206667 35.774222 104.000000 127.206667 35.774222 97.000000 
 127.206667 35.774333 106.000000 127.206667 35.774333 100.000000 
 127.206667 35.774444 109.000000 127.206667 35.774444 102.000000 
 127.206778 35.774444 118.000000 127.206778 35.774444 110.000000 
 127.206778 35.774556 119.000000 127.206778 35.774556 111.000000 
 127.206778 35.774667 118.000000 127.206778 35.774667 109.000000 
 127.206889 35.774667 126.000000 127.206889 35.774667 116.000000 
 127.206889 35.774778 122.000000 127.206889 35.774778 114.000000 
 127.206889 35.774889 119.000000 127.206889 35.774889 124.000000 
 127.207000 35.774889 124.000000 127.207000 35.774889 126.000000 
 127.207000 35.775000 128.000000 127.207000 35.775000 132.000000 
 127.207000 35.775111 135.000000 127.207000 35.775111 137.000000 
 127.207111 35.775111 137.000000 127.207111 35.775111 142.000000 
 127.207111 35.775222 145.000000 127.207111 35.775222 142.000000 
 127.207111 35.775333 147.000000 127.207111 35.775333 140.000000 
 127.207222 35.775333 152.000000 127.207222 35.775333 146.000000 
 127.207222 35.775444 152.000000 127.207222 35.775444 144.000000 
 127.207222 35.775556 150.000000 127.207222 35.775556 145.000000 
 127.207333 35.775556 157.000000 127.207333 35.775556 150.000000 
 127.207333 35.775667 156.000000 127.207333 35.775667 152.000000 
 127.207333 35.775778 157.000000 127.207333 35.775778 160.000000 
 127.207333 35.775889 164.000000 127.207333 35.775889 167.000000 
 127.207444 35.775889 168.000000 127.207444 35.775889 171.000000 
 127.207444 35.776000 174.000000 127.207444 35.776000 181.000000 
 127.207444 35.776111 184.000000 127.207444 35.776111 185.000000 
 127.207556 35.776111 188.000000 127.207556 35.776111 190.000000 
 127.207556 35.776222 194.000000 127.207556 35.776222 191.000000 
 127.207556 35.776333 196.000000 127.207556 35.776333 187.000000 
 127.207667 35.776333 201.000000 127.207667 35.776333 192.000000 
 127.207667 35.776444 197.000000 127.207667 35.776444 187.000000 
 127.207667 35.776556 192.000000 127.207667 35.776556 179.000000 
 127.207778 35.776556 195.000000 127.207778 35.776556 183.000000 
 127.207778 35.776667 185.000000 127.207778 35.776667 176.000000 
 127.207778 35.776778 179.000000 127.207778 35.776778 167.000000 
 127.207889 35.776778 181.000000 127.207889 35.776778 169.000000 
 127.207889 35.776889 171.000000 127.207889 35.776889 163.000000 
 127.207889 35.777000 165.000000 127.207889 35.777000 153.000000 
 127.208000 35.777000 167.000000 127.208000 35.777000 156.000000 
 127.208000 35.777111 162.000000 127.208000 35.777111 153.000000 
 127.208000 35.777222 159.000000 127.208000 35.777222 149.000000 
 127.208000 35.777333 154.000000 127.208000 35.777333 148.000000 
 127.208111 35.777333 160.000000 127.208111 35.777333 150.000000 
 127.208111 35.777444 156.000000 127.208111 35.777444 152.000000 
 127.208111 35.777556 157.000000 127.208111 35.777556 154.000000 
 127.208222 35.777556 163.000000 127.208222 35.777556 160.000000 
 127.208222 35.777667 165.000000 127.208222 35.777667 159.000000 
 127.208222 35.777778 164.000000 127.208222 35.777778 157.000000 
 127.208333 35.777778 171.000000 127.208333 35.777778 163.000000 
 127.208333 35.777889 170.000000 127.208333 35.777889 161.000000 
 127.208333 35.778000 169.000000 127.208333 35.778000 158.000000 
 127.208444 35.778000 177.000000 127.208444 35.778000 166.000000 
 127.208444 35.778111 174.000000 127.208444 35.778111 166.000000 
 127.208444 35.778222 173.000000 127.208444 35.778222 170.000000 
 127.208556 35.778222 180.000000 127.208556 35.778222 174.000000 
 127.208556 35.778333 181.000000 127.208556 35.778333 180.000000 
 127.208556 35.778444 184.000000 127.208556 35.778444 192.000000 
 127.208667 35.778556 195.000000 127.208667 35.778556 200.000000 
 127.208667 35.778667 201.000000 127.208667 35.778667 211.000000 
 127.208667 35.778778 212.000000 127.208667 35.778778 214.000000 
 127.208778 35.778778 215.000000 127.208778 35.778778 219.000000 
 127.208778 35.778889 222.000000 127.208778 35.778889 220.000000 
 127.208778 35.779000 226.000000 127.208778 35.779000 220.000000 
 127.208889 35.779000 230.000000 127.208889 35.779000 227.000000 
 127.208889 35.779111 231.000000 127.208889 35.779111 227.000000 
 127.208889 35.779222 231.000000 127.208889 35.779222 226.000000 
 127.209000 35.779222 233.000000 127.209000 35.779222 227.000000 
 127.209000 35.779333 227.000000 127.209000 35.779333 216.000000 
 127.209000 35.779444 214.000000 127.209000 35.779444 209.000000 
 127.209111 35.779444 213.000000 127.209111 35.779444 207.000000 
 127.209111 35.779556 204.000000 127.209111 35.779556 200.000000 
 127.209111 35.779667 197.000000 127.209111 35.779667 191.000000 
 127.209222 35.779667 196.000000 127.209222 35.779667 188.000000 
 127.209222 35.779778 189.000000 127.209222 35.779778 182.000000 
 127.209222 35.779889 184.000000 127.209222 35.779889 173.000000 
 127.209222 35.780000 176.000000 127.209222 35.780000 169.000000 
 127.209333 35.780000 181.000000 127.209333 35.780000 173.000000 
 127.209333 35.780111 176.000000 127.209333 35.780111 168.000000 
 127.209333 35.780222 170.000000 127.209333 35.780222 164.000000 
 127.209444 35.780222 172.000000 127.209444 35.780222 167.000000 
 127.209444 35.780333 169.000000 127.209444 35.780333 164.000000 
 127.209444 35.780444 168.000000 127.209444 35.780444 165.000000 
 127.209556 35.780444 172.000000 127.209556 35.780444 170.000000 
 127.209556 35.780556 175.000000 127.209556 35.780556 175.000000 
 127.209556 35.780667 181.000000 127.209556 35.780667 179.000000 
 127.209667 35.780667 187.000000 127.209667 35.780667 184.000000 
 127.209667 35.780778 190.000000 127.209667 35.780778 186.000000 
 127.209667 35.780889 192.000000 127.209667 35.780889 184.000000 
 127.209778 35.780889 197.000000 127.209778 35.780889 189.000000 
 127.209778 35.781000 194.000000 127.209778 35.781000 183.000000 
 127.209778 35.781111 188.000000 127.209778 35.781111 180.000000 
 127.209889 35.781111 193.000000 127.209889 35.781111 186.000000 
 127.209889 35.781222 191.000000 127.209889 35.781222 190.000000 
 127.209889 35.781333 195.000000 127.209889 35.781333 195.000000 
 127.209889 35.781444 199.000000 127.209889 35.781444 202.000000 
 127.210000 35.781444 204.000000 127.210000 35.781444 207.000000 
 127.210000 35.781556 211.000000 127.210000 35.781556 210.000000 
 127.210000 35.781667 212.000000 127.210000 35.781667 207.000000 
 127.210111 35.781667 212.000000 127.210111 35.781667 208.000000 
 127.210111 35.781778 207.000000 127.210111 35.781778 199.000000 
 127.210111 35.781889 198.000000 127.210111 35.781889 192.000000 
 127.210222 35.781889 196.000000 127.210222 35.781889 191.000000 
 127.210222 35.782000 190.000000 127.210222 35.782000 180.000000 
 127.210222 35.782111 179.000000 127.210222 35.782111 172.000000 
 127.210333 35.782111 179.000000 127.210333 35.782111 173.000000 
 127.210333 35.782222 174.000000 127.210333 35.782222 169.000000 
 127.210333 35.782333 172.000000 127.210333 35.782333 169.000000 
 127.210444 35.782333 175.000000 127.210444 35.782333 172.000000 
 127.210444 35.782444 175.000000 127.210444 35.782444 177.000000 
 127.210444 35.782556 181.000000 127.210444 35.782556 180.000000 
 127.210556 35.782556 185.000000 127.210556 35.782556 185.000000 
 127.210556 35.782667 190.000000 127.210556 35.782667 189.000000 
 127.210556 35.782778 195.000000 127.210556 35.782778 192.000000 
 127.210556 35.782889 198.000000 127.210556 35.782889 193.000000 
 127.210667 35.782889 204.000000 127.210667 35.782889 200.000000 
 127.210667 35.783000 206.000000 127.210667 35.783000 198.000000 
 127.210667 35.783111 204.000000 127.210667 35.783111 195.000000 
 127.210778 35.783111 210.000000 127.210778 35.783111 201.000000 
 127.210778 35.783222 208.000000 127.210778 35.783222 201.000000 
 127.210778 35.783333 205.000000 127.210778 35.783333 206.000000 
 127.210889 35.783333 209.000000 127.210889 35.783333 209.000000 
 127.210889 35.783444 213.000000 127.210889 35.783444 218.000000 
 127.210889 35.783556 221.000000 127.210889 35.783556 224.000000 
 127.211000 35.783556 224.000000 127.211000 35.783556 227.000000 
 127.211000 35.783667 228.000000 127.211000 35.783667 234.000000 
 127.211000 35.783778 236.000000 127.211000 35.783778 238.000000 
 127.211111 35.783778 239.000000 127.211111 35.783778 241.000000 
 127.211111 35.783889 243.000000 127.211111 35.783889 243.000000 
 127.211111 35.784000 243.000000 127.211111 35.784000 242.000000 
 127.211111 35.784111 240.000000 127.211111 35.784111 239.000000 
 127.211222 35.784111 234.000000 127.211222 35.784111 232.000000 
 127.211222 35.784222 224.000000 127.211222 35.784222 228.000000 
 127.211222 35.784333 221.000000 127.211222 35.784333 226.000000 
 127.211333 35.784333 215.000000 127.211333 35.784333 219.000000 
 127.211333 35.784444 211.000000 127.211333 35.784444 217.000000 
 127.211333 35.784556 209.000000 127.211333 35.784556 215.000000 
 127.211444 35.784556 199.000000 127.211444 35.784556 207.000000 
 127.211444 35.784667 199.000000 127.211444 35.784667 206.000000 
 127.211444 35.784778 199.000000 127.211444 35.784778 205.000000 
 127.211556 35.784778 191.000000 127.211556 35.784778 199.000000 
 127.211556 35.784889 192.000000 127.211556 35.784889 197.000000 
 127.211556 35.785000 191.000000 127.211556 35.785000 192.000000 
 127.211667 35.785000 184.000000 127.211667 35.785000 187.000000 
 127.211667 35.785111 181.000000 127.211667 35.785111 181.000000 
 127.211667 35.785222 175.000000 127.211667 35.785222 176.000000 
 127.211667 35.785333 172.000000 127.211667 35.785333 169.000000 
 127.211778 35.785333 168.000000 127.211778 35.785333 167.000000 
 127.211778 35.785444 163.000000 127.211778 35.785444 162.000000 
 127.211778 35.785556 159.000000 127.211778 35.785556 155.000000 
 127.211889 35.785556 156.000000 127.211889 35.785556 153.000000 
 127.211889 35.785667 150.000000 127.211889 35.785667 148.000000 
 127.211889 35.785778 145.000000 127.211889 35.785778 138.000000 
 127.212000 35.785778 140.000000 127.212000 35.785778 134.000000 
 127.212000 35.785889 133.000000 127.212000 35.785889 135.000000 
 127.212000 35.786000 132.000000 127.212000 35.786000 135.000000 
 127.212111 35.786000 130.000000 127.212111 35.786000 135.000000 
 127.212111 35.786111 136.000000 127.212111 35.786111 139.000000 
 127.212111 35.786222 140.000000 127.212111 35.786222 146.000000 
 127.212222 35.786222 141.000000 127.212222 35.786222 148.000000 
 127.212222 35.786333 149.000000 127.212222 35.786333 153.000000 
 127.212222 35.786444 154.000000 127.212222 35.786444 158.000000 
 127.212222 35.786556 158.000000 127.212222 35.786556 165.000000 
 127.212333 35.786556 157.000000 127.212333 35.786556 165.000000 
 127.212333 35.786667 164.000000 127.212333 35.786667 170.000000 
 127.212333 35.786778 169.000000 127.212333 35.786778 177.000000 
 127.212444 35.786778 168.000000 127.212444 35.786778 177.000000 
 127.212444 35.786889 175.000000 127.212444 35.786889 181.000000 
 127.212444 35.787000 179.000000 127.212444 35.787000 189.000000 
 127.212556 35.787000 177.000000 127.212556 35.787000 186.000000 
 127.212556 35.787111 184.000000 127.212556 35.787111 191.000000 
 127.212556 35.787222 188.000000 127.212556 35.787222 198.000000 
 127.212667 35.787222 187.000000 127.212667 35.787222 196.000000 
 127.212667 35.787333 194.000000 127.212667 35.787333 201.000000 
 127.212667 35.787444 198.000000 127.212667 35.787444 210.000000 
 127.212778 35.787444 195.000000 127.212778 35.787444 204.000000 
 127.212778 35.787556 198.000000 127.212778 35.787556 208.000000 
 127.212778 35.787667 201.000000 127.212778 35.787667 212.000000 
 127.212778 35.787778 204.000000 127.212778 35.787778 215.000000 
 127.212889 35.787778 197.000000 127.212889 35.787778 206.000000 
 127.212889 35.787889 198.000000 127.212889 35.787889 208.000000 
 127.212889 35.788000 200.000000 127.212889 35.788000 209.000000 
 127.213000 35.788000 193.000000 127.213000 35.788000 201.000000 
 127.213000 35.788111 193.000000 127.213000 35.788111 201.000000 
 127.213000 35.788222 194.000000 127.213000 35.788222 200.000000 
 127.213111 35.788222 188.000000 127.213111 35.788222 194.000000 
 127.213111 35.788333 188.000000 127.213111 35.788333 196.000000 
 127.213111 35.788444 192.000000 127.213111 35.788444 202.000000 
 127.213222 35.788444 188.000000 127.213222 35.788444 197.000000 
 127.213222 35.788556 191.000000 127.213222 35.788556 200.000000 
 127.213222 35.788667 193.000000 127.213222 35.788667 203.000000 
 127.213333 35.788778 189.000000 127.213333 35.788778 195.000000 
 127.213333 35.788889 190.000000 127.213333 35.788889 195.000000 
 127.213333 35.789000 195.000000 127.213333 35.789000 195.000000 
 127.213444 35.789000 196.000000 127.213444 35.789000 196.000000 
 127.213444 35.789111 202.000000 127.213444 35.789111 204.000000 
 127.213444 35.789222 210.000000 127.213444 35.789222 209.000000 
 127.213556 35.789222 215.000000 127.213556 35.789222 215.000000 
 127.213556 35.789333 221.000000 127.213556 35.789333 222.000000 
 127.213556 35.789444 229.000000 127.213556 35.789444 227.000000 
 127.213667 35.789444 234.000000 127.213667 35.789444 233.000000 
 127.213667 35.789556 240.000000 127.213667 35.789556 240.000000 
 127.213667 35.789667 246.000000 127.213667 35.789667 242.000000 
 127.213778 35.789667 253.000000 127.213778 35.789667 250.000000 
 127.213778 35.789778 256.000000 127.213778 35.789778 253.000000 
 127.213778 35.789889 259.000000 127.213778 35.789889 254.000000 
 127.213778 35.790000 259.000000 127.213778 35.790000 255.000000 
 127.213889 35.790000 260.000000 127.213889 35.790000 260.000000 
 127.213889 35.790111 260.000000 127.213889 35.790111 260.000000 
 127.213889 35.790222 260.000000 127.213889 35.790222 261.000000 
 127.214000 35.790222 257.000000 127.214000 35.790222 260.000000 
 127.214000 35.790333 256.000000 127.214000 35.790333 259.000000 
 127.214000 35.790444 253.000000 127.214000 35.790444 255.000000 
 127.214111 35.790444 246.000000 127.214111 35.790444 248.000000 
 127.214111 35.790556 241.000000 127.214111 35.790556 239.000000 
 127.214111 35.790667 232.000000 127.214111 35.790667 233.000000 
 127.214222 35.790667 225.000000 127.214222 35.790667 225.000000 
 127.214222 35.790778 218.000000 127.214222 35.790778 217.000000 
 127.214222 35.790889 215.000000 127.214222 35.790889 217.000000 
 127.214333 35.790889 213.000000 127.214333 35.790889 217.000000 
 127.214333 35.791000 216.000000 127.214333 35.791000 222.000000 
 127.214333 35.791111 221.000000 127.214333 35.791111 225.000000 
 127.214333 35.791222 224.000000 127.214333 35.791222 234.000000 
 127.214444 35.791222 223.000000 127.214444 35.791222 233.000000 
 127.214444 35.791333 232.000000 127.214444 35.791333 239.000000 
 127.214444 35.791444 238.000000 127.214444 35.791444 249.000000 
 127.214556 35.791444 239.000000 127.214556 35.791444 248.000000 
 127.214556 35.791556 247.000000 127.214556 35.791556 255.000000 
 127.214556 35.791667 254.000000 127.214556 35.791667 263.000000 
 127.214667 35.791667 255.000000 127.214667 35.791667 263.000000 
 127.214667 35.791778 264.000000 127.214667 35.791778 274.000000 
 127.214667 35.791889 270.000000 127.214667 35.791889 275.000000 
 127.214778 35.791889 263.000000 127.214778 35.791889 267.000000 
 127.214778 35.792000 260.000000 127.214778 35.792000 262.000000 
 127.214778 35.792111 254.000000 127.214778 35.792111 262.000000 
 127.214778 35.792222 254.000000 127.214778 35.792222 263.000000 
 127.214889 35.792222 245.000000 127.214889 35.792222 255.000000 
 127.214889 35.792333 247.000000 127.214889 35.792333 260.000000 
 127.214889 35.792444 253.000000 127.214889 35.792444 269.000000 
 127.215000 35.792444 246.000000 127.215000 35.792444 263.000000 
 127.215000 35.792556 257.000000 127.215000 35.792556 271.000000 
 127.215000 35.792667 265.000000 127.215000 35.792667 279.000000 
 127.215111 35.792667 261.000000 127.215111 35.792667 273.000000 
 127.215111 35.792778 269.000000 127.215111 35.792778 269.000000 
 127.215111 35.792889 264.000000 127.215111 35.792889 262.000000 
 127.215222 35.792889 260.000000 127.215222 35.792889 255.000000 
 127.215222 35.793000 250.000000 127.215222 35.793000 251.000000 
 127.215222 35.793111 246.000000 127.215222 35.793111 249.000000 
 127.215333 35.793111 241.000000 127.215333 35.793111 243.000000 
 127.215333 35.793222 237.000000 127.215333 35.793222 244.000000 
 127.215333 35.793333 238.000000 127.215333 35.793333 246.000000 
 127.215333 35.793444 241.000000 127.215333 35.793444 251.000000 
 127.215444 35.793444 235.000000 127.215444 35.793444 245.000000 
 127.215444 35.793556 240.000000 127.215444 35.793556 245.000000 
 127.215444 35.793667 239.000000 127.215444 35.793667 239.000000 
 127.215556 35.793667 234.000000 127.215556 35.793667 232.000000 
 127.215556 35.793778 225.000000 127.215556 35.793778 228.000000 
 127.215556 35.793889 219.000000 127.215556 35.793889 224.000000 
 127.215667 35.793889 216.000000 127.215667 35.793889 220.000000 
 127.215667 35.794000 220.000000 127.215667 35.794000 223.000000 
 127.215667 35.794111 224.000000 127.215667 35.794111 234.000000 
 127.215778 35.794111 227.000000 127.215778 35.794111 236.000000 
 127.215778 35.794222 238.000000 127.215778 35.794222 244.000000 
 127.215778 35.794333 246.000000 127.215778 35.794333 255.000000 
 127.215778 35.794444 255.000000 127.215778 35.794444 260.000000 
 127.215889 35.794444 254.000000 127.215889 35.794444 259.000000 
 127.215889 35.794556 256.000000 127.215889 35.794556 261.000000 
 127.215889 35.794667 255.000000 127.215889 35.794667 261.000000 
 127.216000 35.794667 249.000000 127.216000 35.794667 254.000000 
 127.216000 35.794778 248.000000 127.216000 35.794778 251.000000 
 127.216000 35.794889 245.000000 127.216000 35.794889 251.000000 
 127.216111 35.794889 240.000000 127.216111 35.794889 246.000000 
 127.216111 35.795000 240.000000 127.216111 35.795000 246.000000 
 127.216111 35.795111 239.000000 127.216111 35.795111 244.000000 
 127.216222 35.795111 238.000000 127.216222 35.795111 242.000000 
 127.216222 35.795222 241.000000 127.216222 35.795222 245.000000 
 127.216222 35.795333 247.000000 127.216222 35.795333 250.000000 
 127.216333 35.795333 254.000000 127.216333 35.795333 255.000000 
 127.216333 35.795444 262.000000 127.216333 35.795444 259.000000 
 127.216333 35.795556 266.000000 127.216333 35.795556 263.000000 
 127.216333 35.795667 270.000000 127.216333 35.795667 265.000000 
 127.216444 35.795667 278.000000 127.216444 35.795667 272.000000 
 127.216444 35.795778 280.000000 127.216444 35.795778 275.000000 
 127.216444 35.795889 284.000000 127.216444 35.795889 277.000000 
 127.216556 35.795889 293.000000 127.216556 35.795889 285.000000 
 127.216556 35.796000 293.000000 127.216556 35.796000 290.000000 
 127.216556 35.796111 297.000000 127.216556 35.796111 293.000000 
 127.216667 35.796111 308.000000 127.216667 35.796111 300.000000 
 127.216667 35.796222 310.000000 127.216667 35.796222 304.000000 
 127.216667 35.796333 314.000000 127.216667 35.796333 308.000000 
 127.216778 35.796333 319.000000 127.216778 35.796333 317.000000 
 127.216778 35.796444 323.000000 127.216778 35.796444 326.000000 
 127.216778 35.796556 330.000000 127.216778 35.796556 332.000000 
 127.216778 35.796667 334.000000 127.216778 35.796667 341.000000 
 127.216889 35.796667 329.000000 127.216889 35.796667 338.000000 
 127.216889 35.796778 332.000000 127.216889 35.796778 340.000000 
 127.216889 35.796889 334.000000 127.216889 35.796889 341.000000 
 127.217000 35.796889 326.000000 127.217000 35.796889 333.000000 
 127.217000 35.797000 326.000000 127.217000 35.797000 328.000000 
 127.217000 35.797111 320.000000 127.217000 35.797111 324.000000 
 127.217111 35.797111 311.000000 127.217111 35.797111 317.000000 
 127.217111 35.797222 308.000000 127.217111 35.797222 313.000000 
 127.217111 35.797333 306.000000 127.217111 35.797333 313.000000 
 127.217222 35.797333 299.000000 127.217222 35.797333 306.000000 
 127.217222 35.797444 299.000000 127.217222 35.797444 309.000000 
 127.217222 35.797556 303.000000 127.217222 35.797556 313.000000 
 127.217222 35.797667 308.000000 127.217222 35.797667 316.000000 
 127.217333 35.797667 303.000000 127.217333 35.797667 309.000000 
 127.217333 35.797778 303.000000 127.217333 35.797778 310.000000 
 127.217333 35.797889 304.000000 127.217333 35.797889 316.000000 
 127.217444 35.797889 298.000000 127.217444 35.797889 312.000000 
 127.217444 35.798000 307.000000 127.217444 35.798000 313.000000 
 127.217444 35.798111 308.000000 127.217444 35.798111 311.000000 
 127.217556 35.798111 303.000000 127.217556 35.798111 305.000000 
 127.217556 35.798222 301.000000 127.217556 35.798222 303.000000 
 127.217556 35.798333 298.000000 127.217556 35.798333 299.000000 
 127.217667 35.798333 292.000000 127.217667 35.798333 296.000000 
 127.217667 35.798444 293.000000 127.217667 35.798444 301.000000 
 127.217667 35.798556 300.000000 127.217667 35.798556 309.000000 
 127.217778 35.798667 306.000000 127.217778 35.798667 317.000000 
 127.217778 35.798778 314.000000 127.217778 35.798778 321.000000 
 127.217778 35.798889 316.000000 127.217778 35.798889 319.000000 
 127.217889 35.798889 309.000000 127.217889 35.798889 312.000000 
 127.217889 35.799000 306.000000 127.217889 35.799000 309.000000 
 127.217889 35.799111 304.000000 127.217889 35.799111 312.000000 
 127.218000 35.799111 299.000000 127.218000 35.799111 309.000000 
 127.218000 35.799222 305.000000 127.218000 35.799222 314.000000 
 127.218000 35.799333 312.000000 127.218000 35.799333 324.000000 
 127.218111 35.799333 308.000000 127.218111 35.799333 320.000000 
 127.218111 35.799444 314.000000 127.218111 35.799444 325.000000 
 127.218111 35.799556 317.000000 127.218111 35.799556 329.000000 
 127.218222 35.799556 311.000000 127.218222 35.799556 324.000000 
 127.218222 35.799667 320.000000 127.218222 35.799667 330.000000 
 127.218222 35.799778 326.000000 127.218222 35.799778 339.000000 
 127.218222 35.799889 335.000000 127.218222 35.799889 345.000000 
 127.218333 35.799889 334.000000 127.218333 35.799889 341.000000 
 127.218333 35.800000 341.000000 127.218333 35.800000 351.000000 
 127.218333 35.800111 352.000000 127.218333 35.800111 359.000000 
 127.218444 35.800111 356.000000 127.218444 35.800111 360.000000 
 127.218444 35.800222 363.000000 127.218444 35.800222 367.000000 
 127.218444 35.800333 369.000000 127.218444 35.800333 377.000000 
 127.218556 35.800333 373.000000 127.218556 35.800333 378.000000 
 127.218556 35.800444 381.000000 127.218556 35.800444 385.000000 
 127.218556 35.800556 385.000000 127.218556 35.800556 390.000000 
 127.218667 35.800556 382.000000 127.218667 35.800556 383.000000 
 127.218667 35.800667 376.000000 127.218667 35.800667 376.000000 
 127.218667 35.800778 370.000000 127.218667 35.800778 361.000000 
 127.218667 35.800889 355.000000 127.218667 35.800889 358.000000 
 127.218778 35.800889 352.000000 127.218778 35.800889 347.000000 
 127.218778 35.801000 343.000000 127.218778 35.801000 348.000000 
 127.218778 35.801111 341.000000 127.218778 35.801111 343.000000 
 127.218889 35.801111 334.000000 127.218889 35.801111 338.000000 
 127.218889 35.801222 333.000000 127.218889 35.801222 342.000000 
 127.218889 35.801333 335.000000 127.218889 35.801333 340.000000 
 127.219000 35.801333 330.000000 127.219000 35.801333 336.000000 
 127.219000 35.801444 334.000000 127.219000 35.801444 346.000000 
 127.219000 35.801556 345.000000 127.219000 35.801556 354.000000 
 127.219111 35.801556 342.000000 127.219111 35.801556 352.000000 
 127.219111 35.801667 349.000000 127.219111 35.801667 364.000000 
 127.219111 35.801778 362.000000 127.219111 35.801778 373.000000 
 127.219111 35.801889 371.000000 127.219111 35.801889 382.000000 
 127.219222 35.801889 368.000000 127.219222 35.801889 379.000000 
 127.219222 35.802000 374.000000 127.219222 35.802000 389.000000 
 127.219222 35.802111 381.000000 127.219222 35.802111 393.000000 
 127.219333 35.802111 373.000000 127.219333 35.802111 385.000000 
 127.219333 35.802222 377.000000 127.219333 35.802222 394.000000 
 127.219333 35.802333 388.000000 127.219333 35.802333 402.000000 
 127.219444 35.802333 383.000000 127.219444 35.802333 397.000000 
 127.219444 35.802444 388.000000 127.219444 35.802444 404.000000 
 127.219444 35.802556 394.000000 127.219444 35.802556 408.000000 
 127.219556 35.802556 381.000000 127.219556 35.802556 400.000000 
 127.219556 35.802667 388.000000 127.219556 35.802667 405.000000 
 127.219556 35.802778 396.000000 127.219556 35.802778 404.000000 
 127.219556 35.802889 400.000000 127.219556 35.802889 397.000000 
 127.219667 35.802889 391.000000 127.219667 35.802889 398.000000 
 127.219667 35.803000 395.000000 127.219667 35.803000 393.000000 
 127.219667 35.803111 395.000000 127.219667 35.803111 384.000000 
 127.219778 35.803111 395.000000 127.219778 35.803111 387.000000 
 127.219778 35.803222 390.000000 127.219778 35.803222 382.000000 
 127.219778 35.803333 385.000000 127.219778 35.803333 372.000000 
 127.219889 35.803333 388.000000 127.219889 35.803333 374.000000 
 127.219889 35.803444 377.000000 127.219889 35.803444 368.000000 
 127.219889 35.803556 371.000000 127.219889 35.803556 363.000000 
 127.220000 35.803556 375.000000 127.220000 35.803556 369.000000 
 127.220000 35.803667 375.000000 127.220000 35.803667 370.000000 
 127.220000 35.803778 376.000000 127.220000 35.803778 372.000000 
 127.220000 35.803889 378.000000 127.220000 35.803889 367.000000 
 127.220111 35.803889 381.000000 127.220111 35.803889 368.000000 
 127.220111 35.804000 368.000000 127.220111 35.804000 360.000000 
 127.220111 35.804111 360.000000 127.220111 35.804111 349.000000 
 127.220222 35.804111 361.000000 127.220222 35.804111 348.000000 
 127.220222 35.804222 350.000000 127.220222 35.804222 343.000000 
 127.220222 35.804333 347.000000 127.220222 35.804333 340.000000 
 127.220333 35.804333 353.000000 127.220333 35.804333 346.000000 
 127.220333 35.804444 354.000000 127.220333 35.804444 347.000000 
 127.220333 35.804556 354.000000 127.220333 35.804556 347.000000 
 127.220444 35.804556 363.000000 127.220444 35.804556 355.000000 
 127.220444 35.804667 363.000000 127.220444 35.804667 355.000000 
 127.220444 35.804778 362.000000 127.220444 35.804778 355.000000 
 127.220444 35.804889 359.000000 127.220444 35.804889 352.000000 
 127.220556 35.804889 360.000000 127.220556 35.804889 353.000000 
 127.220556 35.805000 353.000000 127.220556 35.805000 342.000000 
 127.220556 35.805111 342.000000 127.220556 35.805111 334.000000 
 127.220667 35.805111 342.000000 127.220667 35.805111 334.000000 
 127.220667 35.805222 335.000000 127.220667 35.805222 323.000000 
 127.220667 35.805333 324.000000 127.220667 35.805333 318.000000 
 127.220778 35.805333 326.000000 127.220778 35.805333 320.000000 
 127.220778 35.805444 325.000000 127.220778 35.805444 322.000000 
 127.220778 35.805556 329.000000 127.220778 35.805556 328.000000 
 127.220889 35.805556 336.000000 127.220889 35.805556 336.000000 
 127.220889 35.805667 343.000000 127.220889 35.805667 341.000000 
 127.220889 35.805778 348.000000 127.220889 35.805778 348.000000 
 127.220889 35.805889 351.000000 127.220889 35.805889 348.000000 
 127.221000 35.805889 354.000000 127.221000 35.805889 348.000000 
 127.221000 35.806000 346.000000 127.221000 35.806000 336.000000 
 127.221000 35.806111 334.000000 127.221000 35.806111 328.000000 
 127.221111 35.806111 332.000000 127.221111 35.806111 326.000000 
 127.221111 35.806222 324.000000 127.221111 35.806222 314.000000 
 127.221111 35.806333 313.000000 127.221111 35.806333 306.000000 
 127.221222 35.806333 313.000000 127.221222 35.806333 307.000000 
 127.221222 35.806444 309.000000 127.221222 35.806444 306.000000 
 127.221222 35.806556 312.000000 127.221222 35.806556 309.000000 
 127.221333 35.806556 317.000000 127.221333 35.806556 316.000000 
 127.221333 35.806667 322.000000 127.221333 35.806667 321.000000 
 127.221333 35.806778 327.000000 127.221333 35.806778 324.000000 
 127.221333 35.806889 328.000000 127.221333 35.806889 318.000000 
 127.221444 35.806889 331.000000 127.221444 35.806889 320.000000 
 127.221444 35.807000 321.000000 127.221444 35.807000 313.000000 
 127.221444 35.807111 313.000000 127.221444 35.807111 306.000000 
 127.221556 35.807111 314.000000 127.221556 35.807111 306.000000 
 127.221556 35.807222 307.000000 127.221556 35.807222 295.000000 
 127.221556 35.807333 296.000000 127.221556 35.807333 288.000000 
 127.221667 35.807333 297.000000 127.221667 35.807333 289.000000 
 127.221667 35.807444 291.000000 127.221667 35.807444 279.000000 
 127.221667 35.807556 282.000000 127.221667 35.807556 275.000000 
 127.221778 35.807556 284.000000 127.221778 35.807556 277.000000 
 127.221778 35.807667 280.000000 127.221778 35.807667 282.000000 
 127.221778 35.807778 286.000000 127.221778 35.807778 286.000000 
 127.221778 35.807889 290.000000 127.221778 35.807889 290.000000 
 127.221889 35.807889 294.000000 127.221889 35.807889 296.000000 
 127.221889 35.808000 301.000000 127.221889 35.808000 296.000000 
 127.221889 35.808111 303.000000 127.221889 35.808111 301.000000 
 127.222000 35.808111 310.000000 127.222000 35.808111 305.000000 
 127.222000 35.808222 311.000000 127.222000 35.808222 311.000000 
 127.222000 35.808333 313.000000 127.222000 35.808333 322.000000 
 127.222111 35.808333 319.000000 127.222111 35.808333 323.000000 
 127.222111 35.808444 323.000000 127.222111 35.808444 330.000000 
 127.222111 35.808556 330.000000 127.222111 35.808556 341.000000 
 127.222222 35.808556 332.000000 127.222222 35.808556 342.000000 
 127.222222 35.808667 343.000000 127.222222 35.808667 350.000000 
 127.222222 35.808778 350.000000 127.222222 35.808778 357.000000 
 127.222222 35.808889 357.000000 127.222222 35.808889 365.000000 
 127.222333 35.808889 358.000000 127.222333 35.808889 368.000000 
 127.222333 35.809000 369.000000 127.222333 35.809000 374.000000 
 127.222333 35.809111 377.000000 127.222333 35.809111 377.000000 
 127.222444 35.809111 380.000000 127.222444 35.809111 382.000000 
 127.222444 35.809222 386.000000 127.222444 35.809222 380.000000 
 127.222444 35.809333 385.000000 127.222444 35.809333 373.000000 
 127.222556 35.809333 390.000000 127.222556 35.809333 380.000000 
 127.222556 35.809444 385.000000 127.222556 35.809444 375.000000 
 127.222556 35.809556 381.000000 127.222556 35.809556 370.000000 
 127.222667 35.809556 383.000000 127.222667 35.809556 378.000000 
 127.222667 35.809667 380.000000 127.222667 35.809667 379.000000 
 127.222667 35.809778 380.000000 127.222667 35.809778 380.000000 
 127.222667 35.809889 380.000000 127.222667 35.809889 382.000000 
 127.222778 35.809889 373.000000 127.222778 35.809889 377.000000 
 127.222778 35.810000 370.000000 127.222778 35.810000 371.000000 
 127.222778 35.810111 364.000000 127.222778 35.810111 364.000000 
 127.222889 35.810111 356.000000 127.222889 35.810111 355.000000 
 127.222889 35.810222 349.000000 127.222889 35.810222 347.000000 
 127.222889 35.810333 342.000000 127.222889 35.810333 344.000000 
 127.223000 35.810333 336.000000 127.223000 35.810333 338.000000 
 127.223000 35.810444 332.000000 127.223000 35.810444 333.000000 
 127.223000 35.810556 327.000000 127.223000 35.810556 328.000000 
 127.223111 35.810556 321.000000 127.223111 35.810556 323.000000 
 127.223111 35.810667 318.000000 127.223111 35.810667 318.000000 
 127.223111 35.810778 314.000000 127.223111 35.810778 312.000000 
 127.223111 35.810889 307.000000 127.223111 35.810889 308.000000 
 127.223222 35.810889 302.000000 127.223222 35.810889 303.000000 
 127.223222 35.811000 299.000000 127.223222 35.811000 299.000000 
 127.223222 35.811111 295.000000 127.223222 35.811111 298.000000 
 127.223333 35.811111 291.000000 127.223333 35.811111 294.000000 
 127.223333 35.811222 290.000000 127.223333 35.811222 293.000000 
 127.223333 35.811333 287.000000 127.223333 35.811333 294.000000 
 127.223444 35.811333 283.000000 127.223444 35.811333 288.000000 
 127.223444 35.811444 282.000000 127.223444 35.811444 286.000000 
 127.223444 35.811556 280.000000 127.223444 35.811556 283.000000 
 127.223556 35.811556 274.000000 127.223556 35.811556 277.000000 
 127.223556 35.811667 272.000000 127.223556 35.811667 273.000000 
 127.223556 35.811778 269.000000 127.223556 35.811778 271.000000 
 127.223667 35.811889 262.000000 127.223667 35.811889 263.000000 
 127.223667 35.812000 259.000000 127.223667 35.812000 260.000000 
 127.223667 35.812111 257.000000 127.223667 35.812111 255.000000 
 127.223778 35.812111 253.000000 127.223778 35.812111 253.000000 
 127.223778 35.812222 250.000000 127.223778 35.812222 250.000000 
 127.223778 35.812333 247.000000 127.223778 35.812333 247.000000 
 127.223889 35.812333 243.000000 127.223889 35.812333 245.000000 
 127.223889 35.812444 240.000000 127.223889 35.812444 240.000000 
 127.223889 35.812556 236.000000 127.223889 35.812556 240.000000 
 127.224000 35.812556 235.000000 127.224000 35.812556 235.000000 
 127.224000 35.812667 234.000000 127.224000 35.812667 232.000000 
 127.224000 35.812778 231.000000 127.224000 35.812778 230.000000 
 127.224111 35.812889 232.000000 127.224111 35.812889 226.000000 
 127.224111 35.813000 230.000000 127.224111 35.813000 225.000000 
 127.224111 35.813111 228.000000 127.224111 35.813111 225.000000 
 127.224222 35.813111 231.000000 127.224222 35.813111 225.000000 
 127.224222 35.813222 228.000000 127.224222 35.813222 223.000000 
 127.224222 35.813333 226.000000 127.224222 35.813333 221.000000 
 127.224333 35.813333 231.000000 127.224333 35.813333 224.000000 
 127.224333 35.813444 228.000000 127.224333 35.813444 223.000000 
 127.224333 35.813556 227.000000 127.224333 35.813556 223.000000 
 127.224444 35.813556 232.000000 127.224444 35.813556 226.000000 
 127.224444 35.813667 230.000000 127.224444 35.813667 226.000000 
 127.224444 35.813778 229.000000 127.224444 35.813778 225.000000 
 127.224556 35.813778 232.000000 127.224556 35.813778 227.000000 
 127.224556 35.813889 230.000000 127.224556 35.813889 226.000000 
 127.224556 35.814000 228.000000 127.224556 35.814000 224.000000 
 127.224556 35.814111 226.000000 127.224556 35.814111 223.000000 
 127.224667 35.814111 229.000000 127.224667 35.814111 227.000000 
 127.224667 35.814222 232.000000 127.224667 35.814222 230.000000 
 127.224667 35.814333 235.000000 127.224667 35.814333 233.000000 
 127.224778 35.814333 241.000000 127.224778 35.814333 238.000000 
 127.224778 35.814444 244.000000 127.224778 35.814444 238.000000 
 127.224778 35.814556 244.000000 127.224778 35.814556 237.000000 
 127.224889 35.814556 250.000000 127.224889 35.814556 242.000000 
 127.224889 35.814667 248.000000 127.224889 35.814667 241.000000 
 127.224889 35.814778 247.000000 127.224889 35.814778 247.000000 
 127.225000 35.814778 253.000000 127.225000 35.814778 252.000000 
 127.225000 35.814889 258.000000 127.225000 35.814889 256.000000 
 127.225000 35.815000 261.000000 127.225000 35.815000 258.000000 
 127.225000 35.815111 264.000000 127.225000 35.815111 259.000000 
 127.225111 35.815111 271.000000 127.225111 35.815111 265.000000 
 127.225111 35.815222 270.000000 127.225111 35.815222 262.000000 
 127.225111 35.815333 264.000000 127.225111 35.815333 258.000000 
 127.225222 35.815333 264.000000 127.225222 35.815333 258.000000 
 127.225222 35.815444 257.000000 127.225222 35.815444 251.000000 
 127.225222 35.815556 248.000000 127.225222 35.815556 245.000000 
 127.225333 35.815556 249.000000 127.225333 35.815556 245.000000 
 127.225333 35.815667 250.000000 127.225333 35.815667 249.000000 
 127.225333 35.815778 253.000000 127.225333 35.815778 250.000000 
 127.225444 35.815778 255.000000 127.225444 35.815778 250.000000 
 127.225444 35.815889 250.000000 127.225444 35.815889 247.000000 
 127.225444 35.816000 247.000000 127.225444 35.816000 241.000000 
 127.225444 35.816111 242.000000 127.225444 35.816111 237.000000 
 127.225556 35.816111 244.000000 127.225556 35.816111 239.000000 
 127.225556 35.816222 240.000000 127.225556 35.816222 233.000000 
 127.225556 35.816333 235.000000 127.225556 35.816333 231.000000 
 127.225667 35.816333 236.000000 127.225667 35.816333 232.000000 
 127.225667 35.816444 233.000000 127.225667 35.816444 228.000000 
 127.225667 35.816556 229.000000 127.225667 35.816556 224.000000 
 127.225778 35.816556 230.000000 127.225778 35.816556 226.000000 
 127.225778 35.816667 227.000000 127.225778 35.816667 221.000000 
 127.225778 35.816778 223.000000 127.225778 35.816778 218.000000 
 127.225889 35.816778 225.000000 127.225889 35.816778 220.000000 
 127.225889 35.816889 222.000000 127.225889 35.816889 217.000000 
 127.225889 35.817000 220.000000 127.225889 35.817000 221.000000 
 127.225889 35.817111 222.000000 127.225889 35.817111 229.000000 
 127.226000 35.817111 224.000000 127.226000 35.817111 230.000000 
 127.226000 35.817222 232.000000 127.226000 35.817222 234.000000 
 127.226000 35.817333 238.000000 127.226000 35.817333 240.000000 
 127.226111 35.817333 241.000000 127.226111 35.817333 247.000000 
 127.226111 35.817444 251.000000 127.226111 35.817444 254.000000 
 127.226111 35.817556 258.000000 127.226111 35.817556 260.000000 
 127.226222 35.817556 261.000000 127.226222 35.817556 264.000000 
 127.226222 35.817667 267.000000 127.226222 35.817667 273.000000 
 127.226222 35.817778 276.000000 127.226222 35.817778 278.000000 
 127.226333 35.817778 279.000000 127.226333 35.817778 282.000000 
 127.226333 35.817889 285.000000 127.226333 35.817889 289.000000 
 127.226333 35.818000 292.000000 127.226333 35.818000 293.000000 
 127.226444 35.818000 291.000000 127.226444 35.818000 297.000000 
 127.226444 35.818111 296.000000 127.226444 35.818111 302.000000 
 127.226444 35.818222 302.000000 127.226444 35.818222 304.000000 
 127.226444 35.818333 305.000000 127.226444 35.818333 300.000000 
 127.226556 35.818333 304.000000 127.226556 35.818333 302.000000 
 127.226556 35.818444 302.000000 127.226556 35.818444 297.000000 
 127.226556 35.818556 297.000000 127.226556 35.818556 291.000000 
 127.226667 35.818556 297.000000 127.226667 35.818556 290.000000 
 127.226667 35.818667 289.000000 127.226667 35.818667 283.000000 
 127.226667 35.818778 283.000000 127.226667 35.818778 275.000000 
 127.226778 35.818778 283.000000 127.226778 35.818778 275.000000 
 127.226778 35.818889 276.000000 127.226778 35.818889 269.000000 
 127.226778 35.819000 269.000000 127.226778 35.819000 260.000000 
 127.226889 35.819000 271.000000 127.226889 35.819000 260.000000 
 127.226889 35.819111 263.000000 127.226889 35.819111 256.000000 
 127.226889 35.819222 258.000000 127.226889 35.819222 252.000000 
 127.226889 35.819333 254.000000 127.226889 35.819333 247.000000 
 127.227000 35.819333 259.000000 127.227000 35.819333 250.000000 
 127.227000 35.819444 256.000000 127.227000 35.819444 249.000000 
 127.227000 35.819556 255.000000 127.227000 35.819556 245.000000 
 127.227111 35.819556 257.000000 127.227111 35.819556 249.000000 
 127.227111 35.819667 253.000000 127.227111 35.819667 245.000000 
 127.227111 35.819778 248.000000 127.227111 35.819778 242.000000 
 127.227222 35.819778 250.000000 127.227222 35.819778 243.000000 
 127.227222 35.819889 245.000000 127.227222 35.819889 240.000000 
 127.227222 35.820000 242.000000 127.227222 35.820000 236.000000 
 127.227333 35.820000 245.000000 127.227333 35.820000 240.000000 
 127.227333 35.820111 242.000000 127.227333 35.820111 240.000000 
 127.227333 35.820222 242.000000 127.227333 35.820222 246.000000 
 127.227444 35.820222 244.000000 127.227444 35.820222 247.000000 
 127.227444 35.820333 248.000000 127.227444 35.820333 251.000000 
 127.227444 35.820444 253.000000 127.227444 35.820444 258.000000 
 127.227444 35.820556 259.000000 127.227444 35.820556 261.000000 
 127.227556 35.820556 261.000000 127.227556 35.820556 263.000000 
 127.227556 35.820667 265.000000 127.227556 35.820667 269.000000 
 127.227556 35.820778 272.000000 127.227556 35.820778 274.000000 
 127.227667 35.820778 276.000000 127.227667 35.820778 278.000000 
 127.227667 35.820889 284.000000 127.227667 35.820889 284.000000 
 127.227667 35.821000 289.000000 127.227667 35.821000 288.000000 
 127.227778 35.821000 294.000000 127.227778 35.821000 294.000000 
 127.227778 35.821111 299.000000 127.227778 35.821111 296.000000 
 127.227778 35.821222 302.000000 127.227778 35.821222 301.000000 
 127.227889 35.821222 308.000000 127.227889 35.821222 307.000000 
 127.227889 35.821333 313.000000 127.227889 35.821333 311.000000 
 127.227889 35.821444 317.000000 127.227889 35.821444 314.000000 
 127.227889 35.821556 321.000000 127.227889 35.821556 317.000000 
 127.228000 35.821556 328.000000 127.228000 35.821556 321.000000 
 127.228000 35.821667 330.000000 127.228000 35.821667 330.000000 
 127.228000 35.821778 337.000000 127.228000 35.821778 338.000000 
 127.228111 35.821778 345.000000 127.228111 35.821778 344.000000 
 127.228111 35.821889 351.000000 127.228111 35.821889 355.000000 
 127.228111 35.822000 358.000000 127.228111 35.822000 357.000000 
 127.228222 35.822000 361.000000 127.228222 35.822000 360.000000 
 127.228222 35.822111 360.000000 127.228222 35.822111 354.000000 
 127.228222 35.822222 354.000000 127.228222 35.822222 348.000000 
 127.228333 35.822222 353.000000 127.228333 35.822222 348.000000 
 127.228333 35.822333 348.000000 127.228333 35.822333 339.000000 
 127.228333 35.822444 338.000000 127.228333 35.822444 333.000000 
 127.228444 35.822444 338.000000 127.228444 35.822444 332.000000 
 127.228444 35.822556 333.000000 127.228444 35.822556 326.000000 
 127.228444 35.822667 327.000000 127.228444 35.822667 317.000000 
 127.228444 35.822778 322.000000 127.228444 35.822778 313.000000 
 127.228556 35.822778 327.000000 127.228556 35.822778 318.000000 
 127.228556 35.822889 323.000000 127.228556 35.822889 312.000000 
 127.228556 35.823000 316.000000 127.228556 35.823000 308.000000 
 127.228667 35.823000 318.000000 127.228667 35.823000 312.000000 
 127.228667 35.823111 312.000000 127.228667 35.823111 303.000000 
 127.228667 35.823222 303.000000 127.228667 35.823222 297.000000 
 127.228778 35.823222 302.000000 127.228778 35.823222 296.000000 
 127.228778 35.823333 294.000000 127.228778 35.823333 288.000000 
 127.228778 35.823444 284.000000 127.228778 35.823444 284.000000 
 127.228889 35.823444 280.000000 127.228889 35.823444 281.000000 
 127.228889 35.823556 277.000000 127.228889 35.823556 275.000000 
 127.228889 35.823667 272.000000 127.228889 35.823667 268.000000 
 127.228889 35.823778 267.000000 127.228889 35.823778 257.000000 
 127.229000 35.823778 264.000000 127.229000 35.823778 255.000000 
 127.229000 35.823889 255.000000 127.229000 35.823889 248.000000 
 127.229000 35.824000 248.000000 127.229000 35.824000 240.000000 
 127.229111 35.824000 247.000000 127.229111 35.824000 240.000000 
 127.229111 35.824111 239.000000 127.229111 35.824111 233.000000 
 127.229111 35.824222 235.000000 127.229111 35.824222 227.000000 
 127.229222 35.824222 236.000000 127.229222 35.824222 229.000000 
 127.229222 35.824333 230.000000 127.229222 35.824333 225.000000 
 127.229222 35.824444 226.000000 127.229222 35.824444 225.000000 
 127.229333 35.824444 230.000000 127.229333 35.824444 227.000000 
 127.229333 35.824556 233.000000 127.229333 35.824556 230.000000 
 127.229333 35.824667 234.000000 127.229333 35.824667 230.000000 
 127.229444 35.824667 240.000000 127.229444 35.824667 234.000000 
 127.229444 35.824778 239.000000 127.229444 35.824778 236.000000 
 127.229444 35.824889 240.000000 127.229444 35.824889 243.000000 
 127.229444 35.825000 246.000000 127.229444 35.825000 251.000000 
 127.229556 35.825000 247.000000 127.229556 35.825000 256.000000 
 127.229556 35.825111 260.000000 127.229556 35.825111 260.000000 
 127.229556 35.825222 266.000000 127.229556 35.825222 264.000000 
 127.229667 35.825222 270.000000 127.229667 35.825222 271.000000 
 127.229667 35.825333 277.000000 127.229667 35.825333 269.000000 
 127.229667 35.825444 275.000000 127.229667 35.825444 266.000000 
 127.229778 35.825444 282.000000 127.229778 35.825444 273.000000 
 127.229778 35.825556 281.000000 127.229778 35.825556 273.000000 
 127.229778 35.825667 280.000000 127.229778 35.825667 278.000000 
 127.229889 35.825667 288.000000 127.229889 35.825667 285.000000 
 127.229889 35.825778 291.000000 127.229889 35.825778 289.000000 
 127.229889 35.825889 295.000000 127.229889 35.825889 297.000000 
 127.230000 35.826000 312.000000 127.230000 35.826000 311.000000 
 127.230000 35.826111 316.000000 127.230000 35.826111 315.000000 
 127.230000 35.826222 315.000000 127.230000 35.826222 311.000000 
 127.230111 35.826222 312.000000 127.230111 35.826222 304.000000 
 127.230111 35.826333 300.000000 127.230111 35.826333 299.000000 
 127.230111 35.826444 294.000000 127.230111 35.826444 289.000000 
 127.230222 35.826444 289.000000 127.230222 35.826444 284.000000 
 127.230222 35.826556 279.000000 127.230222 35.826556 278.000000 
 127.230222 35.826667 273.000000 127.230222 35.826667 270.000000 
 127.230333 35.826667 271.000000 127.230333 35.826667 266.000000 
 127.230333 35.826778 263.000000 127.230333 35.826778 261.000000 
 127.230333 35.826889 258.000000 127.230333 35.826889 253.000000 
 127.230444 35.826889 260.000000 127.230444 35.826889 250.000000 
 127.230444 35.827000 253.000000 127.230444 35.827000 246.000000 
 127.230444 35.827111 248.000000 127.230444 35.827111 240.000000 
 127.230444 35.827222 242.000000 127.230444 35.827222 236.000000 
 127.230556 35.827222 243.000000 127.230556 35.827222 238.000000 
 127.230556 35.827333 240.000000 127.230556 35.827333 232.000000 
 127.230556 35.827444 238.000000 127.230556 35.827444 232.000000 
 127.230667 35.827444 242.000000 127.230667 35.827444 237.000000 
 127.230667 35.827556 244.000000 127.230667 35.827556 238.000000 
 127.230667 35.827667 242.000000 127.230667 35.827667 241.000000 
 127.230778 35.827667 248.000000 127.230778 35.827667 245.000000 
 127.230778 35.827778 249.000000 127.230778 35.827778 249.000000 
 127.230778 35.827889 253.000000 127.230778 35.827889 254.000000 
 127.230889 35.827889 260.000000 127.230889 35.827889 259.000000 
 127.230889 35.828000 264.000000 127.230889 35.828000 260.000000 
 127.230889 35.828111 266.000000 127.230889 35.828111 257.000000 
 127.231000 35.828111 272.000000 127.231000 35.828111 264.000000 
 127.231000 35.828222 272.000000 127.231000 35.828222 262.000000 
 127.231000 35.828333 269.000000 127.231000 35.828333 258.000000 
 127.231000 35.828444 264.000000 127.231000 35.828444 262.000000 
 127.231111 35.828444 270.000000 127.231111 35.828444 267.000000 
 127.231111 35.828556 272.000000 127.231111 35.828556 271.000000 
 127.231111 35.828667 278.000000 127.231111 35.828667 270.000000 
 127.231222 35.828667 284.000000 127.231222 35.828667 277.000000 
 127.231222 35.828778 284.000000 127.231222 35.828778 273.000000 
 127.231222 35.828889 280.000000 127.231222 35.828889 275.000000 
 127.231333 35.828889 287.000000 127.231333 35.828889 281.000000 
 127.231333 35.829000 286.000000 127.231333 35.829000 292.000000 
 127.231333 35.829111 296.000000 127.231333 35.829111 300.000000 
 127.231444 35.829111 300.000000 127.231444 35.829111 303.000000 
 127.231444 35.829222 307.000000 127.231444 35.829222 314.000000 
 127.231444 35.829333 318.000000 127.231444 35.829333 321.000000 
 127.231556 35.829333 323.000000 127.231556 35.829333 325.000000 
 127.231556 35.829444 332.000000 127.231556 35.829444 334.000000 
 127.231556 35.829556 340.000000 127.231556 35.829556 346.000000 
 127.231556 35.829667 356.000000 127.231556 35.829667 352.000000 
 127.231667 35.829667 360.000000 127.231667 35.829667 355.000000 
 127.231667 35.829778 355.000000 127.231667 35.829778 345.000000 
 127.231667 35.829889 341.000000 127.231667 35.829889 337.000000 
 127.231778 35.829889 337.000000 127.231778 35.829889 333.000000 
 127.231778 35.830000 329.000000 127.231778 35.830000 322.000000 
 127.231778 35.830111 319.000000 127.231778 35.830111 317.000000 
 127.231889 35.830111 318.000000 127.231889 35.830111 313.000000 
 127.231889 35.830222 311.000000 127.231889 35.830222 305.000000 
 127.231889 35.830333 301.000000 127.231889 35.830333 299.000000 
 127.232000 35.830333 303.000000 127.232000 35.830333 296.000000 
 127.232000 35.830444 297.000000 127.232000 35.830444 289.000000 
 127.232000 35.830556 289.000000 127.232000 35.830556 284.000000 
 127.232111 35.830667 287.000000 127.232111 35.830667 278.000000 
 127.232111 35.830778 283.000000 127.232111 35.830778 276.000000 
 127.232111 35.830889 283.000000 127.232111 35.830889 276.000000 
 127.232222 35.830889 290.000000 127.232222 35.830889 284.000000 
 127.232222 35.831000 291.000000 127.232222 35.831000 284.000000 
 127.232222 35.831111 290.000000 127.232222 35.831111 283.000000 
 127.232333 35.831111 294.000000 127.232333 35.831111 285.000000 
 127.232333 35.831222 283.000000 127.232333 35.831222 278.000000 
 127.232333 35.831333 275.000000 127.232333 35.831333 271.000000 
 127.232444 35.831333 274.000000 127.232444 35.831333 269.000000 
 127.232444 35.831444 271.000000 127.232444 35.831444 264.000000 
 127.232444 35.831556 267.000000 127.232444 35.831556 262.000000 
 127.232556 35.831556 271.000000 127.232556 35.831556 266.000000 
 127.232556 35.831667 270.000000 127.232556 35.831667 266.000000 
 127.232556 35.831778 271.000000 127.232556 35.831778 268.000000 
 127.232556 35.831889 273.000000 127.232556 35.831889 274.000000 
 127.232667 35.831889 279.000000 127.232667 35.831889 278.000000 
 127.232667 35.832000 283.000000 127.232667 35.832000 281.000000 
 127.232667 35.832111 286.000000 127.232667 35.832111 283.000000 
 127.232778 35.832111 290.000000 127.232778 35.832111 287.000000 
 127.232778 35.832222 290.000000 127.232778 35.832222 284.000000 
 127.232778 35.832333 287.000000 127.232778 35.832333 278.000000 
 127.232889 35.832333 289.000000 127.232889 35.832333 280.000000 
 127.232889 35.832444 280.000000 127.232889 35.832444 273.000000 
 127.232889 35.832556 273.000000 127.232889 35.832556 263.000000 
 127.233000 35.832556 276.000000 127.233000 35.832556 266.000000 
 127.233000 35.832667 271.000000 127.233000 35.832667 263.000000 
 127.233000 35.832778 268.000000 127.233000 35.832778 259.000000 
 127.233111 35.832778 274.000000 127.233111 35.832778 265.000000 
 127.233111 35.832889 271.000000 127.233111 35.832889 262.000000 
 127.233111 35.833000 269.000000 127.233111 35.833000 261.000000 
 127.233111 35.833111 268.000000 127.233111 35.833111 263.000000 
 127.233222 35.833111 274.000000 127.233222 35.833111 269.000000 
 127.233222 35.833222 275.000000 127.233222 35.833222 270.000000 
 127.233222 35.833333 276.000000 127.233222 35.833333 273.000000 
 127.233333 35.833333 282.000000 127.233333 35.833333 278.000000 
 127.233333 35.833444 284.000000 127.233333 35.833444 281.000000 
 127.233333 35.833556 286.000000 127.233333 35.833556 285.000000 
 127.233444 35.833556 291.000000 127.233444 35.833556 289.000000 
 127.233444 35.833667 294.000000 127.233444 35.833667 291.000000 
 127.233444 35.833778 295.000000 127.233444 35.833778 285.000000 
 127.233556 35.833778 299.000000 127.233556 35.833778 290.000000 
 127.233556 35.833889 295.000000 127.233556 35.833889 287.000000 
 127.233556 35.834000 292.000000 127.233556 35.834000 285.000000 
 127.233667 35.834000 298.000000 127.233667 35.834000 291.000000 
 127.233667 35.834111 297.000000 127.233667 35.834111 292.000000 
 127.233667 35.834222 298.000000 127.233667 35.834222 293.000000 
 127.233667 35.834333 299.000000 127.233667 35.834333 294.000000 
 127.233778 35.834333 307.000000 127.233778 35.834333 300.000000 
 127.233778 35.834444 308.000000 127.233778 35.834444 304.000000 
 127.233778 35.834556 310.000000 127.233778 35.834556 305.000000 
 127.233889 35.834556 317.000000 127.233889 35.834556 312.000000 
 127.233889 35.834667 319.000000 127.233889 35.834667 314.000000 
 127.233889 35.834778 320.000000 127.233889 35.834778 318.000000 
 127.234000 35.834778 327.000000 127.234000 35.834778 324.000000 
 127.234000 35.834889 330.000000 127.234000 35.834889 327.000000 
 127.234000 35.835000 333.000000 127.234000 35.835000 334.000000 
 127.234111 35.835000 340.000000 127.234111 35.835000 339.000000 
 127.234111 35.835111 344.000000 127.234111 35.835111 343.000000 
 127.234111 35.835222 345.000000 127.234111 35.835222 349.000000 
 127.234222 35.835222 343.000000 127.234222 35.835222 346.000000 
 127.234222 35.835333 340.000000 127.234222 35.835333 344.000000 
 127.234222 35.835444 338.000000 127.234222 35.835444 343.000000 
 127.234222 35.835556 335.000000 127.234222 35.835556 343.000000 
 127.234333 35.835556 326.000000 127.234333 35.835556 334.000000 
 127.234333 35.835667 326.000000 127.234333 35.835667 333.000000 
 127.234333 35.835778 327.000000 127.234333 35.835778 334.000000 
 127.234444 35.835778 319.000000 127.234444 35.835778 328.000000 
 127.234444 35.835889 319.000000 127.234444 35.835889 330.000000 
 127.234444 35.836000 322.000000 127.234444 35.836000 333.000000 
 127.234556 35.836000 317.000000 127.234556 35.836000 327.000000 
 127.234556 35.836111 321.000000 127.234556 35.836111 332.000000 
 127.234556 35.836222 327.000000 127.234556 35.836222 329.000000 
 127.234667 35.836222 319.000000 127.234667 35.836222 324.000000 
 127.234667 35.836333 318.000000 127.234667 35.836333 317.000000 
 127.234667 35.836444 312.000000 127.234667 35.836444 305.000000 
 127.234778 35.836444 310.000000 127.234778 35.836444 304.000000 
 127.234778 35.836556 303.000000 127.234778 35.836556 295.000000 
 127.234778 35.836667 295.000000 127.234778 35.836667 283.000000 
 127.234778 35.836778 283.000000 127.234778 35.836778 275.000000 
 127.234889 35.836778 283.000000 127.234889 35.836778 274.000000 
 127.234889 35.836889 274.000000 127.234889 35.836889 265.000000 
 127.234889 35.837000 264.000000 127.234889 35.837000 258.000000 
 127.235000 35.837000 264.000000 127.235000 35.837000 257.000000 
 127.235000 35.837111 257.000000 127.235000 35.837111 247.000000 
 127.235000 35.837222 247.000000 127.235000 35.837222 243.000000 
 127.235111 35.837222 246.000000 127.235111 35.837222 241.000000 
 127.235111 35.837333 240.000000 127.235111 35.837333 235.000000 
 127.235111 35.837444 231.000000 127.235111 35.837444 235.000000 
 127.235222 35.837444 230.000000 127.235222 35.837444 228.000000 
 127.235222 35.837556 225.000000 127.235222 35.837556 231.000000 
 127.235222 35.837667 224.000000 127.235222 35.837667 234.000000 
 127.235333 35.837667 217.000000 127.235333 35.837667 227.000000 
 127.235333 35.837778 220.000000 127.235333 35.837778 227.000000 
 127.235333 35.837889 221.000000 127.235333 35.837889 227.000000 
 127.235333 35.838000 220.000000 127.235333 35.838000 229.000000 
 127.235444 35.838000 214.000000 127.235444 35.838000 224.000000 
 127.235444 35.838111 219.000000 127.235444 35.838111 228.000000 
 127.235444 35.838222 224.000000 127.235444 35.838222 231.000000 
 127.235556 35.838222 217.000000 127.235556 35.838222 226.000000 
 127.235556 35.838333 218.000000 127.235556 35.838333 226.000000 
 127.235556 35.838444 220.000000 127.235556 35.838444 228.000000 
 127.235667 35.838444 214.000000 127.235667 35.838444 222.000000 
 127.235667 35.838556 217.000000 127.235667 35.838556 228.000000 
 127.235667 35.838667 223.000000 127.235667 35.838667 225.000000 
 127.235778 35.838667 217.000000 127.235778 35.838667 223.000000 
 127.235778 35.838778 220.000000 127.235778 35.838778 215.000000 
 127.235778 35.838889 215.000000 127.235778 35.838889 209.000000 
 127.235778 35.839000 209.000000 127.235778 35.839000 200.000000 
 127.235889 35.839000 209.000000 127.235889 35.839000 200.000000 
 127.235889 35.839111 200.000000 127.235889 35.839111 194.000000 
 127.235889 35.839222 194.000000 127.235889 35.839222 185.000000 
 127.236000 35.839222 194.000000 127.236000 35.839222 185.000000 
 127.236000 35.839333 184.000000 127.236000 35.839333 179.000000 
 127.236000 35.839444 177.000000 127.236000 35.839444 174.000000 
 127.236111 35.839444 177.000000 127.236111 35.839444 171.000000 
 127.236111 35.839556 170.000000 127.236111 35.839556 170.000000 
 127.236111 35.839667 168.000000 127.236111 35.839667 171.000000 
 127.236222 35.839667 165.000000 127.236222 35.839667 168.000000 
 127.236222 35.839778 164.000000 127.236222 35.839778 169.000000 
 127.236222 35.839889 165.000000 127.236222 35.839889 170.000000 
 127.236333 35.839889 161.000000 127.236333 35.839889 166.000000 
 127.236333 35.840000 163.000000 127.236333 35.840000 167.000000 
 127.236333 35.840111 163.000000 127.236333 35.840111 169.000000 
 127.236333 35.840222 166.000000 127.236333 35.840222 176.000000 
 127.236444 35.840222 163.000000 127.236444 35.840222 173.000000 
 127.236444 35.840333 169.000000 127.236444 35.840333 177.000000 
 127.236444 35.840444 174.000000 127.236444 35.840444 183.000000 
 127.236556 35.840444 170.000000 127.236556 35.840444 180.000000 
 127.236556 35.840556 176.000000 127.236556 35.840556 181.000000 
 127.236556 35.840667 179.000000 127.236556 35.840667 171.000000 
 127.236667 35.840667 175.000000 127.236667 35.840667 168.000000 
 127.236667 35.840778 166.000000 127.236667 35.840778 163.000000 
 127.236667 35.840889 160.000000 127.236667 35.840889 158.000000 
 127.236778 35.840889 157.000000 127.236778 35.840889 154.000000 
 127.236778 35.841000 149.000000 127.236778 35.841000 152.000000 
 127.236778 35.841111 147.000000 127.236778 35.841111 147.000000 
 127.236889 35.841111 143.000000 127.236889 35.841111 144.000000 
 127.236889 35.841222 139.000000 127.236889 35.841222 141.000000 
 127.236889 35.841333 137.000000 127.236889 35.841333 135.000000 
 127.236889 35.841444 133.000000 127.236889 35.841444 134.000000 
 127.237000 35.841444 132.000000 127.237000 35.841444 131.000000 
 127.237000 35.841556 130.000000 127.237000 35.841556 131.000000 
 127.237000 35.841667 128.000000 127.237000 35.841667 131.000000 
 127.237111 35.841667 126.000000 127.237111 35.841667 127.000000 
 127.237111 35.841778 123.000000 127.237111 35.841778 127.000000 
 127.237111 35.841889 123.000000 127.237111 35.841889 128.000000 
 127.237222 35.841889 121.000000 127.237222 35.841889 125.000000 
 127.237222 35.842000 122.000000 127.237222 35.842000 123.000000 
 127.237222 35.842111 120.000000 127.237222 35.842111 120.000000 
 127.237333 35.842111 118.000000 127.237333 35.842111 117.000000 
 127.237333 35.842222 114.000000 127.237333 35.842222 115.000000 
 127.237333 35.842333 112.000000 127.237333 35.842333 114.000000 
 127.237444 35.842333 110.000000 127.237444 35.842333 111.000000 
 127.237444 35.842444 110.000000 127.237444 35.842444 113.000000 
 127.237444 35.842556 111.000000 127.237444 35.842556 115.000000 
 127.237444 35.842667 113.000000 127.237444 35.842667 114.000000 
 127.237556 35.842667 110.000000 127.237556 35.842667 112.000000 
 127.237556 35.842778 110.000000 127.237556 35.842778 108.000000 
 127.237556 35.842889 107.000000 127.237556 35.842889 105.000000 
 127.237667 35.842889 105.000000 127.237667 35.842889 105.000000 
 127.237667 35.843000 105.000000 127.237667 35.843000 104.000000 
 127.237667 35.843111 101.000000 127.237667 35.843111 105.000000 
 127.237778 35.843111 101.000000 127.237778 35.843111 102.000000 
 127.237778 35.843222 100.000000 127.237778 35.843222 105.000000 
 127.237778 35.843333 101.000000 127.237778 35.843333 106.000000 
 127.237889 35.843333 97.000000 127.237889 35.843333 104.000000 
 127.237889 35.843444 99.000000 127.237889 35.843444 103.000000 
 127.237889 35.843556 100.000000 127.237889 35.843556 103.000000 
 127.238000 35.843556 97.000000 127.238000 35.843556 101.000000 
 127.238000 35.843667 100.000000 127.238000 35.843667 100.000000 
 127.238000 35.843778 99.000000 127.238000 35.843778 99.000000 
 127.238000 35.843889 97.000000 127.238000 35.843889 98.000000 
 127.238111 35.843889 96.000000 127.238111 35.843889 96.000000 
 127.238111 35.844000 94.000000 127.238111 35.844000 95.000000 
 127.238111 35.844111 93.000000 127.238111 35.844111 95.000000 
 127.238222 35.844111 91.000000 127.238222 35.844111 93.000000 
 127.238222 35.844222 90.000000 127.238222 35.844222 90.000000 
 127.238222 35.844333 89.000000 127.238222 35.844333 90.000000 
 127.238333 35.844333 88.000000 127.238333 35.844333 88.000000 
 127.238333 35.844444 87.000000 127.238333 35.844444 88.000000 
 127.238333 35.844556 86.000000 127.238333 35.844556 87.000000 
 127.238444 35.844556 85.000000 127.238444 35.844556 85.000000 
 127.238444 35.844667 85.000000 127.238444 35.844667 84.000000 
 127.238444 35.844778 84.000000 127.238444 35.844778 84.000000 
 127.238556 35.844778 84.000000 127.238556 35.844778 84.000000 
 127.238556 35.844889 84.000000 127.238556 35.844889 83.000000 
 127.238556 35.845000 83.000000 127.238556 35.845000 83.000000 
 127.238556 35.845111 83.000000 127.238556 35.845111 83.000000 
 127.238667 35.845111 83.000000 127.238667 35.845111 83.000000 
 127.238667 35.845222 83.000000 127.238667 35.845222 82.000000 
 127.238667 35.845333 82.000000 127.238667 35.845333 81.000000 
 127.238778 35.845333 82.000000 127.238778 35.845333 82.000000 
 127.238778 35.845444 82.000000 127.238778 35.845444 81.000000 
 127.238778 35.845556 81.000000 127.238778 35.845556 80.000000 
 127.238889 35.845556 81.000000 127.238889 35.845556 81.000000 
 127.238889 35.845667 81.000000 127.238889 35.845667 80.000000 
 127.238889 35.845778 81.000000 127.238889 35.845778 80.000000 
 127.239000 35.845778 81.000000 127.239000 35.845778 80.000000 
 127.239000 35.845889 81.000000 127.239000 35.845889 80.000000 
 127.239000 35.846000 80.000000 127.239000 35.846000 80.000000 
 127.239111 35.846000 80.000000 127.239111 35.846000 80.000000 
 127.239111 35.846111 80.000000 127.239111 35.846111 80.000000 
 127.239111 35.846222 80.000000 127.239111 35.846222 80.000000 
 127.239111 35.846333 80.000000 127.239111 35.846333 80.000000 
 127.239222 35.846333 80.000000 127.239222 35.846333 80.000000 
 127.239222 35.846444 80.000000 127.239222 35.846444 80.000000 
 127.239222 35.846556 80.000000 127.239222 35.846556 80.000000 
 127.239333 35.846556 80.000000 127.239333 35.846556 80.000000 
 127.239333 35.846667 80.000000 127.239333 35.846667 80.000000 
 127.239333 35.846778 80.000000 127.239333 35.846778 80.000000 
 127.239444 35.846778 80.000000 127.239444 35.846778 80.000000 
 127.239444 35.846889 80.000000 127.239444 35.846889 80.000000 
 127.239444 35.847000 79.000000 127.239444 35.847000 79.000000 
 127.239556 35.847000 79.000000 127.239556 35.847000 79.000000 
 127.239556 35.847111 79.000000 127.239556 35.847111 78.000000 
 127.239556 35.847222 79.000000 127.239556 35.847222 78.000000 
 127.239667 35.847222 79.000000 127.239667 35.847222 78.000000 
 127.239667 35.847333 79.000000 127.239667 35.847333 78.000000 
 127.239667 35.847444 78.000000 127.239667 35.847444 78.000000 
 127.239667 35.847556 78.000000 127.239667 35.847556 78.000000 
 127.239778 35.847556 79.000000 127.239778 35.847556 78.000000 
 127.239778 35.847667 79.000000 127.239778 35.847667 78.000000 
 127.239778 35.847778 78.000000 127.239778 35.847778 78.000000 
 127.239889 35.847778 79.000000 127.239889 35.847778 78.000000 
 127.239889 35.847889 78.000000 127.239889 35.847889 78.000000 
 127.239889 35.848000 78.000000 127.239889 35.848000 77.000000 
 127.240000 35.848000 79.000000 127.240000 35.848000 78.000000 
 127.240000 35.848111 78.000000 127.240000 35.848111 77.000000 
 127.240000 35.848222 78.000000 127.240000 35.848222 77.000000 
 127.240111 35.848222 79.000000 127.240111 35.848222 78.000000 
 127.240111 35.848333 78.000000 127.240111 35.848333 77.000000 
 127.240111 35.848444 78.000000 127.240111 35.848444 77.000000 
 127.240222 35.848444 78.000000 127.240222 35.848444 77.000000 
 127.240222 35.848556 78.000000 127.240222 35.848556 77.000000 
 127.240222 35.848667 77.000000 127.240222 35.848667 77.000000 
 127.240333 35.848778 78.000000 127.240333 35.848778 77.000000 
 127.240333 35.848889 77.000000 127.240333 35.848889 76.000000 
 127.240333 35.849000 77.000000 127.240333 35.849000 75.000000 
 127.240444 35.849000 77.000000 127.240444 35.849000 75.000000 
 127.240444 35.849111 75.000000 127.240444 35.849111 75.000000 
 127.240444 35.849222 75.000000 127.240444 35.849222 75.000000 
 127.240556 35.849222 77.000000 127.240556 35.849222 76.000000 
 127.240556 35.849333 78.000000 127.240556 35.849333 77.000000 
 127.240556 35.849444 79.000000 127.240556 35.849444 77.000000 
 127.240667 35.849444 81.000000 127.240667 35.849444 80.000000 
 127.240667 35.849556 82.000000 127.240667 35.849556 80.000000 
 127.240667 35.849667 82.000000 127.240667 35.849667 80.000000 
 127.240778 35.849667 85.000000 127.240778 35.849667 83.000000 
 127.240778 35.849778 88.000000 127.240778 35.849778 85.000000 
 127.240778 35.849889 91.000000 127.240778 35.849889 89.000000 
 127.240889 35.850000 100.000000 127.240889 35.850000 91.000000 
 127.240889 35.850111 98.000000 127.240889 35.850111 86.000000 
 127.240889 35.850222 89.000000 127.240889 35.850222 90.000000 
 127.241000 35.850222 91.000000 127.241000 35.850222 91.000000 
 127.241000 35.850333 93.000000 127.241000 35.850333 98.000000 
 127.241000 35.850444 99.000000 127.241000 35.850444 107.000000 
 127.241111 35.850444 100.000000 127.241111 35.850444 109.000000 
 127.241111 35.850556 111.000000 127.241111 35.850556 114.000000 
 127.241111 35.850667 117.000000 127.241111 35.850667 117.000000 
 127.241222 35.850667 119.000000 127.241222 35.850667 119.000000 
 127.241222 35.850778 120.000000 127.241222 35.850778 114.000000 
 127.241222 35.850889 115.000000 127.241222 35.850889 104.000000 
 127.241333 35.850889 116.000000 127.241333 35.850889 106.000000 
 127.241333 35.851000 108.000000 127.241333 35.851000 101.000000 
 127.241333 35.851111 103.000000 127.241333 35.851111 94.000000 
 127.241444 35.851111 104.000000 127.241444 35.851111 96.000000 
 127.241444 35.851222 97.000000 127.241444 35.851222 91.000000 
 127.241444 35.851333 93.000000 127.241444 35.851333 85.000000 
 127.241444 35.851444 86.000000 127.241444 35.851444 85.000000 
 127.241556 35.851444 87.000000 127.241556 35.851444 85.000000 
 127.241556 35.851556 85.000000 127.241556 35.851556 85.000000 
 127.241556 35.851667 87.000000 127.241556 35.851667 90.000000 
 127.241667 35.851667 88.000000 127.241667 35.851667 92.000000 
 127.241667 35.851778 93.000000 127.241667 35.851778 101.000000 
 127.241667 35.851889 103.000000 127.241667 35.851889 109.000000 
 127.241778 35.851889 104.000000 127.241778 35.851889 109.000000 
 127.241778 35.852000 108.000000 127.241778 35.852000 114.000000 
 127.241778 35.852111 114.000000 127.241778 35.852111 123.000000 
 127.241889 35.852111 114.000000 127.241889 35.852111 123.000000 
 127.241889 35.852222 125.000000 127.241889 35.852222 130.000000 
 127.241889 35.852333 130.000000 127.241889 35.852333 128.000000 
 127.242000 35.852333 132.000000 127.242000 35.852333 132.000000 
 127.242000 35.852444 137.000000 127.242000 35.852444 128.000000 
 127.242000 35.852556 135.000000 127.242000 35.852556 124.000000 
 127.242000 35.852667 129.000000 127.242000 35.852667 122.000000 
 127.242111 35.852667 136.000000 127.242111 35.852667 128.000000 
 127.242111 35.852778 132.000000 127.242111 35.852778 126.000000 
 127.242111 35.852889 130.000000 127.242111 35.852889 122.000000 
 127.242222 35.852889 133.000000 127.242222 35.852889 127.000000 
 127.242222 35.853000 131.000000 127.242222 35.853000 124.000000 
 127.242222 35.853111 126.000000 127.242222 35.853111 130.000000 
 127.242333 35.853111 131.000000 127.242333 35.853111 133.000000 
 127.242333 35.853222 135.000000 127.242333 35.853222 143.000000 
 127.242333 35.853333 146.000000 127.242333 35.853333 150.000000 
 127.242444 35.853333 148.000000 127.242444 35.853333 152.000000 
 127.242444 35.853444 154.000000 127.242444 35.853444 158.000000 
 127.242444 35.853556 161.000000 127.242444 35.853556 159.000000 
 127.242556 35.853556 164.000000 127.242556 35.853556 163.000000 
 127.242556 35.853667 167.000000 127.242556 35.853667 160.000000 
 127.242556 35.853778 162.000000 127.242556 35.853778 153.000000 
 127.242556 35.853889 158.000000 127.242556 35.853889 149.000000 
 127.242667 35.853889 162.000000 127.242667 35.853889 154.000000 
 127.242667 35.854000 159.000000 127.242667 35.854000 155.000000 
 127.242667 35.854111 158.000000 127.242667 35.854111 158.000000 
 127.242778 35.854111 161.000000 127.242778 35.854111 161.000000 
 127.242778 35.854222 164.000000 127.242778 35.854222 165.000000 
 127.242778 35.854333 168.000000 127.242778 35.854333 168.000000 
 127.242889 35.854333 170.000000 127.242889 35.854333 170.000000 
 127.242889 35.854444 170.000000 127.242889 35.854444 170.000000 
 127.242889 35.854556 169.000000 127.242889 35.854556 167.000000 
 127.243000 35.854556 168.000000 127.243000 35.854556 165.000000 
 127.243000 35.854667 164.000000 127.243000 35.854667 160.000000 
 127.243000 35.854778 159.000000 127.243000 35.854778 155.000000 
 127.243111 35.854778 158.000000 127.243111 35.854778 154.000000 
 127.243111 35.854889 153.000000 127.243111 35.854889 144.000000 
 127.243111 35.855000 144.000000 127.243111 35.855000 138.000000 
 127.243111 35.855111 138.000000 127.243111 35.855111 129.000000 
 127.243222 35.855111 138.000000 127.243222 35.855111 129.000000 
 127.243222 35.855222 129.000000 127.243222 35.855222 122.000000 
 127.243222 35.855333 123.000000 127.243222 35.855333 116.000000 
 127.243333 35.855333 124.000000 127.243333 35.855333 112.000000 
 127.243333 35.855444 113.000000 127.243333 35.855444 107.000000 
 127.243333 35.855556 106.000000 127.243333 35.855556 104.000000 
 127.243444 35.855556 105.000000 127.243444 35.855556 100.000000 
 127.243444 35.855667 97.000000 127.243444 35.855667 94.000000 
 127.243444 35.855778 90.000000 127.243444 35.855778 90.000000 
 127.243556 35.855778 87.000000 127.243556 35.855778 85.000000 
 127.243556 35.855889 83.000000 127.243556 35.855889 80.000000 
 127.243556 35.856000 79.000000 127.243556 35.856000 78.000000 
 127.243667 35.856000 77.000000 127.243667 35.856000 76.000000 
 127.243667 35.856111 75.000000 127.243667 35.856111 70.000000 
 127.243667 35.856222 71.000000 127.243667 35.856222 70.000000 
 127.243778 35.856333 78.000000 127.243778 35.856333 71.000000 
 127.243778 35.856444 73.000000 127.243778 35.856444 70.000000 
 127.243778 35.856556 71.000000 127.243778 35.856556 69.000000 
 127.243889 35.856556 73.000000 127.243889 35.856556 69.000000 
 127.243889 35.856667 70.000000 127.243889 35.856667 68.000000 
 127.243889 35.856778 69.000000 127.243889 35.856778 67.000000 
 127.244000 35.856778 69.000000 127.244000 35.856778 67.000000 
 127.244000 35.856889 68.000000 127.244000 35.856889 67.000000 
 127.244000 35.857000 67.000000 127.244000 35.857000 66.000000 
 127.244111 35.857000 68.000000 127.244111 35.857000 66.000000 
 127.244111 35.857111 67.000000 127.244111 35.857111 66.000000 
 127.244111 35.857222 66.000000 127.244111 35.857222 65.000000 
 127.244222 35.857222 66.000000 127.244222 35.857222 65.000000 
 127.244222 35.857333 66.000000 127.244222 35.857333 65.000000 
 127.244222 35.857444 65.000000 127.244222 35.857444 65.000000 
 127.244333 35.857444 66.000000 127.244333 35.857444 65.000000 
 127.244333 35.857556 65.000000 127.244333 35.857556 64.000000 
 127.244333 35.857667 65.000000 127.244333 35.857667 64.000000 
 127.244333 35.857778 65.000000 127.244333 35.857778 65.000000 
 127.244444 35.857778 65.000000 127.244444 35.857778 65.000000 
 127.244444 35.857889 65.000000 127.244444 35.857889 65.000000 
 127.244444 35.858000 65.000000 127.244444 35.858000 65.000000 
 127.244556 35.858000 65.000000 127.244556 35.858000 65.000000 
 127.244556 35.858111 65.000000 127.244556 35.858111 65.000000 
 127.244556 35.858222 65.000000 127.244556 35.858222 65.000000 
 127.244667 35.858222 65.000000 127.244667 35.858222 65.000000 
 127.244667 35.858333 65.000000 127.244667 35.858333 65.000000 
 127.244667 35.858444 65.000000 127.244667 35.858444 64.000000 
 127.244778 35.858444 65.000000 127.244778 35.858444 65.000000 
 127.244778 35.858556 65.000000 127.244778 35.858556 65.000000 
 127.244778 35.858667 65.000000 127.244778 35.858667 65.000000 
 127.244889 35.858667 65.000000 127.244889 35.858667 65.000000 
 127.244889 35.858778 65.000000 127.244889 35.858778 65.000000 
 127.244889 35.858889 65.000000 127.244889 35.858889 65.000000 
 127.244889 35.859000 65.000000 127.244889 35.859000 65.000000 
 127.245000 35.859000 65.000000 127.245000 35.859000 65.000000 
 127.245000 35.859111 65.000000 127.245000 35.859111 65.000000 
 127.245000 35.859222 65.000000 127.245000 35.859222 65.000000 
 127.245111 35.859222 65.000000 127.245111 35.859222 65.000000 
 127.245111 35.859333 65.000000 127.245111 35.859333 65.000000 
 127.245111 35.859444 65.000000 127.245111 35.859444 65.000000 
 127.245222 35.859444 65.000000 127.245222 35.859444 65.000000 
 127.245222 35.859556 65.000000 127.245222 35.859556 65.000000 
 127.245222 35.859667 65.000000 127.245222 35.859667 65.000000 
 127.245333 35.859667 65.000000 127.245333 35.859667 65.000000 
 127.245333 35.859778 65.000000 127.245333 35.859778 65.000000 
 127.245333 35.859889 65.000000 127.245333 35.859889 65.000000 
 127.245444 35.859889 65.000000 127.245444 35.859889 65.000000 
 127.245444 35.860000 65.000000 127.245444 35.860000 65.000000 
 127.245444 35.860111 65.000000 127.245444 35.860111 65.000000 
 127.245444 35.860222 65.000000 127.245444 35.860222 65.000000 
 127.245556 35.860222 65.000000 127.245556 35.860222 65.000000 
 127.245556 35.860333 65.000000 127.245556 35.860333 65.000000 
 127.245556 35.860444 65.000000 127.245556 35.860444 65.000000 
 127.245667 35.860444 65.000000 127.245667 35.860444 65.000000 
 127.245667 35.860556 65.000000 127.245667 35.860556 64.000000 
 127.245667 35.860667 64.000000 127.245667 35.860667 64.000000 
 127.245778 35.860667 64.000000 127.245778 35.860667 64.000000 
 127.245778 35.860778 64.000000 127.245778 35.860778 64.000000 
 127.245778 35.860889 64.000000 127.245778 35.860889 64.000000 
 127.245889 35.860889 64.000000 127.245889 35.860889 64.000000 
 127.245889 35.861000 64.000000 127.245889 35.861000 64.000000 
 127.245889 35.861111 64.000000 127.245889 35.861111 64.000000 
 127.246000 35.861111 64.000000 127.246000 35.861111 64.000000 
 127.246000 35.861222 64.000000 127.246000 35.861222 64.000000 
 127.246000 35.861333 65.000000 127.246000 35.861333 64.000000 
 127.246000 35.861444 65.000000 127.246000 35.861444 64.000000 
 127.246111 35.861444 65.000000 127.246111 35.861444 65.000000 
 127.246111 35.861556 65.000000 127.246111 35.861556 65.000000 
 127.246111 35.861667 65.000000 127.246111 35.861667 65.000000 
 127.246222 35.861667 65.000000 127.246222 35.861667 65.000000 
 127.246222 35.861778 65.000000 127.246222 35.861778 65.000000 
 127.246222 35.861889 65.000000 127.246222 35.861889 65.000000 
 127.246333 35.861889 65.000000 127.246333 35.861889 65.000000 
 127.246333 35.862000 65.000000 127.246333 35.862000 65.000000 
 127.246333 35.862111 65.000000 127.246333 35.862111 65.000000 
 127.246444 35.862111 65.000000 127.246444 35.862111 65.000000 
 127.246444 35.862222 65.000000 127.246444 35.862222 65.000000 
 127.246444 35.862333 65.000000 127.246444 35.862333 65.000000 
 127.246556 35.862333 65.000000 127.246556 35.862333 65.000000 
 127.246556 35.862444 65.000000 127.246556 35.862444 65.000000 
 127.246556 35.862556 65.000000 127.246556 35.862556 67.000000 
 127.246667 35.862667 68.000000 127.246667 35.862667 68.000000 
 127.246667 35.862778 68.000000 127.246667 35.862778 73.000000 
 127.246667 35.862889 73.000000 127.246667 35.862889 76.000000 
 127.246778 35.862889 72.000000 127.246778 35.862889 75.000000 
 127.246778 35.863000 73.000000 127.246778 35.863000 74.000000 
 127.246778 35.863111 71.000000 127.246778 35.863111 67.000000 
 127.246889 35.863111 68.000000 127.246889 35.863111 67.000000 
 127.246889 35.863222 68.000000 127.246889 35.863222 67.000000 
 127.246889 35.863333 67.000000 127.246889 35.863333 66.000000 
 127.247000 35.863333 67.000000 127.247000 35.863333 66.000000 
 127.247000 35.863444 67.000000 127.247000 35.863444 66.000000 
 127.247000 35.863556 66.000000 127.247000 35.863556 65.000000 
 127.247111 35.863556 66.000000 127.247111 35.863556 65.000000 
 127.247111 35.863667 66.000000 127.247111 35.863667 65.000000 
 127.247111 35.863778 66.000000 127.247111 35.863778 65.000000 
 127.247222 35.863778 67.000000 127.247222 35.863778 66.000000 
 127.247222 35.863889 67.000000 127.247222 35.863889 66.000000 
 127.247222 35.864000 67.000000 127.247222 35.864000 65.000000 
 127.247222 35.864111 67.000000 127.247222 35.864111 65.000000 
 127.247333 35.864111 68.000000 127.247333 35.864111 66.000000 
 127.247333 35.864222 67.000000 127.247333 35.864222 65.000000 
 127.247333 35.864333 65.000000 127.247333 35.864333 65.000000 
 127.247444 35.864333 67.000000 127.247444 35.864333 65.000000 
 127.247444 35.864444 66.000000 127.247444 35.864444 65.000000 
 127.247444 35.864556 65.000000 127.247444 35.864556 66.000000 
 127.247556 35.864556 65.000000 127.247556 35.864556 65.000000 
 127.247556 35.864667 65.000000 127.247556 35.864667 67.000000 
 127.247556 35.864778 65.000000 127.247556 35.864778 68.000000 
 127.247667 35.864778 65.000000 127.247667 35.864778 67.000000 
 127.247667 35.864889 68.000000 127.247667 35.864889 70.000000 
 127.247667 35.865000 70.000000 127.247667 35.865000 70.000000 
 127.247778 35.865000 70.000000 127.247778 35.865000 70.000000 
 127.247778 35.865111 70.000000 127.247778 35.865111 70.000000 
 127.247778 35.865222 70.000000 127.247778 35.865222 70.000000 
 127.247778 35.865333 70.000000 127.247778 35.865333 70.000000 
 127.247889 35.865333 70.000000 127.247889 35.865333 70.000000 
 127.247889 35.865444 70.000000 127.247889 35.865444 70.000000 
 127.247889 35.865556 70.000000 127.247889 35.865556 70.000000 
 127.248000 35.865556 70.000000 127.248000 35.865556 70.000000 
 127.248000 35.865667 69.000000 127.248000 35.865667 70.000000 
 127.248000 35.865778 70.000000 127.248000 35.865778 70.000000 
 127.248111 35.865778 69.000000 127.248111 35.865778 70.000000 
 127.248111 35.865889 70.000000 127.248111 35.865889 70.000000 
 127.248111 35.866000 70.000000 127.248111 35.866000 70.000000 
 127.248222 35.866000 69.000000 127.248222 35.866000 70.000000 
 127.248222 35.866111 70.000000 127.248222 35.866111 70.000000 
 127.248222 35.866222 70.000000 127.248222 35.866222 70.000000 
 127.248333 35.866222 70.000000 127.248333 35.866222 70.000000 
 127.248333 35.866333 70.000000 127.248333 35.866333 70.000000 
 127.248333 35.866444 70.000000 127.248333 35.866444 71.000000 
 127.248333 35.866556 71.000000 127.248333 35.866556 71.000000 
 127.248444 35.866556 71.000000 127.248444 35.866556 71.000000 
 127.248444 35.866667 71.000000 127.248444 35.866667 71.000000 
 127.248444 35.866778 71.000000 127.248444 35.866778 71.000000 
 127.248556 35.866778 70.000000 127.248556 35.866778 71.000000 
 127.248556 35.866889 70.000000 127.248556 35.866889 70.000000 
 127.248556 35.867000 70.000000 127.248556 35.867000 70.000000 
 127.248667 35.867000 70.000000 127.248667 35.867000 70.000000 
 127.248667 35.867111 70.000000 127.248667 35.867111 70.000000 
 127.248667 35.867222 70.000000 127.248667 35.867222 70.000000 
 127.248778 35.867222 70.000000 127.248778 35.867222 70.000000 
 127.248778 35.867333 70.000000 127.248778 35.867333 70.000000 
 127.248778 35.867444 70.000000 127.248778 35.867444 71.000000 
 127.248889 35.867444 70.000000 127.248889 35.867444 70.000000 
 127.248889 35.867556 70.000000 127.248889 35.867556 71.000000 
 127.248889 35.867667 70.000000 127.248889 35.867667 71.000000 
 127.249000 35.867667 70.000000 127.249000 35.867667 71.000000 
 127.249000 35.867778 71.000000 127.249000 35.867778 71.000000 
 127.249000 35.867889 71.000000 127.249000 35.867889 71.000000 
 127.249000 35.868000 71.000000 127.249000 35.868000 72.000000 
 127.249111 35.868000 71.000000 127.249111 35.868000 72.000000 
 127.249111 35.868111 72.000000 127.249111 35.868111 72.000000 
 127.249111 35.868222 72.000000 127.249111 35.868222 73.000000 
 127.249222 35.868222 72.000000 127.249222 35.868222 73.000000 
 127.249222 35.868333 72.000000 127.249222 35.868333 73.000000 
 127.249222 35.868444 72.000000 127.249222 35.868444 74.000000 
 127.249333 35.868444 72.000000 127.249333 35.868444 73.000000 
 127.249333 35.868556 73.000000 127.249333 35.868556 74.000000 
 127.249333 35.868667 73.000000 127.249333 35.868667 74.000000 
 127.249444 35.868667 73.000000 127.249444 35.868667 74.000000 
 127.249444 35.868778 74.000000 127.249444 35.868778 74.000000 
 127.249444 35.868889 74.000000 127.249444 35.868889 74.000000 
 127.249556 35.868889 74.000000 127.249556 35.868889 74.000000 
 127.249556 35.869000 74.000000 127.249556 35.869000 74.000000 
 127.249556 35.869111 74.000000 127.249556 35.869111 74.000000 
 127.249556 35.869222 74.000000 127.249556 35.869222 74.000000 
 127.249667 35.869222 74.000000 127.249667 35.869222 74.000000 
 127.249667 35.869333 75.000000 127.249667 35.869333 74.000000 
 127.249667 35.869444 75.000000 127.249667 35.869444 75.000000 
 127.249778 35.869444 75.000000 127.249778 35.869444 75.000000 
 127.249778 35.869556 75.000000 127.249778 35.869556 75.000000 
 127.249778 35.869667 75.000000 127.249778 35.869667 75.000000 
 127.249889 35.869667 75.000000 127.249889 35.869667 75.000000 
 127.249889 35.869778 76.000000 127.249889 35.869778 75.000000 
 127.249889 35.869889 76.000000 127.249889 35.869889 76.000000 
 127.250000 35.869889 76.000000 127.250000 35.869889 76.000000 
 127.250000 35.870000 76.000000 127.250000 35.870000 76.000000 
 127.250000 35.870111 76.000000 127.250000 35.870111 76.000000 
 127.250111 35.870111 77.000000 127.250111 35.870111 76.000000 
 127.250111 35.870222 76.000000 127.250111 35.870222 76.000000 
 127.250111 35.870333 76.000000 127.250111 35.870333 76.000000 
 127.250111 35.870444 76.000000 127.250111 35.870444 76.000000 
 127.250222 35.870444 76.000000 127.250222 35.870444 76.000000 
 127.250222 35.870556 76.000000 127.250222 35.870556 76.000000 
 127.250222 35.870667 76.000000 127.250222 35.870667 76.000000 
 127.250333 35.870667 76.000000 127.250333 35.870667 76.000000 
 127.250333 35.870778 76.000000 127.250333 35.870778 76.000000 
 127.250333 35.870889 76.000000 127.250333 35.870889 76.000000 
 127.250444 35.870889 76.000000 127.250444 35.870889 76.000000 
 127.250444 35.871000 77.000000 127.250444 35.871000 77.000000 
 127.250444 35.871111 77.000000 127.250444 35.871111 77.000000 
 127.250556 35.871111 77.000000 127.250556 35.871111 77.000000 
 127.250556 35.871222 77.000000 127.250556 35.871222 77.000000 
 127.250556 35.871333 77.000000 127.250556 35.871333 77.000000 
 127.250667 35.871333 77.000000 127.250667 35.871333 77.000000 
 127.250667 35.871444 78.000000 127.250667 35.871444 78.000000 
 127.250667 35.871556 78.000000 127.250667 35.871556 78.000000 
 127.250778 35.871667 78.000000 127.250778 35.871667 79.000000 
 127.250778 35.871778 79.000000 127.250778 35.871778 79.000000 
 127.250778 35.871889 79.000000 127.250778 35.871889 79.000000 
 127.250889 35.871889 79.000000 127.250889 35.871889 79.000000 
 127.250889 35.872000 80.000000 127.250889 35.872000 81.000000 
 127.250889 35.872111 83.000000 127.250889 35.872111 83.000000 
 127.251000 35.872111 84.000000 127.251000 35.872111 84.000000 
 127.251000 35.872222 86.000000 127.251000 35.872222 87.000000 
 127.251000 35.872333 89.000000 127.251000 35.872333 88.000000 
 127.251111 35.872333 92.000000 127.251111 35.872333 91.000000 
 127.251111 35.872444 94.000000 127.251111 35.872444 95.000000 
 127.251111 35.872556 99.000000 127.251111 35.872556 98.000000 
 127.251222 35.872556 104.000000 127.251222 35.872556 103.000000 
 127.251222 35.872667 107.000000 127.251222 35.872667 108.000000 
 127.251222 35.872778 112.000000 127.251222 35.872778 112.000000 
 127.251333 35.872778 116.000000 127.251333 35.872778 115.000000 
 127.251333 35.872889 120.000000 127.251333 35.872889 118.000000 
 127.251333 35.873000 122.000000 127.251333 35.873000 119.000000 
 127.251333 35.873111 124.000000 127.251333 35.873111 118.000000 
 127.251444 35.873111 128.000000 127.251444 35.873111 123.000000 
 127.251444 35.873222 127.000000 127.251444 35.873222 119.000000 
 127.251444 35.873333 123.000000 127.251444 35.873333 117.000000 
 127.251556 35.873333 129.000000 127.251556 35.873333 122.000000 
 127.251556 35.873444 128.000000 127.251556 35.873444 121.000000 
 127.251556 35.873556 128.000000 127.251556 35.873556 120.000000 
 127.251667 35.873556 132.000000 127.251667 35.873556 127.000000 
 127.251667 35.873667 131.000000 127.251667 35.873667 127.000000 
 127.251667 35.873778 130.000000 127.251667 35.873778 128.000000 
 127.251778 35.873778 130.000000 127.251778 35.873778 131.000000 
 127.251778 35.873889 130.000000 127.251778 35.873889 135.000000 
 127.251778 35.874000 134.000000 127.251778 35.874000 135.000000 
 127.251889 35.874000 129.000000 127.251889 35.874000 135.000000 
 127.251889 35.874111 130.000000 127.251889 35.874111 133.000000 
 127.251889 35.874222 130.000000 127.251889 35.874222 129.000000 
 127.251889 35.874333 127.000000 127.251889 35.874333 125.000000 
 127.252000 35.874333 125.000000 127.252000 35.874333 122.000000 
 127.252000 35.874444 118.000000 127.252000 35.874444 119.000000 
 127.252000 35.874556 117.000000 127.252000 35.874556 121.000000 
 127.252111 35.874556 115.000000 127.252111 35.874556 119.000000 
 127.252111 35.874667 117.000000 127.252111 35.874667 123.000000 
 127.252111 35.874778 120.000000 127.252111 35.874778 125.000000 
 127.252222 35.874778 116.000000 127.252222 35.874778 121.000000 
 127.252222 35.874889 115.000000 127.252222 35.874889 118.000000 
 127.252222 35.875000 112.000000 127.252222 35.875000 116.000000 
 127.252333 35.875000 108.000000 127.252333 35.875000 111.000000 
 127.252333 35.875111 110.000000 127.252333 35.875111 111.000000 
 127.252333 35.875222 110.000000 127.252333 35.875222 113.000000 
 127.252444 35.875222 111.000000 127.252444 35.875222 113.000000 
 127.252444 35.875333 114.000000 127.252444 35.875333 117.000000 
 127.252444 35.875444 118.000000 127.252444 35.875444 119.000000 
 127.252444 35.875556 122.000000 127.252444 35.875556 125.000000 
 127.252556 35.875556 124.000000 127.252556 35.875556 128.000000 
 127.252556 35.875667 131.000000 127.252556 35.875667 131.000000 
 127.252556 35.875778 134.000000 127.252556 35.875778 134.000000 
 127.252667 35.875778 136.000000 127.252667 35.875778 137.000000 
 127.252667 35.875889 140.000000 127.252667 35.875889 139.000000 
 127.252667 35.876000 144.000000 127.252667 35.876000 144.000000 
 127.252778 35.876000 146.000000 127.252778 35.876000 149.000000 
 127.252778 35.876111 152.000000 127.252778 35.876111 151.000000 
 127.252778 35.876222 154.000000 127.252778 35.876222 156.000000 
 127.252889 35.876222 155.000000 127.252889 35.876222 157.000000 
 127.252889 35.876333 159.000000 127.252889 35.876333 161.000000 
 127.252889 35.876444 162.000000 127.252889 35.876444 163.000000 
 127.253000 35.876444 161.000000 127.253000 35.876444 165.000000 
 127.253000 35.876556 162.000000 127.253000 35.876556 168.000000 
 127.253000 35.876667 165.000000 127.253000 35.876667 170.000000 
 127.253111 35.876778 160.000000 127.253111 35.876778 163.000000 
 127.253111 35.876889 159.000000 127.253111 35.876889 162.000000 
 127.253111 35.877000 158.000000 127.253111 35.877000 160.000000 
 127.253222 35.877000 154.000000 127.253222 35.877000 156.000000 
 127.253222 35.877111 151.000000 127.253222 35.877111 155.000000 
 127.253222 35.877222 149.000000 127.253222 35.877222 152.000000 
 127.253333 35.877222 143.000000 127.253333 35.877222 145.000000 
 127.253333 35.877333 137.000000 127.253333 35.877333 141.000000 
 127.253333 35.877444 134.000000 127.253333 35.877444 137.000000 
 127.253444 35.877444 129.000000 127.253444 35.877444 132.000000 
 127.253444 35.877556 125.000000 127.253444 35.877556 130.000000 
 127.253444 35.877667 125.000000 127.253444 35.877667 129.000000 
 127.253556 35.877667 122.000000 127.253556 35.877667 126.000000 
 127.253556 35.877778 124.000000 127.253556 35.877778 129.000000 
 127.253556 35.877889 130.000000 127.253556 35.877889 134.000000 
 127.253667 35.877889 130.000000 127.253667 35.877889 136.000000 
 127.253667 35.878000 135.000000 127.253667 35.878000 141.000000 
 127.253667 35.878111 139.000000 127.253667 35.878111 145.000000 
 127.253667 35.878222 142.000000 127.253667 35.878222 151.000000 
 127.253778 35.878222 137.000000 127.253778 35.878222 146.000000 
 127.253778 35.878333 140.000000 127.253778 35.878333 149.000000 
 127.253778 35.878444 142.000000 127.253778 35.878444 150.000000 
 127.253889 35.878444 137.000000 127.253889 35.878444 145.000000 
 127.253889 35.878556 141.000000 127.253889 35.878556 143.000000 
 127.253889 35.878667 141.000000 127.253889 35.878667 137.000000 
 127.254000 35.878667 140.000000 127.254000 35.878667 137.000000 
 127.254000 35.878778 138.000000 127.254000 35.878778 132.000000 
 127.254000 35.878889 134.000000 127.254000 35.878889 126.000000 
 127.254111 35.878889 134.000000 127.254111 35.878889 128.000000 
 127.254111 35.879000 129.000000 127.254111 35.879000 124.000000 
 127.254111 35.879111 125.000000 127.254111 35.879111 115.000000 
 127.254222 35.879111 125.000000 127.254222 35.879111 117.000000 
 127.254222 35.879222 117.000000 127.254222 35.879222 110.000000 
 127.254222 35.879333 110.000000 127.254222 35.879333 110.000000 
 127.254222 35.879444 106.000000 127.254222 35.879444 109.000000 
 127.254333 35.879444 105.000000 127.254333 35.879444 106.000000 
 127.254333 35.879556 103.000000 127.254333 35.879556 105.000000 
 127.254333 35.879667 103.000000 127.254333 35.879667 106.000000 
 127.254444 35.879667 101.000000 127.254444 35.879667 103.000000 
 127.254444 35.879778 101.000000 127.254444 35.879778 104.000000 
 127.254444 35.879889 102.000000 127.254444 35.879889 103.000000 
 127.254556 35.879889 100.000000 127.254556 35.879889 102.000000 
 127.254556 35.880000 100.000000 127.254556 35.880000 101.000000 
 127.254556 35.880111 100.000000 127.254556 35.880111 103.000000 
 127.254667 35.880111 98.000000 127.254667 35.880111 102.000000 
 127.254667 35.880222 101.000000 127.254667 35.880222 104.000000 
 127.254667 35.880333 103.000000 127.254667 35.880333 109.000000 
 127.254778 35.880333 101.000000 127.254778 35.880333 108.000000 
 127.254778 35.880444 105.000000 127.254778 35.880444 112.000000 
 127.254778 35.880556 109.000000 127.254778 35.880556 114.000000 
 127.254778 35.880667 110.000000 127.254778 35.880667 114.000000 
 127.254889 35.880667 106.000000 127.254889 35.880667 110.000000 
 127.254889 35.880778 107.000000 127.254889 35.880778 111.000000 
 127.254889 35.880889 108.000000 127.254889 35.880889 113.000000 
 127.255000 35.880889 107.000000 127.255000 35.880889 112.000000 
 127.255000 35.881000 110.000000 127.255000 35.881000 118.000000 
 127.255000 35.881111 116.000000 127.255000 35.881111 124.000000 
 127.255111 35.881111 112.000000 127.255111 35.881111 121.000000 
 127.255111 35.881222 116.000000 127.255111 35.881222 126.000000 
 127.255111 35.881333 119.000000 127.255111 35.881333 129.000000 
 127.255222 35.881333 114.000000 127.255222 35.881333 122.000000 
 127.255222 35.881444 116.000000 127.255222 35.881444 125.000000 
 127.255222 35.881556 119.000000 127.255222 35.881556 127.000000 
 127.255333 35.881556 113.000000 127.255333 35.881556 121.000000 
 127.255333 35.881667 115.000000 127.255333 35.881667 123.000000 
 127.255333 35.881778 116.000000 127.255333 35.881778 123.000000 
 127.255333 35.881889 117.000000 127.255333 35.881889 121.000000 
 127.255444 35.881889 112.000000 127.255444 35.881889 116.000000 
 127.255444 35.882000 112.000000 127.255444 35.882000 117.000000 
 127.255444 35.882111 114.000000 127.255444 35.882111 121.000000 
 127.255556 35.882111 111.000000 127.255556 35.882111 119.000000 
 127.255556 35.882222 115.000000 127.255556 35.882222 127.000000 
 127.255556 35.882333 124.000000 127.255556 35.882333 129.000000 
 127.255667 35.882333 118.000000 127.255667 35.882333 126.000000 
 127.255667 35.882444 121.000000 127.255667 35.882444 126.000000 
 127.255667 35.882556 123.000000 127.255667 35.882556 125.000000 
 127.255778 35.882556 119.000000 127.255778 35.882556 122.000000 
 127.255778 35.882667 119.000000 127.255778 35.882667 118.000000 
 127.255778 35.882778 117.000000 127.255778 35.882778 118.000000 
 127.255889 35.882778 115.000000 127.255889 35.882778 116.000000 
 127.255889 35.882889 114.000000 127.255889 35.882889 118.000000 
 127.255889 35.883000 117.000000 127.255889 35.883000 121.000000 
 127.255889 35.883111 121.000000 127.255889 35.883111 128.000000 
 127.256000 35.883111 120.000000 127.256000 35.883111 126.000000 
 127.256000 35.883222 125.000000 127.256000 35.883222 125.000000 
 127.256000 35.883333 125.000000 127.256000 35.883333 123.000000 
 127.256111 35.883333 125.000000 127.256111 35.883333 124.000000 
 127.256111 35.883444 123.000000 127.256111 35.883444 112.000000 
 127.256111 35.883556 110.000000 127.256111 35.883556 110.000000 
 127.256222 35.883556 110.000000 127.256222 35.883556 110.000000 
 127.256222 35.883667 110.000000 127.256222 35.883667 110.000000 
 127.256222 35.883778 110.000000 127.256222 35.883778 110.000000 
 127.256333 35.883778 110.000000 127.256333 35.883778 110.000000 
 127.256333 35.883889 110.000000 127.256333 35.883889 111.000000 
 127.256333 35.884000 110.000000 127.256333 35.884000 112.000000 
 127.256444 35.884000 109.000000 127.256444 35.884000 111.000000 
 127.256444 35.884111 110.000000 127.256444 35.884111 113.000000 
 127.256444 35.884222 111.000000 127.256444 35.884222 114.000000 
 127.256444 35.884333 113.000000 127.256444 35.884333 118.000000 
 127.256556 35.884333 111.000000 127.256556 35.884333 115.000000 
 127.256556 35.884444 113.000000 127.256556 35.884444 117.000000 
 127.256556 35.884556 114.000000 127.256556 35.884556 118.000000 
 127.256667 35.884556 112.000000 127.256667 35.884556 114.000000 
 127.256667 35.884667 113.000000 127.256667 35.884667 116.000000 
 127.256667 35.884778 113.000000 127.256667 35.884778 117.000000 
 127.256778 35.884778 112.000000 127.256778 35.884778 114.000000 
 127.256778 35.884889 113.000000 127.256778 35.884889 115.000000 
 127.256778 35.885000 114.000000 127.256778 35.885000 116.000000 
 127.256889 35.885000 113.000000 127.256889 35.885000 115.000000 
 127.256889 35.885111 114.000000 127.256889 35.885111 116.000000 
 127.256889 35.885222 114.000000 127.256889 35.885222 117.000000 
 127.257000 35.885222 114.000000 127.257000 35.885222 115.000000 
 127.257000 35.885333 114.000000 127.257000 35.885333 116.000000 
 127.257000 35.885444 115.000000 127.257000 35.885444 118.000000 
 127.257000 35.885556 116.000000 127.257000 35.885556 119.000000 
 127.257111 35.885556 114.000000 127.257111 35.885556 117.000000 
 127.257111 35.885667 115.000000 127.257111 35.885667 117.000000 
 127.257111 35.885778 115.000000 127.257111 35.885778 117.000000 
 127.257222 35.885778 115.000000 127.257222 35.885778 116.000000 
 127.257222 35.885889 115.000000 127.257222 35.885889 116.000000 
 127.257222 35.886000 116.000000 127.257222 35.886000 117.000000 
 127.257333 35.886000 115.000000 127.257333 35.886000 117.000000 
 127.257333 35.886111 116.000000 127.257333 35.886111 117.000000 
 127.257333 35.886222 116.000000 127.257333 35.886222 117.000000 
 127.257444 35.886222 116.000000 127.257444 35.886222 117.000000 
 127.257444 35.886333 116.000000 127.257444 35.886333 117.000000 
 127.257444 35.886444 116.000000 127.257444 35.886444 117.000000 
 127.257556 35.886444 116.000000 127.257556 35.886444 117.000000 
 127.257556 35.886556 116.000000 127.257556 35.886556 117.000000 
 127.257556 35.886667 117.000000 127.257556 35.886667 117.000000 
 127.257556 35.886778 117.000000 127.257556 35.886778 117.000000 
 127.257667 35.886778 116.000000 127.257667 35.886778 117.000000 
 127.257667 35.886889 116.000000 127.257667 35.886889 117.000000 
 127.257667 35.887000 117.000000 127.257667 35.887000 118.000000 
 127.257778 35.887000 116.000000 127.257778 35.887000 117.000000 
 127.257778 35.887111 116.000000 127.257778 35.887111 117.000000 
 127.257778 35.887222 116.000000 127.257778 35.887222 117.000000 
 127.257889 35.887222 115.000000 127.257889 35.887222 116.000000 
 127.257889 35.887333 115.000000 127.257889 35.887333 116.000000 
 127.257889 35.887444 115.000000 127.257889 35.887444 116.000000 
 127.258000 35.887444 115.000000 127.258000 35.887444 116.000000 
 127.258000 35.887556 115.000000 127.258000 35.887556 116.000000 
 127.258000 35.887667 116.000000 127.258000 35.887667 118.000000 
 127.258111 35.887667 116.000000 127.258111 35.887667 118.000000 
 127.258111 35.887778 118.000000 127.258111 35.887778 119.000000 
 127.258111 35.887889 119.000000 127.258111 35.887889 120.000000 
 127.258222 35.887889 119.000000 127.258222 35.887889 120.000000 
 127.258222 35.888000 120.000000 127.258222 35.888000 120.000000 
 127.258222 35.888111 120.000000 127.258222 35.888111 120.000000 
 127.258222 35.888222 121.000000 127.258222 35.888222 120.000000 
 127.258333 35.888222 122.000000 127.258333 35.888222 121.000000 
 127.258333 35.888333 122.000000 127.258333 35.888333 122.000000 
 127.258333 35.888444 123.000000 127.258333 35.888444 122.000000 
 127.258444 35.888444 124.000000 127.258444 35.888444 123.000000 
 127.258444 35.888556 124.000000 127.258444 35.888556 123.000000 
 127.258444 35.888667 124.000000 127.258444 35.888667 124.000000 
 127.258556 35.888667 128.000000 127.258556 35.888667 124.000000 
 127.258556 35.888778 127.000000 127.258556 35.888778 125.000000 
 127.258556 35.888889 125.000000 127.258556 35.888889 125.000000 
 127.258667 35.888889 131.000000 127.258667 35.888889 125.000000 
 127.258667 35.889000 128.000000 127.258667 35.889000 125.000000 
 127.258667 35.889111 126.000000 127.258667 35.889111 125.000000 
 127.258778 35.889111 130.000000 127.258778 35.889111 126.000000 
 127.258778 35.889222 128.000000 127.258778 35.889222 127.000000 
 127.258778 35.889333 128.000000 127.258778 35.889333 126.000000 
 127.258778 35.889444 127.000000 127.258778 35.889444 126.000000 
 127.258889 35.889444 128.000000 127.258889 35.889444 127.000000 
 127.258889 35.889556 128.000000 127.258889 35.889556 127.000000 
 127.258889 35.889667 128.000000 127.258889 35.889667 128.000000 
 127.259000 35.889667 129.000000 127.259000 35.889667 129.000000 
 127.259000 35.889778 130.000000 127.259000 35.889778 130.000000 
 127.259000 35.889889 130.000000 127.259000 35.889889 131.000000 
 127.259111 35.889889 130.000000 127.259111 35.889889 131.000000 
 127.259111 35.890000 130.000000 127.259111 35.890000 132.000000 
 127.259111 35.890111 131.000000 127.259111 35.890111 133.000000 
 127.259222 35.890111 131.000000 127.259222 35.890111 132.000000 
 127.259222 35.890222 132.000000 127.259222 35.890222 134.000000 
 127.259222 35.890333 133.000000 127.259222 35.890333 135.000000 
 127.259333 35.890333 133.000000 127.259333 35.890333 135.000000 
 127.259333 35.890444 135.000000 127.259333 35.890444 135.000000 
 127.259333 35.890556 135.000000 127.259333 35.890556 135.000000 
 127.259333 35.890667 135.000000 127.259333 35.890667 135.000000 
 127.259444 35.890667 136.000000 127.259444 35.890667 135.000000 
 127.259444 35.890778 137.000000 127.259444 35.890778 137.000000 
 127.259444 35.890889 138.000000 127.259444 35.890889 139.000000 
 127.259556 35.890889 140.000000 127.259556 35.890889 139.000000 
 127.259556 35.891000 141.000000 127.259556 35.891000 142.000000 
 127.259556 35.891111 144.000000 127.259556 35.891111 144.000000 
 127.259667 35.891111 145.000000 127.259667 35.891111 145.000000 
 127.259667 35.891222 145.000000 127.259667 35.891222 148.000000 
 127.259667 35.891333 149.000000 127.259667 35.891333 150.000000 
 127.259778 35.891333 149.000000 127.259778 35.891333 152.000000 
 127.259778 35.891444 154.000000 127.259778 35.891444 156.000000 
 127.259778 35.891556 162.000000 127.259778 35.891556 160.000000 
 127.259889 35.891556 166.000000 127.259889 35.891556 167.000000 
 127.259889 35.891667 172.000000 127.259889 35.891667 175.000000 
 127.259889 35.891778 178.000000 127.259889 35.891778 177.000000 
 127.259889 35.891889 181.000000 127.259889 35.891889 180.000000 
 127.260000 35.891889 183.000000 127.260000 35.891889 185.000000 
 127.260000 35.892000 187.000000 127.260000 35.892000 188.000000 
 127.260000 35.892111 191.000000 127.260000 35.892111 191.000000 
 127.260111 35.892111 190.000000 127.260111 35.892111 195.000000 
 127.260111 35.892222 194.000000 127.260111 35.892222 202.000000 
 127.260111 35.892333 202.000000 127.260111 35.892333 205.000000 
 127.260222 35.892333 198.000000 127.260222 35.892333 206.000000 
 127.260222 35.892444 203.000000 127.260222 35.892444 212.000000 
 127.260222 35.892556 212.000000 127.260222 35.892556 217.000000 
 127.260333 35.892556 209.000000 127.260333 35.892556 217.000000 
 127.260333 35.892667 215.000000 127.260333 35.892667 229.000000 
 127.260333 35.892778 227.000000 127.260333 35.892778 236.000000 
 127.260444 35.892778 226.000000 127.260444 35.892778 235.000000 
 127.260444 35.892889 233.000000 127.260444 35.892889 248.000000 
 127.260444 35.893000 245.000000 127.260444 35.893000 256.000000 
 127.260444 35.893111 253.000000 127.260444 35.893111 264.000000 
 127.260556 35.893111 246.000000 127.260556 35.893111 259.000000 
 127.260556 35.893222 255.000000 127.260556 35.893222 267.000000 
 127.260556 35.893333 261.000000 127.260556 35.893333 273.000000 
 127.260667 35.893333 258.000000 127.260667 35.893333 273.000000 
 127.260667 35.893444 274.000000 127.260667 35.893444 279.000000 
 127.260667 35.893556 282.000000 127.260667 35.893556 283.000000 
 127.260778 35.893556 283.000000 127.260778 35.893556 288.000000 
 127.260778 35.893667 293.000000 127.260778 35.893667 290.000000 
 127.260778 35.893778 297.000000 127.260778 35.893778 290.000000 
 127.260889 35.893778 303.000000 127.260889 35.893778 298.000000 
 127.260889 35.893889 305.000000 127.260889 35.893889 297.000000 
 127.260889 35.894000 305.000000 127.260889 35.894000 298.000000 
 127.261000 35.894000 311.000000 127.261000 35.894000 305.000000 
 127.261000 35.894111 313.000000 127.261000 35.894111 306.000000 
 127.261000 35.894222 314.000000 127.261000 35.894222 305.000000 
 127.261000 35.894333 314.000000 127.261000 35.894333 303.000000 
 127.261111 35.894333 317.000000 127.261111 35.894333 313.000000 
 127.261111 35.894444 320.000000 127.261111 35.894444 312.000000 
 127.261111 35.894556 321.000000 127.261111 35.894556 310.000000 
 127.261222 35.894556 324.000000 127.261222 35.894556 323.000000 
 127.261222 35.894667 330.000000 127.261222 35.894667 323.000000 
 127.261222 35.894778 332.000000 127.261222 35.894778 322.000000 
 127.261333 35.894778 339.000000 127.261333 35.894778 332.000000 
 127.261333 35.894889 343.000000 127.261333 35.894889 331.000000 
 127.261333 35.895000 342.000000 127.261333 35.895000 330.000000 
 127.261444 35.895000 350.000000 127.261444 35.895000 339.000000 
 127.261444 35.895111 347.000000 127.261444 35.895111 336.000000 
 127.261444 35.895222 345.000000 127.261444 35.895222 331.000000 
 127.261556 35.895222 351.000000 127.261556 35.895222 341.000000 
 127.261556 35.895333 348.000000 127.261556 35.895333 339.000000 
 127.261556 35.895444 346.000000 127.261556 35.895444 336.000000 
 127.261556 35.895556 344.000000 127.261556 35.895556 336.000000 
 127.261667 35.895556 351.000000 127.261667 35.895556 343.000000 
 127.261667 35.895667 350.000000 127.261667 35.895667 346.000000 
 127.261667 35.895778 355.000000 127.261667 35.895778 354.000000 
 127.261778 35.895778 366.000000 127.261778 35.895778 367.000000 
 127.261778 35.895889 378.000000 127.261778 35.895889 373.000000 
 127.261778 35.896000 382.000000 127.261778 35.896000 377.000000 
 127.261889 35.896000 389.000000 127.261889 35.896000 386.000000 
 127.261889 35.896111 396.000000 127.261889 35.896111 389.000000 
 127.261889 35.896222 400.000000 127.261889 35.896222 394.000000 
 127.262000 35.896222 404.000000 127.262000 35.896222 402.000000 
 127.262000 35.896333 407.000000 127.262000 35.896333 402.000000 
 127.262000 35.896444 408.000000 127.262000 35.896444 401.000000 
 127.262111 35.896444 414.000000 127.262111 35.896444 408.000000 
 127.262111 35.896556 416.000000 127.262111 35.896556 410.000000 
 127.262111 35.896667 418.000000 127.262111 35.896667 420.000000 
 127.262222 35.896778 434.000000 127.262222 35.896778 431.000000 
 127.262222 35.896889 438.000000 127.262222 35.896889 440.000000 
 127.262222 35.897000 448.000000 127.262222 35.897000 448.000000 
 127.262333 35.897000 455.000000 127.262333 35.897000 457.000000 
 127.262333 35.897111 463.000000 127.262333 35.897111 469.000000 
 127.262333 35.897222 474.000000 127.262333 35.897222 476.000000 
 127.262444 35.897222 480.000000 127.262444 35.897222 481.000000 
 127.262444 35.897333 483.000000 127.262444 35.897333 487.000000 
 127.262444 35.897444 489.000000 127.262444 35.897444 490.000000 
 127.262556 35.897444 487.000000 127.262556 35.897444 492.000000 
 127.262556 35.897556 491.000000 127.262556 35.897556 489.000000 
 127.262556 35.897667 488.000000 127.262556 35.897667 481.000000 
 127.262667 35.897667 487.000000 127.262667 35.897667 479.000000 
 127.262667 35.897778 479.000000 127.262667 35.897778 473.000000 
 127.262667 35.897889 472.000000 127.262667 35.897889 466.000000 
 127.262778 35.897889 474.000000 127.262778 35.897889 464.000000 
 127.262778 35.898000 464.000000 127.262778 35.898000 458.000000 
 127.262778 35.898111 457.000000 127.262778 35.898111 452.000000 
 127.262778 35.898222 448.000000 127.262778 35.898222 449.000000 
 127.262889 35.898222 447.000000 127.262889 35.898222 444.000000 
 127.262889 35.898333 442.000000 127.262889 35.898333 441.000000 
 127.262889 35.898444 436.000000 127.262889 35.898444 441.000000 
 127.263000 35.898444 433.000000 127.263000 35.898444 436.000000 
 127.263000 35.898556 431.000000 127.263000 35.898556 439.000000 
 127.263000 35.898667 435.000000 127.263000 35.898667 444.000000 
 127.263111 35.898667 430.000000 127.263111 35.898667 439.000000 
 127.263111 35.898778 435.000000 127.263111 35.898778 450.000000 
 127.263111 35.898889 445.000000 127.263111 35.898889 456.000000 
 127.263222 35.898889 438.000000 127.263222 35.898889 451.000000 
 127.263222 35.899000 445.000000 127.263222 35.899000 455.000000 
 127.263222 35.899111 449.000000 127.263222 35.899111 457.000000 
 127.263333 35.899111 441.000000 127.263333 35.899111 450.000000 
 127.263333 35.899222 442.000000 127.263333 35.899222 450.000000 
 127.263333 35.899333 442.000000 127.263333 35.899333 449.000000 
 127.263333 35.899444 441.000000 127.263333 35.899444 449.000000 
 127.263444 35.899444 436.000000 127.263444 35.899444 444.000000 
 127.263444 35.899556 440.000000 127.263444 35.899556 450.000000 
 127.263444 35.899667 447.000000 127.263444 35.899667 457.000000 
 127.263556 35.899667 444.000000 127.263556 35.899667 452.000000 
 127.263556 35.899778 448.000000 127.263556 35.899778 459.000000 
 127.263556 35.899889 456.000000 127.263556 35.899889 465.000000 
 127.263667 35.899889 453.000000 127.263667 35.899889 460.000000 
 127.263667 35.900000 457.000000 127.263667 35.900000 470.000000 
 127.263667 35.900111 464.000000 127.263667 35.900111 475.000000 
 127.263778 35.900111 460.000000 127.263778 35.900111 469.000000 
 127.263778 35.900222 463.000000 127.263778 35.900222 476.000000 
 127.263778 35.900333 469.000000 127.263778 35.900333 479.000000 
 127.263889 35.900333 462.000000 127.263889 35.900333 472.000000 
 127.263889 35.900444 465.000000 127.263889 35.900444 476.000000 
 127.263889 35.900556 467.000000 127.263889 35.900556 477.000000 
 127.263889 35.900667 469.000000 127.263889 35.900667 476.000000 
 127.264000 35.900667 460.000000 127.264000 35.900667 470.000000 
 127.264000 35.900778 464.000000 127.264000 35.900778 470.000000 
 127.264000 35.900889 470.000000 127.264000 35.900889 469.000000 
 127.264111 35.900889 466.000000 127.264111 35.900889 470.000000 
 127.264111 35.901000 471.000000 127.264111 35.901000 467.000000 
 127.264111 35.901111 471.000000 127.264111 35.901111 464.000000 
 127.264222 35.901111 469.000000 127.264222 35.901111 466.000000 
 127.264222 35.901222 464.000000 127.264222 35.901222 459.000000 
 127.264222 35.901333 456.000000 127.264222 35.901333 454.000000 
 127.264333 35.901333 446.000000 127.264333 35.901333 450.000000 
 127.264333 35.901444 443.000000 127.264333 35.901444 440.000000 
 127.264333 35.901556 433.000000 127.264333 35.901556 433.000000 
 127.264444 35.901556 426.000000 127.264444 35.901556 428.000000 
 127.264444 35.901667 420.000000 127.264444 35.901667 414.000000 
 127.264444 35.901778 405.000000 127.264444 35.901778 406.000000 
 127.264444 35.901889 398.000000 127.264444 35.901889 397.000000 
 127.264556 35.901889 394.000000 127.264556 35.901889 391.000000 
 127.264556 35.902000 386.000000 127.264556 35.902000 388.000000 
 127.264556 35.902111 382.000000 127.264556 35.902111 383.000000 
 127.264667 35.902111 376.000000 127.264667 35.902111 377.000000 
 127.264667 35.902222 369.000000 127.264667 35.902222 373.000000 
 127.264667 35.902333 366.000000 127.264667 35.902333 369.000000 
 127.264778 35.902333 361.000000 127.264778 35.902333 363.000000 
 127.264778 35.902444 355.000000 127.264778 35.902444 360.000000 
 127.264778 35.902556 352.000000 127.264778 35.902556 358.000000 
 127.264889 35.902556 344.000000 127.264889 35.902556 348.000000 
 127.264889 35.902667 341.000000 127.264889 35.902667 346.000000 
 127.264889 35.902778 339.000000 127.264889 35.902778 346.000000 
 127.265000 35.902778 332.000000 127.265000 35.902778 339.000000 
 127.265000 35.902889 332.000000 127.265000 35.902889 340.000000 
 127.265000 35.903000 333.000000 127.265000 35.903000 339.000000 
 127.265000 35.903111 334.000000 127.265000 35.903111 336.000000 
 127.265111 35.903111 327.000000 127.265111 35.903111 333.000000 
 127.265111 35.903222 330.000000 127.265111 35.903222 330.000000 
 127.265111 35.903333 329.000000 127.265111 35.903333 320.000000 
 127.265222 35.903333 326.000000 127.265222 35.903333 320.000000 
 127.265222 35.903444 318.000000 127.265222 35.903444 312.000000 
 127.265222 35.903556 311.000000 127.265222 35.903556 304.000000 
 127.265333 35.903556 310.000000 127.265333 35.903556 304.000000 
 127.265333 35.903667 302.000000 127.265333 35.903667 297.000000 
 127.265333 35.903778 297.000000 127.265333 35.903778 290.000000 
 127.265444 35.903778 295.000000 127.265444 35.903778 289.000000 
 127.265444 35.903889 288.000000 127.265444 35.903889 284.000000 
 127.265444 35.904000 283.000000 127.265444 35.904000 277.000000 
 127.265556 35.904000 282.000000 127.265556 35.904000 276.000000 
 127.265556 35.904111 274.000000 127.265556 35.904111 271.000000 
 127.265556 35.904222 269.000000 127.265556 35.904222 267.000000 
 127.265556 35.904333 265.000000 127.265556 35.904333 262.000000 
 127.265667 35.904333 264.000000 127.265667 35.904333 261.000000 
 127.265667 35.904444 259.000000 127.265667 35.904444 258.000000 
 127.265667 35.904556 257.000000 127.265667 35.904556 255.000000 
 127.265778 35.904556 255.000000 127.265778 35.904556 253.000000 
 127.265778 35.904667 249.000000 127.265778 35.904667 248.000000 
 127.265778 35.904778 246.000000 127.265778 35.904778 244.000000 
 127.265889 35.904778 243.000000 127.265889 35.904778 242.000000 
 127.265889 35.904889 239.000000 127.265889 35.904889 240.000000 
 127.265889 35.905000 238.000000 127.265889 35.905000 237.000000 
 127.266000 35.905000 235.000000 127.266000 35.905000 235.000000 
 127.266000 35.905111 232.000000 127.266000 35.905111 233.000000 
 127.266000 35.905222 231.000000 127.266000 35.905222 230.000000 
 127.266111 35.905222 227.000000 127.266111 35.905222 227.000000 
 127.266111 35.905333 222.000000 127.266111 35.905333 224.000000 
 127.266111 35.905444 220.000000 127.266111 35.905444 220.000000 
 127.266111 35.905556 220.000000 127.266111 35.905556 220.000000 
 127.266222 35.905556 221.000000 127.266222 35.905556 220.000000 
 127.266222 35.905667 223.000000 127.266222 35.905667 222.000000 
 127.266222 35.905778 224.000000 127.266222 35.905778 223.000000 
 127.266333 35.905778 227.000000 127.266333 35.905778 226.000000 
 127.266333 35.905889 228.000000 127.266333 35.905889 227.000000 
 127.266333 35.906000 230.000000 127.266333 35.906000 228.000000 
 127.266444 35.906000 235.000000 127.266444 35.906000 232.000000 
 127.266444 35.906111 238.000000 127.266444 35.906111 234.000000 
 127.266444 35.906222 241.000000 127.266444 35.906222 239.000000 
 127.266556 35.906222 246.000000 127.266556 35.906222 245.000000 
 127.266556 35.906333 249.000000 127.266556 35.906333 247.000000 
 127.266556 35.906444 250.000000 127.266556 35.906444 248.000000 
 127.266667 35.906444 255.000000 127.266667 35.906444 254.000000 
 127.266667 35.906556 259.000000 127.266667 35.906556 256.000000 
 127.266667 35.906667 262.000000 127.266667 35.906667 262.000000 
 127.266667 35.906778 267.000000 127.266667 35.906778 264.000000 
 127.266778 35.906778 274.000000 127.266778 35.906778 271.000000 
 127.266778 35.906889 281.000000 127.266778 35.906889 276.000000 
 127.266778 35.907000 286.000000 127.266778 35.907000 279.000000 
 127.266889 35.907000 292.000000 127.266889 35.907000 286.000000 
 127.266889 35.907111 292.000000 127.266889 35.907111 282.000000 
 127.266889 35.907222 287.000000 127.266889 35.907222 278.000000 
 127.267000 35.907222 292.000000 127.267000 35.907222 283.000000 
 127.267000 35.907333 288.000000 127.267000 35.907333 276.000000 
 127.267000 35.907444 282.000000 127.267000 35.907444 272.000000 
 127.267111 35.907444 287.000000 127.267111 35.907444 278.000000 
 127.267111 35.907556 283.000000 127.267111 35.907556 276.000000 
 127.267111 35.907667 282.000000 127.267111 35.907667 281.000000 
 127.267222 35.907667 286.000000 127.267222 35.907667 286.000000 
 127.267222 35.907778 290.000000 127.267222 35.907778 292.000000 
 127.267222 35.907889 297.000000 127.267222 35.907889 301.000000 
 127.267222 35.908000 305.000000 127.267222 35.908000 304.000000 
 127.267333 35.908000 309.000000 127.267333 35.908000 309.000000 
 127.267333 35.908111 314.000000 127.267333 35.908111 312.000000 
 127.267333 35.908222 319.000000 127.267333 35.908222 310.000000 
 127.267444 35.908222 326.000000 127.267444 35.908222 318.000000 
 127.267444 35.908333 326.000000 127.267444 35.908333 313.000000 
 127.267444 35.908444 320.000000 127.267444 35.908444 310.000000 
 127.267556 35.908444 325.000000 127.267556 35.908444 316.000000 
 127.267556 35.908556 323.000000 127.267556 35.908556 315.000000 
 127.267556 35.908667 326.000000 127.267556 35.908667 315.000000 
 127.267667 35.908667 336.000000 127.267667 35.908667 330.000000 
 127.267667 35.908778 339.000000 127.267667 35.908778 333.000000 
 127.267667 35.908889 346.000000 127.267667 35.908889 336.000000 
 127.267778 35.909000 356.000000 127.267778 35.909000 350.000000 
 127.267778 35.909111 356.000000 127.267778 35.909111 347.000000 
 127.267778 35.909222 354.000000 127.267778 35.909222 342.000000 
 127.267889 35.909222 359.000000 127.267889 35.909222 347.000000 
 127.267889 35.909333 356.000000 127.267889 35.909333 345.000000 
 127.267889 35.909444 354.000000 127.267889 35.909444 345.000000 
 127.268000 35.909444 362.000000 127.268000 35.909444 353.000000 
 127.268000 35.909556 361.000000 127.268000 35.909556 351.000000 
 127.268000 35.909667 359.000000 127.268000 35.909667 350.000000 
 127.268111 35.909667 364.000000 127.268111 35.909667 356.000000 
 127.268111 35.909778 361.000000 127.268111 35.909778 351.000000 
 127.268111 35.909889 355.000000 127.268111 35.909889 343.000000 
 127.268222 35.909889 358.000000 127.268222 35.909889 348.000000 
 127.268222 35.910000 351.000000 127.268222 35.910000 330.000000 
 127.268222 35.910111 334.000000 127.268222 35.910111 322.000000 
 127.268222 35.910222 325.000000 127.268222 35.910222 311.000000 
 127.268333 35.910222 330.000000 127.268333 35.910222 316.000000 
 127.268333 35.910333 320.000000 127.268333 35.910333 308.000000 
 127.268333 35.910444 312.000000 127.268333 35.910444 297.000000 
 127.268444 35.910444 317.000000 127.268444 35.910444 301.000000 
 127.268444 35.910556 306.000000 127.268444 35.910556 294.000000 
 127.268444 35.910667 299.000000 127.268444 35.910667 292.000000 
 127.268556 35.910667 305.000000 127.268556 35.910667 301.000000 
 127.268556 35.910778 307.000000 127.268556 35.910778 304.000000 
 127.268556 35.910889 313.000000 127.268556 35.910889 307.000000 
 127.268667 35.910889 320.000000 127.268667 35.910889 324.000000 
 127.268667 35.911000 330.000000 127.268667 35.911000 325.000000 
 127.268667 35.911111 330.000000 127.268667 35.911111 324.000000 
 127.268778 35.911111 335.000000 127.268778 35.911111 329.000000 
 127.268778 35.911222 335.000000 127.268778 35.911222 327.000000 
 127.268778 35.911333 331.000000 127.268778 35.911333 322.000000 
 127.268778 35.911444 325.000000 127.268778 35.911444 311.000000 
 127.268889 35.911444 325.000000 127.268889 35.911444 312.000000 
 127.268889 35.911556 315.000000 127.268889 35.911556 305.000000 
 127.268889 35.911667 308.000000 127.268889 35.911667 293.000000 
 127.269000 35.911667 316.000000 127.269000 35.911667 301.000000 
 127.269000 35.911778 311.000000 127.269000 35.911778 299.000000 
 127.269000 35.911889 308.000000 127.269000 35.911889 295.000000 
 127.269111 35.911889 315.000000 127.269111 35.911889 303.000000 
 127.269111 35.912000 310.000000 127.269111 35.912000 299.000000 
 127.269111 35.912111 307.000000 127.269111 35.912111 295.000000 
 127.269222 35.912111 312.000000 127.269222 35.912111 302.000000 
 127.269222 35.912222 306.000000 127.269222 35.912222 297.000000 
 127.269222 35.912333 302.000000 127.269222 35.912333 289.000000 
 127.269333 35.912333 305.000000 127.269333 35.912333 293.000000 
 127.269333 35.912444 296.000000 127.269333 35.912444 288.000000 
 127.269333 35.912556 290.000000 127.269333 35.912556 278.000000 
 127.269333 35.912667 280.000000 127.269333 35.912667 270.000000 
 127.269444 35.912667 283.000000 127.269444 35.912667 273.000000 
 127.269444 35.912778 276.000000 127.269444 35.912778 263.000000 
 127.269444 35.912889 268.000000 127.269444 35.912889 264.000000 
 127.269556 35.912889 272.000000 127.269556 35.912889 270.000000 
 127.269556 35.913000 276.000000 127.269556 35.913000 274.000000 
 127.269556 35.913111 283.000000 127.269556 35.913111 284.000000 
 127.269667 35.913111 291.000000 127.269667 35.913111 292.000000 
 127.269667 35.913222 300.000000 127.269667 35.913222 299.000000 
 127.269667 35.913333 308.000000 127.269667 35.913333 307.000000 
 127.269778 35.913333 318.000000 127.269778 35.913333 313.000000 
 127.269778 35.913444 320.000000 127.269778 35.913444 308.000000 
 127.269778 35.913556 314.000000 127.269778 35.913556 299.000000 
 127.269889 35.913556 319.000000 127.269889 35.913556 306.000000 
 127.269889 35.913667 312.000000 127.269889 35.913667 301.000000 
 127.269889 35.913778 307.000000 127.269889 35.913778 293.000000 
 127.269889 35.913889 300.000000 127.269889 35.913889 289.000000 
 127.270000 35.913889 303.000000 127.270000 35.913889 294.000000 
 127.270000 35.914000 295.000000 127.270000 35.914000 283.000000 
 127.270000 35.914111 284.000000 127.270000 35.914111 275.000000 
 127.270111 35.914111 286.000000 127.270111 35.914111 276.000000 
 127.270111 35.914222 280.000000 127.270111 35.914222 268.000000 
 127.270111 35.914333 274.000000 127.270111 35.914333 268.000000 
 127.270222 35.914333 284.000000 127.270222 35.914333 274.000000 
 127.270222 35.914444 283.000000 127.270222 35.914444 274.000000 
 127.270222 35.914556 281.000000 127.270222 35.914556 271.000000 
 127.270333 35.914556 286.000000 127.270333 35.914556 277.000000 
 127.270333 35.914667 281.000000 127.270333 35.914667 271.000000 
 127.270333 35.914778 275.000000 127.270333 35.914778 262.000000 
 127.270333 35.914889 265.000000 127.270333 35.914889 259.000000 
 127.270444 35.914889 271.000000 127.270444 35.914889 266.000000 
 127.270444 35.915000 273.000000 127.270444 35.915000 270.000000 
 127.270444 35.915111 277.000000 127.270444 35.915111 270.000000 
 127.270556 35.915111 280.000000 127.270556 35.915111 274.000000 
 127.270556 35.915222 276.000000 127.270556 35.915222 267.000000 
 127.270556 35.915333 268.000000 127.270556 35.915333 263.000000 
 127.270667 35.915333 269.000000 127.270667 35.915333 264.000000 
 127.270667 35.915444 266.000000 127.270667 35.915444 260.000000 
 127.270667 35.915556 264.000000 127.270667 35.915556 258.000000 
 127.270778 35.915556 269.000000 127.270778 35.915556 262.000000 
 127.270778 35.915667 266.000000 127.270778 35.915667 258.000000 
 127.270778 35.915778 261.000000 127.270778 35.915778 255.000000 
 127.270889 35.915778 263.000000 127.270889 35.915778 257.000000 
 127.270889 35.915889 259.000000 127.270889 35.915889 246.000000 
 127.270889 35.916000 249.000000 127.270889 35.916000 243.000000 
 127.270889 35.916111 247.000000 127.270889 35.916111 247.000000 
 127.271000 35.916111 253.000000 127.271000 35.916111 254.000000 
 127.271000 35.916222 263.000000 127.271000 35.916222 260.000000 
 127.271000 35.916333 266.000000 127.271000 35.916333 262.000000 
 127.271111 35.916333 274.000000 127.271111 35.916333 268.000000 
 127.271111 35.916444 274.000000 127.271111 35.916444 267.000000 
 127.271111 35.916556 274.000000 127.271111 35.916556 265.000000 
 127.271222 35.916556 283.000000 127.271222 35.916556 272.000000 
 127.271222 35.916667 281.000000 127.271222 35.916667 269.000000 
 127.271222 35.916778 278.000000 127.271222 35.916778 267.000000 
 127.271333 35.916778 285.000000 127.271333 35.916778 275.000000 
 127.271333 35.916889 282.000000 127.271333 35.916889 271.000000 
 127.271333 35.917000 278.000000 127.271333 35.917000 266.000000 
 127.271333 35.917111 272.000000 127.271333 35.917111 256.000000 
 127.271444 35.917111 276.000000 127.271444 35.917111 260.000000 
 127.271444 35.917222 265.000000 127.271444 35.917222 253.000000 
 127.271444 35.917333 258.000000 127.271444 35.917333 249.000000 
 127.271556 35.917333 263.000000 127.271556 35.917333 254.000000 
 127.271556 35.917444 258.000000 127.271556 35.917444 257.000000 
 127.271556 35.917556 262.000000 127.271556 35.917556 265.000000 
 127.271667 35.917556 266.000000 127.271667 35.917556 269.000000 
 127.271667 35.917667 276.000000 127.271667 35.917667 277.000000 
 127.271667 35.917778 283.000000 127.271667 35.917778 288.000000 
 127.271778 35.917778 287.000000 127.271778 35.917778 293.000000 
 127.271778 35.917889 299.000000 127.271778 35.917889 302.000000 
 127.271778 35.918000 306.000000 127.271778 35.918000 310.000000 
 127.271889 35.918000 309.000000 127.271889 35.918000 314.000000 
 127.271889 35.918111 319.000000 127.271889 35.918111 318.000000 
 127.271889 35.918222 324.000000 127.271889 35.918222 319.000000 
 127.271889 35.918333 325.000000 127.271889 35.918333 316.000000 
 127.272000 35.918333 329.000000 127.272000 35.918333 318.000000 
 127.272000 35.918444 319.000000 127.272000 35.918444 313.000000 
 127.272000 35.918556 312.000000 127.272000 35.918556 304.000000 
 127.272111 35.918556 310.000000 127.272111 35.918556 302.000000 
 127.272111 35.918667 300.000000 127.272111 35.918667 294.000000 
 127.272111 35.918778 292.000000 127.272111 35.918778 284.000000 
 127.272222 35.918778 291.000000 127.272222 35.918778 282.000000 
 127.272222 35.918889 281.000000 127.272222 35.918889 276.000000 
 127.272222 35.919000 274.000000 127.272222 35.919000 266.000000 
 127.272333 35.919000 275.000000 127.272333 35.919000 267.000000 
 127.272333 35.919111 272.000000 127.272333 35.919111 266.000000 
 127.272333 35.919222 273.000000 127.272333 35.919222 268.000000 
 127.272333 35.919333 275.000000 127.272333 35.919333 269.000000 
 127.272444 35.919333 284.000000 127.272444 35.919333 276.000000 
 127.272444 35.919444 285.000000 127.272444 35.919444 278.000000 
 127.272444 35.919556 287.000000 127.272444 35.919556 279.000000 
 127.272556 35.919556 297.000000 127.272556 35.919556 287.000000 
 127.272556 35.919667 297.000000 127.272556 35.919667 286.000000 
 127.272556 35.919778 293.000000 127.272556 35.919778 283.000000 
 127.272667 35.919778 300.000000 127.272667 35.919778 289.000000 
 127.272667 35.919889 293.000000 127.272667 35.919889 283.000000 
 127.272667 35.920000 286.000000 127.272667 35.920000 273.000000 
 127.272778 35.920000 290.000000 127.272778 35.920000 281.000000 
 127.272778 35.920111 287.000000 127.272778 35.920111 276.000000 
 127.272778 35.920222 284.000000 127.272778 35.920222 273.000000 
 127.272889 35.920222 290.000000 127.272889 35.920222 281.000000 
 127.272889 35.920333 288.000000 127.272889 35.920333 280.000000 
 127.272889 35.920444 287.000000 127.272889 35.920444 279.000000 
 127.272889 35.920556 286.000000 127.272889 35.920556 279.000000 
 127.273000 35.920556 294.000000 127.273000 35.920556 286.000000 
 127.273000 35.920667 293.000000 127.273000 35.920667 285.000000 
 127.273000 35.920778 289.000000 127.273000 35.920778 284.000000 
 127.273111 35.920778 293.000000 127.273111 35.920778 287.000000 
 127.273111 35.920889 288.000000 127.273111 35.920889 282.000000 
 127.273111 35.921000 282.000000 127.273111 35.921000 279.000000 
 127.273222 35.921000 279.000000 127.273222 35.921000 278.000000 
 127.273222 35.921111 275.000000 127.273222 35.921111 270.000000 
 127.273222 35.921222 268.000000 127.273222 35.921222 266.000000 
 127.273333 35.921222 264.000000 127.273333 35.921222 264.000000 
 127.273333 35.921333 261.000000 127.273333 35.921333 258.000000 
 127.273333 35.921444 255.000000 127.273333 35.921444 254.000000 
 127.273333 35.921556 250.000000 127.273333 35.921556 247.000000 
 127.273444 35.921556 246.000000 127.273444 35.921556 244.000000 
 127.273444 35.921667 239.000000 127.273444 35.921667 239.000000 
 127.273444 35.921778 235.000000 127.273444 35.921778 235.000000 
 127.273556 35.921778 227.000000 127.273556 35.921778 228.000000 
 127.273556 35.921889 223.000000 127.273556 35.921889 224.000000 
 127.273556 35.922000 219.000000 127.273556 35.922000 221.000000 
 127.273667 35.922000 215.000000 127.273667 35.922000 216.000000 
 127.273667 35.922111 212.000000 127.273667 35.922111 212.000000 
 127.273667 35.922222 208.000000 127.273667 35.922222 210.000000 
 127.273778 35.922222 204.000000 127.273778 35.922222 206.000000 
 127.273778 35.922333 201.000000 127.273778 35.922333 204.000000 
 127.273778 35.922444 198.000000 127.273778 35.922444 202.000000 
 127.273889 35.922556 193.000000 127.273889 35.922556 196.000000 
 127.273889 35.922667 190.000000 127.273889 35.922667 192.000000 
 127.273889 35.922778 188.000000 127.273889 35.922778 187.000000 
 127.274000 35.922778 185.000000 127.274000 35.922778 183.000000 
 127.274000 35.922889 181.000000 127.274000 35.922889 179.000000 
 127.274000 35.923000 178.000000 127.274000 35.923000 175.000000 
 127.274111 35.923000 177.000000 127.274111 35.923000 174.000000 
 127.274111 35.923111 173.000000 127.274111 35.923111 172.000000 
 127.274111 35.923222 171.000000 127.274111 35.923222 169.000000 
 127.274222 35.923222 171.000000 127.274222 35.923222 169.000000 
 127.274222 35.923333 168.000000 127.274222 35.923333 167.000000 
 127.274222 35.923444 167.000000 127.274222 35.923444 166.000000 
 127.274333 35.923444 167.000000 127.274333 35.923444 166.000000 
 127.274333 35.923556 166.000000 127.274333 35.923556 165.000000 
 127.274333 35.923667 164.000000 127.274333 35.923667 164.000000 
 127.274333 35.923778 164.000000 127.274333 35.923778 163.000000 
 127.274444 35.923778 163.000000 127.274444 35.923778 163.000000 
 127.274444 35.923889 162.000000 127.274444 35.923889 162.000000 
 127.274444 35.924000 162.000000 127.274444 35.924000 161.000000 
 127.274556 35.924000 161.000000 127.274556 35.924000 161.000000 
 127.274556 35.924111 160.000000 127.274556 35.924111 160.000000 
 127.274556 35.924222 160.000000 127.274556 35.924222 160.000000 
 127.274667 35.924222 160.000000 127.274667 35.924222 160.000000 
 127.274667 35.924333 160.000000 127.274667 35.924333 160.000000 
 127.274667 35.924444 160.000000 127.274667 35.924444 160.000000 
 127.274778 35.924444 160.000000 127.274778 35.924444 161.000000 
 127.274778 35.924556 161.000000 127.274778 35.924556 161.000000 
 127.274778 35.924667 162.000000 127.274778 35.924667 162.000000 
 127.274778 35.924778 163.000000 127.274778 35.924778 162.000000 
 127.274889 35.924778 163.000000 127.274889 35.924778 163.000000 
 127.274889 35.924889 164.000000 127.274889 35.924889 163.000000 
 127.274889 35.925000 164.000000 127.274889 35.925000 164.000000 
 127.275000 35.925000 169.000000 127.275000 35.925000 166.000000 
 127.275000 35.925111 171.000000 127.275000 35.925111 169.000000 
 127.275000 35.925222 173.000000 127.275000 35.925222 171.000000 
 127.275111 35.925222 182.000000 127.275111 35.925222 176.000000 
 127.275111 35.925333 184.000000 127.275111 35.925333 180.000000 
 127.275111 35.925444 188.000000 127.275111 35.925444 185.000000 
 127.275222 35.925444 195.000000 127.275222 35.925444 191.000000 
 127.275222 35.925556 198.000000 127.275222 35.925556 193.000000 
 127.275222 35.925667 199.000000 127.275222 35.925667 195.000000 
 127.275333 35.925778 207.000000 127.275333 35.925778 203.000000 
 127.275333 35.925889 209.000000 127.275333 35.925889 212.000000 
 127.275333 35.926000 217.000000 127.275333 35.926000 218.000000 
 127.275444 35.926000 222.000000 127.275444 35.926000 224.000000 
 127.275444 35.926111 227.000000 127.275444 35.926111 228.000000 
 127.275444 35.926222 233.000000 127.275444 35.926222 229.000000 
 127.275556 35.926222 237.000000 127.275556 35.926222 236.000000 
 127.275556 35.926333 241.000000 127.275556 35.926333 240.000000 
 127.275556 35.926444 246.000000 127.275556 35.926444 241.000000 
 127.275667 35.926444 252.000000 127.275667 35.926444 247.000000 
 127.275667 35.926556 255.000000 127.275667 35.926556 252.000000 
 127.275667 35.926667 262.000000 127.275667 35.926667 260.000000 
 127.275778 35.926667 274.000000 127.275778 35.926667 266.000000 
 127.275778 35.926778 276.000000 127.275778 35.926778 276.000000 
 127.275778 35.926889 281.000000 127.275778 35.926889 284.000000 
 127.275778 35.927000 288.000000 127.275778 35.927000 299.000000 
 127.275889 35.927000 298.000000 127.275889 35.927000 298.000000 
 127.275889 35.927111 303.000000 127.275889 35.927111 311.000000 
 127.275889 35.927222 315.000000 127.275889 35.927222 318.000000 
 127.276000 35.927222 320.000000 127.276000 35.927222 324.000000 
 127.276000 35.927333 327.000000 127.276000 35.927333 331.000000 
 127.276000 35.927444 334.000000 127.276000 35.927444 331.000000 
 127.276111 35.927444 338.000000 127.276111 35.927444 335.000000 
 127.276111 35.927556 340.000000 127.276111 35.927556 335.000000 
 127.276111 35.927667 340.000000 127.276111 35.927667 334.000000 
 127.276222 35.927667 351.000000 127.276222 35.927667 340.000000 
 127.276222 35.927778 349.000000 127.276222 35.927778 340.000000 
 127.276222 35.927889 349.000000 127.276222 35.927889 340.000000 
 127.276222 35.928000 349.000000 127.276222 35.928000 339.000000 
 127.276333 35.928000 355.000000 127.276333 35.928000 346.000000 
 127.276333 35.928111 352.000000 127.276333 35.928111 343.000000 
 127.276333 35.928222 349.000000 127.276333 35.928222 339.000000 
 127.276444 35.928222 354.000000 127.276444 35.928222 345.000000 
 127.276444 35.928333 350.000000 127.276444 35.928333 342.000000 
 127.276444 35.928444 347.000000 127.276444 35.928444 338.000000 
 127.276556 35.928444 351.000000 127.276556 35.928444 342.000000 
 127.276556 35.928556 347.000000 127.276556 35.928556 339.000000 
 127.276556 35.928667 345.000000 127.276556 35.928667 337.000000 
 127.276667 35.928667 349.000000 127.276667 35.928667 341.000000 
 127.276667 35.928778 346.000000 127.276667 35.928778 337.000000 
 127.276667 35.928889 341.000000 127.276667 35.928889 335.000000 
 127.276778 35.928889 347.000000 127.276778 35.928889 338.000000 
 127.276778 35.929000 343.000000 127.276778 35.929000 335.000000 
 127.276778 35.929111 338.000000 127.276778 35.929111 333.000000 
 127.276778 35.929222 336.000000 127.276778 35.929222 327.000000 
 127.276889 35.929222 339.000000 127.276889 35.929222 330.000000 
 127.276889 35.929333 334.000000 127.276889 35.929333 327.000000 
 127.276889 35.929444 329.000000 127.276889 35.929444 319.000000 
 127.277000 35.929444 332.000000 127.277000 35.929444 323.000000 
 127.277000 35.929556 326.000000 127.277000 35.929556 317.000000 
 127.277000 35.929667 320.000000 127.277000 35.929667 309.000000 
 127.277111 35.929667 322.000000 127.277111 35.929667 311.000000 
 127.277111 35.929778 314.000000 127.277111 35.929778 306.000000 
 127.277111 35.929889 308.000000 127.277111 35.929889 297.000000 
 127.277222 35.929889 312.000000 127.277222 35.929889 300.000000 
 127.277222 35.930000 304.000000 127.277222 35.930000 296.000000 
 127.277222 35.930111 298.000000 127.277222 35.930111 289.000000 
 127.277222 35.930222 292.000000 127.277222 35.930222 285.000000 
 127.277333 35.930222 295.000000 127.277333 35.930222 287.000000 
 127.277333 35.930333 289.000000 127.277333 35.930333 280.000000 
 127.277333 35.930444 282.000000 127.277333 35.930444 275.000000 
 127.277444 35.930444 284.000000 127.277444 35.930444 278.000000 
 127.277444 35.930556 280.000000 127.277444 35.930556 272.000000 
 127.277444 35.930667 275.000000 127.277444 35.930667 264.000000 
 127.277556 35.930667 277.000000 127.277556 35.930667 266.000000 
 127.277556 35.930778 269.000000 127.277556 35.930778 263.000000 
 127.277556 35.930889 265.000000 127.277556 35.930889 269.000000 
 127.277667 35.930889 267.000000 127.277667 35.930889 270.000000 
 127.277667 35.931000 272.000000 127.277667 35.931000 277.000000 
 127.277667 35.931111 278.000000 127.277667 35.931111 284.000000 
 127.277778 35.931111 280.000000 127.277778 35.931111 285.000000 
 127.277778 35.931222 287.000000 127.277778 35.931222 291.000000 
 127.277778 35.931333 294.000000 127.277778 35.931333 302.000000 
 127.277778 35.931444 304.000000 127.277778 35.931444 306.000000 
 127.277889 35.931444 306.000000 127.277889 35.931444 308.000000 
 127.277889 35.931556 310.000000 127.277889 35.931556 316.000000 
 127.277889 35.931667 319.000000 127.277889 35.931667 322.000000 
 127.278000 35.931667 322.000000 127.278000 35.931667 327.000000 
 127.278000 35.931778 330.000000 127.278000 35.931778 335.000000 
 127.278000 35.931889 338.000000 127.278000 35.931889 340.000000 
 127.278111 35.931889 340.000000 127.278111 35.931889 343.000000 
 127.278111 35.932000 347.000000 127.278111 35.932000 352.000000 
 127.278111 35.932111 355.000000 127.278111 35.932111 356.000000 
 127.278222 35.932111 358.000000 127.278222 35.932111 360.000000 
 127.278222 35.932222 362.000000 127.278222 35.932222 365.000000 
 127.278222 35.932333 368.000000 127.278222 35.932333 376.000000 
 127.278222 35.932444 379.000000 127.278222 35.932444 382.000000 
 127.278333 35.932444 382.000000 127.278333 35.932444 384.000000 
 127.278333 35.932556 388.000000 127.278333 35.932556 394.000000 
 127.278333 35.932667 398.000000 127.278333 35.932667 401.000000 
 127.278444 35.932667 402.000000 127.278444 35.932667 405.000000 
 127.278444 35.932778 408.000000 127.278444 35.932778 413.000000 
 127.278444 35.932889 416.000000 127.278444 35.932889 417.000000 
 127.278556 35.932889 419.000000 127.278556 35.932889 420.000000 
 127.278556 35.933000 425.000000 127.278556 35.933000 428.000000 
 127.278556 35.933111 432.000000 127.278556 35.933111 431.000000 
 127.278667 35.933111 436.000000 127.278667 35.933111 436.000000 
 127.278667 35.933222 441.000000 127.278667 35.933222 438.000000 
 127.278667 35.933333 445.000000 127.278667 35.933333 438.000000 
 127.278778 35.933333 452.000000 127.278778 35.933333 445.000000 
 127.278778 35.933444 452.000000 127.278778 35.933444 444.000000 
 127.278778 35.933556 451.000000 127.278778 35.933556 442.000000 
 127.278778 35.933667 449.000000 127.278778 35.933667 439.000000 
 127.278889 35.933667 457.000000 127.278889 35.933667 447.000000 
 127.278889 35.933778 454.000000 127.278889 35.933778 446.000000 
 127.278889 35.933889 454.000000 127.278889 35.933889 446.000000 
 127.279000 35.933889 463.000000 127.279000 35.933889 455.000000 
 127.279000 35.934000 464.000000 127.279000 35.934000 457.000000 
 127.279000 35.934111 465.000000 127.279000 35.934111 460.000000 
 127.279111 35.934111 472.000000 127.279111 35.934111 467.000000 
 127.279111 35.934222 473.000000 127.279111 35.934222 471.000000 
 127.279111 35.934333 479.000000 127.279111 35.934333 475.000000 
 127.279222 35.934333 482.000000 127.279222 35.934333 480.000000 
 127.279222 35.934444 481.000000 127.279222 35.934444 476.000000 
 127.279222 35.934556 472.000000 127.279222 35.934556 470.000000 
 127.279333 35.934556 466.000000 127.279333 35.934556 463.000000 
 127.279333 35.934667 456.000000 127.279333 35.934667 451.000000 
 127.279333 35.934778 445.000000 127.279333 35.934778 444.000000 
 127.279333 35.934889 438.000000 127.279333 35.934889 434.000000 
 127.279444 35.934889 433.000000 127.279444 35.934889 429.000000 
 127.279444 35.935000 422.000000 127.279444 35.935000 422.000000 
 127.279444 35.935111 417.000000 127.279444 35.935111 412.000000 
 127.279556 35.935111 415.000000 127.279556 35.935111 409.000000 
 127.279556 35.935222 407.000000 127.279556 35.935222 404.000000 
 127.279556 35.935333 401.000000 127.279556 35.935333 393.000000 
 127.279667 35.935333 398.000000 127.279667 35.935333 389.000000 
 127.279667 35.935444 387.000000 127.279667 35.935444 383.000000 
 127.279667 35.935556 383.000000 127.279667 35.935556 374.000000 
 127.279778 35.935556 387.000000 127.279778 35.935556 378.000000 
 127.279778 35.935667 384.000000 127.279778 35.935667 375.000000 
 127.279778 35.935778 383.000000 127.279778 35.935778 372.000000 
 127.279889 35.935889 389.000000 127.279889 35.935889 377.000000 
 127.279889 35.936000 385.000000 127.279889 35.936000 375.000000 
 127.279889 35.936111 382.000000 127.279889 35.936111 372.000000 
 127.280000 35.936111 390.000000 127.280000 35.936111 379.000000 
 127.280000 35.936222 386.000000 127.280000 35.936222 377.000000 
 127.280000 35.936333 384.000000 127.280000 35.936333 374.000000 
 127.280111 35.936333 390.000000 127.280111 35.936333 379.000000 
 127.280111 35.936444 385.000000 127.280111 35.936444 377.000000 
 127.280111 35.936556 383.000000 127.280111 35.936556 372.000000 
 127.280222 35.936556 388.000000 127.280222 35.936556 377.000000 
 127.280222 35.936667 383.000000 127.280222 35.936667 374.000000 
 127.280222 35.936778 380.000000 127.280222 35.936778 367.000000 
 127.280333 35.936778 385.000000 127.280333 35.936778 372.000000 
 127.280333 35.936889 378.000000 127.280333 35.936889 368.000000 
 127.280333 35.937000 372.000000 127.280333 35.937000 362.000000 
 127.280444 35.937111 368.000000 127.280444 35.937111 362.000000 
 127.280444 35.937222 365.000000 127.280444 35.937222 354.000000 
 127.280444 35.937333 358.000000 127.280444 35.937333 349.000000 
 127.280556 35.937333 359.000000 127.280556 35.937333 352.000000 
 127.280556 35.937444 354.000000 127.280556 35.937444 346.000000 
 127.280556 35.937556 347.000000 127.280556 35.937556 338.000000 
 127.280667 35.937556 347.000000 127.280667 35.937556 338.000000 
 127.280667 35.937667 337.000000 127.280667 35.937667 333.000000 
 127.280667 35.937778 331.000000 127.280667 35.937778 326.000000 
 127.280778 35.937778 324.000000 127.280778 35.937778 320.000000 
 127.280778 35.937889 315.000000 127.280778 35.937889 312.000000 
 127.280778 35.938000 309.000000 127.280778 35.938000 302.000000 
 127.280889 35.938000 304.000000 127.280889 35.938000 299.000000 
 127.280889 35.938111 295.000000 127.280889 35.938111 292.000000 
 127.280889 35.938222 291.000000 127.280889 35.938222 285.000000 
 127.281000 35.938333 291.000000 127.281000 35.938333 288.000000 
 127.281000 35.938444 292.000000 127.281000 35.938444 291.000000 
 127.281000 35.938556 297.000000 127.281000 35.938556 294.000000 
 127.281111 35.938556 306.000000 127.281111 35.938556 303.000000 
 127.281111 35.938667 309.000000 127.281111 35.938667 306.000000 
 127.281111 35.938778 312.000000 127.281111 35.938778 306.000000 
 127.281222 35.938778 320.000000 127.281222 35.938778 312.000000 
 127.281222 35.938889 318.000000 127.281222 35.938889 310.000000 
 127.281222 35.939000 314.000000 127.281222 35.939000 306.000000 
 127.281333 35.939000 322.000000 127.281333 35.939000 312.000000 
 127.281333 35.939111 317.000000 127.281333 35.939111 306.000000 
 127.281333 35.939222 313.000000 127.281333 35.939222 303.000000 
 127.281444 35.939222 315.000000 127.281444 35.939222 310.000000 
 127.281444 35.939333 311.000000 127.281444 35.939333 307.000000 
 127.281444 35.939444 307.000000 127.281444 35.939444 302.000000 
 127.281556 35.939444 305.000000 127.281556 35.939444 299.000000 
 127.281556 35.939556 296.000000 127.281556 35.939556 294.000000 
 127.281556 35.939667 291.000000 127.281556 35.939667 286.000000 
 127.281556 35.939778 283.000000 127.281556 35.939778 278.000000 
 127.281667 35.939778 282.000000 127.281667 35.939778 277.000000 
 127.281667 35.939889 278.000000 127.281667 35.939889 271.000000 
 127.281667 35.940000 272.000000 127.281667 35.940000 268.000000 
 127.281778 35.940000 275.000000 127.281778 35.940000 269.000000 
 127.281778 35.940111 274.000000 127.281778 35.940111 268.000000 
 127.281778 35.940222 273.000000 127.281778 35.940222 268.000000 
 127.281889 35.940222 278.000000 127.281889 35.940222 273.000000 
 127.281889 35.940333 278.000000 127.281889 35.940333 273.000000 
 127.281889 35.940444 279.000000 127.281889 35.940444 274.000000 
 127.282000 35.940444 284.000000 127.282000 35.940444 281.000000 
 127.282000 35.940556 287.000000 127.282000 35.940556 285.000000 
 127.282000 35.940667 293.000000 127.282000 35.940667 288.000000 
 127.282111 35.940667 300.000000 127.282111 35.940667 298.000000 
 127.282111 35.940778 303.000000 127.282111 35.940778 301.000000 
 127.282111 35.940889 306.000000 127.282111 35.940889 302.000000 
 127.282111 35.941000 306.000000 127.282111 35.941000 302.000000 
 127.282222 35.941000 312.000000 127.282222 35.941000 307.000000 
 127.282222 35.941111 312.000000 127.282222 35.941111 307.000000 
 127.282222 35.941222 313.000000 127.282222 35.941222 307.000000 
 127.282333 35.941222 319.000000 127.282333 35.941222 312.000000 
 127.282333 35.941333 319.000000 127.282333 35.941333 312.000000 
 127.282333 35.941444 318.000000 127.282333 35.941444 312.000000 
 127.282444 35.941444 325.000000 127.282444 35.941444 317.000000 
 127.282444 35.941556 324.000000 127.282444 35.941556 317.000000 
 127.282444 35.941667 324.000000 127.282444 35.941667 318.000000 
 127.282556 35.941667 336.000000 127.282556 35.941667 324.000000 
 127.282556 35.941778 335.000000 127.282556 35.941778 328.000000 
 127.282556 35.941889 336.000000 127.282556 35.941889 334.000000 
 127.282667 35.941889 345.000000 127.282667 35.941889 338.000000 
 127.282667 35.942000 345.000000 127.282667 35.942000 343.000000 
 127.282667 35.942111 348.000000 127.282667 35.942111 345.000000 
 127.282667 35.942222 351.000000 127.282667 35.942222 351.000000 
 127.282778 35.942222 356.000000 127.282778 35.942222 356.000000 
 127.282778 35.942333 359.000000 127.282778 35.942333 358.000000 
 127.282778 35.942444 361.000000 127.282778 35.942444 360.000000 
 127.282889 35.942444 366.000000 127.282889 35.942444 364.000000 
 127.282889 35.942556 370.000000 127.282889 35.942556 366.000000 
 127.282889 35.942667 373.000000 127.282889 35.942667 369.000000 
 127.283000 35.942667 381.000000 127.283000 35.942667 379.000000 
 127.283000 35.942778 384.000000 127.283000 35.942778 381.000000 
 127.283000 35.942889 387.000000 127.283000 35.942889 384.000000 
 127.283111 35.942889 393.000000 127.283111 35.942889 390.000000 
 127.283111 35.943000 395.000000 127.283111 35.943000 394.000000 
 127.283111 35.943111 399.000000 127.283111 35.943111 396.000000 
 127.283222 35.943111 406.000000 127.283222 35.943111 401.000000 
 127.283222 35.943222 408.000000 127.283222 35.943222 405.000000 
 127.283222 35.943333 408.000000 127.283222 35.943333 407.000000 
 127.283333 35.943333 409.000000 127.283333 35.943333 409.000000 
 127.283333 35.943444 406.000000 127.283333 35.943444 407.000000 
 127.283333 35.943556 402.000000 127.283333 35.943556 406.000000 
 127.283333 35.943667 398.000000 127.283333 35.943667 402.000000 
 127.283444 35.943667 389.000000 127.283444 35.943667 392.000000 
 127.283444 35.943778 384.000000 127.283444 35.943778 387.000000 
 127.283444 35.943889 380.000000 127.283444 35.943889 381.000000 
 127.283556 35.943889 373.000000 127.283556 35.943889 374.000000 
 127.283556 35.944000 367.000000 127.283556 35.944000 369.000000 
 127.283556 35.944111 364.000000 127.283556 35.944111 365.000000 
 127.283667 35.944111 360.000000 127.283667 35.944111 361.000000 
 127.283667 35.944222 357.000000 127.283667 35.944222 359.000000 
 127.283667 35.944333 355.000000 127.283667 35.944333 355.000000 
 127.283778 35.944333 348.000000 127.283778 35.944333 348.000000 
 127.283778 35.944444 342.000000 127.283778 35.944444 345.000000 
 127.283778 35.944556 338.000000 127.283778 35.944556 341.000000 
 127.283889 35.944556 331.000000 127.283889 35.944556 334.000000 
 127.283889 35.944667 325.000000 127.283889 35.944667 328.000000 
 127.283889 35.944778 322.000000 127.283889 35.944778 329.000000 
 127.283889 35.944889 322.000000 127.283889 35.944889 331.000000 
 127.284000 35.944889 317.000000 127.284000 35.944889 324.000000 
 127.284000 35.945000 320.000000 127.284000 35.945000 326.000000 
 127.284000 35.945111 321.000000 127.284000 35.945111 329.000000 
 127.284111 35.945111 317.000000 127.284111 35.945111 323.000000 
 127.284111 35.945222 319.000000 127.284111 35.945222 324.000000 
 127.284111 35.945333 320.000000 127.284111 35.945333 325.000000 
 127.284222 35.945333 314.000000 127.284222 35.945333 318.000000 
 127.284222 35.945444 313.000000 127.284222 35.945444 315.000000 
 127.284222 35.945556 311.000000 127.284222 35.945556 311.000000 
 127.284333 35.945556 306.000000 127.284333 35.945556 306.000000 
 127.284333 35.945667 299.000000 127.284333 35.945667 303.000000 
 127.284333 35.945778 296.000000 127.284333 35.945778 298.000000 
 127.284444 35.945778 289.000000 127.284444 35.945778 293.000000 
 127.284444 35.945889 287.000000 127.284444 35.945889 293.000000 
 127.284444 35.946000 285.000000 127.284444 35.946000 294.000000 
 127.284556 35.946000 276.000000 127.284556 35.946000 284.000000 
 127.284556 35.946111 275.000000 127.284556 35.946111 284.000000 
 127.284556 35.946222 275.000000 127.284556 35.946222 285.000000 
 127.284556 35.946333 276.000000 127.284556 35.946333 289.000000 
 127.284667 35.946333 271.000000 127.284667 35.946333 282.000000 
 127.284667 35.946444 274.000000 127.284667 35.946444 286.000000 
 127.284667 35.946556 282.000000 127.284667 35.946556 294.000000 
 127.284778 35.946556 279.000000 127.284778 35.946556 289.000000 
 127.284778 35.946667 286.000000 127.284778 35.946667 294.000000 
 127.284778 35.946778 291.000000 127.284778 35.946778 302.000000 
 127.284889 35.946778 289.000000 127.284889 35.946778 298.000000 
 127.284889 35.946889 293.000000 127.284889 35.946889 301.000000 
 127.284889 35.947000 294.000000 127.284889 35.947000 300.000000 
 127.285000 35.947000 289.000000 127.285000 35.947000 292.000000 
 127.285000 35.947111 287.000000 127.285000 35.947111 291.000000 
 127.285000 35.947222 286.000000 127.285000 35.947222 288.000000 
 127.285111 35.947222 278.000000 127.285111 35.947222 283.000000 
 127.285111 35.947333 276.000000 127.285111 35.947333 282.000000 
 127.285111 35.947444 276.000000 127.285111 35.947444 284.000000 
 127.285222 35.947444 268.000000 127.285222 35.947444 278.000000 
 127.285222 35.947556 271.000000 127.285222 35.947556 282.000000 
 127.285222 35.947667 277.000000 127.285222 35.947667 291.000000 
 127.285222 35.947778 286.000000 127.285222 35.947778 294.000000 
 127.285333 35.947778 282.000000 127.285333 35.947778 291.000000 
 127.285333 35.947889 289.000000 127.285333 35.947889 298.000000 
 127.285333 35.948000 295.000000 127.285333 35.948000 304.000000 
 127.285444 35.948000 294.000000 127.285444 35.948000 302.000000 
 127.285444 35.948111 301.000000 127.285444 35.948111 310.000000 
 127.285444 35.948222 306.000000 127.285444 35.948222 314.000000 
 127.285556 35.948222 302.000000 127.285556 35.948222 304.000000 
 127.285556 35.948333 296.000000 127.285556 35.948333 302.000000 
 127.285556 35.948444 294.000000 127.285556 35.948444 300.000000 
 127.285667 35.948444 289.000000 127.285667 35.948444 292.000000 
 127.285667 35.948556 286.000000 127.285667 35.948556 290.000000 
 127.285667 35.948667 284.000000 127.285667 35.948667 287.000000 
 127.285778 35.948667 280.000000 127.285778 35.948667 280.000000 
 127.285778 35.948778 276.000000 127.285778 35.948778 275.000000 
 127.285778 35.948889 272.000000 127.285778 35.948889 272.000000 
 127.285778 35.949000 268.000000 127.285778 35.949000 272.000000 
 127.285889 35.949000 265.000000 127.285889 35.949000 267.000000 
 127.285889 35.949111 264.000000 127.285889 35.949111 267.000000 
 127.285889 35.949222 263.000000 127.285889 35.949222 267.000000 
 127.286000 35.949222 259.000000 127.286000 35.949222 263.000000 
 127.286000 35.949333 259.000000 127.286000 35.949333 263.000000 
 127.286000 35.949444 259.000000 127.286000 35.949444 263.000000 
 127.286111 35.949444 256.000000 127.286111 35.949444 259.000000 
 127.286111 35.949556 255.000000 127.286111 35.949556 258.000000 
 127.286111 35.949667 252.000000 127.286111 35.949667 257.000000 
 127.286222 35.949667 248.000000 127.286222 35.949667 250.000000 
 127.286222 35.949778 247.000000 127.286222 35.949778 249.000000 
 127.286222 35.949889 246.000000 127.286222 35.949889 247.000000 
 127.286333 35.949889 242.000000 127.286333 35.949889 244.000000 
 127.286333 35.950000 240.000000 127.286333 35.950000 242.000000 
 127.286333 35.950111 239.000000 127.286333 35.950111 238.000000 
 127.286444 35.950111 235.000000 127.286444 35.950111 235.000000 
 127.286444 35.950222 231.000000 127.286444 35.950222 230.000000 
 127.286444 35.950333 226.000000 127.286444 35.950333 223.000000 
 127.286444 35.950444 219.000000 127.286444 35.950444 217.000000 
 127.286556 35.950444 216.000000 127.286556 35.950444 215.000000 
 127.286556 35.950556 212.000000 127.286556 35.950556 208.000000 
 127.286556 35.950667 206.000000 127.286556 35.950667 203.000000 
 127.286667 35.950667 203.000000 127.286667 35.950667 201.000000 
 127.286667 35.950778 198.000000 127.286667 35.950778 195.000000 
 127.286667 35.950889 192.000000 127.286667 35.950889 191.000000 
 127.286778 35.950889 190.000000 127.286778 35.950889 189.000000 
 127.286778 35.951000 187.000000 127.286778 35.951000 184.000000 
 127.286778 35.951111 184.000000 127.286778 35.951111 182.000000 
 127.286889 35.951111 183.000000 127.286889 35.951111 182.000000 
 127.286889 35.951222 182.000000 127.286889 35.951222 179.000000 
 127.286889 35.951333 179.000000 127.286889 35.951333 174.000000 
 127.287000 35.951333 178.000000 127.287000 35.951333 174.000000 
 127.287000 35.951444 175.000000 127.287000 35.951444 164.000000 
 127.287000 35.951556 164.000000 127.287000 35.951556 160.000000 
 127.287111 35.951556 163.000000 127.287111 35.951556 159.000000 
 127.287111 35.951667 158.000000 127.287111 35.951667 154.000000 
 127.287111 35.951778 153.000000 127.287111 35.951778 147.000000 
 127.287111 35.951889 146.000000 127.287111 35.951889 143.000000 
 127.287222 35.951889 145.000000 127.287222 35.951889 143.000000 
 127.287222 35.952000 143.000000 127.287222 35.952000 140.000000 
 127.287222 35.952111 140.000000 127.287222 35.952111 140.000000 
 127.287333 35.952111 141.000000 127.287333 35.952111 140.000000 
 127.287333 35.952222 140.000000 127.287333 35.952222 140.000000 
 127.287333 35.952333 140.000000 127.287333 35.952333 140.000000 
 127.287444 35.952333 140.000000 127.287444 35.952333 140.000000 
 127.287444 35.952444 140.000000 127.287444 35.952444 140.000000 
 127.287444 35.952556 140.000000 127.287444 35.952556 140.000000 
 127.287556 35.952556 140.000000 127.287556 35.952556 140.000000 
 127.287556 35.952667 140.000000 127.287556 35.952667 140.000000 
 127.287556 35.952778 140.000000 127.287556 35.952778 140.000000 
 127.287667 35.952778 140.000000 127.287667 35.952778 140.000000 
 127.287667 35.952889 140.000000 127.287667 35.952889 140.000000 
 127.287667 35.953000 140.000000 127.287667 35.953000 140.000000 
 127.287778 35.953000 140.000000 127.287778 35.953000 140.000000 
 127.287778 35.953111 140.000000 127.287778 35.953111 140.000000 
 127.287778 35.953222 140.000000 127.287778 35.953222 140.000000 
 127.287778 35.953333 140.000000 127.287778 35.953333 140.000000 
 127.287889 35.953333 140.000000 127.287889 35.953333 140.000000 
 127.287889 35.953444 140.000000 127.287889 35.953444 140.000000 
 127.287889 35.953556 140.000000 127.287889 35.953556 140.000000 
 127.288000 35.953556 140.000000 127.288000 35.953556 140.000000 
 127.288000 35.953667 140.000000 127.288000 35.953667 140.000000 
 127.288000 35.953778 140.000000 127.288000 35.953778 140.000000 
 127.288111 35.953778 140.000000 127.288111 35.953778 140.000000 
 127.288111 35.953889 140.000000 127.288111 35.953889 140.000000 
 127.288111 35.954000 140.000000 127.288111 35.954000 140.000000 
 127.288222 35.954000 140.000000 127.288222 35.954000 140.000000 
 127.288222 35.954111 140.000000 127.288222 35.954111 140.000000 
 127.288222 35.954222 140.000000 127.288222 35.954222 140.000000 
 127.288333 35.954222 140.000000 127.288333 35.954222 140.000000 
 127.288333 35.954333 140.000000 127.288333 35.954333 140.000000 
 127.288333 35.954444 140.000000 127.288333 35.954444 140.000000 
 127.288444 35.954444 140.000000 127.288444 35.954444 140.000000 
 127.288444 35.954556 140.000000 127.288444 35.954556 141.000000 
 127.288444 35.954667 141.000000 127.288444 35.954667 144.000000 
 127.288444 35.954778 144.000000 127.288444 35.954778 148.000000 
 127.288556 35.954778 144.000000 127.288556 35.954778 148.000000 
 127.288556 35.954889 148.000000 127.288556 35.954889 151.000000 
 127.288556 35.955000 151.000000 127.288556 35.955000 154.000000 
 127.288667 35.955000 152.000000 127.288667 35.955000 154.000000 
 127.288667 35.955111 156.000000 127.288667 35.955111 158.000000 
 127.288667 35.955222 158.000000 127.288667 35.955222 160.000000 
 127.288778 35.955222 157.000000 127.288778 35.955222 160.000000 
 127.288778 35.955333 159.000000 127.288778 35.955333 167.000000 
 127.288778 35.955444 166.000000 127.288778 35.955444 171.000000 
 127.288889 35.955444 163.000000 127.288889 35.955444 171.000000 
 127.288889 35.955556 168.000000 127.288889 35.955556 178.000000 
 127.288889 35.955667 177.000000 127.288889 35.955667 181.000000 
 127.289000 35.955667 174.000000 127.289000 35.955667 181.000000 
 127.289000 35.955778 179.000000 127.289000 35.955778 186.000000 
 127.289000 35.955889 186.000000 127.289000 35.955889 190.000000 
 127.289111 35.955889 184.000000 127.289111 35.955889 189.000000 
 127.289111 35.956000 186.000000 127.289111 35.956000 191.000000 
 127.289111 35.956111 187.000000 127.289111 35.956111 193.000000 
 127.289111 35.956222 187.000000 127.289111 35.956222 195.000000 
 127.289222 35.956222 178.000000 127.289222 35.956222 190.000000 
 127.289222 35.956333 181.000000 127.289222 35.956333 194.000000 
 127.289222 35.956444 189.000000 127.289222 35.956444 207.000000 
 127.289333 35.956444 182.000000 127.289333 35.956444 205.000000 
 127.289333 35.956556 201.000000 127.289333 35.956556 210.000000 
 127.289333 35.956667 207.000000 127.289333 35.956667 223.000000 
 127.289444 35.956667 202.000000 127.289444 35.956667 218.000000 
 127.289444 35.956778 212.000000 127.289444 35.956778 226.000000 
 127.289444 35.956889 219.000000 127.289444 35.956889 232.000000 
 127.289556 35.956889 212.000000 127.289556 35.956889 225.000000 
 127.289556 35.957000 216.000000 127.289556 35.957000 233.000000 
 127.289556 35.957111 225.000000 127.289556 35.957111 244.000000 
 127.289667 35.957111 213.000000 127.289667 35.957111 230.000000 
 127.289667 35.957222 221.000000 127.289667 35.957222 243.000000 
 127.289667 35.957333 231.000000 127.289667 35.957333 245.000000 
 127.289778 35.957444 229.000000 127.289778 35.957444 243.000000 
 127.289778 35.957556 237.000000 127.289778 35.957556 248.000000 
 127.289778 35.957667 241.000000 127.289778 35.957667 251.000000 
 127.289889 35.957667 234.000000 127.289889 35.957667 242.000000 
 127.289889 35.957778 235.000000 127.289889 35.957778 242.000000 
 127.289889 35.957889 235.000000 127.289889 35.957889 241.000000 
 127.290000 35.957889 231.000000 127.290000 35.957889 234.000000 
 127.290000 35.958000 231.000000 127.290000 35.958000 234.000000 
 127.290000 35.958111 231.000000 127.290000 35.958111 236.000000 
 127.290111 35.958111 226.000000 127.290111 35.958111 232.000000 
 127.290111 35.958222 227.000000 127.290111 35.958222 232.000000 
 127.290111 35.958333 228.000000 127.290111 35.958333 234.000000 
 127.290222 35.958333 222.000000 127.290222 35.958333 229.000000 
 127.290222 35.958444 223.000000 127.290222 35.958444 230.000000 
 127.290222 35.958556 224.000000 127.290222 35.958556 231.000000 
 127.290333 35.958556 220.000000 127.290333 35.958556 225.000000 
 127.290333 35.958667 221.000000 127.290333 35.958667 228.000000 
 127.290333 35.958778 223.000000 127.290333 35.958778 230.000000 
 127.290444 35.958889 220.000000 127.290444 35.958889 227.000000 
 127.290444 35.959000 222.000000 127.290444 35.959000 228.000000 
 127.290444 35.959111 223.000000 127.290444 35.959111 228.000000 
 127.290556 35.959111 218.000000 127.290556 35.959111 223.000000 
 127.290556 35.959222 219.000000 127.290556 35.959222 223.000000 
 127.290556 35.959333 219.000000 127.290556 35.959333 224.000000 
 127.290667 35.959333 216.000000 127.290667 35.959333 219.000000 
 127.290667 35.959444 217.000000 127.290667 35.959444 221.000000 
 127.290667 35.959556 218.000000 127.290667 35.959556 225.000000 
 127.290778 35.959556 216.000000 127.290778 35.959556 221.000000 
 127.290778 35.959667 218.000000 127.290778 35.959667 225.000000 
 127.290778 35.959778 221.000000 127.290778 35.959778 229.000000 
 127.290889 35.959778 218.000000 127.290889 35.959778 225.000000 
 127.290889 35.959889 220.000000 127.290889 35.959889 227.000000 
 127.290889 35.960000 222.000000 127.290889 35.960000 230.000000 
 127.291000 35.960000 220.000000 127.291000 35.960000 226.000000 
 127.291000 35.960111 225.000000 127.291000 35.960111 231.000000 
 127.291000 35.960222 231.000000 127.291000 35.960222 239.000000 
 127.291111 35.960333 241.000000 127.291111 35.960333 245.000000 
 127.291111 35.960444 246.000000 127.291111 35.960444 252.000000 
 127.291111 35.960556 253.000000 127.291111 35.960556 260.000000 
 127.291222 35.960556 254.000000 127.291222 35.960556 260.000000 
 127.291222 35.960667 260.000000 127.291222 35.960667 266.000000 
 127.291222 35.960778 264.000000 127.291222 35.960778 274.000000 
 127.291333 35.960778 264.000000 127.291333 35.960778 271.000000 
 127.291333 35.960889 268.000000 127.291333 35.960889 274.000000 
 127.291333 35.961000 271.000000 127.291333 35.961000 278.000000 
 127.291444 35.961000 268.000000 127.291444 35.961000 275.000000 
 127.291444 35.961111 270.000000 127.291444 35.961111 276.000000 
 127.291444 35.961222 272.000000 127.291444 35.961222 279.000000 
 127.291556 35.961222 267.000000 127.291556 35.961222 275.000000 
 127.291556 35.961333 270.000000 127.291556 35.961333 277.000000 
 127.291556 35.961444 273.000000 127.291556 35.961444 280.000000 
 127.291667 35.961444 270.000000 127.291667 35.961444 277.000000 
 127.291667 35.961556 274.000000 127.291667 35.961556 280.000000 
 127.291667 35.961667 279.000000 127.291667 35.961667 287.000000 
 127.291778 35.961778 287.000000 127.291778 35.961778 290.000000 
 127.291778 35.961889 291.000000 127.291778 35.961889 295.000000 
 127.291778 35.962000 295.000000 127.291778 35.962000 299.000000 
 127.291889 35.962000 297.000000 127.291889 35.962000 299.000000 
 127.291889 35.962111 301.000000 127.291889 35.962111 304.000000 
 127.291889 35.962222 306.000000 127.291889 35.962222 311.000000 
 127.292000 35.962222 310.000000 127.292000 35.962222 313.000000 
 127.292000 35.962333 316.000000 127.292000 35.962333 318.000000 
 127.292000 35.962444 322.000000 127.292000 35.962444 329.000000 
 127.292111 35.962444 326.000000 127.292111 35.962444 332.000000 
 127.292111 35.962556 334.000000 127.292111 35.962556 338.000000 
 127.292111 35.962667 339.000000 127.292111 35.962667 349.000000 
 127.292222 35.962667 339.000000 127.292222 35.962667 348.000000 
 127.292222 35.962778 346.000000 127.292222 35.962778 354.000000 
 127.292222 35.962889 350.000000 127.292222 35.962889 359.000000 
 127.292333 35.962889 346.000000 127.292333 35.962889 355.000000 
 127.292333 35.963000 349.000000 127.292333 35.963000 358.000000 
 127.292333 35.963111 351.000000 127.292333 35.963111 365.000000 
 127.292444 35.963111 345.000000 127.292444 35.963111 357.000000 
 127.292444 35.963222 349.000000 127.292444 35.963222 362.000000 
 127.292444 35.963333 356.000000 127.292444 35.963333 369.000000 
 127.292444 35.963444 365.000000 127.292444 35.963444 374.000000 
 127.292556 35.963444 364.000000 127.292556 35.963444 373.000000 
 127.292556 35.963556 373.000000 127.292556 35.963556 384.000000 
 127.292556 35.963667 383.000000 127.292556 35.963667 390.000000 
 127.292667 35.963667 382.000000 127.292667 35.963667 389.000000 
 127.292667 35.963778 387.000000 127.292667 35.963778 395.000000 
 127.292667 35.963889 392.000000 127.292667 35.963889 398.000000 
 127.292778 35.963889 389.000000 127.292778 35.963889 392.000000 
 127.292778 35.964000 388.000000 127.292778 35.964000 392.000000 
 127.292778 35.964111 387.000000 127.292778 35.964111 390.000000 
 127.292889 35.964111 382.000000 127.292889 35.964111 386.000000 
 127.292889 35.964222 380.000000 127.292889 35.964222 384.000000 
 127.292889 35.964333 377.000000 127.292889 35.964333 378.000000 
 127.293000 35.964333 368.000000 127.293000 35.964333 371.000000 
 127.293000 35.964444 359.000000 127.293000 35.964444 364.000000 
 127.293000 35.964556 353.000000 127.293000 35.964556 355.000000 
 127.293111 35.964667 339.000000 127.293111 35.964667 344.000000 
 127.293111 35.964778 337.000000 127.293111 35.964778 343.000000 
 127.293111 35.964889 335.000000 127.293111 35.964889 343.000000 
 127.293222 35.964889 329.000000 127.293222 35.964889 334.000000 
 127.293222 35.965000 328.000000 127.293222 35.965000 335.000000 
 127.293222 35.965111 332.000000 127.293222 35.965111 338.000000 
 127.293333 35.965111 331.000000 127.293333 35.965111 338.000000 
 127.293333 35.965222 339.000000 127.293333 35.965222 353.000000 
 127.293333 35.965333 355.000000 127.293333 35.965333 362.000000 
 127.293444 35.965333 357.000000 127.293444 35.965333 363.000000 
 127.293444 35.965444 365.000000 127.293444 35.965444 377.000000 
 127.293444 35.965556 380.000000 127.293444 35.965556 387.000000 
 127.293556 35.965556 381.000000 127.293556 35.965556 388.000000 
 127.293556 35.965667 390.000000 127.293556 35.965667 396.000000 
 127.293556 35.965778 397.000000 127.293556 35.965778 409.000000 
 127.293667 35.965778 398.000000 127.293667 35.965778 410.000000 
 127.293667 35.965889 410.000000 127.293667 35.965889 416.000000 
 127.293667 35.966000 416.000000 127.293667 35.966000 426.000000 
 127.293778 35.966111 426.000000 127.293778 35.966111 433.000000 
 127.293778 35.966222 430.000000 127.293778 35.966222 440.000000 
 127.293778 35.966333 433.000000 127.293778 35.966333 442.000000 
 127.293889 35.966333 426.000000 127.293889 35.966333 434.000000 
 127.293889 35.966444 427.000000 127.293889 35.966444 436.000000 
 127.293889 35.966556 428.000000 127.293889 35.966556 438.000000 
 127.294000 35.966556 420.000000 127.294000 35.966556 432.000000 
 127.294000 35.966667 427.000000 127.294000 35.966667 442.000000 
 127.294000 35.966778 440.000000 127.294000 35.966778 449.000000 
 127.294111 35.966778 438.000000 127.294111 35.966778 447.000000 
 127.294111 35.966889 445.000000 127.294111 35.966889 459.000000 
 127.294111 35.967000 455.000000 127.294111 35.967000 463.000000 
 127.294222 35.967000 449.000000 127.294222 35.967000 459.000000 
 127.294222 35.967111 453.000000 127.294222 35.967111 464.000000 
 127.294222 35.967222 458.000000 127.294222 35.967222 466.000000 
 127.294333 35.967222 452.000000 127.294333 35.967222 462.000000 
 127.294333 35.967333 457.000000 127.294333 35.967333 465.000000 
 127.294333 35.967444 463.000000 127.294333 35.967444 463.000000 
 127.294444 35.967444 458.000000 127.294444 35.967444 461.000000 
 127.294444 35.967556 459.000000 127.294444 35.967556 454.000000 
 127.294444 35.967667 452.000000 127.294444 35.967667 440.000000 
 127.294444 35.967778 439.000000 127.294444 35.967778 432.000000 
 127.294556 35.967778 437.000000 127.294556 35.967778 431.000000 
 127.294556 35.967889 429.000000 127.294556 35.967889 418.000000 
 127.294556 35.968000 417.000000 127.294556 35.968000 410.000000 
 127.294667 35.968000 414.000000 127.294667 35.968000 408.000000 
 127.294667 35.968111 406.000000 127.294667 35.968111 395.000000 
 127.294667 35.968222 393.000000 127.294667 35.968222 387.000000 
 127.294778 35.968222 392.000000 127.294778 35.968222 386.000000 
 127.294778 35.968333 386.000000 127.294778 35.968333 376.000000 
 127.294778 35.968444 376.000000 127.294778 35.968444 369.000000 
 127.294889 35.968444 377.000000 127.294889 35.968444 369.000000 
 127.294889 35.968556 369.000000 127.294889 35.968556 364.000000 
 127.294889 35.968667 363.000000 127.294889 35.968667 362.000000 
 127.295000 35.968667 362.000000 127.295000 35.968667 360.000000 
 127.295000 35.968778 359.000000 127.295000 35.968778 356.000000 
 127.295000 35.968889 354.000000 127.295000 35.968889 352.000000 
 127.295111 35.968889 353.000000 127.295111 35.968889 349.000000 
 127.295111 35.969000 348.000000 127.295111 35.969000 345.000000 
 127.295111 35.969111 343.000000 127.295111 35.969111 343.000000 
 127.295111 35.969222 341.000000 127.295111 35.969222 341.000000 
 127.295222 35.969222 340.000000 127.295222 35.969222 339.000000 
 127.295222 35.969333 338.000000 127.295222 35.969333 337.000000 
 127.295222 35.969444 335.000000 127.295222 35.969444 335.000000 
 127.295333 35.969444 336.000000 127.295333 35.969444 334.000000 
 127.295333 35.969556 334.000000 127.295333 35.969556 331.000000 
 127.295333 35.969667 331.000000 127.295333 35.969667 329.000000 
 127.295444 35.969667 334.000000 127.295444 35.969667 329.000000 
 127.295444 35.969778 332.000000 127.295444 35.969778 324.000000 
 127.295444 35.969889 326.000000 127.295444 35.969889 320.000000 
 127.295556 35.969889 331.000000 127.295556 35.969889 320.000000 
 127.295556 35.970000 326.000000 127.295556 35.970000 316.000000 
 127.295556 35.970111 315.000000 127.295556 35.970111 313.000000 
 127.295667 35.970111 318.000000 127.295667 35.970111 312.000000 
 127.295667 35.970222 313.000000 127.295667 35.970222 308.000000 
 127.295667 35.970333 308.000000 127.295667 35.970333 306.000000 
 127.295778 35.970333 312.000000 127.295778 35.970333 305.000000 
 127.295778 35.970444 308.000000 127.295778 35.970444 300.000000 
 127.295778 35.970556 301.000000 127.295778 35.970556 298.000000 
 127.295778 35.970667 298.000000 127.295778 35.970667 295.000000 
 127.295889 35.970667 300.000000 127.295889 35.970667 296.000000 
 127.295889 35.970778 297.000000 127.295889 35.970778 293.000000 
 127.295889 35.970889 295.000000 127.295889 35.970889 291.000000 
 127.296000 35.970889 301.000000 127.296000 35.970889 295.000000 
 127.296000 35.971000 305.000000 127.296000 35.971000 300.000000 
 127.296000 35.971111 306.000000 127.296000 35.971111 301.000000 
 127.296111 35.971111 309.000000 127.296111 35.971111 306.000000 
 127.296111 35.971222 310.000000 127.296111 35.971222 304.000000 
 127.296111 35.971333 309.000000 127.296111 35.971333 300.000000 
 127.296222 35.971333 309.000000 127.296222 35.971333 305.000000 
 127.296222 35.971444 307.000000 127.296222 35.971444 299.000000 
 127.296222 35.971556 305.000000 127.296222 35.971556 295.000000 
 127.296333 35.971556 305.000000 127.296333 35.971556 300.000000 
 127.296333 35.971667 305.000000 127.296333 35.971667 295.000000 
 127.296333 35.971778 303.000000 127.296333 35.971778 293.000000 
 127.296444 35.971778 305.000000 127.296444 35.971778 300.000000 
 127.296444 35.971889 305.000000 127.296444 35.971889 298.000000 
 127.296444 35.972000 305.000000 127.296444 35.972000 292.000000 
 127.296444 35.972111 305.000000 127.296444 35.972111 288.000000 
 127.296556 35.972111 305.000000 127.296556 35.972111 298.000000 
 127.296556 35.972222 305.000000 127.296556 35.972222 296.000000 
 127.296556 35.972333 305.000000 127.296556 35.972333 291.000000 
 127.296667 35.972333 301.000000 127.296667 35.972333 299.000000 
 127.296667 35.972444 300.000000 127.296667 35.972444 296.000000 
 127.296667 35.972556 300.000000 127.296667 35.972556 288.000000 
 127.296778 35.972556 300.000000 127.296778 35.972556 294.000000 
 127.296778 35.972667 299.000000 127.296778 35.972667 286.000000 
 127.296778 35.972778 292.000000 127.296778 35.972778 278.000000 
 127.296889 35.972778 296.000000 127.296889 35.972778 284.000000 
 127.296889 35.972889 292.000000 127.296889 35.972889 272.000000 
 127.296889 35.973000 280.000000 127.296889 35.973000 264.000000 
 127.297000 35.973000 288.000000 127.297000 35.973000 273.000000 
 127.297000 35.973111 282.000000 127.297000 35.973111 263.000000 
 127.297000 35.973222 273.000000 127.297000 35.973222 257.000000 
 127.297111 35.973222 282.000000 127.297111 35.973222 268.000000 
 127.297111 35.973333 277.000000 127.297111 35.973333 259.000000 
 127.297111 35.973444 271.000000 127.297111 35.973444 254.000000 
 127.297111 35.973556 265.000000 127.297111 35.973556 248.000000 
 127.297222 35.973556 277.000000 127.297222 35.973556 258.000000 
 127.297222 35.973667 271.000000 127.297222 35.973667 253.000000 
 127.297222 35.973778 265.000000 127.297222 35.973778 250.000000 
 127.297333 35.973778 274.000000 127.297333 35.973778 258.000000 
 127.297333 35.973889 267.000000 127.297333 35.973889 255.000000 
 127.297333 35.974000 262.000000 127.297333 35.974000 250.000000 
 127.297444 35.974000 269.000000 127.297444 35.974000 257.000000 
 127.297444 35.974111 264.000000 127.297444 35.974111 254.000000 
 127.297444 35.974222 261.000000 127.297444 35.974222 248.000000 
 127.297556 35.974222 268.000000 127.297556 35.974222 259.000000 
 127.297556 35.974333 265.000000 127.297556 35.974333 256.000000 
 127.297556 35.974444 264.000000 127.297556 35.974444 254.000000 
 127.297667 35.974444 275.000000 127.297667 35.974444 264.000000 
 127.297667 35.974556 275.000000 127.297667 35.974556 264.000000 
 127.297667 35.974667 275.000000 127.297667 35.974667 264.000000 
 127.297778 35.974778 280.000000 127.297778 35.974778 274.000000 
 127.297778 35.974889 276.000000 127.297778 35.974889 272.000000 
 127.297778 35.975000 271.000000 127.297778 35.975000 270.000000 
 127.297889 35.975000 266.000000 127.297889 35.975000 267.000000 
 127.297889 35.975111 259.000000 127.297889 35.975111 265.000000 
 127.297889 35.975222 256.000000 127.297889 35.975222 261.000000 
 127.298000 35.975222 250.000000 127.298000 35.975222 253.000000 
 127.298000 35.975333 247.000000 127.298000 35.975333 253.000000 
 127.298000 35.975444 247.000000 127.298000 35.975444 252.000000 
 127.298111 35.975444 241.000000 127.298111 35.975444 248.000000 
 127.298111 35.975556 244.000000 127.298111 35.975556 245.000000 
 127.298111 35.975667 245.000000 127.298111 35.975667 233.000000 
 127.298222 35.975667 241.000000 127.298222 35.975667 235.000000 
 127.298222 35.975778 238.000000 127.298222 35.975778 227.000000 
 127.298222 35.975889 230.000000 127.298222 35.975889 210.000000 
 127.298333 35.975889 234.000000 127.298333 35.975889 216.000000 
 127.298333 35.976000 219.000000 127.298333 35.976000 205.000000 
 127.298333 35.976111 210.000000 127.298333 35.976111 193.000000 
 127.298333 35.976222 198.000000 127.298333 35.976222 186.000000 
 127.298444 35.976222 206.000000 127.298444 35.976222 192.000000 
 127.298444 35.976333 199.000000 127.298444 35.976333 184.000000 
 127.298444 35.976444 193.000000 127.298444 35.976444 174.000000 
 127.298556 35.976444 202.000000 127.298556 35.976444 181.000000 
 127.298556 35.976556 192.000000 127.298556 35.976556 174.000000 
 127.298556 35.976667 184.000000 127.298556 35.976667 165.000000 
 127.298667 35.976667 197.000000 127.298667 35.976667 175.000000 
 127.298667 35.976778 183.000000 127.298667 35.976778 164.000000 
 127.298667 35.976889 176.000000 127.298667 35.976889 150.000000 
 127.298778 35.976889 180.000000 127.298778 35.976889 156.000000 
 127.298778 35.977000 163.000000 127.298778 35.977000 144.000000 
 127.298778 35.977111 151.000000 127.298778 35.977111 126.000000 
 127.298889 35.977111 154.000000 127.298889 35.977111 128.000000 
 127.298889 35.977222 129.000000 127.298889 35.977222 124.000000 
 127.298889 35.977333 124.000000 127.298889 35.977333 123.000000 
 127.299000 35.977333 125.000000 127.299000 35.977333 123.000000 
 127.299000 35.977444 123.000000 127.299000 35.977444 122.000000 
 127.299000 35.977556 122.000000 127.299000 35.977556 121.000000 
 127.299000 35.977667 121.000000 127.299000 35.977667 120.000000 
 127.299111 35.977667 120.000000 127.299111 35.977667 120.000000 
 127.299111 35.977778 120.000000 127.299111 35.977778 119.000000 
 127.299111 35.977889 120.000000 127.299111 35.977889 120.000000 
 127.299222 35.977889 120.000000 127.299222 35.977889 120.000000 
 127.299222 35.978000 120.000000 127.299222 35.978000 120.000000 
 127.299222 35.978111 120.000000 127.299222 35.978111 120.000000 
 127.299333 35.978111 120.000000 127.299333 35.978111 120.000000 
 127.299333 35.978222 120.000000 127.299333 35.978222 120.000000 
 127.299333 35.978333 120.000000 127.299333 35.978333 121.000000 
 127.299444 35.978333 120.000000 127.299444 35.978333 121.000000 
 127.299444 35.978444 120.000000 127.299444 35.978444 121.000000 
 127.299444 35.978556 121.000000 127.299444 35.978556 122.000000 
 127.299556 35.978556 120.000000 127.299556 35.978556 121.000000 
 127.299556 35.978667 121.000000 127.299556 35.978667 121.000000 
 127.299556 35.978778 121.000000 127.299556 35.978778 122.000000 
 127.299667 35.978889 121.000000 127.299667 35.978889 122.000000 
 127.299667 35.979000 121.000000 127.299667 35.979000 122.000000 
 127.299667 35.979111 122.000000 127.299667 35.979111 122.000000 
 127.299778 35.979111 121.000000 127.299778 35.979111 122.000000 
 127.299778 35.979222 122.000000 127.299778 35.979222 123.000000 
 127.299778 35.979333 122.000000 127.299778 35.979333 123.000000 
 127.299889 35.979333 122.000000 127.299889 35.979333 123.000000 
 127.299889 35.979444 123.000000 127.299889 35.979444 124.000000 
 127.299889 35.979556 123.000000 127.299889 35.979556 124.000000 
 127.300000 35.979556 123.000000 127.300000 35.979556 124.000000 
 127.300000 35.979667 124.000000 127.300000 35.979667 124.000000 
 127.300000 35.979778 124.000000 127.300000 35.979778 125.000000 
 127.300111 35.979778 124.000000 127.300111 35.979778 125.000000 
 127.300111 35.979889 124.000000 127.300111 35.979889 127.000000 
 127.300111 35.980000 127.000000 127.300111 35.980000 130.000000 
 127.300222 35.980000 126.000000 127.300222 35.980000 131.000000 
 127.300222 35.980111 132.000000 127.300222 35.980111 137.000000 
 127.300222 35.980222 137.000000 127.300222 35.980222 145.000000 
 127.300222 35.980333 144.000000 127.300222 35.980333 151.000000 
 127.300333 35.980333 142.000000 127.300333 35.980333 150.000000 
 127.300333 35.980444 147.000000 127.300333 35.980444 158.000000 
 127.300333 35.980556 156.000000 127.300333 35.980556 162.000000 
 127.300444 35.980556 154.000000 127.300444 35.980556 161.000000 
 127.300444 35.980667 159.000000 127.300444 35.980667 169.000000 
 127.300444 35.980778 166.000000 127.300444 35.980778 175.000000 
 127.300556 35.980778 164.000000 127.300556 35.980778 173.000000 
 127.300556 35.980889 169.000000 127.300556 35.980889 182.000000 
 127.300556 35.981000 179.000000 127.300556 35.981000 188.000000 
 127.300667 35.981000 174.000000 127.300667 35.981000 185.000000 
 127.300667 35.981111 181.000000 127.300667 35.981111 198.000000 
 127.300667 35.981222 192.000000 127.300667 35.981222 204.000000 
 127.300778 35.981222 188.000000 127.300778 35.981222 200.000000 
 127.300778 35.981333 195.000000 127.300778 35.981333 209.000000 
 127.300778 35.981444 206.000000 127.300778 35.981444 216.000000 
 127.300889 35.981444 206.000000 127.300889 35.981444 214.000000 
 127.300889 35.981556 216.000000 127.300889 35.981556 224.000000 
 127.300889 35.981667 225.000000 127.300889 35.981667 233.000000 
 127.300889 35.981778 234.000000 127.300889 35.981778 238.000000 
 127.301000 35.981778 236.000000 127.301000 35.981778 239.000000 
 127.301000 35.981889 240.000000 127.301000 35.981889 248.000000 
 127.301000 35.982000 249.000000 127.301000 35.982000 256.000000 
 127.301111 35.982000 252.000000 127.301111 35.982000 257.000000 
 127.301111 35.982111 260.000000 127.301111 35.982111 267.000000 
 127.301111 35.982222 267.000000 127.301111 35.982222 275.000000 
 127.301222 35.982222 265.000000 127.301222 35.982222 273.000000 
 127.301222 35.982333 269.000000 127.301222 35.982333 278.000000 
 127.301222 35.982444 273.000000 127.301222 35.982444 279.000000 
 127.301333 35.982444 267.000000 127.301333 35.982444 274.000000 
 127.301333 35.982556 266.000000 127.301333 35.982556 271.000000 
 127.301333 35.982667 259.000000 127.301333 35.982667 265.000000 
 127.301444 35.982667 250.000000 127.301444 35.982667 255.000000 
 127.301444 35.982778 246.000000 127.301444 35.982778 249.000000 
 127.301444 35.982889 242.000000 127.301444 35.982889 246.000000 
 127.301444 35.983000 238.000000 127.301444 35.983000 242.000000 
 127.301556 35.983000 231.000000 127.301556 35.983000 235.000000 
 127.301556 35.983111 227.000000 127.301556 35.983111 235.000000 
 127.301556 35.983222 227.000000 127.301556 35.983222 236.000000 
 127.301667 35.983222 219.000000 127.301667 35.983222 231.000000 
 127.301667 35.983333 224.000000 127.301667 35.983333 236.000000 
 127.301667 35.983444 232.000000 127.301667 35.983444 246.000000 
 127.301778 35.983444 224.000000 127.301778 35.983444 240.000000 
 127.301778 35.983556 233.000000 127.301778 35.983556 247.000000 
 127.301778 35.983667 234.000000 127.301778 35.983667 243.000000 
 127.301889 35.983667 221.000000 127.301889 35.983667 228.000000 
 127.301889 35.983778 217.000000 127.301889 35.983778 224.000000 
 127.301889 35.983889 214.000000 127.301889 35.983889 224.000000 
 127.302000 35.983889 203.000000 127.302000 35.983889 212.000000 
 127.302000 35.984000 201.000000 127.302000 35.984000 209.000000 
 127.302000 35.984111 200.000000 127.302000 35.984111 209.000000 
 127.302111 35.984222 192.000000 127.302111 35.984222 200.000000 
 127.302111 35.984333 192.000000 127.302111 35.984333 199.000000 
 127.302111 35.984444 192.000000 127.302111 35.984444 198.000000 
 127.302222 35.984444 185.000000 127.302222 35.984444 192.000000 
 127.302222 35.984556 185.000000 127.302222 35.984556 191.000000 
 127.302222 35.984667 185.000000 127.302222 35.984667 191.000000 
 127.302333 35.984667 183.000000 127.302333 35.984667 187.000000 
 127.302333 35.984778 187.000000 127.302333 35.984778 190.000000 
 127.302333 35.984889 191.000000 127.302333 35.984889 196.000000 
 127.302444 35.984889 193.000000 127.302444 35.984889 199.000000 
 127.302444 35.985000 203.000000 127.302444 35.985000 205.000000 
 127.302444 35.985111 210.000000 127.302444 35.985111 211.000000 
 127.302556 35.985111 216.000000 127.302556 35.985111 216.000000 
 127.302556 35.985222 223.000000 127.302556 35.985222 223.000000 
 127.302556 35.985333 228.000000 127.302556 35.985333 227.000000 
 127.302667 35.985333 233.000000 127.302667 35.985333 232.000000 
 127.302667 35.985444 237.000000 127.302667 35.985444 237.000000 
 127.302667 35.985556 242.000000 127.302667 35.985556 242.000000 
 127.302667 35.985667 247.000000 127.302667 35.985667 249.000000 
 127.302778 35.985667 251.000000 127.302778 35.985667 255.000000 
 127.302778 35.985778 261.000000 127.302778 35.985778 263.000000 
 127.302778 35.985889 267.000000 127.302778 35.985889 275.000000 
 127.302889 35.985889 270.000000 127.302889 35.985889 277.000000 
 127.302889 35.986000 279.000000 127.302889 35.986000 285.000000 
 127.302889 35.986111 287.000000 127.302889 35.986111 296.000000 
 127.303000 35.986111 289.000000 127.303000 35.986111 300.000000 
 127.303000 35.986222 301.000000 127.303000 35.986222 306.000000 
 127.303000 35.986333 308.000000 127.303000 35.986333 316.000000 
 127.303111 35.986333 309.000000 127.303111 35.986333 318.000000 
 127.303111 35.986444 319.000000 127.303111 35.986444 325.000000 
 127.303111 35.986556 325.000000 127.303111 35.986556 335.000000 
 127.303222 35.986556 326.000000 127.303222 35.986556 336.000000 
 127.303222 35.986667 336.000000 127.303222 35.986667 342.000000 
 127.303222 35.986778 343.000000 127.303222 35.986778 353.000000 
 127.303222 35.986889 354.000000 127.303222 35.986889 358.000000 
 127.303333 35.986889 355.000000 127.303333 35.986889 359.000000 
 127.303333 35.987000 362.000000 127.303333 35.987000 365.000000 
 127.303333 35.987111 365.000000 127.303333 35.987111 365.000000 
 127.303444 35.987111 365.000000 127.303444 35.987111 365.000000 
 127.303444 35.987222 365.000000 127.303444 35.987222 365.000000 
 127.303444 35.987333 363.000000 127.303444 35.987333 365.000000 
 127.303556 35.987333 358.000000 127.303556 35.987333 360.000000 
 127.303556 35.987444 353.000000 127.303556 35.987444 358.000000 
 127.303556 35.987556 351.000000 127.303556 35.987556 357.000000 
 127.303667 35.987556 341.000000 127.303667 35.987556 350.000000 
 127.303667 35.987667 339.000000 127.303667 35.987667 350.000000 
 127.303667 35.987778 338.000000 127.303667 35.987778 348.000000 
 127.303778 35.987778 329.000000 127.303778 35.987778 337.000000 
 127.303778 35.987889 329.000000 127.303778 35.987889 336.000000 
 127.303778 35.988000 327.000000 127.303778 35.988000 331.000000 
 127.303889 35.988000 317.000000 127.303889 35.988000 322.000000 
 127.303889 35.988111 311.000000 127.303889 35.988111 317.000000 
 127.303889 35.988222 308.000000 127.303889 35.988222 312.000000 
 127.303889 35.988333 304.000000 127.303889 35.988333 309.000000 
 127.304000 35.988333 294.000000 127.304000 35.988333 301.000000 
 127.304000 35.988444 292.000000 127.304000 35.988444 297.000000 
 127.304000 35.988556 288.000000 127.304000 35.988556 294.000000 
 127.304111 35.988556 279.000000 127.304111 35.988556 284.000000 
 127.304111 35.988667 276.000000 127.304111 35.988667 281.000000 
 127.304111 35.988778 273.000000 127.304111 35.988778 275.000000 
 127.304222 35.988778 264.000000 127.304222 35.988778 265.000000 
 127.304222 35.988889 258.000000 127.304222 35.988889 261.000000 
 127.304222 35.989000 253.000000 127.304222 35.989000 252.000000 
 127.304333 35.989000 245.000000 127.304333 35.989000 245.000000 
 127.304333 35.989111 237.000000 127.304333 35.989111 240.000000 
 127.304333 35.989222 233.000000 127.304333 35.989222 233.000000 
 127.304444 35.989222 225.000000 127.304444 35.989222 225.000000 
 127.304444 35.989333 218.000000 127.304444 35.989333 220.000000 
 127.304444 35.989444 213.000000 127.304444 35.989444 214.000000 
 127.304444 35.989556 209.000000 127.304444 35.989556 210.000000 
 127.304556 35.989556 205.000000 127.304556 35.989556 208.000000 
 127.304556 35.989667 207.000000 127.304556 35.989667 210.000000 
 127.304556 35.989778 213.000000 127.304556 35.989778 216.000000 
 127.304667 35.989778 215.000000 127.304667 35.989778 219.000000 
 127.304667 35.989889 222.000000 127.304667 35.989889 229.000000 
 127.304667 35.990000 232.000000 127.304667 35.990000 234.000000 
 127.304778 35.990000 235.000000 127.304778 35.990000 237.000000 
 127.304778 35.990111 240.000000 127.304778 35.990111 245.000000 
 127.304778 35.990222 249.000000 127.304778 35.990222 251.000000 
 127.304889 35.990222 253.000000 127.304889 35.990222 255.000000 
 127.304889 35.990333 260.000000 127.304889 35.990333 261.000000 
 127.304889 35.990444 269.000000 127.304889 35.990444 271.000000 
 127.305000 35.990444 273.000000 127.305000 35.990444 277.000000 
 127.305000 35.990556 281.000000 127.305000 35.990556 283.000000 
 127.305000 35.990667 288.000000 127.305000 35.990667 292.000000 
 127.305000 35.990778 298.000000 127.305000 35.990778 298.000000 
 127.305111 35.990778 303.000000 127.305111 35.990778 303.000000 
 127.305111 35.990889 308.000000 127.305111 35.990889 311.000000 
 127.305111 35.991000 316.000000 127.305111 35.991000 317.000000 
 127.305222 35.991000 321.000000 127.305222 35.991000 322.000000 
 127.305222 35.991111 327.000000 127.305222 35.991111 329.000000 
 127.305222 35.991222 333.000000 127.305222 35.991222 334.000000 
 127.305333 35.991222 335.000000 127.305333 35.991222 337.000000 
 127.305333 35.991333 336.000000 127.305333 35.991333 340.000000 
 127.305333 35.991444 339.000000 127.305333 35.991444 342.000000 
 127.305444 35.991444 334.000000 127.305444 35.991444 340.000000 
 127.305444 35.991556 336.000000 127.305444 35.991556 345.000000 
 127.305444 35.991667 341.000000 127.305444 35.991667 346.000000 
 127.305556 35.991667 334.000000 127.305556 35.991667 344.000000 
 127.305556 35.991778 340.000000 127.305556 35.991778 350.000000 
 127.305556 35.991889 344.000000 127.305556 35.991889 351.000000 
 127.305667 35.991889 341.000000 127.305667 35.991889 347.000000 
 127.305667 35.992000 343.000000 127.305667 35.992000 350.000000 
 127.305667 35.992111 347.000000 127.305667 35.992111 351.000000 
 127.305667 35.992222 351.000000 127.305667 35.992222 353.000000 
 127.305778 35.992222 350.000000 127.305778 35.992222 354.000000 
 127.305778 35.992333 354.000000 127.305778 35.992333 360.000000 
 127.305778 35.992444 362.000000 127.305778 35.992444 361.000000 
 127.305889 35.992444 363.000000 127.305889 35.992444 365.000000 
 127.305889 35.992556 368.000000 127.305889 35.992556 366.000000 
 127.305889 35.992667 371.000000 127.305889 35.992667 365.000000 
 127.306000 35.992667 376.000000 127.306000 35.992667 371.000000 
 127.306000 35.992778 378.000000 127.306000 35.992778 372.000000 
 127.306000 35.992889 379.000000 127.306000 35.992889 372.000000 
 127.306111 35.992889 386.000000 127.306111 35.992889 379.000000 
 127.306111 35.993000 385.000000 127.306111 35.993000 378.000000 
 127.306111 35.993111 385.000000 127.306111 35.993111 377.000000 
 127.306222 35.993111 391.000000 127.306222 35.993111 385.000000 
 127.306222 35.993222 391.000000 127.306222 35.993222 384.000000 
 127.306222 35.993333 392.000000 127.306222 35.993333 385.000000 
 127.306222 35.993444 393.000000 127.306222 35.993444 388.000000 
 127.306333 35.993444 405.000000 127.306333 35.993444 397.000000 
 127.306333 35.993556 412.000000 127.306333 35.993556 399.000000 
 127.306333 35.993667 419.000000 127.306333 35.993667 406.000000 
 127.306444 35.993667 433.000000 127.306444 35.993667 425.000000 
 127.306444 35.993778 438.000000 127.306444 35.993778 426.000000 
 127.306444 35.993889 439.000000 127.306444 35.993889 428.000000 
 127.306556 35.993889 452.000000 127.306556 35.993889 440.000000 
 127.306556 35.994000 453.000000 127.306556 35.994000 442.000000 
 127.306556 35.994111 452.000000 127.306556 35.994111 442.000000 
 127.306667 35.994111 461.000000 127.306667 35.994111 452.000000 
 127.306667 35.994222 461.000000 127.306667 35.994222 453.000000 
 127.306667 35.994333 463.000000 127.306667 35.994333 457.000000 
 127.306778 35.994333 474.000000 127.306778 35.994333 465.000000 
 127.306778 35.994444 476.000000 127.306778 35.994444 468.000000 
 127.306778 35.994556 476.000000 127.306778 35.994556 470.000000 
 127.306778 35.994667 476.000000 127.306778 35.994667 479.000000 
 127.306889 35.994667 483.000000 127.306889 35.994667 480.000000 
 127.306889 35.994778 484.000000 127.306889 35.994778 484.000000 
 127.306889 35.994889 486.000000 127.306889 35.994889 491.000000 
 127.307000 35.994889 492.000000 127.307000 35.994889 492.000000 
 127.307000 35.995000 496.000000 127.307000 35.995000 497.000000 
 127.307000 35.995111 500.000000 127.307000 35.995111 507.000000 
 127.307111 35.995111 505.000000 127.307111 35.995111 508.000000 
 127.307111 35.995222 511.000000 127.307111 35.995222 515.000000 
 127.307111 35.995333 517.000000 127.307111 35.995333 526.000000 
 127.307222 35.995333 521.000000 127.307222 35.995333 528.000000 
 127.307222 35.995444 531.000000 127.307222 35.995444 535.000000 
 127.307222 35.995556 537.000000 127.307222 35.995556 545.000000 
 127.307333 35.995556 540.000000 127.307333 35.995556 548.000000 
 127.307333 35.995667 551.000000 127.307333 35.995667 554.000000 
 127.307333 35.995778 558.000000 127.307333 35.995778 562.000000 
 127.307444 35.995778 561.000000 127.307444 35.995778 565.000000 
 127.307444 35.995889 568.000000 127.307444 35.995889 576.000000 
 127.307444 35.996000 578.000000 127.307444 35.996000 580.000000 
 127.307444 35.996111 581.000000 127.307444 35.996111 584.000000 
 127.307556 35.996111 583.000000 127.307556 35.996111 586.000000 
 127.307556 35.996222 586.000000 127.307556 35.996222 591.000000 
 127.307556 35.996333 588.000000 127.307556 35.996333 595.000000 
 127.307667 35.996333 582.000000 127.307667 35.996333 589.000000 
 127.307667 35.996444 581.000000 127.307667 35.996444 588.000000 
 127.307667 35.996556 581.000000 127.307667 35.996556 585.000000 
 127.307778 35.996556 575.000000 127.307778 35.996556 580.000000 
 127.307778 35.996667 576.000000 127.307778 35.996667 576.000000 
 127.307778 35.996778 572.000000 127.307778 35.996778 565.000000 
 127.307889 35.996778 563.000000 127.307889 35.996778 559.000000 
 127.307889 35.996889 553.000000 127.307889 35.996889 551.000000 
 127.307889 35.997000 544.000000 127.307889 35.997000 546.000000 
 127.308000 35.997000 537.000000 127.308000 35.997000 539.000000 
 127.308000 35.997111 534.000000 127.308000 35.997111 540.000000 
 127.308000 35.997222 534.000000 127.308000 35.997222 541.000000 
 127.308000 35.997333 536.000000 127.308000 35.997333 544.000000 
 127.308111 35.997333 529.000000 127.308111 35.997333 539.000000 
 127.308111 35.997444 533.000000 127.308111 35.997444 545.000000 
 127.308111 35.997556 538.000000 127.308111 35.997556 552.000000 
 127.308222 35.997556 534.000000 127.308222 35.997556 545.000000 
 127.308222 35.997667 540.000000 127.308222 35.997667 550.000000 
 127.308222 35.997778 547.000000 127.308222 35.997778 556.000000 
 127.308333 35.997778 544.000000 127.308333 35.997778 555.000000 
 127.308333 35.997889 551.000000 127.308333 35.997889 557.000000 
 127.308333 35.998000 553.000000 127.308333 35.998000 555.000000 
 127.308444 35.998000 546.000000 127.308444 35.998000 555.000000 
 127.308444 35.998111 551.000000 127.308444 35.998111 555.000000 
 127.308444 35.998222 555.000000 127.308444 35.998222 554.000000 
 127.308556 35.998222 556.000000 127.308556 35.998222 557.000000 
 127.308556 35.998333 560.000000 127.308556 35.998333 558.000000 
 127.308556 35.998444 562.000000 127.308556 35.998444 558.000000 
 127.308556 35.998556 563.000000 127.308556 35.998556 557.000000 
 127.308667 35.998556 565.000000 127.308667 35.998556 563.000000 
 127.308667 35.998667 567.000000 127.308667 35.998667 561.000000 
 127.308667 35.998778 567.000000 127.308667 35.998778 561.000000 
 127.308778 35.998778 571.000000 127.308778 35.998778 567.000000 
 127.308778 35.998889 573.000000 127.308778 35.998889 568.000000 
 127.308778 35.999000 574.000000 127.308778 35.999000 570.000000 
 127.308889 35.999000 582.000000 127.308889 35.999000 576.000000 
 127.308889 35.999111 583.000000 127.308889 35.999111 582.000000 
 127.308889 35.999222 586.000000 127.308889 35.999222 587.000000 
 127.309000 35.999222 592.000000 127.309000 35.999222 590.000000 
 127.309000 35.999333 595.000000 127.309000 35.999333 594.000000 
 127.309000 35.999444 595.000000 127.309000 35.999444 587.000000 
 127.309111 35.999444 591.000000 127.309111 35.999444 582.000000 
 127.309111 35.999556 578.000000 127.309111 35.999556 572.000000 
 127.309111 35.999667 568.000000 127.309111 35.999667 548.000000 
 127.309111 35.999778 551.000000 127.309111 35.999778 539.000000 
 127.309222 35.999778 557.000000 127.309222 35.999778 542.000000 
 127.309222 35.999889 546.000000 127.309222 35.999889 527.000000 
 127.309222 36.000000 530.000000 127.309222 36.000000 520.000000 
 127.309333 36.000000 535.000000 127.309333 36.000000 522.000000 
 127.309333 36.000111 525.000000 127.309333 36.000111 512.000000 
 127.309333 36.000222 515.000000 127.309333 36.000222 506.000000 
 127.309444 36.000222 518.000000 127.309444 36.000222 509.000000 
 127.309444 36.000333 512.000000 127.309444 36.000333 499.000000 
 127.309444 36.000444 503.000000 127.309444 36.000444 491.000000 
 127.309556 36.000444 507.000000 127.309556 36.000444 496.000000 
 127.309556 36.000556 501.000000 127.309556 36.000556 485.000000 
 127.309556 36.000667 491.000000 127.309556 36.000667 479.000000 
 127.309667 36.000667 496.000000 127.309667 36.000667 485.000000 
 127.309667 36.000778 489.000000 127.309667 36.000778 475.000000 
 127.309667 36.000889 478.000000 127.309667 36.000889 467.000000 
 127.309667 36.001000 470.000000 127.309667 36.001000 459.000000 
 127.309778 36.001000 470.000000 127.309778 36.001000 462.000000 
 127.309778 36.001111 462.000000 127.309778 36.001111 449.000000 
 127.309778 36.001222 450.000000 127.309778 36.001222 442.000000 
 127.309889 36.001222 447.000000 127.309889 36.001222 442.000000 
 127.309889 36.001333 440.000000 127.309889 36.001333 431.000000 
 127.309889 36.001444 428.000000 127.309889 36.001444 424.000000 
 127.310000 36.001444 424.000000 127.310000 36.001444 422.000000 
 127.310000 36.001556 419.000000 127.310000 36.001556 414.000000 
 127.310000 36.001667 411.000000 127.310000 36.001667 408.000000 
 127.310111 36.001667 409.000000 127.310111 36.001667 406.000000 
 127.310111 36.001778 404.000000 127.310111 36.001778 399.000000 
 127.310111 36.001889 397.000000 127.310111 36.001889 394.000000 
 127.310222 36.001889 397.000000 127.310222 36.001889 392.000000 
 127.310222 36.002000 391.000000 127.310222 36.002000 385.000000 
 127.310222 36.002111 383.000000 127.310222 36.002111 380.000000 
 127.310222 36.002222 378.000000 127.310222 36.002222 374.000000 
 127.310333 36.002222 380.000000 127.310333 36.002222 375.000000 
 127.310333 36.002333 378.000000 127.310333 36.002333 372.000000 
 127.310333 36.002444 376.000000 127.310333 36.002444 370.000000 
 127.310444 36.002444 383.000000 127.310444 36.002444 374.000000 
 127.310444 36.002556 382.000000 127.310444 36.002556 373.000000 
 127.310444 36.002667 381.000000 127.310444 36.002667 373.000000 
 127.310556 36.002667 389.000000 127.310556 36.002667 380.000000 
 127.310556 36.002778 387.000000 127.310556 36.002778 380.000000 
 127.310556 36.002889 386.000000 127.310556 36.002889 379.000000 
 127.310667 36.002889 390.000000 127.310667 36.002889 386.000000 
 127.310667 36.003000 389.000000 127.310667 36.003000 385.000000 
 127.310667 36.003111 385.000000 127.310667 36.003111 382.000000 
 127.310778 36.003111 382.000000 127.310778 36.003111 381.000000 
 127.310778 36.003222 379.000000 127.310778 36.003222 376.000000 
 127.310778 36.003333 371.000000 127.310778 36.003333 370.000000 
 127.310778 36.003444 362.000000 127.310778 36.003444 358.000000 
 127.310889 36.003444 352.000000 127.310889 36.003444 349.000000 
 127.310889 36.003556 343.000000 127.310889 36.003556 344.000000 
 127.310889 36.003667 338.000000 127.310889 36.003667 334.000000 
 127.311000 36.003667 335.000000 127.311000 36.003667 330.000000 
 127.311000 36.003778 332.000000 127.311000 36.003778 325.000000 
 127.311000 36.003889 330.000000 127.311000 36.003889 322.000000 
 127.311111 36.003889 338.000000 127.311111 36.003889 327.000000 
 127.311111 36.004000 336.000000 127.311111 36.004000 326.000000 
 127.311111 36.004111 335.000000 127.311111 36.004111 326.000000 
 127.311222 36.004111 344.000000 127.311222 36.004111 334.000000 
 127.311222 36.004222 341.000000 127.311222 36.004222 332.000000 
 127.311222 36.004333 339.000000 127.311222 36.004333 329.000000 
 127.311333 36.004333 346.000000 127.311333 36.004333 335.000000 
 127.311333 36.004444 341.000000 127.311333 36.004444 331.000000 
 127.311333 36.004556 338.000000 127.311333 36.004556 328.000000 
 127.311333 36.004667 334.000000 127.311333 36.004667 323.000000 
 127.311444 36.004667 339.000000 127.311444 36.004667 328.000000 
 127.311444 36.004778 333.000000 127.311444 36.004778 324.000000 
 127.311444 36.004889 329.000000 127.311444 36.004889 320.000000 
 127.311556 36.004889 332.000000 127.311556 36.004889 323.000000 
 127.311556 36.005000 326.000000 127.311556 36.005000 320.000000 
 127.311556 36.005111 322.000000 127.311556 36.005111 313.000000 
 127.311667 36.005111 321.000000 127.311667 36.005111 314.000000 
 127.311667 36.005222 312.000000 127.311667 36.005222 309.000000 
 127.311667 36.005333 307.000000 127.311667 36.005333 301.000000 
 127.311778 36.005333 303.000000 127.311778 36.005333 298.000000 
 127.311778 36.005444 295.000000 127.311778 36.005444 292.000000 
 127.311778 36.005556 290.000000 127.311778 36.005556 281.000000 
 127.311889 36.005556 288.000000 127.311889 36.005556 282.000000 
 127.311889 36.005667 281.000000 127.311889 36.005667 275.000000 
 127.311889 36.005778 275.000000 127.311889 36.005778 269.000000 
 127.311889 36.005889 270.000000 127.311889 36.005889 266.000000 
 127.312000 36.005889 270.000000 127.312000 36.005889 268.000000 
 127.312000 36.006000 270.000000 127.312000 36.006000 270.000000 
 127.312000 36.006111 270.000000 127.312000 36.006111 271.000000 
 127.312111 36.006111 270.000000 127.312111 36.006111 270.000000 
 127.312111 36.006222 270.000000 127.312111 36.006222 275.000000 
 127.312111 36.006333 273.000000 127.312111 36.006333 279.000000 
 127.312222 36.006333 274.000000 127.312222 36.006333 277.000000 
 127.312222 36.006444 275.000000 127.312222 36.006444 281.000000 
 127.312222 36.006556 279.000000 127.312222 36.006556 287.000000 
 127.312333 36.006556 278.000000 127.312333 36.006556 286.000000 
 127.312333 36.006667 286.000000 127.312333 36.006667 291.000000 
 127.312333 36.006778 291.000000 127.312333 36.006778 300.000000 
 127.312444 36.006778 291.000000 127.312444 36.006778 300.000000 
 127.312444 36.006889 300.000000 127.312444 36.006889 305.000000 
 127.312444 36.007000 305.000000 127.312444 36.007000 312.000000 
 127.312444 36.007111 313.000000 127.312444 36.007111 316.000000 
 127.312556 36.007111 314.000000 127.312556 36.007111 318.000000 
 127.312556 36.007222 319.000000 127.312556 36.007222 324.000000 
 127.312556 36.007333 326.000000 127.312556 36.007333 329.000000 
 127.312667 36.007333 328.000000 127.312667 36.007333 331.000000 
 127.312667 36.007444 333.000000 127.312667 36.007444 338.000000 
 127.312667 36.007556 340.000000 127.312667 36.007556 342.000000 
 127.312778 36.007556 342.000000 127.312778 36.007556 344.000000 
 127.312778 36.007667 346.000000 127.312778 36.007667 350.000000 
 127.312778 36.007778 353.000000 127.312778 36.007778 354.000000 
 127.312889 36.007778 354.000000 127.312889 36.007778 356.000000 
 127.312889 36.007889 358.000000 127.312889 36.007889 362.000000 
 127.312889 36.008000 364.000000 127.312889 36.008000 365.000000 
 127.313000 36.008000 366.000000 127.313000 36.008000 368.000000 
 127.313000 36.008111 370.000000 127.313000 36.008111 372.000000 
 127.313000 36.008222 374.000000 127.313000 36.008222 378.000000 
 127.313000 36.008333 379.000000 127.313000 36.008333 381.000000 
 127.313111 36.008333 381.000000 127.313111 36.008333 383.000000 
 127.313111 36.008444 385.000000 127.313111 36.008444 389.000000 
 127.313111 36.008556 391.000000 127.313111 36.008556 392.000000 
 127.313222 36.008556 392.000000 127.313222 36.008556 395.000000 
 127.313222 36.008667 396.000000 127.313222 36.008667 401.000000 
 127.313222 36.008778 403.000000 127.313222 36.008778 405.000000 
 127.313333 36.008778 404.000000 127.313333 36.008778 407.000000 
 127.313333 36.008889 408.000000 127.313333 36.008889 413.000000 
 127.313333 36.009000 415.000000 127.313333 36.009000 417.000000 
 127.313444 36.009000 416.000000 127.313444 36.009000 419.000000 
 127.313444 36.009111 421.000000 127.313444 36.009111 426.000000 
 127.313444 36.009222 428.000000 127.313444 36.009222 431.000000 
 127.313556 36.009222 429.000000 127.313556 36.009222 433.000000 
 127.313556 36.009333 434.000000 127.313556 36.009333 440.000000 
 127.313556 36.009444 442.000000 127.313556 36.009444 443.000000 
 127.313556 36.009556 447.000000 127.313556 36.009556 448.000000 
 127.313667 36.009556 449.000000 127.313667 36.009556 452.000000 
 127.313667 36.009667 455.000000 127.313667 36.009667 454.000000 
 127.313667 36.009778 458.000000 127.313667 36.009778 454.000000 
 127.313778 36.009778 461.000000 127.313778 36.009778 460.000000 
 127.313778 36.009889 466.000000 127.313778 36.009889 460.000000 
 127.313778 36.010000 467.000000 127.313778 36.010000 461.000000 
 127.313889 36.010000 472.000000 127.313889 36.010000 468.000000 
 127.313889 36.010111 475.000000 127.313889 36.010111 469.000000 
 127.313889 36.010222 476.000000 127.313889 36.010222 469.000000 
 127.314000 36.010222 482.000000 127.314000 36.010222 475.000000 
 127.314000 36.010333 482.000000 127.314000 36.010333 476.000000 
 127.314000 36.010444 483.000000 127.314000 36.010444 481.000000 
 127.314111 36.010444 490.000000 127.314111 36.010444 486.000000 
 127.314111 36.010556 492.000000 127.314111 36.010556 494.000000 
 127.314111 36.010667 498.000000 127.314111 36.010667 498.000000 
 127.314111 36.010778 501.000000 127.314111 36.010778 499.000000 
 127.314222 36.010778 504.000000 127.314222 36.010778 502.000000 
 127.314222 36.010889 504.000000 127.314222 36.010889 500.000000 
 127.314222 36.011000 502.000000 127.314222 36.011000 492.000000 
 127.314333 36.011000 503.000000 127.314333 36.011000 494.000000 
 127.314333 36.011111 493.000000 127.314333 36.011111 487.000000 
 127.314333 36.011222 485.000000 127.314333 36.011222 477.000000 
 127.314444 36.011222 482.000000 127.314444 36.011222 473.000000 
 127.314444 36.011333 470.000000 127.314444 36.011333 465.000000 
 127.314444 36.011444 460.000000 127.314444 36.011444 450.000000 
 127.314556 36.011444 457.000000 127.314556 36.011444 446.000000 
 127.314556 36.011556 445.000000 127.314556 36.011556 438.000000 
 127.314556 36.011667 438.000000 127.314556 36.011667 430.000000 
 127.314667 36.011667 443.000000 127.314667 36.011667 431.000000 
 127.314667 36.011778 437.000000 127.314667 36.011778 422.000000 
 127.314667 36.011889 429.000000 127.314667 36.011889 417.000000 
 127.314667 36.012000 423.000000 127.314667 36.012000 409.000000 
 127.314778 36.012000 431.000000 127.314778 36.012000 416.000000 
 127.314778 36.012111 423.000000 127.314778 36.012111 410.000000 
 127.314778 36.012222 418.000000 127.314778 36.012222 400.000000 
 127.314889 36.012222 426.000000 127.314889 36.012222 406.000000 
 127.314889 36.012333 413.000000 127.314889 36.012333 397.000000 
 127.314889 36.012444 403.000000 127.314889 36.012444 386.000000 
 127.315000 36.012444 409.000000 127.315000 36.012444 390.000000 
 127.315000 36.012556 395.000000 127.315000 36.012556 382.000000 
 127.315000 36.012667 386.000000 127.315000 36.012667 368.000000 
 127.315111 36.012667 391.000000 127.315111 36.012667 371.000000 
 127.315111 36.012778 375.000000 127.315111 36.012778 363.000000 
 127.315111 36.012889 368.000000 127.315111 36.012889 355.000000 
 127.315222 36.012889 375.000000 127.315222 36.012889 361.000000 
 127.315222 36.013000 368.000000 127.315222 36.013000 358.000000 
 127.315222 36.013111 365.000000 127.315222 36.013111 353.000000 
 127.315333 36.013111 372.000000 127.315333 36.013111 360.000000 
 127.315333 36.013222 368.000000 127.315333 36.013222 358.000000 
 127.315333 36.013333 366.000000 127.315333 36.013333 356.000000 
 127.315333 36.013444 363.000000 127.315333 36.013444 354.000000 
 127.315444 36.013444 371.000000 127.315444 36.013444 362.000000 
 127.315444 36.013556 369.000000 127.315444 36.013556 360.000000 
 127.315444 36.013667 367.000000 127.315444 36.013667 357.000000 
 127.315556 36.013667 374.000000 127.315556 36.013667 364.000000 
 127.315556 36.013778 369.000000 127.315556 36.013778 361.000000 
 127.315556 36.013889 365.000000 127.315556 36.013889 357.000000 
 127.315667 36.013889 366.000000 127.315667 36.013889 358.000000 
 127.315667 36.014000 358.000000 127.315667 36.014000 353.000000 
 127.315667 36.014111 353.000000 127.315667 36.014111 346.000000 
 127.315778 36.014111 352.000000 127.315778 36.014111 345.000000 
 127.315778 36.014222 343.000000 127.315778 36.014222 340.000000 
 127.315778 36.014333 338.000000 127.315778 36.014333 332.000000 
 127.315889 36.014333 336.000000 127.315889 36.014333 330.000000 
 127.315889 36.014444 328.000000 127.315889 36.014444 325.000000 
 127.315889 36.014556 323.000000 127.315889 36.014556 315.000000 
 127.315889 36.014667 312.000000 127.315889 36.014667 308.000000 
 127.316000 36.014667 309.000000 127.316000 36.014667 306.000000 
 127.316000 36.014778 303.000000 127.316000 36.014778 297.000000 
 127.316000 36.014889 298.000000 127.316000 36.014889 295.000000 
 127.316111 36.014889 302.000000 127.316111 36.014889 298.000000 
 127.316111 36.015000 305.000000 127.316111 36.015000 302.000000 
 127.316111 36.015111 309.000000 127.316111 36.015111 305.000000 
 127.316222 36.015111 317.000000 127.316222 36.015111 312.000000 
 127.316222 36.015222 320.000000 127.316222 36.015222 315.000000 
 127.316222 36.015333 323.000000 127.316222 36.015333 319.000000 
 127.316333 36.015333 329.000000 127.316333 36.015333 325.000000 
 127.316333 36.015444 328.000000 127.316333 36.015444 322.000000 
 127.316333 36.015556 324.000000 127.316333 36.015556 314.000000 
 127.316444 36.015556 325.000000 127.316444 36.015556 314.000000 
 127.316444 36.015667 315.000000 127.316444 36.015667 307.000000 
 127.316444 36.015778 307.000000 127.316444 36.015778 296.000000 
 127.316444 36.015889 295.000000 127.316444 36.015889 287.000000 
 127.316556 36.015889 294.000000 127.316556 36.015889 285.000000 
 127.316556 36.016000 284.000000 127.316556 36.016000 272.000000 
 127.316556 36.016111 269.000000 127.316556 36.016111 263.000000 
 127.316667 36.016111 267.000000 127.316667 36.016111 260.000000 
 127.316667 36.016222 258.000000 127.316667 36.016222 250.000000 
 127.316667 36.016333 251.000000 127.316667 36.016333 250.000000 
 127.316778 36.016333 253.000000 127.316778 36.016333 251.000000 
 127.316778 36.016444 252.000000 127.316778 36.016444 252.000000 
 127.316778 36.016556 254.000000 127.316778 36.016556 254.000000 
 127.316889 36.016556 256.000000 127.316889 36.016556 256.000000 
 127.316889 36.016667 258.000000 127.316889 36.016667 259.000000 
 127.316889 36.016778 263.000000 127.316889 36.016778 263.000000 
 127.317000 36.016778 265.000000 127.317000 36.016778 267.000000 
 127.317000 36.016889 270.000000 127.317000 36.016889 275.000000 
 127.317000 36.017000 278.000000 127.317000 36.017000 280.000000 
 127.317000 36.017111 283.000000 127.317000 36.017111 285.000000 
 127.317111 36.017111 285.000000 127.317111 36.017111 289.000000 
 127.317111 36.017222 291.000000 127.317111 36.017222 298.000000 
 127.317111 36.017333 300.000000 127.317111 36.017333 304.000000 
 127.317222 36.017333 300.000000 127.317222 36.017333 306.000000 
 127.317222 36.017444 306.000000 127.317222 36.017444 315.000000 
 127.317222 36.017556 315.000000 127.317222 36.017556 321.000000 
 127.317333 36.017556 313.000000 127.317333 36.017556 321.000000 
 127.317333 36.017667 318.000000 127.317333 36.017667 329.000000 
 127.317333 36.017778 326.000000 127.317333 36.017778 334.000000 
 127.317444 36.017778 322.000000 127.317444 36.017778 331.000000 
 127.317444 36.017889 327.000000 127.317444 36.017889 337.000000 
 127.317444 36.018000 333.000000 127.317444 36.018000 342.000000 
 127.317556 36.018000 328.000000 127.317556 36.018000 337.000000 
 127.317556 36.018111 332.000000 127.317556 36.018111 344.000000 
 127.317556 36.018222 339.000000 127.317556 36.018222 349.000000 
 127.317667 36.018333 338.000000 127.317667 36.018333 351.000000 
 127.317667 36.018444 346.000000 127.317667 36.018444 355.000000 
 127.317667 36.018556 351.000000 127.317667 36.018556 362.000000 
 127.317778 36.018556 345.000000 127.317778 36.018556 357.000000 
 127.317778 36.018667 352.000000 127.317778 36.018667 361.000000 
 127.317778 36.018778 356.000000 127.317778 36.018778 365.000000 
 127.317889 36.018778 352.000000 127.317889 36.018778 360.000000 
 127.317889 36.018889 356.000000 127.317889 36.018889 366.000000 
 127.317889 36.019000 362.000000 127.317889 36.019000 370.000000 
 127.318000 36.019000 360.000000 127.318000 36.019000 366.000000 
 127.318000 36.019111 365.000000 127.318000 36.019111 374.000000 
 127.318000 36.019222 373.000000 127.318000 36.019222 381.000000 
 127.318111 36.019222 373.000000 127.318111 36.019222 380.000000 
 127.318111 36.019333 380.000000 127.318111 36.019333 391.000000 
 127.318111 36.019444 390.000000 127.318111 36.019444 398.000000 
 127.318222 36.019444 391.000000 127.318222 36.019444 397.000000 
 127.318222 36.019556 398.000000 127.318222 36.019556 409.000000 
 127.318222 36.019667 411.000000 127.318222 36.019667 417.000000 
 127.318222 36.019778 419.000000 127.318222 36.019778 427.000000 
 127.318333 36.019778 423.000000 127.318333 36.019778 429.000000 
 127.318333 36.019889 432.000000 127.318333 36.019889 435.000000 
 127.318333 36.020000 438.000000 127.318333 36.020000 440.000000 
 127.318444 36.020000 440.000000 127.318444 36.020000 443.000000 
 127.318444 36.020111 447.000000 127.318444 36.020111 443.000000 
 127.318444 36.020222 447.000000 127.318444 36.020222 437.000000 
 127.318556 36.020222 451.000000 127.318556 36.020222 442.000000 
 127.318556 36.020333 447.000000 127.318556 36.020333 436.000000 
 127.318556 36.020444 441.000000 127.318556 36.020444 426.000000 
 127.318667 36.020444 447.000000 127.318667 36.020444 431.000000 
 127.318667 36.020556 437.000000 127.318667 36.020556 424.000000 
 127.318667 36.020667 429.000000 127.318667 36.020667 419.000000 
 127.318778 36.020667 433.000000 127.318778 36.020667 423.000000 
 127.318778 36.020778 425.000000 127.318778 36.020778 414.000000 
 127.318778 36.020889 416.000000 127.318778 36.020889 409.000000 
 127.318778 36.021000 410.000000 127.318778 36.021000 400.000000 
 127.318889 36.021000 411.000000 127.318889 36.021000 401.000000 
 127.318889 36.021111 402.000000 127.318889 36.021111 393.000000 
 127.318889 36.021222 394.000000 127.318889 36.021222 381.000000 
 127.319000 36.021222 395.000000 127.319000 36.021222 381.000000 
 127.319000 36.021333 383.000000 127.319000 36.021333 372.000000 
 127.319000 36.021444 375.000000 127.319000 36.021444 358.000000 
 127.319111 36.021444 377.000000 127.319111 36.021444 360.000000 
 127.319111 36.021556 360.000000 127.319111 36.021556 349.000000 
 127.319111 36.021667 348.000000 127.319111 36.021667 336.000000 
 127.319222 36.021667 347.000000 127.319222 36.021667 336.000000 
 127.319222 36.021778 341.000000 127.319222 36.021778 336.000000 
 127.319222 36.021889 343.000000 127.319222 36.021889 340.000000 
 127.319333 36.021889 351.000000 127.319333 36.021889 349.000000 
 127.319333 36.022000 356.000000 127.319333 36.022000 352.000000 
 127.319333 36.022111 360.000000 127.319333 36.022111 356.000000 
 127.319444 36.022222 372.000000 127.319444 36.022222 365.000000 
 127.319444 36.022333 373.000000 127.319444 36.022333 365.000000 
 127.319444 36.022444 373.000000 127.319444 36.022444 363.000000 
 127.319556 36.022444 378.000000 127.319556 36.022444 370.000000 
 127.319556 36.022556 377.000000 127.319556 36.022556 368.000000 
 127.319556 36.022667 375.000000 127.319556 36.022667 362.000000 
 127.319667 36.022667 378.000000 127.319667 36.022667 368.000000 
 127.319667 36.022778 372.000000 127.319667 36.022778 363.000000 
 127.319667 36.022889 367.000000 127.319667 36.022889 357.000000 
 127.319778 36.022889 368.000000 127.319778 36.022889 360.000000 
 127.319778 36.023000 361.000000 127.319778 36.023000 355.000000 
 127.319778 36.023111 356.000000 127.319778 36.023111 347.000000 
 127.319889 36.023111 356.000000 127.319889 36.023111 348.000000 
 127.319889 36.023222 348.000000 127.319889 36.023222 342.000000 
 127.319889 36.023333 342.000000 127.319889 36.023333 333.000000 
 127.320000 36.023333 343.000000 127.320000 36.023333 335.000000 
 127.320000 36.023444 336.000000 127.320000 36.023444 330.000000 
 127.320000 36.023556 334.000000 127.320000 36.023556 331.000000 
 127.320000 36.023667 334.000000 127.320000 36.023667 334.000000 
 127.320111 36.023667 338.000000 127.320111 36.023667 338.000000 
 127.320111 36.023778 342.000000 127.320111 36.023778 347.000000 
 127.320111 36.023889 351.000000 127.320111 36.023889 353.000000 
 127.320222 36.023889 356.000000 127.320222 36.023889 358.000000 
 127.320222 36.024000 363.000000 127.320222 36.024000 368.000000 
 127.320222 36.024111 373.000000 127.320222 36.024111 374.000000 
 127.320333 36.024111 377.000000 127.320333 36.024111 378.000000 
 127.320333 36.024222 382.000000 127.320333 36.024222 384.000000 
 127.320333 36.024333 388.000000 127.320333 36.024333 387.000000 
 127.320444 36.024333 392.000000 127.320444 36.024333 392.000000 
 127.320444 36.024444 398.000000 127.320444 36.024444 392.000000 
 127.320444 36.024556 398.000000 127.320444 36.024556 392.000000 
 127.320556 36.024556 406.000000 127.320556 36.024556 398.000000 
 127.320556 36.024667 406.000000 127.320556 36.024667 399.000000 
 127.320556 36.024778 407.000000 127.320556 36.024778 401.000000 
 127.320556 36.024889 408.000000 127.320556 36.024889 404.000000 
 127.320667 36.024889 415.000000 127.320667 36.024889 408.000000 
 127.320667 36.025000 415.000000 127.320667 36.025000 413.000000 
 127.320667 36.025111 417.000000 127.320667 36.025111 421.000000 
 127.320778 36.025111 422.000000 127.320778 36.025111 421.000000 
 127.320778 36.025222 424.000000 127.320778 36.025222 431.000000 
 127.320778 36.025333 432.000000 127.320778 36.025333 439.000000 
 127.320889 36.025333 437.000000 127.320889 36.025333 437.000000 
 127.320889 36.025444 441.000000 127.320889 36.025444 447.000000 
 127.320889 36.025556 449.000000 127.320889 36.025556 456.000000 
 127.321000 36.025556 454.000000 127.321000 36.025556 456.000000 
 127.321000 36.025667 461.000000 127.321000 36.025667 471.000000 
 127.321000 36.025778 473.000000 127.321000 36.025778 480.000000 
 127.321111 36.025778 477.000000 127.321111 36.025778 482.000000 
 127.321111 36.025889 485.000000 127.321111 36.025889 490.000000 
 127.321111 36.026000 493.000000 127.321111 36.026000 503.000000 
 127.321222 36.026000 497.000000 127.321222 36.026000 504.000000 
 127.321222 36.026111 508.000000 127.321222 36.026111 511.000000 
 127.321222 36.026222 514.000000 127.321222 36.026222 520.000000 
 127.321222 36.026333 523.000000 127.321222 36.026333 526.000000 
 127.321333 36.026333 528.000000 127.321333 36.026333 528.000000 
 127.321333 36.026444 535.000000 127.321333 36.026444 535.000000 
 127.321333 36.026556 535.000000 127.321333 36.026556 533.000000 
 127.321444 36.026556 534.000000 127.321444 36.026556 534.000000 
 127.321444 36.026667 531.000000 127.321444 36.026667 530.000000 
 127.321444 36.026778 529.000000 127.321444 36.026778 530.000000 
 127.321556 36.026778 523.000000 127.321556 36.026778 526.000000 
 127.321556 36.026889 520.000000 127.321556 36.026889 522.000000 
 127.321556 36.027000 516.000000 127.321556 36.027000 518.000000 
 127.321667 36.027000 509.000000 127.321667 36.027000 512.000000 
 127.321667 36.027111 506.000000 127.321667 36.027111 504.000000 
 127.321667 36.027222 499.000000 127.321667 36.027222 499.000000 
 127.321778 36.027222 492.000000 127.321778 36.027222 493.000000 
 127.321778 36.027333 486.000000 127.321778 36.027333 483.000000 
 127.321778 36.027444 477.000000 127.321778 36.027444 477.000000 
 127.321889 36.027444 469.000000 127.321889 36.027444 469.000000 
 127.321889 36.027556 460.000000 127.321889 36.027556 457.000000 
 127.321889 36.027667 449.000000 127.321889 36.027667 450.000000 
 127.321889 36.027778 447.000000 127.321889 36.027778 448.000000 
 127.322000 36.027778 446.000000 127.322000 36.027778 446.000000 
 127.322000 36.027889 443.000000 127.322000 36.027889 443.000000 
 127.322000 36.028000 438.000000 127.322000 36.028000 439.000000 
 127.322111 36.028000 432.000000 127.322111 36.028000 432.000000 
 127.322111 36.028111 426.000000 127.322111 36.028111 427.000000 
 127.322111 36.028222 422.000000 127.322111 36.028222 427.000000 
 127.322222 36.028222 416.000000 127.322222 36.028222 422.000000 
 127.322222 36.028333 415.000000 127.322222 36.028333 423.000000 
 127.322222 36.028444 415.000000 127.322222 36.028444 423.000000 
 127.322333 36.028444 408.000000 127.322333 36.028444 415.000000 
 127.322333 36.028556 406.000000 127.322333 36.028556 413.000000 
 127.322333 36.028667 402.000000 127.322333 36.028667 413.000000 
 127.322444 36.028667 396.000000 127.322444 36.028667 403.000000 
 127.322444 36.028778 396.000000 127.322444 36.028778 409.000000 
 127.322444 36.028889 400.000000 127.322444 36.028889 413.000000 
 127.322556 36.028889 395.000000 127.322556 36.028889 405.000000 
 127.322556 36.029000 399.000000 127.322556 36.029000 411.000000 
 127.322556 36.029111 405.000000 127.322556 36.029111 412.000000 
 127.322556 36.029222 407.000000 127.322556 36.029222 410.000000 
 127.322667 36.029222 402.000000 127.322667 36.029222 405.000000 
 127.322667 36.029333 400.000000 127.322667 36.029333 402.000000 
 127.322667 36.029444 396.000000 127.322667 36.029444 399.000000 
 127.322778 36.029444 390.000000 127.322778 36.029444 393.000000 
 127.322778 36.029556 387.000000 127.322778 36.029556 389.000000 
 127.322778 36.029667 383.000000 127.322778 36.029667 386.000000 
 127.322889 36.029667 377.000000 127.322889 36.029667 381.000000 
 127.322889 36.029778 375.000000 127.322889 36.029778 377.000000 
 127.322889 36.029889 371.000000 127.322889 36.029889 374.000000 
 127.323000 36.029889 364.000000 127.323000 36.029889 368.000000 
 127.323000 36.030000 362.000000 127.323000 36.030000 364.000000 
 127.323000 36.030111 358.000000 127.323000 36.030111 360.000000 
 127.323111 36.030111 352.000000 127.323111 36.030111 355.000000 
 127.323111 36.030222 350.000000 127.323111 36.030222 351.000000 
 127.323111 36.030333 345.000000 127.323111 36.030333 347.000000 
 127.323222 36.030333 339.000000 127.323222 36.030333 341.000000 
 127.323222 36.030444 335.000000 127.323222 36.030444 335.000000 
 127.323222 36.030556 329.000000 127.323222 36.030556 331.000000 
 127.323222 36.030667 325.000000 127.323222 36.030667 325.000000 
 127.323333 36.030667 319.000000 127.323333 36.030667 319.000000 
 127.323333 36.030778 311.000000 127.323333 36.030778 314.000000 
 127.323333 36.030889 307.000000 127.323333 36.030889 308.000000 
 127.323444 36.030889 300.000000 127.323444 36.030889 300.000000 
 127.323444 36.031000 297.000000 127.323444 36.031000 298.000000 
 127.323444 36.031111 296.000000 127.323444 36.031111 296.000000 
 127.323556 36.031111 295.000000 127.323556 36.031111 295.000000 
 127.323556 36.031222 295.000000 127.323556 36.031222 293.000000 
 127.323556 36.031333 293.000000 127.323556 36.031333 291.000000 
 127.323667 36.031333 298.000000 127.323667 36.031333 294.000000 
 127.323667 36.031444 298.000000 127.323667 36.031444 294.000000 
 127.323667 36.031556 299.000000 127.323667 36.031556 294.000000 
 127.323778 36.031556 306.000000 127.323778 36.031556 299.000000 
 127.323778 36.031667 307.000000 127.323778 36.031667 300.000000 
 127.323778 36.031778 308.000000 127.323778 36.031778 301.000000 
 127.323889 36.031778 317.000000 127.323889 36.031778 309.000000 
 127.323889 36.031889 317.000000 127.323889 36.031889 310.000000 
 127.323889 36.032000 318.000000 127.323889 36.032000 310.000000 
 127.323889 36.032111 318.000000 127.323889 36.032111 309.000000 
 127.324000 36.032111 327.000000 127.324000 36.032111 317.000000 
 127.324000 36.032222 326.000000 127.324000 36.032222 316.000000 
 127.324000 36.032333 325.000000 127.324000 36.032333 314.000000 
 127.324111 36.032333 334.000000 127.324111 36.032333 322.000000 
 127.324111 36.032444 329.000000 127.324111 36.032444 318.000000 
 127.324111 36.032556 325.000000 127.324111 36.032556 311.000000 
 127.324222 36.032556 330.000000 127.324222 36.032556 316.000000 
 127.324222 36.032667 320.000000 127.324222 36.032667 308.000000 
 127.324222 36.032778 311.000000 127.324222 36.032778 297.000000 
 127.324333 36.032778 313.000000 127.324333 36.032778 298.000000 
 127.324333 36.032889 299.000000 127.324333 36.032889 292.000000 
 127.324333 36.033000 294.000000 127.324333 36.033000 287.000000 
 127.324444 36.033000 295.000000 127.324444 36.033000 290.000000 
 127.324444 36.033111 290.000000 127.324444 36.033111 288.000000 
 127.324444 36.033222 293.000000 127.324444 36.033222 292.000000 
 127.324556 36.033333 303.000000 127.324556 36.033333 305.000000 
 127.324556 36.033444 310.000000 127.324556 36.033444 308.000000 
 127.324556 36.033556 314.000000 127.324556 36.033556 308.000000 
 127.324667 36.033556 319.000000 127.324667 36.033556 315.000000 
 127.324667 36.033667 322.000000 127.324667 36.033667 313.000000 
 127.324667 36.033778 320.000000 127.324667 36.033778 307.000000 
 127.324778 36.033778 327.000000 127.324778 36.033778 314.000000 
 127.324778 36.033889 321.000000 127.324778 36.033889 309.000000 
 127.324778 36.034000 316.000000 127.324778 36.034000 301.000000 
 127.324889 36.034000 322.000000 127.324889 36.034000 307.000000 
 127.324889 36.034111 313.000000 127.324889 36.034111 301.000000 
 127.324889 36.034222 306.000000 127.324889 36.034222 289.000000 
 127.325000 36.034222 311.000000 127.325000 36.034222 295.000000 
 127.325000 36.034333 299.000000 127.325000 36.034333 288.000000 
 127.325000 36.034444 292.000000 127.325000 36.034444 279.000000 
 127.325111 36.034444 295.000000 127.325111 36.034444 283.000000 
 127.325111 36.034556 287.000000 127.325111 36.034556 279.000000 
 127.325111 36.034667 283.000000 127.325111 36.034667 276.000000 
 127.325111 36.034778 281.000000 127.325111 36.034778 273.000000 
 127.325222 36.034778 288.000000 127.325222 36.034778 279.000000 
 127.325222 36.034889 286.000000 127.325222 36.034889 275.000000 
 127.325222 36.035000 283.000000 127.325222 36.035000 270.000000 
 127.325333 36.035000 290.000000 127.325333 36.035000 275.000000 
 127.325333 36.035111 282.000000 127.325333 36.035111 272.000000 
 127.325333 36.035222 277.000000 127.325333 36.035222 266.000000 
 127.325444 36.035222 284.000000 127.325444 36.035222 271.000000 
 127.325444 36.035333 277.000000 127.325444 36.035333 268.000000 
 127.325444 36.035444 273.000000 127.325444 36.035444 263.000000 
 127.325556 36.035444 278.000000 127.325556 36.035444 268.000000 
 127.325556 36.035556 272.000000 127.325556 36.035556 265.000000 
 127.325556 36.035667 269.000000 127.325556 36.035667 261.000000 
 127.325667 36.035667 273.000000 127.325667 36.035667 265.000000 
 127.325667 36.035778 268.000000 127.325667 36.035778 262.000000 
 127.325667 36.035889 265.000000 127.325667 36.035889 260.000000 
 127.325778 36.035889 269.000000 127.325778 36.035889 264.000000 
 127.325778 36.036000 267.000000 127.325778 36.036000 263.000000 
 127.325778 36.036111 267.000000 127.325778 36.036111 261.000000 
 127.325778 36.036222 265.000000 127.325778 36.036222 258.000000 
 127.325889 36.036222 270.000000 127.325889 36.036222 263.000000 
 127.325889 36.036333 268.000000 127.325889 36.036333 258.000000 
 127.325889 36.036444 263.000000 127.325889 36.036444 254.000000 
 127.326000 36.036444 269.000000 127.326000 36.036444 259.000000 
 127.326000 36.036556 265.000000 127.326000 36.036556 255.000000 
 127.326000 36.036667 261.000000 127.326000 36.036667 248.000000 
 127.326111 36.036667 265.000000 127.326111 36.036667 255.000000 
 127.326111 36.036778 261.000000 127.326111 36.036778 250.000000 
 127.326111 36.036889 256.000000 127.326111 36.036889 244.000000 
 127.326222 36.036889 262.000000 127.326222 36.036889 249.000000 
 127.326222 36.037000 255.000000 127.326222 36.037000 244.000000 
 127.326222 36.037111 249.000000 127.326222 36.037111 238.000000 
 127.326333 36.037111 255.000000 127.326333 36.037111 242.000000 
 127.326333 36.037222 247.000000 127.326333 36.037222 238.000000 
 127.326333 36.037333 242.000000 127.326333 36.037333 235.000000 
 127.326333 36.037444 235.000000 127.326333 36.037444 235.000000 
 127.326444 36.037444 239.000000 127.326444 36.037444 235.000000 
 127.326444 36.037556 235.000000 127.326444 36.037556 235.000000 
 127.326444 36.037667 235.000000 127.326444 36.037667 235.000000 
 127.326556 36.037667 235.000000 127.326556 36.037667 235.000000 
 127.326556 36.037778 235.000000 127.326556 36.037778 235.000000 
 127.326556 36.037889 235.000000 127.326556 36.037889 238.000000 
 127.326667 36.037889 235.000000 127.326667 36.037889 236.000000 
 127.326667 36.038000 235.000000 127.326667 36.038000 241.000000 
 127.326667 36.038111 239.000000 127.326667 36.038111 245.000000 
 127.326778 36.038111 237.000000 127.326778 36.038111 243.000000 
 127.326778 36.038222 240.000000 127.326778 36.038222 248.000000 
 127.326778 36.038333 245.000000 127.326778 36.038333 251.000000 
 127.326889 36.038333 242.000000 127.326889 36.038333 248.000000 
 127.326889 36.038444 246.000000 127.326889 36.038444 252.000000 
 127.326889 36.038556 248.000000 127.326889 36.038556 257.000000 
 127.327000 36.038556 246.000000 127.327000 36.038556 254.000000 
 127.327000 36.038667 250.000000 127.327000 36.038667 257.000000 
 127.327000 36.038778 254.000000 127.327000 36.038778 263.000000 
 127.327000 36.038889 259.000000 127.327000 36.038889 266.000000 
 127.327111 36.038889 256.000000 127.327111 36.038889 262.000000 
 127.327111 36.039000 258.000000 127.327111 36.039000 266.000000 
 127.327111 36.039111 261.000000 127.327111 36.039111 268.000000 
 127.327222 36.039111 256.000000 127.327222 36.039111 263.000000 
 127.327222 36.039222 257.000000 127.327222 36.039222 266.000000 
 127.327222 36.039333 261.000000 127.327222 36.039333 270.000000 
 127.327333 36.039333 256.000000 127.327333 36.039333 265.000000 
 127.327333 36.039444 260.000000 127.327333 36.039444 271.000000 
 127.327333 36.039556 266.000000 127.327333 36.039556 275.000000 
 127.327444 36.039556 261.000000 127.327444 36.039556 270.000000 
 127.327444 36.039667 265.000000 127.327444 36.039667 277.000000 
 127.327444 36.039778 272.000000 127.327444 36.039778 284.000000 
 127.327556 36.039778 269.000000 127.327556 36.039778 279.000000 
 127.327556 36.039889 275.000000 127.327556 36.039889 289.000000 
 127.327556 36.040000 284.000000 127.327556 36.040000 294.000000 
 127.327556 36.040111 289.000000 127.327556 36.040111 300.000000 
 127.327667 36.040111 285.000000 127.327667 36.040111 295.000000 
 127.327667 36.040222 293.000000 127.327667 36.040222 304.000000 
 127.327667 36.040333 299.000000 127.327667 36.040333 311.000000 
 127.327778 36.040333 294.000000 127.327778 36.040333 305.000000 
 127.327778 36.040444 300.000000 127.327778 36.040444 314.000000 
 127.327778 36.040556 309.000000 127.327778 36.040556 319.000000 
 127.327889 36.040556 304.000000 127.327889 36.040556 313.000000 
 127.327889 36.040667 308.000000 127.327889 36.040667 317.000000 
 127.327889 36.040778 311.000000 127.327889 36.040778 320.000000 
 127.328000 36.040778 304.000000 127.328000 36.040778 313.000000 
 127.328000 36.040889 306.000000 127.328000 36.040889 318.000000 
 127.328000 36.041000 311.000000 127.328000 36.041000 323.000000 
 127.328111 36.041000 305.000000 127.328111 36.041000 317.000000 
 127.328111 36.041111 310.000000 127.328111 36.041111 326.000000 
 127.328111 36.041222 320.000000 127.328111 36.041222 331.000000 
 127.328111 36.041333 327.000000 127.328111 36.041333 339.000000 
 127.328222 36.041333 321.000000 127.328222 36.041333 334.000000 
 127.328222 36.041444 330.000000 127.328222 36.041444 340.000000 
 127.328222 36.041556 334.000000 127.328222 36.041556 346.000000 
 127.328333 36.041556 327.000000 127.328333 36.041556 338.000000 
 127.328333 36.041667 330.000000 127.328333 36.041667 338.000000 
 127.328333 36.041778 330.000000 127.328333 36.041778 332.000000 
 127.328444 36.041778 322.000000 127.328444 36.041778 324.000000 
 127.328444 36.041889 317.000000 127.328444 36.041889 319.000000 
 127.328444 36.042000 311.000000 127.328444 36.042000 312.000000 
 127.328556 36.042000 304.000000 127.328556 36.042000 304.000000 
 127.328556 36.042111 298.000000 127.328556 36.042111 293.000000 
 127.328556 36.042222 287.000000 127.328556 36.042222 288.000000 
 127.328667 36.042222 281.000000 127.328667 36.042222 280.000000 
 127.328667 36.042333 273.000000 127.328667 36.042333 277.000000 
 127.328667 36.042444 266.000000 127.328667 36.042444 274.000000 
 127.328778 36.042556 258.000000 127.328778 36.042556 262.000000 
 127.328778 36.042667 254.000000 127.328778 36.042667 260.000000 
 127.328778 36.042778 252.000000 127.328778 36.042778 256.000000 
 127.328889 36.042778 244.000000 127.328889 36.042778 249.000000 
 127.328889 36.042889 239.000000 127.328889 36.042889 246.000000 
 127.328889 36.043000 236.000000 127.328889 36.043000 240.000000 
 127.329000 36.043000 227.000000 127.329000 36.043000 231.000000 
 127.329000 36.043111 221.000000 127.329000 36.043111 227.000000 
 127.329000 36.043222 218.000000 127.329000 36.043222 222.000000 
 127.329111 36.043222 209.000000 127.329111 36.043222 213.000000 
 127.329111 36.043333 204.000000 127.329111 36.043333 209.000000 
 127.329111 36.043444 200.000000 127.329111 36.043444 203.000000 
 127.329222 36.043444 191.000000 127.329222 36.043444 193.000000 
 127.329222 36.043556 187.000000 127.329222 36.043556 189.000000 
 127.329222 36.043667 185.000000 127.329222 36.043667 188.000000 
 127.329333 36.043667 185.000000 127.329333 36.043667 185.000000 
 127.329333 36.043778 185.000000 127.329333 36.043778 185.000000 
 127.329333 36.043889 185.000000 127.329333 36.043889 185.000000 
 127.329333 36.044000 185.000000 127.329333 36.044000 185.000000 
 127.329444 36.044000 188.000000 127.329444 36.044000 185.000000 
 127.329444 36.044111 185.000000 127.329444 36.044111 185.000000 
 127.329444 36.044222 188.000000 127.329444 36.044222 186.000000 
 127.329556 36.044222 201.000000 127.329556 36.044222 191.000000 
 127.329556 36.044333 202.000000 127.329556 36.044333 192.000000 
 127.329556 36.044444 203.000000 127.329556 36.044444 194.000000 
 127.329667 36.044444 210.000000 127.329667 36.044444 203.000000 
 127.329667 36.044556 210.000000 127.329667 36.044556 204.000000 
 127.329667 36.044667 210.000000 127.329667 36.044667 204.000000 
 127.329778 36.044667 216.000000 127.329778 36.044667 209.000000 
 127.329778 36.044778 215.000000 127.329778 36.044778 209.000000 
 127.329778 36.044889 215.000000 127.329778 36.044889 207.000000 
 127.329889 36.044889 220.000000 127.329889 36.044889 213.000000 
 127.329889 36.045000 219.000000 127.329889 36.045000 212.000000 
 127.329889 36.045111 218.000000 127.329889 36.045111 211.000000 
 127.329889 36.045222 217.000000 127.329889 36.045222 210.000000 
 127.330000 36.045222 223.000000 127.330000 36.045222 216.000000 
 127.330000 36.045333 223.000000 127.330000 36.045333 215.000000 
 127.330000 36.045444 221.000000 127.330000 36.045444 213.000000 
 127.330111 36.045444 227.000000 127.330111 36.045444 219.000000 
 127.330111 36.045556 225.000000 127.330111 36.045556 216.000000 
 127.330111 36.045667 221.000000 127.330111 36.045667 211.000000 
 127.330222 36.045667 225.000000 127.330222 36.045667 214.000000 
 127.330222 36.045778 217.000000 127.330222 36.045778 207.000000 
 127.330222 36.045889 209.000000 127.330222 36.045889 195.000000 
 127.330333 36.045889 210.000000 127.330333 36.045889 195.000000 
 127.330333 36.046000 196.000000 127.330333 36.046000 186.000000 
 127.330333 36.046111 187.000000 127.330333 36.046111 175.000000 
 127.330444 36.046111 187.000000 127.330444 36.046111 175.000000 
 127.330444 36.046222 176.000000 127.330444 36.046222 175.000000 
 127.330444 36.046333 175.000000 127.330444 36.046333 175.000000 
 127.330556 36.046444 175.000000 127.330556 36.046444 178.000000 
 127.330556 36.046556 177.000000 127.330556 36.046556 187.000000 
 127.330556 36.046667 186.000000 127.330556 36.046667 193.000000 
 127.330667 36.046667 185.000000 127.330667 36.046667 193.000000 
 127.330667 36.046778 192.000000 127.330667 36.046778 202.000000 
 127.330667 36.046889 201.000000 127.330667 36.046889 209.000000 
 127.330778 36.046889 199.000000 127.330778 36.046889 207.000000 
 127.330778 36.047000 205.000000 127.330778 36.047000 215.000000 
 127.330778 36.047111 213.000000 127.330778 36.047111 220.000000 
 127.330889 36.047111 210.000000 127.330889 36.047111 217.000000 
 127.330889 36.047222 214.000000 127.330889 36.047222 224.000000 
 127.330889 36.047333 220.000000 127.330889 36.047333 229.000000 
 127.331000 36.047333 215.000000 127.331000 36.047333 224.000000 
 127.331000 36.047444 219.000000 127.331000 36.047444 229.000000 
 127.331000 36.047556 224.000000 127.331000 36.047556 235.000000 
 127.331111 36.047556 217.000000 127.331111 36.047556 229.000000 
 127.331111 36.047667 222.000000 127.331111 36.047667 232.000000 
 127.331111 36.047778 224.000000 127.331111 36.047778 236.000000 
 127.331111 36.047889 228.000000 127.331111 36.047889 240.000000 
 127.331222 36.047889 221.000000 127.331222 36.047889 231.000000 
 127.331222 36.048000 224.000000 127.331222 36.048000 238.000000 
 127.331222 36.048111 231.000000 127.331222 36.048111 243.000000 
 127.331333 36.048111 224.000000 127.331333 36.048111 236.000000 
 127.331333 36.048222 229.000000 127.331333 36.048222 243.000000 
 127.331333 36.048333 237.000000 127.331333 36.048333 248.000000 
 127.331444 36.048333 230.000000 127.331444 36.048333 241.000000 
 127.331444 36.048444 234.000000 127.331444 36.048444 245.000000 
 127.331444 36.048556 238.000000 127.331444 36.048556 247.000000 
 127.331556 36.048556 230.000000 127.331556 36.048556 239.000000 
 127.331556 36.048667 232.000000 127.331556 36.048667 240.000000 
 127.331556 36.048778 233.000000 127.331556 36.048778 238.000000 
 127.331667 36.048778 226.000000 127.331667 36.048778 232.000000 
 127.331667 36.048889 226.000000 127.331667 36.048889 226.000000 
 127.331667 36.049000 221.000000 127.331667 36.049000 221.000000 
 127.331667 36.049111 216.000000 127.331667 36.049111 217.000000 
 127.331778 36.049111 210.000000 127.331778 36.049111 212.000000 
 127.331778 36.049222 206.000000 127.331778 36.049222 212.000000 
 127.331778 36.049333 207.000000 127.331778 36.049333 215.000000 
 127.331889 36.049333 201.000000 127.331889 36.049333 209.000000 
 127.331889 36.049444 203.000000 127.331889 36.049444 211.000000 
 127.331889 36.049556 204.000000 127.331889 36.049556 212.000000 
 127.332000 36.049556 198.000000 127.332000 36.049556 205.000000 
 127.332000 36.049667 198.000000 127.332000 36.049667 204.000000 
 127.332000 36.049778 197.000000 127.332000 36.049778 204.000000 
 127.332111 36.049778 190.000000 127.332111 36.049778 196.000000 
 127.332111 36.049889 189.000000 127.332111 36.049889 195.000000 
 127.332111 36.050000 188.000000 127.332111 36.050000 193.000000 
 127.332222 36.050000 180.000000 127.332222 36.050000 186.000000 
 127.332222 36.050111 179.000000 127.332222 36.050111 182.000000 
 127.332222 36.050222 175.000000 127.332222 36.050222 179.000000 
 127.332333 36.050222 173.000000 127.332333 36.050222 174.000000 
 127.332333 36.050333 172.000000 127.332333 36.050333 174.000000 
 127.332333 36.050444 173.000000 127.332333 36.050444 182.000000 
 127.332333 36.050556 177.000000 127.332333 36.050556 196.000000 
 127.332444 36.050556 173.000000 127.332444 36.050556 192.000000 
 127.332444 36.050667 185.000000 127.332444 36.050667 201.000000 
 127.332444 36.050778 195.000000 127.332444 36.050778 208.000000 
 127.332556 36.050778 188.000000 127.332556 36.050778 203.000000 
 127.332556 36.050889 197.000000 127.332556 36.050889 206.000000 
 127.332556 36.051000 201.000000 127.332556 36.051000 208.000000 
 127.332667 36.051000 195.000000 127.332667 36.051000 203.000000 
 127.332667 36.051111 197.000000 127.332667 36.051111 200.000000 
 127.332667 36.051222 195.000000 127.332667 36.051222 196.000000 
 127.332778 36.051222 190.000000 127.332778 36.051222 191.000000 
 127.332778 36.051333 187.000000 127.332778 36.051333 184.000000 
 127.332778 36.051444 180.000000 127.332778 36.051444 179.000000 
 127.332889 36.051444 175.000000 127.332889 36.051444 174.000000 
 127.332889 36.051556 172.000000 127.332889 36.051556 171.000000 
 127.332889 36.051667 168.000000 127.332889 36.051667 168.000000 
 127.332889 36.051778 163.000000 127.332889 36.051778 163.000000 
 127.333000 36.051778 159.000000 127.333000 36.051778 157.000000 
 127.333000 36.051889 155.000000 127.333000 36.051889 155.000000 
 127.333000 36.052000 155.000000 127.333000 36.052000 155.000000 
 127.333111 36.052000 155.000000 127.333111 36.052000 155.000000 
 127.333111 36.052111 158.000000 127.333111 36.052111 157.000000 
 127.333111 36.052222 161.000000 127.333111 36.052222 159.000000 
 127.333222 36.052222 166.000000 127.333222 36.052222 164.000000 
 127.333222 36.052333 169.000000 127.333222 36.052333 164.000000 
 127.333222 36.052444 170.000000 127.333222 36.052444 164.000000 
 127.333333 36.052444 178.000000 127.333333 36.052444 170.000000 
 127.333333 36.052556 178.000000 127.333333 36.052556 170.000000 
 127.333333 36.052667 177.000000 127.333333 36.052667 168.000000 
 127.333444 36.052667 185.000000 127.333444 36.052667 174.000000 
 127.333444 36.052778 181.000000 127.333444 36.052778 169.000000 
 127.333444 36.052889 174.000000 127.333444 36.052889 165.000000 
 127.333556 36.052889 181.000000 127.333556 36.052889 170.000000 
 127.333556 36.053000 175.000000 127.333556 36.053000 165.000000 
 127.333556 36.053111 169.000000 127.333556 36.053111 161.000000 
 127.333556 36.053222 166.000000 127.333556 36.053222 156.000000 
 127.333667 36.053222 170.000000 127.333667 36.053222 161.000000 
 127.333667 36.053333 165.000000 127.333667 36.053333 158.000000 
 127.333667 36.053444 163.000000 127.333667 36.053444 155.000000 
 127.333778 36.053444 168.000000 127.333778 36.053444 160.000000 
 127.333778 36.053556 165.000000 127.333778 36.053556 159.000000 
 127.333778 36.053667 164.000000 127.333778 36.053667 157.000000 
 127.333889 36.053667 169.000000 127.333889 36.053667 163.000000 
 127.333889 36.053778 169.000000 127.333889 36.053778 163.000000 
 127.333889 36.053889 170.000000 127.333889 36.053889 166.000000 
 127.334000 36.053889 177.000000 127.334000 36.053889 172.000000 
 127.334000 36.054000 179.000000 127.334000 36.054000 175.000000 
 127.334000 36.054111 182.000000 127.334000 36.054111 181.000000 
 127.334111 36.054111 189.000000 127.334111 36.054111 187.000000 
 127.334111 36.054222 193.000000 127.334111 36.054222 191.000000 
 127.334111 36.054333 196.000000 127.334111 36.054333 197.000000 
 127.334111 36.054444 203.000000 127.334111 36.054444 205.000000 
 127.334222 36.054444 211.000000 127.334222 36.054444 212.000000 
 127.334222 36.054556 219.000000 127.334222 36.054556 222.000000 
 127.334222 36.054667 227.000000 127.334222 36.054667 235.000000 
 127.334333 36.054667 234.000000 127.334333 36.054667 238.000000 
 127.334333 36.054778 243.000000 127.334333 36.054778 240.000000 
 127.334333 36.054889 243.000000 127.334333 36.054889 236.000000 
 127.334444 36.054889 247.000000 127.334444 36.054889 239.000000 
 127.334444 36.055000 241.000000 127.334444 36.055000 233.000000 
 127.334444 36.055111 236.000000 127.334444 36.055111 224.000000 
 127.334556 36.055111 240.000000 127.334556 36.055111 226.000000 
 127.334556 36.055222 230.000000 127.334556 36.055222 220.000000 
 127.334556 36.055333 222.000000 127.334556 36.055333 211.000000 
 127.334667 36.055333 225.000000 127.334667 36.055333 214.000000 
 127.334667 36.055444 216.000000 127.334667 36.055444 210.000000 
 127.334667 36.055556 212.000000 127.334667 36.055556 211.000000 
 127.334667 36.055667 216.000000 127.334667 36.055667 216.000000 
 127.334778 36.055667 221.000000 127.334778 36.055667 222.000000 
 127.334778 36.055778 227.000000 127.334778 36.055778 227.000000 
 127.334778 36.055889 233.000000 127.334778 36.055889 228.000000 
 127.334889 36.055889 239.000000 127.334889 36.055889 235.000000 
 127.334889 36.056000 242.000000 127.334889 36.056000 237.000000 
 127.334889 36.056111 245.000000 127.334889 36.056111 236.000000 
 127.335000 36.056111 252.000000 127.335000 36.056111 245.000000 
 127.335000 36.056222 253.000000 127.335000 36.056222 244.000000 
 127.335000 36.056333 251.000000 127.335000 36.056333 241.000000 
 127.335111 36.056333 258.000000 127.335111 36.056333 249.000000 
 127.335111 36.056444 256.000000 127.335111 36.056444 247.000000 
 127.335111 36.056556 255.000000 127.335111 36.056556 250.000000 
 127.335222 36.056556 263.000000 127.335222 36.056556 255.000000 
 127.335222 36.056667 261.000000 127.335222 36.056667 261.000000 
 127.335222 36.056778 265.000000 127.335222 36.056778 270.000000 
 127.335333 36.056778 270.000000 127.335333 36.056778 275.000000 
 127.335333 36.056889 279.000000 127.335333 36.056889 282.000000 
 127.335333 36.057000 286.000000 127.335333 36.057000 293.000000 
 127.335333 36.057111 297.000000 127.335333 36.057111 299.000000 
 127.335444 36.057111 301.000000 127.335444 36.057111 304.000000 
 127.335444 36.057222 307.000000 127.335444 36.057222 313.000000 
 127.335444 36.057333 317.000000 127.335444 36.057333 320.000000 
 127.335556 36.057333 320.000000 127.335556 36.057333 324.000000 
 127.335556 36.057444 327.000000 127.335556 36.057444 337.000000 
 127.335556 36.057556 341.000000 127.335556 36.057556 341.000000 
 127.335667 36.057556 344.000000 127.335667 36.057556 347.000000 
 127.335667 36.057667 351.000000 127.335667 36.057667 345.000000 
 127.335667 36.057778 354.000000 127.335667 36.057778 341.000000 
 127.335778 36.057778 360.000000 127.335778 36.057778 350.000000 
 127.335778 36.057889 358.000000 127.335778 36.057889 344.000000 
 127.335778 36.058000 352.000000 127.335778 36.058000 340.000000 
 127.335889 36.058000 361.000000 127.335889 36.058000 348.000000 
 127.335889 36.058111 358.000000 127.335889 36.058111 345.000000 
 127.335889 36.058222 354.000000 127.335889 36.058222 343.000000 
 127.336000 36.058222 365.000000 127.336000 36.058222 353.000000 
 127.336000 36.058333 364.000000 127.336000 36.058333 353.000000 
 127.336000 36.058444 364.000000 127.336000 36.058444 353.000000 
 127.336000 36.058556 363.000000 127.336000 36.058556 352.000000 
 127.336111 36.058556 374.000000 127.336111 36.058556 362.000000 
 127.336111 36.058667 373.000000 127.336111 36.058667 361.000000 
 127.336111 36.058778 373.000000 127.336111 36.058778 362.000000 
 127.336222 36.058778 385.000000 127.336222 36.058778 374.000000 
 127.336222 36.058889 386.000000 127.336222 36.058889 379.000000 
 127.336222 36.059000 391.000000 127.336222 36.059000 384.000000 
 127.336333 36.059000 402.000000 127.336333 36.059000 396.000000 
 127.336333 36.059111 404.000000 127.336333 36.059111 399.000000 
 127.336333 36.059222 401.000000 127.336333 36.059222 394.000000 
 127.336444 36.059222 399.000000 127.336444 36.059222 392.000000 
 127.336444 36.059333 387.000000 127.336444 36.059333 379.000000 
 127.336444 36.059444 374.000000 127.336444 36.059444 369.000000 
 127.336556 36.059444 368.000000 127.336556 36.059444 365.000000 
 127.336556 36.059556 361.000000 127.336556 36.059556 350.000000 
 127.336556 36.059667 347.000000 127.336556 36.059667 341.000000 
 127.336667 36.059778 336.000000 127.336667 36.059778 330.000000 
 127.336667 36.059889 322.000000 127.336667 36.059889 319.000000 
 127.336667 36.060000 316.000000 127.336667 36.060000 312.000000 
 127.336778 36.060000 314.000000 127.336778 36.060000 309.000000 
 127.336778 36.060111 307.000000 127.336778 36.060111 299.000000 
 127.336778 36.060222 296.000000 127.336778 36.060222 292.000000 
 127.336889 36.060222 300.000000 127.336889 36.060222 289.000000 
 127.336889 36.060333 292.000000 127.336889 36.060333 278.000000 
 127.336889 36.060444 279.000000 127.336889 36.060444 271.000000 
 127.337000 36.060444 283.000000 127.337000 36.060444 271.000000 
 127.337000 36.060556 273.000000 127.337000 36.060556 260.000000 
 127.337000 36.060667 264.000000 127.337000 36.060667 254.000000 
 127.337111 36.060667 270.000000 127.337111 36.060667 258.000000 
 127.337111 36.060778 265.000000 127.337111 36.060778 251.000000 
 127.337111 36.060889 260.000000 127.337111 36.060889 249.000000 
 127.337222 36.060889 269.000000 127.337222 36.060889 258.000000 
 127.337222 36.061000 268.000000 127.337222 36.061000 257.000000 
 127.337222 36.061111 267.000000 127.337222 36.061111 256.000000 
 127.337333 36.061222 276.000000 127.337333 36.061222 265.000000 
 127.337333 36.061333 276.000000 127.337333 36.061333 263.000000 
 127.337333 36.061444 274.000000 127.337333 36.061444 261.000000 
 127.337444 36.061444 284.000000 127.337444 36.061444 270.000000 
 127.337444 36.061556 279.000000 127.337444 36.061556 268.000000 
 127.337444 36.061667 277.000000 127.337444 36.061667 267.000000 
 127.337556 36.061667 285.000000 127.337556 36.061667 275.000000 
 127.337556 36.061778 283.000000 127.337556 36.061778 276.000000 
 127.337556 36.061889 283.000000 127.337556 36.061889 278.000000 
 127.337667 36.061889 289.000000 127.337667 36.061889 284.000000 
 127.337667 36.062000 290.000000 127.337667 36.062000 290.000000 
 127.337667 36.062111 294.000000 127.337667 36.062111 297.000000 
 127.337778 36.062111 292.000000 127.337778 36.062111 298.000000 
 127.337778 36.062222 295.000000 127.337778 36.062222 300.000000 
 127.337778 36.062333 294.000000 127.337778 36.062333 298.000000 
 127.337889 36.062333 285.000000 127.337889 36.062333 292.000000 
 127.337889 36.062444 284.000000 127.337889 36.062444 286.000000 
 127.337889 36.062556 278.000000 127.337889 36.062556 281.000000 
 127.338000 36.062556 272.000000 127.338000 36.062556 274.000000 
 127.338000 36.062667 268.000000 127.338000 36.062667 269.000000 
 127.338000 36.062778 264.000000 127.338000 36.062778 266.000000 
 127.338000 36.062889 262.000000 127.338000 36.062889 257.000000 
 127.338111 36.062889 256.000000 127.338111 36.062889 254.000000 
 127.338111 36.063000 251.000000 127.338111 36.063000 246.000000 
 127.338111 36.063111 242.000000 127.338111 36.063111 232.000000 
 127.338222 36.063111 237.000000 127.338222 36.063111 228.000000 
 127.338222 36.063222 224.000000 127.338222 36.063222 220.000000 
 127.338222 36.063333 217.000000 127.338222 36.063333 212.000000 
 127.338333 36.063333 214.000000 127.338333 36.063333 205.000000 
 127.338333 36.063444 204.000000 127.338333 36.063444 198.000000 
 127.338333 36.063556 197.000000 127.338333 36.063556 192.000000 
 127.338444 36.063556 196.000000 127.338444 36.063556 191.000000 
 127.338444 36.063667 190.000000 127.338444 36.063667 182.000000 
 127.338444 36.063778 182.000000 127.338444 36.063778 177.000000 
 127.338556 36.063778 182.000000 127.338556 36.063778 177.000000 
 127.338556 36.063889 176.000000 127.338556 36.063889 169.000000 
 127.338556 36.064000 169.000000 127.338556 36.064000 165.000000 
 127.338667 36.064000 168.000000 127.338667 36.064000 164.000000 
 127.338667 36.064111 164.000000 127.338667 36.064111 160.000000 
 127.338667 36.064222 159.000000 127.338667 36.064222 156.000000 
 127.338667 36.064333 156.000000 127.338667 36.064333 151.000000 
 127.338778 36.064333 155.000000 127.338778 36.064333 151.000000 
 127.338778 36.064444 151.000000 127.338778 36.064444 149.000000 
 127.338778 36.064556 149.000000 127.338778 36.064556 146.000000 
 127.338889 36.064556 149.000000 127.338889 36.064556 146.000000 
 127.338889 36.064667 146.000000 127.338889 36.064667 145.000000 
 127.338889 36.064778 145.000000 127.338889 36.064778 143.000000 
 127.339000 36.064778 145.000000 127.339000 36.064778 144.000000 
 127.339000 36.064889 144.000000 127.339000 36.064889 143.000000 
 127.339000 36.065000 143.000000 127.339000 36.065000 141.000000 
 127.339111 36.065000 143.000000 127.339111 36.065000 141.000000 
 127.339111 36.065111 142.000000 127.339111 36.065111 140.000000 
 127.339111 36.065222 141.000000 127.339111 36.065222 139.000000 
 127.339222 36.065222 141.000000 127.339222 36.065222 140.000000 
 127.339222 36.065333 140.000000 127.339222 36.065333 138.000000 
 127.339222 36.065444 139.000000 127.339222 36.065444 138.000000 
 127.339333 36.065444 139.000000 127.339333 36.065444 138.000000 
 127.339333 36.065556 138.000000 127.339333 36.065556 137.000000 
 127.339333 36.065667 138.000000 127.339333 36.065667 137.000000 
 127.339333 36.065778 138.000000 127.339333 36.065778 138.000000 
 127.339444 36.065778 138.000000 127.339444 36.065778 138.000000 
 127.339444 36.065889 138.000000 127.339444 36.065889 138.000000 
 127.339444 36.066000 139.000000 127.339444 36.066000 139.000000 
 127.339556 36.066000 139.000000 127.339556 36.066000 139.000000 
 127.339556 36.066111 139.000000 127.339556 36.066111 139.000000 
 127.339556 36.066222 139.000000 127.339556 36.066222 139.000000 
 127.339667 36.066222 139.000000 127.339667 36.066222 139.000000 
 127.339667 36.066333 139.000000 127.339667 36.066333 144.000000 
 127.339667 36.066444 143.000000 127.339667 36.066444 154.000000 
 127.339778 36.066444 142.000000 127.339778 36.066444 153.000000 
 127.339778 36.066556 152.000000 127.339778 36.066556 159.000000 
 127.339778 36.066667 158.000000 127.339778 36.066667 165.000000 
 127.339889 36.066667 152.000000 127.339889 36.066667 162.000000 
 127.339889 36.066778 155.000000 127.339889 36.066778 164.000000 
 127.339889 36.066889 157.000000 127.339889 36.066889 166.000000 
 127.340000 36.066889 150.000000 127.340000 36.066889 160.000000 
 127.340000 36.067000 153.000000 127.340000 36.067000 162.000000 
 127.340000 36.067111 154.000000 127.340000 36.067111 163.000000 
 127.340111 36.067222 150.000000 127.340111 36.067222 160.000000 
 127.340111 36.067333 153.000000 127.340111 36.067333 163.000000 
 127.340111 36.067444 156.000000 127.340111 36.067444 171.000000 
 127.340222 36.067444 149.000000 127.340222 36.067444 163.000000 
 127.340222 36.067556 154.000000 127.340222 36.067556 165.000000 
 127.340222 36.067667 155.000000 127.340222 36.067667 162.000000 
 127.340333 36.067667 147.000000 127.340333 36.067667 154.000000 
 127.340333 36.067778 148.000000 127.340333 36.067778 153.000000 
 127.340333 36.067889 150.000000 127.340333 36.067889 157.000000 
 127.340444 36.067889 147.000000 127.340444 36.067889 155.000000 
 127.340444 36.068000 151.000000 127.340444 36.068000 159.000000 
 127.340444 36.068111 153.000000 127.340444 36.068111 167.000000 
 127.340556 36.068111 148.000000 127.340556 36.068111 159.000000 
 127.340556 36.068222 152.000000 127.340556 36.068222 163.000000 
 127.340556 36.068333 156.000000 127.340556 36.068333 167.000000 
 127.340667 36.068333 149.000000 127.340667 36.068333 160.000000 
 127.340667 36.068444 155.000000 127.340667 36.068444 163.000000 
 127.340667 36.068556 157.000000 127.340667 36.068556 165.000000 
 127.340778 36.068556 152.000000 127.340778 36.068556 160.000000 
 127.340778 36.068667 156.000000 127.340778 36.068667 162.000000 
 127.340778 36.068778 158.000000 127.340778 36.068778 163.000000 
 127.340778 36.068889 158.000000 127.340778 36.068889 161.000000 
 127.340889 36.068889 153.000000 127.340889 36.068889 156.000000 
 127.340889 36.069000 151.000000 127.340889 36.069000 158.000000 
 127.340889 36.069111 153.000000 127.340889 36.069111 162.000000 
 127.341000 36.069111 150.000000 127.341000 36.069111 157.000000 
 127.341000 36.069222 153.000000 127.341000 36.069222 160.000000 
 127.341000 36.069333 155.000000 127.341000 36.069333 164.000000 
 127.341111 36.069333 152.000000 127.341111 36.069333 159.000000 
 127.341111 36.069444 156.000000 127.341111 36.069444 161.000000 
 127.341111 36.069556 158.000000 127.341111 36.069556 161.000000 
 127.341222 36.069556 155.000000 127.341222 36.069556 159.000000 
 127.341222 36.069667 156.000000 127.341222 36.069667 162.000000 
 127.341222 36.069778 159.000000 127.341222 36.069778 168.000000 
 127.341333 36.069778 155.000000 127.341333 36.069778 164.000000 
 127.341333 36.069889 159.000000 127.341333 36.069889 165.000000 
 127.341333 36.070000 159.000000 127.341333 36.070000 167.000000 
 127.341444 36.070000 155.000000 127.341444 36.070000 160.000000 
 127.341444 36.070111 155.000000 127.341444 36.070111 162.000000 
 127.341444 36.070222 157.000000 127.341444 36.070222 166.000000 
 127.341444 36.070333 161.000000 127.341444 36.070333 170.000000 
 127.341556 36.070333 158.000000 127.341556 36.070333 165.000000 
 127.341556 36.070444 160.000000 127.341556 36.070444 171.000000 
 127.341556 36.070556 166.000000 127.341556 36.070556 175.000000 
 127.341667 36.070556 161.000000 127.341667 36.070556 169.000000 
 127.341667 36.070667 165.000000 127.341667 36.070667 170.000000 
 127.341667 36.070778 166.000000 127.341667 36.070778 168.000000 
 127.341778 36.070778 162.000000 127.341778 36.070778 164.000000 
 127.341778 36.070889 161.000000 127.341778 36.070889 161.000000 
 127.341778 36.071000 160.000000 127.341778 36.071000 162.000000 
 127.341889 36.071000 160.000000 127.341889 36.071000 160.000000 
 127.341889 36.071111 160.000000 127.341889 36.071111 160.000000 
 127.341889 36.071222 160.000000 127.341889 36.071222 161.000000 
 127.342000 36.071222 163.000000 127.342000 36.071222 162.000000 
 127.342000 36.071333 165.000000 127.342000 36.071333 164.000000 
 127.342000 36.071444 166.000000 127.342000 36.071444 165.000000 
 127.342111 36.071444 169.000000 127.342111 36.071444 167.000000 
 127.342111 36.071556 169.000000 127.342111 36.071556 167.000000 
 127.342111 36.071667 170.000000 127.342111 36.071667 169.000000 
 127.342111 36.071778 171.000000 127.342111 36.071778 170.000000 
 127.342222 36.071778 175.000000 127.342222 36.071778 172.000000 
 127.342222 36.071889 176.000000 127.342222 36.071889 172.000000 
 127.342222 36.072000 176.000000 127.342222 36.072000 170.000000 
 127.342333 36.072000 180.000000 127.342333 36.072000 173.000000 
 127.342333 36.072111 180.000000 127.342333 36.072111 175.000000 
 127.342333 36.072222 175.000000 127.342333 36.072222 175.000000 
 127.342444 36.072222 180.000000 127.342444 36.072222 175.000000 
 127.342444 36.072333 176.000000 127.342444 36.072333 175.000000 
 127.342444 36.072444 175.000000 127.342444 36.072444 176.000000 
 127.342556 36.072444 175.000000 127.342556 36.072444 176.000000 
 127.342556 36.072556 176.000000 127.342556 36.072556 178.000000 
 127.342556 36.072667 178.000000 127.342556 36.072667 183.000000 
 127.342667 36.072667 178.000000 127.342667 36.072667 184.000000 
 127.342667 36.072778 184.000000 127.342667 36.072778 188.000000 
 127.342667 36.072889 189.000000 127.342667 36.072889 195.000000 
 127.342778 36.072889 190.000000 127.342778 36.072889 196.000000 
 127.342778 36.073000 198.000000 127.342778 36.073000 202.000000 
 127.342778 36.073111 205.000000 127.342778 36.073111 213.000000 
 127.342778 36.073222 218.000000 127.342778 36.073222 221.000000 
 127.342889 36.073222 223.000000 127.342889 36.073222 225.000000 
 127.342889 36.073333 228.000000 127.342889 36.073333 232.000000 
 127.342889 36.073444 235.000000 127.342889 36.073444 235.000000 
 127.343000 36.073444 239.000000 127.343000 36.073444 240.000000 
 127.343000 36.073556 244.000000 127.343000 36.073556 242.000000 
 127.343000 36.073667 248.000000 127.343000 36.073667 242.000000 
 127.343111 36.073667 253.000000 127.343111 36.073667 248.000000 
 127.343111 36.073778 254.000000 127.343111 36.073778 247.000000 
 127.343111 36.073889 254.000000 127.343111 36.073889 246.000000 
 127.343222 36.073889 261.000000 127.343222 36.073889 253.000000 
 127.343222 36.074000 261.000000 127.343222 36.074000 254.000000 
 127.343222 36.074111 262.000000 127.343222 36.074111 258.000000 
 127.343333 36.074111 270.000000 127.343333 36.074111 264.000000 
 127.343333 36.074222 271.000000 127.343333 36.074222 267.000000 
 127.343333 36.074333 274.000000 127.343333 36.074333 273.000000 
 127.343444 36.074333 282.000000 127.343444 36.074333 280.000000 
 127.343444 36.074444 286.000000 127.343444 36.074444 284.000000 
 127.343444 36.074556 290.000000 127.343444 36.074556 292.000000 
 127.343444 36.074667 296.000000 127.343444 36.074667 298.000000 
 127.343556 36.074667 298.000000 127.343556 36.074667 301.000000 
 127.343556 36.074778 301.000000 127.343556 36.074778 305.000000 
 127.343556 36.074889 307.000000 127.343556 36.074889 308.000000 
 127.343667 36.074889 307.000000 127.343667 36.074889 310.000000 
 127.343667 36.075000 310.000000 127.343667 36.075000 315.000000 
 127.343667 36.075111 316.000000 127.343667 36.075111 317.000000 
 127.343778 36.075111 316.000000 127.343778 36.075111 319.000000 
 127.343778 36.075222 319.000000 127.343778 36.075222 324.000000 
 127.343778 36.075333 325.000000 127.343778 36.075333 326.000000 
 127.343889 36.075333 325.000000 127.343889 36.075333 328.000000 
 127.343889 36.075444 327.000000 127.343889 36.075444 331.000000 
 127.343889 36.075556 332.000000 127.343889 36.075556 334.000000 
 127.344000 36.075556 330.000000 127.344000 36.075556 335.000000 
 127.344000 36.075667 332.000000 127.344000 36.075667 340.000000 
 127.344000 36.075778 337.000000 127.344000 36.075778 341.000000 
 127.344000 36.075889 339.000000 127.344000 36.075889 343.000000 
 127.344111 36.075889 336.000000 127.344111 36.075889 342.000000 
 127.344111 36.076000 340.000000 127.344111 36.076000 345.000000 
 127.344111 36.076111 343.000000 127.344111 36.076111 349.000000 
 127.344222 36.076111 340.000000 127.344222 36.076111 345.000000 
 127.344222 36.076222 343.000000 127.344222 36.076222 350.000000 
 127.344222 36.076333 348.000000 127.344222 36.076333 350.000000 
 127.344333 36.076333 346.000000 127.344333 36.076333 350.000000 
 127.344333 36.076444 348.000000 127.344333 36.076444 349.000000 
 127.344333 36.076556 349.000000 127.344333 36.076556 346.000000 
 127.344444 36.076556 347.000000 127.344444 36.076556 347.000000 
 127.344444 36.076667 346.000000 127.344444 36.076667 341.000000 
 127.344444 36.076778 343.000000 127.344444 36.076778 337.000000 
 127.344556 36.076778 342.000000 127.344556 36.076778 338.000000 
 127.344556 36.076889 340.000000 127.344556 36.076889 332.000000 
 127.344556 36.077000 332.000000 127.344556 36.077000 327.000000 
 127.344667 36.077000 334.000000 127.344667 36.077000 327.000000 
 127.344667 36.077111 329.000000 127.344667 36.077111 319.000000 
 127.344667 36.077222 320.000000 127.344667 36.077222 314.000000 
 127.344667 36.077333 316.000000 127.344667 36.077333 308.000000 
 127.344778 36.077333 321.000000 127.344778 36.077333 313.000000 
 127.344778 36.077444 320.000000 127.344778 36.077444 314.000000 
 127.344778 36.077556 321.000000 127.344778 36.077556 316.000000 
 127.344889 36.077556 328.000000 127.344889 36.077556 322.000000 
 127.344889 36.077667 329.000000 127.344889 36.077667 323.000000 
 127.344889 36.077778 329.000000 127.344889 36.077778 324.000000 
 127.345000 36.077778 335.000000 127.345000 36.077778 330.000000 
 127.345000 36.077889 335.000000 127.345000 36.077889 332.000000 
 127.345000 36.078000 337.000000 127.345000 36.078000 334.000000 
 127.345111 36.078000 342.000000 127.345111 36.078000 339.000000 
 127.345111 36.078111 344.000000 127.345111 36.078111 342.000000 
 127.345111 36.078222 347.000000 127.345111 36.078222 344.000000 
 127.345222 36.078222 352.000000 127.345222 36.078222 349.000000 
 127.345222 36.078333 354.000000 127.345222 36.078333 352.000000 
 127.345222 36.078444 356.000000 127.345222 36.078444 353.000000 
 127.345222 36.078556 355.000000 127.345222 36.078556 350.000000 
 127.345333 36.078556 356.000000 127.345333 36.078556 351.000000 
 127.345333 36.078667 352.000000 127.345333 36.078667 348.000000 
 127.345333 36.078778 348.000000 127.345333 36.078778 343.000000 
 127.345444 36.078778 349.000000 127.345444 36.078778 344.000000 
 127.345444 36.078889 345.000000 127.345444 36.078889 342.000000 
 127.345444 36.079000 344.000000 127.345444 36.079000 341.000000 
 127.345556 36.079000 345.000000 127.345556 36.079000 343.000000 
 127.345556 36.079111 345.000000 127.345556 36.079111 343.000000 
 127.345556 36.079222 345.000000 127.345556 36.079222 342.000000 
 127.345667 36.079222 345.000000 127.345667 36.079222 345.000000 
 127.345667 36.079333 345.000000 127.345667 36.079333 344.000000 
 127.345667 36.079444 345.000000 127.345667 36.079444 342.000000 
 127.345667 36.079556 343.000000 127.345667 36.079556 342.000000 
 127.345778 36.079556 341.000000 127.345778 36.079556 343.000000 
 127.345778 36.079667 340.000000 127.345778 36.079667 343.000000 
 127.345778 36.079778 340.000000 127.345778 36.079778 340.000000 
 127.345889 36.079778 334.000000 127.345889 36.079778 340.000000 
 127.345889 36.079889 332.000000 127.345889 36.079889 339.000000 
 127.345889 36.080000 331.000000 127.345889 36.080000 336.000000 
 127.346000 36.080000 325.000000 127.346000 36.080000 329.000000 
 127.346000 36.080111 323.000000 127.346000 36.080111 327.000000 
 127.346000 36.080222 321.000000 127.346000 36.080222 324.000000 
 127.346000 36.080333 317.000000 127.346000 36.080333 321.000000 
 127.346111 36.080333 311.000000 127.346111 36.080333 314.000000 
 127.346111 36.080444 307.000000 127.346111 36.080444 309.000000 
 127.346111 36.080556 301.000000 127.346111 36.080556 308.000000 
 127.346222 36.080556 295.000000 127.346222 36.080556 300.000000 
 127.346222 36.080667 294.000000 127.346222 36.080667 300.000000 
 127.346222 36.080778 293.000000 127.346222 36.080778 299.000000 
 127.346333 36.080778 287.000000 127.346333 36.080778 293.000000 
 127.346333 36.080889 286.000000 127.346333 36.080889 291.000000 
 127.346333 36.081000 285.000000 127.346333 36.081000 289.000000 
 127.346333 36.081111 283.000000 127.346333 36.081111 286.000000 
 127.346444 36.081111 277.000000 127.346444 36.081111 280.000000 
 
