# Supplementary material for: Terrain Referenced Navigation Using a Multilayer Radial Basis Function-Based Extreme Learning Machine
Source: Hindawi journal article supplement (doi:10.1155/2019/9142694), 2019-07-11
Supplement: f1 [file 9142694.f1.zip › 9142694_Supplementary information files/CompareMatchingResults_180909/BLTrainResult.dat]

127.173333 35.703000 353.000000 127.173333 35.703000 348.000000 
 127.173444 35.703000 355.000000 127.173444 35.703000 350.000000 
 127.173556 35.703000 359.000000 127.173556 35.703000 353.000000 
 127.173667 35.703000 362.000000 127.173667 35.703000 357.000000 
 127.173889 35.703000 373.000000 127.173889 35.703000 366.000000 
 127.174111 35.703000 382.000000 127.174111 35.703000 377.000000 
 127.174222 35.703000 387.000000 127.174222 35.703000 381.000000 
 127.174333 35.703000 391.000000 127.174333 35.703000 386.000000 
 127.174444 35.703000 396.000000 127.174444 35.703000 390.000000 
 127.173444 35.703222 351.000000 127.173444 35.703222 347.000000 
 127.173556 35.703222 354.000000 127.173556 35.703222 349.000000 
 127.173667 35.703222 359.000000 127.173667 35.703222 353.000000 
 127.173778 35.703222 364.000000 127.173778 35.703222 358.000000 
 127.174000 35.703222 376.000000 127.174000 35.703222 369.000000 
 127.174222 35.703222 384.000000 127.174222 35.703222 379.000000 
 127.174333 35.703222 389.000000 127.174333 35.703222 384.000000 
 127.174444 35.703222 393.000000 127.174444 35.703222 388.000000 
 127.174556 35.703222 398.000000 127.174556 35.703222 392.000000 
 127.173556 35.703444 352.000000 127.173556 35.703444 357.000000 
 127.173667 35.703444 356.000000 127.173667 35.703444 356.000000 
 127.173778 35.703444 362.000000 127.173778 35.703444 356.000000 
 127.173889 35.703444 367.000000 127.173889 35.703444 360.000000 
 127.174111 35.703444 378.000000 127.174111 35.703444 372.000000 
 127.174333 35.703444 387.000000 127.174333 35.703444 381.000000 
 127.174444 35.703444 391.000000 127.174444 35.703444 386.000000 
 127.174556 35.703444 396.000000 127.174556 35.703444 390.000000 
 127.174667 35.703444 400.000000 127.174667 35.703444 395.000000 
 127.173667 35.703778 370.000000 127.173667 35.703778 381.000000 
 127.173778 35.703778 369.000000 127.173778 35.703778 380.000000 
 127.173889 35.703778 368.000000 127.173889 35.703778 379.000000 
 127.174000 35.703778 370.000000 127.174000 35.703778 377.000000 
 127.174222 35.703778 379.000000 127.174222 35.703778 376.000000 
 127.174444 35.703778 389.000000 127.174444 35.703778 384.000000 
 127.174556 35.703778 394.000000 127.174556 35.703778 389.000000 
 127.174667 35.703778 400.000000 127.174667 35.703778 395.000000 
 127.174778 35.703778 402.000000 127.174778 35.703778 400.000000 
 127.173778 35.704000 383.000000 127.173778 35.704000 392.000000 
 127.173889 35.704000 383.000000 127.173889 35.704000 390.000000 
 127.174000 35.704000 382.000000 127.174000 35.704000 389.000000 
 127.174111 35.704000 383.000000 127.174111 35.704000 390.000000 
 127.174333 35.704000 387.000000 127.174333 35.704000 394.000000 
 127.174556 35.704000 397.000000 127.174556 35.704000 398.000000 
 127.174667 35.704000 400.000000 127.174667 35.704000 400.000000 
 127.174778 35.704000 400.000000 127.174778 35.704000 400.000000 
 127.174889 35.704000 400.000000 127.174889 35.704000 400.000000 
 127.173889 35.700556 399.000000 127.173889 35.700556 399.000000 
 127.174000 35.700556 402.000000 127.174000 35.700556 402.000000 
 127.174111 35.700556 405.000000 127.174111 35.700556 405.000000 
 127.174222 35.700556 407.000000 127.174222 35.700556 408.000000 
 127.174444 35.700556 408.000000 127.174444 35.700556 411.000000 
 127.174667 35.700556 403.000000 127.174667 35.700556 408.000000 
 127.174778 35.700556 394.000000 127.174778 35.700556 404.000000 
 127.174889 35.700556 385.000000 127.174889 35.700556 395.000000 
 127.175000 35.700556 377.000000 127.175000 35.700556 386.000000 
 127.173889 35.700667 402.000000 127.173889 35.700667 406.000000 
 127.174000 35.700667 405.000000 127.174000 35.700667 407.000000 
 127.174111 35.700667 408.000000 127.174111 35.700667 410.000000 
 127.174222 35.700667 410.000000 127.174222 35.700667 413.000000 
 127.174444 35.700667 410.000000 127.174444 35.700667 415.000000 
 127.174667 35.700667 404.000000 127.174667 35.700667 409.000000 
 127.174778 35.700667 395.000000 127.174778 35.700667 405.000000 
 127.174889 35.700667 386.000000 127.174889 35.700667 400.000000 
 127.175000 35.700667 381.000000 127.175000 35.700667 390.000000 
 127.173889 35.700778 407.000000 127.173889 35.700778 411.000000 
 127.174000 35.700778 410.000000 127.174000 35.700778 412.000000 
 127.174111 35.700778 413.000000 127.174111 35.700778 413.000000 
 127.174222 35.700778 415.000000 127.174222 35.700778 416.000000 
 127.174444 35.700778 413.000000 127.174444 35.700778 419.000000 
 127.174667 35.700778 405.000000 127.174667 35.700778 410.000000 
 127.174778 35.700778 400.000000 127.174778 35.700778 406.000000 
 127.174889 35.700778 390.000000 127.174889 35.700778 401.000000 
 127.175000 35.700778 388.000000 127.175000 35.700778 395.000000 
 127.174000 35.700778 410.000000 127.174000 35.700778 412.000000 
 127.174111 35.700778 413.000000 127.174111 35.700778 413.000000 
 127.174222 35.700778 415.000000 127.174222 35.700778 416.000000 
 127.174333 35.700778 415.000000 127.174333 35.700778 419.000000 
 127.174556 35.700778 409.000000 127.174556 35.700778 415.000000 
 127.174778 35.700778 400.000000 127.174778 35.700778 406.000000 
 127.174889 35.700778 390.000000 127.174889 35.700778 401.000000 
 127.175000 35.700778 388.000000 127.175000 35.700778 395.000000 
 127.175111 35.700778 388.000000 127.175111 35.700778 393.000000 
 127.174000 35.700889 413.000000 127.174000 35.700889 419.000000 
 127.174111 35.700889 416.000000 127.174111 35.700889 419.000000 
 127.174222 35.700889 419.000000 127.174222 35.700889 421.000000 
 127.174333 35.700889 419.000000 127.174333 35.700889 423.000000 
 127.174556 35.700889 410.000000 127.174556 35.700889 423.000000 
 127.174778 35.700889 401.000000 127.174778 35.700889 413.000000 
 127.174889 35.700889 395.000000 127.174889 35.700889 407.000000 
 127.175000 35.700889 393.000000 127.175000 35.700889 402.000000 
 127.175111 35.700889 394.000000 127.175111 35.700889 401.000000 
 127.174000 35.701000 419.000000 127.174000 35.701000 423.000000 
 127.174111 35.701000 421.000000 127.174111 35.701000 424.000000 
 127.174222 35.701000 423.000000 127.174222 35.701000 425.000000 
 127.174333 35.701000 424.000000 127.174333 35.701000 427.000000 
 127.174556 35.701000 419.000000 127.174556 35.701000 427.000000 
 127.174778 35.701000 407.000000 127.174778 35.701000 420.000000 
 127.174889 35.701000 402.000000 127.174889 35.701000 414.000000 
 127.175000 35.701000 401.000000 127.175000 35.701000 409.000000 
 127.175111 35.701000 401.000000 127.175111 35.701000 403.000000 
 127.174000 35.701111 424.000000 127.174000 35.701111 429.000000 
 127.174111 35.701111 425.000000 127.174111 35.701111 433.000000 
 127.174222 35.701111 427.000000 127.174222 35.701111 433.000000 
 127.174333 35.701111 428.000000 127.174333 35.701111 434.000000 
 127.174556 35.701111 425.000000 127.174556 35.701111 432.000000 
 127.174778 35.701111 414.000000 127.174778 35.701111 424.000000 
 127.174889 35.701111 409.000000 127.174889 35.701111 417.000000 
 127.175000 35.701111 403.000000 127.175000 35.701111 410.000000 
 127.175111 35.701111 401.000000 127.175111 35.701111 401.000000 
 127.174111 35.701111 425.000000 127.174111 35.701111 433.000000 
 127.174222 35.701111 427.000000 127.174222 35.701111 433.000000 
 127.174333 35.701111 428.000000 127.174333 35.701111 434.000000 
 127.174444 35.701111 427.000000 127.174444 35.701111 434.000000 
 127.174667 35.701111 420.000000 127.174667 35.701111 429.000000 
 127.174889 35.701111 409.000000 127.174889 35.701111 417.000000 
 127.175000 35.701111 403.000000 127.175000 35.701111 410.000000 
 127.175111 35.701111 401.000000 127.175111 35.701111 401.000000 
 127.175222 35.701111 400.000000 127.175222 35.701111 398.000000 
 127.174111 35.701222 433.000000 127.174111 35.701222 439.000000 
 127.174222 35.701222 434.000000 127.174222 35.701222 439.000000 
 127.174333 35.701222 434.000000 127.174333 35.701222 438.000000 
 127.174444 35.701222 432.000000 127.174444 35.701222 437.000000 
 127.174667 35.701222 424.000000 127.174667 35.701222 430.000000 
 127.174889 35.701222 410.000000 127.174889 35.701222 417.000000 
 127.175000 35.701222 401.000000 127.175000 35.701222 410.000000 
 127.175111 35.701222 398.000000 127.175111 35.701222 400.000000 
 127.175222 35.701222 396.000000 127.175222 35.701222 395.000000 
 127.174111 35.701333 439.000000 127.174111 35.701333 443.000000 
 127.174222 35.701333 438.000000 127.174222 35.701333 440.000000 
 127.174333 35.701333 437.000000 127.174333 35.701333 440.000000 
 127.174444 35.701333 433.000000 127.174444 35.701333 438.000000 
 127.174667 35.701333 424.000000 127.174667 35.701333 430.000000 
 127.174889 35.701333 410.000000 127.174889 35.701333 416.000000 
 127.175000 35.701333 400.000000 127.175000 35.701333 409.000000 
 127.175111 35.701333 395.000000 127.175111 35.701333 402.000000 
 127.175222 35.701333 392.000000 127.175222 35.701333 394.000000 
 127.174111 35.701444 440.000000 127.174111 35.701444 441.000000 
 127.174222 35.701444 440.000000 127.174222 35.701444 440.000000 
 127.174333 35.701444 438.000000 127.174333 35.701444 439.000000 
 127.174444 35.701444 434.000000 127.174444 35.701444 437.000000 
 127.174667 35.701444 423.000000 127.174667 35.701444 428.000000 
 127.174889 35.701444 409.000000 127.174889 35.701444 415.000000 
 127.175000 35.701444 402.000000 127.175000 35.701444 408.000000 
 127.175111 35.701444 394.000000 127.175111 35.701444 401.000000 
 127.175222 35.701444 389.000000 127.175222 35.701444 392.000000 
 127.174222 35.701444 440.000000 127.174222 35.701444 440.000000 
 127.174333 35.701444 438.000000 127.174333 35.701444 439.000000 
 127.174444 35.701444 434.000000 127.174444 35.701444 437.000000 
 127.174556 35.701444 430.000000 127.174556 35.701444 434.000000 
 127.174778 35.701444 416.000000 127.174778 35.701444 422.000000 
 127.175000 35.701444 402.000000 127.175000 35.701444 408.000000 
 127.175111 35.701444 394.000000 127.175111 35.701444 401.000000 
 127.175222 35.701444 389.000000 127.175222 35.701444 392.000000 
 127.175333 35.701444 385.000000 127.175333 35.701444 386.000000 
 127.174222 35.701556 439.000000 127.174222 35.701556 437.000000 
 127.174333 35.701556 437.000000 127.174333 35.701556 436.000000 
 127.174444 35.701556 434.000000 127.174444 35.701556 435.000000 
 127.174556 35.701556 428.000000 127.174556 35.701556 432.000000 
 127.174778 35.701556 415.000000 127.174778 35.701556 421.000000 
 127.175000 35.701556 401.000000 127.175000 35.701556 407.000000 
 127.175111 35.701556 392.000000 127.175111 35.701556 400.000000 
 127.175222 35.701556 386.000000 127.175222 35.701556 394.000000 
 127.175333 35.701556 382.000000 127.175333 35.701556 386.000000 
 127.174222 35.701667 436.000000 127.174222 35.701667 430.000000 
 127.174333 35.701667 435.000000 127.174333 35.701667 431.000000 
 127.174444 35.701667 432.000000 127.174444 35.701667 431.000000 
 127.174556 35.701667 427.000000 127.174556 35.701667 429.000000 
 127.174778 35.701667 414.000000 127.174778 35.701667 420.000000 
 127.175000 35.701667 400.000000 127.175000 35.701667 406.000000 
 127.175111 35.701667 394.000000 127.175111 35.701667 399.000000 
 127.175222 35.701667 386.000000 127.175222 35.701667 394.000000 
 127.175333 35.701667 380.000000 127.175333 35.701667 386.000000 
 127.174222 35.701778 431.000000 127.174222 35.701778 424.000000 
 127.174333 35.701778 431.000000 127.174333 35.701778 426.000000 
 127.174444 35.701778 429.000000 127.174444 35.701778 426.000000 
 127.174556 35.701778 426.000000 127.174556 35.701778 426.000000 
 127.174778 35.701778 413.000000 127.174778 35.701778 420.000000 
 127.175000 35.701778 399.000000 127.175000 35.701778 407.000000 
 127.175111 35.701778 394.000000 127.175111 35.701778 401.000000 
 127.175222 35.701778 386.000000 127.175222 35.701778 395.000000 
 127.175333 35.701778 380.000000 127.175333 35.701778 387.000000 
 127.174333 35.701889 426.000000 127.174333 35.701889 417.000000 
 127.174444 35.701889 426.000000 127.174444 35.701889 419.000000 
 127.174556 35.701889 424.000000 127.174556 35.701889 420.000000 
 127.174667 35.701889 420.000000 127.174667 35.701889 420.000000 
 127.174889 35.701889 407.000000 127.174889 35.701889 414.000000 
 127.175111 35.701889 395.000000 127.175111 35.701889 402.000000 
 127.175222 35.701889 387.000000 127.175222 35.701889 395.000000 
 127.175333 35.701889 381.000000 127.175333 35.701889 389.000000 
 127.175444 35.701889 376.000000 127.175444 35.701889 380.000000 
 127.174333 35.702000 419.000000 127.174333 35.702000 412.000000 
 127.174444 35.702000 420.000000 127.174444 35.702000 413.000000 
 127.174556 35.702000 420.000000 127.174556 35.702000 415.000000 
 127.174667 35.702000 418.000000 127.174667 35.702000 415.000000 
 127.174889 35.702000 408.000000 127.174889 35.702000 412.000000 
 127.175111 35.702000 395.000000 127.175111 35.702000 401.000000 
 127.175222 35.702000 389.000000 127.175222 35.702000 395.000000 
 127.175333 35.702000 380.000000 127.175333 35.702000 388.000000 
 127.175444 35.702000 375.000000 127.175444 35.702000 379.000000 
 127.174333 35.702111 413.000000 127.174333 35.702111 405.000000 
 127.174444 35.702111 415.000000 127.174444 35.702111 407.000000 
 127.174556 35.702111 415.000000 127.174556 35.702111 408.000000 
 127.174667 35.702111 415.000000 127.174667 35.702111 410.000000 
 127.174889 35.702111 407.000000 127.174889 35.702111 408.000000 
 127.175111 35.702111 395.000000 127.175111 35.702111 398.000000 
 127.175222 35.702111 388.000000 127.175222 35.702111 392.000000 
 127.175333 35.702111 379.000000 127.175333 35.702111 386.000000 
 127.175444 35.702111 373.000000 127.175444 35.702111 380.000000 
 127.174333 35.702222 407.000000 127.174333 35.702222 400.000000 
 127.174444 35.702222 408.000000 127.174444 35.702222 402.000000 
 127.174556 35.702222 410.000000 127.174556 35.702222 405.000000 
 127.174667 35.702222 410.000000 127.174667 35.702222 409.000000 
 127.174889 35.702222 405.000000 127.174889 35.702222 407.000000 
 127.175111 35.702222 392.000000 127.175111 35.702222 396.000000 
 127.175222 35.702222 386.000000 127.175222 35.702222 390.000000 
 127.175333 35.702222 380.000000 127.175333 35.702222 386.000000 
 127.175444 35.702222 374.000000 127.175444 35.702222 383.000000 
 127.174444 35.702222 408.000000 127.174444 35.702222 402.000000 
 127.174556 35.702222 410.000000 127.174556 35.702222 405.000000 
 127.174667 35.702222 410.000000 127.174667 35.702222 409.000000 
 127.174778 35.702222 408.000000 127.174778 35.702222 409.000000 
 127.175000 35.702222 398.000000 127.175000 35.702222 402.000000 
 127.175222 35.702222 386.000000 127.175222 35.702222 390.000000 
 127.175333 35.702222 380.000000 127.175333 35.702222 386.000000 
 127.175444 35.702222 374.000000 127.175444 35.702222 383.000000 
 127.175556 35.702222 373.000000 127.175556 35.702222 379.000000 
 127.174444 35.702333 405.000000 127.174444 35.702333 398.000000 
 127.174556 35.702333 409.000000 127.174556 35.702333 403.000000 
 127.174667 35.702333 409.000000 127.174667 35.702333 406.000000 
 127.174778 35.702333 407.000000 127.174778 35.702333 408.000000 
 127.175000 35.702333 396.000000 127.175000 35.702333 400.000000 
 127.175222 35.702333 386.000000 127.175222 35.702333 394.000000 
 127.175333 35.702333 383.000000 127.175333 35.702333 393.000000 
 127.175444 35.702333 379.000000 127.175444 35.702333 392.000000 
 127.175556 35.702333 377.000000 127.175556 35.702333 388.000000 
 127.174444 35.702444 403.000000 127.174444 35.702444 396.000000 
 127.174556 35.702444 406.000000 127.174556 35.702444 401.000000 
 127.174667 35.702444 408.000000 127.174667 35.702444 405.000000 
 127.174778 35.702444 405.000000 127.174778 35.702444 407.000000 
 127.175000 35.702444 397.000000 127.175000 35.702444 405.000000 
 127.175222 35.702444 393.000000 127.175222 35.702444 401.000000 
 127.175333 35.702444 392.000000 127.175333 35.702444 399.000000 
 127.175444 35.702444 388.000000 127.175444 35.702444 397.000000 
 127.175556 35.702444 385.000000 127.175556 35.702444 394.000000 
 127.174444 35.702556 401.000000 127.174444 35.702556 394.000000 
 127.174556 35.702556 405.000000 127.174556 35.702556 399.000000 
 127.174667 35.702556 407.000000 127.174667 35.702556 403.000000 
 127.174778 35.702556 407.000000 127.174778 35.702556 407.000000 
 127.175000 35.702556 402.000000 127.175000 35.702556 410.000000 
 127.175222 35.702556 399.000000 127.175222 35.702556 409.000000 
 127.175333 35.702556 397.000000 127.175333 35.702556 407.000000 
 127.175444 35.702556 394.000000 127.175444 35.702556 404.000000 
 127.175556 35.702556 390.000000 127.175556 35.702556 401.000000 
 127.174556 35.702556 405.000000 127.174556 35.702556 399.000000 
 127.174667 35.702556 407.000000 127.174667 35.702556 403.000000 
 127.174778 35.702556 407.000000 127.174778 35.702556 407.000000 
 127.174889 35.702556 405.000000 127.174889 35.702556 409.000000 
 127.175111 35.702556 401.000000 127.175111 35.702556 410.000000 
 127.175333 35.702556 397.000000 127.175333 35.702556 407.000000 
 127.175444 35.702556 394.000000 127.175444 35.702556 404.000000 
 127.175556 35.702556 390.000000 127.175556 35.702556 401.000000 
 127.175667 35.702556 387.000000 127.175667 35.702556 396.000000 
 127.174556 35.702667 403.000000 127.174556 35.702667 398.000000 
 127.174667 35.702667 407.000000 127.174667 35.702667 402.000000 
 127.174778 35.702667 409.000000 127.174778 35.702667 406.000000 
 127.174889 35.702667 410.000000 127.174889 35.702667 409.000000 
 127.175111 35.702667 409.000000 127.175111 35.702667 413.000000 
 127.175333 35.702667 404.000000 127.175333 35.702667 412.000000 
 127.175444 35.702667 401.000000 127.175444 35.702667 409.000000 
 127.175556 35.702667 396.000000 127.175556 35.702667 405.000000 
 127.175667 35.702667 394.000000 127.175667 35.702667 402.000000 
 127.174556 35.702778 402.000000 127.174556 35.702778 397.000000 
 127.174667 35.702778 406.000000 127.174667 35.702778 401.000000 
 127.174778 35.702778 409.000000 127.174778 35.702778 405.000000 
 127.174889 35.702778 411.000000 127.174889 35.702778 408.000000 
 127.175111 35.702778 413.000000 127.175111 35.702778 414.000000 
 127.175333 35.702778 409.000000 127.175333 35.702778 416.000000 
 127.175444 35.702778 405.000000 127.175444 35.702778 415.000000 
 127.175556 35.702778 402.000000 127.175556 35.702778 412.000000 
 127.175667 35.702778 398.000000 127.175667 35.702778 409.000000 
 127.174556 35.702889 401.000000 127.174556 35.702889 396.000000 
 127.174667 35.702889 405.000000 127.174667 35.702889 400.000000 
 127.174778 35.702889 408.000000 127.174778 35.702889 404.000000 
 127.174889 35.702889 411.000000 127.174889 35.702889 407.000000 
 127.175111 35.702889 415.000000 127.175111 35.702889 413.000000 
 127.175333 35.702889 415.000000 127.175333 35.702889 416.000000 
 127.175444 35.702889 412.000000 127.175444 35.702889 415.000000 
 127.175556 35.702889 409.000000 127.175556 35.702889 413.000000 
 127.175667 35.702889 404.000000 127.175667 35.702889 410.000000 
 127.174667 35.702889 405.000000 127.174667 35.702889 400.000000 
 127.174778 35.702889 408.000000 127.174778 35.702889 404.000000 
 127.174889 35.702889 411.000000 127.174889 35.702889 407.000000 
 127.175000 35.702889 414.000000 127.175000 35.702889 410.000000 
 127.175222 35.702889 416.000000 127.175222 35.702889 415.000000 
 127.175444 35.702889 412.000000 127.175444 35.702889 415.000000 
 127.175556 35.702889 409.000000 127.175556 35.702889 413.000000 
 127.175667 35.702889 404.000000 127.175667 35.702889 410.000000 
 127.175778 35.702889 404.000000 127.175778 35.702889 405.000000 
 127.174667 35.703000 404.000000 127.174667 35.703000 399.000000 
 127.174778 35.703000 407.000000 127.174778 35.703000 403.000000 
 127.174889 35.703000 410.000000 127.174889 35.703000 407.000000 
 127.175000 35.703000 413.000000 127.175000 35.703000 410.000000 
 127.175222 35.703000 416.000000 127.175222 35.703000 415.000000 
 127.175444 35.703000 413.000000 127.175444 35.703000 414.000000 
 127.175556 35.703000 410.000000 127.175556 35.703000 411.000000 
 127.175667 35.703000 405.000000 127.175667 35.703000 407.000000 
 127.175778 35.703000 405.000000 127.175778 35.703000 406.000000 
 127.174667 35.703111 403.000000 127.174667 35.703111 398.000000 
 127.174778 35.703111 407.000000 127.174778 35.703111 402.000000 
 127.174889 35.703111 410.000000 127.174889 35.703111 406.000000 
 127.175000 35.703111 413.000000 127.175000 35.703111 409.000000 
 127.175222 35.703111 415.000000 127.175222 35.703111 413.000000 
 127.175444 35.703111 411.000000 127.175444 35.703111 408.000000 
 127.175556 35.703111 407.000000 127.175556 35.703111 403.000000 
 127.175667 35.703111 406.000000 127.175667 35.703111 400.000000 
 127.175778 35.703111 405.000000 127.175778 35.703111 399.000000 
 127.174667 35.703222 402.000000 127.174667 35.703222 397.000000 
 127.174778 35.703222 406.000000 127.174778 35.703222 401.000000 
 127.174889 35.703222 409.000000 127.174889 35.703222 405.000000 
 127.175000 35.703222 411.000000 127.175000 35.703222 408.000000 
 127.175222 35.703222 412.000000 127.175222 35.703222 410.000000 
 127.175444 35.703222 403.000000 127.175444 35.703222 405.000000 
 127.175556 35.703222 400.000000 127.175556 35.703222 399.000000 
 127.175667 35.703222 399.000000 127.175667 35.703222 396.000000 
 127.175778 35.703222 400.000000 127.175778 35.703222 393.000000 
 127.174778 35.703222 406.000000 127.174778 35.703222 401.000000 
 127.174889 35.703222 409.000000 127.174889 35.703222 405.000000 
 127.175000 35.703222 411.000000 127.175000 35.703222 408.000000 
 127.175111 35.703222 413.000000 127.175111 35.703222 410.000000 
 127.175333 35.703222 408.000000 127.175333 35.703222 410.000000 
 127.175556 35.703222 400.000000 127.175556 35.703222 399.000000 
 127.175667 35.703222 399.000000 127.175667 35.703222 396.000000 
 127.175778 35.703222 400.000000 127.175778 35.703222 393.000000 
 127.175889 35.703222 400.000000 127.175889 35.703222 392.000000 
 127.174778 35.703333 405.000000 127.174778 35.703333 400.000000 
 127.174889 35.703333 408.000000 127.174889 35.703333 405.000000 
 127.175000 35.703333 410.000000 127.175000 35.703333 407.000000 
 127.175111 35.703333 410.000000 127.175111 35.703333 410.000000 
 127.175333 35.703333 405.000000 127.175333 35.703333 406.000000 
 127.175556 35.703333 396.000000 127.175556 35.703333 394.000000 
 127.175667 35.703333 393.000000 127.175667 35.703333 390.000000 
 127.175778 35.703333 392.000000 127.175778 35.703333 387.000000 
 127.175889 35.703333 394.000000 127.175889 35.703333 384.000000 
 127.174778 35.703444 405.000000 127.174778 35.703444 400.000000 
 127.174889 35.703444 407.000000 127.174889 35.703444 404.000000 
 127.175000 35.703444 410.000000 127.175000 35.703444 407.000000 
 127.175111 35.703444 410.000000 127.175111 35.703444 408.000000 
 127.175333 35.703444 399.000000 127.175333 35.703444 401.000000 
 127.175556 35.703444 390.000000 127.175556 35.703444 391.000000 
 127.175667 35.703444 387.000000 127.175667 35.703444 387.000000 
 127.175778 35.703444 384.000000 127.175778 35.703444 383.000000 
 127.175889 35.703444 383.000000 127.175889 35.703444 380.000000 
 127.174778 35.703556 404.000000 127.174778 35.703556 400.000000 
 127.174889 35.703556 407.000000 127.174889 35.703556 403.000000 
 127.175000 35.703556 408.000000 127.175000 35.703556 405.000000 
 127.175111 35.703556 407.000000 127.175111 35.703556 405.000000 
 127.175333 35.703556 395.000000 127.175333 35.703556 395.000000 
 127.175556 35.703556 387.000000 127.175556 35.703556 386.000000 
 127.175667 35.703556 383.000000 127.175667 35.703556 382.000000 
 127.175778 35.703556 380.000000 127.175778 35.703556 379.000000 
 127.175889 35.703556 376.000000 127.175889 35.703556 375.000000 
 127.174889 35.703556 407.000000 127.174889 35.703556 403.000000 
 127.175000 35.703556 408.000000 127.175000 35.703556 405.000000 
 127.175111 35.703556 407.000000 127.175111 35.703556 405.000000 
 127.175222 35.703556 401.000000 127.175222 35.703556 401.000000 
 127.175444 35.703556 391.000000 127.175444 35.703556 390.000000 
 127.175667 35.703556 383.000000 127.175667 35.703556 382.000000 
 127.175778 35.703556 380.000000 127.175778 35.703556 379.000000 
 127.175889 35.703556 376.000000 127.175889 35.703556 375.000000 
 127.176000 35.703556 374.000000 127.176000 35.703556 372.000000 
 127.174889 35.703667 405.000000 127.174889 35.703667 402.000000 
 127.175000 35.703667 405.000000 127.175000 35.703667 403.000000 
 127.175111 35.703667 401.000000 127.175111 35.703667 401.000000 
 127.175222 35.703667 395.000000 127.175222 35.703667 396.000000 
 127.175444 35.703667 386.000000 127.175444 35.703667 385.000000 
 127.175667 35.703667 379.000000 127.175667 35.703667 378.000000 
 127.175778 35.703667 375.000000 127.175778 35.703667 375.000000 
 127.175889 35.703667 372.000000 127.175889 35.703667 372.000000 
 127.176000 35.703667 367.000000 127.176000 35.703667 369.000000 
 127.174889 35.703778 403.000000 127.174889 35.703778 400.000000 
 127.175000 35.703778 401.000000 127.175000 35.703778 400.000000 
 127.175111 35.703778 396.000000 127.175111 35.703778 396.000000 
 127.175222 35.703778 390.000000 127.175222 35.703778 390.000000 
 127.175444 35.703778 381.000000 127.175444 35.703778 377.000000 
 127.175667 35.703778 375.000000 127.175667 35.703778 371.000000 
 127.175778 35.703778 372.000000 127.175778 35.703778 369.000000 
 127.175889 35.703778 369.000000 127.175889 35.703778 367.000000 
 127.176000 35.703778 364.000000 127.176000 35.703778 364.000000 
 127.174889 35.703889 400.000000 127.174889 35.703889 400.000000 
 127.175000 35.703889 396.000000 127.175000 35.703889 400.000000 
 127.175111 35.703889 390.000000 127.175111 35.703889 394.000000 
 127.175222 35.703889 383.000000 127.175222 35.703889 387.000000 
 127.175444 35.703889 373.000000 127.175444 35.703889 373.000000 
 127.175667 35.703889 369.000000 127.175667 35.703889 367.000000 
 127.175778 35.703889 367.000000 127.175778 35.703889 365.000000 
 127.175889 35.703889 364.000000 127.175889 35.703889 363.000000 
 127.176000 35.703889 361.000000 127.176000 35.703889 361.000000 
 127.175000 35.703889 396.000000 127.175000 35.703889 400.000000 
 127.175111 35.703889 390.000000 127.175111 35.703889 394.000000 
 127.175222 35.703889 383.000000 127.175222 35.703889 387.000000 
 127.175333 35.703889 377.000000 127.175333 35.703889 380.000000 
 127.175556 35.703889 371.000000 127.175556 35.703889 370.000000 
 127.175778 35.703889 367.000000 127.175778 35.703889 365.000000 
 127.175889 35.703889 364.000000 127.175889 35.703889 363.000000 
 127.176000 35.703889 361.000000 127.176000 35.703889 361.000000 
 127.176111 35.703889 356.000000 127.176111 35.703889 358.000000 
 127.175000 35.704000 394.000000 127.175000 35.704000 396.000000 
 127.175111 35.704000 387.000000 127.175111 35.704000 390.000000 
 127.175222 35.704000 380.000000 127.175222 35.704000 383.000000 
 127.175333 35.704000 373.000000 127.175333 35.704000 377.000000 
 127.175556 35.704000 367.000000 127.175556 35.704000 366.000000 
 127.175778 35.704000 363.000000 127.175778 35.704000 359.000000 
 127.175889 35.704000 361.000000 127.175889 35.704000 357.000000 
 127.176000 35.704000 358.000000 127.176000 35.704000 355.000000 
 127.176111 35.704000 354.000000 127.176111 35.704000 353.000000 
 127.175000 35.704111 390.000000 127.175000 35.704111 392.000000 
 127.175111 35.704111 383.000000 127.175111 35.704111 386.000000 
 127.175222 35.704111 377.000000 127.175222 35.704111 380.000000 
 127.175333 35.704111 371.000000 127.175333 35.704111 374.000000 
 127.175556 35.704111 362.000000 127.175556 35.704111 364.000000 
 127.175778 35.704111 357.000000 127.175778 35.704111 355.000000 
 127.175889 35.704111 355.000000 127.175889 35.704111 353.000000 
 127.176000 35.704111 353.000000 127.176000 35.704111 351.000000 
 127.176111 35.704111 348.000000 127.176111 35.704111 348.000000 
 127.175000 35.704222 386.000000 127.175000 35.704222 387.000000 
 127.175111 35.704222 380.000000 127.175111 35.704222 381.000000 
 127.175222 35.704222 374.000000 127.175222 35.704222 375.000000 
 127.175333 35.704222 369.000000 127.175333 35.704222 370.000000 
 127.175556 35.704222 359.000000 127.175556 35.704222 360.000000 
 127.175778 35.704222 353.000000 127.175778 35.704222 350.000000 
 127.175889 35.704222 351.000000 127.175889 35.704222 350.000000 
 127.176000 35.704222 348.000000 127.176000 35.704222 346.000000 
 127.176111 35.704222 345.000000 127.176111 35.704222 345.000000 
 127.175111 35.704222 380.000000 127.175111 35.704222 381.000000 
 127.175222 35.704222 374.000000 127.175222 35.704222 375.000000 
 127.175333 35.704222 369.000000 127.175333 35.704222 370.000000 
 127.175444 35.704222 364.000000 127.175444 35.704222 365.000000 
 127.175667 35.704222 355.000000 127.175667 35.704222 354.000000 
 127.175889 35.704222 351.000000 127.175889 35.704222 350.000000 
 127.176000 35.704222 348.000000 127.176000 35.704222 346.000000 
 127.176111 35.704222 345.000000 127.176111 35.704222 345.000000 
 127.176222 35.704222 341.000000 127.176222 35.704222 343.000000 
 127.175111 35.704333 375.000000 127.175111 35.704333 378.000000 
 127.175222 35.704333 370.000000 127.175222 35.704333 372.000000 
 127.175333 35.704333 365.000000 127.175333 35.704333 368.000000 
 127.175444 35.704333 360.000000 127.175444 35.704333 363.000000 
 127.175667 35.704333 350.000000 127.175667 35.704333 356.000000 
 127.175889 35.704333 346.000000 127.175889 35.704333 353.000000 
 127.176000 35.704333 345.000000 127.176000 35.704333 352.000000 
 127.176111 35.704333 343.000000 127.176111 35.704333 349.000000 
 127.176222 35.704333 339.000000 127.176222 35.704333 347.000000 
 127.175111 35.704444 372.000000 127.175111 35.704444 382.000000 
 127.175222 35.704444 368.000000 127.175222 35.704444 378.000000 
 127.175333 35.704444 363.000000 127.175333 35.704444 374.000000 
 127.175444 35.704444 359.000000 127.175444 35.704444 371.000000 
 127.175667 35.704444 354.000000 127.175667 35.704444 366.000000 
 127.175889 35.704444 352.000000 127.175889 35.704444 363.000000 
 127.176000 35.704444 349.000000 127.176000 35.704444 360.000000 
 127.176111 35.704444 347.000000 127.176111 35.704444 357.000000 
 127.176222 35.704444 344.000000 127.176222 35.704444 353.000000 
 127.175111 35.704556 378.000000 127.175111 35.704556 389.000000 
 127.175222 35.704556 374.000000 127.175222 35.704556 385.000000 
 127.175333 35.704556 371.000000 127.175333 35.704556 382.000000 
 127.175444 35.704556 369.000000 127.175444 35.704556 379.000000 
 127.175667 35.704556 364.000000 127.175667 35.704556 373.000000 
 127.175889 35.704556 360.000000 127.175889 35.704556 368.000000 
 127.176000 35.704556 357.000000 127.176000 35.704556 365.000000 
 127.176111 35.704556 353.000000 127.176111 35.704556 361.000000 
 127.176222 35.704556 349.000000 127.176222 35.704556 357.000000 
 127.175222 35.704556 374.000000 127.175222 35.704556 385.000000 
 127.175333 35.704556 371.000000 127.175333 35.704556 382.000000 
 127.175444 35.704556 369.000000 127.175444 35.704556 379.000000 
 127.175556 35.704556 366.000000 127.175556 35.704556 376.000000 
 127.175778 35.704556 363.000000 127.175778 35.704556 371.000000 
 127.176000 35.704556 357.000000 127.176000 35.704556 365.000000 
 127.176111 35.704556 353.000000 127.176111 35.704556 361.000000 
 127.176222 35.704556 349.000000 127.176222 35.704556 357.000000 
 127.176333 35.704556 342.000000 127.176333 35.704556 353.000000 
 127.175222 35.704667 382.000000 127.175222 35.704667 390.000000 
 127.175333 35.704667 379.000000 127.175333 35.704667 386.000000 
 127.175444 35.704667 376.000000 127.175444 35.704667 385.000000 
 127.175556 35.704667 373.000000 127.175556 35.704667 382.000000 
 127.175778 35.704667 368.000000 127.175778 35.704667 376.000000 
 127.176000 35.704667 361.000000 127.176000 35.704667 369.000000 
 127.176111 35.704667 357.000000 127.176111 35.704667 364.000000 
 127.176222 35.704667 353.000000 127.176222 35.704667 360.000000 
 127.176333 35.704667 345.000000 127.176333 35.704667 355.000000 
 127.175222 35.704778 386.000000 127.175222 35.704778 384.000000 
 127.175333 35.704778 385.000000 127.175333 35.704778 382.000000 
 127.175444 35.704778 382.000000 127.175444 35.704778 381.000000 
 127.175556 35.704778 379.000000 127.175556 35.704778 379.000000 
 127.175778 35.704778 373.000000 127.175778 35.704778 375.000000 
 127.176000 35.704778 364.000000 127.176000 35.704778 369.000000 
 127.176111 35.704778 360.000000 127.176111 35.704778 366.000000 
 127.176222 35.704778 355.000000 127.176222 35.704778 362.000000 
 127.176333 35.704778 351.000000 127.176333 35.704778 357.000000 
 127.175222 35.704889 382.000000 127.175222 35.704889 378.000000 
 127.175333 35.704889 381.000000 127.175333 35.704889 376.000000 
 127.175444 35.704889 379.000000 127.175444 35.704889 374.000000 
 127.175556 35.704889 377.000000 127.175556 35.704889 373.000000 
 127.175778 35.704889 373.000000 127.175778 35.704889 369.000000 
 127.176000 35.704889 366.000000 127.176000 35.704889 365.000000 
 127.176111 35.704889 362.000000 127.176111 35.704889 363.000000 
 127.176222 35.704889 357.000000 127.176222 35.704889 360.000000 
 127.176333 35.704889 353.000000 127.176333 35.704889 356.000000 
 127.175333 35.704889 381.000000 127.175333 35.704889 376.000000 
 127.175444 35.704889 379.000000 127.175444 35.704889 374.000000 
 127.175556 35.704889 377.000000 127.175556 35.704889 373.000000 
 127.175667 35.704889 375.000000 127.175667 35.704889 371.000000 
 127.175889 35.704889 369.000000 127.175889 35.704889 367.000000 
 127.176111 35.704889 362.000000 127.176111 35.704889 363.000000 
 127.176222 35.704889 357.000000 127.176222 35.704889 360.000000 
 127.176333 35.704889 353.000000 127.176333 35.704889 356.000000 
 127.176444 35.704889 345.000000 127.176444 35.704889 352.000000 
 127.175333 35.705000 374.000000 127.175333 35.705000 366.000000 
 127.175444 35.705000 373.000000 127.175444 35.705000 365.000000 
 127.175556 35.705000 371.000000 127.175556 35.705000 363.000000 
 127.175667 35.705000 369.000000 127.175667 35.705000 361.000000 
 127.175889 35.705000 365.000000 127.175889 35.705000 358.000000 
 127.176111 35.705000 360.000000 127.176111 35.705000 355.000000 
 127.176222 35.705000 356.000000 127.176222 35.705000 353.000000 
 127.176333 35.705000 352.000000 127.176333 35.705000 351.000000 
 127.176444 35.705000 348.000000 127.176444 35.705000 348.000000 
 127.175333 35.705111 365.000000 127.175333 35.705111 360.000000 
 127.175444 35.705111 363.000000 127.175444 35.705111 358.000000 
 127.175556 35.705111 361.000000 127.175556 35.705111 356.000000 
 127.175667 35.705111 360.000000 127.175667 35.705111 355.000000 
 127.175889 35.705111 357.000000 127.175889 35.705111 352.000000 
 127.176111 35.705111 353.000000 127.176111 35.705111 349.000000 
 127.176222 35.705111 351.000000 127.176222 35.705111 347.000000 
 127.176333 35.705111 348.000000 127.176333 35.705111 345.000000 
 127.176444 35.705111 345.000000 127.176444 35.705111 343.000000 
 127.175333 35.705222 358.000000 127.175333 35.705222 350.000000 
 127.175444 35.705222 356.000000 127.175444 35.705222 349.000000 
 127.175556 35.705222 355.000000 127.175556 35.705222 347.000000 
 127.175667 35.705222 353.000000 127.175667 35.705222 346.000000 
 127.175889 35.705222 350.000000 127.175889 35.705222 343.000000 
 127.176111 35.705222 347.000000 127.176111 35.705222 340.000000 
 127.176222 35.705222 345.000000 127.176222 35.705222 339.000000 
 127.176333 35.705222 343.000000 127.176333 35.705222 337.000000 
 127.176444 35.705222 341.000000 127.176444 35.705222 335.000000 
 127.175444 35.705222 356.000000 127.175444 35.705222 349.000000 
 127.175556 35.705222 355.000000 127.175556 35.705222 347.000000 
 127.175667 35.705222 353.000000 127.175667 35.705222 346.000000 
 127.175778 35.705222 352.000000 127.175778 35.705222 344.000000 
 127.176000 35.705222 349.000000 127.176000 35.705222 341.000000 
 127.176222 35.705222 345.000000 127.176222 35.705222 339.000000 
 127.176333 35.705222 343.000000 127.176333 35.705222 337.000000 
 127.176444 35.705222 341.000000 127.176444 35.705222 335.000000 
 127.176556 35.705222 335.000000 127.176556 35.705222 333.000000 
 127.175444 35.705333 347.000000 127.175444 35.705333 347.000000 
 127.175556 35.705333 346.000000 127.175556 35.705333 345.000000 
 127.175667 35.705333 344.000000 127.175667 35.705333 343.000000 
 127.175778 35.705333 343.000000 127.175778 35.705333 340.000000 
 127.176000 35.705333 340.000000 127.176000 35.705333 336.000000 
 127.176222 35.705333 337.000000 127.176222 35.705333 333.000000 
 127.176333 35.705333 335.000000 127.176333 35.705333 331.000000 
 127.176444 35.705333 333.000000 127.176444 35.705333 330.000000 
 127.176556 35.705333 331.000000 127.176556 35.705333 328.000000 
 127.175444 35.705444 345.000000 127.175444 35.705444 357.000000 
 127.175556 35.705444 343.000000 127.175556 35.705444 352.000000 
 127.175667 35.705444 340.000000 127.175667 35.705444 349.000000 
 127.175778 35.705444 338.000000 127.175778 35.705444 345.000000 
 127.176000 35.705444 335.000000 127.176000 35.705444 337.000000 
 127.176222 35.705444 331.000000 127.176222 35.705444 330.000000 
 127.176333 35.705444 330.000000 127.176333 35.705444 326.000000 
 127.176444 35.705444 328.000000 127.176444 35.705444 321.000000 
 127.176556 35.705444 327.000000 127.176556 35.705444 318.000000 
 127.175444 35.705556 352.000000 127.175444 35.705556 364.000000 
 127.175556 35.705556 349.000000 127.175556 35.705556 359.000000 
 127.175667 35.705556 345.000000 127.175667 35.705556 355.000000 
 127.175778 35.705556 341.000000 127.175778 35.705556 352.000000 
 127.176000 35.705556 334.000000 127.176000 35.705556 344.000000 
 127.176222 35.705556 326.000000 127.176222 35.705556 335.000000 
 127.176333 35.705556 321.000000 127.176333 35.705556 330.000000 
 127.176444 35.705556 318.000000 127.176444 35.705556 324.000000 
 127.176556 35.705556 317.000000 127.176556 35.705556 320.000000 
 127.175556 35.705556 349.000000 127.175556 35.705556 359.000000 
 127.175667 35.705556 345.000000 127.175667 35.705556 355.000000 
 127.175778 35.705556 341.000000 127.175778 35.705556 352.000000 
 127.175889 35.705556 337.000000 127.175889 35.705556 348.000000 
 127.176111 35.705556 330.000000 127.176111 35.705556 340.000000 
 127.176333 35.705556 321.000000 127.176333 35.705556 330.000000 
 127.176444 35.705556 318.000000 127.176444 35.705556 324.000000 
 127.176556 35.705556 317.000000 127.176556 35.705556 320.000000 
 127.176667 35.705556 316.000000 127.176667 35.705556 315.000000 
 127.175556 35.705667 355.000000 127.175556 35.705667 368.000000 
 127.175667 35.705667 352.000000 127.175667 35.705667 363.000000 
 127.175778 35.705667 348.000000 127.175778 35.705667 359.000000 
 127.175889 35.705667 344.000000 127.175889 35.705667 355.000000 
 127.176111 35.705667 335.000000 127.176111 35.705667 347.000000 
 127.176333 35.705667 324.000000 127.176333 35.705667 336.000000 
 127.176444 35.705667 320.000000 127.176444 35.705667 330.000000 
 127.176556 35.705667 315.000000 127.176556 35.705667 324.000000 
 127.176667 35.705667 310.000000 127.176667 35.705667 320.000000 
 127.175556 35.705778 363.000000 127.175556 35.705778 370.000000 
 127.175667 35.705778 359.000000 127.175667 35.705778 367.000000 
 127.175778 35.705778 355.000000 127.175778 35.705778 362.000000 
 127.175889 35.705778 352.000000 127.175889 35.705778 359.000000 
 127.176111 35.705778 342.000000 127.176111 35.705778 351.000000 
 127.176333 35.705778 330.000000 127.176333 35.705778 339.000000 
 127.176444 35.705778 324.000000 127.176444 35.705778 333.000000 
 127.176556 35.705778 320.000000 127.176556 35.705778 327.000000 
 127.176667 35.705778 315.000000 127.176667 35.705778 322.000000 
 127.175556 35.705889 367.000000 127.175556 35.705889 370.000000 
 127.175667 35.705889 362.000000 127.175667 35.705889 367.000000 
 127.175778 35.705889 359.000000 127.175778 35.705889 363.000000 
 127.175889 35.705889 355.000000 127.175889 35.705889 360.000000 
 127.176111 35.705889 346.000000 127.176111 35.705889 353.000000 
 127.176333 35.705889 333.000000 127.176333 35.705889 342.000000 
 127.176444 35.705889 327.000000 127.176444 35.705889 336.000000 
 127.176556 35.705889 322.000000 127.176556 35.705889 330.000000 
 127.176667 35.705889 317.000000 127.176667 35.705889 324.000000 
 127.175667 35.705889 362.000000 127.175667 35.705889 367.000000 
 127.175778 35.705889 359.000000 127.175778 35.705889 363.000000 
 127.175889 35.705889 355.000000 127.175889 35.705889 360.000000 
 127.176000 35.705889 351.000000 127.176000 35.705889 356.000000 
 127.176222 35.705889 339.000000 127.176222 35.705889 348.000000 
 127.176444 35.705889 327.000000 127.176444 35.705889 336.000000 
 127.176556 35.705889 322.000000 127.176556 35.705889 330.000000 
 127.176667 35.705889 317.000000 127.176667 35.705889 324.000000 
 127.176778 35.705889 313.000000 127.176778 35.705889 319.000000 
 127.175667 35.706000 363.000000 127.175667 35.706000 364.000000 
 127.175778 35.706000 360.000000 127.175778 35.706000 361.000000 
 127.175889 35.706000 356.000000 127.175889 35.706000 358.000000 
 127.176000 35.706000 353.000000 127.176000 35.706000 355.000000 
 127.176222 35.706000 342.000000 127.176222 35.706000 347.000000 
 127.176444 35.706000 330.000000 127.176444 35.706000 335.000000 
 127.176556 35.706000 324.000000 127.176556 35.706000 329.000000 
 127.176667 35.706000 319.000000 127.176667 35.706000 323.000000 
 127.176778 35.706000 315.000000 127.176778 35.706000 318.000000 
 127.175667 35.706111 361.000000 127.175667 35.706111 358.000000 
 127.175778 35.706111 358.000000 127.175778 35.706111 355.000000 
 127.175889 35.706111 355.000000 127.175889 35.706111 352.000000 
 127.176000 35.706111 351.000000 127.176000 35.706111 349.000000 
 127.176222 35.706111 341.000000 127.176222 35.706111 341.000000 
 127.176444 35.706111 329.000000 127.176444 35.706111 331.000000 
 127.176556 35.706111 323.000000 127.176556 35.706111 325.000000 
 127.176667 35.706111 318.000000 127.176667 35.706111 319.000000 
 127.176778 35.706111 314.000000 127.176778 35.706111 315.000000 
 127.175667 35.706222 355.000000 127.175667 35.706222 353.000000 
 127.175778 35.706222 352.000000 127.175778 35.706222 351.000000 
 127.175889 35.706222 349.000000 127.175889 35.706222 347.000000 
 127.176000 35.706222 345.000000 127.176000 35.706222 344.000000 
 127.176222 35.706222 336.000000 127.176222 35.706222 336.000000 
 127.176444 35.706222 325.000000 127.176444 35.706222 327.000000 
 127.176556 35.706222 319.000000 127.176556 35.706222 322.000000 
 127.176667 35.706222 315.000000 127.176667 35.706222 317.000000 
 127.176778 35.706222 311.000000 127.176778 35.706222 315.000000 
 127.175778 35.706222 352.000000 127.175778 35.706222 351.000000 
 127.175889 35.706222 349.000000 127.175889 35.706222 347.000000 
 127.176000 35.706222 345.000000 127.176000 35.706222 344.000000 
 127.176111 35.706222 341.000000 127.176111 35.706222 340.000000 
 127.176333 35.706222 331.000000 127.176333 35.706222 332.000000 
 127.176556 35.706222 319.000000 127.176556 35.706222 322.000000 
 127.176667 35.706222 315.000000 127.176667 35.706222 317.000000 
 127.176778 35.706222 311.000000 127.176778 35.706222 315.000000 
 127.176889 35.706222 308.000000 127.176889 35.706222 312.000000 
 127.175778 35.706333 347.000000 127.175778 35.706333 345.000000 
 127.175889 35.706333 344.000000 127.175889 35.706333 343.000000 
 127.176000 35.706333 340.000000 127.176000 35.706333 339.000000 
 127.176111 35.706333 336.000000 127.176111 35.706333 335.000000 
 127.176333 35.706333 327.000000 127.176333 35.706333 328.000000 
 127.176556 35.706333 317.000000 127.176556 35.706333 320.000000 
 127.176667 35.706333 315.000000 127.176667 35.706333 318.000000 
 127.176778 35.706333 312.000000 127.176778 35.706333 318.000000 
 127.176889 35.706333 310.000000 127.176889 35.706333 318.000000 
 127.175778 35.706444 343.000000 127.175778 35.706444 342.000000 
 127.175889 35.706444 339.000000 127.175889 35.706444 340.000000 
 127.176000 35.706444 335.000000 127.176000 35.706444 336.000000 
 127.176111 35.706444 332.000000 127.176111 35.706444 334.000000 
 127.176333 35.706444 323.000000 127.176333 35.706444 328.000000 
 127.176556 35.706444 318.000000 127.176556 35.706444 327.000000 
 127.176667 35.706444 318.000000 127.176667 35.706444 327.000000 
 127.176778 35.706444 318.000000 127.176778 35.706444 328.000000 
 127.176889 35.706444 317.000000 127.176889 35.706444 327.000000 
 127.175778 35.706556 340.000000 127.175778 35.706556 348.000000 
 127.175889 35.706556 336.000000 127.175889 35.706556 346.000000 
 127.176000 35.706556 334.000000 127.176000 35.706556 344.000000 
 127.176111 35.706556 331.000000 127.176111 35.706556 341.000000 
 127.176333 35.706556 327.000000 127.176333 35.706556 335.000000 
 127.176556 35.706556 327.000000 127.176556 35.706556 332.000000 
 127.176667 35.706556 328.000000 127.176667 35.706556 332.000000 
 127.176778 35.706556 327.000000 127.176778 35.706556 331.000000 
 127.176889 35.706556 326.000000 127.176889 35.706556 329.000000 
 127.175889 35.706556 336.000000 127.175889 35.706556 346.000000 
 127.176000 35.706556 334.000000 127.176000 35.706556 344.000000 
 127.176111 35.706556 331.000000 127.176111 35.706556 341.000000 
 127.176222 35.706556 328.000000 127.176222 35.706556 337.000000 
 127.176444 35.706556 327.000000 127.176444 35.706556 333.000000 
 127.176667 35.706556 328.000000 127.176667 35.706556 332.000000 
 127.176778 35.706556 327.000000 127.176778 35.706556 331.000000 
 127.176889 35.706556 326.000000 127.176889 35.706556 329.000000 
 127.177000 35.706556 324.000000 127.177000 35.706556 327.000000 
 127.175889 35.706667 344.000000 127.175889 35.706667 354.000000 
 127.176000 35.706667 341.000000 127.176000 35.706667 351.000000 
 127.176111 35.706667 337.000000 127.176111 35.706667 347.000000 
 127.176222 35.706667 335.000000 127.176222 35.706667 343.000000 
 127.176444 35.706667 332.000000 127.176444 35.706667 338.000000 
 127.176667 35.706667 331.000000 127.176667 35.706667 334.000000 
 127.176778 35.706667 329.000000 127.176778 35.706667 332.000000 
 127.176889 35.706667 327.000000 127.176889 35.706667 330.000000 
 127.177000 35.706667 325.000000 127.177000 35.706667 327.000000 
 127.175889 35.706778 351.000000 127.175889 35.706778 358.000000 
 127.176000 35.706778 347.000000 127.176000 35.706778 354.000000 
 127.176111 35.706778 343.000000 127.176111 35.706778 349.000000 
 127.176222 35.706778 340.000000 127.176222 35.706778 344.000000 
 127.176444 35.706778 336.000000 127.176444 35.706778 338.000000 
 127.176667 35.706778 332.000000 127.176667 35.706778 333.000000 
 127.176778 35.706778 330.000000 127.176778 35.706778 331.000000 
 127.176889 35.706778 327.000000 127.176889 35.706778 327.000000 
 127.177000 35.706778 324.000000 127.177000 35.706778 324.000000 
 127.175889 35.706889 354.000000 127.175889 35.706889 361.000000 
 127.176000 35.706889 349.000000 127.176000 35.706889 355.000000 
 127.176111 35.706889 344.000000 127.176111 35.706889 349.000000 
 127.176222 35.706889 341.000000 127.176222 35.706889 341.000000 
 127.176444 35.706889 336.000000 127.176444 35.706889 335.000000 
 127.176667 35.706889 331.000000 127.176667 35.706889 331.000000 
 127.176778 35.706889 327.000000 127.176778 35.706889 327.000000 
 127.176889 35.706889 324.000000 127.176889 35.706889 323.000000 
 127.177000 35.706889 322.000000 127.177000 35.706889 321.000000 
 127.176000 35.706889 349.000000 127.176000 35.706889 355.000000 
 127.176111 35.706889 344.000000 127.176111 35.706889 349.000000 
 127.176222 35.706889 341.000000 127.176222 35.706889 341.000000 
 127.176333 35.706889 338.000000 127.176333 35.706889 338.000000 
 127.176556 35.706889 333.000000 127.176556 35.706889 333.000000 
 127.176778 35.706889 327.000000 127.176778 35.706889 327.000000 
 127.176889 35.706889 324.000000 127.176889 35.706889 323.000000 
 127.177000 35.706889 322.000000 127.177000 35.706889 321.000000 
 127.177111 35.706889 318.000000 127.177111 35.706889 318.000000 
 127.176000 35.707000 349.000000 127.176000 35.707000 355.000000 
 127.176111 35.707000 341.000000 127.176111 35.707000 349.000000 
 127.176222 35.707000 338.000000 127.176222 35.707000 340.000000 
 127.176333 35.707000 335.000000 127.176333 35.707000 336.000000 
 127.176556 35.707000 331.000000 127.176556 35.707000 331.000000 
 127.176778 35.707000 323.000000 127.176778 35.707000 323.000000 
 127.176889 35.707000 321.000000 127.176889 35.707000 321.000000 
 127.177000 35.707000 318.000000 127.177000 35.707000 319.000000 
 127.177111 35.707000 315.000000 127.177111 35.707000 316.000000 
 127.176000 35.707111 349.000000 127.176000 35.707111 359.000000 
 127.176111 35.707111 340.000000 127.176111 35.707111 353.000000 
 127.176222 35.707111 336.000000 127.176222 35.707111 347.000000 
 127.176333 35.707111 333.000000 127.176333 35.707111 341.000000 
 127.176556 35.707111 327.000000 127.176556 35.707111 329.000000 
 127.176778 35.707111 321.000000 127.176778 35.707111 322.000000 
 127.176889 35.707111 319.000000 127.176889 35.707111 321.000000 
 127.177000 35.707111 316.000000 127.177000 35.707111 320.000000 
 127.177111 35.707111 314.000000 127.177111 35.707111 320.000000 
 127.176000 35.707222 353.000000 127.176000 35.707222 363.000000 
 127.176111 35.707222 347.000000 127.176111 35.707222 357.000000 
 127.176222 35.707222 341.000000 127.176222 35.707222 351.000000 
 127.176333 35.707222 334.000000 127.176333 35.707222 345.000000 
 127.176556 35.707222 325.000000 127.176556 35.707222 333.000000 
 127.176778 35.707222 321.000000 127.176778 35.707222 329.000000 
 127.176889 35.707222 320.000000 127.176889 35.707222 329.000000 
 127.177000 35.707222 320.000000 127.177000 35.707222 329.000000 
 127.177111 35.707222 321.000000 127.177111 35.707222 329.000000 
 127.176111 35.707222 347.000000 127.176111 35.707222 357.000000 
 127.176222 35.707222 341.000000 127.176222 35.707222 351.000000 
 127.176333 35.707222 334.000000 127.176333 35.707222 345.000000 
 127.176444 35.707222 329.000000 127.176444 35.707222 338.000000 
 127.176667 35.707222 322.000000 127.176667 35.707222 331.000000 
 127.176889 35.707222 320.000000 127.176889 35.707222 329.000000 
 127.177000 35.707222 320.000000 127.177000 35.707222 329.000000 
 127.177111 35.707222 321.000000 127.177111 35.707222 329.000000 
 127.177222 35.707222 321.000000 127.177222 35.707222 328.000000 
 127.176111 35.707333 351.000000 127.176111 35.707333 360.000000 
 127.176222 35.707333 345.000000 127.176222 35.707333 353.000000 
 127.176333 35.707333 338.000000 127.176333 35.707333 346.000000 
 127.176444 35.707333 333.000000 127.176444 35.707333 341.000000 
 127.176667 35.707333 329.000000 127.176667 35.707333 340.000000 
 127.176889 35.707333 329.000000 127.176889 35.707333 340.000000 
 127.177000 35.707333 329.000000 127.177000 35.707333 340.000000 
 127.177111 35.707333 328.000000 127.177111 35.707333 339.000000 
 127.177222 35.707333 328.000000 127.177222 35.707333 339.000000 
 127.176111 35.707444 353.000000 127.176111 35.707444 361.000000 
 127.176222 35.707444 346.000000 127.176222 35.707444 353.000000 
 127.176333 35.707444 341.000000 127.176333 35.707444 347.000000 
 127.176444 35.707444 339.000000 127.176444 35.707444 344.000000 
 127.176667 35.707444 340.000000 127.176667 35.707444 345.000000 
 127.176889 35.707444 340.000000 127.176889 35.707444 346.000000 
 127.177000 35.707444 339.000000 127.177000 35.707444 346.000000 
 127.177111 35.707444 339.000000 127.177111 35.707444 346.000000 
 127.177222 35.707444 338.000000 127.177222 35.707444 345.000000 
 127.176111 35.707556 353.000000 127.176111 35.707556 363.000000 
 127.176222 35.707556 347.000000 127.176222 35.707556 357.000000 
 127.176333 35.707556 344.000000 127.176333 35.707556 354.000000 
 127.176444 35.707556 344.000000 127.176444 35.707556 353.000000 
 127.176667 35.707556 346.000000 127.176667 35.707556 355.000000 
 127.176889 35.707556 346.000000 127.176889 35.707556 356.000000 
 127.177000 35.707556 346.000000 127.177000 35.707556 355.000000 
 127.177111 35.707556 345.000000 127.177111 35.707556 354.000000 
 127.177222 35.707556 343.000000 127.177222 35.707556 350.000000 
 127.176222 35.707556 347.000000 127.176222 35.707556 357.000000 
 127.176333 35.707556 344.000000 127.176333 35.707556 354.000000 
 127.176444 35.707556 344.000000 127.176444 35.707556 353.000000 
 127.176556 35.707556 345.000000 127.176556 35.707556 354.000000 
 127.176778 35.707556 346.000000 127.176778 35.707556 356.000000 
 127.177000 35.707556 346.000000 127.177000 35.707556 355.000000 
 127.177111 35.707556 345.000000 127.177111 35.707556 354.000000 
 127.177222 35.707556 343.000000 127.177222 35.707556 350.000000 
 127.177333 35.707556 342.000000 127.177333 35.707556 347.000000 
 127.176222 35.707667 354.000000 127.176222 35.707667 363.000000 
 127.176333 35.707667 353.000000 127.176333 35.707667 362.000000 
 127.176444 35.707667 354.000000 127.176444 35.707667 362.000000 
 127.176556 35.707667 355.000000 127.176556 35.707667 362.000000 
 127.176778 35.707667 356.000000 127.176778 35.707667 362.000000 
 127.177000 35.707667 354.000000 127.177000 35.707667 359.000000 
 127.177111 35.707667 350.000000 127.177111 35.707667 356.000000 
 127.177222 35.707667 347.000000 127.177222 35.707667 353.000000 
 127.177333 35.707667 344.000000 127.177333 35.707667 347.000000 
 127.176222 35.707778 362.000000 127.176222 35.707778 371.000000 
 127.176333 35.707778 362.000000 127.176333 35.707778 372.000000 
 127.176444 35.707778 362.000000 127.176444 35.707778 373.000000 
 127.176556 35.707778 363.000000 127.176556 35.707778 373.000000 
 127.176778 35.707778 361.000000 127.176778 35.707778 369.000000 
 127.177000 35.707778 356.000000 127.177000 35.707778 363.000000 
 127.177111 35.707778 353.000000 127.177111 35.707778 359.000000 
 127.177222 35.707778 347.000000 127.177222 35.707778 355.000000 
 127.177333 35.707778 342.000000 127.177333 35.707778 348.000000 
 127.176222 35.707889 372.000000 127.176222 35.707889 375.000000 
 127.176333 35.707889 373.000000 127.176333 35.707889 375.000000 
 127.176444 35.707889 373.000000 127.176444 35.707889 375.000000 
 127.176556 35.707889 372.000000 127.176556 35.707889 376.000000 
 127.176778 35.707889 367.000000 127.176778 35.707889 372.000000 
 127.177000 35.707889 359.000000 127.177000 35.707889 365.000000 
 127.177111 35.707889 355.000000 127.177111 35.707889 359.000000 
 127.177222 35.707889 348.000000 127.177222 35.707889 355.000000 
 127.177333 35.707889 340.000000 127.177333 35.707889 350.000000 
 127.176333 35.707889 373.000000 127.176333 35.707889 375.000000 
 127.176444 35.707889 373.000000 127.176444 35.707889 375.000000 
 127.176556 35.707889 372.000000 127.176556 35.707889 376.000000 
 127.176667 35.707889 369.000000 127.176667 35.707889 375.000000 
 127.176889 35.707889 363.000000 127.176889 35.707889 368.000000 
 127.177111 35.707889 355.000000 127.177111 35.707889 359.000000 
 127.177222 35.707889 348.000000 127.177222 35.707889 355.000000 
 127.177333 35.707889 340.000000 127.177333 35.707889 350.000000 
 127.177444 35.707889 335.000000 127.177444 35.707889 343.000000 
 127.176333 35.708000 375.000000 127.176333 35.708000 375.000000 
 127.176444 35.708000 376.000000 127.176444 35.708000 375.000000 
 127.176556 35.708000 375.000000 127.176556 35.708000 375.000000 
 127.176667 35.708000 372.000000 127.176667 35.708000 374.000000 
 127.176889 35.708000 365.000000 127.176889 35.708000 368.000000 
 127.177111 35.708000 355.000000 127.177111 35.708000 360.000000 
 127.177222 35.708000 350.000000 127.177222 35.708000 356.000000 
 127.177333 35.708000 343.000000 127.177333 35.708000 351.000000 
 127.177444 35.708000 337.000000 127.177444 35.708000 346.000000 
 127.176333 35.708111 375.000000 127.176333 35.708111 371.000000 
 127.176444 35.708111 375.000000 127.176444 35.708111 371.000000 
 127.176556 35.708111 374.000000 127.176556 35.708111 370.000000 
 127.176667 35.708111 371.000000 127.176667 35.708111 368.000000 
 127.176889 35.708111 364.000000 127.176889 35.708111 362.000000 
 127.177111 35.708111 356.000000 127.177111 35.708111 356.000000 
 127.177222 35.708111 351.000000 127.177222 35.708111 353.000000 
 127.177333 35.708111 346.000000 127.177333 35.708111 350.000000 
 127.177444 35.708111 341.000000 127.177444 35.708111 347.000000 
 127.176333 35.708222 371.000000 127.176333 35.708222 368.000000 
 127.176444 35.708222 370.000000 127.176444 35.708222 368.000000 
 127.176556 35.708222 368.000000 127.176556 35.708222 366.000000 
 127.176667 35.708222 366.000000 127.176667 35.708222 363.000000 
 127.176889 35.708222 359.000000 127.176889 35.708222 355.000000 
 127.177111 35.708222 353.000000 127.177111 35.708222 351.000000 
 127.177222 35.708222 350.000000 127.177222 35.708222 347.000000 
 127.177333 35.708222 347.000000 127.177333 35.708222 344.000000 
 127.177444 35.708222 344.000000 127.177444 35.708222 342.000000 
 127.176444 35.708222 370.000000 127.176444 35.708222 368.000000 
 127.176556 35.708222 368.000000 127.176556 35.708222 366.000000 
 127.176667 35.708222 366.000000 127.176667 35.708222 363.000000 
 127.176778 35.708222 362.000000 127.176778 35.708222 359.000000 
 127.177000 35.708222 356.000000 127.177000 35.708222 353.000000 
 127.177222 35.708222 350.000000 127.177222 35.708222 347.000000 
 127.177333 35.708222 347.000000 127.177333 35.708222 344.000000 
 127.177444 35.708222 344.000000 127.177444 35.708222 342.000000 
 127.177556 35.708222 341.000000 127.177556 35.708222 340.000000 
 127.176444 35.708333 366.000000 127.176444 35.708333 365.000000 
 127.176556 35.708333 363.000000 127.176556 35.708333 360.000000 
 127.176667 35.708333 359.000000 127.176667 35.708333 353.000000 
 127.176778 35.708333 355.000000 127.176778 35.708333 347.000000 
 127.177000 35.708333 351.000000 127.177000 35.708333 340.000000 
 127.177222 35.708333 344.000000 127.177222 35.708333 336.000000 
 127.177333 35.708333 342.000000 127.177333 35.708333 335.000000 
 127.177444 35.708333 340.000000 127.177444 35.708333 334.000000 
 127.177556 35.708333 339.000000 127.177556 35.708333 334.000000 
 127.176444 35.708444 360.000000 127.176444 35.708444 365.000000 
 127.176556 35.708444 353.000000 127.176556 35.708444 361.000000 
 127.176667 35.708444 347.000000 127.176667 35.708444 354.000000 
 127.176778 35.708444 343.000000 127.176778 35.708444 347.000000 
 127.177000 35.708444 337.000000 127.177000 35.708444 335.000000 
 127.177222 35.708444 335.000000 127.177222 35.708444 330.000000 
 127.177333 35.708444 334.000000 127.177333 35.708444 330.000000 
 127.177444 35.708444 334.000000 127.177444 35.708444 330.000000 
 127.177556 35.708444 333.000000 127.177556 35.708444 329.000000 
 127.176556 35.708444 353.000000 127.176556 35.708444 361.000000 
 127.176667 35.708444 347.000000 127.176667 35.708444 354.000000 
 127.176778 35.708444 343.000000 127.176778 35.708444 347.000000 
 127.176889 35.708444 340.000000 127.176889 35.708444 341.000000 
 127.177111 35.708444 336.000000 127.177111 35.708444 332.000000 
 127.177333 35.708444 334.000000 127.177333 35.708444 330.000000 
 127.177444 35.708444 334.000000 127.177444 35.708444 330.000000 
 127.177556 35.708444 333.000000 127.177556 35.708444 329.000000 
 127.177667 35.708444 332.000000 127.177667 35.708444 328.000000 
 127.176556 35.708556 354.000000 127.176556 35.708556 365.000000 
 127.176667 35.708556 347.000000 127.176667 35.708556 361.000000 
 127.176778 35.708556 341.000000 127.176778 35.708556 356.000000 
 127.176889 35.708556 335.000000 127.176889 35.708556 348.000000 
 127.177111 35.708556 330.000000 127.177111 35.708556 335.000000 
 127.177333 35.708556 330.000000 127.177333 35.708556 321.000000 
 127.177444 35.708556 329.000000 127.177444 35.708556 317.000000 
 127.177556 35.708556 328.000000 127.177556 35.708556 314.000000 
 127.177667 35.708556 328.000000 127.177667 35.708556 314.000000 
 127.176556 35.708667 361.000000 127.176556 35.708667 367.000000 
 127.176667 35.708667 356.000000 127.176667 35.708667 365.000000 
 127.176778 35.708667 348.000000 127.176778 35.708667 359.000000 
 127.176889 35.708667 342.000000 127.176889 35.708667 354.000000 
 127.177111 35.708667 328.000000 127.177111 35.708667 340.000000 
 127.177333 35.708667 317.000000 127.177333 35.708667 325.000000 
 127.177444 35.708667 314.000000 127.177444 35.708667 319.000000 
 127.177556 35.708667 314.000000 127.177556 35.708667 314.000000 
 127.177667 35.708667 314.000000 127.177667 35.708667 306.000000 
 127.176556 35.708778 365.000000 127.176556 35.708778 365.000000 
 127.176667 35.708778 359.000000 127.176667 35.708778 365.000000 
 127.176778 35.708778 354.000000 127.176778 35.708778 362.000000 
 127.176889 35.708778 347.000000 127.176889 35.708778 359.000000 
 127.177111 35.708778 333.000000 127.177111 35.708778 347.000000 
 127.177333 35.708778 319.000000 127.177333 35.708778 332.000000 
 127.177444 35.708778 314.000000 127.177444 35.708778 324.000000 
 127.177556 35.708778 306.000000 127.177556 35.708778 317.000000 
 127.177667 35.708778 306.000000 127.177667 35.708778 311.000000 
 127.176667 35.708778 359.000000 127.176667 35.708778 365.000000 
 127.176778 35.708778 354.000000 127.176778 35.708778 362.000000 
 127.176889 35.708778 347.000000 127.176889 35.708778 359.000000 
 127.177000 35.708778 340.000000 127.177000 35.708778 353.000000 
 127.177222 35.708778 325.000000 127.177222 35.708778 339.000000 
 127.177444 35.708778 314.000000 127.177444 35.708778 324.000000 
 127.177556 35.708778 306.000000 127.177556 35.708778 317.000000 
 127.177667 35.708778 306.000000 127.177667 35.708778 311.000000 
 127.177778 35.708778 307.000000 127.177778 35.708778 306.000000 
 127.176667 35.708889 362.000000 127.176667 35.708889 363.000000 
 127.176778 35.708889 359.000000 127.176778 35.708889 362.000000 
 127.176889 35.708889 353.000000 127.176889 35.708889 360.000000 
 127.177000 35.708889 347.000000 127.177000 35.708889 355.000000 
 127.177222 35.708889 332.000000 127.177222 35.708889 343.000000 
 127.177444 35.708889 317.000000 127.177444 35.708889 327.000000 
 127.177556 35.708889 311.000000 127.177556 35.708889 319.000000 
 127.177667 35.708889 306.000000 127.177667 35.708889 314.000000 
 127.177778 35.708889 301.000000 127.177778 35.708889 310.000000 
 127.176667 35.709000 362.000000 127.176667 35.709000 359.000000 
 127.176778 35.709000 360.000000 127.176778 35.709000 359.000000 
 127.176889 35.709000 355.000000 127.176889 35.709000 359.000000 
 127.177000 35.709000 350.000000 127.177000 35.709000 356.000000 
 127.177222 35.709000 335.000000 127.177222 35.709000 347.000000 
 127.177444 35.709000 319.000000 127.177444 35.709000 332.000000 
 127.177556 35.709000 314.000000 127.177556 35.709000 327.000000 
 127.177667 35.709000 310.000000 127.177667 35.709000 319.000000 
 127.177778 35.709000 306.000000 127.177778 35.709000 315.000000 
 127.176667 35.709111 359.000000 127.176667 35.709111 356.000000 
 127.176778 35.709111 359.000000 127.176778 35.709111 357.000000 
 127.176889 35.709111 356.000000 127.176889 35.709111 358.000000 
 127.177000 35.709111 352.000000 127.177000 35.709111 356.000000 
 127.177222 35.709111 339.000000 127.177222 35.709111 350.000000 
 127.177444 35.709111 327.000000 127.177444 35.709111 336.000000 
 127.177556 35.709111 319.000000 127.177556 35.709111 331.000000 
 127.177667 35.709111 315.000000 127.177667 35.709111 326.000000 
 127.177778 35.709111 311.000000 127.177778 35.709111 319.000000 
 127.176778 35.709111 359.000000 127.176778 35.709111 357.000000 
 127.176889 35.709111 356.000000 127.176889 35.709111 358.000000 
 127.177000 35.709111 352.000000 127.177000 35.709111 356.000000 
 127.177111 35.709111 347.000000 127.177111 35.709111 354.000000 
 127.177333 35.709111 332.000000 127.177333 35.709111 343.000000 
 127.177556 35.709111 319.000000 127.177556 35.709111 331.000000 
 127.177667 35.709111 315.000000 127.177667 35.709111 326.000000 
 127.177778 35.709111 311.000000 127.177778 35.709111 319.000000 
 127.177889 35.709111 305.000000 127.177889 35.709111 314.000000 
 127.176778 35.709222 358.000000 127.176778 35.709222 356.000000 
 127.176889 35.709222 356.000000 127.176889 35.709222 358.000000 
 127.177000 35.709222 354.000000 127.177000 35.709222 359.000000 
 127.177111 35.709222 350.000000 127.177111 35.709222 356.000000 
 127.177333 35.709222 336.000000 127.177333 35.709222 347.000000 
 127.177556 35.709222 326.000000 127.177556 35.709222 336.000000 
 127.177667 35.709222 319.000000 127.177667 35.709222 330.000000 
 127.177778 35.709222 314.000000 127.177778 35.709222 325.000000 
 127.177889 35.709222 310.000000 127.177889 35.709222 317.000000 
 127.176778 35.709333 358.000000 127.176778 35.709333 356.000000 
 127.176889 35.709333 359.000000 127.176889 35.709333 358.000000 
 127.177000 35.709333 356.000000 127.177000 35.709333 360.000000 
 127.177111 35.709333 352.000000 127.177111 35.709333 358.000000 
 127.177333 35.709333 341.000000 127.177333 35.709333 347.000000 
 127.177556 35.709333 330.000000 127.177556 35.709333 336.000000 
 127.177667 35.709333 325.000000 127.177667 35.709333 330.000000 
 127.177778 35.709333 317.000000 127.177778 35.709333 325.000000 
 127.177889 35.709333 312.000000 127.177889 35.709333 317.000000 
 127.176778 35.709444 358.000000 127.176778 35.709444 355.000000 
 127.176889 35.709444 360.000000 127.176889 35.709444 358.000000 
 127.177000 35.709444 358.000000 127.177000 35.709444 360.000000 
 127.177111 35.709444 352.000000 127.177111 35.709444 358.000000 
 127.177333 35.709444 342.000000 127.177333 35.709444 345.000000 
 127.177556 35.709444 330.000000 127.177556 35.709444 335.000000 
 127.177667 35.709444 325.000000 127.177667 35.709444 329.000000 
 127.177778 35.709444 317.000000 127.177778 35.709444 323.000000 
 127.177889 35.709444 312.000000 127.177889 35.709444 317.000000 
 127.176889 35.709444 360.000000 127.176889 35.709444 358.000000 
 127.177000 35.709444 358.000000 127.177000 35.709444 360.000000 
 127.177111 35.709444 352.000000 127.177111 35.709444 358.000000 
 127.177222 35.709444 347.000000 127.177222 35.709444 351.000000 
 127.177444 35.709444 336.000000 127.177444 35.709444 340.000000 
 127.177667 35.709444 325.000000 127.177667 35.709444 329.000000 
 127.177778 35.709444 317.000000 127.177778 35.709444 323.000000 
 127.177889 35.709444 312.000000 127.177889 35.709444 317.000000 
 127.178000 35.709444 304.000000 127.178000 35.709444 311.000000 
 127.176889 35.709556 360.000000 127.176889 35.709556 356.000000 
 127.177000 35.709556 358.000000 127.177000 35.709556 357.000000 
 127.177111 35.709556 351.000000 127.177111 35.709556 356.000000 
 127.177222 35.709556 345.000000 127.177222 35.709556 349.000000 
 127.177444 35.709556 335.000000 127.177444 35.709556 339.000000 
 127.177667 35.709556 323.000000 127.177667 35.709556 328.000000 
 127.177778 35.709556 317.000000 127.177778 35.709556 322.000000 
 127.177889 35.709556 311.000000 127.177889 35.709556 316.000000 
 127.178000 35.709556 302.000000 127.178000 35.709556 310.000000 
 127.176889 35.709667 357.000000 127.176889 35.709667 355.000000 
 127.177000 35.709667 356.000000 127.177000 35.709667 355.000000 
 127.177111 35.709667 349.000000 127.177111 35.709667 355.000000 
 127.177222 35.709667 344.000000 127.177222 35.709667 349.000000 
 127.177444 35.709667 333.000000 127.177444 35.709667 338.000000 
 127.177667 35.709667 322.000000 127.177667 35.709667 327.000000 
 127.177778 35.709667 316.000000 127.177778 35.709667 321.000000 
 127.177889 35.709667 310.000000 127.177889 35.709667 316.000000 
 127.178000 35.709667 301.000000 127.178000 35.709667 308.000000 
 127.176889 35.709778 355.000000 127.176889 35.709778 353.000000 
 127.177000 35.709778 355.000000 127.177000 35.709778 355.000000 
 127.177111 35.709778 349.000000 127.177111 35.709778 355.000000 
 127.177222 35.709778 343.000000 127.177222 35.709778 349.000000 
 127.177444 35.709778 333.000000 127.177444 35.709778 338.000000 
 127.177667 35.709778 321.000000 127.177667 35.709778 328.000000 
 127.177778 35.709778 316.000000 127.177778 35.709778 322.000000 
 127.177889 35.709778 308.000000 127.177889 35.709778 316.000000 
 127.178000 35.709778 303.000000 127.178000 35.709778 310.000000 
 127.177000 35.709778 355.000000 127.177000 35.709778 355.000000 
 127.177111 35.709778 349.000000 127.177111 35.709778 355.000000 
 127.177222 35.709778 343.000000 127.177222 35.709778 349.000000 
 127.177333 35.709778 338.000000 127.177333 35.709778 344.000000 
 127.177556 35.709778 327.000000 127.177556 35.709778 333.000000 
 127.177778 35.709778 316.000000 127.177778 35.709778 322.000000 
 127.177889 35.709778 308.000000 127.177889 35.709778 316.000000 
 127.178000 35.709778 303.000000 127.178000 35.709778 310.000000 
 127.178111 35.709778 300.000000 127.178111 35.709778 309.000000 
 127.177000 35.709889 355.000000 127.177000 35.709889 355.000000 
 127.177111 35.709889 349.000000 127.177111 35.709889 355.000000 
 127.177222 35.709889 344.000000 127.177222 35.709889 350.000000 
 127.177333 35.709889 338.000000 127.177333 35.709889 345.000000 
 127.177556 35.709889 328.000000 127.177556 35.709889 334.000000 
 127.177778 35.709889 316.000000 127.177778 35.709889 324.000000 
 127.177889 35.709889 310.000000 127.177889 35.709889 317.000000 
 127.178000 35.709889 309.000000 127.178000 35.709889 314.000000 
 127.178111 35.709889 310.000000 127.178111 35.709889 312.000000 
 127.177000 35.710000 355.000000 127.177000 35.710000 353.000000 
 127.177111 35.710000 350.000000 127.177111 35.710000 355.000000 
 127.177222 35.710000 345.000000 127.177222 35.710000 353.000000 
 127.177333 35.710000 340.000000 127.177333 35.710000 347.000000 
 127.177556 35.710000 329.000000 127.177556 35.710000 337.000000 
 127.177778 35.710000 317.000000 127.177778 35.710000 328.000000 
 127.177889 35.710000 314.000000 127.177889 35.710000 324.000000 
 127.178000 35.710000 312.000000 127.178000 35.710000 320.000000 
 127.178111 35.710000 314.000000 127.178111 35.710000 321.000000 
 127.177000 35.710111 355.000000 127.177000 35.710111 351.000000 
 127.177111 35.710111 353.000000 127.177111 35.710111 355.000000 
 127.177222 35.710111 347.000000 127.177222 35.710111 355.000000 
 127.177333 35.710111 342.000000 127.177333 35.710111 349.000000 
 127.177556 35.710111 333.000000 127.177556 35.710111 340.000000 
 127.177778 35.710111 324.000000 127.177778 35.710111 332.000000 
 127.177889 35.710111 320.000000 127.177889 35.710111 329.000000 
 127.178000 35.710111 321.000000 127.178000 35.710111 326.000000 
 127.178111 35.710111 323.000000 127.178111 35.710111 327.000000 
 127.177111 35.710111 353.000000 127.177111 35.710111 355.000000 
 127.177222 35.710111 347.000000 127.177222 35.710111 355.000000 
 127.177333 35.710111 342.000000 127.177333 35.710111 349.000000 
 127.177444 35.710111 337.000000 127.177444 35.710111 344.000000 
 127.177667 35.710111 328.000000 127.177667 35.710111 335.000000 
 127.177889 35.710111 320.000000 127.177889 35.710111 329.000000 
 127.178000 35.710111 321.000000 127.178000 35.710111 326.000000 
 127.178111 35.710111 323.000000 127.178111 35.710111 327.000000 
 127.178222 35.710111 326.000000 127.178222 35.710111 329.000000 
 127.177111 35.710222 355.000000 127.177111 35.710222 353.000000 
 127.177222 35.710222 349.000000 127.177222 35.710222 355.000000 
 127.177333 35.710222 344.000000 127.177333 35.710222 352.000000 
 127.177444 35.710222 340.000000 127.177444 35.710222 348.000000 
 127.177667 35.710222 332.000000 127.177667 35.710222 341.000000 
 127.177889 35.710222 326.000000 127.177889 35.710222 337.000000 
 127.178000 35.710222 327.000000 127.178000 35.710222 337.000000 
 127.178111 35.710222 329.000000 127.178111 35.710222 338.000000 
 127.178222 35.710222 331.000000 127.178222 35.710222 338.000000 
 127.177111 35.710333 355.000000 127.177111 35.710333 352.000000 
 127.177222 35.710333 352.000000 127.177222 35.710333 353.000000 
 127.177333 35.710333 348.000000 127.177333 35.710333 351.000000 
 127.177444 35.710333 344.000000 127.177444 35.710333 350.000000 
 127.177667 35.710333 338.000000 127.177667 35.710333 344.000000 
 127.177889 35.710333 337.000000 127.177889 35.710333 342.000000 
 127.178000 35.710333 338.000000 127.178000 35.710333 342.000000 
 127.178111 35.710333 338.000000 127.178111 35.710333 342.000000 
 127.178222 35.710333 338.000000 127.178222 35.710333 343.000000 
 127.177111 35.710444 353.000000 127.177111 35.710444 347.000000 
 127.177222 35.710444 351.000000 127.177222 35.710444 347.000000 
 127.177333 35.710444 350.000000 127.177333 35.710444 347.000000 
 127.177444 35.710444 346.000000 127.177444 35.710444 345.000000 
 127.177667 35.710444 343.000000 127.177667 35.710444 342.000000 
 127.177889 35.710444 342.000000 127.177889 35.710444 341.000000 
 127.178000 35.710444 342.000000 127.178000 35.710444 342.000000 
 127.178111 35.710444 343.000000 127.178111 35.710444 343.000000 
 127.178222 35.710444 342.000000 127.178222 35.710444 345.000000 
 127.177222 35.710444 351.000000 127.177222 35.710444 347.000000 
 127.177333 35.710444 350.000000 127.177333 35.710444 347.000000 
 127.177444 35.710444 346.000000 127.177444 35.710444 345.000000 
 127.177556 35.710444 344.000000 127.177556 35.710444 343.000000 
 127.177778 35.710444 342.000000 127.177778 35.710444 341.000000 
 127.178000 35.710444 342.000000 127.178000 35.710444 342.000000 
 127.178111 35.710444 343.000000 127.178111 35.710444 343.000000 
 127.178222 35.710444 342.000000 127.178222 35.710444 345.000000 
 127.178333 35.710444 340.000000 127.178333 35.710444 344.000000 
 127.177222 35.710556 347.000000 127.177222 35.710556 343.000000 
 127.177333 35.710556 345.000000 127.177333 35.710556 342.000000 
 127.177444 35.710556 343.000000 127.177444 35.710556 340.000000 
 127.177556 35.710556 342.000000 127.177556 35.710556 339.000000 
 127.177778 35.710556 341.000000 127.177778 35.710556 337.000000 
 127.178000 35.710556 343.000000 127.178000 35.710556 339.000000 
 127.178111 35.710556 345.000000 127.178111 35.710556 340.000000 
 127.178222 35.710556 344.000000 127.178222 35.710556 340.000000 
 127.178333 35.710556 341.000000 127.178333 35.710556 341.000000 
 127.177222 35.710667 342.000000 127.177222 35.710667 337.000000 
 127.177333 35.710667 340.000000 127.177333 35.710667 333.000000 
 127.177444 35.710667 339.000000 127.177444 35.710667 332.000000 
 127.177556 35.710667 338.000000 127.177556 35.710667 331.000000 
 127.177778 35.710667 338.000000 127.177778 35.710667 331.000000 
 127.178000 35.710667 340.000000 127.178000 35.710667 331.000000 
 127.178111 35.710667 340.000000 127.178111 35.710667 331.000000 
 127.178222 35.710667 341.000000 127.178222 35.710667 332.000000 
 127.178333 35.710667 340.000000 127.178333 35.710667 333.000000 
 127.177222 35.710778 333.000000 127.177222 35.710778 333.000000 
 127.177333 35.710778 332.000000 127.177333 35.710778 329.000000 
 127.177444 35.710778 331.000000 127.177444 35.710778 327.000000 
 127.177556 35.710778 331.000000 127.177556 35.710778 325.000000 
 127.177778 35.710778 331.000000 127.177778 35.710778 323.000000 
 127.178000 35.710778 331.000000 127.178000 35.710778 324.000000 
 127.178111 35.710778 332.000000 127.178111 35.710778 325.000000 
 127.178222 35.710778 333.000000 127.178222 35.710778 325.000000 
 127.178333 35.710778 334.000000 127.178333 35.710778 326.000000 
 127.177333 35.710778 332.000000 127.177333 35.710778 329.000000 
 127.177444 35.710778 331.000000 127.177444 35.710778 327.000000 
 127.177556 35.710778 331.000000 127.177556 35.710778 325.000000 
 127.177667 35.710778 331.000000 127.177667 35.710778 323.000000 
 127.177889 35.710778 331.000000 127.177889 35.710778 323.000000 
 127.178111 35.710778 332.000000 127.178111 35.710778 325.000000 
 127.178222 35.710778 333.000000 127.178222 35.710778 325.000000 
 127.178333 35.710778 334.000000 127.178333 35.710778 326.000000 
 127.178444 35.710778 334.000000 127.178444 35.710778 327.000000 
 127.177333 35.710889 327.000000 127.177333 35.710889 328.000000 
 127.177444 35.710889 325.000000 127.177444 35.710889 322.000000 
 127.177556 35.710889 323.000000 127.177556 35.710889 317.000000 
 127.177667 35.710889 323.000000 127.177667 35.710889 312.000000 
 127.177889 35.710889 324.000000 127.177889 35.710889 310.000000 
 127.178111 35.710889 325.000000 127.178111 35.710889 311.000000 
 127.178222 35.710889 326.000000 127.178222 35.710889 313.000000 
 127.178333 35.710889 327.000000 127.178333 35.710889 314.000000 
 127.178444 35.710889 328.000000 127.178444 35.710889 314.000000 
 127.177333 35.711000 322.000000 127.177333 35.711000 329.000000 
 127.177444 35.711000 317.000000 127.177444 35.711000 322.000000 
 127.177556 35.711000 312.000000 127.177556 35.711000 316.000000 
 127.177667 35.711000 310.000000 127.177667 35.711000 311.000000 
 127.177889 35.711000 310.000000 127.177889 35.711000 304.000000 
 127.178111 35.711000 313.000000 127.178111 35.711000 306.000000 
 127.178222 35.711000 314.000000 127.178222 35.711000 308.000000 
 127.178333 35.711000 314.000000 127.178333 35.711000 309.000000 
 127.178444 35.711000 317.000000 127.178444 35.711000 310.000000 
 127.177444 35.711111 316.000000 127.177444 35.711111 324.000000 
 127.177556 35.711111 311.000000 127.177556 35.711111 317.000000 
 127.177667 35.711111 306.000000 127.177667 35.711111 311.000000 
 127.177778 35.711111 304.000000 127.177778 35.711111 306.000000 
 127.178000 35.711111 306.000000 127.178000 35.711111 297.000000 
 127.178222 35.711111 309.000000 127.178222 35.711111 296.000000 
 127.178333 35.711111 310.000000 127.178333 35.711111 297.000000 
 127.178444 35.711111 311.000000 127.178444 35.711111 299.000000 
 127.178556 35.711111 312.000000 127.178556 35.711111 301.000000 
 127.177444 35.711222 317.000000 127.177444 35.711222 327.000000 
 127.177556 35.711222 311.000000 127.177556 35.711222 320.000000 
 127.177667 35.711222 306.000000 127.177667 35.711222 313.000000 
 127.177778 35.711222 302.000000 127.177778 35.711222 308.000000 
 127.178000 35.711222 295.000000 127.178000 35.711222 297.000000 
 127.178222 35.711222 297.000000 127.178222 35.711222 290.000000 
 127.178333 35.711222 299.000000 127.178333 35.711222 289.000000 
 127.178444 35.711222 301.000000 127.178444 35.711222 290.000000 
 127.178556 35.711222 302.000000 127.178556 35.711222 291.000000 
 127.177444 35.711333 320.000000 127.177444 35.711333 330.000000 
 127.177556 35.711333 313.000000 127.177556 35.711333 323.000000 
 127.177667 35.711333 308.000000 127.177667 35.711333 316.000000 
 127.177778 35.711333 302.000000 127.177778 35.711333 310.000000 
 127.178000 35.711333 293.000000 127.178000 35.711333 299.000000 
 127.178222 35.711333 289.000000 127.178222 35.711333 291.000000 
 127.178333 35.711333 290.000000 127.178333 35.711333 287.000000 
 127.178444 35.711333 291.000000 127.178444 35.711333 282.000000 
 127.178556 35.711333 292.000000 127.178556 35.711333 283.000000 
 127.177556 35.711333 313.000000 127.177556 35.711333 323.000000 
 127.177667 35.711333 308.000000 127.177667 35.711333 316.000000 
 127.177778 35.711333 302.000000 127.177778 35.711333 310.000000 
 127.177889 35.711333 297.000000 127.177889 35.711333 305.000000 
 127.178111 35.711333 290.000000 127.178111 35.711333 296.000000 
 127.178333 35.711333 290.000000 127.178333 35.711333 287.000000 
 127.178444 35.711333 291.000000 127.178444 35.711333 282.000000 
 127.178556 35.711333 292.000000 127.178556 35.711333 283.000000 
 127.178667 35.711333 293.000000 127.178667 35.711333 284.000000 
 127.177556 35.711444 316.000000 127.177556 35.711444 327.000000 
 127.177667 35.711444 310.000000 127.177667 35.711444 321.000000 
 127.177778 35.711444 305.000000 127.177778 35.711444 315.000000 
 127.177889 35.711444 299.000000 127.177889 35.711444 310.000000 
 127.178111 35.711444 291.000000 127.178111 35.711444 301.000000 
 127.178333 35.711444 282.000000 127.178333 35.711444 293.000000 
 127.178444 35.711444 283.000000 127.178444 35.711444 287.000000 
 127.178556 35.711444 284.000000 127.178556 35.711444 282.000000 
 127.178667 35.711444 286.000000 127.178667 35.711444 276.000000 
 127.177556 35.711556 321.000000 127.177556 35.711556 328.000000 
 127.177667 35.711556 315.000000 127.177667 35.711556 323.000000 
 127.177778 35.711556 310.000000 127.177778 35.711556 318.000000 
 127.177889 35.711556 306.000000 127.177889 35.711556 315.000000 
 127.178111 35.711556 297.000000 127.178111 35.711556 306.000000 
 127.178333 35.711556 287.000000 127.178333 35.711556 298.000000 
 127.178444 35.711556 282.000000 127.178444 35.711556 295.000000 
 127.178556 35.711556 276.000000 127.178556 35.711556 290.000000 
 127.178667 35.711556 275.000000 127.178667 35.711556 281.000000 
 127.177556 35.711667 323.000000 127.177556 35.711667 335.000000 
 127.177667 35.711667 318.000000 127.177667 35.711667 329.000000 
 127.177778 35.711667 315.000000 127.177778 35.711667 327.000000 
 127.177889 35.711667 311.000000 127.177889 35.711667 323.000000 
 127.178111 35.711667 302.000000 127.178111 35.711667 314.000000 
 127.178333 35.711667 295.000000 127.178333 35.711667 305.000000 
 127.178444 35.711667 290.000000 127.178444 35.711667 300.000000 
 127.178556 35.711667 281.000000 127.178556 35.711667 297.000000 
 127.178667 35.711667 277.000000 127.178667 35.711667 293.000000 
 127.177667 35.711667 318.000000 127.177667 35.711667 329.000000 
 127.177778 35.711667 315.000000 127.177778 35.711667 327.000000 
 127.177889 35.711667 311.000000 127.177889 35.711667 323.000000 
 127.178000 35.711667 306.000000 127.178000 35.711667 318.000000 
 127.178222 35.711667 298.000000 127.178222 35.711667 309.000000 
 127.178444 35.711667 290.000000 127.178444 35.711667 300.000000 
 127.178556 35.711667 281.000000 127.178556 35.711667 297.000000 
 127.178667 35.711667 277.000000 127.178667 35.711667 293.000000 
 127.178778 35.711667 275.000000 127.178778 35.711667 290.000000 
 127.177667 35.711778 327.000000 127.177667 35.711778 335.000000 
 127.177778 35.711778 323.000000 127.177778 35.711778 332.000000 
 127.177889 35.711778 318.000000 127.177889 35.711778 328.000000 
 127.178000 35.711778 314.000000 127.178000 35.711778 323.000000 
 127.178222 35.711778 305.000000 127.178222 35.711778 314.000000 
 127.178444 35.711778 297.000000 127.178444 35.711778 304.000000 
 127.178556 35.711778 293.000000 127.178556 35.711778 299.000000 
 127.178667 35.711778 290.000000 127.178667 35.711778 295.000000 
 127.178778 35.711778 280.000000 127.178778 35.711778 291.000000 
 127.177667 35.711889 332.000000 127.177667 35.711889 335.000000 
 127.177778 35.711889 328.000000 127.177778 35.711889 333.000000 
 127.177889 35.711889 323.000000 127.177889 35.711889 330.000000 
 127.178000 35.711889 319.000000 127.178000 35.711889 328.000000 
 127.178222 35.711889 309.000000 127.178222 35.711889 319.000000 
 127.178444 35.711889 299.000000 127.178444 35.711889 308.000000 
 127.178556 35.711889 295.000000 127.178556 35.711889 302.000000 
 127.178667 35.711889 291.000000 127.178667 35.711889 296.000000 
 127.178778 35.711889 285.000000 127.178778 35.711889 290.000000 
 127.177667 35.712000 333.000000 127.177667 35.712000 330.000000 
 127.177778 35.712000 330.000000 127.177778 35.712000 329.000000 
 127.177889 35.712000 328.000000 127.177889 35.712000 328.000000 
 127.178000 35.712000 325.000000 127.178000 35.712000 327.000000 
 127.178222 35.712000 314.000000 127.178222 35.712000 321.000000 
 127.178444 35.712000 302.000000 127.178444 35.712000 308.000000 
 127.178556 35.712000 296.000000 127.178556 35.712000 302.000000 
 127.178667 35.712000 290.000000 127.178667 35.712000 295.000000 
 127.178778 35.712000 284.000000 127.178778 35.712000 288.000000 
 127.177778 35.712000 330.000000 127.177778 35.712000 329.000000 
 127.177889 35.712000 328.000000 127.177889 35.712000 328.000000 
 127.178000 35.712000 325.000000 127.178000 35.712000 327.000000 
 127.178111 35.712000 319.000000 127.178111 35.712000 325.000000 
 127.178333 35.712000 308.000000 127.178333 35.712000 315.000000 
 127.178556 35.712000 296.000000 127.178556 35.712000 302.000000 
 127.178667 35.712000 290.000000 127.178667 35.712000 295.000000 
 127.178778 35.712000 284.000000 127.178778 35.712000 288.000000 
 127.178889 35.712000 276.000000 127.178889 35.712000 281.000000 
 127.177778 35.712111 328.000000 127.177778 35.712111 320.000000 
 127.177889 35.712111 327.000000 127.177889 35.712111 320.000000 
 127.178000 35.712111 325.000000 127.178000 35.712111 320.000000 
 127.178111 35.712111 321.000000 127.178111 35.712111 320.000000 
 127.178333 35.712111 308.000000 127.178333 35.712111 313.000000 
 127.178556 35.712111 295.000000 127.178556 35.712111 301.000000 
 127.178667 35.712111 288.000000 127.178667 35.712111 293.000000 
 127.178778 35.712111 281.000000 127.178778 35.712111 285.000000 
 127.178889 35.712111 274.000000 127.178889 35.712111 276.000000 
 127.177778 35.712222 320.000000 127.177778 35.712222 314.000000 
 127.177889 35.712222 320.000000 127.177889 35.712222 314.000000 
 127.178000 35.712222 320.000000 127.178000 35.712222 314.000000 
 127.178111 35.712222 318.000000 127.178111 35.712222 315.000000 
 127.178333 35.712222 307.000000 127.178333 35.712222 310.000000 
 127.178556 35.712222 293.000000 127.178556 35.712222 300.000000 
 127.178667 35.712222 285.000000 127.178667 35.712222 289.000000 
 127.178778 35.712222 276.000000 127.178778 35.712222 281.000000 
 127.178889 35.712222 268.000000 127.178889 35.712222 273.000000 
 127.177778 35.712333 314.000000 127.177778 35.712333 305.000000 
 127.177889 35.712333 314.000000 127.177889 35.712333 305.000000 
 127.178000 35.712333 315.000000 127.178000 35.712333 306.000000 
 127.178111 35.712333 314.000000 127.178111 35.712333 307.000000 
 127.178333 35.712333 305.000000 127.178333 35.712333 305.000000 
 127.178556 35.712333 289.000000 127.178556 35.712333 293.000000 
 127.178667 35.712333 281.000000 127.178667 35.712333 283.000000 
 127.178778 35.712333 273.000000 127.178778 35.712333 275.000000 
 127.178889 35.712333 265.000000 127.178889 35.712333 267.000000 
 127.177889 35.712333 314.000000 127.177889 35.712333 305.000000 
 127.178000 35.712333 315.000000 127.178000 35.712333 306.000000 
 127.178111 35.712333 314.000000 127.178111 35.712333 307.000000 
 127.178222 35.712333 310.000000 127.178222 35.712333 307.000000 
 127.178444 35.712333 300.000000 127.178444 35.712333 301.000000 
 127.178667 35.712333 281.000000 127.178667 35.712333 283.000000 
 127.178778 35.712333 273.000000 127.178778 35.712333 275.000000 
 127.178889 35.712333 265.000000 127.178889 35.712333 267.000000 
 127.179000 35.712333 262.000000 127.179000 35.712333 263.000000 
 127.177889 35.712444 306.000000 127.177889 35.712444 299.000000 
 127.178000 35.712444 307.000000 127.178000 35.712444 300.000000 
 127.178111 35.712444 307.000000 127.178111 35.712444 301.000000 
 127.178222 35.712444 305.000000 127.178222 35.712444 302.000000 
 127.178444 35.712444 293.000000 127.178444 35.712444 296.000000 
 127.178667 35.712444 275.000000 127.178667 35.712444 279.000000 
 127.178778 35.712444 267.000000 127.178778 35.712444 271.000000 
 127.178889 35.712444 263.000000 127.178889 35.712444 264.000000 
 127.179000 35.712444 260.000000 127.179000 35.712444 261.000000 
 127.177889 35.712556 300.000000 127.177889 35.712556 293.000000 
 127.178000 35.712556 301.000000 127.178000 35.712556 294.000000 
 127.178111 35.712556 302.000000 127.178111 35.712556 294.000000 
 127.178222 35.712556 301.000000 127.178222 35.712556 294.000000 
 127.178444 35.712556 288.000000 127.178444 35.712556 288.000000 
 127.178667 35.712556 271.000000 127.178667 35.712556 273.000000 
 127.178778 35.712556 264.000000 127.178778 35.712556 265.000000 
 127.178889 35.712556 261.000000 127.178889 35.712556 262.000000 
 127.179000 35.712556 259.000000 127.179000 35.712556 259.000000 
 127.177889 35.712667 294.000000 127.177889 35.712667 289.000000 
 127.178000 35.712667 294.000000 127.178000 35.712667 290.000000 
 127.178111 35.712667 294.000000 127.178111 35.712667 290.000000 
 127.178222 35.712667 292.000000 127.178222 35.712667 289.000000 
 127.178444 35.712667 282.000000 127.178444 35.712667 283.000000 
 127.178667 35.712667 265.000000 127.178667 35.712667 267.000000 
 127.178778 35.712667 262.000000 127.178778 35.712667 263.000000 
 127.178889 35.712667 259.000000 127.178889 35.712667 261.000000 
 127.179000 35.712667 258.000000 127.179000 35.712667 259.000000 
 127.178000 35.712667 294.000000 127.178000 35.712667 290.000000 
 127.178111 35.712667 294.000000 127.178111 35.712667 290.000000 
 127.178222 35.712667 292.000000 127.178222 35.712667 289.000000 
 127.178333 35.712667 288.000000 127.178333 35.712667 287.000000 
 127.178556 35.712667 273.000000 127.178556 35.712667 278.000000 
 127.178778 35.712667 262.000000 127.178778 35.712667 263.000000 
 127.178889 35.712667 259.000000 127.178889 35.712667 261.000000 
 127.179000 35.712667 258.000000 127.179000 35.712667 259.000000 
 127.179111 35.712667 258.000000 127.179111 35.712667 258.000000 
 127.178000 35.712778 290.000000 127.178000 35.712778 284.000000 
 127.178111 35.712778 289.000000 127.178111 35.712778 283.000000 
 127.178222 35.712778 287.000000 127.178222 35.712778 281.000000 
 127.178333 35.712778 283.000000 127.178333 35.712778 278.000000 
 127.178556 35.712778 267.000000 127.178556 35.712778 266.000000 
 127.178778 35.712778 261.000000 127.178778 35.712778 259.000000 
 127.178889 35.712778 259.000000 127.178889 35.712778 259.000000 
 127.179000 35.712778 258.000000 127.179000 35.712778 258.000000 
 127.179111 35.712778 257.000000 127.179111 35.712778 257.000000 
 127.178000 35.712889 283.000000 127.178000 35.712889 279.000000 
 127.178111 35.712889 281.000000 127.178111 35.712889 278.000000 
 127.178222 35.712889 278.000000 127.178222 35.712889 276.000000 
 127.178333 35.712889 275.000000 127.178333 35.712889 273.000000 
 127.178556 35.712889 261.000000 127.178556 35.712889 262.000000 
 127.178778 35.712889 259.000000 127.178778 35.712889 258.000000 
 127.178889 35.712889 258.000000 127.178889 35.712889 257.000000 
 127.179000 35.712889 257.000000 127.179000 35.712889 256.000000 
 127.179111 35.712889 256.000000 127.179111 35.712889 256.000000 
 127.178111 35.712889 281.000000 127.178111 35.712889 278.000000 
 127.178222 35.712889 278.000000 127.178222 35.712889 276.000000 
 127.178333 35.712889 275.000000 127.178333 35.712889 273.000000 
 127.178444 35.712889 266.000000 127.178444 35.712889 267.000000 
 127.178667 35.712889 259.000000 127.178667 35.712889 259.000000 
 127.178889 35.712889 258.000000 127.178889 35.712889 257.000000 
 127.179000 35.712889 257.000000 127.179000 35.712889 256.000000 
 127.179111 35.712889 256.000000 127.179111 35.712889 256.000000 
 127.179222 35.712889 255.000000 127.179222 35.712889 255.000000 
 127.178111 35.713000 276.000000 127.178111 35.713000 273.000000 
 127.178222 35.713000 273.000000 127.178222 35.713000 270.000000 
 127.178333 35.713000 267.000000 127.178333 35.713000 265.000000 
 127.178444 35.713000 262.000000 127.178444 35.713000 261.000000 
 127.178667 35.713000 258.000000 127.178667 35.713000 258.000000 
 127.178889 35.713000 256.000000 127.178889 35.713000 255.000000 
 127.179000 35.713000 256.000000 127.179000 35.713000 255.000000 
 127.179111 35.713000 255.000000 127.179111 35.713000 255.000000 
 127.179222 35.713000 255.000000 127.179222 35.713000 255.000000 
 127.178111 35.713111 270.000000 127.178111 35.713111 264.000000 
 127.178222 35.713111 265.000000 127.178222 35.713111 260.000000 
 127.178333 35.713111 261.000000 127.178333 35.713111 258.000000 
 127.178444 35.713111 259.000000 127.178444 35.713111 256.000000 
 127.178667 35.713111 256.000000 127.178667 35.713111 255.000000 
 127.178889 35.713111 255.000000 127.178889 35.713111 255.000000 
 127.179000 35.713111 255.000000 127.179000 35.713111 255.000000 
 127.179111 35.713111 255.000000 127.179111 35.713111 255.000000 
 127.179222 35.713111 255.000000 127.179222 35.713111 255.000000 
 127.178111 35.713222 260.000000 127.178111 35.713222 259.000000 
 127.178222 35.713222 258.000000 127.178222 35.713222 258.000000 
 127.178333 35.713222 256.000000 127.178333 35.713222 256.000000 
 127.178444 35.713222 256.000000 127.178444 35.713222 255.000000 
 127.178667 35.713222 255.000000 127.178667 35.713222 255.000000 
 127.178889 35.713222 255.000000 127.178889 35.713222 255.000000 
 127.179000 35.713222 255.000000 127.179000 35.713222 255.000000 
 127.179111 35.713222 255.000000 127.179111 35.713222 255.000000 
 127.179222 35.713222 255.000000 127.179222 35.713222 255.000000 
 127.178222 35.713222 258.000000 127.178222 35.713222 258.000000 
 127.178333 35.713222 256.000000 127.178333 35.713222 256.000000 
 127.178444 35.713222 256.000000 127.178444 35.713222 255.000000 
 127.178556 35.713222 255.000000 127.178556 35.713222 255.000000 
 127.178778 35.713222 255.000000 127.178778 35.713222 255.000000 
 127.179000 35.713222 255.000000 127.179000 35.713222 255.000000 
 127.179111 35.713222 255.000000 127.179111 35.713222 255.000000 
 127.179222 35.713222 255.000000 127.179222 35.713222 255.000000 
 127.179333 35.713222 255.000000 127.179333 35.713222 255.000000 
 127.178222 35.713333 256.000000 127.178222 35.713333 255.000000 
 127.178333 35.713333 255.000000 127.178333 35.713333 255.000000 
 127.178444 35.713333 255.000000 127.178444 35.713333 255.000000 
 127.178556 35.713333 255.000000 127.178556 35.713333 255.000000 
 127.178778 35.713333 255.000000 127.178778 35.713333 255.000000 
 127.179000 35.713333 255.000000 127.179000 35.713333 254.000000 
 127.179111 35.713333 255.000000 127.179111 35.713333 254.000000 
 127.179222 35.713333 255.000000 127.179222 35.713333 254.000000 
 127.179333 35.713333 255.000000 127.179333 35.713333 254.000000 
 127.178222 35.713444 255.000000 127.178222 35.713444 255.000000 
 127.178333 35.713444 255.000000 127.178333 35.713444 255.000000 
 127.178444 35.713444 255.000000 127.178444 35.713444 255.000000 
 127.178556 35.713444 255.000000 127.178556 35.713444 255.000000 
 127.178778 35.713444 255.000000 127.178778 35.713444 254.000000 
 127.179000 35.713444 254.000000 127.179000 35.713444 254.000000 
 127.179111 35.713444 254.000000 127.179111 35.713444 254.000000 
 127.179222 35.713444 254.000000 127.179222 35.713444 254.000000 
 127.179333 35.713444 255.000000 127.179333 35.713444 254.000000 
 127.178222 35.713556 255.000000 127.178222 35.713556 255.000000 
 127.178333 35.713556 255.000000 127.178333 35.713556 255.000000 
 127.178444 35.713556 255.000000 127.178444 35.713556 255.000000 
 127.178556 35.713556 254.000000 127.178556 35.713556 254.000000 
 127.178778 35.713556 254.000000 127.178778 35.713556 254.000000 
 127.179000 35.713556 254.000000 127.179000 35.713556 254.000000 
 127.179111 35.713556 254.000000 127.179111 35.713556 254.000000 
 127.179222 35.713556 254.000000 127.179222 35.713556 254.000000 
 127.179333 35.713556 254.000000 127.179333 35.713556 254.000000 
 127.178333 35.713556 255.000000 127.178333 35.713556 255.000000 
 127.178444 35.713556 255.000000 127.178444 35.713556 255.000000 
 127.178556 35.713556 254.000000 127.178556 35.713556 254.000000 
 127.178667 35.713556 254.000000 127.178667 35.713556 254.000000 
 127.178889 35.713556 254.000000 127.178889 35.713556 254.000000 
 127.179111 35.713556 254.000000 127.179111 35.713556 254.000000 
 127.179222 35.713556 254.000000 127.179222 35.713556 254.000000 
 127.179333 35.713556 254.000000 127.179333 35.713556 254.000000 
 127.179444 35.713556 255.000000 127.179444 35.713556 254.000000 
 127.178333 35.713667 255.000000 127.178333 35.713667 254.000000 
 127.178444 35.713667 254.000000 127.178444 35.713667 254.000000 
 127.178556 35.713667 254.000000 127.178556 35.713667 254.000000 
 127.178667 35.713667 254.000000 127.178667 35.713667 254.000000 
 127.178889 35.713667 254.000000 127.178889 35.713667 254.000000 
 127.179111 35.713667 254.000000 127.179111 35.713667 254.000000 
 127.179222 35.713667 254.000000 127.179222 35.713667 254.000000 
 127.179333 35.713667 254.000000 127.179333 35.713667 254.000000 
 127.179444 35.713667 254.000000 127.179444 35.713667 254.000000 
 127.178333 35.713778 254.000000 127.178333 35.713778 254.000000 
 127.178444 35.713778 254.000000 127.178444 35.713778 254.000000 
 127.178556 35.713778 254.000000 127.178556 35.713778 253.000000 
 127.178667 35.713778 254.000000 127.178667 35.713778 254.000000 
 127.178889 35.713778 254.000000 127.178889 35.713778 254.000000 
 127.179111 35.713778 254.000000 127.179111 35.713778 254.000000 
 127.179222 35.713778 254.000000 127.179222 35.713778 254.000000 
 127.179333 35.713778 254.000000 127.179333 35.713778 254.000000 
 127.179444 35.713778 255.000000 127.179444 35.713778 254.000000 
 127.178333 35.713889 254.000000 127.178333 35.713889 253.000000 
 127.178444 35.713889 253.000000 127.178444 35.713889 253.000000 
 127.178556 35.713889 254.000000 127.178556 35.713889 253.000000 
 127.178667 35.713889 254.000000 127.178667 35.713889 253.000000 
 127.178889 35.713889 254.000000 127.178889 35.713889 253.000000 
 127.179111 35.713889 254.000000 127.179111 35.713889 254.000000 
 127.179222 35.713889 254.000000 127.179222 35.713889 254.000000 
 127.179333 35.713889 254.000000 127.179333 35.713889 254.000000 
 127.179444 35.713889 256.000000 127.179444 35.713889 254.000000 
 127.178444 35.713889 253.000000 127.178444 35.713889 253.000000 
 127.178556 35.713889 254.000000 127.178556 35.713889 253.000000 
 127.178667 35.713889 254.000000 127.178667 35.713889 253.000000 
 127.178778 35.713889 254.000000 127.178778 35.713889 253.000000 
 127.179000 35.713889 254.000000 127.179000 35.713889 254.000000 
 127.179222 35.713889 254.000000 127.179222 35.713889 254.000000 
 127.179333 35.713889 254.000000 127.179333 35.713889 254.000000 
 127.179444 35.713889 256.000000 127.179444 35.713889 254.000000 
 127.179556 35.713889 260.000000 127.179556 35.713889 257.000000 
 127.178444 35.714000 253.000000 127.178444 35.714000 252.000000 
 127.178556 35.714000 253.000000 127.178556 35.714000 252.000000 
 127.178667 35.714000 253.000000 127.178667 35.714000 252.000000 
 127.178778 35.714000 253.000000 127.178778 35.714000 252.000000 
 127.179000 35.714000 254.000000 127.179000 35.714000 253.000000 
 127.179222 35.714000 254.000000 127.179222 35.714000 253.000000 
 127.179333 35.714000 254.000000 127.179333 35.714000 254.000000 
 127.179444 35.714000 257.000000 127.179444 35.714000 255.000000 
 127.179556 35.714000 261.000000 127.179556 35.714000 258.000000 
 127.178444 35.714111 252.000000 127.178444 35.714111 252.000000 
 127.178556 35.714111 252.000000 127.178556 35.714111 252.000000 
 127.178667 35.714111 252.000000 127.178667 35.714111 252.000000 
 127.178778 35.714111 253.000000 127.178778 35.714111 252.000000 
 127.179000 35.714111 253.000000 127.179000 35.714111 252.000000 
 127.179222 35.714111 254.000000 127.179222 35.714111 253.000000 
 127.179333 35.714111 255.000000 127.179333 35.714111 254.000000 
 127.179444 35.714111 258.000000 127.179444 35.714111 255.000000 
 127.179556 35.714111 262.000000 127.179556 35.714111 258.000000 
 127.178556 35.714111 252.000000 127.178556 35.714111 252.000000 
 127.178667 35.714111 252.000000 127.178667 35.714111 252.000000 
 127.178778 35.714111 253.000000 127.178778 35.714111 252.000000 
 127.178889 35.714111 253.000000 127.178889 35.714111 252.000000 
 127.179111 35.714111 253.000000 127.179111 35.714111 253.000000 
 127.179333 35.714111 255.000000 127.179333 35.714111 254.000000 
 127.179444 35.714111 258.000000 127.179444 35.714111 255.000000 
 127.179556 35.714111 262.000000 127.179556 35.714111 258.000000 
 127.179667 35.714111 266.000000 127.179667 35.714111 262.000000 
 127.178556 35.714222 252.000000 127.178556 35.714222 251.000000 
 127.178667 35.714222 252.000000 127.178667 35.714222 251.000000 
 127.178778 35.714222 252.000000 127.178778 35.714222 251.000000 
 127.178889 35.714222 252.000000 127.178889 35.714222 252.000000 
 127.179111 35.714222 253.000000 127.179111 35.714222 253.000000 
 127.179333 35.714222 255.000000 127.179333 35.714222 254.000000 
 127.179444 35.714222 258.000000 127.179444 35.714222 255.000000 
 127.179556 35.714222 262.000000 127.179556 35.714222 258.000000 
 127.179667 35.714222 266.000000 127.179667 35.714222 261.000000 
 127.178556 35.714333 251.000000 127.178556 35.714333 250.000000 
 127.178667 35.714333 251.000000 127.178667 35.714333 251.000000 
 127.178778 35.714333 252.000000 127.178778 35.714333 251.000000 
 127.178889 35.714333 252.000000 127.178889 35.714333 252.000000 
 127.179111 35.714333 254.000000 127.179111 35.714333 253.000000 
 127.179333 35.714333 255.000000 127.179333 35.714333 254.000000 
 127.179444 35.714333 258.000000 127.179444 35.714333 255.000000 
 127.179556 35.714333 261.000000 127.179556 35.714333 257.000000 
 127.179667 35.714333 264.000000 127.179667 35.714333 259.000000 
 127.178556 35.714444 251.000000 127.178556 35.714444 250.000000 
 127.178667 35.714444 251.000000 127.178667 35.714444 250.000000 
 127.178778 35.714444 252.000000 127.178778 35.714444 250.000000 
 127.178889 35.714444 252.000000 127.178889 35.714444 251.000000 
 127.179111 35.714444 253.000000 127.179111 35.714444 253.000000 
 127.179333 35.714444 255.000000 127.179333 35.714444 254.000000 
 127.179444 35.714444 257.000000 127.179444 35.714444 254.000000 
 127.179556 35.714444 259.000000 127.179556 35.714444 254.000000 
 127.179667 35.714444 262.000000 127.179667 35.714444 256.000000 
 127.178667 35.714444 251.000000 127.178667 35.714444 250.000000 
 127.178778 35.714444 252.000000 127.178778 35.714444 250.000000 
 127.178889 35.714444 252.000000 127.178889 35.714444 251.000000 
 127.179000 35.714444 253.000000 127.179000 35.714444 252.000000 
 127.179222 35.714444 254.000000 127.179222 35.714444 253.000000 
 127.179444 35.714444 257.000000 127.179444 35.714444 254.000000 
 127.179556 35.714444 259.000000 127.179556 35.714444 254.000000 
 127.179667 35.714444 262.000000 127.179667 35.714444 256.000000 
 127.179778 35.714444 265.000000 127.179778 35.714444 258.000000 
 127.178667 35.714556 250.000000 127.178667 35.714556 250.000000 
 127.178778 35.714556 251.000000 127.178778 35.714556 250.000000 
 127.178889 35.714556 252.000000 127.178889 35.714556 251.000000 
 127.179000 35.714556 253.000000 127.179000 35.714556 252.000000 
 127.179222 35.714556 254.000000 127.179222 35.714556 253.000000 
 127.179444 35.714556 254.000000 127.179444 35.714556 254.000000 
 127.179556 35.714556 256.000000 127.179556 35.714556 254.000000 
 127.179667 35.714556 258.000000 127.179667 35.714556 254.000000 
 127.179778 35.714556 260.000000 127.179778 35.714556 255.000000 
 127.178667 35.714667 250.000000 127.178667 35.714667 250.000000 
 127.178778 35.714667 251.000000 127.178778 35.714667 250.000000 
 127.178889 35.714667 252.000000 127.178889 35.714667 250.000000 
 127.179000 35.714667 252.000000 127.179000 35.714667 251.000000 
 127.179222 35.714667 253.000000 127.179222 35.714667 253.000000 
 127.179444 35.714667 254.000000 127.179444 35.714667 253.000000 
 127.179556 35.714667 254.000000 127.179556 35.714667 253.000000 
 127.179667 35.714667 255.000000 127.179667 35.714667 253.000000 
 127.179778 35.714667 257.000000 127.179778 35.714667 254.000000 
 127.178667 35.714778 250.000000 127.178667 35.714778 250.000000 
 127.178778 35.714778 250.000000 127.178778 35.714778 250.000000 
 127.178889 35.714778 251.000000 127.178889 35.714778 250.000000 
 127.179000 35.714778 252.000000 127.179000 35.714778 250.000000 
 127.179222 35.714778 253.000000 127.179222 35.714778 251.000000 
 127.179444 35.714778 253.000000 127.179444 35.714778 251.000000 
 127.179556 35.714778 253.000000 127.179556 35.714778 251.000000 
 127.179667 35.714778 254.000000 127.179667 35.714778 252.000000 
 127.179778 35.714778 254.000000 127.179778 35.714778 252.000000 
 127.178778 35.714778 250.000000 127.178778 35.714778 250.000000 
 127.178889 35.714778 251.000000 127.178889 35.714778 250.000000 
 127.179000 35.714778 252.000000 127.179000 35.714778 250.000000 
 127.179111 35.714778 253.000000 127.179111 35.714778 252.000000 
 127.179333 35.714778 253.000000 127.179333 35.714778 251.000000 
 127.179556 35.714778 253.000000 127.179556 35.714778 251.000000 
 127.179667 35.714778 254.000000 127.179667 35.714778 252.000000 
 127.179778 35.714778 254.000000 127.179778 35.714778 252.000000 
 127.179889 35.714778 254.000000 127.179889 35.714778 253.000000 
 127.178778 35.714889 250.000000 127.178778 35.714889 250.000000 
 127.178889 35.714889 250.000000 127.178889 35.714889 250.000000 
 127.179000 35.714889 252.000000 127.179000 35.714889 250.000000 
 127.179111 35.714889 251.000000 127.179111 35.714889 250.000000 
 127.179333 35.714889 251.000000 127.179333 35.714889 250.000000 
 127.179556 35.714889 252.000000 127.179556 35.714889 251.000000 
 127.179667 35.714889 252.000000 127.179667 35.714889 251.000000 
 127.179778 35.714889 253.000000 127.179778 35.714889 252.000000 
 127.179889 35.714889 253.000000 127.179889 35.714889 252.000000 
 127.178778 35.715000 250.000000 127.178778 35.715000 250.000000 
 127.178889 35.715000 250.000000 127.178889 35.715000 250.000000 
 127.179000 35.715000 250.000000 127.179000 35.715000 250.000000 
 127.179111 35.715000 250.000000 127.179111 35.715000 250.000000 
 127.179333 35.715000 250.000000 127.179333 35.715000 250.000000 
 127.179556 35.715000 251.000000 127.179556 35.715000 250.000000 
 127.179667 35.715000 252.000000 127.179667 35.715000 250.000000 
 127.179778 35.715000 252.000000 127.179778 35.715000 250.000000 
 127.179889 35.715000 252.000000 127.179889 35.715000 251.000000 
 127.178889 35.715000 250.000000 127.178889 35.715000 250.000000 
 127.179000 35.715000 250.000000 127.179000 35.715000 250.000000 
 127.179111 35.715000 250.000000 127.179111 35.715000 250.000000 
 127.179222 35.715000 250.000000 127.179222 35.715000 250.000000 
 127.179444 35.715000 251.000000 127.179444 35.715000 250.000000 
 127.179667 35.715000 252.000000 127.179667 35.715000 250.000000 
 127.179778 35.715000 252.000000 127.179778 35.715000 250.000000 
 127.179889 35.715000 252.000000 127.179889 35.715000 251.000000 
 127.180000 35.715000 253.000000 127.180000 35.715000 251.000000 
 127.178889 35.715111 250.000000 127.178889 35.715111 250.000000 
 127.179000 35.715111 250.000000 127.179000 35.715111 250.000000 
 127.179111 35.715111 250.000000 127.179111 35.715111 250.000000 
 127.179222 35.715111 250.000000 127.179222 35.715111 250.000000 
 127.179444 35.715111 250.000000 127.179444 35.715111 250.000000 
 127.179667 35.715111 250.000000 127.179667 35.715111 250.000000 
 127.179778 35.715111 251.000000 127.179778 35.715111 250.000000 
 127.179889 35.715111 251.000000 127.179889 35.715111 250.000000 
 127.180000 35.715111 252.000000 127.180000 35.715111 251.000000 
 127.178889 35.715222 250.000000 127.178889 35.715222 250.000000 
 127.179000 35.715222 250.000000 127.179000 35.715222 250.000000 
 127.179111 35.715222 250.000000 127.179111 35.715222 250.000000 
 127.179222 35.715222 250.000000 127.179222 35.715222 250.000000 
 127.179444 35.715222 250.000000 127.179444 35.715222 250.000000 
 127.179667 35.715222 250.000000 127.179667 35.715222 250.000000 
 127.179778 35.715222 250.000000 127.179778 35.715222 250.000000 
 127.179889 35.715222 251.000000 127.179889 35.715222 250.000000 
 127.180000 35.715222 252.000000 127.180000 35.715222 251.000000 
 127.178889 35.715333 250.000000 127.178889 35.715333 250.000000 
 127.179000 35.715333 250.000000 127.179000 35.715333 250.000000 
 127.179111 35.715333 250.000000 127.179111 35.715333 250.000000 
 127.179222 35.715333 250.000000 127.179222 35.715333 250.000000 
 127.179444 35.715333 250.000000 127.179444 35.715333 250.000000 
 127.179667 35.715333 250.000000 127.179667 35.715333 250.000000 
 127.179778 35.715333 250.000000 127.179778 35.715333 250.000000 
 127.179889 35.715333 251.000000 127.179889 35.715333 251.000000 
 127.180000 35.715333 252.000000 127.180000 35.715333 251.000000 
 127.179000 35.715333 250.000000 127.179000 35.715333 250.000000 
 127.179111 35.715333 250.000000 127.179111 35.715333 250.000000 
 127.179222 35.715333 250.000000 127.179222 35.715333 250.000000 
 127.179333 35.715333 250.000000 127.179333 35.715333 250.000000 
 127.179556 35.715333 250.000000 127.179556 35.715333 250.000000 
 127.179778 35.715333 250.000000 127.179778 35.715333 250.000000 
 127.179889 35.715333 251.000000 127.179889 35.715333 251.000000 
 127.180000 35.715333 252.000000 127.180000 35.715333 251.000000 
 127.180111 35.715333 252.000000 127.180111 35.715333 252.000000 
 127.179000 35.715444 250.000000 127.179000 35.715444 250.000000 
 127.179111 35.715444 250.000000 127.179111 35.715444 250.000000 
 127.179222 35.715444 250.000000 127.179222 35.715444 250.000000 
 127.179333 35.715444 250.000000 127.179333 35.715444 250.000000 
 127.179556 35.715444 250.000000 127.179556 35.715444 250.000000 
 127.179778 35.715444 251.000000 127.179778 35.715444 251.000000 
 127.179889 35.715444 251.000000 127.179889 35.715444 252.000000 
 127.180000 35.715444 252.000000 127.180000 35.715444 252.000000 
 127.180111 35.715444 252.000000 127.180111 35.715444 252.000000 
 127.179000 35.715556 250.000000 127.179000 35.715556 250.000000 
 127.179111 35.715556 250.000000 127.179111 35.715556 250.000000 
 127.179222 35.715556 250.000000 127.179222 35.715556 250.000000 
 127.179333 35.715556 250.000000 127.179333 35.715556 250.000000 
 127.179556 35.715556 251.000000 127.179556 35.715556 251.000000 
 127.179778 35.715556 252.000000 127.179778 35.715556 251.000000 
 127.179889 35.715556 252.000000 127.179889 35.715556 252.000000 
 127.180000 35.715556 252.000000 127.180000 35.715556 252.000000 
 127.180111 35.715556 252.000000 127.180111 35.715556 252.000000 
 127.179000 35.715667 250.000000 127.179000 35.715667 250.000000 
 127.179111 35.715667 250.000000 127.179111 35.715667 251.000000 
 127.179222 35.715667 250.000000 127.179222 35.715667 251.000000 
 127.179333 35.715667 250.000000 127.179333 35.715667 251.000000 
 127.179556 35.715667 251.000000 127.179556 35.715667 251.000000 
 127.179778 35.715667 252.000000 127.179778 35.715667 252.000000 
 127.179889 35.715667 252.000000 127.179889 35.715667 252.000000 
 127.180000 35.715667 252.000000 127.180000 35.715667 252.000000 
 127.180111 35.715667 252.000000 127.180111 35.715667 252.000000 
 127.179111 35.715667 250.000000 127.179111 35.715667 251.000000 
 127.179222 35.715667 250.000000 127.179222 35.715667 251.000000 
 127.179333 35.715667 250.000000 127.179333 35.715667 251.000000 
 127.179444 35.715667 251.000000 127.179444 35.715667 251.000000 
 127.179667 35.715667 251.000000 127.179667 35.715667 251.000000 
 127.179889 35.715667 252.000000 127.179889 35.715667 252.000000 
 127.180000 35.715667 252.000000 127.180000 35.715667 252.000000 
 127.180111 35.715667 252.000000 127.180111 35.715667 252.000000 
 127.180222 35.715667 252.000000 127.180222 35.715667 252.000000 
 127.179111 35.715778 251.000000 127.179111 35.715778 251.000000 
 127.179222 35.715778 251.000000 127.179222 35.715778 251.000000 
 127.179333 35.715778 251.000000 127.179333 35.715778 251.000000 
 127.179444 35.715778 251.000000 127.179444 35.715778 251.000000 
 127.179667 35.715778 252.000000 127.179667 35.715778 251.000000 
 127.179889 35.715778 252.000000 127.179889 35.715778 252.000000 
 127.180000 35.715778 252.000000 127.180000 35.715778 252.000000 
 127.180111 35.715778 252.000000 127.180111 35.715778 252.000000 
 127.180222 35.715778 252.000000 127.180222 35.715778 252.000000 
 127.179111 35.715889 251.000000 127.179111 35.715889 252.000000 
 127.179222 35.715889 251.000000 127.179222 35.715889 252.000000 
 127.179333 35.715889 251.000000 127.179333 35.715889 252.000000 
 127.179444 35.715889 251.000000 127.179444 35.715889 252.000000 
 127.179667 35.715889 252.000000 127.179667 35.715889 252.000000 
 127.179889 35.715889 252.000000 127.179889 35.715889 252.000000 
 127.180000 35.715889 252.000000 127.180000 35.715889 252.000000 
 127.180111 35.715889 252.000000 127.180111 35.715889 253.000000 
 127.180222 35.715889 252.000000 127.180222 35.715889 253.000000 
 127.179222 35.715889 251.000000 127.179222 35.715889 252.000000 
 127.179333 35.715889 251.000000 127.179333 35.715889 252.000000 
 127.179444 35.715889 251.000000 127.179444 35.715889 252.000000 
 127.179556 35.715889 251.000000 127.179556 35.715889 252.000000 
 127.179778 35.715889 252.000000 127.179778 35.715889 252.000000 
 127.180000 35.715889 252.000000 127.180000 35.715889 252.000000 
 127.180111 35.715889 252.000000 127.180111 35.715889 253.000000 
 127.180222 35.715889 252.000000 127.180222 35.715889 253.000000 
 127.180333 35.715889 253.000000 127.180333 35.715889 253.000000 
 127.179222 35.716000 252.000000 127.179222 35.716000 253.000000 
 127.179333 35.716000 252.000000 127.179333 35.716000 252.000000 
 127.179444 35.716000 252.000000 127.179444 35.716000 253.000000 
 127.179556 35.716000 252.000000 127.179556 35.716000 253.000000 
 127.179778 35.716000 252.000000 127.179778 35.716000 253.000000 
 127.180000 35.716000 253.000000 127.180000 35.716000 253.000000 
 127.180111 35.716000 253.000000 127.180111 35.716000 253.000000 
 127.180222 35.716000 253.000000 127.180222 35.716000 253.000000 
 127.180333 35.716000 253.000000 127.180333 35.716000 253.000000 
 127.179222 35.716111 252.000000 127.179222 35.716111 254.000000 
 127.179333 35.716111 253.000000 127.179333 35.716111 254.000000 
 127.179444 35.716111 253.000000 127.179444 35.716111 253.000000 
 127.179556 35.716111 253.000000 127.179556 35.716111 254.000000 
 127.179778 35.716111 253.000000 127.179778 35.716111 254.000000 
 127.180000 35.716111 253.000000 127.180000 35.716111 254.000000 
 127.180111 35.716111 253.000000 127.180111 35.716111 253.000000 
 127.180222 35.716111 253.000000 127.180222 35.716111 253.000000 
 127.180333 35.716111 253.000000 127.180333 35.716111 253.000000 
 127.179222 35.716222 254.000000 127.179222 35.716222 255.000000 
 127.179333 35.716222 253.000000 127.179333 35.716222 255.000000 
 127.179444 35.716222 254.000000 127.179444 35.716222 254.000000 
 127.179556 35.716222 254.000000 127.179556 35.716222 254.000000 
 127.179778 35.716222 254.000000 127.179778 35.716222 254.000000 
 127.180000 35.716222 253.000000 127.180000 35.716222 254.000000 
 127.180111 35.716222 253.000000 127.180111 35.716222 254.000000 
 127.180222 35.716222 253.000000 127.180222 35.716222 254.000000 
 127.180333 35.716222 253.000000 127.180333 35.716222 254.000000 
 127.179333 35.716222 253.000000 127.179333 35.716222 255.000000 
 127.179444 35.716222 254.000000 127.179444 35.716222 254.000000 
 127.179556 35.716222 254.000000 127.179556 35.716222 254.000000 
 127.179667 35.716222 254.000000 127.179667 35.716222 254.000000 
 127.179889 35.716222 254.000000 127.179889 35.716222 254.000000 
 127.180111 35.716222 253.000000 127.180111 35.716222 254.000000 
 127.180222 35.716222 253.000000 127.180222 35.716222 254.000000 
 127.180333 35.716222 253.000000 127.180333 35.716222 254.000000 
 127.180444 35.716222 254.000000 127.180444 35.716222 254.000000 
 127.179333 35.716333 254.000000 127.179333 35.716333 256.000000 
 127.179444 35.716333 254.000000 127.179444 35.716333 256.000000 
 127.179556 35.716333 254.000000 127.179556 35.716333 255.000000 
 127.179667 35.716333 254.000000 127.179667 35.716333 255.000000 
 127.179889 35.716333 254.000000 127.179889 35.716333 254.000000 
 127.180111 35.716333 254.000000 127.180111 35.716333 254.000000 
 127.180222 35.716333 254.000000 127.180222 35.716333 254.000000 
 127.180333 35.716333 254.000000 127.180333 35.716333 254.000000 
 127.180444 35.716333 254.000000 127.180444 35.716333 254.000000 
 127.179333 35.716444 256.000000 127.179333 35.716444 258.000000 
 127.179444 35.716444 255.000000 127.179444 35.716444 258.000000 
 127.179556 35.716444 255.000000 127.179556 35.716444 257.000000 
 127.179667 35.716444 254.000000 127.179667 35.716444 257.000000 
 127.179889 35.716444 254.000000 127.179889 35.716444 256.000000 
 127.180111 35.716444 254.000000 127.180111 35.716444 254.000000 
 127.180222 35.716444 254.000000 127.180222 35.716444 254.000000 
 127.180333 35.716444 254.000000 127.180333 35.716444 254.000000 
 127.180444 35.716444 254.000000 127.180444 35.716444 254.000000 
 127.179333 35.716556 258.000000 127.179333 35.716556 259.000000 
 127.179444 35.716556 257.000000 127.179444 35.716556 259.000000 
 127.179556 35.716556 257.000000 127.179556 35.716556 259.000000 
 127.179667 35.716556 256.000000 127.179667 35.716556 258.000000 
 127.179889 35.716556 255.000000 127.179889 35.716556 257.000000 
 127.180111 35.716556 254.000000 127.180111 35.716556 256.000000 
 127.180222 35.716556 254.000000 127.180222 35.716556 255.000000 
 127.180333 35.716556 254.000000 127.180333 35.716556 255.000000 
 127.180444 35.716556 255.000000 127.180444 35.716556 255.000000 
 127.179444 35.716556 257.000000 127.179444 35.716556 259.000000 
 127.179556 35.716556 257.000000 127.179556 35.716556 259.000000 
 127.179667 35.716556 256.000000 127.179667 35.716556 258.000000 
 127.179778 35.716556 256.000000 127.179778 35.716556 257.000000 
 127.180000 35.716556 254.000000 127.180000 35.716556 257.000000 
 127.180222 35.716556 254.000000 127.180222 35.716556 255.000000 
 127.180333 35.716556 254.000000 127.180333 35.716556 255.000000 
 127.180444 35.716556 255.000000 127.180444 35.716556 255.000000 
 127.180556 35.716556 255.000000 127.180556 35.716556 255.000000 
 127.179444 35.716667 259.000000 127.179444 35.716667 263.000000 
 127.179556 35.716667 258.000000 127.179556 35.716667 262.000000 
 127.179667 35.716667 257.000000 127.179667 35.716667 261.000000 
 127.179778 35.716667 257.000000 127.179778 35.716667 260.000000 
 127.180000 35.716667 256.000000 127.180000 35.716667 259.000000 
 127.180222 35.716667 255.000000 127.180222 35.716667 257.000000 
 127.180333 35.716667 255.000000 127.180333 35.716667 257.000000 
 127.180444 35.716667 255.000000 127.180444 35.716667 257.000000 
 127.180556 35.716667 255.000000 127.180556 35.716667 257.000000 
 127.179444 35.716778 262.000000 127.179444 35.716778 266.000000 
 127.179556 35.716778 261.000000 127.179556 35.716778 266.000000 
 127.179667 35.716778 260.000000 127.179667 35.716778 265.000000 
 127.179778 35.716778 260.000000 127.179778 35.716778 263.000000 
 127.180000 35.716778 258.000000 127.180000 35.716778 261.000000 
 127.180222 35.716778 257.000000 127.180222 35.716778 259.000000 
 127.180333 35.716778 257.000000 127.180333 35.716778 258.000000 
 127.180444 35.716778 257.000000 127.180444 35.716778 258.000000 
 127.180556 35.716778 257.000000 127.180556 35.716778 258.000000 
 127.179556 35.716778 261.000000 127.179556 35.716778 266.000000 
 127.179667 35.716778 260.000000 127.179667 35.716778 265.000000 
 127.179778 35.716778 260.000000 127.179778 35.716778 263.000000 
 127.179889 35.716778 259.000000 127.179889 35.716778 262.000000 
 127.180111 35.716778 257.000000 127.180111 35.716778 260.000000 
 127.180333 35.716778 257.000000 127.180333 35.716778 258.000000 
 127.180444 35.716778 257.000000 127.180444 35.716778 258.000000 
 127.180556 35.716778 257.000000 127.180556 35.716778 258.000000 
 127.180667 35.716778 257.000000 127.180667 35.716778 258.000000 
 127.179556 35.716889 265.000000 127.179556 35.716889 269.000000 
 127.179667 35.716889 263.000000 127.179667 35.716889 268.000000 
 127.179778 35.716889 262.000000 127.179778 35.716889 266.000000 
 127.179889 35.716889 261.000000 127.179889 35.716889 264.000000 
 127.180111 35.716889 259.000000 127.180111 35.716889 261.000000 
 127.180333 35.716889 258.000000 127.180333 35.716889 260.000000 
 127.180444 35.716889 258.000000 127.180444 35.716889 259.000000 
 127.180556 35.716889 258.000000 127.180556 35.716889 259.000000 
 127.180667 35.716889 258.000000 127.180667 35.716889 259.000000 
 127.179556 35.717000 268.000000 127.179556 35.717000 272.000000 
 127.179667 35.717000 266.000000 127.179667 35.717000 269.000000 
 127.179778 35.717000 264.000000 127.179778 35.717000 266.000000 
 127.179889 35.717000 263.000000 127.179889 35.717000 265.000000 
 127.180111 35.717000 260.000000 127.180111 35.717000 263.000000 
 127.180333 35.717000 259.000000 127.180333 35.717000 261.000000 
 127.180444 35.717000 259.000000 127.180444 35.717000 260.000000 
 127.180556 35.717000 259.000000 127.180556 35.717000 259.000000 
 127.180667 35.717000 258.000000 127.180667 35.717000 259.000000 
 127.179556 35.717111 269.000000 127.179556 35.717111 275.000000 
 127.179667 35.717111 266.000000 127.179667 35.717111 272.000000 
 127.179778 35.717111 265.000000 127.179778 35.717111 268.000000 
 127.179889 35.717111 264.000000 127.179889 35.717111 266.000000 
 127.180111 35.717111 262.000000 127.180111 35.717111 264.000000 
 127.180333 35.717111 260.000000 127.180333 35.717111 262.000000 
 127.180444 35.717111 259.000000 127.180444 35.717111 261.000000 
 127.180556 35.717111 259.000000 127.180556 35.717111 260.000000 
 127.180667 35.717111 258.000000 127.180667 35.717111 259.000000 
 127.179667 35.717111 266.000000 127.179667 35.717111 272.000000 
 127.179778 35.717111 265.000000 127.179778 35.717111 268.000000 
 127.179889 35.717111 264.000000 127.179889 35.717111 266.000000 
 127.180000 35.717111 263.000000 127.180000 35.717111 265.000000 
 127.180222 35.717111 261.000000 127.180222 35.717111 263.000000 
 127.180444 35.717111 259.000000 127.180444 35.717111 261.000000 
 127.180556 35.717111 259.000000 127.180556 35.717111 260.000000 
 127.180667 35.717111 258.000000 127.180667 35.717111 259.000000 
 127.180778 35.717111 258.000000 127.180778 35.717111 259.000000 
 127.179667 35.717222 268.000000 127.179667 35.717222 273.000000 
 127.179778 35.717222 266.000000 127.179778 35.717222 269.000000 
 127.179889 35.717222 265.000000 127.179889 35.717222 267.000000 
 127.180000 35.717222 264.000000 127.180000 35.717222 265.000000 
 127.180222 35.717222 262.000000 127.180222 35.717222 263.000000 
 127.180444 35.717222 260.000000 127.180444 35.717222 261.000000 
 127.180556 35.717222 259.000000 127.180556 35.717222 260.000000 
 127.180667 35.717222 259.000000 127.180667 35.717222 260.000000 
 127.180778 35.717222 259.000000 127.180778 35.717222 259.000000 
 127.179667 35.717333 269.000000 127.179667 35.717333 275.000000 
 127.179778 35.717333 267.000000 127.179778 35.717333 271.000000 
 127.179889 35.717333 265.000000 127.179889 35.717333 268.000000 
 127.180000 35.717333 264.000000 127.180000 35.717333 266.000000 
 127.180222 35.717333 262.000000 127.180222 35.717333 264.000000 
 127.180444 35.717333 260.000000 127.180444 35.717333 262.000000 
 127.180556 35.717333 260.000000 127.180556 35.717333 261.000000 
 127.180667 35.717333 259.000000 127.180667 35.717333 260.000000 
 127.180778 35.717333 259.000000 127.180778 35.717333 260.000000 
 127.179667 35.717444 271.000000 127.179667 35.717444 277.000000 
 127.179778 35.717444 268.000000 127.179778 35.717444 272.000000 
 127.179889 35.717444 266.000000 127.179889 35.717444 269.000000 
 127.180000 35.717444 265.000000 127.180000 35.717444 267.000000 
 127.180222 35.717444 263.000000 127.180222 35.717444 264.000000 
 127.180444 35.717444 261.000000 127.180444 35.717444 262.000000 
 127.180556 35.717444 260.000000 127.180556 35.717444 261.000000 
 127.180667 35.717444 260.000000 127.180667 35.717444 260.000000 
 127.180778 35.717444 260.000000 127.180778 35.717444 260.000000 
 127.179778 35.717444 268.000000 127.179778 35.717444 272.000000 
 127.179889 35.717444 266.000000 127.179889 35.717444 269.000000 
 127.180000 35.717444 265.000000 127.180000 35.717444 267.000000 
 127.180111 35.717444 264.000000 127.180111 35.717444 266.000000 
 127.180333 35.717444 262.000000 127.180333 35.717444 263.000000 
 127.180556 35.717444 260.000000 127.180556 35.717444 261.000000 
 127.180667 35.717444 260.000000 127.180667 35.717444 260.000000 
 127.180778 35.717444 260.000000 127.180778 35.717444 260.000000 
 127.180889 35.717444 260.000000 127.180889 35.717444 260.000000 
 127.179778 35.717556 269.000000 127.179778 35.717556 274.000000 
 127.179889 35.717556 267.000000 127.179889 35.717556 271.000000 
 127.180000 35.717556 266.000000 127.180000 35.717556 269.000000 
 127.180111 35.717556 264.000000 127.180111 35.717556 267.000000 
 127.180333 35.717556 262.000000 127.180333 35.717556 264.000000 
 127.180556 35.717556 260.000000 127.180556 35.717556 262.000000 
 127.180667 35.717556 260.000000 127.180667 35.717556 261.000000 
 127.180778 35.717556 260.000000 127.180778 35.717556 260.000000 
 127.180889 35.717556 260.000000 127.180889 35.717556 260.000000 
 127.179778 35.717667 271.000000 127.179778 35.717667 276.000000 
 127.179889 35.717667 269.000000 127.179889 35.717667 272.000000 
 127.180000 35.717667 267.000000 127.180000 35.717667 270.000000 
 127.180111 35.717667 266.000000 127.180111 35.717667 268.000000 
 127.180333 35.717667 263.000000 127.180333 35.717667 265.000000 
 127.180556 35.717667 261.000000 127.180556 35.717667 263.000000 
 127.180667 35.717667 260.000000 127.180667 35.717667 262.000000 
 127.180778 35.717667 260.000000 127.180778 35.717667 261.000000 
 127.180889 35.717667 260.000000 127.180889 35.717667 260.000000 
 127.179889 35.717667 269.000000 127.179889 35.717667 272.000000 
 127.180000 35.717667 267.000000 127.180000 35.717667 270.000000 
 127.180111 35.717667 266.000000 127.180111 35.717667 268.000000 
 127.180222 35.717667 264.000000 127.180222 35.717667 267.000000 
 127.180444 35.717667 262.000000 127.180444 35.717667 264.000000 
 127.180667 35.717667 260.000000 127.180667 35.717667 262.000000 
 127.180778 35.717667 260.000000 127.180778 35.717667 261.000000 
 127.180889 35.717667 260.000000 127.180889 35.717667 260.000000 
 127.181000 35.717667 260.000000 127.181000 35.717667 260.000000 
 127.179889 35.717778 270.000000 127.179889 35.717778 274.000000 
 127.180000 35.717778 268.000000 127.180000 35.717778 271.000000 
 127.180111 35.717778 267.000000 127.180111 35.717778 269.000000 
 127.180222 35.717778 265.000000 127.180222 35.717778 268.000000 
 127.180444 35.717778 263.000000 127.180444 35.717778 266.000000 
 127.180667 35.717778 261.000000 127.180667 35.717778 263.000000 
 127.180778 35.717778 260.000000 127.180778 35.717778 262.000000 
 127.180889 35.717778 260.000000 127.180889 35.717778 261.000000 
 127.181000 35.717778 260.000000 127.181000 35.717778 260.000000 
 127.179889 35.717889 271.000000 127.179889 35.717889 274.000000 
 127.180000 35.717889 269.000000 127.180000 35.717889 272.000000 
 127.180111 35.717889 268.000000 127.180111 35.717889 270.000000 
 127.180222 35.717889 267.000000 127.180222 35.717889 269.000000 
 127.180444 35.717889 264.000000 127.180444 35.717889 266.000000 
 127.180667 35.717889 262.000000 127.180667 35.717889 264.000000 
 127.180778 35.717889 261.000000 127.180778 35.717889 263.000000 
 127.180889 35.717889 260.000000 127.180889 35.717889 262.000000 
 127.181000 35.717889 260.000000 127.181000 35.717889 261.000000 
 127.179889 35.718000 272.000000 127.179889 35.718000 275.000000 
 127.180000 35.718000 270.000000 127.180000 35.718000 273.000000 
 127.180111 35.718000 269.000000 127.180111 35.718000 271.000000 
 127.180222 35.718000 268.000000 127.180222 35.718000 270.000000 
 127.180444 35.718000 265.000000 127.180444 35.718000 267.000000 
 127.180667 35.718000 263.000000 127.180667 35.718000 265.000000 
 127.180778 35.718000 262.000000 127.180778 35.718000 264.000000 
 127.180889 35.718000 261.000000 127.180889 35.718000 263.000000 
 127.181000 35.718000 261.000000 127.181000 35.718000 263.000000 
 127.180000 35.718000 270.000000 127.180000 35.718000 273.000000 
 127.180111 35.718000 269.000000 127.180111 35.718000 271.000000 
 127.180222 35.718000 268.000000 127.180222 35.718000 270.000000 
 127.180333 35.718000 266.000000 127.180333 35.718000 268.000000 
 127.180556 35.718000 264.000000 127.180556 35.718000 266.000000 
 127.180778 35.718000 262.000000 127.180778 35.718000 264.000000 
 127.180889 35.718000 261.000000 127.180889 35.718000 263.000000 
 127.181000 35.718000 261.000000 127.181000 35.718000 263.000000 
 127.181111 35.718000 260.000000 127.181111 35.718000 262.000000 
 127.180000 35.718111 271.000000 127.180000 35.718111 274.000000 
 127.180111 35.718111 270.000000 127.180111 35.718111 273.000000 
 127.180222 35.718111 268.000000 127.180222 35.718111 271.000000 
 127.180333 35.718111 267.000000 127.180333 35.718111 269.000000 
 127.180556 35.718111 265.000000 127.180556 35.718111 267.000000 
 127.180778 35.718111 263.000000 127.180778 35.718111 264.000000 
 127.180889 35.718111 263.000000 127.180889 35.718111 264.000000 
 127.181000 35.718111 262.000000 127.181000 35.718111 263.000000 
 127.181111 35.718111 262.000000 127.181111 35.718111 262.000000 
 127.180000 35.718222 273.000000 127.180000 35.718222 275.000000 
 127.180111 35.718222 271.000000 127.180111 35.718222 273.000000 
 127.180222 35.718222 269.000000 127.180222 35.718222 271.000000 
 127.180333 35.718222 268.000000 127.180333 35.718222 269.000000 
 127.180556 35.718222 265.000000 127.180556 35.718222 267.000000 
 127.180778 35.718222 264.000000 127.180778 35.718222 264.000000 
 127.180889 35.718222 263.000000 127.180889 35.718222 264.000000 
 127.181000 35.718222 262.000000 127.181000 35.718222 263.000000 
 127.181111 35.718222 262.000000 127.181111 35.718222 263.000000 
 127.180111 35.718222 271.000000 127.180111 35.718222 273.000000 
 127.180222 35.718222 269.000000 127.180222 35.718222 271.000000 
 127.180333 35.718222 268.000000 127.180333 35.718222 269.000000 
 127.180444 35.718222 267.000000 127.180444 35.718222 268.000000 
 127.180667 35.718222 264.000000 127.180667 35.718222 265.000000 
 127.180889 35.718222 263.000000 127.180889 35.718222 264.000000 
 127.181000 35.718222 262.000000 127.181000 35.718222 263.000000 
 127.181111 35.718222 262.000000 127.181111 35.718222 263.000000 
 127.181222 35.718222 262.000000 127.181222 35.718222 263.000000 
 127.180111 35.718333 271.000000 127.180111 35.718333 273.000000 
 127.180222 35.718333 269.000000 127.180222 35.718333 271.000000 
 127.180333 35.718333 268.000000 127.180333 35.718333 270.000000 
 127.180444 35.718333 267.000000 127.180444 35.718333 269.000000 
 127.180667 35.718333 264.000000 127.180667 35.718333 266.000000 
 127.180889 35.718333 263.000000 127.180889 35.718333 264.000000 
 127.181000 35.718333 263.000000 127.181000 35.718333 264.000000 
 127.181111 35.718333 263.000000 127.181111 35.718333 264.000000 
 127.181222 35.718333 263.000000 127.181222 35.718333 264.000000 
 127.180111 35.718444 271.000000 127.180111 35.718444 274.000000 
 127.180222 35.718444 270.000000 127.180222 35.718444 272.000000 
 127.180333 35.718444 269.000000 127.180333 35.718444 271.000000 
 127.180444 35.718444 267.000000 127.180444 35.718444 269.000000 
 127.180667 35.718444 265.000000 127.180667 35.718444 267.000000 
 127.180889 35.718444 264.000000 127.180889 35.718444 265.000000 
 127.181000 35.718444 264.000000 127.181000 35.718444 265.000000 
 127.181111 35.718444 264.000000 127.181111 35.718444 265.000000 
 127.181222 35.718444 264.000000 127.181222 35.718444 265.000000 
 127.180111 35.718556 272.000000 127.180111 35.718556 276.000000 
 127.180222 35.718556 271.000000 127.180222 35.718556 274.000000 
 127.180333 35.718556 269.000000 127.180333 35.718556 272.000000 
 127.180444 35.718556 268.000000 127.180444 35.718556 270.000000 
 127.180667 35.718556 265.000000 127.180667 35.718556 268.000000 
 127.180889 35.718556 265.000000 127.180889 35.718556 266.000000 
 127.181000 35.718556 265.000000 127.181000 35.718556 265.000000 
 127.181111 35.718556 265.000000 127.181111 35.718556 265.000000 
 127.181222 35.718556 265.000000 127.181222 35.718556 265.000000 
 127.180222 35.718556 271.000000 127.180222 35.718556 274.000000 
 127.180333 35.718556 269.000000 127.180333 35.718556 272.000000 
 127.180444 35.718556 268.000000 127.180444 35.718556 270.000000 
 127.180556 35.718556 267.000000 127.180556 35.718556 269.000000 
 127.180778 35.718556 265.000000 127.180778 35.718556 267.000000 
 127.181000 35.718556 265.000000 127.181000 35.718556 265.000000 
 127.181111 35.718556 265.000000 127.181111 35.718556 265.000000 
 127.181222 35.718556 265.000000 127.181222 35.718556 265.000000 
 127.181333 35.718556 265.000000 127.181333 35.718556 265.000000 
 127.180222 35.718667 272.000000 127.180222 35.718667 275.000000 
 127.180333 35.718667 270.000000 127.180333 35.718667 273.000000 
 127.180444 35.718667 269.000000 127.180444 35.718667 271.000000 
 127.180556 35.718667 268.000000 127.180556 35.718667 270.000000 
 127.180778 35.718667 266.000000 127.180778 35.718667 268.000000 
 127.181000 35.718667 265.000000 127.181000 35.718667 265.000000 
 127.181111 35.718667 265.000000 127.181111 35.718667 265.000000 
 127.181222 35.718667 265.000000 127.181222 35.718667 265.000000 
 127.181333 35.718667 265.000000 127.181333 35.718667 265.000000 
 127.180222 35.718778 273.000000 127.180222 35.718778 278.000000 
 127.180333 35.718778 271.000000 127.180333 35.718778 274.000000 
 127.180444 35.718778 270.000000 127.180444 35.718778 273.000000 
 127.180556 35.718778 268.000000 127.180556 35.718778 271.000000 
 127.180778 35.718778 267.000000 127.180778 35.718778 268.000000 
 127.181000 35.718778 265.000000 127.181000 35.718778 266.000000 
 127.181111 35.718778 265.000000 127.181111 35.718778 265.000000 
 127.181222 35.718778 265.000000 127.181222 35.718778 264.000000 
 127.181333 35.718778 265.000000 127.181333 35.718778 264.000000 
 127.180333 35.718778 271.000000 127.180333 35.718778 274.000000 
 127.180444 35.718778 270.000000 127.180444 35.718778 273.000000 
 127.180556 35.718778 268.000000 127.180556 35.718778 271.000000 
 127.180667 35.718778 268.000000 127.180667 35.718778 269.000000 
 127.180889 35.718778 265.000000 127.180889 35.718778 267.000000 
 127.181111 35.718778 265.000000 127.181111 35.718778 265.000000 
 127.181222 35.718778 265.000000 127.181222 35.718778 264.000000 
 127.181333 35.718778 265.000000 127.181333 35.718778 264.000000 
 127.181444 35.718778 266.000000 127.181444 35.718778 264.000000 
 127.180333 35.718889 273.000000 127.180333 35.718889 275.000000 
 127.180444 35.718889 271.000000 127.180444 35.718889 273.000000 
 127.180556 35.718889 269.000000 127.180556 35.718889 271.000000 
 127.180667 35.718889 268.000000 127.180667 35.718889 269.000000 
 127.180889 35.718889 266.000000 127.180889 35.718889 268.000000 
 127.181111 35.718889 264.000000 127.181111 35.718889 266.000000 
 127.181222 35.718889 264.000000 127.181222 35.718889 265.000000 
 127.181333 35.718889 264.000000 127.181333 35.718889 264.000000 
 127.181444 35.718889 265.000000 127.181444 35.718889 264.000000 
 127.180333 35.719000 273.000000 127.180333 35.719000 279.000000 
 127.180444 35.719000 271.000000 127.180444 35.719000 276.000000 
 127.180556 35.719000 269.000000 127.180556 35.719000 273.000000 
 127.180667 35.719000 269.000000 127.180667 35.719000 271.000000 
 127.180889 35.719000 267.000000 127.180889 35.719000 268.000000 
 127.181111 35.719000 265.000000 127.181111 35.719000 267.000000 
 127.181222 35.719000 264.000000 127.181222 35.719000 266.000000 
 127.181333 35.719000 264.000000 127.181333 35.719000 265.000000 
 127.181444 35.719000 265.000000 127.181444 35.719000 266.000000 
 127.180333 35.719111 276.000000 127.180333 35.719111 282.000000 
 127.180444 35.719111 273.000000 127.180444 35.719111 277.000000 
 127.180556 35.719111 271.000000 127.180556 35.719111 274.000000 
 127.180667 35.719111 269.000000 127.180667 35.719111 272.000000 
 127.180889 35.719111 267.000000 127.180889 35.719111 269.000000 
 127.181111 35.719111 266.000000 127.181111 35.719111 267.000000 
 127.181222 35.719111 265.000000 127.181222 35.719111 266.000000 
 127.181333 35.719111 266.000000 127.181333 35.719111 266.000000 
 127.181444 35.719111 267.000000 127.181444 35.719111 267.000000 
 127.180444 35.719111 273.000000 127.180444 35.719111 277.000000 
 127.180556 35.719111 271.000000 127.180556 35.719111 274.000000 
 127.180667 35.719111 269.000000 127.180667 35.719111 272.000000 
 127.180778 35.719111 268.000000 127.180778 35.719111 269.000000 
 127.181000 35.719111 267.000000 127.181000 35.719111 268.000000 
 127.181222 35.719111 265.000000 127.181222 35.719111 266.000000 
 127.181333 35.719111 266.000000 127.181333 35.719111 266.000000 
 127.181444 35.719111 267.000000 127.181444 35.719111 267.000000 
 127.181556 35.719111 269.000000 127.181556 35.719111 267.000000 
 127.180444 35.719222 274.000000 127.180444 35.719222 280.000000 
 127.180556 35.719222 272.000000 127.180556 35.719222 276.000000 
 127.180667 35.719222 269.000000 127.180667 35.719222 274.000000 
 127.180778 35.719222 269.000000 127.180778 35.719222 272.000000 
 127.181000 35.719222 267.000000 127.181000 35.719222 269.000000 
 127.181222 35.719222 266.000000 127.181222 35.719222 268.000000 
 127.181333 35.719222 267.000000 127.181333 35.719222 268.000000 
 127.181444 35.719222 267.000000 127.181444 35.719222 269.000000 
 127.181556 35.719222 269.000000 127.181556 35.719222 269.000000 
 127.180444 35.719333 276.000000 127.180444 35.719333 281.000000 
 127.180556 35.719333 274.000000 127.180556 35.719333 278.000000 
 127.180667 35.719333 272.000000 127.180667 35.719333 275.000000 
 127.180778 35.719333 271.000000 127.180778 35.719333 273.000000 
 127.181000 35.719333 268.000000 127.181000 35.719333 270.000000 
 127.181222 35.719333 268.000000 127.181222 35.719333 269.000000 
 127.181333 35.719333 269.000000 127.181333 35.719333 269.000000 
 127.181444 35.719333 269.000000 127.181444 35.719333 270.000000 
 127.181556 35.719333 269.000000 127.181556 35.719333 270.000000 
 127.180556 35.719444 275.000000 127.180556 35.719444 279.000000 
 127.180667 35.719444 273.000000 127.180667 35.719444 277.000000 
 127.180778 35.719444 272.000000 127.180778 35.719444 274.000000 
 127.180889 35.719444 270.000000 127.180889 35.719444 273.000000 
 127.181111 35.719444 269.000000 127.181111 35.719444 270.000000 
 127.181333 35.719444 270.000000 127.181333 35.719444 270.000000 
 127.181444 35.719444 270.000000 127.181444 35.719444 270.000000 
 127.181556 35.719444 270.000000 127.181556 35.719444 270.000000 
 127.181667 35.719444 272.000000 127.181667 35.719444 270.000000 
 127.180556 35.719556 277.000000 127.180556 35.719556 280.000000 
 127.180667 35.719556 274.000000 127.180667 35.719556 277.000000 
 127.180778 35.719556 273.000000 127.180778 35.719556 275.000000 
 127.180889 35.719556 271.000000 127.180889 35.719556 274.000000 
 127.181111 35.719556 270.000000 127.181111 35.719556 271.000000 
 127.181333 35.719556 270.000000 127.181333 35.719556 270.000000 
 127.181444 35.719556 270.000000 127.181444 35.719556 270.000000 
 127.181556 35.719556 270.000000 127.181556 35.719556 270.000000 
 127.181667 35.719556 271.000000 127.181667 35.719556 270.000000 
 127.180556 35.719667 277.000000 127.180556 35.719667 281.000000 
 127.180667 35.719667 275.000000 127.180667 35.719667 278.000000 
 127.180778 35.719667 274.000000 127.180778 35.719667 276.000000 
 127.180889 35.719667 272.000000 127.180889 35.719667 274.000000 
 127.181111 35.719667 270.000000 127.181111 35.719667 272.000000 
 127.181333 35.719667 270.000000 127.181333 35.719667 270.000000 
 127.181444 35.719667 270.000000 127.181444 35.719667 270.000000 
 127.181556 35.719667 270.000000 127.181556 35.719667 270.000000 
 127.181667 35.719667 271.000000 127.181667 35.719667 270.000000 
 127.180667 35.719667 275.000000 127.180667 35.719667 278.000000 
 127.180778 35.719667 274.000000 127.180778 35.719667 276.000000 
 127.180889 35.719667 272.000000 127.180889 35.719667 274.000000 
 127.181000 35.719667 271.000000 127.181000 35.719667 273.000000 
 127.181222 35.719667 270.000000 127.181222 35.719667 271.000000 
 127.181444 35.719667 270.000000 127.181444 35.719667 270.000000 
 127.181556 35.719667 270.000000 127.181556 35.719667 270.000000 
 127.181667 35.719667 271.000000 127.181667 35.719667 270.000000 
 127.181778 35.719667 275.000000 127.181778 35.719667 270.000000 
 127.180667 35.719778 276.000000 127.180667 35.719778 279.000000 
 127.180778 35.719778 274.000000 127.180778 35.719778 277.000000 
 127.180889 35.719778 273.000000 127.180889 35.719778 275.000000 
 127.181000 35.719778 272.000000 127.181000 35.719778 274.000000 
 127.181222 35.719778 270.000000 127.181222 35.719778 272.000000 
 127.181444 35.719778 270.000000 127.181444 35.719778 271.000000 
 127.181556 35.719778 270.000000 127.181556 35.719778 270.000000 
 127.181667 35.719778 270.000000 127.181667 35.719778 270.000000 
 127.181778 35.719778 274.000000 127.181778 35.719778 270.000000 
 127.180667 35.719889 277.000000 127.180667 35.719889 281.000000 
 127.180778 35.719889 275.000000 127.180778 35.719889 278.000000 
 127.180889 35.719889 274.000000 127.180889 35.719889 276.000000 
 127.181000 35.719889 273.000000 127.181000 35.719889 275.000000 
 127.181222 35.719889 272.000000 127.181222 35.719889 273.000000 
 127.181444 35.719889 270.000000 127.181444 35.719889 272.000000 
 127.181556 35.719889 270.000000 127.181556 35.719889 271.000000 
 127.181667 35.719889 270.000000 127.181667 35.719889 270.000000 
 127.181778 35.719889 273.000000 127.181778 35.719889 270.000000 
 127.180778 35.720000 276.000000 127.180778 35.720000 279.000000 
 127.180889 35.720000 275.000000 127.180889 35.720000 278.000000 
 127.181000 35.720000 274.000000 127.181000 35.720000 276.000000 
 127.181111 35.720000 273.000000 127.181111 35.720000 275.000000 
 127.181333 35.720000 272.000000 127.181333 35.720000 274.000000 
 127.181556 35.720000 270.000000 127.181556 35.720000 271.000000 
 127.181667 35.720000 270.000000 127.181667 35.720000 270.000000 
 127.181778 35.720000 272.000000 127.181778 35.720000 270.000000 
 127.181889 35.720000 280.000000 127.181889 35.720000 273.000000 
 127.180778 35.720111 278.000000 127.180778 35.720111 280.000000 
 127.180889 35.720111 276.000000 127.180889 35.720111 279.000000 
 127.181000 35.720111 275.000000 127.181000 35.720111 277.000000 
 127.181111 35.720111 275.000000 127.181111 35.720111 277.000000 
 127.181333 35.720111 273.000000 127.181333 35.720111 274.000000 
 127.181556 35.720111 270.000000 127.181556 35.720111 271.000000 
 127.181667 35.720111 270.000000 127.181667 35.720111 271.000000 
 127.181778 35.720111 273.000000 127.181778 35.720111 272.000000 
 127.181889 35.720111 279.000000 127.181889 35.720111 274.000000 
 127.180778 35.720222 279.000000 127.180778 35.720222 282.000000 
 127.180889 35.720222 277.000000 127.180889 35.720222 280.000000 
 127.181000 35.720222 277.000000 127.181000 35.720222 279.000000 
 127.181111 35.720222 276.000000 127.181111 35.720222 278.000000 
 127.181333 35.720222 273.000000 127.181333 35.720222 275.000000 
 127.181556 35.720222 271.000000 127.181556 35.720222 274.000000 
 127.181667 35.720222 272.000000 127.181667 35.720222 273.000000 
 127.181778 35.720222 274.000000 127.181778 35.720222 274.000000 
 127.181889 35.720222 278.000000 127.181889 35.720222 276.000000 
 127.180889 35.720222 277.000000 127.180889 35.720222 280.000000 
 127.181000 35.720222 277.000000 127.181000 35.720222 279.000000 
 127.181111 35.720222 276.000000 127.181111 35.720222 278.000000 
 127.181222 35.720222 274.000000 127.181222 35.720222 276.000000 
 127.181444 35.720222 271.000000 127.181444 35.720222 275.000000 
 127.181667 35.720222 272.000000 127.181667 35.720222 273.000000 
 127.181778 35.720222 274.000000 127.181778 35.720222 274.000000 
 127.181889 35.720222 278.000000 127.181889 35.720222 276.000000 
 127.182000 35.720222 285.000000 127.182000 35.720222 278.000000 
 127.180889 35.720333 279.000000 127.180889 35.720333 281.000000 
 127.181000 35.720333 278.000000 127.181000 35.720333 280.000000 
 127.181111 35.720333 276.000000 127.181111 35.720333 278.000000 
 127.181222 35.720333 275.000000 127.181222 35.720333 276.000000 
 127.181444 35.720333 274.000000 127.181444 35.720333 274.000000 
 127.181667 35.720333 274.000000 127.181667 35.720333 275.000000 
 127.181778 35.720333 276.000000 127.181778 35.720333 275.000000 
 127.181889 35.720333 278.000000 127.181889 35.720333 276.000000 
 127.182000 35.720333 283.000000 127.182000 35.720333 279.000000 
 127.180889 35.720444 280.000000 127.180889 35.720444 282.000000 
 127.181000 35.720444 278.000000 127.181000 35.720444 280.000000 
 127.181111 35.720444 276.000000 127.181111 35.720444 279.000000 
 127.181222 35.720444 275.000000 127.181222 35.720444 277.000000 
 127.181444 35.720444 274.000000 127.181444 35.720444 275.000000 
 127.181667 35.720444 275.000000 127.181667 35.720444 275.000000 
 127.181778 35.720444 276.000000 127.181778 35.720444 276.000000 
 127.181889 35.720444 279.000000 127.181889 35.720444 276.000000 
 127.182000 35.720444 282.000000 127.182000 35.720444 279.000000 
 127.180889 35.720556 280.000000 127.180889 35.720556 283.000000 
 127.181000 35.720556 279.000000 127.181000 35.720556 280.000000 
 127.181111 35.720556 277.000000 127.181111 35.720556 279.000000 
 127.181222 35.720556 275.000000 127.181222 35.720556 278.000000 
 127.181444 35.720556 275.000000 127.181444 35.720556 275.000000 
 127.181667 35.720556 276.000000 127.181667 35.720556 275.000000 
 127.181778 35.720556 276.000000 127.181778 35.720556 275.000000 
 127.181889 35.720556 279.000000 127.181889 35.720556 277.000000 
 127.182000 35.720556 282.000000 127.182000 35.720556 279.000000 
 127.181000 35.720556 279.000000 127.181000 35.720556 280.000000 
 127.181111 35.720556 277.000000 127.181111 35.720556 279.000000 
 127.181222 35.720556 275.000000 127.181222 35.720556 278.000000 
 127.181333 35.720556 275.000000 127.181333 35.720556 277.000000 
 127.181556 35.720556 275.000000 127.181556 35.720556 275.000000 
 127.181778 35.720556 276.000000 127.181778 35.720556 275.000000 
 127.181889 35.720556 279.000000 127.181889 35.720556 277.000000 
 127.182000 35.720556 282.000000 127.182000 35.720556 279.000000 
 127.182111 35.720556 285.000000 127.182111 35.720556 282.000000 
 127.181000 35.720667 279.000000 127.181000 35.720667 284.000000 
 127.181111 35.720667 278.000000 127.181111 35.720667 282.000000 
 127.181222 35.720667 277.000000 127.181222 35.720667 280.000000 
 127.181333 35.720667 275.000000 127.181333 35.720667 279.000000 
 127.181556 35.720667 275.000000 127.181556 35.720667 276.000000 
 127.181778 35.720667 277.000000 127.181778 35.720667 275.000000 
 127.181889 35.720667 279.000000 127.181889 35.720667 276.000000 
 127.182000 35.720667 282.000000 127.182000 35.720667 279.000000 
 127.182111 35.720667 284.000000 127.182111 35.720667 282.000000 
 127.181000 35.720778 282.000000 127.181000 35.720778 288.000000 
 127.181111 35.720778 280.000000 127.181111 35.720778 283.000000 
 127.181222 35.720778 279.000000 127.181222 35.720778 281.000000 
 127.181333 35.720778 277.000000 127.181333 35.720778 280.000000 
 127.181556 35.720778 275.000000 127.181556 35.720778 278.000000 
 127.181778 35.720778 276.000000 127.181778 35.720778 276.000000 
 127.181889 35.720778 279.000000 127.181889 35.720778 275.000000 
 127.182000 35.720778 282.000000 127.182000 35.720778 277.000000 
 127.182111 35.720778 284.000000 127.182111 35.720778 281.000000 
 127.181111 35.720778 280.000000 127.181111 35.720778 283.000000 
 127.181222 35.720778 279.000000 127.181222 35.720778 281.000000 
 127.181333 35.720778 277.000000 127.181333 35.720778 280.000000 
 127.181444 35.720778 276.000000 127.181444 35.720778 279.000000 
 127.181667 35.720778 275.000000 127.181667 35.720778 276.000000 
 127.181889 35.720778 279.000000 127.181889 35.720778 275.000000 
 127.182000 35.720778 282.000000 127.182000 35.720778 277.000000 
 127.182111 35.720778 284.000000 127.182111 35.720778 281.000000 
 127.182222 35.720778 286.000000 127.182222 35.720778 283.000000 
 127.181111 35.720889 281.000000 127.181111 35.720889 287.000000 
 127.181222 35.720889 280.000000 127.181222 35.720889 284.000000 
 127.181333 35.720889 279.000000 127.181333 35.720889 283.000000 
 127.181444 35.720889 278.000000 127.181444 35.720889 281.000000 
 127.181667 35.720889 276.000000 127.181667 35.720889 278.000000 
 127.181889 35.720889 277.000000 127.181889 35.720889 277.000000 
 127.182000 35.720889 281.000000 127.182000 35.720889 277.000000 
 127.182111 35.720889 283.000000 127.182111 35.720889 279.000000 
 127.182222 35.720889 285.000000 127.182222 35.720889 280.000000 
 127.181111 35.721000 284.000000 127.181111 35.721000 289.000000 
 127.181222 35.721000 283.000000 127.181222 35.721000 286.000000 
 127.181333 35.721000 281.000000 127.181333 35.721000 284.000000 
 127.181444 35.721000 280.000000 127.181444 35.721000 282.000000 
 127.181667 35.721000 277.000000 127.181667 35.721000 280.000000 
 127.181889 35.721000 277.000000 127.181889 35.721000 279.000000 
 127.182000 35.721000 279.000000 127.182000 35.721000 279.000000 
 127.182111 35.721000 280.000000 127.182111 35.721000 279.000000 
 127.182222 35.721000 283.000000 127.182222 35.721000 283.000000 
 127.181222 35.721000 283.000000 127.181222 35.721000 286.000000 
 127.181333 35.721000 281.000000 127.181333 35.721000 284.000000 
 127.181444 35.721000 280.000000 127.181444 35.721000 282.000000 
 127.181556 35.721000 278.000000 127.181556 35.721000 281.000000 
 127.181778 35.721000 277.000000 127.181778 35.721000 278.000000 
 127.182000 35.721000 279.000000 127.182000 35.721000 279.000000 
 127.182111 35.721000 280.000000 127.182111 35.721000 279.000000 
 127.182222 35.721000 283.000000 127.182222 35.721000 283.000000 
 127.182333 35.721000 285.000000 127.182333 35.721000 285.000000 
 127.181222 35.721111 284.000000 127.181222 35.721111 288.000000 
 127.181333 35.721111 282.000000 127.181333 35.721111 286.000000 
 127.181444 35.721111 281.000000 127.181444 35.721111 284.000000 
 127.181556 35.721111 280.000000 127.181556 35.721111 282.000000 
 127.181778 35.721111 279.000000 127.181778 35.721111 280.000000 
 127.182000 35.721111 279.000000 127.182000 35.721111 280.000000 
 127.182111 35.721111 283.000000 127.182111 35.721111 281.000000 
 127.182222 35.721111 285.000000 127.182222 35.721111 285.000000 
 127.182333 35.721111 286.000000 127.182333 35.721111 288.000000 
 127.181222 35.721222 286.000000 127.181222 35.721222 289.000000 
 127.181333 35.721222 284.000000 127.181333 35.721222 287.000000 
 127.181444 35.721222 282.000000 127.181444 35.721222 284.000000 
 127.181556 35.721222 281.000000 127.181556 35.721222 283.000000 
 127.181778 35.721222 280.000000 127.181778 35.721222 280.000000 
 127.182000 35.721222 281.000000 127.182000 35.721222 280.000000 
 127.182111 35.721222 285.000000 127.182111 35.721222 283.000000 
 127.182222 35.721222 288.000000 127.182222 35.721222 286.000000 
 127.182333 35.721222 290.000000 127.182333 35.721222 288.000000 
 127.181222 35.721333 287.000000 127.181222 35.721333 290.000000 
 127.181333 35.721333 284.000000 127.181333 35.721333 287.000000 
 127.181444 35.721333 283.000000 127.181444 35.721333 285.000000 
 127.181556 35.721333 282.000000 127.181556 35.721333 284.000000 
 127.181778 35.721333 280.000000 127.181778 35.721333 281.000000 
 127.182000 35.721333 283.000000 127.182000 35.721333 280.000000 
 127.182111 35.721333 286.000000 127.182111 35.721333 283.000000 
 127.182222 35.721333 288.000000 127.182222 35.721333 286.000000 
 127.182333 35.721333 291.000000 127.182333 35.721333 289.000000 
 127.181333 35.721333 284.000000 127.181333 35.721333 287.000000 
 127.181444 35.721333 283.000000 127.181444 35.721333 285.000000 
 127.181556 35.721333 282.000000 127.181556 35.721333 284.000000 
 127.181667 35.721333 280.000000 127.181667 35.721333 283.000000 
 127.181889 35.721333 280.000000 127.181889 35.721333 280.000000 
 127.182111 35.721333 286.000000 127.182111 35.721333 283.000000 
 127.182222 35.721333 288.000000 127.182222 35.721333 286.000000 
 127.182333 35.721333 291.000000 127.182333 35.721333 289.000000 
 127.182444 35.721333 294.000000 127.182444 35.721333 291.000000 
 127.181333 35.721444 285.000000 127.181333 35.721444 290.000000 
 127.181444 35.721444 284.000000 127.181444 35.721444 288.000000 
 127.181556 35.721444 283.000000 127.181556 35.721444 286.000000 
 127.181667 35.721444 281.000000 127.181667 35.721444 284.000000 
 127.181889 35.721444 280.000000 127.181889 35.721444 281.000000 
 127.182111 35.721444 286.000000 127.182111 35.721444 282.000000 
 127.182222 35.721444 289.000000 127.182222 35.721444 286.000000 
 127.182333 35.721444 291.000000 127.182333 35.721444 288.000000 
 127.182444 35.721444 294.000000 127.182444 35.721444 291.000000 
 127.181333 35.721556 288.000000 127.181333 35.721556 292.000000 
 127.181444 35.721556 286.000000 127.181444 35.721556 289.000000 
 127.181556 35.721556 284.000000 127.181556 35.721556 287.000000 
 127.181667 35.721556 282.000000 127.181667 35.721556 284.000000 
 127.181889 35.721556 280.000000 127.181889 35.721556 281.000000 
 127.182111 35.721556 286.000000 127.182111 35.721556 282.000000 
 127.182222 35.721556 288.000000 127.182222 35.721556 285.000000 
 127.182333 35.721556 291.000000 127.182333 35.721556 287.000000 
 127.182444 35.721556 294.000000 127.182444 35.721556 290.000000 
 127.181444 35.721556 286.000000 127.181444 35.721556 289.000000 
 127.181556 35.721556 284.000000 127.181556 35.721556 287.000000 
 127.181667 35.721556 282.000000 127.181667 35.721556 284.000000 
 127.181778 35.721556 281.000000 127.181778 35.721556 283.000000 
 127.182000 35.721556 282.000000 127.182000 35.721556 280.000000 
 127.182222 35.721556 288.000000 127.182222 35.721556 285.000000 
 127.182333 35.721556 291.000000 127.182333 35.721556 287.000000 
 127.182444 35.721556 294.000000 127.182444 35.721556 290.000000 
 127.182556 35.721556 298.000000 127.182556 35.721556 294.000000 
 127.181444 35.721667 287.000000 127.181444 35.721667 291.000000 
 127.181556 35.721667 284.000000 127.181556 35.721667 288.000000 
 127.181667 35.721667 283.000000 127.181667 35.721667 286.000000 
 127.181778 35.721667 281.000000 127.181778 35.721667 284.000000 
 127.182000 35.721667 282.000000 127.182000 35.721667 283.000000 
 127.182222 35.721667 287.000000 127.182222 35.721667 285.000000 
 127.182333 35.721667 290.000000 127.182333 35.721667 286.000000 
 127.182444 35.721667 294.000000 127.182444 35.721667 289.000000 
 127.182556 35.721667 298.000000 127.182556 35.721667 293.000000 
 127.181444 35.721778 288.000000 127.181444 35.721778 292.000000 
 127.181556 35.721778 286.000000 127.181556 35.721778 289.000000 
 127.181667 35.721778 284.000000 127.181667 35.721778 287.000000 
 127.181778 35.721778 283.000000 127.181778 35.721778 285.000000 
 127.182000 35.721778 284.000000 127.182000 35.721778 284.000000 
 127.182222 35.721778 286.000000 127.182222 35.721778 285.000000 
 127.182333 35.721778 289.000000 127.182333 35.721778 285.000000 
 127.182444 35.721778 293.000000 127.182444 35.721778 287.000000 
 127.182556 35.721778 298.000000 127.182556 35.721778 291.000000 
 127.181444 35.721889 289.000000 127.181444 35.721889 295.000000 
 127.181556 35.721889 287.000000 127.181556 35.721889 291.000000 
 127.181667 35.721889 285.000000 127.181667 35.721889 288.000000 
 127.181778 35.721889 285.000000 127.181778 35.721889 285.000000 
 127.182000 35.721889 285.000000 127.182000 35.721889 285.000000 
 127.182222 35.721889 285.000000 127.182222 35.721889 288.000000 
 127.182333 35.721889 287.000000 127.182333 35.721889 286.000000 
 127.182444 35.721889 291.000000 127.182444 35.721889 286.000000 
 127.182556 35.721889 297.000000 127.182556 35.721889 287.000000 
 127.181556 35.721889 287.000000 127.181556 35.721889 291.000000 
 127.181667 35.721889 285.000000 127.181667 35.721889 288.000000 
 127.181778 35.721889 285.000000 127.181778 35.721889 285.000000 
 127.181889 35.721889 284.000000 127.181889 35.721889 285.000000 
 127.182111 35.721889 285.000000 127.182111 35.721889 286.000000 
 127.182333 35.721889 287.000000 127.182333 35.721889 286.000000 
 127.182444 35.721889 291.000000 127.182444 35.721889 286.000000 
 127.182556 35.721889 297.000000 127.182556 35.721889 287.000000 
 127.182667 35.721889 302.000000 127.182667 35.721889 293.000000 
 127.181556 35.722000 288.000000 127.181556 35.722000 293.000000 
 127.181667 35.722000 285.000000 127.181667 35.722000 291.000000 
 127.181778 35.722000 285.000000 127.181778 35.722000 288.000000 
 127.181889 35.722000 285.000000 127.181889 35.722000 287.000000 
 127.182111 35.722000 288.000000 127.182111 35.722000 286.000000 
 127.182333 35.722000 286.000000 127.182333 35.722000 290.000000 
 127.182444 35.722000 287.000000 127.182444 35.722000 290.000000 
 127.182556 35.722000 293.000000 127.182556 35.722000 290.000000 
 127.182667 35.722000 300.000000 127.182667 35.722000 290.000000 
 127.181556 35.722111 291.000000 127.181556 35.722111 294.000000 
 127.181667 35.722111 288.000000 127.181667 35.722111 293.000000 
 127.181778 35.722111 287.000000 127.181778 35.722111 291.000000 
 127.181889 35.722111 286.000000 127.181889 35.722111 289.000000 
 127.182111 35.722111 290.000000 127.182111 35.722111 290.000000 
 127.182333 35.722111 290.000000 127.182333 35.722111 291.000000 
 127.182444 35.722111 290.000000 127.182444 35.722111 292.000000 
 127.182556 35.722111 290.000000 127.182556 35.722111 291.000000 
 127.182667 35.722111 297.000000 127.182667 35.722111 290.000000 
 127.181667 35.722111 288.000000 127.181667 35.722111 293.000000 
 127.181778 35.722111 287.000000 127.181778 35.722111 291.000000 
 127.181889 35.722111 286.000000 127.181889 35.722111 289.000000 
 127.182000 35.722111 286.000000 127.182000 35.722111 289.000000 
 127.182222 35.722111 290.000000 127.182222 35.722111 290.000000 
 127.182444 35.722111 290.000000 127.182444 35.722111 292.000000 
 127.182556 35.722111 290.000000 127.182556 35.722111 291.000000 
 127.182667 35.722111 297.000000 127.182667 35.722111 290.000000 
 127.182778 35.722111 302.000000 127.182778 35.722111 291.000000 
 127.181667 35.722222 291.000000 127.181667 35.722222 294.000000 
 127.181778 35.722222 289.000000 127.181778 35.722222 292.000000 
 127.181889 35.722222 289.000000 127.181889 35.722222 290.000000 
 127.182000 35.722222 290.000000 127.182000 35.722222 290.000000 
 127.182222 35.722222 291.000000 127.182222 35.722222 290.000000 
 127.182444 35.722222 291.000000 127.182444 35.722222 293.000000 
 127.182556 35.722222 290.000000 127.182556 35.722222 293.000000 
 127.182667 35.722222 291.000000 127.182667 35.722222 292.000000 
 127.182778 35.722222 298.000000 127.182778 35.722222 290.000000 
 127.181667 35.722333 292.000000 127.181667 35.722333 297.000000 
 127.181778 35.722333 290.000000 127.181778 35.722333 294.000000 
 127.181889 35.722333 290.000000 127.181889 35.722333 292.000000 
 127.182000 35.722333 290.000000 127.182000 35.722333 291.000000 
 127.182222 35.722333 292.000000 127.182222 35.722333 290.000000 
 127.182444 35.722333 293.000000 127.182444 35.722333 295.000000 
 127.182556 35.722333 292.000000 127.182556 35.722333 297.000000 
 127.182667 35.722333 290.000000 127.182667 35.722333 297.000000 
 127.182778 35.722333 294.000000 127.182778 35.722333 296.000000 
 127.181667 35.722444 294.000000 127.181667 35.722444 299.000000 
 127.181778 35.722444 292.000000 127.181778 35.722444 297.000000 
 127.181889 35.722444 291.000000 127.181889 35.722444 295.000000 
 127.182000 35.722444 290.000000 127.182000 35.722444 294.000000 
 127.182222 35.722444 291.000000 127.182222 35.722444 292.000000 
 127.182444 35.722444 297.000000 127.182444 35.722444 296.000000 
 127.182556 35.722444 297.000000 127.182556 35.722444 298.000000 
 127.182667 35.722444 296.000000 127.182667 35.722444 300.000000 
 127.182778 35.722444 294.000000 127.182778 35.722444 300.000000 
 127.181778 35.722444 292.000000 127.181778 35.722444 297.000000 
 127.181889 35.722444 291.000000 127.181889 35.722444 295.000000 
 127.182000 35.722444 290.000000 127.182000 35.722444 294.000000 
 127.182111 35.722444 290.000000 127.182111 35.722444 293.000000 
 127.182333 35.722444 295.000000 127.182333 35.722444 291.000000 
 127.182556 35.722444 297.000000 127.182556 35.722444 298.000000 
 127.182667 35.722444 296.000000 127.182667 35.722444 300.000000 
 127.182778 35.722444 294.000000 127.182778 35.722444 300.000000 
 127.182889 35.722444 297.000000 127.182889 35.722444 298.000000 
 127.181778 35.722556 295.000000 127.181778 35.722556 301.000000 
 127.181889 35.722556 294.000000 127.181889 35.722556 298.000000 
 127.182000 35.722556 293.000000 127.182000 35.722556 297.000000 
 127.182111 35.722556 292.000000 127.182111 35.722556 297.000000 
 127.182333 35.722556 296.000000 127.182333 35.722556 295.000000 
 127.182556 35.722556 300.000000 127.182556 35.722556 299.000000 
 127.182667 35.722556 300.000000 127.182667 35.722556 302.000000 
 127.182778 35.722556 298.000000 127.182778 35.722556 304.000000 
 127.182889 35.722556 295.000000 127.182889 35.722556 304.000000 
 127.181778 35.722667 298.000000 127.181778 35.722667 303.000000 
 127.181889 35.722667 297.000000 127.181889 35.722667 300.000000 
 127.182000 35.722667 297.000000 127.182000 35.722667 299.000000 
 127.182111 35.722667 296.000000 127.182111 35.722667 299.000000 
 127.182333 35.722667 295.000000 127.182333 35.722667 297.000000 
 127.182556 35.722667 302.000000 127.182556 35.722667 297.000000 
 127.182667 35.722667 304.000000 127.182667 35.722667 304.000000 
 127.182778 35.722667 304.000000 127.182778 35.722667 306.000000 
 127.182889 35.722667 302.000000 127.182889 35.722667 306.000000 
 127.181889 35.722667 297.000000 127.181889 35.722667 300.000000 
 127.182000 35.722667 297.000000 127.182000 35.722667 299.000000 
 127.182111 35.722667 296.000000 127.182111 35.722667 299.000000 
 127.182222 35.722667 295.000000 127.182222 35.722667 298.000000 
 127.182444 35.722667 299.000000 127.182444 35.722667 295.000000 
 127.182667 35.722667 304.000000 127.182667 35.722667 304.000000 
 127.182778 35.722667 304.000000 127.182778 35.722667 306.000000 
 127.182889 35.722667 302.000000 127.182889 35.722667 306.000000 
 127.183000 35.722667 300.000000 127.183000 35.722667 305.000000 
 127.181889 35.722778 299.000000 127.181889 35.722778 303.000000 
 127.182000 35.722778 299.000000 127.182000 35.722778 302.000000 
 127.182111 35.722778 298.000000 127.182111 35.722778 301.000000 
 127.182222 35.722778 297.000000 127.182222 35.722778 301.000000 
 127.182444 35.722778 297.000000 127.182444 35.722778 297.000000 
 127.182667 35.722778 306.000000 127.182667 35.722778 304.000000 
 127.182778 35.722778 306.000000 127.182778 35.722778 307.000000 
 127.182889 35.722778 305.000000 127.182889 35.722778 310.000000 
 127.183000 35.722778 304.000000 127.183000 35.722778 310.000000 
 127.181889 35.722889 302.000000 127.181889 35.722889 304.000000 
 127.182000 35.722889 301.000000 127.182000 35.722889 303.000000 
 127.182111 35.722889 301.000000 127.182111 35.722889 303.000000 
 127.182222 35.722889 300.000000 127.182222 35.722889 302.000000 
 127.182444 35.722889 298.000000 127.182444 35.722889 300.000000 
 127.182667 35.722889 307.000000 127.182667 35.722889 303.000000 
 127.182778 35.722889 310.000000 127.182778 35.722889 308.000000 
 127.182889 35.722889 310.000000 127.182889 35.722889 312.000000 
 127.183000 35.722889 309.000000 127.183000 35.722889 314.000000 
 127.181889 35.723000 303.000000 127.181889 35.723000 306.000000 
 127.182000 35.723000 303.000000 127.182000 35.723000 304.000000 
 127.182111 35.723000 302.000000 127.182111 35.723000 304.000000 
 127.182222 35.723000 301.000000 127.182222 35.723000 304.000000 
 127.182444 35.723000 300.000000 127.182444 35.723000 300.000000 
 127.182667 35.723000 308.000000 127.182667 35.723000 302.000000 
 127.182778 35.723000 312.000000 127.182778 35.723000 311.000000 
 127.182889 35.723000 314.000000 127.182889 35.723000 315.000000 
 127.183000 35.723000 313.000000 127.183000 35.723000 319.000000 
 127.182000 35.723000 303.000000 127.182000 35.723000 304.000000 
 127.182111 35.723000 302.000000 127.182111 35.723000 304.000000 
 127.182222 35.723000 301.000000 127.182222 35.723000 304.000000 
 127.182333 35.723000 300.000000 127.182333 35.723000 302.000000 
 127.182556 35.723000 303.000000 127.182556 35.723000 300.000000 
 127.182778 35.723000 312.000000 127.182778 35.723000 311.000000 
 127.182889 35.723000 314.000000 127.182889 35.723000 315.000000 
 127.183000 35.723000 313.000000 127.183000 35.723000 319.000000 
 127.183111 35.723000 311.000000 127.183111 35.723000 322.000000 
 127.182000 35.723111 304.000000 127.182000 35.723111 307.000000 
 127.182111 35.723111 304.000000 127.182111 35.723111 306.000000 
 127.182222 35.723111 302.000000 127.182222 35.723111 305.000000 
 127.182333 35.723111 300.000000 127.182333 35.723111 303.000000 
 127.182556 35.723111 302.000000 127.182556 35.723111 300.000000 
 127.182778 35.723111 315.000000 127.182778 35.723111 312.000000 
 127.182889 35.723111 319.000000 127.182889 35.723111 317.000000 
 127.183000 35.723111 322.000000 127.183000 35.723111 323.000000 
 127.183111 35.723111 323.000000 127.183111 35.723111 327.000000 
 127.182000 35.723222 306.000000 127.182000 35.723222 308.000000 
 127.182111 35.723222 305.000000 127.182111 35.723222 307.000000 
 127.182222 35.723222 303.000000 127.182222 35.723222 306.000000 
 127.182333 35.723222 301.000000 127.182333 35.723222 303.000000 
 127.182556 35.723222 304.000000 127.182556 35.723222 302.000000 
 127.182778 35.723222 317.000000 127.182778 35.723222 313.000000 
 127.182889 35.723222 323.000000 127.182889 35.723222 318.000000 
 127.183000 35.723222 327.000000 127.183000 35.723222 325.000000 
 127.183111 35.723222 328.000000 127.183111 35.723222 329.000000 
 127.182111 35.723222 305.000000 127.182111 35.723222 307.000000 
 127.182222 35.723222 303.000000 127.182222 35.723222 306.000000 
 127.182333 35.723222 301.000000 127.182333 35.723222 303.000000 
 127.182444 35.723222 300.000000 127.182444 35.723222 301.000000 
 127.182667 35.723222 312.000000 127.182667 35.723222 309.000000 
 127.182889 35.723222 323.000000 127.182889 35.723222 318.000000 
 127.183000 35.723222 327.000000 127.183000 35.723222 325.000000 
 127.183111 35.723222 328.000000 127.183111 35.723222 329.000000 
 127.183222 35.723222 327.000000 127.183222 35.723222 332.000000 
 127.182111 35.723333 306.000000 127.182111 35.723333 308.000000 
 127.182222 35.723333 303.000000 127.182222 35.723333 305.000000 
 127.182333 35.723333 301.000000 127.182333 35.723333 305.000000 
 127.182444 35.723333 302.000000 127.182444 35.723333 305.000000 
 127.182667 35.723333 313.000000 127.182667 35.723333 311.000000 
 127.182889 35.723333 325.000000 127.182889 35.723333 321.000000 
 127.183000 35.723333 329.000000 127.183000 35.723333 327.000000 
 127.183111 35.723333 332.000000 127.183111 35.723333 331.000000 
 127.183222 35.723333 333.000000 127.183222 35.723333 335.000000 
 127.182111 35.723444 305.000000 127.182111 35.723444 308.000000 
 127.182222 35.723444 305.000000 127.182222 35.723444 305.000000 
 127.182333 35.723444 305.000000 127.182333 35.723444 305.000000 
 127.182444 35.723444 307.000000 127.182444 35.723444 306.000000 
 127.182667 35.723444 314.000000 127.182667 35.723444 311.000000 
 127.182889 35.723444 327.000000 127.182889 35.723444 322.000000 
 127.183000 35.723444 331.000000 127.183000 35.723444 327.000000 
 127.183111 35.723444 335.000000 127.183111 35.723444 332.000000 
 127.183222 35.723444 339.000000 127.183222 35.723444 336.000000 
 127.182222 35.723444 305.000000 127.182222 35.723444 305.000000 
 127.182333 35.723444 305.000000 127.182333 35.723444 305.000000 
 127.182444 35.723444 307.000000 127.182444 35.723444 306.000000 
 127.182556 35.723444 311.000000 127.182556 35.723444 308.000000 
 127.182778 35.723444 321.000000 127.182778 35.723444 316.000000 
 127.183000 35.723444 331.000000 127.183000 35.723444 327.000000 
 127.183111 35.723444 335.000000 127.183111 35.723444 332.000000 
 127.183222 35.723444 339.000000 127.183222 35.723444 336.000000 
 127.183333 35.723444 340.000000 127.183333 35.723444 341.000000 
 127.182222 35.723556 305.000000 127.182222 35.723556 306.000000 
 127.182333 35.723556 306.000000 127.182333 35.723556 307.000000 
 127.182444 35.723556 308.000000 127.182444 35.723556 308.000000 
 127.182556 35.723556 311.000000 127.182556 35.723556 310.000000 
 127.182778 35.723556 322.000000 127.182778 35.723556 319.000000 
 127.183000 35.723556 332.000000 127.183000 35.723556 328.000000 
 127.183111 35.723556 336.000000 127.183111 35.723556 332.000000 
 127.183222 35.723556 341.000000 127.183222 35.723556 337.000000 
 127.183333 35.723556 344.000000 127.183333 35.723556 342.000000 
 127.182222 35.723667 307.000000 127.182222 35.723667 309.000000 
 127.182333 35.723667 308.000000 127.182333 35.723667 309.000000 
 127.182444 35.723667 310.000000 127.182444 35.723667 309.000000 
 127.182556 35.723667 314.000000 127.182556 35.723667 312.000000 
 127.182778 35.723667 323.000000 127.182778 35.723667 320.000000 
 127.183000 35.723667 332.000000 127.183000 35.723667 328.000000 
 127.183111 35.723667 337.000000 127.183111 35.723667 333.000000 
 127.183222 35.723667 342.000000 127.183222 35.723667 337.000000 
 127.183333 35.723667 347.000000 127.183333 35.723667 342.000000 
 127.182222 35.723778 309.000000 127.182222 35.723778 311.000000 
 127.182333 35.723778 309.000000 127.182333 35.723778 310.000000 
 127.182444 35.723778 312.000000 127.182444 35.723778 311.000000 
 127.182556 35.723778 316.000000 127.182556 35.723778 314.000000 
 127.182778 35.723778 323.000000 127.182778 35.723778 322.000000 
 127.183000 35.723778 333.000000 127.183000 35.723778 328.000000 
 127.183111 35.723778 337.000000 127.183111 35.723778 332.000000 
 127.183222 35.723778 342.000000 127.183222 35.723778 337.000000 
 127.183333 35.723778 347.000000 127.183333 35.723778 341.000000 
 127.182333 35.723778 309.000000 127.182333 35.723778 310.000000 
 127.182444 35.723778 312.000000 127.182444 35.723778 311.000000 
 127.182556 35.723778 316.000000 127.182556 35.723778 314.000000 
 127.182667 35.723778 320.000000 127.182667 35.723778 319.000000 
 127.182889 35.723778 328.000000 127.182889 35.723778 324.000000 
 127.183111 35.723778 337.000000 127.183111 35.723778 332.000000 
 127.183222 35.723778 342.000000 127.183222 35.723778 337.000000 
 127.183333 35.723778 347.000000 127.183333 35.723778 341.000000 
 127.183444 35.723778 351.000000 127.183444 35.723778 346.000000 
 127.182333 35.723889 311.000000 127.182333 35.723889 310.000000 
 127.182444 35.723889 314.000000 127.182444 35.723889 312.000000 
 127.182556 35.723889 319.000000 127.182556 35.723889 316.000000 
 127.182667 35.723889 322.000000 127.182667 35.723889 320.000000 
 127.182889 35.723889 328.000000 127.182889 35.723889 325.000000 
 127.183111 35.723889 337.000000 127.183111 35.723889 333.000000 
 127.183222 35.723889 341.000000 127.183222 35.723889 337.000000 
 127.183333 35.723889 346.000000 127.183333 35.723889 341.000000 
 127.183444 35.723889 350.000000 127.183444 35.723889 345.000000 
 127.182333 35.724000 312.000000 127.182333 35.724000 312.000000 
 127.182444 35.724000 316.000000 127.182444 35.724000 313.000000 
 127.182556 35.724000 320.000000 127.182556 35.724000 317.000000 
 127.182667 35.724000 322.000000 127.182667 35.724000 321.000000 
 127.182889 35.724000 329.000000 127.182889 35.724000 327.000000 
 127.183111 35.724000 337.000000 127.183111 35.724000 335.000000 
 127.183222 35.724000 341.000000 127.183222 35.724000 338.000000 
 127.183333 35.724000 345.000000 127.183333 35.724000 342.000000 
 127.183444 35.724000 349.000000 127.183444 35.724000 346.000000 
 127.182444 35.724000 316.000000 127.182444 35.724000 313.000000 
 127.182556 35.724000 320.000000 127.182556 35.724000 317.000000 
 127.182667 35.724000 322.000000 127.182667 35.724000 321.000000 
 127.182778 35.724000 325.000000 127.182778 35.724000 324.000000 
 127.183000 35.724000 333.000000 127.183000 35.724000 331.000000 
 127.183222 35.724000 341.000000 127.183222 35.724000 338.000000 
 127.183333 35.724000 345.000000 127.183333 35.724000 342.000000 
 127.183444 35.724000 349.000000 127.183444 35.724000 346.000000 
 127.183556 35.724000 355.000000 127.183556 35.724000 350.000000 
 127.182444 35.724111 317.000000 127.182444 35.724111 315.000000 
 127.182556 35.724111 321.000000 127.182556 35.724111 317.000000 
 127.182667 35.724111 324.000000 127.182667 35.724111 321.000000 
 127.182778 35.724111 327.000000 127.182778 35.724111 324.000000 
 127.183000 35.724111 335.000000 127.183000 35.724111 331.000000 
 127.183222 35.724111 342.000000 127.183222 35.724111 339.000000 
 127.183333 35.724111 346.000000 127.183333 35.724111 343.000000 
 127.183444 35.724111 350.000000 127.183444 35.724111 347.000000 
 127.183556 35.724111 355.000000 127.183556 35.724111 351.000000 
 127.182444 35.724222 317.000000 127.182444 35.724222 316.000000 
 127.182556 35.724222 321.000000 127.182556 35.724222 316.000000 
 127.182667 35.724222 324.000000 127.182667 35.724222 320.000000 
 127.182778 35.724222 328.000000 127.182778 35.724222 323.000000 
 127.183000 35.724222 335.000000 127.183000 35.724222 331.000000 
 127.183222 35.724222 343.000000 127.183222 35.724222 338.000000 
 127.183333 35.724222 347.000000 127.183333 35.724222 342.000000 
 127.183444 35.724222 351.000000 127.183444 35.724222 346.000000 
 127.183556 35.724222 356.000000 127.183556 35.724222 350.000000 
 127.182556 35.724333 320.000000 127.182556 35.724333 319.000000 
 127.182667 35.724333 323.000000 127.182667 35.724333 320.000000 
 127.182778 35.724333 327.000000 127.182778 35.724333 323.000000 
 127.182889 35.724333 331.000000 127.182889 35.724333 326.000000 
 127.183111 35.724333 338.000000 127.183111 35.724333 334.000000 
 127.183333 35.724333 346.000000 127.183333 35.724333 341.000000 
 127.183444 35.724333 350.000000 127.183444 35.724333 345.000000 
 127.183556 35.724333 356.000000 127.183556 35.724333 349.000000 
 127.183667 35.724333 362.000000 127.183667 35.724333 355.000000 
 127.182556 35.724444 320.000000 127.182556 35.724444 322.000000 
 127.182667 35.724444 323.000000 127.182667 35.724444 320.000000 
 127.182778 35.724444 326.000000 127.182778 35.724444 321.000000 
 127.182889 35.724444 330.000000 127.182889 35.724444 325.000000 
 127.183111 35.724444 337.000000 127.183111 35.724444 332.000000 
 127.183333 35.724444 345.000000 127.183333 35.724444 340.000000 
 127.183444 35.724444 349.000000 127.183444 35.724444 344.000000 
 127.183556 35.724444 355.000000 127.183556 35.724444 348.000000 
 127.183667 35.724444 361.000000 127.183667 35.724444 353.000000 
 127.182556 35.724556 320.000000 127.182556 35.724556 326.000000 
 127.182667 35.724556 321.000000 127.182667 35.724556 323.000000 
 127.182778 35.724556 325.000000 127.182778 35.724556 322.000000 
 127.182889 35.724556 329.000000 127.182889 35.724556 325.000000 
 127.183111 35.724556 336.000000 127.183111 35.724556 332.000000 
 127.183333 35.724556 344.000000 127.183333 35.724556 339.000000 
 127.183444 35.724556 348.000000 127.183444 35.724556 343.000000 
 127.183556 35.724556 353.000000 127.183556 35.724556 347.000000 
 127.183667 35.724556 360.000000 127.183667 35.724556 352.000000 
 127.182667 35.724556 321.000000 127.182667 35.724556 323.000000 
 127.182778 35.724556 325.000000 127.182778 35.724556 322.000000 
 127.182889 35.724556 329.000000 127.182889 35.724556 325.000000 
 127.183000 35.724556 332.000000 127.183000 35.724556 328.000000 
 127.183222 35.724556 340.000000 127.183222 35.724556 335.000000 
 127.183444 35.724556 348.000000 127.183444 35.724556 343.000000 
 127.183556 35.724556 353.000000 127.183556 35.724556 347.000000 
 127.183667 35.724556 360.000000 127.183667 35.724556 352.000000 
 127.183778 35.724556 367.000000 127.183778 35.724556 359.000000 
 127.182667 35.724667 322.000000 127.182667 35.724667 329.000000 
 127.182778 35.724667 325.000000 127.182778 35.724667 329.000000 
 127.182889 35.724667 328.000000 127.182889 35.724667 326.000000 
 127.183000 35.724667 332.000000 127.183000 35.724667 325.000000 
 127.183222 35.724667 339.000000 127.183222 35.724667 334.000000 
 127.183444 35.724667 347.000000 127.183444 35.724667 343.000000 
 127.183556 35.724667 352.000000 127.183556 35.724667 347.000000 
 127.183667 35.724667 359.000000 127.183667 35.724667 352.000000 
 127.183778 35.724667 366.000000 127.183778 35.724667 358.000000 
 127.182667 35.724778 329.000000 127.182667 35.724778 335.000000 
 127.182778 35.724778 326.000000 127.182778 35.724778 335.000000 
 127.182889 35.724778 325.000000 127.182889 35.724778 331.000000 
 127.183000 35.724778 331.000000 127.183000 35.724778 328.000000 
 127.183222 35.724778 338.000000 127.183222 35.724778 334.000000 
 127.183444 35.724778 347.000000 127.183444 35.724778 342.000000 
 127.183556 35.724778 352.000000 127.183556 35.724778 347.000000 
 127.183667 35.724778 358.000000 127.183667 35.724778 352.000000 
 127.183778 35.724778 364.000000 127.183778 35.724778 357.000000 
 127.182778 35.724778 326.000000 127.182778 35.724778 335.000000 
 127.182889 35.724778 325.000000 127.182889 35.724778 331.000000 
 127.183000 35.724778 331.000000 127.183000 35.724778 328.000000 
 127.183111 35.724778 334.000000 127.183111 35.724778 331.000000 
 127.183333 35.724778 343.000000 127.183333 35.724778 338.000000 
 127.183556 35.724778 352.000000 127.183556 35.724778 347.000000 
 127.183667 35.724778 358.000000 127.183667 35.724778 352.000000 
 127.183778 35.724778 364.000000 127.183778 35.724778 357.000000 
 127.183889 35.724778 369.000000 127.183889 35.724778 362.000000 
 127.182778 35.724889 331.000000 127.182778 35.724889 337.000000 
 127.182889 35.724889 328.000000 127.182889 35.724889 335.000000 
 127.183000 35.724889 331.000000 127.183000 35.724889 330.000000 
 127.183111 35.724889 334.000000 127.183111 35.724889 332.000000 
 127.183333 35.724889 342.000000 127.183333 35.724889 338.000000 
 127.183556 35.724889 352.000000 127.183556 35.724889 346.000000 
 127.183667 35.724889 357.000000 127.183667 35.724889 351.000000 
 127.183778 35.724889 362.000000 127.183778 35.724889 355.000000 
 127.183889 35.724889 367.000000 127.183889 35.724889 359.000000 
 127.182778 35.725000 335.000000 127.182778 35.725000 340.000000 
 127.182889 35.725000 330.000000 127.182889 35.725000 336.000000 
 127.183000 35.725000 332.000000 127.183000 35.725000 331.000000 
 127.183111 35.725000 334.000000 127.183111 35.725000 334.000000 
 127.183333 35.725000 342.000000 127.183333 35.725000 342.000000 
 127.183556 35.725000 351.000000 127.183556 35.725000 349.000000 
 127.183667 35.725000 355.000000 127.183667 35.725000 352.000000 
 127.183778 35.725000 359.000000 127.183778 35.725000 356.000000 
 127.183889 35.725000 363.000000 127.183889 35.725000 359.000000 
 127.182778 35.725111 336.000000 127.182778 35.725111 343.000000 
 127.182889 35.725111 331.000000 127.182889 35.725111 337.000000 
 127.183000 35.725111 334.000000 127.183000 35.725111 336.000000 
 127.183111 35.725111 340.000000 127.183111 35.725111 339.000000 
 127.183333 35.725111 345.000000 127.183333 35.725111 344.000000 
 127.183556 35.725111 352.000000 127.183556 35.725111 352.000000 
 127.183667 35.725111 356.000000 127.183667 35.725111 357.000000 
 127.183778 35.725111 359.000000 127.183778 35.725111 361.000000 
 127.183889 35.725111 362.000000 127.183889 35.725111 364.000000 
 127.182889 35.725111 331.000000 127.182889 35.725111 337.000000 
 127.183000 35.725111 334.000000 127.183000 35.725111 336.000000 
 127.183111 35.725111 340.000000 127.183111 35.725111 339.000000 
 127.183222 35.725111 342.000000 127.183222 35.725111 342.000000 
 127.183444 35.725111 349.000000 127.183444 35.725111 348.000000 
 127.183667 35.725111 356.000000 127.183667 35.725111 357.000000 
 127.183778 35.725111 359.000000 127.183778 35.725111 361.000000 
 127.183889 35.725111 362.000000 127.183889 35.725111 364.000000 
 127.184000 35.725111 365.000000 127.184000 35.725111 367.000000 
 127.182889 35.725222 336.000000 127.182889 35.725222 342.000000 
 127.183000 35.725222 339.000000 127.183000 35.725222 340.000000 
 127.183111 35.725222 342.000000 127.183111 35.725222 341.000000 
 127.183222 35.725222 344.000000 127.183222 35.725222 344.000000 
 127.183444 35.725222 352.000000 127.183444 35.725222 350.000000 
 127.183667 35.725222 361.000000 127.183667 35.725222 363.000000 
 127.183778 35.725222 364.000000 127.183778 35.725222 369.000000 
 127.183889 35.725222 367.000000 127.183889 35.725222 373.000000 
 127.184000 35.725222 370.000000 127.184000 35.725222 376.000000 
 127.182889 35.725333 340.000000 127.182889 35.725333 346.000000 
 127.183000 35.725333 341.000000 127.183000 35.725333 341.000000 
 127.183111 35.725333 344.000000 127.183111 35.725333 342.000000 
 127.183222 35.725333 347.000000 127.183222 35.725333 345.000000 
 127.183444 35.725333 356.000000 127.183444 35.725333 353.000000 
 127.183667 35.725333 369.000000 127.183667 35.725333 366.000000 
 127.183778 35.725333 373.000000 127.183778 35.725333 372.000000 
 127.183889 35.725333 376.000000 127.183889 35.725333 378.000000 
 127.184000 35.725333 379.000000 127.184000 35.725333 382.000000 
 127.183000 35.725333 341.000000 127.183000 35.725333 341.000000 
 127.183111 35.725333 344.000000 127.183111 35.725333 342.000000 
 127.183222 35.725333 347.000000 127.183222 35.725333 345.000000 
 127.183333 35.725333 350.000000 127.183333 35.725333 348.000000 
 127.183556 35.725333 363.000000 127.183556 35.725333 359.000000 
 127.183778 35.725333 373.000000 127.183778 35.725333 372.000000 
 127.183889 35.725333 376.000000 127.183889 35.725333 378.000000 
 127.184000 35.725333 379.000000 127.184000 35.725333 382.000000 
 127.184111 35.725333 381.000000 127.184111 35.725333 384.000000 
 127.183000 35.725444 342.000000 127.183000 35.725444 348.000000 
 127.183111 35.725444 345.000000 127.183111 35.725444 346.000000 
 127.183222 35.725444 348.000000 127.183222 35.725444 345.000000 
 127.183333 35.725444 353.000000 127.183333 35.725444 349.000000 
 127.183556 35.725444 366.000000 127.183556 35.725444 362.000000 
 127.183778 35.725444 378.000000 127.183778 35.725444 375.000000 
 127.183889 35.725444 382.000000 127.183889 35.725444 382.000000 
 127.184000 35.725444 384.000000 127.184000 35.725444 388.000000 
 127.184111 35.725444 387.000000 127.184111 35.725444 393.000000 
 127.183000 35.725556 346.000000 127.183000 35.725556 354.000000 
 127.183111 35.725556 345.000000 127.183111 35.725556 352.000000 
 127.183222 35.725556 349.000000 127.183222 35.725556 348.000000 
 127.183333 35.725556 355.000000 127.183333 35.725556 349.000000 
 127.183556 35.725556 368.000000 127.183556 35.725556 361.000000 
 127.183778 35.725556 382.000000 127.183778 35.725556 377.000000 
 127.183889 35.725556 388.000000 127.183889 35.725556 384.000000 
 127.184000 35.725556 393.000000 127.184000 35.725556 391.000000 
 127.184111 35.725556 396.000000 127.184111 35.725556 397.000000 
 127.183111 35.725556 345.000000 127.183111 35.725556 352.000000 
 127.183222 35.725556 349.000000 127.183222 35.725556 348.000000 
 127.183333 35.725556 355.000000 127.183333 35.725556 349.000000 
 127.183444 35.725556 362.000000 127.183444 35.725556 354.000000 
 127.183667 35.725556 375.000000 127.183667 35.725556 369.000000 
 127.183889 35.725556 388.000000 127.183889 35.725556 384.000000 
 127.184000 35.725556 393.000000 127.184000 35.725556 391.000000 
 127.184111 35.725556 396.000000 127.184111 35.725556 397.000000 
 127.184222 35.725556 398.000000 127.184222 35.725556 401.000000 
 127.183111 35.725667 348.000000 127.183111 35.725667 358.000000 
 127.183222 35.725667 349.000000 127.183222 35.725667 354.000000 
 127.183333 35.725667 354.000000 127.183333 35.725667 350.000000 
 127.183444 35.725667 361.000000 127.183444 35.725667 356.000000 
 127.183667 35.725667 377.000000 127.183667 35.725667 371.000000 
 127.183889 35.725667 391.000000 127.183889 35.725667 386.000000 
 127.184000 35.725667 397.000000 127.184000 35.725667 393.000000 
 127.184111 35.725667 401.000000 127.184111 35.725667 401.000000 
 127.184222 35.725667 404.000000 127.184222 35.725667 406.000000 
 127.183111 35.725778 354.000000 127.183111 35.725778 362.000000 
 127.183222 35.725778 350.000000 127.183222 35.725778 357.000000 
 127.183333 35.725778 356.000000 127.183333 35.725778 355.000000 
 127.183444 35.725778 363.000000 127.183444 35.725778 358.000000 
 127.183667 35.725778 378.000000 127.183667 35.725778 372.000000 
 127.183889 35.725778 393.000000 127.183889 35.725778 387.000000 
 127.184000 35.725778 401.000000 127.184000 35.725778 394.000000 
 127.184111 35.725778 406.000000 127.184111 35.725778 402.000000 
 127.184222 35.725778 411.000000 127.184222 35.725778 407.000000 
 127.183111 35.725889 357.000000 127.183111 35.725889 367.000000 
 127.183222 35.725889 355.000000 127.183222 35.725889 362.000000 
 127.183333 35.725889 358.000000 127.183333 35.725889 359.000000 
 127.183444 35.725889 365.000000 127.183444 35.725889 360.000000 
 127.183667 35.725889 379.000000 127.183667 35.725889 373.000000 
 127.183889 35.725889 394.000000 127.183889 35.725889 388.000000 
 127.184000 35.725889 402.000000 127.184000 35.725889 395.000000 
 127.184111 35.725889 407.000000 127.184111 35.725889 402.000000 
 127.184222 35.725889 414.000000 127.184222 35.725889 408.000000 
 127.183222 35.725889 355.000000 127.183222 35.725889 362.000000 
 127.183333 35.725889 358.000000 127.183333 35.725889 359.000000 
 127.183444 35.725889 365.000000 127.183444 35.725889 360.000000 
 127.183556 35.725889 372.000000 127.183556 35.725889 367.000000 
 127.183778 35.725889 387.000000 127.183778 35.725889 381.000000 
 127.184000 35.725889 402.000000 127.184000 35.725889 395.000000 
 127.184111 35.725889 407.000000 127.184111 35.725889 402.000000 
 127.184222 35.725889 414.000000 127.184222 35.725889 408.000000 
 127.184333 35.725889 419.000000 127.184333 35.725889 416.000000 
 127.183222 35.726000 359.000000 127.183222 35.726000 366.000000 
 127.183333 35.726000 360.000000 127.183333 35.726000 361.000000 
 127.183444 35.726000 367.000000 127.183444 35.726000 362.000000 
 127.183556 35.726000 373.000000 127.183556 35.726000 368.000000 
 127.183778 35.726000 388.000000 127.183778 35.726000 382.000000 
 127.184000 35.726000 402.000000 127.184000 35.726000 396.000000 
 127.184111 35.726000 408.000000 127.184111 35.726000 403.000000 
 127.184222 35.726000 416.000000 127.184222 35.726000 409.000000 
 127.184333 35.726000 422.000000 127.184333 35.726000 416.000000 
 127.183222 35.726111 361.000000 127.183222 35.726111 370.000000 
 127.183333 35.726111 362.000000 127.183333 35.726111 366.000000 
 127.183444 35.726111 368.000000 127.183444 35.726111 365.000000 
 127.183556 35.726111 374.000000 127.183556 35.726111 370.000000 
 127.183778 35.726111 389.000000 127.183778 35.726111 383.000000 
 127.184000 35.726111 403.000000 127.184000 35.726111 397.000000 
 127.184111 35.726111 409.000000 127.184111 35.726111 403.000000 
 127.184222 35.726111 416.000000 127.184222 35.726111 409.000000 
 127.184333 35.726111 422.000000 127.184333 35.726111 415.000000 
 127.183333 35.726111 362.000000 127.183333 35.726111 366.000000 
 127.183444 35.726111 368.000000 127.183444 35.726111 365.000000 
 127.183556 35.726111 374.000000 127.183556 35.726111 370.000000 
 127.183667 35.726111 382.000000 127.183667 35.726111 376.000000 
 127.183889 35.726111 396.000000 127.183889 35.726111 390.000000 
 127.184111 35.726111 409.000000 127.184111 35.726111 403.000000 
 127.184222 35.726111 416.000000 127.184222 35.726111 409.000000 
 127.184333 35.726111 422.000000 127.184333 35.726111 415.000000 
 127.184444 35.726111 428.000000 127.184444 35.726111 422.000000 
 127.183333 35.726222 365.000000 127.183333 35.726222 370.000000 
 127.183444 35.726222 370.000000 127.183444 35.726222 368.000000 
 127.183556 35.726222 376.000000 127.183556 35.726222 371.000000 
 127.183667 35.726222 383.000000 127.183667 35.726222 377.000000 
 127.183889 35.726222 397.000000 127.183889 35.726222 391.000000 
 127.184111 35.726222 409.000000 127.184111 35.726222 403.000000 
 127.184222 35.726222 415.000000 127.184222 35.726222 409.000000 
 127.184333 35.726222 422.000000 127.184333 35.726222 415.000000 
 127.184444 35.726222 427.000000 127.184444 35.726222 420.000000 
 127.183333 35.726333 368.000000 127.183333 35.726333 374.000000 
 127.183444 35.726333 371.000000 127.183444 35.726333 372.000000 
 127.183556 35.726333 377.000000 127.183556 35.726333 375.000000 
 127.183667 35.726333 384.000000 127.183667 35.726333 380.000000 
 127.183889 35.726333 397.000000 127.183889 35.726333 392.000000 
 127.184111 35.726333 409.000000 127.184111 35.726333 404.000000 
 127.184222 35.726333 415.000000 127.184222 35.726333 409.000000 
 127.184333 35.726333 420.000000 127.184333 35.726333 414.000000 
 127.184444 35.726333 426.000000 127.184444 35.726333 419.000000 
 127.183444 35.726333 371.000000 127.183444 35.726333 372.000000 
 127.183556 35.726333 377.000000 127.183556 35.726333 375.000000 
 127.183667 35.726333 384.000000 127.183667 35.726333 380.000000 
 127.183778 35.726333 391.000000 127.183778 35.726333 386.000000 
 127.184000 35.726333 403.000000 127.184000 35.726333 398.000000 
 127.184222 35.726333 415.000000 127.184222 35.726333 409.000000 
 127.184333 35.726333 420.000000 127.184333 35.726333 414.000000 
 127.184444 35.726333 426.000000 127.184444 35.726333 419.000000 
 127.184556 35.726333 431.000000 127.184556 35.726333 424.000000 
 127.183444 35.726444 375.000000 127.183444 35.726444 375.000000 
 127.183556 35.726444 380.000000 127.183556 35.726444 377.000000 
 127.183667 35.726444 386.000000 127.183667 35.726444 382.000000 
 127.183778 35.726444 392.000000 127.183778 35.726444 387.000000 
 127.184000 35.726444 404.000000 127.184000 35.726444 398.000000 
 127.184222 35.726444 414.000000 127.184222 35.726444 409.000000 
 127.184333 35.726444 419.000000 127.184333 35.726444 414.000000 
 127.184444 35.726444 424.000000 127.184444 35.726444 419.000000 
 127.184556 35.726444 430.000000 127.184556 35.726444 423.000000 
 127.183444 35.726556 377.000000 127.183444 35.726556 378.000000 
 127.183556 35.726556 382.000000 127.183556 35.726556 379.000000 
 127.183667 35.726556 387.000000 127.183667 35.726556 383.000000 
 127.183778 35.726556 393.000000 127.183778 35.726556 388.000000 
 127.184000 35.726556 404.000000 127.184000 35.726556 399.000000 
 127.184222 35.726556 414.000000 127.184222 35.726556 409.000000 
 127.184333 35.726556 419.000000 127.184333 35.726556 413.000000 
 127.184444 35.726556 423.000000 127.184444 35.726556 418.000000 
 127.184556 35.726556 429.000000 127.184556 35.726556 423.000000 
 127.183444 35.726667 379.000000 127.183444 35.726667 383.000000 
 127.183556 35.726667 383.000000 127.183556 35.726667 383.000000 
 127.183667 35.726667 388.000000 127.183667 35.726667 385.000000 
 127.183778 35.726667 394.000000 127.183778 35.726667 390.000000 
 127.184000 35.726667 404.000000 127.184000 35.726667 399.000000 
 127.184222 35.726667 413.000000 127.184222 35.726667 409.000000 
 127.184333 35.726667 418.000000 127.184333 35.726667 414.000000 
 127.184444 35.726667 423.000000 127.184444 35.726667 419.000000 
 127.184556 35.726667 428.000000 127.184556 35.726667 423.000000 
 127.183556 35.726667 383.000000 127.183556 35.726667 383.000000 
 127.183667 35.726667 388.000000 127.183667 35.726667 385.000000 
 127.183778 35.726667 394.000000 127.183778 35.726667 390.000000 
 127.183889 35.726667 399.000000 127.183889 35.726667 395.000000 
 127.184111 35.726667 409.000000 127.184111 35.726667 405.000000 
 127.184333 35.726667 418.000000 127.184333 35.726667 414.000000 
 127.184444 35.726667 423.000000 127.184444 35.726667 419.000000 
 127.184556 35.726667 428.000000 127.184556 35.726667 423.000000 
 127.184667 35.726667 434.000000 127.184667 35.726667 428.000000 
 127.183556 35.726778 385.000000 127.183556 35.726778 387.000000 
 127.183667 35.726778 390.000000 127.183667 35.726778 387.000000 
 127.183778 35.726778 395.000000 127.183778 35.726778 391.000000 
 127.183889 35.726778 399.000000 127.183889 35.726778 396.000000 
 127.184111 35.726778 409.000000 127.184111 35.726778 406.000000 
 127.184333 35.726778 419.000000 127.184333 35.726778 415.000000 
 127.184444 35.726778 423.000000 127.184444 35.726778 420.000000 
 127.184556 35.726778 428.000000 127.184556 35.726778 424.000000 
 127.184667 35.726778 434.000000 127.184667 35.726778 430.000000 
 127.183556 35.726889 387.000000 127.183556 35.726889 394.000000 
 127.183667 35.726889 391.000000 127.183667 35.726889 393.000000 
 127.183778 35.726889 396.000000 127.183778 35.726889 394.000000 
 127.183889 35.726889 400.000000 127.183889 35.726889 398.000000 
 127.184111 35.726889 411.000000 127.184111 35.726889 408.000000 
 127.184333 35.726889 420.000000 127.184333 35.726889 418.000000 
 127.184444 35.726889 424.000000 127.184444 35.726889 423.000000 
 127.184556 35.726889 430.000000 127.184556 35.726889 428.000000 
 127.184667 35.726889 436.000000 127.184667 35.726889 434.000000 
 127.183667 35.726889 391.000000 127.183667 35.726889 393.000000 
 127.183778 35.726889 396.000000 127.183778 35.726889 394.000000 
 127.183889 35.726889 400.000000 127.183889 35.726889 398.000000 
 127.184000 35.726889 406.000000 127.184000 35.726889 403.000000 
 127.184222 35.726889 415.000000 127.184222 35.726889 413.000000 
 127.184444 35.726889 424.000000 127.184444 35.726889 423.000000 
 127.184556 35.726889 430.000000 127.184556 35.726889 428.000000 
 127.184667 35.726889 436.000000 127.184667 35.726889 434.000000 
 127.184778 35.726889 441.000000 127.184778 35.726889 440.000000 
 127.183667 35.727000 394.000000 127.183667 35.727000 398.000000 
 127.183778 35.727000 398.000000 127.183778 35.727000 397.000000 
 127.183889 35.727000 403.000000 127.183889 35.727000 400.000000 
 127.184000 35.727000 408.000000 127.184000 35.727000 404.000000 
 127.184222 35.727000 418.000000 127.184222 35.727000 414.000000 
 127.184444 35.727000 428.000000 127.184444 35.727000 425.000000 
 127.184556 35.727000 434.000000 127.184556 35.727000 431.000000 
 127.184667 35.727000 440.000000 127.184667 35.727000 437.000000 
 127.184778 35.727000 446.000000 127.184778 35.727000 443.000000 
 127.183667 35.727111 397.000000 127.183667 35.727111 406.000000 
 127.183778 35.727111 400.000000 127.183778 35.727111 403.000000 
 127.183889 35.727111 404.000000 127.183889 35.727111 403.000000 
 127.184000 35.727111 409.000000 127.184000 35.727111 407.000000 
 127.184222 35.727111 419.000000 127.184222 35.727111 416.000000 
 127.184444 35.727111 431.000000 127.184444 35.727111 427.000000 
 127.184556 35.727111 437.000000 127.184556 35.727111 434.000000 
 127.184667 35.727111 443.000000 127.184667 35.727111 441.000000 
 127.184778 35.727111 450.000000 127.184778 35.727111 448.000000 
 127.183778 35.727111 400.000000 127.183778 35.727111 403.000000 
 127.183889 35.727111 404.000000 127.183889 35.727111 403.000000 
 127.184000 35.727111 409.000000 127.184000 35.727111 407.000000 
 127.184111 35.727111 414.000000 127.184111 35.727111 411.000000 
 127.184333 35.727111 425.000000 127.184333 35.727111 421.000000 
 127.184556 35.727111 437.000000 127.184556 35.727111 434.000000 
 127.184667 35.727111 443.000000 127.184667 35.727111 441.000000 
 127.184778 35.727111 450.000000 127.184778 35.727111 448.000000 
 127.184889 35.727111 456.000000 127.184889 35.727111 455.000000 
 127.183778 35.727222 403.000000 127.183778 35.727222 409.000000 
 127.183889 35.727222 407.000000 127.183889 35.727222 407.000000 
 127.184000 35.727222 411.000000 127.184000 35.727222 408.000000 
 127.184111 35.727222 416.000000 127.184111 35.727222 412.000000 
 127.184333 35.727222 427.000000 127.184333 35.727222 422.000000 
 127.184556 35.727222 441.000000 127.184556 35.727222 435.000000 
 127.184667 35.727222 448.000000 127.184667 35.727222 443.000000 
 127.184778 35.727222 455.000000 127.184778 35.727222 450.000000 
 127.184889 35.727222 462.000000 127.184889 35.727222 457.000000 
 127.183778 35.727333 407.000000 127.183778 35.727333 416.000000 
 127.183889 35.727333 408.000000 127.183889 35.727333 413.000000 
 127.184000 35.727333 412.000000 127.184000 35.727333 412.000000 
 127.184111 35.727333 417.000000 127.184111 35.727333 414.000000 
 127.184333 35.727333 429.000000 127.184333 35.727333 423.000000 
 127.184556 35.727333 443.000000 127.184556 35.727333 436.000000 
 127.184667 35.727333 450.000000 127.184667 35.727333 444.000000 
 127.184778 35.727333 457.000000 127.184778 35.727333 451.000000 
 127.184889 35.727333 465.000000 127.184889 35.727333 459.000000 
 127.183889 35.727333 408.000000 127.183889 35.727333 413.000000 
 127.184000 35.727333 412.000000 127.184000 35.727333 412.000000 
 127.184111 35.727333 417.000000 127.184111 35.727333 414.000000 
 127.184222 35.727333 422.000000 127.184222 35.727333 419.000000 
 127.184444 35.727333 435.000000 127.184444 35.727333 430.000000 
 127.184667 35.727333 450.000000 127.184667 35.727333 444.000000 
 127.184778 35.727333 457.000000 127.184778 35.727333 451.000000 
 127.184889 35.727333 465.000000 127.184889 35.727333 459.000000 
 127.185000 35.727333 473.000000 127.185000 35.727333 467.000000 
 127.183889 35.727444 412.000000 127.183889 35.727444 418.000000 
 127.184000 35.727444 414.000000 127.184000 35.727444 416.000000 
 127.184111 35.727444 419.000000 127.184111 35.727444 416.000000 
 127.184222 35.727444 423.000000 127.184222 35.727444 420.000000 
 127.184444 35.727444 436.000000 127.184444 35.727444 430.000000 
 127.184667 35.727444 451.000000 127.184667 35.727444 445.000000 
 127.184778 35.727444 459.000000 127.184778 35.727444 452.000000 
 127.184889 35.727444 467.000000 127.184889 35.727444 460.000000 
 127.185000 35.727444 475.000000 127.185000 35.727444 468.000000 
 127.183889 35.727556 416.000000 127.183889 35.727556 426.000000 
 127.184000 35.727556 416.000000 127.184000 35.727556 423.000000 
 127.184111 35.727556 420.000000 127.184111 35.727556 421.000000 
 127.184222 35.727556 424.000000 127.184222 35.727556 422.000000 
 127.184444 35.727556 437.000000 127.184444 35.727556 432.000000 
 127.184667 35.727556 452.000000 127.184667 35.727556 445.000000 
 127.184778 35.727556 460.000000 127.184778 35.727556 452.000000 
 127.184889 35.727556 468.000000 127.184889 35.727556 460.000000 
 127.185000 35.727556 476.000000 127.185000 35.727556 469.000000 
 127.183889 35.727667 423.000000 127.183889 35.727667 432.000000 
 127.184000 35.727667 421.000000 127.184000 35.727667 428.000000 
 127.184111 35.727667 422.000000 127.184111 35.727667 424.000000 
 127.184222 35.727667 425.000000 127.184222 35.727667 424.000000 
 127.184444 35.727667 438.000000 127.184444 35.727667 433.000000 
 127.184667 35.727667 452.000000 127.184667 35.727667 445.000000 
 127.184778 35.727667 460.000000 127.184778 35.727667 452.000000 
 127.184889 35.727667 469.000000 127.184889 35.727667 461.000000 
 127.185000 35.727667 478.000000 127.185000 35.727667 470.000000 
 127.184000 35.727667 421.000000 127.184000 35.727667 428.000000 
 127.184111 35.727667 422.000000 127.184111 35.727667 424.000000 
 127.184222 35.727667 425.000000 127.184222 35.727667 424.000000 
 127.184333 35.727667 432.000000 127.184333 35.727667 427.000000 
 127.184556 35.727667 445.000000 127.184556 35.727667 438.000000 
 127.184778 35.727667 460.000000 127.184778 35.727667 452.000000 
 127.184889 35.727667 469.000000 127.184889 35.727667 461.000000 
 127.185000 35.727667 478.000000 127.185000 35.727667 470.000000 
 127.185111 35.727667 485.000000 127.185111 35.727667 478.000000 
 127.184000 35.727778 424.000000 127.184000 35.727778 437.000000 
 127.184111 35.727778 424.000000 127.184111 35.727778 434.000000 
 127.184222 35.727778 427.000000 127.184222 35.727778 430.000000 
 127.184333 35.727778 433.000000 127.184333 35.727778 430.000000 
 127.184556 35.727778 445.000000 127.184556 35.727778 439.000000 
 127.184778 35.727778 461.000000 127.184778 35.727778 453.000000 
 127.184889 35.727778 470.000000 127.184889 35.727778 462.000000 
 127.185000 35.727778 478.000000 127.185000 35.727778 471.000000 
 127.185111 35.727778 486.000000 127.185111 35.727778 480.000000 
 127.184000 35.727889 434.000000 127.184000 35.727889 443.000000 
 127.184111 35.727889 430.000000 127.184111 35.727889 440.000000 
 127.184222 35.727889 430.000000 127.184222 35.727889 436.000000 
 127.184333 35.727889 434.000000 127.184333 35.727889 434.000000 
 127.184556 35.727889 445.000000 127.184556 35.727889 439.000000 
 127.184778 35.727889 462.000000 127.184778 35.727889 453.000000 
 127.184889 35.727889 471.000000 127.184889 35.727889 462.000000 
 127.185000 35.727889 480.000000 127.185000 35.727889 472.000000 
 127.185111 35.727889 488.000000 127.185111 35.727889 481.000000 
 127.184111 35.727889 430.000000 127.184111 35.727889 440.000000 
 127.184222 35.727889 430.000000 127.184222 35.727889 436.000000 
 127.184333 35.727889 434.000000 127.184333 35.727889 434.000000 
 127.184444 35.727889 439.000000 127.184444 35.727889 434.000000 
 127.184667 35.727889 453.000000 127.184667 35.727889 446.000000 
 127.184889 35.727889 471.000000 127.184889 35.727889 462.000000 
 127.185000 35.727889 480.000000 127.185000 35.727889 472.000000 
 127.185111 35.727889 488.000000 127.185111 35.727889 481.000000 
 127.185222 35.727889 496.000000 127.185222 35.727889 489.000000 
 127.184111 35.728000 436.000000 127.184111 35.728000 447.000000 
 127.184222 35.728000 434.000000 127.184222 35.728000 444.000000 
 127.184333 35.728000 434.000000 127.184333 35.728000 441.000000 
 127.184444 35.728000 439.000000 127.184444 35.728000 440.000000 
 127.184667 35.728000 453.000000 127.184667 35.728000 446.000000 
 127.184889 35.728000 472.000000 127.184889 35.728000 463.000000 
 127.185000 35.728000 481.000000 127.185000 35.728000 474.000000 
 127.185111 35.728000 489.000000 127.185111 35.728000 482.000000 
 127.185222 35.728000 497.000000 127.185222 35.728000 491.000000 
 127.184111 35.728111 444.000000 127.184111 35.728111 453.000000 
 127.184222 35.728111 441.000000 127.184222 35.728111 448.000000 
 127.184333 35.728111 440.000000 127.184333 35.728111 446.000000 
 127.184444 35.728111 440.000000 127.184444 35.728111 443.000000 
 127.184667 35.728111 453.000000 127.184667 35.728111 445.000000 
 127.184889 35.728111 474.000000 127.184889 35.728111 464.000000 
 127.185000 35.728111 482.000000 127.185000 35.728111 474.000000 
 127.185111 35.728111 491.000000 127.185111 35.728111 483.000000 
 127.185222 35.728111 500.000000 127.185222 35.728111 492.000000 
 127.184222 35.728111 441.000000 127.184222 35.728111 448.000000 
 127.184333 35.728111 440.000000 127.184333 35.728111 446.000000 
 127.184444 35.728111 440.000000 127.184444 35.728111 443.000000 
 127.184556 35.728111 446.000000 127.184556 35.728111 442.000000 
 127.184778 35.728111 463.000000 127.184778 35.728111 454.000000 
 127.185000 35.728111 482.000000 127.185000 35.728111 474.000000 
 127.185111 35.728111 491.000000 127.185111 35.728111 483.000000 
 127.185222 35.728111 500.000000 127.185222 35.728111 492.000000 
 127.185333 35.728111 504.000000 127.185333 35.728111 500.000000 
 127.184222 35.728222 446.000000 127.184222 35.728222 455.000000 
 127.184333 35.728222 443.000000 127.184333 35.728222 450.000000 
 127.184444 35.728222 442.000000 127.184444 35.728222 448.000000 
 127.184556 35.728222 445.000000 127.184556 35.728222 446.000000 
 127.184778 35.728222 464.000000 127.184778 35.728222 454.000000 
 127.185000 35.728222 483.000000 127.185000 35.728222 475.000000 
 127.185111 35.728222 492.000000 127.185111 35.728222 484.000000 
 127.185222 35.728222 500.000000 127.185222 35.728222 493.000000 
 127.185333 35.728222 504.000000 127.185333 35.728222 501.000000 
 127.184222 35.728333 450.000000 127.184222 35.728333 464.000000 
 127.184333 35.728333 448.000000 127.184333 35.728333 460.000000 
 127.184444 35.728333 446.000000 127.184444 35.728333 456.000000 
 127.184556 35.728333 446.000000 127.184556 35.728333 453.000000 
 127.184778 35.728333 465.000000 127.184778 35.728333 456.000000 
 127.185000 35.728333 484.000000 127.185000 35.728333 477.000000 
 127.185111 35.728333 493.000000 127.185111 35.728333 486.000000 
 127.185222 35.728333 501.000000 127.185222 35.728333 495.000000 
 127.185333 35.728333 505.000000 127.185333 35.728333 502.000000 
 127.184222 35.728444 460.000000 127.184222 35.728444 469.000000 
 127.184333 35.728444 456.000000 127.184333 35.728444 465.000000 
 127.184444 35.728444 453.000000 127.184444 35.728444 461.000000 
 127.184556 35.728444 451.000000 127.184556 35.728444 458.000000 
 127.184778 35.728444 467.000000 127.184778 35.728444 459.000000 
 127.185000 35.728444 486.000000 127.185000 35.728444 478.000000 
 127.185111 35.728444 495.000000 127.185111 35.728444 487.000000 
 127.185222 35.728444 502.000000 127.185222 35.728444 496.000000 
 127.185333 35.728444 508.000000 127.185333 35.728444 502.000000 
 127.184333 35.728444 456.000000 127.184333 35.728444 465.000000 
 127.184444 35.728444 453.000000 127.184444 35.728444 461.000000 
 127.184556 35.728444 451.000000 127.184556 35.728444 458.000000 
 127.184667 35.728444 456.000000 127.184667 35.728444 458.000000 
 127.184889 35.728444 477.000000 127.184889 35.728444 468.000000 
 127.185111 35.728444 495.000000 127.185111 35.728444 487.000000 
 127.185222 35.728444 502.000000 127.185222 35.728444 496.000000 
 127.185333 35.728444 508.000000 127.185333 35.728444 502.000000 
 127.185444 35.728444 515.000000 127.185444 35.728444 509.000000 
 127.184333 35.728556 461.000000 127.184333 35.728556 471.000000 
 127.184444 35.728556 458.000000 127.184444 35.728556 467.000000 
 127.184556 35.728556 458.000000 127.184556 35.728556 466.000000 
 127.184667 35.728556 459.000000 127.184667 35.728556 467.000000 
 127.184889 35.728556 478.000000 127.184889 35.728556 472.000000 
 127.185111 35.728556 496.000000 127.185111 35.728556 489.000000 
 127.185222 35.728556 502.000000 127.185222 35.728556 498.000000 
 127.185333 35.728556 509.000000 127.185333 35.728556 503.000000 
 127.185444 35.728556 516.000000 127.185444 35.728556 511.000000 
 127.184333 35.728667 467.000000 127.184333 35.728667 475.000000 
 127.184444 35.728667 466.000000 127.184444 35.728667 471.000000 
 127.184556 35.728667 467.000000 127.184556 35.728667 472.000000 
 127.184667 35.728667 469.000000 127.184667 35.728667 474.000000 
 127.184889 35.728667 480.000000 127.184889 35.728667 478.000000 
 127.185111 35.728667 498.000000 127.185111 35.728667 491.000000 
 127.185222 35.728667 503.000000 127.185222 35.728667 499.000000 
 127.185333 35.728667 511.000000 127.185333 35.728667 504.000000 
 127.185444 35.728667 520.000000 127.185444 35.728667 513.000000 
 127.184444 35.728667 466.000000 127.184444 35.728667 471.000000 
 127.184556 35.728667 467.000000 127.184556 35.728667 472.000000 
 127.184667 35.728667 469.000000 127.184667 35.728667 474.000000 
 127.184778 35.728667 472.000000 127.184778 35.728667 476.000000 
 127.185000 35.728667 489.000000 127.185000 35.728667 481.000000 
 127.185222 35.728667 503.000000 127.185222 35.728667 499.000000 
 127.185333 35.728667 511.000000 127.185333 35.728667 504.000000 
 127.185444 35.728667 520.000000 127.185444 35.728667 513.000000 
 127.185556 35.728667 525.000000 127.185556 35.728667 522.000000 
 127.184444 35.728778 472.000000 127.184444 35.728778 483.000000 
 127.184556 35.728778 474.000000 127.184556 35.728778 484.000000 
 127.184667 35.728778 476.000000 127.184667 35.728778 486.000000 
 127.184778 35.728778 478.000000 127.184778 35.728778 487.000000 
 127.185000 35.728778 491.000000 127.185000 35.728778 489.000000 
 127.185222 35.728778 504.000000 127.185222 35.728778 500.000000 
 127.185333 35.728778 513.000000 127.185333 35.728778 506.000000 
 127.185444 35.728778 522.000000 127.185444 35.728778 515.000000 
 127.185556 35.728778 527.000000 127.185556 35.728778 525.000000 
 127.184444 35.728889 484.000000 127.184444 35.728889 491.000000 
 127.184556 35.728889 486.000000 127.184556 35.728889 492.000000 
 127.184667 35.728889 487.000000 127.184667 35.728889 494.000000 
 127.184778 35.728889 488.000000 127.184778 35.728889 494.000000 
 127.185000 35.728889 493.000000 127.185000 35.728889 496.000000 
 127.185222 35.728889 506.000000 127.185222 35.728889 501.000000 
 127.185333 35.728889 515.000000 127.185333 35.728889 508.000000 
 127.185444 35.728889 525.000000 127.185444 35.728889 516.000000 
 127.185556 35.728889 530.000000 127.185556 35.728889 526.000000 
 127.184556 35.728889 486.000000 127.184556 35.728889 492.000000 
 127.184667 35.728889 487.000000 127.184667 35.728889 494.000000 
 127.184778 35.728889 488.000000 127.184778 35.728889 494.000000 
 127.184889 35.728889 489.000000 127.184889 35.728889 495.000000 
 127.185111 35.728889 500.000000 127.185111 35.728889 497.000000 
 127.185333 35.728889 515.000000 127.185333 35.728889 508.000000 
 127.185444 35.728889 525.000000 127.185444 35.728889 516.000000 
 127.185556 35.728889 530.000000 127.185556 35.728889 526.000000 
 127.185667 35.728889 535.000000 127.185667 35.728889 531.000000 
 127.184556 35.729000 494.000000 127.184556 35.729000 502.000000 
 127.184667 35.729000 494.000000 127.184667 35.729000 504.000000 
 127.184778 35.729000 495.000000 127.184778 35.729000 506.000000 
 127.184889 35.729000 496.000000 127.184889 35.729000 506.000000 
 127.185111 35.729000 501.000000 127.185111 35.729000 507.000000 
 127.185333 35.729000 516.000000 127.185333 35.729000 510.000000 
 127.185444 35.729000 526.000000 127.185444 35.729000 517.000000 
 127.185556 35.729000 531.000000 127.185556 35.729000 527.000000 
 127.185667 35.729000 537.000000 127.185667 35.729000 533.000000 
 127.184556 35.729111 504.000000 127.184556 35.729111 508.000000 
 127.184667 35.729111 506.000000 127.184667 35.729111 510.000000 
 127.184778 35.729111 506.000000 127.184778 35.729111 512.000000 
 127.184889 35.729111 507.000000 127.184889 35.729111 514.000000 
 127.185111 35.729111 507.000000 127.185111 35.729111 514.000000 
 127.185333 35.729111 517.000000 127.185333 35.729111 514.000000 
 127.185444 35.729111 527.000000 127.185444 35.729111 517.000000 
 127.185556 35.729111 533.000000 127.185556 35.729111 527.000000 
 127.185667 35.729111 539.000000 127.185667 35.729111 535.000000 
 127.184667 35.729111 506.000000 127.184667 35.729111 510.000000 
 127.184778 35.729111 506.000000 127.184778 35.729111 512.000000 
 127.184889 35.729111 507.000000 127.184889 35.729111 514.000000 
 127.185000 35.729111 507.000000 127.185000 35.729111 514.000000 
 127.185222 35.729111 510.000000 127.185222 35.729111 514.000000 
 127.185444 35.729111 527.000000 127.185444 35.729111 517.000000 
 127.185556 35.729111 533.000000 127.185556 35.729111 527.000000 
 127.185667 35.729111 539.000000 127.185667 35.729111 535.000000 
 127.185778 35.729111 545.000000 127.185778 35.729111 541.000000 
 127.184667 35.729222 512.000000 127.184667 35.729222 518.000000 
 127.184778 35.729222 514.000000 127.184778 35.729222 521.000000 
 127.184889 35.729222 514.000000 127.184889 35.729222 524.000000 
 127.185000 35.729222 514.000000 127.185000 35.729222 525.000000 
 127.185222 35.729222 514.000000 127.185222 35.729222 526.000000 
 127.185444 35.729222 527.000000 127.185444 35.729222 526.000000 
 127.185556 35.729222 535.000000 127.185556 35.729222 530.000000 
 127.185667 35.729222 541.000000 127.185667 35.729222 537.000000 
 127.185778 35.729222 548.000000 127.185778 35.729222 544.000000 
 127.184667 35.729333 521.000000 127.184667 35.729333 523.000000 
 127.184778 35.729333 524.000000 127.184778 35.729333 525.000000 
 127.184889 35.729333 525.000000 127.184889 35.729333 527.000000 
 127.185000 35.729333 526.000000 127.185000 35.729333 529.000000 
 127.185222 35.729333 526.000000 127.185222 35.729333 530.000000 
 127.185444 35.729333 530.000000 127.185444 35.729333 532.000000 
 127.185556 35.729333 537.000000 127.185556 35.729333 535.000000 
 127.185667 35.729333 544.000000 127.185667 35.729333 541.000000 
 127.185778 35.729333 551.000000 127.185778 35.729333 547.000000 
 127.184667 35.729444 525.000000 127.184667 35.729444 525.000000 
 127.184778 35.729444 527.000000 127.184778 35.729444 528.000000 
 127.184889 35.729444 529.000000 127.184889 35.729444 530.000000 
 127.185000 35.729444 530.000000 127.185000 35.729444 533.000000 
 127.185222 35.729444 531.000000 127.185222 35.729444 536.000000 
 127.185444 35.729444 535.000000 127.185444 35.729444 540.000000 
 127.185556 35.729444 541.000000 127.185556 35.729444 545.000000 
 127.185667 35.729444 547.000000 127.185667 35.729444 548.000000 
 127.185778 35.729444 553.000000 127.185778 35.729444 552.000000 
 127.184778 35.729444 527.000000 127.184778 35.729444 528.000000 
 127.184889 35.729444 529.000000 127.184889 35.729444 530.000000 
 127.185000 35.729444 530.000000 127.185000 35.729444 533.000000 
 127.185111 35.729444 530.000000 127.185111 35.729444 535.000000 
 127.185333 35.729444 532.000000 127.185333 35.729444 538.000000 
 127.185556 35.729444 541.000000 127.185556 35.729444 545.000000 
 127.185667 35.729444 547.000000 127.185667 35.729444 548.000000 
 127.185778 35.729444 553.000000 127.185778 35.729444 552.000000 
 127.185889 35.729444 560.000000 127.185889 35.729444 557.000000 
 127.184778 35.729556 530.000000 127.184778 35.729556 529.000000 
 127.184889 35.729556 533.000000 127.184889 35.729556 532.000000 
 127.185000 35.729556 535.000000 127.185000 35.729556 535.000000 
 127.185111 35.729556 536.000000 127.185111 35.729556 537.000000 
 127.185333 35.729556 540.000000 127.185333 35.729556 542.000000 
 127.185556 35.729556 548.000000 127.185556 35.729556 550.000000 
 127.185667 35.729556 552.000000 127.185667 35.729556 552.000000 
 127.185778 35.729556 557.000000 127.185778 35.729556 556.000000 
 127.185889 35.729556 563.000000 127.185889 35.729556 560.000000 
 127.184778 35.729667 532.000000 127.184778 35.729667 528.000000 
 127.184889 35.729667 535.000000 127.184889 35.729667 531.000000 
 127.185000 35.729667 537.000000 127.185000 35.729667 535.000000 
 127.185111 35.729667 540.000000 127.185111 35.729667 538.000000 
 127.185333 35.729667 546.000000 127.185333 35.729667 545.000000 
 127.185556 35.729667 552.000000 127.185556 35.729667 552.000000 
 127.185667 35.729667 556.000000 127.185667 35.729667 555.000000 
 127.185778 35.729667 560.000000 127.185778 35.729667 559.000000 
 127.185889 35.729667 565.000000 127.185889 35.729667 564.000000 
 127.184889 35.729667 535.000000 127.184889 35.729667 531.000000 
 127.185000 35.729667 537.000000 127.185000 35.729667 535.000000 
 127.185111 35.729667 540.000000 127.185111 35.729667 538.000000 
 127.185222 35.729667 542.000000 127.185222 35.729667 542.000000 
 127.185444 35.729667 550.000000 127.185444 35.729667 549.000000 
 127.185667 35.729667 556.000000 127.185667 35.729667 555.000000 
 127.185778 35.729667 560.000000 127.185778 35.729667 559.000000 
 127.185889 35.729667 565.000000 127.185889 35.729667 564.000000 
 127.186000 35.729667 570.000000 127.186000 35.729667 567.000000 
 127.184889 35.729778 535.000000 127.184889 35.729778 530.000000 
 127.185000 35.729778 538.000000 127.185000 35.729778 533.000000 
 127.185111 35.729778 542.000000 127.185111 35.729778 537.000000 
 127.185222 35.729778 545.000000 127.185222 35.729778 541.000000 
 127.185444 35.729778 552.000000 127.185444 35.729778 548.000000 
 127.185667 35.729778 559.000000 127.185667 35.729778 556.000000 
 127.185778 35.729778 564.000000 127.185778 35.729778 559.000000 
 127.185889 35.729778 567.000000 127.185889 35.729778 564.000000 
 127.186000 35.729778 568.000000 127.186000 35.729778 565.000000 
 127.184889 35.729889 533.000000 127.184889 35.729889 528.000000 
 127.185000 35.729889 537.000000 127.185000 35.729889 532.000000 
 127.185111 35.729889 541.000000 127.185111 35.729889 535.000000 
 127.185222 35.729889 544.000000 127.185222 35.729889 539.000000 
 127.185444 35.729889 552.000000 127.185444 35.729889 547.000000 
 127.185667 35.729889 559.000000 127.185667 35.729889 555.000000 
 127.185778 35.729889 564.000000 127.185778 35.729889 558.000000 
 127.185889 35.729889 565.000000 127.185889 35.729889 561.000000 
 127.186000 35.729889 565.000000 127.186000 35.729889 563.000000 
 127.185000 35.729889 537.000000 127.185000 35.729889 532.000000 
 127.185111 35.729889 541.000000 127.185111 35.729889 535.000000 
 127.185222 35.729889 544.000000 127.185222 35.729889 539.000000 
 127.185333 35.729889 548.000000 127.185333 35.729889 543.000000 
 127.185556 35.729889 556.000000 127.185556 35.729889 551.000000 
 127.185778 35.729889 564.000000 127.185778 35.729889 558.000000 
 127.185889 35.729889 565.000000 127.185889 35.729889 561.000000 
 127.186000 35.729889 565.000000 127.186000 35.729889 563.000000 
 127.186111 35.729889 556.000000 127.186111 35.729889 555.000000 
 127.185000 35.730000 535.000000 127.185000 35.730000 529.000000 
 127.185111 35.730000 539.000000 127.185111 35.730000 532.000000 
 127.185222 35.730000 543.000000 127.185222 35.730000 536.000000 
 127.185333 35.730000 547.000000 127.185333 35.730000 540.000000 
 127.185556 35.730000 555.000000 127.185556 35.730000 548.000000 
 127.185778 35.730000 561.000000 127.185778 35.730000 554.000000 
 127.185889 35.730000 563.000000 127.185889 35.730000 556.000000 
 127.186000 35.730000 555.000000 127.186000 35.730000 556.000000 
 127.186111 35.730000 549.000000 127.186111 35.730000 551.000000 
 127.185000 35.730111 532.000000 127.185000 35.730111 527.000000 
 127.185111 35.730111 536.000000 127.185111 35.730111 530.000000 
 127.185222 35.730111 540.000000 127.185222 35.730111 534.000000 
 127.185333 35.730111 544.000000 127.185333 35.730111 538.000000 
 127.185556 35.730111 552.000000 127.185556 35.730111 546.000000 
 127.185778 35.730111 556.000000 127.185778 35.730111 552.000000 
 127.185889 35.730111 556.000000 127.185889 35.730111 552.000000 
 127.186000 35.730111 551.000000 127.186000 35.730111 550.000000 
 127.186111 35.730111 544.000000 127.186111 35.730111 546.000000 
 127.185111 35.730111 536.000000 127.185111 35.730111 530.000000 
 127.185222 35.730111 540.000000 127.185222 35.730111 534.000000 
 127.185333 35.730111 544.000000 127.185333 35.730111 538.000000 
 127.185444 35.730111 548.000000 127.185444 35.730111 542.000000 
 127.185667 35.730111 554.000000 127.185667 35.730111 550.000000 
 127.185889 35.730111 556.000000 127.185889 35.730111 552.000000 
 127.186000 35.730111 551.000000 127.186000 35.730111 550.000000 
 127.186111 35.730111 544.000000 127.186111 35.730111 546.000000 
 127.186222 35.730111 538.000000 127.186222 35.730111 540.000000 
 127.185111 35.730222 534.000000 127.185111 35.730222 527.000000 
 127.185222 35.730222 538.000000 127.185222 35.730222 531.000000 
 127.185333 35.730222 542.000000 127.185333 35.730222 535.000000 
 127.185444 35.730222 546.000000 127.185444 35.730222 539.000000 
 127.185667 35.730222 552.000000 127.185667 35.730222 544.000000 
 127.185889 35.730222 550.000000 127.185889 35.730222 545.000000 
 127.186000 35.730222 546.000000 127.186000 35.730222 542.000000 
 127.186111 35.730222 540.000000 127.186111 35.730222 539.000000 
 127.186222 35.730222 534.000000 127.186222 35.730222 534.000000 
 127.185111 35.730333 531.000000 127.185111 35.730333 525.000000 
 127.185222 35.730333 535.000000 127.185222 35.730333 529.000000 
 127.185333 35.730333 539.000000 127.185333 35.730333 533.000000 
 127.185444 35.730333 542.000000 127.185444 35.730333 537.000000 
 127.185667 35.730333 545.000000 127.185667 35.730333 539.000000 
 127.185889 35.730333 542.000000 127.185889 35.730333 538.000000 
 127.186000 35.730333 539.000000 127.186000 35.730333 536.000000 
 127.186111 35.730333 534.000000 127.186111 35.730333 534.000000 
 127.186222 35.730333 529.000000 127.186222 35.730333 530.000000 
 127.185111 35.730444 529.000000 127.185111 35.730444 521.000000 
 127.185222 35.730444 533.000000 127.185222 35.730444 526.000000 
 127.185333 35.730444 537.000000 127.185333 35.730444 530.000000 
 127.185444 35.730444 539.000000 127.185444 35.730444 532.000000 
 127.185667 35.730444 539.000000 127.185667 35.730444 532.000000 
 127.185889 35.730444 536.000000 127.185889 35.730444 529.000000 
 127.186000 35.730444 534.000000 127.186000 35.730444 527.000000 
 127.186111 35.730444 530.000000 127.186111 35.730444 525.000000 
 127.186222 35.730444 525.000000 127.186222 35.730444 521.000000 
 127.185222 35.730444 533.000000 127.185222 35.730444 526.000000 
 127.185333 35.730444 537.000000 127.185333 35.730444 530.000000 
 127.185444 35.730444 539.000000 127.185444 35.730444 532.000000 
 127.185556 35.730444 539.000000 127.185556 35.730444 533.000000 
 127.185778 35.730444 538.000000 127.185778 35.730444 531.000000 
 127.186000 35.730444 534.000000 127.186000 35.730444 527.000000 
 127.186111 35.730444 530.000000 127.186111 35.730444 525.000000 
 127.186222 35.730444 525.000000 127.186222 35.730444 521.000000 
 127.186333 35.730444 517.000000 127.186333 35.730444 514.000000 
 127.185222 35.730556 530.000000 127.185222 35.730556 524.000000 
 127.185333 35.730556 532.000000 127.185333 35.730556 527.000000 
 127.185444 35.730556 533.000000 127.185444 35.730556 529.000000 
 127.185556 35.730556 532.000000 127.185556 35.730556 530.000000 
 127.185778 35.730556 529.000000 127.185778 35.730556 526.000000 
 127.186000 35.730556 525.000000 127.186000 35.730556 521.000000 
 127.186111 35.730556 521.000000 127.186111 35.730556 517.000000 
 127.186222 35.730556 514.000000 127.186222 35.730556 512.000000 
 127.186333 35.730556 507.000000 127.186333 35.730556 506.000000 
 127.185222 35.730667 527.000000 127.185222 35.730667 520.000000 
 127.185333 35.730667 529.000000 127.185333 35.730667 523.000000 
 127.185444 35.730667 530.000000 127.185444 35.730667 525.000000 
 127.185556 35.730667 528.000000 127.185556 35.730667 524.000000 
 127.185778 35.730667 524.000000 127.185778 35.730667 518.000000 
 127.186000 35.730667 517.000000 127.186000 35.730667 510.000000 
 127.186111 35.730667 512.000000 127.186111 35.730667 505.000000 
 127.186222 35.730667 506.000000 127.186222 35.730667 501.000000 
 127.186333 35.730667 500.000000 127.186333 35.730667 497.000000 
 127.185333 35.730667 529.000000 127.185333 35.730667 523.000000 
 127.185444 35.730667 530.000000 127.185444 35.730667 525.000000 
 127.185556 35.730667 528.000000 127.185556 35.730667 524.000000 
 127.185667 35.730667 526.000000 127.185667 35.730667 521.000000 
 127.185889 35.730667 521.000000 127.185889 35.730667 514.000000 
 127.186111 35.730667 512.000000 127.186111 35.730667 505.000000 
 127.186222 35.730667 506.000000 127.186222 35.730667 501.000000 
 127.186333 35.730667 500.000000 127.186333 35.730667 497.000000 
 127.186444 35.730667 496.000000 127.186444 35.730667 493.000000 
 127.185333 35.730778 525.000000 127.185333 35.730778 520.000000 
 127.185444 35.730778 524.000000 127.185444 35.730778 521.000000 
 127.185556 35.730778 521.000000 127.185556 35.730778 519.000000 
 127.185667 35.730778 518.000000 127.185667 35.730778 516.000000 
 127.185889 35.730778 510.000000 127.185889 35.730778 507.000000 
 127.186111 35.730778 501.000000 127.186111 35.730778 499.000000 
 127.186222 35.730778 497.000000 127.186222 35.730778 496.000000 
 127.186333 35.730778 493.000000 127.186333 35.730778 492.000000 
 127.186444 35.730778 490.000000 127.186444 35.730778 489.000000 
 127.185333 35.730889 521.000000 127.185333 35.730889 516.000000 
 127.185444 35.730889 519.000000 127.185444 35.730889 516.000000 
 127.185556 35.730889 516.000000 127.185556 35.730889 513.000000 
 127.185667 35.730889 512.000000 127.185667 35.730889 509.000000 
 127.185889 35.730889 503.000000 127.185889 35.730889 498.000000 
 127.186111 35.730889 496.000000 127.186111 35.730889 492.000000 
 127.186222 35.730889 492.000000 127.186222 35.730889 489.000000 
 127.186333 35.730889 489.000000 127.186333 35.730889 486.000000 
 127.186444 35.730889 486.000000 127.186444 35.730889 483.000000 
 127.185444 35.730889 519.000000 127.185444 35.730889 516.000000 
 127.185556 35.730889 516.000000 127.185556 35.730889 513.000000 
 127.185667 35.730889 512.000000 127.185667 35.730889 509.000000 
 127.185778 35.730889 507.000000 127.185778 35.730889 504.000000 
 127.186000 35.730889 499.000000 127.186000 35.730889 495.000000 
 127.186222 35.730889 492.000000 127.186222 35.730889 489.000000 
 127.186333 35.730889 489.000000 127.186333 35.730889 486.000000 
 127.186444 35.730889 486.000000 127.186444 35.730889 483.000000 
 127.186556 35.730889 484.000000 127.186556 35.730889 480.000000 
 127.185444 35.731000 513.000000 127.185444 35.731000 512.000000 
 127.185556 35.731000 509.000000 127.185556 35.731000 510.000000 
 127.185667 35.731000 504.000000 127.185667 35.731000 505.000000 
 127.185778 35.731000 498.000000 127.185778 35.731000 500.000000 
 127.186000 35.731000 492.000000 127.186000 35.731000 491.000000 
 127.186222 35.731000 486.000000 127.186222 35.731000 484.000000 
 127.186333 35.731000 483.000000 127.186333 35.731000 481.000000 
 127.186444 35.731000 480.000000 127.186444 35.731000 478.000000 
 127.186556 35.731000 480.000000 127.186556 35.731000 476.000000 
 127.185444 35.731111 510.000000 127.185444 35.731111 507.000000 
 127.185556 35.731111 505.000000 127.185556 35.731111 505.000000 
 127.185667 35.731111 500.000000 127.185667 35.731111 501.000000 
 127.185778 35.731111 495.000000 127.185778 35.731111 494.000000 
 127.186000 35.731111 487.000000 127.186000 35.731111 484.000000 
 127.186222 35.731111 481.000000 127.186222 35.731111 477.000000 
 127.186333 35.731111 478.000000 127.186333 35.731111 474.000000 
 127.186444 35.731111 476.000000 127.186444 35.731111 472.000000 
 127.186556 35.731111 476.000000 127.186556 35.731111 471.000000 
 127.185556 35.731111 505.000000 127.185556 35.731111 505.000000 
 127.185667 35.731111 500.000000 127.185667 35.731111 501.000000 
 127.185778 35.731111 495.000000 127.185778 35.731111 494.000000 
 127.185889 35.731111 491.000000 127.185889 35.731111 489.000000 
 127.186111 35.731111 484.000000 127.186111 35.731111 480.000000 
 127.186333 35.731111 478.000000 127.186333 35.731111 474.000000 
 127.186444 35.731111 476.000000 127.186444 35.731111 472.000000 
 127.186556 35.731111 476.000000 127.186556 35.731111 471.000000 
 127.186667 35.731111 481.000000 127.186667 35.731111 473.000000 
 127.185556 35.731222 501.000000 127.185556 35.731222 501.000000 
 127.185667 35.731222 494.000000 127.185667 35.731222 497.000000 
 127.185778 35.731222 489.000000 127.185778 35.731222 490.000000 
 127.185889 35.731222 484.000000 127.185889 35.731222 484.000000 
 127.186111 35.731222 477.000000 127.186111 35.731222 475.000000 
 127.186333 35.731222 472.000000 127.186333 35.731222 471.000000 
 127.186444 35.731222 471.000000 127.186444 35.731222 469.000000 
 127.186556 35.731222 473.000000 127.186556 35.731222 469.000000 
 127.186667 35.731222 478.000000 127.186667 35.731222 472.000000 
 127.185556 35.731333 497.000000 127.185556 35.731333 493.000000 
 127.185667 35.731333 490.000000 127.185667 35.731333 487.000000 
 127.185778 35.731333 484.000000 127.185778 35.731333 481.000000 
 127.185889 35.731333 480.000000 127.185889 35.731333 475.000000 
 127.186111 35.731333 473.000000 127.186111 35.731333 470.000000 
 127.186333 35.731333 469.000000 127.186333 35.731333 465.000000 
 127.186444 35.731333 469.000000 127.186444 35.731333 464.000000 
 127.186556 35.731333 472.000000 127.186556 35.731333 465.000000 
 127.186667 35.731333 476.000000 127.186667 35.731333 470.000000 
 127.185667 35.731333 490.000000 127.185667 35.731333 487.000000 
 127.185778 35.731333 484.000000 127.185778 35.731333 481.000000 
 127.185889 35.731333 480.000000 127.185889 35.731333 475.000000 
 127.186000 35.731333 475.000000 127.186000 35.731333 472.000000 
 127.186222 35.731333 471.000000 127.186222 35.731333 468.000000 
 127.186444 35.731333 469.000000 127.186444 35.731333 464.000000 
 127.186556 35.731333 472.000000 127.186556 35.731333 465.000000 
 127.186667 35.731333 476.000000 127.186667 35.731333 470.000000 
 127.186778 35.731333 483.000000 127.186778 35.731333 474.000000 
 127.185667 35.731444 481.000000 127.185667 35.731444 481.000000 
 127.185778 35.731444 475.000000 127.185778 35.731444 474.000000 
 127.185889 35.731444 472.000000 127.185889 35.731444 471.000000 
 127.186000 35.731444 470.000000 127.186000 35.731444 469.000000 
 127.186222 35.731444 465.000000 127.186222 35.731444 464.000000 
 127.186444 35.731444 465.000000 127.186444 35.731444 461.000000 
 127.186556 35.731444 470.000000 127.186556 35.731444 463.000000 
 127.186667 35.731444 474.000000 127.186667 35.731444 469.000000 
 127.186778 35.731444 481.000000 127.186778 35.731444 474.000000 
 127.185667 35.731556 474.000000 127.185667 35.731556 476.000000 
 127.185778 35.731556 471.000000 127.185778 35.731556 472.000000 
 127.185889 35.731556 469.000000 127.185889 35.731556 468.000000 
 127.186000 35.731556 466.000000 127.186000 35.731556 465.000000 
 127.186222 35.731556 462.000000 127.186222 35.731556 460.000000 
 127.186444 35.731556 463.000000 127.186444 35.731556 459.000000 
 127.186556 35.731556 469.000000 127.186556 35.731556 462.000000 
 127.186667 35.731556 474.000000 127.186667 35.731556 467.000000 
 127.186778 35.731556 480.000000 127.186778 35.731556 472.000000 
 127.185667 35.731667 472.000000 127.185667 35.731667 470.000000 
 127.185778 35.731667 468.000000 127.185778 35.731667 467.000000 
 127.185889 35.731667 465.000000 127.185889 35.731667 463.000000 
 127.186000 35.731667 463.000000 127.186000 35.731667 461.000000 
 127.186222 35.731667 459.000000 127.186222 35.731667 455.000000 
 127.186444 35.731667 462.000000 127.186444 35.731667 456.000000 
 127.186556 35.731667 467.000000 127.186556 35.731667 461.000000 
 127.186667 35.731667 472.000000 127.186667 35.731667 466.000000 
 127.186778 35.731667 478.000000 127.186778 35.731667 472.000000 
 127.185778 35.731667 468.000000 127.185778 35.731667 467.000000 
 127.185889 35.731667 465.000000 127.185889 35.731667 463.000000 
 127.186000 35.731667 463.000000 127.186000 35.731667 461.000000 
 127.186111 35.731667 460.000000 127.186111 35.731667 458.000000 
 127.186333 35.731667 459.000000 127.186333 35.731667 454.000000 
 127.186556 35.731667 467.000000 127.186556 35.731667 461.000000 
 127.186667 35.731667 472.000000 127.186667 35.731667 466.000000 
 127.186778 35.731667 478.000000 127.186778 35.731667 472.000000 
 127.186889 35.731667 484.000000 127.186889 35.731667 477.000000 
 127.185778 35.731778 463.000000 127.185778 35.731778 463.000000 
 127.185889 35.731778 461.000000 127.185889 35.731778 460.000000 
 127.186000 35.731778 458.000000 127.186000 35.731778 457.000000 
 127.186111 35.731778 455.000000 127.186111 35.731778 454.000000 
 127.186333 35.731778 456.000000 127.186333 35.731778 450.000000 
 127.186556 35.731778 466.000000 127.186556 35.731778 460.000000 
 127.186667 35.731778 472.000000 127.186667 35.731778 466.000000 
 127.186778 35.731778 477.000000 127.186778 35.731778 471.000000 
 127.186889 35.731778 482.000000 127.186889 35.731778 476.000000 
 127.185778 35.731889 460.000000 127.185778 35.731889 458.000000 
 127.185889 35.731889 457.000000 127.185889 35.731889 455.000000 
 127.186000 35.731889 454.000000 127.186000 35.731889 452.000000 
 127.186111 35.731889 451.000000 127.186111 35.731889 449.000000 
 127.186333 35.731889 455.000000 127.186333 35.731889 448.000000 
 127.186556 35.731889 466.000000 127.186556 35.731889 459.000000 
 127.186667 35.731889 471.000000 127.186667 35.731889 465.000000 
 127.186778 35.731889 476.000000 127.186778 35.731889 471.000000 
 127.186889 35.731889 482.000000 127.186889 35.731889 477.000000 
 127.185889 35.731889 457.000000 127.185889 35.731889 455.000000 
 127.186000 35.731889 454.000000 127.186000 35.731889 452.000000 
 127.186111 35.731889 451.000000 127.186111 35.731889 449.000000 
 127.186222 35.731889 450.000000 127.186222 35.731889 447.000000 
 127.186444 35.731889 460.000000 127.186444 35.731889 453.000000 
 127.186667 35.731889 471.000000 127.186667 35.731889 465.000000 
 127.186778 35.731889 476.000000 127.186778 35.731889 471.000000 
 127.186889 35.731889 482.000000 127.186889 35.731889 477.000000 
 127.187000 35.731889 487.000000 127.187000 35.731889 482.000000 
 127.185889 35.732000 452.000000 127.185889 35.732000 451.000000 
 127.186000 35.732000 449.000000 127.186000 35.732000 449.000000 
 127.186111 35.732000 447.000000 127.186111 35.732000 446.000000 
 127.186222 35.732000 448.000000 127.186222 35.732000 445.000000 
 127.186444 35.732000 459.000000 127.186444 35.732000 452.000000 
 127.186667 35.732000 471.000000 127.186667 35.732000 465.000000 
 127.186778 35.732000 477.000000 127.186778 35.732000 472.000000 
 127.186889 35.732000 482.000000 127.186889 35.732000 478.000000 
 127.187000 35.732000 487.000000 127.187000 35.732000 482.000000 
 127.185889 35.732111 449.000000 127.185889 35.732111 447.000000 
 127.186000 35.732111 446.000000 127.186000 35.732111 444.000000 
 127.186111 35.732111 445.000000 127.186111 35.732111 443.000000 
 127.186222 35.732111 446.000000 127.186222 35.732111 442.000000 
 127.186444 35.732111 458.000000 127.186444 35.732111 450.000000 
 127.186667 35.732111 472.000000 127.186667 35.732111 464.000000 
 127.186778 35.732111 478.000000 127.186778 35.732111 471.000000 
 127.186889 35.732111 482.000000 127.186889 35.732111 477.000000 
 127.187000 35.732111 487.000000 127.187000 35.732111 481.000000 
 127.186000 35.732111 446.000000 127.186000 35.732111 444.000000 
 127.186111 35.732111 445.000000 127.186111 35.732111 443.000000 
 127.186222 35.732111 446.000000 127.186222 35.732111 442.000000 
 127.186333 35.732111 452.000000 127.186333 35.732111 445.000000 
 127.186556 35.732111 465.000000 127.186556 35.732111 457.000000 
 127.186778 35.732111 478.000000 127.186778 35.732111 471.000000 
 127.186889 35.732111 482.000000 127.186889 35.732111 477.000000 
 127.187000 35.732111 487.000000 127.187000 35.732111 481.000000 
 127.187111 35.732111 492.000000 127.187111 35.732111 486.000000 
 127.186000 35.732222 443.000000 127.186000 35.732222 442.000000 
 127.186111 35.732222 442.000000 127.186111 35.732222 440.000000 
 127.186222 35.732222 445.000000 127.186222 35.732222 440.000000 
 127.186333 35.732222 450.000000 127.186333 35.732222 444.000000 
 127.186556 35.732222 464.000000 127.186556 35.732222 455.000000 
 127.186778 35.732222 477.000000 127.186778 35.732222 469.000000 
 127.186889 35.732222 481.000000 127.186889 35.732222 475.000000 
 127.187000 35.732222 486.000000 127.187000 35.732222 479.000000 
 127.187111 35.732222 490.000000 127.187111 35.732222 484.000000 
 127.186000 35.732333 440.000000 127.186000 35.732333 438.000000 
 127.186111 35.732333 440.000000 127.186111 35.732333 436.000000 
 127.186222 35.732333 444.000000 127.186222 35.732333 437.000000 
 127.186333 35.732333 449.000000 127.186333 35.732333 442.000000 
 127.186556 35.732333 462.000000 127.186556 35.732333 453.000000 
 127.186778 35.732333 475.000000 127.186778 35.732333 465.000000 
 127.186889 35.732333 479.000000 127.186889 35.732333 471.000000 
 127.187000 35.732333 484.000000 127.187000 35.732333 476.000000 
 127.187111 35.732333 488.000000 127.187111 35.732333 480.000000 
 127.186111 35.732333 440.000000 127.186111 35.732333 436.000000 
 127.186222 35.732333 444.000000 127.186222 35.732333 437.000000 
 127.186333 35.732333 449.000000 127.186333 35.732333 442.000000 
 127.186444 35.732333 455.000000 127.186444 35.732333 447.000000 
 127.186667 35.732333 469.000000 127.186667 35.732333 459.000000 
 127.186889 35.732333 479.000000 127.186889 35.732333 471.000000 
 127.187000 35.732333 484.000000 127.187000 35.732333 476.000000 
 127.187111 35.732333 488.000000 127.187111 35.732333 480.000000 
 127.187222 35.732333 492.000000 127.187222 35.732333 484.000000 
 127.186111 35.732444 437.000000 127.186111 35.732444 434.000000 
 127.186222 35.732444 442.000000 127.186222 35.732444 436.000000 
 127.186333 35.732444 447.000000 127.186333 35.732444 441.000000 
 127.186444 35.732444 453.000000 127.186444 35.732444 446.000000 
 127.186667 35.732444 465.000000 127.186667 35.732444 456.000000 
 127.186889 35.732444 476.000000 127.186889 35.732444 467.000000 
 127.187000 35.732444 480.000000 127.187000 35.732444 473.000000 
 127.187111 35.732444 484.000000 127.187111 35.732444 477.000000 
 127.187222 35.732444 488.000000 127.187222 35.732444 481.000000 
 127.186111 35.732556 436.000000 127.186111 35.732556 430.000000 
 127.186222 35.732556 441.000000 127.186222 35.732556 433.000000 
 127.186333 35.732556 446.000000 127.186333 35.732556 438.000000 
 127.186444 35.732556 451.000000 127.186444 35.732556 443.000000 
 127.186667 35.732556 461.000000 127.186667 35.732556 451.000000 
 127.186889 35.732556 473.000000 127.186889 35.732556 461.000000 
 127.187000 35.732556 477.000000 127.187000 35.732556 467.000000 
 127.187111 35.732556 481.000000 127.187111 35.732556 473.000000 
 127.187222 35.732556 485.000000 127.187222 35.732556 477.000000 
 127.186222 35.732556 441.000000 127.186222 35.732556 433.000000 
 127.186333 35.732556 446.000000 127.186333 35.732556 438.000000 
 127.186444 35.732556 451.000000 127.186444 35.732556 443.000000 
 127.186556 35.732556 456.000000 127.186556 35.732556 447.000000 
 127.186778 35.732556 467.000000 127.186778 35.732556 456.000000 
 127.187000 35.732556 477.000000 127.187000 35.732556 467.000000 
 127.187111 35.732556 481.000000 127.187111 35.732556 473.000000 
 127.187222 35.732556 485.000000 127.187222 35.732556 477.000000 
 127.187333 35.732556 489.000000 127.187333 35.732556 481.000000 
 127.186222 35.732667 438.000000 127.186222 35.732667 432.000000 
 127.186333 35.732667 443.000000 127.186333 35.732667 437.000000 
 127.186444 35.732667 447.000000 127.186444 35.732667 441.000000 
 127.186556 35.732667 451.000000 127.186556 35.732667 444.000000 
 127.186778 35.732667 461.000000 127.186778 35.732667 452.000000 
 127.187000 35.732667 473.000000 127.187000 35.732667 463.000000 
 127.187111 35.732667 477.000000 127.187111 35.732667 469.000000 
 127.187222 35.732667 481.000000 127.187222 35.732667 474.000000 
 127.187333 35.732667 485.000000 127.187333 35.732667 478.000000 
 127.186222 35.732778 437.000000 127.186222 35.732778 431.000000 
 127.186333 35.732778 441.000000 127.186333 35.732778 435.000000 
 127.186444 35.732778 444.000000 127.186444 35.732778 439.000000 
 127.186556 35.732778 448.000000 127.186556 35.732778 442.000000 
 127.186778 35.732778 458.000000 127.186778 35.732778 448.000000 
 127.187000 35.732778 469.000000 127.187000 35.732778 459.000000 
 127.187111 35.732778 474.000000 127.187111 35.732778 464.000000 
 127.187222 35.732778 478.000000 127.187222 35.732778 469.000000 
 127.187333 35.732778 481.000000 127.187333 35.732778 474.000000 
 127.186333 35.732889 439.000000 127.186333 35.732889 434.000000 
 127.186444 35.732889 442.000000 127.186444 35.732889 437.000000 
 127.186556 35.732889 445.000000 127.186556 35.732889 441.000000 
 127.186667 35.732889 448.000000 127.186667 35.732889 444.000000 
 127.186889 35.732889 459.000000 127.186889 35.732889 451.000000 
 127.187111 35.732889 469.000000 127.187111 35.732889 462.000000 
 127.187222 35.732889 474.000000 127.187222 35.732889 467.000000 
 127.187333 35.732889 477.000000 127.187333 35.732889 471.000000 
 127.187444 35.732889 481.000000 127.187444 35.732889 475.000000 
 127.186333 35.733000 437.000000 127.186333 35.733000 435.000000 
 127.186444 35.733000 441.000000 127.186444 35.733000 439.000000 
 127.186556 35.733000 444.000000 127.186556 35.733000 442.000000 
 127.186667 35.733000 447.000000 127.186667 35.733000 446.000000 
 127.186889 35.733000 457.000000 127.186889 35.733000 454.000000 
 127.187111 35.733000 467.000000 127.187111 35.733000 461.000000 
 127.187222 35.733000 471.000000 127.187222 35.733000 465.000000 
 127.187333 35.733000 475.000000 127.187333 35.733000 469.000000 
 127.187444 35.733000 478.000000 127.187444 35.733000 473.000000 
 127.186333 35.733111 439.000000 127.186333 35.733111 437.000000 
 127.186444 35.733111 442.000000 127.186444 35.733111 440.000000 
 127.186556 35.733111 446.000000 127.186556 35.733111 444.000000 
 127.186667 35.733111 449.000000 127.186667 35.733111 447.000000 
 127.186889 35.733111 458.000000 127.186889 35.733111 455.000000 
 127.187111 35.733111 465.000000 127.187111 35.733111 463.000000 
 127.187222 35.733111 469.000000 127.187222 35.733111 467.000000 
 127.187333 35.733111 473.000000 127.187333 35.733111 471.000000 
 127.187444 35.733111 476.000000 127.187444 35.733111 474.000000 
 127.186444 35.733111 442.000000 127.186444 35.733111 440.000000 
 127.186556 35.733111 446.000000 127.186556 35.733111 444.000000 
 127.186667 35.733111 449.000000 127.186667 35.733111 447.000000 
 127.186778 35.733111 454.000000 127.186778 35.733111 450.000000 
 127.187000 35.733111 461.000000 127.187000 35.733111 459.000000 
 127.187222 35.733111 469.000000 127.187222 35.733111 467.000000 
 127.187333 35.733111 473.000000 127.187333 35.733111 471.000000 
 127.187444 35.733111 476.000000 127.187444 35.733111 474.000000 
 127.187556 35.733111 480.000000 127.187556 35.733111 478.000000 
 127.186444 35.733222 444.000000 127.186444 35.733222 442.000000 
 127.186556 35.733222 447.000000 127.186556 35.733222 445.000000 
 127.186667 35.733222 450.000000 127.186667 35.733222 449.000000 
 127.186778 35.733222 455.000000 127.186778 35.733222 453.000000 
 127.187000 35.733222 463.000000 127.187000 35.733222 462.000000 
 127.187222 35.733222 471.000000 127.187222 35.733222 471.000000 
 127.187333 35.733222 474.000000 127.187333 35.733222 475.000000 
 127.187444 35.733222 478.000000 127.187444 35.733222 478.000000 
 127.187556 35.733222 481.000000 127.187556 35.733222 482.000000 
 127.186444 35.733333 445.000000 127.186444 35.733333 444.000000 
 127.186556 35.733333 449.000000 127.186556 35.733333 447.000000 
 127.186667 35.733333 453.000000 127.186667 35.733333 451.000000 
 127.186778 35.733333 457.000000 127.186778 35.733333 456.000000 
 127.187000 35.733333 467.000000 127.187000 35.733333 465.000000 
 127.187222 35.733333 475.000000 127.187222 35.733333 474.000000 
 127.187333 35.733333 478.000000 127.187333 35.733333 477.000000 
 127.187444 35.733333 482.000000 127.187444 35.733333 480.000000 
 127.187556 35.733333 486.000000 127.187556 35.733333 485.000000 
 127.186556 35.733333 449.000000 127.186556 35.733333 447.000000 
 127.186667 35.733333 453.000000 127.186667 35.733333 451.000000 
 127.186778 35.733333 457.000000 127.186778 35.733333 456.000000 
 127.186889 35.733333 462.000000 127.186889 35.733333 460.000000 
 127.187111 35.733333 471.000000 127.187111 35.733333 469.000000 
 127.187333 35.733333 478.000000 127.187333 35.733333 477.000000 
 127.187444 35.733333 482.000000 127.187444 35.733333 480.000000 
 127.187556 35.733333 486.000000 127.187556 35.733333 485.000000 
 127.187667 35.733333 489.000000 127.187667 35.733333 489.000000 
 127.186556 35.733444 451.000000 127.186556 35.733444 449.000000 
 127.186667 35.733444 456.000000 127.186667 35.733444 453.000000 
 127.186778 35.733444 460.000000 127.186778 35.733444 458.000000 
 127.186889 35.733444 465.000000 127.186889 35.733444 462.000000 
 127.187111 35.733444 474.000000 127.187111 35.733444 472.000000 
 127.187333 35.733444 480.000000 127.187333 35.733444 479.000000 
 127.187444 35.733444 485.000000 127.187444 35.733444 484.000000 
 127.187556 35.733444 489.000000 127.187556 35.733444 488.000000 
 127.187667 35.733444 492.000000 127.187667 35.733444 492.000000 
 127.186556 35.733556 453.000000 127.186556 35.733556 452.000000 
 127.186667 35.733556 458.000000 127.186667 35.733556 456.000000 
 127.186778 35.733556 462.000000 127.186778 35.733556 460.000000 
 127.186889 35.733556 467.000000 127.186889 35.733556 464.000000 
 127.187111 35.733556 476.000000 127.187111 35.733556 474.000000 
 127.187333 35.733556 484.000000 127.187333 35.733556 483.000000 
 127.187444 35.733556 488.000000 127.187444 35.733556 488.000000 
 127.187556 35.733556 492.000000 127.187556 35.733556 493.000000 
 127.187667 35.733556 495.000000 127.187667 35.733556 497.000000 
 127.186667 35.733556 458.000000 127.186667 35.733556 456.000000 
 127.186778 35.733556 462.000000 127.186778 35.733556 460.000000 
 127.186889 35.733556 467.000000 127.186889 35.733556 464.000000 
 127.187000 35.733556 472.000000 127.187000 35.733556 469.000000 
 127.187222 35.733556 479.000000 127.187222 35.733556 478.000000 
 127.187444 35.733556 488.000000 127.187444 35.733556 488.000000 
 127.187556 35.733556 492.000000 127.187556 35.733556 493.000000 
 127.187667 35.733556 495.000000 127.187667 35.733556 497.000000 
 127.187778 35.733556 499.000000 127.187778 35.733556 502.000000 
 127.186667 35.733667 460.000000 127.186667 35.733667 459.000000 
 127.186778 35.733667 464.000000 127.186778 35.733667 462.000000 
 127.186889 35.733667 469.000000 127.186889 35.733667 465.000000 
 127.187000 35.733667 474.000000 127.187000 35.733667 469.000000 
 127.187222 35.733667 483.000000 127.187222 35.733667 478.000000 
 127.187444 35.733667 493.000000 127.187444 35.733667 490.000000 
 127.187556 35.733667 497.000000 127.187556 35.733667 495.000000 
 127.187667 35.733667 502.000000 127.187667 35.733667 501.000000 
 127.187778 35.733667 505.000000 127.187778 35.733667 506.000000 
 127.186667 35.733778 462.000000 127.186667 35.733778 466.000000 
 127.186778 35.733778 465.000000 127.186778 35.733778 469.000000 
 127.186889 35.733778 469.000000 127.186889 35.733778 471.000000 
 127.187000 35.733778 473.000000 127.187000 35.733778 472.000000 
 127.187222 35.733778 484.000000 127.187222 35.733778 480.000000 
 127.187444 35.733778 495.000000 127.187444 35.733778 492.000000 
 127.187556 35.733778 501.000000 127.187556 35.733778 498.000000 
 127.187667 35.733778 506.000000 127.187667 35.733778 504.000000 
 127.187778 35.733778 508.000000 127.187778 35.733778 508.000000 
 127.186778 35.733778 465.000000 127.186778 35.733778 469.000000 
 127.186889 35.733778 469.000000 127.186889 35.733778 471.000000 
 127.187000 35.733778 473.000000 127.187000 35.733778 472.000000 
 127.187111 35.733778 478.000000 127.187111 35.733778 475.000000 
 127.187333 35.733778 490.000000 127.187333 35.733778 486.000000 
 127.187556 35.733778 501.000000 127.187556 35.733778 498.000000 
 127.187667 35.733778 506.000000 127.187667 35.733778 504.000000 
 127.187778 35.733778 508.000000 127.187778 35.733778 508.000000 
 127.187889 35.733778 506.000000 127.187889 35.733778 511.000000 
 127.186778 35.733889 471.000000 127.186778 35.733889 475.000000 
 127.186889 35.733889 472.000000 127.186889 35.733889 476.000000 
 127.187000 35.733889 475.000000 127.187000 35.733889 477.000000 
 127.187111 35.733889 480.000000 127.187111 35.733889 479.000000 
 127.187333 35.733889 492.000000 127.187333 35.733889 488.000000 
 127.187556 35.733889 504.000000 127.187556 35.733889 499.000000 
 127.187667 35.733889 508.000000 127.187667 35.733889 505.000000 
 127.187778 35.733889 511.000000 127.187778 35.733889 508.000000 
 127.187889 35.733889 503.000000 127.187889 35.733889 510.000000 
 127.186778 35.734000 476.000000 127.186778 35.734000 480.000000 
 127.186889 35.734000 477.000000 127.186889 35.734000 483.000000 
 127.187000 35.734000 479.000000 127.187000 35.734000 485.000000 
 127.187111 35.734000 483.000000 127.187111 35.734000 486.000000 
 127.187333 35.734000 493.000000 127.187333 35.734000 490.000000 
 127.187556 35.734000 505.000000 127.187556 35.734000 500.000000 
 127.187667 35.734000 508.000000 127.187667 35.734000 505.000000 
 127.187778 35.734000 510.000000 127.187778 35.734000 505.000000 
 127.187889 35.734000 501.000000 127.187889 35.734000 502.000000 
 127.186889 35.734000 477.000000 127.186889 35.734000 483.000000 
 127.187000 35.734000 479.000000 127.187000 35.734000 485.000000 
 127.187111 35.734000 483.000000 127.187111 35.734000 486.000000 
 127.187222 35.734000 488.000000 127.187222 35.734000 487.000000 
 127.187444 35.734000 499.000000 127.187444 35.734000 495.000000 
 127.187667 35.734000 508.000000 127.187667 35.734000 505.000000 
 127.187778 35.734000 510.000000 127.187778 35.734000 505.000000 
 127.187889 35.734000 501.000000 127.187889 35.734000 502.000000 
 127.188000 35.734000 492.000000 127.188000 35.734000 495.000000 
 127.186889 35.734111 485.000000 127.186889 35.734111 487.000000 
 127.187000 35.734111 486.000000 127.187000 35.734111 490.000000 
 127.187111 35.734111 487.000000 127.187111 35.734111 491.000000 
 127.187222 35.734111 490.000000 127.187222 35.734111 491.000000 
 127.187444 35.734111 500.000000 127.187444 35.734111 496.000000 
 127.187667 35.734111 505.000000 127.187667 35.734111 505.000000 
 127.187778 35.734111 502.000000 127.187778 35.734111 505.000000 
 127.187889 35.734111 495.000000 127.187889 35.734111 497.000000 
 127.188000 35.734111 489.000000 127.188000 35.734111 490.000000 
 127.186889 35.734222 490.000000 127.186889 35.734222 493.000000 
 127.187000 35.734222 491.000000 127.187000 35.734222 497.000000 
 127.187111 35.734222 491.000000 127.187111 35.734222 498.000000 
 127.187222 35.734222 493.000000 127.187222 35.734222 498.000000 
 127.187444 35.734222 501.000000 127.187444 35.734222 501.000000 
 127.187667 35.734222 505.000000 127.187667 35.734222 505.000000 
 127.187778 35.734222 497.000000 127.187778 35.734222 499.000000 
 127.187889 35.734222 490.000000 127.187889 35.734222 490.000000 
 127.188000 35.734222 484.000000 127.188000 35.734222 481.000000 
 127.187000 35.734222 491.000000 127.187000 35.734222 497.000000 
 127.187111 35.734222 491.000000 127.187111 35.734222 498.000000 
 127.187222 35.734222 493.000000 127.187222 35.734222 498.000000 
 127.187333 35.734222 496.000000 127.187333 35.734222 499.000000 
 127.187556 35.734222 505.000000 127.187556 35.734222 505.000000 
 127.187778 35.734222 497.000000 127.187778 35.734222 499.000000 
 127.187889 35.734222 490.000000 127.187889 35.734222 490.000000 
 127.188000 35.734222 484.000000 127.188000 35.734222 481.000000 
 127.188111 35.734222 478.000000 127.188111 35.734222 474.000000 
 127.187000 35.734333 498.000000 127.187000 35.734333 501.000000 
 127.187111 35.734333 498.000000 127.187111 35.734333 502.000000 
 127.187222 35.734333 499.000000 127.187222 35.734333 503.000000 
 127.187333 35.734333 501.000000 127.187333 35.734333 503.000000 
 127.187556 35.734333 505.000000 127.187556 35.734333 505.000000 
 127.187778 35.734333 490.000000 127.187778 35.734333 497.000000 
 127.187889 35.734333 481.000000 127.187889 35.734333 486.000000 
 127.188000 35.734333 474.000000 127.188000 35.734333 475.000000 
 127.188111 35.734333 468.000000 127.188111 35.734333 468.000000 
 127.187000 35.734444 502.000000 127.187000 35.734444 505.000000 
 127.187111 35.734444 503.000000 127.187111 35.734444 508.000000 
 127.187222 35.734444 503.000000 127.187222 35.734444 509.000000 
 127.187333 35.734444 504.000000 127.187333 35.734444 509.000000 
 127.187556 35.734444 505.000000 127.187556 35.734444 510.000000 
 127.187778 35.734444 486.000000 127.187778 35.734444 496.000000 
 127.187889 35.734444 475.000000 127.187889 35.734444 486.000000 
 127.188000 35.734444 468.000000 127.188000 35.734444 476.000000 
 127.188111 35.734444 461.000000 127.188111 35.734444 468.000000 
 127.187000 35.734556 508.000000 127.187000 35.734556 509.000000 
 127.187111 35.734556 509.000000 127.187111 35.734556 514.000000 
 127.187222 35.734556 509.000000 127.187222 35.734556 514.000000 
 127.187333 35.734556 510.000000 127.187333 35.734556 514.000000 
 127.187556 35.734556 505.000000 127.187556 35.734556 513.000000 
 127.187778 35.734556 486.000000 127.187778 35.734556 497.000000 
 127.187889 35.734556 476.000000 127.187889 35.734556 487.000000 
 127.188000 35.734556 468.000000 127.188000 35.734556 478.000000 
 127.188111 35.734556 460.000000 127.188111 35.734556 470.000000 
 127.187111 35.734556 509.000000 127.187111 35.734556 514.000000 
 127.187222 35.734556 509.000000 127.187222 35.734556 514.000000 
 127.187333 35.734556 510.000000 127.187333 35.734556 514.000000 
 127.187444 35.734556 510.000000 127.187444 35.734556 514.000000 
 127.187667 35.734556 496.000000 127.187667 35.734556 505.000000 
 127.187889 35.734556 476.000000 127.187889 35.734556 487.000000 
 127.188000 35.734556 468.000000 127.188000 35.734556 478.000000 
 127.188111 35.734556 460.000000 127.188111 35.734556 470.000000 
 127.188222 35.734556 452.000000 127.188222 35.734556 462.000000 
 127.187111 35.734667 514.000000 127.187111 35.734667 519.000000 
 127.187222 35.734667 514.000000 127.187222 35.734667 521.000000 
 127.187333 35.734667 514.000000 127.187333 35.734667 520.000000 
 127.187444 35.734667 513.000000 127.187444 35.734667 519.000000 
 127.187667 35.734667 497.000000 127.187667 35.734667 506.000000 
 127.187889 35.734667 478.000000 127.187889 35.734667 488.000000 
 127.188000 35.734667 470.000000 127.188000 35.734667 479.000000 
 127.188111 35.734667 462.000000 127.188111 35.734667 471.000000 
 127.188222 35.734667 454.000000 127.188222 35.734667 464.000000 
 127.187111 35.734778 521.000000 127.187111 35.734778 523.000000 
 127.187222 35.734778 520.000000 127.187222 35.734778 525.000000 
 127.187333 35.734778 519.000000 127.187333 35.734778 524.000000 
 127.187444 35.734778 517.000000 127.187444 35.734778 521.000000 
 127.187667 35.734778 497.000000 127.187667 35.734778 504.000000 
 127.187889 35.734778 479.000000 127.187889 35.734778 485.000000 
 127.188000 35.734778 471.000000 127.188000 35.734778 477.000000 
 127.188111 35.734778 464.000000 127.188111 35.734778 468.000000 
 127.188222 35.734778 456.000000 127.188222 35.734778 460.000000 
 127.187222 35.734778 520.000000 127.187222 35.734778 525.000000 
 127.187333 35.734778 519.000000 127.187333 35.734778 524.000000 
 127.187444 35.734778 517.000000 127.187444 35.734778 521.000000 
 127.187556 35.734778 506.000000 127.187556 35.734778 515.000000 
 127.187778 35.734778 488.000000 127.187778 35.734778 494.000000 
 127.188000 35.734778 471.000000 127.188000 35.734778 477.000000 
 127.188111 35.734778 464.000000 127.188111 35.734778 468.000000 
 127.188222 35.734778 456.000000 127.188222 35.734778 460.000000 
 127.188333 35.734778 450.000000 127.188333 35.734778 454.000000 
 127.187222 35.734889 524.000000 127.187222 35.734889 525.000000 
 127.187333 35.734889 521.000000 127.187333 35.734889 525.000000 
 127.187444 35.734889 515.000000 127.187444 35.734889 517.000000 
 127.187556 35.734889 504.000000 127.187556 35.734889 508.000000 
 127.187778 35.734889 485.000000 127.187778 35.734889 487.000000 
 127.188000 35.734889 468.000000 127.188000 35.734889 468.000000 
 127.188111 35.734889 460.000000 127.188111 35.734889 459.000000 
 127.188222 35.734889 454.000000 127.188222 35.734889 451.000000 
 127.188333 35.734889 449.000000 127.188333 35.734889 445.000000 
 127.187222 35.735000 525.000000 127.187222 35.735000 528.000000 
 127.187333 35.735000 517.000000 127.187333 35.735000 523.000000 
 127.187444 35.735000 508.000000 127.187444 35.735000 512.000000 
 127.187556 35.735000 498.000000 127.187556 35.735000 502.000000 
 127.187778 35.735000 478.000000 127.187778 35.735000 480.000000 
 127.188000 35.735000 459.000000 127.188000 35.735000 461.000000 
 127.188111 35.735000 451.000000 127.188111 35.735000 452.000000 
 127.188222 35.735000 445.000000 127.188222 35.735000 444.000000 
 127.188333 35.735000 439.000000 127.188333 35.735000 436.000000 
 127.187333 35.735000 517.000000 127.187333 35.735000 523.000000 
 127.187444 35.735000 508.000000 127.187444 35.735000 512.000000 
 127.187556 35.735000 498.000000 127.187556 35.735000 502.000000 
 127.187667 35.735000 487.000000 127.187667 35.735000 490.000000 
 127.187889 35.735000 468.000000 127.187889 35.735000 471.000000 
 127.188111 35.735000 451.000000 127.188111 35.735000 452.000000 
 127.188222 35.735000 445.000000 127.188222 35.735000 444.000000 
 127.188333 35.735000 439.000000 127.188333 35.735000 436.000000 
 127.188444 35.735000 435.000000 127.188444 35.735000 430.000000 
 127.187333 35.735111 512.000000 127.187333 35.735111 517.000000 
 127.187444 35.735111 502.000000 127.187444 35.735111 506.000000 
 127.187556 35.735111 490.000000 127.187556 35.735111 494.000000 
 127.187667 35.735111 480.000000 127.187667 35.735111 482.000000 
 127.187889 35.735111 461.000000 127.187889 35.735111 462.000000 
 127.188111 35.735111 444.000000 127.188111 35.735111 444.000000 
 127.188222 35.735111 436.000000 127.188222 35.735111 435.000000 
 127.188333 35.735111 430.000000 127.188333 35.735111 427.000000 
 127.188444 35.735111 425.000000 127.188444 35.735111 420.000000 
 127.187333 35.735222 506.000000 127.187333 35.735222 507.000000 
 127.187444 35.735222 494.000000 127.187444 35.735222 494.000000 
 127.187556 35.735222 482.000000 127.187556 35.735222 478.000000 
 127.187667 35.735222 471.000000 127.187667 35.735222 466.000000 
 127.187889 35.735222 453.000000 127.187889 35.735222 448.000000 
 127.188111 35.735222 435.000000 127.188111 35.735222 433.000000 
 127.188222 35.735222 427.000000 127.188222 35.735222 423.000000 
 127.188333 35.735222 420.000000 127.188333 35.735222 416.000000 
 127.188444 35.735222 414.000000 127.188444 35.735222 408.000000 
 127.187444 35.735222 494.000000 127.187444 35.735222 494.000000 
 127.187556 35.735222 482.000000 127.187556 35.735222 478.000000 
 127.187667 35.735222 471.000000 127.187667 35.735222 466.000000 
 127.187778 35.735222 462.000000 127.187778 35.735222 456.000000 
 127.188000 35.735222 444.000000 127.188000 35.735222 440.000000 
 127.188222 35.735222 427.000000 127.188222 35.735222 423.000000 
 127.188333 35.735222 420.000000 127.188333 35.735222 416.000000 
 127.188444 35.735222 414.000000 127.188444 35.735222 408.000000 
 127.188556 35.735222 410.000000 127.188556 35.735222 399.000000 
 127.187444 35.735333 478.000000 127.187444 35.735333 484.000000 
 127.187556 35.735333 466.000000 127.187556 35.735333 469.000000 
 127.187667 35.735333 456.000000 127.187667 35.735333 456.000000 
 127.187778 35.735333 448.000000 127.187778 35.735333 446.000000 
 127.188000 35.735333 433.000000 127.188000 35.735333 434.000000 
 127.188222 35.735333 416.000000 127.188222 35.735333 419.000000 
 127.188333 35.735333 408.000000 127.188333 35.735333 411.000000 
 127.188444 35.735333 399.000000 127.188444 35.735333 403.000000 
 127.188556 35.735333 395.000000 127.188556 35.735333 396.000000 
 127.187444 35.735444 469.000000 127.187444 35.735444 473.000000 
 127.187556 35.735444 456.000000 127.187556 35.735444 460.000000 
 127.187667 35.735444 446.000000 127.187667 35.735444 448.000000 
 127.187778 35.735444 441.000000 127.187778 35.735444 440.000000 
 127.188000 35.735444 425.000000 127.188000 35.735444 426.000000 
 127.188222 35.735444 411.000000 127.188222 35.735444 413.000000 
 127.188333 35.735444 403.000000 127.188333 35.735444 406.000000 
 127.188444 35.735444 396.000000 127.188444 35.735444 398.000000 
 127.188556 35.735444 391.000000 127.188556 35.735444 392.000000 
 127.187556 35.735444 456.000000 127.187556 35.735444 460.000000 
 127.187667 35.735444 446.000000 127.187667 35.735444 448.000000 
 127.187778 35.735444 441.000000 127.187778 35.735444 440.000000 
 127.187889 35.735444 434.000000 127.187889 35.735444 433.000000 
 127.188111 35.735444 419.000000 127.188111 35.735444 419.000000 
 127.188333 35.735444 403.000000 127.188333 35.735444 406.000000 
 127.188444 35.735444 396.000000 127.188444 35.735444 398.000000 
 127.188556 35.735444 391.000000 127.188556 35.735444 392.000000 
 127.188667 35.735444 388.000000 127.188667 35.735444 386.000000 
 127.187556 35.735556 448.000000 127.187556 35.735556 455.000000 
 127.187667 35.735556 440.000000 127.187667 35.735556 445.000000 
 127.187778 35.735556 433.000000 127.187778 35.735556 437.000000 
 127.187889 35.735556 426.000000 127.187889 35.735556 430.000000 
 127.188111 35.735556 413.000000 127.188111 35.735556 416.000000 
 127.188333 35.735556 398.000000 127.188333 35.735556 402.000000 
 127.188444 35.735556 392.000000 127.188444 35.735556 396.000000 
 127.188556 35.735556 386.000000 127.188556 35.735556 390.000000 
 127.188667 35.735556 381.000000 127.188667 35.735556 383.000000 
 127.187556 35.735667 445.000000 127.187556 35.735667 449.000000 
 127.187667 35.735667 437.000000 127.187667 35.735667 441.000000 
 127.187778 35.735667 430.000000 127.187778 35.735667 434.000000 
 127.187889 35.735667 422.000000 127.187889 35.735667 425.000000 
 127.188111 35.735667 410.000000 127.188111 35.735667 412.000000 
 127.188333 35.735667 396.000000 127.188333 35.735667 398.000000 
 127.188444 35.735667 390.000000 127.188444 35.735667 393.000000 
 127.188556 35.735667 383.000000 127.188556 35.735667 386.000000 
 127.188667 35.735667 377.000000 127.188667 35.735667 380.000000 
 127.187667 35.735667 437.000000 127.187667 35.735667 441.000000 
 127.187778 35.735667 430.000000 127.187778 35.735667 434.000000 
 127.187889 35.735667 422.000000 127.187889 35.735667 425.000000 
 127.188000 35.735667 416.000000 127.188000 35.735667 419.000000 
 127.188222 35.735667 402.000000 127.188222 35.735667 405.000000 
 127.188444 35.735667 390.000000 127.188444 35.735667 393.000000 
 127.188556 35.735667 383.000000 127.188556 35.735667 386.000000 
 127.188667 35.735667 377.000000 127.188667 35.735667 380.000000 
 127.188778 35.735667 372.000000 127.188778 35.735667 374.000000 
 127.187667 35.735778 434.000000 127.187667 35.735778 439.000000 
 127.187778 35.735778 425.000000 127.187778 35.735778 431.000000 
 127.187889 35.735778 419.000000 127.187889 35.735778 424.000000 
 127.188000 35.735778 412.000000 127.188000 35.735778 417.000000 
 127.188222 35.735778 398.000000 127.188222 35.735778 404.000000 
 127.188444 35.735778 386.000000 127.188444 35.735778 394.000000 
 127.188556 35.735778 380.000000 127.188556 35.735778 390.000000 
 127.188667 35.735778 374.000000 127.188667 35.735778 386.000000 
 127.188778 35.735778 369.000000 127.188778 35.735778 380.000000 
 127.187667 35.735889 431.000000 127.187667 35.735889 436.000000 
 127.187778 35.735889 424.000000 127.187778 35.735889 429.000000 
 127.187889 35.735889 417.000000 127.187889 35.735889 422.000000 
 127.188000 35.735889 410.000000 127.188000 35.735889 417.000000 
 127.188222 35.735889 398.000000 127.188222 35.735889 411.000000 
 127.188444 35.735889 390.000000 127.188444 35.735889 405.000000 
 127.188556 35.735889 386.000000 127.188556 35.735889 402.000000 
 127.188667 35.735889 380.000000 127.188667 35.735889 399.000000 
 127.188778 35.735889 375.000000 127.188778 35.735889 395.000000 
 127.187778 35.735889 424.000000 127.187778 35.735889 429.000000 
 127.187889 35.735889 417.000000 127.187889 35.735889 422.000000 
 127.188000 35.735889 410.000000 127.188000 35.735889 417.000000 
 127.188111 35.735889 404.000000 127.188111 35.735889 414.000000 
 127.188333 35.735889 394.000000 127.188333 35.735889 408.000000 
 127.188556 35.735889 386.000000 127.188556 35.735889 402.000000 
 127.188667 35.735889 380.000000 127.188667 35.735889 399.000000 
 127.188778 35.735889 375.000000 127.188778 35.735889 395.000000 
 127.188889 35.735889 371.000000 127.188889 35.735889 390.000000 
 127.187778 35.736000 422.000000 127.187778 35.736000 432.000000 
 127.187889 35.736000 417.000000 127.187889 35.736000 424.000000 
 127.188000 35.736000 414.000000 127.188000 35.736000 422.000000 
 127.188111 35.736000 411.000000 127.188111 35.736000 419.000000 
 127.188333 35.736000 405.000000 127.188333 35.736000 414.000000 
 127.188556 35.736000 399.000000 127.188556 35.736000 408.000000 
 127.188667 35.736000 395.000000 127.188667 35.736000 406.000000 
 127.188778 35.736000 390.000000 127.188778 35.736000 403.000000 
 127.188889 35.736000 384.000000 127.188889 35.736000 400.000000 
 127.187778 35.736111 424.000000 127.187778 35.736111 441.000000 
 127.187889 35.736111 422.000000 127.187889 35.736111 437.000000 
 127.188000 35.736111 419.000000 127.188000 35.736111 433.000000 
 127.188111 35.736111 417.000000 127.188111 35.736111 429.000000 
 127.188333 35.736111 411.000000 127.188333 35.736111 423.000000 
 127.188556 35.736111 406.000000 127.188556 35.736111 418.000000 
 127.188667 35.736111 403.000000 127.188667 35.736111 415.000000 
 127.188778 35.736111 400.000000 127.188778 35.736111 412.000000 
 127.188889 35.736111 395.000000 127.188889 35.736111 407.000000 
 127.187778 35.736222 437.000000 127.187778 35.736222 448.000000 
 127.187889 35.736222 433.000000 127.187889 35.736222 444.000000 
 127.188000 35.736222 429.000000 127.188000 35.736222 440.000000 
 127.188111 35.736222 426.000000 127.188111 35.736222 436.000000 
 127.188333 35.736222 421.000000 127.188333 35.736222 429.000000 
 127.188556 35.736222 415.000000 127.188556 35.736222 424.000000 
 127.188667 35.736222 412.000000 127.188667 35.736222 419.000000 
 127.188778 35.736222 407.000000 127.188778 35.736222 414.000000 
 127.188889 35.736222 403.000000 127.188889 35.736222 408.000000 
 127.187889 35.736222 433.000000 127.187889 35.736222 444.000000 
 127.188000 35.736222 429.000000 127.188000 35.736222 440.000000 
 127.188111 35.736222 426.000000 127.188111 35.736222 436.000000 
 127.188222 35.736222 423.000000 127.188222 35.736222 433.000000 
 127.188444 35.736222 418.000000 127.188444 35.736222 427.000000 
 127.188667 35.736222 412.000000 127.188667 35.736222 419.000000 
 127.188778 35.736222 407.000000 127.188778 35.736222 414.000000 
 127.188889 35.736222 403.000000 127.188889 35.736222 408.000000 
 127.189000 35.736222 399.000000 127.189000 35.736222 403.000000 
 127.187889 35.736333 440.000000 127.187889 35.736333 454.000000 
 127.188000 35.736333 436.000000 127.188000 35.736333 450.000000 
 127.188111 35.736333 433.000000 127.188111 35.736333 445.000000 
 127.188222 35.736333 429.000000 127.188222 35.736333 440.000000 
 127.188444 35.736333 424.000000 127.188444 35.736333 429.000000 
 127.188667 35.736333 414.000000 127.188667 35.736333 415.000000 
 127.188778 35.736333 408.000000 127.188778 35.736333 408.000000 
 127.188889 35.736333 403.000000 127.188889 35.736333 402.000000 
 127.189000 35.736333 398.000000 127.189000 35.736333 395.000000 
 127.187889 35.736444 450.000000 127.187889 35.736444 459.000000 
 127.188000 35.736444 445.000000 127.188000 35.736444 453.000000 
 127.188111 35.736444 440.000000 127.188111 35.736444 447.000000 
 127.188222 35.736444 435.000000 127.188222 35.736444 440.000000 
 127.188444 35.736444 423.000000 127.188444 35.736444 427.000000 
 127.188667 35.736444 408.000000 127.188667 35.736444 410.000000 
 127.188778 35.736444 402.000000 127.188778 35.736444 402.000000 
 127.188889 35.736444 395.000000 127.188889 35.736444 396.000000 
 127.189000 35.736444 387.000000 127.189000 35.736444 389.000000 
 127.188000 35.736444 445.000000 127.188000 35.736444 453.000000 
 127.188111 35.736444 440.000000 127.188111 35.736444 447.000000 
 127.188222 35.736444 435.000000 127.188222 35.736444 440.000000 
 127.188333 35.736444 429.000000 127.188333 35.736444 434.000000 
 127.188556 35.736444 415.000000 127.188556 35.736444 419.000000 
 127.188778 35.736444 402.000000 127.188778 35.736444 402.000000 
 127.188889 35.736444 395.000000 127.188889 35.736444 396.000000 
 127.189000 35.736444 387.000000 127.189000 35.736444 389.000000 
 127.189111 35.736444 379.000000 127.189111 35.736444 382.000000 
 127.188000 35.736556 447.000000 127.188000 35.736556 454.000000 
 127.188111 35.736556 440.000000 127.188111 35.736556 446.000000 
 127.188222 35.736556 434.000000 127.188222 35.736556 439.000000 
 127.188333 35.736556 427.000000 127.188333 35.736556 432.000000 
 127.188556 35.736556 410.000000 127.188556 35.736556 415.000000 
 127.188778 35.736556 396.000000 127.188778 35.736556 396.000000 
 127.188889 35.736556 389.000000 127.188889 35.736556 390.000000 
 127.189000 35.736556 382.000000 127.189000 35.736556 384.000000 
 127.189111 35.736556 374.000000 127.189111 35.736556 377.000000 
 127.188000 35.736667 446.000000 127.188000 35.736667 455.000000 
 127.188111 35.736667 439.000000 127.188111 35.736667 447.000000 
 127.188222 35.736667 432.000000 127.188222 35.736667 440.000000 
 127.188333 35.736667 424.000000 127.188333 35.736667 433.000000 
 127.188556 35.736667 405.000000 127.188556 35.736667 415.000000 
 127.188778 35.736667 390.000000 127.188778 35.736667 397.000000 
 127.188889 35.736667 384.000000 127.188889 35.736667 391.000000 
 127.189000 35.736667 377.000000 127.189000 35.736667 387.000000 
 127.189111 35.736667 372.000000 127.189111 35.736667 384.000000 
 127.188111 35.736667 439.000000 127.188111 35.736667 447.000000 
 127.188222 35.736667 432.000000 127.188222 35.736667 440.000000 
 127.188333 35.736667 424.000000 127.188333 35.736667 433.000000 
 127.188444 35.736667 415.000000 127.188444 35.736667 425.000000 
 127.188667 35.736667 396.000000 127.188667 35.736667 405.000000 
 127.188889 35.736667 384.000000 127.188889 35.736667 391.000000 
 127.189000 35.736667 377.000000 127.189000 35.736667 387.000000 
 127.189111 35.736667 372.000000 127.189111 35.736667 384.000000 
 127.189222 35.736667 369.000000 127.189222 35.736667 381.000000 
 127.188111 35.736778 440.000000 127.188111 35.736778 450.000000 
 127.188222 35.736778 433.000000 127.188222 35.736778 443.000000 
 127.188333 35.736778 425.000000 127.188333 35.736778 435.000000 
 127.188444 35.736778 415.000000 127.188444 35.736778 426.000000 
 127.188667 35.736778 397.000000 127.188667 35.736778 408.000000 
 127.188889 35.736778 387.000000 127.188889 35.736778 398.000000 
 127.189000 35.736778 384.000000 127.189000 35.736778 396.000000 
 127.189111 35.736778 381.000000 127.189111 35.736778 394.000000 
 127.189222 35.736778 378.000000 127.189222 35.736778 392.000000 
 127.188111 35.736889 443.000000 127.188111 35.736889 456.000000 
 127.188222 35.736889 435.000000 127.188222 35.736889 448.000000 
 127.188333 35.736889 426.000000 127.188333 35.736889 439.000000 
 127.188444 35.736889 417.000000 127.188444 35.736889 430.000000 
 127.188667 35.736889 401.000000 127.188667 35.736889 416.000000 
 127.188889 35.736889 396.000000 127.188889 35.736889 412.000000 
 127.189000 35.736889 394.000000 127.189000 35.736889 410.000000 
 127.189111 35.736889 392.000000 127.189111 35.736889 408.000000 
 127.189222 35.736889 390.000000 127.189222 35.736889 406.000000 
 127.188222 35.736889 435.000000 127.188222 35.736889 448.000000 
 127.188333 35.736889 426.000000 127.188333 35.736889 439.000000 
 127.188444 35.736889 417.000000 127.188444 35.736889 430.000000 
 127.188556 35.736889 408.000000 127.188556 35.736889 421.000000 
 127.188778 35.736889 398.000000 127.188778 35.736889 414.000000 
 127.189000 35.736889 394.000000 127.189000 35.736889 410.000000 
 127.189111 35.736889 392.000000 127.189111 35.736889 408.000000 
 127.189222 35.736889 390.000000 127.189222 35.736889 406.000000 
 127.189333 35.736889 387.000000 127.189333 35.736889 405.000000 
 127.188222 35.737000 439.000000 127.188222 35.737000 452.000000 
 127.188333 35.737000 430.000000 127.188333 35.737000 443.000000 
 127.188444 35.737000 421.000000 127.188444 35.737000 434.000000 
 127.188556 35.737000 416.000000 127.188556 35.737000 425.000000 
 127.188778 35.737000 412.000000 127.188778 35.737000 423.000000 
 127.189000 35.737000 408.000000 127.189000 35.737000 419.000000 
 127.189111 35.737000 406.000000 127.189111 35.737000 417.000000 
 127.189222 35.737000 405.000000 127.189222 35.737000 414.000000 
 127.189333 35.737000 403.000000 127.189333 35.737000 412.000000 
 127.188222 35.737111 443.000000 127.188222 35.737111 458.000000 
 127.188333 35.737111 434.000000 127.188333 35.737111 448.000000 
 127.188444 35.737111 425.000000 127.188444 35.737111 441.000000 
 127.188556 35.737111 424.000000 127.188556 35.737111 439.000000 
 127.188778 35.737111 421.000000 127.188778 35.737111 437.000000 
 127.189000 35.737111 417.000000 127.189000 35.737111 433.000000 
 127.189111 35.737111 414.000000 127.189111 35.737111 430.000000 
 127.189222 35.737111 412.000000 127.189222 35.737111 427.000000 
 127.189333 35.737111 410.000000 127.189333 35.737111 425.000000 
 127.188333 35.737111 434.000000 127.188333 35.737111 448.000000 
 127.188444 35.737111 425.000000 127.188444 35.737111 441.000000 
 127.188556 35.737111 424.000000 127.188556 35.737111 439.000000 
 127.188667 35.737111 423.000000 127.188667 35.737111 438.000000 
 127.188889 35.737111 419.000000 127.188889 35.737111 436.000000 
 127.189111 35.737111 414.000000 127.189111 35.737111 430.000000 
 127.189222 35.737111 412.000000 127.189222 35.737111 427.000000 
 127.189333 35.737111 410.000000 127.189333 35.737111 425.000000 
 127.189444 35.737111 406.000000 127.189444 35.737111 419.000000 
 127.188333 35.737222 441.000000 127.188333 35.737222 453.000000 
 127.188444 35.737222 439.000000 127.188444 35.737222 448.000000 
 127.188556 35.737222 438.000000 127.188556 35.737222 448.000000 
 127.188667 35.737222 437.000000 127.188667 35.737222 449.000000 
 127.188889 35.737222 433.000000 127.188889 35.737222 448.000000 
 127.189111 35.737222 427.000000 127.189111 35.737222 439.000000 
 127.189222 35.737222 425.000000 127.189222 35.737222 435.000000 
 127.189333 35.737222 419.000000 127.189333 35.737222 431.000000 
 127.189444 35.737222 409.000000 127.189444 35.737222 424.000000 
 127.188333 35.737333 448.000000 127.188333 35.737333 466.000000 
 127.188444 35.737333 448.000000 127.188444 35.737333 462.000000 
 127.188556 35.737333 449.000000 127.188556 35.737333 462.000000 
 127.188667 35.737333 450.000000 127.188667 35.737333 462.000000 
 127.188889 35.737333 443.000000 127.188889 35.737333 459.000000 
 127.189111 35.737333 435.000000 127.189111 35.737333 450.000000 
 127.189222 35.737333 431.000000 127.189222 35.737333 447.000000 
 127.189333 35.737333 424.000000 127.189333 35.737333 439.000000 
 127.189444 35.737333 408.000000 127.189444 35.737333 429.000000 
 127.188444 35.737333 448.000000 127.188444 35.737333 462.000000 
 127.188556 35.737333 449.000000 127.188556 35.737333 462.000000 
 127.188667 35.737333 450.000000 127.188667 35.737333 462.000000 
 127.188778 35.737333 448.000000 127.188778 35.737333 461.000000 
 127.189000 35.737333 439.000000 127.189000 35.737333 455.000000 
 127.189222 35.737333 431.000000 127.189222 35.737333 447.000000 
 127.189333 35.737333 424.000000 127.189333 35.737333 439.000000 
 127.189444 35.737333 408.000000 127.189444 35.737333 429.000000 
 127.189556 35.737333 397.000000 127.189556 35.737333 418.000000 
 127.188444 35.737444 462.000000 127.188444 35.737444 470.000000 
 127.188556 35.737444 462.000000 127.188556 35.737444 470.000000 
 127.188667 35.737444 461.000000 127.188667 35.737444 470.000000 
 127.188778 35.737444 459.000000 127.188778 35.737444 469.000000 
 127.189000 35.737444 450.000000 127.189000 35.737444 462.000000 
 127.189222 35.737444 439.000000 127.189222 35.737444 454.000000 
 127.189333 35.737444 429.000000 127.189333 35.737444 450.000000 
 127.189444 35.737444 418.000000 127.189444 35.737444 435.000000 
 127.189556 35.737444 409.000000 127.189556 35.737444 424.000000 
 127.188444 35.737556 470.000000 127.188444 35.737556 485.000000 
 127.188556 35.737556 470.000000 127.188556 35.737556 483.000000 
 127.188667 35.737556 469.000000 127.188667 35.737556 481.000000 
 127.188778 35.737556 466.000000 127.188778 35.737556 478.000000 
 127.189000 35.737556 458.000000 127.189000 35.737556 468.000000 
 127.189222 35.737556 450.000000 127.189222 35.737556 456.000000 
 127.189333 35.737556 435.000000 127.189333 35.737556 451.000000 
 127.189444 35.737556 424.000000 127.189444 35.737556 440.000000 
 127.189556 35.737556 416.000000 127.189556 35.737556 429.000000 
 127.188556 35.737556 470.000000 127.188556 35.737556 483.000000 
 127.188667 35.737556 469.000000 127.188667 35.737556 481.000000 
 127.188778 35.737556 466.000000 127.188778 35.737556 478.000000 
 127.188889 35.737556 462.000000 127.188889 35.737556 475.000000 
 127.189111 35.737556 454.000000 127.189111 35.737556 462.000000 
 127.189333 35.737556 435.000000 127.189333 35.737556 451.000000 
 127.189444 35.737556 424.000000 127.189444 35.737556 440.000000 
 127.189556 35.737556 416.000000 127.189556 35.737556 429.000000 
 127.189667 35.737556 410.000000 127.189667 35.737556 420.000000 
 127.188556 35.737667 481.000000 127.188556 35.737667 487.000000 
 127.188667 35.737667 478.000000 127.188667 35.737667 483.000000 
 127.188778 35.737667 475.000000 127.188778 35.737667 478.000000 
 127.188889 35.737667 468.000000 127.188889 35.737667 474.000000 
 127.189111 35.737667 456.000000 127.189111 35.737667 459.000000 
 127.189333 35.737667 440.000000 127.189333 35.737667 447.000000 
 127.189444 35.737667 429.000000 127.189444 35.737667 437.000000 
 127.189556 35.737667 420.000000 127.189556 35.737667 427.000000 
 127.189667 35.737667 414.000000 127.189667 35.737667 418.000000 
 127.188556 35.737778 483.000000 127.188556 35.737778 484.000000 
 127.188667 35.737778 478.000000 127.188667 35.737778 479.000000 
 127.188778 35.737778 474.000000 127.188778 35.737778 474.000000 
 127.188889 35.737778 466.000000 127.188889 35.737778 466.000000 
 127.189111 35.737778 453.000000 127.189111 35.737778 453.000000 
 127.189333 35.737778 437.000000 127.189333 35.737778 437.000000 
 127.189444 35.737778 427.000000 127.189444 35.737778 428.000000 
 127.189556 35.737778 418.000000 127.189556 35.737778 419.000000 
 127.189667 35.737778 411.000000 127.189667 35.737778 412.000000 
 127.188667 35.737778 478.000000 127.188667 35.737778 479.000000 
 127.188778 35.737778 474.000000 127.188778 35.737778 474.000000 
 127.188889 35.737778 466.000000 127.188889 35.737778 466.000000 
 127.189000 35.737778 459.000000 127.189000 35.737778 459.000000 
 127.189222 35.737778 447.000000 127.189222 35.737778 446.000000 
 127.189444 35.737778 427.000000 127.189444 35.737778 428.000000 
 127.189556 35.737778 418.000000 127.189556 35.737778 419.000000 
 127.189667 35.737778 411.000000 127.189667 35.737778 412.000000 
 127.189778 35.737778 404.000000 127.189778 35.737778 404.000000 
 127.188667 35.737889 474.000000 127.188667 35.737889 474.000000 
 127.188778 35.737889 466.000000 127.188778 35.737889 467.000000 
 127.188889 35.737889 459.000000 127.188889 35.737889 461.000000 
 127.189000 35.737889 453.000000 127.189000 35.737889 454.000000 
 127.189222 35.737889 437.000000 127.189222 35.737889 439.000000 
 127.189444 35.737889 419.000000 127.189444 35.737889 421.000000 
 127.189556 35.737889 412.000000 127.189556 35.737889 413.000000 
 127.189667 35.737889 404.000000 127.189667 35.737889 405.000000 
 127.189778 35.737889 398.000000 127.189778 35.737889 399.000000 
 127.188667 35.738000 467.000000 127.188667 35.738000 465.000000 
 127.188778 35.738000 461.000000 127.188778 35.738000 459.000000 
 127.188889 35.738000 454.000000 127.188889 35.738000 452.000000 
 127.189000 35.738000 448.000000 127.189000 35.738000 445.000000 
 127.189222 35.738000 430.000000 127.189222 35.738000 428.000000 
 127.189444 35.738000 413.000000 127.189444 35.738000 410.000000 
 127.189556 35.738000 405.000000 127.189556 35.738000 401.000000 
 127.189667 35.738000 399.000000 127.189667 35.738000 395.000000 
 127.189778 35.738000 390.000000 127.189778 35.738000 388.000000 
 127.188778 35.738111 452.000000 127.188778 35.738111 454.000000 
 127.188889 35.738111 445.000000 127.188889 35.738111 447.000000 
 127.189000 35.738111 438.000000 127.189000 35.738111 440.000000 
 127.189111 35.738111 428.000000 127.189111 35.738111 432.000000 
 127.189333 35.738111 410.000000 127.189333 35.738111 415.000000 
 127.189556 35.738111 395.000000 127.189556 35.738111 396.000000 
 127.189667 35.738111 388.000000 127.189667 35.738111 389.000000 
 127.189778 35.738111 380.000000 127.189778 35.738111 382.000000 
 127.189889 35.738111 372.000000 127.189889 35.738111 375.000000 
 127.188778 35.738222 447.000000 127.188778 35.738222 449.000000 
 127.188889 35.738222 440.000000 127.188889 35.738222 443.000000 
 127.189000 35.738222 432.000000 127.189000 35.738222 436.000000 
 127.189111 35.738222 423.000000 127.189111 35.738222 429.000000 
 127.189333 35.738222 405.000000 127.189333 35.738222 414.000000 
 127.189556 35.738222 389.000000 127.189556 35.738222 400.000000 
 127.189667 35.738222 382.000000 127.189667 35.738222 394.000000 
 127.189778 35.738222 375.000000 127.189778 35.738222 388.000000 
 127.189889 35.738222 369.000000 127.189889 35.738222 382.000000 
 127.188778 35.738333 443.000000 127.188778 35.738333 451.000000 
 127.188889 35.738333 436.000000 127.188889 35.738333 445.000000 
 127.189000 35.738333 429.000000 127.189000 35.738333 438.000000 
 127.189111 35.738333 421.000000 127.189111 35.738333 431.000000 
 127.189333 35.738333 407.000000 127.189333 35.738333 417.000000 
 127.189556 35.738333 394.000000 127.189556 35.738333 405.000000 
 127.189667 35.738333 388.000000 127.189667 35.738333 399.000000 
 127.189778 35.738333 382.000000 127.189778 35.738333 394.000000 
 127.189889 35.738333 377.000000 127.189889 35.738333 388.000000 
 127.188889 35.738333 436.000000 127.188889 35.738333 445.000000 
 127.189000 35.738333 429.000000 127.189000 35.738333 438.000000 
 127.189111 35.738333 421.000000 127.189111 35.738333 431.000000 
 127.189222 35.738333 414.000000 127.189222 35.738333 423.000000 
 127.189444 35.738333 400.000000 127.189444 35.738333 411.000000 
 127.189667 35.738333 388.000000 127.189667 35.738333 399.000000 
 127.189778 35.738333 382.000000 127.189778 35.738333 394.000000 
 127.189889 35.738333 377.000000 127.189889 35.738333 388.000000 
 127.190000 35.738333 372.000000 127.190000 35.738333 384.000000 
 127.188889 35.738444 438.000000 127.188889 35.738444 448.000000 
 127.189000 35.738444 431.000000 127.189000 35.738444 442.000000 
 127.189111 35.738444 423.000000 127.189111 35.738444 436.000000 
 127.189222 35.738444 417.000000 127.189222 35.738444 429.000000 
 127.189444 35.738444 405.000000 127.189444 35.738444 417.000000 
 127.189667 35.738444 394.000000 127.189667 35.738444 406.000000 
 127.189778 35.738444 388.000000 127.189778 35.738444 399.000000 
 127.189889 35.738444 384.000000 127.189889 35.738444 395.000000 
 127.190000 35.738444 379.000000 127.190000 35.738444 391.000000 
 127.188889 35.738556 442.000000 127.188889 35.738556 458.000000 
 127.189000 35.738556 436.000000 127.189000 35.738556 450.000000 
 127.189111 35.738556 429.000000 127.189111 35.738556 446.000000 
 127.189222 35.738556 422.000000 127.189222 35.738556 440.000000 
 127.189444 35.738556 411.000000 127.189444 35.738556 427.000000 
 127.189667 35.738556 399.000000 127.189667 35.738556 418.000000 
 127.189778 35.738556 395.000000 127.189778 35.738556 413.000000 
 127.189889 35.738556 391.000000 127.189889 35.738556 407.000000 
 127.190000 35.738556 386.000000 127.190000 35.738556 402.000000 
 127.189000 35.738556 436.000000 127.189000 35.738556 450.000000 
 127.189111 35.738556 429.000000 127.189111 35.738556 446.000000 
 127.189222 35.738556 422.000000 127.189222 35.738556 440.000000 
 127.189333 35.738556 417.000000 127.189333 35.738556 434.000000 
 127.189556 35.738556 406.000000 127.189556 35.738556 422.000000 
 127.189778 35.738556 395.000000 127.189778 35.738556 413.000000 
 127.189889 35.738556 391.000000 127.189889 35.738556 407.000000 
 127.190000 35.738556 386.000000 127.190000 35.738556 402.000000 
 127.190111 35.738556 381.000000 127.190111 35.738556 397.000000 
 127.189000 35.738667 446.000000 127.189000 35.738667 461.000000 
 127.189111 35.738667 440.000000 127.189111 35.738667 456.000000 
 127.189222 35.738667 434.000000 127.189222 35.738667 449.000000 
 127.189333 35.738667 427.000000 127.189333 35.738667 445.000000 
 127.189556 35.738667 418.000000 127.189556 35.738667 433.000000 
 127.189778 35.738667 407.000000 127.189778 35.738667 422.000000 
 127.189889 35.738667 402.000000 127.189889 35.738667 417.000000 
 127.190000 35.738667 397.000000 127.190000 35.738667 411.000000 
 127.190111 35.738667 392.000000 127.190111 35.738667 404.000000 
 127.189000 35.738778 456.000000 127.189000 35.738778 476.000000 
 127.189111 35.738778 449.000000 127.189111 35.738778 475.000000 
 127.189222 35.738778 445.000000 127.189222 35.738778 472.000000 
 127.189333 35.738778 439.000000 127.189333 35.738778 464.000000 
 127.189556 35.738778 427.000000 127.189556 35.738778 452.000000 
 127.189778 35.738778 417.000000 127.189778 35.738778 438.000000 
 127.189889 35.738778 411.000000 127.189889 35.738778 428.000000 
 127.190000 35.738778 404.000000 127.190000 35.738778 417.000000 
 127.190111 35.738778 398.000000 127.190111 35.738778 407.000000 
 127.189111 35.738778 449.000000 127.189111 35.738778 475.000000 
 127.189222 35.738778 445.000000 127.189222 35.738778 472.000000 
 127.189333 35.738778 439.000000 127.189333 35.738778 464.000000 
 127.189444 35.738778 433.000000 127.189444 35.738778 457.000000 
 127.189667 35.738778 422.000000 127.189667 35.738778 446.000000 
 127.189889 35.738778 411.000000 127.189889 35.738778 428.000000 
 127.190000 35.738778 404.000000 127.190000 35.738778 417.000000 
 127.190111 35.738778 398.000000 127.190111 35.738778 407.000000 
 127.190222 35.738778 390.000000 127.190222 35.738778 397.000000 
 127.189111 35.738889 472.000000 127.189111 35.738889 480.000000 
 127.189222 35.738889 464.000000 127.189222 35.738889 478.000000 
 127.189333 35.738889 457.000000 127.189333 35.738889 475.000000 
 127.189444 35.738889 452.000000 127.189444 35.738889 467.000000 
 127.189667 35.738889 438.000000 127.189667 35.738889 452.000000 
 127.189889 35.738889 417.000000 127.189889 35.738889 428.000000 
 127.190000 35.738889 407.000000 127.190000 35.738889 417.000000 
 127.190111 35.738889 397.000000 127.190111 35.738889 407.000000 
 127.190222 35.738889 389.000000 127.190222 35.738889 396.000000 
 127.189111 35.739000 478.000000 127.189111 35.739000 490.000000 
 127.189222 35.739000 475.000000 127.189222 35.739000 487.000000 
 127.189333 35.739000 467.000000 127.189333 35.739000 478.000000 
 127.189444 35.739000 460.000000 127.189444 35.739000 469.000000 
 127.189667 35.739000 440.000000 127.189667 35.739000 449.000000 
 127.189889 35.739000 417.000000 127.189889 35.739000 428.000000 
 127.190000 35.739000 407.000000 127.190000 35.739000 419.000000 
 127.190111 35.739000 396.000000 127.190111 35.739000 410.000000 
 127.190222 35.739000 389.000000 127.190222 35.739000 402.000000 
 127.189222 35.739000 475.000000 127.189222 35.739000 487.000000 
 127.189333 35.739000 467.000000 127.189333 35.739000 478.000000 
 127.189444 35.739000 460.000000 127.189444 35.739000 469.000000 
 127.189556 35.739000 452.000000 127.189556 35.739000 459.000000 
 127.189778 35.739000 428.000000 127.189778 35.739000 438.000000 
 127.190000 35.739000 407.000000 127.190000 35.739000 419.000000 
 127.190111 35.739000 396.000000 127.190111 35.739000 410.000000 
 127.190222 35.739000 389.000000 127.190222 35.739000 402.000000 
 127.190333 35.739000 382.000000 127.190333 35.739000 395.000000 
 127.189222 35.739111 478.000000 127.189222 35.739111 487.000000 
 127.189333 35.739111 469.000000 127.189333 35.739111 478.000000 
 127.189444 35.739111 459.000000 127.189444 35.739111 468.000000 
 127.189556 35.739111 449.000000 127.189556 35.739111 457.000000 
 127.189778 35.739111 428.000000 127.189778 35.739111 438.000000 
 127.190000 35.739111 410.000000 127.190000 35.739111 421.000000 
 127.190111 35.739111 402.000000 127.190111 35.739111 413.000000 
 127.190222 35.739111 395.000000 127.190222 35.739111 406.000000 
 127.190333 35.739111 388.000000 127.190333 35.739111 399.000000 
 127.189222 35.739222 478.000000 127.189222 35.739222 486.000000 
 127.189333 35.739222 468.000000 127.189333 35.739222 480.000000 
 127.189444 35.739222 457.000000 127.189444 35.739222 471.000000 
 127.189556 35.739222 447.000000 127.189556 35.739222 460.000000 
 127.189778 35.739222 430.000000 127.189778 35.739222 442.000000 
 127.190000 35.739222 413.000000 127.190000 35.739222 426.000000 
 127.190111 35.739222 406.000000 127.190111 35.739222 418.000000 
 127.190222 35.739222 399.000000 127.190222 35.739222 411.000000 
 127.190333 35.739222 392.000000 127.190333 35.739222 404.000000 
 127.189333 35.739222 468.000000 127.189333 35.739222 480.000000 
 127.189444 35.739222 457.000000 127.189444 35.739222 471.000000 
 127.189556 35.739222 447.000000 127.189556 35.739222 460.000000 
 127.189667 35.739222 438.000000 127.189667 35.739222 450.000000 
 127.189889 35.739222 421.000000 127.189889 35.739222 434.000000 
 127.190111 35.739222 406.000000 127.190111 35.739222 418.000000 
 127.190222 35.739222 399.000000 127.190222 35.739222 411.000000 
 127.190333 35.739222 392.000000 127.190333 35.739222 404.000000 
 127.190444 35.739222 385.000000 127.190444 35.739222 398.000000 
 127.189333 35.739333 471.000000 127.189333 35.739333 483.000000 
 127.189444 35.739333 460.000000 127.189444 35.739333 475.000000 
 127.189556 35.739333 450.000000 127.189556 35.739333 465.000000 
 127.189667 35.739333 442.000000 127.189667 35.739333 455.000000 
 127.189889 35.739333 426.000000 127.189889 35.739333 437.000000 
 127.190111 35.739333 411.000000 127.190111 35.739333 421.000000 
 127.190222 35.739333 404.000000 127.190222 35.739333 414.000000 
 127.190333 35.739333 398.000000 127.190333 35.739333 408.000000 
 127.190444 35.739333 391.000000 127.190444 35.739333 401.000000 
 127.189333 35.739444 475.000000 127.189333 35.739444 485.000000 
 127.189444 35.739444 465.000000 127.189444 35.739444 484.000000 
 127.189556 35.739444 455.000000 127.189556 35.739444 473.000000 
 127.189667 35.739444 446.000000 127.189667 35.739444 461.000000 
 127.189889 35.739444 429.000000 127.189889 35.739444 442.000000 
 127.190111 35.739444 414.000000 127.190111 35.739444 426.000000 
 127.190222 35.739444 408.000000 127.190222 35.739444 419.000000 
 127.190333 35.739444 401.000000 127.190333 35.739444 413.000000 
 127.190444 35.739444 395.000000 127.190444 35.739444 407.000000 
 127.189444 35.739444 465.000000 127.189444 35.739444 484.000000 
 127.189556 35.739444 455.000000 127.189556 35.739444 473.000000 
 127.189667 35.739444 446.000000 127.189667 35.739444 461.000000 
 127.189778 35.739444 437.000000 127.189778 35.739444 450.000000 
 127.190000 35.739444 421.000000 127.190000 35.739444 434.000000 
 127.190222 35.739444 408.000000 127.190222 35.739444 419.000000 
 127.190333 35.739444 401.000000 127.190333 35.739444 413.000000 
 127.190444 35.739444 395.000000 127.190444 35.739444 407.000000 
 127.190556 35.739444 388.000000 127.190556 35.739444 400.000000 
 127.189444 35.739556 473.000000 127.189444 35.739556 486.000000 
 127.189556 35.739556 461.000000 127.189556 35.739556 477.000000 
 127.189667 35.739556 450.000000 127.189667 35.739556 464.000000 
 127.189778 35.739556 442.000000 127.189778 35.739556 454.000000 
 127.190000 35.739556 426.000000 127.190000 35.739556 437.000000 
 127.190222 35.739556 413.000000 127.190222 35.739556 423.000000 
 127.190333 35.739556 407.000000 127.190333 35.739556 417.000000 
 127.190444 35.739556 400.000000 127.190444 35.739556 411.000000 
 127.190556 35.739556 395.000000 127.190556 35.739556 406.000000 
 127.189444 35.739667 477.000000 127.189444 35.739667 485.000000 
 127.189556 35.739667 464.000000 127.189556 35.739667 477.000000 
 127.189667 35.739667 454.000000 127.189667 35.739667 467.000000 
 127.189778 35.739667 445.000000 127.189778 35.739667 458.000000 
 127.190000 35.739667 430.000000 127.190000 35.739667 443.000000 
 127.190222 35.739667 417.000000 127.190222 35.739667 430.000000 
 127.190333 35.739667 411.000000 127.190333 35.739667 424.000000 
 127.190444 35.739667 406.000000 127.190444 35.739667 420.000000 
 127.190556 35.739667 400.000000 127.190556 35.739667 415.000000 
 127.189556 35.739667 464.000000 127.189556 35.739667 477.000000 
 127.189667 35.739667 454.000000 127.189667 35.739667 467.000000 
 127.189778 35.739667 445.000000 127.189778 35.739667 458.000000 
 127.189889 35.739667 437.000000 127.189889 35.739667 449.000000 
 127.190111 35.739667 423.000000 127.190111 35.739667 436.000000 
 127.190333 35.739667 411.000000 127.190333 35.739667 424.000000 
 127.190444 35.739667 406.000000 127.190444 35.739667 420.000000 
 127.190556 35.739667 400.000000 127.190556 35.739667 415.000000 
 127.190667 35.739667 395.000000 127.190667 35.739667 409.000000 
 127.189556 35.739778 467.000000 127.189556 35.739778 477.000000 
 127.189667 35.739778 458.000000 127.189667 35.739778 469.000000 
 127.189778 35.739778 449.000000 127.189778 35.739778 462.000000 
 127.189889 35.739778 443.000000 127.189889 35.739778 455.000000 
 127.190111 35.739778 430.000000 127.190111 35.739778 442.000000 
 127.190333 35.739778 420.000000 127.190333 35.739778 431.000000 
 127.190444 35.739778 415.000000 127.190444 35.739778 427.000000 
 127.190556 35.739778 409.000000 127.190556 35.739778 422.000000 
 127.190667 35.739778 403.000000 127.190667 35.739778 415.000000 
 127.189556 35.739889 469.000000 127.189556 35.739889 482.000000 
 127.189667 35.739889 462.000000 127.189667 35.739889 476.000000 
 127.189778 35.739889 455.000000 127.189778 35.739889 470.000000 
 127.189889 35.739889 448.000000 127.189889 35.739889 463.000000 
 127.190111 35.739889 436.000000 127.190111 35.739889 449.000000 
 127.190333 35.739889 427.000000 127.190333 35.739889 438.000000 
 127.190444 35.739889 422.000000 127.190444 35.739889 433.000000 
 127.190556 35.739889 415.000000 127.190556 35.739889 426.000000 
 127.190667 35.739889 408.000000 127.190667 35.739889 418.000000 
 127.189667 35.739889 462.000000 127.189667 35.739889 476.000000 
 127.189778 35.739889 455.000000 127.189778 35.739889 470.000000 
 127.189889 35.739889 448.000000 127.189889 35.739889 463.000000 
 127.190000 35.739889 442.000000 127.190000 35.739889 456.000000 
 127.190222 35.739889 431.000000 127.190222 35.739889 443.000000 
 127.190444 35.739889 422.000000 127.190444 35.739889 433.000000 
 127.190556 35.739889 415.000000 127.190556 35.739889 426.000000 
 127.190667 35.739889 408.000000 127.190667 35.739889 418.000000 
 127.190778 35.739889 401.000000 127.190778 35.739889 412.000000 
 127.189667 35.740000 470.000000 127.189667 35.740000 483.000000 
 127.189778 35.740000 463.000000 127.189778 35.740000 476.000000 
 127.189889 35.740000 456.000000 127.189889 35.740000 469.000000 
 127.190000 35.740000 449.000000 127.190000 35.740000 463.000000 
 127.190222 35.740000 438.000000 127.190222 35.740000 448.000000 
 127.190444 35.740000 426.000000 127.190444 35.740000 436.000000 
 127.190556 35.740000 418.000000 127.190556 35.740000 427.000000 
 127.190667 35.740000 412.000000 127.190667 35.740000 420.000000 
 127.190778 35.740000 405.000000 127.190778 35.740000 415.000000 
 127.189667 35.740111 476.000000 127.189667 35.740111 487.000000 
 127.189778 35.740111 469.000000 127.189778 35.740111 485.000000 
 127.189889 35.740111 463.000000 127.189889 35.740111 476.000000 
 127.190000 35.740111 455.000000 127.190000 35.740111 469.000000 
 127.190222 35.740111 442.000000 127.190222 35.740111 454.000000 
 127.190444 35.740111 427.000000 127.190444 35.740111 440.000000 
 127.190556 35.740111 420.000000 127.190556 35.740111 432.000000 
 127.190667 35.740111 415.000000 127.190667 35.740111 425.000000 
 127.190778 35.740111 410.000000 127.190778 35.740111 423.000000 
 127.189778 35.740111 469.000000 127.189778 35.740111 485.000000 
 127.189889 35.740111 463.000000 127.189889 35.740111 476.000000 
 127.190000 35.740111 455.000000 127.190000 35.740111 469.000000 
 127.190111 35.740111 448.000000 127.190111 35.740111 462.000000 
 127.190333 35.740111 436.000000 127.190333 35.740111 447.000000 
 127.190556 35.740111 420.000000 127.190556 35.740111 432.000000 
 127.190667 35.740111 415.000000 127.190667 35.740111 425.000000 
 127.190778 35.740111 410.000000 127.190778 35.740111 423.000000 
 127.190889 35.740111 405.000000 127.190889 35.740111 418.000000 
 127.189778 35.740222 476.000000 127.189778 35.740222 490.000000 
 127.189889 35.740222 469.000000 127.189889 35.740222 487.000000 
 127.190000 35.740222 462.000000 127.190000 35.740222 480.000000 
 127.190111 35.740222 454.000000 127.190111 35.740222 472.000000 
 127.190333 35.740222 440.000000 127.190333 35.740222 456.000000 
 127.190556 35.740222 425.000000 127.190556 35.740222 441.000000 
 127.190667 35.740222 423.000000 127.190667 35.740222 434.000000 
 127.190778 35.740222 418.000000 127.190778 35.740222 429.000000 
 127.190889 35.740222 414.000000 127.190889 35.740222 424.000000 
 127.189778 35.740333 487.000000 127.189778 35.740333 490.000000 
 127.189889 35.740333 480.000000 127.189889 35.740333 490.000000 
 127.190000 35.740333 472.000000 127.190000 35.740333 487.000000 
 127.190111 35.740333 465.000000 127.190111 35.740333 479.000000 
 127.190333 35.740333 448.000000 127.190333 35.740333 465.000000 
 127.190556 35.740333 434.000000 127.190556 35.740333 445.000000 
 127.190667 35.740333 429.000000 127.190667 35.740333 440.000000 
 127.190778 35.740333 424.000000 127.190778 35.740333 435.000000 
 127.190889 35.740333 420.000000 127.190889 35.740333 431.000000 
 127.189889 35.740333 480.000000 127.189889 35.740333 490.000000 
 127.190000 35.740333 472.000000 127.190000 35.740333 487.000000 
 127.190111 35.740333 465.000000 127.190111 35.740333 479.000000 
 127.190222 35.740333 456.000000 127.190222 35.740333 473.000000 
 127.190444 35.740333 441.000000 127.190444 35.740333 454.000000 
 127.190667 35.740333 429.000000 127.190667 35.740333 440.000000 
 127.190778 35.740333 424.000000 127.190778 35.740333 435.000000 
 127.190889 35.740333 420.000000 127.190889 35.740333 431.000000 
 127.191000 35.740333 416.000000 127.191000 35.740333 427.000000 
 127.189889 35.740444 487.000000 127.189889 35.740444 493.000000 
 127.190000 35.740444 479.000000 127.190000 35.740444 495.000000 
 127.190111 35.740444 473.000000 127.190111 35.740444 495.000000 
 127.190222 35.740444 465.000000 127.190222 35.740444 493.000000 
 127.190444 35.740444 445.000000 127.190444 35.740444 474.000000 
 127.190667 35.740444 435.000000 127.190667 35.740444 447.000000 
 127.190778 35.740444 431.000000 127.190778 35.740444 444.000000 
 127.190889 35.740444 427.000000 127.190889 35.740444 441.000000 
 127.191000 35.740444 424.000000 127.191000 35.740444 437.000000 
 127.189889 35.740556 495.000000 127.189889 35.740556 495.000000 
 127.190000 35.740556 495.000000 127.190000 35.740556 498.000000 
 127.190111 35.740556 493.000000 127.190111 35.740556 502.000000 
 127.190222 35.740556 487.000000 127.190222 35.740556 506.000000 
 127.190444 35.740556 460.000000 127.190444 35.740556 501.000000 
 127.190667 35.740556 444.000000 127.190667 35.740556 467.000000 
 127.190778 35.740556 441.000000 127.190778 35.740556 453.000000 
 127.190889 35.740556 437.000000 127.190889 35.740556 448.000000 
 127.191000 35.740556 433.000000 127.191000 35.740556 444.000000 
 127.190000 35.740556 495.000000 127.190000 35.740556 498.000000 
 127.190111 35.740556 493.000000 127.190111 35.740556 502.000000 
 127.190222 35.740556 487.000000 127.190222 35.740556 506.000000 
 127.190333 35.740556 474.000000 127.190333 35.740556 506.000000 
 127.190556 35.740556 447.000000 127.190556 35.740556 481.000000 
 127.190778 35.740556 441.000000 127.190778 35.740556 453.000000 
 127.190889 35.740556 437.000000 127.190889 35.740556 448.000000 
 127.191000 35.740556 433.000000 127.191000 35.740556 444.000000 
 127.191111 35.740556 427.000000 127.191111 35.740556 438.000000 
 127.190000 35.740667 502.000000 127.190000 35.740667 501.000000 
 127.190111 35.740667 506.000000 127.190111 35.740667 506.000000 
 127.190222 35.740667 506.000000 127.190222 35.740667 511.000000 
 127.190333 35.740667 501.000000 127.190333 35.740667 515.000000 
 127.190556 35.740667 467.000000 127.190556 35.740667 507.000000 
 127.190778 35.740667 448.000000 127.190778 35.740667 479.000000 
 127.190889 35.740667 444.000000 127.190889 35.740667 467.000000 
 127.191000 35.740667 438.000000 127.191000 35.740667 456.000000 
 127.191111 35.740667 432.000000 127.191111 35.740667 447.000000 
 127.190000 35.740778 506.000000 127.190000 35.740778 501.000000 
 127.190111 35.740778 511.000000 127.190111 35.740778 506.000000 
 127.190222 35.740778 515.000000 127.190222 35.740778 511.000000 
 127.190333 35.740778 516.000000 127.190333 35.740778 516.000000 
 127.190556 35.740778 492.000000 127.190556 35.740778 515.000000 
 127.190778 35.740778 467.000000 127.190778 35.740778 485.000000 
 127.190889 35.740778 456.000000 127.190889 35.740778 475.000000 
 127.191000 35.740778 447.000000 127.191000 35.740778 462.000000 
 127.191111 35.740778 438.000000 127.191111 35.740778 451.000000 
 127.190000 35.740889 506.000000 127.190000 35.740889 501.000000 
 127.190111 35.740889 511.000000 127.190111 35.740889 506.000000 
 127.190222 35.740889 516.000000 127.190222 35.740889 510.000000 
 127.190333 35.740889 521.000000 127.190333 35.740889 515.000000 
 127.190556 35.740889 499.000000 127.190556 35.740889 513.000000 
 127.190778 35.740889 475.000000 127.190778 35.740889 485.000000 
 127.190889 35.740889 462.000000 127.190889 35.740889 473.000000 
 127.191000 35.740889 451.000000 127.191000 35.740889 462.000000 
 127.191111 35.740889 441.000000 127.191111 35.740889 451.000000 
 127.190111 35.740889 511.000000 127.190111 35.740889 506.000000 
 127.190222 35.740889 516.000000 127.190222 35.740889 510.000000 
 127.190333 35.740889 521.000000 127.190333 35.740889 515.000000 
 127.190444 35.740889 515.000000 127.190444 35.740889 517.000000 
 127.190667 35.740889 485.000000 127.190667 35.740889 498.000000 
 127.190889 35.740889 462.000000 127.190889 35.740889 473.000000 
 127.191000 35.740889 451.000000 127.191000 35.740889 462.000000 
 127.191111 35.740889 441.000000 127.191111 35.740889 451.000000 
 127.191222 35.740889 433.000000 127.191222 35.740889 443.000000 
 127.190111 35.741000 510.000000 127.190111 35.741000 505.000000 
 127.190222 35.741000 515.000000 127.190222 35.741000 510.000000 
 127.190333 35.741000 517.000000 127.190333 35.741000 514.000000 
 127.190444 35.741000 513.000000 127.190444 35.741000 515.000000 
 127.190667 35.741000 485.000000 127.190667 35.741000 496.000000 
 127.190889 35.741000 462.000000 127.190889 35.741000 472.000000 
 127.191000 35.741000 451.000000 127.191000 35.741000 462.000000 
 127.191111 35.741000 443.000000 127.191111 35.741000 451.000000 
 127.191222 35.741000 435.000000 127.191222 35.741000 443.000000 
 127.190111 35.741111 510.000000 127.190111 35.741111 504.000000 
 127.190222 35.741111 514.000000 127.190222 35.741111 509.000000 
 127.190333 35.741111 515.000000 127.190333 35.741111 513.000000 
 127.190444 35.741111 511.000000 127.190444 35.741111 515.000000 
 127.190667 35.741111 484.000000 127.190667 35.741111 495.000000 
 127.190889 35.741111 462.000000 127.190889 35.741111 471.000000 
 127.191000 35.741111 451.000000 127.191000 35.741111 463.000000 
 127.191111 35.741111 443.000000 127.191111 35.741111 455.000000 
 127.191222 35.741111 436.000000 127.191222 35.741111 447.000000 
 127.190222 35.741111 514.000000 127.190222 35.741111 509.000000 
 127.190333 35.741111 515.000000 127.190333 35.741111 513.000000 
 127.190444 35.741111 511.000000 127.190444 35.741111 515.000000 
 127.190556 35.741111 496.000000 127.190556 35.741111 506.000000 
 127.190778 35.741111 472.000000 127.190778 35.741111 482.000000 
 127.191000 35.741111 451.000000 127.191000 35.741111 463.000000 
 127.191111 35.741111 443.000000 127.191111 35.741111 455.000000 
 127.191222 35.741111 436.000000 127.191222 35.741111 447.000000 
 127.191333 35.741111 428.000000 127.191333 35.741111 441.000000 
 127.190222 35.741222 513.000000 127.190222 35.741222 508.000000 
 127.190333 35.741222 515.000000 127.190333 35.741222 512.000000 
 127.190444 35.741222 506.000000 127.190444 35.741222 515.000000 
 127.190556 35.741222 495.000000 127.190556 35.741222 507.000000 
 127.190778 35.741222 471.000000 127.190778 35.741222 485.000000 
 127.191000 35.741222 455.000000 127.191000 35.741222 469.000000 
 127.191111 35.741222 447.000000 127.191111 35.741222 462.000000 
 127.191222 35.741222 441.000000 127.191222 35.741222 455.000000 
 127.191333 35.741222 434.000000 127.191333 35.741222 447.000000 
 127.190222 35.741333 512.000000 127.190222 35.741333 507.000000 
 127.190333 35.741333 515.000000 127.190333 35.741333 511.000000 
 127.190444 35.741333 507.000000 127.190444 35.741333 515.000000 
 127.190556 35.741333 495.000000 127.190556 35.741333 513.000000 
 127.190778 35.741333 474.000000 127.190778 35.741333 494.000000 
 127.191000 35.741333 462.000000 127.191000 35.741333 480.000000 
 127.191111 35.741333 455.000000 127.191111 35.741333 474.000000 
 127.191222 35.741333 447.000000 127.191222 35.741333 466.000000 
 127.191333 35.741333 441.000000 127.191333 35.741333 459.000000 
 127.190333 35.741333 515.000000 127.190333 35.741333 511.000000 
 127.190444 35.741333 507.000000 127.190444 35.741333 515.000000 
 127.190556 35.741333 495.000000 127.190556 35.741333 513.000000 
 127.190667 35.741333 485.000000 127.190667 35.741333 501.000000 
 127.190889 35.741333 469.000000 127.190889 35.741333 487.000000 
 127.191111 35.741333 455.000000 127.191111 35.741333 474.000000 
 127.191222 35.741333 447.000000 127.191222 35.741333 466.000000 
 127.191333 35.741333 441.000000 127.191333 35.741333 459.000000 
 127.191444 35.741333 431.000000 127.191444 35.741333 452.000000 
 127.190333 35.741444 515.000000 127.190333 35.741444 511.000000 
 127.190444 35.741444 513.000000 127.190444 35.741444 515.000000 
 127.190556 35.741444 501.000000 127.190556 35.741444 517.000000 
 127.190667 35.741444 494.000000 127.190667 35.741444 510.000000 
 127.190889 35.741444 480.000000 127.190889 35.741444 494.000000 
 127.191111 35.741444 466.000000 127.191111 35.741444 480.000000 
 127.191222 35.741444 459.000000 127.191222 35.741444 473.000000 
 127.191333 35.741444 452.000000 127.191333 35.741444 464.000000 
 127.191444 35.741444 441.000000 127.191444 35.741444 455.000000 
 127.190333 35.741556 515.000000 127.190333 35.741556 509.000000 
 127.190444 35.741556 517.000000 127.190444 35.741556 513.000000 
 127.190556 35.741556 510.000000 127.190556 35.741556 520.000000 
 127.190667 35.741556 501.000000 127.190667 35.741556 520.000000 
 127.190889 35.741556 487.000000 127.190889 35.741556 505.000000 
 127.191111 35.741556 473.000000 127.191111 35.741556 485.000000 
 127.191222 35.741556 464.000000 127.191222 35.741556 476.000000 
 127.191333 35.741556 455.000000 127.191333 35.741556 467.000000 
 127.191444 35.741556 444.000000 127.191444 35.741556 457.000000 
 127.190444 35.741556 517.000000 127.190444 35.741556 513.000000 
 127.190556 35.741556 510.000000 127.190556 35.741556 520.000000 
 127.190667 35.741556 501.000000 127.190667 35.741556 520.000000 
 127.190778 35.741556 494.000000 127.190778 35.741556 511.000000 
 127.191000 35.741556 480.000000 127.191000 35.741556 495.000000 
 127.191222 35.741556 464.000000 127.191222 35.741556 476.000000 
 127.191333 35.741556 455.000000 127.191333 35.741556 467.000000 
 127.191444 35.741556 444.000000 127.191444 35.741556 457.000000 
 127.191556 35.741556 433.000000 127.191556 35.741556 447.000000 
 127.190444 35.741667 520.000000 127.190444 35.741667 513.000000 
 127.190556 35.741667 520.000000 127.190556 35.741667 519.000000 
 127.190667 35.741667 511.000000 127.190667 35.741667 521.000000 
 127.190778 35.741667 505.000000 127.190778 35.741667 517.000000 
 127.191000 35.741667 485.000000 127.191000 35.741667 498.000000 
 127.191222 35.741667 467.000000 127.191222 35.741667 478.000000 
 127.191333 35.741667 457.000000 127.191333 35.741667 469.000000 
 127.191444 35.741667 447.000000 127.191444 35.741667 459.000000 
 127.191556 35.741667 439.000000 127.191556 35.741667 451.000000 
 127.190444 35.741778 519.000000 127.190444 35.741778 512.000000 
 127.190556 35.741778 521.000000 127.190556 35.741778 518.000000 
 127.190667 35.741778 517.000000 127.190667 35.741778 520.000000 
 127.190778 35.741778 507.000000 127.190778 35.741778 520.000000 
 127.191000 35.741778 488.000000 127.191000 35.741778 500.000000 
 127.191222 35.741778 469.000000 127.191222 35.741778 482.000000 
 127.191333 35.741778 459.000000 127.191333 35.741778 473.000000 
 127.191444 35.741778 451.000000 127.191444 35.741778 467.000000 
 127.191556 35.741778 446.000000 127.191556 35.741778 462.000000 
 127.190556 35.741778 521.000000 127.190556 35.741778 518.000000 
 127.190667 35.741778 517.000000 127.190667 35.741778 520.000000 
 127.190778 35.741778 507.000000 127.190778 35.741778 520.000000 
 127.190889 35.741778 498.000000 127.190889 35.741778 509.000000 
 127.191111 35.741778 478.000000 127.191111 35.741778 490.000000 
 127.191333 35.741778 459.000000 127.191333 35.741778 473.000000 
 127.191444 35.741778 451.000000 127.191444 35.741778 467.000000 
 127.191556 35.741778 446.000000 127.191556 35.741778 462.000000 
 127.191667 35.741778 441.000000 127.191667 35.741778 459.000000 
 127.190556 35.741889 520.000000 127.190556 35.741889 516.000000 
 127.190667 35.741889 520.000000 127.190667 35.741889 522.000000 
 127.190778 35.741889 509.000000 127.190778 35.741889 524.000000 
 127.190889 35.741889 500.000000 127.190889 35.741889 517.000000 
 127.191111 35.741889 482.000000 127.191111 35.741889 496.000000 
 127.191333 35.741889 467.000000 127.191333 35.741889 480.000000 
 127.191444 35.741889 462.000000 127.191444 35.741889 474.000000 
 127.191556 35.741889 459.000000 127.191556 35.741889 471.000000 
 127.191667 35.741889 455.000000 127.191667 35.741889 469.000000 
 127.190556 35.742000 522.000000 127.190556 35.742000 515.000000 
 127.190667 35.742000 524.000000 127.190667 35.742000 522.000000 
 127.190778 35.742000 517.000000 127.190778 35.742000 525.000000 
 127.190889 35.742000 504.000000 127.190889 35.742000 523.000000 
 127.191111 35.742000 488.000000 127.191111 35.742000 502.000000 
 127.191333 35.742000 474.000000 127.191333 35.742000 488.000000 
 127.191444 35.742000 471.000000 127.191444 35.742000 483.000000 
 127.191556 35.742000 469.000000 127.191556 35.742000 480.000000 
 127.191667 35.742000 465.000000 127.191667 35.742000 478.000000 
 127.190667 35.742000 524.000000 127.190667 35.742000 522.000000 
 127.190778 35.742000 517.000000 127.190778 35.742000 525.000000 
 127.190889 35.742000 504.000000 127.190889 35.742000 523.000000 
 127.191000 35.742000 496.000000 127.191000 35.742000 513.000000 
 127.191222 35.742000 480.000000 127.191222 35.742000 494.000000 
 127.191444 35.742000 471.000000 127.191444 35.742000 483.000000 
 127.191556 35.742000 469.000000 127.191556 35.742000 480.000000 
 127.191667 35.742000 465.000000 127.191667 35.742000 478.000000 
 127.191778 35.742000 460.000000 127.191778 35.742000 475.000000 
 127.190667 35.742111 525.000000 127.190667 35.742111 522.000000 
 127.190778 35.742111 523.000000 127.190778 35.742111 526.000000 
 127.190889 35.742111 513.000000 127.190889 35.742111 526.000000 
 127.191000 35.742111 502.000000 127.191000 35.742111 522.000000 
 127.191222 35.742111 488.000000 127.191222 35.742111 503.000000 
 127.191444 35.742111 480.000000 127.191444 35.742111 497.000000 
 127.191556 35.742111 478.000000 127.191556 35.742111 494.000000 
 127.191667 35.742111 475.000000 127.191667 35.742111 490.000000 
 127.191778 35.742111 468.000000 127.191778 35.742111 484.000000 
 127.190667 35.742222 526.000000 127.190667 35.742222 521.000000 
 127.190778 35.742222 526.000000 127.190778 35.742222 525.000000 
 127.190889 35.742222 522.000000 127.190889 35.742222 525.000000 
 127.191000 35.742222 514.000000 127.191000 35.742222 519.000000 
 127.191222 35.742222 499.000000 127.191222 35.742222 511.000000 
 127.191444 35.742222 494.000000 127.191444 35.742222 503.000000 
 127.191556 35.742222 490.000000 127.191556 35.742222 501.000000 
 127.191667 35.742222 484.000000 127.191667 35.742222 498.000000 
 127.191778 35.742222 477.000000 127.191778 35.742222 490.000000 
 127.190778 35.742222 526.000000 127.190778 35.742222 525.000000 
 127.190889 35.742222 522.000000 127.190889 35.742222 525.000000 
 127.191000 35.742222 514.000000 127.191000 35.742222 519.000000 
 127.191111 35.742222 503.000000 127.191111 35.742222 515.000000 
 127.191333 35.742222 497.000000 127.191333 35.742222 506.000000 
 127.191556 35.742222 490.000000 127.191556 35.742222 501.000000 
 127.191667 35.742222 484.000000 127.191667 35.742222 498.000000 
 127.191778 35.742222 477.000000 127.191778 35.742222 490.000000 
 127.191889 35.742222 468.000000 127.191889 35.742222 481.000000 
 127.190778 35.742333 525.000000 127.190778 35.742333 513.000000 
 127.190889 35.742333 519.000000 127.190889 35.742333 514.000000 
 127.191000 35.742333 515.000000 127.191000 35.742333 513.000000 
 127.191111 35.742333 511.000000 127.191111 35.742333 513.000000 
 127.191333 35.742333 503.000000 127.191333 35.742333 512.000000 
 127.191556 35.742333 498.000000 127.191556 35.742333 508.000000 
 127.191667 35.742333 490.000000 127.191667 35.742333 504.000000 
 127.191778 35.742333 481.000000 127.191778 35.742333 497.000000 
 127.191889 35.742333 473.000000 127.191889 35.742333 488.000000 
 127.190778 35.742444 514.000000 127.190778 35.742444 508.000000 
 127.190889 35.742444 513.000000 127.190889 35.742444 509.000000 
 127.191000 35.742444 513.000000 127.191000 35.742444 510.000000 
 127.191111 35.742444 513.000000 127.191111 35.742444 510.000000 
 127.191333 35.742444 511.000000 127.191333 35.742444 511.000000 
 127.191556 35.742444 504.000000 127.191556 35.742444 510.000000 
 127.191667 35.742444 497.000000 127.191667 35.742444 507.000000 
 127.191778 35.742444 488.000000 127.191778 35.742444 502.000000 
 127.191889 35.742444 480.000000 127.191889 35.742444 493.000000 
 127.190889 35.742444 513.000000 127.190889 35.742444 509.000000 
 127.191000 35.742444 513.000000 127.191000 35.742444 510.000000 
 127.191111 35.742444 513.000000 127.191111 35.742444 510.000000 
 127.191222 35.742444 512.000000 127.191222 35.742444 510.000000 
 127.191444 35.742444 508.000000 127.191444 35.742444 510.000000 
 127.191667 35.742444 497.000000 127.191667 35.742444 507.000000 
 127.191778 35.742444 488.000000 127.191778 35.742444 502.000000 
 127.191889 35.742444 480.000000 127.191889 35.742444 493.000000 
 127.192000 35.742444 472.000000 127.192000 35.742444 485.000000 
 127.190889 35.742556 510.000000 127.190889 35.742556 500.000000 
 127.191000 35.742556 510.000000 127.191000 35.742556 502.000000 
 127.191111 35.742556 510.000000 127.191111 35.742556 504.000000 
 127.191222 35.742556 511.000000 127.191222 35.742556 505.000000 
 127.191444 35.742556 510.000000 127.191444 35.742556 507.000000 
 127.191667 35.742556 502.000000 127.191667 35.742556 506.000000 
 127.191778 35.742556 493.000000 127.191778 35.742556 503.000000 
 127.191889 35.742556 485.000000 127.191889 35.742556 498.000000 
 127.192000 35.742556 477.000000 127.192000 35.742556 491.000000 
 127.190889 35.742667 502.000000 127.190889 35.742667 494.000000 
 127.191000 35.742667 504.000000 127.191000 35.742667 495.000000 
 127.191111 35.742667 505.000000 127.191111 35.742667 497.000000 
 127.191222 35.742667 506.000000 127.191222 35.742667 499.000000 
 127.191444 35.742667 507.000000 127.191444 35.742667 503.000000 
 127.191667 35.742667 503.000000 127.191667 35.742667 504.000000 
 127.191778 35.742667 498.000000 127.191778 35.742667 502.000000 
 127.191889 35.742667 491.000000 127.191889 35.742667 499.000000 
 127.192000 35.742667 484.000000 127.192000 35.742667 494.000000 
 127.191000 35.742667 504.000000 127.191000 35.742667 495.000000 
 127.191111 35.742667 505.000000 127.191111 35.742667 497.000000 
 127.191222 35.742667 506.000000 127.191222 35.742667 499.000000 
 127.191333 35.742667 507.000000 127.191333 35.742667 501.000000 
 127.191556 35.742667 506.000000 127.191556 35.742667 504.000000 
 127.191778 35.742667 498.000000 127.191778 35.742667 502.000000 
 127.191889 35.742667 491.000000 127.191889 35.742667 499.000000 
 127.192000 35.742667 484.000000 127.192000 35.742667 494.000000 
 127.192111 35.742667 476.000000 127.192111 35.742667 488.000000 
 127.191000 35.742778 497.000000 127.191000 35.742778 486.000000 
 127.191111 35.742778 499.000000 127.191111 35.742778 488.000000 
 127.191222 35.742778 501.000000 127.191222 35.742778 490.000000 
 127.191333 35.742778 503.000000 127.191333 35.742778 492.000000 
 127.191556 35.742778 504.000000 127.191556 35.742778 496.000000 
 127.191778 35.742778 499.000000 127.191778 35.742778 498.000000 
 127.191889 35.742778 494.000000 127.191889 35.742778 497.000000 
 127.192000 35.742778 488.000000 127.192000 35.742778 495.000000 
 127.192111 35.742778 480.000000 127.192111 35.742778 491.000000 
 127.191000 35.742889 488.000000 127.191000 35.742889 480.000000 
 127.191111 35.742889 490.000000 127.191111 35.742889 482.000000 
 127.191222 35.742889 492.000000 127.191222 35.742889 485.000000 
 127.191333 35.742889 494.000000 127.191333 35.742889 487.000000 
 127.191556 35.742889 497.000000 127.191556 35.742889 490.000000 
 127.191778 35.742889 497.000000 127.191778 35.742889 493.000000 
 127.191889 35.742889 495.000000 127.191889 35.742889 494.000000 
 127.192000 35.742889 491.000000 127.192000 35.742889 494.000000 
 127.192111 35.742889 487.000000 127.192111 35.742889 492.000000 
 127.191111 35.742889 490.000000 127.191111 35.742889 482.000000 
 127.191222 35.742889 492.000000 127.191222 35.742889 485.000000 
 127.191333 35.742889 494.000000 127.191333 35.742889 487.000000 
 127.191444 35.742889 496.000000 127.191444 35.742889 488.000000 
 127.191667 35.742889 498.000000 127.191667 35.742889 492.000000 
 127.191889 35.742889 495.000000 127.191889 35.742889 494.000000 
 127.192000 35.742889 491.000000 127.192000 35.742889 494.000000 
 127.192111 35.742889 487.000000 127.192111 35.742889 492.000000 
 127.192222 35.742889 480.000000 127.192222 35.742889 488.000000 
 127.191111 35.743000 485.000000 127.191111 35.743000 474.000000 
 127.191222 35.743000 487.000000 127.191222 35.743000 477.000000 
 127.191333 35.743000 488.000000 127.191333 35.743000 480.000000 
 127.191444 35.743000 490.000000 127.191444 35.743000 483.000000 
 127.191667 35.743000 493.000000 127.191667 35.743000 486.000000 
 127.191889 35.743000 494.000000 127.191889 35.743000 488.000000 
 127.192000 35.743000 492.000000 127.192000 35.743000 488.000000 
 127.192111 35.743000 488.000000 127.192111 35.743000 488.000000 
 127.192222 35.743000 485.000000 127.192222 35.743000 488.000000 
 127.191111 35.743111 477.000000 127.191111 35.743111 471.000000 
 127.191222 35.743111 480.000000 127.191222 35.743111 473.000000 
 127.191333 35.743111 483.000000 127.191333 35.743111 477.000000 
 127.191444 35.743111 485.000000 127.191444 35.743111 480.000000 
 127.191667 35.743111 487.000000 127.191667 35.743111 484.000000 
 127.191889 35.743111 488.000000 127.191889 35.743111 485.000000 
 127.192000 35.743111 488.000000 127.192000 35.743111 486.000000 
 127.192111 35.743111 488.000000 127.192111 35.743111 486.000000 
 127.192222 35.743111 488.000000 127.192222 35.743111 486.000000 
 127.191222 35.743111 480.000000 127.191222 35.743111 473.000000 
 127.191333 35.743111 483.000000 127.191333 35.743111 477.000000 
 127.191444 35.743111 485.000000 127.191444 35.743111 480.000000 
 127.191556 35.743111 486.000000 127.191556 35.743111 482.000000 
 127.191778 35.743111 488.000000 127.191778 35.743111 485.000000 
 127.192000 35.743111 488.000000 127.192000 35.743111 486.000000 
 127.192111 35.743111 488.000000 127.192111 35.743111 486.000000 
 127.192222 35.743111 488.000000 127.192222 35.743111 486.000000 
 127.192333 35.743111 490.000000 127.192333 35.743111 488.000000 
 127.191222 35.743222 477.000000 127.191222 35.743222 468.000000 
 127.191333 35.743222 480.000000 127.191333 35.743222 471.000000 
 127.191444 35.743222 482.000000 127.191444 35.743222 474.000000 
 127.191556 35.743222 484.000000 127.191556 35.743222 478.000000 
 127.191778 35.743222 485.000000 127.191778 35.743222 480.000000 
 127.192000 35.743222 486.000000 127.192000 35.743222 482.000000 
 127.192111 35.743222 486.000000 127.192111 35.743222 483.000000 
 127.192222 35.743222 488.000000 127.192222 35.743222 484.000000 
 127.192333 35.743222 490.000000 127.192333 35.743222 486.000000 
 127.191222 35.743333 471.000000 127.191222 35.743333 465.000000 
 127.191333 35.743333 474.000000 127.191333 35.743333 468.000000 
 127.191444 35.743333 478.000000 127.191444 35.743333 470.000000 
 127.191556 35.743333 480.000000 127.191556 35.743333 472.000000 
 127.191778 35.743333 481.000000 127.191778 35.743333 476.000000 
 127.192000 35.743333 483.000000 127.192000 35.743333 478.000000 
 127.192111 35.743333 484.000000 127.192111 35.743333 480.000000 
 127.192222 35.743333 486.000000 127.192222 35.743333 482.000000 
 127.192333 35.743333 487.000000 127.192333 35.743333 483.000000 
 127.191333 35.743333 474.000000 127.191333 35.743333 468.000000 
 127.191444 35.743333 478.000000 127.191444 35.743333 470.000000 
 127.191556 35.743333 480.000000 127.191556 35.743333 472.000000 
 127.191667 35.743333 480.000000 127.191667 35.743333 474.000000 
 127.191889 35.743333 482.000000 127.191889 35.743333 477.000000 
 127.192111 35.743333 484.000000 127.192111 35.743333 480.000000 
 127.192222 35.743333 486.000000 127.192222 35.743333 482.000000 
 127.192333 35.743333 487.000000 127.192333 35.743333 483.000000 
 127.192444 35.743333 489.000000 127.192444 35.743333 485.000000 
 127.191333 35.743444 470.000000 127.191333 35.743444 464.000000 
 127.191444 35.743444 472.000000 127.191444 35.743444 466.000000 
 127.191556 35.743444 474.000000 127.191556 35.743444 467.000000 
 127.191667 35.743444 476.000000 127.191667 35.743444 464.000000 
 127.191889 35.743444 478.000000 127.191889 35.743444 468.000000 
 127.192111 35.743444 482.000000 127.192111 35.743444 472.000000 
 127.192222 35.743444 483.000000 127.192222 35.743444 474.000000 
 127.192333 35.743444 485.000000 127.192333 35.743444 479.000000 
 127.192444 35.743444 486.000000 127.192444 35.743444 481.000000 
 127.191333 35.743556 466.000000 127.191333 35.743556 458.000000 
 127.191444 35.743556 467.000000 127.191444 35.743556 459.000000 
 127.191556 35.743556 464.000000 127.191556 35.743556 459.000000 
 127.191667 35.743556 466.000000 127.191667 35.743556 458.000000 
 127.191889 35.743556 470.000000 127.191889 35.743556 462.000000 
 127.192111 35.743556 474.000000 127.192111 35.743556 466.000000 
 127.192222 35.743556 479.000000 127.192222 35.743556 469.000000 
 127.192333 35.743556 481.000000 127.192333 35.743556 471.000000 
 127.192444 35.743556 482.000000 127.192444 35.743556 474.000000 
 127.191444 35.743556 467.000000 127.191444 35.743556 459.000000 
 127.191556 35.743556 464.000000 127.191556 35.743556 459.000000 
 127.191667 35.743556 466.000000 127.191667 35.743556 458.000000 
 127.191778 35.743556 468.000000 127.191778 35.743556 459.000000 
 127.192000 35.743556 472.000000 127.192000 35.743556 464.000000 
 127.192222 35.743556 479.000000 127.192222 35.743556 469.000000 
 127.192333 35.743556 481.000000 127.192333 35.743556 471.000000 
 127.192444 35.743556 482.000000 127.192444 35.743556 474.000000 
 127.192556 35.743556 484.000000 127.192556 35.743556 480.000000 
 127.191444 35.743667 459.000000 127.191444 35.743667 455.000000 
 127.191556 35.743667 458.000000 127.191556 35.743667 454.000000 
 127.191667 35.743667 459.000000 127.191667 35.743667 453.000000 
 127.191778 35.743667 462.000000 127.191778 35.743667 453.000000 
 127.192000 35.743667 466.000000 127.192000 35.743667 458.000000 
 127.192222 35.743667 471.000000 127.192222 35.743667 464.000000 
 127.192333 35.743667 474.000000 127.192333 35.743667 467.000000 
 127.192444 35.743667 480.000000 127.192444 35.743667 469.000000 
 127.192556 35.743667 481.000000 127.192556 35.743667 472.000000 
 127.191444 35.743778 454.000000 127.191444 35.743778 447.000000 
 127.191556 35.743778 453.000000 127.191556 35.743778 445.000000 
 127.191667 35.743778 453.000000 127.191667 35.743778 444.000000 
 127.191778 35.743778 455.000000 127.191778 35.743778 443.000000 
 127.192000 35.743778 461.000000 127.192000 35.743778 449.000000 
 127.192222 35.743778 467.000000 127.192222 35.743778 456.000000 
 127.192333 35.743778 469.000000 127.192333 35.743778 459.000000 
 127.192444 35.743778 472.000000 127.192444 35.743778 462.000000 
 127.192556 35.743778 475.000000 127.192556 35.743778 465.000000 
 127.191556 35.743778 453.000000 127.191556 35.743778 445.000000 
 127.191667 35.743778 453.000000 127.191667 35.743778 444.000000 
 127.191778 35.743778 455.000000 127.191778 35.743778 443.000000 
 127.191889 35.743778 458.000000 127.191889 35.743778 446.000000 
 127.192111 35.743778 464.000000 127.192111 35.743778 453.000000 
 127.192333 35.743778 469.000000 127.192333 35.743778 459.000000 
 127.192444 35.743778 472.000000 127.192444 35.743778 462.000000 
 127.192556 35.743778 475.000000 127.192556 35.743778 465.000000 
 127.192667 35.743778 480.000000 127.192667 35.743778 469.000000 
 127.191556 35.743889 444.000000 127.191556 35.743889 437.000000 
 127.191667 35.743889 443.000000 127.191667 35.743889 437.000000 
 127.191778 35.743889 446.000000 127.191778 35.743889 437.000000 
 127.191889 35.743889 449.000000 127.191889 35.743889 440.000000 
 127.192111 35.743889 456.000000 127.192111 35.743889 447.000000 
 127.192333 35.743889 462.000000 127.192333 35.743889 454.000000 
 127.192444 35.743889 465.000000 127.192444 35.743889 457.000000 
 127.192556 35.743889 469.000000 127.192556 35.743889 461.000000 
 127.192667 35.743889 472.000000 127.192667 35.743889 464.000000 
 127.191556 35.744000 437.000000 127.191556 35.744000 425.000000 
 127.191667 35.744000 437.000000 127.191667 35.744000 425.000000 
 127.191778 35.744000 440.000000 127.191778 35.744000 428.000000 
 127.191889 35.744000 444.000000 127.191889 35.744000 431.000000 
 127.192111 35.744000 451.000000 127.192111 35.744000 439.000000 
 127.192333 35.744000 457.000000 127.192333 35.744000 447.000000 
 127.192444 35.744000 461.000000 127.192444 35.744000 450.000000 
 127.192556 35.744000 464.000000 127.192556 35.744000 454.000000 
 127.192667 35.744000 468.000000 127.192667 35.744000 458.000000 
 127.191667 35.744000 437.000000 127.191667 35.744000 425.000000 
 127.191778 35.744000 440.000000 127.191778 35.744000 428.000000 
 127.191889 35.744000 444.000000 127.191889 35.744000 431.000000 
 127.192000 35.744000 447.000000 127.192000 35.744000 435.000000 
 127.192222 35.744000 454.000000 127.192222 35.744000 443.000000 
 127.192444 35.744000 461.000000 127.192444 35.744000 450.000000 
 127.192556 35.744000 464.000000 127.192556 35.744000 454.000000 
 127.192667 35.744000 468.000000 127.192667 35.744000 458.000000 
 127.192778 35.744000 472.000000 127.192778 35.744000 462.000000 
 127.191667 35.744111 428.000000 127.191667 35.744111 420.000000 
 127.191778 35.744111 431.000000 127.191778 35.744111 422.000000 
 127.191889 35.744111 435.000000 127.191889 35.744111 425.000000 
 127.192000 35.744111 439.000000 127.192000 35.744111 430.000000 
 127.192222 35.744111 447.000000 127.192222 35.744111 438.000000 
 127.192444 35.744111 454.000000 127.192444 35.744111 446.000000 
 127.192556 35.744111 458.000000 127.192556 35.744111 450.000000 
 127.192667 35.744111 462.000000 127.192667 35.744111 455.000000 
 127.192778 35.744111 467.000000 127.192778 35.744111 460.000000 
 127.191667 35.744222 422.000000 127.191667 35.744222 413.000000 
 127.191778 35.744222 425.000000 127.191778 35.744222 416.000000 
 127.191889 35.744222 430.000000 127.191889 35.744222 419.000000 
 127.192000 35.744222 434.000000 127.192000 35.744222 422.000000 
 127.192222 35.744222 442.000000 127.192222 35.744222 432.000000 
 127.192444 35.744222 450.000000 127.192444 35.744222 441.000000 
 127.192556 35.744222 455.000000 127.192556 35.744222 447.000000 
 127.192667 35.744222 460.000000 127.192667 35.744222 452.000000 
 127.192778 35.744222 463.000000 127.192778 35.744222 457.000000 
 127.191778 35.744222 425.000000 127.191778 35.744222 416.000000 
 127.191889 35.744222 430.000000 127.191889 35.744222 419.000000 
 127.192000 35.744222 434.000000 127.192000 35.744222 422.000000 
 127.192111 35.744222 438.000000 127.192111 35.744222 426.000000 
 127.192333 35.744222 446.000000 127.192333 35.744222 436.000000 
 127.192556 35.744222 455.000000 127.192556 35.744222 447.000000 
 127.192667 35.744222 460.000000 127.192667 35.744222 452.000000 
 127.192778 35.744222 463.000000 127.192778 35.744222 457.000000 
 127.192889 35.744222 468.000000 127.192889 35.744222 460.000000 
 127.191778 35.744333 419.000000 127.191778 35.744333 411.000000 
 127.191889 35.744333 422.000000 127.191889 35.744333 414.000000 
 127.192000 35.744333 426.000000 127.192000 35.744333 419.000000 
 127.192111 35.744333 432.000000 127.192111 35.744333 423.000000 
 127.192333 35.744333 441.000000 127.192333 35.744333 434.000000 
 127.192556 35.744333 452.000000 127.192556 35.744333 447.000000 
 127.192667 35.744333 457.000000 127.192667 35.744333 452.000000 
 127.192778 35.744333 460.000000 127.192778 35.744333 456.000000 
 127.192889 35.744333 463.000000 127.192889 35.744333 459.000000 
 127.191778 35.744444 414.000000 127.191778 35.744444 405.000000 
 127.191889 35.744444 419.000000 127.191889 35.744444 410.000000 
 127.192000 35.744444 423.000000 127.192000 35.744444 415.000000 
 127.192111 35.744444 428.000000 127.192111 35.744444 420.000000 
 127.192333 35.744444 440.000000 127.192333 35.744444 433.000000 
 127.192556 35.744444 452.000000 127.192556 35.744444 447.000000 
 127.192667 35.744444 456.000000 127.192667 35.744444 452.000000 
 127.192778 35.744444 459.000000 127.192778 35.744444 455.000000 
 127.192889 35.744444 462.000000 127.192889 35.744444 458.000000 
 127.191889 35.744444 419.000000 127.191889 35.744444 410.000000 
 127.192000 35.744444 423.000000 127.192000 35.744444 415.000000 
 127.192111 35.744444 428.000000 127.192111 35.744444 420.000000 
 127.192222 35.744444 434.000000 127.192222 35.744444 426.000000 
 127.192444 35.744444 447.000000 127.192444 35.744444 440.000000 
 127.192667 35.744444 456.000000 127.192667 35.744444 452.000000 
 127.192778 35.744444 459.000000 127.192778 35.744444 455.000000 
 127.192889 35.744444 462.000000 127.192889 35.744444 458.000000 
 127.193000 35.744444 466.000000 127.193000 35.744444 461.000000 
 127.191889 35.744556 415.000000 127.191889 35.744556 409.000000 
 127.192000 35.744556 420.000000 127.192000 35.744556 414.000000 
 127.192111 35.744556 426.000000 127.192111 35.744556 420.000000 
 127.192222 35.744556 433.000000 127.192222 35.744556 425.000000 
 127.192444 35.744556 447.000000 127.192444 35.744556 441.000000 
 127.192667 35.744556 455.000000 127.192667 35.744556 452.000000 
 127.192778 35.744556 458.000000 127.192778 35.744556 455.000000 
 127.192889 35.744556 461.000000 127.192889 35.744556 458.000000 
 127.193000 35.744556 464.000000 127.193000 35.744556 461.000000 
 127.191889 35.744667 414.000000 127.191889 35.744667 409.000000 
 127.192000 35.744667 420.000000 127.192000 35.744667 415.000000 
 127.192111 35.744667 425.000000 127.192111 35.744667 420.000000 
 127.192222 35.744667 433.000000 127.192222 35.744667 426.000000 
 127.192444 35.744667 448.000000 127.192444 35.744667 441.000000 
 127.192667 35.744667 455.000000 127.192667 35.744667 451.000000 
 127.192778 35.744667 458.000000 127.192778 35.744667 454.000000 
 127.192889 35.744667 461.000000 127.192889 35.744667 457.000000 
 127.193000 35.744667 464.000000 127.193000 35.744667 461.000000 
 127.192000 35.744778 420.000000 127.192000 35.744778 415.000000 
 127.192111 35.744778 426.000000 127.192111 35.744778 421.000000 
 127.192222 35.744778 434.000000 127.192222 35.744778 427.000000 
 127.192333 35.744778 441.000000 127.192333 35.744778 434.000000 
 127.192556 35.744778 451.000000 127.192556 35.744778 449.000000 
 127.192778 35.744778 457.000000 127.192778 35.744778 454.000000 
 127.192889 35.744778 461.000000 127.192889 35.744778 457.000000 
 127.193000 35.744778 464.000000 127.193000 35.744778 461.000000 
 127.193111 35.744778 466.000000 127.193111 35.744778 465.000000 
 127.192000 35.744889 421.000000 127.192000 35.744889 416.000000 
 127.192111 35.744889 427.000000 127.192111 35.744889 421.000000 
 127.192222 35.744889 434.000000 127.192222 35.744889 427.000000 
 127.192333 35.744889 441.000000 127.192333 35.744889 435.000000 
 127.192556 35.744889 451.000000 127.192556 35.744889 449.000000 
 127.192778 35.744889 457.000000 127.192778 35.744889 454.000000 
 127.192889 35.744889 461.000000 127.192889 35.744889 458.000000 
 127.193000 35.744889 465.000000 127.193000 35.744889 463.000000 
 127.193111 35.744889 467.000000 127.193111 35.744889 468.000000 
 127.192000 35.745000 421.000000 127.192000 35.745000 417.000000 
 127.192111 35.745000 427.000000 127.192111 35.745000 422.000000 
 127.192222 35.745000 435.000000 127.192222 35.745000 428.000000 
 127.192333 35.745000 442.000000 127.192333 35.745000 436.000000 
 127.192556 35.745000 452.000000 127.192556 35.745000 449.000000 
 127.192778 35.745000 458.000000 127.192778 35.745000 454.000000 
 127.192889 35.745000 463.000000 127.192889 35.745000 459.000000 
 127.193000 35.745000 468.000000 127.193000 35.745000 465.000000 
 127.193111 35.745000 468.000000 127.193111 35.745000 470.000000 
 127.192111 35.745000 427.000000 127.192111 35.745000 422.000000 
 127.192222 35.745000 435.000000 127.192222 35.745000 428.000000 
 127.192333 35.745000 442.000000 127.192333 35.745000 436.000000 
 127.192444 35.745000 449.000000 127.192444 35.745000 443.000000 
 127.192667 35.745000 454.000000 127.192667 35.745000 452.000000 
 127.192889 35.745000 463.000000 127.192889 35.745000 459.000000 
 127.193000 35.745000 468.000000 127.193000 35.745000 465.000000 
 127.193111 35.745000 468.000000 127.193111 35.745000 470.000000 
 127.193222 35.745000 465.000000 127.193222 35.745000 470.000000 
 127.192111 35.745111 428.000000 127.192111 35.745111 423.000000 
 127.192222 35.745111 436.000000 127.192222 35.745111 430.000000 
 127.192333 35.745111 443.000000 127.192333 35.745111 437.000000 
 127.192444 35.745111 449.000000 127.192444 35.745111 443.000000 
 127.192667 35.745111 454.000000 127.192667 35.745111 452.000000 
 127.192889 35.745111 465.000000 127.192889 35.745111 462.000000 
 127.193000 35.745111 470.000000 127.193000 35.745111 467.000000 
 127.193111 35.745111 470.000000 127.193111 35.745111 470.000000 
 127.193222 35.745111 465.000000 127.193222 35.745111 470.000000 
 127.192111 35.745222 430.000000 127.192111 35.745222 426.000000 
 127.192222 35.745222 437.000000 127.192222 35.745222 432.000000 
 127.192333 35.745222 443.000000 127.192333 35.745222 438.000000 
 127.192444 35.745222 449.000000 127.192444 35.745222 444.000000 
 127.192667 35.745222 456.000000 127.192667 35.745222 453.000000 
 127.192889 35.745222 467.000000 127.192889 35.745222 464.000000 
 127.193000 35.745222 470.000000 127.193000 35.745222 468.000000 
 127.193111 35.745222 470.000000 127.193111 35.745222 470.000000 
 127.193222 35.745222 465.000000 127.193222 35.745222 470.000000 
 127.192222 35.745222 437.000000 127.192222 35.745222 432.000000 
 127.192333 35.745222 443.000000 127.192333 35.745222 438.000000 
 127.192444 35.745222 449.000000 127.192444 35.745222 444.000000 
 127.192556 35.745222 452.000000 127.192556 35.745222 450.000000 
 127.192778 35.745222 462.000000 127.192778 35.745222 458.000000 
 127.193000 35.745222 470.000000 127.193000 35.745222 468.000000 
 127.193111 35.745222 470.000000 127.193111 35.745222 470.000000 
 127.193222 35.745222 465.000000 127.193222 35.745222 470.000000 
 127.193333 35.745222 458.000000 127.193333 35.745222 464.000000 
 127.192222 35.745333 438.000000 127.192222 35.745333 434.000000 
 127.192333 35.745333 444.000000 127.192333 35.745333 439.000000 
 127.192444 35.745333 450.000000 127.192444 35.745333 445.000000 
 127.192556 35.745333 453.000000 127.192556 35.745333 450.000000 
 127.192778 35.745333 464.000000 127.192778 35.745333 460.000000 
 127.193000 35.745333 470.000000 127.193000 35.745333 469.000000 
 127.193111 35.745333 470.000000 127.193111 35.745333 471.000000 
 127.193222 35.745333 464.000000 127.193222 35.745333 469.000000 
 127.193333 35.745333 458.000000 127.193333 35.745333 463.000000 
 127.192222 35.745444 439.000000 127.192222 35.745444 436.000000 
 127.192333 35.745444 445.000000 127.192333 35.745444 442.000000 
 127.192444 35.745444 450.000000 127.192444 35.745444 448.000000 
 127.192556 35.745444 455.000000 127.192556 35.745444 453.000000 
 127.192778 35.745444 465.000000 127.192778 35.745444 463.000000 
 127.193000 35.745444 471.000000 127.193000 35.745444 470.000000 
 127.193111 35.745444 469.000000 127.193111 35.745444 470.000000 
 127.193222 35.745444 463.000000 127.193222 35.745444 467.000000 
 127.193333 35.745444 456.000000 127.193333 35.745444 459.000000 
 127.192333 35.745444 445.000000 127.192333 35.745444 442.000000 
 127.192444 35.745444 450.000000 127.192444 35.745444 448.000000 
 127.192556 35.745444 455.000000 127.192556 35.745444 453.000000 
 127.192667 35.745444 460.000000 127.192667 35.745444 458.000000 
 127.192889 35.745444 469.000000 127.192889 35.745444 467.000000 
 127.193111 35.745444 469.000000 127.193111 35.745444 470.000000 
 127.193222 35.745444 463.000000 127.193222 35.745444 467.000000 
 127.193333 35.745444 456.000000 127.193333 35.745444 459.000000 
 127.193444 35.745444 450.000000 127.193444 35.745444 452.000000 
 127.192333 35.745556 448.000000 127.192333 35.745556 443.000000 
 127.192444 35.745556 453.000000 127.192444 35.745556 450.000000 
 127.192556 35.745556 458.000000 127.192556 35.745556 455.000000 
 127.192667 35.745556 463.000000 127.192667 35.745556 460.000000 
 127.192889 35.745556 470.000000 127.192889 35.745556 469.000000 
 127.193111 35.745556 467.000000 127.193111 35.745556 470.000000 
 127.193222 35.745556 459.000000 127.193222 35.745556 465.000000 
 127.193333 35.745556 452.000000 127.193333 35.745556 454.000000 
 127.193444 35.745556 443.000000 127.193444 35.745556 447.000000 
 127.192333 35.745667 450.000000 127.192333 35.745667 445.000000 
 127.192444 35.745667 455.000000 127.192444 35.745667 452.000000 
 127.192556 35.745667 460.000000 127.192556 35.745667 457.000000 
 127.192667 35.745667 465.000000 127.192667 35.745667 463.000000 
 127.192889 35.745667 470.000000 127.192889 35.745667 471.000000 
 127.193111 35.745667 465.000000 127.193111 35.745667 467.000000 
 127.193222 35.745667 454.000000 127.193222 35.745667 458.000000 
 127.193333 35.745667 447.000000 127.193333 35.745667 447.000000 
 127.193444 35.745667 439.000000 127.193444 35.745667 441.000000 
 127.192444 35.745667 455.000000 127.192444 35.745667 452.000000 
 127.192556 35.745667 460.000000 127.192556 35.745667 457.000000 
 127.192667 35.745667 465.000000 127.192667 35.745667 463.000000 
 127.192778 35.745667 469.000000 127.192778 35.745667 468.000000 
 127.193000 35.745667 470.000000 127.193000 35.745667 470.000000 
 127.193222 35.745667 454.000000 127.193222 35.745667 458.000000 
 127.193333 35.745667 447.000000 127.193333 35.745667 447.000000 
 127.193444 35.745667 439.000000 127.193444 35.745667 441.000000 
 127.193556 35.745667 430.000000 127.193556 35.745667 434.000000 
 127.192444 35.745778 457.000000 127.192444 35.745778 453.000000 
 127.192556 35.745778 463.000000 127.192556 35.745778 459.000000 
 127.192667 35.745778 468.000000 127.192667 35.745778 465.000000 
 127.192778 35.745778 471.000000 127.192778 35.745778 470.000000 
 127.193000 35.745778 467.000000 127.193000 35.745778 472.000000 
 127.193222 35.745778 447.000000 127.193222 35.745778 455.000000 
 127.193333 35.745778 441.000000 127.193333 35.745778 446.000000 
 127.193444 35.745778 434.000000 127.193444 35.745778 440.000000 
 127.193556 35.745778 426.000000 127.193556 35.745778 433.000000 
 127.192444 35.745889 459.000000 127.192444 35.745889 456.000000 
 127.192556 35.745889 465.000000 127.192556 35.745889 463.000000 
 127.192667 35.745889 470.000000 127.192667 35.745889 470.000000 
 127.192778 35.745889 475.000000 127.192778 35.745889 477.000000 
 127.193000 35.745889 466.000000 127.193000 35.745889 476.000000 
 127.193222 35.745889 446.000000 127.193222 35.745889 460.000000 
 127.193333 35.745889 440.000000 127.193333 35.745889 451.000000 
 127.193444 35.745889 433.000000 127.193444 35.745889 444.000000 
 127.193556 35.745889 426.000000 127.193556 35.745889 437.000000 
 127.192556 35.745889 465.000000 127.192556 35.745889 463.000000 
 127.192667 35.745889 470.000000 127.192667 35.745889 470.000000 
 127.192778 35.745889 475.000000 127.192778 35.745889 477.000000 
 127.192889 35.745889 472.000000 127.192889 35.745889 479.000000 
 127.193111 35.745889 455.000000 127.193111 35.745889 469.000000 
 127.193333 35.745889 440.000000 127.193333 35.745889 451.000000 
 127.193444 35.745889 433.000000 127.193444 35.745889 444.000000 
 127.193556 35.745889 426.000000 127.193556 35.745889 437.000000 
 127.193667 35.745889 417.000000 127.193667 35.745889 431.000000 
 127.192556 35.746000 470.000000 127.192556 35.746000 467.000000 
 127.192667 35.746000 477.000000 127.192667 35.746000 474.000000 
 127.192778 35.746000 479.000000 127.192778 35.746000 480.000000 
 127.192889 35.746000 476.000000 127.192889 35.746000 483.000000 
 127.193111 35.746000 460.000000 127.193111 35.746000 475.000000 
 127.193333 35.746000 444.000000 127.193333 35.746000 456.000000 
 127.193444 35.746000 437.000000 127.193444 35.746000 447.000000 
 127.193556 35.746000 431.000000 127.193556 35.746000 441.000000 
 127.193667 35.746000 423.000000 127.193667 35.746000 435.000000 
 127.192556 35.746111 474.000000 127.192556 35.746111 476.000000 
 127.192667 35.746111 480.000000 127.192667 35.746111 481.000000 
 127.192778 35.746111 483.000000 127.192778 35.746111 486.000000 
 127.192889 35.746111 480.000000 127.192889 35.746111 488.000000 
 127.193111 35.746111 466.000000 127.193111 35.746111 479.000000 
 127.193333 35.746111 447.000000 127.193333 35.746111 463.000000 
 127.193444 35.746111 441.000000 127.193444 35.746111 454.000000 
 127.193556 35.746111 435.000000 127.193556 35.746111 446.000000 
 127.193667 35.746111 428.000000 127.193667 35.746111 440.000000 
 127.192667 35.746111 480.000000 127.192667 35.746111 481.000000 
 127.192778 35.746111 483.000000 127.192778 35.746111 486.000000 
 127.192889 35.746111 480.000000 127.192889 35.746111 488.000000 
 127.193000 35.746111 475.000000 127.193000 35.746111 484.000000 
 127.193222 35.746111 456.000000 127.193222 35.746111 475.000000 
 127.193444 35.746111 441.000000 127.193444 35.746111 454.000000 
 127.193556 35.746111 435.000000 127.193556 35.746111 446.000000 
 127.193667 35.746111 428.000000 127.193667 35.746111 440.000000 
 127.193778 35.746111 422.000000 127.193778 35.746111 435.000000 
 127.192667 35.746222 486.000000 127.192667 35.746222 487.000000 
 127.192778 35.746222 488.000000 127.192778 35.746222 490.000000 
 127.192889 35.746222 484.000000 127.192889 35.746222 492.000000 
 127.193000 35.746222 479.000000 127.193000 35.746222 488.000000 
 127.193222 35.746222 463.000000 127.193222 35.746222 476.000000 
 127.193444 35.746222 446.000000 127.193444 35.746222 457.000000 
 127.193556 35.746222 440.000000 127.193556 35.746222 449.000000 
 127.193667 35.746222 435.000000 127.193667 35.746222 443.000000 
 127.193778 35.746222 430.000000 127.193778 35.746222 437.000000 
 127.192667 35.746333 490.000000 127.192667 35.746333 498.000000 
 127.192778 35.746333 492.000000 127.192778 35.746333 501.000000 
 127.192889 35.746333 488.000000 127.192889 35.746333 498.000000 
 127.193000 35.746333 482.000000 127.193000 35.746333 492.000000 
 127.193222 35.746333 467.000000 127.193222 35.746333 477.000000 
 127.193444 35.746333 449.000000 127.193444 35.746333 458.000000 
 127.193556 35.746333 443.000000 127.193556 35.746333 449.000000 
 127.193667 35.746333 437.000000 127.193667 35.746333 441.000000 
 127.193778 35.746333 431.000000 127.193778 35.746333 434.000000 
 127.192778 35.746333 492.000000 127.192778 35.746333 501.000000 
 127.192889 35.746333 488.000000 127.192889 35.746333 498.000000 
 127.193000 35.746333 482.000000 127.193000 35.746333 492.000000 
 127.193111 35.746333 476.000000 127.193111 35.746333 485.000000 
 127.193333 35.746333 457.000000 127.193333 35.746333 468.000000 
 127.193556 35.746333 443.000000 127.193556 35.746333 449.000000 
 127.193667 35.746333 437.000000 127.193667 35.746333 441.000000 
 127.193778 35.746333 431.000000 127.193778 35.746333 434.000000 
 127.193889 35.746333 426.000000 127.193889 35.746333 426.000000 
 127.192778 35.746444 498.000000 127.192778 35.746444 505.000000 
 127.192889 35.746444 492.000000 127.192889 35.746444 501.000000 
 127.193000 35.746444 485.000000 127.193000 35.746444 493.000000 
 127.193111 35.746444 477.000000 127.193111 35.746444 486.000000 
 127.193333 35.746444 458.000000 127.193333 35.746444 468.000000 
 127.193556 35.746444 441.000000 127.193556 35.746444 448.000000 
 127.193667 35.746444 434.000000 127.193667 35.746444 439.000000 
 127.193778 35.746444 426.000000 127.193778 35.746444 430.000000 
 127.193889 35.746444 419.000000 127.193889 35.746444 421.000000 
 127.192778 35.746556 501.000000 127.192778 35.746556 505.000000 
 127.192889 35.746556 493.000000 127.192889 35.746556 505.000000 
 127.193000 35.746556 486.000000 127.193000 35.746556 496.000000 
 127.193111 35.746556 478.000000 127.193111 35.746556 487.000000 
 127.193333 35.746556 457.000000 127.193333 35.746556 469.000000 
 127.193556 35.746556 439.000000 127.193556 35.746556 446.000000 
 127.193667 35.746556 430.000000 127.193667 35.746556 436.000000 
 127.193778 35.746556 421.000000 127.193778 35.746556 425.000000 
 127.193889 35.746556 413.000000 127.193889 35.746556 414.000000 
 127.192889 35.746556 493.000000 127.192889 35.746556 505.000000 
 127.193000 35.746556 486.000000 127.193000 35.746556 496.000000 
 127.193111 35.746556 478.000000 127.193111 35.746556 487.000000 
 127.193222 35.746556 468.000000 127.193222 35.746556 479.000000 
 127.193444 35.746556 448.000000 127.193444 35.746556 457.000000 
 127.193667 35.746556 430.000000 127.193667 35.746556 436.000000 
 127.193778 35.746556 421.000000 127.193778 35.746556 425.000000 
 127.193889 35.746556 413.000000 127.193889 35.746556 414.000000 
 127.194000 35.746556 406.000000 127.194000 35.746556 402.000000 
 127.192889 35.746667 496.000000 127.192889 35.746667 505.000000 
 127.193000 35.746667 487.000000 127.193000 35.746667 498.000000 
 127.193111 35.746667 479.000000 127.193111 35.746667 489.000000 
 127.193222 35.746667 469.000000 127.193222 35.746667 480.000000 
 127.193444 35.746667 446.000000 127.193444 35.746667 456.000000 
 127.193667 35.746667 425.000000 127.193667 35.746667 435.000000 
 127.193778 35.746667 414.000000 127.193778 35.746667 424.000000 
 127.193889 35.746667 402.000000 127.193889 35.746667 414.000000 
 127.194000 35.746667 396.000000 127.194000 35.746667 403.000000 
 127.192889 35.746778 498.000000 127.192889 35.746778 500.000000 
 127.193000 35.746778 489.000000 127.193000 35.746778 500.000000 
 127.193111 35.746778 480.000000 127.193111 35.746778 491.000000 
 127.193222 35.746778 469.000000 127.193222 35.746778 481.000000 
 127.193444 35.746778 445.000000 127.193444 35.746778 456.000000 
 127.193667 35.746778 424.000000 127.193667 35.746778 434.000000 
 127.193778 35.746778 414.000000 127.193778 35.746778 423.000000 
 127.193889 35.746778 403.000000 127.193889 35.746778 415.000000 
 127.194000 35.746778 396.000000 127.194000 35.746778 408.000000 
 127.193000 35.746778 489.000000 127.193000 35.746778 500.000000 
 127.193111 35.746778 480.000000 127.193111 35.746778 491.000000 
 127.193222 35.746778 469.000000 127.193222 35.746778 481.000000 
 127.193333 35.746778 456.000000 127.193333 35.746778 470.000000 
 127.193556 35.746778 435.000000 127.193556 35.746778 444.000000 
 127.193778 35.746778 414.000000 127.193778 35.746778 423.000000 
 127.193889 35.746778 403.000000 127.193889 35.746778 415.000000 
 127.194000 35.746778 396.000000 127.194000 35.746778 408.000000 
 127.194111 35.746778 389.000000 127.194111 35.746778 401.000000 
 127.193000 35.746889 491.000000 127.193000 35.746889 500.000000 
 127.193111 35.746889 481.000000 127.193111 35.746889 493.000000 
 127.193222 35.746889 470.000000 127.193222 35.746889 482.000000 
 127.193333 35.746889 456.000000 127.193333 35.746889 471.000000 
 127.193556 35.746889 434.000000 127.193556 35.746889 445.000000 
 127.193778 35.746889 415.000000 127.193778 35.746889 426.000000 
 127.193889 35.746889 408.000000 127.193889 35.746889 419.000000 
 127.194000 35.746889 401.000000 127.194000 35.746889 413.000000 
 127.194111 35.746889 395.000000 127.194111 35.746889 407.000000 
 127.193000 35.747000 493.000000 127.193000 35.747000 501.000000 
 127.193111 35.747000 482.000000 127.193111 35.747000 494.000000 
 127.193222 35.747000 471.000000 127.193222 35.747000 483.000000 
 127.193333 35.747000 457.000000 127.193333 35.747000 471.000000 
 127.193556 35.747000 435.000000 127.193556 35.747000 446.000000 
 127.193778 35.747000 419.000000 127.193778 35.747000 432.000000 
 127.193889 35.747000 413.000000 127.193889 35.747000 424.000000 
 127.194000 35.747000 407.000000 127.194000 35.747000 420.000000 
 127.194111 35.747000 399.000000 127.194111 35.747000 414.000000 
 127.193111 35.747000 482.000000 127.193111 35.747000 494.000000 
 127.193222 35.747000 471.000000 127.193222 35.747000 483.000000 
 127.193333 35.747000 457.000000 127.193333 35.747000 471.000000 
 127.193444 35.747000 445.000000 127.193444 35.747000 458.000000 
 127.193667 35.747000 426.000000 127.193667 35.747000 438.000000 
 127.193889 35.747000 413.000000 127.193889 35.747000 424.000000 
 127.194000 35.747000 407.000000 127.194000 35.747000 420.000000 
 127.194111 35.747000 399.000000 127.194111 35.747000 414.000000 
 127.194222 35.747000 394.000000 127.194222 35.747000 408.000000 
 127.193111 35.747111 483.000000 127.193111 35.747111 497.000000 
 127.193222 35.747111 471.000000 127.193222 35.747111 486.000000 
 127.193333 35.747111 458.000000 127.193333 35.747111 474.000000 
 127.193444 35.747111 446.000000 127.193444 35.747111 463.000000 
 127.193667 35.747111 432.000000 127.193667 35.747111 449.000000 
 127.193889 35.747111 420.000000 127.193889 35.747111 438.000000 
 127.194000 35.747111 414.000000 127.194000 35.747111 432.000000 
 127.194111 35.747111 408.000000 127.194111 35.747111 426.000000 
 127.194222 35.747111 402.000000 127.194222 35.747111 419.000000 
 127.193111 35.747222 486.000000 127.193111 35.747222 500.000000 
 127.193222 35.747222 474.000000 127.193222 35.747222 490.000000 
 127.193333 35.747222 463.000000 127.193333 35.747222 480.000000 
 127.193444 35.747222 455.000000 127.193444 35.747222 470.000000 
 127.193667 35.747222 444.000000 127.193667 35.747222 459.000000 
 127.193889 35.747222 432.000000 127.193889 35.747222 448.000000 
 127.194000 35.747222 426.000000 127.194000 35.747222 439.000000 
 127.194111 35.747222 419.000000 127.194111 35.747222 432.000000 
 127.194222 35.747222 413.000000 127.194222 35.747222 425.000000 
 127.193222 35.747222 474.000000 127.193222 35.747222 490.000000 
 127.193333 35.747222 463.000000 127.193333 35.747222 480.000000 
 127.193444 35.747222 455.000000 127.193444 35.747222 470.000000 
 127.193556 35.747222 449.000000 127.193556 35.747222 464.000000 
 127.193778 35.747222 438.000000 127.193778 35.747222 454.000000 
 127.194000 35.747222 426.000000 127.194000 35.747222 439.000000 
 127.194111 35.747222 419.000000 127.194111 35.747222 432.000000 
 127.194222 35.747222 413.000000 127.194222 35.747222 425.000000 
 127.194333 35.747222 409.000000 127.194333 35.747222 418.000000 
 127.193222 35.747333 480.000000 127.193222 35.747333 499.000000 
 127.193333 35.747333 470.000000 127.193333 35.747333 491.000000 
 127.193444 35.747333 464.000000 127.193444 35.747333 484.000000 
 127.193556 35.747333 459.000000 127.193556 35.747333 477.000000 
 127.193778 35.747333 448.000000 127.193778 35.747333 462.000000 
 127.194000 35.747333 432.000000 127.194000 35.747333 444.000000 
 127.194111 35.747333 425.000000 127.194111 35.747333 436.000000 
 127.194222 35.747333 418.000000 127.194222 35.747333 428.000000 
 127.194333 35.747333 412.000000 127.194333 35.747333 421.000000 
 127.193222 35.747444 491.000000 127.193222 35.747444 504.000000 
 127.193333 35.747444 484.000000 127.193333 35.747444 499.000000 
 127.193444 35.747444 477.000000 127.193444 35.747444 490.000000 
 127.193556 35.747444 471.000000 127.193556 35.747444 481.000000 
 127.193778 35.747444 453.000000 127.193778 35.747444 464.000000 
 127.194000 35.747444 436.000000 127.194000 35.747444 446.000000 
 127.194111 35.747444 428.000000 127.194111 35.747444 438.000000 
 127.194222 35.747444 421.000000 127.194222 35.747444 430.000000 
 127.194333 35.747444 415.000000 127.194333 35.747444 422.000000 
 127.193333 35.747444 484.000000 127.193333 35.747444 499.000000 
 127.193444 35.747444 477.000000 127.193444 35.747444 490.000000 
 127.193556 35.747444 471.000000 127.193556 35.747444 481.000000 
 127.193667 35.747444 462.000000 127.193667 35.747444 472.000000 
 127.193889 35.747444 444.000000 127.193889 35.747444 455.000000 
 127.194111 35.747444 428.000000 127.194111 35.747444 438.000000 
 127.194222 35.747444 421.000000 127.194222 35.747444 430.000000 
 127.194333 35.747444 415.000000 127.194333 35.747444 422.000000 
 127.194444 35.747444 409.000000 127.194444 35.747444 417.000000 
 127.193333 35.747556 490.000000 127.193333 35.747556 502.000000 
 127.193444 35.747556 481.000000 127.193444 35.747556 492.000000 
 127.193556 35.747556 472.000000 127.193556 35.747556 480.000000 
 127.193667 35.747556 464.000000 127.193667 35.747556 471.000000 
 127.193889 35.747556 446.000000 127.193889 35.747556 457.000000 
 127.194111 35.747556 430.000000 127.194111 35.747556 442.000000 
 127.194222 35.747556 422.000000 127.194222 35.747556 435.000000 
 127.194333 35.747556 417.000000 127.194333 35.747556 428.000000 
 127.194444 35.747556 412.000000 127.194444 35.747556 422.000000 
 127.193333 35.747667 492.000000 127.193333 35.747667 502.000000 
 127.193444 35.747667 480.000000 127.193444 35.747667 493.000000 
 127.193556 35.747667 471.000000 127.193556 35.747667 482.000000 
 127.193667 35.747667 464.000000 127.193667 35.747667 473.000000 
 127.193889 35.747667 449.000000 127.193889 35.747667 460.000000 
 127.194111 35.747667 435.000000 127.194111 35.747667 446.000000 
 127.194222 35.747667 428.000000 127.194222 35.747667 439.000000 
 127.194333 35.747667 422.000000 127.194333 35.747667 433.000000 
 127.194444 35.747667 417.000000 127.194444 35.747667 426.000000 
 127.193444 35.747667 480.000000 127.193444 35.747667 493.000000 
 127.193556 35.747667 471.000000 127.193556 35.747667 482.000000 
 127.193667 35.747667 464.000000 127.193667 35.747667 473.000000 
 127.193778 35.747667 457.000000 127.193778 35.747667 466.000000 
 127.194000 35.747667 442.000000 127.194000 35.747667 453.000000 
 127.194222 35.747667 428.000000 127.194222 35.747667 439.000000 
 127.194333 35.747667 422.000000 127.194333 35.747667 433.000000 
 127.194444 35.747667 417.000000 127.194444 35.747667 426.000000 
 127.194556 35.747667 413.000000 127.194556 35.747667 421.000000 
 127.193444 35.747778 482.000000 127.193444 35.747778 498.000000 
 127.193556 35.747778 473.000000 127.193556 35.747778 490.000000 
 127.193667 35.747778 466.000000 127.193667 35.747778 480.000000 
 127.193778 35.747778 460.000000 127.193778 35.747778 472.000000 
 127.194000 35.747778 446.000000 127.194000 35.747778 459.000000 
 127.194222 35.747778 433.000000 127.194222 35.747778 446.000000 
 127.194333 35.747778 426.000000 127.194333 35.747778 440.000000 
 127.194444 35.747778 421.000000 127.194444 35.747778 435.000000 
 127.194556 35.747778 417.000000 127.194556 35.747778 431.000000 
 127.193444 35.747889 490.000000 127.193444 35.747889 503.000000 
 127.193556 35.747889 480.000000 127.193556 35.747889 496.000000 
 127.193667 35.747889 472.000000 127.193667 35.747889 486.000000 
 127.193778 35.747889 466.000000 127.193778 35.747889 477.000000 
 127.194000 35.747889 452.000000 127.194000 35.747889 464.000000 
 127.194222 35.747889 440.000000 127.194222 35.747889 451.000000 
 127.194333 35.747889 435.000000 127.194333 35.747889 446.000000 
 127.194444 35.747889 431.000000 127.194444 35.747889 442.000000 
 127.194556 35.747889 425.000000 127.194556 35.747889 438.000000 
 127.193556 35.747889 480.000000 127.193556 35.747889 496.000000 
 127.193667 35.747889 472.000000 127.193667 35.747889 486.000000 
 127.193778 35.747889 466.000000 127.193778 35.747889 477.000000 
 127.193889 35.747889 459.000000 127.193889 35.747889 470.000000 
 127.194111 35.747889 446.000000 127.194111 35.747889 457.000000 
 127.194333 35.747889 435.000000 127.194333 35.747889 446.000000 
 127.194444 35.747889 431.000000 127.194444 35.747889 442.000000 
 127.194556 35.747889 425.000000 127.194556 35.747889 438.000000 
 127.194667 35.747889 421.000000 127.194667 35.747889 433.000000 
 127.193556 35.748000 486.000000 127.193556 35.748000 503.000000 
 127.193667 35.748000 477.000000 127.193667 35.748000 495.000000 
 127.193778 35.748000 470.000000 127.193778 35.748000 485.000000 
 127.193889 35.748000 464.000000 127.193889 35.748000 477.000000 
 127.194111 35.748000 451.000000 127.194111 35.748000 465.000000 
 127.194333 35.748000 442.000000 127.194333 35.748000 457.000000 
 127.194444 35.748000 438.000000 127.194444 35.748000 453.000000 
 127.194556 35.748000 433.000000 127.194556 35.748000 448.000000 
 127.194667 35.748000 428.000000 127.194667 35.748000 444.000000 
 127.193556 35.748111 495.000000 127.193556 35.748111 503.000000 
 127.193667 35.748111 485.000000 127.193667 35.748111 498.000000 
 127.193778 35.748111 477.000000 127.193778 35.748111 490.000000 
 127.193889 35.748111 471.000000 127.193889 35.748111 481.000000 
 127.194111 35.748111 461.000000 127.194111 35.748111 472.000000 
 127.194333 35.748111 453.000000 127.194333 35.748111 466.000000 
 127.194444 35.748111 448.000000 127.194444 35.748111 461.000000 
 127.194556 35.748111 444.000000 127.194556 35.748111 456.000000 
 127.194667 35.748111 440.000000 127.194667 35.748111 451.000000 
 127.193667 35.748111 485.000000 127.193667 35.748111 498.000000 
 127.193778 35.748111 477.000000 127.193778 35.748111 490.000000 
 127.193889 35.748111 471.000000 127.193889 35.748111 481.000000 
 127.194000 35.748111 465.000000 127.194000 35.748111 475.000000 
 127.194222 35.748111 457.000000 127.194222 35.748111 469.000000 
 127.194444 35.748111 448.000000 127.194444 35.748111 461.000000 
 127.194556 35.748111 444.000000 127.194556 35.748111 456.000000 
 127.194667 35.748111 440.000000 127.194667 35.748111 451.000000 
 127.194778 35.748111 436.000000 127.194778 35.748111 447.000000 
 127.193667 35.748222 490.000000 127.193667 35.748222 495.000000 
 127.193778 35.748222 481.000000 127.193778 35.748222 492.000000 
 127.193889 35.748222 475.000000 127.193889 35.748222 490.000000 
 127.194000 35.748222 472.000000 127.194000 35.748222 486.000000 
 127.194222 35.748222 466.000000 127.194222 35.748222 481.000000 
 127.194444 35.748222 456.000000 127.194444 35.748222 471.000000 
 127.194556 35.748222 451.000000 127.194556 35.748222 465.000000 
 127.194667 35.748222 447.000000 127.194667 35.748222 459.000000 
 127.194778 35.748222 444.000000 127.194778 35.748222 456.000000 
 127.193667 35.748333 492.000000 127.193667 35.748333 487.000000 
 127.193778 35.748333 490.000000 127.193778 35.748333 487.000000 
 127.193889 35.748333 486.000000 127.193889 35.748333 487.000000 
 127.194000 35.748333 484.000000 127.194000 35.748333 485.000000 
 127.194222 35.748333 477.000000 127.194222 35.748333 484.000000 
 127.194444 35.748333 465.000000 127.194444 35.748333 473.000000 
 127.194556 35.748333 459.000000 127.194556 35.748333 467.000000 
 127.194667 35.748333 456.000000 127.194667 35.748333 462.000000 
 127.194778 35.748333 454.000000 127.194778 35.748333 459.000000 
 127.193778 35.748333 490.000000 127.193778 35.748333 487.000000 
 127.193889 35.748333 486.000000 127.193889 35.748333 487.000000 
 127.194000 35.748333 484.000000 127.194000 35.748333 485.000000 
 127.194111 35.748333 481.000000 127.194111 35.748333 485.000000 
 127.194333 35.748333 471.000000 127.194333 35.748333 478.000000 
 127.194556 35.748333 459.000000 127.194556 35.748333 467.000000 
 127.194667 35.748333 456.000000 127.194667 35.748333 462.000000 
 127.194778 35.748333 454.000000 127.194778 35.748333 459.000000 
 127.194889 35.748333 453.000000 127.194889 35.748333 458.000000 
 127.193778 35.748444 487.000000 127.193778 35.748444 479.000000 
 127.193889 35.748444 485.000000 127.193889 35.748444 480.000000 
 127.194000 35.748444 485.000000 127.194000 35.748444 481.000000 
 127.194111 35.748444 484.000000 127.194111 35.748444 482.000000 
 127.194333 35.748444 473.000000 127.194333 35.748444 479.000000 
 127.194556 35.748444 462.000000 127.194556 35.748444 472.000000 
 127.194667 35.748444 459.000000 127.194667 35.748444 470.000000 
 127.194778 35.748444 458.000000 127.194778 35.748444 468.000000 
 127.194889 35.748444 458.000000 127.194889 35.748444 467.000000 
 127.193778 35.748556 480.000000 127.193778 35.748556 471.000000 
 127.193889 35.748556 481.000000 127.193889 35.748556 476.000000 
 127.194000 35.748556 482.000000 127.194000 35.748556 477.000000 
 127.194111 35.748556 481.000000 127.194111 35.748556 479.000000 
 127.194333 35.748556 475.000000 127.194333 35.748556 480.000000 
 127.194556 35.748556 470.000000 127.194556 35.748556 475.000000 
 127.194667 35.748556 468.000000 127.194667 35.748556 474.000000 
 127.194778 35.748556 467.000000 127.194778 35.748556 472.000000 
 127.194889 35.748556 466.000000 127.194889 35.748556 472.000000 
 127.193889 35.748556 481.000000 127.193889 35.748556 476.000000 
 127.194000 35.748556 482.000000 127.194000 35.748556 477.000000 
 127.194111 35.748556 481.000000 127.194111 35.748556 479.000000 
 127.194222 35.748556 479.000000 127.194222 35.748556 480.000000 
 127.194444 35.748556 472.000000 127.194444 35.748556 478.000000 
 127.194667 35.748556 468.000000 127.194667 35.748556 474.000000 
 127.194778 35.748556 467.000000 127.194778 35.748556 472.000000 
 127.194889 35.748556 466.000000 127.194889 35.748556 472.000000 
 127.195000 35.748556 466.000000 127.195000 35.748556 471.000000 
 127.193889 35.748667 477.000000 127.193889 35.748667 469.000000 
 127.194000 35.748667 479.000000 127.194000 35.748667 475.000000 
 127.194111 35.748667 480.000000 127.194111 35.748667 477.000000 
 127.194222 35.748667 480.000000 127.194222 35.748667 479.000000 
 127.194444 35.748667 475.000000 127.194444 35.748667 480.000000 
 127.194667 35.748667 472.000000 127.194667 35.748667 476.000000 
 127.194778 35.748667 472.000000 127.194778 35.748667 475.000000 
 127.194889 35.748667 471.000000 127.194889 35.748667 473.000000 
 127.195000 35.748667 470.000000 127.195000 35.748667 471.000000 
 127.193889 35.748778 475.000000 127.193889 35.748778 458.000000 
 127.194000 35.748778 477.000000 127.194000 35.748778 464.000000 
 127.194111 35.748778 479.000000 127.194111 35.748778 469.000000 
 127.194222 35.748778 480.000000 127.194222 35.748778 474.000000 
 127.194444 35.748778 479.000000 127.194444 35.748778 476.000000 
 127.194667 35.748778 475.000000 127.194667 35.748778 475.000000 
 127.194778 35.748778 473.000000 127.194778 35.748778 472.000000 
 127.194889 35.748778 471.000000 127.194889 35.748778 471.000000 
 127.195000 35.748778 470.000000 127.195000 35.748778 471.000000 
 127.194000 35.748778 477.000000 127.194000 35.748778 464.000000 
 127.194111 35.748778 479.000000 127.194111 35.748778 469.000000 
 127.194222 35.748778 480.000000 127.194222 35.748778 474.000000 
 127.194333 35.748778 480.000000 127.194333 35.748778 475.000000 
 127.194556 35.748778 476.000000 127.194556 35.748778 476.000000 
 127.194778 35.748778 473.000000 127.194778 35.748778 472.000000 
 127.194889 35.748778 471.000000 127.194889 35.748778 471.000000 
 127.195000 35.748778 470.000000 127.195000 35.748778 471.000000 
 127.195111 35.748778 470.000000 127.195111 35.748778 470.000000 
 127.194000 35.748889 469.000000 127.194000 35.748889 457.000000 
 127.194111 35.748889 474.000000 127.194111 35.748889 462.000000 
 127.194222 35.748889 475.000000 127.194222 35.748889 466.000000 
 127.194333 35.748889 476.000000 127.194333 35.748889 469.000000 
 127.194556 35.748889 475.000000 127.194556 35.748889 469.000000 
 127.194778 35.748889 471.000000 127.194778 35.748889 467.000000 
 127.194889 35.748889 471.000000 127.194889 35.748889 466.000000 
 127.195000 35.748889 470.000000 127.195000 35.748889 465.000000 
 127.195111 35.748889 470.000000 127.195111 35.748889 464.000000 
 127.194000 35.749000 462.000000 127.194000 35.749000 448.000000 
 127.194111 35.749000 466.000000 127.194111 35.749000 454.000000 
 127.194222 35.749000 469.000000 127.194222 35.749000 457.000000 
 127.194333 35.749000 469.000000 127.194333 35.749000 459.000000 
 127.194556 35.749000 468.000000 127.194556 35.749000 458.000000 
 127.194778 35.749000 466.000000 127.194778 35.749000 455.000000 
 127.194889 35.749000 465.000000 127.194889 35.749000 454.000000 
 127.195000 35.749000 464.000000 127.195000 35.749000 453.000000 
 127.195111 35.749000 463.000000 127.195111 35.749000 452.000000 
 127.194111 35.749000 466.000000 127.194111 35.749000 454.000000 
 127.194222 35.749000 469.000000 127.194222 35.749000 457.000000 
 127.194333 35.749000 469.000000 127.194333 35.749000 459.000000 
 127.194444 35.749000 469.000000 127.194444 35.749000 459.000000 
 127.194667 35.749000 467.000000 127.194667 35.749000 457.000000 
 127.194889 35.749000 465.000000 127.194889 35.749000 454.000000 
 127.195000 35.749000 464.000000 127.195000 35.749000 453.000000 
 127.195111 35.749000 463.000000 127.195111 35.749000 452.000000 
 127.195222 35.749000 464.000000 127.195222 35.749000 451.000000 
 127.194111 35.749111 457.000000 127.194111 35.749111 449.000000 
 127.194222 35.749111 459.000000 127.194222 35.749111 452.000000 
 127.194333 35.749111 459.000000 127.194333 35.749111 453.000000 
 127.194444 35.749111 458.000000 127.194444 35.749111 452.000000 
 127.194667 35.749111 455.000000 127.194667 35.749111 450.000000 
 127.194889 35.749111 453.000000 127.194889 35.749111 447.000000 
 127.195000 35.749111 452.000000 127.195000 35.749111 445.000000 
 127.195111 35.749111 451.000000 127.195111 35.749111 444.000000 
 127.195222 35.749111 452.000000 127.195222 35.749111 443.000000 
 127.194111 35.749222 452.000000 127.194111 35.749222 436.000000 
 127.194222 35.749222 453.000000 127.194222 35.749222 439.000000 
 127.194333 35.749222 452.000000 127.194333 35.749222 439.000000 
 127.194444 35.749222 451.000000 127.194444 35.749222 438.000000 
 127.194667 35.749222 448.000000 127.194667 35.749222 436.000000 
 127.194889 35.749222 445.000000 127.194889 35.749222 433.000000 
 127.195000 35.749222 444.000000 127.195000 35.749222 432.000000 
 127.195111 35.749222 443.000000 127.195111 35.749222 430.000000 
 127.195222 35.749222 445.000000 127.195222 35.749222 430.000000 
 127.194222 35.749333 439.000000 127.194222 35.749333 428.000000 
 127.194333 35.749333 438.000000 127.194333 35.749333 429.000000 
 127.194444 35.749333 437.000000 127.194444 35.749333 429.000000 
 127.194556 35.749333 436.000000 127.194556 35.749333 428.000000 
 127.194778 35.749333 433.000000 127.194778 35.749333 425.000000 
 127.195000 35.749333 430.000000 127.195000 35.749333 422.000000 
 127.195111 35.749333 430.000000 127.195111 35.749333 421.000000 
 127.195222 35.749333 433.000000 127.195222 35.749333 421.000000 
 127.195333 35.749333 439.000000 127.195333 35.749333 427.000000 
 127.194222 35.749444 429.000000 127.194222 35.749444 412.000000 
 127.194333 35.749444 429.000000 127.194333 35.749444 412.000000 
 127.194444 35.749444 428.000000 127.194444 35.749444 411.000000 
 127.194556 35.749444 426.000000 127.194556 35.749444 410.000000 
 127.194778 35.749444 423.000000 127.194778 35.749444 408.000000 
 127.195000 35.749444 421.000000 127.195000 35.749444 407.000000 
 127.195111 35.749444 421.000000 127.195111 35.749444 409.000000 
 127.195222 35.749444 427.000000 127.195222 35.749444 414.000000 
 127.195333 35.749444 435.000000 127.195333 35.749444 421.000000 
 127.194222 35.749556 412.000000 127.194222 35.749556 401.000000 
 127.194333 35.749556 411.000000 127.194333 35.749556 400.000000 
 127.194444 35.749556 410.000000 127.194444 35.749556 399.000000 
 127.194556 35.749556 409.000000 127.194556 35.749556 398.000000 
 127.194778 35.749556 407.000000 127.194778 35.749556 397.000000 
 127.195000 35.749556 409.000000 127.195000 35.749556 397.000000 
 127.195111 35.749556 414.000000 127.195111 35.749556 402.000000 
 127.195222 35.749556 421.000000 127.195222 35.749556 410.000000 
 127.195333 35.749556 429.000000 127.195333 35.749556 417.000000 
 127.194333 35.749556 411.000000 127.194333 35.749556 400.000000 
 127.194444 35.749556 410.000000 127.194444 35.749556 399.000000 
 127.194556 35.749556 409.000000 127.194556 35.749556 398.000000 
 127.194667 35.749556 408.000000 127.194667 35.749556 397.000000 
 127.194889 35.749556 407.000000 127.194889 35.749556 396.000000 
 127.195111 35.749556 414.000000 127.195111 35.749556 402.000000 
 127.195222 35.749556 421.000000 127.195222 35.749556 410.000000 
 127.195333 35.749556 429.000000 127.195333 35.749556 417.000000 
 127.195444 35.749556 437.000000 127.195444 35.749556 425.000000 
 127.194333 35.749667 399.000000 127.194333 35.749667 388.000000 
 127.194444 35.749667 398.000000 127.194444 35.749667 387.000000 
 127.194556 35.749667 397.000000 127.194556 35.749667 386.000000 
 127.194667 35.749667 397.000000 127.194667 35.749667 386.000000 
 127.194889 35.749667 397.000000 127.194889 35.749667 385.000000 
 127.195111 35.749667 410.000000 127.195111 35.749667 396.000000 
 127.195222 35.749667 417.000000 127.195222 35.749667 405.000000 
 127.195333 35.749667 425.000000 127.195333 35.749667 413.000000 
 127.195444 35.749667 434.000000 127.195444 35.749667 421.000000 
 127.194333 35.749778 387.000000 127.194333 35.749778 380.000000 
 127.194444 35.749778 386.000000 127.194444 35.749778 379.000000 
 127.194556 35.749778 386.000000 127.194556 35.749778 379.000000 
 127.194667 35.749778 385.000000 127.194667 35.749778 378.000000 
 127.194889 35.749778 388.000000 127.194889 35.749778 376.000000 
 127.195111 35.749778 405.000000 127.195111 35.749778 392.000000 
 127.195222 35.749778 413.000000 127.195222 35.749778 401.000000 
 127.195333 35.749778 421.000000 127.195333 35.749778 410.000000 
 127.195444 35.749778 429.000000 127.195444 35.749778 418.000000 
 127.194444 35.749778 386.000000 127.194444 35.749778 379.000000 
 127.194556 35.749778 386.000000 127.194556 35.749778 379.000000 
 127.194667 35.749778 385.000000 127.194667 35.749778 378.000000 
 127.194778 35.749778 385.000000 127.194778 35.749778 376.000000 
 127.195000 35.749778 396.000000 127.195000 35.749778 382.000000 
 127.195222 35.749778 413.000000 127.195222 35.749778 401.000000 
 127.195333 35.749778 421.000000 127.195333 35.749778 410.000000 
 127.195444 35.749778 429.000000 127.195444 35.749778 418.000000 
 127.195556 35.749778 437.000000 127.195556 35.749778 425.000000 
 127.194444 35.749889 379.000000 127.194444 35.749889 367.000000 
 127.194556 35.749889 378.000000 127.194556 35.749889 367.000000 
 127.194667 35.749889 376.000000 127.194667 35.749889 367.000000 
 127.194778 35.749889 376.000000 127.194778 35.749889 367.000000 
 127.195000 35.749889 392.000000 127.195000 35.749889 375.000000 
 127.195222 35.749889 410.000000 127.195222 35.749889 396.000000 
 127.195333 35.749889 418.000000 127.195333 35.749889 405.000000 
 127.195444 35.749889 425.000000 127.195444 35.749889 413.000000 
 127.195556 35.749889 433.000000 127.195556 35.749889 421.000000 
 127.194444 35.750000 367.000000 127.194444 35.750000 360.000000 
 127.194556 35.750000 367.000000 127.194556 35.750000 359.000000 
 127.194667 35.750000 367.000000 127.194667 35.750000 360.000000 
 127.194778 35.750000 370.000000 127.194778 35.750000 362.000000 
 127.195000 35.750000 386.000000 127.195000 35.750000 373.000000 
 127.195222 35.750000 405.000000 127.195222 35.750000 393.000000 
 127.195333 35.750000 413.000000 127.195333 35.750000 402.000000 
 127.195444 35.750000 421.000000 127.195444 35.750000 410.000000 
 127.195556 35.750000 429.000000 127.195556 35.750000 418.000000 
 127.194556 35.750000 367.000000 127.194556 35.750000 359.000000 
 127.194667 35.750000 367.000000 127.194667 35.750000 360.000000 
 127.194778 35.750000 370.000000 127.194778 35.750000 362.000000 
 127.194889 35.750000 375.000000 127.194889 35.750000 367.000000 
 127.195111 35.750000 396.000000 127.195111 35.750000 383.000000 
 127.195333 35.750000 413.000000 127.195333 35.750000 402.000000 
 127.195444 35.750000 421.000000 127.195444 35.750000 410.000000 
 127.195556 35.750000 429.000000 127.195556 35.750000 418.000000 
 127.195667 35.750000 436.000000 127.195667 35.750000 426.000000 
 127.194556 35.750111 360.000000 127.194556 35.750111 347.000000 
 127.194667 35.750111 362.000000 127.194667 35.750111 349.000000 
 127.194778 35.750111 367.000000 127.194778 35.750111 358.000000 
 127.194889 35.750111 373.000000 127.194889 35.750111 364.000000 
 127.195111 35.750111 393.000000 127.195111 35.750111 377.000000 
 127.195333 35.750111 410.000000 127.195333 35.750111 397.000000 
 127.195444 35.750111 418.000000 127.195444 35.750111 406.000000 
 127.195556 35.750111 426.000000 127.195556 35.750111 414.000000 
 127.195667 35.750111 433.000000 127.195667 35.750111 422.000000 
 127.194556 35.750222 349.000000 127.194556 35.750222 341.000000 
 127.194667 35.750222 358.000000 127.194667 35.750222 347.000000 
 127.194778 35.750222 364.000000 127.194778 35.750222 355.000000 
 127.194889 35.750222 370.000000 127.194889 35.750222 361.000000 
 127.195111 35.750222 387.000000 127.195111 35.750222 374.000000 
 127.195333 35.750222 406.000000 127.195333 35.750222 394.000000 
 127.195444 35.750222 414.000000 127.195444 35.750222 403.000000 
 127.195556 35.750222 422.000000 127.195556 35.750222 411.000000 
 127.195667 35.750222 429.000000 127.195667 35.750222 419.000000 
 127.194667 35.750222 358.000000 127.194667 35.750222 347.000000 
 127.194778 35.750222 364.000000 127.194778 35.750222 355.000000 
 127.194889 35.750222 370.000000 127.194889 35.750222 361.000000 
 127.195000 35.750222 377.000000 127.195000 35.750222 368.000000 
 127.195222 35.750222 397.000000 127.195222 35.750222 384.000000 
 127.195444 35.750222 414.000000 127.195444 35.750222 403.000000 
 127.195556 35.750222 422.000000 127.195556 35.750222 411.000000 
 127.195667 35.750222 429.000000 127.195667 35.750222 419.000000 
 127.195778 35.750222 436.000000 127.195778 35.750222 427.000000 
 127.194667 35.750333 355.000000 127.194667 35.750333 345.000000 
 127.194778 35.750333 361.000000 127.194778 35.750333 352.000000 
 127.194889 35.750333 368.000000 127.194889 35.750333 359.000000 
 127.195000 35.750333 374.000000 127.195000 35.750333 365.000000 
 127.195222 35.750333 394.000000 127.195222 35.750333 379.000000 
 127.195444 35.750333 411.000000 127.195444 35.750333 399.000000 
 127.195556 35.750333 419.000000 127.195556 35.750333 406.000000 
 127.195667 35.750333 427.000000 127.195667 35.750333 414.000000 
 127.195778 35.750333 433.000000 127.195778 35.750333 423.000000 
 127.194667 35.750444 352.000000 127.194667 35.750444 339.000000 
 127.194778 35.750444 359.000000 127.194778 35.750444 348.000000 
 127.194889 35.750444 365.000000 127.194889 35.750444 355.000000 
 127.195000 35.750444 372.000000 127.195000 35.750444 362.000000 
 127.195222 35.750444 388.000000 127.195222 35.750444 376.000000 
 127.195444 35.750444 406.000000 127.195444 35.750444 395.000000 
 127.195556 35.750444 414.000000 127.195556 35.750444 403.000000 
 127.195667 35.750444 423.000000 127.195667 35.750444 411.000000 
 127.195778 35.750444 429.000000 127.195778 35.750444 419.000000 
 127.194778 35.750444 359.000000 127.194778 35.750444 348.000000 
 127.194889 35.750444 365.000000 127.194889 35.750444 355.000000 
 127.195000 35.750444 372.000000 127.195000 35.750444 362.000000 
 127.195111 35.750444 379.000000 127.195111 35.750444 369.000000 
 127.195333 35.750444 399.000000 127.195333 35.750444 385.000000 
 127.195556 35.750444 414.000000 127.195556 35.750444 403.000000 
 127.195667 35.750444 423.000000 127.195667 35.750444 411.000000 
 127.195778 35.750444 429.000000 127.195778 35.750444 419.000000 
 127.195889 35.750444 434.000000 127.195889 35.750444 426.000000 
 127.194778 35.750556 355.000000 127.194778 35.750556 344.000000 
 127.194889 35.750556 362.000000 127.194889 35.750556 352.000000 
 127.195000 35.750556 369.000000 127.195000 35.750556 359.000000 
 127.195111 35.750556 376.000000 127.195111 35.750556 366.000000 
 127.195333 35.750556 395.000000 127.195333 35.750556 382.000000 
 127.195556 35.750556 411.000000 127.195556 35.750556 400.000000 
 127.195667 35.750556 419.000000 127.195667 35.750556 407.000000 
 127.195778 35.750556 426.000000 127.195778 35.750556 415.000000 
 127.195889 35.750556 431.000000 127.195889 35.750556 423.000000 
 127.194778 35.750667 352.000000 127.194778 35.750667 338.000000 
 127.194889 35.750667 359.000000 127.194889 35.750667 347.000000 
 127.195000 35.750667 366.000000 127.195000 35.750667 354.000000 
 127.195111 35.750667 374.000000 127.195111 35.750667 361.000000 
 127.195333 35.750667 391.000000 127.195333 35.750667 377.000000 
 127.195556 35.750667 407.000000 127.195556 35.750667 394.000000 
 127.195667 35.750667 415.000000 127.195667 35.750667 402.000000 
 127.195778 35.750667 423.000000 127.195778 35.750667 409.000000 
 127.195889 35.750667 428.000000 127.195889 35.750667 415.000000 
 127.194889 35.750667 359.000000 127.194889 35.750667 347.000000 
 127.195000 35.750667 366.000000 127.195000 35.750667 354.000000 
 127.195111 35.750667 374.000000 127.195111 35.750667 361.000000 
 127.195222 35.750667 382.000000 127.195222 35.750667 369.000000 
 127.195444 35.750667 400.000000 127.195444 35.750667 385.000000 
 127.195667 35.750667 415.000000 127.195667 35.750667 402.000000 
 127.195778 35.750667 423.000000 127.195778 35.750667 409.000000 
 127.195889 35.750667 428.000000 127.195889 35.750667 415.000000 
 127.196000 35.750667 431.000000 127.196000 35.750667 420.000000 
 127.194889 35.750778 354.000000 127.194889 35.750778 342.000000 
 127.195000 35.750778 361.000000 127.195000 35.750778 351.000000 
 127.195111 35.750778 369.000000 127.195111 35.750778 358.000000 
 127.195222 35.750778 377.000000 127.195222 35.750778 365.000000 
 127.195444 35.750778 394.000000 127.195444 35.750778 382.000000 
 127.195667 35.750778 409.000000 127.195667 35.750778 398.000000 
 127.195778 35.750778 415.000000 127.195778 35.750778 404.000000 
 127.195889 35.750778 420.000000 127.195889 35.750778 410.000000 
 127.196000 35.750778 424.000000 127.196000 35.750778 414.000000 
 127.194889 35.750889 351.000000 127.194889 35.750889 336.000000 
 127.195000 35.750889 358.000000 127.195000 35.750889 344.000000 
 127.195111 35.750889 365.000000 127.195111 35.750889 352.000000 
 127.195222 35.750889 374.000000 127.195222 35.750889 359.000000 
 127.195444 35.750889 389.000000 127.195444 35.750889 376.000000 
 127.195667 35.750889 404.000000 127.195667 35.750889 390.000000 
 127.195778 35.750889 410.000000 127.195778 35.750889 398.000000 
 127.195889 35.750889 414.000000 127.195889 35.750889 403.000000 
 127.196000 35.750889 418.000000 127.196000 35.750889 407.000000 
 127.195000 35.750889 358.000000 127.195000 35.750889 344.000000 
 127.195111 35.750889 365.000000 127.195111 35.750889 352.000000 
 127.195222 35.750889 374.000000 127.195222 35.750889 359.000000 
 127.195333 35.750889 382.000000 127.195333 35.750889 367.000000 
 127.195556 35.750889 398.000000 127.195556 35.750889 383.000000 
 127.195778 35.750889 410.000000 127.195778 35.750889 398.000000 
 127.195889 35.750889 414.000000 127.195889 35.750889 403.000000 
 127.196000 35.750889 418.000000 127.196000 35.750889 407.000000 
 127.196111 35.750889 419.000000 127.196111 35.750889 410.000000 
 127.195000 35.751000 352.000000 127.195000 35.751000 340.000000 
 127.195111 35.751000 359.000000 127.195111 35.751000 348.000000 
 127.195222 35.751000 367.000000 127.195222 35.751000 355.000000 
 127.195333 35.751000 376.000000 127.195333 35.751000 363.000000 
 127.195556 35.751000 390.000000 127.195556 35.751000 379.000000 
 127.195778 35.751000 403.000000 127.195778 35.751000 392.000000 
 127.195889 35.751000 407.000000 127.195889 35.751000 399.000000 
 127.196000 35.751000 410.000000 127.196000 35.751000 402.000000 
 127.196111 35.751000 411.000000 127.196111 35.751000 405.000000 
 127.195000 35.751111 348.000000 127.195000 35.751111 334.000000 
 127.195111 35.751111 355.000000 127.195111 35.751111 341.000000 
 127.195222 35.751111 363.000000 127.195222 35.751111 348.000000 
 127.195333 35.751111 372.000000 127.195333 35.751111 355.000000 
 127.195556 35.751111 386.000000 127.195556 35.751111 372.000000 
 127.195778 35.751111 399.000000 127.195778 35.751111 384.000000 
 127.195889 35.751111 402.000000 127.195889 35.751111 389.000000 
 127.196000 35.751111 405.000000 127.196000 35.751111 393.000000 
 127.196111 35.751111 405.000000 127.196111 35.751111 395.000000 
 127.195111 35.751111 355.000000 127.195111 35.751111 341.000000 
 127.195222 35.751111 363.000000 127.195222 35.751111 348.000000 
 127.195333 35.751111 372.000000 127.195333 35.751111 355.000000 
 127.195444 35.751111 379.000000 127.195444 35.751111 364.000000 
 127.195667 35.751111 392.000000 127.195667 35.751111 378.000000 
 127.195889 35.751111 402.000000 127.195889 35.751111 389.000000 
 127.196000 35.751111 405.000000 127.196000 35.751111 393.000000 
 127.196111 35.751111 405.000000 127.196111 35.751111 395.000000 
 127.196222 35.751111 403.000000 127.196222 35.751111 396.000000 
 127.195111 35.751222 348.000000 127.195111 35.751222 336.000000 
 127.195222 35.751222 355.000000 127.195222 35.751222 343.000000 
 127.195333 35.751222 364.000000 127.195333 35.751222 350.000000 
 127.195444 35.751222 372.000000 127.195444 35.751222 358.000000 
 127.195667 35.751222 384.000000 127.195667 35.751222 373.000000 
 127.195889 35.751222 393.000000 127.195889 35.751222 382.000000 
 127.196000 35.751222 395.000000 127.196000 35.751222 384.000000 
 127.196111 35.751222 396.000000 127.196111 35.751222 386.000000 
 127.196222 35.751222 391.000000 127.196222 35.751222 389.000000 
 127.195111 35.751333 343.000000 127.195111 35.751333 330.000000 
 127.195222 35.751333 350.000000 127.195222 35.751333 336.000000 
 127.195333 35.751333 358.000000 127.195333 35.751333 343.000000 
 127.195444 35.751333 364.000000 127.195444 35.751333 350.000000 
 127.195667 35.751333 378.000000 127.195667 35.751333 361.000000 
 127.195889 35.751333 384.000000 127.195889 35.751333 368.000000 
 127.196000 35.751333 386.000000 127.196000 35.751333 369.000000 
 127.196111 35.751333 389.000000 127.196111 35.751333 373.000000 
 127.196222 35.751333 384.000000 127.196222 35.751333 377.000000 
 127.195222 35.751333 350.000000 127.195222 35.751333 336.000000 
 127.195333 35.751333 358.000000 127.195333 35.751333 343.000000 
 127.195444 35.751333 364.000000 127.195444 35.751333 350.000000 
 127.195556 35.751333 373.000000 127.195556 35.751333 355.000000 
 127.195778 35.751333 382.000000 127.195778 35.751333 366.000000 
 127.196000 35.751333 386.000000 127.196000 35.751333 369.000000 
 127.196111 35.751333 389.000000 127.196111 35.751333 373.000000 
 127.196222 35.751333 384.000000 127.196222 35.751333 377.000000 
 127.196333 35.751333 377.000000 127.196333 35.751333 375.000000 
 127.195222 35.751444 343.000000 127.195222 35.751444 331.000000 
 127.195333 35.751444 350.000000 127.195333 35.751444 337.000000 
 127.195444 35.751444 355.000000 127.195444 35.751444 343.000000 
 127.195556 35.751444 361.000000 127.195556 35.751444 348.000000 
 127.195778 35.751444 368.000000 127.195778 35.751444 357.000000 
 127.196000 35.751444 373.000000 127.196000 35.751444 360.000000 
 127.196111 35.751444 377.000000 127.196111 35.751444 364.000000 
 127.196222 35.751444 375.000000 127.196222 35.751444 369.000000 
 127.196333 35.751444 369.000000 127.196333 35.751444 369.000000 
 127.195222 35.751556 337.000000 127.195222 35.751556 320.000000 
 127.195333 35.751556 343.000000 127.195333 35.751556 325.000000 
 127.195444 35.751556 348.000000 127.195444 35.751556 329.000000 
 127.195556 35.751556 354.000000 127.195556 35.751556 333.000000 
 127.195778 35.751556 358.000000 127.195778 35.751556 338.000000 
 127.196000 35.751556 364.000000 127.196000 35.751556 346.000000 
 127.196111 35.751556 369.000000 127.196111 35.751556 352.000000 
 127.196222 35.751556 369.000000 127.196222 35.751556 357.000000 
 127.196333 35.751556 363.000000 127.196333 35.751556 359.000000 
 127.195333 35.751556 343.000000 127.195333 35.751556 325.000000 
 127.195444 35.751556 348.000000 127.195444 35.751556 329.000000 
 127.195556 35.751556 354.000000 127.195556 35.751556 333.000000 
 127.195667 35.751556 357.000000 127.195667 35.751556 336.000000 
 127.195889 35.751556 360.000000 127.195889 35.751556 341.000000 
 127.196111 35.751556 369.000000 127.196111 35.751556 352.000000 
 127.196222 35.751556 369.000000 127.196222 35.751556 357.000000 
 127.196333 35.751556 363.000000 127.196333 35.751556 359.000000 
 127.196444 35.751556 358.000000 127.196444 35.751556 355.000000 
 127.195333 35.751667 329.000000 127.195333 35.751667 316.000000 
 127.195444 35.751667 333.000000 127.195444 35.751667 320.000000 
 127.195556 35.751667 336.000000 127.195556 35.751667 323.000000 
 127.195667 35.751667 338.000000 127.195667 35.751667 323.000000 
 127.195889 35.751667 346.000000 127.195889 35.751667 330.000000 
 127.196111 35.751667 357.000000 127.196111 35.751667 344.000000 
 127.196222 35.751667 359.000000 127.196222 35.751667 350.000000 
 127.196333 35.751667 355.000000 127.196333 35.751667 352.000000 
 127.196444 35.751667 349.000000 127.196444 35.751667 349.000000 
 127.195333 35.751778 320.000000 127.195333 35.751778 306.000000 
 127.195444 35.751778 323.000000 127.195444 35.751778 314.000000 
 127.195556 35.751778 323.000000 127.195556 35.751778 315.000000 
 127.195667 35.751778 324.000000 127.195667 35.751778 314.000000 
 127.195889 35.751778 337.000000 127.195889 35.751778 319.000000 
 127.196111 35.751778 350.000000 127.196111 35.751778 334.000000 
 127.196222 35.751778 352.000000 127.196222 35.751778 341.000000 
 127.196333 35.751778 349.000000 127.196333 35.751778 340.000000 
 127.196444 35.751778 345.000000 127.196444 35.751778 338.000000 
 127.195444 35.751778 323.000000 127.195444 35.751778 314.000000 
 127.195556 35.751778 323.000000 127.195556 35.751778 315.000000 
 127.195667 35.751778 324.000000 127.195667 35.751778 314.000000 
 127.195778 35.751778 330.000000 127.195778 35.751778 313.000000 
 127.196000 35.751778 344.000000 127.196000 35.751778 327.000000 
 127.196222 35.751778 352.000000 127.196222 35.751778 341.000000 
 127.196333 35.751778 349.000000 127.196333 35.751778 340.000000 
 127.196444 35.751778 345.000000 127.196444 35.751778 338.000000 
 127.196556 35.751778 340.000000 127.196556 35.751778 337.000000 
 127.195444 35.751889 315.000000 127.195444 35.751889 310.000000 
 127.195556 35.751889 314.000000 127.195556 35.751889 310.000000 
 127.195667 35.751889 313.000000 127.195667 35.751889 306.000000 
 127.195778 35.751889 319.000000 127.195778 35.751889 306.000000 
 127.196000 35.751889 334.000000 127.196000 35.751889 322.000000 
 127.196222 35.751889 340.000000 127.196222 35.751889 334.000000 
 127.196333 35.751889 338.000000 127.196333 35.751889 332.000000 
 127.196444 35.751889 337.000000 127.196444 35.751889 330.000000 
 127.196556 35.751889 332.000000 127.196556 35.751889 330.000000 
 127.195444 35.752000 310.000000 127.195444 35.752000 305.000000 
 127.195556 35.752000 306.000000 127.195556 35.752000 304.000000 
 127.195667 35.752000 306.000000 127.195667 35.752000 295.000000 
 127.195778 35.752000 313.000000 127.195778 35.752000 297.000000 
 127.196000 35.752000 330.000000 127.196000 35.752000 314.000000 
 127.196222 35.752000 332.000000 127.196222 35.752000 324.000000 
 127.196333 35.752000 330.000000 127.196333 35.752000 322.000000 
 127.196444 35.752000 330.000000 127.196444 35.752000 320.000000 
 127.196556 35.752000 327.000000 127.196556 35.752000 320.000000 
 127.195556 35.752000 306.000000 127.195556 35.752000 304.000000 
 127.195667 35.752000 306.000000 127.195667 35.752000 295.000000 
 127.195778 35.752000 313.000000 127.195778 35.752000 297.000000 
 127.195889 35.752000 322.000000 127.195889 35.752000 304.000000 
 127.196111 35.752000 334.000000 127.196111 35.752000 322.000000 
 127.196333 35.752000 330.000000 127.196333 35.752000 322.000000 
 127.196444 35.752000 330.000000 127.196444 35.752000 320.000000 
 127.196556 35.752000 327.000000 127.196556 35.752000 320.000000 
 127.196667 35.752000 322.000000 127.196667 35.752000 319.000000 
 127.195556 35.752111 295.000000 127.195556 35.752111 294.000000 
 127.195667 35.752111 297.000000 127.195667 35.752111 289.000000 
 127.195778 35.752111 304.000000 127.195778 35.752111 293.000000 
 127.195889 35.752111 314.000000 127.195889 35.752111 299.000000 
 127.196111 35.752111 324.000000 127.196111 35.752111 317.000000 
 127.196333 35.752111 320.000000 127.196333 35.752111 317.000000 
 127.196444 35.752111 320.000000 127.196444 35.752111 314.000000 
 127.196556 35.752111 319.000000 127.196556 35.752111 313.000000 
 127.196667 35.752111 315.000000 127.196667 35.752111 313.000000 
 127.195556 35.752222 289.000000 127.195556 35.752222 287.000000 
 127.195667 35.752222 293.000000 127.195667 35.752222 285.000000 
 127.195778 35.752222 299.000000 127.195778 35.752222 290.000000 
 127.195889 35.752222 309.000000 127.195889 35.752222 297.000000 
 127.196111 35.752222 320.000000 127.196111 35.752222 314.000000 
 127.196333 35.752222 314.000000 127.196333 35.752222 313.000000 
 127.196444 35.752222 313.000000 127.196444 35.752222 307.000000 
 127.196556 35.752222 313.000000 127.196556 35.752222 307.000000 
 127.196667 35.752222 310.000000 127.196667 35.752222 307.000000 
 127.195667 35.752222 293.000000 127.195667 35.752222 285.000000 
 127.195778 35.752222 299.000000 127.195778 35.752222 290.000000 
 127.195889 35.752222 309.000000 127.195889 35.752222 297.000000 
 127.196000 35.752222 317.000000 127.196000 35.752222 306.000000 
 127.196222 35.752222 317.000000 127.196222 35.752222 317.000000 
 127.196444 35.752222 313.000000 127.196444 35.752222 307.000000 
 127.196556 35.752222 313.000000 127.196556 35.752222 307.000000 
 127.196667 35.752222 310.000000 127.196667 35.752222 307.000000 
 127.196778 35.752222 305.000000 127.196778 35.752222 305.000000 
 127.195667 35.752333 290.000000 127.195667 35.752333 279.000000 
 127.195778 35.752333 297.000000 127.195778 35.752333 287.000000 
 127.195889 35.752333 306.000000 127.195889 35.752333 295.000000 
 127.196000 35.752333 314.000000 127.196000 35.752333 303.000000 
 127.196222 35.752333 313.000000 127.196222 35.752333 315.000000 
 127.196444 35.752333 307.000000 127.196444 35.752333 304.000000 
 127.196556 35.752333 307.000000 127.196556 35.752333 299.000000 
 127.196667 35.752333 305.000000 127.196667 35.752333 298.000000 
 127.196778 35.752333 300.000000 127.196778 35.752333 297.000000 
 127.195667 35.752444 287.000000 127.195667 35.752444 277.000000 
 127.195778 35.752444 295.000000 127.195778 35.752444 285.000000 
 127.195889 35.752444 303.000000 127.195889 35.752444 294.000000 
 127.196000 35.752444 311.000000 127.196000 35.752444 301.000000 
 127.196222 35.752444 312.000000 127.196222 35.752444 314.000000 
 127.196444 35.752444 299.000000 127.196444 35.752444 306.000000 
 127.196556 35.752444 298.000000 127.196556 35.752444 298.000000 
 127.196667 35.752444 297.000000 127.196667 35.752444 292.000000 
 127.196778 35.752444 294.000000 127.196778 35.752444 290.000000 
 127.195778 35.752444 295.000000 127.195778 35.752444 285.000000 
 127.195889 35.752444 303.000000 127.195889 35.752444 294.000000 
 127.196000 35.752444 311.000000 127.196000 35.752444 301.000000 
 127.196111 35.752444 315.000000 127.196111 35.752444 310.000000 
 127.196333 35.752444 304.000000 127.196333 35.752444 311.000000 
 127.196556 35.752444 298.000000 127.196556 35.752444 298.000000 
 127.196667 35.752444 297.000000 127.196667 35.752444 292.000000 
 127.196778 35.752444 294.000000 127.196778 35.752444 290.000000 
 127.196889 35.752444 291.000000 127.196889 35.752444 289.000000 
 127.195778 35.752556 294.000000 127.195778 35.752556 285.000000 
 127.195889 35.752556 301.000000 127.195889 35.752556 293.000000 
 127.196000 35.752556 310.000000 127.196000 35.752556 301.000000 
 127.196111 35.752556 314.000000 127.196111 35.752556 309.000000 
 127.196333 35.752556 306.000000 127.196333 35.752556 315.000000 
 127.196556 35.752556 292.000000 127.196556 35.752556 301.000000 
 127.196667 35.752556 290.000000 127.196667 35.752556 293.000000 
 127.196778 35.752556 289.000000 127.196778 35.752556 287.000000 
 127.196889 35.752556 286.000000 127.196889 35.752556 281.000000 
 127.195778 35.752667 293.000000 127.195778 35.752667 286.000000 
 127.195889 35.752667 301.000000 127.195889 35.752667 294.000000 
 127.196000 35.752667 309.000000 127.196000 35.752667 301.000000 
 127.196111 35.752667 314.000000 127.196111 35.752667 310.000000 
 127.196333 35.752667 309.000000 127.196333 35.752667 315.000000 
 127.196556 35.752667 293.000000 127.196556 35.752667 303.000000 
 127.196667 35.752667 287.000000 127.196667 35.752667 295.000000 
 127.196778 35.752667 281.000000 127.196778 35.752667 288.000000 
 127.196889 35.752667 278.000000 127.196889 35.752667 281.000000 
 127.195889 35.752667 301.000000 127.195889 35.752667 294.000000 
 127.196000 35.752667 309.000000 127.196000 35.752667 301.000000 
 127.196111 35.752667 314.000000 127.196111 35.752667 310.000000 
 127.196222 35.752667 315.000000 127.196222 35.752667 315.000000 
 127.196444 35.752667 301.000000 127.196444 35.752667 311.000000 
 127.196667 35.752667 287.000000 127.196667 35.752667 295.000000 
 127.196778 35.752667 281.000000 127.196778 35.752667 288.000000 
 127.196889 35.752667 278.000000 127.196889 35.752667 281.000000 
 127.197000 35.752667 276.000000 127.197000 35.752667 274.000000 
 127.195889 35.752778 301.000000 127.195889 35.752778 294.000000 
 127.196000 35.752778 310.000000 127.196000 35.752778 302.000000 
 127.196111 35.752778 315.000000 127.196111 35.752778 310.000000 
 127.196222 35.752778 315.000000 127.196222 35.752778 315.000000 
 127.196444 35.752778 303.000000 127.196444 35.752778 313.000000 
 127.196667 35.752778 288.000000 127.196667 35.752778 296.000000 
 127.196778 35.752778 281.000000 127.196778 35.752778 289.000000 
 127.196889 35.752778 274.000000 127.196889 35.752778 282.000000 
 127.197000 35.752778 272.000000 127.197000 35.752778 275.000000 
 127.195889 35.752889 302.000000 127.195889 35.752889 294.000000 
 127.196000 35.752889 310.000000 127.196000 35.752889 303.000000 
 127.196111 35.752889 315.000000 127.196111 35.752889 310.000000 
 127.196222 35.752889 317.000000 127.196222 35.752889 315.000000 
 127.196444 35.752889 306.000000 127.196444 35.752889 313.000000 
 127.196667 35.752889 289.000000 127.196667 35.752889 296.000000 
 127.196778 35.752889 282.000000 127.196778 35.752889 289.000000 
 127.196889 35.752889 275.000000 127.196889 35.752889 281.000000 
 127.197000 35.752889 268.000000 127.197000 35.752889 274.000000 
 127.196000 35.752889 310.000000 127.196000 35.752889 303.000000 
 127.196111 35.752889 315.000000 127.196111 35.752889 310.000000 
 127.196222 35.752889 317.000000 127.196222 35.752889 315.000000 
 127.196333 35.752889 313.000000 127.196333 35.752889 315.000000 
 127.196556 35.752889 296.000000 127.196556 35.752889 307.000000 
 127.196778 35.752889 282.000000 127.196778 35.752889 289.000000 
 127.196889 35.752889 275.000000 127.196889 35.752889 281.000000 
 127.197000 35.752889 268.000000 127.197000 35.752889 274.000000 
 127.197111 35.752889 267.000000 127.197111 35.752889 266.000000 
 127.196000 35.753000 310.000000 127.196000 35.753000 301.000000 
 127.196111 35.753000 315.000000 127.196111 35.753000 308.000000 
 127.196222 35.753000 315.000000 127.196222 35.753000 312.000000 
 127.196333 35.753000 313.000000 127.196333 35.753000 312.000000 
 127.196556 35.753000 296.000000 127.196556 35.753000 305.000000 
 127.196778 35.753000 281.000000 127.196778 35.753000 286.000000 
 127.196889 35.753000 274.000000 127.196889 35.753000 278.000000 
 127.197000 35.753000 266.000000 127.197000 35.753000 271.000000 
 127.197111 35.753000 263.000000 127.197111 35.753000 265.000000 
 127.196000 35.753111 308.000000 127.196000 35.753111 300.000000 
 127.196111 35.753111 312.000000 127.196111 35.753111 306.000000 
 127.196222 35.753111 312.000000 127.196222 35.753111 308.000000 
 127.196333 35.753111 309.000000 127.196333 35.753111 307.000000 
 127.196556 35.753111 295.000000 127.196556 35.753111 301.000000 
 127.196778 35.753111 278.000000 127.196778 35.753111 284.000000 
 127.196889 35.753111 271.000000 127.196889 35.753111 276.000000 
 127.197000 35.753111 265.000000 127.197000 35.753111 269.000000 
 127.197111 35.753111 260.000000 127.197111 35.753111 263.000000 
 127.196111 35.753111 312.000000 127.196111 35.753111 306.000000 
 127.196222 35.753111 312.000000 127.196222 35.753111 308.000000 
 127.196333 35.753111 309.000000 127.196333 35.753111 307.000000 
 127.196444 35.753111 305.000000 127.196444 35.753111 305.000000 
 127.196667 35.753111 286.000000 127.196667 35.753111 292.000000 
 127.196889 35.753111 271.000000 127.196889 35.753111 276.000000 
 127.197000 35.753111 265.000000 127.197000 35.753111 269.000000 
 127.197111 35.753111 260.000000 127.197111 35.753111 263.000000 
 127.197222 35.753111 258.000000 127.197222 35.753111 257.000000 
 127.196111 35.753222 308.000000 127.196111 35.753222 302.000000 
 127.196222 35.753222 307.000000 127.196222 35.753222 303.000000 
 127.196333 35.753222 305.000000 127.196333 35.753222 300.000000 
 127.196444 35.753222 301.000000 127.196444 35.753222 297.000000 
 127.196667 35.753222 284.000000 127.196667 35.753222 287.000000 
 127.196889 35.753222 269.000000 127.196889 35.753222 272.000000 
 127.197000 35.753222 263.000000 127.197000 35.753222 266.000000 
 127.197111 35.753222 257.000000 127.197111 35.753222 260.000000 
 127.197222 35.753222 254.000000 127.197222 35.753222 254.000000 
 127.196111 35.753333 303.000000 127.196111 35.753333 300.000000 
 127.196222 35.753333 300.000000 127.196222 35.753333 300.000000 
 127.196333 35.753333 297.000000 127.196333 35.753333 297.000000 
 127.196444 35.753333 293.000000 127.196444 35.753333 291.000000 
 127.196667 35.753333 280.000000 127.196667 35.753333 282.000000 
 127.196889 35.753333 266.000000 127.196889 35.753333 269.000000 
 127.197000 35.753333 260.000000 127.197000 35.753333 263.000000 
 127.197111 35.753333 254.000000 127.197111 35.753333 258.000000 
 127.197222 35.753333 250.000000 127.197222 35.753333 252.000000 
 127.196111 35.753444 300.000000 127.196111 35.753444 295.000000 
 127.196222 35.753444 297.000000 127.196222 35.753444 295.000000 
 127.196333 35.753444 291.000000 127.196333 35.753444 294.000000 
 127.196444 35.753444 287.000000 127.196444 35.753444 288.000000 
 127.196667 35.753444 276.000000 127.196667 35.753444 275.000000 
 127.196889 35.753444 263.000000 127.196889 35.753444 264.000000 
 127.197000 35.753444 258.000000 127.197000 35.753444 258.000000 
 127.197111 35.753444 252.000000 127.197111 35.753444 253.000000 
 127.197222 35.753444 246.000000 127.197222 35.753444 248.000000 
 127.196222 35.753444 297.000000 127.196222 35.753444 295.000000 
 127.196333 35.753444 291.000000 127.196333 35.753444 294.000000 
 127.196444 35.753444 287.000000 127.196444 35.753444 288.000000
[truncated: 2,522,641 more chars]
