# Supplementary material for: Terrain Referenced Navigation Using a Multilayer Radial Basis Function-Based Extreme Learning Machine
Source: Hindawi journal article supplement (doi:10.1155/2019/9142694), 2019-07-11
Supplement: f1 [file 9142694.f1.zip › 9142694_Supplementary information files/CompareMatchingResults_180909/BSNNTrainResult.dat]

127.173333	350.34346	35.703	397.675362
127.173444	347.858908	35.703	397.675362
127.173556	352.347332	35.703	397.675362
127.173667	361.923036	35.703	397.675362
127.173889	388.746255	35.703	397.675362
127.174111	413.194582	35.703	397.675362
127.174222	419.797309	35.703	397.675362
127.174333	420.134037	35.703	397.675362
127.174444	412.313481	35.703	397.675362
127.173444	347.858908	35.703222	396.810999
127.173556	352.347332	35.703222	396.810999
127.173667	361.923036	35.703222	396.810999
127.173778	374.680252	35.703222	396.810999
127.174	402.208238	35.703222	396.810999
127.174222	419.797309	35.703222	396.810999
127.174333	420.134037	35.703222	396.810999
127.174444	412.313481	35.703222	396.810999
127.174556	409.56608	35.703222	396.810999
127.173556	352.347332	35.703445	385.729115
127.173667	361.923036	35.703445	385.729115
127.173778	374.680252	35.703445	385.729115
127.173889	388.746255	35.703445	385.729115
127.174111	413.194582	35.703445	385.729115
127.174333	420.134037	35.703445	385.729115
127.174444	412.313481	35.703445	385.729115
127.174556	409.56608	35.703445	385.729115
127.174667	408.154134	35.703445	385.729115
127.173667	361.923036	35.703778	380.627724
127.173778	374.680252	35.703778	380.627724
127.173889	388.746255	35.703778	380.627724
127.174	402.208238	35.703778	380.627724
127.174222	419.797309	35.703778	380.627724
127.174444	412.313481	35.703778	380.627724
127.174556	409.56608	35.703778	380.627724
127.174667	408.154134	35.703778	380.627724
127.174778	407.724868	35.703778	380.627724
127.173778	374.680252	35.704	380.362171
127.173889	388.746255	35.704	380.362171
127.174	402.208238	35.704	380.362171
127.174111	413.194582	35.704	380.362171
127.174333	420.134037	35.704	380.362171
127.174556	409.56608	35.704	380.362171
127.174667	408.154134	35.704	380.362171
127.174778	407.724868	35.704	380.362171
127.174889	406.965234	35.704	380.362171
127.173889	388.746255	35.700556	402.853503
127.174	402.208238	35.700556	402.853503
127.174111	413.194582	35.700556	402.853503
127.174222	419.797309	35.700556	402.853503
127.174444	412.313481	35.700556	402.853503
127.174667	408.154134	35.700556	402.853503
127.174778	407.724868	35.700556	402.853503
127.174889	406.965234	35.700556	402.853503
127.175	403.093061	35.700556	402.853503
127.173889	388.746255	35.700667	407.855853
127.174	402.208238	35.700667	407.855853
127.174111	413.194582	35.700667	407.855853
127.174222	419.797309	35.700667	407.855853
127.174444	412.313481	35.700667	407.855853
127.174667	408.154134	35.700667	407.855853
127.174778	407.724868	35.700667	407.855853
127.174889	406.965234	35.700667	407.855853
127.175	403.093061	35.700667	407.855853
127.173889	388.746255	35.700778	411.783836
127.174	402.208238	35.700778	411.783836
127.174111	413.194582	35.700778	411.783836
127.174222	419.797309	35.700778	411.783836
127.174444	412.313481	35.700778	411.783836
127.174667	408.154134	35.700778	411.783836
127.174778	407.724868	35.700778	411.783836
127.174889	406.965234	35.700778	411.783836
127.175	403.093061	35.700778	411.783836
127.174	402.208238	35.700778	411.783836
127.174111	413.194582	35.700778	411.783836
127.174222	419.797309	35.700778	411.783836
127.174333	420.134037	35.700778	411.783836
127.174556	409.56608	35.700778	411.783836
127.174778	407.724868	35.700778	411.783836
127.174889	406.965234	35.700778	411.783836
127.175	403.093061	35.700778	411.783836
127.175111	399.604969	35.700778	411.783836
127.174	402.208238	35.700889	414.736308
127.174111	413.194582	35.700889	414.736308
127.174222	419.797309	35.700889	414.736308
127.174333	420.134037	35.700889	414.736308
127.174556	409.56608	35.700889	414.736308
127.174778	407.724868	35.700889	414.736308
127.174889	406.965234	35.700889	414.736308
127.175	403.093061	35.700889	414.736308
127.175111	399.604969	35.700889	414.736308
127.174	402.208238	35.701	416.788261
127.174111	413.194582	35.701	416.788261
127.174222	419.797309	35.701	416.788261
127.174333	420.134037	35.701	416.788261
127.174556	409.56608	35.701	416.788261
127.174778	407.724868	35.701	416.788261
127.174889	406.965234	35.701	416.788261
127.175	403.093061	35.701	416.788261
127.175111	399.604969	35.701	416.788261
127.174	402.208238	35.701111	418.032093
127.174111	413.194582	35.701111	418.032093
127.174222	419.797309	35.701111	418.032093
127.174333	420.134037	35.701111	418.032093
127.174556	409.56608	35.701111	418.032093
127.174778	407.724868	35.701111	418.032093
127.174889	406.965234	35.701111	418.032093
127.175	403.093061	35.701111	418.032093
127.175111	399.604969	35.701111	418.032093
127.174111	413.194582	35.701111	418.032093
127.174222	419.797309	35.701111	418.032093
127.174333	420.134037	35.701111	418.032093
127.174444	412.313481	35.701111	418.032093
127.174667	408.154134	35.701111	418.032093
127.174889	406.965234	35.701111	418.032093
127.175	403.093061	35.701111	418.032093
127.175111	399.604969	35.701111	418.032093
127.175222	391.362106	35.701111	418.032093
127.174111	413.194582	35.701222	418.548667
127.174222	419.797309	35.701222	418.548667
127.174333	420.134037	35.701222	418.548667
127.174444	412.313481	35.701222	418.548667
127.174667	408.154134	35.701222	418.548667
127.174889	406.965234	35.701222	418.548667
127.175	403.093061	35.701222	418.548667
127.175111	399.604969	35.701222	418.548667
127.175222	391.362106	35.701222	418.548667
127.174111	413.194582	35.701333	418.425095
127.174222	419.797309	35.701333	418.425095
127.174333	420.134037	35.701333	418.425095
127.174444	412.313481	35.701333	418.425095
127.174667	408.154134	35.701333	418.425095
127.174889	406.965234	35.701333	418.425095
127.175	403.093061	35.701333	418.425095
127.175111	399.604969	35.701333	418.425095
127.175222	391.362106	35.701333	418.425095
127.174111	413.194582	35.701445	417.745345
127.174222	419.797309	35.701445	417.745345
127.174333	420.134037	35.701445	417.745345
127.174444	412.313481	35.701445	417.745345
127.174667	408.154134	35.701445	417.745345
127.174889	406.965234	35.701445	417.745345
127.175	403.093061	35.701445	417.745345
127.175111	399.604969	35.701445	417.745345
127.175222	391.362106	35.701445	417.745345
127.174222	419.797309	35.701445	417.745345
127.174333	420.134037	35.701445	417.745345
127.174444	412.313481	35.701445	417.745345
127.174556	409.56608	35.701445	417.745345
127.174778	407.724868	35.701445	417.745345
127.175	403.093061	35.701445	417.745345
127.175111	399.604969	35.701445	417.745345
127.175222	391.362106	35.701445	417.745345
127.175333	386.454113	35.701445	417.745345
127.174222	419.797309	35.701556	416.597205
127.174333	420.134037	35.701556	416.597205
127.174444	412.313481	35.701556	416.597205
127.174556	409.56608	35.701556	416.597205
127.174778	407.724868	35.701556	416.597205
127.175	403.093061	35.701556	416.597205
127.175111	399.604969	35.701556	416.597205
127.175222	391.362106	35.701556	416.597205
127.175333	386.454113	35.701556	416.597205
127.174222	419.797309	35.701667	415.062056
127.174333	420.134037	35.701667	415.062056
127.174444	412.313481	35.701667	415.062056
127.174556	409.56608	35.701667	415.062056
127.174778	407.724868	35.701667	415.062056
127.175	403.093061	35.701667	415.062056
127.175111	399.604969	35.701667	415.062056
127.175222	391.362106	35.701667	415.062056
127.175333	386.454113	35.701667	415.062056
127.174222	419.797309	35.701778	413.230311
127.174333	420.134037	35.701778	413.230311
127.174444	412.313481	35.701778	413.230311
127.174556	409.56608	35.701778	413.230311
127.174778	407.724868	35.701778	413.230311
127.175	403.093061	35.701778	413.230311
127.175111	399.604969	35.701778	413.230311
127.175222	391.362106	35.701778	413.230311
127.175333	386.454113	35.701778	413.230311
127.174333	420.134037	35.701889	411.181
127.174444	412.313481	35.701889	411.181
127.174556	409.56608	35.701889	411.181
127.174667	408.154134	35.701889	411.181
127.174889	406.965234	35.701889	411.181
127.175111	399.604969	35.701889	411.181
127.175222	391.362106	35.701889	411.181
127.175333	386.454113	35.701889	411.181
127.175444	382.439772	35.701889	411.181
127.174333	420.134037	35.702	409.006304
127.174444	412.313481	35.702	409.006304
127.174556	409.56608	35.702	409.006304
127.174667	408.154134	35.702	409.006304
127.174889	406.965234	35.702	409.006304
127.175111	399.604969	35.702	409.006304
127.175222	391.362106	35.702	409.006304
127.175333	386.454113	35.702	409.006304
127.175444	382.439772	35.702	409.006304
127.174333	420.134037	35.702111	406.784069
127.174444	412.313481	35.702111	406.784069
127.174556	409.56608	35.702111	406.784069
127.174667	408.154134	35.702111	406.784069
127.174889	406.965234	35.702111	406.784069
127.175111	399.604969	35.702111	406.784069
127.175222	391.362106	35.702111	406.784069
127.175333	386.454113	35.702111	406.784069
127.175444	382.439772	35.702111	406.784069
127.174333	420.134037	35.702222	404.607071
127.174444	412.313481	35.702222	404.607071
127.174556	409.56608	35.702222	404.607071
127.174667	408.154134	35.702222	404.607071
127.174889	406.965234	35.702222	404.607071
127.175111	399.604969	35.702222	404.607071
127.175222	391.362106	35.702222	404.607071
127.175333	386.454113	35.702222	404.607071
127.175444	382.439772	35.702222	404.607071
127.174444	412.313481	35.702222	404.607071
127.174556	409.56608	35.702222	404.607071
127.174667	408.154134	35.702222	404.607071
127.174778	407.724868	35.702222	404.607071
127.175	403.093061	35.702222	404.607071
127.175222	391.362106	35.702222	404.607071
127.175333	386.454113	35.702222	404.607071
127.175444	382.439772	35.702222	404.607071
127.175556	379.660927	35.702222	404.607071
127.174444	412.313481	35.702333	402.55315
127.174556	409.56608	35.702333	402.55315
127.174667	408.154134	35.702333	402.55315
127.174778	407.724868	35.702333	402.55315
127.175	403.093061	35.702333	402.55315
127.175222	391.362106	35.702333	402.55315
127.175333	386.454113	35.702333	402.55315
127.175444	382.439772	35.702333	402.55315
127.175556	379.660927	35.702333	402.55315
127.174444	412.313481	35.702445	400.711569
127.174556	409.56608	35.702445	400.711569
127.174667	408.154134	35.702445	400.711569
127.174778	407.724868	35.702445	400.711569
127.175	403.093061	35.702445	400.711569
127.175222	391.362106	35.702445	400.711569
127.175333	386.454113	35.702445	400.711569
127.175444	382.439772	35.702445	400.711569
127.175556	379.660927	35.702445	400.711569
127.174444	412.313481	35.702556	399.170133
127.174556	409.56608	35.702556	399.170133
127.174667	408.154134	35.702556	399.170133
127.174778	407.724868	35.702556	399.170133
127.175	403.093061	35.702556	399.170133
127.175222	391.362106	35.702556	399.170133
127.175333	386.454113	35.702556	399.170133
127.175444	382.439772	35.702556	399.170133
127.175556	379.660927	35.702556	399.170133
127.174556	409.56608	35.702556	399.170133
127.174667	408.154134	35.702556	399.170133
127.174778	407.724868	35.702556	399.170133
127.174889	406.965234	35.702556	399.170133
127.175111	399.604969	35.702556	399.170133
127.175333	386.454113	35.702556	399.170133
127.175444	382.439772	35.702556	399.170133
127.175556	379.660927	35.702556	399.170133
127.175667	373.664909	35.702556	399.170133
127.174556	409.56608	35.702667	398.008869
127.174667	408.154134	35.702667	398.008869
127.174778	407.724868	35.702667	398.008869
127.174889	406.965234	35.702667	398.008869
127.175111	399.604969	35.702667	398.008869
127.175333	386.454113	35.702667	398.008869
127.175444	382.439772	35.702667	398.008869
127.175556	379.660927	35.702667	398.008869
127.175667	373.664909	35.702667	398.008869
127.174556	409.56608	35.702778	397.316907
127.174667	408.154134	35.702778	397.316907
127.174778	407.724868	35.702778	397.316907
127.174889	406.965234	35.702778	397.316907
127.175111	399.604969	35.702778	397.316907
127.175333	386.454113	35.702778	397.316907
127.175444	382.439772	35.702778	397.316907
127.175556	379.660927	35.702778	397.316907
127.175667	373.664909	35.702778	397.316907
127.174556	409.56608	35.702889	397.177198
127.174667	408.154134	35.702889	397.177198
127.174778	407.724868	35.702889	397.177198
127.174889	406.965234	35.702889	397.177198
127.175111	399.604969	35.702889	397.177198
127.175333	386.454113	35.702889	397.177198
127.175444	382.439772	35.702889	397.177198
127.175556	379.660927	35.702889	397.177198
127.175667	373.664909	35.702889	397.177198
127.174667	408.154134	35.702889	397.177198
127.174778	407.724868	35.702889	397.177198
127.174889	406.965234	35.702889	397.177198
127.175	403.093061	35.702889	397.177198
127.175222	391.362106	35.702889	397.177198
127.175444	382.439772	35.702889	397.177198
127.175556	379.660927	35.702889	397.177198
127.175667	373.664909	35.702889	397.177198
127.175778	366.258991	35.702889	397.177198
127.174667	408.154134	35.703	397.675362
127.174778	407.724868	35.703	397.675362
127.174889	406.965234	35.703	397.675362
127.175	403.093061	35.703	397.675362
127.175222	391.362106	35.703	397.675362
127.175444	382.439772	35.703	397.675362
127.175556	379.660927	35.703	397.675362
127.175667	373.664909	35.703	397.675362
127.175778	366.258991	35.703	397.675362
127.174667	408.154134	35.703111	398.649313
127.174778	407.724868	35.703111	398.649313
127.174889	406.965234	35.703111	398.649313
127.175	403.093061	35.703111	398.649313
127.175222	391.362106	35.703111	398.649313
127.175444	382.439772	35.703111	398.649313
127.175556	379.660927	35.703111	398.649313
127.175667	373.664909	35.703111	398.649313
127.175778	366.258991	35.703111	398.649313
127.174667	408.154134	35.703222	396.810999
127.174778	407.724868	35.703222	396.810999
127.174889	406.965234	35.703222	396.810999
127.175	403.093061	35.703222	396.810999
127.175222	391.362106	35.703222	396.810999
127.175444	382.439772	35.703222	396.810999
127.175556	379.660927	35.703222	396.810999
127.175667	373.664909	35.703222	396.810999
127.175778	366.258991	35.703222	396.810999
127.174778	407.724868	35.703222	396.810999
127.174889	406.965234	35.703222	396.810999
127.175	403.093061	35.703222	396.810999
127.175111	399.604969	35.703222	396.810999
127.175333	386.454113	35.703222	396.810999
127.175556	379.660927	35.703222	396.810999
127.175667	373.664909	35.703222	396.810999
127.175778	366.258991	35.703222	396.810999
127.175889	358.85213	35.703222	396.810999
127.174778	407.724868	35.703333	389.29778
127.174889	406.965234	35.703333	389.29778
127.175	403.093061	35.703333	389.29778
127.175111	399.604969	35.703333	389.29778
127.175333	386.454113	35.703333	389.29778
127.175556	379.660927	35.703333	389.29778
127.175667	373.664909	35.703333	389.29778
127.175778	366.258991	35.703333	389.29778
127.175889	358.85213	35.703333	389.29778
127.174778	407.724868	35.703445	385.729115
127.174889	406.965234	35.703445	385.729115
127.175	403.093061	35.703445	385.729115
127.175111	399.604969	35.703445	385.729115
127.175333	386.454113	35.703445	385.729115
127.175556	379.660927	35.703445	385.729115
127.175667	373.664909	35.703445	385.729115
127.175778	366.258991	35.703445	385.729115
127.175889	358.85213	35.703445	385.729115
127.174778	407.724868	35.703556	390.536005
127.174889	406.965234	35.703556	390.536005
127.175	403.093061	35.703556	390.536005
127.175111	399.604969	35.703556	390.536005
127.175333	386.454113	35.703556	390.536005
127.175556	379.660927	35.703556	390.536005
127.175667	373.664909	35.703556	390.536005
127.175778	366.258991	35.703556	390.536005
127.175889	358.85213	35.703556	390.536005
127.174889	406.965234	35.703556	390.536005
127.175	403.093061	35.703556	390.536005
127.175111	399.604969	35.703556	390.536005
127.175222	391.362106	35.703556	390.536005
127.175444	382.439772	35.703556	390.536005
127.175667	373.664909	35.703556	390.536005
127.175778	366.258991	35.703556	390.536005
127.175889	358.85213	35.703556	390.536005
127.176	353.641444	35.703556	390.536005
127.174889	406.965234	35.703667	388.926843
127.175	403.093061	35.703667	388.926843
127.175111	399.604969	35.703667	388.926843
127.175222	391.362106	35.703667	388.926843
127.175444	382.439772	35.703667	388.926843
127.175667	373.664909	35.703667	388.926843
127.175778	366.258991	35.703667	388.926843
127.175889	358.85213	35.703667	388.926843
127.176	353.641444	35.703667	388.926843
127.174889	406.965234	35.703778	380.627724
127.175	403.093061	35.703778	380.627724
127.175111	399.604969	35.703778	380.627724
127.175222	391.362106	35.703778	380.627724
127.175444	382.439772	35.703778	380.627724
127.175667	373.664909	35.703778	380.627724
127.175778	366.258991	35.703778	380.627724
127.175889	358.85213	35.703778	380.627724
127.176	353.641444	35.703778	380.627724
127.174889	406.965234	35.703889	380.244867
127.175	403.093061	35.703889	380.244867
127.175111	399.604969	35.703889	380.244867
127.175222	391.362106	35.703889	380.244867
127.175444	382.439772	35.703889	380.244867
127.175667	373.664909	35.703889	380.244867
127.175778	366.258991	35.703889	380.244867
127.175889	358.85213	35.703889	380.244867
127.176	353.641444	35.703889	380.244867
127.175	403.093061	35.703889	380.244867
127.175111	399.604969	35.703889	380.244867
127.175222	391.362106	35.703889	380.244867
127.175333	386.454113	35.703889	380.244867
127.175556	379.660927	35.703889	380.244867
127.175778	366.258991	35.703889	380.244867
127.175889	358.85213	35.703889	380.244867
127.176	353.641444	35.703889	380.244867
127.176111	351.473207	35.703889	380.244867
127.175	403.093061	35.704	380.362171
127.175111	399.604969	35.704	380.362171
127.175222	391.362106	35.704	380.362171
127.175333	386.454113	35.704	380.362171
127.175556	379.660927	35.704	380.362171
127.175778	366.258991	35.704	380.362171
127.175889	358.85213	35.704	380.362171
127.176	353.641444	35.704	380.362171
127.176111	351.473207	35.704	380.362171
127.175	403.093061	35.704111	369.41038
127.175111	399.604969	35.704111	369.41038
127.175222	391.362106	35.704111	369.41038
127.175333	386.454113	35.704111	369.41038
127.175556	379.660927	35.704111	369.41038
127.175778	366.258991	35.704111	369.41038
127.175889	358.85213	35.704111	369.41038
127.176	353.641444	35.704111	369.41038
127.176111	351.473207	35.704111	369.41038
127.175	403.093061	35.704222	360.046673
127.175111	399.604969	35.704222	360.046673
127.175222	391.362106	35.704222	360.046673
127.175333	386.454113	35.704222	360.046673
127.175556	379.660927	35.704222	360.046673
127.175778	366.258991	35.704222	360.046673
127.175889	358.85213	35.704222	360.046673
127.176	353.641444	35.704222	360.046673
127.176111	351.473207	35.704222	360.046673
127.175111	399.604969	35.704222	360.046673
127.175222	391.362106	35.704222	360.046673
127.175333	386.454113	35.704222	360.046673
127.175444	382.439772	35.704222	360.046673
127.175667	373.664909	35.704222	360.046673
127.175889	358.85213	35.704222	360.046673
127.176	353.641444	35.704222	360.046673
127.176111	351.473207	35.704222	360.046673
127.176222	349.191658	35.704222	360.046673
127.175111	399.604969	35.704333	360.916315
127.175222	391.362106	35.704333	360.916315
127.175333	386.454113	35.704333	360.916315
127.175444	382.439772	35.704333	360.916315
127.175667	373.664909	35.704333	360.916315
127.175889	358.85213	35.704333	360.916315
127.176	353.641444	35.704333	360.916315
127.176111	351.473207	35.704333	360.916315
127.176222	349.191658	35.704333	360.916315
127.175111	399.604969	35.704444	366.295687
127.175222	391.362106	35.704444	366.295687
127.175333	386.454113	35.704444	366.295687
127.175444	382.439772	35.704444	366.295687
127.175667	373.664909	35.704444	366.295687
127.175889	358.85213	35.704444	366.295687
127.176	353.641444	35.704444	366.295687
127.176111	351.473207	35.704444	366.295687
127.176222	349.191658	35.704444	366.295687
127.175111	399.604969	35.704555	371.6326
127.175222	391.362106	35.704555	371.6326
127.175333	386.454113	35.704555	371.6326
127.175444	382.439772	35.704555	371.6326
127.175667	373.664909	35.704555	371.6326
127.175889	358.85213	35.704555	371.6326
127.176	353.641444	35.704555	371.6326
127.176111	351.473207	35.704555	371.6326
127.176222	349.191658	35.704555	371.6326
127.175222	391.362106	35.704555	371.6326
127.175333	386.454113	35.704555	371.6326
127.175444	382.439772	35.704555	371.6326
127.175556	379.660927	35.704555	371.6326
127.175778	366.258991	35.704555	371.6326
127.176	353.641444	35.704555	371.6326
127.176111	351.473207	35.704555	371.6326
127.176222	349.191658	35.704555	371.6326
127.176333	347.439378	35.704555	371.6326
127.175222	391.362106	35.704667	374.380093
127.175333	386.454113	35.704667	374.380093
127.175444	382.439772	35.704667	374.380093
127.175556	379.660927	35.704667	374.380093
127.175778	366.258991	35.704667	374.380093
127.176	353.641444	35.704667	374.380093
127.176111	351.473207	35.704667	374.380093
127.176222	349.191658	35.704667	374.380093
127.176333	347.439378	35.704667	374.380093
127.175222	391.362106	35.704778	372.804016
127.175333	386.454113	35.704778	372.804016
127.175444	382.439772	35.704778	372.804016
127.175556	379.660927	35.704778	372.804016
127.175778	366.258991	35.704778	372.804016
127.176	353.641444	35.704778	372.804016
127.176111	351.473207	35.704778	372.804016
127.176222	349.191658	35.704778	372.804016
127.176333	347.439378	35.704778	372.804016
127.175222	391.362106	35.704889	366.683171
127.175333	386.454113	35.704889	366.683171
127.175444	382.439772	35.704889	366.683171
127.175556	379.660927	35.704889	366.683171
127.175778	366.258991	35.704889	366.683171
127.176	353.641444	35.704889	366.683171
127.176111	351.473207	35.704889	366.683171
127.176222	349.191658	35.704889	366.683171
127.176333	347.439378	35.704889	366.683171
127.175333	386.454113	35.704889	366.683171
127.175444	382.439772	35.704889	366.683171
127.175556	379.660927	35.704889	366.683171
127.175667	373.664909	35.704889	366.683171
127.175889	358.85213	35.704889	366.683171
127.176111	351.473207	35.704889	366.683171
127.176222	349.191658	35.704889	366.683171
127.176333	347.439378	35.704889	366.683171
127.176444	346.001234	35.704889	366.683171
127.175333	386.454113	35.705	358.754837
127.175444	382.439772	35.705	358.754837
127.175556	379.660927	35.705	358.754837
127.175667	373.664909	35.705	358.754837
127.175889	358.85213	35.705	358.754837
127.176111	351.473207	35.705	358.754837
127.176222	349.191658	35.705	358.754837
127.176333	347.439378	35.705	358.754837
127.176444	346.001234	35.705	358.754837
127.175333	386.454113	35.705111	350.64429
127.175444	382.439772	35.705111	350.64429
127.175556	379.660927	35.705111	350.64429
127.175667	373.664909	35.705111	350.64429
127.175889	358.85213	35.705111	350.64429
127.176111	351.473207	35.705111	350.64429
127.176222	349.191658	35.705111	350.64429
127.176333	347.439378	35.705111	350.64429
127.176444	346.001234	35.705111	350.64429
127.175333	386.454113	35.705222	342.439402
127.175444	382.439772	35.705222	342.439402
127.175556	379.660927	35.705222	342.439402
127.175667	373.664909	35.705222	342.439402
127.175889	358.85213	35.705222	342.439402
127.176111	351.473207	35.705222	342.439402
127.176222	349.191658	35.705222	342.439402
127.176333	347.439378	35.705222	342.439402
127.176444	346.001234	35.705222	342.439402
127.175444	382.439772	35.705222	342.439402
127.175556	379.660927	35.705222	342.439402
127.175667	373.664909	35.705222	342.439402
127.175778	366.258991	35.705222	342.439402
127.176	353.641444	35.705222	342.439402
127.176222	349.191658	35.705222	342.439402
127.176333	347.439378	35.705222	342.439402
127.176444	346.001234	35.705222	342.439402
127.176556	343.712647	35.705222	342.439402
127.175444	382.439772	35.705333	336.866649
127.175556	379.660927	35.705333	336.866649
127.175667	373.664909	35.705333	336.866649
127.175778	366.258991	35.705333	336.866649
127.176	353.641444	35.705333	336.866649
127.176222	349.191658	35.705333	336.866649
127.176333	347.439378	35.705333	336.866649
127.176444	346.001234	35.705333	336.866649
127.176556	343.712647	35.705333	336.866649
127.175444	382.439772	35.705444	336.822643
127.175556	379.660927	35.705444	336.822643
127.175667	373.664909	35.705444	336.822643
127.175778	366.258991	35.705444	336.822643
127.176	353.641444	35.705444	336.822643
127.176222	349.191658	35.705444	336.822643
127.176333	347.439378	35.705444	336.822643
127.176444	346.001234	35.705444	336.822643
127.176556	343.712647	35.705444	336.822643
127.175444	382.439772	35.705555	340.463994
127.175556	379.660927	35.705555	340.463994
127.175667	373.664909	35.705555	340.463994
127.175778	366.258991	35.705555	340.463994
127.176	353.641444	35.705555	340.463994
127.176222	349.191658	35.705555	340.463994
127.176333	347.439378	35.705555	340.463994
127.176444	346.001234	35.705555	340.463994
127.176556	343.712647	35.705555	340.463994
127.175556	379.660927	35.705555	340.463994
127.175667	373.664909	35.705555	340.463994
127.175778	366.258991	35.705555	340.463994
127.175889	358.85213	35.705555	340.463994
127.176111	351.473207	35.705555	340.463994
127.176333	347.439378	35.705555	340.463994
127.176444	346.001234	35.705555	340.463994
127.176556	343.712647	35.705555	340.463994
127.176667	342.783407	35.705555	340.463994
127.175556	379.660927	35.705667	344.899998
127.175667	373.664909	35.705667	344.899998
127.175778	366.258991	35.705667	344.899998
127.175889	358.85213	35.705667	344.899998
127.176111	351.473207	35.705667	344.899998
127.176333	347.439378	35.705667	344.899998
127.176444	346.001234	35.705667	344.899998
127.176556	343.712647	35.705667	344.899998
127.176667	342.783407	35.705667	344.899998
127.175556	379.660927	35.705778	347.473363
127.175667	373.664909	35.705778	347.473363
127.175778	366.258991	35.705778	347.473363
127.175889	358.85213	35.705778	347.473363
127.176111	351.473207	35.705778	347.473363
127.176333	347.439378	35.705778	347.473363
127.176444	346.001234	35.705778	347.473363
127.176556	343.712647	35.705778	347.473363
127.176667	342.783407	35.705778	347.473363
127.175556	379.660927	35.705889	347.034931
127.175667	373.664909	35.705889	347.034931
127.175778	366.258991	35.705889	347.034931
127.175889	358.85213	35.705889	347.034931
127.176111	351.473207	35.705889	347.034931
127.176333	347.439378	35.705889	347.034931
127.176444	346.001234	35.705889	347.034931
127.176556	343.712647	35.705889	347.034931
127.176667	342.783407	35.705889	347.034931
127.175667	373.664909	35.705889	347.034931
127.175778	366.258991	35.705889	347.034931
127.175889	358.85213	35.705889	347.034931
127.176	353.641444	35.705889	347.034931
127.176222	349.191658	35.705889	347.034931
127.176444	346.001234	35.705889	347.034931
127.176556	343.712647	35.705889	347.034931
127.176667	342.783407	35.705889	347.034931
127.176778	342.32853	35.705889	347.034931
127.175667	373.664909	35.706	343.74342
127.175778	366.258991	35.706	343.74342
127.175889	358.85213	35.706	343.74342
127.176	353.641444	35.706	343.74342
127.176222	349.191658	35.706	343.74342
127.176444	346.001234	35.706	343.74342
127.176556	343.712647	35.706	343.74342
127.176667	342.783407	35.706	343.74342
127.176778	342.32853	35.706	343.74342
127.175667	373.664909	35.706111	338.360449
127.175778	366.258991	35.706111	338.360449
127.175889	358.85213	35.706111	338.360449
127.176	353.641444	35.706111	338.360449
127.176222	349.191658	35.706111	338.360449
127.176444	346.001234	35.706111	338.360449
127.176556	343.712647	35.706111	338.360449
127.176667	342.783407	35.706111	338.360449
127.176778	342.32853	35.706111	338.360449
127.175667	373.664909	35.706222	332.56888
127.175778	366.258991	35.706222	332.56888
127.175889	358.85213	35.706222	332.56888
127.176	353.641444	35.706222	332.56888
127.176222	349.191658	35.706222	332.56888
127.176444	346.001234	35.706222	332.56888
127.176556	343.712647	35.706222	332.56888
127.176667	342.783407	35.706222	332.56888
127.176778	342.32853	35.706222	332.56888
127.175778	366.258991	35.706222	332.56888
127.175889	358.85213	35.706222	332.56888
127.176	353.641444	35.706222	332.56888
127.176111	351.473207	35.706222	332.56888
127.176333	347.439378	35.706222	332.56888
127.176556	343.712647	35.706222	332.56888
127.176667	342.783407	35.706222	332.56888
127.176778	342.32853	35.706222	332.56888
127.176889	344.578809	35.706222	332.56888
127.175778	366.258991	35.706333	329.988679
127.175889	358.85213	35.706333	329.988679
127.176	353.641444	35.706333	329.988679
127.176111	351.473207	35.706333	329.988679
127.176333	347.439378	35.706333	329.988679
127.176556	343.712647	35.706333	329.988679
127.176667	342.783407	35.706333	329.988679
127.176778	342.32853	35.706333	329.988679
127.176889	344.578809	35.706333	329.988679
127.175778	366.258991	35.706444	331.950134
127.175889	358.85213	35.706444	331.950134
127.176	353.641444	35.706444	331.950134
127.176111	351.473207	35.706444	331.950134
127.176333	347.439378	35.706444	331.950134
127.176556	343.712647	35.706444	331.950134
127.176667	342.783407	35.706444	331.950134
127.176778	342.32853	35.706444	331.950134
127.176889	344.578809	35.706444	331.950134
127.175778	366.258991	35.706555	336.42742
127.175889	358.85213	35.706555	336.42742
127.176	353.641444	35.706555	336.42742
127.176111	351.473207	35.706555	336.42742
127.176333	347.439378	35.706555	336.42742
127.176556	343.712647	35.706555	336.42742
127.176667	342.783407	35.706555	336.42742
127.176778	342.32853	35.706555	336.42742
127.176889	344.578809	35.706555	336.42742
127.175889	358.85213	35.706555	336.42742
127.176	353.641444	35.706555	336.42742
127.176111	351.473207	35.706555	336.42742
127.176222	349.191658	35.706555	336.42742
127.176444	346.001234	35.706555	336.42742
127.176667	342.783407	35.706555	336.42742
127.176778	342.32853	35.706555	336.42742
127.176889	344.578809	35.706555	336.42742
127.177	346.391975	35.706555	336.42742
127.175889	358.85213	35.706667	339.97616
127.176	353.641444	35.706667	339.97616
127.176111	351.473207	35.706667	339.97616
127.176222	349.191658	35.706667	339.97616
127.176444	346.001234	35.706667	339.97616
127.176667	342.783407	35.706667	339.97616
127.176778	342.32853	35.706667	339.97616
127.176889	344.578809	35.706667	339.97616
127.177	346.391975	35.706667	339.97616
127.175889	358.85213	35.706778	339.414549
127.176	353.641444	35.706778	339.414549
127.176111	351.473207	35.706778	339.414549
127.176222	349.191658	35.706778	339.414549
127.176444	346.001234	35.706778	339.414549
127.176667	342.783407	35.706778	339.414549
127.176778	342.32853	35.706778	339.414549
127.176889	344.578809	35.706778	339.414549
127.177	346.391975	35.706778	339.414549
127.175889	358.85213	35.706889	335.982927
127.176	353.641444	35.706889	335.982927
127.176111	351.473207	35.706889	335.982927
127.176222	349.191658	35.706889	335.982927
127.176444	346.001234	35.706889	335.982927
127.176667	342.783407	35.706889	335.982927
127.176778	342.32853	35.706889	335.982927
127.176889	344.578809	35.706889	335.982927
127.177	346.391975	35.706889	335.982927
127.176	353.641444	35.706889	335.982927
127.176111	351.473207	35.706889	335.982927
127.176222	349.191658	35.706889	335.982927
127.176333	347.439378	35.706889	335.982927
127.176556	343.712647	35.706889	335.982927
127.176778	342.32853	35.706889	335.982927
127.176889	344.578809	35.706889	335.982927
127.177	346.391975	35.706889	335.982927
127.177111	348.214422	35.706889	335.982927
127.176	353.641444	35.707	332.780443
127.176111	351.473207	35.707	332.780443
127.176222	349.191658	35.707	332.780443
127.176333	347.439378	35.707	332.780443
127.176556	343.712647	35.707	332.780443
127.176778	342.32853	35.707	332.780443
127.176889	344.578809	35.707	332.780443
127.177	346.391975	35.707	332.780443
127.177111	348.214422	35.707	332.780443
127.176	353.641444	35.707111	333.998614
127.176111	351.473207	35.707111	333.998614
127.176222	349.191658	35.707111	333.998614
127.176333	347.439378	35.707111	333.998614
127.176556	343.712647	35.707111	333.998614
127.176778	342.32853	35.707111	333.998614
127.176889	344.578809	35.707111	333.998614
127.177	346.391975	35.707111	333.998614
127.177111	348.214422	35.707111	333.998614
127.176	353.641444	35.707222	339.171014
127.176111	351.473207	35.707222	339.171014
127.176222	349.191658	35.707222	339.171014
127.176333	347.439378	35.707222	339.171014
127.176556	343.712647	35.707222	339.171014
127.176778	342.32853	35.707222	339.171014
127.176889	344.578809	35.707222	339.171014
127.177	346.391975	35.707222	339.171014
127.177111	348.214422	35.707222	339.171014
127.176111	351.473207	35.707222	339.171014
127.176222	349.191658	35.707222	339.171014
127.176333	347.439378	35.707222	339.171014
127.176444	346.001234	35.707222	339.171014
127.176667	342.783407	35.707222	339.171014
127.176889	344.578809	35.707222	339.171014
127.177	346.391975	35.707222	339.171014
127.177111	348.214422	35.707222	339.171014
127.177222	347.235916	35.707222	339.171014
127.176111	351.473207	35.707333	344.061456
127.176222	349.191658	35.707333	344.061456
127.176333	347.439378	35.707333	344.061456
127.176444	346.001234	35.707333	344.061456
127.176667	342.783407	35.707333	344.061456
127.176889	344.578809	35.707333	344.061456
127.177	346.391975	35.707333	344.061456
127.177111	348.214422	35.707333	344.061456
127.177222	347.235916	35.707333	344.061456
127.176111	351.473207	35.707444	348.566541
127.176222	349.191658	35.707444	348.566541
127.176333	347.439378	35.707444	348.566541
127.176444	346.001234	35.707444	348.566541
127.176667	342.783407	35.707444	348.566541
127.176889	344.578809	35.707444	348.566541
127.177	346.391975	35.707444	348.566541
127.177111	348.214422	35.707444	348.566541
127.177222	347.235916	35.707444	348.566541
127.176111	351.473207	35.707556	353.839715
127.176222	349.191658	35.707556	353.839715
127.176333	347.439378	35.707556	353.839715
127.176444	346.001234	35.707556	353.839715
127.176667	342.783407	35.707556	353.839715
127.176889	344.578809	35.707556	353.839715
127.177	346.391975	35.707556	353.839715
127.177111	348.214422	35.707556	353.839715
127.177222	347.235916	35.707556	353.839715
127.176222	349.191658	35.707556	353.839715
127.176333	347.439378	35.707556	353.839715
127.176444	346.001234	35.707556	353.839715
127.176556	343.712647	35.707556	353.839715
127.176778	342.32853	35.707556	353.839715
127.177	346.391975	35.707556	353.839715
127.177111	348.214422	35.707556	353.839715
127.177222	347.235916	35.707556	353.839715
127.177333	341.384432	35.707556	353.839715
127.176222	349.191658	35.707667	359.41333
127.176333	347.439378	35.707667	359.41333
127.176444	346.001234	35.707667	359.41333
127.176556	343.712647	35.707667	359.41333
127.176778	342.32853	35.707667	359.41333
127.177	346.391975	35.707667	359.41333
127.177111	348.214422	35.707667	359.41333
127.177222	347.235916	35.707667	359.41333
127.177333	341.384432	35.707667	359.41333
127.176222	349.191658	35.707778	363.999735
127.176333	347.439378	35.707778	363.999735
127.176444	346.001234	35.707778	363.999735
127.176556	343.712647	35.707778	363.999735
127.176778	342.32853	35.707778	363.999735
127.177	346.391975	35.707778	363.999735
127.177111	348.214422	35.707778	363.999735
127.177222	347.235916	35.707778	363.999735
127.177333	341.384432	35.707778	363.999735
127.176222	349.191658	35.707889	365.681367
127.176333	347.439378	35.707889	365.681367
127.176444	346.001234	35.707889	365.681367
127.176556	343.712647	35.707889	365.681367
127.176778	342.32853	35.707889	365.681367
127.177	346.391975	35.707889	365.681367
127.177111	348.214422	35.707889	365.681367
127.177222	347.235916	35.707889	365.681367
127.177333	341.384432	35.707889	365.681367
127.176333	347.439378	35.707889	365.681367
127.176444	346.001234	35.707889	365.681367
127.176556	343.712647	35.707889	365.681367
127.176667	342.783407	35.707889	365.681367
127.176889	344.578809	35.707889	365.681367
127.177111	348.214422	35.707889	365.681367
127.177222	347.235916	35.707889	365.681367
127.177333	341.384432	35.707889	365.681367
127.177444	334.272595	35.707889	365.681367
127.176333	347.439378	35.708	364.357469
127.176444	346.001234	35.708	364.357469
127.176556	343.712647	35.708	364.357469
127.176667	342.783407	35.708	364.357469
127.176889	344.578809	35.708	364.357469
127.177111	348.214422	35.708	364.357469
127.177222	347.235916	35.708	364.357469
127.177333	341.384432	35.708	364.357469
127.177444	334.272595	35.708	364.357469
127.176333	347.439378	35.708111	360.844794
127.176444	346.001234	35.708111	360.844794
127.176556	343.712647	35.708111	360.844794
127.176667	342.783407	35.708111	360.844794
127.176889	344.578809	35.708111	360.844794
127.177111	348.214422	35.708111	360.844794
127.177222	347.235916	35.708111	360.844794
127.177333	341.384432	35.708111	360.844794
127.177444	334.272595	35.708111	360.844794
127.176333	347.439378	35.708222	354.536036
127.176444	346.001234	35.708222	354.536036
127.176556	343.712647	35.708222	354.536036
127.176667	342.783407	35.708222	354.536036
127.176889	344.578809	35.708222	354.536036
127.177111	348.214422	35.708222	354.536036
127.177222	347.235916	35.708222	354.536036
127.177333	341.384432	35.708222	354.536036
127.177444	334.272595	35.708222	354.536036
127.176444	346.001234	35.708222	354.536036
127.176556	343.712647	35.708222	354.536036
127.176667	342.783407	35.708222	354.536036
127.176778	342.32853	35.708222	354.536036
127.177	346.391975	35.708222	354.536036
127.177222	347.235916	35.708222	354.536036
127.177333	341.384432	35.708222	354.536036
127.177444	334.272595	35.708222	354.536036
127.177556	327.928408	35.708222	354.536036
127.176444	346.001234	35.708333	346.155307
127.176556	343.712647	35.708333	346.155307
127.176667	342.783407	35.708333	346.155307
127.176778	342.32853	35.708333	346.155307
127.177	346.391975	35.708333	346.155307
127.177222	347.235916	35.708333	346.155307
127.177333	341.384432	35.708333	346.155307
127.177444	334.272595	35.708333	346.155307
127.177556	327.928408	35.708333	346.155307
127.176444	346.001234	35.708444	339.989578
127.176556	343.712647	35.708444	339.989578
127.176667	342.783407	35.708444	339.989578
127.176778	342.32853	35.708444	339.989578
127.177	346.391975	35.708444	339.989578
127.177222	347.235916	35.708444	339.989578
127.177333	341.384432	35.708444	339.989578
127.177444	334.272595	35.708444	339.989578
127.177556	327.928408	35.708444	339.989578
127.176556	343.712647	35.708444	339.989578
127.176667	342.783407	35.708444	339.989578
127.176778	342.32853	35.708444	339.989578
127.176889	344.578809	35.708444	339.989578
127.177111	348.214422	35.708444	339.989578
127.177333	341.384432	35.708444	339.989578
127.177444	334.272595	35.708444	339.989578
127.177556	327.928408	35.708444	339.989578
127.177667	324.159939	35.708444	339.989578
127.176556	343.712647	35.708556	337.808243
127.176667	342.783407	35.708556	337.808243
127.176778	342.32853	35.708556	337.808243
127.176889	344.578809	35.708556	337.808243
127.177111	348.214422	35.708556	337.808243
127.177333	341.384432	35.708556	337.808243
127.177444	334.272595	35.708556	337.808243
127.177556	327.928408	35.708556	337.808243
127.177667	324.159939	35.708556	337.808243
127.176556	343.712647	35.708667	338.384487
127.176667	342.783407	35.708667	338.384487
127.176778	342.32853	35.708667	338.384487
127.176889	344.578809	35.708667	338.384487
127.177111	348.214422	35.708667	338.384487
127.177333	341.384432	35.708667	338.384487
127.177444	334.272595	35.708667	338.384487
127.177556	327.928408	35.708667	338.384487
127.177667	324.159939	35.708667	338.384487
127.176556	343.712647	35.708778	339.705397
127.176667	342.783407	35.708778	339.705397
127.176778	342.32853	35.708778	339.705397
127.176889	344.578809	35.708778	339.705397
127.177111	348.214422	35.708778	339.705397
127.177333	341.384432	35.708778	339.705397
127.177444	334.272595	35.708778	339.705397
127.177556	327.928408	35.708778	339.705397
127.177667	324.159939	35.708778	339.705397
127.176667	342.783407	35.708778	339.705397
127.176778	342.32853	35.708778	339.705397
127.176889	344.578809	35.708778	339.705397
127.177	346.391975	35.708778	339.705397
127.177222	347.235916	35.708778	339.705397
127.177444	334.272595	35.708778	339.705397
127.177556	327.928408	35.708778	339.705397
127.177667	324.159939	35.708778	339.705397
127.177778	321.402883	35.708778	339.705397
127.176667	342.783407	35.708889	340.174811
127.176778	342.32853	35.708889	340.174811
127.176889	344.578809	35.708889	340.174811
127.177	346.391975	35.708889	340.174811
127.177222	347.235916	35.708889	340.174811
127.177444	334.272595	35.708889	340.174811
127.177556	327.928408	35.708889	340.174811
127.177667	324.159939	35.708889	340.174811
127.177778	321.402883	35.708889	340.174811
127.176667	342.783407	35.709	340.605097
127.176778	342.32853	35.709	340.605097
127.176889	344.578809	35.709	340.605097
127.177	346.391975	35.709	340.605097
127.177222	347.235916	35.709	340.605097
127.177444	334.272595	35.709	340.605097
127.177556	327.928408	35.709	340.605097
127.177667	324.159939	35.709	340.605097
127.177778	321.402883	35.709	340.605097
127.176667	342.783407	35.709111	341.628457
127.176778	342.32853	35.709111	341.628457
127.176889	344.578809	35.709111	341.628457
127.177	346.391975	35.709111	341.628457
127.177222	347.235916	35.709111	341.628457
127.177444	334.272595	35.709111	341.628457
127.177556	327.928408	35.709111	341.628457
127.177667	324.159939	35.709111	341.628457
127.177778	321.402883	35.709111	341.628457
127.176778	342.32853	35.709111	341.628457
127.176889	344.578809	35.709111	341.628457
127.177	346.391975	35.709111	341.628457
127.177111	348.214422	35.709111	341.628457
127.177333	341.384432	35.709111	341.628457
127.177556	327.928408	35.709111	341.628457
127.177667	324.159939	35.709111	341.628457
127.177778	321.402883	35.709111	341.628457
127.177889	317.631586	35.709111	341.628457
127.176778	342.32853	35.709222	342.79955
127.176889	344.578809	35.709222	342.79955
127.177	346.391975	35.709222	342.79955
127.177111	348.214422	35.709222	342.79955
127.177333	341.384432	35.709222	342.79955
127.177556	327.928408	35.709222	342.79955
127.177667	324.159939	35.709222	342.79955
127.177778	321.402883	35.709222	342.79955
127.177889	317.631586	35.709222	342.79955
127.176778	342.32853	35.709333	342.817925
127.176889	344.578809	35.709333	342.817925
127.177	346.391975	35.709333	342.817925
127.177111	348.214422	35.709333	342.817925
127.177333	341.384432	35.709333	342.817925
127.177556	327.928408	35.709333	342.817925
127.177667	324.159939	35.709333	342.817925
127.177778	321.402883	35.709333	342.817925
127.177889	317.631586	35.709333	342.817925
127.176778	342.32853	35.709444	340.406426
127.176889	344.578809	35.709444	340.406426
127.177	346.391975	35.709444	340.406426
127.177111	348.214422	35.709444	340.406426
127.177333	341.384432	35.709444	340.406426
127.177556	327.928408	35.709444	340.406426
127.177667	324.159939	35.709444	340.406426
127.177778	321.402883	35.709444	340.406426
127.177889	317.631586	35.709444	340.406426
127.176889	344.578809	35.709444	340.406426
127.177	346.391975	35.709444	340.406426
127.177111	348.214422	35.709444	340.406426
127.177222	347.235916	35.709444	340.406426
127.177444	334.272595	35.709444	340.406426
127.177667	324.159939	35.709444	340.406426
127.177778	321.402883	35.709444	340.406426
127.177889	317.631586	35.709444	340.406426
127.178	314.440947	35.709444	340.406426
127.176889	344.578809	35.709556	337.308631
127.177	346.391975	35.709556	337.308631
127.177111	348.214422	35.709556	337.308631
127.177222	347.235916	35.709556	337.308631
127.177444	334.272595	35.709556	337.308631
127.177667	324.159939	35.709556	337.308631
127.177778	321.402883	35.709556	337.308631
127.177889	317.631586	35.709556	337.308631
127.178	314.440947	35.709556	337.308631
127.176889	344.578809	35.709667	335.407351
127.177	346.391975	35.709667	335.407351
127.177111	348.214422	35.709667	335.407351
127.177222	347.235916	35.709667	335.407351
127.177444	334.272595	35.709667	335.407351
127.177667	324.159939	35.709667	335.407351
127.177778	321.402883	35.709667	335.407351
127.177889	317.631586	35.709667	335.407351
127.178	314.440947	35.709667	335.407351
127.176889	344.578809	35.709778	334.508265
127.177	346.391975	35.709778	334.508265
127.177111	348.214422	35.709778	334.508265
127.177222	347.235916	35.709778	334.508265
127.177444	334.272595	35.709778	334.508265
127.177667	324.159939	35.709778	334.508265
127.177778	321.402883	35.709778	334.508265
127.177889	317.631586	35.709778	334.508265
127.178	314.440947	35.709778	334.508265
127.177	346.391975	35.709778	334.508265
127.177111	348.214422	35.709778	334.508265
127.177222	347.235916	35.709778	334.508265
127.177333	341.384432	35.709778	334.508265
127.177556	327.928408	35.709778	334.508265
127.177778	321.402883	35.709778	334.508265
127.177889	317.631586	35.709778	334.508265
127.178	314.440947	35.709778	334.508265
127.178111	308.853825	35.709778	334.508265
127.177	346.391975	35.709889	334.661541
127.177111	348.214422	35.709889	334.661541
127.177222	347.235916	35.709889	334.661541
127.177333	341.384432	35.709889	334.661541
127.177556	327.928408	35.709889	334.661541
127.177778	321.402883	35.709889	334.661541
127.177889	317.631586	35.709889	334.661541
127.178	314.440947	35.709889	334.661541
127.178111	308.853825	35.709889	334.661541
127.177	346.391975	35.71	336.441949
127.177111	348.214422	35.71	336.441949
127.177222	347.235916	35.71	336.441949
127.177333	341.384432	35.71	336.441949
127.177556	327.928408	35.71	336.441949
127.177778	321.402883	35.71	336.441949
127.177889	317.631586	35.71	336.441949
127.178	314.440947	35.71	336.441949
127.178111	308.853825	35.71	336.441949
127.177	346.391975	35.710111	339.941568
127.177111	348.214422	35.710111	339.941568
127.177222	347.235916	35.710111	339.941568
127.177333	341.384432	35.710111	339.941568
127.177556	327.928408	35.710111	339.941568
127.177778	321.402883	35.710111	339.941568
127.177889	317.631586	35.710111	339.941568
127.178	314.440947	35.710111	339.941568
127.178111	308.853825	35.710111	339.941568
127.177111	348.214422	35.710111	339.941568
127.177222	347.235916	35.710111	339.941568
127.177333	341.384432	35.710111	339.941568
127.177444	334.272595	35.710111	339.941568
127.177667	324.159939	35.710111	339.941568
127.177889	317.631586	35.710111	339.941568
127.178	314.440947	35.710111	339.941568
127.178111	308.853825	35.710111	339.941568
127.178222	300.241706	35.710111	339.941568
127.177111	348.214422	35.710222	344.319982
127.177222	347.235916	35.710222	344.319982
127.177333	341.384432	35.710222	344.319982
127.177444	334.272595	35.710222	344.319982
127.177667	324.159939	35.710222	344.319982
127.177889	317.631586	35.710222	344.319982
127.178	314.440947	35.710222	344.319982
127.178111	308.853825	35.710222	344.319982
127.178222	300.241706	35.710222	344.319982
127.177111	348.214422	35.710333	346.359994
127.177222	347.235916	35.710333	346.359994
127.177333	341.384432	35.710333	346.359994
127.177444	334.272595	35.710333	346.359994
127.177667	324.159939	35.710333	346.359994
127.177889	317.631586	35.710333	346.359994
127.178	314.440947	35.710333	346.359994
127.178111	308.853825	35.710333	346.359994
127.178222	300.241706	35.710333	346.359994
127.177111	348.214422	35.710444	344.303693
127.177222	347.235916	35.710444	344.303693
127.177333	341.384432	35.710444	344.303693
127.177444	334.272595	35.710444	344.303693
127.177667	324.159939	35.710444	344.303693
127.177889	317.631586	35.710444	344.303693
127.178	314.440947	35.710444	344.303693
127.178111	308.853825	35.710444	344.303693
127.178222	300.241706	35.710444	344.303693
127.177222	347.235916	35.710444	344.303693
127.177333	341.384432	35.710444	344.303693
127.177444	334.272595	35.710444	344.303693
127.177556	327.928408	35.710444	344.303693
127.177778	321.402883	35.710444	344.303693
127.178	314.440947	35.710444	344.303693
127.178111	308.853825	35.710444	344.303693
127.178222	300.241706	35.710444	344.303693
127.178333	288.457453	35.710444	344.303693
127.177222	347.235916	35.710556	339.718384
127.177333	341.384432	35.710556	339.718384
127.177444	334.272595	35.710556	339.718384
127.177556	327.928408	35.710556	339.718384
127.177778	321.402883	35.710556	339.718384
127.178	314.440947	35.710556	339.718384
127.178111	308.853825	35.710556	339.718384
127.178222	300.241706	35.710556	339.718384
127.178333	288.457453	35.710556	339.718384
127.177222	347.235916	35.710667	333.327696
127.177333	341.384432	35.710667	333.327696
127.177444	334.272595	35.710667	333.327696
127.177556	327.928408	35.710667	333.327696
127.177778	321.402883	35.710667	333.327696
127.178	314.440947	35.710667	333.327696
127.178111	308.853825	35.710667	333.327696
127.178222	300.241706	35.710667	333.327696
127.178333	288.457453	35.710667	333.327696
127.177222	347.235916	35.710778	325.189342
127.177333	341.384432	35.710778	325.189342
127.177444	334.272595	35.710778	325.189342
127.177556	327.928408	35.710778	325.189342
127.177778	321.402883	35.710778	325.189342
127.178	314.440947	35.710778	325.189342
127.178111	308.853825	35.710778	325.189342
127.178222	300.241706	35.710778	325.189342
127.178333	288.457453	35.710778	325.189342
127.177333	341.384432	35.710778	325.189342
127.177444	334.272595	35.710778	325.189342
127.177556	327.928408	35.710778	325.189342
127.177667	324.159939	35.710778	325.189342
127.177889	317.631586	35.710778	325.189342
127.178111	308.853825	35.710778	325.189342
127.178222	300.241706	35.710778	325.189342
127.178333	288.457453	35.710778	325.189342
127.178444	278.971698	35.710778	325.189342
127.177333	341.384432	35.710889	317.293104
127.177444	334.272595	35.710889	317.293104
127.177556	327.928408	35.710889	317.293104
127.177667	324.159939	35.710889	317.293104
127.177889	317.631586	35.710889	317.293104
127.178111	308.853825	35.710889	317.293104
127.178222	300.241706	35.710889	317.293104
127.178333	288.457453	35.710889	317.293104
127.178444	278.971698	35.710889	317.293104
127.177333	341.384432	35.711	311.300759
127.177444	334.272595	35.711	311.300759
127.177556	327.928408	35.711	311.300759
127.177667	324.159939	35.711	311.300759
127.177889	317.631586	35.711	311.300759
127.178111	308.853825	35.711	311.300759
127.178222	300.241706	35.711	311.300759
127.178333	288.457453	35.711	311.300759
127.178444	278.971698	35.711	311.300759
127.177444	334.272595	35.711111	306.383825
127.177556	327.928408	35.711111	306.383825
127.177667	324.159939	35.711111	306.383825
127.177778	321.402883	35.711111	306.383825
127.178	314.440947	35.711111	306.383825
127.178222	300.241706	35.711111	306.383825
127.178333	288.457453	35.711111	306.383825
127.178444	278.971698	35.711111	306.383825
127.178556	273.399281	35.711111	306.383825
127.177444	334.272595	35.711222	302.37186
127.177556	327.928408	35.711222	302.37186
127.177667	324.159939	35.711222	302.37186
127.177778	321.402883	35.711222	302.37186
127.178	314.440947	35.711222	302.37186
127.178222	300.241706	35.711222	302.37186
127.178333	288.457453	35.711222	302.37186
127.178444	278.971698	35.711222	302.37186
127.178556	273.399281	35.711222	302.37186
127.177444	334.272595	35.711333	300.367593
127.177556	327.928408	35.711333	300.367593
127.177667	324.159939	35.711333	300.367593
127.177778	321.402883	35.711333	300.367593
127.178	314.440947	35.711333	300.367593
127.178222	300.241706	35.711333	300.367593
127.178333	288.457453	35.711333	300.367593
127.178444	278.971698	35.711333	300.367593
127.178556	273.399281	35.711333	300.367593
127.177556	327.928408	35.711333	300.367593
127.177667	324.159939	35.711333	300.367593
127.177778	321.402883	35.711333	300.367593
127.177889	317.631586	35.711333	300.367593
127.178111	308.853825	35.711333	300.367593
127.178333	288.457453	35.711333	300.367593
127.178444	278.971698	35.711333	300.367593
127.178556	273.399281	35.711333	300.367593
127.178667	267.940506	35.711333	300.367593
127.177556	327.928408	35.711444	301.478774
127.177667	324.159939	35.711444	301.478774
127.177778	321.402883	35.711444	301.478774
127.177889	317.631586	35.711444	301.478774
127.178111	308.853825	35.711444	301.478774
127.178333	288.457453	35.711444	301.478774
127.178444	278.971698	35.711444	301.478774
127.178556	273.399281	35.711444	301.478774
127.178667	267.940506	35.711444	301.478774
127.177556	327.928408	35.711556	306.029817
127.177667	324.159939	35.711556	306.029817
127.177778	321.402883	35.711556	306.029817
127.177889	317.631586	35.711556	306.029817
127.178111	308.853825	35.711556	306.029817
127.178333	288.457453	35.711556	306.029817
127.178444	278.971698	35.711556	306.029817
127.178556	273.399281	35.711556	306.029817
127.178667	267.940506	35.711556	306.029817
127.177556	327.928408	35.711667	311.314636
127.177667	324.159939	35.711667	311.314636
127.177778	321.402883	35.711667	311.314636
127.177889	317.631586	35.711667	311.314636
127.178111	308.853825	35.711667	311.314636
127.178333	288.457453	35.711667	311.314636
127.178444	278.971698	35.711667	311.314636
127.178556	273.399281	35.711667	311.314636
127.178667	267.940506	35.711667	311.314636
127.177667	324.159939	35.711667	311.314636
127.177778	321.402883	35.711667	311.314636
127.177889	317.631586	35.711667	311.314636
127.178	314.440947	35.711667	311.314636
127.178222	300.241706	35.711667	311.314636
127.178444	278.971698	35.711667	311.314636
127.178556	273.399281	35.711667	311.314636
127.178667	267.940506	35.711667	311.314636
127.178778	262.756549	35.711667	311.314636
127.177667	324.159939	35.711778	314.647169
127.177778	321.402883	35.711778	314.647169
127.177889	317.631586	35.711778	314.647169
127.178	314.440947	35.711778	314.647169
127.178222	300.241706	35.711778	314.647169
127.178444	278.971698	35.711778	314.647169
127.178556	273.399281	35.711778	314.647169
127.178667	267.940506	35.711778	314.647169
127.178778	262.756549	35.711778	314.647169
127.177667	324.159939	35.711889	314.803016
127.177778	321.402883	35.711889	314.803016
127.177889	317.631586	35.711889	314.803016
127.178	314.440947	35.711889	314.803016
127.178222	300.241706	35.711889	314.803016
127.178444	278.971698	35.711889	314.803016
127.178556	273.399281	35.711889	314.803016
127.178667	267.940506	35.711889	314.803016
127.178778	262.756549	35.711889	314.803016
127.177667	324.159939	35.712	311.858067
127.177778	321.402883	35.712	311.858067
127.177889	317.631586	35.712	311.858067
127.178	314.440947	35.712	311.858067
127.178222	300.241706	35.712	311.858067
127.178444	278.971698	35.712	311.858067
127.178556	273.399281	35.712	311.858067
127.178667	267.940506	35.712	311.858067
127.178778	262.756549	35.712	311.858067
127.177778	321.402883	35.712	311.858067
127.177889	317.631586	35.712	311.858067
127.178	314.440947	35.712	311.858067
127.178111	308.853825	35.712	311.858067
127.178333	288.457453	35.712	311.858067
127.178556	273.399281	35.712	311.858067
127.178667	267.940506	35.712	311.858067
127.178778	262.756549	35.712	311.858067
127.178889	256.587761	35.712	311.858067
127.177778	321.402883	35.712111	306.779122
127.177889	317.631586	35.712111	306.779122
127.178	314.440947	35.712111	306.779122
127.178111	308.853825	35.712111	306.779122
127.178333	288.457453	35.712111	306.779122
127.178556	273.399281	35.712111	306.779122
127.178667	267.940506	35.712111	306.779122
127.178778	262.756549	35.712111	306.779122
127.178889	256.587761	35.712111	306.779122
127.177778	321.402883	35.712222	300.047878
127.177889	317.631586	35.712222	300.047878
127.178	314.440947	35.712222	300.047878
127.178111	308.853825	35.712222	300.047878
127.178333	288.457453	35.712222	300.047878
127.178556	273.399281	35.712222	300.047878
127.178667	267.940506	35.712222	300.047878
127.178778	262.756549	35.712222	300.047878
127.178889	256.587761	35.712222	300.047878
127.177778	321.402883	35.712333	292.356057
127.177889	317.631586	35.712333	292.356057
127.178	314.440947	35.712333	292.356057
127.178111	308.853825	35.712333	292.356057
127.178333	288.457453	35.712333	292.356057
127.178556	273.399281	35.712333	292.356057
127.178667	267.940506	35.712333	292.356057
127.178778	262.756549	35.712333	292.356057
127.178889	256.587761	35.712333	292.356057
127.177889	317.631586	35.712333	292.356057
127.178	314.440947	35.712333	292.356057
127.178111	308.853825	35.712333	292.356057
127.178222	300.241706	35.712333	292.356057
127.178444	278.971698	35.712333	292.356057
127.178667	267.940506	35.712333	292.356057
127.178778	262.756549	35.712333	292.356057
127.178889	256.587761	35.712333	292.356057
127.179	253.541802	35.712333	292.356057
127.177889	317.631586	35.712444	285.762572
127.178	314.440947	35.712444	285.762572
127.178111	308.853825	35.712444	285.762572
127.178222	300.241706	35.712444	285.762572
127.178444	278.971698	35.712444	285.762572
127.178667	267.940506	35.712444	285.762572
127.178778	262.756549	35.712444	285.762572
127.178889	256.587761	35.712444	285.762572
127.179	253.541802	35.712444	285.762572
127.177889	317.631586	35.712556	280.731499
127.178	314.440947	35.712556	280.731499
127.178111	308.853825	35.712556	280.731499
127.178222	300.241706	35.712556	280.731499
127.178444	278.971698	35.712556	280.731499
127.178667	267.940506	35.712556	280.731499
127.178778	262.756549	35.712556	280.731499
127.178889	256.587761	35.712556	280.731499
127.179	253.541802	35.712556	280.731499
127.177889	317.631586	35.712667	275.526252
127.178	314.440947	35.712667	275.526252
127.178111	308.853825	35.712667	275.526252
127.178222	300.241706	35.712667	275.526252
127.178444	278.971698	35.712667	275.526252
127.178667	267.940506	35.712667	275.526252
127.178778	262.756549	35.712667	275.526252
127.178889	256.587761	35.712667	275.526252
127.179	253.541802	35.712667	275.526252
127.178	314.440947	35.712667	275.526252
127.178111	308.853825	35.712667	275.526252
127.178222	300.241706	35.712667	275.526252
127.178333	288.457453	35.712667	275.526252
127.178556	273.399281	35.712667	275.526252
127.178778	262.756549	35.712667	275.526252
127.178889	256.587761	35.712667	275.526252
127.179	253.541802	35.712667	275.526252
127.179111	252.845876	35.712667	275.526252
127.178	314.440947	35.712778	270.004499
127.178111	308.853825	35.712778	270.004499
127.178222	300.241706	35.712778	270.004499
127.178333	288.457453	35.712778	270.004499
127.178556	273.399281	35.712778	270.004499
127.178778	262.756549	35.712778	270.004499
127.178889	256.587761	35.712778	270.004499
127.179	253.541802	35.712778	270.004499
127.179111	252.845876	35.712778	270.004499
127.178	314.440947	35.712889	264.981994
127.178111	308.853825	35.712889	264.981994
127.178222	300.241706	35.712889	264.981994
127.178333	288.457453	35.712889	264.981994
127.178556	273.399281	35.712889	264.981994
127.178778	262.756549	35.712889	264.981994
127.178889	256.587761	35.712889	264.981994
127.179	253.541802	35.712889	264.981994
127.179111	252.845876	35.712889	264.981994
127.178111	308.853825	35.712889	264.981994
127.178222	300.241706	35.712889	264.981994
127.178333	288.457453	35.712889	264.981994
127.178444	278.971698	35.712889	264.981994
127.178667	267.940506	35.712889	264.981994
127.178889	256.587761	35.712889	264.981994
127.179	253.541802	35.712889	264.981994
127.179111	252.845876	35.712889	264.981994
127.179222	252.70449	35.712889	264.981994
127.178111	308.853825	35.713	260.706408
127.178222	300.241706	35.713	260.706408
127.178333	288.457453	35.713	260.706408
127.178444	278.971698	35.713	260.706408
127.178667	267.940506	35.713	260.706408
127.178889	256.587761	35.713	260.706408
127.179	253.541802	35.713	260.706408
127.179111	252.845876	35.713	260.706408
127.179222	252.70449	35.713	260.706408
127.178111	308.853825	35.713111	257.36789
127.178222	300.241706	35.713111	257.36789
127.178333	288.457453	35.713111	257.36789
127.178444	278.971698	35.713111	257.36789
127.178667	267.940506	35.713111	257.36789
127.178889	256.587761	35.713111	257.36789
127.179	253.541802	35.713111	257.36789
127.179111	252.845876	35.713111	257.36789
127.179222	252.70449	35.713111	257.36789
127.178111	308.853825	35.713222	255.460608
127.178222	300.241706	35.713222	255.460608
127.178333	288.457453	35.713222	255.460608
127.178444	278.971698	35.713222	255.460608
127.178667	267.940506	35.713222	255.460608
127.178889	256.587761	35.713222	255.460608
127.179	253.541802	35.713222	255.460608
127.179111	252.845876	35.713222	255.460608
127.179222	252.70449	35.713222	255.460608
127.178222	300.241706	35.713222	255.460608
127.178333	288.457453	35.713222	255.460608
127.178444	278.971698	35.713222	255.460608
127.178556	273.399281	35.713222	255.460608
127.178778	262.756549	35.713222	255.460608
127.179	253.541802	35.713222	255.460608
127.179111	252.845876	35.713222	255.460608
127.179222	252.70449	35.713222	255.460608
127.179333	253.27307	35.713222	255.460608
127.178222	300.241706	35.713333	254.764015
127.178333	288.457453	35.713333	254.764015
127.178444	278.971698	35.713333	254.764015
127.178556	273.399281	35.713333	254.764015
127.178778	262.756549	35.713333	254.764015
127.179	253.541802	35.713333	254.764015
127.179111	252.845876	35.713333	254.764015
127.179222	252.70449	35.713333	254.764015
127.179333	253.27307	35.713333	254.764015
127.178222	300.241706	35.713444	254.438863
127.178333	288.457453	35.713444	254.438863
127.178444	278.971698	35.713444	254.438863
127.178556	273.399281	35.713444	254.438863
127.178778	262.756549	35.713444	254.438863
127.179	253.541802	35.713444	254.438863
127.179111	252.845876	35.713444	254.438863
127.179222	252.70449	35.713444	254.438863
127.179333	253.27307	35.713444	254.438863
127.178222	300.241706	35.713556	254.230351
127.178333	288.457453	35.713556	254.230351
127.178444	278.971698	35.713556	254.230351
127.178556	273.399281	35.713556	254.230351
127.178778	262.756549	35.713556	254.230351
127.179	253.541802	35.713556	254.230351
127.179111	252.845876	35.713556	254.230351
127.179222	252.70449	35.713556	254.230351
127.179333	253.27307	35.713556	254.230351
127.178333	288.457453	35.713556	254.230351
127.178444	278.971698	35.713556	254.230351
127.178556	273.399281	35.713556	254.230351
127.178667	267.940506	35.713556	254.230351
127.178889	256.587761	35.713556	254.230351
127.179111	252.845876	35.713556	254.230351
127.179222	252.70449	35.713556	254.230351
127.179333	253.27307	35.713556	254.230351
127.179444	254.302166	35.713556	254.230351
127.178333	288.457453	35.713667	254.111812
127.178444	278.971698	35.713667	254.111812
127.178556	273.399281	35.713667	254.111812
127.178667	267.940506	35.713667	254.111812
127.178889	256.587761	35.713667	254.111812
127.179111	252.845876	35.713667	254.111812
127.179222	252.70449	35.713667	254.111812
127.179333	253.27307	35.713667	254.111812
127.179444	254.302166	35.713667	254.111812
127.178333	288.457453	35.713778	253.882399
127.178444	278.971698	35.713778	253.882399
127.178556	273.399281	35.713778	253.882399
127.178667	267.940506	35.713778	253.882399
127.178889	256.587761	35.713778	253.882399
127.179111	252.845876	35.713778	253.882399
127.179222	252.70449	35.713778	253.882399
127.179333	253.27307	35.713778	253.882399
127.179444	254.302166	35.713778	253.882399
127.178333	288.457453	35.713889	253.584859
127.178444	278.971698	35.713889	253.584859
127.178556	273.399281	35.713889	253.584859
127.178667	267.940506	35.713889	253.584859
127.178889	256.587761	35.713889	253.584859
127.179111	252.845876	35.713889	253.584859
127.179222	252.70449	35.713889	253.584859
127.179333	253.27307	35.713889	253.584859
127.179444	254.302166	35.713889	253.584859
127.178444	278.971698	35.713889	253.584859
127.178556	273.399281	35.713889	253.584859
127.178667	267.940506	35.713889	253.584859
127.178778	262.756549	35.713889	253.584859
127.179	253.541802	35.713889	253.584859
127.179222	252.70449	35.713889	253.584859
127.179333	253.27307	35.713889	253.584859
127.179444	254.302166	35.713889	253.584859
127.179556	256.756786	35.713889	253.584859
127.178444	278.971698	35.714	253.630087
127.178556	273.399281	35.714	253.630087
127.178667	267.940506	35.714	253.630087
127.178778	262.756549	35.714	253.630087
127.179	253.541802	35.714	253.630087
127.179222	252.70449	35.714	253.630087
127.179333	253.27307	35.714	253.630087
127.179444	254.302166	35.714	253.630087
127.179556	256.756786	35.714	253.630087
127.178444	278.971698	35.714111	253.885429
127.178556	273.399281	35.714111	253.885429
127.178667	267.940506	35.714111	253.885429
127.178778	262.756549	35.714111	253.885429
127.179	253.541802	35.714111	253.885429
127.179222	252.70449	35.714111	253.885429
127.179333	253.27307	35.714111	253.885429
127.179444	254.302166	35.714111	253.885429
127.179556	256.756786	35.714111	253.885429
127.178556	273.399281	35.714111	253.885429
127.178667	267.940506	35.714111	253.885429
127.178778	262.756549	35.714111	253.885429
127.178889	256.587761	35.714111	253.885429
127.179111	252.845876	35.714111	253.885429
127.179333	253.27307	35.714111	253.885429
127.179444	254.302166	35.714111	253.885429
127.179556	256.756786	35.714111	253.885429
127.179667	258.759771	35.714111	253.885429
127.178556	273.399281	35.714222	253.885213
127.178667	267.940506	35.714222	253.885213
127.178778	262.756549	35.714222	253.885213
127.178889	256.587761	35.714222	253.885213
127.179111	252.845876	35.714222	253.885213
127.179333	253.27307	35.714222	253.885213
127.179444	254.302166	35.714222	253.885213
127.179556	256.756786	35.714222	253.885213
127.179667	258.759771	35.714222	253.885213
127.178556	273.399281	35.714333	253.524516
127.178667	267.940506	35.714333	253.524516
127.178778	262.756549	35.714333	253.524516
127.178889	256.587761	35.714333	253.524516
127.179111	252.845876	35.714333	253.524516
127.179333	253.27307	35.714333	253.524516
127.179444	254.302166	35.714333	253.524516
127.179556	256.756786	35.714333	253.524516
127.179667	258.759771	35.714333	253.524516
127.178556	273.399281	35.714445	252.907628
127.178667	267.940506	35.714445	252.907628
127.178778	262.756549	35.714445	252.907628
127.178889	256.587761	35.714445	252.907628
127.179111	252.845876	35.714445	252.907628
127.179333	253.27307	35.714445	252.907628
127.179444	254.302166	35.714445	252.907628
127.179556	256.756786	35.714445	252.907628
127.179667	258.759771	35.714445	252.907628
127.178667	267.940506	35.714445	252.907628
127.178778	262.756549	35.714445	252.907628
127.178889	256.587761	35.714445	252.907628
127.179	253.541802	35.714445	252.907628
127.179222	252.70449	35.714445	252.907628
127.179444	254.302166	35.714445	252.907628
127.179556	256.756786	35.714445	252.907628
127.179667	258.759771	35.714445	252.907628
127.179778	258.631148	35.714445	252.907628
127.178667	267.940506	35.714556	252.333151
127.178778	262.756549	35.714556	252.333151
127.178889	256.587761	35.714556	252.333151
127.179	253.541802	35.714556	252.333151
127.179222	252.70449	35.714556	252.333151
127.179444	254.302166	35.714556	252.333151
127.179556	256.756786	35.714556	252.333151
127.179667	258.759771	35.714556	252.333151
127.179778	258.631148	35.714556	252.333151
127.178667	267.940506	35.714667	251.82084
127.178778	262.756549	35.714667	251.82084
127.178889	256.587761	35.714667	251.82084
127.179	253.541802	35.714667	251.82084
127.179222	252.70449	35.714667	251.82084
127.179444	254.302166	35.714667	251.82084
127.179556	256.756786	35.714667	251.82084
127.179667	258.759771	35.714667	251.82084
127.179778	258.631148	35.714667	251.82084
127.178667	267.940506	35.714778	251.128709
127.178778	262.756549	35.714778	251.128709
127.178889	256.587761	35.714778	251.128709
127.179	253.541802	35.714778	251.128709
127.179222	252.70449	35.714778	251.128709
127.179444	254.302166	35.714778	251.128709
127.179556	256.756786	35.714778	251.128709
127.179667	258.759771	35.714778	251.128709
127.179778	258.631148	35.714778	251.128709
127.178778	262.756549	35.714778	251.128709
127.178889	256.587761	35.714778	251.128709
127.179	253.541802	35.714778	251.128709
127.179111	252.845876	35.714778	251.128709
127.179333	253.27307	35.714778	251.128709
127.179556	256.756786	35.714778	251.128709
127.179667	258.759771	35.714778	251.128709
127.179778	258.631148	35.714778	251.128709
127.179889	259.886517	35.714778	251.128709
127.178778	262.756549	35.714889	250.476459
127.178889	256.587761	35.714889	250.476459
127.179	253.541802	35.714889	250.476459
127.179111	252.845876	35.714889	250.476459
127.179333	253.27307	35.714889	250.476459
127.179556	256.756786	35.714889	250.476459
127.179667	258.759771	35.714889	250.476459
127.179778	258.631148	35.714889	250.476459
127.179889	259.886517	35.714889	250.476459
127.178778	262.756549	35.715	250.19244
127.178889	256.587761	35.715	250.19244
127.179	253.541802	35.715	250.19244
127.179111	252.845876	35.715	250.19244
127.179333	253.27307	35.715	250.19244
127.179556	256.756786	35.715	250.19244
127.179667	258.759771	35.715	250.19244
127.179778	258.631148	35.715	250.19244
127.179889	259.886517	35.715	250.19244
127.178889	256.587761	35.715	250.19244
127.179	253.541802	35.715	250.19244
127.179111	252.845876	35.715	250.19244
127.179222	252.70449	35.715	250.19244
127.179444	254.302166	35.715	250.19244
127.179667	258.759771	35.715	250.19244
127.179778	258.631148	35.715	250.19244
127.179889	259.886517	35.715	250.19244
127.18	260.409954	35.715	250.19244
127.178889	256.587761	35.715111	250.111098
127.179	253.541802	35.715111	250.111098
127.179111	252.845876	35.715111	250.111098
127.179222	252.70449	35.715111	250.111098
127.179444	254.302166	35.715111	250.111098
127.179667	258.759771	35.715111	250.111098
127.179778	258.631148	35.715111	250.111098
127.179889	259.886517	35.715111	250.111098
127.18	260.409954	35.715111	250.111098
127.178889	256.587761	35.715222	250.117416
127.179	253.541802	35.715222	250.117416
127.179111	252.845876	35.715222	250.117416
127.179222	252.70449	35.715222	250.117416
127.179444	254.302166	35.715222	250.117416
127.179667	258.759771	35.715222	250.117416
127.179778	258.631148	35.715222	250.117416
127.179889	259.886517	35.715222	250.117416
127.18	260.409954	35.715222	250.117416
127.178889	256.587761	35.715333	250.338653
127.179	253.541802	35.715333	250.338653
127.179111	252.845876	35.715333	250.338653
127.179222	252.70449	35.715333	250.338653
127.179444	254.302166	35.715333	250.338653
127.179667	258.759771	35.715333	250.338653
127.179778	258.631148	35.715333	250.338653
127.179889	259.886517	35.715333	250.338653
127.18	260.409954	35.715333	250.338653
127.179	253.541802	35.715333	250.338653
127.179111	252.845876	35.715333	250.338653
127.179222	252.70449	35.715333	250.338653
127.179333	253.27307	35.715333	250.338653
127.179556	256.756786	35.715333	250.338653
127.179778	258.631148	35.715333	250.338653
127.179889	259.886517	35.715333	250.338653
127.18	260.409954	35.715333	250.338653
127.180111	261.710752	35.715333	250.338653
127.179	253.541802	35.715445	250.7074
127.179111	252.845876	35.715445	250.7074
127.179222	252.70449	35.715445	250.7074
127.179333	253.27307	35.715445	250.7074
127.179556	256.756786	35.715445	250.7074
127.179778	258.631148	35.715445	250.7074
127.179889	259.886517	35.715445	250.7074
127.18	260.409954	35.715445	250.7074
127.180111	261.710752	35.715445	250.7074
127.179	253.541802	35.715556	251.02296
127.179111	252.845876	35.715556	251.02296
127.179222	252.70449	35.715556	251.02296
127.179333	253.27307	35.715556	251.02296
127.179556	256.756786	35.715556	251.02296
127.179778	258.631148	35.715556	251.02296
127.179889	259.886517	35.715556	251.02296
127.18	260.409954	35.715556	251.02296
127.180111	261.710752	35.715556	251.02296
127.179	253.541802	35.715667	251.299197
127.179111	252.845876	35.715667	251.299197
127.179222	252.70449	35.715667	251.299197
127.179333	253.27307	35.715667	251.299197
127.179556	256.756786	35.715667	251.299197
127.179778	258.631148	35.715667	251.299197
127.179889	259.886517	35.715667	251.299197
127.18	260.409954	35.715667	251.299197
127.180111	261.710752	35.715667	251.299197
127.179111	252.845876	35.715667	251.299197
127.179222	252.70449	35.715667	251.299197
127.179333	253.27307	35.715667	251.299197
127.179444	254.302166	35.715667	251.299197
127.179667	258.759771	35.715667	251.299197
127.179889	259.886517	35.715667	251.299197
127.18	260.409954	35.715667	251.299197
127.180111	261.710752	35.715667	251.299197
127.180222	263.066278	35.715667	251.299197
127.179111	252.845876	35.715778	251.643199
127.179222	252.70449	35.715778	251.643199
127.179333	253.27307	35.715778	251.643199
127.179444	254.302166	35.715778	251.643199
127.179667	258.759771	35.715778	251.643199
127.179889	259.886517	35.715778	251.643199
127.18	260.409954	35.715778	251.643199
127.180111	261.710752	35.715778	251.643199
127.180222	263.066278	35.715778	251.643199
127.179111	252.845876	35.715889	252.202981
127.179222	252.70449	35.715889	252.202981
127.179333	253.27307	35.715889	252.202981
127.179444	254.302166	35.715889	252.202981
127.179667	258.759771	35.715889	252.202981
127.179889	259.886517	35.715889	252.202981
127.18	260.409954	35.715889	252.202981
127.180111	261.710752	35.715889	252.202981
127.180222	263.066278	35.715889	252.202981
127.179222	252.70449	35.715889	252.202981
127.179333	253.27307	35.715889	252.202981
127.179444	254.302166	35.715889	252.202981
127.179556	256.756786	35.715889	252.202981
127.179778	258.631148	35.715889	252.202981
127.18	260.409954	35.715889	252.202981
127.180111	261.710752	35.715889	252.202981
127.180222	263.066278	35.715889	252.202981
127.180333	264.047548	35.715889	252.202981
127.179222	252.70449	35.716	252.93309
127.179333	253.27307	35.716	252.93309
127.179444	254.302166	35.716	252.93309
127.179556	256.756786	35.716	252.93309
127.179778	258.631148	35.716	252.93309
127.18	260.409954	35.716	252.93309
127.180111	261.710752	35.716	252.93309
127.180222	263.066278	35.716	252.93309
127.180333	264.047548	35.716	252.93309
127.179222	252.70449	35.716111	253.586679
127.179333	253.27307	35.716111	253.586679
127.179444	254.302166	35.716111	253.586679
127.179556	256.756786	35.716111	253.586679
127.179778	258.631148	35.716111	253.586679
127.18	260.409954	35.716111	253.586679
127.180111	261.710752	35.716111	253.586679
127.180222	263.066278	35.716111	253.586679
127.180333	264.047548	35.716111	253.586679
127.179222	252.70449	35.716222	254.142558
127.179333	253.27307	35.716222	254.142558
127.179444	254.302166	35.716222	254.142558
127.179556	256.756786	35.716222	254.142558
127.179778	258.631148	35.716222	254.142558
127.18	260.409954	35.716222	254.142558
127.180111	261.710752	35.716222	254.142558
127.180222	263.066278	35.716222	254.142558
127.180333	264.047548	35.716222	254.142558
127.179333	253.27307	35.716222	254.142558
127.179444	254.302166	35.716222	254.142558
127.179556	256.756786	35.716222	254.142558
127.179667	258.759771	35.716222	254.142558
127.179889	259.886517	35.716222	254.142558
127.180111	261.710752	35.716222	254.142558
127.180222	263.066278	35.716222	254.142558
127.180333	264.047548	35.716222	254.142558
127.180444	265.484908	35.716222	254.142558
127.179333	253.27307	35.716333	254.738459
127.179444	254.302166	35.716333	254.738459
127.179556	256.756786	35.716333	254.738459
127.179667	258.759771	35.716333	254.738459
127.179889	259.886517	35.716333	254.738459
127.180111	261.710752	35.716333	254.738459
127.180222	263.066278	35.716333	254.738459
127.180333	264.047548	35.716333	254.738459
127.180444	265.484908	35.716333	254.738459
127.179333	253.27307	35.716444	255.608308
127.179444	254.302166	35.716444	255.608308
127.179556	256.756786	35.716444	255.608308
127.179667	258.759771	35.716444	255.608308
127.179889	259.886517	35.716444	255.608308
127.180111	261.710752	35.716444	255.608308
127.180222	263.066278	35.716444	255.608308
127.180333	264.047548	35.716444	255.608308
127.180444	265.484908	35.716444	255.608308
127.179333	253.27307	35.716556	256.975302
127.179444	254.302166	35.716556	256.975302
127.179556	256.756786	35.716556	256.975302
127.179667	258.759771	35.716556	256.975302
127.179889	259.886517	35.716556	256.975302
127.180111	261.710752	35.716556	256.975302
127.180222	263.066278	35.716556	256.975302
127.180333	264.047548	35.716556	256.975302
127.180444	265.484908	35.716556	256.975302
127.179444	254.302166	35.716556	256.975302
127.179556	256.756786	35.716556	256.975302
127.179667	258.759771	35.716556	256.975302
127.179778	258.631148	35.716556	256.975302
127.18	260.409954	35.716556	256.975302
127.180222	263.066278	35.716556	256.975302
127.180333	264.047548	35.716556	256.975302
127.180444	265.484908	35.716556	256.975302
127.180556	266.699822	35.716556	256.975302
127.179444	254.302166	35.716667	258.988815
127.179556	256.756786	35.716667	258.988815
127.179667	258.759771	35.716667	258.988815
127.179778	258.631148	35.716667	258.988815
127.18	260.409954	35.716667	258.988815
127.180222	263.066278	35.716667	258.988815
127.180333	264.047548	35.716667	258.988815
127.180444	265.484908	35.716667	258.988815
127.180556	266.699822	35.716667	258.988815
127.179444	254.302166	35.716778	261.223798
127.179556	256.756786	35.716778	261.223798
127.179667	258.759771	35.716778	261.223798
127.179778	258.631148	35.716778	261.223798
127.18	260.409954	35.716778	261.223798
127.180222	263.066278	35.716778	261.223798
127.180333	264.047548	35.716778	261.223798
127.180444	265.484908	35.716778	261.223798
127.180556	266.699822	35.716778	261.223798
127.179556	256.756786	35.716778	261.223798
127.179667	258.759771	35.716778	261.223798
127.179778	258.631148	35.716778	261.223798
127.179889	259.886517	35.716778	261.223798
127.180111	261.710752	35.716778	261.223798
127.180333	264.047548	35.716778	261.223798
127.180444	265.484908	35.716778	261.223798
127.180556	266.699822	35.716778	261.223798
127.180667	267.156943	35.716778	261.223798
127.179556	256.756786	35.716889	262.895293
127.179667	258.759771	35.716889	262.895293
127.179778	258.631148	35.716889	262.895293
127.179889	259.886517	35.716889	262.895293
127.180111	261.710752	35.716889	262.895293
127.180333	264.047548	35.716889	262.895293
127.180444	265.484908	35.716889	262.895293
127.180556	266.699822	35.716889	262.895293
127.180667	267.156943	35.716889	262.895293
127.179556	256.756786	35.717	263.848095
127.179667	258.759771	35.717	263.848095
127.179778	258.631148	35.717	263.848095
127.179889	259.886517	35.717	263.848095
127.180111	261.710752	35.717	263.848095
127.180333	264.047548	35.717	263.848095
127.180444	265.484908	35.717	263.848095
127.180556	266.699822	35.717	263.848095
127.180667	267.156943	35.717	263.848095
127.179556	256.756786	35.717111	264.268502
127.179667	258.759771	35.717111	264.268502
127.179778	258.631148	35.717111	264.268502
127.179889	259.886517	35.717111	264.268502
127.180111	261.710752	35.717111	264.268502
127.180333	264.047548	35.717111	264.268502
127.180444	265.484908	35.717111	264.268502
127.180556	266.699822	35.717111	264.268502
127.180667	267.156943	35.717111	264.268502
127.179667	258.759771	35.717111	264.268502
127.179778	258.631148	35.717111	264.268502
127.179889	259.886517	35.717111	264.268502
127.18	260.409954	35.717111	264.268502
127.180222	263.066278	35.717111	264.268502
127.180444	265.484908	35.717111	264.268502
127.180556	266.699822	35.717111	264.268502
127.180667	267.156943	35.717111	264.268502
127.180778	268.102479	35.717111	264.268502
127.179667	258.759771	35.717222	264.549731
127.179778	258.631148	35.717222	264.549731
127.179889	259.886517	35.717222	264.549731
127.18	260.409954	35.717222	264.549731
127.180222	263.066278	35.717222	264.549731
127.180444	265.484908	35.717222	264.549731
127.180556	266.699822	35.717222	264.549731
127.180667	267.156943	35.717222	264.549731
127.180778	268.102479	35.717222	264.549731
127.179667	258.759771	35.717333	264.869977
127.179778	258.631148	35.717333	264.869977
127.179889	259.886517	35.717333	264.869977
127.18	260.409954	35.717333	264.869977
127.180222	263.066278	35.717333	264.869977
127.180444	265.484908	35.717333	264.869977
127.180556	266.699822	35.717333	264.869977
127.180667	267.156943	35.717333	264.869977
127.180778	268.102479	35.717333	264.869977
127.179667	258.759771	35.717444	265.106484
127.179778	258.631148	35.717444	265.106484
127.179889	259.886517	35.717444	265.106484
127.18	260.409954	35.717444	265.106484
127.180222	263.066278	35.717444	265.106484
127.180444	265.484908	35.717444	265.106484
127.180556	266.699822	35.717444	265.106484
127.180667	267.156943	35.717444	265.106484
127.180778	268.102479	35.717444	265.106484
127.179778	258.631148	35.717444	265.106484
127.179889	259.886517	35.717444	265.106484
127.18	260.409954	35.717444	265.106484
127.180111	261.710752	35.717444	265.106484
127.180333	264.047548	35.717444	265.106484
127.180556	266.699822	35.717444	265.106484
127.180667	267.156943	35.717444	265.106484
127.180778	268.102479	35.717444	265.106484
127.180889	269.574072	35.717444	265.106484
127.179778	258.631148	35.717555	265.29168
127.179889	259.886517	35.717555	265.29168
127.18	260.409954	35.717555	265.29168
127.180111	261.710752	35.717555	265.29168
127.180333	264.047548	35.717555	265.29168
127.180556	266.699822	35.717555	265.29168
127.180667	267.156943	35.717555	265.29168
127.180778	268.102479	35.717555	265.29168
127.180889	269.574072	35.717555	265.29168
127.179778	258.631148	35.717667	265.568681
127.179889	259.886517	35.717667	265.568681
127.18	260.409954	35.717667	265.568681
127.180111	261.710752	35.717667	265.568681
127.180333	264.047548	35.717667	265.568681
127.180556	266.699822	35.717667	265.568681
127.180667	267.156943	35.717667	265.568681
127.180778	268.102479	35.717667	265.568681
127.180889	269.574072	35.717667	265.568681
127.179889	259.886517	35.717667	265.568681
127.18	260.409954	35.717667	265.568681
127.180111	261.710752	35.717667	265.568681
127.180222	263.066278	35.717667	265.568681
127.180444	265.484908	35.717667	265.568681
127.180667	267.156943	35.717667	265.568681
127.180778	268.102479	35.717667	265.568681
127.180889	269.574072	35.717667	265.568681
127.181	270.562482	35.717667	265.568681
127.179889	259.886517	35.717778	266.076111
127.18	260.409954	35.717778	266.076111
127.180111	261.710752	35.717778	266.076111
127.180222	263.066278	35.717778	266.076111
127.180444	265.484908	35.717778	266.076111
127.180667	267.156943	35.717778	266.076111
127.180778	268.102479	35.717778	266.076111
127.180889	269.574072	35.717778	266.076111
127.181	270.562482	35.717778	266.076111
127.179889	259.886517	35.717889	266.774437
127.18	260.409954	35.717889	266.774437
127.180111	261.710752	35.717889	266.774437
127.180222	263.066278	35.717889	266.774437
127.180444	265.484908	35.717889	266.774437
127.180667	267.156943	35.717889	266.774437
127.180778	268.102479	35.717889	266.774437
127.180889	269.574072	35.717889	266.774437
127.181	270.562482	35.717889	266.774437
127.179889	259.886517	35.718	267.276637
127.18	260.409954	35.718	267.276637
127.180111	261.710752	35.718	267.276637
127.180222	263.066278	35.718	267.276637
127.180444	265.484908	35.718	267.276637
127.180667	267.156943	35.718	267.276637
127.180778	268.102479	35.718	267.276637
127.180889	269.574072	35.718	267.276637
127.181	270.562482	35.718	267.276637
127.18	260.409954	35.718	267.276637
127.180111	261.710752	35.718	267.276637
127.180222	263.066278	35.718	267.276637
127.180333	264.047548	35.718	267.276637
127.180556	266.699822	35.718	267.276637
127.180778	268.102479	35.718	267.276637
127.180889	269.574072	35.718	267.276637
127.181	270.562482	35.718	267.276637
127.181111	272.134216	35.718	267.276637
127.18	260.409954	35.718111	267.378128
127.180111	261.710752	35.718111	267.378128
127.180222	263.066278	35.718111	267.378128
127.180333	264.047548	35.718111	267.378128
127.180556	266.699822	35.718111	267.378128
127.180778	268.102479	35.718111	267.378128
127.180889	269.574072	35.718111	267.378128
127.181	270.562482	35.718111	267.378128
127.181111	272.134216	35.718111	267.378128
127.18	260.409954	35.718222	267.15633
127.180111	261.710752	35.718222	267.15633
127.180222	263.066278	35.718222	267.15633
127.180333	264.047548	35.718222	267.15633
127.180556	266.699822	35.718222	267.15633
127.180778	268.102479	35.718222	267.15633
127.180889	269.574072	35.718222	267.15633
127.181	270.562482	35.718222	267.15633
127.181111	272.134216	35.718222	267.15633
127.180111	261.710752	35.718222	267.15633
127.180222	263.066278	35.718222	267.15633
127.180333	264.047548	35.718222	267.15633
127.180444	265.484908	35.718222	267.15633
127.180667	267.156943	35.718222	267.15633
127.180889	269.574072	35.718222	267.15633
127.181	270.562482	35.718222	267.15633
127.181111	272.134216	35.718222	267.15633
127.181222	273.584484	35.718222	267.15633
127.180111	261.710752	35.718333	267.224181
127.180222	263.066278	35.718333	267.224181
127.180333	264.047548	35.718333	267.224181
127.180444	265.484908	35.718333	267.224181
127.180667	267.156943	35.718333	267.224181
127.180889	269.574072	35.718333	267.224181
127.181	270.562482	35.718333	267.224181
127.181111	272.134216	35.718333	267.224181
127.181222	273.584484	35.718333	267.224181
127.180111	261.710752	35.718444	267.995783
127.180222	263.066278	35.718444	267.995783
127.180333	264.047548	35.718444	267.995783
127.180444	265.484908	35.718444	267.995783
127.180667	267.156943	35.718444	267.995783
127.180889	269.574072	35.718444	267.995783
127.181	270.562482	35.718444	267.995783
127.181111	272.134216	35.718444	267.995783
127.181222	273.584484	35.718444	267.995783
127.180111	261.710752	35.718555	268.563358
127.180222	263.066278	35.718555	268.563358
127.180333	264.047548	35.718555	268.563358
127.180444	265.484908	35.718555	268.563358
127.180667	267.156943	35.718555	268.563358
127.180889	269.574072	35.718555	268.563358
127.181	270.562482	35.718555	268.563358
127.181111	272.134216	35.718555	268.563358
127.181222	273.584484	35.718555	268.563358
127.180222	263.066278	35.718555	268.563358
127.180333	264.047548	35.718555	268.563358
[truncated: 42,406 more rows]
