# Supplementary material for: Terrain Referenced Navigation Using a Multilayer Radial Basis Function-Based Extreme Learning Machine
Source: Hindawi journal article supplement (doi:10.1155/2019/9142694), 2019-07-11
Supplement: f1 [file 9142694.f1.zip › 9142694_Supplementary information files/CompareMatchingResults_180909/CIW_ELMTestResult.dat]

127.174444 35.700556 410.311067 
 127.174444 35.700667 412.878066 
 127.174444 35.700778 417.428662 
 127.174556 35.700778 412.189668 
 127.174556 35.700889 416.210427 
 127.174556 35.701000 421.944471 
 127.174556 35.701111 428.151785 
 127.174667 35.701111 420.405010 
 127.174667 35.701222 425.966733 
 127.174667 35.701333 430.610117 
 127.174667 35.701445 433.193485 
 127.174778 35.701445 420.542247 
 127.174778 35.701556 421.032866 
 127.174778 35.701667 419.050418 
 127.174778 35.701778 416.125780 
 127.174889 35.701889 410.572799 
 127.174889 35.702000 410.948204 
 127.174889 35.702111 411.152698 
 127.174889 35.702222 411.206182 
 127.175000 35.702222 407.616719 
 127.175000 35.702333 409.309194 
 127.175000 35.702445 410.487190 
 127.175000 35.702556 411.217865 
 127.175111 35.702556 409.102287 
 127.175111 35.702667 410.579484 
 127.175111 35.702778 411.398808 
 127.175111 35.702889 411.751618 
 127.175222 35.702889 409.409889 
 127.175222 35.703000 408.306059 
 127.175222 35.703111 406.127529 
 127.175222 35.703222 403.400359 
 127.175333 35.703222 397.050449 
 127.175333 35.703333 393.750499 
 127.175333 35.703445 391.638378 
 127.175333 35.703556 390.347847 
 127.175444 35.703556 389.300394 
 127.175444 35.703667 388.102060 
 127.175444 35.703778 386.702261 
 127.175444 35.703889 384.480559 
 127.175556 35.703889 379.541574 
 127.175556 35.704000 375.665673 
 127.175556 35.704111 371.956938 
 127.175556 35.704222 369.326589 
 127.175667 35.704222 367.559300 
 127.175667 35.704333 366.563806 
 127.175667 35.704444 366.101257 
 127.175667 35.704555 365.846337 
 127.175778 35.704555 362.956985 
 127.175778 35.704667 362.371060 
 127.175778 35.704778 361.258003 
 127.175778 35.704889 359.577868 
 127.175889 35.704889 356.728313 
 127.175889 35.705000 356.425217 
 127.175889 35.705111 356.116804 
 127.175889 35.705222 355.777972 
 127.176000 35.705222 355.233741 
 127.176000 35.705333 354.793674 
 127.176000 35.705444 353.677531 
 127.176000 35.705555 351.472136 
 127.176111 35.705555 347.668568 
 127.176111 35.705667 345.066953 
 127.176111 35.705778 343.396862 
 127.176111 35.705889 342.706082 
 127.176222 35.705889 339.275290 
 127.176222 35.706000 339.313227 
 127.176222 35.706111 339.247428 
 127.176222 35.706222 338.806223 
 127.176333 35.706222 332.061443 
 127.176333 35.706333 331.759838 
 127.176333 35.706444 331.291974 
 127.176333 35.706555 331.072667 
 127.176444 35.706555 329.835626 
 127.176444 35.706667 330.208215 
 127.176444 35.706778 330.866799 
 127.176444 35.706889 332.254324 
 127.176556 35.706889 332.700184 
 127.176556 35.707000 336.210744 
 127.176556 35.707111 341.919314 
 127.176556 35.707222 348.386645 
 127.176667 35.707222 350.935165 
 127.176667 35.707333 354.301881 
 127.176667 35.707444 355.945007 
 127.176667 35.707556 356.839302 
 127.176778 35.707556 354.966316 
 127.176778 35.707667 355.767546 
 127.176778 35.707778 355.859677 
 127.176778 35.707889 355.420613 
 127.176889 35.707889 352.397765 
 127.176889 35.708000 350.688538 
 127.176889 35.708111 349.316272 
 127.176889 35.708222 348.648832 
 127.177000 35.708222 348.299208 
 127.177000 35.708333 348.006916 
 127.177000 35.708444 348.015157 
 127.177111 35.708444 348.167403 
 127.177111 35.708556 347.418458 
 127.177111 35.708667 347.022707 
 127.177111 35.708778 347.298455 
 127.177222 35.708778 338.904292 
 127.177222 35.708889 340.489205 
 127.177222 35.709000 342.479704 
 127.177222 35.709111 344.221864 
 127.177333 35.709111 340.473705 
 127.177333 35.709222 342.040283 
 127.177333 35.709333 343.114710 
 127.177333 35.709444 344.150635 
 127.177444 35.709444 341.378171 
 127.177444 35.709556 341.514636 
 127.177444 35.709667 341.500854 
 127.177444 35.709778 341.493061 
 127.177556 35.709778 335.128686 
 127.177556 35.709889 335.092896 
 127.177556 35.710000 334.954785 
 127.177556 35.710111 334.570660 
 127.177667 35.710111 333.196708 
 127.177667 35.710222 332.259888 
 127.177667 35.710333 330.834278 
 127.177667 35.710444 329.619924 
 127.177778 35.710444 327.679546 
 127.177778 35.710556 326.478964 
 127.177778 35.710667 325.260953 
 127.177778 35.710778 323.769005 
 127.177889 35.710778 311.016489 
 127.177889 35.710889 308.611833 
 127.177889 35.711000 307.636703 
 127.178000 35.711111 302.350044 
 127.178000 35.711222 302.655679 
 127.178000 35.711333 304.087951 
 127.178111 35.711333 302.625136 
 127.178111 35.711444 305.542234 
 127.178111 35.711556 310.971181 
 127.178111 35.711667 316.254236 
 127.178222 35.711667 314.882328 
 127.178222 35.711778 318.740923 
 127.178222 35.711889 320.213789 
 127.178222 35.712000 320.271152 
 127.178333 35.712000 316.822108 
 127.178333 35.712111 315.761321 
 127.178333 35.712222 311.838608 
 127.178333 35.712333 304.692731 
 127.178444 35.712333 290.401048 
 127.178444 35.712444 285.971797 
 127.178444 35.712556 283.200058 
 127.178444 35.712667 281.096503 
 127.178556 35.712667 280.537040 
 127.178556 35.712778 278.637642 
 127.178556 35.712889 274.248686 
 127.178667 35.712889 268.162899 
 127.178667 35.713000 262.388361 
 127.178667 35.713111 257.492037 
 127.178667 35.713222 254.892080 
 127.178778 35.713222 254.212673 
 127.178778 35.713333 253.708093 
 127.178778 35.713444 253.489813 
 127.178778 35.713556 253.353870 
 127.178889 35.713556 253.621013 
 127.178889 35.713667 253.561689 
 127.178889 35.713778 253.507338 
 127.178889 35.713889 253.416633 
 127.179000 35.713889 253.556660 
 127.179000 35.714000 253.389051 
 127.179000 35.714111 253.035163 
 127.179111 35.714111 253.118386 
 127.179111 35.714222 252.603421 
 127.179111 35.714333 252.168644 
 127.179111 35.714445 251.917056 
 127.179222 35.714445 252.198132 
 127.179222 35.714556 251.941590 
 127.179222 35.714667 251.752160 
 127.179222 35.714778 251.495954 
 127.179333 35.714778 251.657018 
 127.179333 35.714889 251.247023 
 127.179333 35.715000 250.661990 
 127.179444 35.715000 250.015122 
 127.179444 35.715111 249.354155 
 127.179444 35.715222 249.056455 
 127.179444 35.715333 249.071343 
 127.179556 35.715333 248.910846 
 127.179556 35.715445 249.040995 
 127.179556 35.715556 249.346902 
 127.179556 35.715667 249.970336 
 127.179667 35.715667 250.646820 
 127.179667 35.715778 251.437952 
 127.179667 35.715889 252.748493 
 127.179778 35.715889 251.985026 
 127.179778 35.716000 253.012982 
 127.179778 35.716111 254.485605 
 127.179778 35.716222 255.770639 
 127.179889 35.716222 255.516599 
 127.179889 35.716333 257.085751 
 127.179889 35.716444 257.924204 
 127.179889 35.716556 258.413026 
 127.180000 35.716556 258.114291 
 127.180000 35.716667 258.647974 
 127.180000 35.716778 259.147415 
 127.180111 35.716778 259.907638 
 127.180111 35.716889 260.817907 
 127.180111 35.717000 261.620476 
 127.180111 35.717111 262.663666 
 127.180222 35.717111 262.018881 
 127.180222 35.717222 262.613560 
 127.180222 35.717333 263.519127 
 127.180222 35.717444 264.711718 
 127.180333 35.717444 263.427060 
 127.180333 35.717555 263.928249 
 127.180333 35.717667 264.502890 
 127.180444 35.717667 263.732597 
 127.180444 35.717778 264.053261 
 127.180444 35.717889 264.638581 
 127.180444 35.718000 265.770757 
 127.180556 35.718000 264.964449 
 127.180556 35.718111 265.692158 
 127.180556 35.718222 266.464076 
 127.180667 35.718222 265.532248 
 127.180667 35.718333 265.860004 
 127.180667 35.718444 266.520125 
 127.180667 35.718555 267.927171 
 127.180778 35.718555 266.278713 
 127.180778 35.718667 267.652842 
 127.180778 35.718778 269.179494 
 127.180889 35.718778 266.947506 
 127.180889 35.718889 267.295260 
 127.180889 35.719000 267.622662 
 127.180889 35.719111 268.242884 
 127.181000 35.719111 267.078813 
 127.181000 35.719222 267.426166 
 127.181000 35.719333 268.500664 
 127.181111 35.719444 269.906409 
 127.181111 35.719556 272.181249 
 127.181111 35.719667 273.404641 
 127.181222 35.719667 272.853348 
 127.181222 35.719778 273.335438 
 127.181222 35.719889 273.510467 
 127.181333 35.720000 273.330747 
 127.181333 35.720111 273.608063 
 127.181333 35.720222 274.013139 
 127.181444 35.720222 273.940010 
 127.181444 35.720333 274.258732 
 127.181444 35.720444 274.631686 
 127.181444 35.720556 275.376012 
 127.181556 35.720556 274.502001 
 127.181556 35.720667 274.984513 
 127.181556 35.720778 276.157313 
 127.181667 35.720778 276.177333 
 127.181667 35.720889 277.487545 
 127.181667 35.721000 278.572644 
 127.181778 35.721000 278.640188 
 127.181778 35.721111 278.913501 
 127.181778 35.721222 279.093644 
 127.181778 35.721333 279.400541 
 127.181889 35.721333 279.567846 
 127.181889 35.721444 280.263065 
 127.181889 35.721556 281.539686 
 127.182000 35.721556 283.017726 
 127.182000 35.721667 283.591004 
 127.182000 35.721778 283.949375 
 127.182000 35.721889 284.351875 
 127.182111 35.721889 284.401741 
 127.182111 35.722000 284.627158 
 127.182111 35.722111 285.456383 
 127.182222 35.722111 285.894033 
 127.182222 35.722222 286.991208 
 127.182222 35.722333 289.414097 
 127.182222 35.722444 293.303946 
 127.182333 35.722444 293.625340 
 127.182333 35.722556 297.717874 
 127.182333 35.722667 300.816532 
 127.182444 35.722667 299.298235 
 127.182444 35.722778 301.881685 
 127.182444 35.722889 303.326335 
 127.182444 35.723000 304.217418 
 127.182556 35.723000 305.804041 
 127.182556 35.723111 306.571066 
 127.182556 35.723222 307.107815 
 127.182667 35.723222 307.483007 
 127.182667 35.723333 308.213318 
 127.182667 35.723444 310.191830 
 127.182778 35.723444 313.319586 
 127.182778 35.723556 318.004179 
 127.182778 35.723667 321.167667 
 127.182778 35.723778 322.311336 
 127.182889 35.723778 324.675821 
 127.182889 35.723889 324.553394 
 127.182889 35.724000 324.860580 
 127.183000 35.724000 330.671072 
 127.183000 35.724111 331.025905 
 127.183000 35.724222 331.274323 
 127.183111 35.724333 332.494510 
 127.183111 35.724444 332.512062 
 127.183111 35.724556 332.892314 
 127.183222 35.724556 334.364063 
 127.183222 35.724667 335.575163 
 127.183222 35.724778 336.801212 
 127.183333 35.724778 338.557970 
 127.183333 35.724889 338.572573 
 127.183333 35.725000 338.925958 
 127.183333 35.725111 339.974307 
 127.183444 35.725111 342.966080 
 127.183444 35.725222 344.376236 
 127.183444 35.725333 347.004613 
 127.183556 35.725333 354.571530 
 127.183556 35.725444 356.631748 
 127.183556 35.725556 360.578040 
 127.183667 35.725556 365.586346 
 127.183667 35.725667 371.394108 
 127.183667 35.725778 375.804945 
 127.183667 35.725889 377.611514 
 127.183778 35.725889 380.167968 
 127.183778 35.726000 380.502282 
 127.183778 35.726111 380.751149 
 127.183889 35.726111 385.702850 
 127.183889 35.726222 385.965793 
 127.183889 35.726333 387.177039 
 127.184000 35.726333 399.527618 
 127.184000 35.726445 399.663528 
 127.184000 35.726556 400.171937 
 127.184000 35.726667 400.926318 
 127.184111 35.726667 410.280863 
 127.184111 35.726778 411.113477 
 127.184111 35.726889 412.675029 
 127.184222 35.726889 416.248586 
 127.184222 35.727000 418.093224 
 127.184222 35.727111 420.436972 
 127.184333 35.727111 421.706154 
 127.184333 35.727222 424.466352 
 127.184333 35.727333 427.044779 
 127.184444 35.727333 434.935665 
 127.184444 35.727445 437.477194 
 127.184444 35.727556 440.309767 
 127.184444 35.727667 443.677766 
 127.184556 35.727667 445.026714 
 127.184556 35.727778 447.419123 
 127.184556 35.727889 449.434390 
 127.184667 35.727889 448.566644 
 127.184667 35.728000 449.611177 
 127.184667 35.728111 451.101638 
 127.184778 35.728111 451.113399 
 127.184778 35.728222 451.935636 
 127.184778 35.728333 455.175594 
 127.184778 35.728445 462.238468 
 127.184889 35.728445 458.820627 
 127.184889 35.728556 467.862179 
 127.184889 35.728667 482.472682 
 127.185000 35.728667 488.984143 
 127.185000 35.728778 501.468008 
 127.185000 35.728889 512.558721 
 127.185111 35.728889 505.776761 
 127.185111 35.729000 513.722229 
 127.185111 35.729111 521.391275 
 127.185222 35.729111 516.753899 
 127.185222 35.729222 524.732725 
 127.185222 35.729333 530.798547 
 127.185222 35.729444 534.363686 
 127.185333 35.729444 531.525775 
 127.185333 35.729555 535.056833 
 127.185333 35.729667 536.870512 
 127.185444 35.729667 543.751521 
 127.185444 35.729778 545.110759 
 127.185444 35.729889 542.903398 
 127.185556 35.729889 555.326496 
 127.185556 35.730000 552.383515 
 127.185556 35.730111 546.409930 
 127.185667 35.730111 554.683057 
 127.185667 35.730222 547.849776 
 127.185667 35.730333 537.240243 
 127.185667 35.730444 526.821027 
 127.185778 35.730444 535.957861 
 127.185778 35.730555 524.361454 
 127.185778 35.730667 513.027638 
 127.185889 35.730667 520.915278 
 127.185889 35.730778 503.908783 
 127.185889 35.730889 491.778603 
 127.186000 35.730889 497.180282 
 127.186000 35.731000 486.655451 
 127.186000 35.731111 480.821157 
 127.186111 35.731111 480.038159 
 127.186111 35.731222 474.417824 
 127.186111 35.731333 469.898882 
 127.186222 35.731333 469.111071 
 127.186222 35.731444 465.690939 
 127.186222 35.731555 461.350958 
 127.186222 35.731667 456.507155 
 127.186333 35.731667 455.085811 
 127.186333 35.731778 452.125528 
 127.186333 35.731889 450.266477 
 127.186444 35.731889 450.990991 
 127.186444 35.732000 449.944801 
 127.186444 35.732111 448.922473 
 127.186556 35.732111 452.280918 
 127.186556 35.732222 450.160240 
 127.186556 35.732333 449.111791 
 127.186667 35.732333 455.010628 
 127.186667 35.732444 453.347554 
 127.186667 35.732556 452.799538 
 127.186778 35.732556 456.117816 
 127.186778 35.732667 455.708345 
 127.186778 35.732778 454.688317 
 127.186889 35.732889 460.457952 
 127.186889 35.733000 459.561758 
 127.186889 35.733111 459.342358 
 127.187000 35.733111 460.153969 
 127.187000 35.733222 459.997398 
 127.187000 35.733333 460.197529 
 127.187111 35.733333 461.489509 
 127.187111 35.733444 462.679125 
 127.187111 35.733556 466.661029 
 127.187222 35.733556 478.065242 
 127.187222 35.733667 483.161759 
 127.187222 35.733778 486.082802 
 127.187333 35.733778 486.596188 
 127.187333 35.733889 487.039644 
 127.187333 35.734000 487.728452 
 127.187444 35.734000 491.124446 
 127.187444 35.734111 493.998998 
 127.187444 35.734222 499.304943 
 127.187556 35.734222 507.931273 
 127.187556 35.734333 510.104248 
 127.187556 35.734444 511.312600 
 127.187556 35.734556 511.674306 
 127.187667 35.734556 509.211730 
 127.187667 35.734667 506.442270 
 127.187667 35.734778 499.251993 
 127.187778 35.734778 487.647550 
 127.187778 35.734889 479.636125 
 127.187778 35.735000 469.516141 
 127.187889 35.735000 474.440562 
 127.187889 35.735111 467.546117 
 127.187889 35.735222 454.380569 
 127.188000 35.735222 446.490628 
 127.188000 35.735333 426.080644 
 127.188000 35.735444 416.802954 
 127.188111 35.735444 412.357196 
 127.188111 35.735556 410.696861 
 127.188111 35.735667 410.919541 
 127.188222 35.735667 406.422382 
 127.188222 35.735778 407.889016 
 127.188222 35.735889 411.258239 
 127.188333 35.735889 408.329482 
 127.188333 35.736000 415.755133 
 127.188333 35.736111 420.963759 
 127.188333 35.736222 423.491468 
 127.188444 35.736222 420.383214 
 127.188444 35.736333 421.514260 
 127.188444 35.736444 422.797666 
 127.188556 35.736444 420.352186 
 127.188556 35.736556 422.704143 
 127.188556 35.736667 427.508894 
 127.188667 35.736667 421.517680 
 127.188667 35.736778 431.999561 
 127.188667 35.736889 441.289560 
 127.188778 35.736889 431.365460 
 127.188778 35.737000 440.781928 
 127.188778 35.737111 447.051647 
 127.188889 35.737111 440.697953 
 127.188889 35.737222 444.337483 
 127.188889 35.737333 447.629304 
 127.189000 35.737333 440.803401 
 127.189000 35.737444 444.212148 
 127.189000 35.737556 448.072618 
 127.189111 35.737556 451.130216 
 127.189111 35.737667 454.835661 
 127.189111 35.737778 455.581846 
 127.189222 35.737778 456.155796 
 127.189222 35.737889 454.208285 
 127.189222 35.738000 447.715822 
 127.189333 35.738111 421.980067 
 127.189333 35.738222 415.513496 
 127.189333 35.738333 415.306046 
 127.189444 35.738333 411.033114 
 127.189444 35.738444 413.212301 
 127.189444 35.738556 417.139967 
 127.189556 35.738556 421.940244 
 127.189556 35.738667 430.314920 
 127.189556 35.738778 439.426541 
 127.189667 35.738778 440.396798 
 127.189667 35.738889 442.442459 
 127.189667 35.739000 444.233014 
 127.189778 35.739000 440.655203 
 127.189778 35.739111 440.555625 
 127.189778 35.739222 440.529068 
 127.189889 35.739222 437.073534 
 127.189889 35.739333 437.875413 
 127.189889 35.739445 438.867034 
 127.190000 35.739445 433.744620 
 127.190000 35.739556 435.248384 
 127.190000 35.739667 439.342433 
 127.190111 35.739667 432.848520 
 127.190111 35.739778 442.046394 
 127.190111 35.739889 457.499917 
 127.190222 35.739889 455.341227 
 127.190222 35.740000 465.264195 
 127.190222 35.740111 468.978940 
 127.190333 35.740111 464.482303 
 127.190333 35.740222 467.790375 
 127.190333 35.740333 470.452975 
 127.190444 35.740333 461.932084 
 127.190444 35.740445 466.446112 
 127.190444 35.740556 475.646012 
 127.190556 35.740556 448.524887 
 127.190556 35.740667 461.249493 
 127.190556 35.740778 481.449395 
 127.190556 35.740889 499.389594 
 127.190667 35.740889 467.791065 
 127.190667 35.741000 483.659709 
 127.190667 35.741111 497.506021 
 127.190778 35.741111 474.159500 
 127.190778 35.741222 487.307176 
 127.190778 35.741333 502.033179 
 127.190889 35.741333 482.796213 
 127.190889 35.741445 498.687787 
 127.190889 35.741556 511.435728 
 127.191000 35.741556 484.716856 
 127.191000 35.741667 499.129053 
 127.191000 35.741778 510.118181 
 127.191111 35.741778 497.635692 
 127.191111 35.741889 509.188400 
 127.191111 35.742000 513.945166 
 127.191222 35.742000 509.224034 
 127.191222 35.742111 512.904535 
 127.191222 35.742222 514.030624 
 127.191333 35.742222 505.362015 
 127.191333 35.742333 508.205630 
 127.191333 35.742444 506.077607 
 127.191444 35.742444 499.314123 
 127.191444 35.742555 497.721566 
 127.191444 35.742667 491.328169 
 127.191556 35.742667 496.353893 
 127.191556 35.742778 493.095499 
 127.191556 35.742889 490.425143 
 127.191667 35.742889 493.580241 
 127.191667 35.743000 492.336338 
 127.191667 35.743111 490.536567 
 127.191778 35.743111 489.245475 
 127.191778 35.743222 483.115527 
 127.191778 35.743333 474.062909 
 127.191889 35.743333 468.898211 
 127.191889 35.743444 463.386067 
 127.191889 35.743555 460.081430 
 127.192000 35.743555 464.234047 
 127.192000 35.743667 457.574553 
 127.192000 35.743778 449.530942 
 127.192111 35.743778 446.049981 
 127.192111 35.743889 438.689170 
 127.192111 35.744000 434.958432 
 127.192222 35.744000 438.417120 
 127.192222 35.744111 436.191750 
 127.192222 35.744222 434.806243 
 127.192333 35.744222 438.481731 
 127.192333 35.744333 437.042027 
 127.192333 35.744444 436.028341 
 127.192444 35.744444 441.167108 
 127.192444 35.744556 438.639356 
 127.192444 35.744667 437.455580 
 127.192556 35.744778 441.335463 
 127.192556 35.744889 440.732956 
 127.192556 35.745000 441.708728 
 127.192667 35.745000 453.907799 
 127.192667 35.745111 455.831692 
 127.192667 35.745222 457.740128 
 127.192778 35.745222 462.716573 
 127.192778 35.745333 463.130345 
 127.192778 35.745444 464.136380 
 127.192889 35.745444 467.064093 
 127.192889 35.745556 471.726553 
 127.192889 35.745667 478.739797 
 127.193000 35.745667 475.958269 
 127.193000 35.745778 483.353452 
 127.193000 35.745889 489.173236 
 127.193111 35.745889 473.346765 
 127.193111 35.746000 478.597622 
 127.193111 35.746111 484.007387 
 127.193222 35.746111 459.105056 
 127.193222 35.746222 466.620779 
 127.193222 35.746333 476.676365 
 127.193333 35.746333 454.454835 
 127.193333 35.746444 461.981235 
 127.193333 35.746556 470.663645 
 127.193444 35.746556 443.912750 
 127.193444 35.746667 446.697815 
 127.193444 35.746778 452.674666 
 127.193556 35.746778 438.708633 
 127.193556 35.746889 441.281965 
 127.193556 35.747000 447.308532 
 127.193667 35.747000 441.585216 
 127.193667 35.747111 446.001563 
 127.193667 35.747222 452.897972 
 127.193778 35.747222 445.994063 
 127.193778 35.747333 448.543606 
 127.193778 35.747444 453.932289 
 127.193889 35.747444 450.794031 
 127.193889 35.747556 457.696246 
 127.193889 35.747667 463.478714 
 127.194000 35.747667 460.418667 
 127.194000 35.747778 462.953867 
 127.194000 35.747889 464.785194 
 127.194111 35.747889 461.400037 
 127.194111 35.748000 465.897585 
 127.194111 35.748111 471.417044 
 127.194222 35.748111 478.009321 
 127.194222 35.748222 484.153824 
 127.194222 35.748333 485.164502 
 127.194333 35.748333 486.247940 
 127.194333 35.748444 485.588520 
 127.194333 35.748556 481.326126 
 127.194444 35.748556 477.614324 
 127.194444 35.748667 472.560867 
 127.194444 35.748778 467.756546 
 127.194556 35.748778 467.360522 
 127.194556 35.748889 466.499541 
 127.194556 35.749000 465.011596 
 127.194667 35.749000 465.920971 
 127.194667 35.749111 462.608964 
 127.194667 35.749222 453.982130 
 127.194778 35.749333 410.531759 
 127.194778 35.749444 393.355629 
 127.194778 35.749556 384.920780 
 127.194889 35.749556 389.853484 
 127.194889 35.749667 387.234971 
 127.194889 35.749778 384.763703 
 127.195000 35.749778 390.304115 
 127.195000 35.749889 387.029962 
 127.195000 35.750000 380.620476 
 127.195111 35.750000 390.316672 
 127.195111 35.750111 379.616996 
 127.195111 35.750222 368.652096 
 127.195222 35.750222 386.626705 
 127.195222 35.750333 381.419502 
 127.195222 35.750444 378.984619 
 127.195333 35.750444 385.080812 
 127.195333 35.750556 383.074253 
 127.195333 35.750667 380.075492 
 127.195444 35.750667 384.541034 
 127.195444 35.750778 380.283700 
 127.195444 35.750889 375.436866 
 127.195556 35.750889 380.622010 
 127.195556 35.751000 376.446704 
 127.195556 35.751111 373.370518 
 127.195667 35.751111 376.307855 
 127.195667 35.751222 372.102397 
 127.195667 35.751333 366.208477 
 127.195778 35.751333 369.111073 
 127.195778 35.751444 363.392380 
 127.195778 35.751556 348.832762 
 127.195889 35.751556 347.004188 
 127.195889 35.751667 327.007389 
 127.195889 35.751778 316.522845 
 127.196000 35.751778 317.856159 
 127.196000 35.751889 314.061842 
 127.196000 35.752000 311.871913 
 127.196111 35.752000 315.449881 
 127.196111 35.752111 313.905013 
 127.196111 35.752222 312.713194 
 127.196222 35.752222 315.040563 
 127.196222 35.752333 314.945764 
 127.196222 35.752445 315.586383 
 127.196333 35.752445 316.744012 
 127.196333 35.752556 317.917347 
 127.196333 35.752667 318.247864 
 127.196444 35.752667 314.691127 
 127.196444 35.752778 313.001196 
 127.196444 35.752889 309.222828 
 127.196556 35.752889 296.432952 
 127.196556 35.753000 294.579312 
 127.196556 35.753111 293.293975 
 127.196667 35.753111 290.581612 
 127.196667 35.753222 290.220008 
 127.196667 35.753333 289.146719 
 127.196667 35.753445 286.981811 
 127.196778 35.753445 269.563049 
 127.196778 35.753556 265.900295 
 127.196778 35.753667 263.709767 
 127.196889 35.753667 258.894305 
 127.196889 35.753778 258.900053 
 127.196889 35.753889 259.113250 
 127.197000 35.753889 253.923961 
 127.197000 35.754000 249.804833 
 127.197000 35.754111 244.187878 
 127.197111 35.754111 234.484649 
 127.197111 35.754222 233.051765 
 127.197111 35.754333 233.000999 
 127.197222 35.754333 230.864741 
 127.197222 35.754444 230.535503 
 127.197222 35.754555 229.591642 
 127.197333 35.754555 225.855909 
 127.197333 35.754667 223.438104 
 127.197333 35.754778 219.388985 
 127.197444 35.754778 215.445496 
 127.197444 35.754889 212.729136 
 127.197444 35.755000 208.237095 
 127.197556 35.755000 207.832585 
 127.197556 35.755111 202.179927 
 127.197556 35.755222 196.145903 
 127.197667 35.755222 200.748072 
 127.197667 35.755333 198.923362 
 127.197667 35.755444 197.854164 
 127.197778 35.755444 200.349407 
 127.197778 35.755555 200.497087 
 127.197778 35.755667 200.676951 
 127.197889 35.755667 203.488485 
 127.197889 35.755778 203.593151 
 127.197889 35.755889 203.574615 
 127.198000 35.755889 209.981034 
 127.198000 35.756000 209.604286 
 127.198000 35.756111 208.800742 
 127.198111 35.756111 212.736115 
 127.198111 35.756222 212.321364 
 127.198111 35.756333 211.669420 
 127.198222 35.756333 219.007280 
 127.198222 35.756444 217.698668 
 127.198222 35.756555 216.850487 
 127.198333 35.756555 223.534918 
 127.198333 35.756667 221.565360 
 127.198333 35.756778 220.433527 
 127.198444 35.756778 234.157132 
 127.198444 35.756889 233.305484 
 127.198444 35.757000 232.280799 
 127.198556 35.757000 236.936859 
 127.198556 35.757111 236.618234 
 127.198556 35.757222 235.663471 
 127.198667 35.757333 238.461992 
 127.198667 35.757444 236.181122 
 127.198667 35.757556 234.938722 
 127.198778 35.757556 234.988837 
 127.198778 35.757667 229.201095 
 127.198778 35.757778 221.853678 
 127.198889 35.757778 215.864951 
 127.198889 35.757889 204.618056 
 127.198889 35.758000 197.632918 
 127.199000 35.758000 207.865102 
 127.199000 35.758111 197.195847 
 127.199000 35.758222 188.221233 
 127.199111 35.758222 189.359072 
 127.199111 35.758333 178.829698 
 127.199111 35.758444 174.042606 
 127.199222 35.758444 180.700538 
 127.199222 35.758556 174.139413 
 127.199222 35.758667 169.927065 
 127.199333 35.758667 171.360240 
 127.199333 35.758778 165.013739 
 127.199333 35.758889 161.934454 
 127.199444 35.758889 166.014666 
 127.199444 35.759000 160.200983 
 127.199444 35.759111 155.598246 
 127.199556 35.759111 155.106118 
 127.199556 35.759222 147.548964 
 127.199556 35.759333 143.344495 
 127.199667 35.759333 149.852017 
 127.199667 35.759444 144.085387 
 127.199667 35.759556 140.734143 
 127.199778 35.759556 148.712706 
 127.199778 35.759667 141.621371 
 127.199778 35.759778 134.389572 
 127.199889 35.759778 146.112638 
 127.199889 35.759889 132.977121 
 127.199889 35.760000 125.303215 
 127.200000 35.760000 139.047151 
 127.200000 35.760111 128.507796 
 127.200000 35.760222 122.238232 
 127.200111 35.760222 134.477769 
 127.200111 35.760333 125.757712 
 127.200111 35.760444 119.844503 
 127.200222 35.760556 117.071443 
 127.200222 35.760667 112.993083 
 127.200222 35.760778 111.856279 
 127.200333 35.760778 111.682575 
 127.200333 35.760889 111.015231 
 127.200333 35.761000 110.946340 
 127.200444 35.761000 112.781398 
 127.200444 35.761111 112.389597 
 127.200444 35.761222 112.041749 
 127.200556 35.761222 115.817509 
 127.200556 35.761333 111.273798 
 127.200556 35.761444 107.927733 
 127.200667 35.761444 108.500173 
 127.200667 35.761556 105.693217 
 127.200667 35.761667 104.716190 
 127.200778 35.761667 105.753702 
 127.200778 35.761778 105.061084 
 127.200778 35.761889 105.525449 
 127.200889 35.761889 105.107955 
 127.200889 35.762000 104.469062 
 127.200889 35.762111 104.565712 
 127.201000 35.762111 103.494263 
 127.201000 35.762222 103.440797 
 127.201000 35.762333 103.737795 
 127.201111 35.762333 103.530676 
 127.201111 35.762444 103.670153 
 127.201111 35.762556 104.031091 
 127.201222 35.762556 103.671944 
 127.201222 35.762667 103.539119 
 127.201222 35.762778 103.490234 
 127.201333 35.762778 103.045794 
 127.201333 35.762889 102.626250 
 127.201333 35.763000 102.052145 
 127.201444 35.763000 100.375729 
 127.201444 35.763111 100.062967 
 127.201444 35.763222 99.865886 
 127.201444 35.763333 99.636372 
 127.201556 35.763333 99.435695 
 127.201556 35.763444 99.020022 
 127.201556 35.763556 98.638094 
 127.201667 35.763556 98.465626 
 127.201667 35.763667 97.731273 
 127.201667 35.763778 96.788204 
 127.201778 35.763778 96.329816 
 127.201778 35.763889 95.358854 
 127.201778 35.764000 94.905603 
 127.201889 35.764000 95.549393 
 127.201889 35.764111 95.174387 
 127.201889 35.764222 95.106352 
 127.202000 35.764222 95.107750 
 127.202000 35.764333 95.113434 
 127.202000 35.764445 95.058833 
 127.202111 35.764445 95.063869 
 127.202111 35.764556 94.689736 
 127.202111 35.764667 94.014195 
 127.202222 35.764667 94.441391 
 127.202222 35.764778 94.079578 
 127.202222 35.764889 93.804915 
 127.202333 35.764889 94.172651 
 127.202333 35.765000 93.938357 
 127.202333 35.765111 93.261832 
 127.202444 35.765111 92.799981 
 127.202444 35.765222 90.766600 
 127.202444 35.765333 89.081872 
 127.202556 35.765445 88.665759 
 127.202556 35.765556 88.665294 
 127.202556 35.765667 88.966238 
 127.202667 35.765667 90.776451 
 127.202667 35.765778 91.201555 
 127.202667 35.765889 91.959019 
 127.202778 35.765889 91.795093 
 127.202778 35.766000 92.838850 
 127.202778 35.766111 95.250871 
 127.202889 35.766111 97.281631 
 127.202889 35.766222 99.807647 
 127.202889 35.766333 100.748444 
 127.203000 35.766333 105.109456 
 127.203000 35.766445 105.256004 
 127.203000 35.766556 105.141933 
 127.203111 35.766556 106.674989 
 127.203111 35.766667 105.652917 
 127.203111 35.766778 102.438828 
 127.203222 35.766778 101.537384 
 127.203222 35.766889 95.089356 
 127.203222 35.767000 91.437014 
 127.203333 35.767000 90.575880 
 127.203333 35.767111 89.784898 
 127.203333 35.767222 89.498551 
 127.203444 35.767222 90.005206 
 127.203444 35.767333 89.045898 
 127.203444 35.767444 87.508003 
 127.203444 35.767555 85.497734 
 127.203556 35.767555 83.729535 
 127.203556 35.767667 83.244289 
 127.203556 35.767778 83.017637 
 127.203667 35.767778 82.999900 
 127.203667 35.767889 82.864776 
 127.203667 35.768000 82.436234 
 127.203778 35.768000 83.908011 
 127.203778 35.768111 83.775627 
 127.203778 35.768222 83.234017 
 127.203889 35.768222 83.104404 
 127.203889 35.768333 81.832528 
 127.203889 35.768444 80.492459 
 127.204000 35.768444 80.027431 
 127.204000 35.768555 79.817661 
 127.204000 35.768667 79.790786 
 127.204111 35.768667 79.997776 
 127.204111 35.768778 79.917178 
 127.204111 35.768889 79.892571 
 127.204222 35.768889 79.984531 
 127.204222 35.769000 79.919775 
 127.204222 35.769111 79.925782 
 127.204333 35.769111 79.907355 
 127.204333 35.769222 79.961426 
 127.204333 35.769333 80.056100 
 127.204333 35.769444 80.118953 
 127.204444 35.769444 79.979593 
 127.204444 35.769555 80.076442 
 127.204444 35.769667 80.100653 
 127.204556 35.769667 80.073519 
 127.204556 35.769778 80.085429 
 127.204556 35.769889 80.062169 
 127.204667 35.769889 80.070651 
 127.204667 35.770000 80.004213 
 127.204667 35.770111 79.854851 
 127.204778 35.770111 80.062782 
 127.204778 35.770222 79.901102 
 127.204778 35.770333 79.664818 
 127.204889 35.770333 80.123739 
 127.204889 35.770444 80.013916 
 127.204889 35.770556 79.904409 
 127.205000 35.770556 80.100078 
 127.205000 35.770667 80.054234 
 127.205000 35.770778 80.031079 
 127.205111 35.770778 80.083702 
 127.205111 35.770889 80.074377 
 127.205111 35.771000 80.070285 
 127.205111 35.771111 80.064678 
 127.205222 35.771111 80.035491 
 127.205222 35.771222 79.999852 
 127.205222 35.771333 79.926095 
 127.205333 35.771333 79.954240 
 127.205333 35.771444 79.901222 
 127.205333 35.771556 79.865193 
 127.205444 35.771556 80.376638 
 127.205444 35.771667 80.344281 
 127.205444 35.771778 80.359847 
 127.205556 35.771778 80.587890 
 127.205556 35.771889 80.588674 
 127.205556 35.772000 80.600269 
 127.205667 35.772000 80.923908 
 127.205667 35.772111 80.966681 
 127.205667 35.772222 80.992289 
 127.205778 35.772222 81.062442 
 127.205778 35.772333 81.050654 
 127.205778 35.772444 81.012965 
 127.205889 35.772444 80.907981 
 127.205889 35.772556 80.835971 
 127.205889 35.772667 80.806635 
 127.205889 35.772778 80.811368 
 127.206000 35.772778 80.867489 
 127.206000 35.772889 80.963420 
 127.206000 35.773000 81.282511 
 127.206111 35.773000 81.919199 
 127.206111 35.773111 82.128948 
 127.206111 35.773222 82.217666 
 127.206222 35.773222 82.228847 
 127.206222 35.773333 82.292162 
 127.206222 35.773444 82.364994 
 127.206333 35.773444 82.461105 
 127.206333 35.773556 82.666986 
 127.206333 35.773667 82.964734 
 127.206444 35.773667 84.129945 
 127.206444 35.773778 84.411475 
 127.206444 35.773889 84.508621 
 127.206556 35.773889 84.698691 
 127.206556 35.774000 85.094126 
 127.206556 35.774111 85.983534 
 127.206667 35.774222 92.968685 
 127.206667 35.774333 99.234410 
 127.206667 35.774444 105.614180 
 127.206778 35.774444 114.173705 
 127.206778 35.774556 115.460263 
 127.206778 35.774667 116.443068 
 127.206889 35.774667 122.136974 
 127.206889 35.774778 122.517041 
 127.206889 35.774889 122.694773 
 127.207000 35.774889 127.003459 
 127.207000 35.775000 126.206352 
 127.207000 35.775111 126.512738 
 127.207111 35.775111 133.250122 
 127.207111 35.775222 136.746657 
 127.207111 35.775333 143.246186 
 127.207222 35.775333 150.769952 
 127.207222 35.775444 154.855054 
 127.207222 35.775556 157.035914 
 127.207333 35.775556 160.568393 
 127.207333 35.775667 162.160829 
 127.207333 35.775778 163.107543 
 127.207333 35.775889 164.237021 
 127.207444 35.775889 166.580077 
 127.207444 35.776000 168.400657 
 127.207444 35.776111 170.588201 
 127.207556 35.776111 183.806092 
 127.207556 35.776222 185.984637 
 127.207556 35.776333 182.636473 
 127.207667 35.776333 193.349270 
 127.207667 35.776444 186.702467 
 127.207667 35.776556 175.352685 
 127.207778 35.776556 179.832386 
 127.207778 35.776667 167.938914 
 127.207778 35.776778 159.171102 
 127.207889 35.776778 165.764391 
 127.207889 35.776889 158.361535 
 127.207889 35.777000 154.034144 
 127.208000 35.777000 162.054503 
 127.208000 35.777111 157.711757 
 127.208000 35.777222 154.638389 
 127.208000 35.777333 152.059373 
 127.208111 35.777333 163.747708 
 127.208111 35.777445 159.861872 
 127.208111 35.777556 156.904815 
 127.208222 35.777556 163.944339 
 127.208222 35.777667 160.952544 
 127.208222 35.777778 159.211096 
 127.208333 35.777778 167.253690 
 127.208333 35.777889 166.969994 
 127.208333 35.778000 168.628476 
 127.208444 35.778000 173.710694 
 127.208444 35.778111 178.723799 
 127.208444 35.778222 185.173768 
 127.208556 35.778222 191.359081 
 127.208556 35.778333 195.625510 
 127.208556 35.778445 197.787031 
 127.208667 35.778556 200.282731 
 127.208667 35.778667 201.092738 
 127.208667 35.778778 202.256486 
 127.208778 35.778778 203.428829 
 127.208778 35.778889 204.761198 
 127.208778 35.779000 207.854146 
 127.208889 35.779000 212.764070 
 127.208889 35.779111 216.289589 
 127.208889 35.779222 218.288715 
 127.209000 35.779222 219.255468 
 127.209000 35.779333 215.737266 
 127.209000 35.779444 212.086239 
 127.209111 35.779444 195.834204 
 127.209111 35.779555 189.003405 
 127.209111 35.779667 184.881573 
 127.209222 35.779667 182.174395 
 127.209222 35.779778 180.487339 
 127.209222 35.779889 178.915666 
 127.209222 35.780000 176.026425 
 127.209333 35.780000 178.749642 
 127.209333 35.780111 173.384399 
 127.209333 35.780222 166.689837 
 127.209444 35.780222 170.636897 
 127.209444 35.780333 167.338104 
 127.209444 35.780444 165.754828 
 127.209556 35.780444 167.785041 
 127.209556 35.780555 167.774274 
 127.209556 35.780667 168.948280 
 127.209667 35.780667 175.997109 
 127.209667 35.780778 179.820520 
 127.209667 35.780889 182.748561 
 127.209778 35.780889 187.131587 
 127.209778 35.781000 187.776391 
 127.209778 35.781111 188.623750 
 127.209889 35.781111 190.445086 
 127.209889 35.781222 191.836790 
 127.209889 35.781333 194.951942 
 127.209889 35.781444 198.266345 
 127.210000 35.781444 202.761126 
 127.210000 35.781555 201.423526 
 127.210000 35.781667 198.496030 
 127.210111 35.781667 197.511071 
 127.210111 35.781778 186.506023 
 127.210111 35.781889 178.144653 
 127.210222 35.781889 180.482616 
 127.210222 35.782000 175.206082 
 127.210222 35.782111 172.863318 
 127.210333 35.782111 178.759512 
 127.210333 35.782222 174.994651 
 127.210333 35.782333 173.750082 
 127.210444 35.782333 178.624168 
 127.210444 35.782444 178.154373 
 127.210444 35.782556 178.512377 
 127.210556 35.782556 186.691682 
 127.210556 35.782667 187.797980 
 127.210556 35.782778 188.709628 
 127.210556 35.782889 189.834153 
 127.210667 35.782889 193.902725 
 127.210667 35.783000 195.845293 
 127.210667 35.783111 200.050359 
 127.210778 35.783111 207.920279 
 127.210778 35.783222 212.914835 
 127.210778 35.783333 215.870912 
 127.210889 35.783333 217.777306 
 127.210889 35.783444 218.357418 
 127.210889 35.783556 219.146003 
 127.211000 35.783556 220.239348 
 127.211000 35.783667 222.604538 
 127.211000 35.783778 227.612283 
 127.211111 35.783778 232.348049 
 127.211111 35.783889 238.175565 
 127.211111 35.784000 241.266002 
 127.211111 35.784111 241.644452 
 127.211222 35.784111 241.424583 
 127.211222 35.784222 239.595518 
 127.211222 35.784333 235.974616 
 127.211333 35.784333 229.401986 
 127.211333 35.784444 223.325062 
 127.211333 35.784556 216.049019 
 127.211444 35.784556 200.885710 
 127.211444 35.784667 195.619710 
 127.211444 35.784778 190.670201 
 127.211556 35.784778 191.116126 
 127.211556 35.784889 188.200937 
 127.211556 35.785000 183.567663 
 127.211667 35.785000 186.437617 
 127.211667 35.785111 181.066035 
 127.211667 35.785222 171.439085 
 127.211667 35.785333 159.353519 
 127.211778 35.785333 161.416326 
 127.211778 35.785444 150.184553 
 127.211778 35.785556 142.998165 
 127.211889 35.785556 148.839153 
 127.211889 35.785667 143.891325 
 127.211889 35.785778 142.250519 
 127.212000 35.785778 145.507342 
 127.212000 35.785889 145.458838 
 127.212000 35.786000 146.495711 
 127.212111 35.786000 143.678023 
 127.212111 35.786111 145.625521 
 127.212111 35.786222 150.284269 
 127.212222 35.786222 142.206983 
 127.212222 35.786333 152.565687 
 127.212222 35.786444 165.509746 
 127.212222 35.786556 175.582743 
 127.212333 35.786556 168.671207 
 127.212333 35.786667 173.347312 
 127.212333 35.786778 177.603660 
 127.212444 35.786778 172.935054 
 127.212444 35.786889 176.231350 
 127.212444 35.787000 182.917011 
 127.212556 35.787000 178.795051 
 127.212556 35.787111 188.088125 
 127.212556 35.787222 199.966198 
 127.212667 35.787222 200.211794 
 127.212667 35.787333 204.322203 
 127.212667 35.787444 207.285939 
 127.212778 35.787444 203.925764 
 127.212778 35.787556 205.043849 
 127.212778 35.787667 206.551783 
 127.212778 35.787778 208.868627 
 127.212889 35.787778 204.733144 
 127.212889 35.787889 205.644160 
 127.212889 35.788000 206.677340 
 127.213000 35.788000 201.207646 
 127.213000 35.788111 202.162375 
 127.213000 35.788222 204.218896 
 127.213111 35.788222 191.511942 
 127.213111 35.788333 194.652292 
 127.213111 35.788444 201.687409 
 127.213222 35.788444 188.713562 
 127.213222 35.788556 193.623721 
 127.213222 35.788667 197.386589 
 127.213333 35.788778 195.623679 
 127.213333 35.788889 196.789379 
 127.213333 35.789000 197.682617 
 127.213444 35.789000 198.265351 
 127.213444 35.789111 200.423662 
 127.213444 35.789222 205.182121 
 127.213556 35.789222 216.281964 
 127.213556 35.789333 226.760297 
 127.213556 35.789445 234.804374 
 127.213667 35.789445 238.086535 
 127.213667 35.789556 242.459406 
 127.213667 35.789667 244.422894 
 127.213778 35.789667 245.794819 
 127.213778 35.789778 247.400992 
 127.213778 35.789889 249.292125 
 127.213778 35.790000 252.147895 
 127.213889 35.790000 261.219146 
 127.213889 35.790111 263.237276 
 127.213889 35.790222 263.520227 
 127.214000 35.790222 263.369914 
 127.214000 35.790333 259.547891 
 127.214000 35.790445 250.788091 
 127.214111 35.790445 241.979108 
 127.214111 35.790556 232.285955 
 127.214111 35.790667 226.769195 
 127.214222 35.790667 226.719315 
 127.214222 35.790778 224.593686 
 127.214222 35.790889 224.185111 
 127.214333 35.790889 223.626087 
 127.214333 35.791000 224.356020 
 127.214333 35.791111 225.151110 
 127.214333 35.791222 226.707350 
 127.214444 35.791222 227.391282 
 127.214444 35.791333 230.476531 
 127.214444 35.791445 238.406680 
 127.214556 35.791445 240.830316 
 127.214556 35.791556 250.687866 
 127.214556 35.791667 261.904738 
 127.214667 35.791667 260.285500 
 127.214667 35.791778 263.731547 
 127.214667 35.791889 265.673563 
 127.214778 35.791889 264.425912 
 127.214778 35.792000 265.239001 
 127.214778 35.792111 267.232158 
 127.214778 35.792222 270.960225 
 127.214889 35.792222 267.431515 
 127.214889 35.792333 269.616397 
 127.214889 35.792444 270.965768 
 127.215000 35.792444 263.333769 
 127.215000 35.792555 265.569936 
 127.215000 35.792667 267.384245 
 127.215111 35.792667 258.774781 
 127.215111 35.792778 259.763530 
 127.215111 35.792889 259.446929 
 127.215222 35.792889 254.926436 
 127.215222 35.793000 254.541523 
 127.215222 35.793111 254.165160 
 127.215333 35.793111 252.212093 
 127.215333 35.793222 249.856565 
 127.215333 35.793333 246.697929 
 127.215333 35.793444 243.071638 
 127.215444 35.793444 236.602298 
 127.215444 35.793555 235.404293 
 127.215444 35.793667 235.095315 
 127.215556 35.793667 230.790527 
 127.215556 35.793778 231.804251 
 127.215556 35.793889 233.773416 
 127.215667 35.793889 222.843855 
 127.215667 35.794000 227.684658 
 127.215667 35.794111 238.686834 
 127.215778 35.794111 224.863556 
 127.215778 35.794222 235.644813 
 127.215778 35.794333 251.015978 
 127.215778 35.794444 262.816278 
 127.215889 35.794444 247.574428 
 127.215889 35.794555 256.677109 
 127.215889 35.794667 260.230564 
 127.216000 35.794667 253.178603 
 127.216000 35.794778 256.646209 
 127.216000 35.794889 258.086151 
 127.216111 35.794889 248.180159 
 127.216111 35.795000 250.891951 
 127.216111 35.795111 253.985901 
 127.216222 35.795111 237.440634 
 127.216222 35.795222 242.058932 
 127.216222 35.795333 250.363605 
 127.216333 35.795333 247.971687 
 127.216333 35.795444 258.448869 
 127.216333 35.795556 265.743482 
 127.216333 35.795667 270.131031 
 127.216444 35.795667 269.422318 
 127.216444 35.795778 271.681766 
 127.216444 35.795889 275.613082 
 127.216556 35.795889 280.999729 
 127.216556 35.796000 288.085080 
 127.216556 35.796111 297.990249 
 127.216667 35.796111 306.485903 
 127.216667 35.796222 310.397188 
 127.216667 35.796333 316.063711 
 127.216778 35.796333 319.491143 
 127.216778 35.796444 329.241145 
 127.216778 35.796556 337.161920 
 127.216778 35.796667 341.529617 
 127.216889 35.796667 337.901910 
 127.216889 35.796778 339.900993 
 127.216889 35.796889 340.140127 
 127.217000 35.796889 334.448526 
 127.217000 35.797000 332.947862 
 127.217000 35.797111 329.849548 
 127.217111 35.797111 313.447536 
 127.217111 35.797222 312.354225 
 127.217111 35.797333 312.622147 
 127.217222 35.797333 308.445734 
 127.217222 35.797444 309.600544 
 127.217222 35.797556 313.245762 
 127.217222 35.797667 319.538538 
 127.217333 35.797667 308.458178 
 127.217333 35.797778 314.647788 
 127.217333 35.797889 318.736393 
 127.217444 35.797889 306.407120 
 127.217444 35.798000 311.225291 
 127.217444 35.798111 314.411847 
 127.217556 35.798111 300.664754 
 127.217556 35.798222 303.255463 
 127.217556 35.798333 307.448341 
 127.217667 35.798333 297.282190 
 127.217667 35.798444 299.960316 
 127.217667 35.798556 306.447535 
 127.217778 35.798667 307.768880 
 127.217778 35.798778 312.124726 
 127.217778 35.798889 314.993013 
 127.217889 35.798889 311.913541 
 127.217889 35.799000 313.829353 
 127.217889 35.799111 317.317611 
 127.218000 35.799111 313.866645 
 127.218000 35.799222 319.083035 
 127.218000 35.799333 325.421931 
 127.218111 35.799333 317.370838 
 127.218111 35.799444 321.632652 
 127.218111 35.799556 324.693455 
 127.218222 35.799556 322.402991 
 127.218222 35.799667 325.816967 
 127.218222 35.799778 333.233061 
 127.218222 35.799889 345.137780 
 127.218333 35.799889 345.851797 
 127.218333 35.800000 349.086181 
 127.218333 35.800111 352.559725 
 127.218444 35.800111 352.605971 
 127.218444 35.800222 362.494857 
 127.218444 35.800333 379.500892 
 127.218556 35.800333 383.382176 
 127.218556 35.800444 386.805488 
 127.218556 35.800556 387.202768 
 127.218667 35.800556 383.711335 
 127.218667 35.800667 374.972615 
 127.218667 35.800778 358.752970 
 127.218667 35.800889 350.276038 
 127.218778 35.800889 349.270307 
 127.218778 35.801000 346.245099 
 127.218778 35.801111 345.264440 
 127.218889 35.801111 340.009530 
 127.218889 35.801222 340.132533 
 127.218889 35.801333 340.955152 
 127.219000 35.801333 339.225385 
 127.219000 35.801444 342.455033 
 127.219000 35.801556 347.457280 
 127.219111 35.801556 352.923162 
 127.219111 35.801667 367.530237 
 127.219111 35.801778 384.613404 
 127.219111 35.801889 398.197339 
 127.219222 35.801889 391.595032 
 127.219222 35.802000 403.003483 
 127.219222 35.802111 407.845462 
 127.219333 35.802111 394.120530 
 127.219333 35.802222 402.404665 
 127.219333 35.802333 405.982841 
 127.219444 35.802333 399.757038 
 127.219444 35.802445 406.926214 
 127.219444 35.802556 409.027739 
 127.219556 35.802556 407.000004 
 127.219556 35.802667 408.274329 
 127.219556 35.802778 406.002790 
 127.219556 35.802889 398.905681 
 127.219667 35.802889 394.826961 
 127.219667 35.803000 387.718553 
 127.219667 35.803111 381.964164 
 127.219778 35.803111 387.525584 
 127.219778 35.803222 386.680294 
 127.219778 35.803333 385.060590 
 127.219889 35.803333 387.597586 
 127.219889 35.803445 385.506675 
 127.219889 35.803556 380.771588 
 127.220000 35.803556 378.627458 
 127.220000 35.803667 375.203662 
 127.220000 35.803778 369.955111 
 127.220000 35.803889 360.708276 
 127.220111 35.803889 368.248512 
 127.220111 35.804000 357.520625 
 127.220111 35.804111 343.063706 
 127.220222 35.804111 356.589932 
 127.220222 35.804222 346.520143 
 127.220222 35.804333 341.272722 
 127.220333 35.804333 355.083853 
 127.220333 35.804444 353.424228 
 127.220333 35.804556 352.666876 
 127.220444 35.804556 355.075286 
 127.220444 35.804667 353.446700 
 127.220444 35.804778 349.909970 
 127.220444 35.804889 341.571718 
 127.220556 35.804889 336.197160 
 127.220556 35.805000 328.548466 
 127.220556 35.805111 326.045812 
 127.220667 35.805111 328.171620 
 127.220667 35.805222 327.094084 
 127.220667 35.805333 327.115248 
 127.220778 35.805333 329.012563 
 127.220778 35.805444 328.551625 
 127.220778 35.805555 328.477804 
 127.220889 35.805555 329.054603 
 127.220889 35.805667 328.723766 
 127.220889 35.805778 327.554098 
 127.220889 35.805889 325.520737 
 127.221000 35.805889 331.148014 
 127.221000 35.806000 329.438638 
 127.221000 35.806111 327.898853 
 127.221111 35.806111 330.866668 
 127.221111 35.806222 327.973813 
 127.221111 35.806333 324.491693 
 127.221222 35.806333 321.285090 
 127.221222 35.806444 317.820486 
 127.221222 35.806555 313.505401 
 127.221333 35.806555 315.620737 
 127.221333 35.806667 311.450877 
 127.221333 35.806778 306.283525 
 127.221333 35.806889 301.477141 
 127.221444 35.806889 303.747690 
 127.221444 35.807000 300.657504 
 127.221444 35.807111 297.590638 
 127.221556 35.807111 302.949404 
 127.221556 35.807222 300.695335 
 127.221556 35.807333 297.898884 
 127.221667 35.807333 305.374449 
 127.221667 35.807444 300.984193 
 127.221667 35.807556 296.121111 
 127.221778 35.807556 292.183776 
 127.221778 35.807667 287.670116 
 127.221778 35.807778 286.535024 
 127.221778 35.807889 287.011793 
 127.221889 35.807889 286.463196 
 127.221889 35.808000 288.179827 
 127.221889 35.808111 291.781840 
 127.222000 35.808111 305.311714 
 127.222000 35.808222 310.483684 
 127.222000 35.808333 317.115373 
 127.222111 35.808333 321.255376 
 127.222111 35.808444 326.105125 
 127.222111 35.808556 334.468537 
 127.222222 35.808556 348.216452 
 127.222222 35.808667 355.716224 
 127.222222 35.808778 359.287929 
 127.222222 35.808889 360.275923 
 127.222333 35.808889 362.176640 
 127.222333 35.809000 362.378726 
 127.222333 35.809111 362.428035 
 127.222444 35.809111 369.739789 
 127.222444 35.809222 374.098508 
 127.222444 35.809333 376.249066 
 127.222556 35.809333 383.007417 
 127.222556 35.809444 383.063664 
 127.222556 35.809556 382.374422 
 127.222667 35.809556 383.627389 
 127.222667 35.809667 382.114956 
 127.222667 35.809778 379.466631 
 127.222667 35.809889 375.591083 
 127.222778 35.809889 367.207750 
 127.222778 35.810000 363.757641 
 127.222778 35.810111 361.548710 
 127.222889 35.810111 359.792618 
 127.222889 35.810222 354.260797 
 127.222889 35.810333 347.217278 
 127.223000 35.810333 332.900351 
 127.223000 35.810444 325.207109 
 127.223000 35.810556 321.203729 
 127.223111 35.810556 320.145437 
 127.223111 35.810667 317.728126 
 127.223111 35.810778 316.050811 
 127.223111 35.810889 313.860321 
 127.223222 35.810889 310.008592 
 127.223222 35.811000 305.417048 
 127.223222 35.811111 301.401461 
 127.223333 35.811111 290.385818 
 127.223333 35.811222 288.011912 
 127.223333 35.811333 286.463587 
 127.223444 35.811333 285.599396 
 127.223444 35.811444 284.757178 
 127.223444 35.811556 283.048276 
 127.223556 35.811556 283.254179 
 127.223556 35.811667 280.300470 
 127.223556 35.811778 273.191213 
 127.223667 35.811889 260.216813 
 127.223667 35.812000 254.446070 
 127.223667 35.812111 251.877032 
 127.223778 35.812111 245.189056 
 127.223778 35.812222 242.881146 
 127.223778 35.812333 241.755668 
 127.223889 35.812333 240.179668 
 127.223889 35.812444 239.345160 
 127.223889 35.812556 238.911023 
 127.224000 35.812556 238.962002 
 127.224000 35.812667 237.445764 
 127.224000 35.812778 234.462406 
 127.224111 35.812889 225.720443 
 127.224111 35.813000 222.622307 
 127.224111 35.813111 221.476877 
 127.224222 35.813111 223.319981 
 127.224222 35.813222 222.385255 
 127.224222 35.813333 221.787929 
 127.224333 35.813333 225.830205 
 127.224333 35.813444 224.002870 
 127.224333 35.813556 221.902492 
 127.224444 35.813556 225.061309 
 127.224444 35.813667 223.245864 
 127.224444 35.813778 221.344586 
 127.224556 35.813778 226.505809 
 127.224556 35.813889 223.404411 
 127.224556 35.814000 221.420382 
 127.224556 35.814111 220.980227 
 127.224667 35.814111 227.035833 
 127.224667 35.814222 228.147558 
 127.224667 35.814333 230.402369 
 127.224778 35.814333 239.095588 
 127.224778 35.814445 240.582729 
 127.224778 35.814556 241.292037 
 127.224889 35.814556 243.146798 
 127.224889 35.814667 243.427300 
 127.224889 35.814778 244.060266 
 127.225000 35.814778 252.223620 
 127.225000 35.814889 255.074952 
 127.225000 35.815000 257.258252 
 127.225000 35.815111 258.126688 
 127.225111 35.815111 261.597024 
 127.225111 35.815222 260.973079 
 127.225111 35.815333 259.588053 
 127.225222 35.815333 260.522540 
 127.225222 35.815445 256.519218 
 127.225222 35.815556 251.730099 
 127.225333 35.815556 251.489096 
 127.225333 35.815667 248.407922 
 127.225333 35.815778 246.948787 
 127.225444 35.815778 248.416079 
 127.225444 35.815889 246.143121 
 127.225444 35.816000 242.242209 
 127.225444 35.816111 236.924565 
 127.225556 35.816111 235.657396 
 127.225556 35.816222 231.321833 
 127.225556 35.816333 228.369315 
 127.225667 35.816333 225.686227 
 127.225667 35.816445 219.172348 
 127.225667 35.816556 215.686637 
 127.225778 35.816556 218.768700 
 127.225778 35.816667 215.975557 
 127.225778 35.816778 216.491261 
 127.225889 35.816778 224.733350 
 127.225889 35.816889 227.209889 
 127.225889 35.817000 233.388454 
 127.225889 35.817111 239.696955 
 127.226000 35.817111 234.095152 
 127.226000 35.817222 242.988558 
 127.226000 35.817333 251.542161 
 127.226111 35.817333 246.997741 
 127.226111 35.817444 260.978206 
 127.226111 35.817555 270.842968 
 127.226222 35.817555 262.027212 
 127.226222 35.817667 271.934069 
 127.226222 35.817778 279.022200 
 127.226333 35.817778 279.847781 
 127.226333 35.817889 292.455717 
 127.226333 35.818000 300.413841 
 127.226444 35.818000 304.012500 
 127.226444 35.818111 308.286850 
 127.226444 35.818222 308.925166 
 127.226444 35.818333 306.912844 
 127.226556 35.818333 301.888831 
 127.226556 35.818444 297.039415 
 127.226556 35.818555 290.481814 
 127.226667 35.818555 286.330563 
 127.226667 35.818667 284.640501 
 127.226667 35.818778 282.496883 
 127.226778 35.818778 285.236180 
 127.226778 35.818889 282.160613 
 127.226778 35.819000 274.550026 
 127.226889 35.819000 273.314146 
 127.226889 35.819111 258.829857 
 127.226889 35.819222 248.127310 
 127.226889 35.819333 243.472478 
 127.227000 35.819333 245.266449 
 127.227000 35.819444 243.129235 
 127.227000 35.819555 242.076885 
 127.227111 35.819555 244.832899 
 127.227111 35.819667 242.946696 
 127.227111 35.819778 241.632565 
 127.227222 35.819778 241.466782 
 127.227222 35.819889 239.544387 
 127.227222 35.820000 239.996325 
 127.227333 35.820000 238.124861 
 127.227333 35.820111 239.500207 
 127.227333 35.820222 243.763127 
 127.227444 35.820222 245.859349 
 127.227444 35.820333 252.648324 
 127.227444 35.820444 258.204960 
 127.227444 35.820556 261.335530 
 127.227556 35.820556 260.461202 
 127.227556 35.820667 264.996336 
 127.227556 35.820778 270.124526 
 127.227667 35.820778 284.082848 
 127.227667 35.820889 289.533322 
 127.227667 35.821000 292.828864 
 127.227778 35.821000 292.671868 
 127.227778 35.821111 294.628148 
 127.227778 35.821222 295.868380 
 127.227889 35.821222 297.291014 
 127.227889 35.821333 300.131408 
 127.227889 35.821444 305.968206 
 127.227889 35.821556 317.285232 
 127.228000 35.821556 338.488877 
 127.228000 35.821667 346.001376 
 127.228000 35.821778 349.069235 
 127.228111 35.821778 351.714754 
 127.228111 35.821889 351.374083 
 127.228111 35.822000 349.261575 
 127.228222 35.822000 350.653510 
 127.228222 35.822111 347.839977 
 127.228222 35.822222 341.598037 
 127.228333 35.822222 340.025748 
 127.228333 35.822333 331.884309 
 127.228333 35.822444 324.578927 
 127.228444 35.822444 330.603420 
 127.228444 35.822556 326.347742 
 127.228444 35.822667 323.367046 
 127.228444 35.822778 320.014880 
 127.228556 35.822778 323.142644 
 127.228556 35.822889 319.685942 
 127.228556 35.823000 313.247418 
 127.228667 35.823000 309.323042 
 127.228667 35.823111 304.542747 
 127.228667 35.823222 299.162461 
 127.228778 35.823222 301.365772 
 127.228778 35.823333 298.068307 
 127.228778 35.823444 290.245741 
 127.228889 35.823444 284.733646 
 127.228889 35.823556 267.919274 
 127.228889 35.823667 254.525933 
 127.228889 35.823778 248.483387 
 127.229000 35.823778 249.499104 
 127.229000 35.823889 247.132853 
 127.229000 35.824000 245.356964 
 127.229111 35.824000 241.212633 
 127.229111 35.824111 236.777403 
 127.229111 35.824222 232.302296 
 127.229222 35.824222 225.930562 
 127.229222 35.824333 224.420052 
 127.229222 35.824444 224.037663 
 127.229333 35.824444 225.962803 
 127.229333 35.824556 227.346268 
 127.229333 35.824667 229.741532 
 127.229444 35.824667 239.430282 
 127.229444 35.824778 241.279654 
 127.229444 35.824889 243.596233 
 127.229444 35.825000 247.402182 
 127.229556 35.825000 247.994741 
 127.229556 35.825111 253.470671 
 127.229556 35.825222 258.029639 
 127.229667 35.825222 259.091374 
 127.229667 35.825333 262.616316 
 127.229667 35.825444 265.018018 
 127.229778 35.825444 278.513746 
 127.229778 35.825556 280.195057 
 127.229778 35.825667 282.135661 
 127.229889 35.825667 284.146103 
 127.229889 35.825778 287.882395 
 127.229889 35.825889 296.218054 
 127.230000 35.826000 309.038504 
 127.230000 35.826111 312.578224 
 127.230000 35.826222 312.369890 
 127.230111 35.826222 303.857592 
 127.230111 35.826333 291.745009 
 127.230111 35.826444 281.212115 
 127.230222 35.826444 279.177089 
 127.230222 35.826556 274.352439 
 127.230222 35.826667 272.004173 
 127.230333 35.826667 270.924652 
 127.230333 35.826778 268.745748 
 127.230333 35.826889 265.818745 
 127.230444 35.826889 257.737466 
 127.230444 35.827000 251.558612 
 127.230444 35.827111 239.385451 
 127.230444 35.827222 232.299011 
 127.230556 35.827222 238.598304 
 127.230556 35.827333 235.994654 
 127.230556 35.827445 235.154973 
 127.230667 35.827445 237.818194 
 127.230667 35.827556 237.377916 
 127.230667 35.827667 237.265169 
 127.230778 35.827667 240.336408 
 127.230778 35.827778 241.187128 
 127.230778 35.827889 242.960555 
 127.230889 35.827889 257.997830 
 127.230889 35.828000 260.503865 
 127.230889 35.828111 260.332961 
 127.231000 35.828111 268.517745 
 127.231000 35.828222 268.331329 
 127.231000 35.828333 267.861803 
 127.231000 35.828445 268.053273 
 127.231111 35.828445 268.534294 
 127.231111 35.828556 269.413967 
 127.231111 35.828667 272.069977 
 127.231222 35.828667 272.354951 
 127.231222 35.828778 278.401812 
 127.231222 35.828889 286.725498 
 127.231333 35.828889 289.091753 
 127.231333 35.829000 295.708956 
 127.231333 35.829111 299.935122 
 127.231444 35.829111 316.038732 
 127.231444 35.829222 320.450337 
 127.231444 35.829333 323.252990 
 127.231556 35.829333 328.173430 
 127.231556 35.829444 330.157566 
 127.231556 35.829556 332.777884 
 127.231556 35.829667 336.341236 
 127.231667 35.829667 350.504871 
 127.231667 35.829778 351.092502 
 127.231667 35.829889 345.608791 
 127.231778 35.829889 345.906584 
 127.231778 35.830000 334.447650 
 127.231778 35.830111 320.088429 
 127.231889 35.830111 310.192227 
 127.231889 35.830222 305.177334 
 127.231889 35.830333 299.805680 
 127.232000 35.830333 296.751582 
 127.232000 35.830444 287.593837 
 127.232000 35.830555 280.642799 
 127.232111 35.830667 279.592834 
 127.232111 35.830778 277.662766 
 127.232111 35.830889 276.519046 
 127.232222 35.830889 278.052883 
 127.232222 35.831000 275.716764 
 127.232222 35.831111 274.095206 
 127.232333 35.831111 280.213006 
 127.232333 35.831222 274.092467 
 127.232333 35.831333 270.242217 
 127.232444 35.831333 270.399509 
 127.232444 35.831444 265.526195 
 127.232444 35.831555 263.672707 
 127.232556 35.831555 268.852994 
 127.232556 35.831667 266.967548 
 127.232556 35.831778 266.290586 
 127.232556 35.831889 266.292434 
 127.232667 35.831889 276.702747 
 127.232667 35.832000 274.780942 
 127.232667 35.832111 270.896729 
 127.232778 35.832111 277.575078 
 127.232778 35.832222 269.750134 
 127.232778 35.832333 258.842299 
 127.232889 35.832333 272.321437 
 127.232889 35.832444 260.532279 
 127.232889 35.832556 252.646080 
 127.233000 35.832556 267.199083 
 127.233000 35.832667 261.684473 
 127.233000 35.832778 259.026673 
 127.233111 35.832778 262.773851 
 127.233111 35.832889 262.827495 
 127.233111 35.833000 264.353582 
 127.233111 35.833111 266.647423 
 127.233222 35.833111 270.600860 
 127.233222 35.833222 271.334164 
 127.233222 35.833333 272.094316 
 127.233333 35.833333 274.821856 
 127.233333 35.833444 277.137470 
 127.233333 35.833556 280.589599 
 127.233444 35.833556 285.807220 
 127.233444 35.833667 286.468360 
 127.233444 35.833778 286.473809 
 127.233556 35.833778 289.065262 
 127.233556 35.833889 288.683464 
 127.233556 35.834000 288.569195 
 127.233667 35.834000 297.145437 
 127.233667 35.834111 295.064627 
 127.233667 35.834222 293.710101 
 127.233667 35.834333 293.294850 
 127.233778 35.834333 302.992988 
 127.233778 35.834444 302.700158 
 127.233778 35.834556 303.669230 
 127.233889 35.834556 307.798809 
 127.233889 35.834667 309.618627 
 127.233889 35.834778 315.122654 
 127.234000 35.834778 323.830982 
 127.234000 35.834889 333.634222 
 127.234000 35.835000 340.509536 
 127.234111 35.835000 341.759489 
 127.234111 35.835111 342.919759 
 127.234111 35.835222 343.238584 
 127.234222 35.835222 340.169122 
 127.234222 35.835333 339.966703 
 127.234222 35.835444 339.925261 
 127.234222 35.835556 340.376890 
 127.234333 35.835556 338.212871 
 127.234333 35.835667 337.874007 
 127.234333 35.835778 337.429326 
 127.234444 35.835778 330.614391 
 127.234444 35.835889 329.240095 
 127.234444 35.836000 328.048216 
 127.234556 35.836000 326.472312 
 127.234556 35.836111 325.414185 
 127.234556 35.836222 321.688896 
 127.234667 35.836222 318.201193 
 127.234667 35.836333 315.448826 
 127.234667 35.836444 311.317210 
 127.234778 35.836444 312.474182 
 127.234778 35.836556 305.834827 
 127.234778 35.836667 290.339322 
 127.234778 35.836778 271.551775 
 127.234889 35.836778 272.799593 
 127.234889 35.836889 260.082245 
 127.234889 35.837000 254.421258 
 127.235000 35.837000 246.004442 
 127.235000 35.837111 238.961615 
 127.235000 35.837222 237.917153 
 127.235111 35.837222 234.363596 
 127.235111 35.837333 233.168490 
 127.235111 35.837444 233.816916 
 127.235222 35.837444 233.039308 
 127.235222 35.837556 232.442406 
 127.235222 35.837667 234.099163 
 127.235333 35.837667 231.340665 
 127.235333 35.837778 234.158975 
 127.235333 35.837889 236.367368 
 127.235333 35.838000 237.184352 
 127.235444 35.838000 232.752460 
 127.235444 35.838111 234.156756 
 127.235444 35.838222 233.832204 
 127.235556 35.838222 223.353918 
 127.235556 35.838333 224.352259 
 127.235556 35.838444 223.554020 
 127.235667 35.838444 219.597624 
 127.235667 35.838556 221.059953 
 127.235667 35.838667 221.426421 
 127.235778 35.838667 219.240936 
 127.235778 35.838778 219.661917 
 127.235778 35.838889 215.673644 
 127.235778 35.839000 204.366998 
 127.235889 35.839000 199.351067 
 127.235889 35.839111 186.921561 
 127.235889 35.839222 179.534170 
 127.236000 35.839222 184.570943 
 127.236000 35.839333 177.055245 
 127.236000 35.839445 174.743433 
 127.236111 35.839445 171.511330 
 127.236111 35.839556 168.927702 
 127.236111 35.839667 168.526364 
 127.236222 35.839667 165.649099 
 127.236222 35.839778 166.010463 
 127.236222 35.839889 167.648134 
 127.236333 35.839889 163.966118 
 127.236333 35.840000 169.159963 
 127.236333 35.840111 176.465519 
 127.236333 35.840222 179.912013 
 127.236444 35.840222 178.006659 
 127.236444 35.840333 178.828933 
 127.236444 35.840445 178.600571 
 127.236556 35.840445 177.785396 
 127.236556 35.840556 176.996260 
 127.236556 35.840667 174.641567 
 127.236667 35.840667 174.374322 
 127.236667 35.840778 170.232502 
 127.236667 35.840889 162.529875 
 127.236778 35.840889 153.249614 
 127.236778 35.841000 146.974250 
 127.236778 35.841111 144.187598 
 127.236889 35.841111 142.270818 
 127.236889 35.841222 141.550948 
 127.236889 35.841333 140.885237 
 127.236889 35.841445 139.798784 
 127.237000 35.841445 133.804346 
 127.237000 35.841556 131.236578 
 127.237000 35.841667 128.819700 
 127.237111 35.841667 125.501485 
 127.237111 35.841778 124.677150 
 127.237111 35.841889 124.551577 
 127.237222 35.841889 123.594999 
 127.237222 35.842000 122.856156 
 127.237222 35.842111 121.118216 
 127.237333 35.842111 118.860418 
 127.237333 35.842222 116.639798 
 127.237333 35.842333 115.461528 
 127.237444 35.842333 111.775922 
 127.237444 35.842444 110.890764 
 127.237444 35.842555 110.408530 
 127.237444 35.842667 110.145378 
 127.237556 35.842667 108.636883 
 127.237556 35.842778 108.626837 
 127.237556 35.842889 108.667458 
 127.237667 35.842889 107.015947 
 127.237667 35.843000 106.272853 
 127.237667 35.843111 105.788538 
 127.237778 35.843111 104.368195 
 127.237778 35.843222 104.434127 
 127.237778 35.843333 104.479366 
 127.237889 35.843333 103.370056 
 127.237889 35.843444 103.293064 
 127.237889 35.843555 103.003049 
 127.238000 35.843555 98.707550 
 127.238000 35.843667 98.745685 
 127.238000 35.843778 98.975696 
 127.238000 35.843889 99.138675 
 127.238111 35.843889 96.864873 
 127.238111 35.844000 96.916963 
 127.238111 35.844111 96.479979 
 127.238222 35.844111 92.585398 
 127.238222 35.844222 92.107605 
 127.238222 35.844333 91.534974 
 127.238333 35.844333 89.307559 
 127.238333 35.844444 88.578511 
 127.238333 35.844555 87.976986 
 127.238444 35.844555 84.990911 
 127.238444 35.844667 84.312796 
 127.238444 35.844778 83.883675 
 127.238556 35.844778 83.173852 
 127.238556 35.844889 83.006951 
 127.238556 35.845000 82.816870 
 127.238556 35.845111 82.503758 
 127.238667 35.845111 82.660899 
 127.238667 35.845222 82.027560 
 127.238667 35.845333 81.152951 
 127.238778 35.845333 81.988014 
 127.238778 35.845444 81.140405 
 127.238778 35.845556 80.407890 
 127.238889 35.845556 80.759019 
 127.238889 35.845667 80.085635 
 127.238889 35.845778 79.768268 
 127.239000 35.845778 79.852138 
 127.239000 35.845889 79.673263 
 127.239000 35.846000 79.631285 
 127.239111 35.846000 79.957845 
 127.239111 35.846111 79.974052 
 127.239111 35.846222 80.192685 
 127.239111 35.846333 80.385568 
 127.239222 35.846333 80.506308 
 127.239222 35.846444 80.446249 
 127.239222 35.846556 80.371418 
 127.239333 35.846556 80.030048 
 127.239333 35.846667 79.918247 
 127.239333 35.846778 79.696033 
 127.239444 35.846778 79.709319 
 127.239444 35.846889 79.507269 
 127.239444 35.847000 79.080017 
 127.239556 35.847000 79.249037 
 127.239556 35.847111 78.835071 
 127.239556 35.847222 78.096949 
 127.239667 35.847222 78.875654 
 127.239667 35.847333 78.269531 
 127.239667 35.847444 77.507193 
 127.239667 35.847556 76.958828 
 127.239778 35.847556 78.089716 
 127.239778 35.847667 77.795778 
 127.239778 35.847778 77.471020 
 127.239889 35.847778 78.114921 
 127.239889 35.847889 77.835053 
 127.239889 35.848000 77.378583 
 127.240000 35.848000 78.172028 
 127.240000 35.848111 77.757627 
 127.240000 35.848222 77.140210 
 127.240111 35.848222 78.496948 
 127.240111 35.848333 78.071657 
 127.240111 35.848444 77.277795 
 127.240222 35.848444 78.525627 
 127.240222 35.848556 78.019784 
 127.240222 35.848667 77.012289 
 127.240333 35.848778 77.837601 
 127.240333 35.848889 76.494439 
 127.240333 35.849000 74.978847 
 127.240444 35.849000 77.003123 
 127.240444 35.849111 75.609002 
 127.240444 35.849222 74.546823 
 127.240556 35.849222 77.006377 
 127.240556 35.849333 76.451548 
 127.240556 35.849444 76.189620 
 127.240667 35.849444 78.329278 
 127.240667 35.849556 78.797969 
 127.240667 35.849667 80.060032 
 127.240778 35.849667 82.626570 
 127.240778 35.849778 84.766907 
 127.240778 35.849889 88.186931 
 127.240889 35.850000 96.238057 
 127.240889 35.850111 100.615109 
 127.240889 35.850222 103.106153 
 127.241000 35.850222 103.035610 
 127.241000 35.850333 105.361910 
 127.241000 35.850444 106.432486 
 127.241111 35.850444 111.565063 
 127.241111 35.850556 113.693223 
 127.241111 35.850667 113.413641 
 127.241222 35.850667 116.983949 
 127.241222 35.850778 116.091045 
 127.241222 35.850889 112.062195 
 127.241333 35.850889 109.680231 
 127.241333 35.851000 101.108472 
 127.241333 35.851111 90.862470 
 127.241444 35.851111 88.762992 
 127.241444 35.851222 87.342911 
 127.241444 35.851333 87.778331 
 127.241444 35.851444 90.504185 
 127.241556 35.851444 93.183083 
 127.241556 35.851556 98.196245 
 127.241556 35.851667 102.907080 
 127.241667 35.851667 102.434867 
 127.241667 35.851778 105.209560 
 127.241667 35.851889 106.789209 
 127.241778 35.851889 103.712264 
 127.241778 35.852000 106.953771 
 127.241778 35.852111 109.231836 
 127.241889 35.852111 110.167563 
 127.241889 35.852222 113.476845 
 127.241889 35.852333 115.841487 
 127.242000 35.852333 120.216004 
 127.242000 35.852445 122.878898 
 127.242000 35.852556 123.962239 
 127.242000 35.852667 124.416703 
 127.242111 35.852667 126.350456 
 127.242111 35.852778 126.572770 
 127.242111 35.852889 127.904781 
 127.242222 35.852889 130.921266 
 127.242222 35.853000 133.890213 
 127.242222 35.853111 138.962705 
 127.242333 35.853111 140.838998 
 127.242333 35.853222 143.841967 
 127.242333 35.853333 147.254100 
 127.242444 35.853333 146.927111 
 127.242444 35.853445 150.667711 
 127.242444 35.853556 152.882979 
 127.242556 35.853556 154.223319 
 127.242556 35.853667 155.100394 
 127.242556 35.853778 155.389620 
 127.242556 35.853889 155.644644 
 127.242667 35.853889 159.647877 
 127.242667 35.854000 159.913236 
 127.242667 35.854111 160.592205 
 127.242778 35.854111 161.838245 
 127.242778 35.854222 162.346666 
 127.242778 35.854333 164.192510 
 127.242889 35.854333 163.505058 
 127.242889 35.854445 161.607620 
 127.242889 35.854556 159.748650 
 127.243000 35.854556 159.672202 
 127.243000 35.854667 155.716750 
 127.243000 35.854778 152.307347 
 127.243111 35.854778 148.197555 
 127.243111 35.854889 140.655770 
 127.243111 35.855000 135.560584 
 127.243111 35.855111 132.349947 
 127.243222 35.855111 132.366773 
 127.243222 35.855222 128.078020 
 127.243222 35.855333 122.134857 
 127.243333 35.855333 112.110229 
 127.243333 35.855444 102.138112 
 127.243333 35.855555 94.718008 
 127.243444 35.855555 96.760359 
 127.243444 35.855667 91.616731 
 127.243444 35.855778 88.917179 
 127.243556 35.855778 90.211847 
 127.243556 35.855889 86.708707 
 127.243556 35.856000 82.310529 
 127.243667 35.856000 74.209974 
 127.243667 35.856111 70.824657 
 127.243667 35.856222 69.380011 
 127.243778 35.856333 68.562597 
 127.243778 35.856444 68.123825 
 127.243778 35.856555 67.346273 
 127.243889 35.856555 68.869929 
 127.243889 35.856667 66.496107 
 127.243889 35.856778 65.530517 
 127.244000 35.856778 66.740783 
 127.244000 35.856889 65.413969 
 127.244000 35.857000 64.966207 
 127.244111 35.857000 65.754110 
 127.244111 35.857111 64.709026 
 127.244111 35.857222 64.326578 
 127.244222 35.857222 64.257966 
 127.244222 35.857333 64.062860 
 127.244222 35.857444 64.047278 
 127.244333 35.857444 64.344447 
 127.244333 35.857556 64.442003 
 127.244333 35.857667 64.664089 
 127.244333 35.857778 64.807610 
 127.244444 35.857778 64.984327 
 127.244444 35.857889 64.943035 
 127.244444 35.858000 64.848884 
 127.244556 35.858000 64.917826 
 127.244556 35.858111 64.734920 
 127.244556 35.858222 64.479074 
 127.244667 35.858222 64.588023 
 127.244667 35.858333 64.399096 
 127.244667 35.858444 64.323014 
 127.244778 35.858444 64.554107 
 127.244778 35.858556 64.473302 
 127.244778 35.858667 64.469757 
 127.244889 35.858667 64.861198 
 127.244889 35.858778 64.788286 
 127.244889 35.858889 64.771077 
 127.244889 35.859000 64.774991 
 127.245000 35.859000 64.822434 
 127.245000 35.859111 64.820750 
 127.245000 35.859222 64.844642 
 127.245111 35.859222 64.873909 
 127.245111 35.859333 64.898575 
 127.245111 35.859444 64.946129 
 127.245222 35.859444 64.981916 
 127.245222 35.859556 64.987101 
 127.245222 35.859667 64.987660 
 127.245333 35.859667 65.005586 
 127.245333 35.859778 65.003553 
 127.245333 35.859889 64.998309 
 127.245444 35.859889 65.005491 
 127.245444 35.860000 64.991184 
 127.245444 35.860111 64.963497 
 127.245444 35.860222 64.935905 
 127.245556 35.860222 64.871965 
 127.245556 35.860333 64.839826 
 127.245556 35.860444 64.808561 
 127.245667 35.860444 64.620674 
 127.245667 35.860556 64.570478 
 127.245667 35.860667 64.461293 
 127.245778 35.860667 64.523221 
 127.245778 35.860778 64.440455 
 127.245778 35.860889 64.300995 
 127.245889 35.860889 64.342360 
 127.245889 35.861000 64.259751 
 127.245889 35.861111 64.204510 
 127.246000 35.861111 64.241970 
 127.246000 35.861222 64.268266 
 127.246000 35.861333 64.320154 
 127.246000 35.861444 64.379977 
 127.246111 35.861444 64.601179 
 127.246111 35.861556 64.644168 
 127.246111 35.861667 64.621726 
 127.246222 35.861667 64.786744 
 127.246222 35.861778 64.688063 
 127.246222 35.861889 64.572240 
 127.246333 35.861889 64.660959 
 127.246333 35.862000 64.585722 
 127.246333 35.862111 64.645404 
 127.246444 35.862111 64.693446 
 127.246444 35.862222 65.524125 
 127.246444 35.862333 67.412227 
 127.246556 35.862333 67.200755 
 127.246556 35.862444 68.805831 
 127.246556 35.862556 70.190426 
 127.246667 35.862667 70.160335 
 127.246667 35.862778 70.105174 
 127.246667 35.862889 69.539658 
 127.246778 35.862889 69.991447 
 127.246778 35.863000 69.191806 
 127.246778 35.863111 67.877901 
 127.246889 35.863111 69.076261 
 127.246889 35.863222 66.971621 
 127.246889 35.863333 65.379629 
 127.247000 35.863333 65.823697 
 127.247000 35.863444 64.678263 
 127.247000 35.863556 64.257929 
 127.247111 35.863556 64.742566 
 127.247111 35.863667 64.531418 
 127.247111 35.863778 64.629726 
 127.247222 35.863778 65.532014 
 127.247222 35.863889 65.563208 
 127.247222 35.864000 65.659606 
 127.247222 35.864111 65.888635 
 127.247333 35.864111 65.841184 
 127.247333 35.864222 66.060228 
 127.247333 35.864333 66.426393 
 127.247444 35.864333 66.529067 
 127.247444 35.864445 66.525115 
 127.247444 35.864556 66.550809 
 127.247556 35.864556 67.080279 
 127.247556 35.864667 67.057489 
 127.247556 35.864778 67.466009 
 127.247667 35.864778 68.596635 
 127.247667 35.864889 69.201519 
 127.247667 35.865000 69.675916 
 127.247778 35.865000 69.557675 
 127.247778 35.865111 69.852666 
 127.247778 35.865222 69.954029 
 127.247778 35.865333 69.970599 
 127.247889 35.865333 70.052260 
 127.247889 35.865445 69.960602 
 127.247889 35.865556 69.899401 
 127.248000 35.865556 69.869377 
 127.248000 35.865667 69.821355 
 127.248000 35.865778 69.814944 
 127.248111 35.865778 69.757693 
 127.248111 35.865889 69.782211 
 127.248111 35.866000 69.825849 
 127.248222 35.866000 69.740500 
 127.248222 35.866111 69.814533 
 127.248222 35.866222 69.981540 
 127.248333 35.866222 69.997909 
 127.248333 35.866333 70.381095 
 127.248333 35.866445 70.750453 
 127.248333 35.866556 70.938341 
 127.248444 35.866556 70.962094 
 127.248444 35.866667 70.989903 
 127.248444 35.866778 70.987018 
 127.248556 35.866778 70.837345 
 127.248556 35.866889 70.802231 
 127.248556 35.867000 70.739313 
 127.248667 35.867000 70.066289 
 127.248667 35.867111 70.031315 
 127.248667 35.867222 70.141396 
 127.248778 35.867222 69.886855 
 127.248778 35.867333 70.069408 
 127.248778 35.867444 70.403566 
 127.248889 35.867444 70.388964 
 127.248889 35.867555 70.786500 
 127.248889 35.867667 71.114064 
 127.249000 35.867667 71.026798 
 127.249000 35.867778 71.266185 
 127.249000 35.867889 71.485172 
 127.249000 35.868000 71.773450 
 127.249111 35.868000 71.688529 
 127.249111 35.868111 72.356426 
 127.249111 35.868222 73.045895 
 127.249222 35.868222 72.735288 
 127.249222 35.868333 73.435474 
 127.249222 35.868444 73.792268 
 127.249333 35.868444 73.267565 
 127.249333 35.868555 73.739308 
 127.249333 35.868667 73.977618 
 127.249444 35.868667 73.756319 
 127.249444 35.868778 74.157045 
 127.249444 35.868889 74.326343 
 127.249556 35.868889 74.304464 
 127.249556 35.869000 74.417982 
 127.249556 35.869111 74.483081 
 127.249556 35.869222 74.563493 
 127.249667 35.869222 74.657727 
 127.249667 35.869333 74.835500 
 127.249667 35.869444 74.934805 
 127.249778 35.869444 75.013526 
 127.249778 35.869555 75.047413 
 127.249778 35.869667 75.051443 
 127.249889 35.869667 75.205740 
 127.249889 35.869778 75.264843 
 127.249889 35.869889 75.313517 
 127.250000 35.869889 76.105735 
 127.250000 35.870000 76.140633 
 127.250000 35.870111 76.008352 
 127.250111 35.870111 76.401437 
 127.250111 35.870222 76.195583 
 127.250111 35.870333 75.918253 
 127.250111 35.870444 75.736447 
 127.250222 35.870444 75.892045 
 127.250222 35.870556 75.792206 
 127.250222 35.870667 75.793378 
 127.250333 35.870667 76.073312 
 127.250333 35.870778 76.201777 
 127.250333 35.870889 76.426276 
 127.250444 35.870889 76.763411 
 127.250444 35.871000 76.952010 
 127.250444 35.871111 77.082627 
 127.250556 35.871111 77.002088 
 127.250556 35.871222 77.141115 
 127.250556 35.871333 77.249912 
 127.250667 35.871333 77.301735 
 127.250667 35.871444 77.504443 
 127.250667 35.871556 77.810233 
 127.250778 35.871667 78.720242 
 127.250778 35.871778 79.077189 
 127.250778 35.871889 79.405622 
 127.250889 35.871889 79.421964 
 127.250889 35.872000 79.798746 
 127.250889 35.872111 80.627588 
 127.251000 35.872111 81.631690 
 127.251000 35.872222 84.628055 
 127.251000 35.872333 89.989416 
 127.251111 35.872333 97.539236 
 127.251111 35.872444 104.169566 
 127.251111 35.872556 107.595561 
 127.251222 35.872556 107.288560 
 127.251222 35.872667 108.810776 
 127.251222 35.872778 109.422662 
 127.251333 35.872778 109.222839 
 127.251333 35.872889 110.326859 
 127.251333 35.873000 110.281747 
 127.251333 35.873111 109.519339 
 127.251444 35.873111 118.661822 
 127.251444 35.873222 117.190567 
 127.251444 35.873333 116.744709 
 127.251556 35.873333 126.049095 
 127.251556 35.873444 125.899317 
 127.251556 35.873556 125.629089 
 127.251667 35.873556 127.581897 
 127.251667 35.873667 127.481198 
 127.251667 35.873778 127.500305 
 127.251778 35.873778 130.435191 
 127.251778 35.873889 130.987580 
 127.251778 35.874000 131.451674 
 127.251889 35.874000 131.999877 
 127.251889 35.874111 131.891465 
 127.251889 35.874222 131.505494 
 127.251889 35.874333 130.803567 
 127.252000 35.874333 124.617643 
 127.252000 35.874444 123.860231 
 127.252000 35.874556 124.627674 
 127.252111 35.874556 120.509589 
 127.252111 35.874667 120.013087 
 127.252111 35.874778 118.822484 
 127.252222 35.874778 114.423373 
 127.252222 35.874889 113.517504 
 127.252222 35.875000 113.363305 
 127.252333 35.875000 111.584587 
 127.252333 35.875111 112.261494 
 127.252333 35.875222 113.750558 
 127.252444 35.875222 111.871143 
 127.252444 35.875333 117.641560 
 127.252444 35.875444 124.438036 
 127.252444 35.875556 127.556303 
 127.252556 35.875556 128.527119 
 127.252556 35.875667 130.180100 
 127.252556 35.875778 131.033415 
 127.252667 35.875778 136.519673 
 127.252667 35.875889 137.553090 
 127.252667 35.876000 141.170643 
 127.252778 35.876000 146.059349 
 127.252778 35.876111 153.147699 
 127.252778 35.876222 158.424890 
 127.252889 35.876222 161.525092 
 127.252889 35.876333 162.501162 
 127.252889 35.876444 162.783820 
 127.253000 35.876444 162.462789 
 127.253000 35.876556 162.912346 
 127.253000 35.876667 163.748600 
 127.253111 35.876778 163.140644 
 127.253111 35.876889 163.678553 
 127.253111 35.877000 163.594598 
 127.253222 35.877000 158.931662 
 127.253222 35.877111 157.427145 
 127.253222 35.877222 154.062640 
 127.253333 35.877222 139.199193 
 127.253333 35.877333 136.712141 
 127.253333 35.877445 134.227960 
 127.253444 35.877445 134.384952 
 127.253444 35.877556 133.668837 
 127.253444 35.877667 133.023210 
 127.253556 35.877667 132.081861 
 127.253556 35.877778 135.223093 
 127.253556 35.877889 141.970363 
 127.253667 35.877889 134.616020 
 127.253667 35.878000 144.425625 
 127.253667 35.878111 149.178876 
 127.253667 35.878222 150.248127 
 127.253778 35.878222 145.803985 
 127.253778 35.878333 146.520024 
 127.253778 35.878445 145.463777 
 127.253889 35.878445 145.236453 
 127.253889 35.878556 144.224049 
 127.253889 35.878667 140.848245 
 127.254000 35.878667 140.243009 
 127.254000 35.878778 134.689263 
 127.254000 35.878889 125.978302 
 127.254111 35.878889 125.598756 
 127.254111 35.879000 119.156469 
 127.254111 35.879111 115.393550 
 127.254222 35.879111 113.943349 
 127.254222 35.879222 110.328879 
 127.254222 35.879333 109.009299 
 127.254222 35.879445 108.897918 
 127.254333 35.879445 107.398516 
 127.254333 35.879556 107.221816 
 127.254333 35.879667 107.161788 
 127.254444 35.879667 104.972998 
 127.254444 35.879778 104.736639 
 127.254444 35.879889 104.959298 
 127.254556 35.879889 102.269111 
 127.254556 35.880000 103.744500 
 127.254556 35.880111 104.650991 
 127.254667 35.880111 102.716683 
 127.254667 35.880222 104.422141 
 127.254667 35.880333 106.148575 
 127.254778 35.880333 104.990198 
 127.254778 35.880444 107.826230 
 127.254778 35.880555 109.643790 
 127.254778 35.880667 111.169326 
 127.254889 35.880667 108.782015 
 127.254889 35.880778 111.387775 
 127.254889 35.880889 116.491595 
 127.255000 35.880889 108.844628 
 127.255000 35.881000 116.004635 
 127.255000 35.881111 126.069386 
 127.255111 35.881111 109.182371 
 127.255111 35.881222 117.031612 
 127.255111 35.881333 125.630615 
 127.255222 35.881333 113.557714 
 127.255222 35.881444 120.385877 
 127.255222 35.881555 126.282751 
 127.255333 35.881555 113.216661 
 127.255333 35.881667 118.464278 
 127.255333 35.881778 124.155401 
 127.255333 35.881889 128.859348 
 127.255444 35.881889 117.975328 
 127.255444 35.882000 123.350444 
 127.255444 35.882111 126.580966 
 127.255556 35.882111 119.937591 
 127.255556 35.882222 123.283079 
 127.255556 35.882333 125.055953 
 127.255667 35.882333 121.313606 
 127.255667 35.882444 123.696746 
 127.255667 35.882556 125.024567 
 127.255778 35.882556 121.512712 
 127.255778 35.882667 123.474193 
 127.255778 35.882778 124.476448 
 127.255889 35.882778 123.080447 
 127.255889 35.882889 123.864145 
 127.255889 35.883000 123.752245 
 127.255889 35.883111 122.146667 
 127.256000 35.883111 119.853242 
 127.256000 35.883222 116.720799 
 127.256000 35.883333 113.897685 
 127.256111 35.883333 118.267041 
 127.256111 35.883444 117.077306 
 127.256111 35.883556 115.640771 
 127.256222 35.883556 119.049791 
 127.256222 35.883667 116.214120 
 127.256222 35.883778 113.078074 
 127.256333 35.883778 110.650177 
 127.256333 35.883889 109.677731 
 127.256333 35.884000 109.892161 
 127.256444 35.884000 109.096413 
 127.256444 35.884111 109.757651 
 127.256444 35.884222 111.336684 
 127.256444 35.884333 114.460239 
 127.256556 35.884333 112.998757 
 127.256556 35.884444 116.453475 
 127.256556 35.884556 119.266869 
 127.256667 35.884556 114.945291 
 127.256667 35.884667 117.545037 
 127.256667 35.884778 119.798368 
 127.256778 35.884778 113.570375 
 127.256778 35.884889 116.802237 
 127.256778 35.885000 121.287348 
 127.256889 35.885000 114.138305 
 127.256889 35.885111 118.087225 
 127.256889 35.885222 122.606285 
 127.257000 35.885222 114.482083 
 127.257000 35.885333 116.526673 
 127.257000 35.885444 118.735916 
 127.257000 35.885556 120.098556 
 127.257111 35.885556 116.121673 
 127.257111 35.885667 117.139769 
 127.257111 35.885778 117.740086 
 127.257222 35.885778 116.248922 
 127.257222 35.885889 116.538633 
 127.257222 35.886000 116.779338 
 127.257333 35.886000 116.183542 
 127.257333 35.886111 116.424102 
 127.257333 35.886222 116.819607 
 127.257444 35.886222 116.381175 
 127.257444 35.886333 116.999067 
 127.257444 35.886444 117.480048 
 127.257556 35.886444 117.116429 
 127.257556 35.886556 117.403840 
 127.257556 35.886667 117.524222 
 127.257556 35.886778 117.628474 
 127.257667 35.886778 117.192021 
 127.257667 35.886889 117.234109 
 127.257667 35.887000 117.312405 
 127.257778 35.887000 116.049189 
 127.257778 35.887111 116.129953 
 127.257778 35.887222 116.476899 
 127.257889 35.887222 115.927413 
 127.257889 35.887333 116.240575 
 127.257889 35.887444 116.839024 
 127.258000 35.887444 116.817686 
 127.258000 35.887556 117.272101 
 127.258000 35.887667 117.559757 
 127.258111 35.887667 117.455905 
 127.258111 35.887778 117.694655 
 127.258111 35.887889 118.123852 
 127.258222 35.887889 118.839549 
 127.258222 35.888000 119.706941 
 127.258222 35.888111 120.406812 
 127.258222 35.888222 120.840510 
 127.258333 35.888222 120.841030 
 127.258333 35.888333 121.266209 
 127.258333 35.888444 121.881010 
 127.258444 35.888444 123.383054 
 127.258444 35.888556 123.410739 
 127.258444 35.888667 123.352569 
 127.258556 35.888667 123.999507 
 127.258556 35.888778 123.578576 
 127.258556 35.888889 123.408619 
 127.258667 35.888889 125.313761 
 127.258667 35.889000 124.722765 
 127.258667 35.889111 124.335205 
 127.258778 35.889111 126.753574 
 127.258778 35.889222 124.876040 
 127.258778 35.889333 124.190261 
 127.258778 35.889444 124.703063 
 127.258889 35.889444 123.863380 
 127.258889 35.889556 124.490993 
 127.258889 35.889667 126.205704 
 127.259000 35.889667 127.710361 
 127.259000 35.889778 128.805127 
 127.259000 35.889889 129.679019 
 127.259111 35.889889 129.294289 
 127.259111 35.890000 129.939517 
 127.259111 35.890111 131.983393 
 127.259222 35.890111 129.707572 
 127.259222 35.890222 133.361326 
 127.259222 35.890333 137.565018 
 127.259333 35.890333 134.209968 
 127.259333 35.890445 135.295611 
 127.259333 35.890556 135.725743 
 127.259333 35.890667 136.227709 
 127.259444 35.890667 135.499910 
 127.259444 35.890778 136.544047 
 127.259444 35.890889 138.763662 
 127.259556 35.890889 140.425096 
 127.259556 35.891000 143.063036 
 127.259556 35.891111 144.685916 
 127.259667 35.891111 145.922097 
 127.259667 35.891222 148.846944 
 127.259667 35.891333 152.118135 
 127.259778 35.891333 157.808078 
 127.259778 35.891445 162.135022 
 127.259778 35.891556 164.395792 
 127.259889 35.891556 164.363649 
 127.259889 35.891667 167.191735 
 127.259889 35.891778 169.772053 
 127.259889 35.891889 173.273382 
 127.260000 35.891889 185.806308 
 127.260000 35.892000 189.126305 
 127.260000 35.892111 193.315014 
 127.260111 35.892111 195.709565 
 127.260111 35.892222 202.329959 
 127.260111 35.892333 212.042077 
 127.260222 35.892333 206.292347 
 127.260222 35.892444 211.456822 
 127.260222 35.892555 216.057211 
 127.260333 35.892555 206.806059 
 127.260333 35.892667 210.440119 
 127.260333 35.892778 220.176673 
 127.260444 35.892778 218.404758 
 127.260444 35.892889 240.318497 
 127.260444 35.893000 262.588676 
 127.260444 35.893111 271.746957 
 127.260556 35.893111 272.803322 
 127.260556 35.893222 275.923329 
 127.260556 35.893333 276.284659 
 127.260667 35.893333 273.744732 
 127.260667 35.893444 276.183113 
 127.260667 35.893555 278.023807 
 127.260778 35.893555 288.367754 
 127.260778 35.893667 296.769453 
 127.260778 35.893778 299.762431 
 127.260889 35.893778 303.386169 
 127.260889 35.893889 304.500747 
 127.260889 35.894000 304.429158 
 127.261000 35.894000 306.692854 
 127.261000 35.894111 309.175342 
 127.261000 35.894222 311.255732 
 127.261000 35.894333 311.051945 
 127.261111 35.894333 316.748770 
 127.261111 35.894444 316.767090 
 127.261111 35.894555 316.132394 
 127.261222 35.894555 317.829432 
 127.261222 35.894667 317.289416 
 127.261222 35.894778 315.422069 
 127.261333 35.894778 329.374744 
 127.261333 35.894889 324.566393 
 127.261333 35.895000 320.896380 
 127.261444 35.895000 342.108066 
 127.261444 35.895111 341.988299 
 127.261444 35.895222 341.229242 
 127.261556 35.895222 344.237436 
 127.261556 35.895333 342.342429 
 127.261556 35.895444 338.867993 
 127.261556 35.895556 336.079153 
 127.261667 35.895556 341.601323 
 127.261667 35.895667 341.573495 
 127.261667 35.895778 345.248329 
 127.261778 35.895778 366.214412 
 127.261778 35.895889 370.998589 
 127.261778 35.896000 374.517007 
 127.261889 35.896000 385.260979 
 127.261889 35.896111 384.465472 
 127.261889 35.896222 383.740618 
 127.262000 35.896222 396.205093 
 127.262000 35.896333 396.404773 
 127.262000 35.896444 399.823659 
 127.262111 35.896444 408.683862 
 127.262111 35.896556 415.366211 
 127.262111 35.896667 428.685845 
 127.262222 35.896778 447.432079 
 127.262222 35.896889 455.266310 
 127.262222 35.897000 460.599154 
 127.262333 35.897000 457.296461 
 127.262333 35.897111 459.084955 
 127.262333 35.897222 463.012315 
 127.262444 35.897222 461.023377 
 127.262444 35.897333 468.027970 
 127.262444 35.897444 480.403099 
 127.262556 35.897444 484.160104 
 127.262556 35.897556 486.518798 
 127.262556 35.897667 486.128875 
 127.262667 35.897667 486.078197 
 127.262667 35.897778 483.904611 
 127.262667 35.897889 475.752500 
 127.262778 35.897889 471.949172 
 127.262778 35.898000 454.970568 
 127.262778 35.898111 444.763974 
 127.262778 35.898222 442.342460 
 127.262889 35.898222 445.491176 
 127.262889 35.898333 444.066493 
 127.262889 35.898444 444.205163 
 127.263000 35.898444 447.569042 
 127.263000 35.898556 446.204950 
 127.263000 35.898667 446.454242 
 127.263111 35.898667 444.240463 
 127.263111 35.898778 445.285161 
 127.263111 35.898889 447.011212 
 127.263222 35.898889 441.689961 
 127.263222 35.899000 445.256058 
 127.263222 35.899111 451.151926 
 127.263333 35.899111 436.902901 
 127.263333 35.899222 445.679203 
 127.263333 35.899333 458.688476 
 127.263333 35.899444 469.351278 
 127.263444 35.899444 447.947179 
 127.263444 35.899556 462.906954 
 127.263444 35.899667 474.095006 
 127.263556 35.899667 448.472217 
 127.263556 35.899778 463.650447 
 127.263556 35.899889 476.435869 
 127.263667 35.899889 462.515299 
 127.263667 35.900000 473.381356 
 127.263667 35.900111 479.819327 
 127.263778 35.900111 472.764529 
 127.263778 35.900222 475.647652 
 127.263778 35.900333 476.968122 
 127.263889 35.900333 474.780570 
 127.263889 35.900444 474.874890 
 127.263889 35.900556 473.040407 
 127.263889 35.900667 468.833394 
 127.264000 35.900667 465.708597 
 127.264000 35.900778 464.956112 
 127.264000 35.900889 464.651808 
 127.264111 35.900889 464.872837 
 127.264111 35.901000 465.774873 
 127.264111 35.901111 465.777044 
 127.264222 35.901111 465.561115 
 127.264222 35.901222 463.695475 
 127.264222 35.901333 460.159779 
 127.264333 35.901333 440.074322 
 127.264333 35.901444 437.132786 
 127.264333 35.901556 434.303627 
 127.264444 35.901556 432.944399 
 127.264444 35.901667 425.081564 
 127.264444 35.901778 408.836708 
 127.264444 35.901889 396.100887 
 127.264556 35.901889 389.128921 
 127.264556 35.902000 385.811212 
 127.264556 35.902111 382.792942 
 127.264667 35.902111 371.878778 
 127.264667 35.902222 370.413359 
 127.264667 35.902333 369.907914 
 127.264778 35.902333 366.107356 
 127.264778 35.902445 362.854500 
 127.264778 35.902556 359.408726 
 127.264889 35.902556 351.998076 
 127.264889 35.902667 350.167794 
 127.264889 35.902778 348.934056 
 127.265000 35.902778 346.211733 
 127.265000 35.902889 345.337653 
 127.265000 35.903000 342.745731 
 127.265000 35.903111 336.968674 
 127.265111 35.903111 331.785017 
 127.265111 35.903222 324.424867 
 127.265111 35.903333 313.026000 
 127.265222 35.903333 304.926849 
 127.265222 35.903445 299.168628 
 127.265222 35.903556 296.225593 
 127.265333 35.903556 299.155097 
 127.265333 35.903667 297.295595 
 127.265333 35.903778 296.145131 
 127.265444 35.903778 296.228853 
 127.265444 35.903889 292.500142 
 127.265444 35.904000 285.690200 
 127.265556 35.904000 275.397570 
 127.265556 35.904111 265.498301 
 127.265556 35.904222 260.507346 
 127.265556 35.904333 258.534526 
 127.265667 35.904333 258.477763 
 127.265667 35.904445 255.708356 
 127.265667 35.904556 252.385667 
 127.265778 35.904556 247.521762 
 127.265778 35.904667 244.071254 
 127.265778 35.904778 242.700734 
 127.265889 35.904778 242.229316 
 127.265889 35.904889 240.577085 
 127.265889 35.905000 237.904589 
 127.266000 35.905000 231.842618 
 127.266000 35.905111 227.465543 
 127.266000 35.905222 225.146866 
 127.266111 35.905222 224.857856 
 127.266111 35.905333 224.456223 
 127.266111 35.905444 224.130321 
 127.266111 35.905555 223.530077 
 127.266222 35.905555 223.990643 
 127.266222 35.905667 223.752648 
 127.266222 35.905778 223.794600 
 127.266333 35.905778 224.919662 
 127.266333 35.905889 227.554038 
 127.266333 35.906000 231.371115 
 127.266444 35.906000 231.304937 
 127.266444 35.906111 235.408735 
 127.266444 35.906222 238.783542 
 127.266556 35.906222 247.360828 
 127.266556 35.906333 253.601304 
 127.266556 35.906444 258.046319 
 127.266667 35.906444 263.155340 
 127.266667 35.906555 265.550141 
 127.266667 35.906667 266.178222 
 127.266667 35.906778 265.820024 
 127.266778 35.906778 267.497816 
 127.266778 35.906889 267.772355 
 127.266778 35.907000 268.115450 
 127.266889 35.907000 274.552591 
 127.266889 35.907111 273.435940 
 127.266889 35.907222 272.382703 
 127.267000 35.907222 281.247354 
 127.267000 35.907333 277.510609 
 127.267000 35.907444 275.827133 
 127.267111 35.907444 285.351348 
 127.267111 35.907555 283.772371 
 127.267111 35.907667 283.831648 
 127.267222 35.907667 286.763541 
 127.267222 35.907778 289.689116 
 127.267222 35.907889 296.279787 
 127.267222 35.908000 303.389739 
 127.267333 35.908000 309.377515 
 127.267333 35.908111 312.305097 
 127.267333 35.908222 312.711293 
 127.267444 35.908222 314.342460 
 127.267444 35.908333 313.838333 
 127.267444 35.908444 312.697617 
 127.267556 35.908444 318.114074 
 127.267556 35.908556 317.001217 
 127.267556 35.908667 316.851006 
 127.267667 35.908667 334.534959 
 127.267667 35.908778 336.444137 
 127.267667 35.908889 337.811334 
 127.267778 35.909000 344.964985 
 127.267778 35.909111 344.227526 
 127.267778 35.909222 342.369245 
 127.267889 35.909222 349.512505 
 127.267889 35.909333 348.161377 
 127.267889 35.909444 343.990275 
 127.268000 35.909444 360.809473 
 127.268000 35.909556 354.891436 
 127.268000 35.909667 344.742991 
 127.268111 35.909667 362.169347 
 127.268111 35.909778 351.673274 
 127.268111 35.909889 333.153223 
 127.268222 35.909889 360.041667 
 127.268222 35.910000 349.337192 
 127.268222 35.910111 331.404778 
 127.268222 35.910222 310.287198 
 127.268333 35.910222 342.962320 
 127.268333 35.910333 318.891905 
 127.268333 35.910444 298.740643 
 127.268444 35.910444 316.639510 
 127.268444 35.910556 306.287667 
 127.268444 35.910667 301.956708 
 127.268556 35.910667 310.436212 
 127.268556 35.910778 307.678472 
 127.268556 35.910889 306.425407 
 127.268667 35.910889 312.043082 
 127.268667 35.911000 310.438154 
 127.268667 35.911111 308.787664 
 127.268778 35.911111 316.695311 
 127.268778 35.911222 311.872882 
 127.268778 35.911333 305.645596 
 127.268778 35.911444 301.159340 
 127.268889 35.911444 307.866582 
 127.268889 35.911556 304.930852 
 127.268889 35.911667 302.987249 
 127.269000 35.911667 307.822211 
 127.269000 35.911778 304.054879 
 127.269000 35.911889 300.700032 
 127.269111 35.911889 301.737816 
 127.269111 35.912000 300.120215 
 127.269111 35.912111 297.367628 
 127.269222 35.912111 300.447211 
 127.269222 35.912222 294.708926 
 127.269222 35.912333 284.746950 
 127.269333 35.912333 283.955518 
 127.269333 35.912444 280.438410 
 127.269333 35.912556 278.805760 
 127.269333 35.912667 276.947217 
 127.269444 35.912667 276.410914 
 127.269444 35.912778 273.662432 
 127.269444 35.912889 272.473171 
 127.269556 35.912889 273.445269 
 127.269556 35.913000 273.218571 
 127.269556 35.913111 274.841155 
 127.269667 35.913111 278.232759 
 127.269667 35.913222 281.639685 
 127.269667 35.913333 287.297114 
 127.269778 35.913333 300.706238 
 127.269778 35.913444 298.602506 
 127.269778 35.913556 295.494199 
 127.269889 35.913556 301.515374 
 127.269889 35.913667 296.689123 
 127.269889 35.913778 294.281251 
 127.269889 35.913889 292.465685 
 127.270000 35.913889 293.641154 
 127.270000 35.914000 288.400549 
 127.270000 35.914111 281.126819 
 127.270111 35.914111 276.584762 
 127.270111 35.914222 270.956084 
 127.270111 35.914333 268.100620 
 127.270222 35.914333 272.687590 
 127.270222 35.914444 269.304584 
 127.270222 35.914556 267.060354 
 127.270333 35.914556 271.630239 
 127.270333 35.914667 267.962072 
 127.270333 35.914778 266.272896 
 127.270333 35.914889 265.112883 
 127.270444 35.914889 267.022200 
 127.270444 35.915000 266.078410 
 127.270444 35.915111 264.518069 
 127.270556 35.915111 266.017788 
 127.270556 35.915222 262.099947 
 127.270556 35.915333 259.507094 
 127.270667 35.915333 260.605962 
 127.270667 35.915445 259.298850 
 127.270667 35.915556 258.555515 
 127.270778 35.915556 260.045213 
 127.270778 35.915667 259.445408 
 127.270778 35.915778 257.565885 
 127.270889 35.915778 262.207847 
 127.270889 35.915889 260.161605 
 127.270889 35.916000 258.110970 
 127.270889 35.916111 256.945495 
 127.271000 35.916111 258.886415 
 127.271000 35.916222 258.035270 
 127.271000 35.916333 257.414975 
 127.271111 35.916333 259.509388 
 127.271111 35.916445 257.997243 
 127.271111 35.916556 254.997764 
 127.271222 35.916556 269.361084 
 127.271222 35.916667 260.938273 
 127.271222 35.916778 251.595280 
 127.271333 35.916778 276.687697 
 127.271333 35.916889 264.409819 
 127.271333 35.917000 255.064320 
 127.271333 35.917111 250.698976 
 127.271444 35.917111 273.637091 
 127.271444 35.917222 268.846200 
 127.271444 35.917333 266.060314 
 127.271556 35.917333 279.858285 
 127.271556 35.917444 276.698433 
 127.271556 35.917556 275.330630 
 127.271667 35.917556 276.448218 
 127.271667 35.917667 279.604045 
 127.271667 35.917778 287.529031 
 127.271778 35.917778 280.097673 
 127.271778 35.917889 288.697536 
 127.271778 35.918000 297.647350 
 127.271889 35.918000 300.953422 
 127.271889 35.918111 304.592581 
 127.271889 35.918222 303.098770 
 127.271889 35.918333 296.228139 
 127.272000 35.918333 302.847139 
 127.272000 35.918444 292.110549 
 127.272000 35.918555 285.223924 
 127.272111 35.918555 292.295715 
 127.272111 35.918667 285.603419 
 127.272111 35.918778 281.961431 
 127.272222 35.918778 288.269884 
 127.272222 35.918889 282.415180 
 127.272222 35.919000 277.250880 
 127.272333 35.919000 280.288434 
 127.272333 35.919111 276.555934 
 127.272333 35.919222 271.689984 
 127.272333 35.919333 266.128033 
 127.272444 35.919333 276.083141 
 127.272444 35.919444 272.442744 
 127.272444 35.919555 269.270789 
 127.272556 35.919555 282.650871 
 127.272556 35.919667 279.504083 
 127.272556 35.919778 277.286887 
 127.272667 35.919778 285.217284 
 127.272667 35.919889 282.782327 
 127.272667 35.920000 280.583691 
 127.272778 35.920000 283.909887 
 127.272778 35.920111 281.969835 
 127.272778 35.920222 279.131871 
 127.272889 35.920222 285.752163 
 127.272889 35.920333 282.469354 
 127.272889 35.920444 277.771122 
 127.272889 35.920556 272.695160 
 127.273000 35.920556 286.084823 
 127.273000 35.920667 278.649172 
 127.273000 35.920778 273.348053 
 127.273111 35.920778 284.910922 
 127.273111 35.920889 279.023913 
 127.273111 35.921000 274.262721 
 127.273222 35.921000 279.295217 
 127.273222 35.921111 275.704020 
 127.273222 35.921222 270.102684 
 127.273333 35.921222 274.542411 
 127.273333 35.921333 267.846907 
 127.273333 35.921444 256.374109 
 127.273333 35.921556 243.802772 
 127.273444 35.921556 239.525830 
 127.273444 35.921667 229.982564 
 127.273444 35.921778 225.669657 
 127.273556 35.921778 226.016891 
 127.273556 35.921889 224.196052 
 127.273556 35.922000 222.846000 
 127.273667 35.922000 223.447818 
 127.273667 35.922111 219.136474 
 127.273667 35.922222 212.417478 
 127.273778 35.922222 205.682632 
 127.273778 35.922333 197.692102 
 127.273778 35.922444 192.305826 
 127.273889 35.922556 190.881663 
 127.273889 35.922667 188.475348 
 127.273889 35.922778 186.719052 
 127.274000 35.922778 187.700194 
 127.274000 35.922889 184.600028 
 127.274000 35.923000 179.872033 
 127.274111 35.923000 181.311366 
 127.274111 35.923111 174.438315 
 127.274111 35.923222 168.632982 
 127.274222 35.923222 170.508368 
 127.274222 35.923333 167.146733 
 127.274222 35.923444 165.218882 
 127.274333 35.923444 167.317719 
 127.274333 35.923556 165.478695 
 127.274333 35.923667 163.761509 
 127.274333 35.923778 162.441532 
 127.274444 35.923778 161.635162 
 127.274444 35.923889 160.927333 
 127.274444 35.924000 160.620063 
 127.274556 35.924000 160.667722 
 127.274556 35.924111 160.553044 
 127.274556 35.924222 160.461685 
 127.274667 35.924222 160.484903 
 127.274667 35.924333 160.354263 
 127.274667 35.924444 160.169045 
 127.274778 35.924444 160.029628 
 127.274778 35.924556 159.953806 
 127.274778 35.924667 160.049955 
 127.274778 35.924778 160.386729 
 127.274889 35.924778 160.578621 
 127.274889 35.924889 161.205814 
 127.274889 35.925000 162.225959 
 127.275000 35.925000 164.653774 
 127.275000 35.925111 167.138039 
 127.275000 35.925222 171.508455 
 127.275111 35.925222 176.484486 
 127.275111 35.925333 183.282293 
 127.275111 35.925444 189.332875 
 127.275222 35.925444 193.411873 
 127.275222 35.925556 196.761884 
 127.275222 35.925667 199.865344 
 127.275333 35.925778 212.700160 
 127.275333 35.925889 218.217603 
 127.275333 35.926000 221.178855 
 127.275444 35.926000 222.506222 
 127.275444 35.926111 223.574838 
 127.275444 35.926222 224.977297 
 127.275556 35.926222 227.120653 
 127.275556 35.926333 229.707266 
 127.275556 35.926444 235.499429 
 127.275667 35.926444 241.328098 
 127.275667 35.926556 249.371175 
 127.275667 35.926667 264.282096 
 127.275778 35.926667 275.380861 
 127.275778 35.926778 294.886091 
 127.275778 35.926889 307.051190 
 127.275778 35.927000 311.561318 
 127.275889 35.927000 310.959722 
 127.275889 35.927111 313.699066 
 127.275889 35.927222 314.610424 
 127.276000 35.927222 316.515086 
 127.276000 35.927333 318.659251 
 127.276000 35.927445 320.715876 
 127.276111 35.927445 335.971270 
 127.276111 35.927556 337.617888 
 127.276111 35.927667 337.346626 
 127.276222 35.927667 342.489501 
 127.276222 35.927778 341.599578 
 127.276222 35.927889 339.801152 
 127.276222 35.928000 338.324069 
 127.276333 35.928000 345.146329 
 127.276333 35.928111 343.215325 
 127.276333 35.928222 341.048411 
 127.276444 35.928222 349.040557 
 127.276444 35.928333 344.106203 
 127.276444 35.928445 338.453788 
 127.276556 35.928445 341.785184 
 127.276556 35.928556 338.255955 
 127.276556 35.928667 336.076468 
 127.276667 35.928667 341.930115 
 127.276667 35.928778 337.898161 
 127.276667 35.928889 332.255256 
 127.276778 35.928889 335.052453 
 127.276778 35.929000 329.873948 
 127.276778 35.929111 327.399265 
 127.276778 35.929222 325.493634 
 127.276889 35.929222 329.609212 
 127.276889 35.929333 327.443665 
 127.276889 35.929445 323.499258 
 127.277000 35.929445 328.107507 
 127.277000 35.929556 321.751417 
 127.277000 35.929667 312.075601 
 127.277111 35.929667 320.509541 
 127.277111 35.929778 313.654967 
 127.277111 35.929889 302.471415 
 127.277222 35.929889 314.607832 
 127.277222 35.930000 302.964086 
 127.277222 35.930111 285.208889 
 127.277222 35.930222 271.391348 
 127.277333 35.930222 275.039712 
 127.277333 35.930333 267.158453 
 127.277333 35.930444 264.996706 
 127.277444 35.930444 266.440613 
 127.277444 35.930555 265.661431 
 127.277444 35.930667 266.502335 
 127.277556 35.930667 269.652745 
 127.277556 35.930778 269.573731 
 127.277556 35.930889 272.263340 
 127.277667 35.930889 273.628405 
 127.277667 35.931000 276.933411 
 127.277667 35.931111 285.905779 
 127.277778 35.931111 277.709886 
 127.277778 35.931222 285.655678 
 127.277778 35.931333 296.690728 
 127.277778 35.931444 307.276277 
 127.277889 35.931444 295.775115 
 127.277889 35.931555 305.178379 
 127.277889 35.931667 318.235913 
 127.278000 35.931667 309.979026 
 127.278000 35.931778 324.362465 
 127.278000 35.931889 341.532409 
 127.278111 35.931889 332.763015 
 127.278111 35.932000 346.079360 
 127.278111 35.932111 361.513078 
 127.278222 35.932111 352.337349 
 127.278222 35.932222 370.846414 
 127.278222 35.932333 387.209173 
 127.278222 35.932444 396.174064 
 127.278333 35.932444 390.220753 
 127.278333 35.932555 399.077197 
 127.278333 35.932667 403.970760 
 127.278444 35.932667 406.943177 
 127.278444 35.932778 412.859422 
 127.278444 35.932889 415.847774 
 127.278556 35.932889 419.200393 
 127.278556 35.933000 420.247378 
 127.278556 35.933111 420.940714 
 127.278667 35.933111 423.042370 
 127.278667 35.933222 426.477647 
 127.278667 35.933333 431.273502 
 127.278778 35.933333 436.024511 
 127.278778 35.933444 439.269668 
 127.278778 35.933556 440.336504 
 127.278778 35.933667 440.619508 
 127.278889 35.933667 445.664279 
 127.278889 35.933778 445.428902 
 127.278889 35.933889 447.371122 
 127.279000 35.933889 462.281791 
 127.279000 35.934000 465.018287 
 127.279000 35.934111 468.403077 
 127.279111 35.934111 466.917599 
 127.279111 35.934222 468.022694 
 127.279111 35.934333 469.605340 
 127.279222 35.934333 468.929912 
 127.279222 35.934444 468.666894 
 127.279222 35.934556 467.016783 
 127.279333 35.934556 468.511201 
 127.279333 35.934667 465.833129 
 127.279333 35.934778 457.484156 
 127.279333 35.934889 438.696615 
 127.279444 35.934889 425.657033 
 127.279444 35.935000 414.169373 
 127.279444 35.935111 404.858296 
 127.279556 35.935111 409.842912 
 127.279556 35.935222 401.400862 
 127.279556 35.935333 391.060261 
 127.279667 35.935333 383.683506 
 127.279667 35.935444 375.643286 
 127.279667 35.935556 372.475000 
 127.279778 35.935556 376.784853 
 127.279778 35.935667 373.409116 
 127.279778 35.935778 371.304927 
 127.279889 35.935889 376.967207 
 127.279889 35.936000 375.611372 
 127.279889 35.936111 374.956534 
 127.280000 35.936111 377.630164 
 127.280000 35.936222 376.712005 
 127.280000 35.936333 374.787927 
 127.280111 35.936333 381.119172 
 127.280111 35.936444 373.752484 
 127.280111 35.936556 368.190974 
 127.280222 35.936556 376.116626 
 127.280222 35.936667 373.701940 
 127.280222 35.936778 372.196531 
 127.280333 35.936778 375.320523 
 127.280333 35.936889 372.667269 
 127.280333 35.937000 365.121226 
 127.280444 35.937111 353.023731 
 127.280444 35.937222 347.882194 
 127.280444 35.937333 345.703503 
 127.280556 35.937333 347.562304 
 127.280556 35.937444 345.905756 
 127.280556 35.937556 342.487488 
 127.280667 35.937556 347.300789 
 127.280667 35.937667 341.304815 
 127.280667 35.937778 326.864449 
 127.280778 35.937778 329.988597 
 127.280778 35.937889 306.750606 
 127.280778 35.938000 286.178968 
 127.280889 35.938000 300.375297 
 127.280889 35.938111 290.550168 
 127.280889 35.938222 283.042885 
 127.281000 35.938333 295.585766 
 127.281000 35.938444 292.075962 
 127.281000 35.938556 289.791237 
 127.281111 35.938556 299.240250 
 127.281111 35.938667 296.961880 
 127.281111 35.938778 294.778410 
 127.281222 35.938778 305.756778 
 127.281222 35.938889 303.565123 
 127.281222 35.939000 300.257251 
 127.281333 35.939000 318.321647 
 127.281333 35.939111 311.998993 
 127.281333 35.939222 304.155807 
 127.281444 35.939222 320.585914 
 127.281444 35.939333 309.369286 
 127.281444 35.939444 294.589560 
 127.281556 35.939444 303.230838 
 127.281556 35.939556 290.141113 
 127.281556 35.939667 276.662813 
 127.281556 35.939778 267.752530 
 127.281667 35.939778 274.319962 
 127.281667 35.939889 265.419968 
 127.281667 35.940000 261.492512 
 127.281778 35.940000 269.374503 
 127.281778 35.940111 267.720373 
 127.281778 35.940222 268.804239 
 127.281889 35.940222 279.327611 
 127.281889 35.940333 280.485414 
 127.281889 35.940445 281.474677 
 127.282000 35.940445 284.035408 
 127.282000 35.940556 284.010404 
 127.282000 35.940667 284.032902 
 127.282111 35.940667 288.880613 
 127.282111 35.940778 290.356466 
 127.282111 35.940889 292.972257 
 127.282111 35.941000 296.322646 
 127.282222 35.941000 308.996869 
 127.282222 35.941111 309.020792 
 127.282222 35.941222 307.911256 
 127.282333 35.941222 313.988997 
 127.282333 35.941333 314.397569 
 127.282333 35.941445 316.238451 
 127.282444 35.941445 324.096554 
 127.282444 35.941556 326.625397 
 127.282444 35.941667 327.634547 
 127.282556 35.941667 329.928976 
 127.282556 35.941778 329.500946 
 127.282556 35.941889 329.574256 
 127.282667 35.941889 332.626226 
 127.282667 35.942000 333.835576 
 127.282667 35.942111 337.533210 
 127.282667 35.942222 343.728536 
 127.282778 35.942222 356.753302 
 127.282778 35.942333 359.811304 
 127.282778 35.942444 361.628761 
 127.282889 35.942444 363.837010 
 127.282889 35.942556 365.061682 
 127.282889 35.942667 367.800069 
 127.283000 35.942667 369.982229 
 127.283000 35.942778 374.787502 
 127.283000 35.942889 381.881243 
 127.283111 35.942889 390.877768 
 127.283111 35.943000 397.485017 
 127.283111 35.943111 401.992446 
 127.283222 35.943111 405.687862 
 127.283222 35.943222 407.132052 
 127.283222 35.943333 407.437881 
 127.283333 35.943333 408.095491 
 127.283333 35.943444 406.557343 
 127.283333 35.943555 403.879404 
 127.283333 35.943667 398.908384 
 127.283444 35.943667 392.931479 
 127.283444 35.943778 384.196139 
 127.283444 35.943889 377.049831 
 127.283556 35.943889 375.542649 
 127.283556 35.944000 370.543900 
 127.283556 35.944111 367.764451 
 127.283667 35.944111 360.480222 
 127.283667 35.944222 357.587122 
 127.283667 35.944333 354.581656 
 127.283778 35.944333 345.049463 
 127.283778 35.944444 339.622949 
 127.283778 35.944555 336.865250 
 127.283889 35.944555 330.653388 
 127.283889 35.944667 329.609091 
 127.283889 35.944778 329.633156 
 127.283889 35.944889 330.388954 
 127.284000 35.944889 326.855699 
 127.284000 35.945000 325.679464 
 127.284000 35.945111 324.056798 
 127.284111 35.945111 318.135553 
 127.284111 35.945222 316.827477 
 127.284111 35.945333 316.251738 
 127.284222 35.945333 314.410973 
 127.284222 35.945444 314.601117 
 127.284222 35.945556 314.716159 
 127.284333 35.945556 307.338947 
 127.284333 35.945667 303.285095 
 127.284333 35.945778 300.594534 
 127.284444 35.945778 291.423883 
 127.284444 35.945889 291.068006 
 127.284444 35.946000 291.543418 
 127.284556 35.946000 285.216578 
 127.284556 35.946111 288.056598 
 127.284556 35.946222 290.703400 
 127.284556 35.946333 294.514645 
 127.284667 35.946333 281.314923 
 127.284667 35.946444 286.701347 
 127.284667 35.946556 294.481607 
 127.284778 35.946556 285.595123 
 127.284778 35.946667 293.898022 
 127.284778 35.946778 299.418886 
 127.284889 35.946778 295.762078 
 127.284889 35.946889 299.651249 
 127.284889 35.947000 301.142746 
 127.285000 35.947000 289.827754 
 127.285000 35.947111 287.720465 
 127.285000 35.947222 286.103906 
 127.285111 35.947222 281.024256 
 127.285111 35.947333 279.698494 
 127.285111 35.947444 280.159802 
 127.285222 35.947444 278.247109 
 127.285222 35.947556 281.488042 
 127.285222 35.947667 288.124217 
 127.285222 35.947778 298.821732 
 127.285333 35.947778 301.885212 
 127.285333 35.947889 311.874132 
 127.285333 35.948000 317.213902 
 127.285444 35.948000 309.823720 
 127.285444 35.948111 315.725769 
 127.285444 35.948222 318.272385 
 127.285556 35.948222 308.582368 
 127.285556 35.948333 311.861157 
 127.285556 35.948444 312.937662 
 127.285667 35.948444 292.619890 
 127.285667 35.948556 287.597909 
 127.285667 35.948667 283.625250 
 127.285778 35.948667 272.631783 
 127.285778 35.948778 271.081203 
 127.285778 35.948889 270.896982 
 127.285778 35.949000 271.476778 
 127.285889 35.949000 269.368913 
 127.285889 35.949111 269.458029 
 127.285889 35.949222 269.596646 
 127.286000 35.949222 264.672233 
 127.286000 35.949333 263.554750 
 127.286000 35.949444 262.976728 
 127.286111 35.949444 256.187164 
 127.286111 35.949556 255.880514 
 127.286111 35.949667 255.037212 
 127.286222 35.949667 252.032411 
 127.286222 35.949778 248.759147 
 127.286222 35.949889 244.356826 
 127.286333 35.949889 241.595207 
 127.286333 35.950000 239.490413 
 127.286333 35.950111 238.169876 
 127.286444 35.950111 236.967435 
 127.286444 35.950222 236.003187 
 127.286444 35.950333 232.926151 
 127.286444 35.950444 225.500538 
 127.286556 35.950444 220.110439 
 127.286556 35.950556 208.385538 
 127.286556 35.950667 198.446616 
 127.286667 35.950667 201.267001 
 127.286667 35.950778 195.472163 
 127.286667 35.950889 189.101045 
 127.286778 35.950889 192.943180 
 127.286778 35.951000 182.945159 
 127.286778 35.951111 175.802509 
 127.286889 35.951111 177.518084 
 127.286889 35.951222 174.269149 
 127.286889 35.951333 172.670087 
 127.287000 35.951333 173.287796 
 127.287000 35.951444 169.240185 
 127.287000 35.951556 162.853144 
 127.287111 35.951556 154.292774 
 127.287111 35.951667 146.868359 
 127.287111 35.951778 143.233969 
 127.287111 35.951889 141.731516 
 127.287222 35.951889 143.451053 
 127.287222 35.952000 141.772227 
 127.287222 35.952111 140.918484 
 127.287333 35.952111 141.584100 
 127.287333 35.952222 139.795535 
 127.287333 35.952333 139.045069 
 127.287444 35.952333 139.107998 
 127.287444 35.952445 138.542282 
 127.287444 35.952556 138.420064 
 127.287556 35.952556 138.516137 
 127.287556 35.952667 138.437160 
 127.287556 35.952778 138.607877 
 127.287667 35.952778 139.315335 
 127.287667 35.952889 139.578856 
 127.287667 35.953000 139.850472 
 127.287778 35.953000 140.094450 
 127.287778 35.953111 140.113875 
 127.287778 35.953222 140.110738 
 127.287778 35.953333 140.079643 
 127.287889 35.953333 140.102447 
 127.287889 35.953445 140.051889 
 127.287889 35.953556 139.960048 
 127.288000 35.953556 140.050998 
 127.288000 35.953667 140.039161 
 127.288000 35.953778 140.125994 
 127.288111 35.953778 140.141474 
 127.288111 35.953889 140.444145 
 127.288111 35.954000 140.869305 
 127.288222 35.954000 140.352027 
 127.288222 35.954111 141.101681 
 127.288222 35.954222 142.136888 
 127.288333 35.954222 141.039044 
 127.288333 35.954333 141.899707 
 127.288333 35.954445 142.821488 
 127.288444 35.954445 140.923305 
 127.288444 35.954556 141.556292 
 127.288444 35.954667 143.029685 
 127.288444 35.954778 146.454356 
 127.288556 35.954778 144.547614 
 127.288556 35.954889 150.796501 
 127.288556 35.955000 159.026343 
 127.288667 35.955000 157.373639 
 127.288667 35.955111 164.029726 
 127.288667 35.955222 167.873790 
 127.288778 35.955222 166.869960 
 127.288778 35.955333 171.240919 
 127.288778 35.955444 174.225054 
 127.288889 35.955444 173.407412 
 127.288889 35.955555 175.368249 
 127.288889 35.955667 177.369515 
 127.289000 35.955667 174.100300 
 127.289000 35.955778 177.172369 
 127.289000 35.955889 182.974186 
 127.289111 35.955889 183.068964 
 127.289111 35.956000 190.159491 
 127.289111 35.956111 194.994796 
 127.289111 35.956222 198.868666 
 127.289222 35.956222 194.718810 
 127.289222 35.956333 198.380129 
 127.289222 35.956444 205.619063 
 127.289333 35.956444 197.581442 
 127.289333 35.956555 211.211028 
 127.289333 35.956667 228.736549 
 127.289444 35.956667 223.605033 
 127.289444 35.956778 237.613082 
 127.289444 35.956889 243.887058 
 127.289556 35.956889 235.753620 
 127.289556 35.957000 240.710245 
 127.289556 35.957111 244.320264 
 127.289667 35.957111 231.938403 
 127.289667 35.957222 238.399148 
 127.289667 35.957333 244.794034 
 127.289778 35.957444 233.254228 
 127.289778 35.957555 243.970561 
 127.289778 35.957667 251.329044 
 127.289889 35.957667 234.706353 
 127.289889 35.957778 244.758705 
 127.289889 35.957889 250.057632 
 127.290000 35.957889 231.586154 
 127.290000 35.958000 236.409588 
 127.290000 35.958111 239.137976 
 127.290111 35.958111 228.499327 
 127.290111 35.958222 230.786712 
 127.290111 35.958333 232.381948 
 127.290222 35.958333 229.093861 
 127.290222 35.958444 229.884996 
 127.290222 35.958556 230.569914 
 127.290333 35.958556 227.176775 
 127.290333 35.958667 228.348712 
 127.290333 35.958778 229.743472 
 127.290444 35.958889 224.328589 
 127.290444 35.959000 225.107590 
 127.290444 35.959111 225.687669 
 127.290556 35.959111 222.632259 
 127.290556 35.959222 223.529811 
 127.290556 35.959333 224.814090 
 127.290667 35.959333 222.473096 
 127.290667 35.959444 224.437199 
 127.290667 35.959556 227.324896 
 127.290778 35.959556 220.022806 
 127.290778 35.959667 222.996902 
 127.290778 35.959778 226.480659 
 127.290889 35.959778 221.886572 
 127.290889 35.959889 224.305747 
 127.290889 35.960000 227.454461 
 127.291000 35.960000 224.095654 
 127.291000 35.960111 226.924135 
 127.291000 35.960222 233.173296 
 127.291111 35.960333 248.691788 
 127.291111 35.960444 259.548498 
 127.291111 35.960556 264.607139 
 127.291222 35.960556 264.762178 
 127.291222 35.960667 266.429541 
 127.291222 35.960778 267.422577 
 127.291333 35.960778 267.656940 
 127.291333 35.960889 268.791823 
 127.291333 35.961000 272.702203 
 127.291444 35.961000 270.768543 
 127.291444 35.961111 276.333952 
 127.291444 35.961222 280.016013 
 127.291556 35.961222 276.340300 
 127.291556 35.961333 277.992482 
 127.291556 35.961444 278.953657 
 127.291667 35.961444 277.112704 
 127.291667 35.961556 278.571215 
 127.291667 35.961667 282.131334 
 127.291778 35.961778 292.249580 
 127.291778 35.961889 296.720056 
 127.291778 35.962000 301.067978 
 127.291889 35.962000 297.043892 
 127.291889 35.962111 300.091991 
 127.291889 35.962222 306.587238 
 127.292000 35.962222 305.635450 
 127.292000 35.962333 318.032711 
 127.292000 35.962444 338.052187 
 127.292111 35.962444 330.251898 
 127.292111 35.962556 345.253663 
 127.292111 35.962667 357.392208 
 127.292222 35.962667 341.368576 
 127.292222 35.962778 348.941314 
 127.292222 35.962889 357.951909 
 127.292333 35.962889 345.105538 
 127.292333 35.963000 350.650339 
 127.292333 35.963111 362.897762 
 127.292444 35.963111 350.546993 
 127.292444 35.963222 364.836182 
 127.292444 35.963333 382.508690 
 127.292444 35.963444 393.470668 
 127.292556 35.963444 383.883567 
 127.292556 35.963556 389.646661 
 127.292556 35.963667 392.621576 
 127.292667 35.963667 388.424093 
 127.292667 35.963778 389.813545 
 127.292667 35.963889 390.448009 
 127.292778 35.963889 387.306781 
 127.292778 35.964000 386.794993 
 127.292778 35.964111 386.159252 
 127.292889 35.964111 382.754808 
 127.292889 35.964222 382.338299 
 127.292889 35.964333 381.614154 
 127.293000 35.964333 366.594736 
 127.293000 35.964444 363.963490 
 127.293000 35.964556 362.893727 
 127.293111 35.964667 350.270394 
 127.293111 35.964778 352.084778 
 127.293111 35.964889 353.690783 
 127.293222 35.964889 347.098668 
 127.293222 35.965000 350.124732 
 127.293222 35.965111 354.763789 
 127.293333 35.965111 340.517221 
 127.293333 35.965222 353.846847 
 127.293333 35.965333 373.053579 
 127.293444 35.965333 359.291127 
 127.293444 35.965445 381.414402 
 127.293444 35.965556 398.745221 
 127.293556 35.965556 392.925515 
 127.293556 35.965667 403.937004 
 127.293556 35.965778 410.518406 
 127.293667 35.965778 407.306652 
 127.293667 35.965889 413.014539 
 127.293667 35.966000 420.605691 
 127.293778 35.966111 424.845456 
 127.293778 35.966222 437.903406 
 127.293778 35.966333 448.559765 
 127.293889 35.966333 436.675987 
 127.293889 35.966445 441.393907 
 127.293889 35.966556 446.777780 
 127.294000 35.966556 437.517365 
 127.294000 35.966667 442.045282 
 127.294000 35.966778 449.407672 
 127.294111 35.966778 435.617984 
 127.294111 35.966889 443.095241 
 127.294111 35.967000 450.328623 
 127.294222 35.967000 444.777740 
 127.294222 35.967111 447.906779 
 127.294222 35.967222 446.605100 
 127.294333 35.967222 450.961932 
 127.294333 35.967333 448.240316 
 127.294333 35.967445 441.797789 
 127.294444 35.967445 446.196679 
 127.294444 35.967556 434.957716 
 127.294444 35.967667 418.326374 
 127.294444 35.967778 404.987363 
 127.294556 35.967778 413.881014 
 127.294556 35.967889 401.982615 
 127.294556 35.968000 394.878830 
 127.294667 35.968000 408.590203 
 127.294667 35.968111 396.915462 
 127.294667 35.968222 384.703186 
 127.294778 35.968222 401.318914 
 127.294778 35.968333 385.928000 
 127.294778 35.968444 373.095604 
 127.294889 35.968444 385.840250 
 127.294889 35.968555 373.864590 
 127.294889 35.968667 364.433104 
 127.295000 35.968667 366.200056 
 127.295000 35.968778 357.218472 
 127.295000 35.968889 351.183768 
 127.295111 35.968889 349.296589 
 127.295111 35.969000 346.558648 
 127.295111 35.969111 344.685528 
 127.295111 35.969222 342.370160 
 127.295222 35.969222 342.340248 
 127.295222 35.969333 338.111601 
 127.295222 35.969444 332.618327 
 127.295333 35.969444 335.340328 
 127.295333 35.969555 331.015098 
 127.295333 35.969667 327.796748 
 127.295444 35.969667 332.884545 
 127.295444 35.969778 329.856976 
 127.295444 35.969889 324.751746 
 127.295556 35.969889 330.642422 
 127.295556 35.970000 324.582713 
 127.295556 35.970111 315.698456 
 127.295667 35.970111 327.543017 
 127.295667 35.970222 320.432307 
 127.295667 35.970333 310.733309 
 127.295778 35.970333 322.694796 
 127.295778 35.970444 311.053590 
 127.295778 35.970556 298.518128 
 127.295778 35.970667 291.149017 
 127.295889 35.970667 298.135179 
 127.295889 35.970778 291.332282 
 127.295889 35.970889 287.750386 
 127.296000 35.970889 296.213059 
 127.296000 35.971000 291.318376 
 127.296000 35.971111 286.070679 
 127.296111 35.971111 296.215038 
 127.296111 35.971222 293.264516 
 127.296111 35.971333 291.504902 
 127.296222 35.971333 297.634111 
 127.296222 35.971444 296.510059 
 127.296222 35.971556 295.742901 
 127.296333 35.971556 298.448984 
 127.296333 35.971667 297.271188 
 127.296333 35.971778 294.788489 
 127.296444 35.971778 300.841692 
 127.296444 35.971889 296.934836 
 127.296444 35.972000 291.468239 
 127.296444 35.972111 288.867325 
 127.296556 35.972111 292.550081 
 127.296556 35.972222 290.354299 
 127.296556 35.972333 287.807540 
 127.296667 35.972333 295.184057 
 127.296667 35.972444 288.188961 
 127.296667 35.972556 284.433761 
 127.296778 35.972556 284.741814 
 127.296778 35.972667 281.137023 
 127.296778 35.972778 277.366385 
 127.296889 35.972778 270.661231 
 127.296889 35.972889 266.169111 
 127.296889 35.973000 263.406295 
 127.297000 35.973000 266.556676 
 127.297000 35.973111 263.413795 
 127.297000 35.973222 258.947392 
 127.297111 35.973222 275.919685 
 127.297111 35.973333 269.326157 
 127.297111 35.973444 259.069077 
 127.297111 35.973556 247.265865 
 127.297222 35.973556 274.139964 
 127.297222 35.973667 261.185473 
 127.297222 35.973778 247.587088 
 127.297333 35.973778 258.913095 
 127.297333 35.973889 248.674050 
 127.297333 35.974000 243.284315 
 127.297444 35.974000 250.887187 
 127.297444 35.974111 245.022755 
 127.297444 35.974222 242.408528 
 127.297556 35.974222 251.993668 
 127.297556 35.974333 250.056185 
 127.297556 35.974444 249.048197 
 127.297667 35.974444 271.589643 
 127.297667 35.974556 270.674251 
 127.297667 35.974667 267.900759 
 127.297778 35.974778 273.012836 
 127.297778 35.974889 269.984064 
 127.297778 35.975000 267.650930 
 127.297889 35.975000 269.246304 
 127.297889 35.975111 268.405283 
 127.297889 35.975222 266.849789 
 127.298000 35.975222 262.071341 
 127.298000 35.975333 255.497406 
 127.298000 35.975444 245.284781 
 127.298111 35.975444 240.226371 
 127.298111 35.975556 235.724019 
 127.298111 35.975667 232.416827 
 127.298222 35.975667 227.911230 
 127.298222 35.975778 224.039806 
 127.298222 35.975889 219.574666 
 127.298333 35.975889 220.082367 
 127.298333 35.976000 217.657413 
 127.298333 35.976111 211.833715 
 127.298333 35.976222 198.991652 
 127.298444 35.976222 205.188467 
 127.298444 35.976333 183.983591 
 127.298444 35.976444 160.584776 
 127.298556 35.976444 179.235255 
 127.298556 35.976556 160.399049 
 127.298556 35.976667 148.086928 
 127.298667 35.976667 181.524237 
 127.298667 35.976778 164.028488 
 127.298667 35.976889 144.968291 
 127.298778 35.976889 171.733380 
 127.298778 35.977000 152.872739 
 127.298778 35.977111 136.699250 
 127.298889 35.977111 157.916563 
 127.298889 35.977222 148.698096 
 127.298889 35.977333 138.574598 
 127.299000 35.977333 150.410163 
 127.299000 35.977445 141.336997 
 127.299000 35.977556 130.512944 
 127.299000 35.977667 122.964384 
 127.299111 35.977667 125.118925 
 127.299111 35.977778 121.420562 
 127.299111 35.977889 120.045693 
 127.299222 35.977889 120.453925 
 127.299222 35.978000 120.251671 
 127.299222 35.978111 120.338125 
 127.299333 35.978111 120.250124 
 127.299333 35.978222 120.494677 
 127.299333 35.978333 120.850799 
 127.299444 35.978333 120.523421 
 127.299444 35.978445 120.966080 
 127.299444 35.978556 121.644757 
 127.299556 35.978556 120.733276 
 127.299556 35.978667 121.548779 
 127.299556 35.978778 122.852965 
 127.299667 35.978889 122.585668 
 127.299667 35.979000 123.790635 
 127.299667 35.979111 124.572628 
 127.299778 35.979111 122.774259 
 127.299778 35.979222 123.749692 
 127.299778 35.979333 124.652787 
 127.299889 35.979333 122.684696 
 127.299889 35.979445 124.018931 
 127.299889 35.979556 126.310635 
 127.300000 35.979556 123.930765 
 127.300000 35.979667 126.965577 
 127.300000 35.979778 130.962657 
 127.300111 35.979778 130.148967 
 127.300111 35.979889 135.455537 
 127.300111 35.980000 139.045485 
 127.300222 35.980000 139.398734 
 127.300222 35.980111 142.242815 
 127.300222 35.980222 144.136384 
 127.300222 35.980333 146.616492 
 127.300333 35.980333 145.503931 
 127.300333 35.980444 149.940786 
 127.300333 35.980555 157.144133 
 127.300444 35.980555 165.399921 
 127.300444 35.980667 175.461278 
 127.300444 35.980778 181.773292 
 127.300556 35.980778 180.390969 
 127.300556 35.980889 184.327901 
 127.300556 35.981000 187.268805 
 127.300667 35.981000 184.826730 
 127.300667 35.981111 191.561949 
 127.300667 35.981222 200.633000 
 127.300778 35.981222 209.496368 
 127.300778 35.981333 215.694549 
 127.300778 35.981444 218.994585 
 127.300889 35.981444 213.505377 
 127.300889 35.981555 218.898387 
 127.300889 35.981667 225.583059 
 127.300889 35.981778 236.605905 
 127.301000 35.981778 251.091023 
 127.301000 35.981889 263.424912 
 127.301000 35.982000 269.270243 
 127.301111 35.982000 265.977671 
 127.301111 35.982111 270.672017 
 127.301111 35.982222 271.961372 
 127.301222 35.982222 273.324228 
 127.301222 35.982333 273.647550 
 127.301222 35.982444 273.322732 
 127.301333 35.982444 271.829591 
 127.301333 35.982555 268.915572 
 127.301333 35.982667 264.651872 
 127.301444 35.982667 247.890598 
 127.301444 35.982778 242.614423 
 127.301444 35.982889 241.327125 
 127.301444 35.983000 243.441493 
 127.301556 35.983000 236.386203 
 127.301556 35.983111 239.258662 
 127.301556 35.983222 244.562266 
 127.301667 35.983222 232.824067 
 127.301667 35.983333 235.013584 
 127.301667 35.983444 238.365392 
 127.301778 35.983444 223.650577 
 127.301778 35.983556 224.970690 
 127.301778 35.983667 227.253853 
 127.301889 35.983667 220.221383 
 127.301889 35.983778 221.789024 
 127.301889 35.983889 223.818647 
 127.302000 35.983889 208.547321 
 127.302000 35.984000 206.812187 
 127.302000 35.984111 204.870484 
 127.302111 35.984222 195.727872 
 127.302111 35.984333 195.680157 
 127.302111 35.984444 196.119148 
 127.302222 35.984444 192.681197 
 127.302222 35.984556 194.305597 
 127.302222 35.984667 196.226860 
 127.302333 35.984667 194.009117 
 127.302333 35.984778 197.086620 
 127.302333 35.984889 198.628247 
 127.302444 35.984889 198.522213 
 127.302444 35.985000 201.308351 
 127.302444 35.985111 204.072159 
 127.302556 35.985111 220.771883 
 127.302556 35.985222 226.786179 
 127.302556 35.985333 230.778114 
 127.302667 35.985333 235.508416 
 127.302667 35.985444 236.646633 
 127.302667 35.985556 238.604781 
 127.302667 35.985667 244.509562 
 127.302778 35.985667 256.060552 
 127.302778 35.985778 274.110865 
 127.302778 35.985889 287.058976 
 127.302889 35.985889 287.472858 
 127.302889 35.986000 292.504550 
 127.302889 35.986111 294.411301 
 127.303000 35.986111 295.714426 
 127.303000 35.986222 301.247675 
 127.303000 35.986333 309.702409 
 127.303111 35.986333 327.139878 
 127.303111 35.986444 335.577461 
 127.303111 35.986556 340.209974 
 127.303222 35.986556 338.637132 
 127.303222 35.986667 342.858562 
 127.303222 35.986778 346.603863 
 127.303222 35.986889 352.333642 
 127.303333 35.986889 359.113278 
 127.303333 35.987000 364.639933 
 127.303333 35.987111 367.099164 
 127.303444 35.987111 366.268376 
 127.303444 35.987222 367.207850 
 127.303444 35.987333 366.922556 
 127.303556 35.987333 364.065702 
 127.303556 35.987444 360.784152 
 127.303556 35.987556 356.359657 
 127.303667 35.987556 351.061457 
 127.303667 35.987667 348.388944 
 127.303667 35.987778 347.582239 
 127.303778 35.987778 337.621501 
 127.303778 35.987889 338.860457 
 127.303778 35.988000 338.630948 
 127.303889 35.988000 324.816542 
 127.303889 35.988111 318.739404 
 127.303889 35.988222 307.857256 
 127.303889 35.988333 299.446573 
 127.304000 35.988333 294.144570 
 127.304000 35.988444 292.647121 
 127.304000 35.988556 291.934135 
 127.304111 35.988556 288.553234 
 127.304111 35.988667 286.589861 
 127.304111 35.988778 282.494522 
 127.304222 35.988778 259.549825 
 127.304222 35.988889 252.859053 
 127.304222 35.989000 247.670355 
 127.304333 35.989000 243.669733 
 127.304333 35.989111 242.257827 
 127.304333 35.989222 239.780257 
 127.304444 35.989222 236.298698 
 127.304444 35.989333 229.645535 
 127.304444 35.989444 218.426306 
 127.304444 35.989556 210.884266 
 127.304556 35.989556 219.406714 
 127.304556 35.989667 219.935366 
 127.304556 35.989778 221.284527 
 127.304667 35.989778 225.048925 
 127.304667 35.989889 226.162952 
 127.304667 35.990000 227.665377 
 127.304778 35.990000 229.414471 
 127.304778 35.990111 235.798683 
 127.304778 35.990222 246.997771 
 127.304889 35.990222 262.828515 
 127.304889 35.990333 270.764404 
 127.304889 35.990445 274.226664 
 127.305000 35.990445 275.311032 
 127.305000 35.990556 277.440566 
 127.305000 35.990667 282.073974 
 127.305000 35.990778 294.044287 
 127.305111 35.990778 304.243273 
 127.305111 35.990889 317.459735 
 127.305111 35.991000 322.951461 
 127.305222 35.991000 329.331671 
 127.305222 35.991111 331.063751 
 127.305222 35.991222 331.601062 
 127.305333 35.991222 334.918847 
 127.305333 35.991333 336.678904 
 127.305333 35.991445 339.787076 
 127.305444 35.991445 342.311705 
 127.305444 35.991556 344.197696 
 127.305444 35.991667 345.313210 
 127.305556 35.991667 344.889241 
 127.305556 35.991778 346.307399 
 127.305556 35.991889 348.602924 
 127.305667 35.991889 349.214787 
 127.305667 35.992000 354.263567 
 127.305667 35.992111 356.900310 
 127.305667 35.992222 357.605797 
 127.305778 35.992222 356.965560 
 127.305778 35.992333 358.109142 
 127.305778 35.992445 358.517465 
 127.305889 35.992445 359.321077 
 127.305889 35.992556 361.948846 
 127.305889 35.992667 363.937404 
 127.306000 35.992667 364.102259 
 127.306000 35.992778 365.725208 
 127.306000 35.992889 366.545081 
 127.306111 35.992889 371.213491 
 127.306111 35.993000 372.366250 
 127.306111 35.993111 374.952442 
 127.306222 35.993111 387.120751 
 127.306222 35.993222 388.725012 
 127.306222 35.993333 390.729865 
 127.306222 35.993444 394.099705 
 127.306333 35.993444 393.282265 
 127.306333 35.993555 396.247653 
 127.306333 35.993667 403.437250 
 127.306444 35.993667 411.730873 
 127.306444 35.993778 423.098243 
 127.306444 35.993889 433.613375 
 127.306556 35.993889 439.240810 
 127.306556 35.994000 441.532728 
 127.306556 35.994111 442.811616 
 127.306667 35.994111 446.181954 
 127.306667 35.994222 447.873391 
 127.306667 35.994333 452.915357 
 127.306778 35.994333 468.028008 
 127.306778 35.994444 472.184619 
 127.306778 35.994555 475.071547 
 127.306778 35.994667 477.783391 
 127.306889 35.994667 476.618700 
 127.306889 35.994778 478.432687 
 127.306889 35.994889 483.536303 
 127.307000 35.994889 489.434282 
 127.307000 35.995000 494.141640 
 127.307000 35.995111 503.022721 
 127.307111 35.995111 502.967264 
 127.307111 35.995222 514.856751 
 127.307111 35.995333 532.214564 
 127.307222 35.995333 536.524225 
 127.307222 35.995444 545.267066 
 127.307222 35.995556 549.088725 
 127.307333 35.995556 545.860629 
 127.307333 35.995667 549.220267 
 127.307333 35.995778 552.689173 
 127.307444 35.995778 553.983450 
 127.307444 35.995889 562.037019 
 127.307444 35.996000 573.046589 
 127.307444 35.996111 583.647768 
 127.307556 35.996111 577.870164 
 127.307556 35.996222 583.230707 
 127.307556 35.996333 584.897329 
 127.307667 35.996333 578.367819 
 127.307667 35.996444 579.193991 
 127.307667 35.996556 578.901200 
 127.307778 35.996556 574.488046 
 127.307778 35.996667 571.550342 
 127.307778 35.996778 567.676953 
 127.307889 35.996778 555.944399 
 127.307889 35.996889 553.156289 
 127.307889 35.997000 551.927877 
 127.308000 35.997000 547.300473 
 127.308000 35.997111 547.599137 
 127.308000 35.997222 547.728396 
 127.308000 35.997333 547.898014 
 127.308111 35.997333 539.160402 
 127.308111 35.997444 539.436622 
 127.308111 35.997556 541.157906 
 127.308222 35.997556 534.601046 
 127.308222 35.997667 536.722745 
 127.308222 35.997778 541.193526 
 127.308333 35.997778 546.639885 
 127.308333 35.997889 552.614483 
 127.308333 35.998000 554.827568 
 127.308444 35.998000 557.933987 
 127.308444 35.998111 558.440818 
 127.308444 35.998222 557.928328 
 127.308556 35.998222 556.456879 
 127.308556 35.998333 556.520722 
 127.308556 35.998444 556.707815 
 127.308556 35.998556 556.769698 
 127.308667 35.998556 557.601662 
 127.308667 35.998667 558.980480 
 127.308667 35.998778 561.031063 
 127.308778 35.998778 570.446388 
 127.308778 35.998889 577.901434 
 127.308778 35.999000 585.552711 
 127.308889 35.999000 595.053235 
 127.308889 35.999111 597.067843 
 127.308889 35.999222 594.912475 
 127.309000 35.999222 590.972532 
 127.309000 35.999333 583.930043 
 127.309000 35.999444 574.395078 
 127.309111 35.999444 573.495799 
 127.309111 35.999556 565.950447 
 127.309111 35.999667 558.628676 
 127.309111 35.999778 549.414460 
 127.309222 35.999778 552.312796 
 127.309222 35.999889 530.109892 
 127.309222 36.000000 510.565879 
 127.309333 36.000000 520.768480 
 127.309333 36.000111 507.143869 
 127.309333 36.000222 498.594270 
 127.309444 36.000222 523.406751 
 127.309444 36.000333 512.972185 
 127.309444 36.000444 499.052154 
 127.309556 36.000444 523.333565 
 127.309556 36.000556 506.013269 
 127.309556 36.000667 481.428820 
 127.309667 36.000667 501.899815 
 127.309667 36.000778 479.905849 
 127.309667 36.000889 455.672433 
 127.309667 36.001000 440.500433 
 127.309778 36.001000 455.146859 
 127.309778 36.001111 438.005165 
 127.309778 36.001222 427.698086 
 127.309889 36.001222 438.664537 
 127.309889 36.001333 424.590015 
 127.309889 36.001444 413.813012 
 127.310000 36.001444 426.693840 
 127.310000 36.001556 412.003157 
 127.310000 36.001667 402.180169 
 127.310111 36.001667 399.123407 
 127.310111 36.001778 390.295338 
 127.310111 36.001889 384.992480 
 127.310222 36.001889 385.819030 
 127.310222 36.002000 382.123756 
 127.310222 36.002111 379.355529 
 127.310222 36.002222 376.328773 
 127.310333 36.002222 378.485121 
 127.310333 36.002333 374.445842 
 127.310333 36.002444 368.897097 
 127.310444 36.002444 378.702482 
 127.310444 36.002556 374.248084 
 127.310444 36.002667 370.027526 
 127.310556 36.002667 389.168958 
 127.310556 36.002778 387.435876 
 127.310556 36.002889 384.223617 
 127.310667 36.002889 392.580574 
 127.310667 36.003000 389.561914 
 127.310667 36.003111 382.387483 
 127.310778 36.003111 387.112594 
 127.310778 36.003222 375.804785 
 127.310778 36.003333 359.238098 
 127.310778 36.003445 346.776779 
 127.310889 36.003445 349.301119 
 127.310889 36.003556 339.534798 
 127.310889 36.003667 333.010081 
 127.311000 36.003667 334.939680 
 127.311000 36.003778 326.699588 
 127.311000 36.003889 319.394772 
 127.311111 36.003889 330.866748 
 127.311111 36.004000 327.489502 
 127.311111 36.004111 325.649266 
 127.311222 36.004111 332.445651 
 127.311222 36.004222 331.043540 
 127.311222 36.004333 329.631612 
 127.311333 36.004333 334.900002 
 127.311333 36.004445 332.762887 
 127.311333 36.004556 328.177764 
 127.311333 36.004667 319.510099 
 127.311444 36.004667 329.857684 
 127.311444 36.004778 314.389732 
 127.311444 36.004889 302.385617 
 127.311556 36.004889 317.317519 
 127.311556 36.005000 308.080503 
 127.311556 36.005111 301.723596 
 127.311667 36.005111 318.809217 
 127.311667 36.005222 311.775627 
 127.311667 36.005333 302.419181 
 127.311778 36.005333 310.638742 
 127.311778 36.005444 298.639899 
 127.311778 36.005555 285.874460 
 127.311889 36.005555 288.411319 
 127.311889 36.005667 282.605465 
 127.311889 36.005778 278.391880 
 127.311889 36.005889 276.279447 
 127.312000 36.005889 282.079894 
 127.312000 36.006000 283.657929 
 127.312000 36.006111 287.102588 
 127.312111 36.006111 282.821050 
 127.312111 36.006222 287.113304 
 127.312111 36.006333 291.380676 
 127.312222 36.006333 281.886797 
 127.312222 36.006444 287.150557 
 127.312222 36.006555 292.419811 
 127.312333 36.006555 284.846296 
 127.312333 36.006667 291.239810 
 127.312333 36.006778 299.753778 
 127.312444 36.006778 290.626698 
 127.312444 36.006889 298.788717 
 127.312444 36.007000 308.938496 
 127.312444 36.007111 317.697203 
 127.312556 36.007111 309.009882 
 127.312556 36.007222 317.910707 
 127.312556 36.007333 326.559230 
 127.312667 36.007333 320.187927 
 127.312667 36.007444 329.829782 
 127.312667 36.007555 340.266422 
 127.312778 36.007555 334.331718 
 127.312778 36.007667 343.113264 
 127.312778 36.007778 350.137724 
 127.312889 36.007778 349.082916 
 127.312889 36.007889 353.846345 
 127.312889 36.008000 360.786209 
 127.313000 36.008000 357.664181 
 127.313000 36.008111 366.818957 
 127.313000 36.008222 378.025943 
 127.313000 36.008333 385.678853 
 127.313111 36.008333 391.415538 
 127.313111 36.008444 395.576149 
 127.313111 36.008556 397.816200 
 127.313222 36.008556 398.417601 
 127.313222 36.008667 399.695727 
 127.313222 36.008778 401.708808 
 127.313333 36.008778 400.083972 
 127.313333 36.008889 404.167980 
 127.313333 36.009000 411.309244 
 127.313444 36.009000 423.977158 
 127.313444 36.009111 430.052030 
 127.313444 36.009222 432.758846 
 127.313556 36.009222 434.624318 
 127.313556 36.009333 436.210282 
 127.313556 36.009444 438.193624 
 127.313556 36.009556 440.972697 
 127.313667 36.009556 449.903996 
 127.313667 36.009667 452.603641 
 127.313667 36.009778 455.518686 
 127.313778 36.009778 458.564343 
 127.313778 36.009889 463.975491 
 127.313778 36.010000 471.421085 
 127.313889 36.010000 472.340769 
 127.313889 36.010111 476.677353 
 127.313889 36.010222 478.343939 
 127.314000 36.010222 478.675798 
 127.314000 36.010333 479.930509 
 127.314000 36.010444 480.313243 
 127.314111 36.010444 487.939271 
 127.314111 36.010556 487.994529 
 127.314111 36.010667 485.784756 
 127.314111 36.010778 481.906083 
 127.314222 36.010778 491.543208 
 127.314222 36.010889 485.174844 
 127.314222 36.011000 476.426568 
 127.314333 36.011000 490.294064 
 127.314333 36.011111 479.529185 
 127.314333 36.011222 469.515522 
 127.314444 36.011222 485.243488 
 127.314444 36.011333 471.340397 
 127.314444 36.011444 457.662760 
 127.314556 36.011444 463.324459 
 127.314556 36.011556 449.107583 
 127.314556 36.011667 433.564915 
 127.314667 36.011667 450.773670 
 127.314667 36.011778 437.760528 
 127.314667 36.011889 420.651145 
 127.314667 36.012000 405.086468 
 127.314778 36.012000 425.293973 
 127.314778 36.012111 406.092363 
 127.314778 36.012222 390.629682 
 127.314889 36.012222 418.370188 
 127.314889 36.012333 397.054551 
 127.314889 36.012444 378.408876 
 127.315000 36.012444 385.357843 
 127.315000 36.012556 365.619667 
 127.315000 36.012667 356.081120 
 127.315111 36.012667 363.733615 
 127.315111 36.012778 356.298025 
 127.315111 36.012889 353.088505 
 127.315222 36.012889 361.461457 
 127.315222 36.013000 357.531735 
 127.315222 36.013111 354.285275 
 127.315333 36.013111 368.661875 
 127.315333 36.013222 359.723494 
 127.315333 36.013333 354.257922 
 127.315333 36.013444 352.020219 
 127.315444 36.013444 357.638452 
 127.315444 36.013556 354.385878 
 127.315444 36.013667 352.327431 
 127.315556 36.013667 361.908389 
 127.315556 36.013778 353.857153 
 127.315556 36.013889 348.123315 
 127.315667 36.013889 348.437673 
 127.315667 36.014000 340.909986 
 127.315667 36.014111 337.510471 
 127.315778 36.014111 339.547901 
 127.315778 36.014222 335.827243 
 127.315778 36.014333 333.938919 
 127.315889 36.014333 333.229679 
 127.315889 36.014444 327.579637 
 127.315889 36.014556 319.502295 
 127.315889 36.014667 309.673024 
 127.316000 36.014667 299.662724 
 127.316000 36.014778 296.013773 
 127.316000 36.014889 294.767967 
 127.316111 36.014889 297.152001 
 127.316111 36.015000 299.414498 
 127.316111 36.015111 304.179381 
 127.316222 36.015111 314.357830 
 127.316222 36.015222 317.686607 
 127.316222 36.015333 318.683957 
 127.316333 36.015333 321.624094 
 127.316333 36.015445 320.615352 
 127.316333 36.015556 318.493662 
 127.316444 36.015556 322.264399 
 127.316444 36.015667 315.412215 
 127.316444 36.015778 300.669495 
 127.316444 36.015889 278.640366 
 127.316556 36.015889 271.903054 
 127.316556 36.016000 257.759534 
 127.316556 36.016111 251.145510 
 127.316667 36.016111 257.479950 
 127.316667 36.016222 251.346672 
 127.316667 36.016333 248.963596 
 127.316778 36.016333 252.355273 
 127.316778 36.016445 250.685653 
 127.316778 36.016556 251.848655 
 127.316889 36.016556 253.052360 
 127.316889 36.016667 256.381980 
 127.316889 36.016778 264.590398 
 127.317000 36.016778 262.523573 
 127.317000 36.016889 275.798504 
 127.317000 36.017000 291.983314 
 127.317000 36.017111 302.880636 
 127.317111 36.017111 293.759067 
 127.317111 36.017222 304.602045 
 127.317111 36.017333 311.640041 
 127.317222 36.017333 305.371716 
 127.317222 36.017445 315.533734 
 127.317222 36.017556 326.052182 
 127.317333 36.017556 312.667377 
 127.317333 36.017667 322.884899 
 127.317333 36.017778 334.842856 
 127.317444 36.017778 317.701443 
 127.317444 36.017889 330.747053 
 127.317444 36.018000 345.411317 
 127.317556 36.018000 332.041299 
 127.317556 36.018111 347.398176 
 127.317556 36.018222 360.587661 
 127.317667 36.018333 355.005179 
 127.317667 36.018444 365.889056 
 127.317667 36.018555 372.876805 
 127.317778 36.018555 357.967993 
 127.317778 36.018667 369.081156 
 127.317778 36.018778 379.296545 
 127.317889 36.018778 360.274783 
 127.317889 36.018889 372.403786 
 127.317889 36.019000 380.992520 
 127.318000 36.019000 372.022978 
 127.318000 36.019111 379.034688 
 127.318000 36.019222 383.167737 
 127.318111 36.019222 380.414630 
 127.318111 36.019333 386.053919 
 127.318111 36.019444 393.920340 
 127.318222 36.019444 400.378714 
 127.318222 36.019555 416.565286 
 127.318222 36.019667 429.856748 
 127.318222 36.019778 436.895193 
 127.318333 36.019778 439.816353 
 127.318333 36.019889 442.081918 
 127.318333 36.020000 440.982640 
 127.318444 36.020000 441.643069 
 127.318444 36.020111 440.044603 
 127.318444 36.020222 435.107763 
 127.318556 36.020222 437.605631 
 127.318556 36.020333 431.275645 
 127.318556 36.020444 419.574146 
 127.318667 36.020444 437.896829 
 127.318667 36.020555 426.588049 
 127.318667 36.020667 413.325096 
 127.318778 36.020667 438.037274 
 127.318778 36.020778 423.202336 
 127.318778 36.020889 404.094759 
 127.318778 36.021000 384.803627 
 127.318889 36.021000 400.670695 
 127.318889 36.021111 379.388320 
 127.318889 36.021222 361.581041 
 127.319000 36.021222 391.985589 
 127.319000 36.021333 374.422990 
 127.319000 36.021444 357.505382 
 127.319111 36.021444 377.528968 
 127.319111 36.021556 360.169181 
 127.319111 36.021667 344.745234 
 127.319222 36.021667 356.332624 
 127.319222 36.021778 348.185574 
 127.319222 36.021889 340.303702 
 127.319333 36.021889 353.214800 
 127.319333 36.022000 348.776433 
 127.319333 36.022111 345.194502 
 127.319444 36.022222 352.031450 
 127.319444 36.022333 350.599193 
 127.319444 36.022444 350.298479 
 127.319556 36.022444 363.783262 
 127.319556 36.022556 361.449126 
 127.319556 36.022667 359.087713 
 127.319667 36.022667 366.970341 
 127.319667 36.022778 364.151776 
 127.319667 36.022889 361.694815 
 127.319778 36.022889 363.699987 
 127.319778 36.023000 357.708292 
 127.319778 36.023111 348.935297 
 127.319889 36.023111 342.547673 
 127.319889 36.023222 333.299014 
 127.319889 36.023333 329.681933 
 127.320000 36.023333 331.979423 
 127.320000 36.023444 331.456990 
 127.320000 36.023556 331.918203 
 127.320000 36.023667 333.681985 
 127.320111 36.023667 337.361775 
 127.320111 36.023778 341.215265 
 127.320111 36.023889 350.245053 
 127.320222 36.023889 362.151282 
 127.320222 36.024000 372.489999 
 127.320222 36.024111 376.924708 
 127.320333 36.024111 378.892049 
 127.320333 36.024222 379.939165 
 127.320333 36.024333 380.947138 
 127.320444 36.024333 382.946336 
 127.320444 36.024444 385.232678 
 127.320444 36.024556 391.307169 
 127.320556 36.024556 396.485957 
 127.320556 36.024667 408.774781 
 127.320556 36.024778 423.351521 
 127.320556 36.024889 431.385153 
 127.320667 36.024889 432.034047 
 127.320667 36.025000 436.488373 
 127.320667 36.025111 438.728242 
 127.320778 36.025111 436.779805 
 127.320778 36.025222 442.413741 
 127.320778 36.025333 450.721426 
 127.320889 36.025333 445.249154 
 127.320889 36.025444 458.959017 
 127.320889 36.025556 474.820583 
 127.321000 36.025556 462.230494 
 127.321000 36.025667 472.320478 
 127.321000 36.025778 482.269286 
 127.321111 36.025778 471.701981 
 127.321111 36.025889 478.938042 
 127.321111 36.026000 490.476239 
 127.321222 36.026000 482.220591 
 127.321222 36.026111 493.925611 
 127.321222 36.026222 507.050330 
 127.321222 36.026333 516.518487 
 127.321333 36.026333 525.756353 
 127.321333 36.026444 530.968890 
 127.321333 36.026556 531.394032 
 127.321444 36.026556 538.921874 
 127.321444 36.026667 537.314189 
 127.321444 36.026778 532.897786 
 127.321556 36.026778 534.780895 
 127.321556 36.026889 527.008781 
 127.321556 36.027000 515.939424 
 127.321667 36.027000 505.253564 
 127.321667 36.027111 495.126364 
 127.321667 36.027222 488.441082 
 127.321778 36.027222 488.182788 
 127.321778 36.027333 484.452054 
 127.321778 36.027444 481.772833 
 127.321889 36.027444 477.783911 
 127.321889 36.027556 472.366606 
 127.321889 36.027667 464.877110 
 127.321889 36.027778 455.815025 
 127.322000 36.027778 436.386229 
 127.322000 36.027889 432.412068 
 127.322000 36.028000 431.363603 
 127.322111 36.028000 428.485482 
 127.322111 36.028111 428.287291 
 127.322111 36.028222 429.097565 
 127.322222 36.028222 427.593185 
 127.322222 36.028333 427.704221 
 127.322222 36.028445 428.023857 
 127.322333 36.028445 418.833118 
 127.322333 36.028556 417.557087 
 127.322333 36.028667 417.414509 
 127.322444 36.028667 411.044911 
 127.322444 36.028778 412.803935 
 127.322444 36.028889 413.688753 
 127.322556 36.028889 408.926257 
 127.322556 36.029000 409.893683 
 127.322556 36.029111 409.031988 
 127.322556 36.029222 406.047428 
 127.322667 36.029222 397.047280 
 127.322667 36.029333 395.513472 
 127.322667 36.029445 393.756546 
 127.322778 36.029445 387.783589 
 127.322778 36.029556 386.922485 
 127.322778 36.029667 384.421867 
 127.322889 36.029667 378.024744 
 127.322889 36.029778 373.879219 
 127.322889 36.029889 369.869079 
 127.323000 36.029889 363.766272 
 127.323000 36.030000 360.965291 
 127.323000 36.030111 359.520577 
 127.323111 36.030111 357.323970 
 127.323111 36.030222 355.720091 
 127.323111 36.030333 351.361171 
 127.323222 36.030333 343.486511 
 127.323222 36.030444 332.385643 
 127.323222 36.030555 323.836864 
 127.323222 36.030667 319.945171 
 127.323333 36.030667 319.349687 
 127.323333 36.030778 317.316911 
 127.323333 36.030889 314.229675 
 127.323444 36.030889 310.254393 
 127.323444 36.031000 303.819077 
 127.323444 36.031111 297.842273 
 127.323556 36.031111 293.628500 
 127.323556 36.031222 292.551798 
 127.323556 36.031333 291.854497 
 127.323667 36.031333 293.771484 
 127.323667 36.031444 295.387493 
 127.323667 36.031555 297.429967 
 127.323778 36.031555 300.813964 
 127.323778 36.031667 301.842623 
 127.323778 36.031778 302.140495 
 127.323889 36.031778 305.836211 
 127.323889 36.031889 307.546498 
 127.323889 36.032000 309.818719 
 127.323889 36.032111 310.279623 
 127.324000 36.032111 318.716493 
 127.324000 36.032222 318.204480 
 127.324000 36.032333 316.925010 
 127.324111 36.032333 319.752654 
 127.324111 36.032444 312.543660 
 127.324111 36.032555 301.041631 
 127.324222 36.032555 303.530739 
 127.324222 36.032667 294.966341 
 127.324222 36.032778 292.017621 
 127.324333 36.032778 295.132995 
 127.324333 36.032889 289.755472 
 127.324333 36.033000 287.501508 
 127.324444 36.033000 287.006155 
 127.324444 36.033111 286.547584 
 127.324444 36.033222 289.798645 
 127.324556 36.033333 301.123567 
 127.324556 36.033444 305.015407 
 127.324556 36.033556 305.962509 
 127.324667 36.033556 308.971011 
 127.324667 36.033667 308.774545 
 127.324667 36.033778 307.684373 
 127.324778 36.033778 312.540705 
 127.324778 36.033889 310.121609 
 127.324778 36.034000 305.163393 
 127.324889 36.034000 311.659124 
 127.324889 36.034111 305.629686 
 127.324889 36.034222 294.762832 
 127.325000 36.034222 310.990886 
 127.325000 36.034333 302.986257 
 127.325000 36.034444 290.394097 
 127.325111 36.034444 288.544897 
 127.325111 36.034556 282.591361 
 127.325111 36.034667 277.660613 
 127.325111 36.034778 271.093019 
 127.325222 36.034778 278.404939 
 127.325222 36.034889 274.190068 
 127.325222 36.035000 267.907274 
 127.325333 36.035000 278.112061 
 127.325333 36.035111 275.555424 
 127.325333 36.035222 271.178634 
 127.325444 36.035222 278.299268 
 127.325444 36.035333 275.402522 
 127.325444 36.035444 269.344821 
 127.325556 36.035444 276.251491 
 127.325556 36.035556 270.327850 
 127.325556 36.035667 263.969147 
 127.325667 36.035667 267.435967 
 127.325667 36.035778 264.993669 
 127.325667 36.035889 262.117248 
 127.325778 36.035889 263.312869 
 127.325778 36.036000 259.907753 
 127.325778 36.036111 256.883382 
 127.325778 36.036222 255.083192 
 127.325889 36.036222 257.151013 
 127.325889 36.036333 255.255433 
 127.325889 36.036444 253.804071 
 127.326000 36.036444 254.607140 
 127.326000 36.036556 251.988033 
 127.326000 36.036667 250.250542 
 127.326111 36.036667 248.578854 
 127.326111 36.036778 244.245068 
 127.326111 36.036889 240.875636 
 127.326222 36.036889 243.619439 
 127.326222 36.037000 239.514145 
 127.326222 36.037111 238.061544 
 127.326333 36.037111 244.067737 
 127.326333 36.037222 240.414640 
 127.326333 36.037333 235.148976 
 127.326333 36.037444 231.660372 
 127.326444 36.037444 232.554640 
 127.326444 36.037556 230.203114 
 127.326444 36.037667 230.612389 
 127.326556 36.037667 230.947449 
 127.326556 36.037778 233.079979 
 127.326556 36.037889 238.001906 
 127.326667 36.037889 237.567545 
 127.326667 36.038000 238.656444 
 127.326667 36.038111 240.227532 
 127.326778 36.038111 239.244175 
 127.326778 36.038222 241.726719 
 127.326778 36.038333 247.838904 
 127.326889 36.038333 243.507832 
 127.326889 36.038444 251.145093 
 127.326889 36.038556 259.289638 
 127.327000 36.038556 250.062557 
 127.327000 36.038667 258.579093 
 127.327000 36.038778 262.724638 
 127.327000 36.038889 264.337491 
 127.327111 36.038889 262.088251 
 127.327111 36.039000 265.909026 
 127.327111 36.039111 270.308228 
 127.327222 36.039111 269.583180 
 127.327222 36.039222 275.487486 
 127.327222 36.039333 278.699418 
 127.327333 36.039333 271.457955 
 127.327333 36.039444 275.822176 
 127.327333 36.039556 279.100095 
 127.327444 36.039556 271.229217 
 127.327444 36.039667 279.605565 
 127.327444 36.039778 289.497855 
 127.327556 36.039778 281.856338 
 127.327556 36.039889 294.853333 
 127.327556 36.040000 304.266620 
 127.327556 36.040111 309.646741 
 127.327667 36.040111 302.068021 
 127.327667 36.040222 308.164419 
 127.327667 36.040333 312.256696 
 127.327778 36.040333 302.746992 
 127.327778 36.040445 307.934222 
 127.327778 36.040556 315.179967 
 127.327889 36.040556 298.875092 
 127.327889 36.040667 309.898568 
 127.327889 36.040778 325.044755 
 127.328000 36.040778 305.671743 
 127.328000 36.040889 320.187260 
 127.328000 36.041000 333.194156 
 127.328111 36.041000 305.806853 
 127.328111 36.041111 317.869827 
 127.328111 36.041222 330.977061 
 127.328111 36.041333 340.793026 
 127.328222 36.041333 322.458288 
 127.328222 36.041445 331.121385 
 127.328222 36.041556 336.496616 
 127.328333 36.041556 325.510287 
 127.328333 36.041667 325.602632 
 127.328333 36.041778 322.661511 
 127.328444 36.041778 315.857393 
 127.328444 36.041889 307.696248 
 127.328444 36.042000 300.852066 
 127.328556 36.042000 296.181657 
 127.328556 36.042111 293.090926 
 127.328556 36.042222 291.739236 
 127.328667 36.042222 290.475651 
 127.328667 36.042333 289.214931 
 127.328667 36.042445 286.255279 
 127.328778 36.042556 256.580750 
 127.328778 36.042667 248.176744 
 127.328778 36.042778 245.454109 
 127.328889 36.042778 242.783457 
 127.328889 36.042889 242.411461 
 127.328889 36.043000 242.118201 
 127.329000 36.043000 237.992334 
 127.329000 36.043111 236.955269 
 127.329000 36.043222 233.392039 
 127.329111 36.043222 219.072748 
 127.329111 36.043333 210.705904 
 127.329111 36.043444 198.797370 
 127.329222 36.043444 190.835599 
 127.329222 36.043555 186.498310 
 127.329222 36.043667 185.266209 
 127.329333 36.043667 184.320099 
 127.329333 36.043778 184.205425 
 127.329333 36.043889 184.346954 
 127.329333 36.044000 184.610504 
 127.329444 36.044000 188.811157 
 127.329444 36.044111 190.322836 
 127.329444 36.044222 190.943942 
 127.329556 36.044222 194.064038 
 127.329556 36.044333 193.789738 
 127.329556 36.044444 193.013977 
 127.329667 36.044444 198.837763 
 127.329667 36.044555 198.015991 
 127.329667 36.044667 195.833218 
 127.329778 36.044667 211.034699 
 127.329778 36.044778 207.295364 
 127.329778 36.044889 201.004070 
 127.329889 36.044889 219.166354 
 127.329889 36.045000 212.880801 
 127.329889 36.045111 206.519213 
 127.329889 36.045222 203.087786 
 127.330000 36.045222 214.620844 
 127.330000 36.045333 208.319531 
 127.330000 36.045444 203.106401 
 127.330111 36.045444 214.113860 
 127.330111 36.045555 201.436523 
 127.330111 36.045667 191.906236 
 127.330222 36.045667 197.018089 
 127.330222 36.045778 189.466709 
 127.330222 36.045889 186.145130 
 127.330333 36.045889 192.568434 
 127.330333 36.046000 188.399727 
 127.330333 36.046111 186.276053 
 127.330444 36.046111 193.210742 
 127.330444 36.046222 187.044689 
 127.330444 36.046333 185.066329 
 127.330556 36.046444 186.458041 
 127.330556 36.046556 188.868641 
 127.330556 36.046667 192.739271 
 127.330667 36.046667 199.680203 
 127.330667 36.046778 202.590242 
 127.330667 36.046889 205.299706 
 127.330778 36.046889 203.488548 
 127.330778 36.047000 207.102841 
 127.330778 36.047111 213.618475 
 127.330889 36.047111 216.347146 
 127.330889 36.047222 224.342348 
 127.330889 36.047333 230.499007 
 127.331000 36.047333 226.555909 
 127.331000 36.047444 228.838825 
 127.331000 36.047556 232.346321 
 127.331111 36.047556 225.508785 
 127.331111 36.047667 229.276746 
 127.331111 36.047778 237.178044 
 127.331111 36.047889 248.479273 
 127.331222 36.047889 224.281868 
 127.331222 36.048000 234.856878 
 127.331222 36.048111 245.839651 
 127.331333 36.048111 228.119306 
 127.331333 36.048222 239.522331 
 127.331333 36.048333 247.643540 
 127.331444 36.048333 230.685793 
 127.331444 36.048444 239.841163 
 127.331444 36.048556 245.366081 
 127.331556 36.048556 226.686347 
 127.331556 36.048667 228.724346 
 127.331556 36.048778 228.877320 
 127.331667 36.048778 221.249230 
 127.331667 36.048889 220.815503 
 127.331667 36.049000 220.849734 
 127.331667 36.049111 221.210525 
 127.331778 36.049111 218.825742 
 127.331778 36.049222 218.894291 
 127.331778 36.049333 218.835967 
 127.331889 36.049333 213.658707 
 127.331889 36.049444 211.302793 
 127.331889 36.049556 208.283112 
 127.332000 36.049556 199.335486 
 127.332000 36.049667 199.275516 
 127.332000 36.049778 199.141891 
 127.332111 36.049778 195.772520 
 127.332111 36.049889 195.579900 
 127.332111 36.050000 194.627510 
 127.332222 36.050000 179.649590 
 127.332222 36.050111 177.911678 
 127.332222 36.050222 177.992858 
 127.332333 36.050222 174.316538 
 127.332333 36.050333 176.431582 
 127.332333 36.050444 183.063418 
 127.332333 36.050556 196.304050 
 127.332444 36.050556 197.716334 
 127.332444 36.050667 207.939579 
 127.332444 36.050778 212.487210 
 127.332556 36.050778 202.879885 
 127.332556 36.050889 207.051273 
 127.332556 36.051000 205.241170 
 127.332667 36.051000 194.006053 
 127.332667 36.051111 193.696735 
 127.332667 36.051222 193.008170 
 127.332778 36.051222 188.064507 
 127.332778 36.051333 188.083635 
 127.332778 36.051444 187.328034 
 127.332889 36.051444 185.567280 
 127.332889 36.051556 182.682613 
 127.332889 36.051667 174.932633 
 127.332889 36.051778 164.179514 
 127.333000 36.051778 161.206321 
 127.333000 36.051889 155.810261 
 127.333000 36.052000 153.990835 
 127.333111 36.052000 156.202473 
 127.333111 36.052111 155.515371 
 127.333111 36.052222 155.178532 
 127.333222 36.052222 159.248622 
 127.333222 36.052333 158.993754 
 127.333222 36.052444 158.911593 
 127.333333 36.052444 164.055410 
 127.333333 36.052556 163.221055 
 127.333333 36.052667 162.439060 
 127.333444 36.052667 176.783775 
 127.333444 36.052778 175.885235 
 127.333444 36.052889 173.038074 
 127.333556 36.052889 178.025470 
 127.333556 36.053000 173.242313 
 127.333556 36.053111 163.485697 
 127.333556 36.053222 153.936900 
 127.333667 36.053222 165.260403 
 127.333667 36.053333 160.037393 
 127.333667 36.053445 154.596247 
 127.333778 36.053445 164.081676 
 127.333778 36.053556 162.438223 
 127.333778 36.053667 161.087063 
 127.333889 36.053667 163.527192 
 127.333889 36.053778 163.214771 
 127.333889 36.053889 163.690730 
 127.334000 36.053889 169.081092 
 127.334000 36.054000 169.905875 
 127.334000 36.054111 173.130579 
 127.334111 36.054111 182.210041 
 127.334111 36.054222 186.626166 
 127.334111 36.054333 199.130102 
 127.334111 36.054445 216.827656 
 127.334222 36.054445 214.663141 
 127.334222 36.054556 222.631286 
 127.334222 36.054667 226.744666 
 127.334333 36.054667 229.228422 
 127.334333 36.054778 232.836217 
 127.334333 36.054889 233.009787 
 127.334444 36.054889 236.727336 
 127.334444 36.055000 235.702603 
 127.334444 36.055111 232.108360 
 127.334556 36.055111 237.296719 
 127.334556 36.055222 233.387014 
 127.334556 36.055333 227.087614 
 127.334667 36.055333 225.605833 
 127.334667 36.055444 219.587382 
 127.334667 36.055556 216.363902 
 127.334667 36.055667 215.028925 
 127.334778 36.055667 215.861096 
 127.334778 36.055778 215.336700 
 127.334778 36.055889 215.945752 
 127.334889 36.055889 220.012916 
 127.334889 36.056000 226.550727 
 127.334889 36.056111 235.228944 
 127.335000 36.056111 243.747494 
 127.335000 36.056222 246.064928 
 127.335000 36.056333 246.838988 
 127.335111 36.056333 250.021100 
 127.335111 36.056444 250.611831 
 127.335111 36.056555 251.688952 
 127.335222 36.056555 255.665458 
 127.335222 36.056667 257.246672 
 127.335222 36.056778 262.267331 
 127.335333 36.056778 273.749011 
 127.335333 36.056889 289.132426 
 127.335333 36.057000 303.116436 
 127.335333 36.057111 310.117454 
 127.335444 36.057111 313.980809 
 127.335444 36.057222 318.297204 
 127.335444 36.057333 320.009220 
 127.335556 36.057333 332.476041 
 127.335556 36.057444 332.248341 
 127.335556 36.057555 330.063993 
 127.335667 36.057555 334.668185 
 127.335667 36.057667 333.063470 
 127.335667 36.057778 328.741930 
 127.335778 36.057778 338.034042 
 127.335778 36.057889 337.027340 
 127.335778 36.058000 332.827759 
 127.335889 36.058000 356.664548 
 127.335889 36.058111 355.805853 
 127.335889 36.058222 350.433050 
 127.336000 36.058222 365.756989 
 127.336000 36.058333 364.110132 
 127.336000 36.058444 361.028616 
 127.336000 36.058556 359.399652 
 127.336111 36.058556 378.793411 
 127.336111 36.058667 379.024229 
 127.336111 36.058778 378.619251 
 127.336222 36.058778 388.915076 
 127.336222 36.058889 387.131905 
 127.336222 36.059000 384.105714 
 127.336333 36.059000 395.922533 
 127.336333 36.059111 393.510343 
 127.336333 36.059222 387.909799 
 127.336444 36.059222 397.375315 
 127.336444 36.059333 394.280298 
 127.336444 36.059444 386.351311 
 127.336556 36.059444 388.860761 
 127.336556 36.059556 372.152125 
 127.336556 36.059667 339.697396 
 127.336667 36.059778 318.227942 
 127.336667 36.059889 309.293076 
 127.336667 36.060000 305.999559 
 127.336778 36.060000 308.040277 
 127.336778 36.060111 301.598497 
 127.336778 36.060222 294.541295 
 127.336889 36.060222 289.196263 
 127.336889 36.060333 282.647463 
 127.336889 36.060444 273.542266 
 127.337000 36.060444 282.261689 
 127.337000 36.060556 276.245599 
 127.337000 36.060667 265.014950 
 127.337111 36.060667 263.670763 
 127.337111 36.060778 255.806185 
 127.337111 36.060889 250.034535 
 127.337222 36.060889 253.386852 
 127.337222 36.061000 252.109700 
 127.337222 36.061111 251.211666 
 127.337333 36.061222 258.880122 
 127.337333 36.061333 259.336197 
 127.337333 36.061444 259.390774 
 127.337444 36.061444 268.696466 
 127.337444 36.061556 268.152288 
 127.337444 36.061667 268.807537 
 127.337556 36.061667 274.080540 
 127.337556 36.061778 276.345822 
 127.337556 36.061889 281.843524 
 127.337667 36.061889 284.283444 
 127.337667 36.062000 290.404499 
 127.337667 36.062111 297.300776 
 127.337778 36.062111 293.546958 
 127.337778 36.062222 293.017265 
 127.337778 36.062333 290.075167 
 127.337889 36.062333 281.340494 
 127.337889 36.062444 276.956131 
 127.337889 36.062556 268.817294 
 127.338000 36.062556 272.662584 
 127.338000 36.062667 261.629649 
 127.338000 36.062778 246.120337 
 127.338000 36.062889 233.277329 
 127.338111 36.062889 241.185412 
 127.338111 36.063000 228.716959 
 127.338111 36.063111 217.783086 
 127.338222 36.063111 226.372495 
 127.338222 36.063222 209.588899 
 127.338222 36.063333 194.730236 
 127.338333 36.063333 206.998832 
 127.338333 36.063444 191.894045 
 127.338333 36.063556 181.768571 
 127.338444 36.063556 192.418249 
 127.338444 36.063667 184.268166 
 127.338444 36.063778 175.259361 
 127.338556 36.063778 188.446829 
 127.338556 36.063889 180.234993 
 127.338556 36.064000 168.956755 
 127.338667 36.064000 177.565843 
 127.338667 36.064111 165.225001 
 127.338667 36.064222 154.195783 
 127.338667 36.064333 147.492537 
 127.338778 36.064333 152.111907 
 127.338778 36.064444 147.948624 
 127.338778 36.064556 145.055324 
 127.338889 36.064556 150.759864 
 127.338889 36.064667 147.062550 
 127.338889 36.064778 143.602762 
 127.339000 36.064778 146.306008 
 127.339000 36.064889 142.912280 
 127.339000 36.065000 140.752797 
 127.339111 36.065000 142.357692 
 127.339111 36.065111 141.187477 
 127.339111 36.065222 140.137985 
 127.339222 36.065222 141.644511 
 127.339222 36.065333 140.581530 
 127.339222 36.065445 139.326480 
 127.339333 36.065445 140.504347 
 127.339333 36.065556 139.510494 
 127.339333 36.065667 139.174829 
 127.339333 36.065778 140.079918 
 127.339444 36.065778 138.675812 
 127.339444 36.065889 139.971814 
 127.339444 36.066000 142.636448 
 127.339556 36.066000 137.098006 
 127.339556 36.066111 138.715011 
 127.339556 36.066222 142.682287 
 127.339667 36.066222 139.942912 
 127.339667 36.066333 147.328763 
 127.339667 36.066445 158.651832 
 127.339778 36.066445 156.113208 
 127.339778 36.066556 164.269573 
 127.339778 36.066667 168.440653 
 127.339889 36.066667 161.053913 
 127.339889 36.066778 164.260220 
 127.339889 36.066889 166.348513 
 127.340000 36.066889 153.481348 
 127.340000 36.067000 156.049140 
 127.340000 36.067111 160.598283 
 127.340111 36.067222 153.920347 
 127.340111 36.067333 157.886897 
 127.340111 36.067445 161.254460 
 127.340222 36.067445 154.604918 
 127.340222 36.067556 156.227771 
 127.340222 36.067667 158.575783 
 127.340333 36.067667 154.986208 
 127.340333 36.067778 156.572493 
 127.340333 36.067889 159.579619 
 127.340444 36.067889 154.895602 
 127.340444 36.068000 158.038099 
 127.340444 36.068111 162.768478 
 127.340556 36.068111 155.415352 
 127.340556 36.068222 157.471847 
 127.340556 36.068333 160.734852 
 127.340667 36.068333 155.306660 
 127.340667 36.068444 157.246119 
 127.340667 36.068555 160.314009 
 127.340778 36.068555 158.580304 
 127.340778 36.068667 160.305395 
 127.340778 36.068778 161.258335 
 127.340778 36.068889 162.014860 
 127.340889 36.068889 160.108100 
 127.340889 36.069000 160.706024 
 127.340889 36.069111 161.366782 
 127.341000 36.069111 157.204471 
 127.341000 36.069222 158.133289 
 127.341000 36.069333 159.036542 
 127.341111 36.069333 156.604134 
 127.341111 36.069444 158.714705 
 127.341111 36.069555 162.164330 
 127.341222 36.069555 157.709161 
 127.341222 36.069667 160.901528 
 127.341222 36.069778 166.803445 
 127.341333 36.069778 157.414805 
 127.341333 36.069889 159.345723 
 127.341333 36.070000 162.293234 
 127.341444 36.070000 158.995185 
 127.341444 36.070111 160.675861 
 127.341444 36.070222 164.637524 
 127.341444 36.070333 170.372314 
 127.341556 36.070333 168.352675 
 127.341556 36.070444 171.215244 
 127.341556 36.070555 172.169748 
 127.341667 36.070555 169.343783 
 127.341667 36.070667 169.551588 
 127.341667 36.070778 168.806260 
 127.341778 36.070778 161.255148 
 127.341778 36.070889 161.279898 
 127.341778 36.071000 161.676381 
 127.341889 36.071000 160.419988 
 127.341889 36.071111 161.377370 
 127.341889 36.071222 162.521117 
 127.342000 36.071222 163.135139 
 127.342000 36.071333 163.741802 
 127.342000 36.071444 164.050567 
 127.342111 36.071444 164.801011 
 127.342111 36.071556 165.060900 
 127.342111 36.071667 165.837373 
 127.342111 36.071778 167.465295 
 127.342222 36.071778 170.439495 
 127.342222 36.071889 170.815893 
 127.342222 36.072000 171.176256 
 127.342333 36.072000 172.517545 
 127.342333 36.072111 172.314861 
 127.342333 36.072222 172.611190 
 127.342444 36.072222 177.101753 
 127.342444 36.072333 177.837123 
 127.342444 36.072444 180.170560 
 127.342556 36.072444 180.597910 
 127.342556 36.072556 183.261355 
 127.342556 36.072667 185.673897 
 127.342667 36.072667 188.668619 
 127.342667 36.072778 191.667074 
 127.342667 36.072889 194.605720 
 127.342778 36.072889 203.146314 
 127.342778 36.073000 205.402608 
 127.342778 36.073111 207.609567 
 127.342778 36.073222 210.560369 
 127.342889 36.073222 208.526658 
 127.342889 36.073333 212.165346 
 127.342889 36.073444 220.146494 
 127.343000 36.073444 218.210878 
 127.343000 36.073556 231.977240 
 127.343000 36.073667 244.266157 
 127.343111 36.073667 247.832953 
 127.343111 36.073778 254.244786 
 127.343111 36.073889 256.728202 
 127.343222 36.073889 257.363795 
 127.343222 36.074000 259.282088 
 127.343222 36.074111 260.814622 
 127.343333 36.074111 264.166422 
 127.343333 36.074222 267.875481 
 127.343333 36.074333 272.285033 
 127.343444 36.074333 286.318131 
 127.343444 36.074444 290.016284 
 127.343444 36.074556 295.305367 
 127.343444 36.074667 301.251262 
 127.343556 36.074667 303.670196 
 127.343556 36.074778 308.223917 
 127.343556 36.074889 310.339540 
 127.343667 36.074889 310.684679 
 127.343667 36.075000 311.506343 
 127.343667 36.075111 312.110135 
 127.343778 36.075111 312.233717 
 127.343778 36.075222 314.133367 
 127.343778 36.075333 320.677884 
 127.343889 36.075333 317.969477 
 127.343889 36.075444 328.529660 
 127.343889 36.075556 339.640169 
 127.344000 36.075556 337.418741 
 127.344000 36.075667 344.422440 
 127.344000 36.075778 346.787474 
 127.344000 36.075889 347.463012 
 127.344111 36.075889 345.918988 
 127.344111 36.076000 347.560938 
 127.344111 36.076111 348.605742 
 127.344222 36.076111 347.811296 
 127.344222 36.076222 349.738821 
 127.344222 36.076333 350.226195 
 127.344333 36.076333 349.287641 
 127.344333 36.076444 348.856157 
 127.344333 36.076556 344.909976 
 127.344444 36.076556 343.611405 
 127.344444 36.076667 338.396223 
 127.344444 36.076778 335.374567 
 127.344556 36.076778 335.559332 
 127.344556 36.076889 334.555200 
 127.344556 36.077000 333.008830 
 127.344667 36.077000 326.549827 
 127.344667 36.077111 322.058507 
 127.344667 36.077222 317.699937 
 127.344667 36.077333 314.126337 
 127.344778 36.077333 314.820626 
 127.344778 36.077444 315.020908 
 127.344778 36.077556 316.015818 
 127.344889 36.077556 322.232435 
 127.344889 36.077667 326.169003 
 127.344889 36.077778 329.698736 
 127.345000 36.077778 333.189551 
 127.345000 36.077889 333.290915 
 127.345000 36.078000 333.336761 
 127.345111 36.078000 337.607097 
 127.345111 36.078111 337.114795 
 127.345111 36.078222 338.170547 
 127.345222 36.078222 345.273646 
 127.345222 36.078333 345.914248 
 127.345222 36.078445 346.025354 
 127.345222 36.078556 345.595989 
 127.345333 36.078556 347.617605 
 127.345333 36.078667 344.296395 
 127.345333 36.078778 342.734437 
 127.345444 36.078778 344.388968 
 127.345444 36.078889 342.778980 
 127.345444 36.079000 342.025417 
 127.345556 36.079000 343.628211 
 127.345556 36.079111 343.007946 
 127.345556 36.079222 341.879455 
 127.345667 36.079222 343.389611 
 127.345667 36.079333 342.612746 
 127.345667 36.079445 340.606174 
 127.345667 36.079556 337.098475 
 127.345778 36.079556 339.928190 
 127.345778 36.079667 338.814520 
 127.345778 36.079778 338.106536 
 127.345889 36.079778 339.083900 
 127.345889 36.079889 338.948935 
 127.345889 36.080000 338.697862 
 127.346000 36.080000 336.067297 
 127.346000 36.080111 335.326144 
 127.346000 36.080222 332.152034 
 127.346000 36.080333 325.183214 
 127.346111 36.080333 309.306039 
 127.346111 36.080444 304.610124 
 127.346111 36.080556 302.323761 
 127.346222 36.080556 300.111550 
 127.346222 36.080667 299.794559 
 127.346222 36.080778 299.476172 
 127.346333 36.080778 296.896209 
 127.346333 36.080889 296.532502 
 127.346333 36.081000 295.645608 
 127.346333 36.081111 292.775414 
 127.346444 36.081111 282.454605 
 
