# Supplementary material for: Terrain Referenced Navigation Using a Multilayer Radial Basis Function-Based Extreme Learning Machine
Source: Hindawi journal article supplement (doi:10.1155/2019/9142694), 2019-07-11
Supplement: f1 [file 9142694.f1.zip › 9142694_Supplementary information files/CompareMatchingResults_180909/CIW_ELMTrainResult.dat]

127.173333 35.703000 363.091175 
 127.173444 35.703000 363.092716 
 127.173556 35.703000 363.103746 
 127.173667 35.703000 363.174481 
 127.173889 35.703000 365.419107 
 127.174111 35.703000 378.519793 
 127.174222 35.703000 382.838247 
 127.174333 35.703000 384.832602 
 127.174444 35.703000 388.324226 
 127.173444 35.703222 363.092874 
 127.173556 35.703222 363.104898 
 127.173667 35.703222 363.181977 
 127.173778 35.703222 363.615346 
 127.174000 35.703222 371.420034 
 127.174222 35.703222 383.014343 
 127.174333 35.703222 384.948359 
 127.174444 35.703222 387.958441 
 127.174556 35.703222 393.190357 
 127.173556 35.703445 363.104857 
 127.173667 35.703445 363.181713 
 127.173778 35.703445 363.613858 
 127.173889 35.703445 365.598238 
 127.174111 35.703445 378.893543 
 127.174333 35.703445 385.079507 
 127.174444 35.703445 388.313039 
 127.174556 35.703445 393.350699 
 127.174667 35.703445 396.701127 
 127.173667 35.703778 363.167474 
 127.173778 35.703778 363.533198 
 127.173889 35.703778 365.242461 
 127.174000 35.703778 370.544118 
 127.174222 35.703778 382.706172 
 127.174444 35.703778 388.299332 
 127.174556 35.703778 393.332545 
 127.174667 35.703778 396.524089 
 127.174778 35.703778 398.005088 
 127.173778 35.704000 363.445341 
 127.173889 35.704000 364.842910 
 127.174000 35.704000 369.480336 
 127.174111 35.704000 377.024551 
 127.174333 35.704000 384.668276 
 127.174556 35.704000 392.706715 
 127.174667 35.704000 396.194720 
 127.174778 35.704000 397.419242 
 127.174889 35.704000 397.412072 
 127.173889 35.700556 411.394307 
 127.174000 35.700556 411.463487 
 127.174111 35.700556 411.710985 
 127.174222 35.700556 412.477194 
 127.174444 35.700556 410.311067 
 127.174667 35.700556 408.385695 
 127.174778 35.700556 408.022661 
 127.174889 35.700556 407.326979 
 127.175000 35.700556 405.871919 
 127.173889 35.700667 411.424658 
 127.174000 35.700667 411.586256 
 127.174111 35.700667 412.158050 
 127.174222 35.700667 413.892586 
 127.174444 35.700667 412.878066 
 127.174667 35.700667 408.831471 
 127.174778 35.700667 408.098898 
 127.174889 35.700667 407.077960 
 127.175000 35.700667 405.487643 
 127.173889 35.700778 411.493187 
 127.174000 35.700778 411.860702 
 127.174111 35.700778 413.122153 
 127.174222 35.700778 416.630097 
 127.174444 35.700778 417.428662 
 127.174667 35.700778 409.828289 
 127.174778 35.700778 408.337517 
 127.174889 35.700778 406.808807 
 127.175000 35.700778 405.144634 
 127.174000 35.700778 411.860702 
 127.174111 35.700778 413.122153 
 127.174222 35.700778 416.630097 
 127.174333 35.700778 422.016088 
 127.174556 35.700778 412.189668 
 127.174778 35.700778 408.337517 
 127.174889 35.700778 406.808807 
 127.175000 35.700778 405.144634 
 127.175111 35.700778 404.302642 
 127.174000 35.700889 412.455142 
 127.174111 35.700889 415.057941 
 127.174222 35.700889 421.115303 
 127.174333 35.700889 428.169751 
 127.174556 35.700889 416.210427 
 127.174778 35.700889 408.912020 
 127.174889 35.700889 406.560206 
 127.175000 35.700889 404.857623 
 127.175111 35.700889 404.187245 
 127.174000 35.701000 413.671821 
 127.174111 35.701000 418.473190 
 127.174222 35.701000 426.821179 
 127.174333 35.701000 433.478299 
 127.174556 35.701000 421.944471 
 127.174778 35.701000 410.070636 
 127.174889 35.701000 406.390557 
 127.175000 35.701000 404.628040 
 127.175111 35.701000 404.061238 
 127.174000 35.701111 415.965224 
 127.174111 35.701111 423.444489 
 127.174222 35.701111 432.240670 
 127.174333 35.701111 437.012017 
 127.174556 35.701111 428.151785 
 127.174778 35.701111 412.055737 
 127.174889 35.701111 406.356945 
 127.175000 35.701111 404.438733 
 127.175111 35.701111 403.869744 
 127.174111 35.701111 423.444489 
 127.174222 35.701111 432.240670 
 127.174333 35.701111 437.012017 
 127.174444 35.701111 434.705164 
 127.174667 35.701111 420.405010 
 127.174889 35.701111 406.356945 
 127.175000 35.701111 404.438733 
 127.175111 35.701111 403.869744 
 127.175222 35.701111 403.204010 
 127.174111 35.701222 429.010761 
 127.174222 35.701222 436.149106 
 127.174333 35.701222 438.969785 
 127.174444 35.701222 437.601072 
 127.174667 35.701222 425.966733 
 127.174889 35.701222 406.498135 
 127.175000 35.701222 404.254476 
 127.175111 35.701222 403.507982 
 127.175222 35.701222 402.186200 
 127.174111 35.701333 433.760753 
 127.174222 35.701333 438.457423 
 127.174333 35.701333 439.866617 
 127.174444 35.701333 439.013495 
 127.174667 35.701333 430.610117 
 127.174889 35.701333 406.829606 
 127.175000 35.701333 404.011390 
 127.175111 35.701333 402.775035 
 127.175222 35.701333 400.239249 
 127.174111 35.701445 436.960330 
 127.174222 35.701445 439.573713 
 127.174333 35.701445 439.873329 
 127.174444 35.701445 439.058234 
 127.174667 35.701445 433.193485 
 127.174889 35.701445 407.361863 
 127.175000 35.701445 403.611105 
 127.175111 35.701445 401.349292 
 127.175222 35.701445 397.085917 
 127.174222 35.701445 439.573713 
 127.174333 35.701445 439.873329 
 127.174444 35.701445 439.058234 
 127.174556 35.701445 437.715243 
 127.174778 35.701445 420.542247 
 127.175000 35.701445 403.611105 
 127.175111 35.701445 401.349292 
 127.175222 35.701445 397.085917 
 127.175333 35.701445 391.349165 
 127.174222 35.701556 439.697389 
 127.174333 35.701556 438.398755 
 127.174444 35.701556 437.018917 
 127.174556 35.701556 436.807261 
 127.174778 35.701556 421.032866 
 127.175000 35.701556 402.947982 
 127.175111 35.701556 398.914899 
 127.175222 35.701556 393.127980 
 127.175333 35.701556 387.978545 
 127.174222 35.701667 438.236903 
 127.174333 35.701667 433.611188 
 127.174444 35.701667 431.308718 
 127.174556 35.701667 432.737151 
 127.174778 35.701667 419.050418 
 127.175000 35.701667 402.065815 
 127.175111 35.701667 395.615182 
 127.175222 35.701667 389.487915 
 127.175333 35.701667 385.870728 
 127.174222 35.701778 433.204183 
 127.174333 35.701778 424.082601 
 127.174444 35.701778 421.934684 
 127.174556 35.701778 425.230798 
 127.174778 35.701778 416.125780 
 127.175000 35.701778 401.459736 
 127.175111 35.701778 392.536546 
 127.175222 35.701778 387.100954 
 127.175333 35.701778 384.850106 
 127.174333 35.701889 413.619495 
 127.174444 35.701889 412.960362 
 127.174556 35.701889 416.897570 
 127.174667 35.701889 417.353329 
 127.174889 35.701889 410.572799 
 127.175111 35.701889 391.077951 
 127.175222 35.701889 386.124017 
 127.175333 35.701889 384.599942 
 127.175444 35.701889 384.784725 
 127.174333 35.702000 407.225147 
 127.174444 35.702000 407.567079 
 127.174556 35.702000 410.977591 
 127.174667 35.702000 413.512006 
 127.174889 35.702000 410.948204 
 127.175111 35.702000 391.906926 
 127.175222 35.702000 386.411393 
 127.175333 35.702000 385.006323 
 127.175444 35.702000 385.986837 
 127.174333 35.702111 404.388770 
 127.174444 35.702111 405.031425 
 127.174556 35.702111 407.757391 
 127.174667 35.702111 411.267425 
 127.174889 35.702111 411.152698 
 127.175111 35.702111 394.802367 
 127.175222 35.702111 387.942559 
 127.175333 35.702111 386.220413 
 127.175444 35.702111 388.409994 
 127.174333 35.702222 403.021121 
 127.174444 35.702222 403.828068 
 127.174556 35.702222 406.001101 
 127.174667 35.702222 409.524269 
 127.174889 35.702222 411.206182 
 127.175111 35.702222 398.939733 
 127.175222 35.702222 390.827447 
 127.175333 35.702222 388.604506 
 127.175444 35.702222 392.442593 
 127.174444 35.702222 403.828068 
 127.174556 35.702222 406.001101 
 127.174667 35.702222 409.524269 
 127.174778 35.702222 411.143645 
 127.175000 35.702222 407.616719 
 127.175222 35.702222 390.827447 
 127.175333 35.702222 388.604506 
 127.175444 35.702222 392.442593 
 127.175556 35.702222 399.967945 
 127.174444 35.702333 402.913426 
 127.174556 35.702333 404.550879 
 127.174667 35.702333 407.355756 
 127.174778 35.702333 409.787057 
 127.175000 35.702333 409.309194 
 127.175222 35.702333 394.998626 
 127.175333 35.702333 392.488795 
 127.175444 35.702333 397.757393 
 127.175556 35.702333 404.749126 
 127.174444 35.702445 401.445241 
 127.174556 35.702445 402.771743 
 127.174667 35.702445 404.707306 
 127.174778 35.702445 407.748647 
 127.175000 35.702445 410.487190 
 127.175222 35.702445 399.811349 
 127.175333 35.702445 397.561107 
 127.175444 35.702445 402.966916 
 127.175556 35.702445 407.911844 
 127.174444 35.702556 398.642911 
 127.174556 35.702556 400.838397 
 127.174667 35.702556 402.436398 
 127.174778 35.702556 405.597043 
 127.175000 35.702556 411.217865 
 127.175222 35.702556 404.207642 
 127.175333 35.702556 402.580473 
 127.175444 35.702556 406.743832 
 127.175556 35.702556 409.591132 
 127.174556 35.702556 400.838397 
 127.174667 35.702556 402.436398 
 127.174778 35.702556 405.597043 
 127.174889 35.702556 410.271217 
 127.175111 35.702556 409.102287 
 127.175333 35.702556 402.580473 
 127.175444 35.702556 406.743832 
 127.175556 35.702556 409.591132 
 127.175667 35.702556 410.480739 
 127.174556 35.702667 399.204118 
 127.174667 35.702667 400.984453 
 127.174778 35.702667 403.988646 
 127.174889 35.702667 409.836005 
 127.175111 35.702667 410.579484 
 127.175333 35.702667 406.231395 
 127.175444 35.702667 408.813222 
 127.175556 35.702667 410.257958 
 127.175667 35.702667 410.278680 
 127.174556 35.702778 397.794625 
 127.174667 35.702778 400.072135 
 127.174778 35.702778 403.027546 
 127.174889 35.702778 409.536617 
 127.175111 35.702778 411.398808 
 127.175333 35.702778 407.930292 
 127.175444 35.702778 409.465381 
 127.175556 35.702778 410.178546 
 127.175667 35.702778 409.313056 
 127.174556 35.702889 396.293791 
 127.174667 35.702889 399.281179 
 127.174778 35.702889 402.460742 
 127.174889 35.702889 409.352409 
 127.175111 35.702889 411.751618 
 127.175333 35.702889 407.606965 
 127.175444 35.702889 408.859518 
 127.175556 35.702889 409.277962 
 127.175667 35.702889 407.092479 
 127.174667 35.702889 399.281179 
 127.174778 35.702889 402.460742 
 127.174889 35.702889 409.352409 
 127.175000 35.702889 412.038631 
 127.175222 35.702889 409.409889 
 127.175444 35.702889 408.859518 
 127.175556 35.702889 409.277962 
 127.175667 35.702889 407.092479 
 127.175778 35.702889 399.853672 
 127.174667 35.703000 398.383718 
 127.174778 35.703000 401.995645 
 127.174889 35.703000 409.119241 
 127.175000 35.703000 412.044102 
 127.175222 35.703000 408.306059 
 127.175444 35.703000 406.783716 
 127.175556 35.703000 407.142994 
 127.175667 35.703000 402.990449 
 127.175778 35.703000 393.079229 
 127.174667 35.703111 397.506461 
 127.174778 35.703111 401.436677 
 127.174889 35.703111 408.631103 
 127.175000 35.703111 411.825785 
 127.175222 35.703111 406.127529 
 127.175444 35.703111 403.006627 
 127.175556 35.703111 403.273786 
 127.175667 35.703111 397.008682 
 127.175778 35.703111 386.881019 
 127.174667 35.703222 396.962121 
 127.174778 35.703222 400.791101 
 127.174889 35.703222 407.765204 
 127.175000 35.703222 411.230254 
 127.175222 35.703222 403.400359 
 127.175444 35.703222 398.178089 
 127.175556 35.703222 397.935051 
 127.175667 35.703222 390.620991 
 127.175778 35.703222 382.676516 
 127.174778 35.703222 400.791101 
 127.174889 35.703222 407.765204 
 127.175000 35.703222 411.230254 
 127.175111 35.703222 410.366129 
 127.175333 35.703222 397.050449 
 127.175556 35.703222 397.935051 
 127.175667 35.703222 390.620991 
 127.175778 35.703222 382.676516 
 127.175889 35.703222 379.299396 
 127.174778 35.703333 400.144839 
 127.174889 35.703333 406.445108 
 127.175000 35.703333 409.999452 
 127.175111 35.703333 408.869601 
 127.175333 35.703333 393.750499 
 127.175556 35.703333 392.649846 
 127.175667 35.703333 385.675055 
 127.175778 35.703333 380.337054 
 127.175889 35.703333 378.469548 
 127.174778 35.703445 399.528608 
 127.174889 35.703445 404.626526 
 127.175000 35.703445 407.829034 
 127.175111 35.703445 406.580841 
 127.175333 35.703445 391.638378 
 127.175556 35.703445 388.800801 
 127.175667 35.703445 382.646503 
 127.175778 35.703445 379.105992 
 127.175889 35.703445 377.881499 
 127.174778 35.703556 398.953250 
 127.174889 35.703556 402.485863 
 127.175000 35.703556 404.798265 
 127.175111 35.703556 403.564392 
 127.175333 35.703556 390.347847 
 127.175556 35.703556 386.416034 
 127.175667 35.703556 380.914849 
 127.175778 35.703556 378.334528 
 127.175889 35.703556 377.150686 
 127.174889 35.703556 402.485863 
 127.175000 35.703556 404.798265 
 127.175111 35.703556 403.564392 
 127.175222 35.703556 395.381051 
 127.175444 35.703556 389.300394 
 127.175667 35.703556 380.914849 
 127.175778 35.703556 378.334528 
 127.175889 35.703556 377.150686 
 127.176000 35.703556 374.737891 
 127.174889 35.703667 400.460190 
 127.175000 35.703667 401.677707 
 127.175111 35.703667 400.334924 
 127.175222 35.703667 393.243998 
 127.175444 35.703667 388.102060 
 127.175667 35.703667 379.620307 
 127.175778 35.703667 377.523764 
 127.175889 35.703667 375.842924 
 127.176000 35.703667 371.529200 
 127.174889 35.703778 398.948357 
 127.175000 35.703778 399.292981 
 127.175111 35.703778 397.444612 
 127.175222 35.703778 391.149791 
 127.175444 35.703778 386.702261 
 127.175667 35.703778 378.008498 
 127.175778 35.703778 376.200991 
 127.175889 35.703778 373.431770 
 127.176000 35.703778 366.890244 
 127.174889 35.703889 397.993901 
 127.175000 35.703889 397.702294 
 127.175111 35.703889 394.745688 
 127.175222 35.703889 388.570102 
 127.175444 35.703889 384.480559 
 127.175667 35.703889 375.542088 
 127.175778 35.703889 373.904561 
 127.175889 35.703889 369.597253 
 127.176000 35.703889 361.892190 
 127.175000 35.703889 397.702294 
 127.175111 35.703889 394.745688 
 127.175222 35.703889 388.570102 
 127.175333 35.703889 386.609022 
 127.175556 35.703889 379.541574 
 127.175778 35.703889 373.904561 
 127.175889 35.703889 369.597253 
 127.176000 35.703889 361.892190 
 127.176111 35.703889 356.195532 
 127.175000 35.704000 396.433359 
 127.175111 35.704000 391.612317 
 127.175222 35.704000 385.424267 
 127.175333 35.704000 384.040697 
 127.175556 35.704000 375.665673 
 127.175778 35.704000 370.639403 
 127.175889 35.704000 364.981966 
 127.176000 35.704000 358.003570 
 127.176111 35.704000 354.538224 
 127.175000 35.704111 394.847430 
 127.175111 35.704111 387.846497 
 127.175222 35.704111 382.544508 
 127.175333 35.704111 381.200940 
 127.175556 35.704111 371.956938 
 127.175778 35.704111 367.314532 
 127.175889 35.704111 361.022869 
 127.176000 35.704111 355.681363 
 127.176111 35.704111 353.737015 
 127.175000 35.704222 392.349498 
 127.175111 35.704222 384.266704 
 127.175222 35.704222 380.641239 
 127.175333 35.704222 378.955802 
 127.175556 35.704222 369.326589 
 127.175778 35.704222 364.994978 
 127.175889 35.704222 358.585771 
 127.176000 35.704222 354.544643 
 127.176111 35.704222 353.375300 
 127.175111 35.704222 384.266704 
 127.175222 35.704222 380.641239 
 127.175333 35.704222 378.955802 
 127.175444 35.704222 373.935205 
 127.175667 35.704222 367.559300 
 127.175889 35.704222 358.585771 
 127.176000 35.704222 354.544643 
 127.176111 35.704222 353.375300 
 127.176222 35.704222 352.910767 
 127.175111 35.704333 381.751151 
 127.175222 35.704333 379.577042 
 127.175333 35.704333 377.416878 
 127.175444 35.704333 371.645248 
 127.175667 35.704333 366.563806 
 127.175889 35.704333 357.469575 
 127.176000 35.704333 354.100938 
 127.176111 35.704333 353.217116 
 127.176222 35.704333 352.583960 
 127.175111 35.704444 380.319797 
 127.175222 35.704444 378.896778 
 127.175333 35.704444 376.119628 
 127.175444 35.704444 370.217182 
 127.175667 35.704444 366.101257 
 127.175889 35.704444 357.123876 
 127.176000 35.704444 354.051537 
 127.176111 35.704444 353.140173 
 127.176222 35.704444 351.946864 
 127.175111 35.704555 379.531997 
 127.175222 35.704555 378.169387 
 127.175333 35.704555 374.587421 
 127.175444 35.704555 369.371413 
 127.175667 35.704555 365.846337 
 127.175889 35.704555 357.106652 
 127.176000 35.704555 354.262732 
 127.176111 35.704555 353.071977 
 127.176222 35.704555 350.820095 
 127.175222 35.704555 378.169387 
 127.175333 35.704555 374.587421 
 127.175444 35.704555 369.371413 
 127.175556 35.704555 366.921069 
 127.175778 35.704555 362.956985 
 127.176000 35.704555 354.262732 
 127.176111 35.704555 353.071977 
 127.176222 35.704555 350.820095 
 127.176333 35.704555 346.559428 
 127.175222 35.704667 376.947417 
 127.175333 35.704667 372.732711 
 127.175444 35.704667 368.953196 
 127.175556 35.704667 366.923236 
 127.175778 35.704667 362.371060 
 127.176000 35.704667 354.640113 
 127.176111 35.704667 352.959195 
 127.176222 35.704667 349.308843 
 127.176333 35.704667 344.699267 
 127.175222 35.704778 374.944756 
 127.175333 35.704778 371.085217 
 127.175444 35.704778 368.783033 
 127.175556 35.704778 366.848016 
 127.175778 35.704778 361.258003 
 127.176000 35.704778 355.031334 
 127.176111 35.704778 352.785055 
 127.176222 35.704778 347.896380 
 127.176333 35.704778 343.603395 
 127.175222 35.704889 372.624820 
 127.175333 35.704889 370.063223 
 127.175444 35.704889 368.584822 
 127.175556 35.704889 366.242289 
 127.175778 35.704889 359.577868 
 127.176000 35.704889 355.295625 
 127.176111 35.704889 352.579248 
 127.176222 35.704889 346.917353 
 127.176333 35.704889 343.044102 
 127.175333 35.704889 370.063223 
 127.175444 35.704889 368.584822 
 127.175556 35.704889 366.242289 
 127.175667 35.704889 362.976716 
 127.175889 35.704889 356.728313 
 127.176111 35.704889 352.579248 
 127.176222 35.704889 346.917353 
 127.176333 35.704889 343.044102 
 127.176444 35.704889 341.964698 
 127.175333 35.705000 369.492181 
 127.175444 35.705000 368.077141 
 127.175556 35.705000 364.660637 
 127.175667 35.705000 360.123969 
 127.175889 35.705000 356.425217 
 127.176111 35.705000 352.372382 
 127.176222 35.705000 346.327359 
 127.176333 35.705000 342.736511 
 127.176444 35.705000 341.776448 
 127.175333 35.705111 368.992285 
 127.175444 35.705111 366.962868 
 127.175556 35.705111 362.003736 
 127.175667 35.705111 357.094273 
 127.175889 35.705111 356.116804 
 127.176111 35.705111 352.152953 
 127.176222 35.705111 345.937454 
 127.176333 35.705111 342.469475 
 127.176444 35.705111 341.418550 
 127.175333 35.705222 368.199180 
 127.175444 35.705222 364.911658 
 127.175556 35.705222 358.810374 
 127.175667 35.705222 354.886026 
 127.175889 35.705222 355.777972 
 127.176111 35.705222 351.846163 
 127.176222 35.705222 345.564721 
 127.176333 35.705222 342.037229 
 127.176444 35.705222 340.593582 
 127.175444 35.705222 364.911658 
 127.175556 35.705222 358.810374 
 127.175667 35.705222 354.886026 
 127.175778 35.705222 354.828186 
 127.176000 35.705222 355.233741 
 127.176222 35.705222 345.564721 
 127.176333 35.705222 342.037229 
 127.176444 35.705222 340.593582 
 127.176556 35.705222 339.137955 
 127.175444 35.705333 361.843415 
 127.175556 35.705333 356.034438 
 127.175667 35.705333 353.660971 
 127.175778 35.705333 354.073555 
 127.176000 35.705333 354.793674 
 127.176222 35.705333 345.006977 
 127.176333 35.705333 341.139520 
 127.176444 35.705333 338.851663 
 127.176556 35.705333 336.180743 
 127.175444 35.705444 358.362718 
 127.175556 35.705444 354.220082 
 127.175667 35.705444 353.129680 
 127.175778 35.705444 353.716336 
 127.176000 35.705444 353.677531 
 127.176222 35.705444 343.983780 
 127.176333 35.705444 339.380755 
 127.176444 35.705444 335.936547 
 127.176556 35.705444 332.246570 
 127.175444 35.705555 355.540604 
 127.175556 35.705555 353.313213 
 127.175667 35.705555 353.074893 
 127.175778 35.705555 353.788736 
 127.176000 35.705555 351.472136 
 127.176222 35.705555 342.338664 
 127.176333 35.705555 336.710712 
 127.176444 35.705555 332.537286 
 127.176556 35.705555 328.701773 
 127.175556 35.705555 353.313213 
 127.175667 35.705555 353.074893 
 127.175778 35.705555 353.788736 
 127.175889 35.705555 353.923378 
 127.176111 35.705555 347.668568 
 127.176333 35.705555 336.710712 
 127.176444 35.705555 332.537286 
 127.176556 35.705555 328.701773 
 127.176667 35.705555 322.235077 
 127.175556 35.705667 353.050381 
 127.175667 35.705667 353.449870 
 127.175778 35.705667 354.320887 
 127.175889 35.705667 353.234110 
 127.176111 35.705667 345.066953 
 127.176333 35.705667 333.973104 
 127.176444 35.705667 329.841540 
 127.176556 35.705667 326.257472 
 127.176667 35.705667 319.809248 
 127.175556 35.705778 353.285268 
 127.175667 35.705778 354.258470 
 127.175778 35.705778 355.117709 
 127.175889 35.705778 352.961726 
 127.176111 35.705778 343.396862 
 127.176333 35.705778 332.220663 
 127.176444 35.705778 328.266631 
 127.176556 35.705778 324.708570 
 127.176667 35.705778 318.333970 
 127.175556 35.705889 353.982396 
 127.175667 35.705889 355.306601 
 127.175778 35.705889 355.817840 
 127.175889 35.705889 353.007090 
 127.176111 35.705889 342.706082 
 127.176333 35.705889 331.596902 
 127.176444 35.705889 327.517116 
 127.176556 35.705889 323.725017 
 127.176667 35.705889 317.521406 
 127.175667 35.705889 355.306601 
 127.175778 35.705889 355.817840 
 127.175889 35.705889 353.007090 
 127.176000 35.705889 346.351298 
 127.176222 35.705889 339.275290 
 127.176444 35.705889 327.517116 
 127.176556 35.705889 323.725017 
 127.176667 35.705889 317.521406 
 127.176778 35.705889 314.544749 
 127.175667 35.706000 356.219608 
 127.175778 35.706000 356.256945 
 127.175889 35.706000 353.146936 
 127.176000 35.706000 346.243792 
 127.176222 35.706000 339.313227 
 127.176444 35.706000 327.269166 
 127.176556 35.706000 323.194253 
 127.176667 35.706000 317.366454 
 127.176778 35.706000 315.123464 
 127.175667 35.706111 356.793970 
 127.175778 35.706111 356.476966 
 127.175889 35.706111 353.263420 
 127.176000 35.706111 346.383440 
 127.176222 35.706111 339.247428 
 127.176444 35.706111 327.401459 
 127.176556 35.706111 323.248031 
 127.176667 35.706111 318.179819 
 127.176778 35.706111 316.829081 
 127.175667 35.706222 357.084781 
 127.175778 35.706222 356.549442 
 127.175889 35.706222 353.309082 
 127.176000 35.706222 346.771085 
 127.176222 35.706222 338.806223 
 127.176444 35.706222 327.921889 
 127.176556 35.706222 324.205630 
 127.176667 35.706222 320.496019 
 127.176778 35.706222 320.194116 
 127.175778 35.706222 356.549442 
 127.175889 35.706222 353.309082 
 127.176000 35.706222 346.771085 
 127.176111 35.706222 342.656699 
 127.176333 35.706222 332.061443 
 127.176556 35.706222 324.205630 
 127.176667 35.706222 320.496019 
 127.176778 35.706222 320.194116 
 127.176889 35.706222 321.579419 
 127.175778 35.706333 356.484278 
 127.175889 35.706333 353.253275 
 127.176000 35.706333 347.619010 
 127.176111 35.706333 343.223639 
 127.176333 35.706333 331.759838 
 127.176556 35.706333 326.145987 
 127.176667 35.706333 324.162209 
 127.176778 35.706333 324.466582 
 127.176889 35.706333 325.175340 
 127.175778 35.706444 356.202205 
 127.175889 35.706444 353.088874 
 127.176000 35.706444 348.999536 
 127.176111 35.706444 344.379373 
 127.176333 35.706444 331.291974 
 127.176556 35.706444 328.229756 
 127.176667 35.706444 327.542328 
 127.176778 35.706444 327.590103 
 127.176889 35.706444 326.506559 
 127.175778 35.706555 355.563691 
 127.175889 35.706555 352.891549 
 127.176000 35.706555 350.391487 
 127.176111 35.706555 345.808090 
 127.176333 35.706555 331.072667 
 127.176556 35.706555 329.547874 
 127.176667 35.706555 329.433748 
 127.176778 35.706555 328.765214 
 127.176889 35.706555 325.655215 
 127.175889 35.706555 352.891549 
 127.176000 35.706555 350.391487 
 127.176111 35.706555 345.808090 
 127.176222 35.706555 336.556068 
 127.176444 35.706555 329.835626 
 127.176667 35.706555 329.433748 
 127.176778 35.706555 328.765214 
 127.176889 35.706555 325.655215 
 127.177000 35.706555 319.703886 
 127.175889 35.706667 352.766581 
 127.176000 35.706667 351.291275 
 127.176111 35.706667 346.960469 
 127.176222 35.706667 336.852200 
 127.176444 35.706667 330.208215 
 127.176667 35.706667 330.281147 
 127.176778 35.706667 328.625599 
 127.176889 35.706667 323.655851 
 127.177000 35.706667 317.935187 
 127.175889 35.706778 352.720837 
 127.176000 35.706778 351.730256 
 127.176111 35.706778 347.705362 
 127.176222 35.706778 337.917177 
 127.176444 35.706778 330.866799 
 127.176667 35.706778 331.054526 
 127.176778 35.706778 327.975253 
 127.176889 35.706778 321.579068 
 127.177000 35.706778 317.013334 
 127.175889 35.706889 352.709386 
 127.176000 35.706889 351.914861 
 127.176111 35.706889 348.246073 
 127.176222 35.706889 339.926221 
 127.176444 35.706889 332.254324 
 127.176667 35.706889 333.037763 
 127.176778 35.706889 327.896592 
 127.176889 35.706889 320.422363 
 127.177000 35.706889 317.152105 
 127.176000 35.706889 351.914861 
 127.176111 35.706889 348.246073 
 127.176222 35.706889 339.926221 
 127.176333 35.706889 334.535566 
 127.176556 35.706889 332.700184 
 127.176778 35.706889 327.896592 
 127.176889 35.706889 320.422363 
 127.177000 35.706889 317.152105 
 127.177111 35.706889 318.410920 
 127.176000 35.707000 351.989517 
 127.176111 35.707000 348.872418 
 127.176222 35.707000 342.950162 
 127.176333 35.707000 338.124210 
 127.176556 35.707000 336.210744 
 127.176778 35.707000 330.081330 
 127.176889 35.707000 321.030665 
 127.177000 35.707000 318.785479 
 127.177111 35.707000 322.809058 
 127.176000 35.707111 352.049191 
 127.176111 35.707111 349.803794 
 127.176222 35.707111 346.414300 
 127.176333 35.707111 342.702018 
 127.176556 35.707111 341.919314 
 127.176778 35.707111 335.587474 
 127.176889 35.707111 324.132617 
 127.177000 35.707111 322.683554 
 127.177111 35.707111 329.997688 
 127.176000 35.707222 352.187142 
 127.176111 35.707222 350.986823 
 127.176222 35.707222 349.464801 
 127.176333 35.707222 347.326133 
 127.176556 35.707222 348.386645 
 127.176778 35.707222 342.879178 
 127.176889 35.707222 330.112672 
 127.177000 35.707222 329.297901 
 127.177111 35.707222 338.190578 
 127.176111 35.707222 350.986823 
 127.176222 35.707222 349.464801 
 127.176333 35.707222 347.326133 
 127.176444 35.707222 345.103674 
 127.176667 35.707222 350.935165 
 127.176889 35.707222 330.112672 
 127.177000 35.707222 329.297901 
 127.177111 35.707222 338.190578 
 127.177222 35.707222 345.756165 
 127.176111 35.707333 352.133636 
 127.176222 35.707333 351.821564 
 127.176333 35.707333 351.562961 
 127.176444 35.707333 351.680625 
 127.176667 35.707333 354.301881 
 127.176889 35.707333 338.013204 
 127.177000 35.707333 337.287407 
 127.177111 35.707333 344.564546 
 127.177222 35.707333 349.006463 
 127.176111 35.707444 353.141530 
 127.176222 35.707444 353.932152 
 127.176333 35.707444 355.918283 
 127.176444 35.707444 358.363603 
 127.176667 35.707444 355.945007 
 127.176889 35.707444 345.424880 
 127.177000 35.707444 344.063182 
 127.177111 35.707444 348.300687 
 127.177222 35.707444 350.600408 
 127.176111 35.707556 354.230843 
 127.176222 35.707556 356.533231 
 127.176333 35.707556 360.899589 
 127.176444 35.707556 364.285894 
 127.176667 35.707556 356.839302 
 127.176889 35.707556 350.433002 
 127.177000 35.707556 348.319527 
 127.177111 35.707556 350.186428 
 127.177222 35.707556 351.429781 
 127.176222 35.707556 356.533231 
 127.176333 35.707556 360.899589 
 127.176444 35.707556 364.285894 
 127.176556 35.707556 360.594289 
 127.176778 35.707556 354.966316 
 127.177000 35.707556 348.319527 
 127.177111 35.707556 350.186428 
 127.177222 35.707556 351.429781 
 127.177333 35.707556 352.262821 
 127.176222 35.707667 360.183526 
 127.176333 35.707667 365.966599 
 127.176444 35.707667 368.592609 
 127.176556 35.707667 363.224912 
 127.176778 35.707667 355.767546 
 127.177000 35.707667 350.466526 
 127.177111 35.707667 351.118006 
 127.177222 35.707667 351.946611 
 127.177333 35.707667 352.421718 
 127.176222 35.707778 364.638899 
 127.176333 35.707778 369.952215 
 127.176444 35.707778 371.134334 
 127.176556 35.707778 365.374647 
 127.176778 35.707778 355.859677 
 127.177000 35.707778 351.195509 
 127.177111 35.707778 351.584615 
 127.177222 35.707778 352.275020 
 127.177333 35.707778 352.289920 
 127.176222 35.707889 368.753367 
 127.176333 35.707889 372.351161 
 127.176444 35.707889 372.224150 
 127.176556 35.707889 366.708492 
 127.176778 35.707889 355.420613 
 127.177000 35.707889 350.847427 
 127.177111 35.707889 351.707450 
 127.177222 35.707889 352.363220 
 127.177333 35.707889 351.751922 
 127.176333 35.707889 372.351161 
 127.176444 35.707889 372.224150 
 127.176556 35.707889 366.708492 
 127.176667 35.707889 359.270614 
 127.176889 35.707889 352.397765 
 127.177111 35.707889 351.707450 
 127.177222 35.707889 352.363220 
 127.177333 35.707889 351.751922 
 127.177444 35.707889 348.054838 
 127.176333 35.708000 373.434378 
 127.176444 35.708000 372.130579 
 127.176556 35.708000 366.970046 
 127.176667 35.708000 360.401463 
 127.176889 35.708000 350.688538 
 127.177111 35.708000 351.450554 
 127.177222 35.708000 352.126075 
 127.177333 35.708000 350.577326 
 127.177444 35.708000 344.273163 
 127.176333 35.708111 373.519287 
 127.176444 35.708111 370.992582 
 127.176556 35.708111 366.407916 
 127.176667 35.708111 361.275782 
 127.176889 35.708111 349.316272 
 127.177111 35.708111 350.847558 
 127.177222 35.708111 351.458088 
 127.177333 35.708111 348.375457 
 127.177444 35.708111 338.883810 
 127.176333 35.708222 372.700443 
 127.176444 35.708222 369.187656 
 127.176556 35.708222 365.662828 
 127.176667 35.708222 361.668140 
 127.176889 35.708222 348.648832 
 127.177111 35.708222 350.014030 
 127.177222 35.708222 350.164091 
 127.177333 35.708222 344.667778 
 127.177444 35.708222 332.649687 
 127.176444 35.708222 369.187656 
 127.176556 35.708222 365.662828 
 127.176667 35.708222 361.668140 
 127.176778 35.708222 353.424801 
 127.177000 35.708222 348.299208 
 127.177222 35.708222 350.164091 
 127.177333 35.708222 344.667778 
 127.177444 35.708222 332.649687 
 127.177556 35.708222 322.269229 
 127.176444 35.708333 367.442296 
 127.176556 35.708333 365.106068 
 127.176667 35.708333 361.662593 
 127.176778 35.708333 353.279311 
 127.177000 35.708333 348.006916 
 127.177222 35.708333 347.978657 
 127.177333 35.708333 339.398845 
 127.177444 35.708333 327.154771 
 127.177556 35.708333 320.137120 
 127.176444 35.708444 366.243552 
 127.176556 35.708444 364.729137 
 127.176667 35.708444 361.382829 
 127.176778 35.708444 353.544513 
 127.177000 35.708444 348.015157 
 127.177222 35.708444 344.820264 
 127.177333 35.708444 333.714605 
 127.177444 35.708444 323.664376 
 127.177556 35.708444 319.311146 
 127.176556 35.708444 364.729137 
 127.176667 35.708444 361.382829 
 127.176778 35.708444 353.544513 
 127.176889 35.708444 349.082280 
 127.177111 35.708444 348.167403 
 127.177333 35.708444 333.714605 
 127.177444 35.708444 323.664376 
 127.177556 35.708444 319.311146 
 127.177667 35.708444 317.903260 
 127.176556 35.708556 364.393479 
 127.176667 35.708556 360.941265 
 127.176778 35.708556 354.503956 
 127.176889 35.708556 350.347322 
 127.177111 35.708556 347.418458 
 127.177333 35.708556 329.755799 
 127.177444 35.708556 322.480307 
 127.177556 35.708556 319.494315 
 127.177667 35.708556 318.222205 
 127.176556 35.708667 363.951501 
 127.176667 35.708667 360.558957 
 127.176778 35.708667 356.167623 
 127.176889 35.708667 352.428346 
 127.177111 35.708667 347.022707 
 127.177333 35.708667 329.012070 
 127.177444 35.708667 323.396403 
 127.177556 35.708667 320.606524 
 127.177667 35.708667 318.838967 
 127.176556 35.708778 363.292628 
 127.176667 35.708778 360.495826 
 127.176778 35.708778 357.981658 
 127.176889 35.708778 354.916008 
 127.177111 35.708778 347.298455 
 127.177333 35.708778 331.162983 
 127.177444 35.708778 326.095275 
 127.177556 35.708778 322.703231 
 127.177667 35.708778 319.664099 
 127.176667 35.708778 360.495826 
 127.176778 35.708778 357.981658 
 127.176889 35.708778 354.916008 
 127.177000 35.708778 351.202591 
 127.177222 35.708778 338.904292 
 127.177444 35.708778 326.095275 
 127.177556 35.708778 322.703231 
 127.177667 35.708778 319.664099 
 127.177778 35.708778 316.158759 
 127.176667 35.708889 360.726033 
 127.176778 35.708889 359.365963 
 127.176889 35.708889 357.078710 
 127.177000 35.708889 353.504097 
 127.177222 35.708889 340.489205 
 127.177444 35.708889 330.008683 
 127.177556 35.708889 325.670854 
 127.177667 35.708889 320.442695 
 127.177778 35.708889 315.678777 
 127.176667 35.709000 361.005535 
 127.176778 35.709000 360.177596 
 127.176889 35.709000 358.449461 
 127.177000 35.709000 355.548639 
 127.177222 35.709000 342.479704 
 127.177444 35.709000 334.159246 
 127.177556 35.709000 328.937166 
 127.177667 35.709000 320.928182 
 127.177778 35.709000 315.375278 
 127.176667 35.709111 361.176238 
 127.176778 35.709111 360.488310 
 127.176889 35.709111 358.964675 
 127.177000 35.709111 356.716835 
 127.177222 35.709111 344.221864 
 127.177444 35.709111 337.524600 
 127.177556 35.709111 331.641119 
 127.177667 35.709111 321.191389 
 127.177778 35.709111 315.333182 
 127.176778 35.709111 360.488310 
 127.176889 35.709111 358.964675 
 127.177000 35.709111 356.716835 
 127.177111 35.709111 352.158552 
 127.177333 35.709111 340.473705 
 127.177556 35.709111 331.641119 
 127.177667 35.709111 321.191389 
 127.177778 35.709111 315.333182 
 127.177889 35.709111 313.966141 
 127.176778 35.709222 360.367141 
 127.176889 35.709222 358.846967 
 127.177000 35.709222 357.160085 
 127.177111 35.709222 353.427505 
 127.177333 35.709222 342.040283 
 127.177556 35.709222 333.361106 
 127.177667 35.709222 321.613676 
 127.177778 35.709222 315.670208 
 127.177889 35.709222 314.236792 
 127.176778 35.709333 359.870228 
 127.176889 35.709333 358.455767 
 127.177000 35.709333 357.266459 
 127.177111 35.709333 354.266544 
 127.177333 35.709333 343.114710 
 127.177556 35.709333 334.264050 
 127.177667 35.709333 322.660226 
 127.177778 35.709333 316.637535 
 127.177889 35.709333 314.921581 
 127.176778 35.709444 359.164732 
 127.176889 35.709444 358.079840 
 127.177000 35.709444 357.237453 
 127.177111 35.709444 354.785215 
 127.177333 35.709444 344.150635 
 127.177556 35.709444 334.716969 
 127.177667 35.709444 324.650398 
 127.177778 35.709444 318.607193 
 127.177889 35.709444 316.404405 
 127.176889 35.709444 358.079840 
 127.177000 35.709444 357.237453 
 127.177111 35.709444 354.785215 
 127.177222 35.709444 348.617046 
 127.177444 35.709444 341.378171 
 127.177667 35.709444 324.650398 
 127.177778 35.709444 318.607193 
 127.177889 35.709444 316.404405 
 127.178000 35.709444 317.156959 
 127.176889 35.709556 357.800099 
 127.177000 35.709556 357.105490 
 127.177111 35.709556 355.054223 
 127.177222 35.709556 350.335157 
 127.177444 35.709556 341.514636 
 127.177667 35.709556 327.399694 
 127.177778 35.709556 321.771466 
 127.177889 35.709556 319.064440 
 127.178000 35.709556 320.293158 
 127.176889 35.709667 357.559432 
 127.177000 35.709667 356.835083 
 127.177111 35.709667 355.123103 
 127.177222 35.709667 351.976628 
 127.177444 35.709667 341.500854 
 127.177667 35.709667 330.094731 
 127.177778 35.709667 325.524735 
 127.177889 35.709667 322.513656 
 127.178000 35.709667 323.296405 
 127.176889 35.709778 357.255222 
 127.177000 35.709778 356.404793 
 127.177111 35.709778 355.058694 
 127.177222 35.709778 353.149201 
 127.177444 35.709778 341.493061 
 127.177667 35.709778 332.026495 
 127.177778 35.709778 328.664629 
 127.177889 35.709778 325.409210 
 127.178000 35.709778 325.088944 
 127.177000 35.709778 356.404793 
 127.177111 35.709778 355.058694 
 127.177222 35.709778 353.149201 
 127.177333 35.709778 349.310100 
 127.177556 35.709778 335.128686 
 127.177778 35.709778 328.664629 
 127.177889 35.709778 325.409210 
 127.178000 35.709778 325.088944 
 127.178111 35.709778 325.734242 
 127.177000 35.709889 355.888383 
 127.177111 35.709889 354.915900 
 127.177222 35.709889 353.658256 
 127.177333 35.709889 350.394180 
 127.177556 35.709889 335.092896 
 127.177778 35.709889 330.489772 
 127.177889 35.709889 326.919823 
 127.178000 35.709889 325.843747 
 127.178111 35.709889 326.187317 
 127.177000 35.710000 355.411693 
 127.177111 35.710000 354.672985 
 127.177222 35.710000 353.461489 
 127.177333 35.710000 350.089849 
 127.177556 35.710000 334.954785 
 127.177778 35.710000 331.143808 
 127.177889 35.710000 327.347426 
 127.178000 35.710000 326.094294 
 127.178111 35.710000 326.751242 
 127.177000 35.710111 355.004353 
 127.177111 35.710111 354.201816 
 127.177222 35.710111 352.412950 
 127.177333 35.710111 348.165879 
 127.177556 35.710111 334.570660 
 127.177778 35.710111 330.979701 
 127.177889 35.710111 327.191303 
 127.178000 35.710111 326.133201 
 127.178111 35.710111 327.782795 
 127.177111 35.710111 354.201816 
 127.177222 35.710111 352.412950 
 127.177333 35.710111 348.165879 
 127.177444 35.710111 340.151621 
 127.177667 35.710111 333.196708 
 127.177889 35.710111 327.191303 
 127.178000 35.710111 326.133201 
 127.178111 35.710111 327.782795 
 127.178222 35.710111 334.183557 
 127.177111 35.710222 353.250635 
 127.177222 35.710222 350.261572 
 127.177333 35.710222 345.022658 
 127.177444 35.710222 338.570925 
 127.177667 35.710222 332.259888 
 127.177889 35.710222 326.640364 
 127.178000 35.710222 325.978469 
 127.178111 35.710222 329.476277 
 127.178222 35.710222 338.458016 
 127.177111 35.710333 351.452909 
 127.177222 35.710333 347.020814 
 127.177333 35.710333 341.768402 
 127.177444 35.710333 337.065453 
 127.177667 35.710333 330.834278 
 127.177889 35.710333 325.475390 
 127.178000 35.710333 325.275137 
 127.178111 35.710333 331.364180 
 127.178222 35.710333 341.401880 
 127.177111 35.710444 348.574756 
 127.177222 35.710444 343.449321 
 127.177333 35.710444 339.373642 
 127.177444 35.710444 336.016689 
 127.177667 35.710444 329.619924 
 127.177889 35.710444 323.121801 
 127.178000 35.710444 323.125068 
 127.178111 35.710444 332.003468 
 127.178222 35.710444 342.239718 
 127.177222 35.710444 343.449321 
 127.177333 35.710444 339.373642 
 127.177444 35.710444 336.016689 
 127.177556 35.710444 331.858214 
 127.177778 35.710444 327.679546 
 127.178000 35.710444 323.125068 
 127.178111 35.710444 332.003468 
 127.178222 35.710444 342.239718 
 127.178333 35.710444 346.492388 
 127.177222 35.710556 340.563930 
 127.177333 35.710556 337.962456 
 127.177444 35.710556 335.348767 
 127.177556 35.710556 331.242505 
 127.177778 35.710556 326.478964 
 127.178000 35.710556 318.705254 
 127.178111 35.710556 330.030009 
 127.178222 35.710556 340.994753 
 127.178333 35.710556 345.060973 
 127.177222 35.710667 338.762810 
 127.177333 35.710667 337.216503 
 127.177444 35.710667 334.872136 
 127.177556 35.710667 330.741938 
 127.177778 35.710667 325.260953 
 127.178000 35.710667 312.988181 
 127.178111 35.710667 325.333496 
 127.178222 35.710667 337.600510 
 127.178333 35.710667 341.553455 
 127.177222 35.710778 337.799941 
 127.177333 35.710778 336.801865 
 127.177444 35.710778 334.397160 
 127.177556 35.710778 330.149191 
 127.177778 35.710778 323.769005 
 127.178000 35.710778 308.024047 
 127.178111 35.710778 318.919476 
 127.178222 35.710778 331.693260 
 127.178333 35.710778 334.213466 
 127.177333 35.710778 336.801865 
 127.177444 35.710778 334.397160 
 127.177556 35.710778 330.149191 
 127.177667 35.710778 327.720819 
 127.177889 35.710778 311.016489 
 127.178111 35.710778 318.919476 
 127.178222 35.710778 331.693260 
 127.178333 35.710778 334.213466 
 127.178444 35.710778 320.675068 
 127.177333 35.710889 336.475682 
 127.177444 35.710889 333.677774 
 127.177556 35.710889 329.185418 
 127.177667 35.710889 326.695098 
 127.177889 35.710889 308.611833 
 127.178111 35.710889 312.379394 
 127.178222 35.710889 323.273684 
 127.178333 35.710889 321.727631 
 127.178444 35.710889 303.933767 
 127.177333 35.711000 335.988071 
 127.177444 35.711000 332.289790 
 127.177556 35.711000 327.533991 
 127.177667 35.711000 325.130312 
 127.177889 35.711000 307.636703 
 127.178111 35.711000 307.101875 
 127.178222 35.711000 313.680036 
 127.178333 35.711000 307.139006 
 127.178444 35.711000 293.193358 
 127.177444 35.711111 329.770847 
 127.177556 35.711111 325.305356 
 127.177667 35.711111 323.396885 
 127.177778 35.711111 319.193317 
 127.178000 35.711111 302.350044 
 127.178222 35.711111 305.509836 
 127.178333 35.711111 296.580613 
 127.178444 35.711111 288.727572 
 127.178556 35.711111 287.391025 
 127.177444 35.711222 326.479972 
 127.177556 35.711222 323.340848 
 127.177667 35.711222 322.166051 
 127.177778 35.711222 319.089959 
 127.178000 35.711222 302.655679 
 127.178222 35.711222 300.580370 
 127.178333 35.711222 291.625227 
 127.178444 35.711222 287.514938 
 127.178556 35.711222 288.140326 
 127.177444 35.711333 323.798121 
 127.177556 35.711333 322.208747 
 127.177667 35.711333 321.584102 
 127.177778 35.711333 319.491498 
 127.178000 35.711333 304.087951 
 127.178222 35.711333 299.319432 
 127.178333 35.711333 290.504196 
 127.178444 35.711333 287.896801 
 127.178556 35.711333 289.798925 
 127.177556 35.711333 322.208747 
 127.177667 35.711333 321.584102 
 127.177778 35.711333 319.491498 
 127.177889 35.711333 311.719235 
 127.178111 35.711333 302.625136 
 127.178333 35.711333 290.504196 
 127.178444 35.711333 287.896801 
 127.178556 35.711333 289.798925 
 127.178667 35.711333 293.862167 
 127.177556 35.711444 321.721157 
 127.177667 35.711444 321.374166 
 127.177778 35.711444 319.961596 
 127.177889 35.711444 314.311039 
 127.178111 35.711444 305.542234 
 127.178333 35.711444 292.270650 
 127.178444 35.711444 289.504541 
 127.178556 35.711444 292.092940 
 127.178667 35.711444 295.561599 
 127.177556 35.711556 321.529451 
 127.177667 35.711556 321.283526 
 127.177778 35.711556 320.280233 
 127.177889 35.711556 316.719856 
 127.178111 35.711556 310.971181 
 127.178333 35.711556 297.186885 
 127.178444 35.711556 292.386729 
 127.178556 35.711556 294.450172 
 127.178667 35.711556 296.510197 
 127.177556 35.711667 321.431946 
 127.177667 35.711667 321.176200 
 127.177778 35.711667 320.369655 
 127.177889 35.711667 318.413654 
 127.178111 35.711667 316.254236 
 127.178333 35.711667 304.587361 
 127.178444 35.711667 296.162056 
 127.178556 35.711667 296.228852 
 127.178667 35.711667 296.610975 
 127.177667 35.711667 321.176200 
 127.177778 35.711667 320.369655 
 127.177889 35.711667 318.413654 
 127.178000 35.711667 316.204791 
 127.178222 35.711667 314.882328 
 127.178444 35.711667 296.162056 
 127.178556 35.711667 296.228852 
 127.178667 35.711667 296.610975 
 127.178778 35.711667 293.917054 
 127.177667 35.711778 320.978543 
 127.177778 35.711778 320.249437 
 127.177889 35.711778 319.268471 
 127.178000 35.711778 318.664913 
 127.178222 35.711778 318.740923 
 127.178444 35.711778 299.844515 
 127.178556 35.711778 297.147233 
 127.178667 35.711778 295.719681 
 127.178778 35.711778 290.355588 
 127.177667 35.711889 320.668181 
 127.177778 35.711889 320.025019 
 127.177889 35.711889 319.561931 
 127.178000 35.711889 319.581618 
 127.178222 35.711889 320.213789 
 127.178444 35.711889 302.501020 
 127.178556 35.711889 297.083125 
 127.178667 35.711889 293.562884 
 127.178778 35.711889 286.072938 
 127.177667 35.712000 320.299957 
 127.177778 35.712000 319.811984 
 127.177889 35.712000 319.583465 
 127.178000 35.712000 319.666760 
 127.178222 35.712000 320.271152 
 127.178444 35.712000 303.381731 
 127.178556 35.712000 295.653076 
 127.178667 35.712000 290.121447 
 127.178778 35.712000 282.411513 
 127.177778 35.712000 319.811984 
 127.177889 35.712000 319.583465 
 127.178000 35.712000 319.666760 
 127.178111 35.712000 320.143443 
 127.178333 35.712000 316.822108 
 127.178556 35.712000 295.653076 
 127.178667 35.712000 290.121447 
 127.178778 35.712000 282.411513 
 127.178889 35.712000 278.558274 
 127.177778 35.712111 319.649841 
 127.177889 35.712111 319.433930 
 127.178000 35.712111 319.101393 
 127.178111 35.712111 318.940487 
 127.178333 35.712111 315.761321 
 127.178556 35.712111 292.315838 
 127.178667 35.712111 286.154021 
 127.178778 35.712111 279.977328 
 127.178889 35.712111 277.620044 
 127.177778 35.712222 319.506993 
 127.177889 35.712222 319.026683 
 127.178000 35.712222 317.488761 
 127.178111 35.712222 315.770387 
 127.178333 35.712222 311.838608 
 127.178556 35.712222 287.802940 
 127.178667 35.712222 282.896094 
 127.178778 35.712222 278.455734 
 127.178889 35.712222 276.682643 
 127.177778 35.712333 319.301955 
 127.177889 35.712333 318.049026 
 127.178000 35.712333 313.843915 
 127.178111 35.712333 309.276638 
 127.178333 35.712333 304.692731 
 127.178556 35.712333 284.247654 
 127.178667 35.712333 280.872750 
 127.178778 35.712333 276.944835 
 127.178889 35.712333 274.509281 
 127.177889 35.712333 318.049026 
 127.178000 35.712333 313.843915 
 127.178111 35.712333 309.276638 
 127.178222 35.712333 308.680650 
 127.178444 35.712333 290.401048 
 127.178667 35.712333 280.872750 
 127.178778 35.712333 276.944835 
 127.178889 35.712333 274.509281 
 127.179000 35.712333 269.276925 
 127.177889 35.712444 315.857144 
 127.178000 35.712444 307.111870 
 127.178111 35.712444 299.549878 
 127.178222 35.712444 298.602086 
 127.178444 35.712444 285.971797 
 127.178667 35.712444 279.607158 
 127.178778 35.712444 273.981339 
 127.178889 35.712444 269.372733 
 127.179000 35.712444 262.817712 
 127.177889 35.712556 311.468845 
 127.178000 35.712556 297.846191 
 127.178111 35.712556 289.780657 
 127.178222 35.712556 288.826037 
 127.178444 35.712556 283.200058 
 127.178667 35.712556 278.204962 
 127.178778 35.712556 268.670401 
 127.178889 35.712556 262.462067 
 127.179000 35.712556 258.660793 
 127.177889 35.712667 304.296628 
 127.178000 35.712667 289.038955 
 127.178111 35.712667 283.089044 
 127.178222 35.712667 282.210266 
 127.178444 35.712667 281.096503 
 127.178667 35.712667 276.037815 
 127.178778 35.712667 263.117198 
 127.178889 35.712667 257.856292 
 127.179000 35.712667 256.997093 
 127.178000 35.712667 289.038955 
 127.178111 35.712667 283.089044 
 127.178222 35.712667 282.210266 
 127.178333 35.712667 281.959436 
 127.178556 35.712667 280.537040 
 127.178778 35.712667 263.117198 
 127.178889 35.712667 257.856292 
 127.179000 35.712667 256.997093 
 127.179111 35.712667 256.961230 
 127.178000 35.712778 283.043630 
 127.178111 35.712778 279.448290 
 127.178222 35.712778 278.296685 
 127.178333 35.712778 277.237012 
 127.178556 35.712778 278.637642 
 127.178778 35.712778 259.506835 
 127.178889 35.712778 255.916085 
 127.179000 35.712778 256.429062 
 127.179111 35.712778 256.818709 
 127.178000 35.712889 279.695732 
 127.178111 35.712889 277.402819 
 127.178222 35.712889 275.291068 
 127.178333 35.712889 272.000411 
 127.178556 35.712889 274.248686 
 127.178778 35.712889 257.528512 
 127.178889 35.712889 255.208972 
 127.179000 35.712889 256.188042 
 127.179111 35.712889 256.572955 
 127.178111 35.712889 277.402819 
 127.178222 35.712889 275.291068 
 127.178333 35.712889 272.000411 
 127.178444 35.712889 273.095999 
 127.178667 35.712889 268.162899 
 127.178889 35.712889 255.208972 
 127.179000 35.712889 256.188042 
 127.179111 35.712889 256.572955 
 127.179222 35.712889 256.411412 
 127.178111 35.713000 275.667276 
 127.178222 35.713000 271.660966 
 127.178333 35.713000 265.753464 
 127.178444 35.713000 265.517776 
 127.178667 35.713000 262.388361 
 127.178889 35.713000 254.922632 
 127.179000 35.713000 255.928324 
 127.179111 35.713000 256.056043 
 127.179222 35.713000 255.687452 
 127.178111 35.713111 273.204942 
 127.178222 35.713111 266.733672 
 127.178333 35.713111 259.933847 
 127.178444 35.713111 258.775401 
 127.178667 35.713111 257.492037 
 127.178889 35.713111 254.692701 
 127.179000 35.713111 255.457386 
 127.179111 35.713111 255.320059 
 127.179222 35.713111 254.876741 
 127.178111 35.713222 269.290261 
 127.178222 35.713222 261.389047 
 127.178333 35.713222 256.068294 
 127.178444 35.713222 255.076440 
 127.178667 35.713222 254.892080 
 127.178889 35.713222 254.337107 
 127.179000 35.713222 254.869596 
 127.179111 35.713222 254.725097 
 127.179222 35.713222 254.348456 
 127.178222 35.713222 261.389047 
 127.178333 35.713222 256.068294 
 127.178444 35.713222 255.076440 
 127.178556 35.713222 255.556684 
 127.178778 35.713222 254.212673 
 127.179000 35.713222 254.869596 
 127.179111 35.713222 254.725097 
 127.179222 35.713222 254.348456 
 127.179333 35.713222 253.770520 
 127.178222 35.713333 257.187681 
 127.178333 35.713333 254.059460 
 127.178444 35.713333 253.545134 
 127.178556 35.713333 253.939679 
 127.178778 35.713333 253.708093 
 127.179000 35.713333 254.425475 
 127.179111 35.713333 254.396548 
 127.179222 35.713333 254.064780 
 127.179333 35.713333 253.663756 
 127.178222 35.713444 254.694398 
 127.178333 35.713444 253.147844 
 127.178444 35.713444 252.973775 
 127.178556 35.713444 253.350312 
 127.178778 35.713444 253.489813 
 127.179000 35.713444 254.135920 
 127.179111 35.713444 254.201603 
 127.179222 35.713444 253.892784 
 127.179333 35.713444 253.653983 
 127.178222 35.713556 253.447682 
 127.178333 35.713556 252.752350 
 127.178444 35.713556 252.743997 
 127.178556 35.713556 253.069277 
 127.178778 35.713556 253.353870 
 127.179000 35.713556 253.910715 
 127.179111 35.713556 254.027741 
 127.179222 35.713556 253.790057 
 127.179333 35.713556 253.739157 
 127.178333 35.713556 252.752350 
 127.178444 35.713556 252.743997 
 127.178556 35.713556 253.069277 
 127.178667 35.713556 253.244696 
 127.178889 35.713556 253.621013 
 127.179111 35.713556 254.027741 
 127.179222 35.713556 253.790057 
 127.179333 35.713556 253.739157 
 127.179444 35.713556 254.079200 
 127.178333 35.713667 252.577110 
 127.178444 35.713667 252.608020 
 127.178556 35.713667 252.819179 
 127.178667 35.713667 252.978499 
 127.178889 35.713667 253.561689 
 127.179111 35.713667 253.857755 
 127.179222 35.713667 253.777106 
 127.179333 35.713667 253.962139 
 127.179444 35.713667 254.521246 
 127.178333 35.713778 252.484098 
 127.178444 35.713778 252.471056 
 127.178556 35.713778 252.546680 
 127.178667 35.713778 252.662935 
 127.178889 35.713778 253.507338 
 127.179111 35.713778 253.729350 
 127.179222 35.713778 253.889598 
 127.179333 35.713778 254.353528 
 127.179444 35.713778 255.008527 
 127.178333 35.713889 252.406796 
 127.178444 35.713889 252.324617 
 127.178556 35.713889 252.320887 
 127.178667 35.713889 252.390969 
 127.178889 35.713889 253.416633 
 127.179111 35.713889 253.632603 
 127.179222 35.713889 254.117924 
 127.179333 35.713889 254.818158 
 127.179444 35.713889 255.365431 
 127.178444 35.713889 252.324617 
 127.178556 35.713889 252.320887 
 127.178667 35.713889 252.390969 
 127.178778 35.713889 252.774869 
 127.179000 35.713889 253.556660 
 127.179222 35.713889 254.117924 
 127.179333 35.713889 254.818158 
 127.179444 35.713889 255.365431 
 127.179556 35.713889 255.716174 
 127.178444 35.714000 252.208335 
 127.178556 35.714000 252.184499 
 127.178667 35.714000 252.206321 
 127.178778 35.714000 252.519990 
 127.179000 35.714000 253.389051 
 127.179222 35.714000 254.290667 
 127.179333 35.714000 255.105999 
 127.179444 35.714000 255.504435 
 127.179556 35.714000 255.817450 
 127.178444 35.714111 252.138379 
 127.178556 35.714111 252.104253 
 127.178667 35.714111 252.048375 
 127.178778 35.714111 252.153358 
 127.179000 35.714111 253.035163 
 127.179222 35.714111 254.085120 
 127.179333 35.714111 254.998581 
 127.179444 35.714111 255.412327 
 127.179556 35.714111 255.882209 
 127.178556 35.714111 252.104253 
 127.178667 35.714111 252.048375 
 127.178778 35.714111 252.153358 
 127.178889 35.714111 252.794909 
 127.179111 35.714111 253.118386 
 127.179333 35.714111 254.998581 
 127.179444 35.714111 255.412327 
 127.179556 35.714111 255.882209 
 127.179667 35.714111 256.525489 
 127.178556 35.714222 252.021275 
 127.178667 35.714222 251.801313 
 127.178778 35.714222 251.580822 
 127.178889 35.714222 252.138561 
 127.179111 35.714222 252.603421 
 127.179333 35.714222 254.413520 
 127.179444 35.714222 255.056056 
 127.179556 35.714222 255.905722 
 127.179667 35.714222 256.599734 
 127.178556 35.714333 251.856899 
 127.178667 35.714333 251.333827 
 127.178778 35.714333 250.876420 
 127.178889 35.714333 251.493867 
 127.179111 35.714333 252.168644 
 127.179333 35.714333 253.511836 
 127.179444 35.714333 254.443851 
 127.179556 35.714333 255.847008 
 127.179667 35.714333 256.590995 
 127.178556 35.714445 251.503171 
 127.178667 35.714445 250.658655 
 127.178778 35.714445 250.290674 
 127.178889 35.714445 251.042920 
 127.179111 35.714445 251.917056 
 127.179333 35.714445 252.712456 
 127.179444 35.714445 253.752653 
 127.179556 35.714445 255.656035 
 127.179667 35.714445 256.479089 
 127.178667 35.714445 250.658655 
 127.178778 35.714445 250.290674 
 127.178889 35.714445 251.042920 
 127.179000 35.714445 251.727356 
 127.179222 35.714445 252.198132 
 127.179444 35.714445 253.752653 
 127.179556 35.714445 255.656035 
 127.179667 35.714445 256.479089 
 127.179778 35.714445 256.345472 
 127.178667 35.714556 250.036022 
 127.178778 35.714556 249.925796 
 127.178889 35.714556 250.738449 
 127.179000 35.714556 251.527120 
 127.179222 35.714556 251.941590 
 127.179444 35.714556 253.143816 
 127.179556 35.714556 255.254097 
 127.179667 35.714556 256.176078 
 127.179778 35.714556 255.629196 
 127.178667 35.714667 249.650381 
 127.178778 35.714667 249.718308 
 127.178889 35.714667 250.500424 
 127.179000 35.714667 251.324069 
 127.179222 35.714667 251.752160 
 127.179444 35.714667 252.557903 
 127.179556 35.714667 254.481994 
 127.179667 35.714667 255.477779 
 127.179778 35.714667 254.295442 
 127.178667 35.714778 249.462086 
 127.178778 35.714778 249.597625 
 127.178889 35.714778 250.291629 
 127.179000 35.714778 251.039034 
 127.179222 35.714778 251.495954 
 127.179444 35.714778 251.843625 
 127.179556 35.714778 253.169486 
 127.179667 35.714778 254.137046 
 127.179778 35.714778 252.673844 
 127.178778 35.714778 249.597625 
 127.178889 35.714778 250.291629 
 127.179000 35.714778 251.039034 
 127.179111 35.714778 251.197701 
 127.179333 35.714778 251.657018 
 127.179556 35.714778 253.169486 
 127.179667 35.714778 254.137046 
 127.179778 35.714778 252.673844 
 127.179889 35.714778 251.024794 
 127.178778 35.714889 249.525618 
 127.178889 35.714889 250.101326 
 127.179000 35.714889 250.639780 
 127.179111 35.714889 250.697164 
 127.179333 35.714889 251.247023 
 127.179556 35.714889 251.468715 
 127.179667 35.714889 252.280772 
 127.179778 35.714889 251.426162 
 127.179889 35.714889 250.707719 
 127.178778 35.715000 249.490313 
 127.178889 35.715000 249.940581 
 127.179000 35.715000 250.229939 
 127.179111 35.715000 250.238333 
 127.179333 35.715000 250.661990 
 127.179556 35.715000 250.025901 
 127.179667 35.715000 250.663305 
 127.179778 35.715000 250.753302 
 127.179889 35.715000 250.612689 
 127.178889 35.715000 249.940581 
 127.179000 35.715000 250.229939 
 127.179111 35.715000 250.238333 
 127.179222 35.715000 250.579964 
 127.179444 35.715000 250.015122 
 127.179667 35.715000 250.663305 
 127.179778 35.715000 250.753302 
 127.179889 35.715000 250.612689 
 127.180000 35.715000 250.627677 
 127.178889 35.715111 249.834851 
 127.179000 35.715111 249.964525 
 127.179111 35.715111 249.976895 
 127.179222 35.715111 250.176390 
 127.179444 35.715111 249.354155 
 127.179667 35.715111 249.779462 
 127.179778 35.715111 250.482197 
 127.179889 35.715111 250.645995 
 127.180000 35.715111 250.770389 
 127.178889 35.715222 249.792758 
 127.179000 35.715222 249.853012 
 127.179111 35.715222 249.884528 
 127.179222 35.715222 250.015788 
 127.179444 35.715222 249.056455 
 127.179667 35.715222 249.500311 
 127.179778 35.715222 250.467472 
 127.179889 35.715222 250.795063 
 127.180000 35.715222 251.043805 
 127.178889 35.715333 249.787465 
 127.179000 35.715333 249.823881 
 127.179111 35.715333 249.894167 
 127.179222 35.715333 250.092982 
 127.179444 35.715333 249.071343 
 127.179667 35.715333 249.562966 
 127.179778 35.715333 250.622821 
 127.179889 35.715333 251.029832 
 127.180000 35.715333 251.388204 
 127.179000 35.715333 249.823881 
 127.179111 35.715333 249.894167 
 127.179222 35.715333 250.092982 
 127.179333 35.715333 249.869234 
 127.179556 35.715333 248.910846 
 127.179778 35.715333 250.622821 
 127.179889 35.715333 251.029832 
 127.180000 35.715333 251.388204 
 127.180111 35.715333 252.051692 
 127.179000 35.715445 249.834200 
 127.179111 35.715445 249.984475 
 127.179222 35.715445 250.350789 
 127.179333 35.715445 250.285007 
 127.179556 35.715445 249.040995 
 127.179778 35.715445 250.844085 
 127.179889 35.715445 251.253128 
 127.180000 35.715445 251.675515 
 127.180111 35.715445 252.246186 
 127.179000 35.715556 249.876609 
 127.179111 35.715556 250.164838 
 127.179222 35.715556 250.690373 
 127.179333 35.715556 250.748107 
 127.179556 35.715556 249.346902 
 127.179778 35.715556 251.047417 
 127.179889 35.715556 251.410168 
 127.180000 35.715556 251.877006 
 127.180111 35.715556 252.362817 
 127.179000 35.715667 249.964097 
 127.179111 35.715667 250.433359 
 127.179222 35.715667 250.996053 
 127.179333 35.715667 251.098322 
 127.179556 35.715667 249.970336 
 127.179778 35.715667 251.233042 
 127.179889 35.715667 251.531413 
 127.180000 35.715667 252.031529 
 127.180111 35.715667 252.441753 
 127.179111 35.715667 250.433359 
 127.179222 35.715667 250.996053 
 127.179333 35.715667 251.098322 
 127.179444 35.715667 250.537753 
 127.179667 35.715667 250.646820 
 127.179889 35.715667 251.531413 
 127.180000 35.715667 252.031529 
 127.180111 35.715667 252.441753 
 127.180222 35.715667 252.594652 
 127.179111 35.715778 250.738714 
 127.179222 35.715778 251.216539 
 127.179333 35.715778 251.360483 
 127.179444 35.715778 251.262211 
 127.179667 35.715778 251.437952 
 127.179889 35.715778 251.667776 
 127.180000 35.715778 252.167335 
 127.180111 35.715778 252.503445 
 127.180222 35.715778 252.637142 
 127.179111 35.715889 251.011398 
 127.179222 35.715889 251.397906 
 127.179333 35.715889 251.720336 
 127.179444 35.715889 252.269617 
 127.179667 35.715889 252.748493 
 127.179889 35.715889 251.900184 
 127.180000 35.715889 252.313293 
 127.180111 35.715889 252.566132 
 127.180222 35.715889 252.697837 
 127.179222 35.715889 251.397906 
 127.179333 35.715889 251.720336 
 127.179444 35.715889 252.269617 
 127.179556 35.715889 252.996794 
 127.179778 35.715889 251.985026 
 127.180000 35.715889 252.313293 
 127.180111 35.715889 252.566132 
 127.180222 35.715889 252.697837 
 127.180333 35.715889 252.852463 
 127.179222 35.716000 251.682390 
 127.179333 35.716000 252.552391 
 127.179444 35.716000 253.868699 
 127.179556 35.716000 254.689397 
 127.179778 35.716000 253.012982 
 127.180000 35.716000 252.541476 
 127.180111 35.716000 252.659570 
 127.180222 35.716000 252.788188 
 127.180333 35.716000 252.930538 
 127.179222 35.716111 252.360192 
 127.179333 35.716111 254.222767 
 127.179444 35.716111 255.726775 
 127.179556 35.716111 255.720266 
 127.179778 35.716111 254.485605 
 127.180000 35.716111 253.050831 
 127.180111 35.716111 252.849557 
 127.180222 35.716111 252.924370 
 127.180333 35.716111 253.016005 
 127.179222 35.716222 253.756126 
 127.179333 35.716222 256.244603 
 127.179444 35.716222 257.058761 
 127.179556 35.716222 256.247895 
 127.179778 35.716222 255.770639 
 127.180000 35.716222 254.176747 
 127.180111 35.716222 253.268442 
 127.180222 35.716222 253.151631 
 127.180333 35.716222 253.151798 
 127.179333 35.716222 256.244603 
 127.179444 35.716222 257.058761 
 127.179556 35.716222 256.247895 
 127.179667 35.716222 255.756309 
 127.179889 35.716222 255.516599 
 127.180111 35.716222 253.268442 
 127.180222 35.716222 253.151631 
 127.180333 35.716222 253.151798 
 127.180444 35.716222 253.223275 
 127.179333 35.716333 257.660162 
 127.179444 35.716333 257.732729 
 127.179556 35.716333 256.530843 
 127.179667 35.716333 256.085235 
 127.179889 35.716333 257.085751 
 127.180111 35.716333 254.098401 
 127.180222 35.716333 253.592400 
 127.180333 35.716333 253.438726 
 127.180444 35.716333 253.573221 
 127.179333 35.716444 258.352722 
 127.179444 35.716444 258.016777 
 127.179556 35.716444 256.757730 
 127.179667 35.716444 256.552696 
 127.179889 35.716444 257.924204 
 127.180111 35.716444 255.431462 
 127.180222 35.716444 254.473505 
 127.180333 35.716444 254.066988 
 127.180444 35.716444 254.318332 
 127.179333 35.716556 258.631949 
 127.179444 35.716556 258.138596 
 127.179556 35.716556 257.215951 
 127.179667 35.716556 257.621151 
 127.179889 35.716556 258.413026 
 127.180111 35.716556 257.081236 
 127.180222 35.716556 255.986567 
 127.180333 35.716556 255.263367 
 127.180444 35.716556 255.559534 
 127.179444 35.716556 258.138596 
 127.179556 35.716556 257.215951 
 127.179667 35.716556 257.621151 
 127.179778 35.716556 258.357927 
 127.180000 35.716556 258.114291 
 127.180222 35.716556 255.986567 
 127.180333 35.716556 255.263367 
 127.180444 35.716556 255.559534 
 127.180556 35.716556 257.141029 
 127.179444 35.716667 258.351599 
 127.179556 35.716667 258.625852 
 127.179667 35.716667 260.030248 
 127.179778 35.716667 259.898281 
 127.180000 35.716667 258.647974 
 127.180222 35.716667 257.934081 
 127.180333 35.716667 257.009183 
 127.180444 35.716667 257.005933 
 127.180556 35.716667 257.889391 
 127.179444 35.716778 259.318020 
 127.179556 35.716778 262.153805 
 127.179667 35.716778 264.058313 
 127.179778 35.716778 262.199935 
 127.180000 35.716778 259.147415 
 127.180222 35.716778 259.680066 
 127.180333 35.716778 258.779225 
 127.180444 35.716778 258.158142 
 127.180556 35.716778 258.277666 
 127.179556 35.716778 262.153805 
 127.179667 35.716778 264.058313 
 127.179778 35.716778 262.199935 
 127.179889 35.716778 259.661196 
 127.180111 35.716778 259.907638 
 127.180333 35.716778 258.779225 
 127.180444 35.716778 258.158142 
 127.180556 35.716778 258.277666 
 127.180667 35.716778 258.386146 
 127.179556 35.716889 267.435109 
 127.179667 35.716889 268.395575 
 127.179778 35.716889 265.075011 
 127.179889 35.716889 260.887760 
 127.180111 35.716889 260.817907 
 127.180333 35.716889 260.067835 
 127.180444 35.716889 258.901855 
 127.180556 35.716889 258.507439 
 127.180667 35.716889 258.477722 
 127.179556 35.717000 271.632266 
 127.179667 35.717000 271.482227 
 127.179778 35.717000 267.931706 
 127.179889 35.717000 262.773843 
 127.180111 35.717000 261.620476 
 127.180333 35.717000 260.870939 
 127.180444 35.717000 259.462784 
 127.180556 35.717000 258.747838 
 127.180667 35.717000 258.635358 
 127.179556 35.717111 273.732202 
 127.179667 35.717111 273.192254 
 127.179778 35.717111 270.215298 
 127.179889 35.717111 265.279874 
 127.180111 35.717111 262.663666 
 127.180333 35.717111 261.467829 
 127.180444 35.717111 260.131968 
 127.180556 35.717111 259.164053 
 127.180667 35.717111 258.947922 
 127.179667 35.717111 273.192254 
 127.179778 35.717111 270.215298 
 127.179889 35.717111 265.279874 
 127.180000 35.717111 263.388161 
 127.180222 35.717111 262.018881 
 127.180444 35.717111 260.131968 
 127.180556 35.717111 259.164053 
 127.180667 35.717111 258.947922 
 127.180778 35.717111 259.299363 
 127.179667 35.717222 274.039350 
 127.179778 35.717222 271.703015 
 127.179889 35.717222 267.863224 
 127.180000 35.717222 266.348106 
 127.180222 35.717222 262.613560 
 127.180444 35.717222 261.083929 
 127.180556 35.717222 259.913584 
 127.180667 35.717222 259.440608 
 127.180778 35.717222 259.608378 
 127.179667 35.717333 274.390612 
 127.179778 35.717333 272.377651 
 127.179889 35.717333 269.659744 
 127.180000 35.717333 268.728933 
 127.180222 35.717333 263.519127 
 127.180444 35.717333 262.151705 
 127.180556 35.717333 260.945142 
 127.180667 35.717333 259.959180 
 127.180778 35.717333 259.788692 
 127.179667 35.717444 274.385590 
 127.179778 35.717444 272.334329 
 127.179889 35.717444 270.454633 
 127.180000 35.717444 269.956940 
 127.180222 35.717444 264.711718 
 127.180444 35.717444 262.970818 
 127.180556 35.717444 261.904220 
 127.180667 35.717444 260.365310 
 127.180778 35.717444 259.919308 
 127.179778 35.717444 272.334329 
 127.179889 35.717444 270.454633 
 127.180000 35.717444 269.956940 
 127.180111 35.717444 268.349932 
 127.180333 35.717444 263.427060 
 127.180556 35.717444 261.904220 
 127.180667 35.717444 260.365310 
 127.180778 35.717444 259.919308 
 127.180889 35.717444 259.938738 
 127.179778 35.717555 271.846974 
 127.179889 35.717555 270.681230 
 127.180000 35.717555 270.450778 
 127.180111 35.717555 269.535364 
 127.180333 35.717555 263.928249 
 127.180556 35.717555 262.560902 
 127.180667 35.717555 260.740343 
 127.180778 35.717555 260.111464 
 127.180889 35.717555 260.174526 
 127.179778 35.717667 271.317850 
 127.179889 35.717667 270.723192 
 127.180000 35.717667 270.657386 
 127.180111 35.717667 270.225559 
 127.180333 35.717667 264.502890 
 127.180556 35.717667 263.037647 
 127.180667 35.717667 261.305975 
 127.180778 35.717667 260.526742 
 127.180889 35.717667 260.664747 
 127.179889 35.717667 270.723192 
 127.180000 35.717667 270.657386 
 127.180111 35.717667 270.225559 
 127.180222 35.717667 267.335140 
 127.180444 35.717667 263.732597 
 127.180667 35.717667 261.305975 
 127.180778 35.717667 260.526742 
 127.180889 35.717667 260.664747 
 127.181000 35.717667 261.549858 
 127.179889 35.717778 270.735524 
 127.180000 35.717778 270.798234 
 127.180111 35.717778 270.738397 
 127.180222 35.717778 268.787499 
 127.180444 35.717778 264.053261 
 127.180667 35.717778 262.277761 
 127.180778 35.717778 261.373311 
 127.180889 35.717778 261.440168 
 127.181000 35.717778 262.040785 
 127.179889 35.717889 270.766454 
 127.180000 35.717889 270.972270 
 127.180111 35.717889 271.189046 
 127.180222 35.717889 270.105050 
 127.180444 35.717889 264.638581 
 127.180667 35.717889 263.560094 
 127.180778 35.717889 262.630071 
 127.180889 35.717889 262.240154 
 127.181000 35.717889 262.308232 
 127.179889 35.718000 270.838440 
 127.180000 35.718000 271.207153 
 127.180111 35.718000 271.541841 
 127.180222 35.718000 271.037744 
 127.180444 35.718000 265.770757 
 127.180667 35.718000 264.624028 
 127.180778 35.718000 263.772950 
 127.180889 35.718000 262.783351 
 127.181000 35.718000 262.447461 
 127.180000 35.718000 271.207153 
 127.180111 35.718000 271.541841 
 127.180222 35.718000 271.037744 
 127.180333 35.718000 268.698546 
 127.180556 35.718000 264.964449 
 127.180778 35.718000 263.772950 
 127.180889 35.718000 262.783351 
 127.181000 35.718000 262.447461 
 127.181111 35.718000 262.476233 
 127.180000 35.718111 271.465265 
 127.180111 35.718111 271.774489 
 127.180222 35.718111 271.604216 
 127.180333 35.718111 270.392587 
 127.180556 35.718111 265.692158 
 127.180778 35.718111 264.444813 
 127.180889 35.718111 263.100530 
 127.181000 35.718111 262.566276 
 127.181111 35.718111 262.684884 
 127.180000 35.718222 271.685727 
 127.180111 35.718222 271.923867 
 127.180222 35.718222 271.968691 
 127.180333 35.718222 271.652905 
 127.180556 35.718222 266.464076 
 127.180778 35.718222 264.795107 
 127.180889 35.718222 263.355472 
 127.181000 35.718222 262.770970 
 127.181111 35.718222 263.081950 
 127.180111 35.718222 271.923867 
 127.180222 35.718222 271.968691 
 127.180333 35.718222 271.652905 
 127.180444 35.718222 269.582724 
 127.180667 35.718222 265.532248 
 127.180889 35.718222 263.355472 
 127.181000 35.718222 262.770970 
 127.181111 35.718222 263.081950 
 127.181222 35.718222 263.733119 
 127.180111 35.718333 272.045659 
 127.180222 35.718333 272.277473 
 127.180333 35.718333 272.480077 
 127.180444 35.718333 271.209292 
 127.180667 35.718333 265.860004 
 127.180889 35.718333 263.708819 
 127.181000 35.718333 263.208593 
 127.181111 35.718333 263.626828 
 127.181222 35.718333 264.003089 
 127.180111 35.718444 272.194882 
 127.180222 35.718444 272.606882 
 127.180333 35.718444 272.987172 
 127.180444 35.718444 272.274216 
 127.180667 35.718444 266.520125 
 127.180889 35.718444 264.338767 
 127.181000 35.718444 264.031370 
 127.181111 35.718444 264.185715 
 127.181222 35.718444 264.186947 
 127.180111 35.718555 272.414588 
 127.180222 35.718555 272.938781 
 127.180333 35.718555 273.274689 
 127.180444 35.718555 272.908102 
 127.180667 35.718555 267.927171 
 127.180889 35.718555 265.314968 
 127.181000 35.718555 265.125871 
 127.181111 35.718555 264.720070 
 127.181222 35.718555 264.385485 
 127.180222 35.718555 272.938781 
 127.180333 35.718555 273.274689 
 127.180444 35.718555 272.908102 
 127.180556 35.718555 270.669627 
 127.180778 35.718555 266.278713 
 127.181000 35.718555 265.125871 
 127.181111 35.718555 264.720070 
 127.181222 35.718555 264.385485 
 127.181333 35.718555 264.504488 
 127.180222 35.718667 273.207859 
 127.180333 35.718667 273.429998 
 127.180444 35.718667 273.279046 
 127.180556 35.718667 272.182896 
 127.180778 35.718667 267.652842 
 127.181000 35.718667 266.059116 
 127.181111 35.718667 265.286611 
 127.181222 35.718667 264.686162 
 127.181333 35.718667 264.829921 
 127.180222 35.718778 273.381810 
 127.180333 35.718778 273.516321 
 127.180444 35.718778 273.503449 
 127.180556 35.718778 273.138370 
 127.180778 35.718778 269.179494 
 127.181000 35.718778 266.595477 
 127.181111 35.718778 265.868809 
 127.181222 35.718778 265.114819 
 127.181333 35.718778 265.162648 
 127.180333 35.718778 273.516321 
 127.180444 35.718778 273.503449 
 127.180556 35.718778 273.138370 
 127.180667 35.718778 272.030360 
 127.180889 35.718778 266.947506 
 127.181111 35.718778 265.868809 
 127.181222 35.718778 265.114819 
 127.181333 35.718778 265.162648 
 127.181444 35.718778 265.378656 
 127.180333 35.718889 273.573873 
 127.180444 35.718889 273.652241 
 127.180556 35.718889 273.622578 
 127.180667 35.718889 273.140700 
 127.180889 35.718889 267.295260 
 127.181111 35.718889 266.331583 
 127.181222 35.718889 265.539181 
 127.181333 35.718889 265.390376 
 127.181444 35.718889 265.510253 
 127.180333 35.719000 273.626706 
 127.180444 35.719000 273.769269 
 127.180556 35.719000 273.894189 
 127.180667 35.719000 273.784480 
 127.180889 35.719000 267.622662 
 127.181111 35.719000 266.596747 
 127.181222 35.719000 265.807762 
 127.181333 35.719000 265.558511 
 127.181444 35.719000 265.782494 
 127.180333 35.719111 273.689630 
 127.180444 35.719111 273.893886 
 127.180556 35.719111 274.173945 
 127.180667 35.719111 274.435766 
 127.180889 35.719111 268.242884 
 127.181111 35.719111 266.756035 
 127.181222 35.719111 265.996474 
 127.181333 35.719111 265.829562 
 127.181444 35.719111 266.404576 
 127.180444 35.719111 273.893886 
 127.180556 35.719111 274.173945 
 127.180667 35.719111 274.435766 
 127.180778 35.719111 272.762646 
 127.181000 35.719111 267.078813 
 127.181222 35.719111 265.996474 
 127.181333 35.719111 265.829562 
 127.181444 35.719111 266.404576 
 127.181556 35.719111 267.466689 
 127.180444 35.719222 274.088560 
 127.180556 35.719222 274.641964 
 127.180667 35.719222 275.329311 
 127.180778 35.719222 274.439769 
 127.181000 35.719222 267.426166 
 127.181222 35.719222 266.373667 
 127.181333 35.719222 266.441926 
 127.181444 35.719222 267.527422 
 127.181556 35.719222 268.816444 
 127.180444 35.719333 274.449836 
 127.180556 35.719333 275.390774 
 127.180667 35.719333 276.329136 
 127.180778 35.719333 275.970332 
 127.181000 35.719333 268.500664 
 127.181222 35.719333 267.395308 
 127.181333 35.719333 267.609358 
 127.181444 35.719333 268.867472 
 127.181556 35.719333 269.762474 
 127.180556 35.719444 276.292905 
 127.180667 35.719444 277.113026 
 127.180778 35.719444 276.900988 
 127.180889 35.719444 274.356500 
 127.181111 35.719444 269.906409 
 127.181333 35.719444 269.171714 
 127.181444 35.719444 269.896453 
 127.181556 35.719444 270.159278 
 127.181667 35.719444 269.535943 
 127.180556 35.719556 277.058132 
 127.180667 35.719556 277.549725 
 127.180778 35.719556 277.251057 
 127.180889 35.719556 275.776200 
 127.181111 35.719556 272.181249 
 127.181333 35.719556 270.590407 
 127.181444 35.719556 270.480134 
 127.181556 35.719556 270.214557 
 127.181667 35.719556 269.398714 
 127.180556 35.719667 277.538317 
 127.180667 35.719667 277.710897 
 127.180778 35.719667 277.239425 
 127.180889 35.719667 276.245991 
 127.181111 35.719667 273.404641 
 127.181333 35.719667 271.627372 
 127.181444 35.719667 270.816066 
 127.181556 35.719667 270.140869 
 127.181667 35.719667 269.327664 
 127.180667 35.719667 277.710897 
 127.180778 35.719667 277.239425 
 127.180889 35.719667 276.245991 
 127.181000 35.719667 274.843203 
 127.181222 35.719667 272.853348 
 127.181444 35.719667 270.816066 
 127.181556 35.719667 270.140869 
 127.181667 35.719667 269.327664 
 127.181778 35.719667 269.208723 
 127.180667 35.719778 277.689957 
 127.180778 35.719778 277.057661 
 127.180889 35.719778 276.341183 
 127.181000 35.719778 275.336054 
 127.181222 35.719778 273.335438 
 127.181444 35.719778 271.144822 
 127.181556 35.719778 270.132892 
 127.181667 35.719778 269.403174 
 127.181778 35.719778 269.530453 
 127.180667 35.719889 277.544307 
 127.180778 35.719889 276.855358 
 127.180889 35.719889 276.446050 
 127.181000 35.719889 275.687109 
 127.181222 35.719889 273.510467 
 127.181444 35.719889 271.695959 
 127.181556 35.719889 270.456383 
 127.181667 35.719889 269.770024 
 127.181778 35.719889 270.298027 
 127.180778 35.720000 276.776192 
 127.180889 35.720000 276.883718 
 127.181000 35.720000 276.441996 
 127.181111 35.720000 274.313459 
 127.181333 35.720000 273.330747 
 127.181556 35.720000 271.385342 
 127.181667 35.720000 270.671616 
 127.181778 35.720000 271.722524 
 127.181889 35.720000 274.270235 
 127.180778 35.720111 277.021008 
 127.180889 35.720111 277.949282 
 127.181000 35.720111 277.827304 
 127.181111 35.720111 274.950734 
 127.181333 35.720111 273.608063 
 127.181556 35.720111 272.691186 
 127.181667 35.720111 272.132351 
 127.181778 35.720111 273.415426 
 127.181889 35.720111 275.138207 
 127.180778 35.720222 277.813843 
 127.180889 35.720222 279.403263 
 127.181000 35.720222 279.357562 
 127.181111 35.720222 276.103244 
 127.181333 35.720222 274.013139 
 127.181556 35.720222 273.659873 
 127.181667 35.720222 273.508354 
 127.181778 35.720222 274.593406 
 127.181889 35.720222 275.538054 
 127.180889 35.720222 279.403263 
 127.181000 35.720222 279.357562 
 127.181111 35.720222 276.103244 
 127.181222 35.720222 274.112193 
 127.181444 35.720222 273.940010 
 127.181667 35.720222 273.508354 
 127.181778 35.720222 274.593406 
 127.181889 35.720222 275.538054 
 127.182000 35.720222 276.057888 
 127.180889 35.720333 280.551857 
 127.181000 35.720333 280.521044 
 127.181111 35.720333 277.901854 
 127.181222 35.720333 275.292017 
 127.181444 35.720333 274.258732 
 127.181667 35.720333 274.259336 
 127.181778 35.720333 275.138603 
 127.181889 35.720333 275.763207 
 127.182000 35.720333 276.415315 
 127.180889 35.720444 281.220148 
 127.181000 35.720444 281.486108 
 127.181111 35.720444 280.291007 
 127.181222 35.720444 277.049690 
 127.181444 35.720444 274.631686 
 127.181667 35.720444 274.574889 
 127.181778 35.720444 275.392283 
 127.181889 35.720444 276.013136 
 127.182000 35.720444 276.954701 
 127.180889 35.720556 281.653851 
 127.181000 35.720556 282.618309 
 127.181111 35.720556 282.291243 
 127.181222 35.720556 278.381014 
 127.181444 35.720556 275.376012 
 127.181667 35.720556 274.801678 
 127.181778 35.720556 275.648620 
 127.181889 35.720556 276.428138 
 127.182000 35.720556 277.639867 
 127.181000 35.720556 282.618309 
 127.181111 35.720556 282.291243 
 127.181222 35.720556 278.381014 
 127.181333 35.720556 277.362564 
 127.181556 35.720556 274.502001 
 127.181778 35.720556 275.648620 
 127.181889 35.720556 276.428138 
 127.182000 35.720556 277.639867 
 127.182111 35.720556 278.801752 
 127.181000 35.720667 283.764558 
 127.181111 35.720667 283.370310 
 127.181222 35.720667 279.356176 
 127.181333 35.720667 278.725914 
 127.181556 35.720667 274.984513 
 127.181778 35.720667 276.151474 
 127.181889 35.720667 277.087629 
 127.182000 35.720667 278.304770 
 127.182111 35.720667 279.112064 
 127.181000 35.720778 284.509921 
 127.181111 35.720778 283.914375 
 127.181222 35.720778 280.508184 
 127.181333 35.720778 280.793583 
 127.181556 35.720778 276.157313 
 127.181778 35.720778 277.046787 
 127.181889 35.720778 277.888673 
 127.182000 35.720778 278.799044 
 127.182111 35.720778 279.374805 
 127.181111 35.720778 283.914375 
 127.181222 35.720778 280.508184 
 127.181333 35.720778 280.793583 
 127.181444 35.720778 279.710364 
 127.181667 35.720778 276.177333 
 127.181889 35.720778 277.888673 
 127.182000 35.720778 278.799044 
 127.182111 35.720778 279.374805 
 127.182222 35.720778 280.303058 
 127.181111 35.720889 284.282423 
 127.181222 35.720889 282.289179 
 127.181333 35.720889 283.370981 
 127.181444 35.720889 282.686575 
 127.181667 35.720889 277.487545 
 127.181889 35.720889 278.544165 
 127.182000 35.720889 279.117016 
 127.182111 35.720889 279.712683 
 127.182222 35.720889 281.278506 
 127.181111 35.721000 284.740813 
 127.181222 35.721000 284.421072 
 127.181333 35.721000 285.282988 
 127.181444 35.721000 284.694273 
 127.181667 35.721000 278.572644 
 127.181889 35.721000 278.913349 
 127.182000 35.721000 279.362245 
 127.182111 35.721000 280.280362 
 127.182222 35.721000 282.682842 
 127.181222 35.721000 284.421072 
 127.181333 35.721000 285.282988 
 127.181444 35.721000 284.694273 
 127.181556 35.721000 280.408104 
 127.181778 35.721000 278.640188 
 127.182000 35.721000 279.362245 
 127.182111 35.721000 280.280362 
 127.182222 35.721000 282.682842 
 127.182333 35.721000 285.628766 
 127.181222 35.721111 285.801544 
 127.181333 35.721111 286.203684 
 127.181444 35.721111 285.888034 
 127.181556 35.721111 282.222346 
 127.181778 35.721111 278.913501 
 127.182000 35.721111 279.667774 
 127.182111 35.721111 281.228195 
 127.182222 35.721111 284.245168 
 127.182333 35.721111 286.517095 
 127.181222 35.721222 286.356784 
 127.181333 35.721222 286.750784 
 127.181444 35.721222 286.906885 
 127.181556 35.721222 283.825822 
 127.181778 35.721222 279.093644 
 127.182000 35.721222 280.182006 
 127.182111 35.721222 282.567303 
 127.182222 35.721222 285.547751 
 127.182333 35.721222 287.021038 
 127.181222 35.721333 286.665333 
 127.181333 35.721333 287.408191 
 127.181444 35.721333 287.935044 
 127.181556 35.721333 285.312600 
 127.181778 35.721333 279.400541 
 127.182000 35.721333 281.019609 
 127.182111 35.721333 283.969872 
 127.182222 35.721333 286.365206 
 127.182333 35.721333 287.291388 
 127.181333 35.721333 287.408191 
 127.181444 35.721333 287.935044 
 127.181556 35.721333 285.312600 
 127.181667 35.721333 280.737670 
 127.181889 35.721333 279.567846 
 127.182111 35.721333 283.969872 
 127.182222 35.721333 286.365206 
 127.182333 35.721333 287.291388 
 127.182444 35.721333 287.753984 
 127.181333 35.721444 288.272049 
 127.181444 35.721444 288.782059 
 127.181556 35.721444 286.573947 
 127.181667 35.721444 281.953377 
 127.181889 35.721444 280.263065 
 127.182111 35.721444 284.918579 
 127.182222 35.721444 286.731934 
 127.182333 35.721444 287.453529 
 127.182444 35.721444 288.042530 
 127.181333 35.721556 289.102131 
 127.181444 35.721556 289.343280 
 127.181556 35.721556 287.604357 
 127.181667 35.721556 283.801481 
 127.181889 35.721556 281.539686 
 127.182111 35.721556 285.175474 
 127.182222 35.721556 286.757057 
 127.182333 35.721556 287.593246 
 127.182444 35.721556 288.442471 
 127.181444 35.721556 289.343280 
 127.181556 35.721556 287.604357 
 127.181667 35.721556 283.801481 
 127.181778 35.721556 281.798816 
 127.182000 35.721556 283.017726 
 127.182222 35.721556 286.757057 
 127.182333 35.721556 287.593246 
 127.182444 35.721556 288.442471 
 127.182556 35.721556 289.367578 
 127.181444 35.721667 289.697607 
 127.181556 35.721667 288.550372 
 127.181667 35.721667 286.318584 
 127.181778 35.721667 284.507577 
 127.182000 35.721667 283.591004 
 127.182222 35.721667 286.523540 
 127.182333 35.721667 287.763354 
 127.182444 35.721667 288.896057 
 127.182556 35.721667 289.673129 
 127.181444 35.721778 289.993879 
 127.181556 35.721778 289.596448 
 127.181667 35.721778 288.857976 
 127.181778 35.721778 287.325095 
 127.182000 35.721778 283.949375 
 127.182222 35.721778 286.128206 
 127.182333 35.721778 287.974983 
 127.182444 35.721778 289.292495 
 127.182556 35.721778 289.899450 
 127.181444 35.721889 290.393939 
 127.181556 35.721889 290.691501 
 127.181667 35.721889 290.592593 
 127.181778 35.721889 289.232534 
 127.182000 35.721889 284.351875 
 127.182222 35.721889 285.747258 
 127.182333 35.721889 288.189408 
 127.182444 35.721889 289.574895 
 127.182556 35.721889 290.135508 
 127.181556 35.721889 290.691501 
 127.181667 35.721889 290.592593 
 127.181778 35.721889 289.232534 
 127.181889 35.721889 285.983587 
 127.182111 35.721889 284.401741 
 127.182333 35.721889 288.189408 
 127.182444 35.721889 289.574895 
 127.182556 35.721889 290.135508 
 127.182667 35.721889 291.056153 
 127.181556 35.722000 291.538145 
 127.181667 35.722000 291.491997 
 127.181778 35.722000 290.298704 
 127.181889 35.722000 287.064087 
 127.182111 35.722000 284.627158 
 127.182333 35.722000 288.380016 
 127.182444 35.722000 289.784471 
 127.182556 35.722000 290.508490 
 127.182667 35.722000 292.191197 
 127.181556 35.722111 292.015221 
 127.181667 35.722111 291.942244 
 127.181778 35.722111 291.063145 
 127.181889 35.722111 288.535849 
 127.182111 35.722111 285.456383 
 127.182333 35.722111 288.618307 
 127.182444 35.722111 290.018997 
 127.182556 35.722111 291.171769 
 127.182667 35.722111 293.799480 
 127.181667 35.722111 291.942244 
 127.181778 35.722111 291.063145 
 127.181889 35.722111 288.535849 
 127.182000 35.722111 286.492126 
 127.182222 35.722111 285.894033 
 127.182444 35.722111 290.018997 
 127.182556 35.722111 291.171769 
 127.182667 35.722111 293.799480 
 127.182778 35.722111 296.653641 
 127.181667 35.722222 292.300102 
 127.181778 35.722222 292.111938 
 127.181889 35.722222 290.881799 
 127.182000 35.722222 288.909883 
 127.182222 35.722222 286.991208 
 127.182444 35.722222 290.431752 
 127.182556 35.722222 292.259633 
 127.182667 35.722222 295.531661 
 127.182778 35.722222 297.817512 
 127.181667 35.722333 292.911814 
 127.181778 35.722333 293.993755 
 127.181889 35.722333 294.078426 
 127.182000 35.722333 292.265868 
 127.182222 35.722333 289.414097 
 127.182444 35.722333 291.283867 
 127.182556 35.722333 293.761625 
 127.182667 35.722333 296.978698 
 127.182778 35.722333 298.576400 
 127.181667 35.722444 294.256211 
 127.181778 35.722444 296.750013 
 127.181889 35.722444 297.337950 
 127.182000 35.722444 295.837947 
 127.182222 35.722444 293.303946 
 127.182444 35.722444 292.992887 
 127.182556 35.722444 295.491427 
 127.182667 35.722444 298.058298 
 127.182778 35.722444 299.245784 
 127.181778 35.722444 296.750013 
 127.181889 35.722444 297.337950 
 127.182000 35.722444 295.837947 
 127.182111 35.722444 293.830383 
 127.182333 35.722444 293.625340 
 127.182556 35.722444 295.491427 
 127.182667 35.722444 298.058298 
 127.182778 35.722444 299.245784 
 127.182889 35.722444 301.705049 
 127.181778 35.722556 299.493773 
 127.181889 35.722556 299.848134 
 127.182000 35.722556 298.784344 
 127.182111 35.722556 297.444348 
 127.182333 35.722556 297.717874 
 127.182556 35.722556 297.333267 
 127.182667 35.722556 299.039424 
 127.182778 35.722556 300.261002 
 127.182889 35.722556 304.756279 
 127.181778 35.722667 301.366068 
 127.181889 35.722667 301.423741 
 127.182000 35.722667 300.766673 
 127.182111 35.722667 300.108517 
 127.182333 35.722667 300.816532 
 127.182556 35.722667 299.461336 
 127.182667 35.722667 300.408632 
 127.182778 35.722667 302.113907 
 127.182889 35.722667 308.488925 
 127.181889 35.722667 301.423741 
 127.182000 35.722667 300.766673 
 127.182111 35.722667 300.108517 
 127.182222 35.722667 300.515583 
 127.182444 35.722667 299.298235 
 127.182667 35.722667 300.408632 
 127.182778 35.722667 302.113907 
 127.182889 35.722667 308.488925 
 127.183000 35.722667 314.097412 
 127.181889 35.722778 302.314897 
 127.182000 35.722778 301.943511 
 127.182111 35.722778 301.697225 
 127.182222 35.722778 302.056723 
 127.182444 35.722778 301.881685 
 127.182667 35.722778 302.534488 
 127.182778 35.722778 304.808575 
 127.182889 35.722778 311.468251 
 127.183000 35.722778 315.221517 
 127.181889 35.722889 302.794625 
 127.182000 35.722889 302.586186 
 127.182111 35.722889 302.505744 
 127.182222 35.722889 302.727555 
 127.182444 35.722889 303.326335 
 127.182667 35.722889 304.841918 
 127.182778 35.722889 307.267002 
 127.182889 35.722889 313.153056 
 127.183000 35.722889 316.095298 
 127.181889 35.723000 303.046920 
 127.182000 35.723000 302.914160 
 127.182111 35.723000 302.880818 
 127.182222 35.723000 303.045713 
 127.182444 35.723000 304.217418 
 127.182667 35.723000 306.361257 
 127.182778 35.723000 308.606195 
 127.182889 35.723000 314.022129 
 127.183000 35.723000 317.314305 
 127.182000 35.723000 302.914160 
 127.182111 35.723000 302.880818 
 127.182222 35.723000 303.045713 
 127.182333 35.723000 303.366296 
 127.182556 35.723000 305.804041 
 127.182778 35.723000 308.606195 
 127.182889 35.723000 314.022129 
 127.183000 35.723000 317.314305 
 127.183111 35.723000 321.640650 
 127.182000 35.723111 303.065201 
 127.182111 35.723111 303.065834 
 127.182222 35.723111 303.302084 
 127.182333 35.723111 303.862908 
 127.182556 35.723111 306.571066 
 127.182778 35.723111 309.070960 
 127.182889 35.723111 314.731044 
 127.183000 35.723111 319.435396 
 127.183111 35.723111 325.167054 
 127.182000 35.723222 303.129948 
 127.182111 35.723222 303.216622 
 127.182222 35.723222 303.672920 
 127.182333 35.723222 304.628026 
 127.182556 35.723222 307.107815 
 127.182778 35.723222 309.345340 
 127.182889 35.723222 315.931157 
 127.183000 35.723222 322.695037 
 127.183111 35.723222 328.380964 
 127.182111 35.723222 303.216622 
 127.182222 35.723222 303.672920 
 127.182333 35.723222 304.628026 
 127.182444 35.723222 306.007619 
 127.182667 35.723222 307.483007 
 127.182889 35.723222 315.931157 
 127.183000 35.723222 322.695037 
 127.183111 35.723222 328.380964 
 127.183222 35.723222 331.738689 
 127.182111 35.723333 303.443731 
 127.182222 35.723333 304.282867 
 127.182333 35.723333 305.666480 
 127.182444 35.723333 307.032382 
 127.182667 35.723333 308.213318 
 127.182889 35.723333 318.257087 
 127.183000 35.723333 326.381262 
 127.183111 35.723333 330.529222 
 127.183222 35.723333 332.999712 
 127.182111 35.723444 303.838135 
 127.182222 35.723444 305.164235 
 127.182333 35.723444 306.770311 
 127.182444 35.723444 307.920057 
 127.182667 35.723444 310.191830 
 127.182889 35.723444 321.591564 
 127.183000 35.723444 329.184380 
 127.183111 35.723444 331.732443 
 127.183222 35.723444 334.452877 
 127.182222 35.723444 305.164235 
 127.182333 35.723444 306.770311 
 127.182444 35.723444 307.920057 
 127.182556 35.723444 308.679491 
 127.182778 35.723444 313.319586 
 127.183000 35.723444 329.184380 
 127.183111 35.723444 331.732443 
 127.183222 35.723444 334.452877 
 127.183333 35.723444 340.931609 
 127.182222 35.723556 306.199793 
 127.182333 35.723556 307.696715 
 127.182444 35.723556 308.592619 
 127.182556 35.723556 309.931581 
 127.182778 35.723556 318.004179 
 127.183000 35.723556 330.599687 
 127.183111 35.723556 332.472571 
 127.183222 35.723556 336.256752 
 127.183333 35.723556 342.715821 
 127.182222 35.723667 307.168634 
 127.182333 35.723667 308.359681 
 127.182444 35.723667 309.157420 
 127.182556 35.723667 311.486299 
 127.182778 35.723667 321.167667 
 127.183000 35.723667 330.934666 
 127.183111 35.723667 333.081688 
 127.183222 35.723667 337.967088 
 127.183333 35.723667 343.554667 
 127.182222 35.723778 307.927041 
 127.182333 35.723778 308.848004 
 127.182444 35.723778 309.869473 
 127.182556 35.723778 313.359998 
 127.182778 35.723778 322.311336 
 127.183000 35.723778 330.715743 
 127.183111 35.723778 333.569617 
 127.183222 35.723778 338.848091 
 127.183333 35.723778 343.623995 
 127.182333 35.723778 308.848004 
 127.182444 35.723778 309.869473 
 127.182556 35.723778 313.359998 
 127.182667 35.723778 319.790222 
 127.182889 35.723778 324.675821 
 127.183111 35.723778 333.569617 
 127.183222 35.723778 338.848091 
 127.183333 35.723778 343.623995 
 127.183444 35.723778 345.220929 
 127.182333 35.723889 309.343207 
 127.182444 35.723889 311.076917 
 127.182556 35.723889 315.394136 
 127.182667 35.723889 320.577923 
 127.182889 35.723889 324.553394 
 127.183111 35.723889 333.679825 
 127.183222 35.723889 338.530234 
 127.183333 35.723889 343.039845 
 127.183444 35.723889 344.953526 
 127.182333 35.724000 310.102680 
 127.182444 35.724000 312.990440 
 127.182556 35.724000 317.149478 
 127.182667 35.724000 320.723477 
 127.182889 35.724000 324.860580 
 127.183111 35.724000 333.378877 
 127.183222 35.724000 337.254364 
 127.183333 35.724000 341.827274 
 127.183444 35.724000 344.646919 
 127.182444 35.724000 312.990440 
 127.182556 35.724000 317.149478 
 127.182667 35.724000 320.723477 
 127.182778 35.724000 322.677894 
 127.183000 35.724000 330.671072 
 127.183222 35.724000 337.254364 
 127.183333 35.724000 341.827274 
 127.183444 35.724000 344.646919 
 127.183556 35.724000 347.382508 
 127.182444 35.724111 315.241338 
 127.182556 35.724111 318.308882 
 127.182667 35.724111 320.637713 
 127.182778 35.724111 322.849025 
 127.183000 35.724111 331.025905 
 127.183222 35.724111 335.634402 
 127.183333 35.724111 340.129798 
 127.183444 35.724111 344.592216 
 127.183556 35.724111 348.051293 
 127.182444 35.724222 317.074420 
 127.182556 35.724222 318.949730 
 127.182667 35.724222 320.656619 
 127.182778 35.724222 323.517639 
 127.183000 35.724222 331.274323 
 127.183222 35.724222 334.313117 
 127.183333 35.724222 338.538896 
 127.183444 35.724222 345.018101 
 127.183556 35.724222 348.490286 
 127.182556 35.724333 319.335212 
 127.182667 35.724333 321.080400 
 127.182778 35.724333 324.957982 
 127.182889 35.724333 328.440377 
 127.183111 35.724333 332.494510 
 127.183333 35.724333 337.811031 
 127.183444 35.724333 345.609527 
 127.183556 35.724333 348.764070 
 127.183667 35.724333 349.645162 
 127.182556 35.724444 319.697784 
 127.182667 35.724444 322.118314 
 127.182778 35.724444 326.672026 
 127.182889 35.724444 329.160874 
 127.183111 35.724444 332.512062 
 127.183333 35.724444 338.003050 
 127.183444 35.724444 345.866687 
 127.183556 35.724444 348.979778 
 127.183667 35.724444 350.212766 
 127.182556 35.724556 320.247212 
 127.182667 35.724556 323.772478 
 127.182778 35.724556 327.967114 
 127.182889 35.724556 329.509638 
 127.183111 35.724556 332.892314 
 127.183333 35.724556 338.448072 
 127.183444 35.724556 345.538193 
 127.183556 35.724556 349.229840 
 127.183667 35.724556 351.179220 
 127.182667 35.724556 323.772478 
 127.182778 35.724556 327.967114 
 127.182889 35.724556 329.509638 
 127.183000 35.724556 331.110122 
 127.183222 35.724556 334.364063 
 127.183444 35.724556 345.538193 
 127.183556 35.724556 349.229840 
 127.183667 35.724556 351.179220 
 127.183778 35.724556 353.842185 
 127.182667 35.724667 325.676272 
 127.182778 35.724667 328.751641 
 127.182889 35.724667 329.883790 
 127.183000 35.724667 331.760454 
 127.183222 35.724667 335.575163 
 127.183444 35.724667 344.637375 
 127.183556 35.724667 349.600683 
 127.183667 35.724667 352.617886 
 127.183778 35.724667 355.557560 
 127.182667 35.724778 327.302034 
 127.182778 35.724778 329.273959 
 127.182889 35.724778 330.608503 
 127.183000 35.724778 333.361473 
 127.183222 35.724778 336.801212 
 127.183444 35.724778 343.507091 
 127.183556 35.724778 350.158921 
 127.183667 35.724778 354.314536 
 127.183778 35.724778 357.061177 
 127.182778 35.724778 329.273959 
 127.182889 35.724778 330.608503 
 127.183000 35.724778 333.361473 
 127.183111 35.724778 335.850534 
 127.183333 35.724778 338.557970 
 127.183556 35.724778 350.158921 
 127.183667 35.724778 354.314536 
 127.183778 35.724778 357.061177 
 127.183889 35.724778 360.279051 
 127.182778 35.724889 329.809829 
 127.182889 35.724889 331.948028 
 127.183000 35.724889 335.559766 
 127.183111 35.724889 337.682022 
 127.183333 35.724889 338.572573 
 127.183556 35.724889 350.882714 
 127.183667 35.724889 355.811744 
 127.183778 35.724889 358.342390 
 127.183889 35.724889 362.893355 
 127.182778 35.725000 330.626381 
 127.182889 35.725000 333.910728 
 127.183000 35.725000 337.537247 
 127.183111 35.725000 339.038878 
 127.183333 35.725000 338.925958 
 127.183556 35.725000 351.674178 
 127.183667 35.725000 356.874373 
 127.183778 35.725000 359.668303 
 127.183889 35.725000 366.390276 
 127.182778 35.725111 331.950342 
 127.182889 35.725111 336.053412 
 127.183000 35.725111 338.909227 
 127.183111 35.725111 340.167526 
 127.183333 35.725111 339.974307 
 127.183556 35.725111 352.487237 
 127.183667 35.725111 357.640359 
 127.183778 35.725111 361.351316 
 127.183889 35.725111 370.410909 
 127.182889 35.725111 336.053412 
 127.183000 35.725111 338.909227 
 127.183111 35.725111 340.167526 
 127.183222 35.725111 340.295690 
 127.183444 35.725111 342.966080 
 127.183667 35.725111 357.640359 
 127.183778 35.725111 361.351316 
 127.183889 35.725111 370.410909 
 127.184000 35.725111 379.626892 
 127.182889 35.725222 337.810851 
 127.183000 35.725222 339.850515 
 127.183111 35.725222 341.537710 
 127.183222 35.725222 342.913519 
 127.183444 35.725222 344.376236 
 127.183667 35.725222 358.386017 
 127.183778 35.725222 363.571508 
 127.183889 35.725222 374.282811 
 127.184000 35.725222 382.065495 
 127.182889 35.725333 339.042303 
 127.183000 35.725333 340.757257 
 127.183111 35.725333 343.661170 
 127.183222 35.725333 346.786804 
 127.183444 35.725333 347.004613 
 127.183667 35.725333 359.467775 
 127.183778 35.725333 366.357226 
 127.183889 35.725333 377.536898 
 127.184000 35.725333 383.832342 
 127.183000 35.725333 340.757257 
 127.183111 35.725333 343.661170 
 127.183222 35.725333 346.786804 
 127.183333 35.725333 346.193451 
 127.183556 35.725333 354.571530 
 127.183778 35.725333 366.357226 
 127.183889 35.725333 377.536898 
 127.184000 35.725333 383.832342 
 127.184111 35.725333 387.595373 
 127.183000 35.725444 342.105490 
 127.183111 35.725444 346.814455 
 127.183222 35.725444 350.922677 
 127.183333 35.725444 350.719657 
 127.183556 35.725444 356.631748 
 127.183778 35.725444 369.615486 
 127.183889 35.725444 380.072577 
 127.184000 35.725444 385.419350 
 127.184111 35.725444 390.163583 
 127.183000 35.725556 344.449182 
 127.183111 35.725556 350.508038 
 127.183222 35.725556 353.995811 
 127.183333 35.725556 354.235323 
 127.183556 35.725556 360.578040 
 127.183778 35.725556 373.222265 
 127.183889 35.725556 382.080624 
 127.184000 35.725556 387.378863 
 127.184111 35.725556 393.848657 
 127.183111 35.725556 350.508038 
 127.183222 35.725556 353.995811 
 127.183333 35.725556 354.235323 
 127.183444 35.725556 355.049805 
 127.183667 35.725556 365.586346 
 127.183889 35.725556 382.080624 
 127.184000 35.725556 387.378863 
 127.184111 35.725556 393.848657 
 127.184222 35.725556 402.170729 
 127.183111 35.725667 353.581510 
 127.183222 35.725667 355.743227 
 127.183333 35.725667 356.440503 
 127.183444 35.725667 358.943786 
 127.183667 35.725667 371.394108 
 127.183889 35.725667 383.771028 
 127.184000 35.725667 390.211049 
 127.184111 35.725667 398.229591 
 127.184222 35.725667 404.726141 
 127.183111 35.725778 355.451841 
 127.183222 35.725778 356.719978 
 127.183333 35.725778 358.129034 
 127.183444 35.725778 362.556653 
 127.183667 35.725778 375.804945 
 127.183889 35.725778 385.108252 
 127.184000 35.725778 393.852011 
 127.184111 35.725778 402.092144 
 127.184222 35.725778 406.250189 
 127.183111 35.725889 356.435015 
 127.183222 35.725889 357.539478 
 127.183333 35.725889 360.113859 
 127.183444 35.725889 365.859847 
 127.183667 35.725889 377.611514 
 127.183889 35.725889 385.790536 
 127.184000 35.725889 397.201742 
 127.184111 35.725889 404.616944 
 127.184222 35.725889 407.143706 
 127.183222 35.725889 357.539478 
 127.183333 35.725889 360.113859 
 127.183444 35.725889 365.859847 
 127.183556 35.725889 372.860267 
 127.183778 35.725889 380.167968 
 127.184000 35.725889 397.201742 
 127.184111 35.725889 404.616944 
 127.184222 35.725889 407.143706 
 127.184333 35.725889 408.628886 
 127.183222 35.726000 358.692723 
 127.183333 35.726000 362.726334 
 127.183444 35.726000 368.405770 
 127.183556 35.726000 373.638695 
 127.183778 35.726000 380.502282 
 127.184000 35.726000 399.134065 
 127.184111 35.726000 405.956019 
 127.184222 35.726000 407.800530 
 127.184333 35.726000 409.473554 
 127.183222 35.726111 360.566935 
 127.183333 35.726111 365.599240 
 127.183444 35.726111 369.997919 
 127.183556 35.726111 373.831060 
 127.183778 35.726111 380.751149 
 127.184000 35.726111 399.732004 
 127.184111 35.726111 406.675069 
 127.184222 35.726111 408.508666 
 127.184333 35.726111 410.544355 
 127.183333 35.726111 365.599240 
 127.183444 35.726111 369.997919 
 127.183556 35.726111 373.831060 
 127.183667 35.726111 378.145973 
 127.183889 35.726111 385.702850 
 127.184111 35.726111 406.675069 
 127.184222 35.726111 408.508666 
 127.184333 35.726111 410.544355 
 127.184444 35.726111 413.099173 
 127.183333 35.726222 367.974113 
 127.183444 35.726222 370.844688 
 127.183556 35.726222 373.871195 
 127.183667 35.726222 378.325684 
 127.183889 35.726222 385.965793 
 127.184111 35.726222 407.228148 
 127.184222 35.726222 409.441973 
 127.184333 35.726222 411.757929 
 127.184444 35.726222 413.990682 
 127.183333 35.726333 369.505370 
 127.183444 35.726333 371.284494 
 127.183556 35.726333 374.030425 
 127.183667 35.726333 379.006491 
 127.183889 35.726333 387.177039 
 127.184111 35.726333 407.884669 
 127.184222 35.726333 410.643262 
 127.184333 35.726333 412.937714 
 127.184444 35.726333 414.757385 
 127.183444 35.726333 371.284494 
 127.183556 35.726333 374.030425 
 127.183667 35.726333 379.006491 
 127.183778 35.726333 382.732801 
 127.184000 35.726333 399.527618 
 127.184222 35.726333 410.643262 
 127.184333 35.726333 412.937714 
 127.184444 35.726333 414.757385 
 127.184556 35.726333 416.764877 
 127.183444 35.726445 371.593978 
 127.183556 35.726445 374.609845 
 127.183667 35.726445 380.742489 
 127.183778 35.726445 385.480243 
 127.184000 35.726445 399.663528 
 127.184222 35.726445 411.965921 
 127.184333 35.726445 413.926706 
 127.184444 35.726445 415.497710 
 127.184556 35.726445 418.208180 
 127.183444 35.726556 372.017259 
 127.183556 35.726556 376.085726 
 127.183667 35.726556 384.070027 
 127.183778 35.726556 389.484447 
 127.184000 35.726556 400.171937 
 127.184222 35.726556 413.164111 
 127.184333 35.726556 414.709498 
 127.184444 35.726556 416.377309 
 127.184556 35.726556 420.309308 
 127.183444 35.726667 372.883985 
 127.183556 35.726667 379.126237 
 127.183667 35.726667 388.694567 
 127.183778 35.726667 393.466902 
 127.184000 35.726667 400.926318 
 127.184222 35.726667 414.134869 
 127.184333 35.726667 415.412674 
 127.184444 35.726667 417.607431 
 127.184556 35.726667 423.187380 
 127.183556 35.726667 379.126237 
 127.183667 35.726667 388.694567 
 127.183778 35.726667 393.466902 
 127.183889 35.726667 395.984558 
 127.184111 35.726667 410.280863 
 127.184333 35.726667 415.412674 
 127.184444 35.726667 417.607431 
 127.184556 35.726667 423.187380 
 127.184667 35.726667 431.931598 
 127.183556 35.726778 384.004576 
 127.183667 35.726778 393.049763 
 127.183778 35.726778 396.185995 
 127.183889 35.726778 397.867425 
 127.184111 35.726778 411.113477 
 127.184333 35.726778 416.238033 
 127.184444 35.726778 419.403196 
 127.184556 35.726778 426.708041 
 127.184667 35.726778 435.185930 
 127.183556 35.726889 389.608327 
 127.183667 35.726889 395.925988 
 127.183778 35.726889 397.671695 
 127.183889 35.726889 399.146669 
 127.184111 35.726889 412.675029 
 127.184333 35.726889 417.436916 
 127.184444 35.726889 421.929327 
 127.184556 35.726889 430.468349 
 127.184667 35.726889 437.674532 
 127.183667 35.726889 395.925988 
 127.183778 35.726889 397.671695 
 127.183889 35.726889 399.146669 
 127.184000 35.726889 403.613789 
 127.184222 35.726889 416.248586 
 127.184444 35.726889 421.929327 
 127.184556 35.726889 430.468349 
 127.184667 35.726889 437.674532 
 127.184778 35.726889 440.877852 
 127.183667 35.727000 397.426339 
 127.183778 35.727000 398.522825 
 127.183889 35.727000 400.432227 
 127.184000 35.727000 406.220996 
 127.184222 35.727000 418.093224 
 127.184444 35.727000 425.139084 
 127.184556 35.727000 433.919291 
 127.184667 35.727000 439.402673 
 127.184778 35.727000 441.574322 
 127.183667 35.727111 398.188053 
 127.183778 35.727111 399.269309 
 127.183889 35.727111 402.255234 
 127.184000 35.727111 409.840358 
 127.184222 35.727111 420.436972 
 127.184444 35.727111 428.701243 
 127.184556 35.727111 436.698339 
 127.184667 35.727111 440.554736 
 127.184778 35.727111 442.224805 
 127.183778 35.727111 399.269309 
 127.183889 35.727111 402.255234 
 127.184000 35.727111 409.840358 
 127.184111 35.727111 418.239465 
 127.184333 35.727111 421.706154 
 127.184556 35.727111 436.698339 
 127.184667 35.727111 440.554736 
 127.184778 35.727111 442.224805 
 127.184889 35.727111 445.701747 
 127.183778 35.727222 400.307445 
 127.183889 35.727222 405.013468 
 127.184000 35.727222 413.970603 
 127.184111 35.727222 420.839467 
 127.184333 35.727222 424.466352 
 127.184556 35.727222 438.726506 
 127.184667 35.727222 441.351241 
 127.184778 35.727222 443.100281 
 127.184889 35.727222 449.470079 
 127.183778 35.727333 402.023266 
 127.183889 35.727333 408.829501 
 127.184000 35.727333 417.789217 
 127.184111 35.727333 422.667761 
 127.184333 35.727333 427.044779 
 127.184556 35.727333 440.194391 
 127.184667 35.727333 442.025390 
 127.184778 35.727333 444.526154 
 127.184889 35.727333 454.761107 
 127.183889 35.727333 408.829501 
 127.184000 35.727333 417.789217 
 127.184111 35.727333 422.667761 
 127.184222 35.727333 424.235002 
 127.184444 35.727333 434.935665 
 127.184667 35.727333 442.025390 
 127.184778 35.727333 444.526154 
 127.184889 35.727333 454.761107 
 127.185000 35.727333 471.586337 
 127.183889 35.727445 413.249451 
 127.184000 35.727445 420.687830 
 127.184111 35.727445 423.858652 
 127.184222 35.727445 425.511602 
 127.184444 35.727445 437.477194 
 127.184667 35.727445 442.823419 
 127.184778 35.727445 446.723146 
 127.184889 35.727445 460.127150 
 127.185000 35.727445 474.955308 
 127.183889 35.727556 417.368359 
 127.184000 35.727556 422.599972 
 127.184111 35.727556 424.728674 
 127.184222 35.727556 426.910755 
 127.184444 35.727556 440.309767 
 127.184667 35.727556 443.989971 
 127.184778 35.727556 449.396077 
 127.184889 35.727556 463.712379 
 127.185000 35.727556 476.119434 
 127.183889 35.727667 420.499194 
 127.184000 35.727667 423.811805 
 127.184111 35.727667 425.603571 
 127.184222 35.727667 428.904833 
 127.184444 35.727667 443.677766 
 127.184667 35.727667 445.591261 
 127.184778 35.727667 451.580602 
 127.184889 35.727667 464.803983 
 127.185000 35.727667 475.769277 
 127.184000 35.727667 423.811805 
 127.184111 35.727667 425.603571 
 127.184222 35.727667 428.904833 
 127.184333 35.727667 436.222998 
 127.184556 35.727667 445.026714 
 127.184778 35.727667 451.580602 
 127.184889 35.727667 464.803983 
 127.185000 35.727667 475.769277 
 127.185111 35.727667 480.842188 
 127.184000 35.727778 424.672755 
 127.184111 35.727778 426.798162 
 127.184222 35.727778 431.835963 
 127.184333 35.727778 440.532914 
 127.184556 35.727778 447.419123 
 127.184778 35.727778 452.455992 
 127.184889 35.727778 463.811175 
 127.185000 35.727778 474.333804 
 127.185111 35.727778 480.164995 
 127.184000 35.727889 425.511462 
 127.184111 35.727889 428.651444 
 127.184222 35.727889 435.745479 
 127.184333 35.727889 444.552026 
 127.184556 35.727889 449.434390 
 127.184778 35.727889 452.177472 
 127.184889 35.727889 461.527068 
 127.185000 35.727889 472.078055 
 127.185111 35.727889 479.417457 
 127.184111 35.727889 428.651444 
 127.184222 35.727889 435.745479 
 127.184333 35.727889 444.552026 
 127.184444 35.727889 449.286491 
 127.184667 35.727889 448.566644 
 127.184889 35.727889 461.527068 
 127.185000 35.727889 472.078055 
 127.185111 35.727889 479.417457 
 127.185222 35.727889 485.327301 
 127.184111 35.728000 431.448795 
 127.184222 35.728000 440.140682 
 127.184333 35.728000 447.645244 
 127.184444 35.728000 450.809275 
 127.184667 35.728000 449.611177 
 127.184889 35.728000 458.758021 
 127.185000 35.728000 469.371379 
 127.185111 35.728000 479.112391 
 127.185222 35.728000 487.790464 
 127.184111 35.728111 435.245590 
 127.184222 35.728111 444.230135 
 127.184333 35.728111 449.735149 
 127.184444 35.728111 451.850621 
 127.184667 35.728111 451.101638 
 127.184889 35.728111 456.243038 
 127.185000 35.728111 466.910118 
 127.185111 35.728111 480.049914 
 127.185222 35.728111 490.755121 
 127.184222 35.728111 444.230135 
 127.184333 35.728111 449.735149 
 127.184444 35.728111 451.850621 
 127.184556 35.728111 452.423889 
 127.184778 35.728111 451.113399 
 127.185000 35.728111 466.910118 
 127.185111 35.728111 480.049914 
 127.185222 35.728111 490.755121 
 127.185333 35.728111 495.723494 
 127.184222 35.728222 447.406937 
 127.184333 35.728222 451.078532 
 127.184444 35.728222 452.867704 
 127.184556 35.728222 454.792785 
 127.184778 35.728222 451.935636 
 127.185000 35.728222 465.780573 
 127.185111 35.728222 482.643803 
 127.185222 35.728222 493.248312 
 127.185333 35.728222 496.780361 
 127.184222 35.728333 449.563661 
 127.184333 35.728333 452.033973 
 127.184444 35.728333 454.387239 
 127.184556 35.728333 459.022201 
 127.184778 35.728333 455.175594 
 127.185000 35.728333 467.035333 
 127.185111 35.728333 486.190763 
 127.185222 35.728333 494.945777 
 127.185333 35.728333 497.687249 
 127.184222 35.728445 450.940753 
 127.184333 35.728445 452.969552 
 127.184444 35.728445 457.062563 
 127.184556 35.728445 465.633973 
 127.184778 35.728445 462.238468 
 127.185000 35.728445 471.227248 
 127.185111 35.728445 489.653553 
 127.185222 35.728445 496.111947 
 127.185333 35.728445 498.818766 
 127.184333 35.728445 452.969552 
 127.184444 35.728445 457.062563 
 127.184556 35.728445 465.633973 
 127.184667 35.728445 468.974449 
 127.184889 35.728445 458.820627 
 127.185111 35.728445 489.653553 
 127.185222 35.728445 496.111947 
 127.185333 35.728445 498.818766 
 127.185444 35.728445 504.501770 
 127.184333 35.728556 454.272337 
 127.184444 35.728556 461.477124 
 127.184556 35.728556 473.597780 
 127.184667 35.728556 478.329234 
 127.184889 35.728556 467.862179 
 127.185111 35.728556 492.683958 
 127.185222 35.728556 497.126986 
 127.185333 35.728556 500.515976 
 127.185444 35.728556 508.263521 
 127.184333 35.728667 456.387836 
 127.184444 35.728667 467.629775 
 127.184556 35.728667 480.837668 
 127.184667 35.728667 485.593757 
 127.184889 35.728667 482.472682 
 127.185111 35.728667 495.727575 
 127.185222 35.728667 498.386219 
 127.185333 35.728667 503.094885 
 127.185444 35.728667 512.386317 
 127.184444 35.728667 467.629775 
 127.184556 35.728667 480.837668 
 127.184667 35.728667 485.593757 
 127.184778 35.728667 484.017495 
 127.185000 35.728667 488.984143 
 127.185222 35.728667 498.386219 
 127.185333 35.728667 503.094885 
 127.185444 35.728667 512.386317 
 127.185556 35.728667 519.949556 
 127.184444 35.728778 474.463864 
 127.184556 35.728778 486.082606 
 127.184667 35.728778 490.390488 
 127.184778 35.728778 493.103672 
 127.185000 35.728778 501.468008 
 127.185222 35.728778 500.364405 
 127.185333 35.728778 506.670939 
 127.185444 35.728778 516.160416 
 127.185556 35.728778 521.720018 
 127.184444 35.728889 480.581700 
 127.184556 35.728889 489.533179 
 127.184667 35.728889 493.790641 
 127.184778 35.728889 500.151307 
 127.185000 35.728889 512.558721 
 127.185222 35.728889 503.728741 
 127.185333 35.728889 510.979797 
 127.185444 35.728889 519.170616 
 127.185556 35.728889 523.181528 
 127.184556 35.728889 489.533179 
 127.184667 35.728889 493.790641 
 127.184778 35.728889 500.151307 
 127.184889 35.728889 509.643304 
 127.185111 35.728889 505.776761 
 127.185333 35.728889 510.979797 
 127.185444 35.728889 519.170616 
 127.185556 35.728889 523.181528 
 127.185667 35.728889 526.229169 
 127.184556 35.729000 491.950772 
 127.184667 35.729000 496.906321 
 127.184778 35.729000 506.137573 
 127.184889 35.729000 516.621140 
 127.185111 35.729000 513.722229 
 127.185333 35.729000 515.391131 
 127.185444 35.729000 521.464691 
 127.185556 35.729000 524.778065 
 127.185667 35.729000 528.983112 
 127.184556 35.729111 494.117709 
 127.184667 35.729111 500.552137 
 127.184778 35.729111 511.563015 
 127.184889 35.729111 520.642771 
 127.185111 35.729111 521.391275 
 127.185333 35.729111 519.459081 
 127.185444 35.729111 523.463673 
 127.185556 35.729111 527.040253 
 127.185667 35.729111 533.187354 
 127.184667 35.729111 500.552137 
 127.184778 35.729111 511.563015 
 127.184889 35.729111 520.642771 
 127.185000 35.729111 523.558533 
 127.185222 35.729111 516.753899 
 127.185444 35.729111 523.463673 
 127.185556 35.729111 527.040253 
 127.185667 35.729111 533.187354 
 127.185778 35.729111 543.129868 
 127.184667 35.729222 505.100195 
 127.184778 35.729222 516.253544 
 127.184889 35.729222 523.055855 
 127.185000 35.729222 525.811162 
 127.185222 35.729222 524.732725 
 127.185444 35.729222 525.758984 
 127.185556 35.729222 530.542336 
 127.185667 35.729222 538.885207 
 127.185778 35.729222 549.048070 
 127.184667 35.729333 510.310711 
 127.184778 35.729333 519.900280 
 127.184889 35.729333 524.672052 
 127.185000 35.729333 527.571730 
 127.185222 35.729333 530.798547 
 127.185444 35.729333 529.007412 
 127.185556 35.729333 535.654950 
 127.185667 35.729333 545.287202 
 127.185778 35.729333 553.709481 
 127.184667 35.729444 515.390541 
 127.184778 35.729444 522.482447 
 127.184889 35.729444 525.991500 
 127.185000 35.729444 529.345266 
 127.185222 35.729444 534.363686 
 127.185444 35.729444 533.658876 
 127.185556 35.729444 542.040115 
 127.185667 35.729444 551.062449 
 127.185778 35.729444 556.731157 
 127.184778 35.729444 522.482447 
 127.184889 35.729444 525.991500 
 127.185000 35.729444 529.345266 
 127.185111 35.729444 533.096462 
 127.185333 35.729444 531.525775 
 127.185556 35.729444 542.040115 
 127.185667 35.729444 551.062449 
 127.185778 35.729444 556.731157 
 127.185889 35.729444 558.296530 
 127.184778 35.729555 524.249987 
 127.184889 35.729555 527.324227 
 127.185000 35.729555 531.210138 
 127.185111 35.729555 534.833161 
 127.185333 35.729555 535.056833 
 127.185556 35.729555 548.346809 
 127.185667 35.729555 555.229523 
 127.185778 35.729555 558.319418 
 127.185889 35.729555 557.952516 
 127.184778 35.729667 525.578117 
 127.184889 35.729667 528.842983 
 127.185000 35.729667 533.018421 
 127.185111 35.729667 535.976209 
 127.185333 35.729667 536.870512 
 127.185556 35.729667 553.084180 
 127.185667 35.729667 557.702792 
 127.185778 35.729667 558.866769 
 127.185889 35.729667 556.902875 
 127.184889 35.729667 528.842983 
 127.185000 35.729667 533.018421 
 127.185111 35.729667 535.976209 
 127.185222 35.729667 536.805578 
 127.185444 35.729667 543.751521 
 127.185667 35.729667 557.702792 
 127.185778 35.729667 558.866769 
 127.185889 35.729667 556.902875 
 127.186000 35.729667 552.509070 
 127.184889 35.729778 530.548903 
 127.185000 35.729778 534.550571 
 127.185111 35.729778 536.606088 
 127.185222 35.729778 536.755961 
 127.185444 35.729778 545.110759 
 127.185667 35.729778 558.836664 
 127.185778 35.729778 558.656460 
 127.185889 35.729778 555.358639 
 127.186000 35.729778 550.850809 
 127.184889 35.729889 532.302710 
 127.185000 35.729889 535.670815 
 127.185111 35.729889 536.766961 
 127.185222 35.729889 536.104568 
 127.185444 35.729889 542.903398 
 127.185667 35.729889 558.924759 
 127.185778 35.729889 557.821327 
 127.185889 35.729889 553.580263 
 127.186000 35.729889 549.544931 
 127.185000 35.729889 535.670815 
 127.185111 35.729889 536.766961 
 127.185222 35.729889 536.104568 
 127.185333 35.729889 535.479208 
 127.185556 35.729889 555.326496 
 127.185778 35.729889 557.821327 
 127.185889 35.729889 553.580263 
 127.186000 35.729889 549.544931 
 127.186111 35.729889 547.377634 
 127.185000 35.730000 536.326034 
 127.185111 35.730000 536.450993 
 127.185222 35.730000 534.959348 
 127.185333 35.730000 533.724578 
 127.185556 35.730000 552.383515 
 127.185778 35.730000 556.366983 
 127.185889 35.730000 551.836796 
 127.186000 35.730000 548.541980 
 127.186111 35.730000 546.273360 
 127.185000 35.730111 536.501641 
 127.185111 35.730111 535.650224 
 127.185222 35.730111 533.575568 
 127.185333 35.730111 532.179545 
 127.185556 35.730111 546.409930 
 127.185778 35.730111 554.148473 
 127.185889 35.730111 550.269850 
 127.186000 35.730111 547.661639 
 127.186111 35.730111 544.373777 
 127.185111 35.730111 535.650224 
 127.185222 35.730111 533.575568 
 127.185333 35.730111 532.179545 
 127.185444 35.730111 534.832973 
 127.185667 35.730111 554.683057 
 127.185889 35.730111 550.269850 
 127.186000 35.730111 547.661639 
 127.186111 35.730111 544.373777 
 127.186222 35.730111 535.184561 
 127.185111 35.730222 534.459513 
 127.185222 35.730222 532.285623 
 127.185333 35.730222 531.028753 
 127.185444 35.730222 531.691885 
 127.185667 35.730222 547.849776 
 127.185889 35.730222 548.771257 
 127.186000 35.730222 546.613318 
 127.186111 35.730222 541.017876 
 127.186222 35.730222 527.264248 
 127.185111 35.730333 533.145198 
 127.185222 35.730333 531.292547 
 127.185333 35.730333 530.155201 
 127.185444 35.730333 529.213954 
 127.185667 35.730333 537.240243 
 127.185889 35.730333 546.851718 
 127.186000 35.730333 544.955564 
 127.186111 35.730333 535.737913 
 127.186222 35.730333 519.291553 
 127.185111 35.730444 531.993413 
 127.185222 35.730444 530.576496 
 127.185333 35.730444 529.331263 
 127.185444 35.730444 526.971359 
 127.185667 35.730444 526.821027 
 127.185889 35.730444 543.226580 
 127.186000 35.730444 541.942650 
 127.186111 35.730444 528.736649 
 127.186222 35.730444 512.786346 
 127.185222 35.730444 530.576496 
 127.185333 35.730444 529.331263 
 127.185444 35.730444 526.971359 
 127.185556 35.730444 524.584609 
 127.185778 35.730444 535.957861 
 127.186000 35.730444 541.942650 
 127.186111 35.730444 528.736649 
 127.186222 35.730444 512.786346 
 127.186333 35.730444 505.472989 
 127.185222 35.730555 530.002505 
 127.185333 35.730555 528.333370 
 127.185444 35.730555 524.749587 
 127.185556 35.730555 521.032008 
 127.185778 35.730555 524.361454 
 127.186000 35.730555 536.355237 
 127.186111 35.730555 520.979956 
 127.186222 35.730555 507.795886 
 127.186333 35.730555 502.350234 
 127.185222 35.730667 529.395579 
 127.185333 35.730667 526.978085 
 127.185444 35.730667 522.599623 
 127.185556 35.730667 518.811885 
 127.185778 35.730667 513.027638 
 127.186000 35.730667 526.535692 
 127.186111 35.730667 513.211795 
 127.186222 35.730667 503.315413 
 127.186333 35.730667 498.457451 
 127.185333 35.730667 526.978085 
 127.185444 35.730667 522.599623 
 127.185556 35.730667 518.811885 
 127.185667 35.730667 515.516907 
 127.185889 35.730667 520.915278 
 127.186111 35.730667 513.211795 
 127.186222 35.730667 503.315413 
 127.186333 35.730667 498.457451 
 127.186444 35.730667 492.619514 
 127.185333 35.730778 525.216509 
 127.185444 35.730778 520.705449 
 127.185556 35.730778 517.137253 
 127.185667 35.730778 512.007471 
 127.185889 35.730778 503.908783 
 127.186111 35.730778 505.306161 
 127.186222 35.730778 498.135774 
 127.186333 35.730778 493.014331 
 127.186444 35.730778 485.933424 
 127.185333 35.730889 523.218054 
 127.185444 35.730889 519.140784 
 127.185556 35.730889 515.460976 
 127.185667 35.730889 508.299384 
 127.185889 35.730889 491.778603 
 127.186111 35.730889 496.707985 
 127.186222 35.730889 491.503117 
 127.186333 35.730889 486.163255 
 127.186444 35.730889 479.249447 
 127.185444 35.730889 519.140784 
 127.185556 35.730889 515.460976 
 127.185667 35.730889 508.299384 
 127.185778 35.730889 497.024450 
 127.186000 35.730889 497.180282 
 127.186222 35.730889 491.503117 
 127.186333 35.730889 486.163255 
 127.186444 35.730889 479.249447 
 127.186556 35.730889 472.194480 
 127.185444 35.731000 517.783371 
 127.185556 35.731000 513.379703 
 127.185667 35.731000 504.005340 
 127.185778 35.731000 491.759600 
 127.186000 35.731000 486.655451 
 127.186222 35.731000 483.947111 
 127.186333 35.731000 479.318328 
 127.186444 35.731000 474.188113 
 127.186556 35.731000 470.497730 
 127.185444 35.731111 516.397350 
 127.185556 35.731111 510.596048 
 127.185667 35.731111 499.244261 
 127.185778 35.731111 487.742730 
 127.186000 35.731111 480.821157 
 127.186222 35.731111 477.253541 
 127.186333 35.731111 474.049862 
 127.186444 35.731111 471.072622 
 127.186556 35.731111 469.740652 
 127.185556 35.731111 510.596048 
 127.185667 35.731111 499.244261 
 127.185778 35.731111 487.742730 
 127.185889 35.731111 482.223421 
 127.186111 35.731111 480.038159 
 127.186333 35.731111 474.049862 
 127.186444 35.731111 471.072622 
 127.186556 35.731111 469.740652 
 127.186667 35.731111 469.740322 
 127.185556 35.731222 506.921111 
 127.185667 35.731222 494.409663 
 127.185778 35.731222 484.603599 
 127.185889 35.731222 479.830083 
 127.186111 35.731222 474.417824 
 127.186333 35.731222 470.467956 
 127.186444 35.731222 469.026523 
 127.186556 35.731222 469.235874 
 127.186667 35.731222 469.688373 
 127.185556 35.731333 502.418391 
 127.185667 35.731333 489.966027 
 127.185778 35.731333 481.875163 
 127.185889 35.731333 476.883497 
 127.186111 35.731333 469.898882 
 127.186333 35.731333 467.491433 
 127.186444 35.731333 466.916407 
 127.186556 35.731333 468.551781 
 127.186667 35.731333 469.619274 
 127.185667 35.731333 489.966027 
 127.185778 35.731333 481.875163 
 127.185889 35.731333 476.883497 
 127.186000 35.731333 472.321268 
 127.186222 35.731333 469.111071 
 127.186444 35.731333 466.916407 
 127.186556 35.731333 468.551781 
 127.186667 35.731333 469.619274 
 127.186778 35.731333 470.152290 
 127.185667 35.731444 486.109058 
 127.185778 35.731444 478.910476 
 127.185889 35.731444 472.546687 
 127.186000 35.731444 466.677074 
 127.186222 35.731444 465.690939 
 127.186444 35.731444 463.838264 
 127.186556 35.731444 467.303371 
 127.186667 35.731444 469.534524 
 127.186778 35.731444 470.713744 
 127.185667 35.731555 482.710852 
 127.185778 35.731555 475.108515 
 127.185889 35.731555 467.090502 
 127.186000 35.731555 461.171490 
 127.186222 35.731555 461.350958 
 127.186444 35.731555 459.737638 
 127.186556 35.731555 465.150557 
 127.186667 35.731555 469.494821 
 127.186778 35.731555 471.593265 
 127.185667 35.731667 479.364388 
 127.185778 35.731667 470.343543 
 127.185889 35.731667 461.836878 
 127.186000 35.731667 457.058228 
 127.186222 35.731667 456.507155 
 127.186444 35.731667 455.664969 
 127.186556 35.731667 462.126332 
 127.186667 35.731667 469.620333 
 127.186778 35.731667 472.428785 
 127.185778 35.731667 470.343543 
 127.185889 35.731667 461.836878 
 127.186000 35.731667 457.058228 
 127.186111 35.731667 455.703808 
 127.186333 35.731667 455.085811 
 127.186556 35.731667 462.126332 
 127.186667 35.731667 469.620333 
 127.186778 35.731667 472.428785 
 127.186889 35.731667 473.258087 
 127.185778 35.731778 465.320633 
 127.185889 35.731778 457.888867 
 127.186000 35.731778 454.321486 
 127.186111 35.731778 451.881198 
 127.186333 35.731778 452.125528 
 127.186556 35.731778 459.000179 
 127.186667 35.731778 469.916445 
 127.186778 35.731778 472.931037 
 127.186889 35.731778 473.642921 
 127.185778 35.731889 461.016860 
 127.185889 35.731889 455.320443 
 127.186000 35.731889 452.157841 
 127.186111 35.731889 447.757636 
 127.186333 35.731889 450.266477 
 127.186556 35.731889 456.565910 
 127.186667 35.731889 470.077007 
 127.186778 35.731889 473.107884 
 127.186889 35.731889 474.172204 
 127.185889 35.731889 455.320443 
 127.186000 35.731889 452.157841 
 127.186111 35.731889 447.757636 
 127.186222 35.731889 447.766446 
 127.186444 35.731889 450.990991 
 127.186667 35.731889 470.077007 
 127.186778 35.731889 473.107884 
 127.186889 35.731889 474.172204 
 127.187000 35.731889 481.831676 
 127.185889 35.732000 453.635171 
 127.186000 35.732000 449.698757 
 127.186111 35.732000 443.495993 
 127.186222 35.732000 443.655790 
 127.186444 35.732000 449.944801 
 127.186667 35.732000 469.346686 
 127.186778 35.732000 472.811875 
 127.186889 35.732000 474.762510 
 127.187000 35.732000 483.726060 
 127.185889 35.732111 452.299860 
 127.186000 35.732111 446.614017 
 127.186111 35.732111 440.246562 
 127.186222 35.732111 440.272349 
 127.186444 35.732111 448.922473 
 127.186667 35.732111 466.026774 
 127.186778 35.732111 470.970839 
 127.186889 35.732111 474.282980 
 127.187000 35.732111 483.494663 
 127.186000 35.732111 446.614017 
 127.186111 35.732111 440.246562 
 127.186222 35.732111 440.272349 
 127.186333 35.732111 446.119003 
 127.186556 35.732111 452.280918 
 127.186778 35.732111 470.970839 
 127.186889 35.732111 474.282980 
 127.187000 35.732111 483.494663 
 127.187111 35.732111 485.897388 
 127.186000 35.732222 443.421410 
 127.186111 35.732222 438.308338 
 127.186222 35.732222 437.874318 
 127.186333 35.732222 442.309580 
 127.186556 35.732222 450.160240 
 127.186778 35.732222 465.751032 
 127.186889 35.732222 471.047410 
 127.187000 35.732222 480.920561 
 127.187111 35.732222 483.927555 
 127.186000 35.732333 440.882559 
 127.186111 35.732333 437.212050 
 127.186222 35.732333 436.206449 
 127.186333 35.732333 438.954850 
 127.186556 35.732333 449.111791 
 127.186778 35.732333 459.853538 
 127.186889 35.732333 466.338665 
 127.187000 35.732333 475.829270 
 127.187111 35.732333 480.171371 
 127.186111 35.732333 437.212050 
 127.186222 35.732333 436.206449 
 127.186333 35.732333 438.954850 
 127.186444 35.732333 446.352830 
 127.186667 35.732333 455.010628 
 127.186889 35.732333 466.338665 
 127.187000 35.732333 475.829270 
 127.187111 35.732333 480.171371 
 127.187222 35.732333 476.694922 
 127.186111 35.732444 436.467359 
 127.186222 35.732444 435.050371 
 127.186333 35.732444 437.141545 
 127.186444 35.732444 445.492997 
 127.186667 35.732444 453.347554 
 127.186889 35.732444 463.157438 
 127.187000 35.732444 469.991920 
 127.187111 35.732444 475.853225 
 127.187222 35.732444 475.651620 
 127.186111 35.732556 435.801233 
 127.186222 35.732556 434.332783 
 127.186333 35.732556 436.345480 
 127.186444 35.732556 444.839554 
 127.186667 35.732556 452.799538 
 127.186889 35.732556 461.831157 
 127.187000 35.732556 466.314296 
 127.187111 35.732556 473.416041 
 127.187222 35.732556 475.256074 
 127.186222 35.732556 434.332783 
 127.186333 35.732556 436.345480 
 127.186444 35.732556 444.839554 
 127.186556 35.732556 448.582141 
 127.186778 35.732556 456.117816 
 127.187000 35.732556 466.314296 
 127.187111 35.732556 473.416041 
 127.187222 35.732556 475.256074 
 127.187333 35.732556 475.088037 
 127.186222 35.732667 433.971413 
 127.186333 35.732667 436.106092 
 127.186444 35.732667 443.836716 
 127.186556 35.732667 447.933427 
 127.186778 35.732667 455.708345 
 127.187000 35.732667 464.919513 
 127.187111 35.732667 472.538621 
 127.187222 35.732667 474.924242 
 127.187333 35.732667 474.459269 
 127.186222 35.732778 433.968286 
 127.186333 35.732778 436.362000 
 127.186444 35.732778 441.590805 
 127.186556 35.732778 445.929386 
 127.186778 35.732778 454.688317 
 127.187000 35.732778 464.105277 
 127.187111 35.732778 471.399395 
 127.187222 35.732778 474.161006 
 127.187333 35.732778 473.230860 
 127.186333 35.732889 436.897828 
 127.186444 35.732889 439.271817 
 127.186556 35.732889 443.490737 
 127.186667 35.732889 446.003395 
 127.186889 35.732889 460.457952 
 127.187111 35.732889 468.565190 
 127.187222 35.732889 472.506101 
 127.187333 35.732889 471.808743 
 127.187444 35.732889 471.810453 
 127.186333 35.733000 437.172041 
 127.186444 35.733000 438.375006 
 127.186556 35.733000 442.639273 
 127.186667 35.733000 444.647589 
 127.186889 35.733000 459.561758 
 127.187111 35.733000 464.750412 
 127.187222 35.733000 470.297703 
 127.187333 35.733000 470.993305 
 127.187444 35.733000 472.478510 
 127.186333 35.733111 437.243894 
 127.186444 35.733111 438.308019 
 127.186556 35.733111 443.085879 
 127.186667 35.733111 445.326075 
 127.186889 35.733111 459.342358 
 127.187111 35.733111 462.310379 
 127.187222 35.733111 468.767514 
 127.187333 35.733111 470.968726 
 127.187444 35.733111 474.037178 
 127.186444 35.733111 438.308019 
 127.186556 35.733111 443.085879 
 127.186667 35.733111 445.326075 
 127.186778 35.733111 449.507306 
 127.187000 35.733111 460.153969 
 127.187222 35.733111 468.767514 
 127.187333 35.733111 470.968726 
 127.187444 35.733111 474.037178 
 127.187556 35.733111 486.475939 
 127.186444 35.733222 438.702239 
 127.186556 35.733222 444.696244 
 127.186667 35.733222 447.652412 
 127.186778 35.733222 452.455724 
 127.187000 35.733222 459.997398 
 127.187222 35.733222 468.381503 
 127.187333 35.733222 471.759832 
 127.187444 35.733222 476.813700 
 127.187556 35.733222 489.877506 
 127.186444 35.733333 439.834254 
 127.186556 35.733333 447.680928 
 127.186667 35.733333 451.084296 
 127.186778 35.733333 456.415663 
 127.187000 35.733333 460.197529 
 127.187222 35.733333 469.357436 
 127.187333 35.733333 473.871691 
 127.187444 35.733333 480.923739 
 127.187556 35.733333 492.349725 
 127.186556 35.733333 447.680928 
 127.186667 35.733333 451.084296 
 127.186778 35.733333 456.415663 
 127.186889 35.733333 460.916764 
 127.187111 35.733333 461.489509 
 127.187333 35.733333 473.871691 
 127.187444 35.733333 480.923739 
 127.187556 35.733333 492.349725 
 127.187667 35.733333 495.613739 
 127.186556 35.733444 451.112076 
 127.186667 35.733444 454.114416 
 127.186778 35.733444 459.714150 
 127.186889 35.733444 462.967807 
 127.187111 35.733444 462.679125 
 127.187333 35.733444 477.910891 
 127.187444 35.733444 485.381257 
 127.187556 35.733444 493.768035 
 127.187667 35.733444 495.806378 
 127.186556 35.733556 453.565445 
 127.186667 35.733556 456.200586 
 127.186778 35.733556 462.108433 
 127.186889 35.733556 465.844885 
 127.187111 35.733556 466.661029 
 127.187333 35.733556 482.644335 
 127.187444 35.733556 488.431122 
 127.187556 35.733556 494.405233 
 127.187667 35.733556 496.072449 
 127.186667 35.733556 456.200586 
 127.186778 35.733556 462.108433 
 127.186889 35.733556 465.844885 
 127.187000 35.733556 465.032448 
 127.187222 35.733556 478.065242 
 127.187444 35.733556 488.431122 
 127.187556 35.733556 494.405233 
 127.187667 35.733556 496.072449 
 127.187778 35.733556 496.134602 
 127.186667 35.733667 457.833635 
 127.186778 35.733667 464.114878 
 127.186889 35.733667 469.565223 
 127.187000 35.733667 472.606153 
 127.187222 35.733667 483.161759 
 127.187444 35.733667 489.548612 
 127.187556 35.733667 494.711575 
 127.187667 35.733667 496.710593 
 127.187778 35.733667 496.622392 
 127.186667 35.733778 459.512844 
 127.186778 35.733778 466.316506 
 127.186889 35.733778 473.964506 
 127.187000 35.733778 479.488300 
 127.187222 35.733778 486.082802 
 127.187444 35.733778 489.690218 
 127.187556 35.733778 495.317854 
 127.187667 35.733778 498.261759 
 127.187778 35.733778 497.556998 
 127.186778 35.733778 466.316506 
 127.186889 35.733778 473.964506 
 127.187000 35.733778 479.488300 
 127.187111 35.733778 483.435509 
 127.187333 35.733778 486.596188 
 127.187556 35.733778 495.317854 
 127.187667 35.733778 498.261759 
 127.187778 35.733778 497.556998 
 127.187889 35.733778 494.910248 
 127.186778 35.733889 469.257367 
 127.186889 35.733889 478.043344 
 127.187000 35.733889 483.074241 
 127.187111 35.733889 487.397162 
 127.187333 35.733889 487.039644 
 127.187556 35.733889 497.064750 
 127.187667 35.733889 501.130335 
 127.187778 35.733889 498.889093 
 127.187889 35.733889 495.205726 
 127.186778 35.734000 473.101301 
 127.186889 35.734000 480.931119 
 127.187000 35.734000 484.993059 
 127.187111 35.734000 489.068613 
 127.187333 35.734000 487.728452 
 127.187556 35.734000 500.437659 
 127.187667 35.734000 504.623067 
 127.187778 35.734000 500.433554 
 127.187889 35.734000 495.599249 
 127.186889 35.734000 480.931119 
 127.187000 35.734000 484.993059 
 127.187111 35.734000 489.068613 
 127.187222 35.734000 488.756415 
 127.187444 35.734000 491.124446 
 127.187667 35.734000 504.623067 
 127.187778 35.734000 500.433554 
 127.187889 35.734000 495.599249 
 127.188000 35.734000 493.948569 
 127.186889 35.734111 482.740253 
 127.187000 35.734111 486.945703 
 127.187111 35.734111 490.464320 
 127.187222 35.734111 490.309758 
 127.187444 35.734111 493.998998 
 127.187667 35.734111 507.412027 
 127.187778 35.734111 501.972636 
 127.187889 35.734111 495.943812 
 127.188000 35.734111 493.592773 
 127.186889 35.734222 484.643271 
 127.187000 35.734222 491.566110 
 127.187111 35.734222 493.649229 
 127.187222 35.734222 493.968498 
 127.187444 35.734222 499.304943 
 127.187667 35.734222 509.106693 
 127.187778 35.734222 503.189486 
 127.187889 35.734222 495.779595 
 127.188000 35.734222 492.149143 
 127.187000 35.734222 491.566110 
 127.187111 35.734222 493.649229 
 127.187222 35.734222 493.968498 
 127.187333 35.734222 495.886372 
 127.187556 35.734222 507.931273 
 127.187778 35.734222 503.189486 
 127.187889 35.734222 495.779595 
 127.188000 35.734222 492.149143 
 127.188111 35.734222 487.694346 
 127.187000 35.734333 501.447265 
 127.187111 35.734333 500.868140 
 127.187222 35.734333 502.219209 
 127.187333 35.734333 507.418860 
 127.187556 35.734333 510.104248 
 127.187778 35.734333 503.501181 
 127.187889 35.734333 494.147772 
 127.188000 35.734333 488.391053 
 127.188111 35.734333 479.357611 
 127.187000 35.734444 509.794130 
 127.187111 35.734444 508.916612 
 127.187222 35.734444 512.785905 
 127.187333 35.734444 517.512285 
 127.187556 35.734444 511.312600 
 127.187778 35.734444 502.164670 
 127.187889 35.734444 490.409510 
 127.188000 35.734444 482.648877 
 127.188111 35.734444 471.067018 
 127.187000 35.734556 513.084064 
 127.187111 35.734556 513.491666 
 127.187222 35.734556 519.507507 
 127.187333 35.734556 521.733762 
 127.187556 35.734556 511.674306 
 127.187778 35.734556 498.798975 
 127.187889 35.734556 485.801160 
 127.188000 35.734556 477.656496 
 127.188111 35.734556 466.371656 
 127.187111 35.734556 513.491666 
 127.187222 35.734556 519.507507 
 127.187333 35.734556 521.733762 
 127.187444 35.734556 516.899759 
 127.187667 35.734556 509.211730 
 127.187889 35.734556 485.801160 
 127.188000 35.734556 477.656496 
 127.188111 35.734556 466.371656 
 127.188222 35.734556 459.546107 
 127.187111 35.734667 515.764932 
 127.187222 35.734667 522.251948 
 127.187333 35.734667 522.385897 
 127.187444 35.734667 516.938324 
 127.187667 35.734667 506.442270 
 127.187889 35.734667 482.134255 
 127.188000 35.734667 474.571935 
 127.188111 35.734667 464.110241 
 127.188222 35.734667 458.395981 
 127.187111 35.734778 517.583875 
 127.187222 35.734778 523.053805 
 127.187333 35.734778 521.185882 
 127.187444 35.734778 514.690083 
 127.187667 35.734778 499.251993 
 127.187889 35.734778 479.643490 
 127.188000 35.734778 472.619477 
 127.188111 35.734778 462.744635 
 127.188222 35.734778 456.837128 
 127.187222 35.734778 523.053805 
 127.187333 35.734778 521.185882 
 127.187444 35.734778 514.690083 
 127.187556 35.734778 507.407166 
 127.187778 35.734778 487.647550 
 127.188000 35.734778 472.619477 
 127.188111 35.734778 462.744635 
 127.188222 35.734778 456.837128 
 127.188333 35.734778 442.368987 
 127.187222 35.734889 522.635050 
 127.187333 35.734889 518.614066 
 127.187444 35.734889 511.776200 
 127.187556 35.734889 502.633264 
 127.187778 35.734889 479.636125 
 127.188000 35.734889 470.966055 
 127.188111 35.734889 461.425439 
 127.188222 35.734889 454.008837 
 127.188333 35.734889 436.242718 
 127.187222 35.735000 520.930165 
 127.187333 35.735000 515.302331 
 127.187444 35.735000 509.143595 
 127.187556 35.735000 497.020850 
 127.187778 35.735000 469.516141 
 127.188000 35.735000 468.617644 
 127.188111 35.735000 459.002713 
 127.188222 35.735000 448.475086 
 127.188333 35.735000 430.913315 
 127.187333 35.735000 515.302331 
 127.187444 35.735000 509.143595 
 127.187556 35.735000 497.020850 
 127.187667 35.735000 474.216880 
 127.187889 35.735000 474.440562 
 127.188111 35.735000 459.002713 
 127.188222 35.735000 448.475086 
 127.188333 35.735000 430.913315 
 127.188444 35.735000 425.317528 
 127.187333 35.735111 512.340606 
 127.187444 35.735111 506.671268 
 127.187556 35.735111 490.470953 
 127.187667 35.735111 465.729631 
 127.187889 35.735111 467.546117 
 127.188111 35.735111 452.337951 
 127.188222 35.735111 438.183687 
 127.188333 35.735111 425.632074 
 127.188444 35.735111 422.724368 
 127.187333 35.735222 510.228093 
 127.187444 35.735222 503.719452 
 127.187556 35.735222 482.939799 
 127.187667 35.735222 460.180281 
 127.187889 35.735222 454.380569 
 127.188111 35.735222 437.048752 
 127.188222 35.735222 423.965121 
 127.188333 35.735222 419.190397 
 127.188444 35.735222 417.356413 
 127.187444 35.735222 503.719452 
 127.187556 35.735222 482.939799 
 127.187667 35.735222 460.180281 
 127.187778 35.735222 453.983778 
 127.188000 35.735222 446.490628 
 127.188222 35.735222 423.965121 
 127.188333 35.735222 419.190397 
 127.188444 35.735222 417.356413 
 127.188556 35.735222 402.405260 
 127.187444 35.735333 499.550212 
 127.187556 35.735333 474.876139 
 127.187667 35.735333 455.852879 
 127.187778 35.735333 448.631152 
 127.188000 35.735333 426.080644 
 127.188222 35.735333 412.537579 
 127.188333 35.735333 411.825604 
 127.188444 35.735333 407.970230 
 127.188556 35.735333 391.359569 
 127.187444 35.735444 493.563375 
 127.187556 35.735444 467.062555 
 127.187667 35.735444 451.445921 
 127.187778 35.735444 442.617271 
 127.188000 35.735444 416.802954 
 127.188222 35.735444 407.352758 
 127.188333 35.735444 405.904286 
 127.188444 35.735444 397.903490 
 127.188556 35.735444 385.733724 
 127.187556 35.735444 467.062555 
 127.187667 35.735444 451.445921 
 127.187778 35.735444 442.617271 
 127.187889 35.735444 430.721135 
 127.188111 35.735444 412.357196 
 127.188333 35.735444 405.904286 
 127.188444 35.735444 397.903490 
 127.188556 35.735444 385.733724 
 127.188667 35.735444 383.997216 
 127.187556 35.735556 459.928314 
 127.187667 35.735556 446.148982 
 127.187778 35.735556 436.512341 
 127.187889 35.735556 426.190699 
 127.188111 35.735556 410.696861 
 127.188333 35.735556 402.721655 
 127.188444 35.735556 391.975859 
 127.188556 35.735556 384.386890 
 127.188667 35.735556 385.656608 
 127.187556 35.735667 453.379230 
 127.187667 35.735667 440.290338 
 127.187778 35.735667 431.864081 
 127.187889 35.735667 424.487295 
 127.188111 35.735667 410.919541 
 127.188333 35.735667 401.826642 
 127.188444 35.735667 390.720729 
 127.188556 35.735667 385.641144 
 127.188667 35.735667 389.066735 
 127.187667 35.735667 440.290338 
 127.187778 35.735667 431.864081 
 127.187889 35.735667 424.487295 
 127.188000 35.735667 414.649096 
 127.188222 35.735667 406.422382 
 127.188444 35.735667 390.720729 
 127.188556 35.735667 385.641144 
 127.188667 35.735667 389.066735 
 127.188778 35.735667 399.494185 
 127.187667 35.735778 435.100294 
 127.187778 35.735778 429.316172 
 127.187889 35.735778 425.166068 
 127.188000 35.735778 416.301367 
 127.188222 35.735778 407.889016 
 127.188444 35.735778 393.851871 
 127.188556 35.735778 389.657390 
 127.188667 35.735778 394.342754 
 127.188778 35.735778 402.448289 
 127.187667 35.735889 431.547523 
 127.187778 35.735889 429.092755 
 127.187889 35.735889 429.206023 
 127.188000 35.735889 421.224155 
 127.188222 35.735889 411.258239 
 127.188444 35.735889 401.805877 
 127.188556 35.735889 397.195199 
 127.188667 35.735889 400.306842 
 127.188778 35.735889 404.098082 
 127.187778 35.735889 429.092755 
 127.187889 35.735889 429.206023 
 127.188000 35.735889 421.224155 
 127.188111 35.735889 414.588272 
 127.188333 35.735889 408.329482 
 127.188556 35.735889 397.195199 
 127.188667 35.735889 400.306842 
 127.188778 35.735889 404.098082 
 127.188889 35.735889 403.798858 
 127.187778 35.736000 431.868721 
 127.187889 35.736000 436.242438 
 127.188000 35.736000 430.245375 
 127.188111 35.736000 421.904716 
 127.188333 35.736000 415.755133 
 127.188556 35.736000 406.496684 
 127.188667 35.736000 405.094991 
 127.188778 35.736000 404.737710 
 127.188889 35.736000 402.332059 
 127.187778 35.736111 437.325385 
 127.187889 35.736111 442.296523 
 127.188000 35.736111 439.027261 
 127.188111 35.736111 433.587532 
 127.188333 35.736111 420.963759 
 127.188556 35.736111 413.465236 
 127.188667 35.736111 408.096492 
 127.188778 35.736111 404.603350 
 127.188889 35.736111 399.483056 
 127.187778 35.736222 442.462015 
 127.187889 35.736222 445.424564 
 127.188000 35.736222 443.902336 
 127.188111 35.736222 441.713784 
 127.188333 35.736222 423.491468 
 127.188556 35.736222 417.085934 
 127.188667 35.736222 409.932015 
 127.188778 35.736222 403.685325 
 127.188889 35.736222 395.191990 
 127.187889 35.736222 445.424564 
 127.188000 35.736222 443.902336 
 127.188111 35.736222 441.713784 
 127.188222 35.736222 436.686773 
 127.188444 35.736222 420.383214 
 127.188667 35.736222 409.932015 
 127.188778 35.736222 403.685325 
 127.188889 35.736222 395.191990 
 127.189000 35.736222 385.196782 
 127.187889 35.736333 446.690902 
 127.188000 35.736333 445.826851 
 127.188111 35.736333 444.765374 
 127.188222 35.736333 439.860593 
 127.188444 35.736333 421.514260 
 127.188667 35.736333 411.308933 
 127.188778 35.736333 401.876612 
 127.188889 35.736333 390.519131 
 127.189000 35.736333 382.601291 
 127.187889 35.736444 447.129040 
 127.188000 35.736444 446.408277 
 127.188111 35.736444 445.755097 
 127.188222 35.736444 441.464597 
 127.188444 35.736444 422.797666 
 127.188667 35.736444 412.773051 
 127.188778 35.736444 399.634114 
 127.188889 35.736444 387.482887 
 127.189000 35.736444 382.220914 
 127.188000 35.736444 446.408277 
 127.188111 35.736444 445.755097 
 127.188222 35.736444 441.464597 
 127.188333 35.736444 427.007437 
 127.188556 35.736444 420.352186 
 127.188778 35.736444 399.634114 
 127.188889 35.736444 387.482887 
 127.189000 35.736444 382.220914 
 127.189111 35.736444 382.136425 
 127.188000 35.736556 446.541612 
 127.188111 35.736556 446.562293 
 127.188222 35.736556 443.430219 
 127.188333 35.736556 430.148141 
 127.188556 35.736556 422.704143 
 127.188778 35.736556 399.140728 
 127.188889 35.736556 388.050538 
 127.189000 35.736556 384.498838 
 127.189111 35.736556 386.820040 
 127.188000 35.736667 446.730154 
 127.188111 35.736667 448.336242 
 127.188222 35.736667 446.424067 
 127.188333 35.736667 433.842746 
 127.188556 35.736667 427.508894 
 127.188778 35.736667 404.541614 
 127.188889 35.736667 394.102501 
 127.189000 35.736667 390.750114 
 127.189111 35.736667 395.166793 
 127.188111 35.736667 448.336242 
 127.188222 35.736667 446.424067 
 127.188333 35.736667 433.842746 
 127.188444 35.736667 429.700167 
 127.188667 35.736667 421.517680 
 127.188889 35.736667 394.102501 
 127.189000 35.736667 390.750114 
 127.189111 35.736667 395.166793 
 127.189222 35.736667 404.800014 
 127.188111 35.736778 450.762866 
 127.188222 35.736778 448.631996 
 127.188333 35.736778 436.453485 
 127.188444 35.736778 433.847389 
 127.188667 35.736778 431.999561 
 127.188889 35.736778 406.631742 
 127.189000 35.736778 402.031665 
 127.189111 35.736778 404.676057 
 127.189222 35.736778 409.069922 
 127.188111 35.736889 452.342120 
 127.188222 35.736889 449.302117 
 127.188333 35.736889 437.772501 
 127.188444 35.736889 437.141570 
 127.188667 35.736889 441.289560 
 127.188889 35.736889 422.146321 
 127.189000 35.736889 415.729259 
 127.189111 35.736889 411.675596 
 127.189222 35.736889 411.431757 
 127.188222 35.736889 449.302117 
 127.188333 35.736889 437.772501 
 127.188444 35.736889 437.141570 
 127.188556 35.736889 440.777301 
 127.188778 35.736889 431.365460 
 127.189000 35.736889 415.729259 
 127.189111 35.736889 411.675596 
 127.189222 35.736889 411.431757 
 127.189333 35.736889 419.037022 
 127.188222 35.737000 448.768545 
 127.188333 35.737000 438.526812 
 127.188444 35.737000 440.055383 
 127.188556 35.737000 444.816853 
 127.188778 35.737000 440.781928 
 127.189000 35.737000 426.688595 
 127.189111 35.737000 415.949106 
 127.189222 35.737000 413.463932 
 127.189333 35.737000 422.316552 
 127.188222 35.737111 447.159993 
 127.188333 35.737111 439.627426 
 127.188444 35.737111 442.959997 
 127.188556 35.737111 447.812188 
 127.188778 35.737111 447.051647 
 127.189000 35.737111 433.411623 
 127.189111 35.737111 419.377748 
 127.189222 35.737111 416.377289 
 127.189333 35.737111 425.028012 
 127.188333 35.737111 439.627426 
 127.188444 35.737111 442.959997 
 127.188556 35.737111 447.812188 
 127.188667 35.737111 451.889850 
 127.188889 35.737111 440.697953 
 127.189111 35.737111 419.377748 
 127.189222 35.737111 416.377289 
 127.189333 35.737111 425.028012 
 127.189444 35.737111 428.398113 
 127.188333 35.737222 441.715521 
 127.188444 35.737222 445.755936 
 127.188556 35.737222 451.285842 
 127.188667 35.737222 458.691197 
 127.188889 35.737222 444.337483 
 127.189111 35.737222 424.037194 
 127.189222 35.737222 421.879777 
 127.189333 35.737222 427.852308 
 127.189444 35.737222 429.242559 
 127.188333 35.737333 444.425071 
 127.188444 35.737333 448.518433 
 127.188556 35.737333 456.564464 
 127.188667 35.737333 467.575280 
 127.188889 35.737333 447.629304 
 127.189111 35.737333 432.000620 
 127.189222 35.737333 432.289454 
 127.189333 35.737333 432.344423 
 127.189444 35.737333 430.637844 
 127.188444 35.737333 448.518433 
 127.188556 35.737333 456.564464 
 127.188667 35.737333 467.575280 
 127.188778 35.737333 462.085832 
 127.189000 35.737333 440.803401 
 127.189222 35.737333 432.289454 
 127.189333 35.737333 432.344423 
 127.189444 35.737333 430.637844 
 127.189556 35.737333 430.153761 
 127.188444 35.737444 451.904794 
 127.188556 35.737444 464.041711 
 127.188667 35.737444 476.250249 
 127.188778 35.737444 470.733830 
 127.189000 35.737444 444.212148 
 127.189222 35.737444 445.206711 
 127.189333 35.737444 439.650465 
 127.189444 35.737444 432.420930 
 127.189556 35.737444 429.637085 
 127.188444 35.737556 456.806862 
 127.188556 35.737556 472.452136 
 127.188667 35.737556 482.389448 
 127.188778 35.737556 476.343542 
 127.189000 35.737556 448.072618 
 127.189222 35.737556 453.264560 
 127.189333 35.737556 446.653128 
 127.189444 35.737556 433.433889 
 127.189556 35.737556 428.178390 
 127.188556 35.737556 472.452136 
 127.188667 35.737556 482.389448 
 127.188778 35.737556 476.343542 
 127.188889 35.737556 456.646971 
 127.189111 35.737556 451.130216 
 127.189333 35.737556 446.653128 
 127.189444 35.737556 433.433889 
 127.189556 35.737556 428.178390 
 127.189667 35.737556 419.154985 
 127.188556 35.737667 479.600808 
 127.188667 35.737667 485.334546 
 127.188778 35.737667 477.065158 
 127.188889 35.737667 458.597620 
 127.189111 35.737667 454.835661 
 127.189333 35.737667 449.717580 
 127.189444 35.737667 433.088726 
 127.189556 35.737667 425.225213 
 127.189667 35.737667 411.981121 
 127.188556 35.737778 484.229326 
 127.188667 35.737778 485.294348 
 127.188778 35.737778 473.177205 
 127.188889 35.737778 457.195148 
 127.189111 35.737778 455.581846 
 127.189333 35.737778 449.477344 
 127.189444 35.737778 431.150304 
 127.189556 35.737778 419.912530 
 127.189667 35.737778 403.760256 
 127.188667 35.737778 485.294348 
 127.188778 35.737778 473.177205 
 127.188889 35.737778 457.195148 
 127.189000 35.737778 452.398899 
 127.189222 35.737778 456.155796 
 127.189444 35.737778 431.150304 
 127.189556 35.737778 419.912530 
 127.189667 35.737778 403.760256 
 127.189778 35.737778 391.546322 
 127.188667 35.737889 482.236743 
 127.188778 35.737889 466.688917 
 127.188889 35.737889 454.903492 
 127.189000 35.737889 451.952541 
 127.189222 35.737889 454.208285 
 127.189444 35.737889 426.520771 
 127.189556 35.737889 411.973550 
 127.189667 35.737889 396.791391 
 127.189778 35.737889 389.674905 
 127.188667 35.738000 476.117618 
 127.188778 35.738000 460.438327 
 127.188889 35.738000 453.061690 
 127.189000 35.738000 450.469593 
 127.189222 35.738000 447.715822 
 127.189444 35.738000 418.709441 
 127.189556 35.738000 403.624366 
 127.189667 35.738000 392.756519 
 127.189778 35.738000 389.245511 
 127.188778 35.738111 456.051190 
 127.188889 35.738111 451.509895 
 127.189000 35.738111 448.059998 
 127.189111 35.738111 444.487316 
 127.189333 35.738111 421.980067 
 127.189556 35.738111 398.826927 
 127.189667 35.738111 392.060075 
 127.189778 35.738111 390.301876 
 127.189889 35.738111 385.727199 
 127.188778 35.738222 453.426100 
 127.188889 35.738222 449.723061 
 127.189000 35.738222 445.250722 
 127.189111 35.738222 440.707308 
 127.189333 35.738222 415.513496 
 127.189556 35.738222 399.610202 
 127.189667 35.738222 395.301226 
 127.189778 35.738222 393.480290 
 127.189889 35.738222 386.304942 
 127.188778 35.738333 451.701880 
 127.188889 35.738333 447.451841 
 127.189000 35.738333 443.019091 
 127.189111 35.738333 440.116925 
 127.189333 35.738333 415.306046 
 127.189556 35.738333 405.159779 
 127.189667 35.738333 403.901709 
 127.189778 35.738333 399.558906 
 127.189889 35.738333 388.386690 
 127.188889 35.738333 447.451841 
 127.189000 35.738333 443.019091 
 127.189111 35.738333 440.116925 
 127.189222 35.738333 427.266990 
 127.189444 35.738333 411.033114 
 127.189667 35.738333 403.901709 
 127.189778 35.738333 399.558906 
 127.189889 35.738333 388.386690 
 127.190000 35.738333 385.048183 
 127.188889 35.738444 445.070243 
 127.189000 35.738444 441.937147 
 127.189111 35.738444 442.352170 
 127.189222 35.738444 434.900824 
 127.189444 35.738444 413.212301 
 127.189667 35.738444 417.069579 
 127.189778 35.738444 408.596070 
 127.189889 35.738444 392.664883 
 127.190000 35.738444 388.925270 
 127.188889 35.738556 443.203304 
 127.189000 35.738556 442.193802 
 127.189111 35.738556 448.160260 
 127.189222 35.738556 448.211544 
 127.189444 35.738556 417.139967 
 127.189667 35.738556 429.321938 
 127.189778 35.738556 419.400768 
 127.189889 35.738556 400.159211 
 127.190000 35.738556 395.481959 
 127.189000 35.738556 442.193802 
 127.189111 35.738556 448.160260 
 127.189222 35.738556 448.211544 
 127.189333 35.738556 428.307004 
 127.189556 35.738556 421.940244 
 127.189778 35.738556 419.400768 
 127.189889 35.738556 400.159211 
 127.190000 35.738556 395.481959 
 127.190111 35.738556 403.512034 
 127.189000 35.738667 444.344273 
 127.189111 35.738667 458.279556 
 127.189222 35.738667 463.460463 
 127.189333 35.738667 442.326532 
 127.189556 35.738667 430.314920 
 127.189778 35.738667 429.383609 
 127.189889 35.738667 410.937572 
 127.190000 35.738667 403.045041 
 127.190111 35.738667 405.568971 
 127.189000 35.738778 449.658750 
 127.189111 35.738778 470.527211 
 127.189222 35.738778 475.623491 
 127.189333 35.738778 458.253756 
 127.189556 35.738778 439.426541 
 127.189778 35.738778 436.222520 
 127.189889 35.738778 422.030107 
 127.190000 35.738778 408.306774 
 127.190111 35.738778 406.424488 
 127.189111 35.738778 470.527211 
 127.189222 35.738778 475.623491 
 127.189333 35.738778 458.253756 
 127.189444 35.738778 439.858305 
 127.189667 35.738778 440.396798 
 127.189889 35.738778 422.030107 
 127.190000 35.738778 408.306774 
 127.190111 35.738778 406.424488 
 127.190222 35.738778 406.181306 
 127.189111 35.738889 480.545857 
 127.189222 35.738889 482.990357 
 127.189333 35.738889 470.991418 
 127.189444 35.738889 458.045357 
 127.189667 35.738889 442.442459 
 127.189889 35.738889 429.551215 
 127.190000 35.738889 411.191452 
 127.190111 35.738889 407.210441 
 127.190222 35.738889 406.441340 
 127.189111 35.739000 486.431756 
 127.189222 35.739000 486.572202 
 127.189333 35.739000 477.787543 
 127.189444 35.739000 469.953269 
 127.189667 35.739000 444.233014 
 127.189889 35.739000 433.404441 
 127.190000 35.739000 414.464754 
 127.190111 35.739000 409.198270 
 127.190222 35.739000 407.178093 
 127.189222 35.739000 486.572202 
 127.189333 35.739000 477.787543 
 127.189444 35.739000 469.953269 
 127.189556 35.739000 460.038871 
 127.189778 35.739000 440.655203 
 127.190000 35.739000 414.464754 
 127.190111 35.739000 409.198270 
 127.190222 35.739000 407.178093 
 127.190333 35.739000 405.515710 
 127.189222 35.739111 487.663873 
 127.189333 35.739111 479.595818 
 127.189444 35.739111 474.547070 
 127.189556 35.739111 466.708327 
 127.189778 35.739111 440.555625 
 127.190000 35.739111 420.580798 
 127.190111 35.739111 413.955446 
 127.190222 35.739111 408.586281 
 127.190333 35.739111 405.609981 
 127.189222 35.739222 486.939584 
 127.189333 35.739222 479.012695 
 127.189444 35.739222 475.913542 
 127.189556 35.739222 470.217357 
 127.189778 35.739222 440.529068 
 127.190000 35.739222 427.672261 
 127.190111 35.739222 420.596301 
 127.190222 35.739222 410.324472 
 127.190333 35.739222 405.847450 
 127.189333 35.739222 479.012695 
 127.189444 35.739222 475.913542 
 127.189556 35.739222 470.217357 
 127.189667 35.739222 449.236513 
 127.189889 35.739222 437.073534 
 127.190111 35.739222 420.596301 
 127.190222 35.739222 410.324472 
 127.190333 35.739222 405.847450 
 127.190444 35.739222 406.399918 
 127.189333 35.739333 478.025379 
 127.189444 35.739333 476.373618 
 127.189556 35.739333 472.325900 
 127.189667 35.739333 453.720502 
 127.189889 35.739333 437.875413 
 127.190111 35.739333 425.558631 
 127.190222 35.739333 412.018933 
 127.190333 35.739333 406.316350 
 127.190444 35.739333 407.447352 
 127.189333 35.739445 477.357024 
 127.189444 35.739445 476.760503 
 127.189556 35.739445 474.274460 
 127.189667 35.739445 459.535470 
 127.189889 35.739445 438.867034 
 127.190111 35.739445 428.170268 
 127.190222 35.739445 413.750564 
 127.190333 35.739445 407.348346 
 127.190444 35.739445 408.974650 
 127.189444 35.739445 476.760503 
 127.189556 35.739445 474.274460 
 127.189667 35.739445 459.535470 
 127.189778 35.739445 443.610801 
 127.190000 35.739445 433.744620 
 127.190222 35.739445 413.750564 
 127.190333 35.739445 407.348346 
 127.190444 35.739445 408.974650 
 127.190556 35.739445 411.159119 
 127.189444 35.739556 477.370622 
 127.189556 35.739556 476.073303 
 127.189667 35.739556 465.271580 
 127.189778 35.739556 447.987278 
 127.190000 35.739556 435.248384 
 127.190222 35.739556 416.277484 
 127.190333 35.739556 409.935699 
 127.190444 35.739556 411.050528 
 127.190556 35.739556 412.076523 
 127.189444 35.739667 478.132180 
 127.189556 35.739667 477.381513 
 127.189667 35.739667 470.000620 
 127.189778 35.739667 455.742539 
 127.190000 35.739667 439.342433 
 127.190222 35.739667 422.247154 
 127.190333 35.739667 416.423390 
 127.190444 35.739667 414.087725 
 127.190556 35.739667 413.430903 
 127.189556 35.739667 477.381513 
 127.189667 35.739667 470.000620 
 127.189778 35.739667 455.742539 
 127.189889 35.739667 449.582760 
 127.190111 35.739667 432.848520 
 127.190333 35.739667 416.423390 
 127.190444 35.739667 414.087725 
 127.190556 35.739667 413.430903 
 127.190667 35.739667 417.270525 
 127.189556 35.739778 478.223125 
 127.189667 35.739778 473.747672 
 127.189778 35.739778 466.521519 
 127.189889 35.739778 463.302803 
 127.190111 35.739778 442.046394 
 127.190333 35.739778 429.266281 
 127.190444 35.739778 419.131139 
 127.190556 35.739778 415.837596 
 127.190667 35.739778 420.663052 
 127.189556 35.739889 478.828475 
 127.189667 35.739889 476.987417 
 127.189778 35.739889 475.770110 
 127.189889 35.739889 474.256758 
 127.190111 35.739889 457.499917 
 127.190333 35.739889 445.498198 
 127.190444 35.739889 427.560603 
 127.190556 35.739889 420.093326 
 127.190667 35.739889 424.681781 
 127.189667 35.739889 476.987417 
 127.189778 35.739889 475.770110 
 127.189889 35.739889 474.256758 
 127.190000 35.739889 464.146787 
 127.190222 35.739889 455.341227 
 127.190444 35.739889 427.560603 
 127.190556 35.739889 420.093326 
 127.190667 35.739889 424.681781 
 127.190778 35.739889 430.418657 
 127.189667 35.740000 479.763745 
 127.189778 35.740000 480.353488 
 127.189889 35.740000 478.291156 
 127.190000 35.740000 469.423483 
 127.190222 35.740000 465.264195 
 127.190444 35.740000 439.098034 
 127.190556 35.740000 426.355524 
 127.190667 35.740000 428.272615 
 127.190778 35.740000 431.644366 
 127.189667 35.740111 481.581937 
 127.189778 35.740111 481.935575 
 127.189889 35.740111 479.068746 
 127.190000 35.740111 470.703968 
 127.190222 35.740111 468.978940 
 127.190444 35.740111 450.232239 
 127.190556 35.740111 432.988711 
 127.190667 35.740111 430.759768 
 127.190778 35.740111 432.857789 
 127.189778 35.740111 481.935575 
 127.189889 35.740111 479.068746 
 127.190000 35.740111 470.703968 
 127.190111 35.740111 468.900429 
 127.190333 35.740111 464.482303 
 127.190556 35.740111 432.988711 
 127.190667 35.740111 430.759768 
 127.190778 35.740111 432.857789 
 127.190889 35.740111 437.156732 
 127.189778 35.740222 482.430771 
 127.189889 35.740222 479.364892 
 127.190000 35.740222 472.445755 
 127.190111 35.740222 472.315554 
 127.190333 35.740222 467.790375 
 127.190556 35.740222 437.741896 
 127.190667 35.740222 432.360449 
 127.190778 35.740222 434.489493 
 127.190889 35.740222 440.689920 
 127.189778 35.740333 482.745778 
 127.189889 35.740333 480.836622 
 127.190000 35.740333 477.365554 
 127.190111 35.740333 479.182105 
 127.190333 35.740333 470.452975 
 127.190556 35.740333 440.506022 
 127.190667 35.740333 433.760490 
 127.190778 35.740333 437.006597 
 127.190889 35.740333 445.298375 
 127.189889 35.740333 480.836622 
 127.190000 35.740333 477.365554 
 127.190111 35.740333 479.182105 
 127.190222 35.740333 476.352950 
 127.190444 35.740333 461.932084 
 127.190667 35.740333 433.760490 
 127.190778 35.740333 437.006597 
 127.190889 35.740333 445.298375 
 127.191000 35.740333 455.206138 
 127.189889 35.740445 485.495717 
 127.190000 35.740445 487.421786 
 127.190111 35.740445 489.943576 
 127.190222 35.740445 483.895277 
 127.190444 35.740445 466.446112 
 127.190667 35.740445 435.707270 
 127.190778 35.740445 440.778362 
 127.190889 35.740445 450.359526 
 127.191000 35.740445 458.290877 
 127.189889 35.740556 494.288756 
 127.190000 35.740556 498.882699 
 127.190111 35.740556 499.913084 
 127.190222 35.740556 493.383389 
 127.190444 35.740556 475.646012 
 127.190667 35.740556 439.046986 
 127.190778 35.740556 445.759803 
 127.190889 35.740556 454.903400 
 127.191000 35.740556 460.258981 
 127.190000 35.740556 498.882699 
 127.190111 35.740556 499.913084 
 127.190222 35.740556 493.383389 
 127.190333 35.740556 484.166044 
 127.190556 35.740556 448.524887 
 127.190778 35.740556 445.759803 
 127.190889 35.740556 454.903400 
 127.191000 35.740556 460.258981 
 127.191111 35.740556 461.762147 
 127.190000 35.740667 505.478886 
 127.190111 35.740667 505.494544 
 127.190222 35.740667 502.023599 
 127.190333 35.740667 497.418000 
 127.190556 35.740667 461.249493 
 127.190778 35.740667 451.261838 
 127.190889 35.740667 458.280097 
 127.191000 35.740667 461.342665 
 127.191111 35.740667 461.661709 
 127.190000 35.740778 507.809004 
 127.190111 35.740778 508.006751 
 127.190222 35.740778 508.157963 
 127.190333 35.740778 508.577691 
 127.190556 35.740778 481.449395 
 127.190778 35.740778 456.321894 
 127.190889 35.740778 460.439722 
 127.191000 35.740778 461.809780 
 127.191111 35.740778 461.242390 
 127.190000 35.740889 508.553281 
 127.190111 35.740889 509.413758 
 127.190222 35.740889 512.086581 
 127.190333 35.740889 514.343571 
 127.190556 35.740889 499.389594 
 127.190778 35.740889 460.788354 
 127.190889 35.740889 461.793247 
 127.191000 35.740889 461.885101 
 127.191111 35.740889 460.634646 
 127.190111 35.740889 509.413758 
 127.190222 35.740889 512.086581 
 127.190333 35.740889 514.343571 
 127.190444 35.740889 513.347593 
 127.190667 35.740889 467.791065 
 127.190889 35.740889 461.793247 
 127.191000 35.740889 461.885101 
 127.191111 35.740889 460.634646 
 127.191222 35.740889 459.206495 
 127.190111 35.741000 510.669901 
 127.190222 35.741000 514.547175 
 127.190333 35.741000 516.527666 
 127.190444 35.741000 515.740594 
 127.190667 35.741000 483.659709 
 127.190889 35.741000 463.007943 
 127.191000 35.741000 461.782669 
 127.191111 35.741000 460.015730 
 127.191222 35.741000 458.813171 
 127.190111 35.741111 512.127815 
 127.190222 35.741111 516.052550 
 127.190333 35.741111 517.143218 
 127.190444 35.741111 516.025754 
 127.190667 35.741111 497.506021 
 127.190889 35.741111 465.290124 
 127.191000 35.741111 461.844005 
 127.191111 35.741111 459.557990 
 127.191222 35.741111 458.605495 
 127.190222 35.741111 516.052550 
 127.190333 35.741111 517.143218 
 127.190444 35.741111 516.025754 
 127.190556 35.741111 511.984013 
 127.190778 35.741111 474.159500 
 127.191000 35.741111 461.844005 
 127.191111 35.741111 459.557990 
 127.191222 35.741111 458.605495 
 127.191333 35.741111 458.294866 
 127.190222 35.741222 516.880060 
 127.190333 35.741222 517.070101 
 127.190444 35.741222 515.517956 
 127.190556 35.741222 513.013687 
 127.190778 35.741222 487.307176 
 127.191000 35.741222 462.748066 
 127.191111 35.741222 459.437864 
 127.191222 35.741222 458.621887 
 127.191333 35.741222 458.370756 
 127.190222 35.741333 517.205283 
 127.190333 35.741333 516.602233 
 127.190444 35.741333 514.788376 
 127.190556 35.741333 513.385394 
 127.190778 35.741333 502.033179 
 127.191000 35.741333 465.751811 
 127.191111 35.741333 459.992988 
 127.191222 35.741333 459.100847 
 127.191333 35.741333 458.760247 
 127.190333 35.741333 516.602233 
 127.190444 35.741333 514.788376 
 127.190556 35.741333 513.385394 
 127.190667 35.741333 511.593250 
 127.190889 35.741333 482.796213 
 127.191111 35.741333 459.992988 
 127.191222 35.741333 459.100847 
 127.191333 35.741333 458.760247 
 127.191444 35.741333 458.144128 
 127.190333 35.741445 515.866075 
 127.190444 35.741445 514.151334 
 127.190556 35.741445 513.713292 
 127.190667 35.741445 514.588813 
 127.190889 35.741445 498.687787 
 127.191111 35.741445 462.170586 
 127.191222 35.741445 460.846293 
 127.191333 35.741445 459.875515 
 127.191444 35.741445 458.488202 
 127.190333 35.741556 515.025703 
 127.190444 35.741556 513.774334 
 127.190556 35.741556 514.224763 
 127.190667 35.741556 516.734649 
 127.190889 35.741556 511.435728 
 127.191111 35.741556 468.248578 
 127.191222 35.741556 465.760477 
 127.191333 35.741556 462.307580 
 127.191444 35.741556 459.188837 
 127.190444 35.741556 513.774334 
 127.190556 35.741556 514.224763 
 127.190667 35.741556 516.734649 
 127.190778 35.741556 518.511746 
 127.191000 35.741556 484.716856 
 127.191222 35.741556 465.760477 
 127.191333 35.741556 462.307580 
 127.191444 35.741556 459.188837 
 127.191556 35.741556 459.547315 
 127.190444 35.741667 513.712683 
 127.190556 35.741667 515.038868 
 127.190667 35.741667 518.558991 
 127.190778 35.741667 521.196263 
 127.191000 35.741667 499.129053 
 127.191222 35.741667 476.090703 
 127.191333 35.741667 466.594310 
 127.191444 35.741667 460.469607 
 127.191556 35.741667 461.350186 
 127.190444 35.741778 513.991688 
 127.190556 35.741778 516.218181 
 127.190667 35.741778 520.143038 
 127.190778 35.741778 522.344630 
 127.191000 35.741778 510.118181 
 127.191222 35.741778 490.052733 
 127.191333 35.741778 472.966005 
 127.191444 35.741778 462.716673 
 127.191556 35.741778 464.612418 
 127.190556 35.741778 516.218181 
 127.190667 35.741778 520.143038 
 127.190778 35.741778 522.344630 
 127.190889 35.741778 520.815393 
 127.191111 35.741778 497.635692 
 127.191333 35.741778 472.966005 
 127.191444 35.741778 462.716673 
 127.191556 35.741778 464.612418 
 127.191667 35.741778 477.129496 
 127.190556 35.741889 517.735350 
 127.190667 35.741889 521.390490 
 127.190778 35.741889 522.589983 
 127.190889 35.741889 520.835331 
 127.191111 35.741889 509.188400 
 127.191333 35.741889 481.227942 
 127.191444 35.741889 466.522199 
 127.191556 35.741889 470.018280 
 127.191667 35.741889 484.856676 
 127.190556 35.742000 519.397780 
 127.190667 35.742000 522.167497 
 127.190778 35.742000 521.994215 
 127.190889 35.742000 519.004125 
 127.191111 35.742000 513.945166 
 127.191333 35.742000 490.431535 
 127.191444 35.742000 472.469167 
 127.191556 35.742000 477.573280 
 127.191667 35.742000 491.377764 
 127.190667 35.742000 522.167497 
 127.190778 35.742000 521.994215 
 127.190889 35.742000 519.004125 
 127.191000 35.742000 515.277620 
 127.191222 35.742000 509.224034 
 127.191444 35.742000 472.469167 
 127.191556 35.742000 477.573280 
 127.191667 35.742000 491.377764 
 127.191778 35.742000 498.127004 
 127.190667 35.742111 522.359527 
 127.190778 35.742111 520.394118 
 127.190889 35.742111 516.033777 
 127.191000 35.742111 513.716317 
 127.191222 35.742111 512.904535 
 127.191444 35.742111 480.483246 
 127.191556 35.742111 485.780422 
 127.191667 35.742111 495.696594 
 127.191778 35.742111 499.057986 
 127.190667 35.742222 521.849513 
 127.190778 35.742222 517.835758 
 127.190889 35.742222 513.043726 
 127.191000 35.742222 511.867714 
 127.191222 35.742222 514.030624 
 127.191444 35.742222 489.139826 
 127.191556 35.742222 492.471608 
 127.191667 35.742222 498.061264 
 127.191778 35.742222 499.278872 
 127.190778 35.742222 517.835758 
 127.190889 35.742222 513.043726 
 127.191000 35.742222 511.867714 
 127.191111 35.742222 514.258081 
 127.191333 35.742222 505.362015 
 127.191556 35.742222 492.471608 
 127.191667 35.742222 498.061264 
 127.191778 35.742222 499.278872 
 127.191889 35.742222 497.690457 
 127.190778 35.742333 514.926341 
 127.190889 35.742333 510.822716 
 127.191000 35.742333 510.195374 
 127.191111 35.742333 511.969918 
 127.191333 35.742333 508.205630 
 127.191556 35.742333 496.603809 
 127.191667 35.742333 499.119046 
 127.191778 35.742333 498.988961 
 127.191889 35.742333 496.606196 
 127.190778 35.742444 512.416838 
 127.190889 35.742444 509.388555 
 127.191000 35.742444 508.479967 
 127.191111 35.742444 507.493816 
 127.191333 35.742444 506.077607 
 127.191556 35.742444 498.481717 
 127.191667 35.742444 499.326833 
 127.191778 35.742444 498.276558 
 127.191889 35.742444 495.638398 
 127.190889 35.742444 509.388555 
 127.191000 35.742444 508.479967 
 127.191111 35.742444 507.493816 
 127.191222 35.742444 506.951912 
 127.191444 35.742444 499.314123 
 127.191667 35.742444 499.326833 
 127.191778 35.742444 498.276558 
 127.191889 35.742444 495.638398 
 127.192000 35.742444 494.237828 
 127.190889 35.742555 508.415196 
 127.191000 35.742555 506.166748 
 127.191111 35.742555 500.729787 
 127.191222 35.742555 498.369516 
 127.191444 35.742555 497.721566 
 127.191667 35.742555 498.747398 
 127.191778 35.742555 497.242358 
 127.191889 35.742555 494.922045 
 127.192000 35.742555 493.934095 
 127.190889 35.742667 507.510681 
 127.191000 35.742667 502.587390 
 127.191111 35.742667 493.599992 
 127.191222 35.742667 490.607576 
 127.191444 35.742667 491.328169 
 127.191667 35.742667 497.237687 
 127.191778 35.742667 496.056856 
 127.191889 35.742667 494.415361 
 127.192000 35.742667 493.553993 
 127.191000 35.742667 502.587390 
 127.191111 35.742667 493.599992 
 127.191222 35.742667 490.607576 
 127.191333 35.742667 489.793124 
 127.191556 35.742667 496.353893 
 127.191778 35.742667 496.056856 
 127.191889 35.742667 494.415361 
 127.192000 35.742667 493.553993 
 127.192111 35.742667 491.867661 
 127.191000 35.742778 497.626843 
 127.191111 35.742778 488.446364 
 127.191222 35.742778 485.839761 
 127.191333 35.742778 483.249999 
 127.191556 35.742778 493.095499 
 127.191778 35.742778 494.905670 
 127.191889 35.742778 493.970397 
 127.192000 35.742778 492.872628 
 127.192111 35.742778 490.110034 
 127.191000 35.742889 492.343376 
 127.191111 35.742889 485.502875 
 127.191222 35.742889 483.033587 
 127.191333 35.742889 479.041278 
 127.191556 35.742889 490.425143 
 127.191778 35.742889 493.787621 
 127.191889 35.742889 493.268215 
 127.192000 35.742889 491.593773 
 127.192111 35.742889 488.175270 
 127.191111 35.742889 485.502875 
 127.191222 35.742889 483.033587 
 127.191333 35.742889 479.041278 
 127.191444 35.742889 480.109705 
 127.191667 35.742889 493.580241 
 127.191889 35.742889 493.268215 
 127.192000 35.742889 491.593773 
 127.192111 35.742889 488.175270 
 127.192222 35.742889 485.797660 
 127.191111 35.743000 483.835282 
 127.191222 35.743000 480.831210 
 127.191333 35.743000 476.177672 
 127.191444 35.743000 477.737147 
 127.191667 35.743000 492.336338 
 127.191889 35.743000 491.463867 
 127.192000 35.743000 489.490924 
 127.192111 35.743000 486.642317 
 127.192222 35.743000 485.098862 
 127.191111 35.743111 482.573877 
 127.191222 35.743111 478.583932 
 127.191333 35.743111 474.188006 
 127.191444 35.743111 476.006683 
 127.191667 35.743111 490.536567 
 127.191889 35.743111 486.675262 
 127.192000 35.743111 486.535964 
 127.192111 35.743111 485.590411 
 127.192222 35.743111 484.480246 
 127.191222 35.743111 478.583932 
 127.191333 35.743111 474.188006 
 127.191444 35.743111 476.006683 
 127.191556 35.743111 486.109041 
 127.191778 35.743111 489.245475 
 127.192000 35.743111 486.535964 
 127.192111 35.743111 485.590411 
 127.192222 35.743111 484.480246 
 127.192333 35.743111 481.730787 
 127.191222 35.743222 476.298858 
 127.191333 35.743222 472.790826 
 127.191444 35.743222 474.012009 
 127.191556 35.743222 481.767930 
 127.191778 35.743222 483.115527 
 127.192000 35.743222 482.585173 
 127.192111 35.743222 484.657777 
 127.192222 35.743222 483.624225 
 127.192333 35.743222 480.640014 
 127.191222 35.743333 474.304985 
 127.191333 35.743333 471.608865 
 127.191444 35.743333 470.678437 
 127.191556 35.743333 473.376070 
 127.191778 35.743333 474.062909 
 127.192000 35.743333 477.284270 
 127.192111 35.743333 483.176759 
 127.192222 35.743333 482.106684 
 127.192333 35.743333 479.538361 
 127.191333 35.743333 471.608865 
 127.191444 35.743333 470.678437 
 127.191556 35.743333 473.376070 
 127.191667 35.743333 477.775689 
 127.191889 35.743333 468.898211 
 127.192111 35.743333 483.176759 
 127.192222 35.743333 482.106684 
 127.192333 35.743333 479.538361 
 127.192444 35.743333 478.560061 
 127.191333 35.743444 470.018210 
 127.191444 35.743444 464.731979 
 127.191556 35.743444 461.386872 
 127.191667 35.743444 465.328838 
 127.191889 35.743444 463.386067 
 127.192111 35.743444 479.747865 
 127.192222 35.743444 479.107246 
 127.192333 35.743444 478.149737 
 127.192444 35.743444 477.640314 
 127.191333 35.743555 467.031203 
 127.191444 35.743555 456.478462 
 127.191556 35.743555 450.972194 
 127.191667 35.743555 454.582390 
 127.191889 35.743555 460.081430 
 127.192111 35.743555 471.819946 
 127.192222 35.743555 473.204376 
 127.192333 35.743555 475.779860 
 127.192444 35.743555 475.748984 
 127.191444 35.743555 456.478462 
 127.191556 35.743555 450.972194 
 127.191667 35.743555 454.582390 
 127.191778 35.743555 459.395171 
 127.192000 35.743555 464.234047 
 127.192222 35.743555 473.204376 
 127.192333 35.743555 475.779860 
 127.192444 35.743555 475.748984 
 127.192556 35.743555 469.158347 
 127.191444 35.743667 448.954906 
 127.191556 35.743667 445.150879 
 127.191667 35.743667 448.214656 
 127.191778 35.743667 454.737798 
 127.192000 35.743667 457.574553 
 127.192222 35.743667 463.352959 
 127.192333 35.743667 471.208614 
 127.192444 35.743667 472.085722 
 127.192556 35.743667 463.977056 
 127.191444 35.743778 444.402406 
 127.191556 35.743778 442.562700 
 127.191667 35.743778 444.418651 
 127.191778 35.743778 448.891121 
 127.192000 35.743778 449.530942 
 127.192222 35.743778 451.843004 
 127.192333 35.743778 463.400670 
 127.192444 35.743778 466.339849 
 127.192556 35.743778 459.764371 
 127.191556 35.743778 442.562700 
 127.191667 35.743778 444.418651 
 127.191778 35.743778 448.891121 
 127.191889 35.743778 450.301542 
 127.192111 35.743778 446.049981 
 127.192333 35.743778 463.400670 
 127.192444 35.743778 466.339849 
 127.192556 35.743778 459.764371 
 127.192667 35.743778 456.366925 
 127.191556 35.743889 441.297667 
 127.191667 35.743889 440.679966 
 127.191778 35.743889 439.858884 
 127.191889 35.743889 440.002821 
 127.192111 35.743889 438.689170 
 127.192333 35.743889 453.674945 
 127.192444 35.743889 459.892036 
 127.192556 35.743889 457.229726 
 127.192667 35.743889 455.872918 
 127.191556 35.744000 440.145976 
 127.191667 35.744000 435.033446 
 127.191778 35.744000 428.677556 
 127.191889 35.744000 428.015035 
 127.192111 35.744000 434.958432 
 127.192333 35.744000 445.616729 
 127.192444 35.744000 454.751658 
 127.192556 35.744000 455.891724 
 127.192667 35.744000 455.615047 
 127.191667 35.744000 435.033446 
 127.191778 35.744000 428.677556 
 127.191889 35.744000 428.015035 
 127.192000 35.744000 429.981788 
 127.192222 35.744000 438.417120 
 127.192444 35.744000 454.751658 
 127.192556 35.744000 455.891724 
 127.192667 35.744000 455.615047 
 127.192778 35.744000 455.407402 
 127.191667 35.744111 427.143880 
 127.191778 35.744111 419.549880 
 127.191889 35.744111 419.090897 
 127.192000 35.744111 423.045352 
 127.192222 35.744111 436.191750 
 127.192444 35.744111 451.244101 
 127.192556 35.744111 455.039156 
 127.192667 35.744111 455.409352 
 127.192778 35.744111 455.319535 
 127.191667 35.744222 419.463085 
 127.191778 35.744222 414.446189 
 127.191889 35.744222 414.447505 
 127.192000 35.744222 418.898128 
 127.192222 35.744222 434.806243 
 127.192444 35.744222 448.243679 
 127.192556 35.744222 454.045110 
 127.192667 35.744222 455.149636 
 127.192778 35.744222 455.265079 
 127.191778 35.744222 414.446189 
 127.191889 35.744222 414.447505 
 127.192000 35.744222 418.898128 
 127.192111 35.744222 430.077178 
 127.192333 35.744222 438.481731 
 127.192556 35.744222 454.045110 
 127.192667 35.744222 455.149636 
 127.192778 35.744222 455.265079 
 127.192889 35.744222 455.372057 
 127.191778 35.744333 412.238230 
 127.191889 35.744333 412.572508 
 127.192000 35.744333 416.538117 
 127.192111 35.744333 426.683607 
 127.192333 35.744333 437.042027 
 127.192556 35.744333 452.310422 
 127.192667 35.744333 454.784186 
 127.192778 35.744333 455.272157 
 127.192889 35.744333 455.589914 
 127.191778 35.744444 411.456210 
 127.191889 35.744444 412.072258 
 127.192000 35.744444 415.210926 
 127.192111 35.744444 422.846663 
 127.192333 35.744444 436.028341 
 127.192556 35.744444 449.467441 
 127.192667 35.744444 454.313790 
 127.192778 35.744444 455.383068 
 127.192889 35.744444 456.037891 
 127.191889 35.744444 412.072258 
 127.192000 35.744444 415.210926 
 127.192111 35.744444 422.846663 
 127.192222 35.744444 431.163850 
 127.192444 35.744444 441.167108 
 127.192667 35.744444 454.313790 
 127.192778 35.744444 455.383068 
 127.192889 35.744444 456.037891 
 127.193000 35.744444 457.481125 
 127.191889 35.744556 412.256441 
 127.192000 35.744556 414.562945 
 127.192111 35.744556 419.977414 
 127.192222 35.744556 429.297914 
 127.192444 35.744556 438.639356 
 127.192667 35.744556 453.777592 
 127.192778 35.744556 455.679591 
 127.192889 35.744556 456.876722 
 127.193000 35.744556 459.037290 
 127.191889 35.744667 412.711974 
 127.192000 35.744667 414.330532 
 127.192111 35.744667 418.579081 
 127.192222 35.744667 428.344182 
 127.192444 35.744667 437.455580 
 127.192667 35.744667 453.236575 
 127.192778 35.744667 456.306852 
 127.192889 35.744667 458.238257 
 127.193000 35.744667 460.821192 
 127.192000 35.744778 414.306052 
 127.192111 35.744778 418.222565 
 127.192222 35.744778 428.363993 
 127.192333 35.744778 435.378281 
 127.192556 35.744778 441.335463 
 127.192778 35.744778 457.442860 
 127.192889 35.744778 460.011420 
 127.193000 35.744778 462.373884 
 127.193111 35.744778 464.018265 
 127.192000 35.744889 414.393833 
 127.192111 35.744889 418.547317 
 127.192222 35.744889 429.263019 
 127.192333 35.744889 435.881384 
 127.192556 35.744889 440.732956 
 127.192778 35.744889 459.087290 
 127.192889 35.744889 461.732060 
 127.193000 35.744889 463.440061 
 127.193111 35.744889 464.678359 
 127.192000 35.745000 414.587822 
 127.192111 35.745000 419.542643 
 127.192222 35.745000 431.040490 
 127.192333 35.745000 436.741332 
 127.192556 35.745000 441.708728 
 127.192778 35.745000 460.833440 
 127.192889 35.745000 462.988046 
 127.193000 35.745000 464.104346 
 127.193111 35.745000 465.251492 
 127.192111 35.745000 419.542643 
 127.192222 35.745000 431.040490 
 127.192333 35.745000 436.741332 
 127.192444 35.745000 438.120852 
 127.192667 35.745000 453.907799 
 127.192889 35.745000 462.988046 
 127.193000 35.745000 464.104346 
 127.193111 35.745000 465.251492 
 127.193222 35.745000 466.617649 
 127.192111 35.745111 421.482492 
 127.192222 35.745111 433.460781 
 127.192333 35.745111 437.792131 
 127.192444 35.745111 439.381734 
 127.192667 35.745111 455.831692 
 127.192889 35.745111 463.745974 
 127.193000 35.745111 464.570809 
 127.193111 35.745111 465.805210 
 127.193222 35.745111 466.929860 
 127.192111 35.745222 424.686120 
 127.192222 35.745222 435.852103 
 127.192333 35.745222 438.795229 
 127.192444 35.745222 441.018107 
 127.192667 35.745222 457.740128 
 127.192889 35.745222 464.270226 
 127.193000 35.745222 465.042438 
 127.193111 35.745222 466.324187 
 127.193222 35.745222 466.973617 
 127.192222 35.745222 435.852103 
 127.192333 35.745222 438.795229 
 127.192444 35.745222 441.018107 
 127.192556 35.745222 448.140335 
 127.192778 35.745222 462.716573 
 127.193000 35.745222 465.042438 
 127.193111 35.745222 466.324187 
 127.193222 35.745222 466.973617 
 127.193333 35.745222 465.512243 
 127.192222 35.745333 437.629048 
 127.192333 35.745333 439.704033 
 127.192444 35.745333 443.015408 
 127.192556 35.745333 451.759690 
 127.192778 35.745333 463.130345 
 127.193000 35.745333 465.752211 
 127.193111 35.745333 466.758374 
 127.193222 35.745333 466.678620 
 127.193333 35.745333 463.982709 
 127.192222 35.745444 438.806219 
 127.192333 35.745444 440.715225 
 127.192444 35.745444 445.550218 
 127.192556 35.745444 454.757314 
 127.192778 35.745444 464.136380 
 127.193000 35.745444 467.159422 
 127.193111 35.745444 467.096493 
 127.193222 35.745444 465.914800 
 127.193333 35.745444 461.629516 
 127.192333 35.745444 440.715225 
 127.192444 35.745444 445.550218 
 127.192556 35.745444 454.757314 
 127.192667 35.745444 460.080855 
 127.192889 35.745444 467.064093 
 127.193111 35.745444 467.096493 
 127.193222 35.745444 465.914800 
 127.193333 35.745444 461.629516 
 127.193444 35.745444 453.890429 
 127.192333 35.745556 442.164226 
 127.192444 35.745556 448.722978 
 127.192556 35.745556 457.041699 
 127.192667 35.745556 461.123100 
 127.192889 35.745556 471.726553 
 127.193111 35.745556 467.430190 
 127.193222 35.745556 464.478635 
 127.193333 35.745556 458.472852 
 127.193444 35.745556 451.204072 
 127.192333 35.745667 444.465301 
 127.192444 35.745667 452.248982 
 127.192556 35.745667 458.727421 
 127.192667 35.745667 462.517153 
 127.192889 35.745667 478.739797 
 127.193111 35.745667 468.081016 
 127.193222 35.745667 462.202346 
 127.193333 35.745667 454.960789 
 127.193444 35.745667 449.213961 
 127.192444 35.745667 452.248982 
 127.192556 35.745667 458.727421 
 127.192667 35.745667 462.517153 
 127.192778 35.745667 470.058249 
 127.193000 35.745667 475.958269 
 127.193222 35.745667 462.202346 
 127.193333 35.745667 454.960789 
 127.193444 35.745667 449.213961 
 127.193556 35.745667 446.647274 
 127.192444 35.745778 455.480257 
 127.192556 35.745778 460.067791 
 127.192667 35.745778 464.571307 
 127.192778 35.745778 474.779409 
 127.193000 35.745778 483.353452 
 127.193222 35.745778 459.280074 
 127.193333 35.745778 451.832192 
 127.193444 35.745778 447.895126 
 127.193556 35.745778 445.789010 
 127.192444 35.745889 457.887330 
 127.192556 35.745889 461.391504 
 127.192667 35.745889 467.560608 
 127.192778 35.745889 479.879749 
 127.193000 35.745889 489.173236 
 127.193222 35.745889 456.703402 
 127.193333 35.745889 449.658422 
 127.193444 35.745889 447.042411 
 127.193556 35.745889 444.786412 
 127.192556 35.745889 461.391504 
 127.192667 35.745889 467.560608 
 127.192778 35.745889 479.879749 
 127.192889 35.745889 489.570592 
 127.193111 35.745889 473.346765 
 127.193333 35.745889 449.658422 
 127.193444 35.745889 447.042411 
 127.193556 35.745889 444.786412 
 127.193667 35.745889 442.091454 
 127.192556 35.746000 463.081052 
 127.192667 35.746000 471.625342 
 127.192778 35.746000 484.604372 
 127.192889 35.746000 492.073813 
 127.193111 35.746000 478.597622 
 127.193333 35.746000 448.572202 
 127.193444 35.746000 446.414178 
 127.193556 35.746000 443.687003 
 127.193667 35.746000 441.278688 
 127.192556 35.746111 465.515888 
 127.192667 35.746111 476.523585 
 127.192778 35.746111 488.385451 
 127.192889 35.746111 493.464169 
 127.193111 35.746111 484.007387 
 127.193333 35.746111 448.614926 
 127.193444 35.746111 445.823486 
 127.193556 35.746111 442.598820 
 127.193667 35.746111 440.683150 
 127.192667 35.746111 476.523585 
 127.192778 35.746111 488.385451 
 127.192889 35.746111 493.464169 
 127.193000 35.746111 493.660161 
 127.193222 35.746111 459.105056 
 127.193444 35.746111 445.823486 
 127.193556 35.746111 442.598820 
 127.193667 35.746111 440.683150 
 127.193778 35.746111 439.918776 
 127.192667 35.746222 481.624831 
 127.192778 35.746222 491.077337 
 127.192889 35.746222 494.209966 
 127.193000 35.746222 494.162177 
 127.193222 35.746222 466.620779 
 127.193444 35.746222 445.134411 
 127.193556 35.746222 441.529402 
 127.193667 35.746222 440.123179 
 127.193778 35.746222 438.930962 
 127.192667 35.746333 486.142313 
 127.192778 35.746333 492.813876 
 127.192889 35.746333 494.555917 
 127.193000 35.746333 494.238154 
 127.193222 35.746333 476.676365 
 127.193444 35.746333 444.294686 
 127.193556 35.746333 440.395475 
 127.193667 35.746333 439.423088 
 127.193778 35.746333 436.802462 
 127.192778 35.746333 492.813876 
 127.192889 35.746333 494.555917 
 127.193000 35.746333 494.238154 
 127.193111 35.746333 491.020494 
 127.193333 35.746333 454.454835 
 127.193556 35.746333 440.395475 
 127.193667 35.746333 439.423088 
 127.193778 35.746333 436.802462 
 127.193889 35.746333 416.639594 
 127.192778 35.746444 493.840210 
 127.192889 35.746444 494.629474 
 127.193000 35.746444 494.097344 
 127.193111 35.746444 492.395041 
 127.193333 35.746444 461.981235 
 127.193556 35.746444 439.198873 
 127.193667 35.746444 438.511011 
 127.193778 35.746444 433.411124 
 127.193889 35.746444 410.671000 
 127.192778 35.746556 494.380700 
 127.192889 35.746556 494.509419 
 127.193000 35.746556 493.877521 
 127.193111 35.746556 492.931549 
 127.193333 35.746556 470.663645 
 127.193556 35.746556 438.228146 
 127.193667 35.746556 437.606569 
 127.193778 35.746556 430.364849 
 127.193889 35.746556 408.657506 
 127.192889 35.746556 494.509419 
 127.193000 35.746556 493.877521 
 127.193111 35.746556 492.931549 
 127.193222 35.746556 489.174268 
 127.193444 35.746556 443.912750 
 127.193667 35.746556 437.606569 
 127.193778 35.746556 430.364849 
 127.193889 35.746556 408.657506 
 127.194000 35.746556 403.608498 
 127.192889 35.746667 494.273891 
 127.193000 35.746667 493.664509 
 127.193111 35.746667 493.008805 
 127.193222 35.746667 490.564557 
 127.193444 35.746667 446.697815 
 127.193667 35.746667 437.175103 
 127.193778 35.746667 429.881759 
 127.193889 35.746667 409.636851 
 127.194000 35.746667 405.000727 
 127.192889 35.746778 494.006652 
 127.193000 35.746778 493.477450 
 127.193111 35.746778 492.773533 
 127.193222 35.746778 490.220206 
 127.193444 35.746778 452.674666 
 127.193667 35.746778 437.552288 
 127.193778 35.746778 432.639395 
 127.193889 35.746778 414.211421 
 127.194000 35.746778 408.610474 
 127.193000 35.746778 493.477450 
 127.193111 35.746778 492.773533 
 127.193222 35.746778 490.220206 
 127.193333 35.746778 480.480810 
 127.193556 35.746778 438.708633 
 127.193778 35.746778 432.639395 
 127.193889 35.746778 414.211421 
 127.194000 35.746778 408.610474 
 127.194111 35.746778 415.751385 
 127.193000 35.746889 493.286480 
 127.193111 35.746889 492.202717 
 127.193222 35.746889 488.931921 
 127.193333 35.746889 482.235410 
 127.193556 35.746889 441.281965 
 127.193778 35.746889 437.303884 
 127.193889 35.746889 423.318889 
 127.194000 35.746889 415.214781 
 127.194111 35.746889 419.003413 
 127.193000 35.747000 493.029709 
 127.193111 35.747000 491.217636 
 127.193222 35.747000 487.381519 
 127.193333 35.747000 483.166012 
 127.193556 35.747000 447.308532 
 127.193778 35.747000 441.472299 
 127.193889 35.747000 433.645024 
 127.194000 35.747000 422.189786 
 127.194111 35.747000 420.602118 
 127.193111 35.747000 491.217636 
 127.193222 35.747000 487.381519 
 127.193333 35.747000 483.166012 
 127.193444 35.747000 469.907488 
 127.193667 35.747000 441.585216 
 127.193889 35.747000 433.645024 
 127.194000 35.747000 422.189786 
 127.194111 35.747000 420.602118 
 127.194222 35.747000 420.769046 
 127.193111 35.747111 489.849738 
 127.193222 35.747111 486.100326 
 127.193333 35.747111 483.716853 
 127.193444 35.747111 477.020729 
 127.193667 35.747111 446.001563 
 127.193889 35.747111 439.911359 
 127.194000 35.747111 426.592916 
 127.194111 35.747111 421.654994 
 127.194222 35.747111 421.352360 
 127.193111 35.747222 488.326646 
 127.193222 35.747222 485.260217 
 127.193333 35.747222 484.143522 
 127.193444 35.747222 481.936683 
 127.193667 35.747222 452.897972 
 127.193889 35.747222 442.907519 
 127.194000 35.747222 430.158750 
 127.194111 35.747222 423.404749 
 127.194222 35.747222 422.543931 
 127.193222 35.747222 485.260217 
 127.193333 35.747222 484.143522 
 127.193444 35.747222 481.936683 
 127.193556 35.747222 471.605996 
 127.193778 35.747222 445.994063 
 127.194000 35.747222 430.158750 
 127.194111 35.747222 423.404749 
 127.194222 35.747222 422.543931 
 127.194333 35.747222 423.818145 
 127.193222 35.747333 484.801468 
 127.193333 35.747333 484.615734 
 127.193444 35.747333 485.040946 
 127.193556 35.747333 481.108073 
 127.193778 35.747333 448.543606 
 127.194000 35.747333 436.056957 
 127.194111 35.747333 427.432378 
 127.194222 35.747333 424.603055 
 127.194333 35.747333 424.561975 
 127.193222 35.747444 484.622511 
 127.193333 35.747444 485.244311 
 127.193444 35.747444 486.882535 
 127.193556 35.747444 485.819167 
 127.193778 35.747444 453.932289 
 127.194000 35.747444 445.563097 
 127.194111 35.747444 435.166295 
 127.194222 35.747444 427.308068 
 127.194333 35.747444 425.131830 
 127.193333 35.747444 485.244311 
 127.193444 35.747444 486.882535 
 127.193556 35.747444 485.819167 
 127.193667 35.747444 473.070628 
 127.193889 35.747444 450.794031 
 127.194111 35.747444 435.166295 
 127.194222 35.747444 427.308068 
 127.194333 35.747444 425.131830 
 127.194444 35.747444 425.553674 
 127.193333 35.747556 486.048500 
 127.193444 35.747556 487.926450 
 127.193556 35.747556 487.894785 
 127.193667 35.747556 481.818475 
 127.193889 35.747556 457.696246 
 127.194111 35.747556 444.909920 
 127.194222 35.747556 430.275602 
 127.194333 35.747556 425.890596 
 127.194444 35.747556 426.907621 
 127.193333 35.747667 486.915838 
 127.193444 35.747667 488.522195 
 127.193556 35.747667 488.937221 
 127.193667 35.747667 487.154091 
 127.193889 35.747667 463.478714 
 127.194111 35.747667 452.577619 
 127.194222 35.747667 433.866125 
 127.194333 35.747667 427.680644 
 127.194444 35.747667 429.831766 
 127.193444 35.747667 488.522195 
 127.193556 35.747667 488.937221 
 127.193667 35.747667 487.154091 
 127.193778 35.747667 475.897671 
 127.194000 35.747667 460.418667 
 127.194222 35.747667 433.866125 
 127.194333 35.747667 427.680644 
 127.194444 35.747667 429.831766 
 127.194556 35.747667 436.658953 
 127.193444 35.747778 488.928714 
 127.193556 35.747778 489.701707 
 127.193667 35.747778 489.720773 
 127.193778 35.747778 482.749204 
 127.194000 35.747778 462.953867 
 127.194222 35.747778 439.655573 
 127.194333 35.747778 432.650715 
 127.194444 35.747778 435.049861 
 127.194556 35.747778 439.216268 
 127.193444 35.747889 489.328175 
 127.193556 35.747889 490.421147 
 127.193667 35.747889 490.785968 
 127.193778 35.747889 485.724011 
 127.194000 35.747889 464.785194 
 127.194222 35.747889 450.122097 
 127.194333 35.747889 444.401881 
 127.194444 35.747889 442.243495 
 127.194556 35.747889 441.159502 
 127.193556 35.747889 490.421147 
 127.193667 35.747889 490.785968 
 127.193778 35.747889 485.724011 
 127.193889 35.747889 470.259551 
 127.194111 35.747889 461.400037 
 127.194333 35.747889 444.401881 
 127.194444 35.747889 442.243495 
 127.194556 35.747889 441.159502 
 127.194667 35.747889 443.533977 
 127.193556 35.748000 491.033292 
 127.193667 35.748000 491.167800 
 127.193778 35.748000 486.901085 
 127.193889 35.748000 473.310760 
 127.194111 35.748000 465.897585 
 127.194333 35.748000 462.149561 
 127.194444 35.748000 450.417938 
 127.194556 35.748000 443.276871 
 127.194667 35.748000 446.907908 
 127.193556 35.748111 491.421920 
 127.193667 35.748111 491.164422 
 127.193778 35.748111 486.976067 
 127.193889 35.748111 476.319156 
 127.194111 35.748111 471.417044 
 127.194333 35.748111 476.596938 
 127.194444 35.748111 458.983941 
 127.194556 35.748111 446.433503 
 127.194667 35.748111 452.099431 
 127.193667 35.748111 491.164422 
 127.193778 35.748111 486.976067 
 127.193889 35.748111 476.319156 
 127.194000 35.748111 471.303339 
 127.194222 35.748111 478.009321 
 127.194444 35.748111 458.983941 
 127.194556 35.748111 446.433503 
 127.194667 35.748111 452.099431 
 127.194778 35.748111 463.514124 
 127.193667 35.748222 490.767473 
 127.193778 35.748222 486.054014 
 127.193889 35.748222 478.613732 
 127.194000 35.748222 475.428991 
 127.194222 35.748222 484.153824 
 127.194444 35.748222 467.426220 
 127.194556 35.748222 451.386084 
 127.194667 35.748222 458.220598 
 127.194778 35.748222 466.333537 
 127.193667 35.748333 489.740851 
 127.193778 35.748333 484.383927 
 127.193889 35.748333 479.845158 
 127.194000 35.748333 478.083028 
 127.194222 35.748333 485.164502 
 127.194444 35.748333 474.564931 
 127.194556 35.748333 458.034286 
 127.194667 35.748333 463.356923 
 127.194778 35.748333 467.784443 
 127.193778 35.748333 484.383927 
 127.193889 35.748333 479.845158 
 127.194000 35.748333 478.083028 
 127.194111 35.748333 478.527870 
 127.194333 35.748333 486.247940 
 127.194556 35.748333 458.034286 
 127.194667 35.748333 463.356923 
 127.194778 35.748333 467.784443 
 127.194889 35.748333 468.826640 
 127.193778 35.748444 482.684250 
 127.193889 35.748444 480.274698 
 127.194000 35.748444 478.890827 
 127.194111 35.748444 477.316578 
 127.194333 35.748444 485.588520 
 127.194556 35.748444 464.349261 
 127.194667 35.748444 466.439480 
 127.194778 35.748444 468.452680 
 127.194889 35.748444 469.000131 
 127.193778 35.748556 481.533896 
 127.193889 35.748556 480.239077 
 127.194000 35.748556 478.189708 
 127.194111 35.748556 473.139750 
 127.194333 35.748556 481.326126 
 127.194556 35.748556 467.743563 
 127.194667 35.748556 467.816934 
 127.194778 35.748556 468.749773 
 127.194889 35.748556 469.081329 
 127.193889 35.748556 480.239077 
 127.194000 35.748556 478.189708 
 127.194111 35.748556 473.139750 
 127.194222 35.748556 475.548052 
 127.194444 35.748556 477.614324 
 127.194667 35.748556 467.816934 
 127.194778 35.748556 468.749773 
 127.194889 35.748556 469.081329 
 127.195000 35.748556 468.215248 
 127.193889 35.748667 479.822476 
 127.194000 35.748667 476.016792 
 127.194111 35.748667 467.292620 
 127.194222 35.748667 466.694030 
 127.194444 35.748667 472.560867 
 127.194667 35.748667 468.152184 
 127.194778 35.748667 468.854409 
 127.194889 35.748667 469.003702 
 127.195000 35.748667 467.078259 
 127.193889 35.748778 478.849912 
 127.194000 35.748778 472.216579 
 127.194111 35.748778 461.839878 
 127.194222 35.748778 459.901393 
 127.194444 35.748778 467.756546 
 127.194667 35.748778 467.893062 
 127.194778 35.748778 468.729925 
 127.194889 35.748778 468.612026 
 127.195000 35.748778 465.084816 
 127.194000 35.748778 472.216579 
 127.194111 35.748778 461.839878 
 127.194222 35.748778 459.901393 
 127.194333 35.748778 464.812628 
 127.194556 35.748778 467.360522 
 127.194778 35.748778 468.729925 
 127.194889 35.748778 468.612026 
 127.195000 35.748778 465.084816 
 127.195111 35.748778 454.350466 
 127.194000 35.748889 467.207181 
 127.194111 35.748889 458.133858 
 127.194222 35.748889 456.458194 
 127.194333 35.748889 459.666358 
 127.194556 35.748889 466.499541 
 127.194778 35.748889 467.997010 
 127.194889 35.748889 467.478745 
 127.195000 35.748889 461.893165 
 127.195111 35.748889 451.053717 
 127.194000 35.749000 462.291140 
 127.194111 35.749000 456.069109 
 127.194222 35.749000 454.836302 
 127.194333 35.749000 456.240897 
 127.194556 35.749000 465.011596 
 127.194778 35.749000 465.337883 
 127.194889 35.749000 464.276318 
 127.195000 35.749000 457.128059 
 127.195111 35.749000 448.241128 
 127.194111 35.749000 456.069109 
 127.194222 35.749000 454.836302 
 127.194333 35.749000 456.240897 
 127.194444 35.749000 461.699903 
 127.194667 35.749000 465.920971 
 127.194889 35.749000 464.276318 
 127.195000 35.749000 457.128059 
 127.195111 35.749000 448.241128 
 127.195222 35.749000 444.859451 
 127.194111 35.749111 454.948161 
 127.194222 35.749111 453.369789 
 127.194333 35.749111 450.924540 
 127.194444 35.749111 454.998067 
 127.194667 35.749111 462.608964 
 127.194889 35.749111 455.282513 
 127.195000 35.749111 450.068961 
 127.195111 35.749111 445.126437 
 127.195222 35.749111 441.671345 
 127.194111 35.749222 454.110605 
 127.194222 35.749222 450.384352 
 127.194333 35.749222 439.849388 
 127.194444 35.749222 441.018310 
 127.194667 35.749222 453.982130 
 127.194889 35.749222 435.256603 
 127.195000 35.749222 439.292535 
 127.195111 35.749222 440.136503 
 127.195222 35.749222 435.222794 
 127.194222 35.749333 443.430057 
 127.194333 35.749333 422.342546 
 127.194444 35.749333 420.750348 
 127.194556 35.749333 433.998937 
 127.194778 35.749333 410.531759 
 127.195000 35.749333 424.028935 
 127.195111 35.749333 431.224322 
 127.195222 35.749333 424.737970 
 127.195333 35.749333 413.729154 
 127.194222 35.749444 430.399358 
 127.194333 35.749444 405.293628 
 127.194444 35.749444 402.995798 
 127.194556 35.749444 411.498352 
 127.194778 35.749444 393.355629 
 127.195000 35.749444 408.359615 
 127.195111 35.749444 418.793660 
 127.195222 35.749444 413.686085 
 127.195333 35.749444 407.796296 
 127.194222 35.749556 413.823434 
 127.194333 35.749556 394.714566 
 127.194444 35.749556 392.723402 
 127.194556 35.749556 393.471438 
 127.194778 35.749556 384.920780 
 127.195000 35.749556 398.000400 
 127.195111 35.749556 407.833708 
 127.195222 35.749556 406.661765 
 127.195333 35.749556 406.396535 
 127.194333 35.749556 394.714566 
 127.194444 35.749556 392.723402 
 127.194556 35.749556 393.471438 
 127.194667 35.749556 385.169561 
 127.194889 35.749556 389.853484 
 127.195111 35.749556 407.833708 
 127.195222 35.749556 406.661765 
 127.195333 35.749556 406.396535 
 127.195444 35.749556 410.918341 
 127.194333 35.749667 389.727954 
 127.194444 35.749667 387.633877 
 127.194556 35.749667 381.727722 
 127.194667 35.749667 371.297519 
 127.194889 35.749667 387.234971 
 127.195111 35.749667 401.680090 
 127.195222 35.749667 403.849872 
 127.195333 35.749667 407.430576 
 127.195444 35.749667 412.921907 
 127.194333 35.749778 387.480880 
 127.194444 35.749778 384.352666 
 127.194556 35.749778 372.880062 
 127.194667 35.749778 363.086365 
 127.194889 35.749778 384.763703 
 127.195111 35.749778 398.668956 
 127.195222 35.749778 403.171507 
 127.195333 35.749778 409.054990 
 127.195444 35.749778 414.242777 
 127.194444 35.749778 384.352666 
 127.194556 35.749778 372.880062 
 127.194667 35.749778 363.086365 
 127.194778 35.749778 373.772637 
 127.195000 35.749778 390.304115 
 127.195222 35.749778 403.171507 
 127.195333 35.749778 409.054990 
 127.195444 35.749778 414.242777 
 127.195556 35.749778 418.780057 
 127.194444 35.749889 380.736994 
 127.194556 35.749889 365.182107 
 127.194667 35.749889 357.933663 
 127.194778 35.749889 368.167132 
 127.195000 35.749889 387.029962 
 127.195222 35.749889 402.834024 
 127.195333 35.749889 410.009765 
 127.195444 35.749889 414.804977 
 127.195556 35.749889 419.692815 
 127.194444 35.750000 375.606829 
 127.194556 35.750000 358.981732 
 127.194667 35.750000 354.704587 
 127.194778 35.750000 362.961160 
 127.195000 35.750000 380.620476 
 127.195222 35.750000 400.855368 
 127.195333 35.750000 409.059592 
 127.195444 35.750000 414.210556 
 127.195556 35.750000 419.782229 
 127.194556 35.750000 358.981732 
 127.194667 35.750000 354.704587 
 127.194778 35.750000 362.961160 
 127.194889 35.750000 375.344435 
 127.195111 35.750000 390.316672 
 127.195333 35.750000 409.059592 
 127.195444 35.750000 414.210556 
 127.195556 35.750000 419.782229 
 127.195667 35.750000 420.198511 
 127.194556 35.750111 354.762527 
 127.194667 35.750111 352.734331 
 127.194778 35.750111 358.589620 
 127.194889 35.750111 367.433252 
 127.195111 35.750111 379.616996 
 127.195333 35.750111 404.399391 
 127.195444 35.750111 411.186249 
 127.195556 35.750111 418.697644 
 127.195667 35.750111 418.426468 
 127.194556 35.750222 352.304643 
 127.194667 35.750222 351.565993 
 127.194778 35.750222 355.236599 
 127.194889 35.750222 359.481468 
 127.195111 35.750222 368.652096 
 127.195333 35.750222 395.918607 
 127.195444 35.750222 404.100145 
 127.195556 35.750222 415.525427 
 127.195667 35.750222 415.726530 
 127.194667 35.750222 351.565993 
 127.194778 35.750222 355.236599 
 127.194889 35.750222 359.481468 
 127.195000 35.750222 360.012902 
 127.195222 35.750222 386.626705 
 127.195444 35.750222 404.100145 
 127.195556 35.750222 415.525427 
 127.195667 35.750222 415.726530 
 127.195778 35.750222 413.734074 
 127.194667 35.750333 350.887928 
 127.194778 35.750333 352.898023 
 127.194889 35.750333 354.219882 
 127.195000 35.750333 354.495275 
 127.195222 35.750333 381.419502 
 127.195444 35.750333 395.399098 
 127.195556 35.750333 410.819549 
 127.195667 35.750333 413.700717 
 127.195778 35.750333 413.421427 
 127.194667 35.750444 350.527241 
 127.194778 35.750444 351.522230 
 127.194889 35.750444 351.843965 
 127.195000 35.750444 352.396083 
 127.195222 35.750444 378.984619 
 127.195444 35.750444 390.179393 
 127.195556 35.750444 407.363602 
 127.195667 35.750444 412.734676 
 127.195778 35.750444 413.254376 
 127.194778 35.750444 351.522230 
 127.194889 35.750444 351.843965 
 127.195000 35.750444 352.396083 
 127.195111 35.750444 360.882052 
 127.195333 35.750444 385.080812 
 127.195556 35.750444 407.363602 
 127.195667 35.750444 412.734676 
 127.195778 35.750444 413.254376 
 127.195889 35.750444 413.326983 
 127.194778 35.750556 350.888507 
 127.194889 35.750556 350.990710 
 127.195000 35.750556 351.618050 
 127.195111 35.750556 359.379553 
 127.195333 35.750556 383.074253 
 127.195556 35.750556 404.107479 
 127.195667 35.750556 411.635591 
 127.195778 35.750556 412.998080 
 127.195889 35.750556 413.264167 
 127.194778 35.750667 350.664116 
 127.194889 35.750667 350.695819 
 127.195000 35.750667 351.121105 
 127.195111 35.750667 357.060917 
 127.195333 35.750667 380.075492 
 127.195556 35.750667 398.039011 
 127.195667 35.750667 408.800134 
 127.195778 35.750667 412.389625 
 127.195889 35.750667 413.047055 
 127.194889 35.750667 350.695819 
 127.195000 35.750667 351.121105 
 127.195111 35.750667 357.060917 
 127.195222 35.750667 371.981885 
 127.195444 35.750667 384.541034 
 127.195667 35.750667 408.800134 
 127.195778 35.750667 412.389625 
 127.195889 35.750667 413.047055 
 127.196000 35.750667 414.351690 
 127.194889 35.750778 350.538630 
 127.195000 35.750778 350.412740 
 127.195111 35.750778 353.221397 
 127.195222 35.750778 363.898158 
 127.195444 35.750778 380.283700 
 127.195667 35.750778 402.059970 
 127.195778 35.750778 410.664994 
 127.195889 35.750778 412.100273 
 127.196000 35.750778 414.276906 
 127.194889 35.750889 350.331654 
 127.195000 35.750889 349.136202 
 127.195111 35.750889 348.319550 
 127.195222 35.750889 354.046652 
 127.195444 35.750889 375.436866 
 127.195667 35.750889 391.454486 
 127.195778 35.750889 405.466903 
 127.195889 35.750889 408.248606 
 127.196000 35.750889 413.029891 
 127.195000 35.750889 349.136202 
 127.195111 35.750889 348.319550 
 127.195222 35.750889 354.046652 
 127.195333 35.750889 365.218026 
 127.195556 35.750889 380.622010 
 127.195778 35.750889 405.466903 
 127.195889 35.750889 408.248606 
 127.196000 35.750889 413.029891 
 127.196111 35.750889 411.039482 
 127.195000 35.751000 347.109719 
 127.195111 35.751000 344.025931 
 127.195222 35.751000 346.429279 
 127.195333 35.751000 356.415831 
 127.195556 35.751000 376.446704 
 127.195778 35.751000 393.458711 
 127.195889 35.751000 396.611847 
 127.196000 35.751000 405.938959 
 127.196111 35.751000 401.248323 
 127.195000 35.751111 344.623711 
 127.195111 35.751111 341.335582 
 127.195222 35.751111 342.279207 
 127.195333 35.751111 350.258570 
 127.195556 35.751111 373.370518 
 127.195778 35.751111 379.721635 
 127.195889 35.751111 380.412451 
 127.196000 35.751111 385.901881 
 127.196111 35.751111 385.930622 
 127.195111 35.751111 341.335582 
 127.195222 35.751111 342.279207 
 127.195333 35.751111 350.258570 
 127.195444 35.751111 367.024727 
 127.195667 35.751111 376.307855 
 127.195889 35.751111 380.412451 
 127.196000 35.751111 385.901881 
 127.196111 35.751111 385.930622 
 127.196222 35.751111 379.239779 
 127.195111 35.751222 339.973665 
 127.195222 35.751222 340.316843 
 127.195333 35.751222 345.822700 
 127.195444 35.751222 360.424707 
 127.195667 35.751222 372.102397 
 127.195889 35.751222 372.396944 
 127.196000 35.751222 374.775666 
 127.196111 35.751222 379.356473 
 127.196222 35.751222 377.676228 
 127.195111 35.751333 339.321893 
 127.195222 35.751333 339.162172 
 127.195333 35.751333 340.981799 
 127.195444 35.751333 349.707757 
 127.195667 35.751333 366.208477 
 127.195889 35.751333 369.007111 
 127.196000 35.751333 372.486377 
 127.196111 35.751333 377.819649 
 127.196222 35.751333 375.155750 
 127.195222 35.751333 339.162172 
 127.195333 35.751333 340.981799 
 127.195444 35.751333 349.707757 
 127.195556 35.751333 358.671383 
 127.195778 35.751333 369.111073 
 127.196000 35.751333 372.486377 
 127.196111 35.751333 377.819649 
 127.196222 35.751333 375.155750 
 127.196333 35.751333 363.413824 
 127.195222 35.751444 337.901650 
 127.195333 35.751444 334.596121 
 127.195444 35.751444 336.810131 
 127.195556 35.751444 344.576208 
 127.195778 35.751444 363.392380 
 127.196000 35.751444 369.361529 
 127.196111 35.751444 375.938841 
 127.196222 35.751444 370.483668 
 127.196333 35.751444 359.871888 
 127.195222 35.751556 335.794486 
 127.195333 35.751556 327.632870 
 127.195444 35.751556 326.410071 
 127.195556 35.751556 330.523542 
 127.195778 35.751556 348.832762 
 127.196000 35.751556 355.655967 
 127.196111 35.751556 369.110702 
 127.196222 35.751556 362.812585 
 127.196333 35.751556 356.755854 
 127.195333 35.751556 327.632870 
 127.195444 35.751556 326.410071 
 127.195556 35.751556 330.523542 
 127.195667 35.751556 337.834680 
 127.195889 35.751556 347.004188 
 127.196111 35.751556 369.110702 
 127.196222 35.751556 362.812585 
 127.196333 35.751556 356.755854 
 127.196444 35.751556 353.762147 
 127.195333 35.751667 322.185330 
 127.195444 35.751667 320.306748 
 127.195556 35.751667 320.167335 
 127.195667 35.751667 318.138920 
 127.195889 35.751667 327.007389 
 127.196111 35.751667 351.461497 
 127.196222 35.751667 352.310120 
 127.196333 35.751667 352.960023 
 127.196444 35.751667 348.752593 
 127.195333 35.751778 318.938497 
 127.195444 35.751778 316.941370 
 127.195556 35.751778 312.350644 
 127.195667 35.751778 303.850247 
 127.195889 35.751778 316.522845 
 127.196111 35.751778 330.267014 
 127.196222 35.751778 340.087131 
 127.196333 35.751778 346.725926 
 127.196444 35.751778 339.863912 
 127.195444 35.751778 316.941370 
 127.195556 35.751778 312.350644 
 127.195667 35.751778 303.850247 
 127.195778 35.751778 312.010528 
 127.196000 35.751778 317.856159 
 127.196222 35.751778 340.087131 
 127.196333 35.751778 346.725926 
 127.196444 35.751778 339.863912 
 127.196556 35.751778 319.679625 
 127.195444 35.751889 314.277852 
 127.195556 35.751889 304.869781 
 127.195667 35.751889 295.764093 
 127.195778 35.751889 305.286826 
 127.196000 35.751889 314.061842 
 127.196222 35.751889 328.441771 
 127.196333 35.751889 336.934317 
 127.196444 35.751889 328.684920 
 127.196556 35.751889 315.690892 
 127.195444 35.752000 310.849963 
 127.195556 35.752000 297.844288 
 127.195667 35.752000 291.434765 
 127.195778 35.752000 300.974100 
 127.196000 35.752000 311.871913 
 127.196222 35.752000 320.391917 
 127.196333 35.752000 326.147025 
 127.196444 35.752000 320.052109 
 127.196556 35.752000 313.840018 
 127.195556 35.752000 297.844288 
 127.195667 35.752000 291.434765 
 127.195778 35.752000 300.974100 
 127.195889 35.752000 309.839478 
 127.196111 35.752000 315.449881 
 127.196333 35.752000 326.147025 
 127.196444 35.752000 320.052109 
 127.196556 35.752000 313.840018 
 127.196667 35.752000 311.142357 
 127.195556 35.752111 292.582382 
 127.195667 35.752111 289.090062 
 127.195778 35.752111 296.997286 
 127.195889 35.752111 304.955461 
 127.196111 35.752111 313.905013 
 127.196333 35.752111 318.867941 
 127.196444 35.752111 315.744616 
 127.196556 35.752111 312.689562 
 127.196667 35.752111 308.607592 
 127.195556 35.752222 289.415472 
 127.195667 35.752222 287.831442 
 127.195778 35.752222 293.336879 
 127.195889 35.752222 298.105771 
 127.196111 35.752222 312.713194 
 127.196333 35.752222 315.900689 
 127.196444 35.752222 314.138771 
 127.196556 35.752222 311.289812 
 127.196667 35.752222 304.781717 
 127.195667 35.752222 287.831442 
 127.195778 35.752222 293.336879 
 127.195889 35.752222 298.105771 
 127.196000 35.752222 302.596878 
 127.196222 35.752222 315.040563 
 127.196444 35.752222 314.138771 
 127.196556 35.752222 311.289812 
 127.196667 35.752222 304.781717 
 127.196778 35.752222 296.635203 
 127.195667 35.752333 287.213912 
 127.195778 35.752333 290.647538 
 127.195889 35.752333 292.779024 
 127.196000 35.752333 297.551899 
 127.196222 35.752333 314.945764 
 127.196444 35.752333 313.732350 
 127.196556 35.752333 309.002773 
 127.196667 35.752333 300.425734 
 127.196778 35.752333 294.095551 
 127.195667 35.752445 287.054706 
 127.195778 35.752445 289.300876 
 127.195889 35.752445 290.596612 
 127.196000 35.752445 295.624917 
 127.196222 35.752445 315.586383 
 127.196444 35.752445 314.037256 
 127.196556 35.752445 305.724568 
 127.196667 35.752445 296.802701 
 127.196778 35.752445 292.389687 
 127.195778 35.752445 289.300876 
 127.195889 35.752445 290.596612 
 127.196000 35.752445 295.624917 
 127.196111 35.752445 309.606273 
 127.196333 35.752445 316.744012 
 127.196556 35.752445 305.724568 
 127.196667 35.752445 296.802701 
 127.196778 35.752445 292.389687 
 127.196889 35.752445 287.761151 
 127.195778 35.752556 288.944694 
 127.195889 35.752556 290.622611 
 127.196000 35.752556 297.076965 
 127.196111 35.752556 308.615115 
 127.196333 35.752556 317.917347 
 127.196556 35.752556 302.324126 
 127.196667 35.752556 294.414709 
 127.196778 35.752556 290.864521 
 127.196889 35.752556 285.211842 
 127.195778 35.752667 289.177824 
 127.195889 35.752667 292.320604 
 127.196000 35.752667 300.374650 
 127.196111 35.752667 308.342330 
 127.196333 35.752667 318.247864 
 127.196556 35.752667 299.901821 
 127.196667 35.752667 292.921453 
 127.196778 35.752667 289.028316 
 127.196889 35.752667 282.840938 
 127.195889 35.752667 292.320604 
 127.196000 35.752667 300.374650 
 127.196111 35.752667 308.342330 
 127.196222 35.752667 316.302114 
 127.196444 35.752667 314.691127 
 127.196667 35.752667 292.921453 
 127.196778 35.752667 289.028316 
 127.196889 35.752667 282.840938 
 127.197000 35.752667 279.108270 
 127.195889 35.752778 295.576222 
 127.196000 35.752778 303.335486 
 127.196111 35.752778 308.149938 
 127.196222 35.752778 315.405566 
 127.196444 35.752778 313.001196 
 127.196667 35.752778 291.844392 
 127.196778 35.752778 286.801283 
 127.196889 35.752778 281.029962 
 127.197000 35.752778 277.894483 
 127.195889 35.752889 299.547206 
 127.196000 35.752889 305.049147 
 127.196111 35.752889 307.658359 
 127.196222 35.752889 313.234639 
 127.196444 35.752889 309.222828 
 127.196667 35.752889 291.024241 
 127.196778 35.752889 284.610785 
 127.196889 35.752889 279.674549 
 127.197000 35.752889 276.044361 
 127.196000 35.752889 305.049147 
 127.196111 35.752889 307.658359 
 127.196222 35.752889 313.234639 
 127.196333 35.752889 315.272278 
 127.196556 35.752889 296.432952 
 127.196778 35.752889 284.610785 
 127.196889 35.752889 279.674549 
 127.197000 35.752889 276.044361 
 127.197111 35.752889 265.897111 
 127.196000 35.753000 305.725619 
 127.196111 35.753000 306.501882 
 127.196222 35.753000 309.136699 
 127.196333 35.753000 310.745383 
 127.196556 35.753000 294.579312 
 127.196778 35.753000 282.947800 
 127.196889 35.753000 278.213493 
 127.197000 35.753000 273.034530 
 127.197111 35.753000 262.424545 
 127.196000 35.753111 305.609177 
 127.196111 35.753111 304.190638 
 127.196222 35.753111 303.844939 
 127.196333 35.753111 304.661307 
 127.196556 35.753111 293.293975 
 127.196778 35.753111 281.439040 
 127.196889 35.753111 275.559515 
 127.197000 35.753111 268.798754 
 127.197111 35.753111 260.089584 
 127.196111 35.753111 304.190638 
 127.196222 35.753111 303.844939 
 127.196333 35.753111 304.661307 
 127.196444 35.753111 298.847452 
 127.196667 35.753111 290.581612 
 127.196889 35.753111 275.559515 
 127.197000 35.753111 268.798754 
 127.197111 35.753111 260.089584 
 127.197222 35.753111 257.578847 
 127.196111 35.753222 301.064600 
 127.196222 35.753222 299.817523 
 127.196333 35.753222 299.678026 
 127.196444 35.753222 295.338752 
 127.196667 35.753222 290.220008 
 127.196889 35.753222 270.594536 
 127.197000 35.753222 264.267160 
 127.197111 35.753222 258.516643 
 127.197222 35.753222 256.380142 
 127.196111 35.753333 298.637665 
 127.196222 35.753333 297.805800 
 127.196333 35.753333 296.731791 
 127.196444 35.753333 292.922760 
 127.196667 35.753333 289.146719 
 127.196889 35.753333 264.701853 
 127.197000 35.753333 260.746537 
 127.197111 35.753333 256.978771 
 127.197222 35.753333 253.796999 
 127.196111 35.753445 297.456728 
 127.196222 35.753445 296.876950 
 127.196333 35.753445 294.530344 
 127.196444 35.753445 290.338616 
 127.196667 35.753445 286.981811 
 127.196889 35.753445 260.913946 
 127.197000 35.753445 258.647461 
 127.197111 35.753445 254.679222 
 127.197222 35.753445 249.413989 
 127.196222 35.753445 296.876950 
 127.196333 35.753445 294.530344 
 127.196444 35.753445 290.338616 
 127.196556 35.753445 290.213749 
 127.196778 35.753445 269.563049 
 127.197000 35.753445 258.647461 
 127.197111 35.753445 254.679222 
 127.197222 35.753445 249.413989 
 127.197333 35.753445 243.950663 
 127.196222 35.753556 296.132025 
 127.196333 35.753556 291.676370 
 127.196444 35.753556 287.154408 
 127.196556 35.753556 287.633310 
 127.196778 35.753556 265.900295 
 127.197000 35.753556 257.514972 
 127.197111 35.753556 251.390180 
 127.197222 35.753556 244.767512 
 127.197333 35.753556 240.024543 
 127.196222 35.753667 294.858634 
 127.196333 35.753667 287.964957 
 127.196444 35.753667 284.252728 
 127.196556 35.753667 284.250342 
 127.196778 35.753667 263.709767 
 127.197000 35.753667 256.748556 
 127.197111 35.753667 247.944693 
 127.197222 35.753667 241.559251 
 127.197333 35.753667 237.404401 
 127.196333 35.753667 287.964957 
 127.196444 35.753667 284.252728 
 127.196556 35.753667 284.250342 
 127.196667 35.753667 278.161312 
 127.196889 35.753667 258.894305 
 127.197111 35.753667 247.944693 
 127.197222 35.753667 241.559251 
 127.197333 35.753667 237.404401 
 127.197444 35.753667 230.882321 
 127.196333 35.753778 284.655528 
 127.196444 35.753778 282.305481 
 127.196556 35.753778 280.861084 
 127.196667 35.753778 272.836357 
 127.196889 35.753778 258.900053 
 127.197111 35.753778 245.006437 
 127.197222 35.753778 239.530125 
 127.197333 35.753778 235.195175 
 127.197444 35.753778 229.661685 
 127.196333 35.753889 282.582591 
 127.196444 35.753889 281.014445 
 127.196556 35.753889 277.576092 
 127.196667 35.753889 268.965029 
 127.196889 35.753889 259.113250 
 127.197111 35.753889 241.919570 
 127.197222 35.753889 237.581555 
 127.197333 35.753889 233.046697 
 127.197444 35.753889 228.707084 
 127.196444 35.753889 281.014445 
 127.196556 35.753889 277.576092 
 127.196667 35.753889 268.965029 
 127.196778 35.753889 263.125663 
 127.197000 35.753889 253.923961 
 127.197222 35.753889 237.581555 
 127.197333 35.753889 233.046697 
 127.197444 35.753889 228.707084 
 127.197556 35.753889 226.607574 
 127.196444 35.754000 279.783552 
 127.196556 35.754000 274.120673 
 127.196667 35.754000 266.795751 
 127.196778 35.754000 263.522294 
 127.197000 35.754000 249.804833 
 127.197222 35.754000 235.056342 
 127.197333 35.754000 231.133235 
 127.197444 35.754000 227.673568 
 127.197556 35.754000 224.788962 
 127.196444 35.754111 277.980761 
 127.196556 35.754111 270.664716 
 127.196667 35.754111 265.660602 
 127.196778 35.754111 263.404248 
 127.197000 35.754111 244.187878 
 127.197222 35.754111 232.606059 
 127.197333 35.754111 229.662368 
 127.197444 35.754111 226.155936 
 127.197556 35.754111 222.137521 
 127.196556 35.754111 270.664716 
 127.196667 35.754111 265.660602 
 127.196778 35.754111 263.404248 
 127.196889 35.754111 257.477503 
 127.197111 35.754111 234.484649 
 127.197333 35.754111 229.662368 
 127.197444 35.754111 226.155936 
 127.197556 35.754111 222.137521 
 127.197667 35.754111 217.396876 
 127.196556 35.754222 267.895926 
 127.196667 35.754222 264.935798 
 127.196778 35.754222 262.377418 
 127.196889 35.754222 254.208091 
 127.197111 35.754222 233.051765 
 127.197333 35.754222 228.621169 
 127.197444 35.754222 223.916228 
 127.197556 35.754222 219.283999 
 127.197667 35.754222 215.622918 
 127.196556 35.754333 266.152352 
 127.196667 35.754333 264.151877 
 127.196778 35.754333 260.138191 
 127.196889 35.754333 250.352502 
 127.197111 35.754333 233.000999 
 127.197333 35.754333 227.833591 
 127.197444 35.754333 221.365651 
 127.197556 35.754333 217.079866 
 127.197667 35.754333 214.349253 
 127.196667 35.754333 264.151877 
 127.196778 35.754333 260.138191 
 127.196889 35.754333 250.352502 
 127.197000 35.754333 239.594821 
 127.197222 35.754333 230.864741 
 127.197444 35.754333 221.365651 
 127.197556 35.754333 217.079866 
 127.197667 35.754333 214.349253 
 127.197778 35.754333 212.110358 
 127.196667 35.754444 262.844719 
 127.196778 35.754444 256.570677 
 127.196889 35.754444 247.234738 
 127.197000 35.754444 239.843239 
 127.197222 35.754444 230.535503 
 127.197444 35.754444 219.309773 
 127.197556 35.754444 215.652458 
 127.197667 35.754444 213.302762 
 127.197778 35.754444 211.454743 
 127.196667 35.754555 260.496295 
 127.196778 35.754555 252.312139 
 127.196889 35.754555 245.281713 
 127.197000 35.754555 240.283654 
 127.197222 35.754555 229.591642 
 127.197444 35.754555 217.968897 
 127.197556 35.754555 214.631243 
 127.197667 35.754555 212.360452 
 127.197778 35.754555 211.024477 
 127.196778 35.754555 252.312139 
 127.196889 35.754555 245.281713 
 127.197000 35.754555 240.283654 
 127.197111 35.754555 233.592660 
 127.197333 35.754555 225.855909 
 127.197556 35.754555 214.631243 
 127.197667 35.754555 212.360452 
 127.197778 35.754555 211.024477 
 127.197889 35.754555 213.001781 
 127.196778 35.754667 248.582592 
 127.196889 35.754667 244.199970 
 127.197000 35.754667 240.349453 
 127.197111 35.754667 232.738227 
 127.197333 35.754667 223.438104 
 127.197556 35.754667 213.675753 
 127.197667 35.754667 211.476171 
 127.197778 35.754667 210.696023 
 127.197889 35.754667 213.593032 
 127.196778 35.754778 246.122085 
 127.196889 35.754778 243.541962 
 127.197000 35.754778 239.596589 
 127.197111 35.754778 229.959375 
 127.197333 35.754778 219.388985 
 127.197556 35.754778 212.579378 
 127.197667 35.754778 210.517699 
 127.197778 35.754778 210.132745 
 127.197889 35.754778 213.697319 
 127.196889 35.754778 243.541962 
 127.197000 35.754778 239.596589 
 127.197111 35.754778 229.959375 
 127.197222 35.754778 222.586643 
 127.197444 35.754778 215.445496 
 127.197667 35.754778 210.517699 
 127.197778 35.754778 210.132745 
 127.197889 35.754778 213.697319 
 127.198000 35.754778 216.027817 
 127.196889 35.754889 242.917672 
 127.197000 35.754889 237.575035 
 127.197111 35.754889 225.338631 
 127.197222 35.754889 217.743317 
 127.197444 35.754889 212.729136 
 127.197667 35.754889 209.088844 
 127.197778 35.754889 208.798840 
 127.197889 35.754889 213.084481 
 127.198000 35.754889 216.022795 
 127.196889 35.755000 241.983369 
 127.197000 35.755000 233.966687 
 127.197111 35.755000 220.434745 
 127.197222 35.755000 214.425727 
 127.197444 35.755000 208.237095 
 127.197667 35.755000 206.671535 
 127.197778 35.755000 206.455604 
 127.197889 35.755000 211.570817 
 127.198000 35.755000 216.000676 
 127.197000 35.755000 233.966687 
 127.197111 35.755000 220.434745 
 127.197222 35.755000 214.425727 
 127.197333 35.755000 211.912406 
 127.197556 35.755000 207.832585 
 127.197778 35.755000 206.455604 
 127.197889 35.755000 211.570817 
 127.198000 35.755000 216.000676 
 127.198111 35.755000 219.528620 
 127.197000 35.755111 228.999995 
 127.197111 35.755111 216.684189 
 127.197222 35.755111 212.510909 
 127.197333 35.755111 209.327044 
 127.197556 35.755111 202.179927 
 127.197778 35.755111 203.794002 
 127.197889 35.755111 209.209901 
 127.198000 35.755111 216.093267 
 127.198111 35.755111 220.560880 
 127.197000 35.755222 223.644251 
 127.197111 35.755222 214.269467 
 127.197222 35.755222 211.077212 
 127.197333 35.755222 206.270800 
 127.197556 35.755222 196.145903 
 127.197778 35.755222 201.774511 
 127.197889 35.755222 206.581912 
 127.198000 35.755222 216.422524 
 127.198111 35.755222 221.151410 
 127.197111 35.755222 214.269467 
 127.197222 35.755222 211.077212 
 127.197333 35.755222 206.270800 
 127.197444 35.755222 197.636259 
 127.197667 35.755222 200.748072 
 127.197889 35.755222 206.581912 
 127.198000 35.755222 216.422524 
 127.198111 35.755222 221.151410 
 127.198222 35.755222 221.899607 
 127.197111 35.755333 212.703564 
 127.197222 35.755333 209.353938 
 127.197333 35.755333 202.325944 
 127.197444 35.755333 193.710321 
 127.197667 35.755333 198.923362 
 127.197889 35.755333 204.583662 
 127.198000 35.755333 216.753213 
 127.198111 35.755333 221.233750 
 127.198222 35.755333 221.914953 
 127.197111 35.755444 211.390399 
 127.197222 35.755444 206.761065 
 127.197333 35.755444 197.952255 
 127.197444 35.755444 191.167313 
 127.197667 35.755444 197.854164 
 127.197889 35.755444 203.621642 
 127.198000 35.755444 216.349499 
 127.198111 35.755444 220.681204 
 127.198222 35.755444 221.822058 
 127.197222 35.755444 206.761065 
 127.197333 35.755444 197.952255 
 127.197444 35.755444 191.167313 
 127.197556 35.755444 190.794148 
 127.197778 35.755444 200.349407 
 127.198000 35.755444 216.349499 
 127.198111 35.755444 220.681204 
 127.198222 35.755444 221.822058 
 127.198333 35.755444 223.610158 
 127.197222 35.755555 203.080234 
 127.197333 35.755555 194.134101 
 127.197444 35.755555 189.727856 
 127.197556 35.755555 190.239269 
 127.197778 35.755555 200.497087 
 127.198000 35.755555 214.605102 
 127.198111 35.755555 219.154880 
 127.198222 35.755555 221.520054 
 127.198333 35.755555 224.195133 
 127.197222 35.755667 198.749807 
 127.197333 35.755667 191.452135 
 127.197444 35.755667 188.985053 
 127.197556 35.755667 190.248122 
 127.197778 35.755667 200.676951 
 127.198000 35.755667 212.234568 
 127.198111 35.755667 216.752380 
 127.198222 35.755667 220.999446 
 127.198333 35.755667 224.560209 
 127.197333 35.755667 191.452135 
 127.197444 35.755667 188.985053 
 127.197556 35.755667 190.248122 
 127.197667 35.755667 197.478137 
 127.197889 35.755667 203.488485 
 127.198111 35.755667 216.752380 
 127.198222 35.755667 220.999446 
 127.198333 35.755667 224.560209 
 127.198444 35.755667 226.109529 
 127.197333 35.755778 189.853750 
 127.197444 35.755778 188.636774 
 127.197556 35.755778 190.480865 
 127.197667 35.755778 197.203944 
 127.197889 35.755778 203.593151 
 127.198111 35.755778 214.630380 
 127.198222 35.755778 220.482446 
 127.198333 35.755778 224.778083 
 127.198444 35.755778 226.853519 
 127.197333 35.755889 188.994472 
 127.197444 35.755889 188.506113 
 127.197556 35.755889 190.649026 
 127.197667 35.755889 196.075454 
 127.197889 35.755889 203.574615 
 127.198111 35.755889 213.488348 
 127.198222 35.755889 220.153548 
 127.198333 35.755889 225.000033 
 127.198444 35.755889 228.074192 
 127.197444 35.755889 188.506113 
 127.197556 35.755889 190.649026 
 127.197667 35.755889 196.075454 
 127.197778 35.755889 199.586289 
 127.198000 35.755889 209.981034 
 127.198222 35.755889 220.153548 
 127.198333 35.755889 225.000033 
 127.198444 35.755889 228.074192 
 127.198556 35.755889 235.301606 
 127.197444 35.756000 188.512649 
 127.197556 35.756000 190.540190 
 127.197667 35.756000 194.169538 
 127.197778 35.756000 197.862547 
 127.198000 35.756000 209.604286 
 127.198222 35.756000 220.014727 
 127.198333 35.756000 225.358975 
 127.198444 35.756000 229.935553 
 127.198556 35.756000 237.692922 
 127.197444 35.756111 188.631590 
 127.197556 35.756111 190.212474 
 127.197667 35.756111 192.288443 
 127.197778 35.756111 195.620443 
 127.198000 35.756111 208.800742 
 127.198222 35.756111 219.975683 
 127.198333 35.756111 225.949186 
 127.198444 35.756111 232.371121 
 127.198556 35.756111 239.426609 
 127.197556 35.756111 190.212474 
 127.197667 35.756111 192.288443 
 127.197778 35.756111 195.620443 
 127.197889 35.756111 201.842977 
 127.198111 35.756111 212.736115 
 127.198333 35.756111 225.949186 
 127.198444 35.756111 232.371121 
 127.198556 35.756111 239.426609 
 127.198667 35.756111 241.635827 
 127.197556 35.756222 189.905573 
 127.197667 35.756222 191.064211 
 127.197778 35.756222 193.856472 
 127.197889 35.756222 199.893939 
 127.198111 35.756222 212.321364 
 127.198333 35.756222 226.719316 
 127.198444 35.756222 234.947223 
 127.198556 35.756222 240.477775 
 127.198667 35.756222 241.863613 
 127.197556 35.756333 189.735737 
 127.197667 35.756333 190.557082 
 127.197778 35.756333 193.404509 
 127.197889 35.756333 198.574235 
 127.198111 35.756333 211.669420 
 127.198333 35.756333 227.092510 
 127.198444 35.756333 236.930344 
 127.198556 35.756333 240.917226 
 127.198667 35.756333 242.024341 
 127.197667 35.756333 190.557082 
 127.197778 35.756333 193.404509 
 127.197889 35.756333 198.574235 
 127.198000 35.756333 204.223900 
 127.198222 35.756333 219.007280 
 127.198444 35.756333 236.930344 
 127.198556 35.756333 240.917226 
 127.198667 35.756333 242.024341 
 127.198778 35.756333 245.267446 
 127.197667 35.756444 190.651281 
 127.197778 35.756444 194.213245 
 127.197889 35.756444 198.340594 
 127.198000 35.756444 202.900571 
 127.198222 35.756444 217.698668 
 127.198444 35.756444 237.645931 
 127.198556 35.756444 240.735444 
 127.198667 35.756444 242.148743 
 127.198778 35.756444 248.064429 
 127.197667 35.756555 191.356380 
 127.197778 35.756555 195.578788 
 127.197889 35.756555 198.618243 
 127.198000 35.756555 203.117718 
 127.198222 35.756555 216.850487 
 127.198444 35.756555 236.890474 
 127.198556 35.756555 239.893593 
 127.198667 35.756555 242.214285 
 127.198778 35.756555 251.018335 
 127.197778 35.756555 195.578788 
 127.197889 35.756555 198.618243 
 127.198000 35.756555 203.117718 
 127.198111 35.756555 212.046785 
 127.198333 35.756555 223.534918 
 127.198556 35.756555 239.893593 
 127.198667 35.756555 242.214285 
 127.198778 35.756555 251.018335 
 127.198889 35.756555 258.006094 
 127.197778 35.756667 196.795608 
 127.197889 35.756667 199.074081 
 127.198000 35.756667 204.195196 
 127.198111 35.756667 212.978294 
 127.198333 35.756667 221.565360 
 127.198556 35.756667 238.699258 
 127.198667 35.756667 242.203105 
 127.198778 35.756667 253.078748 
 127.198889 35.756667 258.559467 
 127.197778 35.756778 197.619123 
 127.197889 35.756778 199.696464 
 127.198000 35.756778 205.805413 
 127.198111 35.756778 213.883578 
 127.198333 35.756778 220.433527 
 127.198556 35.756778 237.738382 
 127.198667 35.756778 242.182327 
 127.198778 35.756778 254.148027 
 127.198889 35.756778 258.770952 
 127.197889 35.756778 199.696464 
 127.198000 35.756778 205.805413 
 127.198111 35.756778 213.883578 
 127.198222 35.756778 216.390031 
 127.198444 35.756778 234.157132 
 127.198667 35.756778 242.182327 
 127.198778 35.756778 254.148027 
 127.198889 35.756778 258.770952 
 127.199000 35.756778 259.143056 
 127.197889 35.756889 200.610249 
 127.198000 35.756889 207.818866 
 127.198111 35.756889 214.530457 
 127.198222 35.756889 216.069458 
 127.198444 35.756889 233.305484 
 127.198667 35.756889 242.234340 
 127.198778 35.756889 254.654756 
 127.198889 35.756889 258.828585 
 127.199000 35.756889 259.016499 
 127.197889 35.757000 202.028942 
 127.198000 35.757000 210.022846 
 127.198111 35.757000 214.714024 
 127.198222 35.757000 215.416376 
 127.198444 35.757000 232.280799 
 127.198667 35.757000 242.342478 
 127.198778 35.757000 254.854044 
 127.198889 35.757000 258.774504 
 127.199000 35.757000 258.755256 
 127.198000 35.757000 210.022846 
 127.198111 35.757000 214.714024 
 127.198222 35.757000 215.416376 
 127.198333 35.757000 218.247179 
 127.198556 35.757000 236.936859 
 127.198778 35.757000 254.854044 
 127.198889 35.757000 258.774504 
 127.199000 35.757000 258.755256 
 127.199111 35.757000 257.911242 
 127.198000 35.757111 211.914943 
 127.198111 35.757111 214.363227 
 127.198222 35.757111 214.508004 
 127.198333 35.757111 216.557216 
 127.198556 35.757111 236.618234 
 127.198778 35.757111 254.522470 
 127.198889 35.757111 258.514701 
 127.199000 35.757111 258.322324 
 127.199111 35.757111 257.484472 
 127.198000 35.757222 212.941198 
 127.198111 35.757222 213.718797 
 127.198222 35.757222 213.682447 
 127.198333 35.757222 215.127823 
 127.198556 35.757222 235.663471 
 127.198778 35.757222 252.538690 
 127.198889 35.757222 257.724807 
 127.199000 35.757222 257.757596 
 127.199111 35.757222 257.135269 
 127.198111 35.757333 213.140438 
 127.198222 35.757333 213.225335 
 127.198333 35.757333 214.634040 
 127.198444 35.757333 221.516613 
 127.198667 35.757333 238.461992 
 127.198889 35.757333 255.714602 
 127.199000 35.757333 257.089291 
 127.199111 35.757333 256.758600 
 127.199222 35.757333 254.686583 
 127.198111 35.757444 212.783910 
 127.198222 35.757444 213.184181 
 127.198333 35.757444 214.929391 
 127.198444 35.757444 219.570414 
 127.198667 35.757444 236.181122 
 127.198889 35.757444 251.349342 
 127.199000 35.757444 255.989745 
 127.199111 35.757444 256.122717 
 127.199222 35.757444 252.098081 
 127.198111 35.757556 212.634452 
 127.198222 35.757556 213.477178 
 127.198333 35.757556 215.453175 
 127.198444 35.757556 218.989008 
 127.198667 35.757556 234.938722 
 127.198889 35.757556 243.075511 
 127.199000 35.757556 253.429338 
 127.199111 35.757556 254.816760 
 127.199222 35.757556 247.591865 
 127.198222 35.757556 213.477178 
 127.198333 35.757556 215.453175 
 127.198444 35.757556 218.989008 
 127.198556 35.757556 230.723437 
 127.198778 35.757556 234.988837 
 127.199000 35.757556 253.429338 
 127.199111 35.757556 254.816760 
 127.199222 35.757556 247.591865 
 127.199333 35.757556 230.129290 
 127.198222 35.757667 213.965734 
 127.198333 35.757667 215.800743 
 127.198444 35.757667 217.817273 
 127.198556 35.757667 228.470119 
 127.198778 35.757667 229.201095 
 127.199000 35.757667 247.487217 
 127.199111 35.757667 252.117262 
 127.199222 35.757667 240.941881 
 127.199333 35.757667 223.141323 
 127.198222 35.757778 214.492686 
 127.198333 35.757778 215.584540 
 127.198444 35.757778 213.285901 
 127.198556 35.757778 221.566911 
 127.198778 35.757778 221.853678 
 127.199000 35.757778 236.369301 
 127.199111 35.757778 246.888518 
 127.199222 35.757778 232.974095 
 127.199333 35.757778 218.381122 
 127.198333 35.757778 215.584540 
 127.198444 35.757778 213.285901 
 127.198556 35.757778 221.566911 
 127.198667 35.757778 231.312237 
 127.198889 35.757778 215.864951 
 127.199111 35.757778 246.888518 
 127.199222 35.757778 232.974095 
 127.199333 35.757778 218.381122 
 127.199444 35.757778 213.365501 
 127.198333 35.757889 213.894905 
 127.198444 35.757889 203.491331 
 127.198556 35.757889 209.030007 
 127.198667 35.757889 225.806504 
 127.198889 35.757889 204.618056 
 127.199111 35.757889 237.845756 
 127.199222 35.757889 225.249260 
 127.199333 35.757889 215.469436 
 127.199444 35.757889 212.076695 
 127.198333 35.758000 209.290815 
 127.198444 35.758000 193.260343 
 127.198556 35.758000 196.746092 
 127.198667 35.758000 214.157587 
 127.198889 35.758000 197.632918 
 127.199111 35.758000 224.039479 
 127.199222 35.758000 218.408822 
 127.199333 35.758000 213.548053 
 127.199444 35.758000 210.390664 
 127.198444 35.758000 193.260343 
 127.198556 35.758000 196.746092 
 127.198667 35.758000 214.157587 
 127.198778 35.758000 204.314740 
 127.199000 35.758000 207.865102 
 127.199222 35.758000 218.408822 
 127.199333 35.758000 213.548053 
 127.199444 35.758000 210.390664 
 127.199556 35.758000 202.981410 
 127.198444 35.758111 187.180228 
 127.198556 35.758111 188.033315 
 127.198667 35.758111 195.379164 
 127.198778 35.758111 195.410158 
 127.199000 35.758111 197.195847 
 127.199222 35.758111 211.376934 
 127.199333 35.758111 211.719224 
 127.199444 35.758111 207.692683 
 127.199556 35.758111 198.397416 
 127.198444 35.758222 184.023187 
 127.198556 35.758222 180.777005 
 127.198667 35.758222 179.277498 
 127.198778 35.758222 185.373806 
 127.199000 35.758222 188.221233 
 127.199222 35.758222 202.116626 
 127.199333 35.758222 208.878280 
 127.199444 35.758222 203.691344 
 127.199556 35.758222 194.742007 
 127.198556 35.758222 180.777005 
 127.198667 35.758222 179.277498 
 127.198778 35.758222 185.373806 
 127.198889 35.758222 187.557411 
 127.199111 35.758222 189.359072 
 127.199333 35.758222 208.878280 
 127.199444 35.758222 203.691344 
 127.199556 35.758222 194.742007 
 127.199667 35.758222 191.099353 
 127.198556 35.758333 174.413820 
 127.198667 35.758333 172.111571 
 127.198778 35.758333 176.013411 
 127.198889 35.758333 179.675824 
 127.199111 35.758333 178.829698 
 127.199333 35.758333 203.521442 
 127.199444 35.758333 198.894595 
 127.199556 35.758333 192.433214 
 127.199667 35.758333 190.484646 
 127.198556 35.758444 170.680960 
 127.198667 35.758444 169.601057 
 127.198778 35.758444 170.178819 
 127.198889 35.758444 172.298953 
 127.199111 35.758444 174.042606 
 127.199333 35.758444 194.228360 
 127.199444 35.758444 194.067933 
 127.199556 35.758444 191.058471 
 127.199667 35.758444 190.054982 
 127.198667 35.758444 169.601057 
 127.198778 35.758444 170.178819 
 127.198889 35.758444 172.298953 
 127.199000 35.758444 174.402558 
 127.199222 35.758444 180.700538 
 127.199444 35.758444 194.067933 
 127.199556 35.758444 191.058471 
 127.199667 35.758444 190.054982 
 127.199778 35.758444 189.086601 
 127.198667 35.758556 168.546718 
 127.198778 35.758556 167.258022 
 127.198889 35.758556 167.496244 
 127.199000 35.758556 170.606839 
 127.199222 35.758556 174.139413 
 127.199444 35.758556 188.998375 
 127.199556 35.758556 189.976821 
 127.199667 35.758556 189.548194 
 127.199778 35.758556 188.515457 
 127.198667 35.758667 167.803528 
 127.198778 35.758667 165.282783 
 127.198889 35.758667 163.201038 
 127.199000 35.758667 166.813534 
 127.199222 35.758667 169.927065 
 127.199444 35.758667 182.392617 
 127.199556 35.758667 188.352336 
 127.199667 35.758667 188.687976 
 127.199778 35.758667 187.933554 
 127.198778 35.758667 165.282783 
 127.198889 35.758667 163.201038 
 127.199000 35.758667 166.813534 
 127.199111 35.758667 170.609625 
 127.199333 35.758667 171.360240 
 127.199556 35.758667 188.352336 
 127.199667 35.758667 188.687976 
 127.199778 35.758667 187.933554 
 127.199889 35.758667 187.299244 
 127.198778 35.758778 162.410610 
 127.198889 35.758778 158.449131 
 127.199000 35.758778 162.147862 
 127.199111 35.758778 168.339033 
 127.199333 35.758778 165.013739 
 127.199556 35.758778 184.755417 
 127.199667 35.758778 187.077419 
 127.199778 35.758778 187.272125 
 127.199889 35.758778 186.572072 
 127.198778 35.758889 158.208343 
 127.198889 35.758889 155.157063 
 127.199000 35.758889 157.560300 
 127.199111 35.758889 163.235805 
 127.199333 35.758889 161.934454 
 127.199556 35.758889 177.291092 
 127.199667 35.758889 184.071576 
 127.199778 35.758889 186.263040 
 127.199889 35.758889 185.157811 
 127.198889 35.758889 155.157063 
 127.199000 35.758889 157.560300 
 127.199111 35.758889 163.235805 
 127.199222 35.758889 163.277217 
 127.199444 35.758889 166.014666 
 127.199667 35.758889 184.071576 
 127.199778 35.758889 186.263040 
 127.199889 35.758889 185.157811 
 127.200000 35.758889 179.343220 
 127.198889 35.759000 153.498430 
 127.199000 35.759000 153.150699 
 127.199111 35.759000 155.350389 
 127.199222 35.759000 160.108654 
 127.199444 35.759000 160.200983 
 127.199667 35.759000 178.626396 
 127.199778 35.759000 184.357100 
 127.199889 35.759000 182.612984 
 127.200000 35.759000 175.207401 
 127.198889 35.759111 152.188392 
 127.199000 35.759111 148.727199 
 127.199111 35.759111 149.119100 
 127.199222 35.759111 156.637331 
 127.199444 35.759111 155.598246 
 127.199667 35.759111 169.916997 
 127.199778 35.759111 180.676972 
 127.199889 35.759111 178.838666 
 127.200000 35.759111 171.778905 
 127.199000 35.759111 148.727199 
 127.199111 35.759111 149.119100 
 127.199222 35.759111 156.637331 
 127.199333 35.759111 158.138542 
 127.199556 35.759111 155.106118 
 127.199778 35.759111 180.676972 
 127.199889 35.759111 178.838666 
 127.200000 35.759111 171.778905 
 127.200111 35.759111 167.326778 
 127.199000 35.759222 145.502318 
 127.199111 35.759222 145.929540 
 127.199222 35.759222 152.032798 
 127.199333 35.759222 154.122314 
 127.199556 35.759222 147.548964 
 127.199778 35.759222 174.314205 
 127.199889 35.759222 174.492918 
 127.200000 35.759222 169.405614 
 127.200111 35.759222 165.577954 
 127.199000 35.759333 143.959832 
 127.199111 35.759333 144.053968 
 127.199222 35.759333 145.594826 
 127.199333 35.759333 147.183809 
 127.199556 35.759333 143.344495 
 127.199778 35.759333 165.572260 
 127.199889 35.759333 170.555175 
 127.200000 35.759333 167.700933 
 127.200111 35.759333 163.564600 
 127.199111 35.759333 144.053968 
 127.199222 35.759333 145.594826 
 127.199333 35.759333 147.183809 
 127.199444 35.759333 145.836366 
 127.199667 35.759333 149.852017 
 127.199889 35.759333 170.555175 
 127.200000 35.759333 167.700933 
 127.200111 35.759333 163.564600 
 127.200222 35.759333 157.745594 
 127.199111 35.759444 141.857898 
 127.199222 35.759444 138.765754 
 127.199333 35.759444 139.934047 
 127.199444 35.759444 141.636831 
 127.199667 35.759444 144.085387 
 127.199889 35.759444 167.244392 
 127.200000 35.759444 166.093701 
 127.200111 35.759444 161.224695 
 127.200222 35.759444 155.798729 
 127.199111 35.759556 138.312893 
 127.199222 35.759556 134.233116 
 127.199333 35.759556 135.437940 
 127.199444 35.759556 138.697237 
 127.199667 35.759556 140.734143 
 127.199889 35.759556 163.632736 
 127.200000 35.759556 164.068945 
 127.200111 35.759556 158.777966 
 127.200222 35.759556 154.008102 
 127.199222 35.759556 134.233116 
 127.199333 35.759556 135.437940 
 127.199444 35.759556 138.697237 
 127.199556 35.759556 139.420476 
 127.199778 35.759556 148.712706 
 127.200000 35.759556 164.068945 
 127.200111 35.759556 158.777966 
 127.200222 35.759556 154.008102 
 127.200333 35.759556 149.243857 
 127.199222 35.759667 132.194182 
 127.199333 35.759667 133.387446 
 127.199444 35.759667 136.284628 
 127.199556 35.759667 136.895586 
 127.199778 35.759667 141.621371 
 127.200000 35.759667 161.175686 
 127.200111 35.759667 156.489779 
 127.200222 35.759667 152.060799 
 127.200333 35.759667 146.271161 
 127.199222 35.759778 131.443097 
 127.199333 35.759778 132.395354 
 127.199444 35.759778 133.175593 
 127.199556 35.759778 132.685481 
 127.199778 35.759778 134.389572 
 127.200000 35.759778 156.766803 
 127.200111 35.759778 154.321656 
 127.200222 35.759778 149.628724 
 127.200333 35.759778 143.149821 
 127.199333 35.759778 132.395354 
 127.199444 35.759778 133.175593 
 127.199556 35.759778 132.685481 
 127.199667 35.759778 133.492349 
 127.199889 35.759778 146.112638 
 127.200111 35.759778 154.321656 
 127.200222 35.759778 149.628724 
 127.200333 35.759778 143.149821 
 127.200444 35.759778 137.701443 
 127.199333 35.759889 131.409905 
 127.199444 35.759889 128.995965 
 127.199556 35.759889 127.757315 
 127.199667 35.759889 128.627823 
 127.199889 35.759889 132.977121 
 127.200111 35.759889 151.858814 
 127.200222 35.759889 146.654093 
 127.200333 35.759889 140.441106 
 127.200444 35.759889 135.965398 
 127.199333 35.760000 129.540868 
 127.199444 35.760000 124.963768 
 127.199556 35.760000 123.937920 
 127.199667 35.760000 124.817319 
 127.199889 35.760000 125.303215 
 127.200111 35.760000 148.316438 
 127.200222 35.760000 143.454755 
 127.200333 35.760000 138.373126 
 127.200444 35.760000 134.380789 
 127.199444 35.760000 124.963768 
 127.199556 35.760000 123.937920 
 127.199667 35.760000 124.817319 
 127.199778 35.760000 124.502873 
 127.200000 35.760000 139.047151 
 127.200222 35.760000 143.454755 
 127.200333 35.760000 138.373126 
 127.200444 35.760000 134.380789 
 127.200556 35.760000 129.604074 
 127.199444 35.760111 122.245386 
 127.199556 35.760111 121.750159 
 127.199667 35.760111 122.690281 
 127.199778 35.760111 122.711915 
 127.200000 35.760111 128.507796 
 127.200222 35.760111 140.458003 
 127.200333 35.760111 136.756496 
 127.200444 35.760111 132.749000 
 127.200556 35.760111 128.586156 
 127.199444 35.760222 120.785727 
 127.199556 35.760222 120.733215 
 127.199667 35.760222 121.762851 
 127.199778 35.760222 121.825170 
 127.200000 35.760222 122.238232 
 127.200222 35.760222 137.506259 
 127.200333 35.760222 135.037424 
 127.200444 35.760222 131.000788 
 127.200556 35.760222 127.859206 
 127.199556 35.760222 120.733215 
 127.199667 35.760222 121.762851 
 127.199778 35.760222 121.825170 
 127.199889 35.760222 120.968898 
 127.200111 35.760222 134.477769 
 127.200333 35.760222 135.037424 
 127.200444 35.760222 131.000788 
 127.200556 35.760222 127.859206 
 127.200667 35.760222 126.981502 
 127.199556 35.760333 120.416765 
 127.199667 35.760333 121.423801 
 127.199778 35.760333 121.206519 
 127.199889 35.760333 120.071266 
 127.200111 35.760333 125.757712 
 127.200333 35.760333 132.125044 
 127.200444 35.760333 129.058470 
 127.200556 35.760333 127.289655 
 127.200667 35.760333 126.739913 
 127.199556 35.760444 120.520972 
 127.199667 35.760444 121.238208 
 127.199778 35.760444 120.583238 
 127.199889 35.760444 119.279591 
 127.200111 35.760444 119.844503 
 127.200333 35.760444 126.505209 
 127.200444 35.760444 126.633507 
 127.200556 35.760444 126.685810 
 127.200667 35.760444 126.378844 
 127.199667 35.760556 120.943452 
 127.199778 35.760556 119.883563 
 127.199889 35.760556 118.574133 
 127.200000 35.760556 117.656756 
 127.200222 35.760556 117.071443 
 127.200444 35.760556 123.243160 
 127.200556 35.760556 125.790299 
 127.200667 35.760556 125.861888 
 127.200778 35.760556 125.207071 
 127.199667 35.760667 120.448382 
 127.199778 35.760667 119.154662 
 127.199889 35.760667 118.011270 
 127.200000 35.760667 117.345475 
 127.200222 35.760667 112.993083 
 127.200444 35.760667 119.104305 
 127.200556 35.760667 124.428966 
 127.200667 35.760667 125.298326 
 127.200778 35.760667 124.949257 
 127.199667 35.760778 119.792630 
 127.199778 35.760778 118.484823 
 127.199889 35.760778 117.636699 
 127.200000 35.760778 117.260438 
 127.200222 35.760778 111.856279 
 127.200444 35.760778 115.607581 
 127.200556 35.760778 122.857933 
 127.200667 35.760778 124.842118 
 127.200778 35.760778 124.728219 
 127.199778 35.760778 118.484823 
 127.199889 35.760778 117.636699 
 127.200000 35.760778 117.260438 
 127.200111 35.760778 115.738154 
 127.200333 35.760778 111.682575 
 127.200556 35.760778 122.857933 
 127.200667 35.760778 124.842118 
 127.200778 35.760778 124.728219 
 127.200889 35.760778 123.779498 
 127.199778 35.760889 117.958412 
 127.199889 35.760889 117.467667 
 127.200000 35.760889 117.333269 
 127.200111 35.760889 115.891016 
 127.200333 35.760889 111.015231 
 127.200556 35.760889 121.599546 
 127.200667 35.760889 124.455538 
 127.200778 35.760889 124.393233 
 127.200889 35.760889 122.516600 
 127.199778 35.761000 117.618016 
 127.199889 35.761000 117.465100 
 127.200000 35.761000 117.459697 
 127.200111 35.761000 116.153511 
 127.200333 35.761000 110.946340 
 127.200556 35.761000 120.585949 
 127.200667 35.761000 123.833010 
 127.200778 35.761000 123.691096 
 127.200889 35.761000 120.486312 
 127.199889 35.761000 117.465100 
 127.200000 35.761000 117.459697 
 127.200111 35.761000 116.153511 
 127.200222 35.761000 112.172962 
 127.200444 35.761000 112.781398 
 127.200667 35.761000 123.833010 
 127.200778 35.761000 123.691096 
 127.200889 35.761000 120.486312 
 127.201000 35.761000 115.172354 
 127.199889 35.761111 117.545116 
 127.200000 35.761111 117.556577 
 127.200111 35.761111 116.344302 
 127.200222 35.761111 112.937323 
 127.200444 35.761111 112.389597 
 127.200667 35.761111 122.322259 
 127.200778 35.761111 122.202802 
 127.200889 35.761111 117.971613 
 127.201000 35.761111 113.670242 
 127.199889 35.761222 117.632947 
 127.200000 35.761222 117.582798 
 127.200111 35.761222 116.359232 
 127.200222 35.761222 113.928341 
 127.200444 35.761222 112.041749 
 127.200667 35.761222 118.923227 
 127.200778 35.761222 119.433321 
 127.200889 35.761222 115.592892 
 127.201000 35.761222 112.821241 
 127.200000 35.761222 117.582798 
 127.200111 35.761222 116.359232 
 127.200222 35.761222 113.928341 
 127.200333 35.761222 112.219826 
 127.200556 35.761222 115.817509 
 127.200778 35.761222 119.433321 
 127.200889 35.761222 115.592892 
 127.201000 35.761222 112.821241 
 127.201111 35.761222 111.943520 
 127.200000 35.761333 117.507151 
 127.200111 35.761333 116.193956 
 127.200222 35.761333 114.761324 
 127.200333 35.761333 113.530885 
 127.200556 35.761333 111.273798 
 127.200778 35.761333 115.355844 
 127.200889 35.761333 113.716253 
 127.201000 35.761333 112.317727 
 127.201111 35.761333 111.521486 
 127.200000 35.761444 117.292549 
 127.200111 35.761444 115.966293 
 127.200222 35.761444 115.264173 
 127.200333 35.761444 114.708502 
 127.200556 35.761444 107.927733 
 127.200778 35.761444 111.020729 
 127.200889 35.761444 112.255773 
 127.201000 35.761444 111.894110 
 127.201111 35.761444 110.896488 
 127.200111 35.761444 115.966293 
 127.200222 35.761444 115.264173 
 127.200333 35.761444 114.708502 
 127.200444 35.761444 111.861606 
 127.200667 35.761444 108.500173 
 127.200889 35.761444 112.255773 
 127.201000 35.761444 111.894110 
 127.201111 35.761444 110.896488 
 127.201222 35.761444 109.317709 
 127.200111 35.761556 115.801796 
 127.200222 35.761556 115.578257 
 127.200333 35.761556 115.542454 
 127.200444 35.761556 112.600809 
 127.200667 35.761556 105.693217 
 127.200889 35.761556 110.842798 
 127.201000 35.761556 111.244987 
 127.201111 35.761556 110.064910 
 127.201222 35.761556 108.913541 
 127.200111 35.761667 115.746893 
 127.200222 35.761667 115.878023 
 127.200333 35.761667 116.134411 
 127.200444 35.761667 113.462487 
 127.200667 35.761667 104.716190 
 127.200889 35.761667 109.056108 
 127.201000 35.761667 109.915028 
 127.201111 35.761667 109.128448 
 127.201222 35.761667 108.616755 
 127.200222 35.761667 115.878023 
 127.200333 35.761667 116.134411 
 127.200444 35.761667 113.462487 
 127.200556 35.761667 106.994511 
 127.200778 35.761667 105.753702 
 127.201000 35.761667 109.915028 
 127.201111 35.761667 109.128448 
 127.201222 35.761667 108.616755 
 127.201333 35.761667 108.189730 
 127.200222 35.761778 116.263187 
 127.200333 35.761778 116.550717 
 127.200444 35.761778 114.184460 
 127.200556 35.761778 107.760338 
 127.200778 35.761778 105.061084 
 127.201000 35.761778 107.633191 
 127.201111 35.761778 108.094729 
 127.201222 35.761778 108.263734 
 127.201333 35.761778 107.588051 
 127.200222 35.761889 116.696818 
 127.200333 35.761889 116.809165 
 127.200444 35.761889 114.707865 
 127.200556 35.761889 108.841478 
 127.200778 35.761889 105.525449 
 127.201000 35.761889 105.303120 
 127.201111 35.761889 106.864057 
 127.201222 35.761889 107.665493 
 127.201333 35.761889 106.654054 
 127.200333 35.761889 116.809165 
 127.200444 35.761889 114.707865 
 127.200556 35.761889 108.841478 
 127.200667 35.761889 105.954287 
 127.200889 35.761889 105.107955 
 127.201111 35.761889 106.864057 
 127.201222 35.761889 107.665493 
 127.201333 35.761889 106.654054 
 127.201444 35.761889 105.139575 
 127.200333 35.762000 116.943251 
 127.200444 35.762000 115.041346 
 127.200556 35.762000 110.242413 
 127.200667 35.762000 108.138339 
 127.200889 35.762000 104.469062 
 127.201111 35.762000 105.499964 
 127.201222 35.762000 106.701293 
 127.201333 35.762000 105.680892 
 127.201444 35.762000 104.661519 
 127.200333 35.762111 116.982532 
 127.200444 35.762111 115.197125 
 127.200556 35.762111 111.876686 
 127.200667 35.762111 110.797124 
 127.200889 35.762111 104.565712 
 127.201111 35.762111 104.364250 
 127.201222 35.762111 105.587961 
 127.201333 35.762111 105.018276 
 127.201444 35.762111 104.347160 
 127.200444 35.762111 115.197125 
 127.200556 35.762111 111.876686 
 127.200667 35.762111 110.797124 
 127.200778 35.762111 108.930083 
 127.201000 35.762111 103.494263 
 127.201222 35.762111 105.587961 
 127.201333 35.762111 105.018276 
 127.201444 35.762111 104.347160 
 127.201556 35.762111 103.053576 
 127.200444 35.762222 115.182573 
 127.200556 35.762222 113.296994 
 127.200667 35.762222 112.808460 
 127.200778 35.762222 110.549100 
 127.201000 35.762222 103.440797 
 127.201222 35.762222 104.756601 
 127.201333 35.762222 104.662042 
 127.201444 35.762222 104.049839 
 127.201556 35.762222 102.690550 
 127.200444 35.762333 115.055607 
 127.200556 35.762333 114.164213 
 127.200667 35.762333 113.874955 
 127.200778 35.762333 111.648425 
 127.201000 35.762333 103.737795 
 127.201222 35.762333 104.267007 
 127.201333 35.762333 104.420718 
 127.201444 35.762333 103.687176 
 127.201556 35.762333 102.392812 
 127.200556 35.762333 114.164213 
 127.200667 35.762333 113.874955 
 127.200778 35.762333 111.648425 
 127.200889 35.762333 105.901421 
 127.201111 35.762333 103.530676 
 127.201333 35.762333 104.420718 
 127.201444 35.762333 103.687176 
 127.201556 35.762333 102.392812 
 127.201667 35.762333 101.925193 
 127.200556 35.762444 114.570115 
 127.200667 35.762444 114.319937 
 127.200778 35.762444 112.266822 
 127.200889 35.762444 107.299262 
 127.201111 35.762444 103.670153 
 127.201333 35.762444 104.134461 
 127.201444 35.762444 103.253552 
 127.201556 35.762444 102.172095 
 127.201667 35.762444 101.838643 
 127.200556 35.762556 114.731805 
 127.200667 35.762556 114.423786 
 127.200778 35.762556 112.438048 
 127.200889 35.762556 109.001044 
 127.201111 35.762556 104.031091 
 127.201333 35.762556 103.752901 
 127.201444 35.762556 102.795989 
 127.201556 35.762556 101.998573 
 127.201667 35.762556 101.699729 
 127.200667 35.762556 114.423786 
 127.200778 35.762556 112.438048 
 127.200889 35.762556 109.001044 
 127.201000 35.762556 106.284881 
 127.201222 35.762556 103.671944 
 127.201444 35.762556 102.795989 
 127.201556 35.762556 101.998573 
 127.201667 35.762556 101.699729 
 127.201778 35.762556 101.090564 
 127.200667 35.762667 114.278578 
 127.200778 35.762667 112.237684 
 127.200889 35.762667 110.248747 
 127.201000 35.762667 107.994647 
 127.201222 35.762667 103.539119 
 127.201444 35.762667 102.315678 
 127.201556 35.762667 101.794319 
 127.201667 35.762667 101.455727 
 127.201778 35.762667 100.705357 
 127.200667 35.762778 113.881368 
 127.200778 35.762778 111.893153 
 127.200889 35.762778 110.778607 
 127.201000 35.762778 108.827062 
 127.201222 35.762778 103.490234 
 127.201444 35.762778 101.685851 
 127.201556 35.762778 101.426962 
 127.201667 35.762778 101.081386 
 127.201778 35.762778 100.386401 
 127.200778 35.762778 111.893153 
 127.200889 35.762778 110.778607 
 127.201000 35.762778 108.827062 
 127.201111 35.762778 104.589046 
 127.201333 35.762778 103.045794 
 127.201556 35.762778 101.426962 
 127.201667 35.762778 101.081386 
 127.201778 35.762778 100.386401 
 127.201889 35.762778 100.047417 
 127.200778 35.762889 111.592256 
 127.200889 35.762889 110.797843 
 127.201000 35.762889 108.645959 
 127.201111 35.762889 104.642106 
 127.201333 35.762889 102.626250 
 127.201556 35.762889 100.849932 
 127.201667 35.762889 100.652375 
 127.201778 35.762889 100.177419 
 127.201889 35.762889 99.936145 
 127.200778 35.763000 111.348660 
 127.200889 35.763000 110.389653 
 127.201000 35.763000 107.667279 
 127.201111 35.763000 104.553517 
 127.201333 35.763000 102.052145 
 127.201556 35.763000 100.313084 
 127.201667 35.763000 100.306341 
 127.201778 35.763000 100.044349 
 127.201889 35.763000 99.771341 
 127.200889 35.763000 110.389653 
 127.201000 35.763000 107.667279 
 127.201111 35.763000 104.553517 
 127.201222 35.763000 103.427154 
 127.201444 35.763000 100.375729 
 127.201667 35.763000 100.306341 
 127.201778 35.763000 100.044349 
 127.201889 35.763000 99.771341 
 127.202000 35.763000 99.180220 
 127.200889 35.763111 109.465517 
 127.201000 35.763111 106.370860 
 127.201111 35.763111 104.336239 
 127.201222 35.763111 103.236531 
 127.201444 35.763111 100.062967 
 127.201667 35.763111 100.076006 
 127.201778 35.763111 99.924667 
 127.201889 35.763111 99.497487 
 127.202000 35.763111 98.718425 
 127.200889 35.763222 108.062381 
 127.201000 35.763222 105.316408 
 127.201111 35.763222 103.992811 
 127.201222 35.763222 102.657454 
 127.201444 35.763222 99.865886 
 127.201667 35.763222 99.873838 
 127.201778 35.763222 99.755008 
 127.201889 35.763222 99.106630 
 127.202000 35.763222 98.314714 
 127.200889 35.763333 106.581940 
 127.201000 35.763333 104.644406 
 127.201111 35.763333 103.469117 
 127.201222 35.763333 101.761752 
 127.201444 35.763333 99.636372 
 127.201667 35.763333 99.560763 
 127.201778 35.763333 99.475777 
 127.201889 35.763333 98.674602 
 127.202000 35.763333 98.017447 
 127.201000 35.763333 104.644406 
 127.201111 35.763333 103.469117 
 127.201222 35.763333 101.761752 
 127.201333 35.763333 100.360672 
 127.201556 35.763333 99.435695 
 127.201778 35.763333 99.475777 
 127.201889 35.763333 98.674602 
 127.202000 35.763333 98.017447 
 127.202111 35.763333 97.411201 
 127.201000 35.763444 104.184107 
 127.201111 35.763444 102.737144 
 127.201222 35.763444 101.002184 
 127.201333 35.763444 100.029296 
 127.201556 35.763444 99.020022 
 127.201778 35.763444 99.051449 
 127.201889 35.763444 98.306069 
 127.202000 35.763444 97.778818 
 127.202111 35.763444 96.935281 
 127.201000 35.763556 103.725212 
 127.201111 35.763556 101.909678 
 127.201222 35.763556 100.516324 
 127.201333 35.763556 99.662140 
 127.201556 35.763556 98.638094 
 127.201778 35.763556 98.445314 
 127.201889 35.763556 98.023384 
 127.202000 35.763556 97.511617 
 127.202111 35.763556 96.322935 
 127.201111 35.763556 101.909678 
 127.201222 35.763556 100.516324 
 127.201333 35.763556 99.662140 
 127.201444 35.763556 98.806657 
 127.201667 35.763556 98.465626 
 127.201889 35.763556 98.023384 
 127.202000 35.763556 97.511617 
 127.202111 35.763556 96.322935 
 127.202222 35.763556 95.043635 
 127.201111 35.763667 101.186981 
 127.201222 35.763667 100.149740 
 127.201333 35.763667 99.015771 
 127.201444 35.763667 98.272092 
 127.201667 35.763667 97.731273 
 127.201889 35.763667 97.745051 
 127.202000 35.763667 97.133161 
 127.202111 35.763667 95.694437 
 127.202222 35.763667 94.768283 
 127.201111 35.763778 100.648891 
 127.201222 35.763778 99.650867 
 127.201333 35.763778 98.003487 
 127.201444 35.763778 97.612231 
 127.201667 35.763778 96.788204 
 127.201889 35.763778 97.279422 
 127.202000 35.763778 96.601437 
 127.202111 35.763778 95.199106 
 127.202222 35.763778 94.659263 
 127.201222 35.763778 99.650867 
 127.201333 35.763778 98.003487 
 127.201444 35.763778 97.612231 
 127.201556 35.763778 97.705548 
 127.201778 35.763778 96.329816 
 127.202000 35.763778 96.601437 
 127.202111 35.763778 95.199106 
 127.202222 35.763778 94.659263 
 127.202333 35.763778 94.649997 
 127.201222 35.763889 98.761121 
 127.201333 35.763889 96.997827 
 127.201444 35.763889 96.917715 
 127.201556 35.763889 96.903233 
 127.201778 35.763889 95.358854 
 127.202000 35.763889 95.968337 
 127.202111 35.763889 94.903769 
 127.202222 35.763889 94.683991 
 127.202333 35.763889 94.816343 
 127.201222 35.764000 97.588764 
 127.201333 35.764000 96.384881 
 127.201444 35.764000 96.375824 
 127.201556 35.764000 96.029146 
 127.201778 35.764000 94.905603 
 127.202000 35.764000 95.419929 
 127.202111 35.764000 94.808048 
 127.202222 35.764000 94.819710 
 127.202333 35.764000 95.014514 
 127.201333 35.764000 96.384881 
 127.201444 35.764000 96.375824 
 127.201556 35.764000 96.029146 
 127.201667 35.764000 95.127032 
 127.201889 35.764000 95.549393 
 127.202111 35.764000 94.808048 
 127.202222 35.764000 94.819710 
 127.202333 35.764000 95.014514 
 127.202444 35.764000 95.111085 
 127.201333 35.764111 96.108925 
 127.201444 35.764111 96.021727 
 127.201556 35.764111 95.329816 
 127.201667 35.764111 94.761519 
 127.201889 35.764111 95.174387 
 127.202111 35.764111 94.877280 
 127.202222 35.764111 95.008655 
 127.202333 35.764111 95.156381 
 127.202444 35.764111 95.118899 
 127.201333 35.764222 95.994045 
 127.201444 35.764222 95.750501 
 127.201556 35.764222 94.870155 
 127.201667 35.764222 94.612181 
 127.201889 35.764222 95.106352 
 127.202111 35.764222 95.025040 
 127.202222 35.764222 95.160157 
 127.202333 35.764222 95.205591 
 127.202444 35.764222 95.100588 
 127.201444 35.764222 95.750501 
 127.201556 35.764222 94.870155 
 127.201667 35.764222 94.612181 
 127.201778 35.764222 94.820177 
 127.202000 35.764222 95.107750 
 127.202222 35.764222 95.160157 
 127.202333 35.764222 95.205591 
 127.202444 35.764222 95.100588 
 127.202556 35.764222 95.065480 
 127.201444 35.764333 95.405114 
 127.201556 35.764333 94.599673 
 127.201667 35.764333 94.562938 
 127.201778 35.764333 94.879487 
 127.202000 35.764333 95.113434 
 127.202222 35.764333 95.213684 
 127.202333 35.764333 95.160987 
 127.202444 35.764333 95.055907 
 127.202556 35.764333 95.035958 
 127.201444 35.764445 94.943601 
 127.201556 35.764445 94.473591 
 127.201667 35.764445 94.539638 
 127.201778 35.764445 94.897070 
 127.202000 35.764445 95.058833 
 127.202222 35.764445 95.127382 
 127.202333 35.764445 94.999311 
 127.202444 35.764445 94.952294 
 127.202556 35.764445 94.969909 
 127.201556 35.764445 94.473591 
 127.201667 35.764445 94.539638 
 127.201778 35.764445 94.897070 
 127.201889 35.764445 95.077240 
 127.202111 35.764445 95.063869 
 127.202333 35.764445 94.999311 
 127.202444 35.764445 94.952294 
 127.202556 35.764445 94.969909 
 127.202667 35.764445 94.814529 
 127.201556 35.764556 94.428717 
 127.201667 35.764556 94.509626 
 127.201778 35.764556 94.788568 
 127.201889 35.764556 94.909124 
 127.202111 35.764556 94.689736 
 127.202333 35.764556 94.723262 
 127.202444 35.764556 94.757922 
 127.202556 35.764556 94.866019 
 127.202667 35.764556 94.684316 
 127.201556 35.764667 94.413237 
 127.201667 35.764667 94.446532 
 127.201778 35.764667 94.374014 
 127.201889 35.764667 94.377521 
 127.202111 35.764667 94.014195 
 127.202333 35.764667 94.457461 
 127.202444 35.764667 94.546299 
 127.202556 35.764667 94.761884 
 127.202667 35.764667 94.495602 
 127.201667 35.764667 94.446532 
 127.201778 35.764667 94.374014 
 127.201889 35.764667 94.377521 
 127.202000 35.764667 94.282815 
 127.202222 35.764667 94.441391 
 127.202444 35.764667 94.546299 
 127.202556 35.764667 94.761884 
 127.202667 35.764667 94.495602 
 127.202778 35.764667 93.111075 
 127.201667 35.764778 94.275893 
 127.201778 35.764778 93.564158 
 127.201889 35.764778 93.492231 
 127.202000 35.764778 93.566320 
 127.202222 35.764778 94.079578 
 127.202444 35.764778 94.405941 
 127.202556 35.764778 94.651134 
 127.202667 35.764778 94.180577 
 127.202778 35.764778 92.421398 
 127.201667 35.764889 93.860425 
 127.201778 35.764889 92.788152 
 127.201889 35.764889 92.784758 
 127.202000 35.764889 93.078465 
 127.202222 35.764889 93.804915 
 127.202444 35.764889 94.259329 
 127.202556 35.764889 94.452525 
 127.202667 35.764889 93.655267 
 127.202778 35.764889 91.735355 
 127.201778 35.764889 92.788152 
 127.201889 35.764889 92.784758 
 127.202000 35.764889 93.078465 
 127.202111 35.764889 93.162463 
 127.202333 35.764889 94.172651 
 127.202556 35.764889 94.452525 
 127.202667 35.764889 93.655267 
 127.202778 35.764889 91.735355 
 127.202889 35.764889 90.694687 
 127.201778 35.765000 92.375414 
 127.201889 35.765000 92.455780 
 127.202000 35.765000 92.862588 
 127.202111 35.765000 93.006203 
 127.202333 35.765000 93.938357 
 127.202556 35.765000 93.981932 
 127.202667 35.765000 92.879792 
 127.202778 35.765000 91.190114 
 127.202889 35.765000 90.565875 
 127.201778 35.765111 92.209138 
 127.201889 35.765111 92.341930 
 127.202000 35.765111 92.761124 
 127.202111 35.765111 92.833684 
 127.202333 35.765111 93.261832 
 127.202556 35.765111 92.839277 
 127.202667 35.765111 91.949732 
 127.202778 35.765111 90.830811 
 127.202889 35.765111 90.431937 
 127.201889 35.765111 92.341930 
 127.202000 35.765111 92.761124 
 127.202111 35.765111 92.833684 
 127.202222 35.765111 93.073849 
 127.202444 35.765111 92.799981 
 127.202667 35.765111 91.949732 
 127.202778 35.765111 90.830811 
 127.202889 35.765111 90.431937 
 127.203000 35.765111 89.889619 
 127.201889 35.765222 92.313586 
 127.202000 35.765222 92.615850 
 127.202111 35.765222 92.476164 
 127.202222 35.765222 92.241296 
 127.202444 35.765222 90.766600 
 127.202667 35.765222 91.084932 
 127.202778 35.765222 90.616975 
 127.202889 35.765222 90.216938 
 127.203000 35.765222 89.394548 
 127.201889 35.765333 92.272087 
 127.202000 35.765333 92.228289 
 127.202111 35.765333 91.804692 
 127.202222 35.765333 91.163001 
 127.202444 35.765333 89.081872 
 127.202667 35.765333 90.455573 
 127.202778 35.765333 90.499648 
 127.202889 35.765333 89.873495 
 127.203000 35.765333 88.963673 
 127.202000 35.765445 91.537754 
 127.202111 35.765445 91.085014 
 127.202222 35.765445 90.455774 
 127.202333 35.765445 89.096641 
 127.202556 35.765445 88.665759 
 127.202778 35.765445 90.526160 
 127.202889 35.765445 89.527155 
 127.203000 35.765445 88.731190 
 127.203111 35.765445 88.618740 
 127.202000 35.765556 90.931875 
 127.202111 35.765556 90.679829 
 127.202222 35.765556 90.232901 
 127.202333 35.765556 89.051187 
 127.202556 35.765556 88.665294 
 127.202778 35.765556 90.772261 
 127.202889 35.765556 89.418657 
 127.203000 35.765556 88.677148 
 127.203111 35.765556 88.767800 
 127.202000 35.765667 90.643373 
 127.202111 35.765667 90.539357 
 127.202222 35.765667 90.339291 
 127.202333 35.765667 89.677182 
 127.202556 35.765667 88.966238 
 127.202778 35.765667 91.091008 
 127.202889 35.765667 89.613272 
 127.203000 35.765667 88.809372 
 127.203111 35.765667 89.182822 
 127.202111 35.765667 90.539357 
 127.202222 35.765667 90.339291 
 127.202333 35.765667 89.677182 
 127.202444 35.765667 88.882895 
 127.202667 35.765667 90.776451 
 127.202889 35.765667 89.613272 
 127.203000 35.765667 88.809372 
 127.203111 35.765667 89.182822 
 127.203222 35.765667 90.236080 
 127.202111 35.765778 90.537886 
 127.202222 35.765778 90.893024 
 127.202333 35.765778 91.326741 
 127.202444 35.765778 90.127399 
 127.202667 35.765778 91.201555 
 127.202889 35.765778 90.102690 
 127.203000 35.765778 89.376612 
 127.203111 35.765778 90.115656 
 127.203222 35.765778 90.724673 
 127.202111 35.765889 90.673479 
 127.202222 35.765889 92.285257 
 127.202333 35.765889 93.968673 
 127.202444 35.765889 92.504072 
 127.202667 35.765889 91.959019 
 127.202889 35.765889 91.162028 
 127.203000 35.765889 91.267797 
 127.203111 35.765889 91.969758 
 127.203222 35.765889 91.345413 
 127.202222 35.765889 92.285257 
 127.202333 35.765889 93.968673 
 127.202444 35.765889 92.504072 
 127.202556 35.765889 91.417691 
 127.202778 35.765889 91.795093 
 127.203000 35.765889 91.267797 
 127.203111 35.765889 91.969758 
 127.203222 35.765889 91.345413 
 127.203333 35.765889 91.241431 
 127.202222 35.766000 94.562840 
 127.202333 35.766000 96.504915 
 127.202444 35.766000 95.522396 
 127.202556 35.766000 95.078985 
 127.202778 35.766000 92.838850 
 127.203000 35.766000 95.814658 
 127.203111 35.766000 95.168018 
 127.203222 35.766000 92.603932 
 127.203333 35.766000 92.704356 
 127.202222 35.766111 96.825944 
 127.202333 35.766111 98.170373 
 127.202444 35.766111 98.324754 
 127.202556 35.766111 100.348088 
 127.202778 35.766111 95.250871 
 127.203000 35.766111 101.328945 
 127.203111 35.766111 99.486863 
 127.203222 35.766111 95.451559 
 127.203333 35.766111 96.685482 
 127.202333 35.766111 98.170373 
 127.202444 35.766111 98.324754 
 127.202556 35.766111 100.348088 
 127.202667 35.766111 97.821946 
 127.202889 35.766111 97.281631 
 127.203111 35.766111 99.486863 
 127.203222 35.766111 95.451559 
 127.203333 35.766111 96.685482 
 127.203444 35.766111 105.778392 
 127.202333 35.766222 99.150677 
 127.202444 35.766222 100.758823 
 127.202556 35.766222 104.664968 
 127.202667 35.766222 102.474357 
 127.202889 35.766222 99.807647 
 127.203111 35.766222 103.404555 
 127.203222 35.766222 100.244081 
 127.203333 35.766222 102.530041 
 127.203444 35.766222 108.001109 
 127.202333 35.766333 99.891950 
 127.202444 35.766333 103.075011 
 127.202556 35.766333 106.900111 
 127.202667 35.766333 105.329840 
 127.202889 35.766333 100.748444 
 127.203111 35.766333 105.698893 
 127.203222 35.766333 104.606746 
 127.203333 35.766333 106.249881 
 127.203444 35.766333 108.403881 
 127.202444 35.766333 103.075011 
 127.202556 35.766333 106.900111 
 127.202667 35.766333 105.329840 
 127.202778 35.766333 100.366495 
 127.203000 35.766333 105.109456 
 127.203222 35.766333 104.606746 
 127.203333 35.766333 106.249881 
 127.203444 35.766333 108.403881 
 127.203556 35.766333 107.922589 
 127.202444 35.766445 105.211971 
 127.202556 35.766445 107.867866 
 127.202667 35.766445 106.883911 
 127.202778 35.766445 102.167505 
 127.203000 35.766445 105.256004 
 127.203222 35.766445 106.654882 
 127.203333 35.766445 107.372585 
 127.203444 35.766445 107.888673 
 127.203556 35.766445 106.192430 
 127.202444 35.766556 106.809748 
 127.202556 35.766556 108.393669 
 127.202667 35.766556 108.685201 
 127.202778 35.766556 105.487804 
 127.203000 35.766556 105.141933 
 127.203222 35.766556 106.982553 
 127.203333 35.766556 107.022042 
 127.203444 35.766556 106.174074 
 127.203556 35.766556 102.856999 
 127.202556 35.766556 108.393669 
 127.202667 35.766556 108.685201 
 127.202778 35.766556 105.487804 
 127.202889 35.766556 102.858606 
 127.203111 35.766556 106.674989 
 127.203333 35.766556 107.022042 
 127.203444 35.766556 106.174074 
 127.203556 35.766556 102.856999 
 127.203667 35.766556 97.182341 
 127.202556 35.766667 109.029891 
 127.202667 35.766667 111.739854 
 127.202778 35.766667 110.866098 
 127.202889 35.766667 105.917336 
 127.203111 35.766667 105.652917 
 127.203333 35.766667 104.874770 
 127.203444 35.766667 102.421176 
 127.203556 35.766667 98.678199 
 127.203667 35.766667 94.947664 
 127.202556 35.766778 110.296598 
 127.202667 35.766778 115.342397 
 127.202778 35.766778 115.374919 
 127.202889 35.766778 108.807748 
 127.203111 35.766778 102.438828 
 127.203333 35.766778 99.569994 
 127.203444 35.766778 97.411044 
 127.203556 35.766778 95.777439 
 127.203667 35.766778 93.753998 
 127.202667 35.766778 115.342397 
 127.202778 35.766778 115.374919 
 127.202889 35.766778 108.807748 
 127.203000 35.766778 102.174554 
 127.203222 35.766778 101.537384 
 127.203444 35.766778 97.411044 
 127.203556 35.766778 95.777439 
 127.203667 35.766778 93.753998 
 127.203778 35.766778 91.106691 
 127.202667 35.766889 117.778364 
 127.202778 35.766889 116.973232 
 127.202889 35.766889 108.560725 
 127.203000 35.766889 99.425822 
 127.203222 35.766889 95.089356 
 127.203444 35.766889 93.821470 
 127.203556 35.766889 94.435582 
 127.203667 35.766889 92.920146 
 127.203778 35.766889 90.623129 
 127.202667 35.767000 118.706264 
 127.202778 35.767000 116.368843 
 127.202889 35.767000 105.845696 
 127.203000 35.767000 97.691633 
 127.203222 35.767000 91.437014 
 127.203444 35.767000 91.972680 
 127.203556 35.767000 93.680371 
 127.203667 35.767000 92.067016 
 127.203778 35.767000 90.158870 
 127.202778 35.767000 116.368843 
 127.202889 35.767000 105.845696 
 127.203000 35.767000 97.691633 
 127.203111 35.767000 95.351028 
 127.203333 35.767000 90.575880 
 127.203556 35.767000 93.680371 
 127.203667 35.767000 92.067016 
 127.203778 35.767000 90.158870 
 127.203889 35.767000 89.792449 
 127.202778 35.767111 114.147861 
 127.202889 35.767111 102.495290 
 127.203000 35.767111 96.663474 
 127.203111 35.767111 94.041124 
 127.203333 35.767111 89.784898 
 127.203556 35.767111 92.769445 
 127.203667 35.767111 90.899416 
 127.203778 35.767111 89.395254 
 127.203889 35.767111 89.122697 
 127.202778 35.767222 110.339062 
 127.202889 35.767222 99.592630 
 127.203000 35.767222 95.662178 
 127.203111 35.767222 92.464494 
 127.203333 35.767222 89.498551 
 127.203556 35.767222 91.038473 
 127.203667 35.767222 88.941104 
 127.203778 35.767222 87.888818 
 127.203889 35.767222 87.578762 
 127.202889 35.767222 99.592630 
 127.203000 35.767222 95.662178 
 127.203111 35.767222 92.464494 
 127.203222 35.767222 89.535727 
 127.203444 35.767222 90.005206 
 127.203667 35.767222 88.941104 
 127.203778 35.767222 87.888818 
 127.203889 35.767222 87.578762 
 127.204000 35.767222 84.118049 
 127.202889 35.767333 97.433051 
 127.203000 35.767333 94.056485 
 127.203111 35.767333 90.022943 
 127.203222 35.767333 88.433750 
 127.203444 35.767333 89.045898 
 127.203667 35.767333 86.289806 
 127.203778 35.767333 85.805763 
 127.203889 35.767333 85.458684 
 127.204000 35.767333 83.307964 
 127.202889 35.767444 95.595203 
 127.203000 35.767444 91.440740 
 127.203111 35.767444 87.320761 
 127.203222 35.767444 86.893235 
 127.203444 35.767444 87.508003 
 127.203667 35.767444 84.259475 
 127.203778 35.767444 84.172079 
 127.203889 35.767444 84.017820 
 127.204000 35.767444 83.136862 
 127.202889 35.767555 93.382927 
 127.203000 35.767555 88.378093 
 127.203111 35.767555 85.369901 
 127.203222 35.767555 85.364365 
 127.203444 35.767555 85.497734 
 127.203667 35.767555 83.360244 
 127.203778 35.767555 83.399193 
 127.203889 35.767555 83.604190 
 127.204000 35.767555 83.216359 
 127.203000 35.767555 88.378093 
 127.203111 35.767555 85.369901 
 127.203222 35.767555 85.364365 
 127.203333 35.767555 86.799604 
 127.203556 35.767555 83.729535 
 127.203778 35.767555 83.399193 
 127.203889 35.767555 83.604190 
 127.204000 35.767555 83.216359 
 127.204111 35.767555 82.831772 
 127.203000 35.767667 85.999412 
 127.203111 35.767667 84.316727 
 127.203222 35.767667 84.219903 
 127.203333 35.767667 84.691438 
 127.203556 35.767667 83.244289 
 127.203778 35.767667 83.197819 
 127.203889 35.767667 83.702597 
 127.204000 35.767667 83.367973 
 127.204111 35.767667 82.651003 
 127.203000 35.767778 84.659102 
 127.203111 35.767778 83.797393 
 127.203222 35.767778 83.453352 
 127.203333 35.767778 83.226901 
 127.203556 35.767778 83.017637 
 127.203778 35.767778 83.346440 
 127.203889 35.767778 83.887539 
 127.204000 35.767778 83.432054 
 127.204111 35.767778 82.119836 
 127.203111 35.767778 83.797393 
 127.203222 35.767778 83.453352 
 127.203333 35.767778 83.226901 
 127.203444 35.767778 83.119622 
 127.203667 35.767778 82.999900 
 127.203889 35.767778 83.887539 
 127.204000 35.767778 83.432054 
 127.204111 35.767778 82.119836 
 127.204222 35.767778 80.927559 
 127.203111 35.767889 83.488483 
 127.203222 35.767889 82.934547 
 127.203333 35.767889 82.589565 
 127.203444 35.767889 82.619373 
 127.203667 35.767889 82.864776 
 127.203889 35.767889 83.997106 
 127.204000 35.767889 83.224831 
 127.204111 35.767889 81.299689 
 127.204222 35.767889 80.552668 
 127.203111 35.768000 83.212223 
 127.203222 35.768000 82.602854 
 127.203333 35.768000 82.324680 
 127.203444 35.768000 82.097828 
 127.203667 35.768000 82.436234 
 127.203889 35.768000 83.977522 
 127.204000 35.768000 82.628637 
 127.204111 35.768000 80.700388 
 127.204222 35.768000 80.499475 
 127.203222 35.768000 82.602854 
 127.203333 35.768000 82.324680 
 127.203444 35.768000 82.097828 
 127.203556 35.768000 82.029148 
 127.203778 35.768000 83.908011 
 127.204000 35.768000 82.628637 
 127.204111 35.768000 80.700388 
 127.204222 35.768000 80.499475 
 127.204333 35.768000 81.035759 
 127.203222 35.768111 82.414472 
 127.203333 35.768111 82.145810 
 127.203444 35.768111 81.408394 
 127.203556 35.768111 80.896872 
 127.203778 35.768111 83.775627 
 127.204000 35.768111 81.834610 
 127.204111 35.768111 80.455359 
 127.204222 35.768111 80.586440 
 127.204333 35.768111 81.232200 
 127.203222 35.768222 82.308771 
 127.203333 35.768222 81.923599 
 127.203444 35.768222 80.638342 
 127.203556 35.768222 79.897361 
 127.203778 35.768222 83.234017 
 127.204000 35.768222 81.134972 
 127.204111 35.768222 80.394554 
 127.204222 35.768222 80.744160 
 127.204333 35.768222 81.389676 
 127.203333 35.768222 81.923599 
 127.203444 35.768222 80.638342 
 127.203556 35.768222 79.897361 
 127.203667 35.768222 80.586572 
 127.203889 35.768222 83.104404 
 127.204111 35.768222 80.394554 
 127.204222 35.768222 80.744160 
 127.204333 35.768222 81.389676 
 127.204444 35.768222 81.634484 
 127.203333 35.768333 81.589400 
 127.203444 35.768333 79.999267 
 127.203556 35.768333 79.411847 
 127.203667 35.768333 79.873373 
 127.203889 35.768333 81.832528 
 127.204111 35.768333 80.389802 
 127.204222 35.768333 80.919272 
 127.204333 35.768333 81.487494 
 127.204444 35.768333 81.660536 
 127.203333 35.768444 81.122988 
 127.203444 35.768444 79.591428 
 127.203556 35.768444 79.305619 
 127.203667 35.768444 79.636029 
 127.203889 35.768444 80.492459 
 127.204111 35.768444 80.336575 
 127.204222 35.768444 81.002326 
 127.204333 35.768444 81.514507 
 127.204444 35.768444 81.676852 
 127.203444 35.768444 79.591428 
 127.203556 35.768444 79.305619 
 127.203667 35.768444 79.636029 
 127.203778 35.768444 80.652222 
 127.204000 35.768444 80.027431 
 127.204222 35.768444 81.002326 
 127.204333 35.768444 81.514507 
 127.204444 35.768444 81.676852 
 127.204556 35.768444 81.837225 
 127.203444 35.768555 79.405874 
 127.203556 35.768555 79.466820 
 127.203667 35.768555 79.786800 
 127.203778 35.768555 79.954178 
 127.204000 35.768555 79.817661 
 127.204222 35.768555 80.851354 
 127.204333 35.768555 81.440633 
 127.204444 35.768555 81.653431 
 127.204556 35.768555 81.818811 
 127.203444 35.768667 79.428341 
 127.203556 35.768667 79.785143 
 127.203667 35.768667 80.017668 
 127.203778 35.768667 79.847821 
 127.204000 35.768667 79.790786 
 127.204222 35.768667 80.491812 
 127.204333 35.768667 81.197588 
 127.204444 35.768667 81.502571 
 127.204556 35.768667 81.710930 
 127.203556 35.768667 79.785143 
 127.203667 35.768667 80.017668 
 127.203778 35.768667 79.847821 
 127.203889 35.768667 79.763572 
 127.204111 35.768667 79.997776 
 127.204333 35.768667 81.197588 
 127.204444 35.768667 81.502571 
 127.204556 35.768667 81.710930 
 127.204667 35.768667 81.767436 
 127.203556 35.768778 80.051887 
 127.203667 35.768778 80.156613 
 127.203778 35.768778 79.917907 
 127.203889 35.768778 79.821742 
 127.204111 35.768778 79.917178 
 127.204333 35.768778 80.753111 
 127.204444 35.768778 81.124380 
 127.204556 35.768778 81.458582 
 127.204667 35.768778 81.553085 
 127.203556 35.768889 80.191672 
 127.203667 35.768889 80.215269 
 127.203778 35.768889 80.008310 
 127.203889 35.768889 79.934862 
 127.204111 35.768889 79.892571 
 127.204333 35.768889 80.278451 
 127.204444 35.768889 80.585281 
 127.204556 35.768889 81.025830 
 127.204667 35.768889 81.155796 
 127.203667 35.768889 80.215269 
 127.203778 35.768889 80.008310 
 127.203889 35.768889 79.934862 
 127.204000 35.768889 79.909016 
 127.204222 35.768889 79.984531 
 127.204444 35.768889 80.585281 
 127.204556 35.768889 81.025830 
 127.204667 35.768889 81.155796 
 127.204778 35.768889 80.450797 
 127.203667 35.769000 80.227832 
 127.203778 35.769000 80.074024 
 127.203889 35.769000 80.032933 
 127.204000 35.769000 79.972655 
 127.204222 35.769000 79.919775 
 127.204444 35.769000 80.121844 
 127.204556 35.769000 80.501525 
 127.204667 35.769000 80.631203 
 127.204778 35.769000 80.172169 
 127.203667 35.769111 80.209148 
 127.203778 35.769111 80.107259 
 127.203889 35.769111 80.084768 
 127.204000 35.769111 80.016359 
 127.204222 35.769111 79.925782 
 127.204444 35.769111 79.867644 
 127.204556 35.769111 80.084874 
 127.204667 35.769111 80.214718 
 127.204778 35.769111 80.054936 
 127.203778 35.769111 80.107259 
 127.203889 35.769111 80.084768 
 127.204000 35.769111 80.016359 
 127.204111 35.769111 79.913738 
 127.204333 35.769111 79.907355 
 127.204556 35.769111 80.084874 
 127.204667 35.769111 80.214718 
 127.204778 35.769111 80.054936 
 127.204889 35.769111 80.020022 
 127.203778 35.769222 80.118901 
 127.203889 35.769222 80.100227 
 127.204000 35.769222 80.037073 
 127.204111 35.769222 79.955551 
 127.204333 35.769222 79.961426 
 127.204556 35.769222 79.870119 
 127.204667 35.769222 80.023926 
 127.204778 35.769222 80.020539 
 127.204889 35.769222 80.027418 
 127.203778 35.769333 80.118280 
 127.203889 35.769333 80.091816 
 127.204000 35.769333 80.037515 
 127.204111 35.769333 80.003730 
 127.204333 35.769333 80.056100 
 127.204556 35.769333 79.823044 
 127.204667 35.769333 79.980048 
 127.204778 35.769333 80.018275 
 127.204889 35.769333 80.044708 
 127.203778 35.769444 80.106885 
 127.203889 35.769444 80.068037 
 127.204000 35.769444 80.029233 
 127.204111 35.769444 80.030233 
 127.204333 35.769444 80.118953 
 127.204556 35.769444 79.888109 
 127.204667 35.769444 79.992804 
 127.204778 35.769444 80.030441 
 127.204889 35.769444 80.073998 
 127.203889 35.769444 80.068037 
 127.204000 35.769444 80.029233 
 127.204111 35.769444 80.030233 
 127.204222 35.769444 80.108444 
 127.204444 35.769444 79.979593 
 127.204667 35.769444 79.992804 
 127.204778 35.769444 80.030441 
 127.204889 35.769444 80.073998 
 127.205000 35.769444 80.148788 
 127.203889 35.769555 80.042736 
 127.204000 35.769555 80.021999 
 127.204111 35.769555 80.033226 
 127.204222 35.769555 80.106538 
 127.204444 35.769555 80.076442 
 127.204667 35.769555 80.023994 
 127.204778 35.769555 80.055110 
 127.204889 35.769555 80.114262 
 127.205000 35.769555 80.181586 
 127.203889 35.769667 80.026590 
 127.204000 35.769667 80.016597 
 127.204111 35.769667 80.016951 
 127.204222 35.769667 80.056847 
 127.204444 35.769667 80.100653 
 127.204667 35.769667 80.060464 
 127.204778 35.769667 80.092489 
 127.204889 35.769667 80.156588 
 127.205000 35.769667 80.203280 
 127.204000 35.769667 80.016597 
 127.204111 35.769667 80.016951 
 127.204222 35.769667 80.056847 
 127.204333 35.769667 80.098183 
 127.204556 35.769667 80.073519 
 127.204778 35.769667 80.092489 
 127.204889 35.769667 80.156588 
 127.205000 35.769667 80.203280 
 127.205111 35.769667 80.218627 
 127.204000 35.769778 80.009213 
 127.204111 35.769778 79.970578 
 127.204222 35.769778 79.940193 
 127.204333 35.769778 79.999751 
 127.204556 35.769778 80.085429 
 127.204778 35.769778 80.132258 
 127.204889 35.769778 80.188943 
 127.205000 35.769778 80.214813 
 127.205111 35.769778 80.218690 
 127.204000 35.769889 79.992130 
 127.204111 35.769889 79.874290 
 127.204222 35.769889 79.775491 
 127.204333 35.769889 79.853391 
 127.204556 35.769889 80.062169 
 127.204778 35.769889 80.153532 
 127.204889 35.769889 80.206852 
 127.205000 35.769889 80.219581 
 127.205111 35.769889 80.215548 
 127.204111 35.769889 79.874290 
 127.204222 35.769889 79.775491 
 127.204333 35.769889 79.853391 
 127.204444 35.769889 80.009477 
 127.204667 35.769889 80.070651 
 127.204889 35.769889 80.206852 
 127.205000 35.769889 80.219581 
 127.205111 35.769889 80.215548 
 127.205222 35.769889 80.201352 
 127.204111 35.770000 79.738899 
 127.204222 35.770000 79.641336 
 127.204333 35.770000 79.720612 
 127.204444 35.770000 79.932112 
 127.204667 35.770000 80.004213 
 127.204889 35.770000 80.212476 
 127.205000 35.770000 80.220210 
 127.205111 35.770000 80.210176 
 127.205222 35.770000 80.194923 
 127.204111 35.770111 79.625357 
 127.204222 35.770111 79.571438 
 127.204333 35.770111 79.632278 
 127.204444 35.770111 79.823709 
 127.204667 35.770111 79.854851 
 127.204889 35.770111 80.206686 
 127.205000 35.770111 80.217618 
 127.205111 35.770111 80.203696 
 127.205222 35.770111 80.189268 
 127.204222 35.770111 79.571438 
 127.204333 35.770111 79.632278 
 127.204444 35.770111 79.823709 
 127.204556 35.770111 79.875549 
 127.204778 35.770111 80.062782 
 127.205000 35.770111 80.217618 
 127.205111 35.770111 80.203696 
 127.205222 35.770111 80.189268 
 127.205333 35.770111 80.168135 
 127.204222 35.770222 79.541001 
 127.204333 35.770222 79.569203 
 127.204444 35.770222 79.659770 
 127.204556 35.770222 79.651524 
 127.204778 35.770222 79.901102 
 127.205000 35.770222 80.210499 
 127.205111 35.770222 80.196387 
 127.205222 35.770222 80.182493 
 127.205333 35.770222 80.145481 
 127.204222 35.770333 79.525050 
 127.204333 35.770333 79.503221 
 127.204444 35.770333 79.437592 
 127.204556 35.770333 79.367882 
 127.204778 35.770333 79.664818 
 127.205000 35.770333 80.193455 
 127.205111 35.770333 80.186474 
 127.205222 35.770333 80.171112 
 127.205333 35.770333 80.105694 
 127.204333 35.770333 79.503221 
 127.204444 35.770333 79.437592 
 127.204556 35.770333 79.367882 
 127.204667 35.770333 79.330718 
 127.204889 35.770333 80.123739 
 127.205111 35.770333 80.186474 
 127.205222 35.770333 80.171112 
 127.205333 35.770333 80.105694 
 127.205444 35.770333 79.952995 
 127.204333 35.770444 79.409425 
 127.204444 35.770444 79.212799 
 127.204556 35.770444 79.140979 
 127.204667 35.770444 79.150196 
 127.204889 35.770444 80.013916 
 127.205111 35.770444 80.169167 
 127.205222 35.770444 80.149532 
 127.205333 35.770444 80.046682 
 127.205444 35.770444 79.904703 
 127.204333 35.770556 79.277455 
 127.204444 35.770556 79.059181 
 127.204556 35.770556 79.030408 
 127.204667 35.770556 79.101036 
 127.204889 35.770556 79.904409 
 127.205111 35.770556 80.139857 
 127.205222 35.770556 80.113071 
 127.205333 35.770556 79.981454 
 127.205444 35.770556 79.877561 
 127.204444 35.770556 79.059181 
 127.204556 35.770556 79.030408 
 127.204667 35.770556 79.101036 
 127.204778 35.770556 79.419219 
 127.205000 35.770556 80.100078 
 127.205222 35.770556 80.113071 
 127.205333 35.770556 79.981454 
 127.205444 35.770556 79.877561 
 127.205556 35.770556 79.883119 
 127.204444 35.770667 78.988746 
 127.204556 35.770667 79.009812 
 127.204667 35.770667 79.152148 
 127.204778 35.770667 79.490883 
 127.205000 35.770667 80.054234 
 127.205222 35.770667 80.069533 
 127.205333 35.770667 79.931914 
 127.205444 35.770667 79.868618 
 127.205556 35.770667 79.936919 
 127.204444 35.770778 78.974767 
 127.204556 35.770778 79.049383 
 127.204667 35.770778 79.270427 
 127.204778 35.770778 79.594539 
 127.205000 35.770778 80.031079 
 127.205222 35.770778 80.040766 
 127.205333 35.770778 79.908161 
 127.205444 35.770778 79.876862 
 127.205556 35.770778 80.052926 
 127.204556 35.770778 79.049383 
 127.204667 35.770778 79.270427 
 127.204778 35.770778 79.594539 
 127.204889 35.770778 79.857083 
 127.205111 35.770778 80.083702 
 127.205333 35.770778 79.908161 
 127.205444 35.770778 79.876862 
 127.205556 35.770778 80.052926 
 127.205667 35.770778 80.555768 
 127.204556 35.770889 79.141388 
 127.204667 35.770889 79.419385 
 127.204778 35.770889 79.676805 
 127.204889 35.770889 79.860623 
 127.205111 35.770889 80.074377 
 127.205333 35.770889 79.907404 
 127.205444 35.770889 79.910153 
 127.205556 35.770889 80.239358 
 127.205667 35.770889 80.727274 
 127.204556 35.771000 79.281351 
 127.204667 35.771000 79.556193 
 127.204778 35.771000 79.727566 
 127.204889 35.771000 79.862342 
 127.205111 35.771000 80.070285 
 127.205333 35.771000 79.925456 
 127.205444 35.771000 79.990326 
 127.205556 35.771000 80.450298 
 127.205667 35.771000 80.814133 
 127.204556 35.771111 79.441551 
 127.204667 35.771111 79.652754 
 127.204778 35.771111 79.755021 
 127.204889 35.771111 79.863597 
 127.205111 35.771111 80.064678 
 127.205333 35.771111 79.958218 
 127.205444 35.771111 80.142125 
 127.205556 35.771111 80.607681 
 127.205667 35.771111 80.843087 
 127.204667 35.771111 79.652754 
 127.204778 35.771111 79.755021 
 127.204889 35.771111 79.863597 
 127.205000 35.771111 80.009910 
 127.205222 35.771111 80.035491 
 127.205444 35.771111 80.142125 
 127.205556 35.771111 80.607681 
 127.205667 35.771111 80.843087 
 127.205778 35.771111 80.906070 
 127.204667 35.771222 79.709172 
 127.204778 35.771222 79.770322 
 127.204889 35.771222 79.869582 
 127.205000 35.771222 80.008277 
 127.205222 35.771222 79.999852 
 127.205444 35.771222 80.324622 
 127.205556 35.771222 80.674889 
 127.205667 35.771222 80.833405 
 127.205778 35.771222 80.905817 
 127.204667 35.771333 79.738692 
 127.204778 35.771333 79.783035 
 127.204889 35.771333 79.888511 
 127.205000 35.771333 80.011363 
 127.205222 35.771333 79.926095 
 127.205444 35.771333 80.421271 
 127.205556 35.771333 80.672283 
 127.205667 35.771333 80.796495 
 127.205778 35.771333 80.910039 
 127.204778 35.771333 79.783035 
 127.204889 35.771333 79.888511 
 127.205000 35.771333 80.011363 
 127.205111 35.771333 80.022007 
 127.205333 35.771333 79.954240 
 127.205556 35.771333 80.672283 
 127.205667 35.771333 80.796495 
 127.205778 35.771333 80.910039 
 127.205889 35.771333 81.014011 
 127.204778 35.771444 79.802625 
 127.204889 35.771444 79.926007 
 127.205000 35.771444 80.018869 
 127.205111 35.771444 79.986946 
 127.205333 35.771444 79.901222 
 127.205556 35.771444 80.643660 
 127.205667 35.771444 80.751641 
 127.205778 35.771444 80.927260 
 127.205889 35.771444 81.026642 
 127.204778 35.771556 79.838641 
 127.204889 35.771556 79.972602 
 127.205000 35.771556 80.026572 
 127.205111 35.771556 79.962007 
 127.205333 35.771556 79.865193 
 127.205556 35.771556 80.616998 
 127.205667 35.771556 80.725027 
 127.205778 35.771556 80.953234 
 127.205889 35.771556 81.032332 
 127.204889 35.771556 79.972602 
 127.205000 35.771556 80.026572 
 127.205111 35.771556 79.962007 
 127.205222 35.771556 79.814597 
 127.205444 35.771556 80.376638 
 127.205667 35.771556 80.725027 
 127.205778 35.771556 80.953234 
 127.205889 35.771556 81.032332 
 127.206000 35.771556 81.035659 
 127.204889 35.771667 80.009566 
 127.205000 35.771667 80.031820 
 127.205111 35.771667 79.951791 
 127.205222 35.771667 79.804255 
 127.205444 35.771667 80.344281 
 127.205667 35.771667 80.731381 
 127.205778 35.771667 80.979374 
 127.205889 35.771667 81.035109 
 127.206000 35.771667 81.030827 
 127.204889 35.771778 80.031031 
 127.205000 35.771778 80.035241 
 127.205111 35.771778 79.953265 
 127.205222 35.771778 79.821728 
 127.205444 35.771778 80.359847 
 127.205667 35.771778 80.775896 
 127.205778 35.771778 81.004956 
 127.205889 35.771778 81.037139 
 127.206000 35.771778 81.022309 
 127.205000 35.771778 80.035241 
 127.205111 35.771778 79.953265 
 127.205222 35.771778 79.821728 
 127.205333 35.771778 79.929687 
 127.205556 35.771778 80.587890 
 127.205778 35.771778 81.004956 
 127.205889 35.771778 81.037139 
 127.206000 35.771778 81.022309 
 127.206111 35.771778 80.999569 
 127.205000 35.771889 80.038294 
 127.205111 35.771889 79.968021 
 127.205222 35.771889 79.888474 
 127.205333 35.771889 80.073592 
 127.205556 35.771889 80.588674 
 127.205778 35.771889 81.030719 
 127.205889 35.771889 81.040001 
 127.206000 35.771889 81.012623 
 127.206111 35.771889 80.995320 
 127.205000 35.772000 80.042953 
 127.205111 35.772000 80.010098 
 127.205222 35.772000 80.043972 
 127.205333 35.772000 80.261743 
 127.205556 35.772000 80.600269 
 127.205778 35.772000 81.051160 
 127.205889 35.772000 81.044589 
 127.206000 35.772000 81.005254 
 127.206111 35.772000 80.993668 
 127.205111 35.772000 80.010098 
 127.205222 35.772000 80.043972 
 127.205333 35.772000 80.261743 
 127.205444 35.772000 80.482374 
 127.205667 35.772000 80.923908 
 127.205889 35.772000 81.044589 
 127.206000 35.772000 81.005254 
 127.206111 35.772000 80.993668 
 127.206222 35.772000 80.997474 
 127.205111 35.772111 80.107787 
 127.205222 35.772111 80.257553 
 127.205333 35.772111 80.404718 
 127.205444 35.772111 80.516874 
 127.205667 35.772111 80.966681 
 127.205889 35.772111 81.047880 
 127.206000 35.772111 80.999867 
 127.206111 35.772111 80.993152 
 127.206222 35.772111 81.002192 
 127.205111 35.772222 80.260792 
 127.205222 35.772222 80.407660 
 127.205333 35.772222 80.472942 
 127.205444 35.772222 80.533466 
 127.205667 35.772222 80.992289 
 127.205889 35.772222 81.038619 
 127.206000 35.772222 80.989892 
 127.206111 35.772222 80.992147 
 127.206222 35.772222 81.006476 
 127.205222 35.772222 80.407660 
 127.205333 35.772222 80.472942 
 127.205444 35.772222 80.533466 
 127.205556 35.772222 80.657182 
 127.205778 35.772222 81.062442 
 127.206000 35.772222 80.989892 
 127.206111 35.772222 80.992147 
 127.206222 35.772222 81.006476 
 127.206333 35.772222 81.008205 
 127.205222 35.772333 80.469287 
 127.205333 35.772333 80.496959 
 127.205444 35.772333 80.553153 
 127.205556 35.772333 80.752045 
 127.205778 35.772333 81.050654 
 127.206000 35.772333 80.966895 
 127.206111 35.772333 80.989117 
 127.206222 35.772333 81.007323 
 127.206333 35.772333 80.995804 
 127.205222 35.772444 80.489241 
 127.205333 35.772444 80.510062 
 127.205444 35.772444 80.613590 
 127.205556 35.772444 80.893221 
 127.205778 35.772444 81.012965 
 127.206000 35.772444 80.936627 
 127.206111 35.772444 80.985834 
 127.206222 35.772444 81.005203 
 127.206333 35.772444 80.967491 
 127.205333 35.772444 80.510062 
 127.205444 35.772444 80.613590 
 127.205556 35.772444 80.893221 
 127.205667 35.772444 81.027067 
 127.205889 35.772444 80.907981 
 127.206111 35.772444 80.985834 
 127.206222 35.772444 81.005203 
 127.206333 35.772444 80.967491 
 127.206444 35.772444 80.876801 
 127.205333 35.772556 80.541761 
 127.205444 35.772556 80.748293 
 127.205556 35.772556 80.987381 
 127.205667 35.772556 81.034758 
 127.205889 35.772556 80.835971 
 127.206111 35.772556 80.986663 
 127.206222 35.772556 81.005943 
 127.206333 35.772556 80.919375 
 127.206444 35.772556 80.812107 
 127.205333 35.772667 80.632257 
 127.205444 35.772667 80.899400 
 127.205556 35.772667 81.024457 
 127.205667 35.772667 81.041918 
 127.205889 35.772667 80.806635 
 127.206111 35.772667 81.010588 
 127.206222 35.772667 81.036844 
 127.206333 35.772667 80.874728 
 127.206444 35.772667 80.804289 
 127.205333 35.772778 80.790842 
 127.205444 35.772778 80.986908 
 127.205556 35.772778 81.039178 
 127.205667 35.772778 81.067441 
 127.205889 35.772778 80.811368 
 127.206111 35.772778 81.144596 
 127.206222 35.772778 81.185555 
 127.206333 35.772778 80.894344 
 127.206444 35.772778 80.897908 
 127.205444 35.772778 80.986908 
 127.205556 35.772778 81.039178 
 127.205667 35.772778 81.067441 
 127.205778 35.772778 80.941412 
 127.206000 35.772778 80.867489 
 127.206222 35.772778 81.185555 
 127.206333 35.772778 80.894344 
 127.206444 35.772778 80.897908 
 127.206556 35.772778 81.583583 
 127.205444 35.772889 81.020667 
 127.205556 35.772889 81.051685 
 127.205667 35.772889 81.137562 
 127.205778 35.772889 81.055281 
 127.206000 35.772889 80.963420 
 127.206222 35.772889 81.521572 
 127.206333 35.772889 81.044190 
 127.206444 35.772889 81.139236 
 127.206556 35.772889 82.068846 
 127.205444 35.773000 81.032284 
 127.205556 35.773000 81.072000 
 127.205667 35.773000 81.229411 
 127.205778 35.773000 81.201048 
 127.206000 35.773000 81.282511 
 127.206222 35.773000 81.886858 
 127.206333 35.773000 81.359499 
 127.206444 35.773000 81.558462 
 127.206556 35.773000 82.471521 
 127.205556 35.773000 81.072000 
 127.205667 35.773000 81.229411 
 127.205778 35.773000 81.201048 
 127.205889 35.773000 81.087559 
 127.206111 35.773000 81.919199 
 127.206333 35.773000 81.359499 
 127.206444 35.773000 81.558462 
 127.206556 35.773000 82.471521 
 127.206667 35.773000 82.650805 
 127.205556 35.773111 81.103195 
 127.205667 35.773111 81.289719 
 127.205778 35.773111 81.321321 
 127.205889 35.773111 81.485087 
 127.206111 35.773111 82.128948 
 127.206333 35.773111 81.772840 
 127.206444 35.773111 82.066965 
 127.206556 35.773111 82.710885 
 127.206667 35.773111 82.477609 
 127.205556 35.773222 81.142586 
 127.205667 35.773222 81.326641 
 127.205778 35.773222 81.460249 
 127.205889 35.773222 81.831164 
 127.206111 35.773222 82.217666 
 127.206333 35.773222 82.112379 
 127.206444 35.773222 82.489055 
 127.206556 35.773222 82.829358 
 127.206667 35.773222 82.137309 
 127.205667 35.773222 81.326641 
 127.205778 35.773222 81.460249 
 127.205889 35.773222 81.831164 
 127.206000 35.773222 81.967931 
 127.206222 35.773222 82.228847 
 127.206444 35.773222 82.489055 
 127.206556 35.773222 82.829358 
 127.206667 35.773222 82.137309 
 127.206778 35.773222 79.790736 
 127.205667 35.773333 81.384421 
 127.205778 35.773333 81.731708 
 127.205889 35.773333 82.061862 
 127.206000 35.773333 82.081480 
 127.206222 35.773333 82.292162 
 127.206444 35.773333 82.798682 
 127.206556 35.773333 82.922090 
 127.206667 35.773333 81.698165 
 127.206778 35.773333 79.614310 
 127.205667 35.773444 81.553980 
 127.205778 35.773444 82.127849 
 127.205889 35.773444 82.257632 
 127.206000 35.773444 82.205710 
 127.206222 35.773444 82.364994 
 127.206444 35.773444 83.144795 
 127.206556 35.773444 83.120041 
 127.206667 35.773444 81.448035 
 127.206778 35.773444 79.934218 
 127.205778 35.773444 82.127849 
 127.205889 35.773444 82.257632 
 127.206000 35.773444 82.205710 
 127.206111 35.773444 82.399669 
 127.206333 35.773444 82.461105 
 127.206556 35.773444 83.120041 
 127.206667 35.773444 81.448035 
 127.206778 35.773444 79.934218 
 127.206889 35.773444 82.311760 
 127.205778 35.773556 82.405988 
 127.205889 35.773556 82.420248 
 127.206000 35.773556 82.406204 
 127.206111 35.773556 82.564287 
 127.206333 35.773556 82.666986 
 127.206556 35.773556 83.519474 
 127.206667 35.773556 81.702869 
 127.206778 35.773556 80.861015 
 127.206889 35.773556 85.147605 
 127.205778 35.773667 82.515424 
 127.205889 35.773667 82.525598 
 127.206000 35.773667 82.627775 
 127.206111 35.773667 82.715339 
 127.206333 35.773667 82.964734 
 127.206556 35.773667 83.993935 
 127.206667 35.773667 82.485041 
 127.206778 35.773667 82.667715 
 127.206889 35.773667 89.879881 
 127.205889 35.773667 82.525598 
 127.206000 35.773667 82.627775 
 127.206111 35.773667 82.715339 
 127.206222 35.773667 82.639310 
 127.206444 35.773667 84.129945 
 127.206667 35.773667 82.485041 
 127.206778 35.773667 82.667715 
 127.206889 35.773667 89.879881 
 127.207000 35.773667 105.983434 
 127.205889 35.773778 82.595496 
 127.206000 35.773778 82.769909 
 127.206111 35.773778 82.804338 
 127.206222 35.773778 82.773090 
 127.206444 35.773778 84.411475 
 127.206667 35.773778 83.640263 
 127.206778 35.773778 85.820362 
 127.206889 35.773778 96.769661 
 127.207000 35.773778 111.592282 
 127.205889 35.773889 82.668478 
 127.206000 35.773889 82.833310 
 127.206111 35.773889 82.844684 
 127.206222 35.773889 82.852710 
 127.206444 35.773889 84.508621 
 127.206667 35.773889 85.052416 
 127.206778 35.773889 90.684095 
 127.206889 35.773889 104.622337 
 127.207000 35.773889 115.405653 
 127.206000 35.773889 82.833310 
 127.206111 35.773889 82.844684 
 127.206222 35.773889 82.852710 
 127.206333 35.773889 83.382852 
 127.206556 35.773889 84.698691 
 127.206778 35.773889 90.684095 
 127.206889 35.773889 104.622337 
 127.207000 35.773889 115.405653 
 127.207111 35.773889 119.062847 
 127.206000 35.774000 82.857757 
 127.206111 35.774000 82.861559 
 127.206222 35.774000 82.892480 
 127.206333 35.774000 83.379904 
 127.206556 35.774000 85.094126 
 127.206778 35.774000 96.885996 
 127.206889 35.774000 111.159964 
 127.207000 35.774000 117.622086 
 127.207111 35.774000 120.195238 
 127.206000 35.774111 82.866425 
 127.206111 35.774111 82.869690 
 127.206222 35.774111 82.920441 
 127.206333 35.774111 83.378594 
 127.206556 35.774111 85.983534 
 127.206778 35.774111 103.163915 
 127.206889 35.774111 115.254844 
 127.207000 35.774111 118.988271 
 127.207111 35.774111 121.846261 
 127.206111 35.774222 82.877654 
 127.206222 35.774222 82.963367 
 127.206333 35.774222 83.511030 
 127.206444 35.774222 85.571375 
 127.206667 35.774222 92.968685 
 127.206889 35.774222 117.445564 
 127.207000 35.774222 120.231095 
 127.207111 35.774222 124.265310 
 127.207222 35.774222 129.974483 
 127.206111 35.774333 82.893753 
 127.206222 35.774333 83.044792 
 127.206333 35.774333 83.860007 
 127.206444 35.774333 87.255610 
 127.206667 35.774333 99.234410 
 127.206889 35.774333 118.766348 
 127.207000 35.774333 121.904895 
 127.207111 35.774333 127.233468 
 127.207222 35.774333 132.226982 
 127.206111 35.774444 82.926791 
 127.206222 35.774444 83.190956 
 127.206333 35.774444 84.519951 
 127.206444 35.774444 89.929443 
 127.206667 35.774444 105.614180 
 127.206889 35.774444 119.952845 
 127.207000 35.774444 124.195635 
 127.207111 35.774444 130.019976 
 127.207222 35.774444 133.675870 
 127.206222 35.774444 83.190956 
 127.206333 35.774444 84.519951 
 127.206444 35.774444 89.929443 
 127.206556 35.774444 99.320203 
 127.206778 35.774444 114.173705 
 127.207000 35.774444 124.195635 
 127.207111 35.774444 130.019976 
 127.207222 35.774444 133.675870 
 127.207333 35.774444 135.692093 
 127.206222 35.774556 83.450784 
 127.206333 35.774556 85.663319 
 127.206444 35.774556 93.490123 
 127.206556 35.774556 103.918554 
 127.206778 35.774556 115.460263 
 127.207000 35.774556 126.589247 
 127.207111 35.774556 132.003851 
 127.207222 35.774556 134.596972 
 127.207333 35.774556 136.942098 
 127.206222 35.774667 83.916378 
 127.206333 35.774667 87.539813 
 127.206444 35.774667 97.544937 
 127.206556 35.774667 106.693054 
 127.206778 35.774667 116.443068 
 127.207000 35.774667 128.003994 
 127.207111 35.774667 133.046797 
 127.207222 35.774667 135.323285 
 127.207333 35.774667 138.755410 
 127.206333 35.774667 87.539813 
 127.206444 35.774667 97.544937 
 127.206556 35.774667 106.693054 
 127.206667 35.774667 110.846384 
 127.206889 35.774667 122.136974 
 127.207111 35.774667 133.046797 
 127.207222 35.774667 135.323285 
 127.207333 35.774667 138.755410 
 127.207444 35.774667 144.882991 
 127.206333 35.774778 90.412522 
 127.206444 35.774778 101.467517 
 127.206556 35.774778 108.324271 
 127.206667 35.774778 111.831967 
 127.206889 35.774778 122.517041 
 127.207111 35.774778 133.323028 
 127.207222 35.774778 136.155264 
 127.207333 35.774778 141.159347 
 127.207444 35.774778 147.057749 
 127.206333 35.774889 94.299548 
 127.206444 35.774889 104.657545 
 127.206556 35.774889 109.339430 
 127.206667 35.774889 112.740951 
 127.206889 35.774889 122.694773 
 127.207111 35.774889 133.061750 
 127.207222 35.774889 137.352741 
 127.207333 35.774889 143.808194 
 127.207444 35.774889 148.556500 
 127.206444 35.774889 104.657545 
 127.206556 35.774889 109.339430 
 127.206667 35.774889 112.740951 
 127.206778 35.774889 118.507840 
 127.207000 35.774889 127.003459 
 127.207222 35.774889 137.352741 
 127.207333 35.774889 143.808194 
 127.207444 35.774889 148.556500 
 127.207556 35.774889 150.336709 
 127.206444 35.775000 106.886497 
 127.206556 35.775000 110.060309 
 127.206667 35.775000 113.792763 
 127.206778 35.775000 119.652606 
 127.207000 35.775000 126.206352 
 127.207222 35.775000 139.151724 
 127.207333 35.775000 146.271553 
 127.207444 35.775000 149.655165 
 127.207556 35.775000 151.335059 
 127.206444 35.775111 108.295674 
 127.206556 35.775111 110.720824 
 127.206667 35.775111 115.215199 
 127.206778 35.775111 121.111149 
 127.207000 35.775111 126.512738 
 127.207222 35.775111 141.845991 
 127.207333 35.775111 148.496552 
 127.207444 35.775111 150.812466 
 127.207556 35.775111 153.099120 
 127.206556 35.775111 110.720824 
 127.206667 35.775111 115.215199 
 127.206778 35.775111 121.111149 
 127.206889 35.775111 123.833851 
 127.207111 35.775111 133.250122 
 127.207333 35.775111 148.496552 
 127.207444 35.775111 150.812466 
 127.207556 35.775111 153.099120 
 127.207667 35.775111 162.987256 
 127.206556 35.775222 111.588028 
 127.206667 35.775222 117.465502 
 127.206778 35.775222 123.370628 
 127.206889 35.775222 125.674592 
 127.207111 35.775222 136.746657 
 127.207333 35.775222 150.909492 
 127.207444 35.775222 152.610011 
 127.207556 35.775222 156.051548 
 127.207667 35.775222 166.872650 
 127.206556 35.775333 113.176619 
 127.206667 35.775333 121.269713 
 127.206778 35.775333 126.901250 
 127.206889 35.775333 129.037339 
 127.207111 35.775333 143.246186 
 127.207333 35.775333 154.080383 
 127.207444 35.775333 155.536058 
 127.207556 35.775333 159.946579 
 127.207667 35.775333 169.534746 
 127.206667 35.775333 121.269713 
 127.206778 35.775333 126.901250 
 127.206889 35.775333 129.037339 
 127.207000 35.775333 133.784015 
 127.207222 35.775333 150.769952 
 127.207444 35.775333 155.536058 
 127.207556 35.775333 159.946579 
 127.207667 35.775333 169.534746 
 127.207778 35.775333 172.795626 
 127.206667 35.775444 126.635616 
 127.206778 35.775444 131.174504 
 127.206889 35.775444 133.438003 
 127.207000 35.775444 139.960548 
 127.207222 35.775444 154.855054 
 127.207444 35.775444 159.151782 
 127.207556 35.775444 163.638564 
 127.207667 35.775444 171.387764 
 127.207778 35.775444 173.743367 
 127.206667 35.775556 131.834410 
 127.206778 35.775556 134.793606 
 127.206889 35.775556 137.458751 
 127.207000 35.775556 145.159099 
 127.207222 35.775556 157.035914 
 127.207444 35.775556 162.157839 
 127.207556 35.775556 166.395449 
 127.207667 35.775556 173.271251 
 127.207778 35.775556 175.509484 
 127.206778 35.775556 134.793606 
 127.206889 35.775556 137.458751 
 127.207000 35.775556 145.159099 
 127.207111 35.775556 152.846315 
 127.207333 35.775556 160.568393 
 127.207556 35.775556 166.395449 
 127.207667 35.775556 173.271251 
 127.207778 35.775556 175.509484 
 127.207889 35.775556 177.075299 
 127.206778 35.775667 137.106126 
 127.206889 35.775667 140.323163 
 127.207000 35.775667 148.569095 
 127.207111 35.775667 154.681959 
 127.207333 35.775667 162.160829 
 127.207556 35.775667 168.617777 
 127.207667 35.775667 176.124550 
 127.207778 35.775667 178.912600 
 127.207889 35.775667 181.698434 
 127.206778 35.775778 138.448697 
 127.206889 35.775778 142.303452 
 127.207000 35.775778 150.751655 
 127.207111 35.775778 155.844814 
 127.207333 35.775778 163.107543 
 127.207556 35.775778 171.175980 
 127.207667 35.775778 180.624914 
 127.207778 35.775778 184.436001 
 127.207889 35.775778 188.494486 
 127.206778 35.775889 139.326128 
 127.206889 35.775889 143.936507 
 127.207000 35.775889 152.440874 
 127.207111 35.775889 157.138298 
 127.207333 35.775889 164.237021 
 127.207556 35.775889 174.729657 
 127.207667 35.775889 186.310625 
 127.207778 35.775889 190.799372 
 127.207889 35.775889 195.066896 
 127.206889 35.775889 143.936507 
 127.207000 35.775889 152.440874 
 127.207111 35.775889 157.138298 
 127.207222 35.775889 160.702363 
 127.207444 35.775889 166.580077 
 127.207667 35.775889 186.310625 
 127.207778 35.775889 190.799372 
 127.207889 35.775889 195.066896 
 127.208000 35.775889 202.270470 
 127.206889 35.776000 145.624056 
 127.207000 35.776000 154.185828 
 127.207111 35.776000 159.210126 
 127.207222 35.776000 163.546313 
 127.207444 35.776000 168.400657 
 127.207667 35.776000 191.422365 
 127.207778 35.776000 195.488293 
 127.207889 35.776000 199.091065 
 127.208000 35.776000 204.009487 
 127.206889 35.776111 147.673124 
 127.207000 35.776111 156.484937 
 127.207111 35.776111 162.379466 
 127.207222 35.776111 166.960226 
 127.207444 35.776111 170.588201 
 127.207667 35.776111 194.616465 
 127.207778 35.776111 197.674655 
 127.207889 35.776111 200.774223 
 127.208000 35.776111 204.565267 
 127.207000 35.776111 156.484937 
 127.207111 35.776111 162.379466 
 127.207222 35.776111 166.960226 
 127.207333 35.776111 168.520491 
 127.207556 35.776111 183.806092 
 127.207778 35.776111 197.674655 
 127.207889 35.776111 200.774223 
 127.208000 35.776111 204.565267 
 127.208111 35.776111 205.422338 
 127.207000 35.776222 159.701356 
 127.207111 35.776222 166.048147 
 127.207222 35.776222 169.671230 
 127.207333 35.776222 170.153327 
 127.207556 35.776222 185.984637 
 127.207778 35.776222 197.798804 
 127.207889 35.776222 200.897696 
 127.208000 35.776222 204.434715 
 127.208111 35.776222 204.738425 
 127.207000 35.776333 163.630346 
 127.207111 35.776333 169.079588 
 127.207222 35.776333 171.139927 
 127.207333 35.776333 170.218953 
 127.207556 35.776333 182.636473 
 127.207778 35.776333 195.698347 
 127.207889 35.776333 199.412965 
 127.208000 35.776333 203.534082 
 127.208111 35.776333 203.349161 
 127.207111 35.776333 169.079588 
 127.207222 35.776333 171.139927 
 127.207333 35.776333 170.218953 
 127.207444 35.776333 168.775016 
 127.207667 35.776333 193.349270 
 127.207889 35.776333 199.412965 
 127.208000 35.776333 203.534082 
 127.208111 35.776333 203.349161 
 127.208222 35.776333 196.272537 
 127.207111 35.776444 170.930205 
 127.207222 35.776444 171.522184 
 127.207333 35.776444 168.605467 
 127.207444 35.776444 163.183735 
 127.207667 35.776444 186.702467 
 127.207889 35.776444 195.365008 
 127.208000 35.776444 201.335726 
 127.208111 35.776444 200.752687 
 127.208222 35.776444 191.035204 
 127.207111 35.776556 171.780674 
 127.207222 35.776556 170.962012 
 127.207333 35.776556 165.399204 
 127.207444 35.776556 157.792287 
 127.207667 35.776556 175.352685 
 127.207889 35.776556 187.533126 
 127.208000 35.776556 196.862662 
 127.208111 35.776556 196.319130 
 127.208222 35.776556 185.268661 
 127.207222 35.776556 170.962012 
 127.207333 35.776556 165.399204 
 127.207444 35.776556 157.792287 
 127.207556 35.776556 162.519074 
 127.207778 35.776556 179.832386 
 127.208000 35.776556 196.862662 
 127.208111 35.776556 196.319130 
 127.208222 35.776556 185.268661 
 127.208333 35.776556 176.341350 
 127.207222 35.776667 169.309061 
 127.207333 35.776667 161.149841 
 127.207444 35.776667 154.233122 
 127.207556 35.776667 155.907571 
 127.207778 35.776667 167.938914 
 127.208000 35.776667 189.172031 
 127.208111 35.776667 189.898592 
 127.208222 35.776667 180.286518 
 127.208333 35.776667 174.946000 
 127.207222 35.776778 166.301893 
 127.207333 35.776778 157.041249 
 127.207444 35.776778 152.314053 
 127.207556 35.776778 152.818678 
 127.207778 35.776778 159.171102 
 127.208000 35.776778 178.914468 
 127.208111 35.776778 182.651517 
 127.208222 35.776778 176.870037 
 127.208333 35.776778 174.187329 
 127.207333 35.776778 157.041249 
 127.207444 35.776778 152.314053 
 127.207556 35.776778 152.818678 
 127.207667 35.776778 156.578130 
 127.207889 35.776778 165.764391 
 127.208111 35.776778 182.651517 
 127.208222 35.776778 176.870037 
 127.208333 35.776778 174.187329 
 127.208444 35.776778 173.533515 
 127.207333 35.776889 154.034618 
 127.207444 35.776889 151.355732 
 127.207556 35.776889 151.402663 
 127.207667 35.776889 152.821216 
 127.207889 35.776889 158.361535 
 127.208111 35.776889 176.491214 
 127.208222 35.776889 174.885189 
 127.208333 35.776889 173.760365 
 127.208444 35.776889 173.296524 
 127.207333 35.777000 152.255847 
 127.207444 35.777000 150.829029 
 127.207556 35.777000 150.393244 
 127.207667 35.777000 150.333965 
 127.207889 35.777000 154.034144 
 127.208111 35.777000 172.333925 
 127.208222 35.777000 173.795106 
 127.208333 35.777000 173.449323 
 127.208444 35.777000 172.952274 
 127.207444 35.777000 150.829029 
 127.207556 35.777000 150.393244 
 127.207667 35.777000 150.333965 
 127.207778 35.777000 151.335374 
 127.208000 35.777000 162.054503 
 127.208222 35.777000 173.795106 
 127.208333 35.777000 173.449323 
 127.208444 35.777000 172.952274 
 127.208556 35.777000 172.135801 
 127.207444 35.777111 150.337774 
 127.207556 35.777111 148.875518 
 127.207667 35.777111 147.518342 
 127.207778 35.777111 148.551562 
 127.208000 35.777111 157.711757 
 127.208222 35.777111 173.042842 
 127.208333 35.777111 173.088671 
 127.208444 35.777111 172.466028 
 127.208556 35.777111 171.613592 
 127.207444 35.777222 149.427619 
 127.207556 35.777222 146.059390 
 127.207667 35.777222 143.847962 
 127.207778 35.777222 145.197267 
 127.208000 35.777222 154.638389 
 127.208222 35.777222 172.108125 
 127.208333 35.777222 172.542353 
 127.208444 35.777222 171.892713 
 127.208556 35.777222 171.227846 
 127.207444 35.777333 147.362228 
 127.207556 35.777333 141.849545 
 127.207667 35.777333 139.870778 
 127.207778 35.777333 141.503045 
 127.208000 35.777333 152.059373 
 127.208222 35.777333 170.395303 
 127.208333 35.777333 171.723753 
 127.208444 35.777333 171.355266 
 127.208556 35.777333 171.038756 
 127.207556 35.777333 141.849545 
 127.207667 35.777333 139.870778 
 127.207778 35.777333 141.503045 
 127.207889 35.777333 145.077016 
 127.208111 35.777333 163.747708 
 127.208333 35.777333 171.723753 
 127.208444 35.777333 171.355266 
 127.208556 35.777333 171.038756 
 127.208667 35.777333 171.822741 
 127.207556 35.777445 137.552070 
 127.207667 35.777445 136.562635 
 127.207778 35.777445 138.281847 
 127.207889 35.777445 142.450266 
 127.208111 35.777445 159.861872 
 127.208333 35.777445 170.661414 
 127.208444 35.777445 170.949628 
 127.208556 35.777445 171.062578 
 127.208667 35.777445 172.950876 
 127.207556 35.777556 134.517799 
 127.207667 35.777556 134.367842 
 127.207778 35.777556 136.147134 
 127.207889 35.777556 141.193588 
 127.208111 35.777556 156.904815 
 127.208333 35.777556 169.474033 
 127.208444 35.777556 170.691652 
 127.208556 35.777556 171.330825 
 127.208667 35.777556 174.782942 
 127.207667 35.777556 134.367842 
 127.207778 35.777556 136.147134 
 127.207889 35.777556 141.193588 
 127.208000 35.777556 150.041688 
 127.208222 35.777556 163.944339 
 127.208444 35.777556 170.691652 
 127.208556 35.777556 171.330825 
 127.208667 35.777556 174.782942 
 127.208778 35.777556 181.913690 
 127.207667 35.777667 133.152081 
 127.207778 35.777667 135.224856 
 127.207889 35.777667 141.653751 
 127.208000 35.777667 150.816589 
 127.208222 35.777667 160.952544 
 127.208444 35.777667 170.575992 
 127.208556 35.777667 171.939390 
 127.208667 35.777667 177.242421 
 127.208778 35.777667 184.349318 
 127.207667 35.777778 132.655288 
 127.207778 35.777778 135.435760 
 127.207889 35.777778 143.520635 
 127.208000 35.777778 151.931624 
 127.208222 35.777778 159.211096 
 127.208444 35.777778 170.690387 
 127.208556 35.777778 173.097446 
 127.208667 35.777778 180.052951 
 127.208778 35.777778 186.131730 
 127.207778 35.777778 135.435760 
 127.207889 35.777778 143.520635 
 127.208000 35.777778 151.931624 
 127.208111 35.777778 155.074325 
 127.208333 35.777778 167.253690 
 127.208556 35.777778 173.097446 
 127.208667 35.777778 180.052951 
 127.208778 35.777778 186.131730 
 127.208889 35.777778 188.469668 
 127.207778 35.777889 136.730128 
 127.207889 35.777889 146.144084 
 127.208000 35.777889 152.970226 
 127.208111 35.777889 155.261141 
 127.208333 35.777889 166.969994 
 127.208556 35.777889 175.250244 
 127.208667 35.777889 183.036416 
 127.208778 35.777889 187.613183 
 127.208889 35.777889 189.726263 
 127.207778 35.778000 139.091166 
 127.207889 35.778000 148.827407 
 127.208000 35.778000 153.870693 
 127.208111 35.778000 156.028890 
 127.208333 35.778000 168.628476 
 127.208556 35.778000 179.124548 
 127.208667 35.778000 186.301728 
 127.208778 35.778000 189.277015 
 127.208889 35.778000 191.792741 
 127.207889 35.778000 148.827407 
 127.208000 35.778000 153.870693 
 127.208111 35.778000 156.028890 
 127.208222 35.778000 160.362482 
 127.208444 35.778000 173.710694 
 127.208667 35.778000 186.301728 
 127.208778 35.778000 189.277015 
 127.208889 35.778000 191.792741 
 127.209000 35.778000 198.809696 
 127.207889 35.778111 151.117220 
 127.208000 35.778111 154.803185 
 127.208111 35.778111 157.725044 
 127.208222 35.778111 164.129316 
 127.208444 35.778111 178.723799 
 127.208667 35.778111 190.094465 
 127.208778 35.778111 191.651272 
 127.208889 35.778111 195.155684 
 127.209000 35.778111 203.532975 
 127.207889 35.778222 152.905304 
 127.208000 35.778222 156.104116 
 127.208111 35.778222 160.927750 
 127.208222 35.778222 170.114463 
 127.208444 35.778222 185.173768 
 127.208667 35.778222 194.096347 
 127.208778 35.778222 194.916137 
 127.208889 35.778222 199.551657 
 127.209000 35.778222 207.303564 
 127.208000 35.778222 156.104116 
 127.208111 35.778222 160.927750 
 127.208222 35.778222 170.114463 
 127.208333 35.778222 179.470335 
 127.208556 35.778222 191.359081 
 127.208778 35.778222 194.916137 
 127.208889 35.778222 199.551657 
 127.209000 35.778222 207.303564 
 127.209111 35.778222 211.469599 
 127.208000 35.778333 158.279020 
 127.208111 35.778333 166.027308 
 127.208222 35.778333 176.831491 
 127.208333 35.778333 184.577971 
 127.208556 35.778333 195.625510 
 127.208778 35.778333 198.338596 
 127.208889 35.778333 203.614132 
 127.209000 35.778333 209.623295 
 127.209111 35.778333 212.833951 
 127.208000 35.778445 161.917732 
 127.208111 35.778445 172.507755 
 127.208222 35.778445 182.392189 
 127.208333 35.778445 187.705150 
 127.208556 35.778445 197.787031 
 127.208778 35.778445 200.836281 
 127.208889 35.778445 206.251813 
 127.209000 35.778445 210.983855 
 127.209111 35.778445 214.919664 
 127.208111 35.778556 178.791490 
 127.208222 35.778556 186.040145 
 127.208333 35.778556 189.506021 
 127.208444 35.778556 193.939495 
 127.208667 35.778556 200.282731 
 127.208889 35.778556 207.578705 
 127.209000 35.778556 212.084494 
 127.209111 35.778556 218.358482 
 127.209222 35.778556 229.358937 
 127.208111 35.778667 183.563975 
 127.208222 35.778667 188.170435 
 127.208333 35.778667 190.837269 
 127.208444 35.778667 195.896535 
 127.208667 35.778667 201.092738 
 127.208889 35.778667 208.241431 
 127.209000 35.778667 213.505349 
 127.209111 35.778667 223.170922 
 127.209222 35.778667 234.791344 
 127.208111 35.778778 186.581905 
 127.208222 35.778778 189.431277 
 127.208333 35.778778 192.346942 
 127.208444 35.778778 198.732157 
 127.208667 35.778778 202.256486 
 127.208889 35.778778 208.835079 
 127.209000 35.778778 215.621002 
 127.209111 35.778778 228.383614 
 127.209222 35.778778 238.287731 
 127.208222 35.778778 189.431277 
 127.208333 35.778778 192.346942 
 127.208444 35.778778 198.732157 
 127.208556 35.778778 202.876825 
 127.208778 35.778778 203.428829 
 127.209000 35.778778 215.621002 
 127.209111 35.778778 228.383614 
 127.209222 35.778778 238.287731 
 127.209333 35.778778 240.941225 
 127.208222 35.778889 190.352535 
 127.208333 35.778889 194.465767 
 127.208444 35.778889 202.113762 
 127.208556 35.778889 205.501042 
 127.208778 35.778889 204.761198 
 127.209000 35.778889 218.443988 
 127.209111 35.778889 232.645266 
 127.209222 35.778889 239.917156 
 127.209333 35.778889 240.189002 
 127.208222 35.779000 191.291294 
 127.208333 35.779000 197.253352 
 127.208444 35.779000 205.163541 
 127.208556 35.779000 207.678771 
 127.208778 35.779000 207.854146 
 127.209000 35.779000 221.123076 
 127.209111 35.779000 234.723158 
 127.209222 35.779000 239.522763 
 127.209333 35.779000 237.521068 
 127.208333 35.779000 197.253352 
 127.208444 35.779000 205.163541 
 127.208556 35.779000 207.678771 
 127.208667 35.779000 206.571681 
 127.208889 35.779000 212.764070 
 127.209111 35.779000 234.723158 
 127.209222 35.779000 239.522763 
 127.209333 35.779000 237.521068 
 127.209444 35.779000 232.382728 
 127.208333 35.779111 200.345920 
 127.208444 35.779111 207.340792 
 127.208556 35.779111 208.930220 
 127.208667 35.779111 208.649554 
 127.208889 35.779111 216.289589 
 127.209111 35.779111 232.792482 
 127.209222 35.779111 235.579777 
 127.209333 35.779111 232.788156 
 127.209444 35.779111 230.299909 
 127.208333 35.779222 203.178652 
 127.208444 35.779222 208.572836 
 127.208556 35.779222 208.974054 
 127.208667 35.779222 209.145205 
 127.208889 35.779222 218.288715 
 127.209111 35.779222 223.698758 
 127.209222 35.779222 224.935167 
 127.209333 35.779222 226.286008 
 127.209444 35.779222 228.016970 
 127.208444 35.779222 208.572836 
 127.208556 35.779222 208.974054 
 127.208667 35.779222 209.145205 
 127.208778 35.779222 215.168427 
 127.209000 35.779222 219.255468 
 127.209222 35.779222 224.935167 
 127.209333 35.779222 226.286008 
 127.209444 35.779222 228.016970 
 127.209556 35.779222 223.388398 
 127.208444 35.779333 208.855401 
 127.208556 35.779333 207.464593 
 127.208667 35.779333 207.686800 
 127.208778 35.779333 215.542841 
 127.209000 35.779333 215.737266 
 127.209222 35.779333 208.008327 
 127.209333 35.779333 218.137401 
 127.209444 35.779333 224.561108 
 127.209556 35.779333 217.891391 
 127.208444 35.779444 208.003474 
 127.208556 35.779444 204.818774 
 127.208667 35.779444 205.578171 
 127.208778 35.779444 214.512759 
 127.209000 35.779444 212.086239 
 127.209222 35.779444 193.347296 
 127.209333 35.779444 208.313440 
 127.209444 35.779444 218.756827 
 127.209556 35.779444 210.294242 
 127.208556 35.779444 204.818774 
 127.208667 35.779444 205.578171 
 127.208778 35.779444 214.512759 
 127.208889 35.779444 217.676370 
 127.209111 35.779444 195.834204 
 127.209333 35.779444 208.313440 
 127.209444 35.779444 218.756827 
 127.209556 35.779444 210.294242 
 127.209667 35.779444 197.236156 
 127.208556 35.779555 202.470317 
 127.208667 35.779555 203.989498 
 127.208778 35.779555 212.823017 
 127.208889 35.779555 215.286927 
 127.209111 35.779555 189.003405 
 127.209333 35.779555 198.096556 
 127.209444 35.779555 210.115718 
 127.209556 35.779555 202.415558 
 127.209667 35.779555 194.697000 
 127.208556 35.779667 201.080956 
 127.208667 35.779667 202.986853 
 127.208778 35.779667 210.226318 
 127.208889 35.779667 209.985661 
 127.209111 35.779667 184.881573 
 127.209333 35.779667 189.873784 
 127.209444 35.779667 200.454474 
 127.209556 35.779667 196.463823 
 127.209667 35.779667 193.130125 
 127.208667 35.779667 202.986853 
 127.208778 35.779667 210.226318 
 127.208889 35.779667 209.985661 
 127.209000 35.779667 200.117654 
 127.209222 35.779667 182.174395 
 127.209444 35.779667 200.454474 
 127.209556 35.779667 196.463823 
 127.209667 35.779667 193.130125 
 127.209778 35.779667 192.040940 
 127.208667 35.779778 202.100852 
 127.208778 35.779778 205.282534 
 127.208889 35.779778 200.079945 
 127.209000 35.779778 189.891629 
 127.209222 35.779778 180.487339 
 127.209444 35.779778 192.860689 
 127.209556 35.779778 192.543708 
 127.209667 35.779778 191.621899 
 127.209778 35.779778 190.416691 
 127.208667 35.779889 200.230644 
 127.208778 35.779889 195.828215 
 127.208889 35.779889 186.558082 
 127.209000 35.779889 178.819155 
 127.209222 35.779889 178.915666 
 127.209444 35.779889 187.514943 
 127.209556 35.779889 188.897457 
 127.209667 35.779889 189.139225 
 127.209778 35.779889 187.690163 
 127.208667 35.780000 194.811209 
 127.208778 35.780000 182.769028 
 127.208889 35.780000 174.548028 
 127.209000 35.780000 170.329754 
 127.209222 35.780000 176.026425 
 127.209444 35.780000 182.206298 
 127.209556 35.780000 183.845329 
 127.209667 35.780000 184.929570 
 127.209778 35.780000 184.536192 
 127.208778 35.780000 182.769028 
 127.208889 35.780000 174.548028 
 127.209000 35.780000 170.329754 
 127.209111 35.780000 171.716908 
 127.209333 35.780000 178.749642 
 127.209556 35.780000 183.845329 
 127.209667 35.780000 184.929570 
 127.209778 35.780000 184.536192 
 127.209889 35.780000 183.203434 
 127.208778 35.780111 171.835014 
 127.208889 35.780111 167.355509 
 127.209000 35.780111 165.444536 
 127.209111 35.780111 166.740529 
 127.209333 35.780111 173.384399 
 127.209556 35.780111 177.586141 
 127.209667 35.780111 179.622651 
 127.209778 35.780111 182.082159 
 127.209889 35.780111 182.747837 
 127.208778 35.780222 165.891838 
 127.208889 35.780222 163.984810 
 127.209000 35.780222 162.994864 
 127.209111 35.780222 162.814909 
 127.209333 35.780222 166.689837 
 127.209556 35.780222 172.234292 
 127.209667 35.780222 175.110977 
 127.209778 35.780222 180.646110 
 127.209889 35.780222 182.702881 
 127.208889 35.780222 163.984810 
 127.209000 35.780222 162.994864 
 127.209111 35.780222 162.814909 
 127.209222 35.780222 163.890144 
 127.209444 35.780222 170.636897 
 127.209667 35.780222 175.110977 
 127.209778 35.780222 180.646110 
 127.209889 35.780222 182.702881 
 127.210000 35.780222 184.475519 
 127.208889 35.780333 162.558118 
 127.209000 35.780333 161.693834 
 127.209111 35.780333 160.266555 
 127.209222 35.780333 159.735017 
 127.209444 35.780333 167.338104 
 127.209667 35.780333 172.511436 
 127.209778 35.780333 180.044258 
 127.209889 35.780333 183.093789 
 127.210000 35.780333 187.054333 
 127.208889 35.780444 161.910934 
 127.209000 35.780444 160.770181 
 127.209111 35.780444 158.795920 
 127.209222 35.780444 158.128437 
 127.209444 35.780444 165.754828 
 127.209667 35.780444 171.800272 
 127.209778 35.780444 180.300306 
 127.209889 35.780444 184.227111 
 127.210000 35.780444 191.400517 
 127.209000 35.780444 160.770181 
 127.209111 35.780444 158.795920 
 127.209222 35.780444 158.128437 
 127.209333 35.780444 160.220422 
 127.209556 35.780444 167.785041 
 127.209778 35.780444 180.300306 
 127.209889 35.780444 184.227111 
 127.210000 35.780444 191.400517 
 127.210111 35.780444 201.945340 
 127.209000 35.780555 159.906326 
 127.209111 35.780555 158.012818 
 127.209222 35.780555 157.733071 
 127.209333 35.780555 159.939920 
 127.209556 35.780555 167.774274 
 127.209778 35.780555 181.713175 
 127.209889 35.780555 186.343144 
 127.210000 35.780555 196.059309 
 127.210111 35.780555 203.896110 
 127.209000 35.780667 159.070175 
 127.209111 35.780667 157.647437 
 127.209222 35.780667 157.933423 
 127.209333 35.780667 160.912510 
 127.209556 35.780667 168.948280 
 127.209778 35.780667 184.011157 
 127.209889 35.780667 188.710878 
 127.210000 35.780667 199.058367 
 127.210111 35.780667 204.796322 
 127.209111 35.780667 157.647437 
 127.209222 35.780667 157.933423 
 127.209333 35.780667 160.912510 
 127.209444 35.780667 166.171472 
 127.209667 35.780667 175.997109 
 127.209889 35.780667 188.710878 
 127.210000 35.780667 199.058367 
 127.210111 35.780667 204.796322 
 127.210222 35.780667 206.574916 
 127.209111 35.780778 157.581080 
 127.209222 35.780778 158.703143 
 127.209333 35.780778 163.049925 
 127.209444 35.780778 167.914694 
 127.209667 35.780778 179.820520 
 127.209889 35.780778 190.063702 
 127.210000 35.780778 200.191075 
 127.210111 35.780778 205.356330 
 127.210222 35.780778 207.501536 
 127.209111 35.780889 157.823373 
 127.209222 35.780889 160.250696 
 127.209333 35.780889 165.767865 
 127.209444 35.780889 169.621917 
 127.209667 35.780889 182.748561 
 127.209889 35.780889 190.339762 
 127.210000 35.780889 200.272130 
 127.210111 35.780889 206.022705 
 127.210222 35.780889 208.790084 
 127.209222 35.780889 160.250696 
 127.209333 35.780889 165.767865 
 127.209444 35.780889 169.621917 
 127.209556 35.780889 173.159437 
 127.209778 35.780889 187.131587 
 127.210000 35.780889 200.272130 
 127.210111 35.780889 206.022705 
 127.210222 35.780889 208.790084 
 127.210333 35.780889 211.333412 
 127.209222 35.781000 162.657244 
 127.209333 35.781000 168.135327 
 127.209444 35.781000 170.822773 
 127.209556 35.781000 174.762593 
 127.209778 35.781000 187.776391 
 127.210000 35.781000 200.054924 
 127.210111 35.781000 207.099118 
 127.210222 35.781000 210.214654 
 127.210333 35.781000 211.927001 
 127.209222 35.781111 165.452716 
 127.209333 35.781111 169.735073 
 127.209444 35.781111 171.914204 
 127.209556 35.781111 177.033225 
 127.209778 35.781111 188.623750 
 127.210000 35.781111 200.182805 
 127.210111 35.781111 208.596051 
 127.210222 35.781111 211.342570 
 127.210333 35.781111 212.146177 
 127.209333 35.781111 169.735073 
 127.209444 35.781111 171.914204 
 127.209556 35.781111 177.033225 
 127.209667 35.781111 186.358861 
 127.209889 35.781111 190.445086 
 127.210111 35.781111 208.596051 
 127.210222 35.781111 211.342570 
 127.210333 35.781111 212.146177 
 127.210444 35.781111 211.718444 
 127.209333 35.781222 170.821026 
 127.209444 35.781222 173.647253 
 127.209556 35.781222 181.223393 
 127.209667 35.781222 189.549455 
 127.209889 35.781222 191.836790 
 127.210111 35.781222 210.018824 
 127.210222 35.781222 211.939514 
 127.210333 35.781222 212.041034 
 127.210444 35.781222 211.112930 
 127.209333 35.781333 171.896713 
 127.209444 35.781333 176.841892 
 127.209556 35.781333 186.849511 
 127.209667 35.781333 193.406124 
 127.209889 35.781333 194.951942 
 127.210111 35.781333 210.658357 
 127.210222 35.781333 211.970487 
 127.210333 35.781333 211.614291 
 127.210444 35.781333 210.406158 
 127.209333 35.781444 173.573004 
 127.209444 35.781444 181.792426 
 127.209556 35.781444 191.806302 
 127.209667 35.781444 196.165188 
 127.209889 35.781444 198.266345 
 127.210111 35.781444 209.805181 
 127.210222 35.781444 211.161070 
 127.210333 35.781444 210.780384 
 127.210444 35.781444 209.688874 
 127.209444 35.781444 181.792426 
 127.209556 35.781444 191.806302 
 127.209667 35.781444 196.165188 
 127.209778 35.781444 197.330636 
 127.210000 35.781444 202.761126 
 127.210222 35.781444 211.161070 
 127.210333 35.781444 210.780384 
 127.210444 35.781444 209.688874 
 127.210556 35.781444 207.719650 
 127.209444 35.781555 187.364322 
 127.209556 35.781555 194.910022 
 127.209667 35.781555 197.607885 
 127.209778 35.781555 199.145355 
 127.210000 35.781555 201.423526 
 127.210222 35.781555 208.344969 
 127.210333 35.781555 209.294883 
 127.210444 35.781555 208.883050 
 127.210556 35.781555 205.634132 
 127.209444 35.781667 191.870806 
 127.209556 35.781667 196.542812 
 127.209667 35.781667 198.349943 
 127.209778 35.781667 199.786352 
 127.210000 35.781667 198.496030 
 127.210222 35.781667 201.278794 
 127.210333 35.781667 206.567431 
 127.210444 35.781667 207.686545 
 127.210556 35.781667 202.081748 
 127.209556 35.781667 196.542812 
 127.209667 35.781667 198.349943 
 127.209778 35.781667 199.786352 
 127.209889 35.781667 199.780367 
 127.210111 35.781667 197.511071 
 127.210333 35.781667 206.567431 
 127.210444 35.781667 207.686545 
 127.210556 35.781667 202.081748 
 127.210667 35.781667 188.333600 
 127.209556 35.781778 197.385459 
 127.209667 35.781778 198.789624 
 127.209778 35.781778 199.533265 
 127.209889 35.781778 197.794504 
 127.210111 35.781778 186.506023 
 127.210333 35.781778 201.662139 
 127.210444 35.781778 205.574477 
 127.210556 35.781778 196.911838 
 127.210667 35.781778 183.643181 
 127.209556 35.781889 197.889139 
 127.209667 35.781889 198.978858 
 127.209778 35.781889 197.835765 
 127.209889 35.781889 192.557884 
 127.210111 35.781889 178.144653 
 127.210333 35.781889 194.148118 
 127.210444 35.781889 201.861157 
 127.210556 35.781889 190.999988 
 127.210667 35.781889 180.788140 
 127.209667 35.781889 198.978858 
 127.209778 35.781889 197.835765 
 127.209889 35.781889 192.557884 
 127.210000 35.781889 185.150430 
 127.210222 35.781889 180.482616 
 127.210444 35.781889 201.861157 
 127.210556 35.781889 190.999988 
 127.210667 35.781889 180.788140 
 127.210778 35.781889 178.895620 
 127.209667 35.782000 198.562005 
 127.209778 35.782000 193.338379 
 127.209889 35.782000 183.033735 
 127.210000 35.782000 175.097738 
 127.210222 35.782000 175.206082 
 127.210444 35.782000 196.054424 
 127.210556 35.782000 185.819217 
 127.210667 35.782000 179.407102 
 127.210778 35.782000 179.869658 
 127.209667 35.782111 196.664764 
 127.209778 35.782111 185.110056 
 127.209889 35.782111 171.589969 
 127.210000 35.782111 166.242479 
 127.210222 35.782111 172.863318 
 127.210444 35.782111 188.697381 
 127.210556 35.782111 182.378815 
 127.210667 35.782111 179.207078 
 127.210778 35.782111 181.960468 
 127.209778 35.782111 185.110056 
 127.209889 35.782111 171.589969 
 127.210000 35.782111 166.242479 
 127.210111 35.782111 170.167932 
 127.210333 35.782111 178.759512 
 127.210556 35.782111 182.378815 
 127.210667 35.782111 179.207078 
 127.210778 35.782111 181.960468 
 127.210889 35.782111 187.488899 
 127.209778 35.782222 174.751739 
 127.209889 35.782222 162.338432 
 127.210000 35.782222 160.308208 
 127.210111 35.782222 167.973500 
 127.210333 35.782222 174.994651 
 127.210556 35.782222 181.059692 
 127.210667 35.782222 180.356665 
 127.210778 35.782222 184.731946 
 127.210889 35.782222 189.069194 
 127.209778 35.782333 165.647355 
 127.209889 35.782333 156.722768 
 127.210000 35.782333 157.168094 
 127.210111 35.782333 166.264834 
 127.210333 35.782333 173.750082 
 127.210556 35.782333 182.189878 
 127.210667 35.782333 183.310142 
 127.210778 35.782333 187.325424 
 127.210889 35.782333 190.410746 
 127.209889 35.782333 156.722768 
 127.210000 35.782333 157.168094 
 127.210111 35.782333 166.264834 
 127.210222 35.782333 170.879883 
 127.210444 35.782333 178.624168 
 127.210667 35.782333 183.310142 
 127.210778 35.782333 187.325424 
 127.210889 35.782333 190.410746 
 127.211000 35.782333 195.255684 
 127.209889 35.782444 153.884793 
 127.210000 35.782444 156.324144 
 127.210111 35.782444 165.061314 
 127.210222 35.782444 169.860926 
 127.210444 35.782444 178.154373 
 127.210667 35.782444 187.420578 
 127.210778 35.782444 189.424820 
 127.210889 35.782444 192.304094 
 127.211000 35.782444 199.984216 
 127.209889 35.782556 152.973317 
 127.210000 35.782556 157.548500 
 127.210111 35.782556 164.466052 
 127.210222 35.782556 168.804650 
 127.210444 35.782556 178.512377 
 127.210667 35.782556 190.565975 
 127.210778 35.782556 191.346367 
 127.210889 35.782556 195.595317 
 127.211000 35.782556 205.528780 
 127.210000 35.782556 157.548500 
 127.210111 35.782556 164.466052 
 127.210222 35.782556 168.804650 
 127.210333 35.782556 174.098069 
 127.210556 35.782556 186.691682 
 127.210778 35.782556 191.346367 
 127.210889 35.782556 195.595317 
 127.211000 35.782556 205.528780 
 127.211111 35.782556 212.640243 
 127.210000 35.782667 159.997820 
 127.210111 35.782667 164.297534 
 127.210222 35.782667 168.124542 
 127.210333 35.782667 174.429064 
 127.210556 35.782667 187.797980 
 127.210778 35.782667 193.446744 
 127.210889 35.782667 200.522134 
 127.211000 35.782667 210.005729 
 127.211111 35.782667 214.263311 
 127.210000 35.782778 162.103638 
 127.210111 35.782778 164.321156 
 127.210222 35.782778 168.134609 
 127.210333 35.782778 175.209758 
 127.210556 35.782778 188.709628 
 127.210778 35.782778 195.791126 
 127.210889 35.782778 205.770535 
 127.211000 35.782778 212.700062 
 127.211111 35.782778 215.803444 
 127.210000 35.782889 163.225562 
 127.210111 35.782889 164.544344 
 127.210222 35.782889 169.404370 
 127.210333 35.782889 177.280106 
 127.210556 35.782889 189.834153 
 127.210778 35.782889 198.564791 
 127.210889 35.782889 209.735401 
 127.211000 35.782889 214.254070 
 127.211111 35.782889 217.701528 
 127.210111 35.782889 164.544344 
 127.210222 35.782889 169.404370 
 127.210333 35.782889 177.280106 
 127.210444 35.782889 181.652541 
 127.210667 35.782889 193.902725 
 127.210889 35.782889 209.735401 
 127.211000 35.782889 214.254070 
 127.211111 35.782889 217.701528 
 127.211222 35.782889 221.631156 
 127.210111 35.783000 165.251255 
 127.210222 35.783000 172.837960 
 127.210333 35.783000 180.985309 
 127.210444 35.783000 184.410189 
 127.210667 35.783000 195.845293 
 127.210889 35.783000 212.551673 
 127.211000 35.783000 215.516580 
 127.211111 35.783000 219.671817 
 127.211222 35.783000 222.736614 
 127.210111 35.783111 167.067566 
 127.210222 35.783111 178.126001 
 127.210333 35.783111 184.686653 
 127.210444 35.783111 187.893188 
 127.210667 35.783111 200.050359 
 127.210889 35.783111 214.938199 
 127.211000 35.783111 216.870564 
 127.211111 35.783111 221.186108 
 127.211222 35.783111 223.421935 
 127.210222 35.783111 178.126001 
 127.210333 35.783111 184.686653 
 127.210444 35.783111 187.893188 
 127.210556 35.783111 195.561772 
 127.210778 35.783111 207.920279 
 127.211000 35.783111 216.870564 
 127.211111 35.783111 221.186108 
 127.211222 35.783111 223.421935 
 127.211333 35.783111 225.934816 
 127.210222 35.783222 182.893616 
 127.210333 35.783222 187.055954 
 127.210444 35.783222 191.536080 
 127.210556 35.783222 201.801971 
 127.210778 35.783222 212.914835 
 127.211000 35.783222 218.089271 
 127.211111 35.783222 222.140519 
 127.211222 35.783222 224.093747 
 127.211333 35.783222 228.183992 
 127.210222 35.783333 185.752199 
 127.210333 35.783333 188.662893 
 127.210444 35.783333 195.732368 
 127.210556 35.783333 207.894578 
 127.210778 35.783333 215.870912 
 127.211000 35.783333 218.826485 
 127.211111 35.783333 222.748219 
 127.211222 35.783333 225.025472 
 127.211333 35.783333 230.961073 
 127.210333 35.783333 188.662893 
 127.210444 35.783333 195.732368 
 127.210556 35.783333 207.894578 
 127.210667 35.783333 211.928754 
 127.210889 35.783333 217.777306 
 127.211111 35.783333 222.748219 
 127.211222 35.783333 225.025472 
 127.211333 35.783333 230.961073 
 127.211444 35.783333 242.068993 
 127.210333 35.783444 190.595439 
 127.210444 35.783444 200.923871 
 127.210556 35.783444 211.640695 
 127.210667 35.783444 214.551643 
 127.210889 35.783444 218.357418 
 127.211111 35.783444 223.351013 
 127.211222 35.783444 226.311288 
 127.211333 35.783444 233.858933 
 127.211444 35.783444 243.249421 
 127.210333 35.783556 193.909112 
 127.210444 35.783556 206.327030 
 127.210556 35.783556 213.480533 
 127.210667 35.783556 215.683377 
 127.210889 35.783556 219.146003 
 127.211111 35.783556 224.476016 
 127.211222 35.783556 228.053456 
 127.211333 35.783556 236.684106 
 127.211444 35.783556 243.653034 
 127.210444 35.783556 206.327030 
 127.210556 35.783556 213.480533 
 127.210667 35.783556 215.683377 
 127.210778 35.783556 218.303638 
 127.211000 35.783556 220.239348 
 127.211222 35.783556 228.053456 
 127.211333 35.783556 236.684106 
 127.211444 35.783556 243.653034 
 127.211556 35.783556 240.473475 
 127.210444 35.783667 210.495264 
 127.210556 35.783667 214.442402 
 127.210667 35.783667 216.827401 
 127.210778 35.783667 220.346428 
 127.211000 35.783667 222.604538 
 127.211222 35.783667 230.633986 
 127.211333 35.783667 239.229225 
 127.211444 35.783667 243.024585 
 127.211556 35.783667 236.653190 
 127.210444 35.783778 212.949938 
 127.210556 35.783778 215.315961 
 127.210667 35.783778 219.281587 
 127.210778 35.783778 224.964727 
 127.211000 35.783778 227.612283 
 127.211222 35.783778 234.503611 
 127.211333 35.783778 241.060982 
 127.211444 35.783778 240.955459 
 127.211556 35.783778 231.962816 
 127.210556 35.783778 215.315961 
 127.210667 35.783778 219.281587 
 127.210778 35.783778 224.964727 
 127.210889 35.783778 225.623077 
 127.211111 35.783778 232.348049 
 127.211333 35.783778 241.060982 
 127.211444 35.783778 240.955459 
 127.211556 35.783778 231.962816 
 127.211667 35.783778 222.865623 
 127.210556 35.783889 216.902821 
 127.210667 35.783889 224.399283 
 127.210778 35.783889 232.508241 
 127.210889 35.783889 232.953004 
 127.211111 35.783889 238.175565 
 127.211333 35.783889 241.546349 
 127.211444 35.783889 237.142387 
 127.211556 35.783889 227.263615 
 127.211667 35.783889 220.269117 
 127.210556 35.784000 220.390110 
 127.210667 35.784000 232.245049 
 127.210778 35.784000 240.034150 
 127.210889 35.784000 240.003388 
 127.211111 35.784000 241.266002 
 127.211333 35.784000 240.232872 
 127.211444 35.784000 231.864127 
 127.211556 35.784000 223.105608 
 127.211667 35.784000 217.543630 
 127.210556 35.784111 226.894777 
 127.210667 35.784111 239.874186 
 127.210778 35.784111 244.659789 
 127.210889 35.784111 244.027867 
 127.211111 35.784111 241.644452 
 127.211333 35.784111 237.452411 
 127.211444 35.784111 226.074293 
 127.211556 35.784111 219.238379 
 127.211667 35.784111 214.023711 
 127.210667 35.784111 239.874186 
 127.210778 35.784111 244.659789 
 127.210889 35.784111 244.027867 
 127.211000 35.784111 241.991314 
 127.211222 35.784111 241.424583 
 127.211444 35.784111 226.074293 
 127.211556 35.784111 219.238379 
 127.211667 35.784111 214.023711 
 127.211778 35.784111 205.226562 
 127.210667 35.784222 244.650396 
 127.210778 35.784222 246.703730 
 127.210889 35.784222 245.407791 
 127.211000 35.784222 241.715561 
 127.211222 35.784222 239.595518 
 127.211444 35.784222 220.288174 
 127.211556 35.784222 214.802182 
 127.211667 35.784222 209.233503 
 127.211778 35.784222 200.281930 
 127.210667 35.784333 246.839707 
 127.210778 35.784333 247.361149 
 127.210889 35.784333 245.067403 
 127.211000 35.784333 239.316250 
 127.211222 35.784333 235.974616 
 127.211444 35.784333 214.100936 
 127.211556 35.784333 209.130866 
 127.211667 35.784333 203.501449 
 127.211778 35.784333 195.781742 
 127.210778 35.784333 247.361149 
 127.210889 35.784333 245.067403 
 127.211000 35.784333 239.316250 
 127.211111 35.784333 236.938279 
 127.211333 35.784333 229.401986 
 127.211556 35.784333 209.130866 
 127.211667 35.784333 203.501449 
 127.211778 35.784333 195.781742 
 127.211889 35.784333 187.930048 
 127.210778 35.784444 247.268718 
 127.210889 35.784444 243.120154 
 127.211000 35.784444 234.586168 
 127.211111 35.784444 231.559197 
 127.211333 35.784444 223.325062 
 127.211556 35.784444 202.737260 
 127.211667 35.784444 198.156120 
 127.211778 35.784444 192.328440 
 127.211889 35.784444 185.107855 
 127.210778 35.784556 246.455566 
 127.210889 35.784556 238.924360 
 127.211000 35.784556 227.698626 
 127.211111 35.784556 224.586151 
 127.211333 35.784556 216.049019 
 127.211556 35.784556 197.262982 
 127.211667 35.784556 194.362536 
 127.211778 35.784556 189.810480 
 127.211889 35.784556 182.504090 
 127.210889 35.784556 238.924360 
 127.211000 35.784556 227.698626 
 127.211111 35.784556 224.586151 
 127.211222 35.784556 223.087402 
 127.211444 35.784556 200.885710 
 127.211667 35.784556 194.362536 
 127.211778 35.784556 189.810480 
 127.211889 35.784556 182.504090 
 127.212000 35.784556 175.909299 
 127.210889 35.784667 231.934525 
 127.211000 35.784667 220.290693 
 127.211111 35.784667 217.799762 
 127.211222 35.784667 216.059939 
 127.211444 35.784667 195.619710 
 127.211667 35.784667 192.115474 
 127.211778 35.784667 187.795074 
 127.211889 35.784667 180.181003 
 127.212000 35.784667 174.452223 
 127.210889 35.784778 223.292565 
 127.211000 35.784778 214.439668 
 127.211111 35.784778 212.703251 
 127.211222 35.784778 210.320323 
 127.211444 35.784778 190.670201 
 127.211667 35.784778 190.640983 
 127.211778 35.784778 185.906089 
 127.211889 35.784778 178.169839 
 127.212000 35.784778 173.228786 
 127.211000 35.784778 214.439668 
 127.211111 35.784778 212.703251 
 127.211222 35.784778 210.320323 
 127.211333 35.784778 201.582363 
 127.211556 35.784778 191.116126 
 127.211778 35.784778 185.906089 
 127.211889 35.784778 178.169839 
 127.212000 35.784778 173.228786 
 127.212111 35.784778 170.125275 
 127.211000 35.784889 210.840671 
 127.211111 35.784889 209.353672 
 127.211222 35.784889 205.461122 
 127.211333 35.784889 194.073289 
 127.211556 35.784889 188.200937 
 127.211778 35.784889 183.922124 
 127.211889 35.784889 176.427095 
 127.212000 35.784889 171.970935 
 127.212111 35.784889 167.951025 
 127.211000 35.785000 208.821433 
 127.211111 35.785000 206.806729 
 127.211222 35.785000 200.185377 
 127.211333 35.785000 186.154774 
 127.211556 35.785000 183.567663 
 127.211778 35.785000 181.545843 
 127.211889 35.785000 174.754410 
 127.212000 35.785000 170.307447 
 127.212111 35.785000 164.627000 
 127.211111 35.785000 206.806729 
 127.211222 35.785000 200.185377 
 127.211333 35.785000 186.154774 
 127.211444 35.785000 178.573958 
 127.211667 35.785000 186.437617 
 127.211889 35.785000 174.754410 
 127.212000 35.785000 170.307447 
 127.212111 35.785000 164.627000 
 127.212222 35.785000 156.045401 
 127.211111 35.785111 203.937002 
 127.211222 35.785111 193.565138 
 127.211333 35.785111 179.031896 
 127.211444 35.785111 173.305952 
 127.211667 35.785111 181.066035 
 127.211889 35.785111 172.742890 
 127.212000 35.785111 167.775450 
 127.212111 35.785111 160.178908 
 127.212222 35.785111 151.791397 
 127.211111 35.785222 199.712176 
 127.211222 35.785222 185.974994 
 127.211333 35.785222 173.829664 
 127.211444 35.785222 169.721843 
 127.211667 35.785222 171.439085 
 127.211889 35.785222 169.634703 
 127.212000 35.785222 163.986223 
 127.212111 35.785222 155.367887 
 127.212222 35.785222 148.675570 
 127.211111 35.785333 193.541243 
 127.211222 35.785333 178.955304 
 127.211333 35.785333 170.571061 
 127.211444 35.785333 167.315607 
 127.211667 35.785333 159.353519 
 127.211889 35.785333 164.357716 
 127.212000 35.785333 159.048730 
 127.212111 35.785333 151.239200 
 127.212222 35.785333 146.589603 
 127.211222 35.785333 178.955304 
 127.211333 35.785333 170.571061 
 127.211444 35.785333 167.315607 
 127.211556 35.785333 163.653855 
 127.211778 35.785333 161.416326 
 127.212000 35.785333 159.048730 
 127.212111 35.785333 151.239200 
 127.212222 35.785333 146.589603 
 127.212333 35.785333 143.457028 
 127.211222 35.785444 173.824661 
 127.211333 35.785444 168.635671 
 127.211444 35.785444 165.332606 
 127.211556 35.785444 158.239172 
 127.211778 35.785444 150.184553 
 127.212000 35.785444 153.910260 
 127.212111 35.785444 148.331397 
 127.212222 35.785444 145.087990 
 127.212333 35.785444 141.576985 
 127.211222 35.785556 170.657074 
 127.211333 35.785556 167.340833 
 127.211444 35.785556 163.153254 
 127.211556 35.785556 153.344041 
 127.211778 35.785556 142.998165 
 127.212000 35.785556 149.687259 
 127.212111 35.785556 146.468917 
 127.212222 35.785556 143.701927 
 127.212333 35.785556 139.330610 
 127.211333 35.785556 167.340833 
 127.211444 35.785556 163.153254 
 127.211556 35.785556 153.344041 
 127.211667 35.785556 143.991687 
 127.211889 35.785556 148.839153 
 127.212111 35.785556 146.468917 
 127.212222 35.785556 143.701927 
 127.212333 35.785556 139.330610 
 127.212444 35.785556 134.398867 
 127.211333 35.785667 166.176981 
 127.211444 35.785667 160.375930 
 127.211556 35.785667 148.947720 
 127.211667 35.785667 141.090399 
 127.211889 35.785667 143.891325 
 127.212111 35.785667 145.232520 
 127.212222 35.785667 142.111091 
 127.212333 35.785667 136.979098 
 127.212444 35.785667 132.896444 
 127.211333 35.785778 164.744795 
 127.211444 35.785778 156.825855 
 127.211556 35.785778 145.268896 
 127.211667 35.785778 139.692845 
 127.211889 35.785778 142.250519 
 127.212111 35.785778 144.283027 
 127.212222 35.785778 140.219167 
 127.212333 35.785778 134.952516 
 127.212444 35.785778 132.115532 
 127.211444 35.785778 156.825855 
 127.211556 35.785778 145.268896 
 127.211667 35.785778 139.692845 
 127.211778 35.785778 139.380578 
 127.212000 35.785778 145.507342 
 127.212222 35.785778 140.219167 
 127.212333 35.785778 134.952516 
 127.212444 35.785778 132.115532 
 127.212556 35.785778 132.211872 
 127.211444 35.785889 152.695707 
 127.211556 35.785889 142.528126 
 127.211667 35.785889 139.178767 
 127.211778 35.785889 139.850918 
 127.212000 35.785889 145.458838 
 127.212222 35.785889 138.285758 
 127.212333 35.785889 133.656222 
 127.212444 35.785889 132.153370 
 127.212556 35.785889 133.987782 
 127.211444 35.786000 148.499949 
 127.211556 35.786000 140.749335 
 127.211667 35.786000 139.309163 
 127.211778 35.786000 141.039609 
 127.212000 35.786000 146.495711 
 127.212222 35.786000 136.982802 
 127.212333 35.786000 133.499386 
 127.212444 35.786000 133.409426 
 127.212556 35.786000 137.049194 
 127.211556 35.786000 140.749335 
 127.211667 35.786000 139.309163 
 127.211778 35.786000 141.039609 
 127.211889 35.786000 144.253696 
 127.212111 35.786000 143.678023 
 127.212333 35.786000 133.499386 
 127.212444 35.786000 133.409426 
 127.212556 35.786000 137.049194 
 127.212667 35.786000 141.802081 
 127.211556 35.786111 139.847263 
 127.211667 35.786111 140.024326 
 127.211778 35.786111 142.706432 
 127.211889 35.786111 145.961648 
 127.212111 35.786111 145.625521 
 127.212333 35.786111 135.315752 
 127.212444 35.786111 136.780667 
 127.212556 35.786111 140.954352 
 127.212667 35.786111 143.451018 
 127.211556 35.786222 139.714737 
 127.211667 35.786222 141.284122 
 127.211778 35.786222 144.545793 
 127.211889 35.786222 147.526012 
 127.212111 35.786222 150.284269 
 127.212333 35.786222 140.633328 
 127.212444 35.786222 143.280247 
 127.212556 35.786222 145.251816 
 127.212667 35.786222 144.919375 
 127.211667 35.786222 141.284122 
 127.211778 35.786222 144.545793 
 127.211889 35.786222 147.526012 
 127.212000 35.786222 149.964121 
 127.212222 35.786222 142.206983 
 127.212444 35.786222 143.280247 
 127.212556 35.786222 145.251816 
 127.212667 35.786222 144.919375 
 127.212778 35.786222 145.656193 
 127.211667 35.786333 142.949272 
 127.211778 35.786333 146.265998 
 127.211889 35.786333 149.034322 
 127.212000 35.786333 152.723165 
 127.212222 35.786333 152.565687 
 127.212444 35.786333 152.451757 
 127.212556 35.786333 150.106003 
 127.212667 35.786333 147.038062 
 127.212778 35.786333 148.937758 
 127.211667 35.786444 144.733798 
 127.211778 35.786444 147.752185 
 127.211889 35.786444 150.884438 
 127.212000 35.786444 157.116052 
 127.212222 35.786444 165.509746 
 127.212444 35.786444 161.297046 
 127.212556 35.786444 155.815015 
 127.212667 35.786444 150.828277 
 127.212778 35.786444 154.784736 
 127.211667 35.786556 146.361941 
 127.211778 35.786556 149.153695 
 127.211889 35.786556 153.682449 
 127.212000 35.786556 163.536195 
 127.212222 35.786556 175.582743 
 127.212444 35.786556 167.298486 
 127.212556 35.786556 161.888325 
 127.212667 35.786556 156.719204 
 127.212778 35.786556 161.132610 
 127.211778 35.786556 149.153695 
 127.211889 35.786556 153.682449 
 127.212000 35.786556 163.536195 
 127.212111 35.786556 175.382924 
 127.212333 35.786556 168.671207 
 127.212556 35.786556 161.888325 
 127.212667 35.786556 156.719204 
 127.212778 35.786556 161.132610 
 127.212889 35.786556 165.934206 
 127.211778 35.786667 150.801645 
 127.211889 35.786667 157.996540 
 127.212000 35.786667 171.171139 
 127.212111 35.786667 182.241654 
 127.212333 35.786667 173.347312 
 127.212556 35.786667 166.934028 
 127.212667 35.786667 162.963028 
 127.212778 35.786667 165.378700 
 127.212889 35.786667 168.601786 
 127.211778 35.786778 153.141230 
 127.211889 35.786778 163.955678 
 127.212000 35.786778 178.364568 
 127.212111 35.786778 186.943911 
 127.212333 35.786778 177.603660 
 127.212556 35.786778 170.419527 
 127.212667 35.786778 167.911148 
 127.212778 35.786778 168.319940 
 127.212889 35.786778 171.603372 
 127.211889 35.786778 163.955678 
 127.212000 35.786778 178.364568 
 127.212111 35.786778 186.943911 
 127.212222 35.786778 186.827334 
 127.212444 35.786778 172.935054 
 127.212667 35.786778 167.911148 
 127.212778 35.786778 168.319940 
 127.212889 35.786778 171.603372 
 127.213000 35.786778 178.379079 
 127.211889 35.786889 170.810323 
 127.212000 35.786889 183.898466 
 127.212111 35.786889 190.185920 
 127.212222 35.786889 191.738762 
 127.212444 35.786889 176.231350 
 127.212667 35.786889 173.151391 
 127.212778 35.786889 172.400622 
 127.212889 35.786889 175.563984 
 127.213000 35.786889 179.863359 
 127.211889 35.787000 177.278999 
 127.212000 35.787000 187.684231 
 127.212111 35.787000 192.914777 
 127.212222 35.787000 197.650601 
 127.212444 35.787000 182.917011 
 127.212667 35.787000 181.608096 
 127.212778 35.787000 179.991745 
 127.212889 35.787000 180.090902 
 127.213000 35.787000 180.773838 
 127.212000 35.787000 187.684231 
 127.212111 35.787000 192.914777 
 127.212222 35.787000 197.650601 
 127.212333 35.787000 193.938440 
 127.212556 35.787000 178.795051 
 127.212778 35.787000 179.991745 
 127.212889 35.787000 180.090902 
 127.213000 35.787000 180.773838 
 127.213111 35.787000 181.146251 
 127.212000 35.787111 190.303709 
 127.212111 35.787111 196.000881 
 127.212222 35.787111 204.300622 
 127.212333 35.787111 204.823790 
 127.212556 35.787111 188.088125 
 127.212778 35.787111 190.292575 
 127.212889 35.787111 184.714431 
 127.213000 35.787111 181.534639 
 127.213111 35.787111 181.441587 
 127.212000 35.787222 192.445921 
 127.212111 35.787222 199.995960 
 127.212222 35.787222 210.359683 
 127.212333 35.787222 213.000802 
 127.212556 35.787222 199.966198 
 127.212778 35.787222 198.286708 
 127.212889 35.787222 189.451100 
 127.213000 35.787222 182.507510 
 127.213111 35.787222 181.793069 
 127.212111 35.787222 199.995960 
 127.212222 35.787222 210.359683 
 127.212333 35.787222 213.000802 
 127.212444 35.787222 207.240165 
 127.212667 35.787222 200.211794 
 127.212889 35.787222 189.451100 
 127.213000 35.787222 182.507510 
 127.213111 35.787222 181.793069 
 127.213222 35.787222 182.055794 
 127.212111 35.787333 204.842577 
 127.212222 35.787333 214.851985 
 127.212333 35.787333 217.998889 
 127.212444 35.787333 217.734998 
 127.212667 35.787333 204.322203 
 127.212889 35.787333 194.282714 
 127.213000 35.787333 184.081645 
 127.213111 35.787333 182.204527 
 127.213222 35.787333 182.183600 
 127.212111 35.787444 209.748107 
 127.212222 35.787444 217.856537 
 127.212333 35.787444 221.447075 
 127.212444 35.787444 225.448309 
 127.212667 35.787444 207.285939 
 127.212889 35.787444 198.544355 
 127.213000 35.787444 186.672651 
 127.213111 35.787444 182.781139 
 127.213222 35.787444 182.418197 
 127.212222 35.787444 217.856537 
 127.212333 35.787444 221.447075 
 127.212444 35.787444 225.448309 
 127.212556 35.787444 220.762135 
 127.212778 35.787444 203.925764 
 127.213000 35.787444 186.672651 
 127.213111 35.787444 182.781139 
 127.213222 35.787444 182.418197 
 127.213333 35.787444 182.473001 
 127.212222 35.787556 220.113185 
 127.212333 35.787556 224.908378 
 127.212444 35.787556 231.448271 
 127.212556 35.787556 228.874499 
 127.212778 35.787556 205.043849 
 127.213000 35.787556 190.490970 
 127.213111 35.787556 183.790683 
 127.213222 35.787556 182.874823 
 127.213333 35.787556 182.835022 
 127.212222 35.787667 222.449428 
 127.212333 35.787667 229.021922 
 127.212444 35.787667 235.803600 
 127.212556 35.787667 234.498909 
 127.212778 35.787667 206.551783 
 127.213000 35.787667 194.804855 
 127.213111 35.787667 185.454883 
 127.213222 35.787667 183.610050 
 127.213333 35.787667 183.179935 
 127.212222 35.787778 225.552068 
 127.212333 35.787778 233.314524 
 127.212444 35.787778 238.450243 
 127.212556 35.787778 237.325678 
 127.212778 35.787778 208.868627 
 127.213000 35.787778 198.209878 
 127.213111 35.787778 187.475895 
 127.213222 35.787778 184.426448 
 127.213333 35.787778 183.216521 
 127.212333 35.787778 233.314524 
 127.212444 35.787778 238.450243 
 127.212556 35.787778 237.325678 
 127.212667 35.787778 223.321328 
 127.212889 35.787778 204.733144 
 127.213111 35.787778 187.475895 
 127.213222 35.787778 184.426448 
 127.213333 35.787778 183.216521 
 127.213444 35.787778 179.208587 
 127.212333 35.787889 236.773131 
 127.212444 35.787889 239.693730 
 127.212556 35.787889 237.787855 
 127.212667 35.787889 226.744977 
 127.212889 35.787889 205.644160 
 127.213111 35.787889 189.075820 
 127.213222 35.787889 184.970590 
 127.213333 35.787889 182.842490 
 127.213444 35.787889 178.374988 
 127.212333 35.788000 238.931204 
 127.212444 35.788000 239.892254 
 127.212556 35.788000 236.434798 
 127.212667 35.788000 227.380322 
 127.212889 35.788000 206.677340 
 127.213111 35.788000 189.949634 
 127.213222 35.788000 185.144912 
 127.213333 35.788000 182.194016 
 127.213444 35.788000 177.756242 
 127.212444 35.788000 239.892254 
 127.212556 35.788000 236.434798 
 127.212667 35.788000 227.380322 
 127.212778 35.788000 214.701966 
 127.213000 35.788000 201.207646 
 127.213222 35.788000 185.144912 
 127.213333 35.788000 182.194016 
 127.213444 35.788000 177.756242 
 127.213556 35.788000 176.400526 
 127.212444 35.788111 239.161907 
 127.212556 35.788111 233.948577 
 127.212667 35.788111 227.119437 
 127.212778 35.788111 217.745045 
 127.213000 35.788111 202.162375 
 127.213222 35.788111 185.103473 
 127.213333 35.788111 181.465198 
 127.213444 35.788111 177.396034 
 127.213556 35.788111 176.760727 
 127.212444 35.788222 237.452157 
 127.212556 35.788222 231.346661 
 127.212667 35.788222 226.905461 
 127.212778 35.788222 220.538979 
 127.213000 35.788222 204.218896 
 127.213222 35.788222 185.132303 
 127.213333 35.788222 180.966627 
 127.213444 35.788222 177.447248 
 127.213556 35.788222 177.624073 
 127.212556 35.788222 231.346661 
 127.212667 35.788222 226.905461 
 127.212778 35.788222 220.538979 
 127.212889 35.788222 211.103441 
 127.213111 35.788222 191.511942 
 127.213333 35.788222 180.966627 
 127.213444 35.788222 177.447248 
 127.213556 35.788222 177.624073 
 127.213667 35.788222 182.660848 
 127.212556 35.788333 229.403324 
 127.212667 35.788333 226.828927 
 127.212778 35.788333 222.774469 
 127.212889 35.788333 215.442737 
 127.213111 35.788333 194.652292 
 127.213333 35.788333 181.391846 
 127.213444 35.788333 178.307436 
 127.213556 35.788333 179.456133 
 127.213667 35.788333 187.100709 
 127.212556 35.788444 228.240038 
 127.212667 35.788444 226.777491 
 127.212778 35.788444 224.237025 
 127.212889 35.788444 220.111443 
 127.213111 35.788444 201.687409 
 127.213333 35.788444 183.930259 
 127.213444 35.788444 180.737202 
 127.213556 35.788444 182.896784 
 127.213667 35.788444 192.396460 
 127.212667 35.788444 226.777491 
 127.212778 35.788444 224.237025 
 127.212889 35.788444 220.111443 
 127.213000 35.788444 216.085462 
 127.213222 35.788444 188.713562 
 127.213444 35.788444 180.737202 
 127.213556 35.788444 182.896784 
 127.213667 35.788444 192.396460 
 127.213778 35.788444 200.593032 
 127.212667 35.788556 226.634444 
 127.212778 35.788556 224.895099 
 127.212889 35.788556 223.023034 
 127.213000 35.788556 221.082541 
 127.213222 35.788556 193.623721 
 127.213444 35.788556 185.320640 
 127.213556 35.788556 188.125866 
 127.213667 35.788556 197.123209 
 127.213778 35.788556 202.037402 
 127.212667 35.788667 226.299972 
 127.212778 35.788667 224.956681 
 127.212889 35.788667 224.074038 
 127.213000 35.788667 222.760565 
 127.213222 35.788667 197.386589 
 127.213444 35.788667 190.783064 
 127.213556 35.788667 193.780733 
 127.213667 35.788667 200.304403 
 127.213778 35.788667 202.902328 
 127.212778 35.788778 224.786654 
 127.212889 35.788778 224.221786 
 127.213000 35.788778 222.472380 
 127.213111 35.788778 213.049221 
 127.213333 35.788778 195.623679 
 127.213556 35.788778 198.001127 
 127.213667 35.788778 202.187774 
 127.213778 35.788778 203.684998 
 127.213889 35.788778 206.524323 
 127.212778 35.788889 224.605627 
 127.212889 35.788889 223.927640 
 127.213000 35.788889 220.853962 
 127.213111 35.788889 211.051189 
 127.213333 35.788889 196.789379 
 127.213556 35.788889 200.701312 
 127.213667 35.788889 203.714044 
 127.213778 35.788889 204.977085 
 127.213889 35.788889 210.192004 
 127.212778 35.789000 224.429992 
 127.212889 35.789000 223.177873 
 127.213000 35.789000 218.033876 
 127.213111 35.789000 208.976568 
 127.213333 35.789000 197.682617 
 127.213556 35.789000 203.320247 
 127.213667 35.789000 206.148656 
 127.213778 35.789000 207.672358 
 127.213889 35.789000 216.375548 
 127.212889 35.789000 223.177873 
 127.213000 35.789000 218.033876 
 127.213111 35.789000 208.976568 
 127.213222 35.789000 201.051929 
 127.213444 35.789000 198.265351 
 127.213667 35.789000 206.148656 
 127.213778 35.789000 207.672358 
 127.213889 35.789000 216.375548 
 127.214000 35.789000 236.155546 
 127.212889 35.789111 221.750809 
 127.213000 35.789111 214.534983 
 127.213111 35.789111 207.528392 
 127.213222 35.789111 202.504987 
 127.213444 35.789111 200.423662 
 127.213667 35.789111 211.175586 
 127.213778 35.789111 213.022760 
 127.213889 35.789111 224.905591 
 127.214000 35.789111 243.179185 
 127.212889 35.789222 219.490397 
 127.213000 35.789222 211.355465 
 127.213111 35.789222 206.791969 
 127.213222 35.789222 204.399357 
 127.213444 35.789222 205.182121 
 127.213667 35.789222 219.856250 
 127.213778 35.789222 221.555847 
 127.213889 35.789222 233.897060 
 127.214000 35.789222 247.596560 
 127.213000 35.789222 211.355465 
 127.213111 35.789222 206.791969 
 127.213222 35.789222 204.399357 
 127.213333 35.789222 202.670168 
 127.213556 35.789222 216.281964 
 127.213778 35.789222 221.555847 
 127.213889 35.789222 233.897060 
 127.214000 35.789222 247.596560 
 127.214111 35.789222 251.809930 
 127.213000 35.789333 209.105839 
 127.213111 35.789333 206.614052 
 127.213222 35.789333 206.795360 
 127.213333 35.789333 208.103412 
 127.213556 35.789333 226.760297 
 127.213778 35.789333 231.295483 
 127.213889 35.789333 241.137260 
 127.214000 35.789333 250.110208 
 127.214111 35.789333 252.380553 
 127.213000 35.789445 207.778031 
 127.213111 35.789445 206.921328 
 127.213222 35.789445 209.580580 
 127.213333 35.789445 212.988892 
 127.213556 35.789445 234.804374 
 127.213778 35.789445 238.929121 
 127.213889 35.789445 245.862659 
 127.214000 35.789445 251.597205 
 127.214111 35.789445 252.756621 
 127.213111 35.789445 206.921328 
 127.213222 35.789445 209.580580 
 127.213333 35.789445 212.988892 
 127.213444 35.789445 219.258270 
 127.213667 35.789445 238.086535 
 127.213889 35.789445 245.862659 
 127.214000 35.789445 251.597205 
 127.214111 35.789445 252.756621 
 127.214222 35.789445 252.256397 
 127.213111 35.789556 207.769248 
 127.213222 35.789556 212.253927 
 127.213333 35.789556 215.720841 
 127.213444 35.789556 222.428447 
 127.213667 35.789556 242.459406 
 127.213889 35.789556 248.796982 
 127.214000 35.789556 252.859513 
 127.214111 35.789556 253.222024 
 127.214222 35.789556 251.435896 
 127.213111 35.789667 209.229971 
 127.213222 35.789667 214.330637 
 127.213333 35.789667 217.225930 
 127.213444 35.789667 224.076490 
 127.213667 35.789667 244.422894 
 127.213889 35.789667 251.202604 
 127.214000 35.789667 254.707879 
 127.214111 35.789667 254.127322 
 127.214222 35.789667 249.982303 
 127.213222 35.789667 214.330637 
 127.213333 35.789667 217.225930 
 127.213444 35.789667 224.076490 
 127.213556 35.789667 239.862022 
 127.213778 35.789667 245.794819 
 127.214000 35.789667 254.707879 
 127.214111 35.789667 254.127322 
 127.214222 35.789667 249.982303 
 127.214333 35.789667 244.121595 
 127.213222 35.789778 215.826466 
 127.213333 35.789778 218.742845 
 127.213444 35.789778 225.747835 
 127.213556 35.789778 239.175915 
 127.213778 35.789778 247.400992 
 127.214000 35.789778 257.632015 
 127.214111 35.789778 255.684488 
 127.214222 35.789778 248.348358 
 127.214333 35.789778 242.724543 
 127.213222 35.789889 217.229760 
 127.213333 35.789889 221.115222 
 127.213444 35.789889 227.641033 
 127.213556 35.789889 237.563280 
 127.213778 35.789889 249.292125 
 127.214000 35.789889 260.926320 
 127.214111 35.789889 257.442719 
 127.214222 35.789889 247.193974 
 127.214333 35.789889 242.065435 
 127.213222 35.790000 219.200838 
 127.213333 35.790000 224.240199 
 127.213444 35.790000 229.185112 
 127.213556 35.790000 236.522010 
 127.213778 35.790000 252.147895 
 127.214000 35.790000 263.252635 
 127.214111 35.790000 258.588007 
 127.214222 35.790000 246.566539 
 127.214333 35.790000 241.689753 
 127.213333 35.790000 224.240199 
 127.213444 35.790000 229.185112 
 127.213556 35.790000 236.522010 
 127.213667 35.790000 246.464012 
 127.213889 35.790000 261.219146 
 127.214111 35.790000 258.588007 
 127.214222 35.790000 246.566539 
 127.214333 35.790000 241.689753 
 127.214444 35.790000 239.673860 
 127.213333 35.790111 226.994145 
 127.213444 35.790111 230.287983 
 127.213556 35.790111 237.498512 
 127.213667 35.790111 249.402208 
 127.213889 35.790111 263.237276 
 127.214111 35.790111 258.658582 
 127.214222 35.790111 246.075487 
 127.214333 35.790111 241.264593 
 127.214444 35.790111 237.611014 
 127.213333 35.790222 228.703323 
 127.213444 35.790222 231.417077 
 127.213556 35.790222 240.862996 
 127.213667 35.790222 252.924731 
 127.213889 35.790222 263.520227 
 127.214111 35.790222 256.928411 
 127.214222 35.790222 245.158008 
 127.214333 35.790222 240.448881 
 127.214444 35.790222 233.781647 
 127.213444 35.790222 231.417077 
 127.213556 35.790222 240.862996 
 127.213667 35.790222 252.924731 
 127.213778 35.790222 257.301833 
 127.214000 35.790222 263.369914 
 127.214222 35.790222 245.158008 
 127.214333 35.790222 240.448881 
 127.214444 35.790222 233.781647 
 127.214556 35.790222 218.669362 
 127.213444 35.790333 233.206943 
 127.213556 35.790333 245.730817 
 127.213667 35.790333 255.196973 
 127.213778 35.790333 257.268749 
 127.214000 35.790333 259.547891 
 127.214222 35.790333 242.848357 
 127.214333 35.790333 238.688436 
 127.214444 35.790333 227.957271 
 127.214556 35.790333 213.643665 
 127.213444 35.790445 236.297903 
 127.213556 35.790445 250.404267 
 127.213667 35.790445 256.107484 
 127.213778 35.790445 255.798804 
 127.214000 35.790445 250.788091 
 127.214222 35.790445 238.008332 
 127.214333 35.790445 235.184707 
 127.214444 35.790445 221.418346 
 127.214556 35.790445 210.781437 
 127.213556 35.790445 250.404267 
 127.213667 35.790445 256.107484 
 127.213778 35.790445 255.798804 
 127.213889 35.790445 255.901808 
 127.214111 35.790445 241.979108 
 127.214333 35.790445 235.184707 
 127.214444 35.790445 221.418346 
 127.214556 35.790445 210.781437 
 127.214667 35.790445 208.385862 
 127.213556 35.790556 253.650086 
 127.213667 35.790556 255.943712 
 127.213778 35.790556 253.209236 
 127.213889 35.790556 249.029097 
 127.214111 35.790556 232.285955 
 127.214333 35.790556 229.817861 
 127.214444 35.790556 216.473818 
 127.214556 35.790556 209.547755 
 127.214667 35.790556 208.492556 
 127.213556 35.790667 255.279131 
 127.213667 35.790667 254.698132 
 127.213778 35.790667 250.268818 
 127.213889 35.790667 244.884719 
 127.214111 35.790667 226.769195 
 127.214333 35.790667 224.993406 
 127.214444 35.790667 214.629061 
 127.214556 35.790667 209.625934 
 127.214667 35.790667 209.543133 
 127.213667 35.790667 254.698132 
 127.213778 35.790667 250.268818 
 127.213889 35.790667 244.884719 
 127.214000 35.790667 232.615995 
 127.214222 35.790667 226.719315 
 127.214444 35.790667 214.629061 
 127.214556 35.790667 209.625934 
 127.214667 35.790667 209.543133 
 127.214778 35.790667 215.230484 
 127.213667 35.790778 252.441917 
 127.213778 35.790778 248.060931 
 127.213889 35.790778 243.439676 
 127.214000 35.790778 230.327368 
 127.214222 35.790778 224.593686 
 127.214444 35.790778 215.989857 
 127.214556 35.790778 211.571155 
 127.214667 35.790778 212.798866 
 127.214778 35.790778 220.591957 
 127.213667 35.790889 249.911679 
 127.213778 35.790889 246.801617 
 127.213889 35.790889 242.816574 
 127.214000 35.790889 230.624830 
 127.214222 35.790889 224.185111 
 127.214444 35.790889 219.346561 
 127.214556 35.790889 216.666042 
 127.214667 35.790889 219.406675 
 127.214778 35.790889 224.903093 
 127.213778 35.790889 246.801617 
 127.213889 35.790889 242.816574 
 127.214000 35.790889 230.624830 
 127.214111 35.790889 224.704030 
 127.214333 35.790889 223.626087 
 127.214556 35.790889 216.666042 
 127.214667 35.790889 219.406675 
 127.214778 35.790889 224.903093 
 127.214889 35.790889 227.445934 
 127.213778 35.791000 246.034369 
 127.213889 35.791000 241.761535 
 127.214000 35.791000 231.999830 
 127.214111 35.791000 226.388706 
 127.214333 35.791000 224.356020 
 127.214556 35.791000 224.002452 
 127.214667 35.791000 226.792300 
 127.214778 35.791000 227.509292 
 127.214889 35.791000 228.334652 
 127.213778 35.791111 245.184064 
 127.213889 35.791111 239.768288 
 127.214000 35.791111 233.418320 
 127.214111 35.791111 229.983677 
 127.214333 35.791111 225.151110 
 127.214556 35.791111 229.823065 
 127.214667 35.791111 231.632547 
 127.214778 35.791111 229.314676 
 127.214889 35.791111 230.093411 
 127.213778 35.791222 243.691230 
 127.213889 35.791222 237.477462 
 127.214000 35.791222 234.525410 
 127.214111 35.791222 234.993991 
 127.214333 35.791222 226.707350 
 127.214556 35.791222 233.182022 
 127.214667 35.791222 234.506938 
 127.214778 35.791222 231.546935 
 127.214889 35.791222 234.321618 
 127.213889 35.791222 237.477462 
 127.214000 35.791222 234.525410 
 127.214111 35.791222 234.993991 
 127.214222 35.791222 231.464385 
 127.214444 35.791222 227.391282 
 127.214667 35.791222 234.506938 
 127.214778 35.791222 231.546935 
 127.214889 35.791222 234.321618 
 127.215000 35.791222 245.376356 
 127.213889 35.791333 235.935671 
 127.214000 35.791333 235.810326 
 127.214111 35.791333 240.759020 
 127.214222 35.791333 239.677634 
 127.214444 35.791333 230.476531 
 127.214667 35.791333 237.564844 
 127.214778 35.791333 235.939679 
 127.214889 35.791333 242.642450 
 127.215000 35.791333 255.952053 
 127.213889 35.791445 235.390770 
 127.214000 35.791445 237.985834 
 127.214111 35.791445 246.422099 
 127.214222 35.791445 248.620202 
 127.214444 35.791445 238.406680 
 127.214667 35.791445 243.368595 
 127.214778 35.791445 244.378388 
 127.214889 35.791445 253.341724 
 127.215000 35.791445 262.507830 
 127.214000 35.791445 237.985834 
 127.214111 35.791445 246.422099 
 127.214222 35.791445 248.620202 
 127.214333 35.791445 241.740500 
 127.214556 35.791445 240.830316 
 127.214778 35.791445 244.378388 
 127.214889 35.791445 253.341724 
 127.215000 35.791445 262.507830 
 127.215111 35.791445 259.656969 
 127.214000 35.791556 241.490565 
 127.214111 35.791556 250.951694 
 127.214222 35.791556 255.849076 
 127.214333 35.791556 258.474847 
 127.214556 35.791556 250.687866 
 127.214778 35.791556 254.725337 
 127.214889 35.791556 261.343955 
 127.215000 35.791556 264.407296 
 127.215111 35.791556 255.070331 
 127.214000 35.791667 245.994797 
 127.214111 35.791667 254.477412 
 127.214222 35.791667 262.330317 
 127.214333 35.791667 273.396662 
 127.214556 35.791667 261.904738 
 127.214778 35.791667 261.317177 
 127.214889 35.791667 264.975352 
 127.215000 35.791667 263.161926 
 127.215111 35.791667 249.481289 
 127.214111 35.791667 254.477412 
 127.214222 35.791667 262.330317 
 127.214333 35.791667 273.396662 
 127.214444 35.791667 272.518321 
 127.214667 35.791667 260.285500 
 127.214889 35.791667 264.975352 
 127.215000 35.791667 263.161926 
 127.215111 35.791667 249.481289 
 127.215222 35.791667 239.249222 
 127.214111 35.791778 258.205440 
 127.214222 35.791778 269.526249 
 127.214333 35.791778 281.967846 
 127.214444 35.791778 281.534991 
 127.214667 35.791778 263.731547 
 127.214889 35.791778 265.746948 
 127.215000 35.791778 259.826766 
 127.215111 35.791778 244.749580 
 127.215222 35.791778 238.034973 
 127.214111 35.791889 263.788379 
 127.214222 35.791889 277.149894 
 127.214333 35.791889 286.021057 
 127.214444 35.791889 285.377612 
 127.214667 35.791889 265.673563 
 127.214889 35.791889 265.189345 
 127.215000 35.791889 255.384645 
 127.215111 35.791889 241.935275 
 127.215222 35.791889 237.921709 
 127.214222 35.791889 277.149894 
 127.214333 35.791889 286.021057 
 127.214444 35.791889 285.377612 
 127.214556 35.791889 273.280415 
 127.214778 35.791889 264.425912 
 127.215000 35.791889 255.384645 
 127.215111 35.791889 241.935275 
 127.215222 35.791889 237.921709 
 127.215333 35.791889 234.703472 
 127.214222 35.792000 283.206278 
 127.214333 35.792000 287.964972 
 127.214444 35.792000 288.116255 
 127.214556 35.792000 279.028598 
 127.214778 35.792000 265.239001 
 127.215000 35.792000 251.813381 
 127.215111 35.792000 241.755387 
 127.215222 35.792000 239.092592 
 127.215333 35.792000 234.211584 
 127.214222 35.792111 286.662064 
 127.214333 35.792111 289.299201 
 127.214444 35.792111 291.340081 
 127.214556 35.792111 286.421255 
 127.214778 35.792111 267.232158 
 127.215000 35.792111 252.176466 
 127.215111 35.792111 244.836150 
 127.215222 35.792111 241.656013 
 127.215333 35.792111 234.322033 
 127.214222 35.792222 288.330238 
 127.214333 35.792222 290.922020 
 127.214444 35.792222 294.951764 
 127.214556 35.792222 293.187089 
 127.214778 35.792222 270.960225 
 127.215000 35.792222 256.463192 
 127.215111 35.792222 249.809077 
 127.215222 35.792222 244.780963 
 127.215333 35.792222 235.125139 
 127.214333 35.792222 290.922020 
 127.214444 35.792222 294.951764 
 127.214556 35.792222 293.187089 
 127.214667 35.792222 281.951303 
 127.214889 35.792222 267.431515 
 127.215111 35.792222 249.809077 
 127.215222 35.792222 244.780963 
 127.215333 35.792222 235.125139 
 127.215444 35.792222 234.146616 
 127.214333 35.792333 293.245741 
 127.214444 35.792333 297.957083 
 127.214556 35.792333 297.372269 
 127.214667 35.792333 288.554612 
 127.214889 35.792333 269.616397 
 127.215111 35.792333 253.587255 
 127.215222 35.792333 247.527974 
 127.215333 35.792333 236.853213 
 127.215444 35.792333 237.229147 
 127.214333 35.792444 296.000303 
 127.214444 35.792444 299.805410 
 127.214556 35.792444 299.102698 
 127.214667 35.792444 291.144906 
 127.214889 35.792444 270.965768 
 127.215111 35.792444 255.725208 
 127.215222 35.792444 249.849881 
 127.215333 35.792444 240.054787 
 127.215444 35.792444 242.592252 
 127.214444 35.792444 299.805410 
 127.214556 35.792444 299.102698 
 127.214667 35.792444 291.144906 
 127.214778 35.792444 276.710433 
 127.215000 35.792444 263.333769 
 127.215222 35.792444 249.849881 
 127.215333 35.792444 240.054787 
 127.215444 35.792444 242.592252 
 127.215556 35.792444 251.048351 
 127.214444 35.792555 300.617605 
 127.214556 35.792555 298.974403 
 127.214667 35.792555 290.175834 
 127.214778 35.792555 277.552806 
 127.215000 35.792555 265.569936 
 127.215222 35.792555 251.936965 
 127.215333 35.792555 245.096838 
 127.215444 35.792555 248.966651 
 127.215556 35.792555 253.505648 
 127.214444 35.792667 300.584132 
 127.214556 35.792667 297.118311 
 127.214667 35.792667 287.986382 
 127.214778 35.792667 278.544095 
 127.215000 35.792667 267.384245 
 127.215222 35.792667 253.765007 
 127.215333 35.792667 250.654740 
 127.215444 35.792667 253.342226 
 127.215556 35.792667 253.700822 
 127.214556 35.792667 297.118311 
 127.214667 35.792667 287.986382 
 127.214778 35.792667 278.544095 
 127.214889 35.792667 272.825624 
 127.215111 35.792667 258.774781 
 127.215333 35.792667 250.654740 
 127.215444 35.792667 253.342226 
 127.215556 35.792667 253.700822 
 127.215667 35.792667 246.306111 
 127.214556 35.792778 293.859329 
 127.214667 35.792778 286.525356 
 127.214778 35.792778 279.817421 
 127.214889 35.792778 273.681729 
 127.215111 35.792778 259.763530 
 127.215333 35.792778 254.007883 
 127.215444 35.792778 254.827391 
 127.215556 35.792778 252.172380 
 127.215667 35.792778 241.687900 
 127.214556 35.792889 290.629139 
 127.214667 35.792889 286.052884 
 127.214778 35.792889 281.039865 
 127.214889 35.792889 274.363843 
 127.215111 35.792889 259.446929 
 127.215333 35.792889 254.675353 
 127.215444 35.792889 254.363397 
 127.215556 35.792889 249.043054 
 127.215667 35.792889 236.766646 
 127.214667 35.792889 286.052884 
 127.214778 35.792889 281.039865 
 127.214889 35.792889 274.363843 
 127.215000 35.792889 268.283354 
 127.215222 35.792889 254.926436 
 127.215444 35.792889 254.363397 
 127.215556 35.792889 249.043054 
 127.215667 35.792889 236.766646 
 127.215778 35.792889 228.502459 
 127.214667 35.793000 286.045719 
 127.214778 35.793000 281.866703 
 127.214889 35.793000 274.534331 
 127.215000 35.793000 267.205179 
 127.215222 35.793000 254.541523 
 127.215444 35.793000 252.387784 
 127.215556 35.793000 244.339074 
 127.215667 35.793000 232.529960 
 127.215778 35.793000 227.208584 
 127.214667 35.793111 286.078462 
 127.214778 35.793111 281.945640 
 127.214889 35.793111 273.795648 
 127.215000 35.793111 266.239237 
 127.215222 35.793111 254.165160 
 127.215444 35.793111 248.723229 
 127.215556 35.793111 238.790757 
 127.215667 35.793111 229.488260 
 127.215778 35.793111 226.167260 
 127.214778 35.793111 281.945640 
 127.214889 35.793111 273.795648 
 127.215000 35.793111 266.239237 
 127.215111 35.793111 258.254844 
 127.215333 35.793111 252.212093 
 127.215556 35.793111 238.790757 
 127.215667 35.793111 229.488260 
 127.215778 35.793111 226.167260 
 127.215889 35.793111 224.457252 
 127.214778 35.793222 280.737126 
 127.214889 35.793222 272.324826 
 127.215000 35.793222 266.240931 
 127.215111 35.793222 258.779996 
 127.215333 35.793222 249.856565 
 127.215556 35.793222 233.939209 
 127.215667 35.793222 227.467876 
 127.215778 35.793222 225.016988 
 127.215889 35.793222 222.886032 
 127.214778 35.793333 277.859006 
 127.214889 35.793333 271.090171 
 127.215000 35.793333 266.948074 
 127.215111 35.793333 259.740359 
 127.215333 35.793333 246.697929 
 127.215556 35.793333 231.025719 
 127.215667 35.793333 225.987921 
 127.215778 35.793333 223.478328 
 127.215889 35.793333 220.968992 
 127.214778 35.793444 274.377421 
 127.214889 35.793444 270.538955 
 127.215000 35.793444 267.754927 
 127.215111 35.793444 260.628654 
 127.215333 35.793444 243.071638 
 127.215556 35.793444 230.024788 
 127.215667 35.793444 224.601471 
 127.215778 35.793444 221.515170 
 127.215889 35.793444 219.235025 
 127.214889 35.793444 270.538955 
 127.215000 35.793444 267.754927 
 127.215111 35.793444 260.628654 
 127.215222 35.793444 251.201466 
 127.215444 35.793444 236.602298 
 127.215667 35.793444 224.601471 
 127.215778 35.793444 221.515170 
 127.215889 35.793444 219.235025 
 127.216000 35.793444 219.393086 
 127.214889 35.793555 270.395740 
 127.215000 35.793555 268.293639 
 127.215111 35.793555 260.801694 
 127.215222 35.793555 248.418722 
 127.215444 35.793555 235.404293 
 127.215667 35.793555 223.173263 
 127.215778 35.793555 219.521299 
 127.215889 35.793555 218.283555 
 127.216000 35.793555 220.740432 
 127.214889 35.793667 270.348232 
 127.215000 35.793667 268.323579 
 127.215111 35.793667 259.425791 
 127.215222 35.793667 244.918150 
 127.215444 35.793667 235.095315 
 127.215667 35.793667 221.973316 
 127.215778 35.793667 218.060860 
 127.215889 35.793667 218.334690 
 127.216000 35.793667 222.915126 
 127.215000 35.793667 268.323579 
 127.215111 35.793667 259.425791 
 127.215222 35.793667 244.918150 
 127.215333 35.793667 237.886411 
 127.215556 35.793667 230.790527 
 127.215778 35.793667 218.060860 
 127.215889 35.793667 218.334690 
 127.216000 35.793667 222.915126 
 127.216111 35.793667 228.868438 
 127.215000 35.793778 267.431473 
 127.215111 35.793778 255.748499 
 127.215222 35.793778 241.932425 
 127.215333 35.793778 237.201984 
 127.215556 35.793778 231.804251 
 127.215778 35.793778 217.463779 
 127.215889 35.793778 219.260441 
 127.216000 35.793778 225.344994 
 127.216111 35.793778 230.894032 
 127.215000 35.793889 264.763484 
 127.215111 35.793889 250.300149 
 127.215222 35.793889 240.347539 
 127.215333 35.793889 237.505447 
 127.215556 35.793889 233.773416 
 127.215778 35.793889 217.877273 
 127.215889 35.793889 220.817213 
 127.216000 35.793889 227.595289 
 127.216111 35.793889 232.436559 
 127.215111 35.793889 250.300149 
 127.215222 35.793889 240.347539 
 127.215333 35.793889 237.505447 
 127.215444 35.793889 236.317455 
 127.215667 35.793889 222.843855 
 127.215889 35.793889 220.817213 
 127.216000 35.793889 227.595289 
 127.216111 35.793889 232.436559 
 127.216222 35.793889 235.689466 
 127.215111 35.794000 245.371976 
 127.215222 35.794000 239.967734 
 127.215333 35.794000 238.419659 
 127.215444 35.794000 238.118807 
 127.215667 35.794000 227.684658 
 127.215889 35.794000 222.846463 
 127.216000 35.794000 229.511443 
 127.216111 35.794000 233.710664 
 127.216222 35.794000 236.860961 
 127.215111 35.794111 242.547357 
 127.215222 35.794111 240.190242 
 127.215333 35.794111 239.692037 
 127.215444 35.794111 241.240467 
 127.215667 35.794111 238.686834 
 127.215889 35.794111 225.460059 
 127.216000 35.794111 231.176975 
 127.216111 35.794111 234.910619 
 127.216222 35.794111 237.855958 
 127.215222 35.794111 240.190242 
 127.215333 35.794111 239.692037 
 127.215444 35.794111 241.240467 
 127.215556 35.794111 245.959383 
 127.215778 35.794111 224.863556 
 127.216000 35.794111 231.176975 
 127.216111 35.794111 234.910619 
 127.216222 35.794111 237.855958 
 127.216333 35.794111 239.249736 
 127.215222 35.794222 240.623438 
 127.215333 35.794222 241.291011 
 127.215444 35.794222 246.111933 
 127.215556 35.794222 256.520736 
 127.215778 35.794222 235.644813 
 127.216000 35.794222 232.929780 
 127.216111 35.794222 236.164902 
 127.216222 35.794222 238.577515 
 127.216333 35.794222 239.178473 
 127.215222 35.794333 241.163541 
 127.215333 35.794333 243.420540 
 127.215444 35.794333 252.583395 
 127.215556 35.794333 265.547056 
 127.215778 35.794333 251.015978 
 127.216000 35.794333 235.470126 
 127.216111 35.794333 237.503458 
 127.216222 35.794333 238.944413 
 127.216333 35.794333 238.720137 
 127.215222 35.794444 241.902564 
 127.215333 35.794444 246.485915 
 127.215444 35.794444 259.613524 
 127.215556 35.794444 270.925170 
 127.215778 35.794444 262.816278 
 127.216000 35.794444 239.992036 
 127.216111 35.794444 238.944428 
 127.216222 35.794444 238.892458 
 127.216333 35.794444 237.750739 
 127.215333 35.794444 246.485915 
 127.215444 35.794444 259.613524 
 127.215556 35.794444 270.925170 
 127.215667 35.794444 271.748584 
 127.215889 35.794444 247.574428 
 127.216111 35.794444 238.944428 
 127.216222 35.794444 238.892458 
 127.216333 35.794444 237.750739 
 127.216444 35.794444 235.379964 
 127.215333 35.794555 250.846926 
 127.215444 35.794555 265.730787 
 127.215556 35.794555 273.500102 
 127.215667 35.794555 273.404008 
 127.215889 35.794555 256.677109 
 127.216111 35.794555 240.612092 
 127.216222 35.794555 238.342224 
 127.216333 35.794555 236.233865 
 127.216444 35.794555 233.897556 
 127.215333 35.794667 256.446628 
 127.215444 35.794667 270.125973 
 127.215556 35.794667 274.555267 
 127.215667 35.794667 273.357447 
 127.215889 35.794667 260.230564 
 127.216111 35.794667 242.763094 
 127.216222 35.794667 237.290631 
 127.216333 35.794667 234.457506 
 127.216444 35.794667 233.039149 
 127.215444 35.794667 270.125973 
 127.215556 35.794667 274.555267 
 127.215667 35.794667 273.357447 
 127.215778 35.794667 267.592407 
 127.216000 35.794667 253.178603 
 127.216222 35.794667 237.290631 
 127.216333 35.794667 234.457506 
 127.216444 35.794667 233.039149 
 127.216556 35.794667 237.369734 
 127.215444 35.794778 272.821933 
 127.215556 35.794778 274.809463 
 127.215667 35.794778 272.497579 
 127.215778 35.794778 266.298775 
 127.216000 35.794778 256.646209 
 127.216222 35.794778 236.064966 
 127.216333 35.794778 233.006205 
 127.216444 35.794778 233.080808 
 127.216556 35.794778 240.965162 
 127.215444 35.794889 274.257518 
 127.215556 35.794889 274.563095 
 127.215667 35.794889 271.104328 
 127.215778 35.794889 264.635371 
 127.216000 35.794889 258.086151 
 127.216222 35.794889 235.310695 
 127.216333 35.794889 232.294619 
 127.216444 35.794889 234.084610 
 127.216556 35.794889 245.205520 
 127.215556 35.794889 274.563095 
 127.215667 35.794889 271.104328 
 127.215778 35.794889 264.635371 
 127.215889 35.794889 260.400039 
 127.216111 35.794889 248.180159 
 127.216333 35.794889 232.294619 
 127.216444 35.794889 234.084610 
 127.216556 35.794889 245.205520 
 127.216667 35.794889 257.466374 
 127.215556 35.795000 273.891608 
 127.215667 35.795000 269.287390 
 127.215778 35.795000 263.078536 
 127.215889 35.795000 260.096791 
 127.216111 35.795000 250.891951 
 127.216333 35.795000 232.514908 
 127.216444 35.795000 236.214762 
 127.216556 35.795000 249.476142 
 127.216667 35.795000 259.535696 
 127.215556 35.795111 272.768364 
 127.215667 35.795111 267.208375 
 127.215778 35.795111 261.860029 
 127.215889 35.795111 260.077414 
 127.216111 35.795111 253.985901 
 127.216333 35.795111 234.220113 
 127.216444 35.795111 239.974749 
 127.216556 35.795111 253.436633 
 127.216667 35.795111 261.313581 
 127.215667 35.795111 267.208375 
 127.215778 35.795111 261.860029 
 127.215889 35.795111 260.077414 
 127.216000 35.795111 259.739116 
 127.216222 35.795111 237.440634 
 127.216444 35.795111 239.974749 
 127.216556 35.795111 253.436633 
 127.216667 35.795111 261.313581 
 127.216778 35.795111 266.087743 
 127.215667 35.795222 265.115428 
 127.215778 35.795222 261.107208 
 127.215889 35.795222 260.550882 
 127.216000 35.795222 261.234395 
 127.216222 35.795222 242.058932 
 127.216444 35.795222 246.155641 
 127.216556 35.795222 257.227590 
 127.216667 35.795222 263.476859 
 127.216778 35.795222 270.359006 
 127.215667 35.795333 263.317546 
 127.215778 35.795333 260.940101 
 127.215889 35.795333 261.729634 
 127.216000 35.795333 263.460538 
 127.216222 35.795333 250.363605 
 127.216444 35.795333 254.436090 
 127.216556 35.795333 261.240829 
 127.216667 35.795333 266.958571 
 127.216778 35.795333 277.559811 
 127.215778 35.795333 260.940101 
 127.215889 35.795333 261.729634 
 127.216000 35.795333 263.460538 
 127.216111 35.795333 262.496221 
 127.216333 35.795333 247.971687 
 127.216556 35.795333 261.240829 
 127.216667 35.795333 266.958571 
 127.216778 35.795333 277.559811 
 127.216889 35.795333 295.537962 
 127.215778 35.795444 261.481706 
 127.215889 35.795444 263.617826 
 127.216000 35.795444 265.949200 
 127.216111 35.795444 266.419582 
 127.216333 35.795444 258.448869 
 127.216556 35.795444 265.649922 
 127.216667 35.795444 272.848617 
 127.216778 35.795444 287.438776 
 127.216889 35.795444 302.285426 
 127.215778 35.795556 262.754765 
 127.215889 35.795556 265.780333 
 127.216000 35.795556 268.034571 
 127.216111 35.795556 269.229039 
 127.216333 35.795556 265.743482 
 127.216556 35.795556 269.915137 
 127.216667 35.795556 281.157238 
 127.216778 35.795556 297.050344 
 127.216889 35.795556 306.201167 
 127.215778 35.795667 264.508128 
 127.215889 35.795667 267.646636 
 127.216000 35.795667 269.536633 
 127.216111 35.795667 271.498744 
 127.216333 35.795667 270.131031 
 127.216556 35.795667 273.470344 
 127.216667 35.795667 289.625695 
 127.216778 35.795667 303.455340 
 127.216889 35.795667 308.084609 
 127.215889 35.795667 267.646636 
 127.216000 35.795667 269.536633 
 127.216111 35.795667 271.498744 
 127.216222 35.795667 273.360451 
 127.216444 35.795667 269.422318 
 127.216667 35.795667 289.625695 
 127.216778 35.795667 303.455340 
 127.216889 35.795667 308.084609 
 127.217000 35.795667 309.670614 
 127.215889 35.795778 268.996395 
 127.216000 35.795778 270.741083 
 127.216111 35.795778 274.115689 
 127.216222 35.795778 278.459681 
 127.216444 35.795778 271.681766 
 127.216667 35.795778 295.989802 
 127.216778 35.795778 306.664887 
 127.216889 35.795778 308.978985 
 127.217000 35.795778 310.463580 
 127.215889 35.795889 269.943002 
 127.216000 35.795889 272.087697 
 127.216111 35.795889 277.574757 
 127.216222 35.795889 283.253297 
 127.216444 35.795889 275.613082 
 127.216667 35.795889 300.211145 
 127.216778 35.795889 308.097059 
 127.216889 35.795889 309.580317 
 127.217000 35.795889 311.523883 
 127.216000 35.795889 272.087697 
 127.216111 35.795889 277.574757 
 127.216222 35.795889 283.253297 
 127.216333 35.795889 279.507240 
 127.216556 35.795889 280.999729 
 127.216778 35.795889 308.097059 
 127.216889 35.795889 309.580317 
 127.217000 35.795889 311.523883 
 127.217111 35.795889 314.192010 
 127.216000 35.796000 274.035268 
 127.216111 35.796000 281.550925 
 127.216222 35.796000 287.051927 
 127.216333 35.796000 286.003524 
 127.216556 35.796000 288.085080 
 127.216778 35.796000 308.928442 
 127.216889 35.796000 310.346150 
 127.217000 35.796000 312.818641 
 127.217111 35.796000 315.083712 
 127.216000 35.796111 276.846610 
 127.216111 35.796111 285.117094 
 127.216222 35.796111 289.712917 
 127.216333 35.796111 292.245846 
 127.216556 35.796111 297.990249 
 127.216778 35.796111 310.056406 
 127.216889 35.796111 311.745677 
 127.217000 35.796111 314.218004 
 127.217111 35.796111 315.673852 
 127.216111 35.796111 285.117094 
 127.216222 35.796111 289.712917 
 127.216333 35.796111 292.245846 
 127.216444 35.796111 294.366546 
 127.216667 35.796111 306.485903 
 127.216889 35.796111 311.745677 
 127.217000 35.796111 314.218004 
 127.217111 35.796111 315.673852 
 127.217222 35.796111 315.871029 
 127.216111 35.796222 287.745657 
 127.216222 35.796222 291.752028 
 127.216333 35.796222 297.486871 
 127.216444 35.796222 303.758222 
 127.216667 35.796222 310.397188 
 127.216889 35.796222 314.546989 
 127.217000 35.796222 315.748425 
 127.217111 35.796222 316.088117 
 127.217222 35.796222 315.554268 
 127.216111 35.796333 289.578427 
 127.216222 35.796333 293.784267 
 127.216333 35.796333 301.880191 
 127.216444 35.796333 309.187496 
 127.216667 35.796333 316.063711 
 127.216889 35.796333 319.687113 
 127.217000 35.796333 317.740152 
 127.217111 35.796333 316.467520 
 127.217222 35.796333 314.775561 
 127.216222 35.796333 293.784267 
 127.216333 35.796333 301.880191 
 127.216444 35.796333 309.187496 
 127.216556 35.796333 312.344149 
 127.216778 35.796333 319.491143 
 127.217000 35.796333 317.740152 
 127.217111 35.796333 316.467520 
 127.217222 35.796333 314.775561 
 127.217333 35.796333 310.989046 
 127.216222 35.796444 296.302997 
 127.216333 35.796444 305.691594 
 127.216444 35.796444 312.369148 
 127.216556 35.796444 316.684180 
 127.216778 35.796444 329.241145 
 127.217000 35.796444 320.759370 
 127.217111 35.796444 316.956567 
 127.217222 35.796444 313.492616 
 127.217333 35.796444 309.594835 
 127.216222 35.796556 299.586232 
 127.216333 35.796556 309.097580 
 127.216444 35.796556 315.541351 
 127.216556 35.796556 322.886984 
 127.216778 35.796556 337.161920 
 127.217000 35.796556 325.123067 
 127.217111 35.796556 317.664668 
 127.217222 35.796556 311.971113 
 127.217333 35.796556 308.758928 
 127.216222 35.796667 303.524587 
 127.216333 35.796667 312.484263 
 127.216444 35.796667 320.616003 
 127.216556 35.796667 332.348713 
 127.216778 35.796667 341.529617 
 127.217000 35.796667 329.969286 
 127.217111 35.796667 318.428965 
 127.217222 35.796667 310.646104 
 127.217333 35.796667 308.255164 
 127.216333 35.796667 312.484263 
 127.216444 35.796667 320.616003 
 127.216556 35.796667 332.348713 
 127.216667 35.796667 342.620466 
 127.216889 35.796667 337.901910 
 127.217111 35.796667 318.428965 
 127.217222 35.796667 310.646104 
 127.217333 35.796667 308.255164 
 127.217444 35.796667 306.854261 
 127.216333 35.796778 316.789025 
 127.216444 35.796778 328.901353 
 127.216556 35.796778 343.304614 
 127.216667 35.796778 349.557102 
 127.216889 35.796778 339.900993 
 127.217111 35.796778 318.529261 
 127.217222 35.796778 309.717748 
 127.217333 35.796778 307.828218 
 127.217444 35.796778 305.389515 
 127.216333 35.796889 323.218620 
 127.216444 35.796889 339.469905 
 127.216556 35.796889 352.234774 
 127.216667 35.796889 353.958316 
 127.216889 35.796889 340.140127 
 127.217111 35.796889 317.324654 
 127.217222 35.796889 309.123055 
 127.217333 35.796889 307.256546 
 127.217444 35.796889 302.670392 
 127.216444 35.796889 339.469905 
 127.216556 35.796889 352.234774 
 127.216667 35.796889 353.958316 
 127.216778 35.796889 344.696268 
 127.217000 35.796889 334.448526 
 127.217222 35.796889 309.123055 
 127.217333 35.796889 307.256546 
 127.217444 35.796889 302.670392 
 127.217556 35.796889 291.361411 
 127.216444 35.797000 349.235922 
 127.216556 35.797000 357.775788 
 127.216667 35.797000 356.179731 
 127.216778 35.797000 344.009119 
 127.217000 35.797000 332.947862 
 127.217222 35.797000 308.720730 
 127.217333 35.797000 306.401713 
 127.217444 35.797000 298.859147 
 127.217556 35.797000 288.468804 
 127.216444 35.797111 355.992604 
 127.216556 35.797111 360.653894 
 127.216667 35.797111 356.423413 
 127.216778 35.797111 341.051947 
 127.217000 35.797111 329.849548 
 127.217222 35.797111 308.435318 
 127.217333 35.797111 305.357325 
 127.217444 35.797111 295.307369 
 127.217556 35.797111 287.114255 
 127.216556 35.797111 360.653894 
 127.216667 35.797111 356.423413 
 127.216778 35.797111 341.051947 
 127.216889 35.797111 335.114272 
 127.217111 35.797111 313.447536 
 127.217333 35.797111 305.357325 
 127.217444 35.797111 295.307369 
 127.217556 35.797111 287.114255 
 127.217667 35.797111 285.841751 
 127.216556 35.797222 361.919627 
 127.216667 35.797222 354.522174 
 127.216778 35.797222 336.518850 
 127.216889 35.797222 331.222293 
 127.217111 35.797222 312.354225 
 127.217333 35.797222 304.343354 
 127.217444 35.797222 292.936612 
 127.217556 35.797222 286.643994 
 127.217667 35.797222 286.164437 
 127.216556 35.797333 362.133904 
 127.216667 35.797333 350.400609 
 127.216778 35.797333 333.044201 
 127.216889 35.797333 329.114114 
 127.217111 35.797333 312.622147 
 127.217333 35.797333 303.514949 
 127.217444 35.797333 291.599315 
 127.217556 35.797333 286.677359 
 127.217667 35.797333 286.846917 
 127.216667 35.797333 350.400609 
 127.216778 35.797333 333.044201 
 127.216889 35.797333 329.114114 
 127.217000 35.797333 325.285115 
 127.217222 35.797333 308.445734 
 127.217444 35.797333 291.599315 
 127.217556 35.797333 286.677359 
 127.217667 35.797333 286.846917 
 127.217778 35.797333 288.793034 
 127.216667 35.797444 345.425207 
 127.216778 35.797444 332.867621 
 127.216889 35.797444 329.832308 
 127.217000 35.797444 326.421773 
 127.217222 35.797444 309.600544 
 127.217444 35.797444 291.067829 
 127.217556 35.797444 287.183460 
 127.217667 35.797444 288.057596 
 127.217778 35.797444 290.633740 
 127.216667 35.797556 342.825215 
 127.216778 35.797556 336.065894 
 127.216889 35.797556 333.230738 
 127.217000 35.797556 329.862840 
 127.217222 35.797556 313.245762 
 127.217444 35.797556 291.682822 
 127.217556 35.797556 288.377197 
 127.217667 35.797556 289.870082 
 127.217778 35.797556 292.501437 
 127.216667 35.797667 343.624771 
 127.216778 35.797667 340.474184 
 127.216889 35.797667 337.709836 
 127.217000 35.797667 333.396574 
 127.217222 35.797667 319.538538 
 127.217444 35.797667 294.468974 
 127.217556 35.797667 290.484120 
 127.217667 35.797667 291.969145 
 127.217778 35.797667 293.890288 
 127.216778 35.797667 340.474184 
 127.216889 35.797667 337.709836 
 127.217000 35.797667 333.396574 
 127.217111 35.797667 327.913557 
 127.217333 35.797667 308.458178 
 127.217556 35.797667 290.484120 
 127.217667 35.797667 291.969145 
 127.217778 35.797667 293.890288 
 127.217889 35.797667 294.149767 
 127.216778 35.797778 343.813169 
 127.216889 35.797778 341.009980 
 127.217000 35.797778 335.089122 
 127.217111 35.797778 330.766128 
 127.217333 35.797778 314.647788 
 127.217556 35.797778 293.307232 
 127.217667 35.797778 293.764519 
 127.217778 35.797778 294.608337 
 127.217889 35.797778 293.397645 
 127.216778 35.797889 345.562961 
 127.216889 35.797889 342.298598 
 127.217000 35.797889 335.186969 
 127.217111 35.797889 331.289530 
 127.217333 35.797889 318.736393 
 127.217556 35.797889 296.126232 
 127.217667 35.797889 294.923924 
 127.217778 35.797889 294.752796 
 127.217889 35.797889 292.123730 
 127.216889 35.797889 342.298598 
 127.217000 35.797889 335.186969 
 127.217111 35.797889 331.289530 
 127.217222 35.797889 325.872678 
 127.217444 35.797889 306.407120 
 127.217667 35.797889 294.923924 
 127.217778 35.797889 294.752796 
 127.217889 35.797889 292.123730 
 127.218000 35.797889 288.166476 
 127.216889 35.798000 342.035681 
 127.217000 35.798000 334.504446 
 127.217111 35.798000 330.703169 
 127.217222 35.798000 325.428210 
 127.217444 35.798000 311.225291 
 127.217667 35.798000 295.561560 
 127.217778 35.798000 294.508067 
 127.217889 35.798000 290.693703 
 127.218000 35.798000 287.045403 
 127.216889 35.798111 340.752950 
 127.217000 35.798111 333.419514 
 127.217111 35.798111 329.452140 
 127.217222 35.798111 324.351951 
 127.217444 35.798111 314.411847 
 127.217667 35.798111 295.940978 
 127.217778 35.798111 294.059136 
 127.217889 35.798111 289.475467 
 127.218000 35.798111 286.504440 
 127.217000 35.798111 333.419514 
 127.217111 35.798111 329.452140 
 127.217222 35.798111 324.351951 
 127.217333 35.798111 320.824771 
 127.217556 35.798111 300.664754 
 127.217778 35.798111 294.059136 
 127.217889 35.798111 289.475467 
 127.218000 35.798111 286.504440 
 127.218111 35.798111 286.925122 
 127.217000 35.798222 331.949032 
 127.217111 35.798222 327.698947 
 127.217222 35.798222 323.280946 
 127.217333 35.798222 321.188826 
 127.217556 35.798222 303.255463 
 127.217778 35.798222 293.646093 
 127.217889 35.798222 288.755456 
 127.218000 35.798222 286.560904 
 127.218111 35.798222 288.500100 
 127.217000 35.798333 329.958637 
 127.217111 35.798333 325.703192 
 127.217222 35.798333 322.589080 
 127.217333 35.798333 321.940881 
 127.217556 35.798333 307.448341 
 127.217778 35.798333 293.765431 
 127.217889 35.798333 288.994255 
 127.218000 35.798333 287.491001 
 127.218111 35.798333 290.990950 
 127.217111 35.798333 325.703192 
 127.217222 35.798333 322.589080 
 127.217333 35.798333 321.940881 
 127.217444 35.798333 319.929825 
 127.217667 35.798333 297.282190 
 127.217889 35.798333 288.994255 
 127.218000 35.798333 287.491001 
 127.218111 35.798333 290.990950 
 127.218222 35.798333 295.777446 
 127.217111 35.798444 323.960527 
 127.217222 35.798444 322.583557 
 127.217333 35.798444 323.597610 
 127.217444 35.798444 323.978895 
 127.217667 35.798444 299.960316 
 127.217889 35.798444 291.425512 
 127.218000 35.798444 289.933163 
 127.218111 35.798444 293.762546 
 127.218222 35.798444 296.848390 
 127.217111 35.798556 322.970431 
 127.217222 35.798556 323.587363 
 127.217333 35.798556 326.452636 
 127.217444 35.798556 328.615480 
 127.217667 35.798556 306.447535 
 127.217889 35.798556 297.629462 
 127.218000 35.798556 294.444642 
 127.218111 35.798556 296.019216 
 127.218222 35.798556 297.106969 
 127.217222 35.798667 325.793143 
 127.217333 35.798667 329.887592 
 127.217444 35.798667 332.324305 
 127.217556 35.798667 330.414951 
 127.217778 35.798667 307.768880 
 127.218000 35.798667 300.113599 
 127.218111 35.798667 297.453581 
 127.218222 35.798667 296.576547 
 127.218333 35.798667 295.237263 
 127.217222 35.798778 328.812467 
 127.217333 35.798778 332.746898 
 127.217444 35.798778 334.516841 
 127.217556 35.798778 333.994788 
 127.217778 35.798778 312.124726 
 127.218000 35.798778 304.929127 
 127.218111 35.798778 298.199279 
 127.218222 35.798778 295.368526 
 127.218333 35.798778 293.488063 
 127.217222 35.798889 331.674474 
 127.217333 35.798889 334.541335 
 127.217444 35.798889 335.629884 
 127.217556 35.798889 335.591487 
 127.217778 35.798889 314.993013 
 127.218000 35.798889 308.163229 
 127.218111 35.798889 298.630758 
 127.218222 35.798889 294.273332 
 127.218333 35.798889 292.494343 
 127.217333 35.798889 334.541335 
 127.217444 35.798889 335.629884 
 127.217556 35.798889 335.591487 
 127.217667 35.798889 328.218029 
 127.217889 35.798889 311.913541 
 127.218111 35.798889 298.630758 
 127.218222 35.798889 294.273332 
 127.218333 35.798889 292.494343 
 127.218444 35.798889 289.595638 
 127.217333 35.799000 335.514261 
 127.217444 35.799000 336.206814 
 127.217556 35.799000 336.391224 
 127.217667 35.799000 331.514941 
 127.217889 35.799000 313.829353 
 127.218111 35.799000 299.762008 
 127.218222 35.799000 294.689887 
 127.218333 35.799000 292.937410 
 127.218444 35.799000 289.388365 
 127.217333 35.799111 336.033429 
 127.217444 35.799111 336.574499 
 127.217556 35.799111 336.888505 
 127.217667 35.799111 333.921165 
 127.217889 35.799111 317.317611 
 127.218111 35.799111 303.458899 
 127.218222 35.799111 298.140870 
 127.218333 35.799111 295.539117 
 127.218444 35.799111 290.129195 
 127.217444 35.799111 336.574499 
 127.217556 35.799111 336.888505 
 127.217667 35.799111 333.921165 
 127.217778 35.799111 323.007753 
 127.218000 35.799111 313.866645 
 127.218222 35.799111 298.140870 
 127.218333 35.799111 295.539117 
 127.218444 35.799111 290.129195 
 127.218556 35.799111 289.954852 
 127.217444 35.799222 336.877036 
 127.217556 35.799222 337.211441 
 127.217667 35.799222 335.457204 
 127.217778 35.799222 328.037757 
 127.218000 35.799222 319.083035 
 127.218222 35.799222 305.412567 
 127.218333 35.799222 301.455442 
 127.218444 35.799222 293.090289 
 127.218556 35.799222 294.578995 
 127.217444 35.799333 337.143930 
 127.217556 35.799333 337.406335 
 127.217667 35.799333 336.340482 
 127.217778 35.799333 331.983308 
 127.218000 35.799333 325.421931 
 127.218222 35.799333 313.860531 
 127.218333 35.799333 310.269521 
 127.218444 35.799333 300.516229 
 127.218556 35.799333 303.284626 
 127.217556 35.799333 337.406335 
 127.217667 35.799333 336.340482 
 127.217778 35.799333 331.983308 
 127.217889 35.799333 328.917910 
 127.218111 35.799333 317.370838 
 127.218333 35.799333 310.269521 
 127.218444 35.799333 300.516229 
 127.218556 35.799333 303.284626 
 127.218667 35.799333 311.473280 
 127.217556 35.799444 337.529676 
 127.217667 35.799444 336.977109 
 127.217778 35.799444 334.951834 
 127.217889 35.799444 333.767678 
 127.218111 35.799444 321.632652 
 127.218333 35.799444 318.048991 
 127.218444 35.799444 309.227593 
 127.218556 35.799444 309.547754 
 127.218667 35.799444 313.048899 
 127.217556 35.799556 337.674520 
 127.217667 35.799556 338.069546 
 127.217778 35.799556 338.728530 
 127.217889 35.799556 339.126077 
 127.218111 35.799556 324.693455 
 127.218333 35.799556 323.882201 
 127.218444 35.799556 315.496892 
 127.218556 35.799556 313.445368 
 127.218667 35.799556 315.241250 
 127.217667 35.799556 338.069546 
 127.217778 35.799556 338.728530 
 127.217889 35.799556 339.126077 
 127.218000 35.799556 337.599297 
 127.218222 35.799556 322.402991 
 127.218444 35.799556 315.496892 
 127.218556 35.799556 313.445368 
 127.218667 35.799556 315.241250 
 127.218778 35.799556 333.417691 
 127.217667 35.799667 341.032172 
 127.217778 35.799667 345.544738 
 127.217889 35.799667 347.269150 
 127.218000 35.799667 347.194981 
 127.218222 35.799667 325.816967 
 127.218444 35.799667 324.748496 
 127.218556 35.799667 322.848084 
 127.218667 35.799667 328.212401 
 127.218778 35.799667 336.472798 
 127.217667 35.799778 347.866113 
 127.217778 35.799778 355.257547 
 127.217889 35.799778 357.278141 
 127.218000 35.799778 358.544053 
 127.218222 35.799778 333.233061 
 127.218444 35.799778 338.553304 
 127.218556 35.799778 340.226820 
 127.218667 35.799778 346.442695 
 127.218778 35.799778 338.819355 
 127.217667 35.799889 357.566498 
 127.217778 35.799889 363.486221 
 127.217889 35.799889 364.810166 
 127.218000 35.799889 366.490445 
 127.218222 35.799889 345.137780 
 127.218444 35.799889 346.841175 
 127.218556 35.799889 349.901009 
 127.218667 35.799889 351.466075 
 127.218778 35.799889 346.093423 
 127.217778 35.799889 363.486221 
 127.217889 35.799889 364.810166 
 127.218000 35.799889 366.490445 
 127.218111 35.799889 359.960545 
 127.218333 35.799889 345.851797 
 127.218556 35.799889 349.901009 
 127.218667 35.799889 351.466075 
 127.218778 35.799889 346.093423 
 127.218889 35.799889 351.923756 
 127.217778 35.800000 367.751986 
 127.217889 35.800000 368.480593 
 127.218000 35.800000 370.099940 
 127.218111 35.800000 368.857048 
 127.218333 35.800000 349.086181 
 127.218556 35.800000 353.273641 
 127.218667 35.800000 355.280743 
 127.218778 35.800000 361.881952 
 127.218889 35.800000 368.820990 
 127.217778 35.800111 369.400703 
 127.217889 35.800111 369.937865 
 127.218000 35.800111 371.551279 
 127.218111 35.800111 371.987944 
 127.218333 35.800111 352.559725 
 127.218556 35.800111 359.154897 
 127.218667 35.800111 362.914450 
 127.218778 35.800111 373.277003 
 127.218889 35.800111 375.221603 
 127.217889 35.800111 369.937865 
 127.218000 35.800111 371.551279 
 127.218111 35.800111 371.987944 
 127.218222 35.800111 363.814978 
 127.218444 35.800111 352.605971 
 127.218667 35.800111 362.914450 
 127.218778 35.800111 373.277003 
 127.218889 35.800111 375.221603 
 127.219000 35.800111 371.158187 
 127.217889 35.800222 370.580285 
 127.218000 35.800222 372.380749 
 127.218111 35.800222 373.919863 
 127.218222 35.800222 371.170434 
 127.218444 35.800222 362.494857 
 127.218667 35.800222 375.487265 
 127.218778 35.800222 376.541373 
 127.218889 35.800222 375.202727 
 127.219000 35.800222 370.451227 
 127.217889 35.800333 371.050490 
 127.218000 35.800333 373.583213 
 127.218111 35.800333 377.973000 
 127.218222 35.800333 381.915107 
 127.218444 35.800333 379.500892 
 127.218667 35.800333 383.656169 
 127.218778 35.800333 376.898066 
 127.218889 35.800333 373.373595 
 127.219000 35.800333 370.053611 
 127.218000 35.800333 373.583213 
 127.218111 35.800333 377.973000 
 127.218222 35.800333 381.915107 
 127.218333 35.800333 379.431472 
 127.218556 35.800333 383.382176 
 127.218778 35.800333 376.898066 
 127.218889 35.800333 373.373595 
 127.219000 35.800333 370.053611 
 127.219111 35.800333 369.328428 
 127.218000 35.800444 376.654337 
 127.218111 35.800444 387.058259 
 127.218222 35.800444 395.045133 
 127.218333 35.800444 391.583920 
 127.218556 35.800444 386.805488 
 127.218778 35.800444 375.692918 
 127.218889 35.800444 371.862435 
 127.219000 35.800444 369.662679 
 127.219111 35.800444 368.238935 
 127.218000 35.800556 383.700446 
 127.218111 35.800556 399.182099 
 127.218222 35.800556 404.730048 
 127.218333 35.800556 396.054932 
 127.218556 35.800556 387.202768 
 127.218778 35.800556 373.198150 
 127.218889 35.800556 371.011859 
 127.219000 35.800556 368.148286 
 127.219111 35.800556 363.780755 
 127.218111 35.800556 399.182099 
 127.218222 35.800556 404.730048 
 127.218333 35.800556 396.054932 
 127.218444 35.800556 392.716217 
 127.218667 35.800556 383.711335 
 127.218889 35.800556 371.011859 
 127.219000 35.800556 368.148286 
 127.219111 35.800556 363.780755 
 127.219222 35.800556 341.828584 
 127.218111 35.800667 408.047111 
 127.218222 35.800667 409.484923 
 127.218333 35.800667 397.369043 
 127.218444 35.800667 391.976018 
 127.218667 35.800667 374.972615 
 127.218889 35.800667 369.324033 
 127.219000 35.800667 362.014337 
 127.219111 35.800667 351.306006 
 127.219222 35.800667 330.024405 
 127.218111 35.800778 412.309965 
 127.218222 35.800778 409.771517 
 127.218333 35.800778 394.818772 
 127.218444 35.800778 385.591636 
 127.218667 35.800778 358.752970 
 127.218889 35.800778 363.483001 
 127.219000 35.800778 348.129938 
 127.219111 35.800778 336.985370 
 127.219222 35.800778 325.832749 
 127.218111 35.800889 413.504009 
 127.218222 35.800889 403.429893 
 127.218333 35.800889 387.042965 
 127.218444 35.800889 375.850435 
 127.218667 35.800889 350.276038 
 127.218889 35.800889 351.190609 
 127.219000 35.800889 336.814484 
 127.219111 35.800889 331.163145 
 127.219222 35.800889 325.072853 
 127.218222 35.800889 403.429893 
 127.218333 35.800889 387.042965 
 127.218444 35.800889 375.850435 
 127.218556 35.800889 365.388803 
 127.218778 35.800889 349.270307 
 127.219000 35.800889 336.814484 
 127.219111 35.800889 331.163145 
 127.219222 35.800889 325.072853 
 127.219333 35.800889 324.278185 
 127.218222 35.801000 392.636587 
 127.218333 35.801000 381.899634 
 127.218444 35.801000 371.647229 
 127.218556 35.801000 364.372819 
 127.218778 35.801000 346.245099 
 127.219000 35.801000 333.634772 
 127.219111 35.801000 330.187546 
 127.219222 35.801000 325.437539 
 127.219333 35.801000 325.448930 
 127.218222 35.801111 385.743404 
 127.218333 35.801111 380.223783 
 127.218444 35.801111 370.651223 
 127.218556 35.801111 365.415083 
 127.218778 35.801111 345.264440 
 127.219000 35.801111 334.174224 
 127.219111 35.801111 330.743086 
 127.219222 35.801111 326.564829 
 127.219333 35.801111 327.588080 
 127.218333 35.801111 380.223783 
 127.218444 35.801111 370.651223 
 127.218556 35.801111 365.415083 
 127.218667 35.801111 350.629761 
 127.218889 35.801111 340.009530 
 127.219111 35.801111 330.743086 
 127.219222 35.801111 326.564829 
 127.219333 35.801111 327.588080 
 127.219444 35.801111 331.458305 
 127.218333 35.801222 379.403300 
 127.218444 35.801222 370.301608 
 127.218556 35.801222 367.025323 
 127.218667 35.801222 354.679835 
 127.218889 35.801222 340.132533 
 127.219111 35.801222 332.520924 
 127.219222 35.801222 328.847834 
 127.219333 35.801222 330.353288 
 127.219444 35.801222 333.177637 
 127.218333 35.801333 378.277585 
 127.218444 35.801333 370.221927 
 127.218556 35.801333 368.825204 
 127.218667 35.801333 360.409007 
 127.218889 35.801333 340.955152 
 127.219111 35.801333 336.434773 
 127.219222 35.801333 332.399256 
 127.219333 35.801333 332.667448 
 127.219444 35.801333 334.619139 
 127.218444 35.801333 370.221927 
 127.218556 35.801333 368.825204 
 127.218667 35.801333 360.409007 
 127.218778 35.801333 346.030888 
 127.219000 35.801333 339.225385 
 127.219222 35.801333 332.399256 
 127.219333 35.801333 332.667448 
 127.219444 35.801333 334.619139 
 127.219556 35.801333 339.813129 
 127.218444 35.801444 370.564692 
 127.218556 35.801444 370.086656 
 127.218667 35.801444 364.557385 
 127.218778 35.801444 348.777604 
 127.219000 35.801444 342.455033 
 127.219222 35.801444 336.743082 
 127.219333 35.801444 334.385380 
 127.219444 35.801444 336.448946 
 127.219556 35.801444 343.975319 
 127.218444 35.801556 371.009681 
 127.218556 35.801556 370.775173 
 127.218667 35.801556 367.304430 
 127.218778 35.801556 354.137493 
 127.219000 35.801556 347.457280 
 127.219222 35.801556 343.193515 
 127.219333 35.801556 336.567884 
 127.219444 35.801556 339.337030 
 127.219556 35.801556 348.587510 
 127.218556 35.801556 370.775173 
 127.218667 35.801556 367.304430 
 127.218778 35.801556 354.137493 
 127.218889 35.801556 347.119585 
 127.219111 35.801556 352.923162 
 127.219333 35.801556 336.567884 
 127.219444 35.801556 339.337030 
 127.219556 35.801556 348.587510 
 127.219667 35.801556 355.723851 
 127.218556 35.801667 371.528941 
 127.218667 35.801667 371.043615 
 127.218778 35.801667 364.039887 
 127.218889 35.801667 356.199758 
 127.219111 35.801667 367.530237 
 127.219333 35.801667 340.836914 
 127.219444 35.801667 343.621749 
 127.219556 35.801667 352.592026 
 127.219667 35.801667 357.176483 
 127.218556 35.801778 373.321953 
 127.218667 35.801778 378.384113 
 127.218778 35.801778 378.597619 
 127.218889 35.801778 370.896481 
 127.219111 35.801778 384.613404 
 127.219333 35.801778 349.347346 
 127.219444 35.801778 348.983836 
 127.219556 35.801778 355.484880 
 127.219667 35.801778 358.099710 
 127.218556 35.801889 378.092405 
 127.218667 35.801889 389.868493 
 127.218778 35.801889 392.900307 
 127.218889 35.801889 387.068199 
 127.219111 35.801889 398.197339 
 127.219333 35.801889 363.462963 
 127.219444 35.801889 354.808854 
 127.219556 35.801889 357.645408 
 127.219667 35.801889 359.009771 
 127.218667 35.801889 389.868493 
 127.218778 35.801889 392.900307 
 127.218889 35.801889 387.068199 
 127.219000 35.801889 387.913019 
 127.219222 35.801889 391.595032 
 127.219444 35.801889 354.808854 
 127.219556 35.801889 357.645408 
 127.219667 35.801889 359.009771 
 127.219778 35.801889 360.331463 
 127.218667 35.802000 400.566532 
 127.218778 35.802000 402.198051 
 127.218889 35.802000 398.886004 
 127.219000 35.802000 399.865451 
 127.219222 35.802000 403.003483 
 127.219444 35.802000 361.454675 
 127.219556 35.802000 360.278209 
 127.219667 35.802000 360.556139 
 127.219778 35.802000 361.611237 
 127.218667 35.802111 406.538728 
 127.218778 35.802111 406.830649 
 127.218889 35.802111 405.326852 
 127.219000 35.802111 406.211500 
 127.219222 35.802111 407.845462 
 127.219444 35.802111 371.312867 
 127.219556 35.802111 365.881414 
 127.219667 35.802111 363.529034 
 127.219778 35.802111 362.810936 
 127.218778 35.802111 406.830649 
 127.218889 35.802111 405.326852 
 127.219000 35.802111 406.211500 
 127.219111 35.802111 408.840374 
 127.219333 35.802111 394.120530 
 127.219556 35.802111 365.881414 
 127.219667 35.802111 363.529034 
 127.219778 35.802111 362.810936 
 127.219889 35.802111 363.118455 
 127.218778 35.802222 408.871471 
 127.218889 35.802222 408.311190 
 127.219000 35.802222 408.922882 
 127.219111 35.802222 409.827341 
 127.219333 35.802222 402.404665 
 127.219556 35.802222 377.246765 
 127.219667 35.802222 368.354963 
 127.219778 35.802222 363.886619 
 127.219889 35.802222 363.579968 
 127.218778 35.802333 409.749354 
 127.218889 35.802333 409.591582 
 127.219000 35.802333 409.802260 
 127.219111 35.802333 409.662598 
 127.219333 35.802333 405.982841 
 127.219556 35.802333 391.642485 
 127.219667 35.802333 374.816491 
 127.219778 35.802333 365.106848 
 127.219889 35.802333 364.184723 
 127.218889 35.802333 409.591582 
 127.219000 35.802333 409.802260 
 127.219111 35.802333 409.662598 
 127.219222 35.802333 408.773367 
 127.219444 35.802333 399.757038 
 127.219667 35.802333 374.816491 
 127.219778 35.802333 365.106848 
 127.219889 35.802333 364.184723 
 127.220000 35.802333 365.279754 
 127.218889 35.802445 410.045242
[truncated: 1,105,727 more chars]
