# Supplementary material for: Terrain Referenced Navigation Using a Multilayer Radial Basis Function-Based Extreme Learning Machine
Source: Hindawi journal article supplement (doi:10.1155/2019/9142694), 2019-07-11
Supplement: f1 [file 9142694.f1.zip › 9142694_Supplementary information files/CompareMatchingResults_180909/DEM_CIW_ELM2_Lambda0.2_RegulationMode3.dat]

30.000000 81.344555 81.660407 1.099376 0.000009 
 60.000000 87.598040 88.150073 1.990565 0.000007 
 90.000000 90.379723 91.138899 2.854814 0.000008 
 120.000000 92.023836 93.004319 3.739899 0.000008 
 150.000000 93.214086 94.433113 4.643884 0.000008 
 180.000000 93.441682 94.782952 5.558265 0.000009 
 210.000000 94.242626 95.856512 6.525608 0.000009 
 240.000000 94.251492 95.820369 7.419996 0.000010 
 270.000000 94.468835 95.956964 8.406954 0.000011 
 300.000000 94.936720 96.579284 9.360519 0.000012 
 330.000000 94.965222 96.672222 8.370770 0.000011 
 360.000000 95.330176 96.849617 11.209880 0.000012 
 390.000000 95.598012 96.979584 12.150974 0.000012 
 420.000000 95.593573 96.889955 10.995552 0.000013 
 450.000000 95.956790 97.088319 11.250595 0.000013 
 480.000000 95.923754 97.003361 13.241594 0.000013 
 510.000000 96.085507 97.008975 14.247825 0.000014 
 540.000000 96.320007 97.145391 13.792196 0.000015 
 570.000000 96.361370 97.097446 12.051387 0.000015 
 600.000000 96.612725 97.182091 12.837082 0.000015 
 630.000000 96.763373 97.149941 16.433369 0.000015 
 660.000000 96.804016 97.247098 15.849513 0.000015 
 690.000000 96.806834 97.254807 16.785101 0.000019 
 720.000000 96.896291 97.212642 17.033207 0.000015 
 750.000000 97.148544 97.261191 18.243221 0.000017 
 780.000000 97.169676 97.232616 21.025811 0.000017 
 810.000000 97.327673 97.332687 17.748973 0.000017 
 840.000000 97.272019 97.263912 16.323959 0.000016 
 870.000000 97.351307 97.360174 27.465458 0.000021 
 900.000000 97.492508 97.435458 28.079065 0.000017 
 930.000000 97.519340 97.390052 18.610112 0.000018 
 960.000000 97.517492 97.442492 26.948137 0.000017 
 990.000000 97.567283 97.434514 26.938217 0.000018 
 1020.000000 97.645425 97.455563 27.006663 0.000016 
 1050.000000 97.659961 97.495598 18.954443 0.000018 
 1080.000000 97.636385 97.527287 23.183206 0.000019 
 1110.000000 97.751401 97.519222 21.977522 0.000020 
 1140.000000 97.765565 97.500708 20.010476 0.000020 
 1170.000000 97.829601 97.622781 21.712090 0.000020 
 1200.000000 97.834205 97.609842 29.472007 0.000021 
 1230.000000 97.857886 97.575629 21.211329 0.000021 
 1260.000000 97.855183 97.591065 28.065472 0.000020 
 1290.000000 97.921236 97.651631 22.826545 0.000022 
 1320.000000 97.917510 97.656366 21.982117 0.000022 
 1350.000000 97.972528 97.748192 19.588834 0.000021 
 1380.000000 97.935832 97.645046 22.022688 0.000020 
 1410.000000 97.973827 97.696988 18.640427 0.000025 
 1440.000000 98.031761 97.837882 25.990896 0.000022 
 1470.000000 98.038909 97.761529 23.249620 0.000025 
 1500.000000 98.049976 97.751556 24.461556 0.000022 
 1530.000000 98.085996 97.800248 26.707080 0.000023 
 1560.000000 98.106655 97.777320 18.959349 0.000022 
 1590.000000 98.105171 97.828931 23.340368 0.000022 
 1620.000000 98.095305 97.790827 30.040418 0.000023 
 1650.000000 98.142150 97.919226 22.480456 0.000024 
 1680.000000 98.119230 97.880037 29.450479 0.000026 
 1710.000000 98.164733 97.922706 23.446655 0.000024 
 1740.000000 98.199821 97.905592 23.623891 0.000023 
 1770.000000 98.197986 97.922563 27.913099 0.000023 
 1800.000000 98.183373 97.880161 25.570202 0.000024 
 1830.000000 98.229736 97.948523 24.022072 0.000026 
 1860.000000 98.244428 97.966117 28.240590 0.000025 
 1890.000000 98.257339 98.005119 29.777802 0.000025 
 1920.000000 98.295146 98.094941 28.445828 0.000025 
 1950.000000 98.328456 98.114574 24.838083 0.000024 
 1980.000000 98.321476 98.056165 28.372697 0.000025 
 2010.000000 98.320919 98.041643 32.541190 0.000026 
 2040.000000 98.352278 98.148324 30.646427 0.000027 
 2070.000000 98.345475 98.096311 27.916483 0.000027 
 2100.000000 98.361691 98.069723 31.681590 0.000029 
 2130.000000 98.375227 98.146361 30.629032 0.000029 
 2160.000000 98.371831 98.131975 30.103596 0.000028 
 2190.000000 98.405430 98.220786 34.671461 0.000031 
 2220.000000 98.411827 98.172482 33.030437 0.000029 
 2250.000000 98.437326 98.195127 34.075950 0.000029 
 2280.000000 98.430508 98.239243 29.395287 0.000030 
 2310.000000 98.488418 98.324088 38.677356 0.000031 
 2340.000000 98.479634 98.279348 34.225211 0.000031 
 2370.000000 98.486819 98.316481 36.138791 0.000030 
 2400.000000 98.477734 98.271132 32.813125 0.000030 
 
