# Supplementary material for: Terrain Referenced Navigation Using a Multilayer Radial Basis Function-Based Extreme Learning Machine
Source: Hindawi journal article supplement (doi:10.1155/2019/9142694), 2019-07-11
Supplement: f1 [file 9142694.f1.zip › 9142694_Supplementary information files/CompareMatchingResults_180909/DEM_Cov_ELM_Lambda0.2_RegulationMode3.dat]

30.000000 74.735997 75.291625 1.162710 0.000007 
 60.000000 76.206382 76.732945 1.986721 0.000008 
 90.000000 74.795923 75.147736 2.904777 0.000009 
 120.000000 74.754290 76.059313 3.859069 0.000008 
 150.000000 74.407372 74.989913 4.796785 0.000009 
 180.000000 74.849084 75.410523 5.620036 0.000009 
 210.000000 75.001374 76.431821 6.488185 0.000010 
 240.000000 75.665503 76.108939 7.531255 0.000010 
 270.000000 76.224409 76.937859 8.387330 0.000012 
 300.000000 75.691209 76.071131 9.424559 0.000012 
 330.000000 73.195654 73.895761 10.450490 0.000013 
 360.000000 75.323956 75.803835 11.619674 0.000016 
 390.000000 74.837883 75.315027 11.215375 0.000014 
 420.000000 75.623602 76.140436 13.257682 0.000014 
 450.000000 75.450401 76.321133 12.389270 0.000014 
 480.000000 76.394875 76.907376 12.718532 0.000014 
 510.000000 72.198662 72.482691 16.188932 0.000016 
 540.000000 73.439992 73.719956 11.630440 0.000016 
 570.000000 73.289704 73.667726 10.906267 0.000018 
 600.000000 74.488067 74.903299 15.056555 0.000015 
 630.000000 74.588013 74.652851 13.516291 0.000016 
 660.000000 72.969842 73.152588 15.847636 0.000017 
 690.000000 71.558613 72.002893 16.132466 0.000016 
 720.000000 73.914911 74.143788 22.186778 0.000016 
 750.000000 73.314280 73.628798 21.339315 0.000017 
 780.000000 73.138614 73.573137 16.683404 0.000017 
 810.000000 73.593553 73.990129 20.822910 0.000018 
 840.000000 73.021212 73.286646 15.821225 0.000019 
 870.000000 73.242454 73.469621 20.992047 0.000018 
 900.000000 70.974449 71.125933 27.229049 0.000018 
 930.000000 71.144554 71.328387 19.688051 0.000018 
 960.000000 70.264616 70.463088 16.530836 0.000019 
 990.000000 72.242195 72.573467 21.540787 0.000020 
 1020.000000 71.531413 71.785497 22.337841 0.000019 
 1050.000000 72.099634 72.334854 17.386283 0.000023 
 1080.000000 72.277445 72.496461 23.754467 0.000021 
 1110.000000 69.860669 70.064368 17.645558 0.000021 
 1140.000000 72.781241 72.982409 19.227633 0.000020 
 1170.000000 71.157844 71.293171 20.533692 0.000022 
 1200.000000 71.811824 72.081597 17.153489 0.000022 
 1230.000000 71.610452 71.820512 28.890902 0.000023 
 1260.000000 74.510229 74.882726 19.164465 0.000022 
 1290.000000 71.169630 71.438536 19.165781 0.000022 
 1320.000000 71.696492 71.886820 20.418299 0.000023 
 1350.000000 71.814634 72.439268 20.377837 0.000025 
 1380.000000 72.773901 73.029845 27.206269 0.000026 
 1410.000000 72.006539 72.156628 19.373126 0.000025 
 1440.000000 72.271497 72.523855 21.192196 0.000023 
 1470.000000 73.669445 73.892058 23.585051 0.000023 
 1500.000000 73.194140 73.447295 20.282795 0.000025 
 1530.000000 71.539468 71.807762 24.541595 0.000026 
 1560.000000 72.676410 73.137609 23.445569 0.000024 
 1590.000000 72.023669 72.294189 25.688720 0.000025 
 1620.000000 72.056461 72.420611 24.405566 0.000025 
 1650.000000 72.603314 72.879421 20.062008 0.000026 
 1680.000000 67.532096 67.687665 22.591952 0.000027 
 1710.000000 71.837503 72.058378 22.439991 0.000026 
 1740.000000 71.949915 72.146017 22.078008 0.000026 
 1770.000000 72.004782 72.231550 23.579758 0.000026 
 1800.000000 71.215336 71.347000 22.924576 0.000028 
 1830.000000 72.580938 72.776999 26.797317 0.000027 
 1860.000000 71.627114 71.882815 23.927758 0.000027 
 1890.000000 71.195589 71.501390 21.730545 0.000028 
 1920.000000 72.603249 72.759781 23.528809 0.000029 
 1950.000000 72.750546 72.950694 28.993435 0.000029 
 1980.000000 67.981326 68.149031 30.663566 0.000029 
 2010.000000 70.714161 70.846909 29.932106 0.000029 
 2040.000000 71.957149 72.099854 32.849270 0.000030 
 2070.000000 72.759572 73.003313 29.682766 0.000032 
 2100.000000 68.305760 68.487048 27.962877 0.000031 
 2130.000000 72.602278 72.876343 29.245795 0.000031 
 2160.000000 71.956812 72.119786 29.414311 0.000031 
 2190.000000 70.706649 70.879121 31.940114 0.000032 
 2220.000000 68.688653 68.838734 28.602341 0.000032 
 2250.000000 68.842339 69.024205 28.976206 0.000032 
 2280.000000 68.674767 68.830541 30.675838 0.000033 
 2310.000000 68.352674 68.519396 30.777299 0.000033 
 2340.000000 68.834435 68.985021 32.654755 0.000034 
 2370.000000 68.438098 68.575614 32.688782 0.000034 
 2400.000000 68.551949 68.705689 32.686056 0.000036 
 
