# Supplementary material for: Terrain Referenced Navigation Using a Multilayer Radial Basis Function-Based Extreme Learning Machine
Source: Hindawi journal article supplement (doi:10.1155/2019/9142694), 2019-07-11
Supplement: f1 [file 9142694.f1.zip › 9142694_Supplementary information files/CompareMatchingResults_180909/DEM_ML_RBF_ELM_Lambda0.2_RegulationMode3.dat]

70	87.5669324072685	88.1617776320951	4.1795478613666	1.45726196016638E-5
140	92.2762983631906	93.5608230000033	7.2645160466165	1.50523097924283E-5
210	93.8650970585613	95.6018334141217	10.6554099127122	1.62366179161927E-5
280	94.5274898070202	96.4092808855503	14.0117277050841	1.9270677830196E-5
350	94.9691507139167	96.524843490937	17.2096958021903	1.95081620922976E-5
420	95.5061158717481	96.7027714196532	20.3835766651806	1.94189692920894E-5
490	95.9919457285628	96.8082449537322	23.5576828693443	2.04379153133155E-5
560	96.2506793082428	97.0007174109224	26.8428761402787	2.39064723238534E-5
630	96.5033780022197	97.0477710729035	30.1445249376288	2.14656301438698E-5
700	96.9162853636936	97.1267867765944	33.1212233317536	2.46462173806117E-5
770	97.0189636423084	97.1821811761035	35.2919167157418	2.45673499831036E-5
840	97.2909515034283	97.3743603330559	34.5371668584962	2.36883935924544E-5
910	97.3120671050791	97.4340684962915	40.7794170510709	2.390444875247E-5
980	97.4340094354755	97.4588935480432	43.3208569607301	2.36393090147948E-5
1050	97.5113626971464	97.5505308042231	34.419834111084	2.61092076043866E-5
1120	97.561925865902	97.687913576752	40.4763934681718	2.85574695461094E-5
1190	97.7056418775928	97.8247378351942	40.7190092653035	3.06006021195802E-5
1260	97.7296946681672	97.8054013179587	34.4626673292344	2.86069173288891E-5
1330	97.8084547858516	97.9248945382163	37.2673315338401	2.95135291951119E-5
1400	97.8726926267865	97.9571624986681	42.0411651313915	3.10770753507096E-5
1470	97.919940682891	98.081613853482	44.9803723239139	2.95104678948139E-5
1540	97.9377564981107	98.0879538875375	39.7809982716179	3.35351438306752E-5
1610	98.0162394233891	98.1566269612622	40.2512692047782	3.45085335525512E-5
1680	98.075943400191	98.236529719029	54.66263922546	3.6123758608095E-5
1750	98.1220206726011	98.299476486911	50.3026914473827	3.52572030779749E-5
1820	98.133752196135	98.3067303094728	50.7254624028983	3.4764748821561E-5
1890	98.1862136162127	98.3693581621629	49.8794708314757	3.68614282070241E-5
1960	98.2599761768271	98.4828497516036	55.1277740660924	3.82429048245587E-5
2030	98.315044758653	98.536228911139	65.8162570115724	3.81039010364507E-5
2100	98.2911886789255	98.4899908219684	56.1535774188727	3.94876087711517E-5
2170	98.3710826900522	98.552177474337	56.6750774450603	4.20393322856581E-5
2240	98.3723720577134	98.6330388686395	57.4938418242926	3.99690112146253E-5
2310	98.4205907843399	98.6647111922253	64.5284339938146	4.21655201216711E-5
2380	98.4277517936531	98.5944553320462	61.4360837134795	4.17380276953098E-5
2450	98.4765542068686	98.7174084345187	69.7842440020797	4.1412128929686E-5
2520	98.4514224925803	98.6725791303582	68.1178064237564	4.01639485912292E-5
2590	98.5067904866073	98.720220446127	72.1729700452088	4.25340176592384E-5
2660	98.5158274773836	98.7328279572795	72.1039323567698	4.34315493974586E-5
2730	98.5651464945625	98.780140689297	83.2713345332793	4.39705457956915E-5
2800	98.567069592718	98.7621936290034	78.8665964923935	4.32282064166467E-5
2870	98.580357874517	98.8322592147862	77.8076493364316	4.51525190293981E-5
2940	98.5872423678643	98.8032712804532	77.4244318885864	4.7319504548824E-5
3010	98.6272072031102	98.8464840687154	77.7011378196325	4.44047315735517E-5
3080	98.6446000368197	98.8401867520579	82.9247649183138	4.85122701632422E-5
3150	98.6477523232894	98.8381097536856	91.9094716107167	5.06259164164587E-5
3220	98.6720886422963	98.8663973352462	86.158535435666	5.00388212830351E-5
3290	98.672826367236	98.8434414681521	91.0546153423615	5.02437208572189E-5
3360	98.7121884535632	98.9164157966554	86.539218689521	4.87224621548904E-5
3430	98.7021463182976	98.9136607070136	97.1876468581896	5.05859119668017E-5
3500	98.7304168172311	98.9221793736815	99.7490481123844	4.9732691253234E-5
3570	98.7518070958492	98.9047152245263	98.0136824503425	5.08549431879065E-5
3640	98.7517572431088	98.9292297202492	105.719159748241	5.21595759793165E-5
3710	98.7694321403446	98.9410066389565	104.697073502867	5.31646683195329E-5
3780	98.7895863712032	98.9630232817145	107.867857840889	5.13698123888754E-5
3850	98.7887496285119	98.9462066409776	111.529216811678	5.38732296224081E-5
3920	98.7951426495406	98.9737135596313	118.129741330305	5.49208169616766E-5
3990	98.8094042419514	98.9487169420868	121.568437417365	5.38545505019457E-5
4060	98.8369035337924	98.974780386179	116.855277313994	5.54467898620315E-5
4130	98.8405375541891	98.9793789944991	121.273175841484	6.51627862570152E-5
4200	98.8349651197965	98.9838095541861	137.323861765198	6.99736456185623E-5
4270	98.8551766133304	99.0153041965458	128.993532810518	6.73110926559787E-5
4340	98.869891014974	99.0379091223605	135.614271607651	6.89649731135905E-5
4410	98.8685812965362	99.0181067520283	142.452888237676	6.94710735052312E-5
4480	98.8896545155489	99.0372333734756	142.784143339469	6.99669522670632E-5
4550	98.9066067603778	99.0377599972027	164.064123871218	6.92096695916485E-5
4620	98.9041833863464	99.0272521436069	169.295381400156	7.06638391196494E-5
4690	98.9194381746034	99.0194820349748	165.840109962405	7.71556117770331E-5
4760	98.9158481516095	99.0584617156852	167.034930436771	7.12585615605952E-5
4830	98.929778739924	99.0540591711188	169.562161078061	7.34006934725169E-5
