# Supplementary material for: Terrain Referenced Navigation Using a Multilayer Radial Basis Function-Based Extreme Learning Machine
Source: Hindawi journal article supplement (doi:10.1155/2019/9142694), 2019-07-11
Supplement: f1 [file 9142694.f1.zip › 9142694_Supplementary information files/CompareMatchingResults_180909/ELMTestResult.dat]

127.174444 35.700556 504.578592 
 127.174444 35.700667 500.640120 
 127.174444 35.700778 496.774313 
 127.174556 35.700778 490.578108 
 127.174556 35.700889 486.770222 
 127.174556 35.701000 483.033926 
 127.174556 35.701111 479.356057 
 127.174667 35.701111 473.446574 
 127.174667 35.701222 469.837014 
 127.174667 35.701333 466.285260 
 127.174667 35.701445 462.797284 
 127.174778 35.701445 457.156961 
 127.174778 35.701556 453.734523 
 127.174778 35.701667 450.369090 
 127.174778 35.701778 447.071939 
 127.174889 35.701889 438.455867 
 127.174889 35.702000 435.277541 
 127.174889 35.702111 432.155252 
 127.174889 35.702222 429.099444 
 127.175000 35.702222 423.975949 
 127.175000 35.702333 420.969221 
 127.175000 35.702445 418.022970 
 127.175000 35.702556 415.141820 
 127.175111 35.702556 410.270488 
 127.175111 35.702667 407.436389 
 127.175111 35.702778 404.666416 
 127.175111 35.702889 401.950759 
 127.175222 35.702889 397.316127 
 127.175222 35.703000 394.654753 
 127.175222 35.703111 392.047108 
 127.175222 35.703222 389.497553 
 127.175333 35.703222 385.099184 
 127.175333 35.703333 382.601370 
 127.175333 35.703445 380.156536 
 127.175333 35.703556 377.772819 
 127.175444 35.703556 373.596234 
 127.175444 35.703667 371.253614 
 127.175444 35.703778 368.971189 
 127.175444 35.703889 366.740838 
 127.175556 35.703889 362.785087 
 127.175556 35.704000 360.601506 
 127.175556 35.704111 358.469435 
 127.175556 35.704222 356.392423 
 127.175667 35.704222 352.643924 
 127.175667 35.704333 350.611245 
 127.175667 35.704444 348.629355 
 127.175667 35.704555 346.704814 
 127.175778 35.704555 343.162208 
 127.175778 35.704667 341.273067 
 127.175778 35.704778 339.440406 
 127.175778 35.704889 337.657668 
 127.175889 35.704889 334.308218 
 127.175889 35.705000 332.562127 
 127.175889 35.705111 330.871324 
 127.175889 35.705222 329.229746 
 127.176000 35.705222 326.071659 
 127.176000 35.705333 324.467391 
 127.176000 35.705444 322.911811 
 127.176000 35.705555 321.410024 
 127.176111 35.705555 318.431439 
 127.176111 35.705667 316.959570 
 127.176111 35.705778 315.538279 
 127.176111 35.705889 314.169644 
 127.176222 35.705889 311.368372 
 127.176222 35.706000 310.027897 
 127.176222 35.706111 308.739279 
 127.176222 35.706222 307.497851 
 127.176333 35.706222 304.862772 
 127.176333 35.706333 303.651961 
 127.176333 35.706444 302.487823 
 127.176333 35.706555 301.374134 
 127.176444 35.706555 298.902803 
 127.176444 35.706667 297.813812 
 127.176444 35.706778 296.772754 
 127.176444 35.706889 295.781076 
 127.176556 35.706889 293.463067 
 127.176556 35.707000 292.494375 
 127.176556 35.707111 291.574312 
 127.176556 35.707222 290.699494 
 127.176667 35.707222 288.532038 
 127.176667 35.707333 287.681524 
 127.176667 35.707444 286.875760 
 127.176667 35.707556 286.116037 
 127.176778 35.707556 284.089429 
 127.176778 35.707667 283.351956 
 127.176778 35.707778 282.658613 
 127.176778 35.707889 282.011572 
 127.176889 35.707889 280.122838 
 127.176889 35.708000 279.493877 
 127.176889 35.708111 278.910519 
 127.176889 35.708222 278.370551 
 127.177000 35.708222 276.610588 
 127.177000 35.708333 276.088055 
 127.177000 35.708444 275.610158 
 127.177111 35.708444 274.003304 
 127.177111 35.708556 273.540631 
 127.177111 35.708667 273.121920 
 127.177111 35.708778 272.745534 
 127.177222 35.708778 271.256742 
 127.177222 35.708889 270.895282 
 127.177222 35.709000 270.575684 
 127.177222 35.709111 270.298855 
 127.177333 35.709111 268.924708 
 127.177333 35.709222 268.660039 
 127.177333 35.709333 268.437149 
 127.177333 35.709444 268.256128 
 127.177444 35.709444 266.988714 
 127.177444 35.709556 266.818332 
 127.177444 35.709667 266.689192 
 127.177444 35.709778 266.600663 
 127.177556 35.709778 265.436367 
 127.177556 35.709889 265.357322 
 127.177556 35.710000 265.318448 
 127.177556 35.710111 265.319739 
 127.177667 35.710111 264.251226 
 127.177667 35.710222 264.260223 
 127.177667 35.710333 264.308849 
 127.177667 35.710444 264.396763 
 127.177778 35.710444 263.420358 
 127.177778 35.710556 263.514602 
 127.177778 35.710667 263.647550 
 127.177778 35.710778 263.819491 
 127.177889 35.710778 262.928297 
 127.177889 35.710889 263.104547 
 127.177889 35.711000 263.319370 
 127.178000 35.711111 262.762531 
 127.178000 35.711222 263.018180 
 127.178000 35.711333 263.311888 
 127.178111 35.711333 262.612620 
 127.178111 35.711444 262.907755 
 127.178111 35.711556 263.240543 
 127.178111 35.711667 263.609682 
 127.178222 35.711667 262.982414 
 127.178222 35.711778 263.352692 
 127.178222 35.711889 263.759523 
 127.178222 35.712000 264.201958 
 127.178333 35.712000 263.640702 
 127.178333 35.712111 264.082945 
 127.178333 35.712222 264.560279 
 127.178333 35.712333 265.074195 
 127.178444 35.712333 264.574985 
 127.178444 35.712444 265.085697 
 127.178444 35.712556 265.632606 
 127.178444 35.712667 266.214717 
 127.178556 35.712667 265.772013 
 127.178556 35.712778 266.349402 
 127.178556 35.712889 266.962523 
 127.178667 35.712889 266.611715 
 127.178667 35.713000 267.219031 
 127.178667 35.713111 267.861706 
 127.178667 35.713222 268.537392 
 127.178778 35.713222 268.234800 
 127.178778 35.713333 268.905535 
 127.178778 35.713444 269.608818 
 127.178778 35.713556 270.346935 
 127.178889 35.713556 270.088336 
 127.178889 35.713667 270.819072 
 127.178889 35.713778 271.581714 
 127.178889 35.713889 272.378754 
 127.179000 35.713889 272.159851 
 127.179000 35.714000 272.946891 
 127.179000 35.714111 273.767979 
 127.179111 35.714111 273.626335 
 127.179111 35.714222 274.436369 
 127.179111 35.714333 275.280102 
 127.179111 35.714445 276.156043 
 127.179222 35.714445 276.046176 
 127.179222 35.714556 276.909785 
 127.179222 35.714667 277.806683 
 127.179222 35.714778 278.733668 
 127.179333 35.714778 278.651327 
 127.179333 35.714889 279.567834 
 127.179333 35.715000 280.514028 
 127.179444 35.715000 280.499369 
 127.179444 35.715111 281.434227 
 127.179444 35.715222 282.400069 
 127.179444 35.715333 283.395039 
 127.179556 35.715333 283.400537 
 127.179556 35.715445 284.383075 
 127.179556 35.715556 285.394363 
 127.179556 35.715667 286.437772 
 127.179667 35.715667 286.459516 
 127.179667 35.715778 287.485928 
 127.179667 35.715889 288.544148 
 127.179778 35.715889 288.624417 
 127.179778 35.716000 289.664712 
 127.179778 35.716111 290.736505 
 127.179778 35.716222 291.837926 
 127.179889 35.716222 291.927467 
 127.179889 35.716333 293.009853 
 127.179889 35.716444 294.123381 
 127.179889 35.716556 295.264125 
 127.180000 35.716556 295.359491 
 127.180000 35.716667 296.483940 
 127.180000 35.716778 297.635272 
 127.180111 35.716778 297.780455 
 127.180111 35.716889 298.914732 
 127.180111 35.717000 300.077592 
 127.180111 35.717111 301.266869 
 127.180222 35.717111 301.411359 
 127.180222 35.717222 302.582604 
 127.180222 35.717333 303.779954 
 127.180222 35.717444 305.007439 
 127.180333 35.717444 305.147577 
 127.180333 35.717555 306.351968 
 127.180333 35.717667 307.586220 
 127.180444 35.717667 307.768390 
 127.180444 35.717778 308.978736 
 127.180444 35.717889 310.218671 
 127.180444 35.718000 311.486050 
 127.180556 35.718000 311.657784 
 127.180556 35.718111 312.900304 
 127.180556 35.718222 314.172111 
 127.180667 35.718222 314.381026 
 127.180667 35.718333 315.627198 
 127.180667 35.718444 316.902398 
 127.180667 35.718555 318.202164 
 127.180778 35.718555 318.394927 
 127.180778 35.718667 319.672585 
 127.180778 35.718778 320.976813 
 127.180889 35.718778 321.202038 
 127.180889 35.718889 322.478985 
 127.180889 35.719000 323.784427 
 127.180889 35.719111 325.113805 
 127.181000 35.719111 325.317345 
 127.181000 35.719222 326.623114 
 127.181000 35.719333 327.952578 
 127.181111 35.719444 329.489402 
 127.181111 35.719556 330.820320 
 127.181111 35.719667 332.174589 
 127.181222 35.719667 332.379225 
 127.181222 35.719778 333.708446 
 127.181222 35.719889 335.060796 
 127.181333 35.720000 336.615989 
 127.181333 35.720111 337.965524 
 127.181333 35.720222 339.342555 
 127.181444 35.720222 339.539079 
 127.181444 35.720333 340.885006 
 127.181444 35.720444 342.258212 
 127.181444 35.720556 343.656344 
 127.181556 35.720556 343.818471 
 127.181556 35.720667 345.184669 
 127.181556 35.720778 346.577920 
 127.181667 35.720778 346.757587 
 127.181667 35.720889 348.118366 
 127.181667 35.721000 349.505993 
 127.181778 35.721000 349.701816 
 127.181778 35.721111 351.056362 
 127.181778 35.721222 352.437554 
 127.181778 35.721333 353.843031 
 127.181889 35.721333 353.997549 
 127.181889 35.721444 355.369261 
 127.181889 35.721556 356.767416 
 127.182000 35.721556 356.934503 
 127.182000 35.721667 358.298314 
 127.182000 35.721778 359.688378 
 127.182000 35.721889 361.099872 
 127.182111 35.721889 361.221490 
 127.182111 35.722000 362.602801 
 127.182111 35.722111 364.005389 
 127.182222 35.722111 364.136185 
 127.182222 35.722222 365.508009 
 127.182222 35.722333 366.903384 
 127.182222 35.722444 368.319809 
 127.182333 35.722444 368.401014 
 127.182333 35.722556 369.786119 
 127.182333 35.722667 371.192139 
 127.182444 35.722667 371.279322 
 127.182444 35.722778 372.653465 
 127.182444 35.722889 374.048393 
 127.182444 35.723000 375.468874 
 127.182556 35.723000 375.502672 
 127.182556 35.723111 376.888330 
 127.182556 35.723222 378.294579 
 127.182667 35.723222 378.331342 
 127.182667 35.723333 379.704657 
 127.182667 35.723444 381.098448 
 127.182778 35.723444 381.136865 
 127.182778 35.723556 382.497291 
 127.182778 35.723667 383.878085 
 127.182778 35.723778 385.283972 
 127.182889 35.723778 385.263917 
 127.182889 35.723889 386.633474 
 127.182889 35.724000 388.023232 
 127.183000 35.724000 388.002176 
 127.183000 35.724111 389.357592 
 127.183000 35.724222 390.733118 
 127.183111 35.724333 392.050591 
 127.183111 35.724444 393.411308 
 127.183111 35.724556 394.796710 
 127.183222 35.724556 394.710366 
 127.183222 35.724667 396.055806 
 127.183222 35.724778 397.425802 
 127.183333 35.724778 397.334806 
 127.183333 35.724889 398.666731 
 127.183333 35.725000 400.018471 
 127.183333 35.725111 401.394662 
 127.183444 35.725111 401.237597 
 127.183444 35.725222 402.572986 
 127.183444 35.725333 403.932705 
 127.183556 35.725333 403.768670 
 127.183556 35.725444 405.087197 
 127.183556 35.725556 406.429939 
 127.183667 35.725556 406.258263 
 127.183667 35.725667 407.561788 
 127.183667 35.725778 408.884900 
 127.183667 35.725889 410.232143 
 127.183778 35.725889 409.990174 
 127.183778 35.726000 411.295468 
 127.183778 35.726111 412.624788 
 127.183889 35.726111 412.373225 
 127.183889 35.726222 413.660338 
 127.183889 35.726333 414.971374 
 127.184000 35.726333 414.709007 
 127.184000 35.726445 415.979693 
 127.184000 35.726556 417.269802 
 127.184000 35.726667 418.583772 
 127.184111 35.726667 418.247953 
 127.184111 35.726778 419.519038 
 127.184111 35.726889 420.813893 
 127.184222 35.726889 420.465427 
 127.184222 35.727000 421.717075 
 127.184222 35.727111 422.992405 
 127.184333 35.727111 422.630891 
 127.184333 35.727222 423.862752 
 127.184333 35.727333 425.118210 
 127.184444 35.727333 424.743227 
 127.184444 35.727445 425.957115 
 127.184444 35.727556 427.190315 
 127.184444 35.727667 428.447075 
 127.184556 35.727667 427.994038 
 127.184556 35.727778 429.206748 
 127.184556 35.727889 430.442947 
 127.184667 35.727889 429.975033 
 127.184667 35.728000 431.166999 
 127.184667 35.728111 432.382383 
 127.184778 35.728111 431.898288 
 127.184778 35.728222 433.071201 
 127.184778 35.728333 434.263399 
 127.184778 35.728445 435.478997 
 127.184889 35.728445 434.914905 
 127.184889 35.728556 436.085761 
 127.184889 35.728667 437.279958 
 127.185000 35.728667 436.698346 
 127.185000 35.728778 437.847548 
 127.185000 35.728889 439.020034 
 127.185111 35.728889 438.421343 
 127.185111 35.729000 439.548691 
 127.185111 35.729111 440.699272 
 127.185222 35.729111 440.082120 
 127.185222 35.729222 441.189247 
 127.185222 35.729333 442.315717 
 127.185222 35.729444 443.465426 
 127.185333 35.729444 442.765435 
 127.185333 35.729555 443.869582 
 127.185333 35.729667 444.996925 
 127.185444 35.729667 444.277400 
 127.185444 35.729778 445.358963 
 127.185444 35.729889 446.463684 
 127.185556 35.729889 445.725404 
 127.185556 35.730000 446.786078 
 127.185556 35.730111 447.866193 
 127.185667 35.730111 447.107680 
 127.185667 35.730222 448.145348 
 127.185667 35.730333 449.202504 
 127.185667 35.730444 450.282811 
 127.185778 35.730444 449.439194 
 127.185778 35.730555 450.473270 
 127.185778 35.730667 451.530472 
 127.185889 35.730667 450.665796 
 127.185889 35.730778 451.678340 
 127.185889 35.730889 452.710471 
 127.186000 35.730889 451.825859 
 127.186000 35.731000 452.814976 
 127.186000 35.731111 453.823740 
 127.186111 35.731111 452.917599 
 127.186111 35.731222 453.883098 
 127.186111 35.731333 454.868310 
 127.186222 35.731333 453.941881 
 127.186222 35.731444 454.883686 
 127.186222 35.731555 455.845274 
 127.186222 35.731667 456.829988 
 127.186333 35.731667 455.814893 
 127.186333 35.731778 456.754324 
 127.186333 35.731889 457.713608 
 127.186444 35.731889 456.677857 
 127.186444 35.732000 457.593406 
 127.186444 35.732111 458.528888 
 127.186556 35.732111 457.470756 
 127.186556 35.732222 458.362278 
 127.186556 35.732333 459.273814 
 127.186667 35.732333 458.194886 
 127.186667 35.732444 459.062350 
 127.186667 35.732556 459.951460 
 127.186778 35.732556 458.849876 
 127.186778 35.732667 459.691725 
 127.186778 35.732778 460.556698 
 127.186889 35.732889 460.251969 
 127.186889 35.733000 461.092797 
 127.186889 35.733111 461.953913 
 127.187000 35.733111 460.741202 
 127.187000 35.733222 461.557781 
 127.187000 35.733333 462.396204 
 127.187111 35.733333 461.162484 
 127.187111 35.733444 461.953481 
 127.187111 35.733556 462.767725 
 127.187222 35.733556 461.511223 
 127.187222 35.733667 462.277936 
 127.187222 35.733778 463.067917 
 127.187333 35.733778 461.790668 
 127.187333 35.733889 462.533125 
 127.187333 35.734000 463.298875 
 127.187444 35.734000 461.998965 
 127.187444 35.734111 462.717097 
 127.187444 35.734222 463.458548 
 127.187556 35.734222 462.138125 
 127.187556 35.734333 462.833191 
 127.187556 35.734444 463.549179 
 127.187556 35.734556 464.288606 
 127.187667 35.734556 462.876994 
 127.187667 35.734667 463.568724 
 127.187667 35.734778 464.283927 
 127.187778 35.734778 462.852028 
 127.187778 35.734889 463.519565 
 127.187778 35.735000 464.210614 
 127.187889 35.735000 462.756356 
 127.187889 35.735111 463.400792 
 127.187889 35.735222 464.066526 
 127.188000 35.735222 462.592382 
 127.188000 35.735333 463.212629 
 127.188000 35.735444 463.854302 
 127.188111 35.735444 462.358171 
 127.188111 35.735556 462.954210 
 127.188111 35.735667 463.571804 
 127.188222 35.735667 462.056263 
 127.188222 35.735778 462.628190 
 127.188222 35.735889 463.221803 
 127.188333 35.735889 461.684725 
 127.188333 35.736000 462.232533 
 127.188333 35.736111 462.803163 
 127.188333 35.736222 463.395637 
 127.188444 35.736222 461.770024 
 127.188444 35.736333 462.316743 
 127.188444 35.736444 462.885444 
 127.188556 35.736444 461.238630 
 127.188556 35.736556 461.761448 
 127.188556 35.736667 462.306389 
 127.188667 35.736667 460.641258 
 127.188667 35.736778 461.140302 
 127.188667 35.736889 461.662530 
 127.188778 35.736889 459.976670 
 127.188778 35.737000 460.451167 
 127.188778 35.737111 460.949750 
 127.188889 35.737111 459.246262 
 127.188889 35.737222 459.697189 
 127.188889 35.737333 460.172269 
 127.189000 35.737333 458.448833 
 127.189000 35.737444 458.876225 
 127.189000 35.737556 459.327841 
 127.189111 35.737556 457.587527 
 127.189111 35.737667 457.992253 
 127.189111 35.737778 458.419842 
 127.189222 35.737778 456.660305 
 127.189222 35.737889 457.041656 
 127.189222 35.738000 457.446025 
 127.189333 35.738111 456.028560 
 127.189333 35.738222 456.409875 
 127.189333 35.738333 456.815750 
 127.189444 35.738333 454.950819 
 127.189444 35.738444 455.309140 
 127.189444 35.738556 455.692102 
 127.189556 35.738556 453.811908 
 127.189556 35.738667 454.148009 
 127.189556 35.738778 454.507639 
 127.189667 35.738778 452.609674 
 127.189667 35.738889 452.922990 
 127.189667 35.739000 453.259999 
 127.189778 35.739000 451.346243 
 127.189778 35.739111 451.636905 
 127.189778 35.739222 451.951425 
 127.189889 35.739222 450.023810 
 127.189889 35.739333 450.292011 
 127.189889 35.739445 450.584761 
 127.190000 35.739445 448.640622 
 127.190000 35.739556 448.886044 
 127.190000 35.739667 449.156550 
 127.190111 35.739667 447.199550 
 127.190111 35.739778 447.422836 
 127.190111 35.739889 447.671300 
 127.190222 35.739889 445.698874 
 127.190222 35.740000 445.900118 
 127.190222 35.740111 446.126637 
 127.190333 35.740111 444.142394 
 127.190333 35.740222 444.321805 
 127.190333 35.740333 444.526592 
 127.190444 35.740333 442.527948 
 127.190444 35.740445 442.685922 
 127.190444 35.740556 442.868787 
 127.190556 35.740556 440.859413 
 127.190556 35.740667 440.995839 
 127.190556 35.740778 441.157333 
 127.190556 35.740889 441.344534 
 127.190667 35.740889 439.249614 
 127.190667 35.741000 439.389849 
 127.190667 35.741111 439.555898 
 127.190778 35.741111 437.451317 
 127.190778 35.741222 437.570747 
 127.190778 35.741333 437.715647 
 127.190889 35.741333 435.598672 
 127.190889 35.741445 435.697154 
 127.190889 35.741556 435.821288 
 127.191000 35.741556 433.695818 
 127.191000 35.741667 433.773586 
 127.191000 35.741778 433.877191 
 127.191111 35.741778 431.740479 
 127.191111 35.741889 431.797659 
 127.191111 35.742000 431.881026 
 127.191222 35.742000 429.736893 
 127.191222 35.742111 429.773687 
 127.191222 35.742222 429.836860 
 127.191333 35.742222 427.682673 
 127.191333 35.742333 427.699286 
 127.191333 35.742444 427.742397 
 127.191444 35.742444 425.582147 
 127.191444 35.742555 425.578827 
 127.191444 35.742667 425.602126 
 127.191556 35.742667 423.433045 
 127.191556 35.742778 423.409927 
 127.191556 35.742889 423.413551 
 127.191667 35.742889 421.239668 
 127.191667 35.743000 421.196956 
 127.191667 35.743111 421.181211 
 127.191778 35.743111 418.999751 
 127.191778 35.743222 418.937603 
 127.191778 35.743333 418.902613 
 127.191889 35.743333 416.717639 
 127.191889 35.743444 416.636313 
 127.191889 35.743555 416.582338 
 127.192000 35.743555 414.391071 
 127.192000 35.743667 414.290712 
 127.192000 35.743778 414.217797 
 127.192111 35.743778 412.024201 
 127.192111 35.743889 411.905300 
 127.192111 35.744000 411.813778 
 127.192222 35.744000 409.615201 
 127.192222 35.744111 409.477710 
 127.192222 35.744222 409.367732 
 127.192333 35.744222 407.168286 
 127.192333 35.744333 407.012473 
 127.192333 35.744444 406.884305 
 127.192444 35.744444 404.681213 
 127.192444 35.744556 404.506954 
 127.192444 35.744667 404.361026 
 127.192556 35.744778 401.966227 
 127.192556 35.744889 401.802566 
 127.192556 35.745000 401.666967 
 127.192667 35.745000 399.387701 
 127.192667 35.745111 399.206463 
 127.192667 35.745222 399.053426 
 127.192778 35.745222 396.775948 
 127.192778 35.745333 396.577405 
 127.192778 35.745444 396.407205 
 127.192889 35.745444 394.128634 
 127.192889 35.745556 393.912599 
 127.192889 35.745667 393.725741 
 127.193000 35.745667 391.450341 
 127.193000 35.745778 391.217407 
 127.193000 35.745889 391.013852 
 127.193111 35.745889 388.738751 
 127.193111 35.746000 388.489078 
 127.193111 35.746111 388.268987 
 127.193222 35.746111 385.998451 
 127.193222 35.746222 385.732318 
 127.193222 35.746333 385.495587 
 127.193333 35.746333 383.226630 
 127.193333 35.746444 382.944709 
 127.193333 35.746556 382.691855 
 127.193444 35.746556 380.428867 
 127.193444 35.746667 380.130955 
 127.193444 35.746778 379.862258 
 127.193556 35.746778 377.602400 
 127.193556 35.746889 377.288659 
 127.193556 35.747000 377.004282 
 127.193667 35.747000 374.751805 
 127.193667 35.747111 374.422515 
 127.193667 35.747222 374.122741 
 127.193778 35.747222 371.874825 
 127.193778 35.747333 371.529583 
 127.193778 35.747444 371.215142 
 127.193889 35.747444 368.976024 
 127.193889 35.747556 368.615651 
 127.193889 35.747667 368.286284 
 127.194000 35.747667 366.053169 
 127.194000 35.747778 365.677828 
 127.194000 35.747889 365.333699 
 127.194111 35.747889 363.110803 
 127.194111 35.748000 362.720776 
 127.194111 35.748111 362.361575 
 127.194222 35.748111 360.146000 
 127.194222 35.748222 359.742171 
 127.194222 35.748333 359.368627 
 127.194333 35.748333 357.164694 
 127.194333 35.748444 356.746647 
 127.194333 35.748556 356.359044 
 127.194444 35.748556 354.164014 
 127.194444 35.748667 353.731911 
 127.194444 35.748778 353.330410 
 127.194556 35.748778 351.148444 
 127.194556 35.748889 350.701825 
 127.194556 35.749000 350.287448 
 127.194667 35.749000 348.115842 
 127.194667 35.749111 347.655585 
 127.194667 35.749222 347.227775 
 127.194778 35.749333 344.597037 
 127.194778 35.749444 344.156075 
 127.194778 35.749556 343.746355 
 127.194889 35.749556 341.523956 
 127.194889 35.749667 341.070001 
 127.194889 35.749778 340.647450 
 127.195000 35.749778 338.440858 
 127.195000 35.749889 337.973414 
 127.195000 35.750000 337.539087 
 127.195111 35.750000 335.345558 
 127.195111 35.750111 334.865535 
 127.195111 35.750222 334.418836 
 127.195222 35.750222 332.240881 
 127.195222 35.750333 331.748496 
 127.195222 35.750444 331.289642 
 127.195333 35.750444 329.129601 
 127.195333 35.750556 328.625132 
 127.195333 35.750667 328.153617 
 127.195444 35.750667 326.008679 
 127.195444 35.750778 325.493194 
 127.195444 35.750889 325.009934 
 127.195556 35.750889 322.884303 
 127.195556 35.751000 322.357181 
 127.195556 35.751111 321.862451 
 127.195667 35.751111 319.753501 
 127.195667 35.751222 319.214892 
 127.195667 35.751333 318.708843 
 127.195778 35.751333 316.620583 
 127.195778 35.751444 316.070760 
 127.195778 35.751556 315.553663 
 127.195889 35.751556 313.483520 
 127.195889 35.751667 312.921694 
 127.195889 35.751778 312.394633 
 127.196000 35.751778 310.346552 
 127.196000 35.751889 309.773908 
 127.196000 35.752000 309.236236 
 127.196111 35.752000 307.207701 
 127.196111 35.752111 306.624384 
 127.196111 35.752222 306.076244 
 127.196222 35.752222 304.071127 
 127.196222 35.752333 303.477403 
 127.196222 35.752445 302.918130 
 127.196333 35.752445 300.933842 
 127.196333 35.752556 300.330918 
 127.196333 35.752667 299.761566 
 127.196444 35.752667 297.802038 
 127.196444 35.752778 297.189128 
 127.196444 35.752889 296.609960 
 127.196556 35.752889 294.672803 
 127.196556 35.753000 294.050043 
 127.196556 35.753111 293.461194 
 127.196667 35.753111 291.550124 
 127.196667 35.753222 290.916713 
 127.196667 35.753333 290.319501 
 127.196667 35.753445 289.756544 
 127.196778 35.753445 287.789309 
 127.196778 35.753556 287.182823 
 127.196778 35.753667 286.610765 
 127.196889 35.753667 284.670805 
 127.196889 35.753778 284.055301 
 127.196889 35.753889 283.474396 
 127.197000 35.753889 281.559334 
 127.197000 35.754000 280.934937 
 127.197000 35.754111 280.345312 
 127.197111 35.754111 278.458811 
 127.197111 35.754222 277.824714 
 127.197111 35.754333 277.227679 
 127.197222 35.754333 275.367436 
 127.197222 35.754444 274.724804 
 127.197222 35.754555 274.119437 
 127.197333 35.754555 272.289019 
 127.197333 35.754667 271.638099 
 127.197333 35.754778 271.024645 
 127.197444 35.754778 269.221829 
 127.197444 35.754889 268.562738 
 127.197444 35.755000 267.940275 
 127.197556 35.755000 266.168388 
 127.197556 35.755111 265.502545 
 127.197556 35.755222 264.872340 
 127.197667 35.755222 263.129379 
 127.197667 35.755333 262.455732 
 127.197667 35.755444 261.817896 
 127.197778 35.755444 260.107224 
 127.197778 35.755555 259.426008 
 127.197778 35.755667 258.780777 
 127.197889 35.755667 257.100338 
 127.197889 35.755778 256.410506 
 127.197889 35.755889 255.759139 
 127.198000 35.755889 254.112186 
 127.198000 35.756000 253.415110 
 127.198000 35.756111 252.756698 
 127.198111 35.756111 251.141262 
 127.198111 35.756222 250.437043 
 127.198111 35.756333 249.771684 
 127.198222 35.756333 248.190907 
 127.198222 35.756444 247.479769 
 127.198222 35.756555 246.807690 
 127.198333 35.756555 245.259695 
 127.198333 35.756667 244.541733 
 127.198333 35.756778 243.861892 
 127.198444 35.756778 242.349559 
 127.198444 35.756889 241.626272 
 127.198444 35.757000 240.940012 
 127.198556 35.757000 239.461702 
 127.198556 35.757111 238.731911 
 127.198556 35.757222 238.039320 
 127.198667 35.757333 235.861853 
 127.198667 35.757444 235.163147 
 127.198667 35.757556 234.503230 
 127.198778 35.757556 233.013468 
 127.198778 35.757667 232.309971 
 127.198778 35.757778 231.644203 
 127.198889 35.757778 230.192298 
 127.198889 35.757889 229.482984 
 127.198889 35.758000 228.811574 
 127.199000 35.758000 227.395811 
 127.199000 35.758111 226.680755 
 127.199000 35.758222 226.003777 
 127.199111 35.758222 224.626929 
 127.199111 35.758333 223.906334 
 127.199111 35.758444 223.223989 
 127.199222 35.758444 221.884447 
 127.199222 35.758556 221.157163 
 127.199222 35.758667 220.470735 
 127.199333 35.758667 219.171139 
 127.199333 35.758778 218.438570 
 127.199333 35.758889 217.747047 
 127.199444 35.758889 216.485894 
 127.199444 35.759000 215.748100 
 127.199444 35.759111 215.051544 
 127.199556 35.759111 213.831336 
 127.199556 35.759222 213.088509 
 127.199556 35.759333 212.385935 
 127.199667 35.759333 211.205133 
 127.199667 35.759444 210.458644 
 127.199667 35.759556 209.751270 
 127.199778 35.759556 208.612384 
 127.199778 35.759667 207.861107 
 127.199778 35.759778 207.149116 
 127.199889 35.759778 206.050866 
 127.199889 35.759889 205.294845 
 127.199889 35.760000 204.578284 
 127.200000 35.760000 203.522888 
 127.200000 35.760111 202.761028 
 127.200000 35.760222 202.041347 
 127.200111 35.760222 201.027640 
 127.200111 35.760333 200.261247 
 127.200111 35.760444 199.537218 
 127.200222 35.760556 197.796515 
 127.200222 35.760667 197.068309 
 127.200222 35.760778 196.380262 
 127.200333 35.760778 195.365990 
 127.200333 35.760889 194.633637 
 127.200333 35.761000 193.941613 
 127.200444 35.761000 192.971785 
 127.200444 35.761111 192.234217 
 127.200444 35.761222 191.539612 
 127.200556 35.761222 190.613165 
 127.200556 35.761333 189.871630 
 127.200556 35.761444 189.173242 
 127.200667 35.761444 188.291471 
 127.200667 35.761556 187.546058 
 127.200667 35.761667 186.843973 
 127.200778 35.761667 186.007891 
 127.200778 35.761778 185.258753 
 127.200778 35.761889 184.551946 
 127.200889 35.761889 183.760523 
 127.200889 35.762000 183.009002 
 127.200889 35.762111 182.298657 
 127.201000 35.762111 181.553710 
 127.201000 35.762222 180.798628 
 127.201000 35.762333 180.084892 
 127.201111 35.762333 179.385669 
 127.201111 35.762444 178.627032 
 127.201111 35.762556 177.909907 
 127.201222 35.762556 177.257914 
 127.201222 35.762667 176.494585 
 127.201222 35.762778 175.775486 
 127.201333 35.762778 175.170102 
 127.201333 35.762889 174.403348 
 127.201333 35.763000 173.681001 
 127.201444 35.763000 173.123567 
 127.201444 35.763111 172.353520 
 127.201444 35.763222 171.628058 
 127.201444 35.763333 170.944798 
 127.201556 35.763333 170.344733 
 127.201556 35.763444 169.616143 
 127.201556 35.763556 168.929921 
 127.201667 35.763556 168.378277 
 127.201667 35.763667 167.645463 
 127.201667 35.763778 166.957626 
 127.201778 35.763778 166.453902 
 127.201778 35.763889 165.718061 
 127.201778 35.764000 165.027371 
 127.201889 35.764000 164.572715 
 127.201889 35.764111 163.833964 
 127.201889 35.764222 163.140539 
 127.202000 35.764222 162.734587 
 127.202000 35.764333 161.992900 
 127.202000 35.764445 161.295551 
 127.202111 35.764445 160.939122 
 127.202111 35.764556 160.195927 
 127.202111 35.764667 159.495921 
 127.202222 35.764667 159.188946 
 127.202222 35.764778 158.442894 
 127.202222 35.764889 157.740194 
 127.202333 35.764889 157.483478 
 127.202333 35.765000 156.734674 
 127.202333 35.765111 156.029384 
 127.202444 35.765111 155.822840 
 127.202444 35.765222 155.071241 
 127.202444 35.765333 154.363316 
 127.202556 35.765445 153.452018 
 127.202556 35.765556 152.742815 
 127.202556 35.765667 152.077638 
 127.202667 35.765667 151.879620 
 127.202667 35.765778 151.167831 
 127.202667 35.765889 150.500229 
 127.202778 35.765889 150.353285 
 127.202778 35.766000 149.639000 
 127.202778 35.766111 148.969061 
 127.202889 35.766111 148.873241 
 127.202889 35.766222 148.155205 
 127.202889 35.766333 147.484063 
 127.203000 35.766333 147.439788 
 127.203000 35.766445 146.719275 
 127.203000 35.766556 146.045821 
 127.203111 35.766556 146.053285 
 127.203111 35.766667 145.330226 
 127.203111 35.766778 144.654392 
 127.203222 35.766778 144.713837 
 127.203222 35.766889 143.988309 
 127.203222 35.767000 143.309043 
 127.203333 35.767000 143.420645 
 127.203333 35.767111 142.693861 
 127.203333 35.767222 142.012210 
 127.203444 35.767222 142.176194 
 127.203444 35.767333 141.446939 
 127.203444 35.767444 140.762970 
 127.203444 35.767555 140.126752 
 127.203556 35.767555 140.248013 
 127.203556 35.767667 139.561642 
 127.203556 35.767778 138.923185 
 127.203667 35.767778 139.096941 
 127.203667 35.767889 138.408231 
 127.203667 35.768000 137.766533 
 127.203778 35.768000 137.993103 
 127.203778 35.768111 137.303188 
 127.203778 35.768222 136.659214 
 127.203889 35.768222 136.938609 
 127.203889 35.768333 136.246321 
 127.203889 35.768444 135.600127 
 127.204000 35.768444 135.932979 
 127.204000 35.768555 135.238218 
 127.204000 35.768667 134.589701 
 127.204111 35.768667 134.975675 
 127.204111 35.768778 134.277329 
 127.204111 35.768889 133.627697 
 127.204222 35.768889 134.067575 
 127.204222 35.769000 133.366692 
 127.204222 35.769111 132.714681 
 127.204333 35.769111 133.207943 
 127.204333 35.769222 132.504565 
 127.204333 35.769333 131.850216 
 127.204333 35.769444 131.242757 
 127.204444 35.769444 131.691807 
 127.204444 35.769555 131.035004 
 127.204444 35.769667 130.425239 
 127.204556 35.769667 130.927633 
 127.204556 35.769778 130.267317 
 127.204556 35.769889 129.656373 
 127.204667 35.769889 130.213041 
 127.204667 35.770000 129.550178 
 127.204667 35.770111 128.936842 
 127.204778 35.770111 129.547046 
 127.204778 35.770222 128.881663 
 127.204778 35.770333 128.265962 
 127.204889 35.770333 128.930786 
 127.204889 35.770444 128.262752 
 127.204889 35.770556 127.643532 
 127.205000 35.770556 128.361880 
 127.205000 35.770667 127.692412 
 127.205000 35.770778 127.070712 
 127.205111 35.770778 127.843994 
 127.205111 35.770889 127.171764 
 127.205111 35.771000 126.547444 
 127.205111 35.771111 125.973294 
 127.205222 35.771111 126.699573 
 127.205222 35.771222 126.072649 
 127.205222 35.771333 125.495096 
 127.205333 35.771333 126.275978 
 127.205333 35.771444 125.647427 
 127.205333 35.771556 125.067269 
 127.205444 35.771556 125.901788 
 127.205444 35.771667 125.270501 
 127.205444 35.771778 124.687747 
 127.205556 35.771778 125.577290 
 127.205556 35.771889 124.943111 
 127.205556 35.772000 124.357606 
 127.205667 35.772000 125.300849 
 127.205667 35.772111 124.663782 
 127.205667 35.772222 124.075529 
 127.205778 35.772222 125.074013 
 127.205778 35.772333 124.432839 
 127.205778 35.772444 123.842734 
 127.205889 35.772444 124.894950 
 127.205889 35.772556 124.250719 
 127.205889 35.772667 123.657705 
 127.205889 35.772778 123.113977 
 127.206000 35.772778 124.117894 
 127.206000 35.772889 123.521803 
 127.206000 35.773000 122.975135 
 127.206111 35.773000 124.033425 
 127.206111 35.773111 123.433177 
 127.206111 35.773222 122.884465 
 127.206222 35.773222 123.996183 
 127.206222 35.773333 123.392751 
 127.206222 35.773444 122.840999 
 127.206333 35.773444 124.007913 
 127.206333 35.773556 123.401116 
 127.206333 35.773667 122.846146 
 127.206444 35.773667 124.066444 
 127.206444 35.773778 123.456265 
 127.206444 35.773889 122.897141 
 127.206556 35.773889 124.172564 
 127.206556 35.774000 123.559916 
 127.206556 35.774111 122.997364 
 127.206667 35.774222 123.709864 
 127.206667 35.774333 123.143859 
 127.206667 35.774444 122.630137 
 127.206778 35.774444 123.907972 
 127.206778 35.774556 123.338323 
 127.206778 35.774667 122.821099 
 127.206889 35.774667 124.151839 
 127.206889 35.774778 123.578516 
 127.206889 35.774889 123.056910 
 127.207000 35.774889 124.442438 
 127.207000 35.775000 123.866279 
 127.207000 35.775111 123.340936 
 127.207111 35.775111 124.779236 
 127.207111 35.775222 124.199178 
 127.207111 35.775333 123.670064 
 127.207222 35.775333 125.163359 
 127.207222 35.775444 124.579197 
 127.207222 35.775556 124.046106 
 127.207333 35.775556 125.592016 
 127.207333 35.775667 125.002742 
 127.207333 35.775778 124.466604 
 127.207333 35.775889 123.981862 
 127.207444 35.775889 125.473871 
 127.207444 35.776000 124.933512 
 127.207444 35.776111 124.444676 
 127.207556 35.776111 125.988805 
 127.207556 35.776222 125.444181 
 127.207556 35.776333 124.951206 
 127.207667 35.776333 126.549816 
 127.207667 35.776444 126.000710 
 127.207667 35.776556 125.503377 
 127.207778 35.776556 127.153896 
 127.207778 35.776667 126.599353 
 127.207778 35.776778 126.098520 
 127.207889 35.776778 127.803463 
 127.207889 35.776889 127.244158 
 127.207889 35.777000 126.738703 
 127.208000 35.777000 128.495317 
 127.208000 35.777111 127.931199 
 127.208000 35.777222 127.421067 
 127.208000 35.777333 126.963276 
 127.208111 35.777333 128.662862 
 127.208111 35.777445 128.146985 
 127.208111 35.777556 127.685249 
 127.208222 35.777556 129.435931 
 127.208222 35.777667 128.915083 
 127.208222 35.777778 128.448513 
 127.208333 35.777778 130.252939 
 127.208333 35.777889 129.726884 
 127.208333 35.778000 129.255245 
 127.208444 35.778000 131.110483 
 127.208444 35.778111 130.579160 
 127.208444 35.778222 130.101615 
 127.208556 35.778222 132.010271 
 127.208556 35.778333 131.474409 
 127.208556 35.778445 130.991482 
 127.208667 35.778556 132.409216 
 127.208667 35.778667 131.920843 
 127.208667 35.778778 131.487307 
 127.208778 35.778778 133.386224 
 127.208778 35.778889 132.892158 
 127.208778 35.779000 132.453065 
 127.208889 35.779000 134.401838 
 127.208889 35.779111 133.902010 
 127.208889 35.779222 133.456571 
 127.209000 35.779222 135.457927 
 127.209000 35.779333 134.953002 
 127.209000 35.779444 134.501674 
 127.209111 35.779444 136.552536 
 127.209111 35.779555 136.041535 
 127.209111 35.779667 135.584246 
 127.209222 35.779667 137.687687 
 127.209222 35.779778 137.170356 
 127.209222 35.779889 136.706849 
 127.209222 35.780000 136.298209 
 127.209333 35.780000 138.334835 
 127.209333 35.780111 137.865888 
 127.209333 35.780222 137.451077 
 127.209444 35.780222 139.539556 
 127.209444 35.780333 139.064066 
 127.209444 35.780444 138.642822 
 127.209556 35.780444 140.779724 
 127.209556 35.780555 140.297611 
 127.209556 35.780667 139.869856 
 127.209667 35.780667 142.058370 
 127.209667 35.780778 141.568576 
 127.209667 35.780889 141.134837 
 127.209778 35.780889 143.371366 
 127.209778 35.781000 142.874591 
 127.209778 35.781111 142.434004 
 127.209889 35.781111 144.721885 
 127.209889 35.781222 144.217860 
 127.209889 35.781333 143.770156 
 127.209889 35.781444 143.377336 
 127.210000 35.781444 145.594267 
 127.210000 35.781555 145.139361 
 127.210000 35.781667 144.739445 
 127.210111 35.781667 147.006938 
 127.210111 35.781778 146.543808 
 127.210111 35.781889 146.137272 
 127.210222 35.781889 148.451587 
 127.210222 35.782000 147.980882 
 127.210222 35.782111 147.566902 
 127.210333 35.782111 149.931481 
 127.210333 35.782222 149.452924 
 127.210333 35.782333 149.031223 
 127.210444 35.782333 151.442167 
 127.210444 35.782444 150.955667 
 127.210444 35.782556 150.525464 
 127.210556 35.782556 152.986152 
 127.210556 35.782667 152.492327 
 127.210556 35.782778 152.054019 
 127.210556 35.782889 151.672838 
 127.210667 35.782889 154.058475 
 127.210667 35.783000 153.611970 
 127.210667 35.783111 153.222722 
 127.210778 35.783111 155.657463 
 127.210778 35.783222 155.202476 
 127.210778 35.783333 154.804877 
 127.210889 35.783333 157.284700 
 127.210889 35.783444 156.821137 
 127.210889 35.783556 156.414443 
 127.211000 35.783556 158.942815 
 127.211000 35.783667 158.471250 
 127.211000 35.783778 158.055809 
 127.211111 35.783778 160.628763 
 127.211111 35.783889 160.148255 
 127.211111 35.784000 159.723970 
 127.211111 35.784111 159.357472 
 127.211222 35.784111 161.855584 
 127.211222 35.784222 161.422167 
 127.211222 35.784333 161.046068 
 127.211333 35.784333 163.587713 
 127.211333 35.784444 163.145874 
 127.211333 35.784556 162.760659 
 127.211444 35.784556 165.349813 
 127.211444 35.784667 164.898466 
 127.211444 35.784778 164.503841 
 127.211556 35.784778 167.138399 
 127.211556 35.784889 166.677348 
 127.211556 35.785000 166.273116 
 127.211667 35.785000 168.950634 
 127.211667 35.785111 168.479019 
 127.211667 35.785222 168.065841 
 127.211667 35.785333 167.709780 
 127.211778 35.785333 170.308556 
 127.211778 35.785444 169.885392 
 127.211778 35.785556 169.519441 
 127.211889 35.785556 172.160315 
 127.211889 35.785667 171.727064 
 127.211889 35.785778 171.351121 
 127.212000 35.785778 174.038000 
 127.212000 35.785889 173.594364 
 127.212000 35.786000 173.208131 
 127.212111 35.786000 175.936564 
 127.212111 35.786111 175.481711 
 127.212111 35.786222 175.085817 
 127.212222 35.786222 177.859844 
 127.212222 35.786333 177.394185 
 127.212222 35.786444 176.987617 
 127.212222 35.786556 176.638841 
 127.212333 35.786556 179.326082 
 127.212333 35.786667 178.908737 
 127.212333 35.786778 178.549277 
 127.212444 35.786778 181.281167 
 127.212444 35.786889 180.852056 
 127.212444 35.787000 180.482296 
 127.212556 35.787000 183.254306 
 127.212556 35.787111 182.813995 
 127.212556 35.787222 182.433166 
 127.212667 35.787222 185.249396 
 127.212667 35.787333 184.797581 
 127.212667 35.787444 184.405377 
 127.212778 35.787444 187.261165 
 127.212778 35.787556 186.797742 
 127.212778 35.787667 186.394062 
 127.212778 35.787778 186.048834 
 127.212889 35.787778 188.818301 
 127.212889 35.787889 188.402174 
 127.212889 35.788000 188.045918 
 127.213000 35.788000 190.854051 
 127.213000 35.788111 190.426020 
 127.213000 35.788222 190.057990 
 127.213111 35.788222 192.908940 
 127.213111 35.788333 192.468697 
 127.213111 35.788444 192.088586 
 127.213222 35.788444 194.977631 
 127.213222 35.788556 194.525075 
 127.213222 35.788667 194.132156 
 127.213333 35.788778 196.599019 
 127.213333 35.788889 196.193588 
 127.213333 35.789000 195.848548 
 127.213444 35.789000 198.685269 
 127.213444 35.789111 198.267224 
 127.213444 35.789222 197.909700 
 127.213556 35.789222 200.787814 
 127.213556 35.789333 200.356847 
 127.213556 35.789445 199.985946 
 127.213667 35.789445 202.900456 
 127.213667 35.789556 202.457279 
 127.213667 35.789667 202.073463 
 127.213778 35.789667 205.028910 
 127.213778 35.789778 204.572424 
 127.213778 35.789889 204.175383 
 127.213778 35.790000 203.839252 
 127.213889 35.790000 206.696981 
 127.213889 35.790111 206.286616 
 127.213889 35.790222 205.937291 
 127.214000 35.790222 208.834975 
 127.214000 35.790333 208.410975 
 127.214000 35.790445 208.047575 
 127.214111 35.790445 210.980181 
 127.214111 35.790556 210.543252 
 127.214111 35.790667 210.166227 
 127.214222 35.790667 213.138328 
 127.214222 35.790778 212.687380 
 127.214222 35.790889 212.296419 
 127.214333 35.790889 215.303098 
 127.214333 35.791000 214.838034 
 127.214333 35.791111 214.433040 
 127.214333 35.791222 214.089068 
 127.214444 35.791222 216.998491 
 127.214444 35.791333 216.579927 
 127.214444 35.791445 216.221720 
 127.214556 35.791445 219.164833 
 127.214556 35.791556 218.731855 
 127.214556 35.791667 218.359316 
 127.214667 35.791667 221.340480 
 127.214667 35.791778 220.892778 
 127.214667 35.791889 220.505598 
 127.214778 35.791889 223.519882 
 127.214778 35.792000 223.056619 
 127.214778 35.792111 222.655446 
 127.214778 35.792222 222.315081 
 127.214889 35.792222 225.228905 
 127.214889 35.792333 224.812713 
 127.214889 35.792444 224.457409 
 127.215000 35.792444 227.403478 
 127.215000 35.792555 226.972174 
 127.215000 35.792667 226.601840 
 127.215111 35.792667 229.584519 
 127.215111 35.792778 229.137795 
 127.215111 35.792889 228.752121 
 127.215222 35.792889 231.766481 
 127.215222 35.793000 231.303504 
 127.215222 35.793111 230.903143 
 127.215333 35.793111 233.953659 
 127.215333 35.793222 233.474837 
 127.215333 35.793333 233.058765 
 127.215333 35.793444 232.704107 
 127.215444 35.793444 235.645648 
 127.215444 35.793555 235.213777 
 127.215444 35.793667 234.843400 
 127.215556 35.793667 237.820125 
 127.215556 35.793778 237.371430 
 127.215556 35.793889 236.985744 
 127.215667 35.793889 239.992738 
 127.215667 35.794000 239.527825 
 127.215667 35.794111 239.126054 
 127.215778 35.794111 242.167785 
 127.215778 35.794222 241.686347 
 127.215778 35.794333 241.268187 
 127.215778 35.794444 240.911962 
 127.215889 35.794444 243.841594 
 127.215889 35.794555 243.406961 
 127.215889 35.794667 243.034343 
 127.216000 35.794667 245.997752 
 127.216000 35.794778 245.545619 
 127.216000 35.794889 245.157024 
 127.216111 35.794889 248.149323 
 127.216111 35.795000 247.680304 
 127.216111 35.795111 247.274959 
 127.216222 35.795111 250.300600 
 127.216222 35.795222 249.814392 
 127.216222 35.795333 249.391994 
 127.216333 35.795333 252.445995 
 127.216333 35.795444 251.942521 
 127.216333 35.795556 251.502290 
 127.216333 35.795667 251.125994 
 127.216444 35.795667 254.068864 
 127.216444 35.795778 253.611173 
 127.216444 35.795889 253.217553 
 127.216556 35.795889 256.187972 
 127.216556 35.796000 255.712746 
 127.216556 35.796111 255.301727 
 127.216667 35.796111 258.304124 
 127.216667 35.796222 257.811063 
 127.216667 35.796333 257.381664 
 127.216778 35.796333 260.410851 
 127.216778 35.796444 259.900817 
 127.216778 35.796556 259.453619 
 127.216778 35.796667 259.070891 
 127.216889 35.796667 261.986163 
 127.216889 35.796778 261.520869 
 127.216889 35.796889 261.120183 
 127.217000 35.796889 264.064144 
 127.217000 35.797000 263.580572 
 127.217000 35.797111 263.161746 
 127.217111 35.797111 266.131719 
 127.217111 35.797222 265.629803 
 127.217111 35.797333 265.192074 
 127.217222 35.797333 268.192244 
 127.217222 35.797444 267.672640 
 127.217222 35.797556 267.216380 
 127.217222 35.797667 266.825128 
 127.217333 35.797667 269.703805 
 127.217333 35.797778 269.228952 
 127.217333 35.797889 268.819247 
 127.217444 35.797889 271.727477 
 127.217444 35.798000 271.233739 
 127.217444 35.798111 270.804606 
 127.217556 35.798111 273.737365 
 127.217556 35.798222 273.225621 
 127.217556 35.798333 272.777652 
 127.217667 35.798333 275.739585 
 127.217667 35.798444 275.208641 
 127.217667 35.798556 274.741548 
 127.217778 35.798667 277.177608 
 127.217778 35.798778 276.691337 
 127.217778 35.798889 276.270089 
 127.217889 35.798889 279.135738 
 127.217889 35.799000 278.630925 
 127.217889 35.799111 278.190320 
 127.218000 35.799111 281.079582 
 127.218000 35.799222 280.555287 
 127.218000 35.799333 280.095274 
 127.218111 35.799333 283.012485 
 127.218111 35.799444 282.468425 
 127.218111 35.799556 281.988720 
 127.218222 35.799556 284.929114 
 127.218222 35.799667 284.365243 
 127.218222 35.799778 283.865801 
 127.218222 35.799889 283.431911 
 127.218333 35.799889 286.248888 
 127.218333 35.800000 285.730377 
 127.218333 35.800111 285.276577 
 127.218444 35.800111 288.116061 
 127.218444 35.800222 287.577525 
 127.218444 35.800333 287.103775 
 127.218556 35.800333 289.970038 
 127.218556 35.800444 289.411200 
 127.218556 35.800556 288.917220 
 127.218667 35.800556 291.805590 
 127.218667 35.800667 291.225472 
 127.218667 35.800778 290.712168 
 127.218667 35.800889 290.264003 
 127.218778 35.800889 293.026233 
 127.218778 35.801000 292.492424 
 127.218778 35.801111 292.023828 
 127.218889 35.801111 294.807529 
 127.218889 35.801222 294.253182 
 127.218889 35.801333 293.764123 
 127.219000 35.801333 296.573493 
 127.219000 35.801444 295.998338 
 127.219000 35.801556 295.488544 
 127.219111 35.801556 298.319017 
 127.219111 35.801667 297.722057 
 127.219111 35.801778 297.192469 
 127.219111 35.801889 296.728526 
 127.219222 35.801889 299.430225 
 127.219222 35.802000 298.879644 
 127.219222 35.802111 298.394780 
 127.219333 35.802111 301.116986 
 127.219333 35.802222 300.545387 
 127.219333 35.802333 300.039580 
 127.219444 35.802333 302.786411 
 127.219444 35.802445 302.192569 
 127.219444 35.802556 301.666517 
 127.219556 35.802556 304.433521 
 127.219556 35.802667 303.818343 
 127.219556 35.802778 303.271102 
 127.219556 35.802889 302.790008 
 127.219667 35.802889 305.425702 
 127.219667 35.803000 304.857012 
 127.219667 35.803111 304.354543 
 127.219778 35.803111 307.009856 
 127.219778 35.803222 306.418746 
 127.219778 35.803333 305.895845 
 127.219889 35.803333 308.574810 
 127.219889 35.803445 307.961944 
 127.219889 35.803556 307.417435 
 127.220000 35.803556 310.115721 
 127.220000 35.803667 309.481090 
 127.220000 35.803778 308.914965 
 127.220000 35.803889 308.415491 
 127.220111 35.803889 310.980031 
 127.220111 35.804000 310.392038 
 127.220111 35.804111 309.870769 
 127.220222 35.804111 312.454122 
 127.220222 35.804222 311.843265 
 127.220222 35.804333 311.301189 
 127.220333 35.804333 313.907292 
 127.220333 35.804444 313.274277 
 127.220333 35.804556 312.710192 
 127.220444 35.804556 315.334847 
 127.220444 35.804667 314.679675 
 127.220444 35.804778 314.093583 
 127.220444 35.804889 313.574647 
 127.220556 35.804889 316.063226 
 127.220556 35.805000 315.453895 
 127.220556 35.805111 314.913770 
 127.220667 35.805111 317.420439 
 127.220667 35.805222 316.788825 
 127.220667 35.805333 316.226567 
 127.220778 35.805333 318.755161 
 127.220778 35.805444 318.101024 
 127.220778 35.805555 317.516394 
 127.220889 35.805555 320.062856 
 127.220889 35.805667 319.386207 
 127.220889 35.805778 318.779218 
 127.220889 35.805889 318.239891 
 127.221000 35.805889 320.648055 
 127.221000 35.806000 320.017446 
 127.221000 35.806111 319.456622 
 127.221111 35.806111 321.882239 
 127.221111 35.806222 321.229012 
 127.221111 35.806333 320.645723 
 127.221222 35.806333 323.092520 
 127.221222 35.806444 322.416443 
 127.221222 35.806555 321.810457 
 127.221333 35.806555 324.274523 
 127.221333 35.806667 323.575621 
 127.221333 35.806778 322.945938 
 127.221333 35.806889 322.386471 
 127.221444 35.806889 324.710134 
 127.221444 35.807000 324.057511 
 127.221444 35.807111 323.475256 
 127.221556 35.807111 325.815823 
 127.221556 35.807222 325.140287 
 127.221556 35.807333 324.535273 
 127.221667 35.807333 326.896356 
 127.221667 35.807444 326.197684 
 127.221667 35.807556 325.568668 
 127.221778 35.807556 327.946231 
 127.221778 35.807667 327.225757 
 127.221778 35.807778 326.573753 
 127.221778 35.807889 325.992552 
 127.221889 35.807889 328.228000 
 127.221889 35.808000 327.552789 
 127.221889 35.808111 326.948536 
 127.222000 35.808111 329.200428 
 127.222000 35.808222 328.502050 
 127.222000 35.808333 327.874783 
 127.222111 35.808333 330.146611 
 127.222111 35.808444 329.424851 
 127.222111 35.808556 328.773299 
 127.222222 35.808556 331.061187 
 127.222222 35.808667 330.317429 
 127.222222 35.808778 329.642655 
 127.222222 35.808889 329.039274 
 127.222333 35.808889 331.183177 
 127.222333 35.809000 330.484970 
 127.222333 35.809111 329.858313 
 127.222444 35.809111 332.020120 
 127.222444 35.809222 331.298402 
 127.222444 35.809333 330.647332 
 127.222556 35.809333 332.824897 
 127.222556 35.809444 332.081062 
 127.222556 35.809556 331.406650 
 127.222667 35.809556 333.603656 
 127.222667 35.809667 332.836200 
 127.222667 35.809778 332.138243 
 127.222667 35.809889 331.512273 
 127.222778 35.809889 333.560218 
 127.222778 35.810000 332.838774 
 127.222778 35.810111 332.188418 
 127.222889 35.810111 334.255100 
 127.222889 35.810222 333.511311 
 127.222889 35.810333 332.837387 
 127.223000 35.810333 334.919852 
 127.223000 35.810444 334.152482 
 127.223000 35.810556 333.455053 
 127.223111 35.810556 335.556574 
 127.223111 35.810667 334.765428 
 127.223111 35.810778 334.044301 
 127.223111 35.810889 333.395760 
 127.223222 35.810889 335.346741 
 127.223222 35.811000 334.601984 
 127.223222 35.811111 333.928877 
 127.223333 35.811111 335.898255 
 127.223333 35.811222 335.131061 
 127.223333 35.811333 334.434252 
 127.223444 35.811333 336.419248 
 127.223444 35.811444 335.628350 
 127.223444 35.811556 334.907916 
 127.223556 35.811556 336.911668 
 127.223556 35.811667 336.096882 
 127.223556 35.811778 335.352637 
 127.223667 35.811889 336.532060 
 127.223667 35.812000 335.765465 
 127.223667 35.812111 335.069703 
 127.223778 35.812111 336.939708 
 127.223778 35.812222 336.149243 
 127.223778 35.812333 335.429688 
 127.223889 35.812333 337.315236 
 127.223889 35.812444 336.500986 
 127.223889 35.812556 335.757725 
 127.224000 35.812556 337.661820 
 127.224000 35.812667 336.823609 
 127.224000 35.812778 336.056466 
 127.224111 35.812889 337.112672 
 127.224111 35.813000 336.323159 
 127.224111 35.813111 335.605005 
 127.224222 35.813111 337.373962 
 127.224222 35.813222 336.560527 
 127.224222 35.813333 335.818531 
 127.224333 35.813333 337.603046 
 127.224333 35.813444 336.765786 
 127.224333 35.813556 336.000044 
 127.224444 35.813556 337.802983 
 127.224444 35.813667 336.940311 
 127.224444 35.813778 336.152075 
 127.224556 35.813778 337.970683 
 127.224556 35.813889 337.084080 
 127.224556 35.814000 336.272074 
 127.224556 35.814111 335.531960 
 127.224667 35.814111 337.198582 
 127.224667 35.814222 336.362644 
 127.224667 35.814333 335.598676 
 127.224778 35.814333 337.280963 
 127.224778 35.814445 336.419782 
 127.224778 35.814556 335.633486 
 127.224889 35.814556 337.334161 
 127.224889 35.814667 336.448955 
 127.224889 35.814778 335.638796 
 127.225000 35.814778 337.355286 
 127.225000 35.814889 336.446168 
 127.225000 35.815000 335.612259 
 127.225000 35.815111 334.850777 
 127.225111 35.815111 336.414166 
 127.225111 35.815222 335.556353 
 127.225111 35.815333 334.771048 
 127.225222 35.815333 336.350294 
 127.225222 35.815445 335.467241 
 127.225222 35.815556 334.659684 
 127.225333 35.815556 336.257371 
 127.225333 35.815667 335.350341 
 127.225333 35.815778 334.518970 
 127.225444 35.815778 336.132703 
 127.225444 35.815889 335.201819 
 127.225444 35.816000 334.346757 
 127.225444 35.816111 333.564661 
 127.225556 35.816111 335.024300 
 127.225556 35.816222 334.143952 
 127.225556 35.816333 333.339550 
 127.225667 35.816333 334.815325 
 127.225667 35.816445 333.911229 
 127.225667 35.816556 333.083241 
 127.225778 35.816556 334.577592 
 127.225778 35.816667 333.649606 
 127.225778 35.816778 332.797891 
 127.225889 35.816778 334.308606 
 127.225889 35.816889 333.356862 
 127.225889 35.817000 332.481554 
 127.225889 35.817111 331.679754 
 127.226000 35.817111 333.035498 
 127.226000 35.817222 332.134976 
 127.226000 35.817333 331.311012 
 127.226111 35.817333 332.683254 
 127.226111 35.817444 331.759099 
 127.226111 35.817555 330.911665 
 127.226222 35.817555 332.302704 
 127.226222 35.817667 331.354783 
 127.226222 35.817778 330.483747 
 127.226333 35.817778 331.891549 
 127.226333 35.817889 330.920005 
 127.226333 35.818000 330.024035 
 127.226444 35.818000 331.450660 
 127.226444 35.818111 330.457139 
 127.226444 35.818222 329.537541 
 127.226444 35.818333 328.695113 
 127.226556 35.818333 329.964125 
 127.226556 35.818444 329.021046 
 127.226556 35.818555 328.155301 
 127.226667 35.818555 329.443409 
 127.226667 35.818667 328.476725 
 127.226667 35.818778 327.586075 
 127.226778 35.818778 328.891124 
 127.226778 35.818889 327.902753 
 127.226778 35.819000 326.988774 
 127.226889 35.819000 328.313283 
 127.226889 35.819111 327.301379 
 127.226889 35.819222 326.363950 
 127.226889 35.819333 325.504303 
 127.227000 35.819333 326.670736 
 127.227000 35.819444 325.710015 
 127.227000 35.819555 324.827239 
 127.227111 35.819555 326.013147 
 127.227111 35.819667 325.029016 
 127.227111 35.819778 324.121502 
 127.227222 35.819778 325.324906 
 127.227222 35.819889 324.319323 
 127.227222 35.820000 323.388686 
 127.227333 35.820000 324.611964 
 127.227333 35.820111 323.583060 
 127.227333 35.820222 322.629186 
 127.227444 35.820222 323.870611 
 127.227444 35.820333 322.818551 
 127.227444 35.820444 321.841606 
 127.227444 35.820556 320.941739 
 127.227556 35.820556 322.026210 
 127.227556 35.820667 321.027870 
 127.227556 35.820778 320.104947 
 127.227667 35.820778 321.207847 
 127.227667 35.820889 320.186536 
 127.227667 35.821000 319.240729 
 127.227778 35.821000 320.363991 
 127.227778 35.821111 319.319604 
 127.227778 35.821222 318.350805 
 127.227889 35.821222 319.493918 
 127.227889 35.821333 318.424719 
 127.227889 35.821444 317.434735 
 127.227889 35.821556 316.520644 
 127.228000 35.821556 317.504746 
 127.228000 35.821667 316.492022 
 127.228000 35.821778 315.555277 
 127.228111 35.821778 316.560067 
 127.228111 35.821889 315.524503 
 127.228111 35.822000 314.565002 
 127.228222 35.822000 315.589124 
 127.228222 35.822111 314.530898 
 127.228222 35.822222 313.548824 
 127.228333 35.822222 314.594105 
 127.228333 35.822333 313.511328 
 127.228333 35.822444 312.508375 
 127.228444 35.822444 313.573402 
 127.228444 35.822556 312.468012 
 127.228444 35.822667 311.442611 
 127.228444 35.822778 310.493753 
 127.228556 35.822778 311.401187 
 127.228556 35.822889 310.353243 
 127.228556 35.823000 309.381928 
 127.228667 35.823000 310.309472 
 127.228667 35.823111 309.237399 
 127.228667 35.823222 308.245592 
 127.228778 35.823222 309.194937 
 127.228778 35.823333 308.100380 
 127.228778 35.823444 307.086253 
 127.228889 35.823444 308.056150 
 127.228889 35.823556 306.939301 
 127.228889 35.823667 305.903045 
 127.228889 35.823778 304.943900 
 127.229000 35.823778 305.756029 
 127.229000 35.823889 304.697557 
 127.229000 35.824000 303.716282 
 127.229111 35.824000 304.549361 
 127.229111 35.824111 303.467076 
 127.229111 35.824222 302.465660 
 127.229222 35.824222 303.321245 
 127.229222 35.824333 302.216816 
 127.229222 35.824444 301.193419 
 127.229333 35.824444 302.070421 
 127.229333 35.824556 300.944047 
 127.229333 35.824667 299.898868 
 127.229444 35.824667 300.798918 
 127.229444 35.824778 299.650516 
 127.229444 35.824889 298.581705 
 127.229444 35.825000 297.594198 
 127.229556 35.825000 298.335191 
 127.229556 35.825111 297.244680 
 127.229556 35.825222 296.235636 
 127.229667 35.825222 296.999899 
 127.229667 35.825333 295.887609 
 127.229667 35.825444 294.856948 
 127.229778 35.825444 295.643547 
 127.229778 35.825556 294.509683 
 127.229778 35.825667 293.455870 
 127.229889 35.825667 294.265993 
 127.229889 35.825778 293.112533 
 127.229889 35.825889 292.037194 
 127.230000 35.826000 291.695287 
 127.230000 35.826111 290.598632 
 127.230000 35.826222 289.584038 
 127.230111 35.826222 290.259659 
 127.230111 35.826333 289.141613 
 127.230111 35.826444 288.105789 
 127.230222 35.826444 288.804714 
 127.230222 35.826556 287.665488 
 127.230222 35.826667 286.606897 
 127.230333 35.826667 287.330186 
 127.230333 35.826778 286.171771 
 127.230333 35.826889 285.092054 
 127.230444 35.826889 285.839165 
 127.230444 35.827000 284.659750 
 127.230444 35.827111 283.559120 
 127.230444 35.827222 282.541139 
 127.230556 35.827222 283.131021 
 127.230556 35.827333 282.009409 
 127.230556 35.827445 280.968888 
 127.230667 35.827445 281.582772 
 127.230667 35.827556 280.442427 
 127.230667 35.827667 279.381266 
 127.230778 35.827667 280.020717 
 127.230778 35.827778 278.859574 
 127.230778 35.827889 277.777705 
 127.230889 35.827889 278.442008 
 127.230889 35.828000 277.260287 
 127.230889 35.828111 276.157930 
 127.231000 35.828111 276.848418 
 127.231000 35.828222 275.644054 
 127.231000 35.828333 274.523140 
 127.231000 35.828445 273.481899 
 127.231111 35.828445 274.014202 
 127.231111 35.828556 272.872990 
 127.231111 35.828667 271.811541 
 127.231222 35.828667 272.370343 
 127.231222 35.828778 271.208769 
 127.231222 35.828889 270.127046 
 127.231333 35.828889 270.711768 
 127.231333 35.829000 269.530056 
 127.231333 35.829111 268.428285 
 127.231444 35.829111 269.040141 
 127.231444 35.829222 267.836231 
 127.231444 35.829333 266.716346 
 127.231556 35.829333 267.354679 
 127.231556 35.829444 266.130759 
 127.231556 35.829556 264.991024 
 127.231556 35.829667 263.931630 
 127.231667 35.829667 264.413146 
 127.231667 35.829778 263.253499 
 127.231667 35.829889 262.174282 
 127.231778 35.829889 262.682817 
 127.231778 35.830000 261.501528 
 127.231778 35.830111 260.404676 
 127.231889 35.830111 260.941332 
 127.231889 35.830222 259.740265 
 127.231889 35.830333 258.623793 
 127.232000 35.830333 259.188036 
 127.232000 35.830444 257.967422 
 127.232000 35.830555 256.831561 
 127.232111 35.830667 256.184363 
 127.232111 35.830778 255.029053 
 127.232111 35.830889 253.954752 
 127.232222 35.830889 254.390641 
 127.232222 35.831000 253.214163 
 127.232222 35.831111 252.122685 
 127.232333 35.831111 252.587713 
 127.232333 35.831222 251.391928 
 127.232333 35.831333 250.281299 
 127.232444 35.831333 250.775047 
 127.232444 35.831444 249.560189 
 127.232444 35.831555 248.430641 
 127.232556 35.831555 248.954198 
 127.232556 35.831667 247.720210 
 127.232556 35.831778 246.569782 
 127.232556 35.831889 245.504753 
 127.232667 35.831889 245.871662 
 127.232667 35.832000 244.702462 
 127.232667 35.832111 243.618814 
 127.232778 35.832111 244.015905 
 127.232778 35.832222 242.827877 
 127.232778 35.832333 241.725556 
 127.232889 35.832333 242.152521 
 127.232889 35.832444 240.945902 
 127.232889 35.832556 239.823286 
 127.233000 35.832556 240.280792 
 127.233000 35.832667 239.057704 
 127.233000 35.832778 237.916563 
 127.233111 35.832778 238.404529 
 127.233111 35.832889 237.163064 
 127.233111 35.833000 236.003636 
 127.233111 35.833111 234.930304 
 127.233222 35.833111 235.263248 
 127.233222 35.833222 234.085478 
 127.233222 35.833333 232.993957 
 127.233333 35.833333 233.358388 
 127.233333 35.833444 232.162369 
 127.233333 35.833556 231.050913 
 127.233444 35.833556 231.446359 
 127.233444 35.833667 230.234489 
 127.233444 35.833778 229.105143 
 127.233556 35.833778 229.532865 
 127.233556 35.833889 228.302962 
 127.233556 35.834000 227.155672 
 127.233667 35.834000 227.615319 
 127.233667 35.834111 226.367622 
 127.233667 35.834222 225.202629 
 127.233667 35.834333 224.122635 
 127.233778 35.834333 224.427593 
 127.233778 35.834444 223.246947 
 127.233778 35.834556 222.149315 
 127.233889 35.834556 222.486786 
 127.233889 35.834667 221.288655 
 127.233889 35.834778 220.173625 
 127.234000 35.834778 220.544459 
 127.234000 35.834889 219.328788 
 127.234000 35.835000 218.196307 
 127.234111 35.835000 218.600242 
 127.234111 35.835111 217.367272 
 127.234111 35.835222 216.217581 
 127.234222 35.835222 216.655571 
 127.234222 35.835333 215.403171 
 127.234222 35.835444 214.238295 
 127.234222 35.835556 213.157007 
 127.234333 35.835556 213.440432 
 127.234333 35.835667 212.258563 
 127.234333 35.835778 211.160371 
 127.234444 35.835778 211.478253 
 127.234444 35.835889 210.279338 
 127.234444 35.836000 209.164188 
 127.234556 35.836000 209.516348 
 127.234556 35.836111 208.298610 
 127.234556 35.836222 207.168762 
 127.234667 35.836222 207.556072 
 127.234667 35.836333 206.321447 
 127.234667 35.836444 205.174858 
 127.234778 35.836444 205.597028 
 127.234778 35.836556 204.345758 
 127.234778 35.836667 203.182669 
 127.234778 35.836778 202.103829 
 127.234889 35.836778 202.372711 
 127.234889 35.836889 201.191111 
 127.234889 35.837000 200.097760 
 127.235000 35.837000 200.402092 
 127.235000 35.837111 199.204152 
 127.235000 35.837222 198.094604 
 127.235111 35.837222 198.435181 
 127.235111 35.837333 197.220845 
 127.235111 35.837444 196.095045 
 127.235222 35.837444 196.471649 
 127.235222 35.837556 195.241159 
 127.235222 35.837667 194.099348 
 127.235333 35.837667 194.512885 
 127.235333 35.837778 193.266187 
 127.235333 35.837889 192.106392 
 127.235333 35.838000 191.035338 
 127.235444 35.838000 191.295780 
 127.235444 35.838111 190.120133 
 127.235444 35.838222 189.033368 
 127.235556 35.838222 189.331145 
 127.235556 35.838333 188.139588 
 127.235556 35.838444 187.037056 
 127.235667 35.838444 187.372013 
 127.235667 35.838556 186.164789 
 127.235667 35.838667 185.044880 
 127.235778 35.838667 185.417528 
 127.235778 35.838778 184.196756 
 127.235778 35.838889 183.061235 
 127.235778 35.839000 182.014938 
 127.235889 35.839000 182.235398 
 127.235889 35.839111 181.084507 
 127.235889 35.839222 180.022977 
 127.236000 35.839222 180.281852 
 127.236000 35.839333 179.115532 
 127.236000 35.839445 178.036933 
 127.236111 35.839445 178.333798 
 127.236111 35.839556 177.154393 
 127.236111 35.839667 176.060717 
 127.236222 35.839667 176.396672 
 127.236222 35.839778 175.202046 
 127.236222 35.839889 174.093233 
 127.236333 35.839889 174.468057 
 127.236333 35.840000 173.258447 
 127.236333 35.840111 172.134736 
 127.236333 35.840222 171.100852 
 127.236444 35.840222 171.324668 
 127.236444 35.840333 170.185998 
 127.236444 35.840445 169.135562 
 127.236556 35.840445 169.398482 
 127.236556 35.840556 168.247148 
 127.236556 35.840667 167.182101 
 127.236667 35.840667 167.485168 
 127.236667 35.840778 166.319077 
 127.236667 35.840889 165.239356 
 127.236778 35.840889 165.582394 
 127.236778 35.841000 164.401783 
 127.236778 35.841111 163.307626 
 127.236889 35.841111 163.691471 
 127.236889 35.841222 162.494295 
 127.236889 35.841333 161.387618 
 127.236889 35.841445 160.367700 
 127.237000 35.841445 160.600417 
 127.237000 35.841556 159.479501 
 127.237000 35.841667 158.445426 
 127.237111 35.841667 158.719325 
 127.237111 35.841778 157.584104 
 127.237111 35.841889 156.535806 
 127.237222 35.841889 156.850751 
 127.237222 35.842000 155.701460 
 127.237222 35.842111 154.639174 
 127.237333 35.842111 154.995948 
 127.237333 35.842222 153.830594 
 127.237333 35.842333 152.756180 
 127.237444 35.842333 153.154513 
 127.237444 35.842444 151.975232 
 127.237444 35.842555 150.887020 
 127.237444 35.842667 149.886196 
 127.237556 35.842667 150.134547 
 127.237556 35.842778 149.032468 
 127.237556 35.842889 148.017859 
 127.237667 35.842889 148.308297 
 127.237667 35.843000 147.190739 
 127.237667 35.843111 146.164420 
 127.237778 35.843111 146.497683 
 127.237778 35.843222 145.366396 
 127.237778 35.843333 144.326475 
 127.237889 35.843333 144.702321 
 127.237889 35.843444 143.557536 
 127.237889 35.843555 142.504244 
 127.238000 35.843555 142.923541 
 127.238000 35.843667 141.765185 
 127.238000 35.843778 140.696689 
 127.238000 35.843889 139.719722 
 127.238111 35.843889 139.989116 
 127.238111 35.844000 138.907381 
 127.238111 35.844111 137.917300 
 127.238222 35.844111 138.230483 
 127.238222 35.844222 137.135434 
 127.238222 35.844333 136.132164 
 127.238333 35.844333 136.488916 
 127.238333 35.844444 135.380781 
 127.238333 35.844555 134.364547 
 127.238444 35.844555 134.765697 
 127.238444 35.844667 133.644397 
 127.238444 35.844778 132.613430 
 127.238556 35.844778 133.058282 
 127.238556 35.844889 131.926070 
 127.238556 35.845000 130.882265 
 127.238556 35.845111 129.930516 
 127.238667 35.845111 130.226906 
 127.238667 35.845222 129.170183 
 127.238667 35.845333 128.205638 
 127.238778 35.845333 128.546979 
 127.238778 35.845444 127.477410 
 127.238778 35.845556 126.498536 
 127.238889 35.845556 126.884280 
 127.238889 35.845667 125.804024 
 127.238889 35.845778 124.812624 
 127.239000 35.845778 125.243967 
 127.239000 35.845889 124.151025 
 127.239000 35.846000 123.147017 
 127.239111 35.846000 123.623533 
 127.239111 35.846111 122.518127 
 127.239111 35.846222 121.501729 
 127.239111 35.846333 120.576383 
 127.239222 35.846333 120.904615 
 127.239222 35.846444 119.877588 
 127.239222 35.846556 118.939864 
 127.239333 35.846556 119.313721 
 127.239333 35.846667 118.274458 
 127.239333 35.846778 117.324574 
 127.239444 35.846778 117.744886 
 127.239444 35.846889 116.693299 
 127.239444 35.847000 115.731165 
 127.239556 35.847000 116.197516 
 127.239556 35.847111 115.133820 
 127.239556 35.847222 114.159652 
 127.239667 35.847222 114.673012 
 127.239667 35.847333 113.595344 
 127.239667 35.847444 112.610822 
 127.239667 35.847556 111.716120 
 127.239778 35.847556 112.080947 
 127.239778 35.847667 111.084534 
 127.239778 35.847778 110.178013 
 127.239889 35.847778 110.590110 
 127.239889 35.847889 109.581711 
 127.239889 35.848000 108.663277 
 127.240000 35.848000 109.122226 
 127.240000 35.848111 108.100375 
 127.240000 35.848222 107.171915 
 127.240111 35.848222 107.678664 
 127.240111 35.848333 106.644921 
 127.240111 35.848444 105.704682 
 127.240222 35.848444 106.258659 
 127.240222 35.848556 105.213232 
 127.240222 35.848667 104.261421 
 127.240333 35.848778 103.806506 
 127.240333 35.848889 102.843023 
 127.240333 35.849000 101.970010 
 127.240444 35.849000 102.424123 
 127.240444 35.849111 101.447575 
 127.240444 35.849222 100.564765 
 127.240556 35.849222 101.067418 
 127.240556 35.849333 100.079283 
 127.240556 35.849444 99.184994 
 127.240667 35.849444 99.735610 
 127.240667 35.849556 98.736089 
 127.240667 35.849667 97.830524 
 127.240778 35.849667 98.430174 
 127.240778 35.849778 97.419163 
 127.240778 35.849889 96.500716 
 127.240889 35.850000 96.127862 
 127.240889 35.850111 95.198214 
 127.240889 35.850222 94.362636 
 127.241000 35.850222 94.863496 
 127.241000 35.850333 93.922538 
 127.241000 35.850444 93.075756 
 127.241111 35.850444 93.625258 
 127.241111 35.850556 92.673187 
 127.241111 35.850667 91.814001 
 127.241222 35.850667 92.412863 
 127.241222 35.850778 91.451303 
 127.241222 35.850889 90.580978 
 127.241333 35.850889 91.228788 
 127.241333 35.851000 90.256218 
 127.241333 35.851111 89.374950 
 127.241444 35.851111 90.072911 
 127.241444 35.851222 89.089216 
 127.241444 35.851333 88.196889 
 127.241444 35.851444 87.399053 
 127.241556 35.851444 87.949463 
 127.241556 35.851556 87.046269 
 127.241556 35.851667 86.236357 
 127.241667 35.851667 86.836734 
 127.241667 35.851778 85.924205 
 127.241667 35.851889 85.103391 
 127.241778 35.851889 85.753308 
 127.241778 35.852000 84.830002 
 127.241778 35.852111 83.998475 
 127.241889 35.852111 84.699125 
 127.241889 35.852222 83.764920 
 127.241889 35.852333 82.922557 
 127.242000 35.852333 83.673011 
 127.242000 35.852445 82.726547 
 127.242000 35.852556 81.875081 
 127.242000 35.852667 81.115738 
 127.242111 35.852667 81.719361 
 127.242111 35.852778 80.857139 
 127.242111 35.852889 80.087102 
 127.242222 35.852889 80.740798 
 127.242222 35.853000 79.868003 
 127.242222 35.853111 79.087456 
 127.242333 35.853111 79.792407 
 127.242333 35.853222 78.908912 
 127.242333 35.853333 78.117724 
 127.242444 35.853333 78.872982 
 127.242444 35.853445 77.977507 
 127.242444 35.853556 77.177318 
 127.242556 35.853556 77.984216 
 127.242556 35.853667 77.078071 
 127.242556 35.853778 76.267308 
 127.242556 35.853889 75.549190 
 127.242667 35.853889 76.208091 
 127.242667 35.854000 75.386931 
 127.242667 35.854111 74.658476 
 127.242778 35.854111 75.369098 
 127.242778 35.854222 74.536055 
 127.242778 35.854333 73.798478 
 127.242889 35.854333 74.559845 
 127.242889 35.854445 73.716427 
 127.242889 35.854556 72.968568 
 127.243000 35.854556 73.782011 
 127.243000 35.854667 72.928079 
 127.243000 35.854778 72.169799 
 127.243111 35.854778 73.034175 
 127.243111 35.854889 72.169899 
 127.243111 35.855000 71.400129 
 127.243111 35.855111 70.725994 
 127.243222 35.855111 71.443403 
 127.243222 35.855222 70.663222 
 127.243222 35.855333 69.978769 
 127.243333 35.855333 70.747302 
 127.243333 35.855444 69.956879 
 127.243333 35.855555 69.262276 
 127.243444 35.855555 70.083259 
 127.243444 35.855667 69.282448 
 127.243444 35.855778 68.577549 
 127.243556 35.855778 69.449811 
 127.243556 35.855889 68.638778 
 127.243556 35.856000 67.922598 
 127.243667 35.856000 68.847277 
 127.243667 35.856111 68.027365 
 127.243667 35.856222 67.300885 
 127.243778 35.856333 67.446882 
 127.243778 35.856444 66.710265 
 127.243778 35.856555 66.069715 
 127.243889 35.856555 66.898975 
 127.243889 35.856667 66.152067 
 127.243889 35.856778 65.500276 
 127.244000 35.856778 66.380756 
 127.244000 35.856889 65.625098 
 127.244000 35.857000 64.963247 
 127.244111 35.857000 65.896769 
 127.244111 35.857111 65.130841 
 127.244111 35.857222 64.458771 
 127.244222 35.857222 65.444918 
 127.244222 35.857333 64.668718 
 127.244222 35.857444 63.986428 
 127.244333 35.857444 65.024297 
 127.244333 35.857556 64.236709 
 127.244333 35.857667 63.545624 
 127.244333 35.857778 62.948713 
 127.244444 35.857778 63.839046 
 127.244444 35.857889 63.137751 
 127.244444 35.858000 62.530679 
 127.244556 35.858000 63.472839 
 127.244556 35.858111 62.761484 
 127.244556 35.858222 62.144403 
 127.244667 35.858222 63.139945 
 127.244667 35.858333 62.418365 
 127.244667 35.858444 61.791108 
 127.244778 35.858444 62.838548 
 127.244778 35.858556 62.105714 
 127.244778 35.858667 61.469606 
 127.244889 35.858667 62.570659 
 127.244889 35.858778 61.827561 
 127.244889 35.858889 61.181274 
 127.244889 35.859000 60.629619 
 127.245000 35.859000 61.581066 
 127.245000 35.859111 60.924743 
 127.245000 35.859222 60.363100 
 127.245111 35.859222 61.368072 
 127.245111 35.859333 60.700476 
 127.245111 35.859444 60.129737 
 127.245222 35.859444 61.186719 
 127.245222 35.859556 60.509040 
 127.245222 35.859667 59.928299 
 127.245333 35.859667 61.039005 
 127.245333 35.859778 60.351067 
 127.245333 35.859889 59.760146 
 127.245444 35.859889 60.922888 
 127.245444 35.860000 60.224830 
 127.245444 35.860111 59.623870 
 127.245444 35.860222 59.117985 
 127.245556 35.860222 60.132163 
 127.245556 35.860333 59.520013 
 127.245556 35.860444 59.004922 
 127.245667 35.860444 60.071160 
 127.245667 35.860556 59.448909 
 127.245667 35.860667 58.923795 
 127.245778 35.860667 60.043807 
 127.245778 35.860778 59.411270 
 127.245778 35.860889 58.875949 
 127.245889 35.860889 60.048018 
 127.245889 35.861000 59.405330 
 127.245889 35.861111 58.859078 
 127.246000 35.861111 60.084727 
 127.246000 35.861222 59.432905 
 127.246000 35.861333 58.876375 
 127.246000 35.861444 58.417095 
 127.246111 35.861444 59.492050 
 127.246111 35.861556 58.925371 
 127.246111 35.861667 58.456018 
 127.246222 35.861667 59.584735 
 127.246222 35.861778 59.007716 
 127.246222 35.861889 58.527357 
 127.246333 35.861889 59.707742 
 127.246333 35.862000 59.121602 
 127.246333 35.862111 58.631089 
 127.246444 35.862111 59.865361 
 127.246444 35.862222 59.268834 
 127.246444 35.862333 58.767971 
 127.246556 35.862333 60.054212 
 127.246556 35.862444 59.447421 
 127.246556 35.862556 58.936334 
 127.246667 35.862667 59.659323 
 127.246667 35.862778 59.137814 
 127.246667 35.862889 58.713236 
 127.246778 35.862889 59.901375 
 127.246778 35.863000 59.370561 
 127.246778 35.863111 58.935738 
 127.246889 35.863111 60.177663 
 127.246889 35.863222 59.636366 
 127.246889 35.863333 59.191096 
 127.247000 35.863333 60.484863 
 127.247000 35.863444 59.933201 
 127.247000 35.863556 59.477603 
 127.247111 35.863556 60.825240 
 127.247111 35.863667 60.262125 
 127.247111 35.863778 59.796878 
 127.247222 35.863778 61.196268 
 127.247222 35.863889 60.622682 
 127.247222 35.864000 60.147036 
 127.247222 35.864111 59.767735 
 127.247333 35.864111 61.016102 
 127.247333 35.864222 60.529850 
 127.247333 35.864333 60.139977 
 127.247444 35.864333 61.440002 
 127.247444 35.864445 60.942485 
 127.247444 35.864556 60.542924 
 127.247556 35.864556 61.896631 
 127.247556 35.864667 61.388392 
 127.247556 35.864778 60.978180 
 127.247667 35.864778 62.383429 
 127.247667 35.864889 61.864578 
 127.247667 35.865000 61.443824 
 127.247778 35.865000 62.902797 
 127.247778 35.865111 62.373122 
 127.247778 35.865222 61.941612 
 127.247778 35.865333 61.606825 
 127.247889 35.865333 62.911606 
 127.247889 35.865445 62.468771 
 127.247889 35.865556 62.124044 
 127.248000 35.865556 63.482263 
 127.248000 35.865667 63.028545 
 127.248000 35.865778 62.673003 
 127.248111 35.865778 64.082499 
 127.248111 35.865889 63.618002 
 127.248111 35.866000 63.251750 
 127.248222 35.866000 64.714700 
 127.248222 35.866111 64.239205 
 127.248222 35.866222 63.861458 
 127.248333 35.866222 65.375176 
 127.248333 35.866333 64.889706 
 127.248333 35.866445 64.501111 
 127.248333 35.866556 64.210768 
 127.248444 35.866556 65.571717 
 127.248444 35.866667 65.172053 
 127.248444 35.866778 64.870706 
 127.248556 35.866778 66.282617 
 127.248556 35.866889 65.871982 
 127.248556 35.867000 65.559732 
 127.248667 35.867000 67.024771 
 127.248667 35.867111 66.602941 
 127.248667 35.867222 66.279089 
 127.248778 35.867222 67.794555 
 127.248778 35.867333 67.362455 
 127.248778 35.867444 67.027550 
 127.248889 35.867444 68.596123 
 127.248889 35.867555 68.152716 
 127.248889 35.867667 67.806531 
 127.249000 35.867667 69.425696 
 127.249000 35.867778 68.971078 
 127.249000 35.867889 68.613708 
 127.249000 35.868000 68.354493 
 127.249111 35.868000 69.819167 
 127.249111 35.868111 69.451098 
 127.249111 35.868222 69.180511 
 127.249222 35.868222 70.695579 
 127.249222 35.868333 70.316205 
 127.249222 35.868444 70.034338 
 127.249333 35.868444 71.602113 
 127.249333 35.868555 71.211201 
 127.249333 35.868667 70.917820 
 127.249444 35.868667 72.535776 
 127.249444 35.868778 72.132808 
 127.249444 35.868889 71.828611 
 127.249556 35.868889 73.499216 
 127.249556 35.869000 73.084545 
 127.249556 35.869111 72.768707 
 127.249556 35.869222 72.550656 
 127.249667 35.869222 74.064353 
 127.249667 35.869333 73.736800 
 127.249667 35.869444 73.507055 
 127.249778 35.869444 75.070597 
 127.249778 35.869555 74.731416 
 127.249778 35.869667 74.490065 
 127.249889 35.869667 76.105826 
 127.249889 35.869778 75.754256 
 127.249889 35.869889 75.501578 
 127.250000 35.869889 77.166945 
 127.250000 35.870000 76.803572 
 127.250000 35.870111 76.539151 
 127.250111 35.870111 78.256654 
 127.250111 35.870222 77.881234 
 127.250111 35.870333 77.604828 
 127.250111 35.870444 77.426524 
 127.250222 35.870444 78.984305 
 127.250222 35.870556 78.695587 
 127.250222 35.870667 78.505812 
 127.250333 35.870667 80.115308 
 127.250333 35.870778 79.814421 
 127.250333 35.870889 79.612539 
 127.250444 35.870889 81.271136 
 127.250444 35.871000 80.958163 
 127.250444 35.871111 80.744256 
 127.250556 35.871111 82.454462 
 127.250556 35.871222 82.129155 
 127.250556 35.871333 81.902974 
 127.250667 35.871333 83.662013 
 127.250667 35.871444 83.324452 
 127.250667 35.871556 83.085751 
 127.250778 35.871667 84.546546 
 127.250778 35.871778 84.295379 
 127.250778 35.871889 84.143326 
 127.250889 35.871889 85.792326 
 127.250889 35.872000 85.528772 
 127.250889 35.872111 85.364390 
 127.251000 35.872111 87.064434 
 127.251000 35.872222 86.788240 
 127.251000 35.872333 86.611058 
 127.251111 35.872333 88.359014 
 127.251111 35.872444 88.070837 
 127.251111 35.872556 87.881130 
 127.251222 35.872556 89.679994 
 127.251222 35.872667 89.379022 
 127.251222 35.872778 89.176534 
 127.251333 35.872778 91.023379 
 127.251333 35.872889 90.709686 
 127.251333 35.873000 90.494492 
 127.251333 35.873111 90.378457 
 127.251444 35.873111 92.064958 
 127.251444 35.873222 91.837278 
 127.251444 35.873333 91.708317 
 127.251556 35.873333 93.442500 
 127.251556 35.873444 93.201953 
 127.251556 35.873556 93.060139 
 127.251667 35.873556 94.844609 
 127.251667 35.873667 94.590936 
 127.251667 35.873778 94.436011 
 127.251778 35.873778 96.267855 
 127.251778 35.873889 96.001129 
 127.251778 35.874000 95.833164 
 127.251889 35.874000 97.715137 
 127.251889 35.874111 97.434702 
 127.251889 35.874222 97.253832 
 127.251889 35.874333 97.171941 
 127.252000 35.874333 98.889166 
 127.252000 35.874444 98.695089 
 127.252000 35.874556 98.600003 
 127.252111 35.874556 100.366861 
 127.252111 35.874667 100.159315 
 127.252111 35.874778 100.050770 
 127.252222 35.874778 101.864368 
 127.252222 35.874889 101.643128 
 127.252222 35.875000 101.521490 
 127.252333 35.875000 103.384547 
 127.252333 35.875111 103.149621 
 127.252333 35.875222 103.014354 
 127.252444 35.875222 104.923825 
 127.252444 35.875333 104.675280 
 127.252444 35.875444 104.526453 
 127.252444 35.875556 104.476865 
 127.252556 35.875556 106.222776 
 127.252556 35.875667 106.059929 
 127.252556 35.875778 105.996719 
 127.252667 35.875778 107.788712 
 127.252667 35.875889 107.612082 
 127.252667 35.876000 107.535147 
 127.252778 35.876000 109.375901 
 127.252778 35.876111 109.185222 
 127.252778 35.876222 109.094295 
 127.252889 35.876222 110.980793 
 127.252889 35.876333 110.776132 
 127.252889 35.876444 110.671279 
 127.253000 35.876444 112.606345 
 127.253000 35.876556 112.387434 
 127.253000 35.876667 112.268267 
 127.253111 35.876778 114.015758 
 127.253111 35.876889 113.882439 
 127.253111 35.877000 113.848904 
 127.253222 35.877000 115.663870 
 127.253222 35.877111 115.516129 
 127.253222 35.877222 115.468228 
 127.253333 35.877222 117.328250 
 127.253333 35.877333 117.166151 
 127.253333 35.877445 117.103927 
 127.253444 35.877445 119.011416 
 127.253444 35.877556 118.835078 
 127.253444 35.877667 118.758257 
 127.253556 35.877667 120.710450 
 127.253556 35.877778 120.519574 
 127.253556 35.877889 120.428220 
 127.253667 35.877889 122.428039 
 127.253667 35.878000 122.222352 
 127.253667 35.878111 122.116194 
 127.253667 35.878222 122.109963 
 127.253778 35.878222 123.939929 
 127.253778 35.878333 123.819029 
 127.253778 35.878445 123.798163 
 127.253889 35.878445 125.674839 
 127.253889 35.878556 125.539245 
 127.253889 35.878667 125.503395 
 127.254000 35.878667 127.424065 
 127.254000 35.878778 127.273546 
 127.254000 35.878889 127.222775 
 127.254111 35.878889 129.190308 
 127.254111 35.879000 129.024590 
 127.254111 35.879111 128.958624 
 127.254222 35.879111 130.969791 
 127.254222 35.879222 130.788712 
 127.254222 35.879333 130.707840 
 127.254222 35.879445 130.726929 
 127.254333 35.879445 132.569132 
 127.254333 35.879556 132.472880 
 127.254333 35.879667 132.476593 
 127.254444 35.879667 134.362069 
 127.254444 35.879778 134.250499 
 127.254444 35.879889 134.238897 
 127.254556 35.879889 136.170458 
 127.254556 35.880000 136.043162 
 127.254556 35.880111 136.016103 
 127.254667 35.880111 137.990572 
 127.254667 35.880222 137.847720 
 127.254667 35.880333 137.805159 
 127.254778 35.880333 139.825486 
 127.254778 35.880444 139.666800 
 127.254778 35.880555 139.608461 
 127.254778 35.880667 139.650303 
 127.254889 35.880667 141.496874 
 127.254889 35.880778 141.422821 
 127.254889 35.880889 141.448949 
 127.255000 35.880889 143.340814 
 127.255000 35.881000 143.250701 
 127.255000 35.881111 143.260908 
 127.255111 35.881111 145.196655 
 127.255111 35.881222 145.090416 
 127.255111 35.881333 145.084553 
 127.255222 35.881333 147.062295 
 127.255222 35.881444 146.939992 
 127.255222 35.881555 146.918121 
 127.255333 35.881555 148.940810 
 127.255333 35.881667 148.802166 
 127.255333 35.881778 148.764031 
 127.255333 35.881889 148.826245 
 127.255444 35.881889 150.673403 
 127.255444 35.882000 150.619018 
 127.255444 35.882111 150.665037 
 127.255556 35.882111 152.556574 
 127.255556 35.882222 152.485661 
 127.255556 35.882333 152.515208 
 127.255667 35.882333 154.448009 
 127.255667 35.882444 154.360630 
 127.255667 35.882556 154.373877 
 127.255778 35.882556 156.350448 
 127.255778 35.882667 156.246591 
 127.255778 35.882778 156.243122 
 127.255889 35.882778 158.260589 
 127.255889 35.882889 158.140080 
 127.255889 35.883000 158.119959 
 127.255889 35.883111 158.200326 
 127.256000 35.883111 160.043896 
 127.256000 35.883222 160.006844 
 127.256000 35.883333 160.070337 
 127.256111 35.883333 161.954442 
 127.256111 35.883444 161.900523 
 127.256111 35.883556 161.947372 
 127.256222 35.883556 163.874442 
 127.256222 35.883667 163.803585 
 127.256222 35.883778 163.833316 
 127.256333 35.883778 165.800555 
 127.256333 35.883889 165.712646 
 127.256333 35.884000 165.725323 
 127.256444 35.884000 167.735665 
 127.256444 35.884111 167.630427 
 127.256444 35.884222 167.625771 
 127.256444 35.884333 167.721998 
 127.256556 35.884333 169.553288 
 127.256556 35.884444 169.531489 
 127.256556 35.884556 169.610475 
 127.256667 35.884556 171.484302 
 127.256667 35.884667 171.444987 
 127.256667 35.884778 171.506453 
 127.256778 35.884778 173.419730 
 127.256778 35.884889 173.362964 
 127.256778 35.885000 173.406978 
 127.256889 35.885000 175.362556 
 127.256889 35.885111 175.288062 
 127.256889 35.885222 175.314344 
 127.257000 35.885222 177.309010 
 127.257000 35.885333 177.216783 
 127.257000 35.885444 177.225471 
 127.257000 35.885556 177.335136 
 127.257111 35.885556 179.152009 
 127.257111 35.885667 179.142785 
 127.257111 35.885778 179.234533 
 127.257222 35.885778 181.090147 
 127.257222 35.885889 181.063078 
 127.257222 35.886000 181.136978 
 127.257333 35.886000 183.034097 
 127.257333 35.886111 182.988915 
 127.257333 35.886222 183.044679 
 127.257444 35.886222 184.980184 
 127.257444 35.886333 184.916917 
 127.257444 35.886444 184.954653 
 127.257556 35.886444 186.931434 
 127.257556 35.886556 186.849804 
 127.257556 35.886667 186.869237 
 127.257556 35.886778 186.989829 
 127.257667 35.886778 188.784127 
 127.257667 35.886889 188.785413 
 127.257667 35.887000 188.887677 
 127.257778 35.887000 190.722694 
 127.257778 35.887111 190.705437 
 127.257778 35.887222 190.789217 
 127.257889 35.887222 192.661932 
 127.257889 35.887333 192.626203 
 127.257889 35.887444 192.691568 
 127.258000 35.887444 194.604778 
 127.258000 35.887556 194.550301 
 127.258000 35.887667 194.596976 
 127.258111 35.887667 196.547539 
 127.258111 35.887778 196.474385 
 127.258111 35.887889 196.502578 
 127.258222 35.887889 198.493031 
 127.258222 35.888000 198.401171 
 127.258222 35.888111 198.410438 
 127.258222 35.888222 198.520833 
 127.258333 35.888222 200.327196 
 127.258333 35.888333 200.317611 
 127.258333 35.888444 200.409212 
 127.258444 35.888444 202.255301 
 127.258444 35.888556 202.226589 
 127.258444 35.888667 202.299335 
 127.258556 35.888667 204.181736 
 127.258556 35.888778 204.134141 
 127.258556 35.888889 204.187860 
 127.258667 35.888889 206.109772 
 127.258667 35.889000 206.042884 
 127.258667 35.889111 206.077303 
 127.258778 35.889111 208.035577 
 127.258778 35.889222 207.949471 
 127.258778 35.889333 207.964667 
 127.258778 35.889444 208.081143 
 127.258889 35.889444 209.856644 
 127.258889 35.889556 209.852343 
 127.258889 35.889667 209.949637 
 127.259000 35.889667 211.760814 
 127.259000 35.889778 211.737221 
 127.259000 35.889889 211.815122 
 127.259111 35.889889 213.665066 
 127.259111 35.890000 213.621817 
 127.259111 35.890111 213.680053 
 127.259222 35.890111 215.565734 
 127.259222 35.890222 215.502905 
 127.259222 35.890333 215.541556 
 127.259333 35.890333 217.465801 
 127.259333 35.890445 217.383069 
 127.259333 35.890556 217.401919 
 127.259333 35.890667 217.522446 
 127.259444 35.890667 219.259050 
 127.259444 35.890778 219.258158 
 127.259444 35.890889 219.358936 
 127.259556 35.890889 221.133584 
 127.259556 35.891000 221.112682 
 127.259556 35.891111 221.193441 
 127.259667 35.891111 223.003228 
 127.259667 35.891222 222.962413 
 127.259667 35.891333 223.023219 
 127.259778 35.891333 224.870858 
 127.259778 35.891445 224.809813 
 127.259778 35.891556 224.850450 
 127.259889 35.891556 226.732923 
 127.259889 35.891667 226.651730 
 127.259889 35.891778 226.672281 
 127.259889 35.891889 226.794676 
 127.260000 35.891889 228.490813 
 127.260000 35.892000 228.491012 
 127.260000 35.892111 228.593047 
 127.260111 35.892111 230.323752 
 127.260111 35.892222 230.303737 
 127.260111 35.892333 230.385444 
 127.260222 35.892333 232.153314 
 127.260222 35.892444 232.112733 
 127.260222 35.892555 232.173936 
 127.260333 35.892555 233.976083 
 127.260333 35.892667 233.915022 
 127.260333 35.892778 233.955809 
 127.260444 35.892778 235.794946 
 127.260444 35.892889 235.713142 
 127.260444 35.893000 235.733370 
 127.260444 35.893111 235.855363 
 127.260556 35.893111 237.505404 
 127.260556 35.893222 237.504830 
 127.260556 35.893333 237.606082 
 127.260667 35.893333 239.290015 
 127.260667 35.893444 239.268727 
 127.260667 35.893555 239.349330 
 127.260778 35.893555 241.069685 
 127.260778 35.893667 241.027424 
 127.260778 35.893778 241.087307 
 127.260889 35.893778 242.840894 
 127.260889 35.893889 242.777946 
 127.260889 35.894000 242.816975 
 127.261000 35.894000 244.606826 
 127.261000 35.894111 244.522773 
 127.261000 35.894222 244.540688 
 127.261000 35.894333 244.660538 
 127.261111 35.894333 246.258829 
 127.261111 35.894444 246.255723 
 127.261111 35.894555 246.354617 
 127.261222 35.894555 247.988706 
 127.261222 35.894667 247.964323 
 127.261222 35.894778 248.042225 
 127.261333 35.894778 249.709064 
 127.261333 35.894889 249.663665 
 127.261333 35.895000 249.720414 
 127.261444 35.895000 251.422906 
 127.261444 35.895111 251.356106 
 127.261444 35.895222 251.391445 
 127.261556 35.895222 253.126825 
 127.261556 35.895333 253.038723 
 127.261556 35.895444 253.052750 
 127.261556 35.895556 253.169175 
 127.261667 35.895556 254.713886 
 127.261667 35.895667 254.706448 
 127.261667 35.895778 254.801336 
 127.261778 35.895778 256.378738 
 127.261778 35.895889 256.349872 
 127.261778 35.896000 256.423323 
 127.261889 35.896000 258.035801 
 127.261889 35.896111 257.985255 
 127.261889 35.896222 258.037016 
 127.262000 35.896222 259.681954 
 127.262000 35.896333 259.609830 
 127.262000 35.896444 259.640005 
 127.262111 35.896444 261.319897 
 127.262111 35.896556 261.225870 
 127.262111 35.896667 261.234281 
 127.262222 35.896778 262.830623 
 127.262222 35.896889 262.817340 
 127.262222 35.897000 262.906543 
 127.262333 35.897000 264.426510 
 127.262333 35.897111 264.391284 
 127.262333 35.897222 264.458535 
 127.262444 35.897222 266.010573 
 127.262444 35.897333 265.953501 
 127.262444 35.897444 265.998917 
 127.262556 35.897444 267.585382 
 127.262556 35.897556 267.506190 
 127.262556 35.897667 267.529553 
 127.262667 35.897667 269.147883 
 127.262667 35.897778 269.046680 
 127.262667 35.897889 269.048100 
 127.262778 35.897889 270.700758 
 127.262778 35.898000 270.577300 
 127.262778 35.898111 270.556584 
 127.262778 35.898222 270.638410 
 127.262889 35.898222 272.095255 
 127.262889 35.898333 272.052426 
 127.262889 35.898444 272.112206 
 127.263000 35.898444 273.602988 
 127.263000 35.898556 273.537802 
 127.263000 35.898667 273.575292 
 127.263111 35.898667 275.097608 
 127.263111 35.898778 275.010179 
 127.263111 35.898889 275.025496 
 127.263222 35.898889 276.581668 
 127.263222 35.899000 276.471757 
 127.263222 35.899111 276.464734 
 127.263333 35.899111 278.051869 
 127.263333 35.899222 277.919908 
 127.263333 35.899333 277.890550 
 127.263333 35.899444 277.963924 
 127.263444 35.899444 279.356940 
 127.263444 35.899556 279.305008 
 127.263444 35.899667 279.355876 
 127.263556 35.899667 280.780136 
 127.263556 35.899778 280.705749 
 127.263556 35.899889 280.734368 
 127.263667 35.899889 282.191658 
 127.263667 35.900000 282.094834 
 127.263667 35.900111 282.100792 
 127.263778 35.900111 283.589166 
 127.263778 35.900222 283.469812 
 127.263778 35.900333 283.453230 
 127.263889 35.900333 284.974971 
 127.263889 35.900444 284.832853 
 127.263889 35.900556 284.793498 
 127.263889 35.900667 284.857070 
 127.264000 35.900667 286.181413 
 127.264000 35.900778 286.119410 
 127.264000 35.900889 286.160562 
 127.264111 35.900889 287.517539 
 127.264111 35.901000 287.432890 
 127.264111 35.901111 287.451191 
 127.264222 35.901111 288.839025 
 127.264222 35.901222 288.731661 
 127.264222 35.901333 288.727240 
 127.264333 35.901333 290.148066 
 127.264333 35.901444 290.017758 
 127.264333 35.901556 289.990383 
 127.264444 35.901556 291.441933 
 127.264444 35.901667 291.288637 
 127.264444 35.901778 291.238615 
 127.264444 35.901889 291.291723 
 127.264556 35.901889 292.546750 
 127.264556 35.902000 292.473717 
 127.264556 35.902111 292.503806 
 127.264667 35.902111 293.789505 
 127.264667 35.902222 293.693594 
 127.264667 35.902333 293.700796 
 127.264778 35.902333 295.019152 
 127.264778 35.902445 294.900021 
 127.264778 35.902556 294.884227 
 127.264889 35.902556 296.233143 
 127.264889 35.902667 296.091004 
 127.264889 35.902778 296.052273 
 127.265000 35.902778 297.433836 
 127.265000 35.902889 297.268466 
 127.265000 35.903000 297.206574 
 127.265000 35.903111 297.247974 
 127.265111 35.903111 298.430130 
 127.265111 35.903222 298.345216 
 127.265111 35.903333 298.363585 
 127.265222 35.903333 299.578105 
 127.265222 35.903445 299.469850 
 127.265222 35.903556 299.465064 
 127.265333 35.903556 300.710023 
 127.265333 35.903667 300.578626 
 127.265333 35.903778 300.550769 
 127.265444 35.903778 301.828102 
 127.265444 35.903889 301.673343 
 127.265444 35.904000 301.622197 
 127.265556 35.904000 302.929884 
 127.265556 35.904111 302.751908 
 127.265556 35.904222 302.677576 
 127.265556 35.904333 302.706777 
 127.265667 35.904333 303.816284 
 127.265667 35.904445 303.718549 
 127.265667 35.904556 303.724419 
 127.265778 35.904556 304.864288 
 127.265778 35.904667 304.743297 
 127.265778 35.904778 304.725982 
 127.265889 35.904778 305.897993 
 127.265889 35.904889 305.753531 
 127.265889 35.905000 305.712836 
 127.266000 35.905000 306.915885 
 127.266000 35.905111 306.748297 
 127.266000 35.905222 306.684130 
 127.266111 35.905222 307.917448 
 127.266111 35.905333 307.726547 
 127.266111 35.905444 307.639060 
 127.266111 35.905555 307.655313 
 127.266222 35.905555 308.690155 
 127.266222 35.905667 308.579135 
 127.266222 35.905778 308.571929 
 127.266333 35.905778 309.637077 
 127.266333 35.905889 309.502678 
 127.266333 35.906000 309.472202 
 127.266444 35.906000 310.568932 
 127.266444 35.906111 310.411306 
 127.266444 35.906222 310.357274 
 127.266556 35.906222 311.484271 
 127.266556 35.906333 311.303253 
 127.266556 35.906444 311.225821 
 127.266667 35.906444 312.384858 
 127.266667 35.906555 312.180242 
 127.266667 35.906667 312.079204 
 127.266667 35.906778 312.082212 
 127.266778 35.906778 313.040116 
 127.266778 35.906889 312.915933 
 127.266778 35.907000 312.895525 
 127.266889 35.907000 313.885271 
 127.266889 35.907111 313.737477 
 127.266889 35.907222 313.693449 
 127.267000 35.907222 314.713501 
 127.267000 35.907333 314.542256 
 127.267000 35.907444 314.474770 
 127.267111 35.907444 315.526744 
 127.267111 35.907555 315.331846 
 127.267111 35.907667 315.240700 
 127.267222 35.907667 316.322966 
 127.267222 35.907778 316.104294 
 127.267222 35.907889 315.989937 
 127.267222 35.908000 315.979528 
 127.267333 35.908000 316.861813 
 127.267333 35.908111 316.723801 
 127.267333 35.908222 316.689729 
 127.267444 35.908222 317.602401 
 127.267444 35.908333 317.440899 
 127.267444 35.908444 317.383330 
 127.267556 35.908444 318.327848 
 127.267556 35.908556 318.142431 
 127.267556 35.908667 318.061396 
 127.267667 35.908667 319.036308 
 127.267667 35.908778 318.827332 
 127.267667 35.908889 318.722812 
 127.267778 35.909000 319.496948 
 127.267778 35.909111 319.368748 
 127.267778 35.909222 319.344662 
 127.267889 35.909222 320.149708 
 127.267889 35.909333 319.997829 
 127.267889 35.909444 319.950398 
 127.268000 35.909444 320.787254 
 127.268000 35.909556 320.611633 
 127.268000 35.909667 320.540534 
 127.268111 35.909667 321.407927 
 127.268111 35.909778 321.208737 
 127.268111 35.909889 321.114143 
 127.268222 35.909889 322.013472 
 127.268222 35.910000 321.790524 
 127.268222 35.910111 321.672246 
 127.268222 35.910222 321.658255 
 127.268333 35.910222 322.355613 
 127.268333 35.910333 322.213672 
 127.268333 35.910444 322.176319 
 127.268444 35.910444 322.905492 
 127.268444 35.910556 322.739814 
 127.268444 35.910667 322.678798 
 127.268556 35.910667 323.438690 
 127.268556 35.910778 323.249454 
 127.268556 35.910889 323.164953 
 127.268667 35.910889 323.956805 
 127.268667 35.911000 323.743825 
 127.268667 35.911111 323.635558 
 127.268778 35.911111 324.457778 
 127.268778 35.911222 324.221730 
 127.268778 35.911333 324.089933 
 127.268778 35.911444 324.062863 
 127.268889 35.911444 324.684511 
 127.268889 35.911556 324.529001 
 127.268889 35.911667 324.478291 
 127.269000 35.911667 325.130880 
 127.269000 35.911778 324.951840 
 127.269000 35.911889 324.877637 
 127.269111 35.911889 325.561847 
 127.269111 35.912000 325.359534 
 127.269111 35.912111 325.261653 
 127.269222 35.912111 325.976872 
 127.269222 35.912222 325.751074 
 127.269222 35.912333 325.629700 
 127.269333 35.912333 326.377109 
 127.269333 35.912444 326.127648 
 127.269333 35.912556 325.982603 
 127.269333 35.912667 325.942497 
 127.269444 35.912667 326.488156 
 127.269444 35.912778 326.319628 
 127.269444 35.912889 326.256092 
 127.269556 35.912889 326.833474 
 127.269556 35.913000 326.641706 
 127.269556 35.913111 326.554544 
 127.269667 35.913111 327.163210 
 127.269667 35.913222 326.948013 
 127.269667 35.913333 326.837415 
 127.269778 35.913333 327.478388 
 127.269778 35.913444 327.239588 
 127.269778 35.913556 327.105379 
 127.269889 35.913556 327.777726 
 127.269889 35.913667 327.515153 
 127.269889 35.913778 327.357886 
 127.269889 35.913889 327.305405 
 127.270000 35.913889 327.776536 
 127.270000 35.914000 327.595719 
 127.270000 35.914111 327.519680 
 127.270111 35.914111 328.022408 
 127.270111 35.914222 327.818235 
 127.270111 35.914333 327.718832 
 127.270222 35.914333 328.254023 
 127.270222 35.914444 328.026323 
 127.270222 35.914556 327.903387 
 127.270333 35.914556 328.470279 
 127.270333 35.914667 328.218908 
 127.270333 35.914778 328.072976 
 127.270333 35.914889 328.032004 
 127.270444 35.914889 328.397629 
 127.270444 35.915000 328.228232 
 127.270444 35.915111 328.163787 
 127.270556 35.915111 328.561356 
 127.270556 35.915222 328.368694 
 127.270556 35.915333 328.280975 
 127.270667 35.915333 328.711196 
 127.270667 35.915445 328.494820 
 127.270667 35.915556 328.383943 
 127.270778 35.915556 328.846226 
 127.270778 35.915667 328.606579 
 127.270778 35.915778 328.472502 
 127.270889 35.915778 328.967660 
 127.270889 35.915889 328.704576 
 127.270889 35.916000 328.547137 
 127.270889 35.916111 328.494821 
 127.271000 35.916111 328.788165 
 127.271000 35.916222 328.607345 
 127.271000 35.916333 328.532081 
 127.271111 35.916333 328.858300 
 127.271111 35.916445 328.654117 
 127.271111 35.916556 328.555563 
 127.271222 35.916556 328.914237 
 127.271222 35.916667 328.686898 
 127.271222 35.916778 328.565259 
 127.271333 35.916778 328.957044 
 127.271333 35.916889 328.706386 
 127.271333 35.917000 328.561501 
 127.271333 35.917111 328.521910 
 127.271444 35.917111 328.712456 
 127.271444 35.917222 328.544150 
 127.271444 35.917333 328.481527 
 127.271556 35.917333 328.704878 
 127.271556 35.917444 328.513519 
 127.271556 35.917556 328.427913 
 127.271667 35.917556 328.684520 
 127.271667 35.917667 328.469948 
 127.271667 35.917778 328.361202 
 127.271778 35.917778 328.650760 
 127.271778 35.917889 328.413187 
 127.271778 35.918000 328.281375 
 127.271889 35.918000 328.604037 
 127.271889 35.918111 328.343844 
 127.271889 35.918222 328.188906 
 127.271889 35.918333 328.139773 
 127.272000 35.918333 328.261571 
 127.272000 35.918444 328.083719 
 127.272000 35.918555 328.011742 
 127.272111 35.918555 328.167087 
 127.272111 35.918667 327.966166 
 127.272111 35.918778 327.871191 
 127.272222 35.918778 328.059944 
 127.272222 35.918889 327.836168 
 127.272222 35.919000 327.718297 
 127.272333 35.919000 327.940458 
 127.272333 35.919111 327.694188 
 127.272333 35.919222 327.553341 
 127.272333 35.919333 327.518417 
 127.272444 35.919333 327.540048 
 127.272444 35.919444 327.376440 
 127.272444 35.919555 327.318825 
 127.272556 35.919555 327.374323 
 127.272556 35.919667 327.187801 
 127.272556 35.919778 327.107296 
 127.272667 35.919778 327.196281 
 127.272667 35.919889 326.987515 
 127.272667 35.920000 326.884345 
 127.272778 35.920000 327.007472 
 127.272778 35.920111 326.775900 
 127.272778 35.920222 326.649916 
 127.272889 35.920222 326.807103 
 127.272889 35.920333 326.552944 
 127.272889 35.920444 326.404364 
 127.272889 35.920556 326.361909 
 127.273000 35.920556 326.318694 
 127.273000 35.920667 326.147755 
 127.273000 35.920778 326.082586 
 127.273111 35.920778 326.073766 
 127.273111 35.920889 325.880343 
 127.273111 35.921000 325.792680 
 127.273222 35.921000 325.818358 
 127.273222 35.921111 325.602304 
 127.273222 35.921222 325.492001 
 127.273333 35.921222 325.552253 
 127.273333 35.921333 325.313790 
 127.273333 35.921444 325.181068 
 127.273333 35.921556 325.154606 
 127.273444 35.921556 325.014732 
 127.273444 35.921667 324.859804 
 127.273444 35.921778 324.810807 
 127.273556 35.921778 324.705855 
 127.273556 35.921889 324.528626 
 127.273556 35.922000 324.457317 
 127.273667 35.922000 324.387243 
 127.273667 35.922111 324.187568 
 127.273667 35.922222 324.093804 
 127.273778 35.922222 324.058837 
 127.273778 35.922333 323.836651 
 127.273778 35.922444 323.720947 
 127.273889 35.922556 323.476568 
 127.273889 35.922667 323.338529 
 127.273889 35.922778 323.306579 
 127.274000 35.922778 323.107271 
 127.274000 35.922889 322.947123 
 127.274000 35.923000 322.893055 
 127.274111 35.923000 322.729025 
 127.274111 35.923111 322.546405 
 127.274111 35.923222 322.470298 
 127.274222 35.923222 322.341928 
 127.274222 35.923333 322.137247 
 127.274222 35.923444 322.039145 
 127.274333 35.923444 321.946359 
 127.274333 35.923556 321.719477 
 127.274333 35.923667 321.599239 
 127.274333 35.923778 321.585247 
 127.274444 35.923778 321.293454 
 127.274444 35.923889 321.151309 
 127.274444 35.924000 321.115399 
 127.274556 35.924000 320.859304 
 127.274556 35.924111 320.694923 
 127.274556 35.924222 320.637147 
 127.274667 35.924222 320.417279 
 127.274667 35.924333 320.231045 
 127.274667 35.924444 320.151479 
 127.274778 35.924444 319.967620 
 127.274778 35.924556 319.759395 
 127.274778 35.924667 319.657902 
 127.274778 35.924778 319.662805 
 127.274889 35.924778 319.280484 
 127.274889 35.924889 319.157174 
 127.274889 35.925000 319.140489 
 127.275000 35.925000 318.794302 
 127.275000 35.925111 318.649122 
 127.275000 35.925222 318.610630 
 127.275111 35.925222 318.301250 
 127.275111 35.925333 318.134430 
 127.275111 35.925444 318.074362 
 127.275222 35.925444 317.801434 
 127.275222 35.925556 317.612840 
 127.275222 35.925667 317.531060 
 127.275333 35.925778 317.085007 
 127.275333 35.925889 316.981662 
 127.275333 35.926000 316.985020 
 127.275444 35.926000 316.550789 
 127.275444 35.926111 316.425792 
 127.275444 35.926222 316.407561 
 127.275556 35.926222 316.010728 
 127.275556 35.926333 315.864315 
 127.275556 35.926444 315.824727 
 127.275667 35.926444 315.464802 
 127.275667 35.926556 315.296837 
 127.275667 35.926667 315.235746 
 127.275778 35.926667 314.913020 
 127.275778 35.926778 314.724157 
 127.275778 35.926889 314.641774 
 127.275778 35.927000 314.666165 
 127.275889 35.927000 314.146002 
 127.275889 35.927111 314.042193 
 127.275889 35.927222 314.045218 
 127.276000 35.927222 313.563053 
 127.276000 35.927333 313.438055 
 127.276000 35.927445 313.420010 
 127.276111 35.927445 312.974815 
 127.276111 35.927556 312.828838 
 127.276111 35.927667 312.789493 
 127.276222 35.927667 312.382503 
 127.276222 35.927778 312.215476 
 127.276222 35.927889 312.155068 
 127.276222 35.928000 312.201496 
 127.276333 35.928000 311.597570 
 127.276333 35.928111 311.515967 
 127.276333 35.928222 311.541258 
 127.276444 35.928222 310.975935 
 127.276444 35.928333 310.873374 
 127.276444 35.928445 310.877864 
 127.276556 35.928445 310.349988 
 127.276556 35.928556 310.226643 
 127.276556 35.928667 310.210064 
 127.276667 35.928667 309.720999 
 127.276667 35.928778 309.576838 
 127.276667 35.928889 309.539430 
 127.276778 35.928889 309.088541 
 127.276778 35.929000 308.923435 
 127.276778 35.929111 308.865066 
 127.276778 35.929222 308.913817 
 127.276889 35.929222 308.266844 
 127.276889 35.929333 308.187796 
 127.276889 35.929445 308.215660 
 127.277000 35.929445 307.608005 
 127.277000 35.929556 307.508325 
 127.277000 35.929667 307.515540 
 127.277111 35.929667 306.946381 
 127.277111 35.929778 306.825939 
 127.277111 35.929889 306.812376 
 127.277222 35.929889 306.282739 
 127.277222 35.930000 306.141623 
 127.277222 35.930111 306.107671 
 127.277222 35.930222 306.180772 
 127.277333 35.930222 305.455054 
 127.277333 35.930333 305.400469 
 127.277333 35.930444 305.452920 
 127.277444 35.930444 304.767128 
 127.277444 35.930555 304.692149 
 127.277444 35.930667 304.724189 
 127.277556 35.930667 304.077382 
 127.277556 35.930778 303.981880 
 127.277556 35.930889 303.993379 
 127.277667 35.930889 303.386702 
 127.277667 35.931000 303.270810 
 127.277667 35.931111 303.262116 
 127.277778 35.931111 302.694748 
 127.277778 35.931222 302.558411 
 127.277778 35.931333 302.529323 
 127.277778 35.931444 302.607388 
 127.277889 35.931444 301.845741 
 127.277889 35.931555 301.796499 
 127.277889 35.931667 301.854392 
 127.278000 35.931667 301.132218 
 127.278000 35.931778 301.062666 
 127.278000 35.931889 301.100285 
 127.278111 35.931889 300.418847 
 127.278111 35.932000 300.329219 
 127.278111 35.932111 300.346811 
 127.278222 35.932111 299.705169 
 127.278222 35.932222 299.595338 
 127.278222 35.932333 299.592776 
 127.278222 35.932444 299.697480 
 127.278333 35.932444 298.862271 
 127.278333 35.932555 298.839796 
 127.278333 35.932667 298.924565 
 127.278444 35.932667 298.129318 
 127.278444 35.932778 298.086820 
 127.278444 35.932889 298.151509 
 127.278556 35.932889 297.397599 
 127.278556 35.933000 297.335266 
 127.278556 35.933111 297.380167 
 127.278667 35.933111 296.666539 
 127.278667 35.933222 296.584245 
 127.278667 35.933333 296.609231 
 127.278778 35.933333 295.937131 
 127.278778 35.933444 295.835115 
 127.278778 35.933556 295.840528 
 127.278778 35.933667 295.953085 
 127.278889 35.933667 295.087063 
 127.278889 35.933778 295.072641 
 127.278889 35.933889 295.165408 
 127.279000 35.933889 294.341318 
 127.279000 35.934000 294.307301 
 127.279000 35.934111 294.380519 
 127.279111 35.934111 293.597193 
 127.279111 35.934222 293.543454 
 127.279111 35.934333 293.597180 
 127.279222 35.934333 292.855569 
 127.279222 35.934444 292.782567 
 127.279222 35.934556 292.816822 
 127.279333 35.934556 292.116289 
 127.279333 35.934667 292.023713 
 127.279333 35.934778 292.038372 
 127.279333 35.934889 292.160214 
 127.279444 35.934889 291.268227 
 127.279444 35.935000 291.263529 
 127.279444 35.935111 291.366057 
 127.279556 35.935111 290.515311 
 127.279556 35.935222 290.491130 
 127.279556 35.935333 290.574452 
 127.279667 35.935333 289.766001 
 127.279667 35.935444 289.722743 
 127.279667 35.935556 289.786831 
 127.279778 35.935556 289.019929 
 127.279778 35.935667 288.957335 
 127.279778 35.935778 289.002061 
 127.279889 35.935889 288.196338 
 127.279889 35.936000 288.221944 
 127.279889 35.936111 288.355075 
 127.280000 35.936111 287.438769 
 127.280000 35.936222 287.445207 
 127.280000 35.936333 287.559097 
 127.280111 35.936333 286.686055 
 127.280111 35.936444 286.673517 
 127.280111 35.936556 286.768405 
 127.280222 35.936556 285.937375 
 127.280222 35.936667 285.905734 
 127.280222 35.936778 285.981493 
 127.280333 35.936778 285.193892 
 127.280333 35.936889 285.143389 
 127.280333 35.937000 285.200258 
 127.280444 35.937111 284.385444 
 127.280444 35.937222 284.423323 
 127.280444 35.937333 284.568727 
 127.280556 35.937333 283.633315 
 127.280556 35.937444 283.652448 
 127.280556 35.937556 283.779078 
 127.280667 35.937556 282.886130 
 127.280667 35.937667 282.886390 
 127.280667 35.937778 282.994119 
 127.280778 35.937778 282.145145 
 127.280778 35.937889 282.126831 
 127.280778 35.938000 282.215836 
 127.280889 35.938000 281.409615 
 127.280889 35.938111 281.372507 
 127.280889 35.938222 281.442753 
 127.281000 35.938333 280.624993 
 127.281000 35.938444 280.676718 
 127.281000 35.938556 280.836002 
 127.281111 35.938556 279.883312 
 127.281111 35.938667 279.916536 
 127.281111 35.938778 280.056992 
 127.281222 35.938778 279.148805 
 127.281222 35.938889 279.163587 
 127.281222 35.939000 279.285632 
 127.281333 35.939000 278.420629 
 127.281333 35.939111 278.416840 
 127.281333 35.939222 278.520347 
 127.281444 35.939222 277.699987 
 127.281444 35.939333 277.677865 
 127.281444 35.939444 277.763069 
 127.281556 35.939444 276.986168 
 127.281556 35.939556 276.945583 
 127.281556 35.939667 277.012564 
 127.281556 35.939778 277.186711 
 127.281667 35.939778 276.221423 
 127.281667 35.939889 276.270179 
 127.281667 35.940000 276.426130 
 127.281778 35.940000 275.504442 
 127.281778 35.940111 275.534843 
 127.281778 35.940222 275.672469 
 127.281889 35.940222 274.795926 
 127.281889 35.940333 274.808208 
 127.281889 35.940445 274.928043 
 127.282000 35.940445 274.094963 
 127.282000 35.940556 274.089101 
 127.282000 35.940667 274.190685 
 127.282111 35.940667 273.402871 
 127.282111 35.940778 273.379028 
 127.282111 35.940889 273.462597 
 127.282111 35.941000 273.653282 
 127.282222 35.941000 272.676953 
 127.282222 35.941111 272.742377 
 127.282222 35.941222 272.915332 
 127.282333 35.941222 271.983698 
 127.282333 35.941333 272.031040 
 127.282333 35.941445 272.185897 
 127.282444 35.941445 271.299942 
 127.282444 35.941556 271.329456 
 127.282444 35.941667 271.466450 
 127.282556 35.941667 270.624873 
 127.282556 35.941778 270.636431 
 127.282556 35.941889 270.755430 
 127.282667 35.941889 269.959638 
 127.282667 35.942000 269.953471 
 127.282667 35.942111 270.054710 
 127.282667 35.942222 270.263444 
 127.282778 35.942222 269.279569 
 127.282778 35.942333 269.362864 
 127.282778 35.942444 269.553699 
 127.282889 35.942444 268.615956 
 127.282889 35.942556 268.681622 
 127.282889 35.942667 268.854789 
 127.283000 35.942667 267.961789 
 127.283000 35.942778 268.009695 
 127.283000 35.942889 268.165063 
 127.283111 35.942889 267.318287 
 127.283111 35.943000 267.348808 
 127.283111 35.943111 267.486464 
 127.283222 35.943111 266.684663 
 127.283222 35.943222 266.697494 
 127.283222 35.943333 266.817479 
 127.283333 35.943333 266.061987 
 127.283333 35.943444 266.057359 
 127.283333 35.943555 266.159905 
 127.283333 35.943667 266.369963 
 127.283444 35.943667 265.427392 
 127.283444 35.943778 265.512366 
 127.283444 35.943889 265.704811 
 127.283556 35.943889 264.808879 
 127.283556 35.944000 264.876720 
 127.283556 35.944111 265.051572 
 127.283667 35.944111 264.200948 
 127.283667 35.944222 264.251282 
 127.283667 35.944333 264.408647 
 127.283778 35.944333 263.604733 
 127.283778 35.944444 263.637792 
 127.283778 35.944555 263.777898 
 127.283889 35.944555 263.019502 
 127.283889 35.944667 263.035152 
 127.283889 35.944778 263.158168 
 127.283889 35.944889 263.388047 
 127.284000 35.944889 262.444711 
 127.284000 35.945000 262.550533 
 127.284000 35.945111 262.763233 
 127.284111 35.945111 261.865513 
 127.284111 35.945222 261.954005 
 127.284111 35.945333 262.149390 
 127.284222 35.945333 261.298756 
 127.284222 35.945444 261.370147 
 127.284222 35.945556 261.548843 
 127.284333 35.945556 260.743625 
 127.284333 35.945667 260.797777 
 127.284333 35.945778 260.959219 
 127.284444 35.945778 260.201138 
 127.284444 35.945889 260.238308 
 127.284444 35.946000 260.382723 
 127.284556 35.946000 259.670645 
 127.284556 35.946111 259.690698 
 127.284556 35.946222 259.817949 
 127.284556 35.946333 260.051942 
 127.284667 35.946333 259.156209 
 127.284667 35.946444 259.266522 
 127.284667 35.946556 259.484052 
 127.284778 35.946556 258.634009 
 127.284778 35.946667 258.727177 
 127.284778 35.946778 258.927613 
 127.284889 35.946778 258.125040 
 127.284889 35.946889 258.201387 
 127.284889 35.947000 258.384952 
 127.285000 35.947000 257.628641 
 127.285000 35.947111 257.688028 
 127.285000 35.947222 257.854585 
 127.285111 35.947222 257.145769 
 127.285111 35.947333 257.188585 
 127.285111 35.947444 257.338191 
 127.285222 35.947444 256.675805 
 127.285222 35.947556 256.701718 
 127.285222 35.947667 256.834429 
 127.285222 35.947778 257.074372 
 127.285333 35.947778 256.228787 
 127.285333 35.947889 256.344825 
 127.285333 35.948000 256.568044 
 127.285444 35.948000 255.768953 
 127.285444 35.948111 255.868440 
 127.285444 35.948222 256.074532 
 127.285556 35.948222 255.323229 
 127.285556 35.948333 255.406096 
 127.285556 35.948444 255.595573 
 127.285667 35.948444 254.890916 
 127.285667 35.948556 254.957023 
 127.285667 35.948667 255.129744 
 127.285778 35.948667 254.472876 
 127.285778 35.948778 254.522443 
 127.285778 35.948889 254.678628 
 127.285778 35.949000 254.941947 
 127.285889 35.949000 254.101438 
 127.285889 35.949111 254.241278 
 127.285889 35.949222 254.487533 
 127.286000 35.949222 253.695074 
 127.286000 35.949333 253.818428 
 127.286000 35.949444 254.048199 
 127.286111 35.949444 253.302578 
 127.286111 35.949556 253.409303 
 127.286111 35.949667 253.622446 
 127.286222 35.949667 252.924860 
 127.286222 35.949778 253.015175 
 127.286222 35.949889 253.212339 
 127.286333 35.949889 252.561325 
 127.286333 35.950000 252.635051 
 127.286333 35.950111 252.815634 
 127.286444 35.950111 252.212631 
 127.286444 35.950222 252.270049 
 127.286444 35.950333 252.434267 
 127.286444 35.950444 252.704694 
 127.286556 35.950444 251.919318 
 127.286556 35.950556 252.067027 
 127.286556 35.950667 252.320945 
 127.286667 35.950667 251.583821 
 127.286667 35.950778 251.715238 
 127.286667 35.950889 251.953360 
 127.286778 35.950889 251.262957 
 127.286778 35.951000 251.377829 
 127.286778 35.951111 251.599484 
 127.286889 35.951111 250.957293 
 127.286889 35.951222 251.055970 
 127.286889 35.951333 251.261370 
 127.287000 35.951333 250.666398 
 127.287000 35.951444 250.748735 
 127.287000 35.951556 250.937735 
 127.287111 35.951556 250.390926 
 127.287111 35.951667 250.457342 
 127.287111 35.951778 250.629948 
 127.287111 35.951889 250.909310 
 127.287222 35.951889 250.180569 
 127.287222 35.952000 250.336870 
 127.287222 35.952111 250.599864 
 127.287333 35.952111 249.919508 
 127.287333 35.952222 250.059714 
 127.287333 35.952333 250.306552 
 127.287444 35.952333 249.673519 
 127.287444 35.952445 249.797788 
 127.287444 35.952556 250.028017 
 127.287556 35.952556 249.443303 
 127.287556 35.952667 249.551514 
 127.287556 35.952778 249.765677 
 127.287667 35.952778 249.228365 
 127.287667 35.952889 249.320370 
 127.287667 35.953000 249.518318 
 127.287778 35.953000 249.029064 
 127.287778 35.953111 249.104894 
 127.287778 35.953222 249.286658 
 127.287778 35.953333 249.574951 
 127.287889 35.953333 248.905471 
 127.287889 35.953445 249.071636 
 127.287889 35.953556 249.343511 
 127.288000 35.953556 248.721462 
 127.288000 35.953667 248.871475 
 127.288000 35.953778 249.127187 
 127.288111 35.953778 248.553537 
 127.288111 35.953889 248.687605 
 127.288111 35.954000 248.927360 
 127.288222 35.954000 248.401200 
 127.288222 35.954111 248.519173 
 127.288222 35.954222 248.743297 
 127.288333 35.954222 248.265048 
 127.288333 35.954333 248.367049 
 127.288333 35.954445 248.575245 
 127.288444 35.954445 248.144535 
 127.288444 35.954556 248.230524 
 127.288444 35.954667 248.422640 
 127.288444 35.954778 248.720189 
 127.288556 35.954778 248.110312 
 127.288556 35.954889 248.286553 
 127.288556 35.955000 248.568213 
 127.288667 35.955000 248.005847 
 127.288667 35.955111 248.166061 
 127.288667 35.955222 248.432227 
 127.288778 35.955222 247.917844 
 127.288778 35.955333 248.062078 
 127.288778 35.955444 248.312378 
 127.288889 35.955444 247.845540 
 127.288889 35.955555 247.973826 
 127.288889 35.955667 248.208106 
 127.289000 35.955667 247.789521 
 127.289000 35.955778 247.902061 
 127.289000 35.955889 248.120525 
 127.289111 35.955889 247.749509 
 127.289111 35.956000 247.846408 
 127.289111 35.956111 248.048643 
 127.289111 35.956222 248.356873 
 127.289222 35.956222 247.806924 
 127.289222 35.956333 247.993416 
 127.289222 35.956444 248.285831 
 127.289333 35.956444 247.783404 
 127.289333 35.956555 247.953999 
 127.289333 35.956667 248.230442 
 127.289444 35.956667 247.776292 
 127.289444 35.956778 247.931547 
 127.289444 35.956889 248.191862 
 127.289556 35.956889 247.785242 
 127.289556 35.957000 247.924618 
 127.289556 35.957111 248.169033 
 127.289667 35.957111 247.810543 
 127.289667 35.957222 247.934239 
 127.289667 35.957333 248.162952 
 127.289778 35.957444 247.959851 
 127.289778 35.957555 248.172706 
 127.289778 35.957667 248.491250 
 127.289889 35.957667 248.001942 
 127.289889 35.957778 248.199567 
 127.289889 35.957889 248.501944 
 127.290000 35.957889 248.060097 
 127.290000 35.958000 248.241877 
 127.290000 35.958111 248.528385 
 127.290111 35.958111 248.134649 
 127.290111 35.958222 248.300780 
 127.290111 35.958333 248.571616 
 127.290222 35.958333 248.225324 
 127.290222 35.958444 248.375649 
 127.290222 35.958556 248.631184 
 127.290333 35.958556 248.332443 
 127.290333 35.958667 248.467016 
 127.290333 35.958778 248.706887 
 127.290444 35.958889 248.574396 
 127.290444 35.959000 248.798445 
 127.290444 35.959111 249.126900 
 127.290556 35.959111 248.698165 
 127.290556 35.959222 248.906586 
 127.290556 35.959333 249.220015 
 127.290667 35.959333 248.838225 
 127.290667 35.959444 249.030617 
 127.290667 35.959556 249.328203 
 127.290778 35.959556 248.994286 
 127.290778 35.959667 249.171111 
 127.290778 35.959778 249.453047 
 127.290889 35.959778 249.166420 
 127.290889 35.959889 249.327517 
 127.290889 35.960000 249.593642 
 127.291000 35.960000 249.354693 
 127.291000 35.960111 249.500253 
 127.291000 35.960222 249.750759 
 127.291111 35.960333 249.689227 
 127.291111 35.960444 249.923638 
 127.291111 35.960556 250.263045 
 127.291222 35.960556 249.894047 
 127.291222 35.960667 250.112894 
 127.291222 35.960778 250.436653 
 127.291333 35.960778 250.114789 
 127.291333 35.960889 250.317911 
 127.291333 35.961000 250.625858 
 127.291444 35.961000 250.351564 
 127.291444 35.961111 250.539562 
 127.291444 35.961222 250.831475 
 127.291556 35.961222 250.604248 
 127.291556 35.961333 250.776520 
 127.291556 35.961444 251.052675 
 127.291667 35.961444 250.872799 
 127.291667 35.961556 251.029534 
 127.291667 35.961667 251.290117 
 127.291778 35.961778 251.298269 
 127.291778 35.961889 251.543119 
 127.291778 35.962000 251.892578 
 127.291889 35.962000 251.582882 
 127.291889 35.962111 251.812668 
 127.291889 35.962222 252.146007 
 127.292000 35.962222 251.883180 
 127.292000 35.962333 252.097227 
 127.292000 35.962444 252.414793 
 127.292111 35.962444 252.199166 
 127.292111 35.962556 252.397661 
 127.292111 35.962667 252.699638 
 127.292222 35.962667 252.530791 
 127.292222 35.962778 252.713569 
 127.292222 35.962889 253.000373 
 127.292333 35.962889 252.878102 
 127.292333 35.963000 253.045150 
 127.292333 35.963111 253.316358 
 127.292444 35.963111 253.240767 
 127.292444 35.963222 253.392145 
 127.292444 35.963333 253.647591 
 127.292444 35.963444 254.006179 
 127.292556 35.963444 253.754603 
 127.292556 35.963556 253.994471 
 127.292556 35.963667 254.338121 
 127.292667 35.963667 254.132701 
 127.292667 35.963778 254.356528 
 127.292667 35.963889 254.684367 
 127.292778 35.963889 254.525717 
 127.292778 35.964000 254.734010 
 127.292778 35.964111 255.046220 
 127.292889 35.964111 254.933996 
 127.292889 35.964222 255.126588 
 127.292889 35.964333 255.423001 
 127.293000 35.964333 255.357285 
 127.293000 35.964444 255.534357 
 127.293000 35.964556 255.815156 
 127.293111 35.964667 255.957497 
 127.293111 35.964778 256.222148 
 127.293111 35.964889 256.590556 
 127.293222 35.964889 256.395232 
 127.293222 35.965000 256.644133 
 127.293222 35.965111 256.996696 
 127.293333 35.965111 256.847790 
 127.293333 35.965222 257.081123 
 127.293333 35.965333 257.418020 
 127.293444 35.965333 257.315195 
 127.293444 35.965445 257.533255 
 127.293444 35.965556 257.853854 
 127.293556 35.965556 257.797166 
 127.293556 35.965667 257.999642 
 127.293556 35.965778 258.304612 
 127.293667 35.965778 258.293867 
 127.293667 35.965889 258.480589 
 127.293667 35.966000 258.769762 
 127.293778 35.966111 258.976016 
 127.293778 35.966222 259.250128 
 127.293778 35.966333 259.626413 
 127.293889 35.966333 259.485874 
 127.293889 35.966445 259.744170 
 127.293889 35.966556 260.104593 
 127.294000 35.966556 260.009934 
 127.294000 35.966667 260.252591 
 127.294000 35.966778 260.597328 
 127.294111 35.966778 260.548288 
 127.294111 35.966889 260.775136 
 127.294111 35.967000 261.104017 
 127.294222 35.967000 261.100558 
 127.294222 35.967111 261.311774 
 127.294222 35.967222 261.625602 
 127.294333 35.967222 261.667223 
 127.294333 35.967333 261.862388 
 127.294333 35.967445 262.160338 
 127.294444 35.967445 262.247234 
 127.294444 35.967556 262.426799 
 127.294444 35.967667 262.709046 
 127.294444 35.967778 263.092949 
 127.294556 35.967778 263.005030 
 127.294556 35.967889 263.271403 
 127.294556 35.968000 263.640103 
 127.294667 35.968000 263.597097 
 127.294667 35.968111 263.847429 
 127.294667 35.968222 264.200352 
 127.294778 35.968222 264.202447 
 127.294778 35.968333 264.436935 
 127.294778 35.968444 264.773910 
 127.294889 35.968444 264.820979 
 127.294889 35.968555 265.039797 
 127.294889 35.968667 265.360997 
 127.295000 35.968667 265.452987 
 127.295000 35.968778 265.655965 
 127.295000 35.968889 265.961218 
 127.295111 35.968889 266.097857 
 127.295111 35.969000 266.285577 
 127.295111 35.969111 266.574646 
 127.295111 35.969222 266.965999 
 127.295222 35.969222 266.927874 
 127.295222 35.969333 267.201024 
 127.295222 35.969444 267.576350 
 127.295333 35.969444 267.582876 
 127.295333 35.969555 267.840279 
 127.295333 35.969667 268.199750 
 127.295444 35.969667 268.250807 
 127.295444 35.969778 268.492794 
 127.295444 35.969889 268.835734 
 127.295556 35.969889 268.931108 
 127.295556 35.970000 269.157320 
 127.295556 35.970111 269.484430 
 127.295667 35.970111 269.624136 
 127.295667 35.970222 269.834400 
 127.295667 35.970333 270.145508 
 127.295778 35.970333 270.329191 
 127.295778 35.970444 270.523679 
 127.295778 35.970556 270.819549 
 127.295778 35.970667 271.215972 
 127.295889 35.970667 271.225302 
 127.295889 35.970778 271.505140 
 127.295889 35.970889 271.885474 
 127.296000 35.970889 271.938772 
 127.296000 35.971000 272.202747 
 127.296000 35.971111 272.567161 
 127.296111 35.971111 272.664370 
 127.296111 35.971222 272.912309 
 127.296111 35.971333 273.260630 
 127.296222 35.971333 273.401457 
 127.296222 35.971444 273.633529 
 127.296222 35.971556 273.966584 
 127.296333 35.971556 274.150732 
 127.296333 35.971667 274.366480 
 127.296333 35.971778 274.683410 
 127.296444 35.971778 274.910820 
 127.296444 35.971889 275.110724 
 127.296444 35.972000 275.411696 
 127.296444 35.972111 275.812637 
 127.296556 35.972111 275.866466 
 127.296556 35.972222 276.151307 
 127.296556 35.972333 276.536808 
 127.296667 35.972333 276.633506 
 127.296667 35.972444 276.902008 
 127.296667 35.972556 277.271457 
 127.296778 35.972556 277.411402 
 127.296778 35.972667 277.663795 
 127.296778 35.972778 278.017020 
 127.296889 35.972778 278.199843 
 127.296889 35.972889 278.436294 
 127.296889 35.973000 278.773460 
 127.297000 35.973000 278.999299 
 127.297000 35.973111 279.219634 
 127.297000 35.973222 279.540568 
 127.297111 35.973222 279.808916 
 127.297111 35.973333 280.013740 
 127.297111 35.973444 280.318170 
 127.297111 35.973556 280.723189 
 127.297222 35.973556 280.817970 
 127.297222 35.973667 281.106188 
 127.297222 35.973778 281.494877 
 127.297333 35.973778 281.632139 
 127.297333 35.973889 281.904311 
 127.297333 35.974000 282.276835 
 127.297444 35.974000 282.456638 
 127.297444 35.974111 282.713118 
 127.297444 35.974222 283.068776 
 127.297556 35.974222 283.290684 
 127.297556 35.974333 283.531081 
 127.297556 35.974444 283.870593 
 127.297667 35.974444 284.134796 
 127.297667 35.974556 284.358937 
 127.297667 35.974667 284.682130 
 127.297778 35.974778 285.196106 
 127.297778 35.974889 285.503757 
 127.297778 35.975000 285.910156 
 127.297889 35.975000 286.042897 
 127.297889 35.975111 286.334191 
 127.297889 35.975222 286.724168 
 127.298000 35.975222 286.898597 
 127.298000 35.975333 287.173698 
 127.298000 35.975444 287.547417 
 127.298111 35.975444 287.763645 
 127.298111 35.975556 288.022380 
 127.298111 35.975667 288.379666 
 127.298222 35.975667 288.637194 
 127.298222 35.975778 288.879726 
 127.298222 35.975889 289.221415 
 127.298333 35.975889 289.520114 
 127.298333 35.976000 289.745967 
 127.298333 35.976111 290.071185 
 127.298333 35.976222 290.494580 
 127.298444 35.976222 290.620459 
 127.298444 35.976333 290.929369 
 127.298444 35.976444 291.336389 
 127.298556 35.976444 291.503562 
 127.298556 35.976556 291.795990 
 127.298556 35.976667 292.187219 
 127.298667 35.976667 292.395236 
 127.298667 35.976778 292.670789 
 127.298667 35.976889 293.045435 
 127.298778 35.976889 293.294120 
 127.298778 35.977000 293.553377 
 127.298778 35.977111 293.911602 
 127.298889 35.977111 294.201177 
 127.298889 35.977222 294.443966 
 127.298889 35.977333 294.785597 
 127.299000 35.977333 295.115441 
 127.299000 35.977445 295.342398 
 127.299000 35.977556 295.667122 
 127.299000 35.977667 296.090658 
 127.299111 35.977667 296.248032 
 127.299111 35.977778 296.556179 
 127.299111 35.977889 296.963012 
 127.299222 35.977889 297.160610 
 127.299222 35.978000 297.452342 
 127.299222 35.978111 297.842633 
 127.299333 35.978111 298.080594 
 127.299333 35.978222 298.355739 
 127.299333 35.978333 298.729314 
 127.299444 35.978333 299.007095 
 127.299444 35.978445 299.266343 
 127.299444 35.978556 299.622835 
 127.299556 35.978556 299.940699 
 127.299556 35.978667 300.183320 
 127.299556 35.978778 300.523115 
 127.299667 35.978889 301.106547 
 127.299667 35.979000 301.429804 
 127.299667 35.979111 301.851200 
 127.299778 35.979111 302.036398 
 127.299778 35.979222 302.343558 
 127.299778 35.979333 302.747504 
 127.299889 35.979333 302.972067 
 127.299889 35.979445 303.262649 
 127.299889 35.979556 303.649945 
 127.300000 35.979556 303.914051 
 127.300000 35.979667 304.187885 
 127.300000 35.979778 304.558360 
 127.300111 35.979778 304.861419 
 127.300111 35.979889 305.118666 
 127.300111 35.980000 305.472479 
 127.300222 35.980000 305.814791 
 127.300222 35.980111 306.055279 
 127.300222 35.980222 306.392924 
 127.300222 35.980333 306.826820 
 127.300333 35.980333 306.997002 
 127.300333 35.980444 307.317946 
 127.300333 35.980555 307.735066 
 127.300444 35.980555 307.944245 
 127.300444 35.980667 308.248316 
 127.300444 35.980778 308.648490 
 127.300556 35.980778 308.896160 
 127.300556 35.980889 309.183520 
 127.300556 35.981000 309.567650 
 127.300667 35.981000 309.853660 
 127.300667 35.981111 310.123756 
 127.300667 35.981222 310.490900 
 127.300778 35.981222 310.814986 
 127.300778 35.981333 311.068389 
 127.300778 35.981444 311.418705 
 127.300889 35.981444 311.781196 
 127.300889 35.981555 312.017736 
 127.300889 35.981667 312.351057 
 127.300889 35.981778 312.780755 
 127.301000 35.981778 312.971503 
 127.301000 35.981889 313.287525 
 127.301000 35.982000 313.700281 
 127.301111 35.982000 313.929176 
 127.301111 35.982111 314.228221 
 127.301111 35.982222 314.623865 
 127.301222 35.982222 314.890368 
 127.301222 35.982333 315.172596 
 127.301222 35.982444 315.551287 
 127.301333 35.982444 315.855636 
 127.301333 35.982555 316.120878 
 127.301333 35.982667 316.482447 
 127.301444 35.982667 316.823985 
 127.301444 35.982778 317.072910 
 127.301444 35.982889 317.417007 
 127.301444 35.983000 317.857381 
 127.301556 35.983000 318.027989 
 127.301556 35.983111 318.354985 
 127.301556 35.983222 318.778121 
 127.301667 35.983222 318.985870 
 127.301667 35.983333 319.295924 
 127.301667 35.983444 319.701981 
 127.301778 35.983444 319.947015 
 127.301778 35.983556 320.240546 
 127.301778 35.983667 320.628771 
 127.301889 35.983667 320.910525 
 127.301889 35.983778 321.187076 
 127.301889 35.983889 321.558242 
 127.302000 35.983889 321.876975 
 127.302000 35.984000 322.136381 
 127.302000 35.984111 322.490322 
 127.302111 35.984222 323.087772 
 127.302111 35.984333 323.424647 
 127.302111 35.984444 323.857057 
 127.302222 35.984444 324.041616 
 127.302222 35.984556 324.361891 
 127.302222 35.984667 324.776298 
 127.302333 35.984667 324.997110 
 127.302333 35.984778 325.300282 
 127.302333 35.984889 325.697507 
 127.302444 35.984889 325.954734 
 127.302444 35.985000 326.240639 
 127.302444 35.985111 326.620516 
 127.302556 35.985111 326.913573 
 127.302556 35.985222 327.182370 
 127.302556 35.985333 327.545763 
 127.302667 35.985333 327.874572 
 127.302667 35.985444 328.125746 
 127.302667 35.985556 328.471755 
 127.302667 35.985667 328.911331 
 127.302778 35.985667 329.070061 
 127.302778 35.985778 329.398847 
 127.302778 35.985889 329.821117 
 127.302889 35.985889 330.015701 
 127.302889 35.986000 330.327099 
 127.302889 35.986111 330.732677 
 127.303000 35.986111 330.962274 
 127.303000 35.986222 331.256018 
 127.303000 35.986333 331.644256 
 127.303111 35.986333 331.909396 
 127.303111 35.986444 332.185779 
 127.303111 35.986556 332.556513 
 127.303222 35.986556 332.856597 
 127.303222 35.986667 333.115778 
 127.303222 35.986778 333.469168 
 127.303222 35.986889 333.915470 
 127.303333 35.986889 334.046300 
 127.303333 35.987000 334.382184 
 127.303333 35.987111 334.811715 
 127.303444 35.987111 334.977100 
 127.303444 35.987222 335.295170 
 127.303444 35.987333 335.707242 
 127.303556 35.987333 335.907609 
 127.303556 35.987444 336.208201 
 127.303556 35.987556 336.602652 
 127.303667 35.987556 336.837504 
 127.303667 35.987667 337.120778 
 127.303667 35.987778 337.497767 
 127.303778 35.987778 337.767290 
 127.303778 35.987889 338.033623 
 127.303778 35.988000 338.392452 
 127.303889 35.988000 338.696040 
 127.303889 35.988111 338.945025 
 127.303889 35.988222 339.286421 
 127.303889 35.988333 339.721320 
 127.304000 35.988333 339.855844 
 127.304000 35.988444 340.179649 
 127.304000 35.988556 340.596811 
 127.304111 35.988556 340.765673 
 127.304111 35.988667 341.072494 
 127.304111 35.988778 341.471314 
 127.304222 35.988778 341.673999 
 127.304222 35.988889 341.963359 
 127.304222 35.989000 342.344633 
 127.304333 35.989000 342.581277 
 127.304333 35.989111 342.853018 
 127.304333 35.989222 343.216589 
 127.304444 35.989222 343.486638 
 127.304444 35.989333 343.740921 
 127.304444 35.989444 344.086948 
 127.304444 35.989556 344.525825 
 127.304556 35.989556 344.627311 
 127.304556 35.989667 344.956283 
 127.304556 35.989778 345.376668 
 127.304667 35.989778 345.511535 
 127.304667 35.989889 345.822936 
 127.304667 35.990000 346.225666 
 127.304778 35.990000 346.393942 
 127.304778 35.990111 346.687618 
 127.304778 35.990222 347.072536 
 127.304889 35.990222 347.273777 
 127.304889 35.990333 347.549887 
 127.304889 35.990445 347.917866 
 127.305000 35.990445 348.151859 
 127.305000 35.990556 348.409885 
 127.305000 35.990667 348.760027 
 127.305000 35.990778 349.200995 
 127.305111 35.990778 349.267068 
 127.305111 35.990889 349.599535 
 127.305111 35.991000 350.022741 
 127.305222 35.991000 350.121682 
 127.305222 35.991111 350.436319 
 127.305222 35.991222 350.841611 
 127.305333 35.991222 350.973084 
 127.305333 35.991333 351.270054 
 127.305333 35.991445 351.658336 
 127.305444 35.991445 351.822025 
 127.305444 35.991556 352.100773 
 127.305444 35.991667 352.471117 
 127.305556 35.991667 352.666928 
 127.305556 35.991778 352.928049 
 127.305556 35.991889 353.280616 
 127.305667 35.991889 353.508678 
 127.305667 35.992000 353.752019 
 127.305667 35.992111 354.086659 
 127.305667 35.992222 354.512169 
 127.305778 35.992222 354.572625 
 127.305778 35.992333 354.889033 
 127.305778 35.992445 355.296658 
 127.305889 35.992445 355.389142 
 127.305889 35.992556 355.687665 
 127.305889 35.992667 356.077255 
 127.306000 35.992667 356.201445 
 127.306000 35.992778 356.482244 
 127.306000 35.992889 356.853963 
 127.306111 35.992889 357.009875 
 127.306111 35.993000 357.273332 
 127.306111 35.993111 357.626499 
 127.306222 35.993111 357.813712 
 127.306222 35.993222 358.059429 
 127.306222 35.993333 358.394768 
 127.306222 35.993444 358.820792 
 127.306333 35.993444 358.841227 
 127.306333 35.993555 359.158590 
 127.306333 35.993667 359.566487 
 127.306444 35.993667 359.618223 
 127.306444 35.993778 359.917772 
 127.306444 35.993889 360.307706 
 127.306556 35.993889 360.390646 
 127.306556 35.994000 360.672798 
 127.306556 35.994111 361.044060 
 127.306667 35.994111 361.157900 
 127.306667 35.994222 361.422225 
 127.306667 35.994333 361.775571 
 127.306778 35.994333 361.920314 
 127.306778 35.994444 362.166667 
 127.306778 35.994555 362.501952 
 127.306778 35.994667 362.927234 
 127.306889 35.994667 362.905742 
 127.306889 35.994778 363.223752 
 127.306889 35.994889 363.630363 
 127.307000 35.994889 363.639569 
 127.307000 35.995000 363.939507 
 127.307000 35.995111 364.327956 
 127.307111 35.995111 364.367673 
 127.307111 35.995222 364.649704 
 127.307111 35.995333 365.020154 
 127.307222 35.995333 365.090273 
 127.307222 35.995444 365.354252 
 127.307222 35.995556 365.707245 
 127.307333 35.995556 365.807147 
 127.307333 35.995667 366.052894 
 127.307333 35.995778 366.387880 
 127.307444 35.995778 366.517886 
 127.307444 35.995889 366.745637 
 127.307444 35.996000 367.062474 
 127.307444 35.996111 367.467219 
 127.307556 35.996111 367.432129 
 127.307556 35.996222 367.730983 
 127.307556 35.996333 368.117655 
 127.307667 35.996333 368.112477 
 127.307667 35.996444 368.393208 
 127.307667 35.996556 368.762375 
 127.307778 35.996556 368.786614 
 127.307778 35.996667 369.049011 
 127.307778 35.996778 369.400099 
 127.307889 35.996778 369.453958 
 127.307889 35.996889 369.698290 
 127.307889 35.997000 370.031160 
 127.308000 35.997000 370.114386 
 127.308000 35.997111 370.340818 
 127.308000 35.997222 370.655636 
 127.308000 35.997333 371.058434 
 127.308111 35.997333 370.977022 
 127.308111 35.997444 371.273216 
 127.308111 35.997556 371.657702 
 127.308222 35.997556 371.605688 
 127.308222 35.997667 371.883890 
 127.308222 35.997778 372.250231 
 127.308333 35.997778 372.227366 
 127.308333 35.997889 372.487440 
 127.308333 35.998000 372.835500 
 127.308444 35.998000 372.841655 
 127.308444 35.998111 373.083769 
 127.308444 35.998222 373.413714 
 127.308556 35.998222 373.448734 
 127.308556 35.998333 373.673213 
 127.308556 35.998444 373.984449 
 127.308556 35.998556 374.383421 
 127.308667 35.998556 374.254635 
 127.308667 35.998667 374.547821 
 127.308667 35.998778 374.928589 
 127.308778 35.998778 374.828496 
 127.308778 35.998889 375.103499 
 127.308778 35.999000 375.465930 
 127.308889 35.999000 375.394526 
 127.308889 35.999111 375.652030 
 127.308889 35.999222 375.995775 
 127.309000 35.999222 375.952785 
 127.309000 35.999333 376.192112 
 127.309000 35.999444 376.517587 
 127.309111 35.999444 376.502918 
 127.309111 35.999556 376.724235 
 127.309111 35.999667 377.031609 
 127.309111 35.999778 377.426004 
 127.309222 35.999778 377.248255 
 127.309222 35.999889 377.537970 
 127.309222 36.000000 377.913407 
 127.309333 36.000000 377.764030 
 127.309333 36.000111 378.035651 
 127.309333 36.000222 378.392903 
 127.309444 36.000222 378.271506 
 127.309444 36.000333 378.524905 
 127.309444 36.000444 378.863842 
 127.309556 36.000444 378.770545 
 127.309556 36.000556 379.005742 
 127.309556 36.000667 379.326386 
 127.309667 36.000667 379.260922 
 127.309667 36.000778 379.478088 
 127.309667 36.000889 379.781203 
 127.309667 36.001000 380.169431 
 127.309778 36.001000 379.941728 
 127.309778 36.001111 380.226561 
 127.309778 36.001222 380.596415 
 127.309889 36.001222 380.396608 
 127.309889 36.001333 380.663331 
 127.309889 36.001444 381.014982 
 127.310000 36.001444 380.842604 
 127.310000 36.001556 381.091091 
 127.310000 36.001667 381.425060 
 127.310111 36.001667 381.279904 
 127.310111 36.001778 381.510004 
 127.310111 36.001889 381.825785 
 127.310222 36.001889 381.707795 
 127.310222 36.002000 381.919737 
 127.310222 36.002111 382.217205 
 127.310222 36.002222 382.599083 
 127.310333 36.002222 382.320371 
 127.310333 36.002333 382.599699 
 127.310333 36.002444 382.963344 
 127.310444 36.002444 382.711663 
 127.310444 36.002556 382.972728 
 127.310444 36.002667 383.318684 
 127.310556 36.002667 383.093957 
 127.310556 36.002778 383.336587 
 127.310556 36.002889 383.664329 
 127.310667 36.002889 383.466377 
 127.310667 36.003000 383.690827 
 127.310667 36.003111 384.000233 
 127.310778 36.003111 383.829219 
 127.310778 36.003222 384.035662 
 127.310778 36.003333 384.326906 
 127.310778 36.003445 384.702573 
 127.310889 36.003445 384.371127 
 127.310889 36.003556 384.643692 
 127.310889 36.003667 385.000952 
 127.311000 36.003667 384.696531 
 127.311000 36.003778 384.951020 
 127.311000 36.003889 385.290048 
 127.311111 36.003889 385.012029 
 127.311111 36.004000 385.248322 
 127.311111 36.004111 385.569000 
 127.311222 36.004111 385.317675 
 127.311222 36.004222 385.536396 
 127.311222 36.004333 385.838450 
 127.311333 36.004333 385.613282 
 127.311333 36.004445 385.813834 
 127.311333 36.004556 386.097627 
 127.311333 36.004667 386.465540 
 127.311444 36.004667 386.081385 
 127.311444 36.004778 386.347091 
 127.311444 36.004889 386.696763 
 127.311556 36.004889 386.338655 
 127.311556 36.005000 386.586160 
 127.311556 36.005111 386.917474 
 127.311667 36.005111 386.585835 
 127.311667 36.005222 386.815781 
 127.311667 36.005333 387.128448 
 127.311778 36.005333 386.822618 
 127.311778 36.005444 387.034393 
 127.311778 36.005555 387.328796 
 127.311889 36.005555 387.049117 
 127.311889 36.005667 387.242898 
 127.311889 36.005778 387.519214 
 127.311889 36.005889 387.878918 
 127.312000 36.005889 387.440784 
 127.312000 36.006000 387.699416 
 127.312000 36.006111 388.040249 
 127.312111 36.006111 387.628377 
 127.312111 36.006222 387.868956 
 127.312111 36.006333 388.191642 
 127.312222 36.006333 387.805251 
 127.312222 36.006444 388.027665 
 127.312222 36.006555 388.332094 
 127.312333 36.006555 387.971655 
 127.312333 36.006667 388.176083 
 127.312333 36.006778 388.462996 
 127.312444 36.006778 388.127496 
 127.312444 36.006889 388.313579 
 127.312444 36.007000 388.582272 
 127.312444 36.007111 388.932554 
 127.312556 36.007111 388.440616 
 127.312556 36.007222 388.691267 
 127.312556 36.007333 389.023414 
 127.312667 36.007333 388.556647 
 127.312667 36.007444 388.789149 
 127.312667 36.007555 389.103053 
 127.312778 36.007555 388.662060 
 127.312778 36.007667 388.876591 
 127.312778 36.007778 389.173011 
 127.312889 36.007778 388.756658 
 127.312889 36.007889 388.952846 
 127.312889 36.008000 389.231065 
 127.313000 36.008000 388.840188 
 127.313000 36.008111 389.018511 
 127.313000 36.008222 389.278708 
 127.313000 36.008333 389.619790 
 127.313111 36.008333 389.072920 
 127.313111 36.008444 389.314992 
 127.313111 36.008556 389.638481 
 127.313222 36.008556 389.116914 
 127.313222 36.008667 389.340725 
 127.313222 36.008778 389.646143 
 127.313333 36.008778 389.149246 
 127.313333 36.008889 389.355040 
 127.313333 36.009000 389.642285 
 127.313444 36.009000 389.170715 
 127.313444 36.009111 389.358672 
 127.313444 36.009222 389.627924 
 127.313556 36.009222 389.180816 
 127.313556 36.009333 389.350836 
 127.313556 36.009444 389.601995 
 127.313556 36.009556 389.933973 
 127.313667 36.009556 389.332523 
 127.313667 36.009667 389.565439 
 127.313667 36.009778 389.879380 
 127.313778 36.009778 389.302339 
 127.313778 36.009889 389.517274 
 127.313778 36.010000 389.813078 
 127.313889 36.010000 389.261231 
 127.313889 36.010111 389.458366 
 127.313889 36.010222 389.736217 
 127.314000 36.010222 389.208578 
 127.314000 36.010333 389.388195 
 127.314000 36.010444 389.647615 
 127.314111 36.010444 389.144895 
 127.314111 36.010556 389.306766 
 127.314111 36.010667 389.548347 
 127.314111 36.010778 389.870373 
 127.314222 36.010778 389.213671 
 127.314222 36.010889 389.437316 
 127.314222 36.011000 389.741250 
 127.314333 36.011000 389.109629 
 127.314333 36.011111 389.315945 
 127.314333 36.011222 389.601548 
 127.314444 36.011222 388.993902 
 127.314444 36.011333 389.182340 
 127.314444 36.011444 389.449971 
 127.314556 36.011444 388.867140 
 127.314556 36.011556 389.037884 
 127.314556 36.011667 389.287726 
 127.314667 36.011667 388.728684 
 127.314667 36.011778 388.881639 
 127.314667 36.011889 389.113601 
 127.314667 36.012000 389.425269 
 127.314778 36.012000 388.714464 
 127.314778 36.012111 388.929164 
 127.314778 36.012222 389.222543 
 127.314889 36.012222 388.535500 
 127.314889 36.012333 388.732380 
 127.314889 36.012444 389.007845 
 127.315000 36.012444 388.345160 
 127.315000 36.012556 388.524268 
 127.315000 36.012667 388.781866 
 127.315111 36.012667 388.143785 
 127.315111 36.012778 388.305305 
 127.315111 36.012889 388.545703 
 127.315222 36.012889 387.930815 
 127.315222 36.013000 388.074479 
 127.315222 36.013111 388.297075 
 127.315333 36.013111 387.706541 
 127.315333 36.013222 387.832744 
 127.315333 36.013333 388.037724 
 127.315333 36.013444 388.320681 
 127.315444 36.013444 387.579166 
 127.315444 36.013556 387.766443 
 127.315444 36.013667 388.032126 
 127.315556 36.013667 387.314854 
 127.315556 36.013778 387.484390 
 127.315556 36.013889 387.732431 
 127.315667 36.013889 387.038474 
 127.315667 36.014000 387.190436 
 127.315667 36.014111 387.420750 
 127.315778 36.014111 386.751095 
 127.315778 36.014222 386.885669 
 127.315778 36.014333 387.098442 
 127.315889 36.014333 386.451938 
 127.315889 36.014444 386.569041 
 127.315889 36.014556 386.764188 
 127.315889 36.014667 387.037147 
 127.316000 36.014667 386.241806 
 127.316000 36.014778 386.419276 
 127.316000 36.014889 386.674672 
 127.316111 36.014889 385.902486 
 127.316111 36.015000 386.062464 
 127.316111 36.015111 386.300215 
 127.316222 36.015111 385.552297 
 127.316222 36.015222 385.694971 
 127.316222 36.015333 385.915264 
 127.316333 36.015333 385.190346 
 127.316333 36.015445 385.315917 
 127.316333 36.015556 385.518388 
 127.316444 36.015556 384.817510 
 127.316444 36.015667 384.925854 
 127.316444 36.015778 385.111004 
 127.316444 36.015889 385.373501 
 127.316556 36.015889 384.524009 
 127.316556 36.016000 384.691759 
 127.316556 36.016111 384.936700 
 127.316667 36.016111 384.111463 
 127.316667 36.016222 384.262000 
 127.316667 36.016333 384.489576 
 127.316778 36.016333 383.687206 
 127.316778 36.016445 383.820746 
 127.316778 36.016556 384.030583 
 127.316889 36.016556 383.252248 
 127.316889 36.016667 383.368657 
 127.316889 36.016778 383.561268 
 127.317000 36.016778 382.805658 
 127.317000 36.016889 382.904858 
 127.317000 36.017000 383.080167 
 127.317000 36.017111 383.332090 
 127.317111 36.017111 382.430559 
 127.317111 36.017222 382.589093 
 127.317111 36.017333 382.823413 
 127.317222 36.017333 381.944638 
 127.317222 36.017445 382.085954 
 127.317222 36.017556 382.302963 
 127.317333 36.017556 381.448235 
 127.317333 36.017667 381.572524 
 127.317333 36.017778 381.772412 
 127.317444 36.017778 380.940305 
 127.317444 36.017889 381.047492 
 127.317444 36.018000 381.230565 
 127.317556 36.018000 380.422011 
 127.317556 36.018111 380.512197 
 127.317556 36.018222 380.678236 
 127.317667 36.018333 379.965406 
 127.317667 36.018444 380.114338 
 127.317667 36.018555 380.338362 
 127.317778 36.018555 379.408386 
 127.317778 36.018667 379.540404 
 127.317778 36.018778 379.747419 
 127.317889 36.018778 378.839982 
 127.317889 36.018889 378.955013 
 127.317889 36.019000 379.145341 
 127.318000 36.019000 378.261498 
 127.318000 36.019111 378.359631 
 127.318000 36.019222 378.533041 
 127.318111 36.019222 377.671615 
 127.318111 36.019333 377.752913 
 127.318111 36.019444 377.909336 
 127.318222 36.019444 377.071601 
 127.318222 36.019555 377.136255 
 127.318222 36.019667 377.275884 
 127.318222 36.019778 377.490345 
 127.318333 36.019778 376.508537 
 127.318333 36.019889 376.631157 
 127.318333 36.020000 376.828633 
 127.318444 36.020000 375.870764 
 127.318444 36.020111 375.976743 
 127.318444 36.020222 376.157427 
 127.318556 36.020222 375.221920 
 127.318556 36.020333 375.311191 
 127.318556 36.020444 375.475016 
 127.318667 36.020444 374.563265 
 127.318667 36.020555 374.636021 
 127.318667 36.020667 374.783180 
 127.318778 36.020667 373.893682 
 127.318778 36.020778 373.950018 
 127.318778 36.020889 374.080286 
 127.318778 36.021000 374.284838 
 127.318889 36.021000 373.254285 
 127.318889 36.021111 373.368044 
 127.318889 36.021222 373.555937 
 127.319000 36.021222 372.547710 
 127.319000 36.021333 372.644897 
 127.319000 36.021444 372.816067 
 127.319111 36.021444 371.831679 
 127.319111 36.021556 371.912689 
 127.319111 36.021667 372.067127 
 127.319222 36.021667 371.104966 
 127.319222 36.021778 371.169506 
 127.319222 36.021889 371.307382 
 127.319333 36.021889 370.368888 
 127.319333 36.022000 370.417152 
 127.319333 36.022111 370.538659 
 127.319444 36.022222 369.654222 
 127.319444 36.022333 369.759544 
 127.319444 36.022444 369.937793 
 127.319556 36.022444 368.882222 
 127.319556 36.022556 368.971281 
 127.319556 36.022667 369.133174 
 127.319667 36.022667 368.099822 
 127.319667 36.022778 368.172557 
 127.319667 36.022889 368.318035 
 127.319778 36.022889 367.308458 
 127.319778 36.023000 367.365066 
 127.319778 36.023111 367.494323 
 127.319889 36.023111 366.506877 
 127.319889 36.023222 366.547299 
 127.319889 36.023333 366.660534 
 127.320000 36.023333 365.696428 
 127.320000 36.023444 365.720879 
 127.320000 36.023556 365.818004 
 127.320000 36.023667 365.987370 
 127.320111 36.023667 364.884375 
 127.320111 36.023778 364.965331 
 127.320111 36.023889 365.118437 
 127.320222 36.023889 364.039343 
 127.320222 36.024000 364.104326 
 127.320222 36.024111 364.241665 
 127.320333 36.024111 363.184445 
 127.320333 36.024222 363.233378 
 127.320333 36.024333 363.354570 
 127.320444 36.024333 362.320425 
 127.320444 36.024444 362.353428 
 127.320444 36.024556 362.458542 
 127.320556 36.024556 361.448075 
 127.320556 36.024667 361.465344 
 127.320556 36.024778 361.554578 
 127.320556 36.024889 361.715711 
 127.320667 36.024889 360.567695 
 127.320667 36.025000 360.640930 
 127.320667 36.025111 360.786009 
 127.320778 36.025111 359.661964 
 127.320778 36.025222 359.719488 
 127.320778 36.025333 359.848710 
 127.320889 36.025333 358.746819 
 127.320889 36.025444 358.788581 
 127.320889 36.025556 358.901894 
 127.321000 36.025556 357.823834 
 127.321000 36.025667 357.850030 
 127.321000 36.025778 357.947631 
 127.321111 36.025778 356.891659 
 127.321111 36.025889 356.902318 
 127.321111 36.026000 356.984077 
 127.321222 36.026000 355.951800 
 127.321222 36.026111 355.947013 
 127.321222 36.026222 356.013233 
 127.321222 36.026333 356.150594 
 127.321333 36.026333 354.982700 
 127.321333 36.026444 355.033332 
 127.321333 36.026556 355.154959 
 127.321444 36.026556 354.011064 
 127.321444 36.026667 354.046427 
 127.321444 36.026778 354.152397 
 127.321556 36.026778 353.030660 
 127.321556 36.026889 353.050557 
 127.321556 36.027000 353.140970 
 127.321667 36.027000 352.043104 
 127.321667 36.027111 352.047734 
 127.321667 36.027222 352.122787 
 127.321778 36.027222 351.047026 
 127.321778 36.027333 351.036341 
 127.321778 36.027444 351.095988 
 127.321889 36.027444 350.043975 
 127.321889 36.027556 350.018173 
 127.321889 36.027667 350.062748 
 127.321889 36.027778 350.177346 
 127.322000 36.027778 348.991690 
 127.322000 36.027889 349.020984 
 127.322000 36.028000 349.120211 
 127.322111 36.028000 347.958617 
 127.322111 36.028111 347.972830 
 127.322111 36.028222 348.056883 
 127.322222 36.028222 346.917489 
 127.322222 36.028333 346.916576 
 127.322222 36.028445 346.985590 
 127.322333 36.028445 345.869878 
 127.322333 36.028556 345.854124 
 127.322333 36.028667 345.908094 
 127.322444 36.028667 344.814541 
 127.322444 36.028778 344.783842 
 127.322444 36.028889 344.822724 
 127.322556 36.028889 343.753007 
 127.322556 36.029000 343.707562 
 127.322556 36.029111 343.731554 
 127.322556 36.029222 343.825028 
 127.322667 36.029222 342.623682 
 127.322667 36.029333 342.632788 
 127.322667 36.029445 342.711214 
 127.322778 36.029445 341.534030 
 127.322778 36.029556 341.528430 
 127.322778 36.029667 341.592007 
 127.322889 36.029667 340.437104 
 127.322889 36.029778 340.416757 
 127.322889 36.029889 340.465446 
 127.323000 36.029889 339.334601 
 127.323000 36.030000 339.299706 
 127.323000 36.030111 339.333706 
 127.323111 36.030111 338.225113 
 127.323111 36.030222 338.175604 
 127.323111 36.030333 338.194902 
 127.323222 36.030333 337.110267 
 127.323222 36.030444 337.046346 
 127.323222 36.030555 337.051140 
 127.323222 36.030667 337.124570 
 127.323333 36.030667 335.910360 
 127.323333 36.030778 335.900612 
 127.323333 36.030889 335.959360 
 127.323444 36.030889 334.769443 
 127.323444 36.031000 334.745370 
 127.323444 36.031111 334.789618 
 127.323556 36.031111 333.622101 
 127.323556 36.031222 333.583624 
 127.323556 36.031333 333.613378 
 127.323667 36.031333 332.470062 
 127.323667 36.031444 332.417382 
 127.323667 36.031555 332.432841 
 127.323778 36.031555 331.311907 
 127.323778 36.031667 331.244987 
 127.323778 36.031778 331.246177 
 127.323889 36.031778 330.149099 
 127.323889 36.031889 330.068337 
 127.323889 36.032000 330.055373 
 127.323889 36.032111 330.110157 
 127.324000 36.032111 328.885852 
 127.324000 36.032222 328.858699 
 127.324000 36.032333 328.899204 
 127.324111 36.032333 327.699359 
 127.324111 36.032444 327.658217 
 127.324111 36.032555 327.684645 
 127.324222 36.032555 326.507354 
 127.324222 36.032667 326.452191 
 127.324222 36.032778 326.464586 
 127.324333 36.032778 325.311419 
 127.324333 36.032889 325.242611 
 127.324333 36.033000 325.241071 
 127.324444 36.033000 324.110454 
 127.324444 36.033111 324.027818 
 127.324444 36.033222 324.012310 
 127.324556 36.033333 322.809731 
 127.324556 36.033444 322.780458 
 127.324556 36.033556 322.818307 
 127.324667 36.033556 321.586637 
 127.324667 36.033667 321.543698 
 127.324667 36.033778 321.567637 
 127.324778 36.033778 320.360625 
 127.324778 36.033889 320.304114 
 127.324778 36.034000 320.314344 
 127.324889 36.034000 319.130081 
 127.324889 36.034111 319.059968 
 127.324889 36.034222 319.056460 
 127.325000 36.034222 317.896786 
 127.325000 36.034333 317.813271 
 127.325000 36.034444 317.796226 
 127.325111 36.034444 316.659308 
 127.325111 36.034556 316.562254 
 127.325111 36.034667 316.531753 
 127.325111 36.034778 316.567606 
 127.325222 36.034778 315.309054 
 127.325222 36.034889 315.265212 
 127.325222 36.035000 315.287588 
 127.325333 36.035000 314.052001 
 127.325333 36.035111 313.994790 
 127.325333 36.035222 314.003663 
 127.325444 36.035222 312.792966 
 127.325444 36.035333 312.722524 
 127.325444 36.035444 312.718159 
 127.325556 36.035444 311.530442 
 127.325556 36.035556 311.446783 
 127.325556 36.035667 311.429114 
 127.325667 36.035667 310.266229 
 127.325667 36.035778 310.169556 
 127.325667 36.035889 310.138784 
 127.325778 36.035889 308.998898 
 127.325778 36.036000 308.889186 
 127.325778 36.036111 308.845267 
 127.325778 36.036222 308.866954 
 127.325889 36.036222 307.606765 
 127.325889 36.036333 307.549784 
 127.325889 36.036444 307.558321 
 127.326000 36.036444 306.323309 
 127.326000 36.036556 306.253468 
 127.326000 36.036667 306.249058 
 127.326111 36.036667 305.037280 
 127.326111 36.036778 304.954557 
 127.326111 36.036889 304.937175 
 127.326222 36.036889 303.750527 
 127.326222 36.037000 303.655124 
 127.326222 36.037111 303.624977 
 127.326333 36.037111 302.461348 
 127.326333 36.037222 302.353484 
 127.326333 36.037333 302.310525 
 127.326333 36.037444 302.332527 
 127.326444 36.037444 301.051639 
 127.326444 36.037556 300.996069 
 127.326444 36.037667 301.005373 
 127.326556 36.037667 299.747983 
 127.326556 36.037778 299.679782 
 127.326556 36.037889 299.676417 
 127.326667 36.037889 298.444251 
 127.326667 36.038000 298.363816 
 127.326667 36.038111 298.347913 
 127.326778 36.038111 297.139284 
 127.326778 36.038222 297.046422 
 127.326778 36.038333 297.017962 
 127.326889 36.038333 295.834766 
 127.326889 36.038444 295.729679 
 127.326889 36.038556 295.688865 
 127.327000 36.038556 294.529248 
 127.327000 36.038667 294.411919 
 127.327000 36.038778 294.358731 
 127.327000 36.038889 294.369852 
 127.327111 36.038889 293.094979 
 127.327111 36.039000 293.029789 
 127.327111 36.039111 293.028631 
 127.327222 36.039111 291.777584 
 127.327222 36.039222 291.700228 
 127.327222 36.039333 291.686775 
 127.327333 36.039333 290.461521 
 127.327333 36.039444 290.372202 
 127.327333 36.039556 290.346657 
 127.327444 36.039556 289.145281 
 127.327444 36.039667 289.043863 
 127.327444 36.039778 289.006330 
 127.327556 36.039778 287.830723 
 127.327556 36.039889 287.717508 
 127.327556 36.040000 287.668091 
 127.327556 36.040111 287.682212 
 127.327667 36.040111 286.391391 
 127.327667 36.040222 286.330076 
 127.327667 36.040333 286.332171 
 127.327778 36.040333 285.067517 
 127.327778 36.040445 284.994435 
 127.327778 36.040556 284.984779 
 127.327889 36.040556 283.744320 
 127.327889 36.040667 283.659509 
 127.327889 36.040778 283.638037 
 127.328000 36.040778 282.423730 
 127.328000 36.040889 282.327393 
 127.328000 36.041000 282.294309 
 127.328111 36.041000 281.104261 
 127.328111 36.041111 280.996387 
 127.328111 36.041222 280.951679 
 127.328111 36.041333 280.969895 
 127.328222 36.041333 279.668562 
 127.328222 36.041445 279.612391 
 127.328222 36.041556 279.619104 
 127.328333 36.041556 278.342301 
 127.328333 36.041667 278.274679 
 127.328333 36.041778 278.269855 
 127.328444 36.041778 277.019599 
 127.328444 36.041889 276.940730 
 127.328444 36.042000 276.924574 
 127.328556 36.042000 275.698923 
 127.328556 36.042111 275.608797 
 127.328556 36.042222 275.581304 
 127.328667 36.042222 274.381963 
 127.328667 36.042333 274.281012 
 127.328667 36.042445 274.242362 
 127.328778 36.042556 272.955712 
 127.328778 36.042667 272.905895 
 127.328778 36.042778 272.918339 
 127.328889 36.042778 271.634954 
 127.328889 36.042889 271.574176 
 127.328889 36.043000 271.575629 
 127.329000 36.043000 270.316979 
 127.329000 36.043111 270.245410 
 127.329000 36.043222 270.235790 
 127.329111 36.043222 269.004106 
 127.329111 36.043333 268.921790 
 127.329111 36.043444 268.901304 
 127.329222 36.043444 267.694677 
 127.329222 36.043555 267.601610 
 127.329222 36.043667 267.570250 
 127.329333 36.043667 266.390599 
 127.329333 36.043778 266.286985 
 127.329333 36.043889 266.244956 
 127.329333 36.044000 266.264658 
 127.329444 36.044000 264.976148 
 127.329444 36.044111 264.923590 
 127.329444 36.044222 264.932516 
 127.329556 36.044222 263.671407 
 127.329556 36.044333 263.608399 
 127.329556 36.044444 263.606755 
 127.329667 36.044444 262.371098 
 127.329667 36.044555 262.297638 
 127.329667 36.044667 262.285421 
 127.329778 36.044667 261.077184 
 127.329778 36.044778 260.993384 
 127.329778 36.044889 260.970891 
 127.329889 36.044889 259.788211 
 127.329889 36.045000 259.694143 
 127.329889 36.045111 259.661299 
 127.329889 36.045222 259.689478 
 127.330000 36.045222 258.401933 
 127.330000 36.045333 258.358943 
 127.330000 36.045444 258.376858 
 127.330111 36.045444 257.115180 
 127.330111 36.045555 257.062044 
 127.330111 36.045667 257.069694 
 127.330222 36.045667 255.835897 
 127.330222 36.045778 255.772764 
 127.330222 36.045889 255.770412 
 127.330333 36.045889 254.562597 
 127.330333 36.046000 254.489507 
 127.330333 36.046111 254.477115 
 127.330444 36.046111 253.297215 
 127.330444 36.046222 253.214374 
 127.330444 36.046333 253.192149 
 127.330556 36.046444 251.945761 
 127.330556 36.046556 251.913702 
 127.330556 36.046667 251.941986 
 127.330667 36.046667 250.685728 
 127.330667 36.046778 250.644027 
 127.330667 36.046889 250.662587 
 127.330778 36.046889 249.432760 
 127.330778 36.047000 249.381421 
 127.330778 36.047111 249.390262 
 127.330889 36.047111 248.188837 
 127.330889 36.047222 248.128067 
 127.330889 36.047333 248.127445 
 127.331000 36.047333 246.952360 
 127.331000 36.047444 246.882336 
 127.331000 36.047556 246.872190 
 127.331111 36.047556 245.725556 
 127.331111 36.047667 245.646330 
 127.331111 36.047778 245.626868 
 127.331111 36.047889 245.667151 
 127.331222 36.047889 244.418512 
 127.331222 36.048000 244.389739 
 127.331222 36.048111 244.420632 
 127.331333 36.048111 243.200056 
 127.331333 36.048222 243.162081 
 127.331333 36.048333 243.183779 
 127.331444 36.048333 241.991919 
 127.331444 36.048444 241.945083 
 127.331444 36.048556 241.957690 
 127.331556 36.048556 240.792951 
 127.331556 36.048667 240.737144 
 127.331556 36.048778 240.740670 
 127.331667 36.048778 239.604930 
 127.331667 36.048889 239.540362 
 127.331667 36.049000 239.535015 
 127.331667 36.049111 239.588968 
 127.331778 36.049111 238.353154 
 127.331778 36.049222 238.339020 
 127.331778 36.049333 238.384014 
 127.331889 36.049333 237.177669 
 127.331889 36.049444 237.154897 
 127.331889 36.049556 237.191143 
 127.332000 36.049556 236.012433 
 127.332000 36.049667 235.981033 
 127.332000 36.049778 236.008543 
 127.332111 36.049778 234.859375 
 127.332111 36.049889 234.819558 
 127.332111 36.050000 234.838542 
 127.332222 36.050000 233.717174 
 127.332222 36.050111 233.668921 
 127.332222 36.050222 233.679423 
 127.332333 36.050222 232.587678 
 127.332333 36.050333 232.531216 
 127.332333 36.050444 232.533431 
 127.332333 36.050556 232.594247 
 127.332444 36.050556 231.405003 
 127.332444 36.050667 231.398944 
 127.332444 36.050778 231.451379 
 127.332556 36.050778 230.292241 
 127.332556 36.050889 230.278145 
 127.332556 36.051000 230.322385 
 127.332667 36.051000 229.191602 
 127.332667 36.051111 229.169446 
 127.332667 36.051222 229.205547 
 127.332778 36.051222 228.104961 
 127.332778 36.051333 228.074956 
 127.332778 36.051444 228.103131 
 127.332889 36.051444 227.031086 
 127.332889 36.051556 226.993251 
 127.332889 36.051667 227.013601 
 127.332889 36.051778 227.091869 
 127.333000 36.051778 225.926313 
 127.333000 36.051889 225.938953 
 127.333000 36.052000 226.009433 
 127.333111 36.052000 224.872815 
 127.333111 36.052111 224.877764 
 127.333111 36.052222 224.940477 
 127.333222 36.052222 223.834654 
 127.333222 36.052333 223.832126 
 127.333222 36.052444 223.887284 
 127.333333 36.052444 222.810601 
 127.333333 36.052556 222.800616 
 127.333333 36.052667 222.848372 
 127.333444 36.052667 221.802386 
 127.333444 36.052778 221.785238 
 127.333444 36.052889 221.825661 
 127.333556 36.052889 220.809024 
 127.333556 36.053000 220.784669 
 127.333556 36.053111 220.817783 
 127.333556 36.053222 220.908174 
 127.333667 36.053222 219.800824 
 127.333667 36.053333 219.826845 
 127.333667 36.053445 219.910258 
 127.333778 36.053445 218.832467 
 127.333778 36.053556 218.851434 
 127.333778 36.053667 218.927689 
 127.333889 36.053667 217.881443 
 127.333889 36.053778 217.893569 
 127.333889 36.053889 217.962882 
 127.334000 36.053889 216.946629 
 127.334000 36.054000 216.951939 
 127.334000 36.054111 217.014337 
 127.334111 36.054111 216.029762 
 127.334111 36.054222 216.028519 
 127.334111 36.054333 216.084173 
 127.334111 36.054445 216.196835 
 127.334222 36.054445 215.121998 
 127.334222 36.054556 215.170993 
 127.334222 36.054667 215.276900 
 127.334333 36.054667 214.234271 
 127.334333 36.054778 214.276825 
 127.334333 36.054889 214.376194 
 127.334444 36.054889 213.364236 
 127.334444 36.055000 213.400379 
 127.334444 36.055111 213.493240 
 127.334556 36.055111 212.513638 
 127.334556 36.055222 212.543690 
 127.334556 36.055333 212.630162 
 127.334667 36.055333 211.681481 
 127.334667 36.055444 211.705361 
 127.334667 36.055556 211.785588 
 127.334667 36.055667 211.922361 
 127.334778 36.055667 210.887347 
 127.334778 36.055778 210.961548 
 127.334778 36.055889 211.092201 
 127.334889 36.055889 210.088571 
 127.334889 36.056000 210.156946 
 127.334889 36.056111 210.281346 
 127.335000 36.056111 209.310781 
 127.335000 36.056222 209.373374 
 127.335000 36.056333 209.491921 
 127.335111 36.056333 208.553007 
 127.335111 36.056444 208.609856 
 127.335111 36.056555 208.722584 
 127.335222 36.056555 207.816907 
 127.335222 36.056667 207.868232 
 127.335222 36.056778 207.975364 
 127.335333 36.056778 207.101618 
 127.335333 36.056889 207.147458 
 127.335333 36.057000 207.249255 
 127.335333 36.057111 207.406614 
 127.335444 36.057111 206.449280 
 127.335444 36.057222 206.545733 
 127.335444 36.057333 206.697677 
 127.335556 36.057333 205.772764 
 127.335556 36.057444 205.863913 
 127.335556 36.057555 206.010482 
 127.335667 36.057555 205.119562 
 127.335667 36.057667 205.205632 
 127.335667 36.057778 205.347341 
 127.335778 36.057778 204.488942 
 127.335778 36.057889 204.569883 
 127.335778 36.058000 204.706476 
 127.335889 36.058000 203.882268 
 127.335889 36.058111 203.958407 
 127.335889 36.058222 204.090109 
 127.336000 36.058222 203.298930 
 127.336000 36.058333 203.370310 
 127.336000 36.058444 203.497166 
 127.336000 36.058556 203.679349 
 127.336111 36.058556 202.807398 
 127.336111 36.058667 202.929474 
 127.336111 36.058778 203.106960 
 127.336222 36.058778 202.268560 
 127.336222 36.058889 202.386072 
 127.336222 36.059000 202.558909 
 127.336333 36.059000 201.755511 
 127.336333 36.059111 201.868687 
 127.336333 36.059222 202.037105 
 127.336444 36.059222 201.267587 
 127.336444 36.059333 201.376477 
 127.336444 36.059444 201.540525 
 127.336556 36.059444 200.806236 
 127.336556 36.059556 200.911298 
 127.336556 36.059667 201.070978 
 127.336667 36.059778 200.471960 
 127.336667 36.059889 200.627559 
 127.336667 36.060000 200.838172 
 127.336778 36.060000 200.059720 
 127.336778 36.060111 200.211381 
 127.336778 36.060222 200.417974 
 127.336889 36.060222 199.675493 
 127.336889 36.060333 199.823749 
 127.336889 36.060444 200.026253 
 127.337000 36.060444 199.318731 
 127.337000 36.060556 199.463331 
 127.337000 36.060667 199.662110 
 127.337111 36.060667 198.990812 
 127.337111 36.060778 199.131988 
 127.337111 36.060889 199.327277 
 127.337222 36.060889 198.691309 
 127.337222 36.061000 198.829119 
 127.337222 36.061111 199.021353 
 127.337333 36.061222 198.556177 
 127.337333 36.061333 198.745208 
 127.337333 36.061444 198.988055 
 127.337444 36.061444 198.312680 
 127.337444 36.061556 198.498570 
 127.337444 36.061667 198.738210 
 127.337556 36.061667 198.099978 
 127.337556 36.061778 198.282965 
 127.337556 36.061889 198.519635 
 127.337667 36.061889 197.917716 
 127.337667 36.062000 198.097862 
 127.337667 36.062111 198.332076 
 127.337778 36.062111 197.767397 
 127.337778 36.062222 197.944683 
 127.337778 36.062333 198.176226 
 127.337889 36.062333 197.648268 
 127.337889 36.062444 197.823024 
 127.337889 36.062556 198.051963 
 127.338000 36.062556 197.561734 
 127.338000 36.062667 197.734199 
 127.338000 36.062778 197.960775 
 127.338000 36.062889 198.241143 
 127.338111 36.062889 197.678272 
 127.338111 36.063000 197.902216 
 127.338111 36.063111 198.180223 
 127.338222 36.063111 197.655770 
 127.338222 36.063222 197.877667 
 127.338222 36.063333 198.153556 
 127.338333 36.063333 197.666888 
 127.338333 36.063444 197.886810 
 127.338333 36.063556 198.160655 
 127.338444 36.063556 197.712727 
 127.338444 36.063667 197.930919 
 127.338444 36.063778 198.202965 
 127.338556 36.063778 197.793271 
 127.338556 36.063889 198.010226 
 127.338556 36.064000 198.280130 
 127.338667 36.064000 197.909512 
 127.338667 36.064111 198.125057 
 127.338667 36.064222 198.393487 
 127.338667 36.064333 198.715661 
 127.338778 36.064333 198.275778 
 127.338778 36.064444 198.542814 
 127.338778 36.064556 198.863527 
 127.338889 36.064556 198.463446 
 127.338889 36.064667 198.729838 
 127.338889 36.064778 199.048837 
 127.339000 36.064778 198.688140 
 127.339000 36.064889 198.953466 
 127.339000 36.065000 199.271338 
 127.339111 36.065000 198.950804 
 127.339111 36.065111 199.215316 
 127.339111 36.065222 199.532312 
 127.339222 36.065222 199.251657 
 127.339222 36.065333 199.515438 
 127.339222 36.065445 199.832233 
 127.339333 36.065445 199.591935 
 127.339333 36.065556 199.854832 
 127.339333 36.065667 200.171091 
 127.339333 36.065778 200.539558 
 127.339444 36.065778 200.233689 
 127.339444 36.065889 200.549499 
 127.339444 36.066000 200.917459 
 127.339556 36.066000 200.652895 
 127.339556 36.066111 200.968512 
 127.339556 36.066222 201.336221 
 127.339667 36.066222 201.112780 
 127.339667 36.066333 201.428295 
 127.339667 36.066445 201.796524 
 127.339778 36.066445 201.614611 
 127.339778 36.066556 201.929788 
 127.339778 36.066667 202.298116 
 127.339889 36.066667 202.157869 
 127.339889 36.066778 202.473298 
 127.339889 36.066889 202.841822 
 127.340000 36.066889 202.743705 
 127.340000 36.067000 203.059646 
 127.340000 36.067111 203.428628 
 127.340111 36.067222 203.689878 
 127.340111 36.067333 204.058827 
 127.340111 36.067445 204.480789 
 127.340222 36.067445 204.363517 
 127.340222 36.067556 204.733284 
 127.340222 36.067667 205.156013 
 127.340333 36.067667 205.081753 
 127.340333 36.067778 205.452442 
 127.340333 36.067889 205.876040 
 127.340444 36.067889 205.845169 
 127.340444 36.068000 206.217046 
 127.340444 36.068111 206.641781 
 127.340556 36.068111 206.654516 
 127.340556 36.068222 207.028375 
 127.340556 36.068333 207.453666 
 127.340667 36.068333 207.510257 
 127.340667 36.068444 207.885681 
 127.340667 36.068555 208.312483 
 127.340778 36.068555 208.413293 
 127.340778 36.068667 208.790392 
 127.340778 36.068778 209.218816 
 127.340778 36.068889 209.699980 
 127.340889 36.068889 209.743010 
 127.340889 36.069000 210.174113 
 127.340889 36.069111 210.656339 
 127.341000 36.069111 210.744433 
 127.341000 36.069222 211.177547 
 127.341000 36.069333 211.661731 
 127.341111 36.069333 211.795037 
 127.341111 36.069444 212.230438 
 127.341111 36.069555 212.716857 
 127.341222 36.069555 212.895876 
 127.341222 36.069667 213.333681 
 127.341222 36.069778 213.823339 
 127.341333 36.069778 214.047914 
 127.341333 36.069889 214.487691 
 127.341333 36.070000 214.979985 
 127.341444 36.070000 215.250944 
 127.341444 36.070111 215.693521 
 127.341444 36.070222 216.188574 
 127.341444 36.070333 216.734346 
 127.341556 36.070333 216.951456 
 127.341556 36.070444 217.449551 
 127.341556 36.070555 217.998314 
 127.341667 36.070555 218.262712 
 127.341667 36.070667 218.763976 
 127.341667 36.070778 219.316851 
 127.341778 36.070778 219.628269 
 127.341778 36.070889 220.132163 
 127.341778 36.071000 220.688449 
 127.341889 36.071000 221.047867 
 127.341889 36.071111 221.555338 
 127.341889 36.071222 222.115166 
 127.342000 36.071222 222.522347 
 127.342000 36.071333 223.033684 
 127.342000 36.071444 223.597343 
 127.342111 36.071444 224.053256 
 127.342111 36.071556 224.569525 
 127.342111 36.071667 225.136220 
 127.342111 36.071778 225.755235 
 127.342222 36.071778 226.161470 
 127.342222 36.071889 226.732340 
 127.342222 36.072000 227.355498 
 127.342333 36.072000 227.810760 
 127.342333 36.072111 228.386099 
 127.342333 36.072222 229.013695 
 127.342444 36.072222 229.519047 
 127.342444 36.072333 230.100039 
 127.342444 36.072444 230.731174 
 127.342556 36.072444 231.286174 
 127.342556 36.072556 231.872084 
 127.342556 36.072667 232.508090 
 127.342667 36.072667 233.113965 
 127.342667 36.072778 233.704938 
 127.342667 36.072889 234.345963 
 127.342778 36.072889 235.002127 
 127.342778 36.073000 235.598465 
 127.342778 36.073111 236.244810 
 127.342778 36.073222 236.943336 
 127.342889 36.073222 237.554514 
 127.342889 36.073333 238.207497 
 127.342889 36.073444 238.910304 
 127.343000 36.073444 239.572805 
 127.343000 36.073556 240.231575 
 127.343000 36.073667 240.940127 
 127.343111 36.073667 241.655368 
 127.343111 36.073778 242.320083 
 127.343111 36.073889 243.034536 
 127.343222 36.073889 243.801781 
 127.343222 36.074000 244.472750 
 127.343222 36.074111 245.194699 
 127.343333 36.074111 246.015378 
 127.343333 36.074222 246.691642 
 127.343333 36.074333 247.419976 
 127.343444 36.074333 248.293363 
 127.343444 36.074444 248.976344 
 127.343444 36.074556 249.711377 
 127.343444 36.074667 250.495886 
 127.343556 36.074667 251.329109 
 127.343556 36.074778 252.071008 
 127.343556 36.074889 252.862343 
 127.343667 36.074889 253.749373 
 127.343667 36.075000 254.498457 
 127.343667 36.075111 255.298355 
 127.343778 36.075111 256.240835 
 127.343778 36.075222 256.996021 
 127.343778 36.075333 257.803249 
 127.343889 36.075333 258.800284 
 127.343889 36.075444 259.563136 
 127.343889 36.075556 260.378019 
 127.344000 36.075556 261.431599 
 127.344000 36.075667 262.202294 
 127.344000 36.075778 263.025009 
 127.344000 36.075889 263.898413 
 127.344111 36.075889 264.914163 
 127.344111 36.076000 265.743654 
 127.344111 36.076111 266.625195 
 127.344222 36.076111 267.698677 
 127.344222 36.076222 268.536497 
 127.344222 36.076333 269.426359 
 127.344333 36.076333 270.556337 
 127.344333 36.076444 271.402817 
 127.344333 36.076556 272.301334 
 127.344444 36.076556 273.490030 
 127.344444 36.076667 274.346875 
 127.344444 36.076778 275.252719 
 127.344556 36.076778 276.498730 
 127.344556 36.076889 277.364774 
 127.344556 36.077000 278.279784 
 127.344667 36.077000 279.585526 
 127.344667 36.077111 280.460966 
 127.344667 36.077222 281.385336 
 127.344667 36.077333 282.361773 
 127.344778 36.077333 283.634408 
 127.344778 36.077444 284.568480 
 127.344778 36.077556 285.554618 
 127.344889 36.077556 286.888260 
 127.344889 36.077667 287.833901 
 127.344889 36.077778 288.828275 
 127.345000 36.077778 290.221317 
 127.345000 36.077889 291.177224 
 127.345000 36.078000 292.181830 
 127.345111 36.078000 293.636949 
 127.345111 36.078111 294.603327 
 127.345111 36.078222 295.618374 
 127.345222 36.078222 297.133787 
 127.345222 36.078333 298.110988 
 127.345222 36.078445 299.138635 
 127.345222 36.078556 300.214790 
 127.345333 36.078556 301.703650 
 127.345333 36.078667 302.742321 
 127.345333 36.078778 303.829469 
 127.345444 36.078778 305.379921 
 127.345444 36.078889 306.429972 
 127.345444 36.079000 307.528471 
 127.345556 36.079000 309.143466 
 127.345556 36.079111 310.205117 
 127.345556 36.079222 311.317141 
 127.345667 36.079222 312.994520 
 127.345667 36.079333 314.066331 
 127.345667 36.079445 315.190309 
 127.345667 36.079556 316.362550 
 127.345778 36.079556 318.017368 
 127.345778 36.079667 319.153526 
 127.345778 36.079778 320.337920 
 127.345889 36.079778 322.056629 
 127.345889 36.079889 323.205335 
 127.345889 36.080000 324.402250 
 127.346000 36.080000 326.188094 
 127.346000 36.080111 327.349581 
 127.346000 36.080222 328.561377 
 127.346000 36.080333 329.821230 
 127.346111 36.080333 331.584627 
 127.346111 36.080444 332.809574 
 127.346111 36.080556 334.082554 
 127.346222 36.080556 335.914554 
 127.346222 36.080667 337.152891 
 127.346222 36.080778 338.439238 
 127.346333 36.080778 340.337540 
 127.346333 36.080889 341.589649 
 127.346333 36.081000 342.892023 
 127.346333 36.081111 344.242258 
 127.346444 36.081111 346.124029 
 
