# Supplementary material for: Terrain Referenced Navigation Using a Multilayer Radial Basis Function-Based Extreme Learning Machine
Source: Hindawi journal article supplement (doi:10.1155/2019/9142694), 2019-07-11
Supplement: f1 [file 9142694.f1.zip › 9142694_Supplementary information files/CompareMatchingResults_180909/ELMTrainResult.dat]

127.173333 35.703000 511.153438 
 127.173444 35.703000 501.983717 
 127.173556 35.703000 493.123656 
 127.173667 35.703000 484.556555 
 127.173889 35.703000 468.317520 
 127.174111 35.703000 453.244885 
 127.174222 35.703000 446.142054 
 127.174333 35.703000 439.317459 
 127.174444 35.703000 432.779233 
 127.173444 35.703222 496.992465 
 127.173556 35.703222 488.130648 
 127.173667 35.703222 479.560625 
 127.173778 35.703222 471.293067 
 127.174000 35.703222 455.628060 
 127.174222 35.703222 441.114191 
 127.174333 35.703222 434.279759 
 127.174444 35.703222 427.730563 
 127.174556 35.703222 421.453801 
 127.173556 35.703445 483.387240 
 127.173667 35.703445 474.813283 
 127.173778 35.703445 466.540644 
 127.173889 35.703445 458.553618 
 127.174111 35.703445 443.451161 
 127.174333 35.703445 429.484771 
 127.174444 35.703445 422.923660 
 127.174556 35.703445 416.633843 
 127.174667 35.703445 410.622688 
 127.173667 35.703778 468.147209 
 127.173778 35.703778 459.865071 
 127.173889 35.703778 451.866834 
 127.174000 35.703778 444.162347 
 127.174222 35.703778 429.599418 
 127.174444 35.703778 416.155446 
 127.174556 35.703778 409.844285 
 127.174667 35.703778 403.810131 
 127.174778 35.703778 398.041063 
 127.173778 35.704000 455.711056 
 127.173889 35.704000 447.704103 
 127.174000 35.704000 439.989784 
 127.174111 35.704000 432.553346 
 127.174333 35.704000 418.527429 
 127.174556 35.704000 405.605806 
 127.174667 35.704000 399.555151 
 127.174778 35.704000 393.768466 
 127.174889 35.704000 388.252405 
 127.173889 35.700556 539.964076 
 127.174000 35.700556 532.290446 
 127.174111 35.700556 524.913060 
 127.174222 35.700556 517.840814 
 127.174444 35.700556 504.578592 
 127.174667 35.700556 492.483117 
 127.174778 35.700556 486.864453 
 127.174889 35.700556 481.534261 
 127.175000 35.700556 476.481746 
 127.173889 35.700667 536.019511 
 127.174000 35.700667 528.348344 
 127.174111 35.700667 520.972798 
 127.174222 35.700667 513.901769 
 127.174444 35.700667 500.640120 
 127.174667 35.700667 488.542749 
 127.174778 35.700667 482.922214 
 127.174889 35.700667 477.589539 
 127.175000 35.700667 472.533928 
 127.173889 35.700778 532.148871 
 127.174000 35.700778 524.479908 
 127.174111 35.700778 517.105947 
 127.174222 35.700778 510.035882 
 127.174444 35.700778 496.774313 
 127.174667 35.700778 484.674563 
 127.174778 35.700778 479.051919 
 127.174889 35.700778 473.716529 
 127.175000 35.700778 468.657592 
 127.174000 35.700778 524.479908 
 127.174111 35.700778 517.105947 
 127.174222 35.700778 510.035882 
 127.174333 35.700778 503.255994 
 127.174556 35.700778 490.578108 
 127.174778 35.700778 479.051919 
 127.174889 35.700778 473.716529 
 127.175000 35.700778 468.657592 
 127.175111 35.700778 463.880642 
 127.174000 35.700889 520.671516 
 127.174111 35.700889 513.298889 
 127.174222 35.700889 506.229541 
 127.174333 35.700889 499.449752 
 127.174556 35.700889 486.770222 
 127.174778 35.700889 475.239944 
 127.174889 35.700889 469.901596 
 127.175000 35.700889 464.839092 
 127.175111 35.700889 460.057972 
 127.174000 35.701000 516.935951 
 127.174111 35.701000 509.564405 
 127.174222 35.701000 502.495522 
 127.174333 35.701000 495.715585 
 127.174556 35.701000 483.033926 
 127.174778 35.701000 471.499085 
 127.174889 35.701000 466.157548 
 127.175000 35.701000 461.091248 
 127.175111 35.701000 456.305734 
 127.174000 35.701111 513.260052 
 127.174111 35.701111 505.889336 
 127.174222 35.701111 498.820670 
 127.174333 35.701111 492.040338 
 127.174556 35.701111 479.356057 
 127.174778 35.701111 467.816165 
 127.174889 35.701111 462.471197 
 127.175000 35.701111 457.400861 
 127.175111 35.701111 452.610711 
 127.174111 35.701111 505.889336 
 127.174222 35.701111 498.820670 
 127.174333 35.701111 492.040338 
 127.174444 35.701111 485.556377 
 127.174667 35.701111 473.446574 
 127.174889 35.701111 462.471197 
 127.175000 35.701111 457.400861 
 127.175111 35.701111 452.610711 
 127.175222 35.701111 448.090875 
 127.174111 35.701222 502.286012 
 127.174222 35.701222 495.217313 
 127.174333 35.701222 488.436339 
 127.174444 35.701222 481.951130 
 127.174667 35.701222 469.837014 
 127.174889 35.701222 458.854913 
 127.175000 35.701222 453.780313 
 127.175111 35.701222 448.985305 
 127.175222 35.701222 444.460011 
 127.174111 35.701333 498.741729 
 127.174222 35.701333 491.672748 
 127.174333 35.701333 484.890884 
 127.174444 35.701333 478.404180 
 127.174667 35.701333 466.285260 
 127.174889 35.701333 455.295949 
 127.175000 35.701333 450.216844 
 127.175111 35.701333 445.416739 
 127.175222 35.701333 440.885747 
 127.174111 35.701445 495.262447 
 127.174222 35.701445 488.192935 
 127.174333 35.701445 481.409934 
 127.174444 35.701445 474.921490 
 127.174667 35.701445 462.797284 
 127.174889 35.701445 451.800290 
 127.175000 35.701445 446.716446 
 127.175111 35.701445 441.911011 
 127.175222 35.701445 437.374091 
 127.174222 35.701445 488.192935 
 127.174333 35.701445 481.409934 
 127.174444 35.701445 474.921490 
 127.174556 35.701445 468.714870 
 127.174778 35.701445 457.156961 
 127.175000 35.701445 446.716446 
 127.175111 35.701445 441.911011 
 127.175222 35.701445 437.374091 
 127.175333 35.701445 433.110478 
 127.174222 35.701556 484.783391 
 127.174333 35.701556 477.999009 
 127.174444 35.701556 471.508585 
 127.174556 35.701556 465.299384 
 127.174778 35.701556 453.734523 
 127.175000 35.701556 443.284676 
 127.175111 35.701556 438.473690 
 127.175222 35.701556 433.930625 
 127.175333 35.701556 429.660282 
 127.174222 35.701667 481.432084 
 127.174333 35.701667 474.646073 
 127.174444 35.701667 468.153421 
 127.174556 35.701667 461.941393 
 127.174778 35.701667 450.369090 
 127.175000 35.701667 439.909429 
 127.175111 35.701667 435.092651 
 127.175222 35.701667 430.543201 
 127.175333 35.701667 426.265892 
 127.174222 35.701778 478.150237 
 127.174333 35.701778 471.362355 
 127.174444 35.701778 464.867237 
 127.174556 35.701778 458.652145 
 127.174778 35.701778 447.071939 
 127.175000 35.701778 436.602013 
 127.175111 35.701778 431.779224 
 127.175222 35.701778 427.223172 
 127.175333 35.701778 422.938681 
 127.174333 35.701889 468.136261 
 127.174444 35.701889 461.638429 
 127.174556 35.701889 455.420028 
 127.174667 35.701889 449.488290 
 127.174889 35.701889 438.455867 
 127.175111 35.701889 428.521713 
 127.175222 35.701889 423.958818 
 127.175333 35.701889 419.666909 
 127.175444 35.701889 415.636967 
 127.174333 35.702000 464.978587 
 127.174444 35.702000 458.477804 
 127.174556 35.702000 452.255858 
 127.174667 35.702000 446.319990 
 127.174889 35.702000 435.277541 
 127.175111 35.702000 425.331024 
 127.175222 35.702000 420.761073 
 127.175333 35.702000 416.461532 
 127.175444 35.702000 412.423374 
 127.174333 35.702111 461.878175 
 127.174444 35.702111 455.374194 
 127.174556 35.702111 449.148457 
 127.174667 35.702111 443.208213 
 127.174889 35.702111 432.155252 
 127.175111 35.702111 422.195890 
 127.175222 35.702111 417.618641 
 127.175333 35.702111 413.311230 
 127.175444 35.702111 409.264618 
 127.174333 35.702222 458.845393 
 127.174444 35.702222 452.337977 
 127.174556 35.702222 446.108216 
 127.174667 35.702222 440.163367 
 127.174889 35.702222 429.099444 
 127.175111 35.702222 419.126798 
 127.175222 35.702222 414.542038 
 127.175333 35.702222 410.226546 
 127.175444 35.702222 406.171273 
 127.174444 35.702222 452.337977 
 127.174556 35.702222 446.108216 
 127.174667 35.702222 440.163367 
 127.174778 35.702222 434.491627 
 127.175000 35.702222 423.975949 
 127.175222 35.702222 414.542038 
 127.175333 35.702222 410.226546 
 127.175444 35.702222 406.171273 
 127.175556 35.702222 402.380330 
 127.174444 35.702333 449.358418 
 127.174556 35.702333 443.124386 
 127.174667 35.702333 437.174686 
 127.174778 35.702333 431.497509 
 127.175000 35.702333 420.969221 
 127.175222 35.702333 411.520389 
 127.175333 35.702333 407.196578 
 127.175444 35.702333 403.132406 
 127.175556 35.702333 399.332000 
 127.174444 35.702445 446.440510 
 127.174556 35.702445 440.201969 
 127.174667 35.702445 434.247181 
 127.174778 35.702445 428.564331 
 127.175000 35.702445 418.022970 
 127.175222 35.702445 408.558762 
 127.175333 35.702445 404.226406 
 127.175444 35.702445 400.153112 
 127.175556 35.702445 396.343022 
 127.174444 35.702556 443.588828 
 127.174556 35.702556 437.345546 
 127.174667 35.702556 431.385442 
 127.174778 35.702556 425.696696 
 127.175000 35.702556 415.141820 
 127.175222 35.702556 405.661808 
 127.175333 35.702556 401.320700 
 127.175444 35.702556 397.238079 
 127.175556 35.702556 393.418102 
 127.174556 35.702556 437.345546 
 127.174667 35.702556 431.385442 
 127.174778 35.702556 425.696696 
 127.174889 35.702556 420.285786 
 127.175111 35.702556 410.270488 
 127.175333 35.702556 401.320700 
 127.175444 35.702556 397.238079 
 127.175556 35.702556 393.418102 
 127.175667 35.702556 389.852569 
 127.174556 35.702667 434.545003 
 127.174667 35.702667 428.579338 
 127.174778 35.702667 422.884451 
 127.174889 35.702667 417.466830 
 127.175111 35.702667 407.436389 
 127.175333 35.702667 398.469180 
 127.175444 35.702667 394.376992 
 127.175556 35.702667 390.546893 
 127.175667 35.702667 386.970666 
 127.174556 35.702778 431.809687 
 127.174667 35.702778 425.838235 
 127.174778 35.702778 420.136982 
 127.174889 35.702778 414.712432 
 127.175111 35.702778 404.666416 
 127.175333 35.702778 395.681367 
 127.175444 35.702778 391.579410 
 127.175556 35.702778 387.738986 
 127.175667 35.702778 384.151865 
 127.174556 35.702889 429.129904 
 127.174667 35.702889 423.152419 
 127.174778 35.702889 417.444557 
 127.174889 35.702889 412.012832 
 127.175111 35.702889 401.950759 
 127.175333 35.702889 392.947391 
 127.175444 35.702889 388.835425 
 127.175556 35.702889 384.984441 
 127.175667 35.702889 381.386191 
 127.174667 35.702889 423.152419 
 127.174778 35.702889 417.444557 
 127.174889 35.702889 412.012832 
 127.175000 35.702889 406.846322 
 127.175222 35.702889 397.316127 
 127.175444 35.702889 388.835425 
 127.175556 35.702889 384.984441 
 127.175667 35.702889 381.386191 
 127.175778 35.702889 378.044146 
 127.174667 35.703000 420.530844 
 127.174778 35.703000 414.816151 
 127.174889 35.703000 409.377033 
 127.175000 35.703000 404.202560 
 127.175222 35.703000 394.654753 
 127.175444 35.703000 386.154195 
 127.175556 35.703000 382.292450 
 127.175667 35.703000 378.682875 
 127.175778 35.703000 375.328957 
 127.174667 35.703111 417.964213 
 127.174778 35.703111 412.242443 
 127.174889 35.703111 406.795689 
 127.175000 35.703111 401.613009 
 127.175222 35.703111 392.047108 
 127.175444 35.703111 383.526218 
 127.175556 35.703111 379.653476 
 127.175667 35.703111 376.032338 
 127.175778 35.703111 372.666315 
 127.174667 35.703222 415.456815 
 127.174778 35.703222 409.727735 
 127.174889 35.703222 404.273114 
 127.175000 35.703222 399.081998 
 127.175222 35.703222 389.497553 
 127.175444 35.703222 380.955888 
 127.175556 35.703222 377.071929 
 127.175667 35.703222 373.439014 
 127.175778 35.703222 370.060671 
 127.174778 35.703222 409.727735 
 127.174889 35.703222 404.273114 
 127.175000 35.703222 399.081998 
 127.175111 35.703222 394.160162 
 127.175333 35.703222 385.099184 
 127.175556 35.703222 377.071929 
 127.175667 35.703222 373.439014 
 127.175778 35.703222 370.060671 
 127.175889 35.703222 366.929463 
 127.174778 35.703333 407.275926 
 127.174889 35.703333 401.813222 
 127.175000 35.703333 396.613457 
 127.175111 35.703333 391.682421 
 127.175333 35.703333 382.601370 
 127.175556 35.703333 374.551831 
 127.175667 35.703333 370.906943 
 127.175778 35.703333 367.516087 
 127.175889 35.703333 364.371810 
 127.174778 35.703445 404.878305 
 127.174889 35.703445 399.407273 
 127.175000 35.703445 394.198617 
 127.175111 35.703445 389.258140 
 127.175333 35.703445 380.156536 
 127.175556 35.703445 372.084238 
 127.175667 35.703445 368.427141 
 127.175778 35.703445 365.023538 
 127.175889 35.703445 361.865959 
 127.174778 35.703556 402.542845 
 127.174889 35.703556 397.063271 
 127.175000 35.703556 391.845510 
 127.175111 35.703556 386.895383 
 127.175333 35.703556 377.772819 
 127.175556 35.703556 369.677364 
 127.175667 35.703556 366.007864 
 127.175778 35.703556 362.591325 
 127.175889 35.703556 359.420254 
 127.174889 35.703556 397.063271 
 127.175000 35.703556 391.845510 
 127.175111 35.703556 386.895383 
 127.175222 35.703556 382.202798 
 127.175444 35.703556 373.596234 
 127.175667 35.703556 366.007864 
 127.175778 35.703556 362.591325 
 127.175889 35.703556 359.420254 
 127.176000 35.703556 356.497526 
 127.174889 35.703667 394.772878 
 127.175000 35.703667 389.545770 
 127.175111 35.703667 384.585752 
 127.175222 35.703667 379.882717 
 127.175444 35.703667 371.253614 
 127.175667 35.703667 363.640521 
 127.175778 35.703667 360.210810 
 127.175889 35.703667 357.026015 
 127.176000 35.703667 354.089033 
 127.174889 35.703778 392.543702 
 127.175000 35.703778 387.307037 
 127.175111 35.703778 382.336919 
 127.175222 35.703778 377.623229 
 127.175444 35.703778 368.971189 
 127.175667 35.703778 361.332985 
 127.175778 35.703778 357.889912 
 127.175889 35.703778 354.691207 
 127.176000 35.703778 351.739788 
 127.174889 35.703889 390.367806 
 127.175000 35.703889 385.121339 
 127.175111 35.703889 380.140881 
 127.175222 35.703889 375.416295 
 127.175444 35.703889 366.740838 
 127.175667 35.703889 359.077050 
 127.175778 35.703889 355.620382 
 127.175889 35.703889 352.407532 
 127.176000 35.703889 349.441443 
 127.175000 35.703889 385.121339 
 127.175111 35.703889 380.140881 
 127.175222 35.703889 375.416295 
 127.175333 35.703889 370.952701 
 127.175556 35.703889 362.785087 
 127.175778 35.703889 355.620382 
 127.175889 35.703889 352.407532 
 127.176000 35.703889 349.441443 
 127.176111 35.703889 346.715400 
 127.175000 35.704000 382.995928 
 127.175111 35.704000 378.004923 
 127.175222 35.704000 373.269238 
 127.175333 35.704000 368.794012 
 127.175556 35.704000 360.601506 
 127.175778 35.704000 353.409758 
 127.175889 35.704000 350.182578 
 127.176000 35.704000 347.201638 
 127.176111 35.704000 344.460200 
 127.175000 35.704111 380.923226 
 127.175111 35.704111 375.921432 
 127.175222 35.704111 371.174407 
 127.175333 35.704111 366.687310 
 127.175556 35.704111 358.469435 
 127.175778 35.704111 351.250173 
 127.175889 35.704111 348.008430 
 127.176000 35.704111 345.012405 
 127.176111 35.704111 342.255340 
 127.175000 35.704222 378.906682 
 127.175111 35.704222 373.893874 
 127.175222 35.704222 369.135288 
 127.175333 35.704222 364.636099 
 127.175556 35.704222 356.392423 
 127.175778 35.704222 349.145222 
 127.175889 35.704222 345.888706 
 127.176000 35.704222 342.877390 
 127.176111 35.704222 340.104493 
 127.175111 35.704222 373.893874 
 127.175222 35.704222 369.135288 
 127.175333 35.704222 364.636099 
 127.175444 35.704222 360.386997 
 127.175667 35.704222 352.643924 
 127.175889 35.704222 345.888706 
 127.176000 35.704222 342.877390 
 127.176111 35.704222 340.104493 
 127.176222 35.704222 337.572336 
 127.175111 35.704333 371.925332 
 127.175222 35.704333 367.154984 
 127.175333 35.704333 362.643505 
 127.175444 35.704333 358.381570 
 127.175667 35.704333 350.611245 
 127.175889 35.704333 343.826654 
 127.176000 35.704333 340.799868 
 127.176111 35.704333 338.010961 
 127.176222 35.704333 335.462284 
 127.175111 35.704444 370.008775 
 127.175222 35.704444 365.226422 
 127.175333 35.704444 360.702415 
 127.175444 35.704444 356.427408 
 127.175667 35.704444 348.629355 
 127.175889 35.704444 341.814923 
 127.176000 35.704444 338.772432 
 127.176111 35.704444 335.967285 
 127.176222 35.704444 333.401856 
 127.175111 35.704555 368.150535 
 127.175222 35.704555 363.355978 
 127.175333 35.704555 358.819245 
 127.175444 35.704555 354.530972 
 127.175667 35.704555 346.704814 
 127.175889 35.704555 339.860173 
 127.176000 35.704555 336.801800 
 127.176111 35.704555 333.980236 
 127.176222 35.704555 331.397883 
 127.175222 35.704555 363.355978 
 127.175333 35.704555 358.819245 
 127.175444 35.704555 354.530972 
 127.175556 35.704555 350.495666 
 127.175778 35.704555 343.162208 
 127.176000 35.704555 336.801800 
 127.176111 35.704555 333.980236 
 127.176222 35.704555 331.397883 
 127.176333 35.704555 329.048701 
 127.175222 35.704667 361.536959 
 127.175333 35.704667 356.987260 
 127.175444 35.704667 352.685482 
 127.175556 35.704667 348.636155 
 127.175778 35.704667 341.273067 
 127.176000 35.704667 334.880937 
 127.176111 35.704667 332.042724 
 127.176222 35.704667 329.443217 
 127.176333 35.704667 327.076349 
 127.175222 35.704778 359.775366 
 127.175333 35.704778 355.212507 
 127.175444 35.704778 350.897031 
 127.175556 35.704778 346.833493 
 127.175778 35.704778 339.440406 
 127.176000 35.704778 333.016196 
 127.176111 35.704778 330.161160 
 127.176222 35.704778 327.544327 
 127.176333 35.704778 325.159604 
 127.175222 35.704889 358.064886 
 127.175333 35.704889 353.488626 
 127.175444 35.704889 349.159214 
 127.175556 35.704889 345.081227 
 127.175778 35.704889 337.657668 
 127.176000 35.704889 331.200910 
 127.176111 35.704889 328.328818 
 127.176222 35.704889 325.694428 
 127.176333 35.704889 323.291622 
 127.175333 35.704889 353.488626 
 127.175444 35.704889 349.159214 
 127.175556 35.704889 345.081227 
 127.175667 35.704889 341.246090 
 127.175889 35.704889 334.308218 
 127.176111 35.704889 328.328818 
 127.176222 35.704889 325.694428 
 127.176333 35.704889 323.291622 
 127.176444 35.704889 321.122211 
 127.175333 35.705000 351.818470 
 127.175444 35.705000 347.474906 
 127.175556 35.705000 343.382257 
 127.175667 35.705000 339.531926 
 127.175889 35.705000 332.562127 
 127.176111 35.705000 326.548737 
 127.176222 35.705000 323.896590 
 127.176333 35.705000 321.475500 
 127.176444 35.705000 319.287311 
 127.175333 35.705111 350.204524 
 127.175444 35.705111 345.846618 
 127.175556 35.705111 341.739120 
 127.175667 35.705111 337.873412 
 127.175889 35.705111 330.871324 
 127.176111 35.705111 324.823596 
 127.176222 35.705111 322.153522 
 127.176333 35.705111 319.713982 
 127.176444 35.705111 317.506851 
 127.175333 35.705222 348.640989 
 127.175444 35.705222 344.268500 
 127.175556 35.705222 340.145915 
 127.175667 35.705222 336.264592 
 127.175889 35.705222 329.229746 
 127.176111 35.705222 323.147214 
 127.176222 35.705222 320.458982 
 127.176333 35.705222 318.000762 
 127.176444 35.705222 315.774460 
 127.175444 35.705222 344.268500 
 127.175556 35.705222 340.145915 
 127.175667 35.705222 336.264592 
 127.175778 35.705222 332.628474 
 127.176000 35.705222 326.071659 
 127.176222 35.705222 320.458982 
 127.176333 35.705222 318.000762 
 127.176444 35.705222 315.774460 
 127.176556 35.705222 313.774664 
 127.175444 35.705333 342.745733 
 127.175556 35.705333 338.607875 
 127.175667 35.705333 334.710754 
 127.175778 35.705333 331.058339 
 127.176000 35.705333 324.467391 
 127.176222 35.705333 318.818552 
 127.176333 35.705333 316.341487 
 127.176444 35.705333 314.095852 
 127.176556 35.705333 312.076206 
 127.175444 35.705444 341.272834 
 127.175556 35.705444 337.119464 
 127.175667 35.705444 333.206308 
 127.175778 35.705444 329.537360 
 127.176000 35.705444 322.911811 
 127.176222 35.705444 317.226346 
 127.176333 35.705444 314.730206 
 127.176444 35.705444 312.465009 
 127.176556 35.705444 310.425285 
 127.175444 35.705555 339.854622 
 127.175556 35.705555 335.685557 
 127.175667 35.705555 331.756183 
 127.175778 35.705555 328.070525 
 127.176000 35.705555 321.410024 
 127.176222 35.705555 315.687598 
 127.176333 35.705555 313.172218 
 127.176444 35.705555 310.887297 
 127.176556 35.705555 308.827337 
 127.175556 35.705555 335.685557 
 127.175667 35.705555 331.756183 
 127.175778 35.705555 328.070525 
 127.175889 35.705555 324.620693 
 127.176111 35.705555 318.431439 
 127.176333 35.705555 313.172218 
 127.176444 35.705555 310.887297 
 127.176556 35.705555 308.827337 
 127.176667 35.705555 306.993684 
 127.175556 35.705667 334.300978 
 127.175667 35.705667 330.355150 
 127.175778 35.705667 326.652545 
 127.175889 35.705667 323.185248 
 127.176111 35.705667 316.959570 
 127.176333 35.705667 311.661923 
 127.176444 35.705667 309.357050 
 127.176556 35.705667 307.276625 
 127.176667 35.705667 305.422029 
 127.175556 35.705778 332.968004 
 127.175667 35.705778 329.005513 
 127.175778 35.705778 325.285753 
 127.175889 35.705778 321.800786 
 127.176111 35.705778 315.538279 
 127.176333 35.705778 310.201810 
 127.176444 35.705778 307.876790 
 127.176556 35.705778 305.775709 
 127.176667 35.705778 303.899979 
 127.175556 35.705889 331.688556 
 127.175667 35.705889 327.709221 
 127.175778 35.705889 323.972130 
 127.175889 35.705889 320.469319 
 127.176111 35.705889 314.169644 
 127.176333 35.705889 308.794026 
 127.176444 35.705889 306.448700 
 127.176556 35.705889 304.326804 
 127.176667 35.705889 302.429787 
 127.175667 35.705889 327.709221 
 127.175778 35.705889 323.972130 
 127.175889 35.705889 320.469319 
 127.176000 35.705889 317.204210 
 127.176222 35.705889 311.368372 
 127.176444 35.705889 306.448700 
 127.176556 35.705889 304.326804 
 127.176667 35.705889 302.429787 
 127.176778 35.705889 300.752824 
 127.175667 35.706000 326.461579 
 127.175778 35.706000 322.706921 
 127.175889 35.706000 319.186031 
 127.176000 35.706000 315.902360 
 127.176222 35.706000 310.027897 
 127.176444 35.706000 305.067630 
 127.176556 35.706000 302.924693 
 127.176667 35.706000 301.006162 
 127.176778 35.706000 299.307180 
 127.175667 35.706111 325.266643 
 127.175778 35.706111 321.494242 
 127.175889 35.706111 317.955099 
 127.176000 35.706111 314.652696 
 127.176222 35.706111 308.739279 
 127.176444 35.706111 303.738097 
 127.176556 35.706111 301.573963 
 127.176667 35.706111 299.633765 
 127.176778 35.706111 297.912615 
 127.175667 35.706222 324.120066 
 127.175778 35.706222 320.329686 
 127.175889 35.706222 316.772055 
 127.176000 35.706222 313.450687 
 127.176222 35.706222 307.497851 
 127.176444 35.706222 302.455295 
 127.176556 35.706222 300.269735 
 127.176667 35.706222 298.307644 
 127.176778 35.706222 296.564100 
 127.175778 35.706222 320.329686 
 127.175889 35.706222 316.772055 
 127.176000 35.706222 313.450687 
 127.176111 35.706222 310.358336 
 127.176333 35.706222 304.862772 
 127.176556 35.706222 300.269735 
 127.176667 35.706222 298.307644 
 127.176778 35.706222 296.564100 
 127.176889 35.706222 295.040025 
 127.175778 35.706333 319.217027 
 127.175889 35.706333 315.640737 
 127.176000 35.706333 312.300235 
 127.176111 35.706333 309.188246 
 127.176333 35.706333 303.651961 
 127.176556 35.706333 299.016264 
 127.176667 35.706333 297.032129 
 127.176778 35.706333 295.266042 
 127.176889 35.706333 293.718963 
 127.175778 35.706444 318.152207 
 127.175889 35.706444 314.557022 
 127.176000 35.706444 311.197151 
 127.176111 35.706444 308.065292 
 127.176333 35.706444 302.487823 
 127.176556 35.706444 297.809009 
 127.176667 35.706444 295.802603 
 127.176778 35.706444 294.013748 
 127.176889 35.706444 292.443440 
 127.175778 35.706555 317.138657 
 127.175889 35.706555 313.524408 
 127.176000 35.706555 310.145001 
 127.176111 35.706555 306.993106 
 127.176333 35.706555 301.374134 
 127.176556 35.706555 296.651895 
 127.176667 35.706555 294.623066 
 127.176778 35.706555 292.811296 
 127.176889 35.706555 291.217615 
 127.175889 35.706555 313.524408 
 127.176000 35.706555 310.145001 
 127.176111 35.706555 306.993106 
 127.176222 35.706555 304.071667 
 127.176444 35.706555 298.902803 
 127.176667 35.706555 294.623066 
 127.176778 35.706555 292.811296 
 127.176889 35.706555 291.217615 
 127.177000 35.706555 289.837746 
 127.175889 35.706667 312.539115 
 127.176000 35.706667 309.139939 
 127.176111 35.706667 305.967775 
 127.176222 35.706667 303.025601 
 127.176444 35.706667 297.813812 
 127.176667 35.706667 293.489237 
 127.176778 35.706667 291.654324 
 127.176889 35.706667 290.037046 
 127.177000 35.706667 288.633088 
 127.175889 35.706778 311.602739 
 127.176000 35.706778 308.183592 
 127.176111 35.706778 304.990961 
 127.176222 35.706778 302.027856 
 127.176444 35.706778 296.772754 
 127.176667 35.706778 292.402963 
 127.176778 35.706778 290.544722 
 127.176889 35.706778 288.903662 
 127.177000 35.706778 287.475433 
 127.175889 35.706889 310.716540 
 127.176000 35.706889 307.277258 
 127.176111 35.706889 304.063997 
 127.176222 35.706889 301.079801 
 127.176444 35.706889 295.781076 
 127.176667 35.706889 291.365769 
 127.176778 35.706889 289.484054 
 127.176889 35.706889 287.819069 
 127.177000 35.706889 286.366429 
 127.176000 35.706889 307.277258 
 127.176111 35.706889 304.063997 
 127.176222 35.706889 301.079801 
 127.176333 35.706889 298.318028 
 127.176556 35.706889 293.463067 
 127.176778 35.706889 289.484054 
 127.176889 35.706889 287.819069 
 127.177000 35.706889 286.366429 
 127.177111 35.706889 285.126668 
 127.176000 35.707000 306.417596 
 127.176111 35.707000 303.183472 
 127.176222 35.707000 300.177953 
 127.176333 35.707000 297.394366 
 127.176556 35.707000 292.494375 
 127.176778 35.707000 288.468450 
 127.176889 35.707000 286.779316 
 127.177000 35.707000 285.302040 
 127.177111 35.707000 284.037198 
 127.176000 35.707111 305.607341 
 127.176111 35.707111 302.352192 
 127.176222 35.707111 299.325192 
 127.176333 35.707111 296.519635 
 127.176556 35.707111 291.574312 
 127.176778 35.707111 287.501183 
 127.176889 35.707111 285.787759 
 127.177000 35.707111 284.285709 
 127.177111 35.707111 282.995649 
 127.176000 35.707222 304.843486 
 127.176111 35.707222 301.567079 
 127.176222 35.707222 298.518366 
 127.176333 35.707222 295.690608 
 127.176556 35.707222 290.699494 
 127.176778 35.707222 286.578708 
 127.176889 35.707222 284.840768 
 127.177000 35.707222 283.313720 
 127.177111 35.707222 281.998221 
 127.176111 35.707222 301.567079 
 127.176222 35.707222 298.518366 
 127.176333 35.707222 295.690608 
 127.176444 35.707222 293.086311 
 127.176667 35.707222 288.532038 
 127.176889 35.707222 284.840768 
 127.177000 35.707222 283.313720 
 127.177111 35.707222 281.998221 
 127.177222 35.707222 280.890499 
 127.176111 35.707333 300.830615 
 127.176222 35.707333 297.760032 
 127.176333 35.707333 294.909918 
 127.176444 35.707333 292.282817 
 127.176667 35.707333 287.681524 
 127.176889 35.707333 283.941384 
 127.177000 35.707333 282.389201 
 127.177111 35.707333 281.048128 
 127.177222 35.707333 279.914353 
 127.176111 35.707444 300.140049 
 127.176222 35.707444 297.047364 
 127.176333 35.707444 294.174664 
 127.176444 35.707444 291.524529 
 127.176667 35.707444 286.875760 
 127.176889 35.707444 283.086299 
 127.177000 35.707444 281.508756 
 127.177111 35.707444 280.141886 
 127.177222 35.707444 278.981837 
 127.176111 35.707556 299.496478 
 127.176222 35.707556 296.381495 
 127.176333 35.707556 293.486016 
 127.176444 35.707556 290.812656 
 127.176667 35.707556 286.116037 
 127.176889 35.707556 282.276888 
 127.177000 35.707556 280.673805 
 127.177111 35.707556 279.280959 
 127.177222 35.707556 278.094460 
 127.176222 35.707556 296.381495 
 127.176333 35.707556 293.486016 
 127.176444 35.707556 290.812656 
 127.176556 35.707556 288.355332 
 127.176778 35.707556 284.089429 
 127.177000 35.707556 280.673805 
 127.177111 35.707556 279.280959 
 127.177222 35.707556 278.094460 
 127.177333 35.707556 277.114496 
 127.176222 35.707667 295.763238 
 127.176333 35.707667 292.844826 
 127.176444 35.707667 290.148093 
 127.176556 35.707667 287.666917 
 127.176778 35.707667 283.351956 
 127.177000 35.707667 279.885455 
 127.177111 35.707667 278.466500 
 127.177222 35.707667 277.253421 
 127.177333 35.707667 276.246446 
 127.176222 35.707778 295.190253 
 127.176333 35.707778 292.248678 
 127.176444 35.707778 289.528341 
 127.176556 35.707778 287.023084 
 127.176778 35.707778 282.658613 
 127.177000 35.707778 279.140784 
 127.177111 35.707778 277.695498 
 127.177222 35.707778 276.455616 
 127.177333 35.707778 275.421411 
 127.176222 35.707889 294.664301 
 127.176333 35.707889 291.699411 
 127.176444 35.707889 288.955321 
 127.176556 35.707889 286.425838 
 127.176778 35.707889 282.011572 
 127.177000 35.707889 278.442144 
 127.177111 35.707889 276.970395 
 127.177222 35.707889 275.703581 
 127.177333 35.707889 274.642019 
 127.176333 35.707889 291.699411 
 127.176444 35.707889 288.955321 
 127.176556 35.707889 286.425838 
 127.176667 35.707889 284.113073 
 127.176889 35.707889 280.122838 
 127.177111 35.707889 276.970395 
 127.177222 35.707889 275.703581 
 127.177333 35.707889 274.642019 
 127.177444 35.707889 273.782405 
 127.176333 35.708000 291.194928 
 127.176444 35.708000 288.426855 
 127.176556 35.708000 285.872917 
 127.176667 35.708000 283.535263 
 127.176889 35.708000 279.493877 
 127.177111 35.708000 276.288489 
 127.177222 35.708000 274.994522 
 127.177333 35.708000 273.905382 
 127.177444 35.708000 273.017725 
 127.176333 35.708111 290.736757 
 127.176444 35.708111 287.944553 
 127.176556 35.708111 285.366015 
 127.176667 35.708111 283.003330 
 127.176889 35.708111 278.910519 
 127.177111 35.708111 275.651921 
 127.177222 35.708111 274.330672 
 127.177333 35.708111 273.213830 
 127.177444 35.708111 272.298006 
 127.176333 35.708222 290.323115 
 127.176444 35.708222 287.506551 
 127.176556 35.708222 284.903183 
 127.176667 35.708222 282.515239 
 127.176889 35.708222 278.370551 
 127.177111 35.708222 275.058296 
 127.177222 35.708222 273.709543 
 127.177333 35.708222 272.564778 
 127.177444 35.708222 271.620569 
 127.176444 35.708222 287.506551 
 127.176556 35.708222 284.903183 
 127.176667 35.708222 282.515239 
 127.176778 35.708222 280.337154 
 127.177000 35.708222 276.610588 
 127.177222 35.708222 273.709543 
 127.177333 35.708222 272.564778 
 127.177444 35.708222 271.620569 
 127.177556 35.708222 270.876792 
 127.176444 35.708333 287.113515 
 127.176556 35.708333 284.485130 
 127.176667 35.708333 282.071743 
 127.176778 35.708333 279.867749 
 127.177000 35.708333 276.088055 
 127.177222 35.708333 273.132115 
 127.177333 35.708333 271.959254 
 127.177444 35.708333 270.986488 
 127.177556 35.708333 270.213741 
 127.176444 35.708444 286.765802 
 127.176556 35.708444 284.112257 
 127.176667 35.708444 281.673288 
 127.176778 35.708444 279.443247 
 127.177000 35.708444 275.610158 
 127.177222 35.708444 272.599067 
 127.177333 35.708444 271.397986 
 127.177444 35.708444 270.396544 
 127.177556 35.708444 269.594707 
 127.176556 35.708444 284.112257 
 127.176667 35.708444 281.673288 
 127.176778 35.708444 279.443247 
 127.176889 35.708444 277.423846 
 127.177111 35.708444 274.003304 
 127.177333 35.708444 271.397986 
 127.177444 35.708444 270.396544 
 127.177556 35.708444 269.594707 
 127.177667 35.708444 268.989647 
 127.176556 35.708556 283.783082 
 127.176667 35.708556 281.318301 
 127.176778 35.708556 279.061988 
 127.176889 35.708556 277.015894 
 127.177111 35.708556 273.540631 
 127.177333 35.708556 270.878845 
 127.177444 35.708556 269.848506 
 127.177556 35.708556 269.017362 
 127.177667 35.708556 268.382539 
 127.176556 35.708667 283.498538 
 127.176667 35.708667 281.007806 
 127.176778 35.708667 278.725083 
 127.176889 35.708667 276.652163 
 127.177111 35.708667 273.121920 
 127.177333 35.708667 270.403419 
 127.177444 35.708667 269.344062 
 127.177556 35.708667 268.483493 
 127.177667 35.708667 267.818793 
 127.176556 35.708778 283.257446 
 127.176667 35.708778 280.740537 
 127.176778 35.708778 278.431177 
 127.176889 35.708778 276.331205 
 127.177111 35.708778 272.745534 
 127.177333 35.708778 269.969874 
 127.177444 35.708778 268.881280 
 127.177556 35.708778 267.991069 
 127.177667 35.708778 267.296275 
 127.176667 35.708778 280.740537 
 127.176778 35.708778 278.431177 
 127.176889 35.708778 276.331205 
 127.177000 35.708778 274.435574 
 127.177222 35.708778 271.256742 
 127.177444 35.708778 268.881280 
 127.177556 35.708778 267.991069 
 127.177667 35.708778 267.296275 
 127.177778 35.708778 266.796449 
 127.176667 35.708889 280.517216 
 127.176778 35.708889 278.181085 
 127.176889 35.708889 276.053929 
 127.177000 35.708889 274.130660 
 127.177222 35.708889 270.895282 
 127.177444 35.708889 268.461558 
 127.177556 35.708889 267.541588 
 127.177667 35.708889 266.816585 
 127.177778 35.708889 266.286152 
 127.176667 35.709000 280.336881 
 127.176778 35.709000 277.973751 
 127.176889 35.709000 275.819185 
 127.177000 35.709000 273.868053 
 127.177222 35.709000 270.575684 
 127.177444 35.709000 268.083258 
 127.177556 35.709000 267.133310 
 127.177667 35.709000 266.377882 
 127.177778 35.709000 265.816624 
 127.176667 35.709111 280.199959 
 127.176778 35.709111 277.809696 
 127.176889 35.709111 275.627589 
 127.177000 35.709111 273.648466 
 127.177222 35.709111 270.298855 
 127.177444 35.709111 267.747489 
 127.177556 35.709111 266.767448 
 127.177667 35.709111 265.981483 
 127.177778 35.709111 265.389291 
 127.176778 35.709111 277.809696 
 127.176889 35.709111 275.627589 
 127.177000 35.709111 273.648466 
 127.177111 35.709111 271.873712 
 127.177333 35.709111 268.924708 
 127.177556 35.709111 266.767448 
 127.177667 35.709111 265.981483 
 127.177778 35.709111 265.389291 
 127.177889 35.709111 264.988437 
 127.176778 35.709222 277.688165 
 127.176889 35.709222 275.478291 
 127.177000 35.709222 273.470952 
 127.177111 35.709222 271.667578 
 127.177333 35.709222 268.660039 
 127.177556 35.709222 266.442554 
 127.177667 35.709222 265.625833 
 127.177778 35.709222 265.002490 
 127.177889 35.709222 264.570044 
 127.176778 35.709333 277.609285 
 127.176889 35.709333 275.371466 
 127.177000 35.709333 273.335734 
 127.177111 35.709333 271.503566 
 127.177333 35.709333 268.437149 
 127.177556 35.709333 266.159104 
 127.177667 35.709333 265.311463 
 127.177778 35.709333 264.656807 
 127.177889 35.709333 264.192607 
 127.176778 35.709444 277.572896 
 127.176889 35.709444 275.307001 
 127.177000 35.709444 273.242750 
 127.177111 35.709444 271.381664 
 127.177333 35.709444 268.256128 
 127.177556 35.709444 265.917292 
 127.177667 35.709444 265.038620 
 127.177778 35.709444 264.352543 
 127.177889 35.709444 263.856483 
 127.176889 35.709444 275.307001 
 127.177000 35.709444 273.242750 
 127.177111 35.709444 271.381664 
 127.177222 35.709444 269.719138 
 127.177444 35.709444 266.988714 
 127.177667 35.709444 265.038620 
 127.177778 35.709444 264.352543 
 127.177889 35.709444 263.856483 
 127.178000 35.709444 263.549748 
 127.176889 35.709556 275.284488 
 127.177000 35.709556 273.191492 
 127.177111 35.709556 271.301263 
 127.177222 35.709556 269.609154 
 127.177444 35.709556 266.818332 
 127.177667 35.709556 264.806179 
 127.177778 35.709556 264.088464 
 127.177889 35.709556 263.560330 
 127.178000 35.709556 263.221134 
 127.176889 35.709667 275.303818 
 127.177000 35.709667 273.181951 
 127.177111 35.709667 271.262457 
 127.177222 35.709667 269.540643 
 127.177444 35.709667 266.689192 
 127.177667 35.709667 264.614756 
 127.177778 35.709667 263.865297 
 127.177889 35.709667 263.304983 
 127.178000 35.709667 262.933224 
 127.176889 35.709778 275.364874 
 127.177000 35.709778 273.213911 
 127.177111 35.709778 271.264928 
 127.177222 35.709778 269.513187 
 127.177444 35.709778 266.600663 
 127.177667 35.709778 264.463510 
 127.177778 35.709778 263.682089 
 127.177889 35.709778 263.089380 
 127.178000 35.709778 262.684845 
 127.177000 35.709778 273.213911 
 127.177111 35.709778 271.264928 
 127.177222 35.709778 269.513187 
 127.177333 35.709778 267.959784 
 127.177556 35.709778 265.436367 
 127.177778 35.709778 263.682089 
 127.177889 35.709778 263.089380 
 127.178000 35.709778 262.684845 
 127.178111 35.709778 262.466411 
 127.177000 35.709889 273.287080 
 127.177111 35.709889 271.308486 
 127.177222 35.709889 269.526698 
 127.177333 35.709889 267.942861 
 127.177556 35.709889 265.357322 
 127.177778 35.709889 263.539290 
 127.177889 35.709889 262.914083 
 127.178000 35.709889 262.476671 
 127.178111 35.709889 262.224929 
 127.177000 35.710000 273.401528 
 127.177111 35.710000 271.393099 
 127.177222 35.710000 269.581041 
 127.177333 35.710000 267.966548 
 127.177556 35.710000 265.318448 
 127.177778 35.710000 263.436229 
 127.177889 35.710000 262.778308 
 127.178000 35.710000 262.307804 
 127.178111 35.710000 262.022542 
 127.177000 35.710111 273.556984 
 127.177111 35.710111 271.518548 
 127.177222 35.710111 269.676049 
 127.177333 35.710111 268.030732 
 127.177556 35.710111 265.319739 
 127.177778 35.710111 263.373008 
 127.177889 35.710111 262.682214 
 127.178000 35.710111 262.178461 
 127.178111 35.710111 261.859523 
 127.177111 35.710111 271.518548 
 127.177222 35.710111 269.676049 
 127.177333 35.710111 268.030732 
 127.177444 35.710111 266.578398 
 127.177667 35.710111 264.251226 
 127.177889 35.710111 262.682214 
 127.178000 35.710111 262.178461 
 127.178111 35.710111 261.859523 
 127.178222 35.710111 261.724497 
 127.177111 35.710222 271.684333 
 127.177222 35.710222 269.811276 
 127.177333 35.710222 268.135019 
 127.177444 35.710222 266.651316 
 127.177667 35.710222 264.260223 
 127.177889 35.710222 262.625685 
 127.178000 35.710222 262.088584 
 127.178111 35.710222 261.735874 
 127.178222 35.710222 261.566705 
 127.177111 35.710333 271.890850 
 127.177222 35.710333 269.987011 
 127.177333 35.710333 268.279593 
 127.177444 35.710333 266.764301 
 127.177667 35.710333 264.308849 
 127.177889 35.710333 262.608354 
 127.178000 35.710333 262.037690 
 127.178111 35.710333 261.650994 
 127.178222 35.710333 261.447470 
 127.177111 35.710444 272.137212 
 127.177222 35.710444 270.202475 
 127.177333 35.710444 268.463781 
 127.177444 35.710444 266.916788 
 127.177667 35.710444 264.396763 
 127.177889 35.710444 262.630105 
 127.178000 35.710444 262.025779 
 127.178111 35.710444 261.605002 
 127.178222 35.710444 261.367030 
 127.177222 35.710444 270.202475 
 127.177333 35.710444 268.463781 
 127.177444 35.710444 266.916788 
 127.177556 35.710444 265.562341 
 127.177778 35.710444 263.420358 
 127.178000 35.710444 262.025779 
 127.178111 35.710444 261.605002 
 127.178222 35.710444 261.367030 
 127.178333 35.710444 261.310118 
 127.177222 35.710556 270.458235 
 127.177333 35.710556 268.688043 
 127.177444 35.710556 267.109130 
 127.177556 35.710556 265.722389 
 127.177778 35.710556 263.514602 
 127.178000 35.710556 262.052639 
 127.178111 35.710556 261.597566 
 127.178222 35.710556 261.324935 
 127.178333 35.710556 261.232945 
 127.177222 35.710667 270.753240 
 127.177333 35.710667 268.951438 
 127.177444 35.710667 267.340493 
 127.177556 35.710667 265.921349 
 127.177778 35.710667 263.647550 
 127.178000 35.710667 262.118006 
 127.178111 35.710667 261.628543 
 127.178222 35.710667 261.321159 
 127.178333 35.710667 261.194002 
 127.177222 35.710778 271.088334 
 127.177333 35.710778 269.254700 
 127.177444 35.710778 267.611502 
 127.177556 35.710778 266.159737 
 127.177778 35.710778 263.819491 
 127.178000 35.710778 262.221935 
 127.178111 35.710778 261.697869 
 127.178222 35.710778 261.355521 
 127.178333 35.710778 261.192984 
 127.177333 35.710778 269.254700 
 127.177444 35.710778 267.611502 
 127.177556 35.710778 266.159737 
 127.177667 35.710778 264.895579 
 127.177889 35.710778 262.928297 
 127.178111 35.710778 261.697869 
 127.178222 35.710778 261.355521 
 127.178333 35.710778 261.192984 
 127.178444 35.710778 261.209174 
 127.177333 35.710889 269.596618 
 127.177444 35.710889 267.921057 
 127.177556 35.710889 266.436564 
 127.177667 35.710889 265.139261 
 127.177889 35.710889 263.104547 
 127.178111 35.710889 261.805137 
 127.178222 35.710889 261.427734 
 127.178333 35.710889 261.229729 
 127.178444 35.710889 261.210095 
 127.177333 35.711000 269.978200 
 127.177444 35.711000 268.270056 
 127.177556 35.711000 266.752615 
 127.177667 35.711000 265.421948 
 127.177889 35.711000 263.319370 
 127.178111 35.711000 261.950551 
 127.178222 35.711000 261.537879 
 127.178333 35.711000 261.304196 
 127.178444 35.711000 261.248529 
 127.177444 35.711111 268.657832 
 127.177556 35.711111 267.107280 
 127.177667 35.711111 265.743089 
 127.177778 35.711111 264.565883 
 127.178000 35.711111 262.762531 
 127.178222 35.711111 261.685700 
 127.178333 35.711111 261.416188 
 127.178444 35.711111 261.324341 
 127.178556 35.711111 261.408706 
 127.177444 35.711222 269.083452 
 127.177556 35.711222 267.499684 
 127.177667 35.711222 266.101866 
 127.177778 35.711222 264.890675 
 127.178000 35.711222 263.018180 
 127.178222 35.711222 261.870682 
 127.178333 35.711222 261.565253 
 127.178444 35.711222 261.437140 
 127.178556 35.711222 261.484834 
 127.177444 35.711333 269.548219 
 127.177556 35.711333 267.931015 
 127.177667 35.711333 266.499351 
 127.177778 35.711333 265.253958 
 127.178000 35.711333 263.311888 
 127.178222 35.711333 262.093298 
 127.178333 35.711333 261.751742 
 127.178444 35.711333 261.587153 
 127.178556 35.711333 261.597967 
 127.177556 35.711333 267.931015 
 127.177667 35.711333 266.499351 
 127.177778 35.711333 265.253958 
 127.177889 35.711333 264.191400 
 127.178111 35.711333 262.612620 
 127.178333 35.711333 261.751742 
 127.178444 35.711333 261.587153 
 127.178556 35.711333 261.597967 
 127.178667 35.711333 261.782891 
 127.177556 35.711444 268.399627 
 127.177667 35.711444 266.934015 
 127.177778 35.711444 265.654322 
 127.177889 35.711444 264.557056 
 127.178111 35.711444 262.907755 
 127.178333 35.711444 261.974852 
 127.178444 35.711444 261.773703 
 127.178556 35.711444 261.747555 
 127.178667 35.711444 261.895175 
 127.177556 35.711556 268.906973 
 127.177667 35.711556 267.407194 
 127.177778 35.711556 266.092982 
 127.177889 35.711556 264.960793 
 127.178111 35.711556 263.240543 
 127.178333 35.711556 262.235191 
 127.178444 35.711556 261.997273 
 127.178556 35.711556 261.933955 
 127.178667 35.711556 262.044062 
 127.177556 35.711667 269.451148 
 127.177667 35.711667 267.917102 
 127.177778 35.711667 266.568273 
 127.177889 35.711667 265.401065 
 127.178111 35.711667 263.609682 
 127.178333 35.711667 262.531707 
 127.178444 35.711667 262.256936 
 127.178556 35.711667 262.156366 
 127.178667 35.711667 262.228883 
 127.177667 35.711667 267.917102 
 127.177778 35.711667 266.568273 
 127.177889 35.711667 265.401065 
 127.178000 35.711667 264.415857 
 127.178222 35.711667 262.982414 
 127.178444 35.711667 262.256936 
 127.178556 35.711667 262.156366 
 127.178667 35.711667 262.228883 
 127.178778 35.711667 262.473354 
 127.177667 35.711778 268.465336 
 127.177778 35.711778 267.081673 
 127.177889 35.711778 265.879229 
 127.178000 35.711778 264.858440 
 127.178222 35.711778 263.352692 
 127.178444 35.711778 262.553428 
 127.178556 35.711778 262.415398 
 127.178667 35.711778 262.450117 
 127.178778 35.711778 262.656394 
 127.177667 35.711889 269.050892 
 127.177778 35.711889 267.632237 
 127.177889 35.711889 266.394401 
 127.178000 35.711889 265.337877 
 127.178222 35.711889 263.759523 
 127.178444 35.711889 262.886179 
 127.178556 35.711889 262.710544 
 127.178667 35.711889 262.707322 
 127.178778 35.711889 262.875264 
 127.177667 35.712000 269.672512 
 127.177778 35.712000 268.218769 
 127.177889 35.712000 266.945447 
 127.178000 35.712000 265.853096 
 127.178222 35.712000 264.201958 
 127.178444 35.712000 263.254368 
 127.178556 35.712000 263.041049 
 127.178667 35.712000 262.999809 
 127.178778 35.712000 263.129341 
 127.177778 35.712000 268.218769 
 127.177889 35.712000 266.945447 
 127.178000 35.712000 265.853096 
 127.178111 35.712000 264.938585 
 127.178333 35.712000 263.640702 
 127.178556 35.712000 263.041049 
 127.178667 35.712000 262.999809 
 127.178778 35.712000 263.129341 
 127.178889 35.712000 263.428532 
 127.177778 35.712111 268.843132 
 127.177889 35.712111 267.534108 
 127.178000 35.712111 266.405716 
 127.178111 35.712111 265.454768 
 127.178333 35.712111 264.082945 
 127.178556 35.712111 263.407897 
 127.178667 35.712111 263.328432 
 127.178778 35.712111 263.419348 
 127.178889 35.712111 263.679562 
 127.177778 35.712222 269.503029 
 127.177889 35.712222 268.158210 
 127.178000 35.712222 266.993684 
 127.178111 35.712222 266.006211 
 127.178333 35.712222 264.560279 
 127.178556 35.712222 263.809676 
 127.178667 35.712222 263.691910 
 127.178778 35.712222 263.744136 
 127.178889 35.712222 263.965303 
 127.177778 35.712333 270.200579 
 127.177889 35.712333 268.819747 
 127.178000 35.712333 267.618874 
 127.178111 35.712333 266.594662 
 127.178333 35.712333 265.074195 
 127.178556 35.712333 264.247619 
 127.178667 35.712333 264.091344 
 127.178778 35.712333 264.104674 
 127.178889 35.712333 264.286587 
 127.177889 35.712333 268.819747 
 127.178000 35.712333 267.618874 
 127.178111 35.712333 266.594662 
 127.178222 35.712333 265.747331 
 127.178444 35.712333 264.574985 
 127.178667 35.712333 264.091344 
 127.178778 35.712333 264.104674 
 127.178889 35.712333 264.286587 
 127.179000 35.712333 264.635562 
 127.177889 35.712444 269.516298 
 127.178000 35.712444 268.278987 
 127.178111 35.712444 267.217948 
 127.178222 35.712444 266.333460 
 127.178444 35.712444 265.085697 
 127.178667 35.712444 264.525213 
 127.178778 35.712444 264.499573 
 127.178889 35.712444 264.642163 
 127.179000 35.712444 264.951493 
 127.177889 35.712556 270.250110 
 127.178000 35.712556 268.976146 
 127.178111 35.712556 267.878066 
 127.178222 35.712556 266.956208 
 127.178444 35.712556 265.632606 
 127.178667 35.712556 264.994862 
 127.178778 35.712556 264.930046 
 127.178889 35.712556 265.033107 
 127.179000 35.712556 265.302587 
 127.177889 35.712667 271.019867 
 127.178000 35.712667 269.709099 
 127.178111 35.712667 268.573827 
 127.178222 35.712667 267.614450 
 127.178444 35.712667 266.214717 
 127.178667 35.712667 265.499428 
 127.178778 35.712667 265.395297 
 127.178889 35.712667 265.458691 
 127.179000 35.712667 265.688186 
 127.178000 35.712667 269.709099 
 127.178111 35.712667 268.573827 
 127.178222 35.712667 267.614450 
 127.178333 35.712667 266.828111 
 127.178556 35.712667 265.772013 
 127.178778 35.712667 265.395297 
 127.178889 35.712667 265.458691 
 127.179000 35.712667 265.688186 
 127.179111 35.712667 266.082991 
 127.178000 35.712778 270.476346 
 127.178111 35.712778 269.303797 
 127.178222 35.712778 268.306818 
 127.178333 35.712778 267.482494 
 127.178556 35.712778 266.349402 
 127.178778 35.712778 265.894291 
 127.178889 35.712778 265.917949 
 127.179000 35.712778 266.107392 
 127.179111 35.712778 266.461767 
 127.178000 35.712889 271.280386 
 127.178111 35.712889 270.070344 
 127.178222 35.712889 269.035550 
 127.178333 35.712889 268.173029 
 127.178556 35.712889 266.962523 
 127.178778 35.712889 266.428602 
 127.178889 35.712889 266.412319 
 127.179000 35.712889 266.561506 
 127.179111 35.712889 266.875247 
 127.178111 35.712889 270.070344 
 127.178222 35.712889 269.035550 
 127.178333 35.712889 268.173029 
 127.178444 35.712889 267.482812 
 127.178667 35.712889 266.611715 
 127.178889 35.712889 266.412319 
 127.179000 35.712889 266.561506 
 127.179111 35.712889 266.875247 
 127.179222 35.712889 267.351933 
 127.178111 35.713000 270.870691 
 127.178222 35.713000 269.797999 
 127.178333 35.713000 268.897201 
 127.178444 35.713000 268.168389 
 127.178667 35.713000 267.219031 
 127.178889 35.713000 266.939960 
 127.179000 35.713000 267.048825 
 127.179111 35.713000 267.321869 
 127.179222 35.713000 267.757548 
 127.178111 35.713111 271.707450 
 127.178222 35.713111 270.596647 
 127.178333 35.713111 269.657361 
 127.178444 35.713111 268.889743 
 127.178667 35.713111 267.861706 
 127.178889 35.713111 267.502547 
 127.179000 35.713111 267.570885 
 127.179111 35.713111 267.803030 
 127.179222 35.713111 268.197499 
 127.178111 35.713222 272.577605 
 127.178222 35.713222 271.428609 
 127.178333 35.713222 270.450754 
 127.178444 35.713222 269.644254 
 127.178667 35.713222 268.537392 
 127.178889 35.713222 268.098008 
 127.179000 35.713222 268.125754 
 127.179111 35.713222 268.316936 
 127.179222 35.713222 268.670136 
 127.178222 35.713222 271.428609 
 127.178333 35.713222 270.450754 
 127.178444 35.713222 269.644254 
 127.178556 35.713222 269.006554 
 127.178778 35.713222 268.234800 
 127.179000 35.713222 268.125754 
 127.179111 35.713222 268.316936 
 127.179222 35.713222 268.670136 
 127.179333 35.713222 269.184820 
 127.178222 35.713333 272.296610 
 127.178333 35.713333 271.279975 
 127.178444 35.713333 270.434381 
 127.178556 35.713333 269.757214 
 127.178778 35.713333 268.905535 
 127.179000 35.713333 268.715204 
 127.179111 35.713333 268.865219 
 127.179222 35.713333 269.176948 
 127.179333 35.713333 269.649792 
 127.178222 35.713444 273.197528 
 127.178333 35.713444 272.142034 
 127.178444 35.713444 271.257271 
 127.178556 35.713444 270.540564 
 127.178778 35.713444 269.608818 
 127.179000 35.713444 269.337071 
 127.179111 35.713444 269.445858 
 127.179222 35.713444 269.716056 
 127.179333 35.713444 270.147003 
 127.178222 35.713556 274.134328 
 127.178333 35.713556 273.039763 
 127.178444 35.713556 272.115620 
 127.178556 35.713556 271.359162 
 127.178778 35.713556 270.346935 
 127.179000 35.713556 269.993361 
 127.179111 35.713556 270.060716 
 127.179222 35.713556 270.289182 
 127.179333 35.713556 270.678029 
 127.178333 35.713556 273.039763 
 127.178444 35.713556 272.115620 
 127.178556 35.713556 271.359162 
 127.178667 35.713556 270.770318 
 127.178889 35.713556 270.088336 
 127.179111 35.713556 270.060716 
 127.179222 35.713556 270.289182 
 127.179333 35.713556 270.678029 
 127.179444 35.713556 271.225592 
 127.178333 35.713667 273.971571 
 127.178444 35.713667 273.007904 
 127.178556 35.713667 272.211555 
 127.178667 35.713667 271.582515 
 127.178889 35.713667 270.819072 
 127.179111 35.713667 270.708688 
 127.179222 35.713667 270.895290 
 127.179333 35.713667 271.241910 
 127.179444 35.713667 271.746948 
 127.178333 35.713778 274.935635 
 127.178444 35.713778 273.932371 
 127.178556 35.713778 273.096057 
 127.178667 35.713778 272.426751 
 127.178889 35.713778 271.581714 
 127.179111 35.713778 271.388443 
 127.179222 35.713778 271.533123 
 127.179333 35.713778 271.837459 
 127.179444 35.713778 272.299918 
 127.178333 35.713889 275.935142 
 127.178444 35.713889 274.892068 
 127.178556 35.713889 274.015581 
 127.178667 35.713889 273.305799 
 127.178889 35.713889 272.378754 
 127.179111 35.713889 272.102187 
 127.179222 35.713889 272.204743 
 127.179333 35.713889 272.466595 
 127.179444 35.713889 272.886276 
 127.178444 35.713889 274.892068 
 127.178556 35.713889 274.015581 
 127.178667 35.713889 273.305799 
 127.178778 35.713889 272.760383 
 127.179000 35.713889 272.159851 
 127.179222 35.713889 272.204743 
 127.179333 35.713889 272.466595 
 127.179444 35.713889 272.886276 
 127.179556 35.713889 273.463416 
 127.178444 35.714000 275.883567 
 127.178556 35.714000 274.966834 
 127.178667 35.714000 274.216508 
 127.178778 35.714000 273.630187 
 127.179000 35.714000 272.946891 
 127.179222 35.714000 272.907714 
 127.179333 35.714000 273.127025 
 127.179444 35.714000 273.503875 
 127.179556 35.714000 274.037827 
 127.178444 35.714111 276.910150 
 127.178556 35.714111 275.952962 
 127.178667 35.714111 275.161883 
 127.178778 35.714111 274.534449 
 127.179000 35.714111 273.767979 
 127.179222 35.714111 273.644325 
 127.179333 35.714111 273.820895 
 127.179444 35.714111 274.154714 
 127.179556 35.714111 274.645279 
 127.178556 35.714111 275.952962 
 127.178667 35.714111 275.161883 
 127.178778 35.714111 274.534449 
 127.178889 35.714111 274.070146 
 127.179111 35.714111 273.626335 
 127.179333 35.714111 273.820895 
 127.179444 35.714111 274.154714 
 127.179556 35.714111 274.645279 
 127.179667 35.714111 275.290823 
 127.178556 35.714222 276.970446 
 127.178667 35.714222 276.138547 
 127.178778 35.714222 275.469934 
 127.178889 35.714222 274.964127 
 127.179111 35.714222 274.436369 
 127.179333 35.714222 274.545692 
 127.179444 35.714222 274.836427 
 127.179556 35.714222 275.283555 
 127.179667 35.714222 275.885377 
 127.178556 35.714333 278.022663 
 127.178667 35.714333 277.149734 
 127.178778 35.714333 276.439734 
 127.178889 35.714333 275.892216 
 127.179111 35.714333 275.280102 
 127.179333 35.714333 275.303784 
 127.179444 35.714333 275.551237 
 127.179556 35.714333 275.954728 
 127.179667 35.714333 276.512630 
 127.178556 35.714445 279.107762 
 127.178667 35.714445 278.193664 
 127.178778 35.714445 277.442141 
 127.178889 35.714445 276.852778 
 127.179111 35.714445 276.156043 
 127.179333 35.714445 276.093827 
 127.179444 35.714445 276.297871 
 127.179556 35.714445 276.657602 
 127.179667 35.714445 277.171461 
 127.178667 35.714445 278.193664 
 127.178778 35.714445 277.442141 
 127.178889 35.714445 276.852778 
 127.179000 35.714445 276.424682 
 127.179222 35.714445 276.046176 
 127.179444 35.714445 276.297871 
 127.179556 35.714445 276.657602 
 127.179667 35.714445 277.171461 
 127.179778 35.714445 277.839286 
 127.178667 35.714556 279.268336 
 127.178778 35.714556 278.475224 
 127.178889 35.714556 277.843953 
 127.179000 35.714556 277.373663 
 127.179222 35.714556 276.909785 
 127.179444 35.714556 277.074840 
 127.179556 35.714556 277.390762 
 127.179667 35.714556 277.860533 
 127.179778 35.714556 278.483921 
 127.178667 35.714667 280.377324 
 127.178778 35.714667 279.542416 
 127.178889 35.714667 278.869030 
 127.179000 35.714667 278.356342 
 127.179222 35.714667 277.806683 
 127.179444 35.714667 277.884698 
 127.179556 35.714667 278.156611 
 127.179667 35.714667 278.582095 
 127.179778 35.714667 279.160849 
 127.178667 35.714778 281.516695 
 127.178778 35.714778 280.639927 
 127.178889 35.714778 279.924365 
 127.179000 35.714778 279.369218 
 127.179222 35.714778 278.733668 
 127.179444 35.714778 278.724539 
 127.179556 35.714778 278.952396 
 127.179667 35.714778 279.333548 
 127.179778 35.714778 279.867625 
 127.178778 35.714778 280.639927 
 127.178889 35.714778 279.924365 
 127.179000 35.714778 279.369218 
 127.179111 35.714778 278.972480 
 127.179333 35.714778 278.651327 
 127.179556 35.714778 278.952396 
 127.179667 35.714778 279.333548 
 127.179778 35.714778 279.867625 
 127.179889 35.714778 280.552853 
 127.178778 35.714889 281.771415 
 127.178889 35.714889 281.013470 
 127.179000 35.714889 280.415659 
 127.179111 35.714889 279.975911 
 127.179333 35.714889 279.567834 
 127.179556 35.714889 279.780737 
 127.179667 35.714889 280.117358 
 127.179778 35.714889 280.606561 
 127.179889 35.714889 281.246642 
 127.178778 35.715000 282.932870 
 127.178889 35.715000 282.132482 
 127.179000 35.715000 281.491949 
 127.179111 35.715000 281.009134 
 127.179333 35.715000 280.514028 
 127.179556 35.715000 280.638667 
 127.179667 35.715000 280.930713 
 127.179778 35.715000 281.374999 
 127.179889 35.715000 281.969893 
 127.178889 35.715000 282.132482 
 127.179000 35.715000 281.491949 
 127.179111 35.715000 281.009134 
 127.179222 35.715000 280.683689 
 127.179444 35.715000 280.499369 
 127.179667 35.715000 280.930713 
 127.179778 35.715000 281.374999 
 127.179889 35.715000 281.969893 
 127.180000 35.715000 282.715418 
 127.178889 35.715111 283.285134 
 127.179000 35.715111 282.601674 
 127.179111 35.715111 282.075588 
 127.179222 35.715111 281.706597 
 127.179444 35.715111 281.434227 
 127.179667 35.715111 281.776296 
 127.179778 35.715111 282.175468 
 127.179889 35.715111 282.724979 
 127.180000 35.715111 283.424781 
 127.178889 35.715222 284.469412 
 127.179000 35.715222 283.742891 
 127.179111 35.715222 283.173404 
 127.179222 35.715222 282.760740 
 127.179444 35.715222 282.400069 
 127.179667 35.715222 282.652617 
 127.179778 35.715222 283.006556 
 127.179889 35.715222 283.510566 
 127.180000 35.715222 284.164529 
 127.178889 35.715333 285.683082 
 127.179000 35.715333 284.913444 
 127.179111 35.715333 284.300501 
 127.179222 35.715333 283.844109 
 127.179444 35.715333 283.395039 
 127.179667 35.715333 283.557976 
 127.179778 35.715333 283.866640 
 127.179889 35.715333 284.325110 
 127.180000 35.715333 284.933198 
 127.179000 35.715333 284.913444 
 127.179111 35.715333 284.300501 
 127.179222 35.715333 283.844109 
 127.179333 35.715333 283.542479 
 127.179556 35.715333 283.400537 
 127.179778 35.715333 283.866640 
 127.179889 35.715333 284.325110 
 127.180000 35.715333 284.933198 
 127.180111 35.715333 285.689070 
 127.179000 35.715445 286.117247 
 127.179111 35.715445 285.460643 
 127.179222 35.715445 284.960321 
 127.179333 35.715445 284.614423 
 127.179556 35.715445 284.383075 
 127.179778 35.715445 284.758568 
 127.179889 35.715445 285.171302 
 127.180000 35.715445 285.733319 
 127.180111 35.715445 286.442859 
 127.179000 35.715556 287.350050 
 127.179111 35.715556 286.649730 
 127.179222 35.715556 286.105426 
 127.179333 35.715556 285.715211 
 127.179556 35.715556 285.394363 
 127.179778 35.715556 285.679163 
 127.179889 35.715556 286.046123 
 127.180000 35.715556 286.562033 
 127.180111 35.715556 287.225206 
 127.179000 35.715667 288.615985 
 127.179111 35.715667 287.871745 
 127.179222 35.715667 287.283255 
 127.179333 35.715667 286.848520 
 127.179556 35.715667 286.437772 
 127.179778 35.715667 286.631483 
 127.179889 35.715667 286.952472 
 127.180000 35.715667 287.422080 
 127.180111 35.715667 288.038692 
 127.179111 35.715667 287.871745 
 127.179222 35.715667 287.283255 
 127.179333 35.715667 286.848520 
 127.179444 35.715667 286.567178 
 127.179667 35.715667 286.459516 
 127.179889 35.715667 286.952472 
 127.180000 35.715667 287.422080 
 127.180111 35.715667 288.038692 
 127.180222 35.715667 288.802426 
 127.179111 35.715778 289.122376 
 127.179222 35.715778 288.489649 
 127.179333 35.715778 288.010345 
 127.179444 35.715778 287.684173 
 127.179667 35.715778 287.485928 
 127.179889 35.715778 287.887125 
 127.180000 35.715778 288.310395 
 127.180111 35.715778 288.880414 
 127.180222 35.715778 289.597226 
 127.179111 35.715889 290.405820 
 127.179222 35.715889 289.728652 
 127.179333 35.715889 289.204577 
 127.179444 35.715889 288.833374 
 127.179667 35.715889 288.544148 
 127.179889 35.715889 288.853192 
 127.180000 35.715889 289.229929 
 127.180111 35.715889 289.753161 
 127.180222 35.715889 290.422857 
 127.179222 35.715889 289.728652 
 127.179333 35.715889 289.204577 
 127.179444 35.715889 288.833374 
 127.179556 35.715889 288.613445 
 127.179778 35.715889 288.624417 
 127.180000 35.715889 289.229929 
 127.180111 35.715889 289.753161 
 127.180222 35.715889 290.422857 
 127.180333 35.715889 291.237147 
 127.179222 35.716000 290.995898 
 127.179333 35.716000 290.427004 
 127.179444 35.716000 290.010723 
 127.179556 35.716000 289.745389 
 127.179778 35.716000 289.664712 
 127.180000 35.716000 290.177414 
 127.180111 35.716000 290.653825 
 127.180222 35.716000 291.276376 
 127.180333 35.716000 292.043270 
 127.179222 35.716111 292.295643 
 127.179333 35.716111 291.681726 
 127.179444 35.716111 291.220167 
 127.179556 35.716111 290.909227 
 127.179778 35.716111 290.736505 
 127.180000 35.716111 291.156006 
 127.180111 35.716111 291.585403 
 127.180222 35.716111 292.160616 
 127.180333 35.716111 292.879921 
 127.179222 35.716222 293.625626 
 127.179333 35.716222 292.966561 
 127.179444 35.716222 292.459599 
 127.179556 35.716222 292.102933 
 127.179778 35.716222 291.837926 
 127.180000 35.716222 292.163994 
 127.180111 35.716222 292.546264 
 127.180222 35.716222 293.074026 
 127.180333 35.716222 293.745634 
 127.179333 35.716222 292.966561 
 127.179444 35.716222 292.459599 
 127.179556 35.716222 292.102933 
 127.179667 35.716222 291.896136 
 127.179889 35.716222 291.927467 
 127.180111 35.716222 292.546264 
 127.180222 35.716222 293.074026 
 127.180333 35.716222 293.745634 
 127.180444 35.716222 294.561347 
 127.179333 35.716333 294.279118 
 127.179444 35.716333 293.726709 
 127.179556 35.716333 293.324273 
 127.179667 35.716333 293.071455 
 127.179889 35.716333 293.009853 
 127.180111 35.716333 293.534578 
 127.180222 35.716333 294.014861 
 127.180333 35.716333 294.638743 
 127.180444 35.716333 295.406411 
 127.179333 35.716444 295.623813 
 127.179444 35.716444 295.025755 
 127.179556 35.716444 294.577348 
 127.179667 35.716444 294.278312 
 127.179889 35.716444 294.123381 
 127.180111 35.716444 294.553645 
 127.180222 35.716444 294.986255 
 127.180333 35.716444 295.562221 
 127.180444 35.716444 296.281653 
 127.179333 35.716556 296.995922 
 127.179444 35.716556 296.352172 
 127.179556 35.716556 295.857753 
 127.179667 35.716556 295.512457 
 127.179889 35.716556 295.264125 
 127.180111 35.716556 295.599863 
 127.180222 35.716556 295.984771 
 127.180333 35.716556 296.512793 
 127.180444 35.716556 297.183965 
 127.179444 35.716556 296.352172 
 127.179556 35.716556 295.857753 
 127.179667 35.716556 295.512457 
 127.179778 35.716556 295.314787 
 127.180000 35.716556 295.359491 
 127.180222 35.716556 295.984771 
 127.180333 35.716556 296.512793 
 127.180444 35.716556 297.183965 
 127.180556 35.716556 297.996470 
 127.179444 35.716667 297.710425 
 127.179556 35.716667 297.169792 
 127.179667 35.716667 296.778038 
 127.179778 35.716667 296.533592 
 127.180000 35.716667 296.483940 
 127.180222 35.716667 297.013746 
 127.180333 35.716667 297.493632 
 127.180444 35.716667 298.116353 
 127.180556 35.716667 298.880168 
 127.179444 35.716778 299.095746 
 127.179556 35.716778 298.508859 
 127.179667 35.716778 298.070607 
 127.179778 35.716778 297.779348 
 127.180000 35.716778 297.635272 
 127.180222 35.716778 298.069545 
 127.180333 35.716778 298.501270 
 127.180444 35.716778 299.075515 
 127.180556 35.716778 299.790618 
 127.179556 35.716778 298.508859 
 127.179667 35.716778 298.070607 
 127.179778 35.716778 297.779348 
 127.179889 35.716778 297.634612 
 127.180111 35.716778 297.780455 
 127.180333 35.716778 298.501270 
 127.180444 35.716778 299.075515 
 127.180556 35.716778 299.790618 
 127.180667 35.716778 300.646961 
 127.179556 35.716889 299.879465 
 127.179667 35.716889 299.394516 
 127.179778 35.716889 299.056246 
 127.179889 35.716889 298.864258 
 127.180111 35.716889 298.914732 
 127.180333 35.716889 299.539076 
 127.180444 35.716889 300.064656 
 127.180556 35.716889 300.730857 
 127.180667 35.716889 301.537987 
 127.179556 35.717000 301.279233 
 127.179667 35.717000 300.747468 
 127.179778 35.717000 300.362069 
 127.179889 35.717000 300.122714 
 127.180111 35.717000 300.077592 
 127.180333 35.717000 300.605246 
 127.180444 35.717000 301.082052 
 127.180556 35.717000 301.699246 
 127.180667 35.717000 302.457059 
 127.179556 35.717111 302.705587 
 127.179667 35.717111 302.126968 
 127.179778 35.717111 301.694404 
 127.179889 35.717111 301.407647 
 127.180111 35.717111 301.266869 
 127.180333 35.717111 301.697779 
 127.180444 35.717111 302.125789 
 127.180556 35.717111 302.693954 
 127.180667 35.717111 303.402431 
 127.179667 35.717111 302.126968 
 127.179778 35.717111 301.694404 
 127.179889 35.717111 301.407647 
 127.180000 35.717111 301.265351 
 127.180222 35.717111 301.411359 
 127.180444 35.717111 302.125789 
 127.180556 35.717111 302.693954 
 127.180667 35.717111 303.402431 
 127.180778 35.717111 304.249398 
 127.179667 35.717222 303.537670 
 127.179778 35.717222 303.057742 
 127.179889 35.717222 302.723388 
 127.180000 35.717222 302.533185 
 127.180222 35.717222 302.582604 
 127.180444 35.717222 303.199365 
 127.180556 35.717222 303.718313 
 127.180667 35.717222 304.377264 
 127.180778 35.717222 305.174477 
 127.179667 35.717333 304.974633 
 127.179778 35.717333 304.447307 
 127.179889 35.717333 304.065321 
 127.180000 35.717333 303.827180 
 127.180222 35.717333 303.779954 
 127.180444 35.717333 304.299000 
 127.180556 35.717333 304.768708 
 127.180667 35.717333 305.378116 
 127.180778 35.717333 306.125560 
 127.179667 35.717444 306.442712 
 127.179778 35.717444 305.867788 
 127.179889 35.717444 305.437974 
 127.180000 35.717444 305.151698 
 127.180222 35.717444 305.007439 
 127.180444 35.717444 305.428386 
 127.180556 35.717444 305.848666 
 127.180667 35.717444 306.408342 
 127.180778 35.717444 307.105828 
 127.179778 35.717444 305.867788 
 127.179889 35.717444 305.437974 
 127.180000 35.717444 305.151698 
 127.180111 35.717444 305.008542 
 127.180333 35.717444 305.147577 
 127.180556 35.717444 305.848666 
 127.180667 35.717444 306.408342 
 127.180778 35.717444 307.105828 
 127.180889 35.717444 307.941535 
 127.179778 35.717555 307.314215 
 127.179889 35.717555 306.836539 
 127.180000 35.717555 306.502099 
 127.180111 35.717555 306.310551 
 127.180333 35.717555 306.351968 
 127.180556 35.717555 306.954386 
 127.180667 35.717555 307.464311 
 127.180778 35.717555 308.111823 
 127.180889 35.717555 308.897256 
 127.179778 35.717667 308.791476 
 127.179889 35.717667 308.265742 
 127.180000 35.717667 307.882941 
 127.180111 35.717667 307.642805 
 127.180333 35.717667 307.586220 
 127.180556 35.717667 308.089583 
 127.180667 35.717667 308.549570 
 127.180778 35.717667 309.146921 
 127.180889 35.717667 309.881893 
 127.179889 35.717667 308.265742 
 127.180000 35.717667 307.882941 
 127.180111 35.717667 307.642805 
 127.180222 35.717667 307.544118 
 127.180444 35.717667 307.768390 
 127.180667 35.717667 308.549570 
 127.180778 35.717667 309.146921 
 127.180889 35.717667 309.881893 
 127.181000 35.717667 310.752679 
 127.179889 35.717778 309.720583 
 127.180000 35.717778 309.289390 
 127.180111 35.717778 309.000640 
 127.180222 35.717778 308.853037 
 127.180444 35.717778 308.978736 
 127.180667 35.717778 309.660301 
 127.180778 35.717778 310.207476 
 127.180889 35.717778 310.891974 
 127.181000 35.717778 311.712067 
 127.179889 35.717889 311.205982 
 127.180000 35.717889 310.726202 
 127.180111 35.717889 310.388642 
 127.180222 35.717889 310.191931 
 127.180444 35.717889 310.218671 
 127.180667 35.717889 310.800242 
 127.180778 35.717889 311.297053 
 127.180889 35.717889 311.930890 
 127.181000 35.717889 312.700105 
 127.179889 35.718000 312.719374 
 127.180000 35.718000 312.190894 
 127.180111 35.718000 311.804412 
 127.180222 35.718000 311.558482 
 127.180444 35.718000 311.486050 
 127.180667 35.718000 311.967420 
 127.180778 35.718000 312.413765 
 127.180889 35.718000 312.996841 
 127.181000 35.718000 313.715079 
 127.180000 35.718000 312.190894 
 127.180111 35.718000 311.804412 
 127.180222 35.718000 311.558482 
 127.180333 35.718000 311.452679 
 127.180556 35.718000 311.657784 
 127.180778 35.718000 312.413765 
 127.180889 35.718000 312.996841 
 127.181000 35.718000 313.715079 
 127.181111 35.718000 314.568980 
 127.180000 35.718111 313.680792 
 127.180111 35.718111 313.245362 
 127.180222 35.718111 312.950189 
 127.180333 35.718111 312.794925 
 127.180556 35.718111 312.900304 
 127.180778 35.718111 313.555540 
 127.180889 35.718111 314.087842 
 127.181000 35.718111 314.755094 
 127.181111 35.718111 315.557714 
 127.180000 35.718222 315.200942 
 127.180111 35.718222 314.716369 
 127.180222 35.718222 314.371758 
 127.180333 35.718222 314.166840 
 127.180556 35.718222 314.172111 
 127.180778 35.718222 314.726224 
 127.180889 35.718222 315.207566 
 127.181000 35.718222 315.823645 
 127.181111 35.718222 316.574802 
 127.180111 35.718222 314.716369 
 127.180222 35.718222 314.371758 
 127.180333 35.718222 314.166840 
 127.180444 35.718222 314.100509 
 127.180667 35.718222 314.381026 
 127.180889 35.718222 315.207566 
 127.181000 35.718222 315.823645 
 127.181111 35.718222 316.574802 
 127.181222 35.718222 317.459257 
 127.180111 35.718333 316.212294 
 127.180222 35.718333 315.818222 
 127.180333 35.718333 315.563629 
 127.180444 35.718333 315.447331 
 127.180667 35.718333 315.627198 
 127.180889 35.718333 316.352083 
 127.181000 35.718333 316.916981 
 127.181111 35.718333 317.616665 
 127.181222 35.718333 318.449440 
 127.180111 35.718444 317.738208 
 127.180222 35.718444 317.294480 
 127.180333 35.718444 316.990018 
 127.180444 35.718444 316.823561 
 127.180667 35.718444 316.902398 
 127.180889 35.718444 317.525254 
 127.181000 35.718444 318.038783 
 127.181111 35.718444 318.686811 
 127.181222 35.718444 319.467721 
 127.180111 35.718555 319.288785 
 127.180222 35.718555 318.795378 
 127.180333 35.718555 318.441026 
 127.180444 35.718555 318.224390 
 127.180667 35.718555 318.202164 
 127.180889 35.718555 318.722967 
 127.181000 35.718555 319.185119 
 127.181111 35.718555 319.781482 
 127.181222 35.718555 320.510523 
 127.180222 35.718555 318.795378 
 127.180333 35.718555 318.441026 
 127.180444 35.718555 318.224390 
 127.180556 35.718555 318.145055 
 127.180778 35.718555 318.394927 
 127.181000 35.718555 319.185119 
 127.181111 35.718555 319.781482 
 127.181222 35.718555 320.510523 
 127.181333 35.718555 321.372811 
 127.180222 35.718667 320.326004 
 127.180333 35.718667 319.921569 
 127.180444 35.718667 319.654563 
 127.180556 35.718667 319.524649 
 127.180778 35.718667 319.672585 
 127.181000 35.718667 320.359856 
 127.181111 35.718667 320.904370 
 127.181222 35.718667 321.581358 
 127.181333 35.718667 322.391307 
 127.180222 35.718778 321.883722 
 127.180333 35.718778 321.429096 
 127.180444 35.718778 321.111614 
 127.180556 35.718778 320.931018 
 127.180778 35.718778 320.976813 
 127.181000 35.718778 321.560966 
 127.181111 35.718778 322.053536 
 127.181222 35.718778 322.678376 
 127.181333 35.718778 323.435894 
 127.180333 35.718778 321.429096 
 127.180444 35.718778 321.111614 
 127.180556 35.718778 320.931018 
 127.180667 35.718778 320.886295 
 127.180889 35.718778 321.202038 
 127.181111 35.718778 322.053536 
 127.181222 35.718778 322.678376 
 127.181333 35.718778 323.435894 
 127.181444 35.718778 324.324355 
 127.180333 35.718889 322.960871 
 127.180444 35.718889 322.592894 
 127.180556 35.718889 322.361599 
 127.180667 35.718889 322.265894 
 127.180889 35.718889 322.478985 
 127.181111 35.718889 323.226861 
 127.181222 35.718889 323.799550 
 127.181333 35.718889 324.504634 
 127.181444 35.718889 325.340462 
 127.180333 35.719000 324.522090 
 127.180444 35.719000 324.103426 
 127.180556 35.719000 323.821241 
 127.180667 35.719000 323.674365 
 127.180889 35.719000 323.784427 
 127.181111 35.719000 324.428311 
 127.181222 35.719000 324.948664 
 127.181333 35.719000 325.601131 
 127.181444 35.719000 326.384144 
 127.180333 35.719111 326.107316 
 127.180444 35.719111 325.637947 
 127.180556 35.719111 325.304856 
 127.180667 35.719111 325.106794 
 127.180889 35.719111 325.113805 
 127.181111 35.719111 325.653684 
 127.181222 35.719111 326.121696 
 127.181333 35.719111 326.721545 
 127.181444 35.719111 327.451743 
 127.180444 35.719111 325.637947 
 127.180556 35.719111 325.304856 
 127.180667 35.719111 325.106794 
 127.180778 35.719111 325.043368 
 127.181000 35.719111 325.317345 
 127.181222 35.719111 326.121696 
 127.181333 35.719111 326.721545 
 127.181444 35.719111 327.451743 
 127.181556 35.719111 328.312915 
 127.180444 35.719222 327.201666 
 127.180556 35.719222 326.817478 
 127.180667 35.719222 326.568039 
 127.180778 35.719222 326.453040 
 127.181000 35.719222 326.623114 
 127.181222 35.719222 327.322613 
 127.181333 35.719222 327.869660 
 127.181444 35.719222 328.546862 
 127.181556 35.719222 329.354760 
 127.180444 35.719333 328.789137 
 127.180556 35.719333 328.353837 
 127.180667 35.719333 328.053009 
 127.180778 35.719333 327.886424 
 127.181000 35.719333 327.952578 
 127.181222 35.719333 328.547217 
 127.181333 35.719333 329.041460 
 127.181444 35.719333 329.665666 
 127.181556 35.719333 330.420292 
 127.180556 35.719444 329.919151 
 127.180667 35.719444 329.566743 
 127.180778 35.719444 329.348384 
 127.180889 35.719444 329.263055 
 127.181111 35.719444 329.489402 
 127.181333 35.719444 330.240909 
 127.181444 35.719444 330.811937 
 127.181556 35.719444 331.513110 
 127.181667 35.719444 332.342837 
 127.180556 35.719556 331.510730 
 127.180667 35.719556 331.106640 
 127.180778 35.719556 330.836406 
 127.180889 35.719556 330.698929 
 127.181111 35.719556 330.820320 
 127.181333 35.719556 331.465943 
 127.181444 35.719556 331.983702 
 127.181556 35.719556 332.631334 
 127.181667 35.719556 333.407330 
 127.180556 35.719667 333.125703 
 127.180667 35.719667 332.669919 
 127.180778 35.719667 332.347799 
 127.180889 35.719667 332.158164 
 127.181111 35.719667 332.174589 
 127.181333 35.719667 332.714324 
 127.181444 35.719667 333.178815 
 127.181556 35.719667 333.772909 
 127.181667 35.719667 334.495179 
 127.180667 35.719667 332.669919 
 127.180778 35.719667 332.347799 
 127.180889 35.719667 332.158164 
 127.181000 35.719667 332.100665 
 127.181222 35.719667 332.379225 
 127.181444 35.719667 333.178815 
 127.181556 35.719667 333.772909 
 127.181667 35.719667 334.495179 
 127.181778 35.719667 335.346289 
 127.180667 35.719778 334.261892 
 127.180778 35.719778 333.887698 
 127.180889 35.719778 333.645718 
 127.181000 35.719778 333.535684 
 127.181222 35.719778 333.708446 
 127.181444 35.719778 334.401324 
 127.181556 35.719778 334.941698 
 127.181667 35.719778 335.610062 
 127.181778 35.719778 336.406998 
 127.180667 35.719889 335.877025 
 127.180778 35.719889 335.450746 
 127.180889 35.719889 335.156412 
 127.181000 35.719889 334.993838 
 127.181222 35.719889 335.060796 
 127.181444 35.719889 335.646962 
 127.181556 35.719889 336.133619 
 127.181667 35.719889 336.748084 
 127.181778 35.719889 337.490851 
 127.180778 35.720000 337.042259 
 127.180889 35.720000 336.695382 
 127.181000 35.720000 336.480081 
 127.181111 35.720000 336.395395 
 127.181333 35.720000 336.615989 
 127.181556 35.720000 337.352713 
 127.181667 35.720000 337.913097 
 127.181778 35.720000 338.601518 
 127.181889 35.720000 339.416452 
 127.180778 35.720111 338.656704 
 127.180889 35.720111 338.257277 
 127.181000 35.720111 337.989242 
 127.181111 35.720111 337.851558 
 127.181333 35.720111 337.965524 
 127.181556 35.720111 338.594725 
 127.181667 35.720111 339.101036 
 127.181778 35.720111 339.735117 
 127.181889 35.720111 340.495532 
 127.180778 35.720222 340.299576 
 127.180889 35.720222 339.847411 
 127.181000 35.720222 339.526456 
 127.181111 35.720222 339.335586 
 127.181333 35.720222 339.342555 
 127.181556 35.720222 339.863870 
 127.181667 35.720222 340.315927 
 127.181778 35.720222 340.895490 
 127.181889 35.720222 341.601209 
 127.180889 35.720222 339.847411 
 127.181000 35.720222 339.526456 
 127.181111 35.720222 339.335586 
 127.181222 35.720222 339.274507 
 127.181444 35.720222 339.539079 
 127.181667 35.720222 340.315927 
 127.181778 35.720222 340.895490 
 127.181889 35.720222 341.601209 
 127.182000 35.720222 342.433772 
 127.180889 35.720333 341.460258 
 127.181000 35.720333 341.086377 
 127.181111 35.720333 340.842319 
 127.181222 35.720333 340.727872 
 127.181444 35.720333 340.885006 
 127.181667 35.720333 341.553535 
 127.181778 35.720333 342.078588 
 127.181889 35.720333 342.729620 
 127.182000 35.720333 343.507235 
 127.180889 35.720444 343.101310 
 127.181000 35.720444 342.674316 
 127.181111 35.720444 342.376883 
 127.181222 35.720444 342.208884 
 127.181444 35.720444 342.258212 
 127.181667 35.720444 342.818060 
 127.181778 35.720444 343.288424 
 127.181889 35.720444 343.884592 
 127.182000 35.720444 344.607081 
 127.180889 35.720556 344.767754 
 127.181000 35.720556 344.287550 
 127.181111 35.720556 343.936648 
 127.181222 35.720556 343.715003 
 127.181444 35.720556 343.656344 
 127.181667 35.720556 344.107336 
 127.181778 35.720556 344.522925 
 127.181889 35.720556 345.064144 
 127.182000 35.720556 345.731425 
 127.181000 35.720556 344.287550 
 127.181111 35.720556 343.936648 
 127.181222 35.720556 343.715003 
 127.181333 35.720556 343.621700 
 127.181556 35.720556 343.818471 
 127.181778 35.720556 344.522925 
 127.181889 35.720556 345.064144 
 127.182000 35.720556 345.731425 
 127.182111 35.720556 346.523329 
 127.181000 35.720667 345.923185 
 127.181111 35.720667 345.518810 
 127.181222 35.720667 345.243519 
 127.181333 35.720667 345.096312 
 127.181556 35.720667 345.184669 
 127.181778 35.720667 345.779848 
 127.181889 35.720667 346.266129 
 127.182000 35.720667 346.878215 
 127.182111 35.720667 347.614753 
 127.181000 35.720778 347.586794 
 127.181111 35.720778 347.128760 
 127.181222 35.720778 346.799637 
 127.181333 35.720778 346.598341 
 127.181556 35.720778 346.577920 
 127.181778 35.720778 347.063464 
 127.181889 35.720778 347.494629 
 127.182000 35.720778 348.051342 
 127.182111 35.720778 348.732337 
 127.181111 35.720778 347.128760 
 127.181222 35.720778 346.799637 
 127.181333 35.720778 346.598341 
 127.181444 35.720778 346.524646 
 127.181667 35.720778 346.757587 
 127.181889 35.720778 347.494629 
 127.182000 35.720778 348.051342 
 127.182111 35.720778 348.732337 
 127.182222 35.720778 349.538316 
 127.181111 35.720889 348.760910 
 127.181222 35.720889 348.377955 
 127.181333 35.720889 348.122572 
 127.181444 35.720889 347.994619 
 127.181667 35.720889 348.118366 
 127.181889 35.720889 348.745366 
 127.182000 35.720889 349.246719 
 127.182111 35.720889 349.872187 
 127.182222 35.720889 350.622384 
 127.181111 35.721000 350.420824 
 127.181222 35.721000 349.983851 
 127.181333 35.721000 349.674196 
 127.181444 35.721000 349.491803 
 127.181667 35.721000 349.505993 
 127.181889 35.721000 350.022593 
 127.182000 35.721000 350.468408 
 127.182111 35.721000 351.038173 
 127.182222 35.721000 351.732412 
 127.181222 35.721000 349.983851 
 127.181333 35.721000 349.674196 
 127.181444 35.721000 349.491803 
 127.181556 35.721000 349.435869 
 127.181778 35.721000 349.701816 
 127.182000 35.721000 350.468408 
 127.182111 35.721000 351.038173 
 127.182222 35.721000 351.732412 
 127.182333 35.721000 352.549695 
 127.181222 35.721111 351.611753 
 127.181333 35.721111 351.247828 
 127.181444 35.721111 351.010999 
 127.181556 35.721111 350.900377 
 127.181778 35.721111 351.056362 
 127.182000 35.721111 351.712158 
 127.182111 35.721111 352.226233 
 127.182222 35.721111 352.864532 
 127.182333 35.721111 353.625710 
 127.181222 35.721222 353.267213 
 127.181333 35.721222 352.848834 
 127.181444 35.721222 352.557384 
 127.181556 35.721222 352.391891 
 127.181778 35.721222 352.437554 
 127.182000 35.721222 352.982197 
 127.182111 35.721222 353.440407 
 127.182222 35.721222 354.022590 
 127.182333 35.721222 354.727490 
 127.181222 35.721333 354.947398 
 127.181333 35.721333 354.474474 
 127.181444 35.721333 354.128315 
 127.181556 35.721333 353.907862 
 127.181778 35.721333 353.843031 
 127.182000 35.721333 354.276355 
 127.182111 35.721333 354.678620 
 127.182222 35.721333 355.204607 
 127.182333 35.721333 355.853151 
 127.181333 35.721333 354.474474 
 127.181444 35.721333 354.128315 
 127.181556 35.721333 353.907862 
 127.181667 35.721333 353.812973 
 127.181889 35.721333 353.997549 
 127.182111 35.721333 354.678620 
 127.182222 35.721333 355.204607 
 127.182333 35.721333 355.853151 
 127.182444 35.721333 356.624949 
 127.181333 35.721444 356.121841 
 127.181444 35.721444 355.720977 
 127.181556 35.721444 355.445572 
 127.181667 35.721444 355.295569 
 127.181889 35.721444 355.369261 
 127.182111 35.721444 355.938631 
 127.182222 35.721444 356.408441 
 127.182333 35.721444 357.000647 
 127.182444 35.721444 357.715861 
 127.181333 35.721556 357.796559 
 127.181444 35.721556 357.340806 
 127.181556 35.721556 357.010266 
 127.181667 35.721556 356.804967 
 127.181889 35.721556 356.767416 
 127.182111 35.721556 357.224731 
 127.182222 35.721556 357.638187 
 127.182333 35.721556 358.173882 
 127.182444 35.721556 358.832337 
 127.181444 35.721556 357.340806 
 127.181556 35.721556 357.010266 
 127.181667 35.721556 356.804967 
 127.181778 35.721556 356.724121 
 127.182000 35.721556 356.934503 
 127.182222 35.721556 357.638187 
 127.182333 35.721556 358.173882 
 127.182444 35.721556 358.832337 
 127.182556 35.721556 359.612227 
 127.181444 35.721667 358.982187 
 127.181556 35.721667 358.596518 
 127.181667 35.721667 358.335932 
 127.181778 35.721667 358.199555 
 127.182000 35.721667 358.298314 
 127.182222 35.721667 358.889572 
 127.182333 35.721667 359.368775 
 127.182444 35.721667 359.970493 
 127.182556 35.721667 360.693491 
 127.181444 35.721778 360.650723 
 127.181556 35.721778 360.209743 
 127.181667 35.721778 359.893688 
 127.181778 35.721778 359.701599 
 127.182000 35.721778 359.688378 
 127.182222 35.721778 360.166856 
 127.182333 35.721778 360.589393 
 127.182444 35.721778 361.134201 
 127.182556 35.721778 361.800133 
 127.181444 35.721889 362.340634 
 127.181556 35.721889 361.844350 
 127.181667 35.721889 361.472837 
 127.181778 35.721889 361.225046 
 127.182000 35.721889 361.099872 
 127.182222 35.721889 361.465606 
 127.182333 35.721889 361.831496 
 127.182444 35.721889 362.319416 
 127.182556 35.721889 362.928307 
 127.181556 35.721889 361.844350 
 127.181667 35.721889 361.472837 
 127.181778 35.721889 361.225046 
 127.181889 35.721889 361.100928 
 127.182111 35.721889 361.221490 
 127.182333 35.721889 361.831496 
 127.182444 35.721889 362.319416 
 127.182556 35.721889 362.928307 
 127.182667 35.721889 363.658855 
 127.181556 35.722000 363.505923 
 127.181667 35.722000 363.078769 
 127.181778 35.722000 362.775096 
 127.181889 35.722000 362.594943 
 127.182111 35.722000 362.602801 
 127.182333 35.722000 363.099316 
 127.182444 35.722000 363.530173 
 127.182556 35.722000 364.081850 
 127.182667 35.722000 364.754943 
 127.181556 35.722111 365.188708 
 127.181667 35.722111 364.705922 
 127.181778 35.722111 364.346379 
 127.181889 35.722111 364.110204 
 127.182111 35.722111 364.005389 
 127.182333 35.722111 364.388452 
 127.182444 35.722111 364.762269 
 127.182556 35.722111 365.256757 
 127.182667 35.722111 365.872420 
 127.181667 35.722111 364.705922 
 127.181778 35.722111 364.346379 
 127.181889 35.722111 364.110204 
 127.182000 35.722111 363.996611 
 127.182222 35.722111 364.136185 
 127.182444 35.722111 364.762269 
 127.182556 35.722111 365.256757 
 127.182667 35.722111 365.872420 
 127.182778 35.722111 366.608049 
 127.181667 35.722222 366.359855 
 127.181778 35.722222 365.944261 
 127.181889 35.722222 365.651885 
 127.182000 35.722222 365.481852 
 127.182222 35.722222 365.508009 
 127.182444 35.722222 366.019903 
 127.182556 35.722222 366.457028 
 127.182667 35.722222 367.015090 
 127.182778 35.722222 367.692970 
 127.181667 35.722333 368.037748 
 127.181778 35.722333 367.566017 
 127.181889 35.722333 367.217356 
 127.182000 35.722333 366.990802 
 127.182222 35.722333 366.903384 
 127.182444 35.722333 367.300934 
 127.182556 35.722333 367.680621 
 127.182667 35.722333 368.181009 
 127.182778 35.722333 368.801068 
 127.181667 35.722444 369.736614 
 127.181778 35.722444 369.208759 
 127.181889 35.722444 368.803827 
 127.182000 35.722444 368.520767 
 127.182222 35.722444 368.319809 
 127.182444 35.722444 368.603058 
 127.182556 35.722444 368.925333 
 127.182667 35.722444 369.368073 
 127.182778 35.722444 369.930339 
 127.181778 35.722444 369.208759 
 127.181889 35.722444 368.803827 
 127.182000 35.722444 368.520767 
 127.182111 35.722444 368.359634 
 127.182333 35.722444 368.401014 
 127.182556 35.722444 368.925333 
 127.182667 35.722444 369.368073 
 127.182778 35.722444 369.930339 
 127.182889 35.722444 370.612790 
 127.181778 35.722556 370.878102 
 127.181889 35.722556 370.416719 
 127.182000 35.722556 370.076974 
 127.182111 35.722556 369.859011 
 127.182333 35.722556 369.786119 
 127.182556 35.722556 370.195409 
 127.182667 35.722556 370.580329 
 127.182778 35.722556 371.084631 
 127.182889 35.722556 371.708884 
 127.181778 35.722667 372.568272 
 127.181889 35.722667 372.050451 
 127.182000 35.722667 371.654037 
 127.182111 35.722667 371.379262 
 127.182333 35.722667 371.192139 
 127.182556 35.722667 371.486448 
 127.182667 35.722667 371.813574 
 127.182778 35.722667 372.259940 
 127.182889 35.722667 372.826025 
 127.181889 35.722667 372.050451 
 127.182000 35.722667 371.654037 
 127.182111 35.722667 371.379262 
 127.182222 35.722667 371.225329 
 127.182444 35.722667 371.279322 
 127.182667 35.722667 371.813574 
 127.182778 35.722667 372.259940 
 127.182889 35.722667 372.826025 
 127.183000 35.722667 373.510743 
 127.181889 35.722778 373.710611 
 127.182000 35.722778 373.257349 
 127.182111 35.722778 372.925584 
 127.182222 35.722778 372.714429 
 127.182444 35.722778 372.653465 
 127.182667 35.722778 373.072016 
 127.182778 35.722778 373.460275 
 127.182889 35.722778 373.968022 
 127.183000 35.722778 374.594260 
 127.181889 35.722889 375.391457 
 127.182000 35.722889 374.881363 
 127.182111 35.722889 374.492625 
 127.182222 35.722889 374.224270 
 127.182444 35.722889 374.048393 
 127.182667 35.722889 374.351295 
 127.182778 35.722889 374.681476 
 127.182889 35.722889 375.130913 
 127.183000 35.722889 375.698705 
 127.181889 35.723000 377.098741 
 127.182000 35.723000 376.531635 
 127.182111 35.723000 376.085747 
 127.182222 35.723000 375.760012 
 127.182444 35.723000 375.468874 
 127.182667 35.723000 375.655779 
 127.182778 35.723000 375.927710 
 127.182889 35.723000 376.318668 
 127.183000 35.723000 376.827844 
 127.182000 35.723000 376.531635 
 127.182111 35.723000 376.085747 
 127.182222 35.723000 375.760012 
 127.182333 35.723000 375.554601 
 127.182556 35.723000 375.502672 
 127.182778 35.723000 375.927710 
 127.182889 35.723000 376.318668 
 127.183000 35.723000 376.827844 
 127.183111 35.723000 377.455859 
 127.182000 35.723111 378.205356 
 127.182111 35.723111 377.702238 
 127.182222 35.723111 377.319045 
 127.182333 35.723111 377.056039 
 127.182556 35.723111 376.888330 
 127.182778 35.723111 377.196861 
 127.182889 35.723111 377.529271 
 127.183000 35.723111 377.979762 
 127.183111 35.723111 378.548864 
 127.182000 35.723222 379.899557 
 127.182111 35.723222 379.339226 
 127.182222 35.723222 378.898597 
 127.182333 35.723222 378.578018 
 127.182556 35.723222 378.294579 
 127.182778 35.723222 378.486659 
 127.182889 35.723222 378.760550 
 127.183000 35.723222 379.152388 
 127.183111 35.723222 379.662611 
 127.182111 35.723222 379.339226 
 127.182222 35.723222 378.898597 
 127.182333 35.723222 378.578018 
 127.182444 35.723222 378.376671 
 127.182667 35.723222 378.331342 
 127.182889 35.723222 378.760550 
 127.183000 35.723222 379.152388 
 127.183111 35.723222 379.662611 
 127.183222 35.723222 380.290268 
 127.182111 35.723333 381.002316 
 127.182222 35.723333 380.504072 
 127.182333 35.723333 380.125744 
 127.182444 35.723333 379.866424 
 127.182667 35.723333 379.704657 
 127.182889 35.723333 380.016711 
 127.183000 35.723333 380.349727 
 127.183111 35.723333 380.800903 
 127.183222 35.723333 381.369380 
 127.182111 35.723444 382.685761 
 127.182222 35.723444 382.129923 
 127.182333 35.723444 381.693869 
 127.182444 35.723444 381.376600 
 127.182667 35.723444 381.098448 
 127.182889 35.723444 381.293408 
 127.183000 35.723444 381.567634 
 127.183111 35.723444 381.959796 
 127.183222 35.723444 382.469129 
 127.182222 35.723444 382.129923 
 127.182333 35.723444 381.693869 
 127.182444 35.723444 381.376600 
 127.182556 35.723444 381.178319 
 127.182778 35.723444 381.136865 
 127.183000 35.723444 381.567634 
 127.183111 35.723444 381.959796 
 127.183222 35.723444 382.469129 
 127.183333 35.723444 383.096300 
 127.182222 35.723556 383.781716 
 127.182333 35.723556 383.287760 
 127.182444 35.723556 382.912366 
 127.182556 35.723556 382.655830 
 127.182778 35.723556 382.497291 
 127.183000 35.723556 382.810271 
 127.183111 35.723556 383.143251 
 127.183222 35.723556 383.593272 
 127.183333 35.723556 384.160909 
 127.182222 35.723667 385.453748 
 127.182333 35.723667 384.901911 
 127.182444 35.723667 384.468417 
 127.182556 35.723667 384.153652 
 127.182778 35.723667 383.878085 
 127.183000 35.723667 384.073339 
 127.183111 35.723667 384.347172 
 127.183222 35.723667 384.737917 
 127.183333 35.723667 385.246057 
 127.182222 35.723778 387.151746 
 127.182333 35.723778 386.541851 
 127.182444 35.723778 386.050081 
 127.182556 35.723778 385.676912 
 127.182778 35.723778 385.283972 
 127.183000 35.723778 385.361160 
 127.183111 35.723778 385.575676 
 127.183222 35.723778 385.906977 
 127.183333 35.723778 386.355453 
 127.182333 35.723778 386.541851 
 127.182444 35.723778 386.050081 
 127.182556 35.723778 385.676912 
 127.182667 35.723778 385.421491 
 127.182889 35.723778 385.263917 
 127.183111 35.723778 385.575676 
 127.183222 35.723778 385.906977 
 127.183333 35.723778 386.355453 
 127.183444 35.723778 386.920293 
 127.182333 35.723889 388.204796 
 127.182444 35.723889 387.654673 
 127.182556 35.723889 387.223026 
 127.182667 35.723889 386.908909 
 127.182889 35.723889 386.633474 
 127.183111 35.723889 386.826682 
 127.183222 35.723889 387.098474 
 127.183333 35.723889 387.487221 
 127.183444 35.723889 387.992208 
 127.182333 35.724000 389.887801 
 127.182444 35.724000 389.279352 
 127.182556 35.724000 388.789253 
 127.182667 35.724000 388.416468 
 127.182889 35.724000 388.023232 
 127.183111 35.724000 388.097958 
 127.183222 35.724000 388.310277 
 127.183333 35.724000 388.639333 
 127.183444 35.724000 389.084506 
 127.182444 35.724000 389.279352 
 127.182556 35.724000 388.789253 
 127.182667 35.724000 388.416468 
 127.182778 35.724000 388.161335 
 127.183000 35.724000 388.002176 
 127.183222 35.724000 388.310277 
 127.183333 35.724000 388.639333 
 127.183444 35.724000 389.084506 
 127.183556 35.724000 389.646408 
 127.182444 35.724111 390.929684 
 127.182556 35.724111 390.380959 
 127.182667 35.724111 389.949332 
 127.182778 35.724111 389.635235 
 127.183000 35.724111 389.357592 
 127.183222 35.724111 389.546532 
 127.183333 35.724111 389.815731 
 127.183444 35.724111 390.200923 
 127.183556 35.724111 390.702628 
 127.182444 35.724222 392.599976 
 127.182556 35.724222 391.992651 
 127.182667 35.724222 391.502211 
 127.182778 35.724222 391.129179 
 127.183000 35.724222 390.733118 
 127.183222 35.724222 390.802969 
 127.183333 35.724222 391.012349 
 127.183444 35.724222 391.337600 
 127.183556 35.724222 391.779150 
 127.182556 35.724333 393.629855 
 127.182667 35.724333 393.080427 
 127.182778 35.724333 392.648287 
 127.182889 35.724333 392.332534 
 127.183111 35.724333 392.050591 
 127.183333 35.724333 392.233282 
 127.183444 35.724333 392.498426 
 127.183556 35.724333 392.879655 
 127.183667 35.724333 393.376307 
 127.182556 35.724444 395.286922 
 127.182667 35.724444 394.678535 
 127.182778 35.724444 394.187317 
 127.182889 35.724444 393.812276 
 127.183111 35.724444 393.411308 
 127.183333 35.724444 393.474313 
 127.183444 35.724444 393.679391 
 127.183556 35.724444 394.000340 
 127.183667 35.724444 394.436595 
 127.182556 35.724556 396.969535 
 127.182667 35.724556 396.302015 
 127.182778 35.724556 395.751547 
 127.182889 35.724556 395.317045 
 127.183111 35.724556 394.796710 
 127.183333 35.724556 394.739694 
 127.183444 35.724556 394.884538 
 127.183556 35.724556 395.145043 
 127.183667 35.724556 395.520736 
 127.182667 35.724556 396.302015 
 127.182778 35.724556 395.751547 
 127.182889 35.724556 395.317045 
 127.183000 35.724556 394.998991 
 127.183222 35.724556 394.710366 
 127.183444 35.724556 394.884538 
 127.183556 35.724556 395.145043 
 127.183667 35.724556 395.520736 
 127.183778 35.724556 396.012166 
 127.182667 35.724667 397.945269 
 127.182778 35.724667 397.335581 
 127.182889 35.724667 396.841650 
 127.183000 35.724667 396.464052 
 127.183222 35.724667 396.055806 
 127.183444 35.724667 396.109708 
 127.183556 35.724667 396.309809 
 127.183667 35.724667 396.624984 
 127.183778 35.724667 397.055686 
 127.182667 35.724778 399.613936 
 127.182778 35.724778 398.944854 
 127.182889 35.724778 398.391322 
 127.183000 35.724778 397.954009 
 127.183222 35.724778 397.425802 
 127.183444 35.724778 397.359097 
 127.183556 35.724778 397.498630 
 127.183667 35.724778 397.753121 
 127.183778 35.724778 398.122931 
 127.182778 35.724778 398.944854 
 127.182889 35.724778 398.391322 
 127.183000 35.724778 397.954009 
 127.183111 35.724778 397.632052 
 127.183333 35.724778 397.334806 
 127.183556 35.724778 397.498630 
 127.183667 35.724778 397.753121 
 127.183778 35.724778 398.122931 
 127.183889 35.724778 398.607459 
 127.182778 35.724889 400.576640 
 127.182889 35.724889 399.963437 
 127.183000 35.724889 399.466339 
 127.183111 35.724889 399.084392 
 127.183333 35.724889 398.666731 
 127.183556 35.724889 398.709501 
 127.183667 35.724889 398.903249 
 127.183778 35.724889 399.212106 
 127.183889 35.724889 399.635570 
 127.182778 35.725000 402.228061 
 127.182889 35.725000 401.555219 
 127.183000 35.725000 400.998372 
 127.183111 35.725000 400.556469 
 127.183333 35.725000 400.018471 
 127.183556 35.725000 399.940269 
 127.183667 35.725000 400.073317 
 127.183778 35.725000 400.321268 
 127.183889 35.725000 400.683714 
 127.182778 35.725111 403.904787 
 127.182889 35.725111 403.172133 
 127.183000 35.725111 402.555364 
 127.183111 35.725111 402.053336 
 127.183333 35.725111 401.394662 
 127.183556 35.725111 401.195155 
 127.183667 35.725111 401.267337 
 127.183778 35.725111 401.454217 
 127.183889 35.725111 401.755482 
 127.182889 35.725111 403.172133 
 127.183000 35.725111 402.555364 
 127.183111 35.725111 402.053336 
 127.183222 35.725111 401.666681 
 127.183444 35.725111 401.237597 
 127.183667 35.725111 401.267337 
 127.183778 35.725111 401.454217 
 127.183889 35.725111 401.755482 
 127.184000 35.725111 402.171608 
 127.182889 35.725222 404.808608 
 127.183000 35.725222 404.131951 
 127.183111 35.725222 403.569833 
 127.183222 35.725222 403.122980 
 127.183444 35.725222 402.572986 
 127.183667 35.725222 402.481192 
 127.183778 35.725222 402.607046 
 127.183889 35.725222 402.847177 
 127.184000 35.725222 403.201964 
 127.182889 35.725333 406.470262 
 127.183000 35.725333 405.733546 
 127.183111 35.725333 405.111167 
 127.183222 35.725333 404.603946 
 127.183444 35.725333 403.932705 
 127.183667 35.725333 403.719044 
 127.183778 35.725333 403.783709 
 127.183889 35.725333 403.962543 
 127.184000 35.725333 404.255829 
 127.183000 35.725333 405.733546 
 127.183111 35.725333 405.111167 
 127.183222 35.725333 404.603946 
 127.183333 35.725333 404.210956 
 127.183556 35.725333 403.768670 
 127.183778 35.725333 403.783709 
 127.183889 35.725333 403.962543 
 127.184000 35.725333 404.255829 
 127.184111 35.725333 404.663132 
 127.183000 35.725444 407.354632 
 127.183111 35.725444 406.672028 
 127.183222 35.725444 406.104477 
 127.183333 35.725444 405.650956 
 127.183556 35.725444 405.087197 
 127.183778 35.725444 404.980150 
 127.183889 35.725444 405.097733 
 127.184000 35.725444 405.329567 
 127.184111 35.725444 405.675312 
 127.183000 35.725556 409.000777 
 127.183111 35.725556 408.257777 
 127.183222 35.725556 407.629726 
 127.183333 35.725556 407.115506 
 127.183556 35.725556 406.429939 
 127.183778 35.725556 406.200474 
 127.183889 35.725556 406.256644 
 127.184000 35.725556 406.426863 
 127.184111 35.725556 406.710888 
 127.183111 35.725556 408.257777 
 127.183222 35.725556 407.629726 
 127.183333 35.725556 407.115506 
 127.183444 35.725556 406.715815 
 127.183667 35.725556 406.258263 
 127.183889 35.725556 406.256644 
 127.184000 35.725556 406.426863 
 127.184111 35.725556 406.710888 
 127.184222 35.725556 407.109210 
 127.183111 35.725667 409.865737 
 127.183222 35.725667 409.177120 
 127.183333 35.725667 408.602135 
 127.183444 35.725667 408.141577 
 127.183667 35.725667 407.561788 
 127.183889 35.725667 407.437329 
 127.184000 35.725667 407.545876 
 127.184111 35.725667 407.768126 
 127.184222 35.725667 408.104471 
 127.183111 35.725778 411.493077 
 127.183222 35.725778 410.743931 
 127.183333 35.725778 410.108222 
 127.183444 35.725778 409.586837 
 127.183667 35.725778 408.884900 
 127.183889 35.725778 408.637693 
 127.184000 35.725778 408.684617 
 127.184111 35.725778 408.845141 
 127.184222 35.725778 409.119563 
 127.183111 35.725889 413.145390 
 127.183222 35.725889 412.335545 
 127.183333 35.725889 411.638941 
 127.183444 35.725889 411.056562 
 127.183667 35.725889 410.232143 
 127.183889 35.725889 409.861859 
 127.184000 35.725889 409.846997 
 127.184111 35.725889 409.945634 
 127.184222 35.725889 410.157970 
 127.183222 35.725889 412.335545 
 127.183333 35.725889 411.638941 
 127.183444 35.725889 411.056562 
 127.183556 35.725889 410.587405 
 127.183778 35.725889 409.990174 
 127.184000 35.725889 409.846997 
 127.184111 35.725889 409.945634 
 127.184222 35.725889 410.157970 
 127.184333 35.725889 410.484039 
 127.183222 35.726000 413.946484 
 127.183333 35.726000 413.189026 
 127.183444 35.726000 412.545693 
 127.183556 35.726000 412.015388 
 127.183778 35.726000 411.295468 
 127.184000 35.726000 411.029012 
 127.184111 35.726000 411.065813 
 127.184222 35.726000 411.216116 
 127.184333 35.726000 411.480004 
 127.183222 35.726111 415.582286 
 127.183333 35.726111 414.763804 
 127.183444 35.726111 414.059348 
 127.183556 35.726111 413.467728 
 127.183778 35.726111 412.624788 
 127.184000 35.726111 412.234725 
 127.184111 35.726111 412.209527 
 127.184222 35.726111 412.297636 
 127.184333 35.726111 412.499182 
 127.183333 35.726111 414.763804 
 127.183444 35.726111 414.059348 
 127.183556 35.726111 413.467728 
 127.183667 35.726111 412.989806 
 127.183889 35.726111 412.373225 
 127.184111 35.726111 412.209527 
 127.184222 35.726111 412.297636 
 127.184333 35.726111 412.499182 
 127.184444 35.726111 412.813960 
 127.183333 35.726222 416.357857 
 127.183444 35.726222 415.592322 
 127.183556 35.726222 414.939429 
 127.183667 35.726222 414.400137 
 127.183889 35.726222 413.660338 
 127.184111 35.726222 413.372840 
 127.184222 35.726222 413.398807 
 127.184333 35.726222 413.538064 
 127.184444 35.726222 413.790457 
 127.183333 35.726333 417.976669 
 127.183444 35.726333 417.149884 
 127.183556 35.726333 416.435551 
 127.183667 35.726333 415.834724 
 127.183889 35.726333 414.971374 
 127.184111 35.726333 414.559750 
 127.184222 35.726333 414.523413 
 127.184333 35.726333 414.600222 
 127.184444 35.726333 414.790070 
 127.183444 35.726333 417.149884 
 127.183556 35.726333 416.435551 
 127.183667 35.726333 415.834724 
 127.183778 35.726333 415.346417 
 127.184000 35.726333 414.709007 
 127.184222 35.726333 414.523413 
 127.184333 35.726333 414.600222 
 127.184444 35.726333 414.790070 
 127.184556 35.726333 415.093363 
 127.183444 35.726445 418.729411 
 127.183556 35.726445 417.953575 
 127.183667 35.726445 417.291151 
 127.183778 35.726445 416.741057 
 127.184000 35.726445 415.979693 
 127.184222 35.726445 415.669574 
 127.184333 35.726445 415.683880 
 127.184444 35.726445 415.811130 
 127.184556 35.726445 416.051633 
 127.183444 35.726556 420.328129 
 127.183556 35.726556 419.490833 
 127.183667 35.726556 418.766857 
 127.183778 35.726556 418.155022 
 127.184000 35.726556 417.269802 
 127.184222 35.726556 416.835260 
 127.184333 35.726556 416.787117 
 127.184444 35.726556 416.851826 
 127.184556 35.726556 417.029595 
 127.183444 35.726667 421.951540 
 127.183556 35.726667 421.052615 
 127.183667 35.726667 420.266920 
 127.183778 35.726667 419.593177 
 127.184000 35.726667 418.583772 
 127.184222 35.726667 418.024482 
 127.184333 35.726667 417.913730 
 127.184444 35.726667 417.915736 
 127.184556 35.726667 418.030613 
 127.183556 35.726667 421.052615 
 127.183667 35.726667 420.266920 
 127.183778 35.726667 419.593177 
 127.183889 35.726667 419.032421 
 127.184111 35.726667 418.247953 
 127.184333 35.726667 417.913730 
 127.184444 35.726667 417.915736 
 127.184556 35.726667 418.030613 
 127.184667 35.726667 418.258306 
 127.183556 35.726778 422.633552 
 127.183667 35.726778 421.786183 
 127.183778 35.726778 421.050579 
 127.183889 35.726778 420.427872 
 127.184111 35.726778 419.519038 
 127.184333 35.726778 419.059843 
 127.184444 35.726778 418.999203 
 127.184556 35.726778 419.051244 
 127.184667 35.726778 419.216010 
 127.183556 35.726889 424.239086 
 127.183667 35.726889 423.329875 
 127.183778 35.726889 422.532244 
 127.183889 35.726889 421.847421 
 127.184111 35.726889 420.813893 
 127.184333 35.726889 420.229401 
 127.184444 35.726889 420.105955 
 127.184556 35.726889 420.095000 
 127.184667 35.726889 420.196681 
 127.183667 35.726889 423.329875 
 127.183778 35.726889 422.532244 
 127.183889 35.726889 421.847421 
 127.184000 35.726889 421.274331 
 127.184222 35.726889 420.465427 
 127.184444 35.726889 420.105955 
 127.184556 35.726889 420.095000 
 127.184667 35.726889 420.196681 
 127.184778 35.726889 420.411305 
 127.183667 35.727000 424.892691 
 127.183778 35.727000 424.033080 
 127.183889 35.727000 423.286188 
 127.184000 35.727000 422.650846 
 127.184222 35.727000 421.717075 
 127.184444 35.727000 421.232189 
 127.184556 35.727000 421.158296 
 127.184667 35.727000 421.196949 
 127.184778 35.727000 421.348359 
 127.183667 35.727111 426.480014 
 127.183778 35.727111 425.558254 
 127.183889 35.727111 424.749129 
 127.184000 35.727111 424.051368 
 127.184222 35.727111 422.992405 
 127.184444 35.727111 422.381782 
 127.184556 35.727111 422.244791 
 127.184667 35.727111 422.220259 
 127.184778 35.727111 422.308296 
 127.183778 35.727111 425.558254 
 127.183889 35.727111 424.749129 
 127.184000 35.727111 424.051368 
 127.184111 35.727111 423.466086 
 127.184333 35.727111 422.630891 
 127.184556 35.727111 422.244791 
 127.184667 35.727111 422.220259 
 127.184778 35.727111 422.308296 
 127.184889 35.727111 422.508932 
 127.183778 35.727222 427.102528 
 127.183889 35.727222 426.231218 
 127.184000 35.727222 425.471089 
 127.184111 35.727222 424.823353 
 127.184333 35.727222 423.862752 
 127.184556 35.727222 423.350753 
 127.184667 35.727222 423.263095 
 127.184778 35.727222 423.287819 
 127.184889 35.727222 423.425055 
 127.183778 35.727333 428.671221 
 127.183889 35.727333 427.737559 
 127.184000 35.727333 426.914897 
 127.184111 35.727333 426.204544 
 127.184333 35.727333 425.118210 
 127.184556 35.727333 424.479993 
 127.184667 35.727333 424.329049 
 127.184778 35.727333 424.290302 
 127.184889 35.727333 424.363983 
 127.183889 35.727333 427.737559 
 127.184000 35.727333 426.914897 
 127.184111 35.727333 426.204544 
 127.184222 35.727333 425.605427 
 127.184444 35.727333 424.743227 
 127.184667 35.727333 424.329049 
 127.184778 35.727333 424.290302 
 127.184889 35.727333 424.363983 
 127.185000 35.727333 424.550393 
 127.183889 35.727445 429.265624 
 127.184000 35.727445 428.380371 
 127.184111 35.727445 427.607344 
 127.184222 35.727445 426.945373 
 127.184444 35.727445 425.957115 
 127.184667 35.727445 425.416348 
 127.184778 35.727445 425.314082 
 127.184889 35.727445 425.324158 
 127.185000 35.727445 425.446780 
 127.183889 35.727556 430.812737 
 127.184000 35.727556 429.864943 
 127.184111 35.727556 429.029294 
 127.184222 35.727556 428.304520 
 127.184444 35.727556 427.190315 
 127.184667 35.727556 426.523074 
 127.184778 35.727556 426.357348 
 127.184889 35.727556 426.303881 
 127.185000 35.727556 426.362777 
 127.183889 35.727667 432.384229 
 127.184000 35.727667 431.373727 
 127.184111 35.727667 430.475292 
 127.184222 35.727667 429.687553 
 127.184444 35.727667 428.447075 
 127.184667 35.727667 427.653041 
 127.184778 35.727667 427.423697 
 127.184889 35.727667 427.306530 
 127.185000 35.727667 427.301543 
 127.184000 35.727667 431.373727 
 127.184111 35.727667 430.475292 
 127.184222 35.727667 429.687553 
 127.184333 35.727667 429.011320 
 127.184556 35.727667 427.994038 
 127.184778 35.727667 427.423697 
 127.184889 35.727667 427.306530 
 127.185000 35.727667 427.301543 
 127.185111 35.727667 427.408953 
 127.184000 35.727778 432.901548 
 127.184111 35.727778 431.940376 
 127.184222 35.727778 431.089724 
 127.184333 35.727778 430.350450 
 127.184556 35.727778 429.206748 
 127.184778 35.727778 428.509470 
 127.184889 35.727778 428.328664 
 127.185000 35.727778 428.259858 
 127.185111 35.727778 428.303367 
 127.184000 35.727889 434.453670 
 127.184111 35.727889 433.429598 
 127.184222 35.727889 432.515869 
 127.184333 35.727889 431.713391 
 127.184556 35.727889 430.442947 
 127.184778 35.727889 429.618412 
 127.184889 35.727889 429.373810 
 127.185000 35.727889 429.241028 
 127.185111 35.727889 429.220480 
 127.184111 35.727889 433.429598 
 127.184222 35.727889 432.515869 
 127.184333 35.727889 431.713391 
 127.184444 35.727889 431.022744 
 127.184667 35.727889 429.975033 
 127.184889 35.727889 429.373810 
 127.185000 35.727889 429.241028 
 127.185111 35.727889 429.220480 
 127.185222 35.727889 429.312361 
 127.184111 35.728000 434.937847 
 127.184222 35.728000 433.961094 
 127.184333 35.728000 433.095466 
 127.184444 35.728000 432.341593 
 127.184667 35.728000 431.166999 
 127.184889 35.728000 430.438383 
 127.185000 35.728000 430.241687 
 127.185111 35.728000 430.157148 
 127.185222 35.728000 430.184857 
 127.184111 35.728111 436.470326 
 127.184222 35.728111 435.430385 
 127.184333 35.728111 434.501444 
 127.184444 35.728111 433.684181 
 127.184667 35.728111 432.382383 
 127.184889 35.728111 431.526057 
 127.185000 35.728111 431.265291 
 127.185111 35.728111 431.116603 
 127.185222 35.728111 431.079986 
 127.184222 35.728111 435.430385 
 127.184333 35.728111 434.501444 
 127.184444 35.728111 433.684181 
 127.184556 35.728111 432.977417 
 127.184778 35.728111 431.898288 
 127.185000 35.728111 431.265291 
 127.185111 35.728111 431.116603 
 127.185222 35.728111 431.079986 
 127.185333 35.728111 431.155743 
 127.184222 35.728222 436.921281 
 127.184333 35.728222 435.928972 
 127.184444 35.728222 435.048267 
 127.184556 35.728222 434.277887 
 127.184778 35.728222 433.071201 
 127.185000 35.728222 432.310143 
 127.185111 35.728222 432.097261 
 127.185222 35.728222 431.996272 
 127.185333 35.728222 432.007580 
 127.184222 35.728333 438.431177 
 127.184333 35.728333 437.375554 
 127.184444 35.728333 436.431463 
 127.184556 35.728333 435.597524 
 127.184778 35.728333 434.263399 
 127.185000 35.728333 433.374405 
 127.185111 35.728333 433.097392 
 127.185222 35.728333 432.932097 
 127.185333 35.728333 432.879023 
 127.184222 35.728445 439.965281 
 127.184333 35.728445 438.846182 
 127.184444 35.728445 437.838542 
 127.184556 35.728445 436.940882 
 127.184778 35.728445 435.478997 
 127.185000 35.728445 434.461751 
 127.185111 35.728445 434.120451 
 127.185222 35.728445 433.890694 
 127.185333 35.728445 433.773083 
 127.184333 35.728445 438.846182 
 127.184444 35.728445 437.838542 
 127.184556 35.728445 436.940882 
 127.184667 35.728445 436.154731 
 127.184889 35.728445 434.914905 
 127.185111 35.728445 434.120451 
 127.185222 35.728445 433.890694 
 127.185333 35.728445 433.773083 
 127.185444 35.728445 433.767699 
 127.184333 35.728556 440.335814 
 127.184444 35.728556 439.264681 
 127.184556 35.728556 438.303357 
 127.184667 35.728556 437.453471 
 127.184889 35.728556 436.085761 
 127.185111 35.728556 435.162934 
 127.185222 35.728556 434.868780 
 127.185333 35.728556 434.686700 
 127.185444 35.728556 434.616671 
 127.184333 35.728667 441.849591 
 127.184444 35.728667 440.714802 
 127.184556 35.728667 439.689653 
 127.184667 35.728667 438.775871 
 127.184889 35.728667 437.279958 
 127.185111 35.728667 436.228443 
 127.185222 35.728667 435.869736 
 127.185333 35.728667 435.623031 
 127.185444 35.728667 435.488203 
 127.184444 35.728667 440.714802 
 127.184556 35.728667 439.689653 
 127.184667 35.728667 438.775871 
 127.184778 35.728667 437.972165 
 127.185000 35.728667 436.698346 
 127.185222 35.728667 435.869736 
 127.185333 35.728667 435.623031 
 127.185444 35.728667 435.488203 
 127.185556 35.728667 435.465748 
 127.184444 35.728778 442.183937 
 127.184556 35.728778 441.095019 
 127.184667 35.728778 440.117401 
 127.184778 35.728778 439.249689 
 127.185000 35.728778 437.847548 
 127.185222 35.728778 436.890135 
 127.185333 35.728778 436.578872 
 127.185444 35.728778 436.379314 
 127.185556 35.728778 436.292056 
 127.184444 35.728889 443.677159 
 127.184556 35.728889 442.524310 
 127.184667 35.728889 441.482693 
 127.184778 35.728889 440.550815 
 127.185000 35.728889 439.020034 
 127.185222 35.728889 437.933505 
 127.185333 35.728889 437.557528 
 127.185444 35.728889 437.293084 
 127.185556 35.728889 437.140871 
 127.184556 35.728889 442.524310 
 127.184667 35.728889 441.482693 
 127.184778 35.728889 440.550815 
 127.184889 35.728889 439.730297 
 127.185111 35.728889 438.421343 
 127.185333 35.728889 437.557528 
 127.185444 35.728889 437.293084 
 127.185556 35.728889 437.140871 
 127.185667 35.728889 437.100950 
 127.184556 35.729000 443.972629 
 127.184667 35.729000 442.867072 
 127.184778 35.729000 441.871087 
 127.184889 35.729000 440.986396 
 127.185111 35.729000 439.548691 
 127.185333 35.729000 438.555651 
 127.185444 35.729000 438.226391 
 127.185556 35.729000 438.009291 
 127.185667 35.729000 437.904312 
 127.184556 35.729111 445.444979 
 127.184667 35.729111 444.275321 
 127.184778 35.729111 443.215068 
 127.184889 35.729111 442.266044 
 127.185111 35.729111 440.699272 
 127.185333 35.729111 439.576694 
 127.185444 35.729111 439.182461 
 127.185556 35.729111 438.900321 
 127.185667 35.729111 438.730131 
 127.184667 35.729111 444.275321 
 127.184778 35.729111 443.215068 
 127.184889 35.729111 442.266044 
 127.185000 35.729111 441.426939 
 127.185222 35.729111 440.082120 
 127.185444 35.729111 439.182461 
 127.185556 35.729111 438.900321 
 127.185667 35.729111 438.730131 
 127.185778 35.729111 438.672478 
 127.184667 35.729222 445.705092 
 127.184778 35.729222 444.580521 
 127.184889 35.729222 443.567114 
 127.185000 35.729222 442.663461 
 127.185222 35.729222 441.189247 
 127.185444 35.729222 440.159725 
 127.185556 35.729222 439.812502 
 127.185667 35.729222 439.577060 
 127.185778 35.729222 439.454087 
 127.184667 35.729333 447.153892 
 127.184778 35.729333 445.965064 
 127.184889 35.729333 444.887335 
 127.185000 35.729333 443.919197 
 127.185222 35.729333 442.315717 
 127.185444 35.729333 441.156467 
 127.185556 35.729333 440.744230 
 127.185667 35.729333 440.443606 
 127.185778 35.729333 440.255384 
 127.184667 35.729444 448.626728 
 127.184778 35.729444 447.373481 
 127.184889 35.729444 446.231271 
 127.185000 35.729444 445.198487 
 127.185222 35.729444 443.465426 
 127.185444 35.729444 442.176136 
 127.185556 35.729444 441.698731 
 127.185667 35.729444 441.332772 
 127.185778 35.729444 441.079149 
 127.184778 35.729444 447.373481 
 127.184889 35.729444 446.231271 
 127.185000 35.729444 445.198487 
 127.185111 35.729444 444.276947 
 127.185333 35.729444 442.765435 
 127.185556 35.729444 441.698731 
 127.185667 35.729444 441.332772 
 127.185778 35.729444 441.079149 
 127.185889 35.729444 440.937803 
 127.184778 35.729555 448.800952 
 127.184889 35.729555 447.594322 
 127.185000 35.729555 446.496956 
 127.185111 35.729555 445.510772 
 127.185333 35.729555 443.869582 
 127.185556 35.729555 442.672744 
 127.185667 35.729555 442.241520 
 127.185778 35.729555 441.922568 
 127.185889 35.729555 441.715726 
 127.184778 35.729667 450.252414 
 127.184889 35.729667 448.981203 
 127.185000 35.729667 447.819095 
 127.185111 35.729667 446.768108 
 127.185333 35.729667 444.996925 
 127.185556 35.729667 443.669643 
 127.185667 35.729667 443.173000 
 127.185778 35.729667 442.788566 
 127.185889 35.729667 442.516075 
 127.184889 35.729667 448.981203 
 127.185000 35.729667 447.819095 
 127.185111 35.729667 446.768108 
 127.185222 35.729667 445.826813 
 127.185444 35.729667 444.277400 
 127.185667 35.729667 443.173000 
 127.185778 35.729667 442.788566 
 127.185889 35.729667 442.516075 
 127.186000 35.729667 442.356309 
 127.184889 35.729778 450.387169 
 127.185000 35.729778 449.160381 
 127.185111 35.729778 448.044655 
 127.185222 35.729778 447.038461 
 127.185444 35.729778 445.358963 
 127.185667 35.729778 444.124031 
 127.185778 35.729778 443.674187 
 127.185889 35.729778 443.336120 
 127.186000 35.729778 443.110716 
 127.184889 35.729889 451.817083 
 127.185000 35.729889 450.525455 
 127.185111 35.729889 449.344831 
 127.185222 35.729889 448.273578 
 127.185444 35.729889 446.463684 
 127.185667 35.729889 445.097910 
 127.185778 35.729889 444.582502 
 127.185889 35.729889 444.178707 
 127.186000 35.729889 443.887512 
 127.185000 35.729889 450.525455 
 127.185111 35.729889 449.344831 
 127.185222 35.729889 448.273578 
 127.185333 35.729889 447.313612 
 127.185556 35.729889 445.725404 
 127.185778 35.729889 444.582502 
 127.185889 35.729889 444.178707 
 127.186000 35.729889 443.887512 
 127.186111 35.729889 443.708835 
 127.185000 35.730000 451.912050 
 127.185111 35.730000 450.666481 
 127.185222 35.730000 449.530122 
 127.185333 35.730000 448.504993 
 127.185556 35.730000 446.786078 
 127.185778 35.730000 445.512027 
 127.185889 35.730000 445.042465 
 127.186000 35.730000 444.685441 
 127.186111 35.730000 444.440770 
 127.185000 35.730111 453.317752 
 127.185111 35.730111 452.007301 
 127.185222 35.730111 450.805903 
 127.185333 35.730111 449.715677 
 127.185556 35.730111 447.866193 
 127.185778 35.730111 446.461135 
 127.185889 35.730111 445.925877 
 127.186000 35.730111 445.503099 
 127.186111 35.730111 445.192509 
 127.185111 35.730111 452.007301 
 127.185222 35.730111 450.805903 
 127.185333 35.730111 449.715677 
 127.185444 35.730111 448.735169 
 127.185667 35.730111 447.107680 
 127.185889 35.730111 445.925877 
 127.186000 35.730111 445.503099 
 127.186111 35.730111 445.192509 
 127.186222 35.730111 444.994987 
 127.185111 35.730222 453.371933 
 127.185222 35.730222 452.105336 
 127.185333 35.730222 450.949856 
 127.185444 35.730222 449.903936 
 127.185667 35.730222 448.145348 
 127.185889 35.730222 446.832010 
 127.186000 35.730222 446.343325 
 127.186111 35.730222 445.966666 
 127.186222 35.730222 445.703014 
 127.185111 35.730333 454.755713 
 127.185222 35.730333 453.423983 
 127.185333 35.730333 452.203315 
 127.185444 35.730333 451.092050 
 127.185667 35.730333 449.202504 
 127.185889 35.730333 447.757775 
 127.186000 35.730333 447.203257 
 127.186111 35.730333 446.760604 
 127.186222 35.730333 446.430899 
 127.185111 35.730444 456.163432 
 127.185222 35.730444 454.766409 
 127.185333 35.730444 453.480395 
 127.185444 35.730444 452.303628 
 127.185667 35.730444 450.282811 
 127.185889 35.730444 448.706384 
 127.186000 35.730444 448.085881 
 127.186111 35.730444 447.577082 
 127.186222 35.730444 447.181174 
 127.185222 35.730444 454.766409 
 127.185333 35.730444 453.480395 
 127.185444 35.730444 452.303628 
 127.185556 35.730444 451.238226 
 127.185778 35.730444 449.439194 
 127.186000 35.730444 448.085881 
 127.186111 35.730444 447.577082 
 127.186222 35.730444 447.181174 
 127.186333 35.730444 446.897944 
 127.185222 35.730555 456.128029 
 127.185333 35.730555 454.776736 
 127.185444 35.730555 453.534534 
 127.185556 35.730555 452.403644 
 127.185778 35.730555 450.473270 
 127.186000 35.730555 448.988190 
 127.186111 35.730555 448.413321 
 127.186222 35.730555 447.951286 
 127.186333 35.730555 447.601769 
 127.185222 35.730667 457.513558 
 127.185333 35.730667 456.096826 
 127.185444 35.730667 454.789032 
 127.185556 35.730667 453.592498 
 127.185778 35.730667 451.530472 
 127.186000 35.730667 449.913318 
 127.186111 35.730667 449.272227 
 127.186222 35.730667 448.743914 
 127.186333 35.730667 448.327958 
 127.185333 35.730667 456.096826 
 127.185444 35.730667 454.789032 
 127.185556 35.730667 453.592498 
 127.185667 35.730667 452.505640 
 127.185889 35.730667 450.665796 
 127.186111 35.730667 449.272227 
 127.186222 35.730667 448.743914 
 127.186333 35.730667 448.327958 
 127.186444 35.730667 448.025437 
 127.185333 35.730778 457.438484 
 127.185444 35.730778 456.065053 
 127.185556 35.730778 454.802830 
 127.185667 35.730778 453.650129 
 127.185889 35.730778 451.678340 
 127.186111 35.730778 450.152406 
 127.186222 35.730778 449.557778 
 127.186333 35.730778 449.075348 
 127.186444 35.730778 448.706296 
 127.185333 35.730889 458.799377 
 127.185444 35.730889 457.360376 
 127.185556 35.730889 456.032534 
 127.185667 35.730889 454.814061 
 127.185889 35.730889 452.710471 
 127.186111 35.730889 451.052321 
 127.186222 35.730889 450.391454 
 127.186333 35.730889 449.842627 
 127.186444 35.730889 449.407125 
 127.185444 35.730889 457.360376 
 127.185556 35.730889 456.032534 
 127.185667 35.730889 454.814061 
 127.185778 35.730889 453.707175 
 127.186000 35.730889 451.825859 
 127.186222 35.730889 450.391454 
 127.186333 35.730889 449.842627 
 127.186444 35.730889 449.407125 
 127.186556 35.730889 449.084706 
 127.185444 35.731000 458.679493 
 127.185556 35.731000 457.285874 
 127.185667 35.731000 456.001472 
 127.185778 35.731000 454.828607 
 127.186000 35.731000 452.814976 
 127.186222 35.731000 451.247841 
 127.186333 35.731000 450.632467 
 127.186444 35.731000 450.130363 
 127.186556 35.731000 449.741185 
 127.185444 35.731111 460.017901 
 127.185556 35.731111 458.558574 
 127.185667 35.731111 457.208313 
 127.185778 35.731111 455.969541 
 127.186000 35.731111 453.823740 
 127.186222 35.731111 452.124027 
 127.186333 35.731111 451.442183 
 127.186444 35.731111 450.873557 
 127.186556 35.731111 450.417700 
 127.185556 35.731111 458.558574 
 127.185667 35.731111 457.208313 
 127.185778 35.731111 455.969541 
 127.185889 35.731111 454.840645 
 127.186111 35.731111 452.917599 
 127.186333 35.731111 451.442183 
 127.186444 35.731111 450.873557 
 127.186556 35.731111 450.417700 
 127.186667 35.731111 450.075784 
 127.185556 35.731222 459.855047 
 127.185667 35.731222 458.438770 
 127.185778 35.731222 457.133935 
 127.185889 35.731222 455.938824 
 127.186111 35.731222 453.883098 
 127.186333 35.731222 452.274594 
 127.186444 35.731222 451.639296 
 127.186556 35.731222 451.116609 
 127.186667 35.731222 450.707812 
 127.185556 35.731333 461.170871 
 127.185667 35.731333 459.688648 
 127.185778 35.731333 458.317821 
 127.185889 35.731333 457.056567 
 127.186111 35.731333 454.868310 
 127.186333 35.731333 453.126871 
 127.186444 35.731333 452.424979 
 127.186556 35.731333 451.835543 
 127.186667 35.731333 451.359945 
 127.185667 35.731333 459.688648 
 127.185778 35.731333 458.317821 
 127.185889 35.731333 457.056567 
 127.186000 35.731333 455.907209 
 127.186222 35.731333 453.941881 
 127.186444 35.731333 452.424979 
 127.186556 35.731333 451.835543 
 127.186667 35.731333 451.359945 
 127.186778 35.731333 450.997915 
 127.185667 35.731444 460.962283 
 127.185778 35.731444 459.525307 
 127.185889 35.731444 458.197756 
 127.186000 35.731444 456.982054 
 127.186222 35.731444 454.883686 
 127.186444 35.731444 453.233344 
 127.186556 35.731444 452.577009 
 127.186667 35.731444 452.034462 
 127.186778 35.731444 451.605326 
 127.185667 35.731555 462.255332 
 127.185778 35.731555 460.752279 
 127.185889 35.731555 459.358502 
 127.186000 35.731555 458.076529 
 127.186222 35.731555 455.845274 
 127.186444 35.731555 454.061647 
 127.186556 35.731555 453.338493 
 127.186667 35.731555 452.729077 
 127.186778 35.731555 452.232917 
 127.185667 35.731667 463.572281 
 127.185778 35.731667 462.002995 
 127.185889 35.731667 460.542836 
 127.186000 35.731667 459.194438 
 127.186222 35.731667 456.829988 
 127.186444 35.731667 454.912772 
 127.186556 35.731667 454.122648 
 127.186667 35.731667 453.446214 
 127.186778 35.731667 452.882883 
 127.185778 35.731667 462.002995 
 127.185889 35.731667 460.542836 
 127.186000 35.731667 459.194438 
 127.186111 35.731667 457.956048 
 127.186333 35.731667 455.814893 
 127.186556 35.731667 454.122648 
 127.186667 35.731667 453.446214 
 127.186778 35.731667 452.882883 
 127.186889 35.731667 452.434028 
 127.185778 35.731778 463.275397 
 127.185889 35.731778 461.748816 
 127.186000 35.731778 460.333951 
 127.186111 35.731778 459.028946 
 127.186333 35.731778 456.754324 
 127.186556 35.731778 454.928219 
 127.186667 35.731778 454.184732 
 127.186778 35.731778 453.554195 
 127.186889 35.731778 453.038086 
 127.185778 35.731889 464.567281 
 127.185889 35.731889 462.974348 
 127.186000 35.731889 461.493090 
 127.186111 35.731889 460.121545 
 127.186333 35.731889 457.713608 
 127.186556 35.731889 455.753801 
 127.186667 35.731889 454.943342 
 127.186778 35.731889 454.245681 
 127.186889 35.731889 453.662401 
 127.185889 35.731889 462.974348 
 127.186000 35.731889 461.493090 
 127.186111 35.731889 460.121545 
 127.186222 35.731889 458.862244 
 127.186444 35.731889 456.677857 
 127.186667 35.731889 454.943342 
 127.186778 35.731889 454.245681 
 127.186889 35.731889 453.662401 
 127.187000 35.731889 453.193094 
 127.185889 35.732000 464.223690 
 127.186000 35.732000 462.675883 
 127.186111 35.732000 461.237644 
 127.186222 35.732000 459.911605 
 127.186444 35.732000 457.593406 
 127.186667 35.732000 455.724692 
 127.186778 35.732000 454.959757 
 127.186889 35.732000 454.309157 
 127.187000 35.732000 453.772378 
 127.185889 35.732111 465.492586 
 127.186000 35.732111 463.878304 
 127.186111 35.732111 462.373444 
 127.186222 35.732111 460.980744 
 127.186444 35.732111 458.528888 
 127.186667 35.732111 456.526133 
 127.186778 35.732111 455.694006 
 127.186889 35.732111 454.976169 
 127.187000 35.732111 454.372002 
 127.186000 35.732111 463.878304 
 127.186111 35.732111 462.373444 
 127.186222 35.732111 460.980744 
 127.186333 35.732111 459.698417 
 127.186556 35.732111 457.470756 
 127.186778 35.732111 455.694006 
 127.186889 35.732111 454.976169 
 127.187000 35.732111 454.372002 
 127.187111 35.732111 453.882975 
 127.186000 35.732222 465.104530 
 127.186111 35.732222 463.532895 
 127.186222 35.732222 462.073380 
 127.186333 35.732222 460.724091 
 127.186556 35.732222 458.362278 
 127.186778 35.732222 456.450994 
 127.186889 35.732222 455.665771 
 127.187000 35.732222 454.994067 
 127.187111 35.732222 454.437458 
 127.186000 35.732333 466.350387 
 127.186111 35.732333 464.712051 
 127.186222 35.732333 463.185795 
 127.186333 35.732333 461.769623 
 127.186556 35.732333 459.273814 
 127.186778 35.732333 457.228158 
 127.186889 35.732333 456.375631 
 127.187000 35.732333 455.636474 
 127.187111 35.732333 455.012367 
 127.186111 35.732333 464.712051 
 127.186222 35.732333 463.185795 
 127.186333 35.732333 461.769623 
 127.186444 35.732333 460.466166 
 127.186667 35.732333 458.194886 
 127.186889 35.732333 456.375631 
 127.187000 35.732333 455.636474 
 127.187111 35.732333 455.012367 
 127.187222 35.732333 454.502870 
 127.186111 35.732444 465.915011 
 127.186222 35.732444 464.321861 
 127.186333 35.732444 462.838650 
 127.186444 35.732444 461.468116 
 127.186667 35.732444 459.062350 
 127.186889 35.732444 457.108232 
 127.187000 35.732444 456.301474 
 127.187111 35.732444 455.609721 
 127.187222 35.732444 455.032428 
 127.186111 35.732556 467.139806 
 127.186222 35.732556 465.479722 
 127.186333 35.732556 463.929434 
 127.186444 35.732556 462.491785 
 127.186667 35.732556 459.951460 
 127.186889 35.732556 457.862411 
 127.187000 35.732556 456.988018 
 127.187111 35.732556 456.228588 
 127.187222 35.732556 455.583468 
 127.186222 35.732556 465.479722 
 127.186333 35.732556 463.929434 
 127.186444 35.732556 462.491785 
 127.186556 35.732556 461.164951 
 127.186778 35.732556 458.849876 
 127.187000 35.732556 456.988018 
 127.187111 35.732556 456.228588 
 127.187222 35.732556 455.583468 
 127.187333 35.732556 455.054225 
 127.186222 35.732667 466.657373 
 127.186333 35.732667 465.040085 
 127.186444 35.732667 463.535398 
 127.186556 35.732667 462.141383 
 127.186778 35.732667 459.691725 
 127.187000 35.732667 457.694912 
 127.187111 35.732667 456.867889 
 127.187222 35.732667 456.155029 
 127.187333 35.732667 455.558001 
 127.186222 35.732778 467.858912 
 127.186333 35.732778 466.174468 
 127.186444 35.732778 464.602591 
 127.186556 35.732778 463.141242 
 127.186778 35.732778 460.556698 
 127.187000 35.732778 458.424630 
 127.187111 35.732778 457.529867 
 127.187222 35.732778 456.749118 
 127.187333 35.732778 456.084160 
 127.186333 35.732889 467.328730 
 127.186444 35.732889 465.689738 
 127.186556 35.732889 464.161135 
 127.186667 35.732889 462.745762 
 127.186889 35.732889 460.251969 
 127.187111 35.732889 458.212289 
 127.187222 35.732889 457.363736 
 127.187333 35.732889 456.630934 
 127.187444 35.732889 456.013301 
 127.186333 35.733000 468.506885 
 127.186444 35.733000 466.800626 
 127.186556 35.733000 465.204615 
 127.186667 35.733000 463.721799 
 127.186889 35.733000 461.092797 
 127.187111 35.733000 458.917545 
 127.187222 35.733000 458.001041 
 127.187333 35.733000 457.200247 
 127.187444 35.733000 456.514476 
 127.186333 35.733111 469.704932 
 127.186444 35.733111 467.931482 
 127.186556 35.733111 466.268141 
 127.186667 35.733111 464.717961 
 127.186889 35.733111 461.953913 
 127.187111 35.733111 459.643256 
 127.187222 35.733111 458.658886 
 127.187333 35.733111 457.790187 
 127.187444 35.733111 457.036364 
 127.186444 35.733111 467.931482 
 127.186556 35.733111 466.268141 
 127.186667 35.733111 464.717961 
 127.186778 35.733111 463.278973 
 127.187000 35.733111 460.741202 
 127.187222 35.733111 458.658886 
 127.187333 35.733111 457.790187 
 127.187444 35.733111 457.036364 
 127.187556 35.733111 456.399184 
 127.186444 35.733222 469.086244 
 127.186556 35.733222 467.355420 
 127.186667 35.733222 465.737723 
 127.186778 35.733222 464.231078 
 127.187000 35.733222 461.557781 
 127.187222 35.733222 459.339580 
 127.187333 35.733222 458.402828 
 127.187444 35.733222 457.580807 
 127.187556 35.733222 456.875388 
 127.186444 35.733333 470.263029 
 127.186556 35.733333 468.464684 
 127.186667 35.733333 466.779433 
 127.186778 35.733333 465.205096 
 127.187000 35.733333 462.396204 
 127.187222 35.733333 460.042054 
 127.187333 35.733333 459.037218 
 127.187444 35.733333 458.146968 
 127.187556 35.733333 457.373281 
 127.186556 35.733333 468.464684 
 127.186667 35.733333 466.779433 
 127.186778 35.733333 465.205096 
 127.186889 35.733333 463.744617 
 127.187111 35.733333 461.162484 
 127.187333 35.733333 459.037218 
 127.187444 35.733333 458.146968 
 127.187556 35.733333 457.373281 
 127.187667 35.733333 456.715545 
 127.186556 35.733444 469.594019 
 127.186667 35.733444 467.841294 
 127.186778 35.733444 466.199343 
 127.186889 35.733444 464.671220 
 127.187111 35.733444 461.953481 
 127.187333 35.733444 459.692256 
 127.187444 35.733444 458.733865 
 127.187556 35.733444 457.891999 
 127.187667 35.733444 457.165937 
 127.186556 35.733556 470.747358 
 127.186667 35.733556 468.927005 
 127.186778 35.733556 467.217290 
 127.186889 35.733556 465.621369 
 127.187111 35.733556 462.767725 
 127.187333 35.733556 460.370243 
 127.187444 35.733556 459.343562 
 127.187556 35.733556 458.433370 
 127.187667 35.733556 457.638838 
 127.186667 35.733556 468.927005 
 127.186778 35.733556 467.217290 
 127.186889 35.733556 465.621369 
 127.187000 35.733556 464.137235 
 127.187222 35.733556 461.511223 
 127.187444 35.733556 459.343562 
 127.187556 35.733556 458.433370 
 127.187667 35.733556 457.638838 
 127.187778 35.733556 456.961826 
 127.186667 35.733667 470.032886 
 127.186778 35.733667 468.255486 
 127.186889 35.733667 466.591849 
 127.187000 35.733667 465.039861 
 127.187222 35.733667 462.277936 
 127.187444 35.733667 459.974013 
 127.187556 35.733667 458.995583 
 127.187667 35.733667 458.132669 
 127.187778 35.733667 457.387237 
 127.186667 35.733778 471.162790 
 127.186778 35.733778 469.317552 
 127.186889 35.733778 467.586048 
 127.187000 35.733778 465.966054 
 127.187222 35.733778 463.067917 
 127.187444 35.733778 460.627434 
 127.187556 35.733778 459.580619 
 127.187667 35.733778 458.649176 
 127.187778 35.733778 457.835179 
 127.186778 35.733778 469.317552 
 127.186889 35.733778 467.586048 
 127.187000 35.733778 465.966054 
 127.187111 35.733778 464.460621 
 127.187333 35.733778 461.790668 
 127.187556 35.733778 459.580619 
 127.187667 35.733778 458.649176 
 127.187778 35.733778 457.835179 
 127.187889 35.733778 457.137981 
 127.186778 35.733889 470.399889 
 127.186889 35.733889 468.600597 
 127.187000 35.733889 466.912681 
 127.187111 35.733889 465.339295 
 127.187333 35.733889 462.533125 
 127.187556 35.733889 460.186515 
 127.187667 35.733889 459.186632 
 127.187778 35.733889 458.304160 
 127.187889 35.733889 457.538342 
 127.186778 35.734000 471.506272 
 127.186889 35.734000 469.639041 
 127.187000 35.734000 467.883049 
 127.187111 35.734000 466.241559 
 127.187333 35.734000 463.298875 
 127.187556 35.734000 460.815406 
 127.187667 35.734000 459.746937 
 127.187778 35.734000 458.795843 
 127.187889 35.734000 457.961260 
 127.186889 35.734000 469.639041 
 127.187000 35.734000 467.883049 
 127.187111 35.734000 466.241559 
 127.187222 35.734000 464.712520 
 127.187444 35.734000 461.998965 
 127.187667 35.734000 459.746937 
 127.187778 35.734000 458.795843 
 127.187889 35.734000 457.961260 
 127.188000 35.734000 457.245142 
 127.186889 35.734111 470.697860 
 127.187000 35.734111 468.873875 
 127.187111 35.734111 467.164363 
 127.187222 35.734111 465.567167 
 127.187444 35.734111 462.717097 
 127.187667 35.734111 460.328213 
 127.187778 35.734111 459.308587 
 127.187889 35.734111 458.405330 
 127.188000 35.734111 457.620501 
 127.186889 35.734222 471.780750 
 127.187000 35.734222 469.888620 
 127.187111 35.734222 468.110935 
 127.187222 35.734222 466.445431 
 127.187444 35.734222 463.458548 
 127.187667 35.734222 460.932512 
 127.187778 35.734222 459.844207 
 127.187889 35.734222 458.872130 
 127.188000 35.734222 458.018446 
 127.187000 35.734222 469.888620 
 127.187111 35.734222 468.110935 
 127.187222 35.734222 466.445431 
 127.187333 35.734222 464.895259 
 127.187556 35.734222 462.138125 
 127.187778 35.734222 459.844207 
 127.187889 35.734222 458.872130 
 127.188000 35.734222 458.018446 
 127.188111 35.734222 457.282476 
 127.187000 35.734333 470.925650 
 127.187111 35.734333 469.079757 
 127.187222 35.734333 467.345911 
 127.187333 35.734333 465.727369 
 127.187556 35.734333 462.833191 
 127.187778 35.734333 460.401890 
 127.187889 35.734333 459.360964 
 127.188000 35.734333 458.438399 
 127.188111 35.734333 457.633404 
 127.187000 35.734444 471.983178 
 127.187111 35.734444 470.069161 
 127.187222 35.734444 468.267056 
 127.187333 35.734444 466.580228 
 127.187556 35.734444 463.549179 
 127.187778 35.734444 460.980672 
 127.187889 35.734444 459.870988 
 127.188000 35.734444 458.879632 
 127.188111 35.734444 458.005705 
 127.187000 35.734556 473.064898 
 127.187111 35.734556 471.082603 
 127.187222 35.734556 469.212089 
 127.187333 35.734556 467.456825 
 127.187556 35.734556 464.288606 
 127.187778 35.734556 461.582597 
 127.187889 35.734556 460.404009 
 127.188000 35.734556 459.343716 
 127.188111 35.734556 458.400711 
 127.187111 35.734556 471.082603 
 127.187222 35.734556 469.212089 
 127.187333 35.734556 467.456825 
 127.187444 35.734556 465.814615 
 127.187667 35.734556 462.876994 
 127.187889 35.734556 460.404009 
 127.188000 35.734556 459.343716 
 127.188111 35.734556 458.400711 
 127.188222 35.734556 457.577144 
 127.187111 35.734667 472.116657 
 127.187222 35.734667 470.177816 
 127.187333 35.734667 468.354201 
 127.187444 35.734667 466.643506 
 127.187667 35.734667 463.568724 
 127.187889 35.734667 460.958247 
 127.188000 35.734667 459.829108 
 127.188111 35.734667 458.817118 
 127.188222 35.734667 457.924532 
 127.187111 35.734778 473.174936 
 127.187222 35.734778 471.167617 
 127.187333 35.734778 469.275499 
 127.187444 35.734778 467.496168 
 127.187667 35.734778 464.283927 
 127.187889 35.734778 461.535664 
 127.188000 35.734778 460.337533 
 127.188111 35.734778 459.256411 
 127.188222 35.734778 458.294662 
 127.187222 35.734778 471.167617 
 127.187333 35.734778 469.275499 
 127.187444 35.734778 467.496168 
 127.187556 35.734778 465.832984 
 127.187778 35.734778 462.852028 
 127.188000 35.734778 460.337533 
 127.188111 35.734778 459.256411 
 127.188222 35.734778 458.294662 
 127.188333 35.734778 457.451464 
 127.187222 35.734889 472.178144 
 127.187333 35.734889 470.217607 
 127.187444 35.734889 468.369726 
 127.187556 35.734889 466.637967 
 127.187778 35.734889 463.519565 
 127.188000 35.734889 460.867296 
 127.188111 35.734889 459.717134 
 127.188222 35.734889 458.686315 
 127.188333 35.734889 457.773906 
 127.187222 35.735000 473.212932 
 127.187333 35.735000 471.183825 
 127.187444 35.735000 469.267243 
 127.187556 35.735000 467.466759 
 127.187778 35.735000 464.210614 
 127.188000 35.735000 461.420275 
 127.188111 35.735000 460.200928 
 127.188222 35.735000 459.100893 
 127.188333 35.735000 458.119128 
 127.187333 35.735000 471.183825 
 127.187444 35.735000 469.267243 
 127.187556 35.735000 467.466759 
 127.187667 35.735000 465.780134 
 127.187889 35.735000 462.756356 
 127.188111 35.735000 460.200928 
 127.188222 35.735000 459.100893 
 127.188333 35.735000 458.119128 
 127.188444 35.735000 457.257872 
 127.187333 35.735111 472.172607 
 127.187444 35.735111 470.187291 
 127.187556 35.735111 468.318049 
 127.187667 35.735111 466.562534 
 127.187889 35.735111 463.400792 
 127.188111 35.735111 460.707074 
 127.188222 35.735111 459.537796 
 127.188333 35.735111 458.486650 
 127.188444 35.735111 457.555981 
 127.187333 35.735222 473.182253 
 127.187444 35.735222 471.128287 
 127.187556 35.735222 469.190374 
 127.187667 35.735222 467.366056 
 127.187889 35.735222 464.066526 
 127.188111 35.735222 461.234699 
 127.188222 35.735222 459.996271 
 127.188333 35.735222 458.875837 
 127.188444 35.735222 457.875850 
 127.187444 35.735222 471.128287 
 127.187556 35.735222 469.190374 
 127.187667 35.735222 467.366056 
 127.187778 35.735222 465.658793 
 127.188000 35.735222 462.592382 
 127.188222 35.735222 459.996271 
 127.188333 35.735222 458.875837 
 127.188444 35.735222 457.875850 
 127.188556 35.735222 456.995456 
 127.187444 35.735333 472.093529 
 127.187556 35.735333 470.086793 
 127.187667 35.735333 468.193522 
 127.187778 35.735333 466.417284 
 127.188000 35.735333 463.212629 
 127.188222 35.735333 460.477952 
 127.188333 35.735333 459.288085 
 127.188444 35.735333 458.218635 
 127.188556 35.735333 457.268639 
 127.187444 35.735444 473.079758 
 127.187556 35.735444 471.004285 
 127.187667 35.735444 469.042148 
 127.187778 35.735444 467.197021 
 127.188000 35.735444 463.854302 
 127.188222 35.735444 460.981242 
 127.188333 35.735444 459.722034 
 127.188444 35.735444 458.583215 
 127.188556 35.735444 457.563711 
 127.187556 35.735444 471.004285 
 127.187667 35.735444 469.042148 
 127.187778 35.735444 467.197021 
 127.187889 35.735444 465.466624 
 127.188111 35.735444 462.358171 
 127.188333 35.735444 459.722034 
 127.188444 35.735444 458.583215 
 127.188556 35.735444 457.563711 
 127.188667 35.735444 456.665847 
 127.187556 35.735556 471.946066 
 127.187667 35.735556 469.914913 
 127.187778 35.735556 468.000747 
 127.187889 35.735556 466.201182 
 127.188111 35.735556 462.954210 
 127.188333 35.735556 460.179234 
 127.188444 35.735556 458.970902 
 127.188556 35.735556 457.881746 
 127.188667 35.735556 456.914200 
 127.187556 35.735667 472.908960 
 127.187667 35.735667 470.808876 
 127.187778 35.735667 468.825760 
 127.187889 35.735667 466.957113 
 127.188111 35.735667 463.571804 
 127.188333 35.735667 460.658174 
 127.188444 35.735667 459.380420 
 127.188556 35.735667 458.221708 
 127.188667 35.735667 457.184576 
 127.187667 35.735667 470.808876 
 127.187778 35.735667 468.825760 
 127.187889 35.735667 466.957113 
 127.188000 35.735667 465.206495 
 127.188222 35.735667 462.056263 
 127.188444 35.735667 459.380420 
 127.188556 35.735667 458.221708 
 127.188667 35.735667 457.184576 
 127.188778 35.735667 456.268139 
 127.187667 35.735778 471.727176 
 127.187778 35.735778 469.674958 
 127.187889 35.735778 467.737082 
 127.188000 35.735778 465.917211 
 127.188222 35.735778 462.628190 
 127.188444 35.735778 459.813240 
 127.188556 35.735778 458.584825 
 127.188667 35.735778 457.477963 
 127.188778 35.735778 456.491657 
 127.187667 35.735889 472.666717 
 127.187778 35.735889 470.545485 
 127.187889 35.735889 468.538467 
 127.188000 35.735889 466.649433 
 127.188222 35.735889 463.221803 
 127.188444 35.735889 460.267931 
 127.188556 35.735889 458.969908 
 127.188667 35.735889 457.793411 
 127.188778 35.735889 456.737334 
 127.187778 35.735889 470.545485 
 127.187889 35.735889 468.538467 
 127.188000 35.735889 466.649433 
 127.188111 35.735889 464.876066 
 127.188333 35.735889 461.684725 
 127.188556 35.735889 458.969908 
 127.188667 35.735889 457.793411 
 127.188778 35.735889 456.737334 
 127.188889 35.735889 455.804083 
 127.187778 35.736000 471.440398 
 127.187889 35.736000 469.364087 
 127.188000 35.736000 467.405742 
 127.188111 35.736000 465.562933 
 127.188333 35.736000 462.232533 
 127.188556 35.736000 459.378343 
 127.188667 35.736000 458.132067 
 127.188778 35.736000 457.006073 
 127.188889 35.736000 456.002877 
 127.187778 35.736111 472.358280 
 127.187889 35.736111 470.212646 
 127.188000 35.736111 468.184959 
 127.188111 35.736111 466.272678 
 127.188333 35.736111 462.803163 
 127.188556 35.736111 459.809547 
 127.188667 35.736111 458.493466 
 127.188778 35.736111 457.297531 
 127.188889 35.736111 456.224368 
 127.187778 35.736222 473.297558 
 127.187889 35.736222 471.082688 
 127.188000 35.736222 468.985747 
 127.188111 35.736222 467.004085 
 127.188333 35.736222 463.395637 
 127.188556 35.736222 460.262782 
 127.188667 35.736222 458.876990 
 127.188778 35.736222 457.611210 
 127.188889 35.736222 456.468175 
 127.187889 35.736222 471.082688 
 127.188000 35.736222 468.985747 
 127.188111 35.736222 467.004085 
 127.188222 35.736222 465.141465 
 127.188444 35.736222 461.770024 
 127.188667 35.736222 458.876990 
 127.188778 35.736222 457.611210 
 127.188889 35.736222 456.468175 
 127.189000 35.736222 455.446857 
 127.187889 35.736333 471.977272 
 127.188000 35.736333 469.810927 
 127.188111 35.736333 467.759734 
 127.188222 35.736333 465.827564 
 127.188444 35.736333 462.316743 
 127.188667 35.736333 459.284020 
 127.188778 35.736333 457.948250 
 127.188889 35.736333 456.735199 
 127.189000 35.736333 455.643730 
 127.187889 35.736444 472.893386 
 127.188000 35.736444 470.657725 
 127.188111 35.736444 468.537092 
 127.188222 35.736444 466.535461 
 127.188444 35.736444 462.885444 
 127.188667 35.736444 459.713220 
 127.188778 35.736444 458.307555 
 127.188889 35.736444 457.024585 
 127.189000 35.736444 455.863061 
 127.188000 35.736444 470.657725 
 127.188111 35.736444 468.537092 
 127.188222 35.736444 466.535461 
 127.188333 35.736444 464.650366 
 127.188556 35.736444 461.238630 
 127.188778 35.736444 458.307555 
 127.188889 35.736444 457.024585 
 127.189000 35.736444 455.863061 
 127.189111 35.736444 454.825579 
 127.188000 35.736556 471.529122 
 127.188111 35.736556 469.338897 
 127.188222 35.736556 467.267658 
 127.188333 35.736556 465.312826 
 127.188556 35.736556 461.761448 
 127.188778 35.736556 458.690425 
 127.188889 35.736556 457.337391 
 127.189000 35.736556 456.105667 
 127.189111 35.736556 454.997960 
 127.188000 35.736667 472.422188 
 127.188111 35.736667 470.162460 
 127.188222 35.736667 468.021702 
 127.188333 35.736667 465.997225 
 127.188556 35.736667 462.306389 
 127.188778 35.736667 459.095607 
 127.188889 35.736667 457.672605 
 127.189000 35.736667 456.370778 
 127.189111 35.736667 455.192944 
 127.188111 35.736667 470.162460 
 127.188222 35.736667 468.021702 
 127.188333 35.736667 465.997225 
 127.188444 35.736667 464.092883 
 127.188667 35.736667 460.641258 
 127.188889 35.736667 457.672605 
 127.189000 35.736667 456.370778 
 127.189111 35.736667 455.192944 
 127.189222 35.736667 454.138044 
 127.188111 35.736778 471.010681 
 127.188222 35.736778 468.800255 
 127.188333 35.736778 466.705982 
 127.188444 35.736778 464.731828 
 127.188667 35.736778 461.140302 
 127.188889 35.736778 458.031444 
 127.189000 35.736778 456.659370 
 127.189111 35.736778 455.411264 
 127.189222 35.736778 454.285957 
 127.188111 35.736889 471.882228 
 127.188222 35.736889 469.602103 
 127.188333 35.736889 467.438007 
 127.188444 35.736889 465.394012 
 127.188667 35.736889 461.662530 
 127.188889 35.736889 458.413415 
 127.189000 35.736889 456.971071 
 127.189111 35.736889 455.652670 
 127.189222 35.736889 454.456933 
 127.188222 35.736889 469.602103 
 127.188333 35.736889 467.438007 
 127.188444 35.736889 465.394012 
 127.188556 35.736889 463.467609 
 127.188778 35.736889 459.976670 
 127.189000 35.736889 456.971071 
 127.189111 35.736889 455.652670 
 127.189222 35.736889 454.456933 
 127.189333 35.736889 453.386536 
 127.188222 35.737000 470.425876 
 127.188333 35.737000 468.192047 
 127.188444 35.737000 466.078302 
 127.188556 35.737000 464.082024 
 127.188778 35.737000 460.451167 
 127.189000 35.737000 457.305349 
 127.189111 35.737000 455.916750 
 127.189222 35.737000 454.650682 
 127.189333 35.737000 453.509928 
 127.188222 35.737111 471.274477 
 127.188333 35.737111 468.970764 
 127.188444 35.737111 466.787122 
 127.188556 35.737111 464.720819 
 127.188778 35.737111 460.949750 
 127.189000 35.737111 457.663421 
 127.189111 35.737111 456.204480 
 127.189222 35.737111 454.867936 
 127.189333 35.737111 453.656682 
 127.188333 35.737111 468.970764 
 127.188444 35.737111 466.787122 
 127.188556 35.737111 464.720819 
 127.188667 35.737111 462.775803 
 127.188889 35.737111 459.246262 
 127.189111 35.737111 456.204480 
 127.189222 35.737111 454.867936 
 127.189333 35.737111 453.656682 
 127.189444 35.737111 452.569634 
 127.188333 35.737222 469.771551 
 127.188444 35.737222 467.518101 
 127.188556 35.737222 465.381865 
 127.188667 35.737222 463.366901 
 127.188889 35.737222 459.697189 
 127.189111 35.737222 456.514937 
 127.189222 35.737222 455.108014 
 127.189333 35.737222 453.826358 
 127.189444 35.737222 452.668774 
 127.188333 35.737333 470.597231 
 127.188444 35.737333 468.273824 
 127.188556 35.737333 466.067508 
 127.188667 35.737333 463.982447 
 127.188889 35.737333 460.172269 
 127.189111 35.737333 456.849255 
 127.189222 35.737333 455.371809 
 127.189333 35.737333 454.019608 
 127.189444 35.737333 452.791344 
 127.188444 35.737333 468.273824 
 127.188556 35.737333 466.067508 
 127.188667 35.737333 463.982447 
 127.188778 35.737333 462.016094 
 127.189000 35.737333 458.448833 
 127.189222 35.737333 455.371809 
 127.189333 35.737333 454.019608 
 127.189444 35.737333 452.791344 
 127.189556 35.737333 451.689768 
 127.188444 35.737444 469.051764 
 127.188556 35.737444 466.775458 
 127.188667 35.737444 464.620392 
 127.188778 35.737444 462.583909 
 127.189000 35.737444 458.876225 
 127.189222 35.737444 455.658481 
 127.189333 35.737444 454.235833 
 127.189444 35.737444 452.936988 
 127.189556 35.737444 451.764807 
 127.188444 35.737556 469.854666 
 127.188556 35.737556 467.508221 
 127.188667 35.737556 465.283002 
 127.188778 35.737556 463.176241 
 127.189000 35.737556 459.327841 
 127.189222 35.737556 455.969084 
 127.189333 35.737556 454.475844 
 127.189444 35.737556 453.106275 
 127.189556 35.737556 451.863346 
 127.188556 35.737556 467.508221 
 127.188667 35.737556 465.283002 
 127.188778 35.737556 463.176241 
 127.188889 35.737556 461.191974 
 127.189111 35.737556 457.587527 
 127.189333 35.737556 454.475844 
 127.189444 35.737556 453.106275 
 127.189556 35.737556 451.863346 
 127.189667 35.737556 450.745947 
 127.188556 35.737667 468.264670 
 127.188667 35.737667 465.969270 
 127.188778 35.737667 463.792202 
 127.188889 35.737667 461.737614 
 127.189111 35.737667 457.992253 
 127.189333 35.737667 454.739359 
 127.189444 35.737667 453.299042 
 127.189556 35.737667 451.985343 
 127.189667 35.737667 450.797039 
 127.188556 35.737778 469.043513 
 127.188667 35.737778 466.678023 
 127.188778 35.737778 464.430743 
 127.188889 35.737778 462.305927 
 127.189111 35.737778 458.419842 
 127.189333 35.737778 455.025932 
 127.189444 35.737778 453.514966 
 127.189556 35.737778 452.130596 
 127.189667 35.737778 450.871488 
 127.188667 35.737778 466.678023 
 127.188778 35.737778 464.430743 
 127.188889 35.737778 462.305927 
 127.189000 35.737778 460.300992 
 127.189222 35.737778 456.660305 
 127.189444 35.737778 453.514966 
 127.189556 35.737778 452.130596 
 127.189667 35.737778 450.871488 
 127.189778 35.737778 449.739628 
 127.188667 35.737889 467.411774 
 127.188778 35.737889 465.094132 
 127.188889 35.737889 462.898941 
 127.189000 35.737889 460.823504 
 127.189222 35.737889 457.041656 
 127.189444 35.737889 453.754859 
 127.189556 35.737889 452.299674 
 127.189667 35.737889 450.969618 
 127.189778 35.737889 449.766731 
 127.188667 35.738000 468.168072 
 127.188778 35.738000 465.780160 
 127.188889 35.738000 463.514687 
 127.189000 35.738000 461.368844 
 127.189222 35.738000 457.446025 
 127.189444 35.738000 454.017966 
 127.189556 35.738000 452.492066 
 127.189667 35.738000 451.091162 
 127.189778 35.738000 449.817348 
 127.188778 35.738111 466.491262 
 127.188889 35.738111 464.155357 
 127.189000 35.738111 461.938959 
 127.189111 35.738111 459.846302 
 127.189333 35.738111 456.028560 
 127.189556 35.738111 452.708503 
 127.189667 35.738111 451.236606 
 127.189778 35.738111 449.891723 
 127.189889 35.738111 448.675619 
 127.188778 35.738222 467.225065 
 127.188889 35.738222 464.818822 
 127.189000 35.738222 462.531964 
 127.189111 35.738222 460.368831 
 127.189333 35.738222 456.409875 
 127.189556 35.738222 452.948312 
 127.189667 35.738222 451.405523 
 127.189778 35.738222 449.989671 
 127.189889 35.738222 448.702575 
 127.188778 35.738333 467.984168 
 127.188889 35.738333 465.507438 
 127.189000 35.738333 463.149970 
 127.189111 35.738333 460.916216 
 127.189333 35.738333 456.815750 
 127.189556 35.738333 453.212390 
 127.189667 35.738333 451.598563 
 127.189778 35.738333 450.111598 
 127.189889 35.738333 448.753367 
 127.188889 35.738333 465.507438 
 127.189000 35.738333 463.149970 
 127.189111 35.738333 460.916216 
 127.189222 35.738333 458.803443 
 127.189444 35.738333 454.950819 
 127.189667 35.738333 451.598563 
 127.189778 35.738333 450.111598 
 127.189889 35.738333 448.753367 
 127.190000 35.738333 447.522613 
 127.188889 35.738444 466.218912 
 127.189000 35.738444 463.790929 
 127.189111 35.738444 461.486646 
 127.189222 35.738444 459.303222 
 127.189444 35.738444 455.309140 
 127.189667 35.738444 451.815136 
 127.189778 35.738444 450.257157 
 127.189889 35.738444 448.827893 
 127.190000 35.738444 447.525971 
 127.188889 35.738556 466.955768 
 127.189000 35.738556 464.457119 
 127.189111 35.738556 462.082160 
 127.189222 35.738556 459.827937 
 127.189444 35.738556 455.692102 
 127.189667 35.738556 452.056059 
 127.189778 35.738556 450.426922 
 127.189889 35.738556 448.926480 
 127.190000 35.738556 447.553248 
 127.189000 35.738556 464.457119 
 127.189111 35.738556 462.082160 
 127.189222 35.738556 459.827937 
 127.189333 35.738556 457.698764 
 127.189556 35.738556 453.811908 
 127.189778 35.738556 450.426922 
 127.189889 35.738556 448.926480 
 127.190000 35.738556 447.553248 
 127.190111 35.738556 446.310260 
 127.189000 35.738667 465.147534 
 127.189111 35.738667 462.701871 
 127.189222 35.738667 460.376821 
 127.189333 35.738667 458.176809 
 127.189556 35.738667 454.148009 
 127.189778 35.738667 450.620735 
 127.189889 35.738667 449.049093 
 127.190000 35.738667 447.604529 
 127.190111 35.738667 446.290188 
 127.189000 35.738778 465.860999 
 127.189111 35.738778 463.344726 
 127.189222 35.738778 460.948944 
 127.189333 35.738778 458.678189 
 127.189556 35.738778 454.507639 
 127.189778 35.738778 450.838275 
 127.189889 35.738778 449.195532 
 127.190000 35.738778 447.679737 
 127.190111 35.738778 446.294145 
 127.189111 35.738778 463.344726 
 127.189222 35.738778 460.948944 
 127.189333 35.738778 458.678189 
 127.189444 35.738778 456.529695 
 127.189667 35.738778 452.609674 
 127.189889 35.738778 449.195532 
 127.190000 35.738778 447.679737 
 127.190111 35.738778 446.294145 
 127.190222 35.738778 445.037475 
 127.189111 35.738889 464.013014 
 127.189222 35.738889 461.546352 
 127.189333 35.738889 459.204705 
 127.189444 35.738889 456.985195 
 127.189667 35.738889 452.922990 
 127.189889 35.738889 449.366376 
 127.190000 35.738889 447.779206 
 127.190111 35.738889 446.322218 
 127.190222 35.738889 444.994020 
 127.189111 35.739000 464.704514 
 127.189222 35.739000 462.167065 
 127.189333 35.739000 459.754622 
 127.189444 35.739000 457.464193 
 127.189667 35.739000 453.259999 
 127.189889 35.739000 449.561111 
 127.190000 35.739000 447.902665 
 127.190111 35.739000 446.374384 
 127.190222 35.739000 444.974759 
 127.189222 35.739000 462.167065 
 127.189333 35.739000 459.754622 
 127.189444 35.739000 457.464193 
 127.189556 35.739000 455.300176 
 127.189778 35.739000 451.346243 
 127.190000 35.739000 447.902665 
 127.190111 35.739000 446.374384 
 127.190222 35.739000 444.974759 
 127.190333 35.739000 443.706890 
 127.189222 35.739111 462.813299 
 127.189333 35.739111 460.329910 
 127.189444 35.739111 457.968414 
 127.189556 35.739111 455.733317 
 127.189778 35.739111 451.636905 
 127.190000 35.739111 448.050617 
 127.190111 35.739111 446.450896 
 127.190222 35.739111 444.979702 
 127.190333 35.739111 443.640241 
 127.189222 35.739222 463.482908 
 127.189333 35.739222 460.928669 
 127.189444 35.739222 458.496201 
 127.189556 35.739222 456.190121 
 127.189778 35.739222 451.951425 
 127.190000 35.739222 448.222626 
 127.190111 35.739222 446.551568 
 127.190222 35.739222 445.008905 
 127.190333 35.739222 443.597956 
 127.189333 35.739222 460.928669 
 127.189444 35.739222 458.496201 
 127.189556 35.739222 456.190121 
 127.189667 35.739222 454.007632 
 127.189889 35.739222 450.023810 
 127.190111 35.739222 446.551568 
 127.190222 35.739222 445.008905 
 127.190333 35.739222 443.597956 
 127.190444 35.739222 442.317423 
 127.189333 35.739333 461.553037 
 127.189444 35.739333 459.049448 
 127.189556 35.739333 456.672237 
 127.189667 35.739333 454.418494 
 127.189889 35.739333 450.292011 
 127.190111 35.739333 446.676820 
 127.190222 35.739333 445.062544 
 127.190333 35.739333 443.579963 
 127.190444 35.739333 442.227664 
 127.189333 35.739445 462.202082 
 127.189444 35.739445 459.627346 
 127.189556 35.739445 457.178978 
 127.189667 35.739445 454.853954 
 127.189889 35.739445 450.584761 
 127.190111 35.739445 446.826577 
 127.190222 35.739445 445.140667 
 127.190333 35.739445 443.586432 
 127.190444 35.739445 442.162347 
 127.189444 35.739445 459.627346 
 127.189556 35.739445 457.178978 
 127.189667 35.739445 454.853954 
 127.189778 35.739445 452.655076 
 127.190000 35.739445 448.640622 
 127.190222 35.739445 445.140667 
 127.190333 35.739445 443.586432 
 127.190444 35.739445 442.162347 
 127.190556 35.739445 440.871570 
 127.189444 35.739556 460.228916 
 127.189556 35.739556 457.709487 
 127.189667 35.739556 455.313280 
 127.189778 35.739556 453.043151 
 127.190000 35.739556 448.886044 
 127.190222 35.739556 445.243151 
 127.190333 35.739556 443.617364 
 127.190444 35.739556 442.121596 
 127.190556 35.739556 440.759115 
 127.189444 35.739667 460.856309 
 127.189556 35.739667 458.265669 
 127.189667 35.739667 455.798130 
 127.189778 35.739667 453.456603 
 127.190000 35.739667 449.156550 
 127.190222 35.739667 445.370427 
 127.190333 35.739667 443.672944 
 127.190444 35.739667 442.105348 
 127.190556 35.739667 440.671020 
 127.189556 35.739667 458.265669 
 127.189667 35.739667 455.798130 
 127.189778 35.739667 453.456603 
 127.189889 35.739667 451.243614 
 127.190111 35.739667 447.199550 
 127.190333 35.739667 443.672944 
 127.190444 35.739667 442.105348 
 127.190556 35.739667 440.671020 
 127.190667 35.739667 439.368644 
 127.189556 35.739778 458.845693 
 127.189667 35.739778 456.306918 
 127.189778 35.739778 453.894089 
 127.189889 35.739778 451.609788 
 127.190111 35.739778 447.422836 
 127.190333 35.739778 443.753057 
 127.190444 35.739778 442.113736 
 127.190556 35.739778 440.607663 
 127.190667 35.739778 439.233409 
 127.189556 35.739889 459.451634 
 127.189667 35.739889 456.841475 
 127.189778 35.739889 454.357196 
 127.189889 35.739889 452.001435 
 127.190111 35.739889 447.671300 
 127.190333 35.739889 443.858056 
 127.190444 35.739889 442.146865 
 127.190556 35.739889 440.568904 
 127.190667 35.739889 439.122629 
 127.189667 35.739889 456.841475 
 127.189778 35.739889 454.357196 
 127.189889 35.739889 452.001435 
 127.190000 35.739889 449.771349 
 127.190222 35.739889 445.698874 
 127.190444 35.739889 442.146865 
 127.190556 35.739889 440.568904 
 127.190667 35.739889 439.122629 
 127.190778 35.739889 437.811254 
 127.189667 35.740000 457.400043 
 127.189778 35.740000 454.844411 
 127.189889 35.740000 452.417287 
 127.190000 35.740000 450.115715 
 127.190222 35.740000 445.900118 
 127.190444 35.740000 442.204701 
 127.190556 35.740000 440.554953 
 127.190667 35.740000 439.036761 
 127.190778 35.740000 437.653447 
 127.189667 35.740111 457.984626 
 127.189778 35.740111 455.357492 
 127.189889 35.740111 452.858856 
 127.190000 35.740111 450.485651 
 127.190222 35.740111 446.126637 
 127.190444 35.740111 442.287521 
 127.190556 35.740111 440.565842 
 127.190667 35.740111 438.975588 
 127.190778 35.740111 437.520192 
 127.189778 35.740111 455.357492 
 127.189889 35.740111 452.858856 
 127.190000 35.740111 450.485651 
 127.190111 35.740111 448.242458 
 127.190333 35.740111 444.142394 
 127.190556 35.740111 440.565842 
 127.190667 35.740111 438.975588 
 127.190778 35.740111 437.520192 
 127.190889 35.740111 436.198329 
 127.189778 35.740222 455.894757 
 127.189889 35.740222 453.324707 
 127.190000 35.740222 450.879965 
 127.190111 35.740222 448.565226 
 127.190333 35.740222 444.321805 
 127.190556 35.740222 440.601612 
 127.190667 35.740222 438.939398 
 127.190778 35.740222 437.412024 
 127.190889 35.740222 436.018049 
 127.189778 35.740333 456.458136 
 127.189889 35.740333 453.816523 
 127.190000 35.740333 451.300097 
 127.190111 35.740333 448.913663 
 127.190333 35.740333 444.526592 
 127.190556 35.740333 440.662466 
 127.190667 35.740333 438.928147 
 127.190778 35.740333 437.328651 
 127.190889 35.740333 435.862420 
 127.189889 35.740333 453.816523 
 127.190000 35.740333 451.300097 
 127.190111 35.740333 448.913663 
 127.190222 35.740333 446.654351 
 127.190444 35.740333 442.527948 
 127.190667 35.740333 438.928147 
 127.190778 35.740333 437.328651 
 127.190889 35.740333 435.862420 
 127.191000 35.740333 434.532719 
 127.189889 35.740445 454.333607 
 127.190000 35.740445 451.745471 
 127.190111 35.740445 449.287317 
 127.190222 35.740445 446.956162 
 127.190444 35.740445 442.685922 
 127.190667 35.740445 438.941999 
 127.190778 35.740445 437.270359 
 127.190889 35.740445 435.731853 
 127.191000 35.740445 434.329855 
 127.189889 35.740556 454.875088 
 127.190000 35.740556 452.215339 
 127.190111 35.740556 449.685563 
 127.190222 35.740556 447.282664 
 127.190444 35.740556 442.868787 
 127.190667 35.740556 438.980945 
 127.190778 35.740556 437.237265 
 127.190889 35.740556 435.626586 
 127.191000 35.740556 434.152397 
 127.190000 35.740556 452.215339 
 127.190111 35.740556 449.685563 
 127.190222 35.740556 447.282664 
 127.190333 35.740556 445.011293 
 127.190556 35.740556 440.859413 
 127.190778 35.740556 437.237265 
 127.190889 35.740556 435.626586 
 127.191000 35.740556 434.152397 
 127.191111 35.740556 432.813361 
 127.190000 35.740667 452.711401 
 127.190111 35.740667 450.109854 
 127.190222 35.740667 447.635063 
 127.190333 35.740667 445.291789 
 127.190556 35.740667 440.995839 
 127.190778 35.740667 437.229335 
 127.190889 35.740667 435.546339 
 127.191000 35.740667 433.999814 
 127.191111 35.740667 432.588308 
 127.190000 35.740778 453.232036 
 127.190111 35.740778 450.558816 
 127.190222 35.740778 448.012230 
 127.190333 35.740778 445.597152 
 127.190556 35.740778 441.157333 
 127.190778 35.740778 437.246677 
 127.190889 35.740778 435.491469 
 127.191000 35.740778 433.872712 
 127.191111 35.740778 432.388840 
 127.190000 35.740889 453.779120 
 127.190111 35.740889 451.034077 
 127.190222 35.740889 448.415548 
 127.190333 35.740889 445.928518 
 127.190556 35.740889 441.344534 
 127.190778 35.740889 437.289435 
 127.190889 35.740889 435.461867 
 127.191000 35.740889 433.770733 
 127.191111 35.740889 432.214352 
 127.190111 35.740889 451.034077 
 127.190222 35.740889 448.415548 
 127.190333 35.740889 445.928518 
 127.190444 35.740889 443.569979 
 127.190667 35.740889 439.249614 
 127.190889 35.740889 435.461867 
 127.191000 35.740889 433.770733 
 127.191111 35.740889 432.214352 
 127.191222 35.740889 430.796146 
 127.190111 35.741000 451.534089 
 127.190222 35.741000 448.843715 
 127.190333 35.741000 446.284831 
 127.190444 35.741000 443.854315 
 127.190667 35.741000 439.389849 
 127.190889 35.741000 435.457718 
 127.191000 35.741000 433.694311 
 127.191111 35.741000 432.065525 
 127.191222 35.741000 430.574894 
 127.190111 35.741111 452.060658 
 127.190222 35.741111 449.298289 
 127.190333 35.741111 446.667401 
 127.190444 35.741111 444.164761 
 127.190667 35.741111 439.555898 
 127.190889 35.741111 435.479090 
 127.191000 35.741111 433.643264 
 127.191111 35.741111 431.941928 
 127.191222 35.741111 430.378727 
 127.190222 35.741111 449.298289 
 127.190333 35.741111 446.667401 
 127.190444 35.741111 444.164761 
 127.190556 35.741111 441.795193 
 127.190778 35.741111 437.451317 
 127.191000 35.741111 433.643264 
 127.191111 35.741111 431.941928 
 127.191222 35.741111 430.378727 
 127.191333 35.741111 428.952204 
 127.190222 35.741222 449.778640 
 127.190333 35.741222 447.075724 
 127.190444 35.741222 444.500933 
 127.190556 35.741222 442.059205 
 127.190778 35.741222 437.570747 
 127.191000 35.741222 433.617829 
 127.191111 35.741222 431.843922 
 127.191222 35.741222 430.208132 
 127.191333 35.741222 428.708886 
 127.190222 35.741333 450.283962 
 127.190333 35.741333 447.509115 
 127.190444 35.741333 444.862273 
 127.190556 35.741333 442.348485 
 127.190778 35.741333 437.715647 
 127.191000 35.741333 433.618068 
 127.191111 35.741333 431.771694 
 127.191222 35.741333 430.063419 
 127.191333 35.741333 428.491554 
 127.190333 35.741333 447.509115 
 127.190444 35.741333 444.862273 
 127.190556 35.741333 442.348485 
 127.190667 35.741333 439.964722 
 127.190889 35.741333 435.598672 
 127.191111 35.741333 431.771694 
 127.191222 35.741333 430.063419 
 127.191333 35.741333 428.491554 
 127.191444 35.741333 427.059565 
 127.190333 35.741445 447.969154 
 127.190444 35.741445 445.250111 
 127.190556 35.741445 442.664113 
 127.190667 35.741445 440.208018 
 127.190889 35.741445 435.697154 
 127.191111 35.741445 431.725078 
 127.191222 35.741445 429.944172 
 127.191333 35.741445 428.299544 
 127.191444 35.741445 426.794771 
 127.190333 35.741556 448.454345 
 127.190444 35.741556 445.663200 
 127.190556 35.741556 443.005092 
 127.190667 35.741556 440.476763 
 127.190889 35.741556 435.821288 
 127.191111 35.741556 431.704318 
 127.191222 35.741556 429.850885 
 127.191333 35.741556 428.133599 
 127.191444 35.741556 426.556148 
 127.190444 35.741556 445.663200 
 127.190556 35.741556 443.005092 
 127.190667 35.741556 440.476763 
 127.190778 35.741556 438.083101 
 127.191000 35.741556 433.695818 
 127.191222 35.741556 429.850885 
 127.191333 35.741556 428.133599 
 127.191444 35.741556 426.556148 
 127.191556 35.741556 425.117070 
 127.190444 35.741667 446.103048 
 127.190556 35.741667 443.372680 
 127.190667 35.741667 440.771970 
 127.190778 35.741667 438.305916 
 127.191000 35.741667 433.773586 
 127.191222 35.741667 429.783323 
 127.191333 35.741667 427.993232 
 127.191444 35.741667 426.342958 
 127.191556 35.741667 424.830922 
 127.190444 35.741778 446.568231 
 127.190556 35.741778 443.765702 
 127.190667 35.741778 441.092709 
 127.190778 35.741778 438.554364 
 127.191000 35.741778 433.877191 
 127.191222 35.741778 429.741802 
 127.191333 35.741778 427.879010 
 127.191444 35.741778 426.156018 
 127.191556 35.741778 424.571130 
 127.190556 35.741778 443.765702 
 127.190667 35.741778 441.092709 
 127.190778 35.741778 438.554364 
 127.190889 35.741778 436.147618 
 127.191111 35.741778 431.740479 
 127.191333 35.741778 427.879010 
 127.191444 35.741778 426.156018 
 127.191556 35.741778 424.571130 
 127.191667 35.741778 423.127850 
 127.190556 35.741889 444.185598 
 127.190667 35.741889 441.440174 
 127.190778 35.741889 438.829387 
 127.190889 35.741889 436.350077 
 127.191111 35.741889 431.797659 
 127.191333 35.741889 427.790627 
 127.191444 35.741889 425.994770 
 127.191556 35.741889 424.336884 
 127.191667 35.741889 422.820586 
 127.190556 35.742000 444.631803 
 127.190667 35.742000 441.813921 
 127.190778 35.742000 439.130669 
 127.190889 35.742000 436.578770 
 127.191111 35.742000 431.881026 
 127.191333 35.742000 427.728386 
 127.191444 35.742000 425.859643 
 127.191556 35.742000 424.128740 
 127.191667 35.742000 422.539405 
 127.190667 35.742000 441.813921 
 127.190778 35.742000 439.130669 
 127.190889 35.742000 436.578770 
 127.191000 35.742000 434.163167 
 127.191222 35.742000 429.736893 
 127.191444 35.742000 425.859643 
 127.191556 35.742000 424.128740 
 127.191667 35.742000 422.539405 
 127.191778 35.742000 421.090173 
 127.190667 35.742111 442.213329 
 127.190778 35.742111 439.457710 
 127.190889 35.742111 436.833323 
 127.191000 35.742111 434.345221 
 127.191222 35.742111 429.773687 
 127.191444 35.742111 425.750890 
 127.191556 35.742111 423.947073 
 127.191667 35.742111 422.284806 
 127.191778 35.742111 420.762506 
 127.190667 35.742222 442.639862 
 127.190778 35.742222 439.811727 
 127.190889 35.742222 437.114701 
 127.191000 35.742222 434.553952 
 127.191222 35.742222 429.836860 
 127.191444 35.742222 425.668221 
 127.191556 35.742222 423.791345 
 127.191667 35.742222 422.055999 
 127.191778 35.742222 420.460487 
 127.190778 35.742222 439.811727 
 127.190889 35.742222 437.114701 
 127.191000 35.742222 434.553952 
 127.191111 35.742222 432.126415 
 127.191333 35.742222 427.682673 
 127.191556 35.742222 423.791345 
 127.191667 35.742222 422.055999 
 127.191778 35.742222 420.460487 
 127.191889 35.742222 419.008347 
 127.190778 35.742333 440.191592 
 127.190889 35.742333 437.422027 
 127.191000 35.742333 434.788730 
 127.191111 35.742333 432.288521 
 127.191333 35.742333 427.699286 
 127.191556 35.742333 423.662177 
 127.191667 35.742333 421.853858 
 127.191778 35.742333 420.185240 
 127.191889 35.742333 418.659971 
 127.190778 35.742444 440.598701 
 127.190889 35.742444 437.756447 
 127.191000 35.742444 435.050452 
 127.191111 35.742444 432.477423 
 127.191333 35.742444 427.742397 
 127.191556 35.742444 423.559213 
 127.191667 35.742444 421.677774 
 127.191778 35.742444 419.935902 
 127.191889 35.742444 418.337361 
 127.190889 35.742444 437.756447 
 127.191000 35.742444 435.050452 
 127.191111 35.742444 432.477423 
 127.191222 35.742444 430.042353 
 127.191444 35.742444 425.582147 
 127.191667 35.742444 421.677774 
 127.191778 35.742444 419.935902 
 127.191889 35.742444 418.337361 
 127.192000 35.742444 416.880688 
 127.190889 35.742555 438.116902 
 127.191000 35.742555 435.338310 
 127.191111 35.742555 432.692560 
 127.191222 35.742555 430.184759 
 127.191444 35.742555 425.578827 
 127.191667 35.742555 421.528439 
 127.191778 35.742555 419.713419 
 127.191889 35.742555 418.041710 
 127.192000 35.742555 416.511734 
 127.190889 35.742667 438.504723 
 127.191000 35.742667 435.653383 
 127.191111 35.742667 432.934762 
 127.191222 35.742667 430.354082 
 127.191444 35.742667 425.602126 
 127.191667 35.742667 421.405428 
 127.191778 35.742667 419.517113 
 127.191889 35.742667 417.772090 
 127.192000 35.742667 416.168665 
 127.191000 35.742667 435.653383 
 127.191111 35.742667 432.934762 
 127.191222 35.742667 430.354082 
 127.191333 35.742667 427.908264 
 127.191556 35.742667 423.433045 
 127.191778 35.742667 419.517113 
 127.191889 35.742667 417.772090 
 127.192000 35.742667 416.168665 
 127.192111 35.742667 414.710403 
 127.191000 35.742778 435.994679 
 127.191111 35.742778 433.203289 
 127.191222 35.742778 430.549829 
 127.191333 35.742778 428.031107 
 127.191556 35.742778 423.409927 
 127.191778 35.742778 419.347746 
 127.191889 35.742778 417.529515 
 127.192000 35.742778 415.852747 
 127.192111 35.742778 414.321120 
 127.191000 35.742889 436.363466 
 127.191111 35.742889 433.499154 
 127.191222 35.742889 430.772764 
 127.191333 35.742889 428.180989 
 127.191556 35.742889 423.413551 
 127.191778 35.742889 419.204825 
 127.191889 35.742889 417.313238 
 127.192000 35.742889 415.562980 
 127.192111 35.742889 413.957843 
 127.191111 35.742889 433.499154 
 127.191222 35.742889 430.772764 
 127.191333 35.742889 428.180989 
 127.191444 35.742889 425.728869 
 127.191667 35.742889 421.239668 
 127.191889 35.742889 417.313238 
 127.192000 35.742889 415.562980 
 127.192111 35.742889 413.957843 
 127.192222 35.742889 412.496371 
 127.191111 35.743000 433.822010 
 127.191222 35.743000 431.022666 
 127.191333 35.743000 428.357812 
 127.191444 35.743000 425.832604 
 127.191667 35.743000 421.196956 
 127.191889 35.743000 417.123790 
 127.192000 35.743000 415.300021 
 127.192111 35.743000 413.621353 
 127.192222 35.743000 412.086214 
 127.191111 35.743111 434.171326 
 127.191222 35.743111 431.299127 
 127.191333 35.743111 428.561295 
 127.191444 35.743111 425.963099 
 127.191667 35.743111 421.181211 
 127.191889 35.743111 416.961515 
 127.192000 35.743111 415.064341 
 127.192111 35.743111 413.312249 
 127.192222 35.743111 411.703548 
 127.191222 35.743111 431.299127 
 127.191333 35.743111 428.561295 
 127.191444 35.743111 425.963099 
 127.191556 35.743111 423.501451 
 127.191778 35.743111 418.999751 
 127.192000 35.743111 415.064341 
 127.192111 35.743111 413.312249 
 127.192222 35.743111 411.703548 
 127.192333 35.743111 410.241831 
 127.191222 35.743222 431.603190 
 127.191333 35.743222 428.792230 
 127.191444 35.743222 426.120896 
 127.191556 35.743222 423.585984 
 127.191778 35.743222 418.937603 
 127.192000 35.743222 414.855218 
 127.192111 35.743222 413.029554 
 127.192222 35.743222 411.347147 
 127.192333 35.743222 409.811699 
 127.191222 35.743333 431.933904 
 127.191333 35.743333 429.049915 
 127.191444 35.743333 426.305544 
 127.191556 35.743333 423.697470 
 127.191778 35.743333 418.902613 
 127.192000 35.743333 414.673463 
 127.192111 35.743333 412.774332 
 127.192222 35.743333 411.018323 
 127.192333 35.743333 409.409253 
 127.191333 35.743333 429.049915 
 127.191444 35.743333 426.305544 
 127.191556 35.743333 423.697470 
 127.191667 35.743333 421.230780 
 127.191889 35.743333 416.717639 
 127.192111 35.743333 412.774332 
 127.192222 35.743333 411.018323 
 127.192333 35.743333 409.409253 
 127.192444 35.743333 407.945675 
 127.191333 35.743444 429.335331 
 127.191444 35.743444 426.517771 
 127.191556 35.743444 423.836385 
 127.191667 35.743444 421.296371 
 127.191889 35.743444 416.636313 
 127.192111 35.743444 412.545794 
 127.192222 35.743444 410.716035 
 127.192333 35.743444 409.033195 
 127.192444 35.743444 407.495710 
 127.191333 35.743555 429.647589 
 127.191444 35.743555 426.756942 
 127.191556 35.743555 424.002345 
 127.191667 35.743555 421.389108 
 127.191889 35.743555 416.582338 
 127.192111 35.743555 412.344816 
 127.192222 35.743555 410.441414 
 127.192333 35.743555 408.684910 
 127.192444 35.743555 407.073624 
 127.191444 35.743555 426.756942 
 127.191556 35.743555 424.002345 
 127.191667 35.743555 421.389108 
 127.191778 35.743555 418.914141 
 127.192000 35.743555 414.391071 
 127.192222 35.743555 410.441414 
 127.192333 35.743555 408.684910 
 127.192444 35.743555 407.073624 
 127.192556 35.743555 405.611164 
 127.191444 35.743667 427.023972 
 127.191556 35.743667 424.196012 
 127.191667 35.743667 421.509403 
 127.191778 35.743667 418.960936 
 127.192000 35.743667 414.290712 
 127.192222 35.743667 410.193603 
 127.192333 35.743667 408.363288 
 127.192444 35.743667 406.678054 
 127.192556 35.743667 405.141624 
 127.191444 35.743778 427.318569 
 127.191556 35.743778 424.417220 
 127.191667 35.743778 421.657214 
 127.191778 35.743778 419.035223 
 127.192000 35.743778 414.217797 
 127.192222 35.743778 409.973193 
 127.192333 35.743778 408.069045 
 127.192444 35.743778 406.309841 
 127.192556 35.743778 404.699420 
 127.191556 35.743778 424.417220 
 127.191667 35.743778 421.657214 
 127.191778 35.743778 419.035223 
 127.191889 35.743778 416.556371 
 127.192111 35.743778 412.024201 
 127.192333 35.743778 408.069045 
 127.192444 35.743778 406.309841 
 127.192556 35.743778 404.699420 
 127.192667 35.743778 403.236348 
 127.191556 35.743889 424.665612 
 127.191667 35.743889 421.832308 
 127.191778 35.743889 419.136895 
 127.191889 35.743889 416.584610 
 127.192111 35.743889 411.905300 
 127.192333 35.743889 407.802706 
 127.192444 35.743889 405.969640 
 127.192556 35.743889 404.285334 
 127.192667 35.743889 402.748238 
 127.191556 35.744000 424.942137 
 127.191667 35.744000 422.035385 
 127.191778 35.744000 419.266398 
 127.191889 35.744000 416.640528 
 127.192111 35.744000 411.813778 
 127.192333 35.744000 407.563448 
 127.192444 35.744000 405.656370 
 127.192556 35.744000 403.898032 
 127.192667 35.744000 402.286765 
 127.191667 35.744000 422.035385 
 127.191778 35.744000 419.266398 
 127.191889 35.744000 416.640528 
 127.192000 35.744000 414.154678 
 127.192222 35.744000 409.615201 
 127.192444 35.744000 405.656370 
 127.192556 35.744000 403.898032 
 127.192667 35.744000 402.286765 
 127.192778 35.744000 400.826194 
 127.191667 35.744111 422.265839 
 127.191778 35.744111 419.423380 
 127.191889 35.744111 416.724027 
 127.192000 35.744111 414.164567 
 127.192222 35.744111 409.477710 
 127.192444 35.744111 405.371202 
 127.192556 35.744111 403.538937 
 127.192667 35.744111 401.853606 
 127.192778 35.744111 400.318948 
 127.191667 35.744222 422.524561 
 127.191778 35.744222 419.608478 
 127.191889 35.744222 416.835490 
 127.192000 35.744222 414.202268 
 127.192222 35.744222 409.367732 
 127.192444 35.744222 405.113245 
 127.192556 35.744222 403.206906 
 127.192667 35.744222 401.447362 
 127.192778 35.744222 399.838468 
 127.191778 35.744222 419.608478 
 127.191889 35.744222 416.835490 
 127.192000 35.744222 414.202268 
 127.192111 35.744222 411.713969 
 127.192333 35.744222 407.168286 
 127.192556 35.744222 403.206906 
 127.192667 35.744222 401.447362 
 127.192778 35.744222 399.838468 
 127.192889 35.744222 398.378807 
 127.191778 35.744333 419.821149 
 127.191889 35.744333 416.974628 
 127.192000 35.744333 414.267747 
 127.192111 35.744333 411.705775 
 127.192333 35.744333 407.012473 
 127.192556 35.744333 402.903172 
 127.192667 35.744333 401.069522 
 127.192778 35.744333 399.386500 
 127.192889 35.744333 397.852569 
 127.191778 35.744444 420.062223 
 127.191889 35.744444 417.142017 
 127.192000 35.744444 414.361323 
 127.192111 35.744444 411.725529 
 127.192333 35.744444 406.884305 
 127.192556 35.744444 402.626784 
 127.192667 35.744444 400.718879 
 127.192778 35.744444 398.961579 
 127.192889 35.744444 397.353232 
 127.191889 35.744444 417.142017 
 127.192000 35.744444 414.361323 
 127.192111 35.744444 411.725529 
 127.192222 35.744444 409.231536 
 127.192444 35.744444 404.681213 
 127.192667 35.744444 400.718879 
 127.192778 35.744444 398.961579 
 127.192889 35.744444 397.353232 
 127.193000 35.744444 395.897471 
 127.191889 35.744556 417.337536 
 127.192000 35.744556 414.483006 
 127.192111 35.744556 411.773362 
 127.192222 35.744556 409.205393 
 127.192444 35.744556 404.506954 
 127.192667 35.744556 400.396200 
 127.192778 35.744556 398.564601 
 127.192889 35.744556 396.881816 
 127.193000 35.744556 395.351593 
 127.191889 35.744667 417.560875 
 127.192000 35.744667 414.632609 
 127.192111 35.744667 411.849218 
 127.192222 35.744667 409.207374 
 127.192444 35.744667 404.361026 
 127.192667 35.744667 400.102062 
 127.192778 35.744667 398.196271 
 127.192889 35.744667 396.439155 
 127.193000 35.744667 394.834576 
 127.192000 35.744778 414.810744 
 127.192111 35.744778 411.953454 
 127.192222 35.744778 409.237583 
 127.192333 35.744778 406.668431 
 127.192556 35.744778 401.966227 
 127.192778 35.744778 397.855415 
 127.192889 35.744778 396.023817 
 127.193000 35.744778 394.344735 
 127.193111 35.744778 392.816653 
 127.192000 35.744889 415.016896 
 127.192111 35.744889 412.085808 
 127.192222 35.744889 409.296012 
 127.192333 35.744889 406.652922 
 127.192556 35.744889 401.802566 
 127.192778 35.744889 397.543298 
 127.192889 35.744889 395.637326 
 127.193000 35.744889 393.883846 
 127.193111 35.744889 392.281226 
 127.192000 35.745000 415.251873 
 127.192111 35.745000 412.246834 
 127.192222 35.745000 409.382959 
 127.192333 35.745000 406.665779 
 127.192556 35.745000 401.666967 
 127.192778 35.745000 397.258942 
 127.192889 35.745000 395.278445 
 127.193000 35.745000 393.450418 
 127.193111 35.745000 391.773111 
 127.192111 35.745000 412.246834 
 127.192222 35.745000 409.382959 
 127.192333 35.745000 406.665779 
 127.192444 35.745000 404.092083 
 127.192667 35.745000 399.387701 
 127.192889 35.745000 395.278445 
 127.193000 35.745000 393.450418 
 127.193111 35.745000 391.773111 
 127.193222 35.745000 390.250276 
 127.192111 35.745111 412.436075 
 127.192222 35.745111 409.498224 
 127.192333 35.745111 406.707055 
 127.192444 35.745111 404.059241 
 127.192667 35.745111 399.206463 
 127.192889 35.745111 394.948503 
 127.193000 35.745111 393.046036 
 127.193111 35.745111 391.294147 
 127.193222 35.745111 389.696706 
 127.192111 35.745222 412.654282 
 127.192222 35.745222 409.642301 
 127.192333 35.745222 406.776990 
 127.192444 35.745222 404.054906 
 127.192667 35.745222 399.053426 
 127.192889 35.745222 394.646461 
 127.193000 35.745222 392.669402 
 127.193111 35.745222 390.842782 
 127.193222 35.745222 389.170586 
 127.192222 35.745222 409.642301 
 127.192333 35.745222 406.776990 
 127.192444 35.745222 404.054906 
 127.192556 35.745222 401.481373 
 127.192778 35.745222 396.775948 
 127.193000 35.745222 392.669402 
 127.193111 35.745222 390.842782 
 127.193222 35.745222 389.170586 
 127.193333 35.745222 387.651323 
 127.192222 35.745333 409.814792 
 127.192333 35.745333 406.875442 
 127.192444 35.745333 404.079190 
 127.192556 35.745333 401.431475 
 127.192778 35.745333 396.577405 
 127.193000 35.745333 392.321907 
 127.193111 35.745333 390.420662 
 127.193222 35.745333 388.673818 
 127.193333 35.745333 387.079764 
 127.192222 35.745444 410.016392 
 127.192333 35.745444 407.002848 
 127.192444 35.745444 404.132274 
 127.192556 35.745444 401.410224 
 127.192778 35.745444 396.407205 
 127.193000 35.745444 392.002451 
 127.193111 35.745444 390.026431 
 127.193222 35.745444 388.204787 
 127.193333 35.745444 386.535792 
 127.192333 35.745444 407.002848 
 127.192444 35.745444 404.132274 
 127.192556 35.745444 401.410224 
 127.192667 35.745444 398.833496 
 127.192889 35.745444 394.128634 
 127.193111 35.745444 390.026431 
 127.193222 35.745444 388.204787 
 127.193333 35.745444 386.535792 
 127.193444 35.745444 385.023198 
 127.192333 35.745556 407.159163 
 127.192444 35.745556 404.214240 
 127.192556 35.745556 401.417830 
 127.192667 35.745556 398.766610 
 127.192889 35.745556 393.912599 
 127.193111 35.745556 389.660935 
 127.193222 35.745556 387.764470 
 127.193333 35.745556 386.020512 
 127.193444 35.745556 384.432930 
 127.192333 35.745667 407.344143 
 127.192444 35.745667 404.324973 
 127.192556 35.745667 401.454303 
 127.192667 35.745667 398.728695 
 127.192889 35.745667 393.725741 
 127.193111 35.745667 389.324828 
 127.193222 35.745667 387.353647 
 127.193333 35.745667 385.534832 
 127.193444 35.745667 383.872367 
 127.192444 35.745667 404.324973 
 127.192556 35.745667 401.454303 
 127.192667 35.745667 398.728695 
 127.192778 35.745667 396.153492 
 127.193000 35.745667 391.450341 
 127.193222 35.745667 387.353647 
 127.193333 35.745667 385.534832 
 127.193444 35.745667 383.872367 
 127.193556 35.745667 382.364792 
 127.192444 35.745778 404.464953 
 127.192556 35.745778 401.519870 
 127.192667 35.745778 398.719719 
 127.192778 35.745778 396.069959 
 127.193000 35.745778 391.217407 
 127.193222 35.745778 386.970999 
 127.193333 35.745778 385.077176 
 127.193444 35.745778 383.339679 
 127.193556 35.745778 381.756926 
 127.192444 35.745889 404.633799 
 127.192556 35.745889 401.614405 
 127.192667 35.745889 398.739812 
 127.192778 35.745889 396.015596 
 127.193000 35.745889 391.013852 
 127.193222 35.745889 386.617940 
 127.193333 35.745889 384.649215 
 127.193444 35.745889 382.836792 
 127.193556 35.745889 381.178970 
 127.192556 35.745889 401.614405 
 127.192667 35.745889 398.739812 
 127.192778 35.745889 396.015596 
 127.192889 35.745889 393.438567 
 127.193111 35.745889 388.738751 
 127.193333 35.745889 384.649215 
 127.193444 35.745889 382.836792 
 127.193556 35.745889 381.178970 
 127.193667 35.745889 379.679496 
 127.192556 35.746000 401.738332 
 127.192667 35.746000 398.789143 
 127.192778 35.746000 395.990319 
 127.192889 35.746000 393.338547 
 127.193111 35.746000 388.489078 
 127.193333 35.746000 384.249574 
 127.193444 35.746000 382.362072 
 127.193556 35.746000 380.629029 
 127.193667 35.746000 379.054307 
 127.192556 35.746111 401.891327 
 127.192667 35.746111 398.867644 
 127.192778 35.746111 395.994312 
 127.192889 35.746111 393.267901 
 127.193111 35.746111 388.268987 
 127.193333 35.746111 383.879723 
 127.193444 35.746111 381.917249 
 127.193556 35.746111 380.109091 
 127.193667 35.746111 378.459228 
 127.192667 35.746111 398.867644 
 127.192778 35.746111 395.994312 
 127.192889 35.746111 393.267901 
 127.193000 35.746111 390.693773 
 127.193222 35.746111 385.998451 
 127.193444 35.746111 381.917249 
 127.193556 35.746111 380.109091 
 127.193667 35.746111 378.459228 
 127.193778 35.746111 376.966230 
 127.192667 35.746222 398.975685 
 127.192778 35.746222 396.027691 
 127.192889 35.746222 393.226486 
 127.193000 35.746222 390.577548 
 127.193222 35.746222 385.732318 
 127.193444 35.746222 381.500890 
 127.193556 35.746222 379.617465 
 127.193667 35.746222 377.892309 
 127.193778 35.746222 376.323872 
 127.192667 35.746333 399.113258 
 127.192778 35.746333 396.090574 
 127.192889 35.746333 393.214549 
 127.193000 35.746333 390.490776 
 127.193222 35.746333 385.495587 
 127.193444 35.746333 381.113884 
 127.193556 35.746333 379.155168 
 127.193667 35.746333 377.354697 
 127.193778 35.746333 375.710799 
 127.192778 35.746333 396.090574 
 127.192889 35.746333 393.214549 
 127.193000 35.746333 390.490776 
 127.193111 35.746333 387.916075 
 127.193333 35.746333 383.226630 
 127.193556 35.746333 379.155168 
 127.193667 35.746333 377.354697 
 127.193778 35.746333 375.710799 
 127.193889 35.746333 374.227214 
 127.192778 35.746444 396.182879 
 127.192889 35.746444 393.232136 
 127.193000 35.746444 390.433629 
 127.193111 35.746444 387.784061 
 127.193333 35.746444 382.944709 
 127.193556 35.746444 378.723019 
 127.193667 35.746444 376.847338 
 127.193778 35.746444 375.128086 
 127.193889 35.746444 373.569119 
 127.192778 35.746556 396.305026 
 127.192889 35.746556 393.279408 
 127.193000 35.746556 390.406012 
 127.193111 35.746556 387.681423 
 127.193333 35.746556 382.691855 
 127.193556 35.746556 378.319629 
 127.193667 35.746556 376.368586 
 127.193778 35.746556 374.573827 
 127.193889 35.746556 372.939324 
 127.192889 35.746556 393.279408 
 127.193000 35.746556 390.406012 
 127.193111 35.746556 387.681423 
 127.193222 35.746556 385.111011 
 127.193444 35.746556 380.428867 
 127.193667 35.746556 376.368586 
 127.193778 35.746556 374.573827 
 127.193889 35.746556 372.939324 
 127.194000 35.746556 371.463683 
 127.192889 35.746667 393.356305 
 127.193000 35.746667 390.408123 
 127.193111 35.746667 387.608614 
 127.193222 35.746667 384.963265 
 127.193444 35.746667 380.130955 
 127.193667 35.746667 375.920184 
 127.193778 35.746667 374.050024 
 127.193889 35.746667 372.340094 
 127.194000 35.746667 370.788877 
 127.192889 35.746778 393.463195 
 127.193000 35.746778 390.440069 
 127.193111 35.746778 387.565485 
 127.193222 35.746778 384.845044 
 127.193444 35.746778 379.862258 
 127.193667 35.746778 375.500688 
 127.193778 35.746778 373.554975 
 127.193889 35.746778 371.769464 
 127.194000 35.746778 370.142519 
 127.193000 35.746778 390.440069 
 127.193111 35.746778 387.565485 
 127.193222 35.746778 384.845044 
 127.193333 35.746778 382.275587 
 127.193556 35.746778 377.602400 
 127.193778 35.746778 373.554975 
 127.193889 35.746778 371.769464 
 127.194000 35.746778 370.142519 
 127.194111 35.746778 368.677864 
 127.193000 35.746889 390.501844 
 127.193111 35.746889 387.552285 
 127.193222 35.746889 384.756855 
 127.193333 35.746889 382.112273 
 127.193556 35.746889 377.288659 
 127.193778 35.746889 373.090480 
 127.193889 35.746889 371.229493 
 127.194000 35.746889 369.526928 
 127.194111 35.746889 367.986622 
 127.193000 35.747000 390.593762 
 127.193111 35.747000 387.569074 
 127.193222 35.747000 384.698497 
 127.193333 35.747000 381.978635 
 127.193556 35.747000 377.004282 
 127.193778 35.747000 372.655040 
 127.193889 35.747000 370.718425 
 127.194000 35.747000 368.940084 
 127.194111 35.747000 367.323975 
 127.193111 35.747000 387.569074 
 127.193222 35.747000 384.698497 
 127.193333 35.747000 381.978635 
 127.193444 35.747000 379.414863 
 127.193667 35.747000 374.751805 
 127.193889 35.747000 370.718425 
 127.194000 35.747000 368.940084 
 127.194111 35.747000 367.323975 
 127.194222 35.747000 365.868741 
 127.193111 35.747111 387.615894 
 127.193222 35.747111 384.670274 
 127.193333 35.747111 381.875233 
 127.193444 35.747111 379.236264 
 127.193667 35.747111 374.422515 
 127.193889 35.747111 370.238114 
 127.194000 35.747111 368.384105 
 127.194111 35.747111 366.692298 
 127.194222 35.747111 365.161218 
 127.193111 35.747222 387.693012 
 127.193222 35.747222 384.672190 
 127.193333 35.747222 381.801814 
 127.193444 35.747222 379.087492 
 127.193667 35.747222 374.122741 
 127.193889 35.747222 369.787009 
 127.194000 35.747222 367.857177 
 127.194111 35.747222 366.089519 
 127.194222 35.747222 364.482439 
 127.193222 35.747222 384.672190 
 127.193333 35.747222 381.801814 
 127.193444 35.747222 379.087492 
 127.193556 35.747222 376.526087 
 127.193778 35.747222 371.874825 
 127.194000 35.747222 367.857177 
 127.194111 35.747222 366.089519 
 127.194222 35.747222 364.482439 
 127.194333 35.747222 363.039640 
 127.193222 35.747333 384.704425 
 127.193333 35.747333 381.758686 
 127.193444 35.747333 378.968984 
 127.193556 35.747333 376.332061 
 127.193778 35.747333 371.529583 
 127.194000 35.747333 367.360383 
 127.194111 35.747333 365.516850 
 127.194222 35.747333 363.833746 
 127.194333 35.747333 362.314891 
 127.193222 35.747444 384.766948 
 127.193333 35.747444 381.745947 
 127.193444 35.747444 378.880967 
 127.193556 35.747444 376.168630 
 127.193778 35.747444 371.215142 
 127.194000 35.747444 366.894601 
 127.194111 35.747444 364.975298 
 127.194222 35.747444 363.216277 
 127.194333 35.747444 361.621475 
 127.193333 35.747444 381.745947 
 127.193444 35.747444 378.880967 
 127.193556 35.747444 376.168630 
 127.193667 35.747444 373.614312 
 127.193889 35.747444 368.976024 
 127.194111 35.747444 364.975298 
 127.194222 35.747444 363.216277 
 127.194333 35.747444 361.621475 
 127.194444 35.747444 360.189580 
 127.193333 35.747556 381.763659 
 127.193444 35.747556 378.823243 
 127.193556 35.747556 376.035334 
 127.193667 35.747556 373.405424 
 127.193889 35.747556 368.615651 
 127.194111 35.747556 364.463102 
 127.194222 35.747556 362.628008 
 127.194333 35.747556 360.957103 
 127.194444 35.747556 359.448955 
 127.193333 35.747667 381.811863 
 127.193444 35.747667 378.796114 
 127.193556 35.747667 375.932735 
 127.193667 35.747667 373.227336 
 127.193889 35.747667 368.286284 
 127.194111 35.747667 363.982121 
 127.194222 35.747667 362.071061 
 127.194333 35.747667 360.324160 
 127.194444 35.747667 358.739865 
 127.193444 35.747667 378.796114 
 127.193556 35.747667 375.932735 
 127.193667 35.747667 373.227336 
 127.193778 35.747667 370.676807 
 127.194000 35.747667 366.053169 
 127.194222 35.747667 362.071061 
 127.194333 35.747667 360.324160 
 127.194444 35.747667 358.739865 
 127.194556 35.747667 357.321854 
 127.193444 35.747778 378.799590 
 127.193556 35.747778 375.860583 
 127.193667 35.747778 373.079538 
 127.193778 35.747778 370.453223 
 127.194000 35.747778 365.677828 
 127.194222 35.747778 361.543621 
 127.194333 35.747778 359.720568 
 127.194444 35.747778 358.059971 
 127.194556 35.747778 356.565625 
 127.193444 35.747889 378.833764 
 127.193556 35.747889 375.819231 
 127.193667 35.747889 372.962642 
 127.193778 35.747889 370.260644 
 127.194000 35.747889 365.333699 
 127.194222 35.747889 361.047603 
 127.194333 35.747889 359.148504 
 127.194444 35.747889 357.411711 
 127.194556 35.747889 355.841138 
 127.193556 35.747889 375.819231 
 127.193667 35.747889 372.962642 
 127.193778 35.747889 370.260644 
 127.193889 35.747889 367.718610 
 127.194111 35.747889 363.110803 
 127.194333 35.747889 359.148504 
 127.194444 35.747889 357.411711 
 127.194556 35.747889 355.841138 
 127.194667 35.747889 354.435520 
 127.193556 35.748000 375.808642 
 127.193667 35.748000 372.876350 
 127.193778 35.748000 370.098511 
 127.193889 35.748000 367.480615 
 127.194111 35.748000 362.720776 
 127.194333 35.748000 358.606100 
 127.194444 35.748000 356.792956 
 127.194556 35.748000 355.145999 
 127.194667 35.748000 353.663844 
 127.193556 35.748111 375.829018 
 127.193667 35.748111 372.820994 
 127.193778 35.748111 369.967287 
 127.193889 35.748111 367.273501 
 127.194111 35.748111 362.361575 
 127.194333 35.748111 358.094471 
 127.194444 35.748111 356.204949 
 127.194556 35.748111 354.481583 
 127.194667 35.748111 352.922867 
 127.193667 35.748111 372.820994 
 127.193778 35.748111 369.967287 
 127.193889 35.748111 367.273501 
 127.194000 35.748111 364.736554 
 127.194222 35.748111 360.146000 
 127.194444 35.748111 356.204949 
 127.194556 35.748111 354.481583 
 127.194667 35.748111 352.922867 
 127.194778 35.748111 351.532449 
 127.193667 35.748222 372.796696 
 127.193778 35.748222 369.867221 
 127.193889 35.748222 367.097647 
 127.194000 35.748222 364.484773 
 127.194222 35.748222 359.742171 
 127.194444 35.748222 355.648725 
 127.194556 35.748222 353.849057 
 127.194667 35.748222 352.213886 
 127.194778 35.748222 350.746979 
 127.193667 35.748333 372.803478 
 127.193778 35.748333 369.798076 
 127.193889 35.748333 366.952555 
 127.194000 35.748333 364.263594 
 127.194222 35.748333 359.368627 
 127.194444 35.748333 355.122471 
 127.194556 35.748333 353.246344 
 127.194667 35.748333 351.534562 
 127.194778 35.748333 349.991009 
 127.193778 35.748333 369.798076 
 127.193889 35.748333 366.952555 
 127.194000 35.748333 364.263594 
 127.194111 35.748333 361.736553 
 127.194333 35.748333 357.164694 
 127.194556 35.748333 353.246344 
 127.194667 35.748333 351.534562 
 127.194778 35.748333 349.991009 
 127.194889 35.748333 348.614474 
 127.193778 35.748444 369.760193 
 127.193889 35.748444 366.838828 
 127.194000 35.748444 364.073882 
 127.194111 35.748444 361.470834 
 127.194333 35.748444 356.746647 
 127.194556 35.748444 352.675619 
 127.194667 35.748444 350.887332 
 127.194778 35.748444 349.267240 
 127.194889 35.748444 347.814012 
 127.193778 35.748556 369.753550 
 127.193889 35.748556 366.756181 
 127.194000 35.748556 363.915090 
 127.194111 35.748556 361.235876 
 127.194333 35.748556 356.359044 
 127.194556 35.748556 352.135021 
 127.194667 35.748556 350.270071 
 127.194778 35.748556 348.573284 
 127.194889 35.748556 347.043204 
 127.193889 35.748556 366.756181 
 127.194000 35.748556 363.915090 
 127.194111 35.748556 361.235876 
 127.194222 35.748556 358.715489 
 127.194444 35.748556 354.164014 
 127.194667 35.748556 350.270071 
 127.194778 35.748556 348.573284 
 127.194889 35.748556 347.043204 
 127.195000 35.748556 345.683445 
 127.193889 35.748667 366.705002 
 127.194000 35.748667 363.787869 
 127.194111 35.748667 361.032590 
 127.194222 35.748667 358.435997 
 127.194444 35.748667 353.731911 
 127.194667 35.748667 349.685003 
 127.194778 35.748667 347.911626 
 127.194889 35.748667 346.304803 
 127.195000 35.748667 344.868263 
 127.193889 35.748778 366.685223 
 127.194000 35.748778 363.691887 
 127.194111 35.748778 360.860384 
 127.194222 35.748778 358.187425 
 127.194444 35.748778 353.330410 
 127.194667 35.748778 349.130220 
 127.194778 35.748778 347.280095 
 127.194889 35.748778 345.596369 
 127.195000 35.748778 344.082892 
 127.194000 35.748778 363.691887 
 127.194111 35.748778 360.860384 
 127.194222 35.748778 358.187425 
 127.194333 35.748778 355.678356 
 127.194556 35.748778 351.148444 
 127.194778 35.748778 347.280095 
 127.194889 35.748778 345.596369 
 127.195000 35.748778 344.082892 
 127.195111 35.748778 342.738508 
 127.194000 35.748889 363.627497 
 127.194111 35.748889 360.719741 
 127.194222 35.748889 357.970386 
 127.194333 35.748889 355.384897 
 127.194556 35.748889 350.701825 
 127.194778 35.748889 346.679959 
 127.194889 35.748889 344.919305 
 127.195000 35.748889 343.328864 
 127.195111 35.748889 341.907359 
 127.194000 35.749000 363.594836 
 127.194111 35.749000 360.610927 
 127.194222 35.749000 357.785278 
 127.194333 35.749000 355.123471 
 127.194556 35.749000 350.287448 
 127.194778 35.749000 346.112272 
 127.194889 35.749000 344.274796 
 127.195000 35.749000 342.607498 
 127.195111 35.749000 341.108979 
 127.194111 35.749000 360.610927 
 127.194222 35.749000 357.785278 
 127.194333 35.749000 355.123471 
 127.194444 35.749000 352.622497 
 127.194667 35.749000 348.115842 
 127.194889 35.749000 344.274796 
 127.195000 35.749000 342.607498 
 127.195111 35.749000 341.108979 
 127.195222 35.749000 339.781838 
 127.194111 35.749111 360.533675 
 127.194222 35.749111 357.631571 
 127.194333 35.749111 354.893287 
 127.194444 35.749111 352.315689 
 127.194667 35.749111 347.655585 
 127.194889 35.749111 343.660728 
 127.195000 35.749111 341.916414 
 127.195111 35.749111 340.340723 
 127.195222 35.749111 338.936310 
 127.194111 35.749222 360.488358 
 127.194222 35.749222 357.509900 
 127.194333 35.749222 354.695239 
 127.194444 35.749222 352.041122 
 127.194667 35.749222 347.227775 
 127.194889 35.749222 343.079316 
 127.195000 35.749222 341.258092 
 127.195111 35.749222 339.605334 
 127.195222 35.749222 338.123757 
 127.194222 35.749333 357.419954 
 127.194333 35.749333 354.528755 
 127.194444 35.749333 351.797956 
 127.194556 35.749333 349.233001 
 127.194778 35.749333 344.597037 
 127.195000 35.749333 340.630370 
 127.195111 35.749333 338.900385 
 127.195222 35.749333 337.341485 
 127.195333 35.749333 335.955914 
 127.194222 35.749444 357.362149 
 127.194333 35.749444 354.394514 
 127.194444 35.749444 351.587134 
 127.194556 35.749444 348.945574 
 127.194778 35.749444 344.156075 
 127.195000 35.749444 340.035510 
 127.195111 35.749444 338.228405 
 127.195222 35.749444 336.592287 
 127.195333 35.749444 335.129461 
 127.194222 35.749556 357.336394 
 127.194333 35.749556 354.292160 
 127.194444 35.749556 351.408038 
 127.194556 35.749556 348.689711 
 127.194778 35.749556 343.746355 
 127.195000 35.749556 339.471569 
 127.195111 35.749556 337.587183 
 127.195222 35.749556 335.873688 
 127.195333 35.749556 334.333447 
 127.194333 35.749556 354.292160 
 127.194444 35.749556 351.408038 
 127.194556 35.749556 348.689711 
 127.194667 35.749556 346.134088 
 127.194889 35.749556 341.523956 
 127.195111 35.749556 337.587183 
 127.195222 35.749556 335.873688 
 127.195333 35.749556 334.333447 
 127.195444 35.749556 332.965273 
 127.194333 35.749667 354.222155 
 127.194444 35.749667 351.261391 
 127.194556 35.749667 348.466399 
 127.194667 35.749667 345.833964 
 127.194889 35.749667 341.070001 
 127.195111 35.749667 336.979030 
 127.195222 35.749667 335.188263 
 127.195333 35.749667 333.570712 
 127.195444 35.749667 332.125069 
 127.194333 35.749778 354.184365 
 127.194444 35.749778 351.146797 
 127.194556 35.749778 348.274977 
 127.194667 35.749778 345.565567 
 127.194889 35.749778 340.647450 
 127.195111 35.749778 336.401958 
 127.195222 35.749778 334.533757 
 127.195333 35.749778 332.838737 
 127.195444 35.749778 331.315464 
 127.194444 35.749778 351.146797 
 127.194556 35.749778 348.274977 
 127.194667 35.749778 345.565567 
 127.194778 35.749778 343.023992 
 127.195000 35.749778 338.440858 
 127.195222 35.749778 334.533757 
 127.195333 35.749778 332.838737 
 127.195444 35.749778 331.315464 
 127.195556 35.749778 329.967559 
 127.194444 35.749889 351.064645 
 127.194556 35.749889 348.115965 
 127.194667 35.749889 345.329550 
 127.194778 35.749889 342.710943 
 127.195000 35.749889 337.973414 
 127.195222 35.749889 333.911485 
 127.195333 35.749889 332.138967 
 127.195444 35.749889 330.538036 
 127.195556 35.749889 329.112433 
 127.194444 35.750000 351.015100 
 127.194556 35.750000 347.989661 
 127.194667 35.750000 345.126343 
 127.194778 35.750000 342.430805 
 127.195000 35.750000 337.539087 
 127.195222 35.750000 333.322538 
 127.195333 35.750000 331.472627 
 127.195444 35.750000 329.794144 
 127.195556 35.750000 328.290950 
 127.194556 35.750000 347.989661 
 127.194667 35.750000 345.126343 
 127.194778 35.750000 342.430805 
 127.194889 35.750000 339.900001 
 127.195111 35.750000 335.345558 
 127.195333 35.750000 331.472627 
 127.195444 35.750000 329.794144 
 127.195556 35.750000 328.290950 
 127.195667 35.750000 326.961924 
 127.194556 35.750111 347.895741 
 127.194667 35.750111 344.955355 
 127.194778 35.750111 342.182723 
 127.194889 35.750111 339.574677 
 127.195111 35.750111 334.865535 
 127.195333 35.750111 330.837529 
 127.195444 35.750111 329.081333 
 127.195556 35.750111 327.500385 
 127.195667 35.750111 326.093444 
 127.194556 35.750222 347.834635 
 127.194667 35.750222 344.817282 
 127.194778 35.750222 341.967658 
 127.194889 35.750222 339.282470 
 127.195111 35.750222 334.418836 
 127.195333 35.750222 330.235963 
 127.195444 35.750222 328.402158 
 127.195556 35.750222 326.743563 
 127.195667 35.750222 325.258812 
 127.194667 35.750222 344.817282 
 127.194778 35.750222 341.967658 
 127.194889 35.750222 339.282470 
 127.195000 35.750222 336.767113 
 127.195222 35.750222 332.240881 
 127.195444 35.750222 328.402158 
 127.195556 35.750222 326.743563 
 127.195667 35.750222 325.258812 
 127.195778 35.750222 323.951471 
 127.194667 35.750333 344.711759 
 127.194778 35.750333 341.784977 
 127.194889 35.750333 339.022485 
 127.195000 35.750333 336.429794 
 127.195222 35.750333 331.748496 
 127.195444 35.750333 327.754388 
 127.195556 35.750333 326.017983 
 127.195667 35.750333 324.455260 
 127.195778 35.750333 323.069905 
 127.194667 35.750444 344.639257 
 127.194778 35.750444 341.635419 
 127.194889 35.750444 338.795723 
 127.195000 35.750444 336.125800 
 127.195222 35.750444 331.289642 
 127.195444 35.750444 327.140356 
 127.195556 35.750444 325.326246 
 127.195667 35.750444 323.685656 
 127.195778 35.750444 322.222394 
 127.194778 35.750444 341.635419 
 127.194889 35.750444 338.795723 
 127.195000 35.750444 336.125800 
 127.195111 35.750444 333.622653 
 127.195333 35.750444 329.129601 
 127.195556 35.750444 325.326246 
 127.195667 35.750444 323.685656 
 127.195778 35.750444 322.222394 
 127.195889 35.750444 320.935409 
 127.194778 35.750556 341.518578 
 127.194889 35.750556 338.601513 
 127.195000 35.750556 335.854193 
 127.195111 35.750556 333.273498 
 127.195333 35.750556 328.625132 
 127.195556 35.750556 324.666077 
 127.195667 35.750556 322.947457 
 127.195778 35.750556 321.406124 
 127.195889 35.750556 320.040903 
 127.194778 35.750667 341.434849 
 127.194889 35.750667 338.440383 
 127.195000 35.750667 335.615634 
 127.195111 35.750667 332.957360 
 127.195333 35.750667 328.153617 
 127.195556 35.750667 324.038802 
 127.195667 35.750667 322.242123 
 127.195778 35.750667 320.622690 
 127.195889 35.750667 319.179205 
 127.194889 35.750667 338.440383 
 127.195000 35.750667 335.615634 
 127.195111 35.750667 332.957360 
 127.195222 35.750667 330.469037 
 127.195444 35.750667 326.008679 
 127.195667 35.750667 322.242123 
 127.195778 35.750667 320.622690 
 127.195889 35.750667 319.179205 
 127.196000 35.750667 317.915177 
 127.194889 35.750778 338.312635 
 127.195000 35.750778 335.410558 
 127.195111 35.750778 332.674806 
 127.195222 35.750778 330.108912 
 127.195444 35.750778 325.493194 
 127.195667 35.750778 321.570888 
 127.195778 35.750778 319.873461 
 127.195889 35.750778 318.351816 
 127.196000 35.750778 317.009585 
 127.194889 35.750889 338.217939 
 127.195000 35.750889 335.238369 
 127.195111 35.750889 332.424972 
 127.195222 35.750889 329.781343 
 127.195444 35.750889 325.009934 
 127.195667 35.750889 320.931550 
 127.195778 35.750889 319.155963 
 127.195889 35.750889 317.555996 
 127.196000 35.750889 316.135398 
 127.195000 35.750889 335.238369 
 127.195111 35.750889 332.424972 
 127.195222 35.750889 329.781343 
 127.195333 35.750889 327.310554 
 127.195556 35.750889 322.884303 
 127.195778 35.750889 319.155963 
 127.195889 35.750889 317.555996 
 127.196000 35.750889 316.135398 
 127.196111 35.750889 314.893195 
 127.195000 35.751000 335.099767 
 127.195111 35.751000 332.208827 
 127.195222 35.751000 329.487565 
 127.195333 35.751000 326.939109 
 127.195556 35.751000 322.357181 
 127.195778 35.751000 318.472771 
 127.195889 35.751000 316.794585 
 127.196000 35.751000 315.295726 
 127.196111 35.751000 313.975094 
 127.195000 35.751111 334.994388 
 127.195111 35.751111 332.025738 
 127.195222 35.751111 329.226675 
 127.195333 35.751111 326.600388 
 127.195556 35.751111 321.862451 
 127.195778 35.751111 317.821639 
 127.195889 35.751111 316.065070 
 127.196000 35.751111 314.487786 
 127.196111 35.751111 313.088561 
 127.195111 35.751111 332.025738 
 127.195222 35.751111 329.226675 
 127.195333 35.751111 326.600388 
 127.195444 35.751111 324.143960 
 127.195667 35.751111 319.753501 
 127.195889 35.751111 316.065070 
 127.196000 35.751111 314.487786 
 127.196111 35.751111 313.088561 
 127.196222 35.751111 311.870843 
 127.195111 35.751222 331.876443 
 127.195222 35.751222 328.999680 
 127.195333 35.751222 326.295663 
 127.195444 35.751222 323.761350 
 127.195667 35.751222 319.214892 
 127.195889 35.751222 315.370067 
 127.196000 35.751222 313.714462 
 127.196111 35.751222 312.236749 
 127.196222 35.751222 310.940497 
 127.195111 35.751333 331.760541 
 127.195222 35.751333 328.805911 
 127.195333 35.751333 326.023996 
 127.195444 35.751333 323.411630 
 127.195667 35.751333 318.708843 
 127.195889 35.751333 314.707290 
 127.196000 35.751333 312.973198 
 127.196111 35.751333 311.416833 
 127.196222 35.751333 310.041882 
 127.195222 35.751333 328.805911 
 127.195333 35.751333 326.023996 
 127.195444 35.751333 323.411630 
 127.195556 35.751333 320.974116 
 127.195778 35.751333 316.620583 
 127.196000 35.751333 312.973198 
 127.196111 35.751333 311.416833 
 127.196222 35.751333 310.041882 
 127.196333 35.751333 308.847449 
 127.195222 35.751444 328.646143 
 127.195333 35.751444 325.786430 
 127.195444 35.751444 323.096114 
 127.195556 35.751444 320.580615 
 127.195778 35.751444 316.070760 
 127.196000 35.751444 312.266651 
 127.196111 35.751444 310.631737 
 127.196222 35.751444 309.178194 
 127.196333 35.751444 307.904997 
 127.195222 35.751556 328.519937 
 127.195333 35.751556 325.582260 
 127.195444 35.751556 322.813825 
 127.195556 35.751556 320.220174 
 127.195778 35.751556 315.553663 
 127.196000 35.751556 311.592497 
 127.196111 35.751556 309.878868 
 127.196222 35.751556 308.346566 
 127.196333 35.751556 306.994440 
 127.195333 35.751556 325.582260 
 127.195444 35.751556 322.813825 
 127.195556 35.751556 320.220174 
 127.195667 35.751556 317.798449 
 127.195889 35.751556 313.483520 
 127.196111 35.751556 309.878868 
 127.196222 35.751556 308.346566 
 127.196333 35.751556 306.994440 
 127.196444 35.751556 305.825871 
 127.195333 35.751667 325.412033 
 127.195444 35.751667 322.565446 
 127.195556 35.751667 319.893610 
 127.195667 35.751667 317.393542 
 127.195889 35.751667 312.921694 
 127.196111 35.751667 309.159715 
 127.196222 35.751667 307.548622 
 127.196333 35.751667 306.117537 
 127.196444 35.751667 304.869960 
 127.195333 35.751778 325.276068 
 127.195444 35.751778 322.351428 
 127.195556 35.751778 319.601507 
 127.195667 35.751778 317.023198 
 127.195889 35.751778 312.394633 
 127.196111 35.751778 308.475534 
 127.196222 35.751778 306.785755 
 127.196333 35.751778 305.275815 
 127.196444 35.751778 303.949336 
 127.195444 35.751778 322.351428 
 127.195556 35.751778 319.601507 
 127.195667 35.751778 317.023198 
 127.195778 35.751778 314.621755 
 127.196000 35.751778 310.346552 
 127.196222 35.751778 306.785755 
 127.196333 35.751778 305.275815 
 127.196444 35.751778 303.949336 
 127.196556 35.751778 302.805503 
 127.195444 35.751889 322.171145 
 127.195556 35.751889 319.342971 
 127.195667 35.751889 316.686252 
 127.195778 35.751889 314.206363 
 127.196000 35.751889 309.773908 
 127.196222 35.751889 306.055447 
 127.196333 35.751889 304.466485 
 127.196444 35.751889 303.060937 
 127.196556 35.751889 301.837862 
 127.195444 35.752000 322.025330 
 127.195556 35.752000 319.119001 
 127.195667 35.752000 316.383973 
 127.195778 35.752000 313.825740 
 127.196000 35.752000 309.236236 
 127.196222 35.752000 305.360318 
 127.196333 35.752000 303.692437 
 127.196444 35.752000 302.207924 
 127.196556 35.752000 300.905712 
 127.195556 35.752000 319.119001 
 127.195667 35.752000 316.383973 
 127.195778 35.752000 313.825740 
 127.195889 35.752000 311.441507 
 127.196111 35.752000 307.207701 
 127.196333 35.752000 303.692437 
 127.196444 35.752000 302.207924 
 127.196556 35.752000 300.905712 
 127.196667 35.752000 299.789108 
 127.195556 35.752111 318.928940 
 127.195667 35.752111 316.115432 
 127.195778 35.752111 313.478685 
 127.195889 35.752111 311.015779 
 127.196111 35.752111 306.624384 
 127.196333 35.752111 302.951115 
 127.196444 35.752111 301.387470 
 127.196556 35.752111 300.005953 
 127.196667 35.752111 298.809995 
 127.195556 35.752222 318.773550 
 127.195667 35.752222 315.881663 
 127.195778 35.752222 313.166503 
 127.195889 35.752222 310.625024 
 127.196111 35.752222 306.076244 
 127.196333 35.752222 302.245176 
 127.196444 35.752222 300.602503 
 127.196556 35.752222 299.141786 
 127.196667 35.752222 297.866577 
 127.195667 35.752222 315.881663 
 127.195778 35.752222 313.166503 
 127.195889 35.752222 310.625024 
 127.196000 35.752222 308.262430 
 127.196222 35.752222 304.071127 
 127.196444 35.752222 300.602503 
 127.196556 35.752222 299.141786 
 127.196667 35.752222 297.866577 
 127.196778 35.752222 296.776148 
 127.195667 35.752333 315.681974 
 127.195778 35.752333 312.888230 
 127.195889 35.752333 310.268009 
 127.196000 35.752333 307.826635 
 127.196222 35.752333 303.477403 
 127.196444 35.752333 299.850429 
 127.196556 35.752333 298.310343 
 127.196667 35.752333 296.955717 
 127.196778 35.752333 295.785694 
 127.195667 35.752445 315.516910 
 127.195778 35.752445 312.644547 
 127.195889 35.752445 309.945548 
 127.196000 35.752445 307.425359 
 127.196222 35.752445 302.918130 
 127.196444 35.752445 299.132740 
 127.196556 35.752445 297.513252 
 127.196667 35.752445 296.079176 
 127.196778 35.752445 294.829527 
 127.195778 35.752445 312.644547 
 127.195889 35.752445 309.945548 
 127.196000 35.752445 307.425359 
 127.196111 35.752445 305.081251 
 127.196333 35.752445 300.933842 
 127.196556 35.752445 297.513252 
 127.196667 35.752445 296.079176 
 127.196778 35.752445 294.829527 
 127.196889 35.752445 293.767536 
 127.195778 35.752556 312.435894 
 127.195889 35.752556 309.658217 
 127.196000 35.752556 307.059313 
 127.196111 35.752556 304.636329 
 127.196333 35.752556 300.330918 
 127.196556 35.752556 296.751903 
 127.196667 35.752556 295.238480 
 127.196778 35.752556 293.909310 
 127.196889 35.752556 292.767747 
 127.195778 35.752667 312.261666 
 127.195889 35.752667 309.405140 
 127.196000 35.752667 306.727351 
 127.196111 35.752667 304.225319 
 127.196333 35.752667 299.761566 
 127.196556 35.752667 296.023784 
 127.196667 35.752667 294.430845 
 127.196778 35.752667 293.021985 
 127.196889 35.752667 291.800680 
 127.195889 35.752667 309.405140 
 127.196000 35.752667 306.727351 
 127.196111 35.752667 304.225319 
 127.196222 35.752667 301.904193 
 127.196444 35.752667 297.802038 
 127.196667 35.752667 294.430845 
 127.196778 35.752667 293.021985 
 127.196889 35.752667 291.800680 
 127.197000 35.752667 290.766288 
 127.195889 35.752778 309.187299 
 127.196000 35.752778 306.430724 
 127.196111 35.752778 303.849744 
 127.196222 35.752778 301.449631 
 127.196444 35.752778 297.189128 
 127.196667 35.752778 293.659157 
 127.196778 35.752778 292.170710 
 127.196889 35.752778 290.869767 
 127.197000 35.752778 289.755559 
 127.195889 35.752889 309.004057 
 127.196000 35.752889 306.168524 
 127.196111 35.752889 303.508425 
 127.196222 35.752889 301.029154 
 127.196444 35.752889 296.609960 
 127.196667 35.752889 292.920868 
 127.196778 35.752889 291.352664 
 127.196889 35.752889 289.971912 
 127.197000 35.752889 288.777719 
 127.196000 35.752889 306.168524 
 127.196111 35.752889 303.508425 
 127.196222 35.752889 301.029154 
 127.196333 35.752889 298.728051 
 127.196556 35.752889 294.672803 
 127.196778 35.752889 291.352664 
 127.196889 35.752889 289.971912 
 127.197000 35.752889 288.777719 
 127.197111 35.752889 287.773232 
 127.196000 35.753000 305.941764 
 127.196111 35.753000 303.202646 
 127.196222 35.753000 300.644316 
 127.196333 35.753000 298.263990 
 127.196556 35.753000 294.050043 
 127.196778 35.753000 290.570768 
 127.196889 35.753000 289.110312 
 127.197000 35.753000 287.836237 
 127.197111 35.753000 286.751814 
 127.196000 35.753111 305.749778 
 127.196111 35.753111 302.931468 
 127.196222 35.753111 300.293907 
 127.196333 35.753111 297.834186 
 127.196556 35.753111 293.461194 
 127.196778 35.753111 289.822440 
 127.196889 35.753111 288.282109 
 127.197000 35.753111 286.927981 
 127.197111 35.753111 285.763452 
 127.196111 35.753111 302.931468 
 127.196222 35.753111 300.293907 
 127.196333 35.753111 297.834186 
 127.196444 35.753111 295.557391 
 127.196667 35.753111 291.550124 
 127.196889 35.753111 288.282109 
 127.197000 35.753111 286.927981 
 127.197111 35.753111 285.763452 
 127.197222 35.753111 284.787975 
 127.196111 35.753222 302.695560 
 127.196222 35.753222 299.978732 
 127.196333 35.753222 297.439578 
 127.196444 35.753222 295.083310 
 127.196667 35.753222 290.916713 
 127.196889 35.753222 287.488926 
 127.197000 35.753222 286.054712 
 127.197111 35.753222 284.810042 
 127.197222 35.753222 283.754245 
 127.196111 35.753333 302.495350 
 127.196222 35.753333 299.699353 
 127.196333 35.753333 297.080868 
 127.196444 35.753333 294.645226 
 127.196667 35.753333 290.319501 
 127.196889 35.753333 286.732148 
 127.197000 35.753333 285.217950 
 127.197111 35.753333 283.893244 
 127.197222 35.753333 282.757229 
 127.196111 35.753445 302.330262 
 127.196222 35.753445 299.454923 
 127.196333 35.753445 296.756932 
 127.196444 35.753445 294.241743 
 127.196667 35.753445 289.756544 
 127.196889 35.753445 286.009279 
 127.197000 35.753445 284.414925 
 127.197111 35.753445 283.010010 
 127.197222 35.753445 281.793606 
 127.196222 35.753445 299.454923 
 127.196333 35.753445 296.756932 
 127.196444 35.753445 294.241743 
 127.196556 35.753445 291.906647 
 127.196778 35.753445 287.789309 
 127.197000 35.753445 284.414925 
 127.197111 35.753445 283.010010 
 127.197222 35.753445 281.793606 
 127.197333 35.753445 280.768898 
 127.196222 35.753556 299.246396 
 127.196333 35.753556 296.468998 
 127.196444 35.753556 293.874362 
 127.196556 35.753556 291.459651 
 127.196778 35.753556 287.182823 
 127.197000 35.753556 283.648507 
 127.197111 35.753556 282.163486 
 127.197222 35.753556 280.866797 
 127.197333 35.753556 279.761748 
 127.196222 35.753667 299.073166 
 127.196333 35.753667 296.216187 
 127.196444 35.753667 293.541929 
 127.196556 35.753667 291.047429 
 127.196778 35.753667 286.610765 
 127.197000 35.753667 282.916169 
 127.197111 35.753667 281.350869 
 127.197222 35.753667 279.973721 
 127.197333 35.753667 278.788158 
 127.196333 35.753667 296.216187 
 127.196444 35.753667 293.541929 
 127.196556 35.753667 291.047429 
 127.196667 35.753667 288.737834 
 127.196889 35.753667 284.670805 
 127.197111 35.753667 281.350869 
 127.197222 35.753667 279.973721 
 127.197333 35.753667 278.788158 
 127.197444 35.753667 277.793602 
 127.196333 35.753778 295.999482 
 127.196444 35.753778 293.245701 
 127.196556 35.753778 290.671512 
 127.196667 35.753778 288.282184 
 127.196889 35.753778 284.055301 
 127.197111 35.753778 280.575063 
 127.197222 35.753778 279.117559 
 127.197333 35.753778 277.851584 
 127.197444 35.753778 276.776435 
 127.196333 35.753889 295.818251 
 127.196444 35.753889 292.984772 
 127.196556 35.753889 290.330719 
 127.196667 35.753889 287.861483 
 127.196889 35.753889 283.474396 
 127.197111 35.753889 279.833506 
 127.197222 35.753889 278.295472 
 127.197333 35.753889 276.948914 
 127.197444 35.753889 275.792996 
 127.196444 35.753889 292.984772 
 127.196556 35.753889 290.330719 
 127.196667 35.753889 287.861483 
 127.196778 35.753889 285.574432 
 127.197000 35.753889 281.559334 
 127.197222 35.753889 278.295472 
 127.197333 35.753889 276.948914 
 127.197444 35.753889 275.792996 
 127.197556 35.753889 274.830816 
 127.196444 35.754000 292.760152 
 127.196556 35.754000 290.026333 
 127.196667 35.754000 287.477289 
 127.196778 35.754000 285.110259 
 127.197000 35.754000 280.934937 
 127.197222 35.754000 277.510399 
 127.197333 35.754000 276.083358 
 127.197444 35.754000 274.846776 
 127.197556 35.754000 273.803873 
 127.196444 35.754111 292.571183 
 127.196556 35.754111 289.757422 
 127.196667 35.754111 287.128393 
 127.196778 35.754111 284.681209 
 127.197000 35.754111 280.345312 
 127.197222 35.754111 276.759746 
 127.197333 35.754111 275.252049 
 127.197444 35.754111 273.934628 
 127.197556 35.754111 272.810828 
 127.196556 35.754111 289.757422 
 127.196667 35.754111 287.128393 
 127.196778 35.754111 284.681209 
 127.196889 35.754111 282.420948 
 127.197111 35.754111 278.458811 
 127.197333 35.754111 275.252049 
 127.197444 35.754111 273.934628 
 127.197556 35.754111 272.810828 
 127.197667 35.754111 271.880173 
 127.196556 35.754222 289.524654 
 127.196667 35.754222 286.815602 
 127.196778 35.754222 284.288226 
 127.196889 35.754222 281.947725 
 127.197111 35.754222 277.824714 
 127.197333 35.754222 274.456619 
 127.197444 35.754222 273.058322 
 127.197556 35.754222 271.853590 
 127.197667 35.754222 270.841815 
 127.196556 35.754333 289.328451 
 127.196667 35.754333 286.539474 
 127.196778 35.754333 283.932003 
 127.196889 35.754333 281.511364 
 127.197111 35.754333 277.227679 
 127.197333 35.754333 273.698453 
 127.197444 35.754333 272.219383 
 127.197556 35.754333 270.933820 
 127.197667 35.754333 269.841030 
 127.196667 35.754333 286.539474 
 127.196778 35.754333 283.932003 
 127.196889 35.754333 281.511364 
 127.197000 35.754333 279.275004 
 127.197222 35.754333 275.367436 
 127.197444 35.754333 272.219383 
 127.197556 35.754333 270.933820 
 127.197667 35.754333 269.841030 
 127.197778 35.754333 268.944012 
 127.196667 35.754444 286.299173 
 127.196778 35.754444 283.611431 
 127.196889 35.754444 281.110475 
 127.197000 35.754444 278.793626 
 127.197222 35.754444 274.724804 
 127.197444 35.754444 271.415035 
 127.197556 35.754444 270.048466 
 127.197667 35.754444 268.874483 
 127.197778 35.754444 267.896213 
 127.196667 35.754555 286.095639 
 127.196778 35.754555 283.327724 
 127.196889 35.754555 280.746551 
 127.197000 35.754555 278.349312 
 127.197222 35.754555 274.119437 
 127.197444 35.754555 270.648152 
 127.197556 35.754555 269.200679 
 127.197667 35.754555 267.945608 
 127.197778 35.754555 266.886188 
 127.196778 35.754555 283.327724 
 127.196889 35.754555 280.746551 
 127.197000 35.754555 278.349312 
 127.197111 35.754555 276.141010 
 127.197333 35.754555 272.289019 
 127.197556 35.754555 269.200679 
 127.197667 35.754555 267.945608 
 127.197778 35.754555 266.886188 
 127.197889 35.754555 266.022050 
 127.196778 35.754667 283.080020 
 127.196889 35.754667 280.418452 
 127.197000 35.754667 277.940645 
 127.197111 35.754667 275.651727 
 127.197333 35.754667 271.638099 
 127.197556 35.754667 268.387653 
 127.197667 35.754667 267.051316 
 127.197778 35.754667 265.910572 
 127.197889 35.754667 264.964918 
 127.196778 35.754778 282.869286 
 127.196889 35.754778 280.127420 
 127.197000 35.754778 277.569144 
 127.197111 35.754778 275.199710 
 127.197333 35.754778 271.024645 
 127.197556 35.754778 267.612295 
 127.197667 35.754778 266.194794 
 127.197778 35.754778 264.972827 
 127.197889 35.754778 263.945762 
 127.196889 35.754778 280.127420 
 127.197000 35.754778 277.569144 
 127.197111 35.754778 275.199710 
 127.197222 35.754778 273.016651 
 127.197444 35.754778 269.221829 
 127.197667 35.754778 266.194794 
 127.197778 35.754778 264.972827 
 127.197889 35.754778 263.945762 
 127.198000 35.754778 263.116500 
 127.196889 35.754889 279.872568 
 127.197000 35.754889 277.233644 
 127.197111 35.754889 274.783515 
 127.197222 35.754889 272.519585 
 127.197444 35.754889 268.562738 
 127.197667 35.754889 265.373205 
 127.197778 35.754889 264.069837 
 127.197889 35.754889 262.961183 
 127.198000 35.754889 262.050269 
 127.196889 35.755000 279.654544 
 127.197000 35.755000 276.934932 
 127.197111 35.755000 274.404067 
 127.197222 35.755000 272.059226 
 127.197444 35.755000 267.940275 
 127.197667 35.755000 264.588165 
 127.197778 35.755000 263.203358 
 127.197889 35.755000 262.013078 
 127.198000 35.755000 261.020475 
 127.197000 35.755000 276.934932 
 127.197111 35.755000 274.404067 
 127.197222 35.755000 272.059226 
 127.197333 35.755000 269.905335 
 127.197556 35.755000 266.168388 
 127.197778 35.755000 263.203358 
 127.197889 35.755000 262.013078 
 127.198000 35.755000 261.020475 
 127.198111 35.755000 260.225286 
 127.197000 35.755111 276.673539 
 127.197111 35.755111 274.062037 
 127.197222 35.755111 271.636384 
 127.197333 35.755111 269.401631 
 127.197556 35.755111 265.502545 
 127.197778 35.755111 262.374899 
 127.197889 35.755111 261.103093 
 127.198000 35.755111 260.028904 
 127.198111 35.755111 259.151937 
 127.197000 35.755222 276.448683 
 127.197111 35.755222 273.756363 
 127.197222 35.755222 271.249718 
 127.197333 35.755222 268.933922 
 127.197556 35.755222 264.872340 
 127.197778 35.755222 261.581719 
 127.197889 35.755222 260.228209 
 127.198000 35.755222 259.072254 
 127.198111 35.755222 258.113330 
 127.197111 35.755222 273.756363 
 127.197222 35.755222 271.249718 
 127.197333 35.755222 268.933922 
 127.197444 35.755222 266.806598 
 127.197667 35.755222 263.129379 
 127.197889 35.755222 260.228209 
 127.198000 35.755222 259.072254 
 127.198111 35.755222 258.113330 
 127.198222 35.755222 257.354233 
 127.197111 35.755333 273.488211 
 127.197222 35.755333 270.900671 
 127.197333 35.755333 268.503931 
 127.197444 35.755333 266.295485 
 127.197667 35.755333 262.455732 
 127.197889 35.755333 259.391544 
 127.198000 35.755333 258.153925 
 127.198111 35.755333 257.113146 
 127.198222 35.755333 256.272130 
 127.197111 35.755444 273.256772 
 127.197222 35.755444 270.588156 
 127.197333 35.755444 268.110292 
 127.197444 35.755444 265.820543 
 127.197667 35.755444 261.817896 
 127.197889 35.755444 258.590329 
 127.198000 35.755444 257.270868 
 127.198111 35.755444 256.148054 
 127.198222 35.755444 255.224939 
 127.197222 35.755444 270.588156 
 127.197333 35.755444 268.110292 
 127.197444 35.755444 265.820543 
 127.197556 35.755444 263.723753 
 127.197778 35.755444 260.107224 
 127.198000 35.755444 257.270868 
 127.198111 35.755444 256.148054 
 127.198222 35.755444 255.224939 
 127.198333 35.755444 254.501369 
 127.197222 35.755555 270.313364 
 127.197333 35.755555 267.754473 
 127.197444 35.755555 265.383519 
 127.197556 35.755555 263.205472 
 127.197778 35.755555 259.426008 
 127.198000 35.755555 256.426228 
 127.198111 35.755555 255.221482 
 127.198222 35.755555 254.216369 
 127.198333 35.755555 253.410608 
 127.197222 35.755667 270.075462 
 127.197333 35.755667 267.435363 
 127.197444 35.755667 264.983024 
 127.197556 35.755667 262.723538 
 127.197778 35.755667 258.780777 
 127.198000 35.755667 255.617211 
 127.198111 35.755667 254.330352 
 127.198222 35.755667 253.243062 
 127.198333 35.755667 252.354929 
 127.197333 35.755667 267.435363 
 127.197444 35.755667 264.983024 
 127.197556 35.755667 262.723538 
 127.197667 35.755667 260.654621 
 127.197889 35.755667 257.100338 
 127.198111 35.755667 254.330352 
 127.198222 35.755667 253.243062 
 127.198333 35.755667 252.354929 
 127.198444 35.755667 251.668641 
 127.197333 35.755778 267.153723 
 127.197444 35.755778 264.619955 
 127.197556 35.755778 262.278989 
 127.197667 35.755778 260.128410 
 127.197889 35.755778 256.410506 
 127.198111 35.755778 253.476403 
 127.198222 35.755778 252.306897 
 127.198333 35.755778 251.336352 
 127.198444 35.755778 250.567585 
 127.197333 35.755889 266.910055 
 127.197444 35.755889 264.294957 
 127.197556 35.755889 261.872609 
 127.197667 35.755889 259.640466 
 127.197889 35.755889 255.759139 
 127.198111 35.755889 252.661120 
 127.198222 35.755889 251.409498 
 127.198333 35.755889 250.356644 
 127.198444 35.755889 249.505501 
 127.197444 35.755889 264.294957 
 127.197556 35.755889 261.872609 
 127.197667 35.755889 259.640466 
 127.197778 35.755889 257.603286 
 127.198000 35.755889 254.112186 
 127.198222 35.755889 251.409498 
 127.198333 35.755889 250.356644 
 127.198444 35.755889 249.505501 
 127.198556 35.755889 248.856032 
 127.197444 35.756000 264.007025 
 127.197556 35.756000 261.503112 
 127.197667 35.756000 259.189223 
 127.197778 35.756000 257.070242 
 127.198000 35.756000 253.415110 
 127.198222 35.756000 250.547890 
 127.198333 35.756000 249.412545 
 127.198444 35.756000 248.478843 
 127.198556 35.756000 247.746618 
 127.197444 35.756111 263.757265 
 127.197556 35.756111 261.171884 
 127.197667 35.756111 258.776347 
 127.197778 35.756111 256.575663 
 127.198000 35.756111 252.756698 
 127.198222 35.756111 249.725146 
 127.198333 35.756111 248.507410 
 127.198444 35.756111 247.491252 
 127.198556 35.756111 246.676373 
 127.197556 35.756111 261.171884 
 127.197667 35.756111 258.776347 
 127.197778 35.756111 256.575663 
 127.197889 35.756111 254.567642 
 127.198111 35.756111 251.141262 
 127.198333 35.756111 248.507410 
 127.198444 35.756111 247.491252 
 127.198556 35.756111 246.676373 
 127.198667 35.756111 246.065349 
 127.197556 35.756222 260.877901 
 127.197667 35.756222 258.400531 
 127.197778 35.756222 256.117961 
 127.197889 35.756222 254.027869 
 127.198111 35.756222 250.437043 
 127.198333 35.756222 247.638237 
 127.198444 35.756222 246.539440 
 127.198556 35.756222 245.641725 
 127.198667 35.756222 244.947795 
 127.197556 35.756333 260.622287 
 127.197667 35.756333 258.063183 
 127.197778 35.756333 255.698824 
 127.197889 35.756333 253.526760 
 127.198111 35.756333 249.771684 
 127.198333 35.756333 246.808125 
 127.198444 35.756333 245.626791 
 127.198556 35.756333 244.646341 
 127.198667 35.756333 243.869606 
 127.197667 35.756333 258.063183 
 127.197778 35.756333 255.698824 
 127.197889 35.756333 253.526760 
 127.198000 35.756333 251.551656 
 127.198222 35.756333 248.190907 
 127.198444 35.756333 245.626791 
 127.198556 35.756333 244.646341 
 127.198667 35.756333 243.869606 
 127.198778 35.756333 243.296670 
 127.197667 35.756444 257.763257 
 127.197778 35.756444 255.316925 
 127.197889 35.756444 253.062703 
 127.198000 35.756444 251.005385 
 127.198222 35.756444 247.479769 
 127.198444 35.756444 244.750275 
 127.198556 35.756444 243.686906 
 127.198667 35.756444 242.827184 
 127.198778 35.756444 242.171060 
 127.197667 35.756555 257.501900 
 127.197778 35.756555 254.973691 
 127.197889 35.756555 252.637410 
 127.198000 35.756555 250.497975 
 127.198222 35.756555 246.807690 
 127.198444 35.756555 243.913017 
 127.198556 35.756555 242.766831 
 127.198667 35.756555 241.824223 
 127.198778 35.756555 241.085012 
 127.197778 35.756555 254.973691 
 127.197889 35.756555 252.637410 
 127.198000 35.756555 250.497975 
 127.198111 35.756555 248.553296 
 127.198333 35.756555 245.259695 
 127.198556 35.756555 242.766831 
 127.198667 35.756555 241.824223 
 127.198778 35.756555 241.085012 
 127.198889 35.756555 240.551657 
 127.197778 35.756667 254.668057 
 127.197889 35.756667 252.249531 
 127.198000 35.756667 250.027794 
 127.198111 35.756667 248.000626 
 127.198333 35.756667 244.541733 
 127.198556 35.756667 241.883061 
 127.198667 35.756667 240.857383 
 127.198778 35.756667 240.034900 
 127.198889 35.756667 239.418202 
 127.197778 35.756778 254.400763 
 127.197889 35.756778 251.899946 
 127.198000 35.756778 249.595864 
 127.198111 35.756778 247.486163 
 127.198333 35.756778 243.861892 
 127.198556 35.756778 241.037325 
 127.198667 35.756778 239.928534 
 127.198778 35.756778 239.022740 
 127.198889 35.756778 238.322657 
 127.197889 35.756778 251.899946 
 127.198000 35.756778 249.595864 
 127.198111 35.756778 247.486163 
 127.198222 35.756778 245.575414 
 127.198444 35.756778 242.349559 
 127.198667 35.756778 239.928534 
 127.198778 35.756778 239.022740 
 127.198889 35.756778 238.322657 
 127.199000 35.756778 237.828492 
 127.197889 35.756889 251.589275 
 127.198000 35.756889 249.202944 
 127.198111 35.756889 247.010807 
 127.198222 35.756889 245.017562 
 127.198444 35.756889 241.626272 
 127.198667 35.756889 239.039290 
 127.198778 35.756889 238.050283 
 127.198889 35.756889 237.266917 
 127.199000 35.756889 236.689265 
 127.197889 35.757000 251.316563 
 127.198000 35.757000 248.847797 
 127.198111 35.757000 246.573037 
 127.198222 35.757000 244.497111 
 127.198444 35.757000 240.940012 
 127.198667 35.757000 238.186701 
 127.198778 35.757000 237.114296 
 127.198889 35.757000 236.247462 
 127.199000 35.757000 235.586137 
 127.198000 35.757000 248.847797 
 127.198111 35.757000 246.573037 
 127.198222 35.757000 244.497111 
 127.198333 35.757000 242.618031 
 127.198556 35.757000 239.461702 
 127.198778 35.757000 237.114296 
 127.198889 35.757000 236.247462 
 127.199000 35.757000 235.586137 
 127.199111 35.757000 235.132661 
 127.198000 35.757111 248.531759 
 127.198111 35.757111 246.174474 
 127.198222 35.757111 244.015964 
 127.198333 35.757111 242.054108 
 127.198556 35.757111 238.731911 
 127.198778 35.757111 236.218108 
 127.198889 35.757111 235.267906 
 127.199000 35.757111 234.523010 
 127.199111 35.757111 233.985888 
 127.198000 35.757222 248.253858 
 127.198111 35.757222 245.813861 
 127.198222 35.757222 243.572579 
 127.198333 35.757222 241.527762 
 127.198556 35.757222 238.039320 
 127.198778 35.757222 235.358748 
 127.198889 35.757222 234.324991 
 127.199000 35.757222 233.496337 
 127.199111 35.757222 232.875383 
 127.198111 35.757333 245.492553 
 127.198222 35.757333 243.168596 
 127.198333 35.757333 241.040914 
 127.198444 35.757333 239.114107 
 127.198667 35.757333 235.861853 
 127.198889 35.757333 233.422070 
 127.199000 35.757333 232.509759 
 127.199111 35.757333 231.805074 
 127.199222 35.757333 231.308213 
 127.198111 35.757444 245.209561 
 127.198222 35.757444 242.802741 
 127.198333 35.757444 240.592006 
 127.198444 35.757444 238.582084 
 127.198667 35.757444 235.163147 
 127.198889 35.757444 232.556149 
 127.199000 35.757444 231.559992 
 127.199111 35.757444 230.771389 
 127.199222 35.757444 230.190403 
 127.198111 35.757556 244.965587 
 127.198222 35.757556 242.475858 
 127.198333 35.757556 240.182024 
 127.198444 35.757556 238.088942 
 127.198667 35.757556 234.503230 
 127.198889 35.757556 231.728928 
 127.199000 35.757556 230.648882 
 127.199111 35.757556 229.776317 
 127.199222 35.757556 229.111162 
 127.198222 35.757556 242.475858 
 127.198333 35.757556 240.182024 
 127.198444 35.757556 238.088942 
 127.198556 35.757556 236.194597 
 127.198778 35.757556 233.013468 
 127.199000 35.757556 230.648882 
 127.199111 35.757556 229.776317 
 127.199222 35.757556 229.111162 
 127.199333 35.757556 228.655761 
 127.198222 35.757667 242.188525 
 127.198333 35.757667 239.811688 
 127.198444 35.757667 237.635542 
 127.198556 35.757667 235.657940 
 127.198778 35.757667 232.309971 
 127.199000 35.757667 229.778008 
 127.199111 35.757667 228.821581 
 127.199222 35.757667 228.072357 
 127.199333 35.757667 227.532812 
 127.198222 35.757778 241.939870 
 127.198333 35.757778 239.479840 
 127.198444 35.757778 237.220441 
 127.198556 35.757778 235.159393 
 127.198778 35.757778 231.644203 
 127.199000 35.757778 228.944484 
 127.199111 35.757778 227.904006 
 127.199222 35.757778 227.070526 
 127.199333 35.757778 226.446648 
 127.198333 35.757778 239.479840 
 127.198444 35.757778 237.220441 
 127.198556 35.757778 235.159393 
 127.198667 35.757778 233.301193 
 127.198889 35.757778 230.192298 
 127.199111 35.757778 227.904006 
 127.199222 35.757778 227.070526 
 127.199333 35.757778 226.446648 
 127.199444 35.757778 226.032697 
 127.198333 35.757889 239.187737 
 127.198444 35.757889 236.845181 
 127.198556 35.757889 234.700782 
 127.198667 35.757889 232.759169 
 127.198889 35.757889 229.482984 
 127.199111 35.757889 227.026862 
 127.199222 35.757889 226.109225 
 127.199333 35.757889 225.401114 
 127.199444 35.757889 224.902720 
 127.198333 35.758000 238.934490 
 127.198444 35.758000 236.508586 
 127.198556 35.758000 234.280647 
 127.198667 35.758000 232.255429 
 127.198889 35.758000 228.811574 
 127.199111 35.758000 226.187240 
 127.199222 35.758000 225.185256 
 127.199333 35.758000 224.392723 
 127.199444 35.758000 223.809698 
 127.198444 35.758000 236.508586 
 127.198556 35.758000 234.280647 
 127.198667 35.758000 232.255429 
 127.198778 35.758000 230.431027 
 127.199000 35.758000 227.395811 
 127.199222 35.758000 225.185256 
 127.199333 35.758000 224.392723 
 127.199444 35.758000 223.809698 
 127.199556 35.758000 223.438396 
 127.198444 35.758111 236.211929 
 127.198556 35.758111 233.900546 
 127.198667 35.758111 231.791820 
 127.198778 35.758111 229.883714 
 127.199000 35.758111 226.680755 
 127.199222 35.758111 224.301910 
 127.199333 35.758111 223.425055 
 127.199444 35.758111 222.757498 
 127.199556 35.758111 222.301586 
 127.198444 35.758222 235.954307 
 127.198556 35.758222 233.559287 
 127.198667 35.758222 231.366863 
 127.198778 35.758222 229.374861 
 127.199000 35.758222 226.003777 
 127.199222 35.758222 223.456259 
 127.199333 35.758222 222.494891 
 127.199444 35.758222 221.742611 
 127.199556 35.758222 221.201899 
 127.198556 35.758222 233.559287 
 127.198667 35.758222 231.366863 
 127.198778 35.758222 229.374861 
 127.198889 35.758222 227.587675 
 127.199111 35.758222 224.626929 
 127.199333 35.758222 222.494891 
 127.199444 35.758222 221.742611 
 127.199556 35.758222 221.201899 
 127.199667 35.758222 220.873210 
 127.198556 35.758333 233.258160 
 127.198667 35.758333 230.982133 
 127.198778 35.758333 228.906332 
 127.198889 35.758333 227.035280 
 127.199111 35.758333 223.906334 
 127.199333 35.758333 221.605541 
 127.199444 35.758333 220.768639 
 127.199556 35.758333 220.143226 
 127.199667 35.758333 219.729624 
 127.198556 35.758444 232.996245 
 127.198667 35.758444 230.636422 
 127.198778 35.758444 228.476630 
 127.198889 35.758444 226.521521 
 127.199111 35.758444 223.223989 
 127.199333 35.758444 220.754059 
 127.199444 35.758444 219.832342 
 127.199556 35.758444 219.122037 
 127.199667 35.758444 218.623329 
 127.198667 35.758444 230.636422 
 127.198778 35.758444 228.476630 
 127.198889 35.758444 226.521521 
 127.199000 35.758444 224.769300 
 127.199222 35.758444 221.884447 
 127.199444 35.758444 219.832342 
 127.199556 35.758444 219.122037 
 127.199667 35.758444 218.623329 
 127.199778 35.758444 218.338305 
 127.198667 35.758556 230.330545 
 127.198778 35.758556 228.086713 
 127.198889 35.758556 226.047497 
 127.199000 35.758556 224.210971 
 127.199222 35.758556 221.157163 
 127.199444 35.758556 218.935544 
 127.199556 35.758556 218.140301 
 127.199667 35.758556 217.556442 
 127.199778 35.758556 217.186185 
 127.198667 35.758667 230.065040 
 127.198778 35.758667 227.737263 
 127.198889 35.758667 225.614038 
 127.199000 35.758667 223.693302 
 127.199222 35.758667 220.470735 
 127.199444 35.758667 218.079799 
 127.199556 35.758667 217.199716 
 127.199667 35.758667 216.530806 
 127.199778 35.758667 216.075417 
 127.198778 35.758667 227.737263 
 127.198889 35.758667 225.614038 
 127.199000 35.758667 223.693302 
 127.199111 35.758667 221.979338 
 127.199333 35.758667 219.171139 
 127.199556 35.758667 217.199716 
 127.199667 35.758667 216.530806 
 127.199778 35.758667 216.075417 
 127.199889 35.758667 215.834140 
 127.198778 35.758778 227.427196 
 127.198889 35.758778 225.219767 
 127.199000 35.758778 223.214628 
 127.199111 35.758778 221.416192 
 127.199333 35.758778 218.438570 
 127.199556 35.758778 216.297159 
 127.199667 35.758778 215.543005 
 127.199778 35.758778 215.002291 
 127.199889 35.758778 214.675473 
 127.198778 35.758889 227.157693 
 127.198889 35.758889 224.866156 
 127.199000 35.758889 222.776710 
 127.199111 35.758889 220.893899 
 127.199333 35.758889 217.747047 
 127.199556 35.758889 215.435845 
 127.199667 35.758889 214.596545 
 127.199778 35.758889 213.970606 
 127.199889 35.758889 213.558347 
 127.198889 35.758889 224.866156 
 127.199000 35.758889 222.776710 
 127.199111 35.758889 220.893899 
 127.199222 35.758889 219.216042 
 127.199444 35.758889 216.485894 
 127.199667 35.758889 214.596545 
 127.199778 35.758889 213.970606 
 127.199889 35.758889 213.558347 
 127.200000 35.758889 213.361719 
 127.198889 35.759000 224.552104 
 127.199000 35.759000 222.378156 
 127.199111 35.759000 220.410775 
 127.199222 35.759000 218.648145 
 127.199444 35.759000 215.748100 
 127.199667 35.759000 213.688284 
 127.199778 35.759000 212.976926 
 127.199889 35.759000 212.479032 
 127.200000 35.759000 212.196685 
 127.198889 35.759111 224.278807 
 127.199000 35.759111 222.020453 
 127.199111 35.759111 219.968597 
 127.199222 35.759111 218.121291 
 127.199444 35.759111 215.051544 
 127.199667 35.759111 212.821457 
 127.199778 35.759111 212.024778 
 127.199889 35.759111 211.441349 
 127.200000 35.759111 211.073383 
 127.199000 35.759111 222.020453 
 127.199111 35.759111 219.968597 
 127.199222 35.759111 218.121291 
 127.199333 35.759111 216.482704 
 127.199556 35.759111 213.831336 
 127.199778 35.759111 212.024778 
 127.199889 35.759111 211.441349 
 127.200000 35.759111 211.073383 
 127.200111 35.759111 210.921610 
 127.199000 35.759222 221.702486 
 127.199111 35.759222 219.565960 
 127.199222 35.759222 217.633782 
 127.199333 35.759222 215.910251 
 127.199556 35.759222 213.088509 
 127.199778 35.759222 211.110999 
 127.199889 35.759222 210.441839 
 127.200000 35.759222 209.988060 
 127.200111 35.759222 209.750254 
 127.199000 35.759333 221.425022 
 127.199111 35.759333 219.203777 
 127.199222 35.759333 217.186676 
 127.199333 35.759333 215.378152 
 127.199556 35.759333 212.385935 
 127.199778 35.759333 210.237376 
 127.199889 35.759333 209.482437 
 127.200000 35.759333 208.942797 
 127.200111 35.759333 208.618910 
 127.199111 35.759333 219.203777 
 127.199222 35.759333 217.186676 
 127.199333 35.759333 215.378152 
 127.199444 35.759333 213.776642 
 127.199667 35.759333 211.205133 
 127.199889 35.759333 209.482437 
 127.200000 35.759333 208.942797 
 127.200111 35.759333 208.618910 
 127.200222 35.759333 208.512588 
 127.199111 35.759444 218.882681 
 127.199222 35.759444 216.780753 
 127.199333 35.759444 214.887331 
 127.199444 35.759444 213.200718 
 127.199667 35.759444 210.458644 
 127.199889 35.759444 208.564802 
 127.200000 35.759444 207.939400 
 127.200111 35.759444 207.529532 
 127.200222 35.759444 207.337144 
 127.199111 35.759556 218.601685 
 127.199222 35.759556 216.414733 
 127.199333 35.759556 214.436216 
 127.199444 35.759556 212.664303 
 127.199667 35.759556 209.751270 
 127.199889 35.759556 207.685889 
 127.200000 35.759556 206.974528 
 127.200111 35.759556 206.478483 
 127.200222 35.759556 206.199832 
 127.199222 35.759556 216.414733 
 127.199333 35.759556 214.436216 
 127.199444 35.759556 212.664303 
 127.199556 35.759556 211.103044 
 127.199778 35.759556 208.612384 
 127.200000 35.759556 206.974528 
 127.200111 35.759556 206.478483 
 127.200222 35.759556 206.199832 
 127.200333 35.759556 206.139443 
 127.199222 35.759667 216.089990 
 127.199333 35.759667 214.026474 
 127.199444 35.759667 212.169356 
 127.199556 35.759667 210.522818 
 127.199778 35.759667 207.861107 
 127.200000 35.759667 206.051611 
 127.200111 35.759667 205.469489 
 127.200222 35.759667 205.104674 
 127.200333 35.759667 204.957900 
 127.199222 35.759778 215.805523 
 127.199333 35.759778 213.656810 
 127.199444 35.759778 211.714289 
 127.199556 35.759778 209.982276 
 127.199778 35.759778 207.149116 
 127.200000 35.759778 205.167587 
 127.200111 35.759778 204.499188 
 127.200222 35.759778 204.048014 
 127.200333 35.759778 203.814657 
 127.199333 35.759778 213.656810 
 127.199444 35.759778 211.714289 
 127.199556 35.759778 209.982276 
 127.199667 35.759778 208.459330 
 127.199889 35.759778 206.050866 
 127.200111 35.759778 204.499188 
 127.200222 35.759778 204.048014 
 127.200333 35.759778 203.814657 
 127.200444 35.759778 203.800787 
 127.199333 35.759889 213.328612 
 127.199444 35.759889 211.300784 
 127.199556 35.759889 209.483390 
 127.199667 35.759889 207.874855 
 127.199889 35.759889 205.294845 
 127.200111 35.759889 203.571031 
 127.200222 35.759889 203.033595 
 127.200333 35.759889 202.713755 
 127.200444 35.759889 202.613314 
 127.199333 35.760000 213.040867 
 127.199444 35.760000 210.927532 
 127.199556 35.760000 209.024560 
 127.199667 35.760000 207.330236 
 127.199889 35.760000 204.578284 
 127.200111 35.760000 202.681936 
 127.200222 35.760000 202.058040 
 127.200333 35.760000 201.651518 
 127.200444 35.760000 201.464308 
 127.199444 35.760000 210.927532 
 127.199556 35.760000 209.024560 
 127.199667 35.760000 207.330236 
 127.199778 35.760000 205.848492 
 127.200000 35.760000 203.522888 
 127.200222 35.760000 202.058040 
 127.200333 35.760000 201.651518 
 127.200444 35.760000 201.464308 
 127.200556 35.760000 201.497421 
 127.199444 35.760111 210.595399 
 127.199556 35.760111 208.606795 
 127.199667 35.760111 206.826631 
 127.199778 35.760111 205.258971 
 127.200000 35.760111 202.761028 
 127.200222 35.760111 201.123244 
 127.200333 35.760111 200.629990 
 127.200444 35.760111 200.355960 
 127.200556 35.760111 200.302028 
 127.199444 35.760222 210.304966 
 127.199556 35.760222 208.230825 
 127.199667 35.760222 206.364916 
 127.199778 35.760222 204.711435 
 127.200000 35.760222 202.041347 
 127.200222 35.760222 200.230822 
 127.200333 35.760222 199.650934 
 127.200444 35.760222 199.290184 
 127.200556 35.760222 199.149307 
 127.199556 35.760222 208.230825 
 127.199667 35.760222 206.364916 
 127.199778 35.760222 204.711435 
 127.199889 35.760222 203.269066 
 127.200111 35.760222 201.027640 
 127.200333 35.760222 199.650934 
 127.200444 35.760222 199.290184 
 127.200556 35.760222 199.149307 
 127.200667 35.760222 199.229976 
 127.199556 35.760333 207.895472 
 127.199667 35.760333 205.943618 
 127.199778 35.760333 204.204117 
 127.199889 35.760333 202.675514 
 127.200111 35.760333 200.261247 
 127.200333 35.760333 198.711095 
 127.200444 35.760333 198.263425 
 127.200556 35.760333 198.035402 
 127.200667 35.760333 198.028767 
 127.199556 35.760444 207.602006 
 127.199667 35.760444 205.564301 
 127.199778 35.760444 203.738874 
 127.199889 35.760444 202.124134 
 127.200111 35.760444 199.537218 
 127.200333 35.760444 197.813817 
 127.200444 35.760444 197.279324 
 127.200556 35.760444 196.964255 
 127.200667 35.760444 196.870415 
 127.199667 35.760556 205.225777 
 127.199778 35.760556 203.314223 
 127.199889 35.760556 201.613144 
 127.200000 35.760556 200.126479 
 127.200222 35.760556 197.796515 
 127.200444 35.760556 196.334609 
 127.200556 35.760556 195.932292 
 127.200667 35.760556 195.751046 
 127.200778 35.760556 195.792056 
 127.199667 35.760667 204.929325 
 127.199778 35.760667 202.931738 
 127.199889 35.760667 201.144416 
 127.200000 35.760667 199.571430 
 127.200222 35.760667 197.068309 
 127.200444 35.760667 195.432639 
 127.200556 35.760667 194.943173 
 127.200667 35.760667 194.674621 
 127.200778 35.760667 194.628233 
 127.199667 35.760778 204.674043 
 127.199778 35.760778 202.590222 
 127.199889 35.760778 200.716453 
 127.200000 35.760778 199.056943 
 127.200222 35.760778 196.380262 
 127.200444 35.760778 194.570424 
 127.200556 35.760778 193.993607 
 127.200667 35.760778 193.637546 
 127.200778 35.760778 193.503558 
 127.199778 35.760778 202.590222 
 127.199889 35.760778 200.716453 
 127.200000 35.760778 199.056943 
 127.200111 35.760778 197.610364 
 127.200333 35.760778 195.365990 
 127.200556 35.760778 193.993607 
 127.200667 35.760778 193.637546 
 127.200778 35.760778 193.503558 
 127.200889 35.760778 193.592735 
 127.199778 35.760889 202.290963 
 127.199889 35.760889 200.330843 
 127.200000 35.760889 198.584904 
 127.200111 35.760889 197.051681 
 127.200333 35.760889 194.633637 
 127.200556 35.760889 193.086972 
 127.200667 35.760889 192.643500 
 127.200778 35.760889 192.422011 
 127.200889 35.760889 192.423457 
 127.199778 35.761000 202.033050 
 127.199889 35.761000 199.986374 
 127.200000 35.761000 198.153803 
 127.200111 35.761000 196.533733 
 127.200333 35.761000 193.941613 
 127.200556 35.761000 192.220260 
 127.200667 35.761000 191.689175 
 127.200778 35.761000 191.379982 
 127.200889 35.761000 191.293494 
 127.199889 35.761000 199.986374 
 127.200000 35.761000 198.153803 
 127.200111 35.761000 196.533733 
 127.200222 35.761000 195.129977 
 127.200444 35.761000 192.971785 
 127.200667 35.761000 191.689175 
 127.200778 35.761000 191.379982 
 127.200889 35.761000 191.293494 
 127.201000 35.761000 191.431149 
 127.199889 35.761111 199.683865 
 127.200000 35.761111 197.764607 
 127.200111 35.761111 196.057635 
 127.200222 35.761111 194.566897 
 127.200444 35.761111 192.234217 
 127.200667 35.761111 190.776431 
 127.200778 35.761111 190.379482 
 127.200889 35.761111 190.205008 
 127.201000 35.761111 190.254583 
 127.199889 35.761222 199.423843 
 127.200000 35.761222 197.417992 
 127.200111 35.761222 195.624213 
 127.200222 35.761222 194.046587 
 127.200444 35.761222 191.539612 
 127.200667 35.761222 189.906845 
 127.200778 35.761222 189.422237 
 127.200889 35.761222 189.159875 
 127.201000 35.761222 189.121469 
 127.200000 35.761222 197.417992 
 127.200111 35.761222 195.624213 
 127.200222 35.761222 194.046587 
 127.200333 35.761222 192.683916 
 127.200556 35.761222 190.613165 
 127.200778 35.761222 189.422237 
 127.200889 35.761222 189.159875 
 127.201000 35.761222 189.121469 
 127.201111 35.761222 189.308259 
 127.200000 35.761333 197.112883 
 127.200111 35.761333 195.232092 
 127.200222 35.761333 193.567375 
 127.200333 35.761333 192.117392 
 127.200556 35.761333 189.871630 
 127.200778 35.761333 188.505066 
 127.200889 35.761333 188.154612 
 127.201000 35.761333 188.028021 
 127.201111 35.761333 188.126392 
 127.200000 35.761444 196.850446 
 127.200111 35.761444 194.882736 
 127.200222 35.761444 193.131021 
 127.200333 35.761444 191.593824 
 127.200556 35.761444 189.173242 
 127.200778 35.761444 187.631235 
 127.200889 35.761444 187.192787 
 127.201000 35.761444 186.978108 
 127.201111 35.761444 186.988160 
 127.200111 35.761444 194.882736 
 127.200222 35.761444 193.131021 
 127.200333 35.761444 191.593824 
 127.200444 35.761444 190.274827 
 127.200667 35.761444 188.291471 
 127.200889 35.761444 187.192787 
 127.201000 35.761444 186.978108 
 127.201111 35.761444 186.988160 
 127.201222 35.761444 187.224226 
 127.200111 35.761556 194.575060 
 127.200222 35.761556 192.736142 
 127.200333 35.761556 191.111523 
 127.200444 35.761556 189.705022 
 127.200667 35.761556 187.546058 
 127.200889 35.761556 186.271203 
 127.201000 35.761556 185.968232 
 127.201111 35.761556 185.889759 
 127.201222 35.761556 186.037204 
 127.200111 35.761667 194.310239 
 127.200222 35.761667 192.384211 
 127.200333 35.761667 190.672265 
 127.200444 35.761667 189.178355 
 127.200667 35.761667 186.843973 
 127.200889 35.761667 185.393141 
 127.201000 35.761667 185.001976 
 127.201111 35.761667 184.835076 
 127.201222 35.761667 184.893998 
 127.200222 35.761667 192.384211 
 127.200333 35.761667 190.672265 
 127.200444 35.761667 189.178355 
 127.200556 35.761667 187.901412 
 127.200778 35.761667 186.007891 
 127.201000 35.761667 185.001976 
 127.201111 35.761667 184.835076 
 127.201222 35.761667 184.893998 
 127.201333 35.761667 185.180137 
 127.200222 35.761778 192.074133 
 127.200333 35.761778 190.274654 
 127.200444 35.761778 188.693127 
 127.200556 35.761778 187.328347 
 127.200778 35.761778 185.258753 
 127.201000 35.761778 184.076128 
 127.201111 35.761778 183.820595 
 127.201222 35.761778 183.790788 
 127.201333 35.761778 183.987962 
 127.200222 35.761889 191.806668 
 127.200333 35.761889 189.919598 
 127.200444 35.761889 188.250400 
 127.200556 35.761889 186.797726 
 127.200778 35.761889 184.551946 
 127.201000 35.761889 183.192502 
 127.201111 35.761889 182.848280 
 127.201222 35.761889 182.729691 
 127.201333 35.761889 182.837845 
 127.200333 35.761889 189.919598 
 127.200444 35.761889 188.250400 
 127.200556 35.761889 186.797726 
 127.200667 35.761889 185.564245 
 127.200889 35.761889 183.760523 
 127.201111 35.761889 182.848280 
 127.201222 35.761889 182.729691 
 127.201333 35.761889 182.837845 
 127.201444 35.761889 183.173871 
 127.200333 35.762000 189.607717 
 127.200444 35.762000 187.850940 
 127.200556 35.762000 186.310466 
 127.200667 35.762000 184.989033 
 127.200889 35.762000 183.009002 
 127.201111 35.762000 181.919809 
 127.201222 35.762000 181.712535 
 127.201333 35.762000 181.731768 
 127.201444 35.762000 181.978775 
 127.200333 35.762111 189.338053 
 127.200444 35.762111 187.493490 
 127.200556 35.762111 185.865008 
 127.200667 35.762111 184.455413 
 127.200889 35.762111 182.298657 
 127.201111 35.762111 181.032100 
 127.201222 35.762111 180.735933 
 127.201333 35.762111 180.666037 
 127.201444 35.762111 180.823817 
 127.200444 35.762111 187.493490 
 127.200556 35.762111 185.865008 
 127.200667 35.762111 184.455413 
 127.200778 35.762111 183.266824 
 127.201000 35.762111 181.553710 
 127.201222 35.762111 180.735933 
 127.201333 35.762111 180.666037 
 127.201444 35.762111 180.823817 
 127.201556 35.762111 181.210820 
 127.200444 35.762222 187.179393 
 127.200556 35.762222 185.462999 
 127.200667 35.762222 183.965336 
 127.200778 35.762222 182.688594 
 127.201000 35.762222 180.798628 
 127.201222 35.762222 179.803354 
 127.201333 35.762222 179.644427 
 127.201444 35.762222 179.713078 
 127.201556 35.762222 180.010714 
 127.200444 35.762333 186.907688 
 127.200556 35.762333 185.103170 
 127.200667 35.762333 183.517231 
 127.200778 35.762333 182.152126 
 127.201000 35.762333 180.084892 
 127.201222 35.762333 178.911702 
 127.201333 35.762333 178.663536 
 127.201444 35.762333 178.642850 
 127.201556 35.762333 178.850908 
 127.200556 35.762333 185.103170 
 127.200667 35.762333 183.517231 
 127.200778 35.762333 182.152126 
 127.200889 35.762333 181.006989 
 127.201111 35.762333 179.385669 
 127.201333 35.762333 178.663536 
 127.201444 35.762333 178.642850 
 127.201556 35.762333 178.850908 
 127.201667 35.762333 179.288682 
 127.200556 35.762444 184.786876 
 127.200667 35.762444 183.112755 
 127.200778 35.762444 181.659382 
 127.200889 35.762444 180.425750 
 127.201111 35.762444 178.627032 
 127.201333 35.762444 177.726848 
 127.201444 35.762444 177.616923 
 127.201556 35.762444 177.735503 
 127.201667 35.762444 178.083697 
 127.200556 35.762556 184.513146 
 127.200667 35.762556 182.750631 
 127.200778 35.762556 181.208780 
 127.200889 35.762556 179.886444 
 127.201111 35.762556 177.909907 
 127.201333 35.762556 176.831253 
 127.201444 35.762556 176.631879 
 127.201556 35.762556 176.660770 
 127.201667 35.762556 176.919176 
 127.200667 35.762556 182.750631 
 127.200778 35.762556 181.208780 
 127.200889 35.762556 179.886444 
 127.201000 35.762556 178.786968 
 127.201222 35.762556 177.257914 
 127.201444 35.762556 176.631879 
 127.201556 35.762556 176.660770 
 127.201667 35.762556 176.919176 
 127.201778 35.762556 177.408800 
 127.200667 35.762667 182.431711 
 127.200778 35.762667 180.801323 
 127.200889 35.762667 179.390224 
 127.201000 35.762667 178.201896 
 127.201222 35.762667 176.494585 
 127.201444 35.762667 175.689634 
 127.201556 35.762667 175.628781 
 127.201667 35.762667 175.797343 
 127.201778 35.762667 176.196879 
 127.200667 35.762778 182.156548 
 127.200778 35.762778 180.437716 
 127.200889 35.762778 178.937948 
 127.201000 35.762778 177.660863 
 127.201222 35.762778 175.775486 
 127.201444 35.762778 174.791813 
 127.201556 35.762778 174.641313 
 127.201667 35.762778 174.720127 
 127.201778 35.762778 175.029674 
 127.200778 35.762778 180.437716 
 127.200889 35.762778 178.937948 
 127.201000 35.762778 177.660863 
 127.201111 35.762778 176.605733 
 127.201333 35.762778 175.170102 
 127.201556 35.762778 174.641313 
 127.201667 35.762778 174.720127 
 127.201778 35.762778 175.029674 
 127.201889 35.762778 175.570765 
 127.200778 35.762889 180.116824 
 127.200889 35.762889 178.528176 
 127.201000 35.762889 177.162123 
 127.201111 35.762889 176.017793 
 127.201333 35.762889 174.403348 
 127.201556 35.762889 173.695079 
 127.201667 35.762889 173.683936 
 127.201778 35.762889 173.903282 
 127.201889 35.762889 174.354069 
 127.200778 35.763000 179.839868 
 127.200889 35.763000 178.162432 
 127.201000 35.763000 176.707504 
 127.201111 35.763000 175.474071 
 127.201333 35.763000 173.681001 
 127.201556 35.763000 172.793447 
 127.201667 35.763000 172.692442 
 127.201778 35.763000 172.821686 
 127.201889 35.763000 173.182268 
 127.200889 35.763000 178.162432 
 127.201000 35.763000 176.707504 
 127.201111 35.763000 175.474071 
 127.201222 35.763000 174.465338 
 127.201444 35.763000 173.123567 
 127.201667 35.763000 172.692442 
 127.201778 35.763000 172.821686 
 127.201889 35.763000 173.182268 
 127.202000 35.763000 173.776049 
 127.200889 35.763111 177.839575 
 127.201000 35.763111 176.295559 
 127.201111 35.763111 174.972810 
 127.201222 35.763111 173.874669 
 127.201444 35.763111 172.353520 
 127.201667 35.763111 171.742348 
 127.201778 35.763111 171.781277 
 127.201889 35.763111 172.051441 
 127.202000 35.763111 172.554559 
 127.200889 35.763222 177.560830 
 127.201000 35.763222 175.927820 
 127.201111 35.763222 174.515848 
 127.201222 35.763222 173.328394 
 127.201444 35.763222 171.628058 
 127.201667 35.763222 170.837031 
 127.201778 35.763222 170.785742 
 127.201889 35.763222 170.965587 
 127.202000 35.763222 171.378140 
 127.200889 35.763333 177.325356 
 127.201000 35.763333 175.603138 
 127.201111 35.763333 174.101729 
 127.201222 35.763333 172.824748 
 127.201444 35.763333 170.944798 
 127.201667 35.763333 169.973490 
 127.201778 35.763333 169.831770 
 127.201889 35.763333 169.921082 
 127.202000 35.763333 170.242857 
 127.201000 35.763333 175.603138 
 127.201111 35.763333 174.101729 
 127.201222 35.763333 172.824748 
 127.201333 35.763333 171.771463 
 127.201556 35.763333 170.344733 
 127.201778 35.763333 169.831770 
 127.201889 35.763333 169.921082 
 127.202000 35.763333 170.242857 
 127.202111 35.763333 170.797882 
 127.201000 35.763444 175.322745 
 127.201111 35.763444 173.731993 
 127.201222 35.763444 172.365579 
 127.201333 35.763444 171.222628 
 127.201556 35.763444 169.616143 
 127.201778 35.763444 168.922753 
 127.201889 35.763444 168.921629 
 127.202000 35.763444 169.152723 
 127.202111 35.763444 169.616963 
 127.201000 35.763556 175.085793 
 127.201111 35.763556 173.405483 
 127.201222 35.763556 171.949422 
 127.201333 35.763556 170.716591 
 127.201556 35.763556 168.929921 
 127.201778 35.763556 168.055674 
 127.201889 35.763556 167.963901 
 127.202000 35.763556 168.104100 
 127.202111 35.763556 168.477340 
 127.201111 35.763556 173.405483 
 127.201222 35.763556 171.949422 
 127.201333 35.763556 170.716591 
 127.201444 35.763556 169.710192 
 127.201667 35.763556 168.378277 
 127.201889 35.763556 167.963901 
 127.202000 35.763556 168.104100 
 127.202111 35.763556 168.477340 
 127.202222 35.763556 169.085499 
 127.201111 35.763667 173.122991 
 127.201222 35.763667 171.577221 
 127.201333 35.763667 170.254449 
 127.201444 35.763667 169.158016 
 127.201667 35.763667 167.645463 
 127.201889 35.763667 167.049770 
 127.202000 35.763667 167.099015 
 127.202111 35.763667 167.381197 
 127.202222 35.763667 167.898049 
 127.201111 35.763778 172.885006 
 127.201222 35.763778 171.249620 
 127.201333 35.763778 169.837000 
 127.201444 35.763778 168.650628 
 127.201667 35.763778 166.957626 
 127.201889 35.763778 166.180808 
 127.202000 35.763778 166.139196 
 127.202111 35.763778 166.330417 
 127.202222 35.763778 166.756060 
 127.201222 35.763778 171.249620 
 127.201333 35.763778 169.837000 
 127.201444 35.763778 168.650628 
 127.201556 35.763778 167.689910 
 127.201778 35.763778 166.453902 
 127.202000 35.763778 166.139196 
 127.202111 35.763778 166.330417 
 127.202222 35.763778 166.756060 
 127.202333 35.763778 167.416748 
 127.201222 35.763889 170.965607 
 127.201333 35.763889 169.462924 
 127.201444 35.763889 168.186395 
 127.201556 35.763889 167.135285 
 127.201778 35.763889 165.718061 
 127.202000 35.763889 165.221453 
 127.202111 35.763889 165.321498 
 127.202222 35.763889 165.655716 
 127.202333 35.763889 166.224871 
 127.201222 35.764000 170.726275 
 127.201333 35.764000 169.133622 
 127.201444 35.764000 167.767030 
 127.201556 35.764000 166.625622 
 127.201778 35.764000 165.027371 
 127.202000 35.764000 164.349054 
 127.202111 35.764000 164.358019 
 127.202222 35.764000 164.600910 
 127.202333 35.764000 165.078631 
 127.201333 35.764000 169.133622 
 127.201444 35.764000 167.767030 
 127.201556 35.764000 166.625622 
 127.201667 35.764000 165.712456 
 127.201889 35.764000 164.572715 
 127.202111 35.764000 164.358019 
 127.202222 35.764000 164.600910 
 127.202333 35.764000 165.078631 
 127.202444 35.764000 165.793223 
 127.201333 35.764111 168.848077 
 127.201444 35.764111 167.391205 
 127.201556 35.764111 166.159283 
 127.201667 35.764111 165.155506 
 127.201889 35.764111 163.833964 
 127.202111 35.764111 163.436779 
 127.202222 35.764111 163.588125 
 127.202333 35.764111 163.974195 
 127.202444 35.764111 164.596884 
 127.201333 35.764222 168.607387 
 127.201444 35.764222 167.060329 
 127.201556 35.764222 165.737984 
 127.201667 35.764222 164.643691 
 127.201889 35.764222 163.140539 
 127.202111 35.764222 162.561056 
 127.202222 35.764222 162.620955 
 127.202333 35.764222 162.915472 
 127.202444 35.764222 163.446356 
 127.201444 35.764222 167.060329 
 127.201556 35.764222 165.737984 
 127.201667 35.764222 164.643691 
 127.201778 35.764222 163.776999 
 127.202000 35.764222 162.734587 
 127.202222 35.764222 162.620955 
 127.202333 35.764222 162.915472 
 127.202444 35.764222 163.446356 
 127.202556 35.764222 164.214063 
 127.201444 35.764333 166.773378 
 127.201556 35.764333 165.360394 
 127.201667 35.764333 164.175365 
 127.201778 35.764333 163.217700 
 127.202000 35.764333 161.992900 
 127.202222 35.764333 161.696184 
 127.202333 35.764333 161.898929 
 127.202444 35.764333 162.337790 
 127.202556 35.764333 163.013365 
 127.201444 35.764445 166.531078 
 127.201556 35.764445 165.027391 
 127.201667 35.764445 163.751565 
 127.201778 35.764445 162.702863 
 127.202000 35.764445 161.295551 
 127.202222 35.764445 160.815629 
 127.202333 35.764445 160.926542 
 127.202444 35.764445 161.273319 
 127.202556 35.764445 161.856701 
 127.201556 35.764445 165.027391 
 127.201667 35.764445 163.751565 
 127.201778 35.764445 162.702863 
 127.201889 35.764445 161.884196 
 127.202111 35.764445 160.939122 
 127.202333 35.764445 160.926542 
 127.202444 35.764445 161.273319 
 127.202556 35.764445 161.856701 
 127.202667 35.764445 162.678891 
 127.201556 35.764556 164.739549 
 127.201667 35.764556 163.373019 
 127.201778 35.764556 162.233375 
 127.201889 35.764556 161.323668 
 127.202111 35.764556 160.195927 
 127.202333 35.764556 159.999980 
 127.202444 35.764556 160.254771 
 127.202556 35.764556 160.746058 
 127.202667 35.764556 161.475899 
 127.201556 35.764667 164.495995 
 127.201667 35.764667 163.038540 
 127.201778 35.764667 161.807734 
 127.201889 35.764667 160.806767 
 127.202111 35.764667 159.495921 
 127.202333 35.764667 159.116169 
 127.202444 35.764667 159.278753 
 127.202556 35.764667 159.677726 
 127.202667 35.764667 160.314997 
 127.201667 35.764667 163.038540 
 127.201778 35.764667 161.807734 
 127.201889 35.764667 160.806767 
 127.202000 35.764667 160.035337 
 127.202222 35.764667 159.188946 
 127.202444 35.764667 159.278753 
 127.202556 35.764667 159.677726 
 127.202667 35.764667 160.314997 
 127.202778 35.764667 161.190854 
 127.201667 35.764778 162.749395 
 127.201778 35.764778 161.427520 
 127.201889 35.764778 160.335387 
 127.202000 35.764778 159.472548 
 127.202222 35.764778 158.442894 
 127.202444 35.764778 158.348734 
 127.202556 35.764778 158.655489 
 127.202667 35.764778 159.200289 
 127.202778 35.764778 159.983562 
 127.201667 35.764889 162.504705 
 127.201778 35.764889 161.091539 
 127.201889 35.764889 159.908020 
 127.202000 35.764889 158.953552 
 127.202222 35.764889 157.740194 
 127.202444 35.764889 157.461624 
 127.202556 35.764889 157.675942 
 127.202667 35.764889 158.128049 
 127.202778 35.764889 158.818519 
 127.201778 35.764889 161.091539 
 127.201889 35.764889 159.908020 
 127.202000 35.764889 158.953552 
 127.202111 35.764889 158.230899 
 127.202333 35.764889 157.483478 
 127.202556 35.764889 157.675942 
 127.202667 35.764889 158.128049 
 127.202778 35.764889 158.818519 
 127.202889 35.764889 159.749721 
 127.201778 35.765000 160.801064 
 127.201889 35.765000 159.526250 
 127.202000 35.765000 158.480248 
 127.202111 35.765000 157.665959 
 127.202333 35.765000 156.734674 
 127.202556 35.765000 156.742563 
 127.202667 35.765000 157.102076 
 127.202778 35.765000 157.699840 
 127.202889 35.765000 158.538078 
 127.201778 35.765111 160.555210 
 127.201889 35.765111 159.188881 
 127.202000 35.765111 158.051122 
 127.202111 35.765111 157.144977 
 127.202333 35.765111 156.029384 
 127.202556 35.765111 155.852255 
 127.202667 35.765111 156.118951 
 127.202778 35.765111 156.623788 
 127.202889 35.765111 157.368841 
 127.201889 35.765111 159.188881 
 127.202000 35.765111 158.051122 
 127.202111 35.765111 157.144977 
 127.202222 35.765111 156.470289 
 127.202444 35.765111 155.822840 
 127.202667 35.765111 156.118951 
 127.202778 35.765111 156.623788 
 127.202889 35.765111 157.368841 
 127.203000 35.765111 158.354225 
 127.201889 35.765222 158.897187 
 127.202000 35.765222 157.667764 
 127.202111 35.765222 156.669856 
 127.202222 35.765222 155.903161 
 127.202444 35.765222 155.071241 
 127.202667 35.765222 155.182165 
 127.202778 35.765222 155.594173 
 127.202889 35.765222 156.246138 
 127.203000 35.765222 157.138321 
 127.201889 35.765333 158.650280 
 127.202000 35.765333 157.328971 
 127.202111 35.765333 156.239078 
 127.202222 35.765333 155.380152 
 127.202444 35.765333 154.363316 
 127.202667 35.765333 154.288609 
 127.202778 35.765333 154.607564 
 127.202889 35.765333 155.166219 
 127.203000 35.765333 155.964979 
 127.202000 35.765445 157.035558 
 127.202111 35.765445 155.853614 
 127.202222 35.765445 154.902392 
 127.202333 35.765445 154.184645 
 127.202556 35.765445 153.452018 
 127.202778 35.765445 153.665885 
 127.202889 35.765445 154.131167 
 127.203000 35.765445 154.836440 
 127.203111 35.765445 155.784093 
 127.202000 35.765556 156.788029 
 127.202111 35.765556 155.514127 
 127.202222 35.765556 154.470703 
 127.202333 35.765556 153.660652 
 127.202556 35.765556 152.742815 
 127.202778 35.765556 152.770752 
 127.202889 35.765556 153.142758 
 127.203000 35.765556 153.754643 
 127.203111 35.765556 154.608646 
 127.202000 35.765667 156.585647 
 127.202111 35.765667 155.219563 
 127.202222 35.765667 154.083713 
 127.202333 35.765667 153.181133 
 127.202556 35.765667 152.077638 
 127.202778 35.765667 151.919197 
 127.202889 35.765667 152.197703 
 127.203000 35.765667 152.715975 
 127.203111 35.765667 153.476104 
 127.202111 35.765667 155.219563 
 127.202222 35.765667 154.083713 
 127.202333 35.765667 153.181133 
 127.202444 35.765667 152.511671 
 127.202667 35.765667 151.879620 
 127.202889 35.765667 152.197703 
 127.203000 35.765667 152.715975 
 127.203111 35.765667 153.476104 
 127.203222 35.765667 154.478179 
 127.202111 35.765778 154.971051 
 127.202222 35.765778 153.742867 
 127.202333 35.765778 152.747853 
 127.202444 35.765778 151.985708 
 127.202667 35.765778 151.167831 
 127.202889 35.765778 151.299362 
 127.203000 35.765778 151.724119 
 127.203111 35.765778 152.390473 
 127.203222 35.765778 153.298655 
 127.202111 35.765889 154.767853 
 127.202222 35.765889 153.447110 
 127.202333 35.765889 152.359436 
 127.202444 35.765889 151.504383 
 127.202667 35.765889 150.500229 
 127.202889 35.765889 150.444758 
 127.203000 35.765889 150.775774 
 127.203111 35.765889 151.348126 
 127.203222 35.765889 152.162192 
 127.202222 35.765889 153.447110 
 127.202333 35.765889 152.359436 
 127.202444 35.765889 151.504383 
 127.202556 35.765889 150.884550 
 127.202778 35.765889 150.353285 
 127.203000 35.765889 150.775774 
 127.203111 35.765889 151.348126 
 127.203222 35.765889 152.162192 
 127.203333 35.765889 153.220529 
 127.202222 35.766000 153.197572 
 127.202333 35.766000 152.017331 
 127.202444 35.766000 151.069464 
 127.202556 35.766000 150.356713 
 127.202778 35.766000 149.639000 
 127.203000 35.766000 149.874311 
 127.203111 35.766000 150.352759 
 127.203222 35.766000 151.072807 
 127.203333 35.766000 152.036861 
 127.202222 35.766111 152.993511 
 127.202333 35.766111 151.720477 
 127.202444 35.766111 150.679569 
 127.202556 35.766111 149.873673 
 127.202778 35.766111 148.969061 
 127.203000 35.766111 149.016742 
 127.203111 35.766111 149.401060 
 127.203222 35.766111 150.026863 
 127.203333 35.766111 150.896408 
 127.202333 35.766111 151.720477 
 127.202444 35.766111 150.679569 
 127.202556 35.766111 149.873673 
 127.202667 35.766111 149.302785 
 127.202889 35.766111 148.873241 
 127.203111 35.766111 149.401060 
 127.203222 35.766111 150.026863 
 127.203333 35.766111 150.896408 
 127.203444 35.766111 152.009608 
 127.202333 35.766222 151.469619 
 127.202444 35.766222 150.335603 
 127.202556 35.766222 149.436496 
 127.202667 35.766222 148.772145 
 127.202889 35.766222 148.155205 
 127.203111 35.766222 148.494892 
 127.203222 35.766222 149.026386 
 127.203333 35.766222 149.801357 
 127.203444 35.766222 150.819866 
 127.202333 35.766333 151.265185 
 127.202444 35.766333 150.038154 
 127.202556 35.766333 149.045928 
 127.202667 35.766333 148.288209 
 127.202889 35.766333 147.484063 
 127.203111 35.766333 147.635810 
 127.203222 35.766333 148.073091 
 127.203333 35.766333 148.753586 
 127.203444 35.766333 149.677502 
 127.202444 35.766333 150.038154 
 127.202556 35.766333 149.045928 
 127.202667 35.766333 148.288209 
 127.202778 35.766333 147.767439 
 127.203000 35.766333 147.439788 
 127.203222 35.766333 148.073091 
 127.203333 35.766333 148.753586 
 127.203444 35.766333 149.677502 
 127.203556 35.766333 150.847563 
 127.202444 35.766445 149.786313 
 127.202556 35.766445 148.700742 
 127.202667 35.766445 147.849425 
 127.202778 35.766445 147.234952 
 127.203000 35.766445 146.719275 
 127.203222 35.766445 147.163810 
 127.203333 35.766445 147.749601 
 127.203444 35.766445 148.578696 
 127.203556 35.766445 149.653669 
 127.202444 35.766556 149.581063 
 127.202556 35.766556 148.402238 
 127.202667 35.766556 147.457418 
 127.202778 35.766556 146.749335 
 127.203000 35.766556 146.045821 
 127.203222 35.766556 146.301780 
 127.203333 35.766556 146.792964 
 127.203444 35.766556 147.527336 
 127.203556 35.766556 148.507319 
 127.202556 35.766556 148.402238 
 127.202667 35.766556 147.457418 
 127.202778 35.766556 146.749335 
 127.202889 35.766556 146.278138 
 127.203111 35.766556 146.053285 
 127.203333 35.766556 146.792964 
 127.203444 35.766556 147.527336 
 127.203556 35.766556 148.507319 
 127.203667 35.766556 149.732652 
 127.202556 35.766667 148.149506 
 127.202667 35.766667 147.110952 
 127.202778 35.766667 146.309032 
 127.202889 35.766667 145.743741 
 127.203111 35.766667 145.330226 
 127.203333 35.766667 145.880496 
 127.203444 35.766667 146.519916 
 127.203556 35.766667 147.404680 
 127.203667 35.766667 148.534674 
 127.202556 35.766778 147.943528 
 127.202667 35.766778 146.811335 
 127.202778 35.766778 145.915670 
 127.202889 35.766778 145.256380 
 127.203111 35.766778 144.654392 
 127.203333 35.766778 145.015446 
 127.203444 35.766778 145.560010 
 127.203556 35.766778 146.349653 
 127.203667 35.766778 147.384407 
 127.202667 35.766778 146.811335 
 127.202778 35.766778 145.915670 
 127.202889 35.766778 145.256380 
 127.203000 35.766778 144.835755 
 127.203222 35.766778 144.713837 
 127.203444 35.766778 145.560010 
 127.203556 35.766778 146.349653 
 127.203667 35.766778 147.384407 
 127.203778 35.766778 148.667167 
 127.202667 35.766889 146.557650 
 127.202778 35.766889 145.568010 
 127.202889 35.766889 144.814492 
 127.203000 35.766889 144.299529 
 127.203222 35.766889 143.988309 
 127.203444 35.766889 144.644427 
 127.203556 35.766889 145.338719 
 127.203667 35.766889 146.278002 
 127.203778 35.766889 147.465022 
 127.202667 35.767000 146.350570 
 127.202778 35.767000 145.266886 
 127.202889 35.767000 144.419070 
 127.203000 35.767000 143.809702 
 127.203222 35.767000 143.309043 
 127.203444 35.767000 143.774972 
 127.203556 35.767000 144.373846 
 127.203667 35.767000 145.217592 
 127.203778 35.767000 146.308805 
 127.202778 35.767000 145.266886 
 127.202889 35.767000 144.419070 
 127.203000 35.767000 143.809702 
 127.203111 35.767000 143.439080 
 127.203333 35.767000 143.420645 
 127.203556 35.767000 144.373846 
 127.203667 35.767000 145.217592 
 127.203778 35.767000 146.308805 
 127.203889 35.767000 147.647044 
 127.202778 35.767111 145.012809 
 127.202889 35.767111 144.070789 
 127.203000 35.767111 143.367109 
 127.203111 35.767111 142.901919 
 127.203333 35.767111 142.693861 
 127.203556 35.767111 143.456685 
 127.203667 35.767111 144.204993 
 127.203778 35.767111 145.200497 
 127.203889 35.767111 146.442905 
 127.202778 35.767222 144.805022 
 127.202889 35.767222 143.768566 
 127.203000 35.767222 142.970343 
 127.203111 35.767222 142.410352 
 127.203333 35.767222 142.012210 
 127.203556 35.767222 142.584194 
 127.203667 35.767222 143.236831 
 127.203778 35.767222 144.136394 
 127.203889 35.767222 145.282741 
 127.202889 35.767222 143.768566 
 127.203000 35.767222 142.970343 
 127.203111 35.767222 142.410352 
 127.203222 35.767222 142.090722 
 127.203444 35.767222 142.176194 
 127.203667 35.767222 143.236831 
 127.203778 35.767222 144.136394 
 127.203889 35.767222 145.282741 
 127.204000 35.767222 146.678939 
 127.202889 35.767333 143.513554 
 127.203000 35.767333 142.620881 
 127.203111 35.767333 141.966183 
 127.203222 35.767333 141.551737 
 127.203444 35.767333 141.446939 
 127.203667 35.767333 142.316545 
 127.203778 35.767333 143.120266 
 127.203889 35.767333 144.170649 
 127.204000 35.767333 145.470611 
 127.202889 35.767444 143.304992 
 127.203000 35.767444 142.317636 
 127.203111 35.767444 141.567999 
 127.203222 35.767444 141.058503 
 127.203444 35.767444 140.762970 
 127.203667 35.767444 141.441081 
 127.203778 35.767444 142.148727 
 127.203889 35.767444 143.102914 
 127.204000 35.767444 144.306407 
 127.202889 35.767555 143.143712 
 127.203000 35.767555 142.061766 
 127.203111 35.767555 141.217282 
 127.203222 35.767555 140.612830 
 127.203444 35.767555 140.126752 
 127.203667 35.767555 140.613560 
 127.203778 35.767555 141.225227 
 127.203889 35.767555 142.083317 
 127.204000 35.767555 143.190439 
 127.203000 35.767555 142.061766 
 127.203111 35.767555 141.217282 
 127.203222 35.767555 140.612830 
 127.203333 35.767555 140.248713 
 127.203556 35.767555 140.248013 
 127.203778 35.767555 141.225227 
 127.203889 35.767555 142.083317 
 127.204000 35.767555 143.190439 
 127.204111 35.767555 144.546124 
 127.203000 35.767667 141.852504 
 127.203111 35.767667 140.912940 
 127.203222 35.767667 140.213299 
 127.203333 35.767667 139.753732 
 127.203556 35.767667 139.561642 
 127.203778 35.767667 140.346702 
 127.203889 35.767667 141.108459 
 127.204000 35.767667 142.118977 
 127.204111 35.767667 143.377935 
 127.203000 35.767778 141.690685 
 127.203111 35.767778 140.656134 
 127.203222 35.767778 139.861397 
 127.203333 35.767778 139.306475 
 127.203556 35.767778 138.923185 
 127.203778 35.767778 139.516281 
 127.203889 35.767778 140.181805 
 127.204000 35.767778 141.095816 
 127.204111 35.767778 142.258144 
 127.203111 35.767778 140.656134 
 127.203222 35.767778 139.861397 
 127.203333 35.767778 139.306475 
 127.203444 35.767778 138.993484 
 127.203667 35.767778 139.096941 
 127.203889 35.767778 140.181805 
 127.204000 35.767778 141.095816 
 127.204111 35.767778 142.258144 
 127.204222 35.767778 143.671877 
 127.203111 35.767889 140.446096 
 127.203222 35.767889 139.556029 
 127.203333 35.767889 138.905516 
 127.203444 35.767889 138.496822 
 127.203667 35.767889 138.408231 
 127.203889 35.767889 139.300275 
 127.204000 35.767889 140.117545 
 127.204111 35.767889 141.183009 
 127.204222 35.767889 142.499602 
 127.203111 35.768000 140.283424 
 127.203222 35.768000 139.297954 
 127.203333 35.768000 138.551780 
 127.203444 35.768000 138.047313 
 127.203667 35.768000 137.766533 
 127.203889 35.768000 138.465618 
 127.204000 35.768000 139.186078 
 127.204111 35.768000 140.154610 
 127.204222 35.768000 141.373995 
 127.203222 35.768000 139.297954 
 127.203333 35.768000 138.551780 
 127.203444 35.768000 138.047313 
 127.203556 35.768000 137.785011 
 127.203778 35.768000 137.993103 
 127.204000 35.768000 139.186078 
 127.204111 35.768000 140.154610 
 127.204222 35.768000 141.373995 
 127.204333 35.768000 142.843583 
 127.203222 35.768111 139.087611 
 127.203333 35.768111 138.245868 
 127.203444 35.768111 137.645722 
 127.203556 35.768111 137.287477 
 127.203778 35.768111 137.303188 
 127.204000 35.768111 138.303007 
 127.204111 35.768111 139.174705 
 127.204222 35.768111 140.296979 
 127.204333 35.768111 141.669333 
 127.203222 35.768222 138.924391 
 127.203333 35.768222 137.986843 
 127.203444 35.768222 137.290781 
 127.203556 35.768222 136.836358 
 127.203778 35.768222 136.659214 
 127.204000 35.768222 137.465406 
 127.204111 35.768222 138.240032 
 127.204222 35.768222 139.264961 
 127.204333 35.768222 140.539843 
 127.203333 35.768222 137.986843 
 127.203444 35.768222 137.290781 
 127.203556 35.768222 136.836358 
 127.203667 35.768222 136.625529 
 127.203889 35.768222 136.938609 
 127.204111 35.768222 138.240032 
 127.204222 35.768222 139.264961 
 127.204333 35.768222 140.539843 
 127.204444 35.768222 142.067941 
 127.203333 35.768333 137.775709 
 127.203444 35.768333 136.983825 
 127.203556 35.768333 136.433316 
 127.203667 35.768333 136.126289 
 127.203889 35.768333 136.246321 
 127.204111 35.768333 137.353917 
 127.204222 35.768333 138.281597 
 127.204333 35.768333 139.459107 
 127.204444 35.768333 140.889553 
 127.203333 35.768444 137.611854 
 127.203444 35.768444 136.723911 
 127.203556 35.768444 136.077080 
 127.203667 35.768444 135.673617 
 127.203889 35.768444 135.600127 
 127.204111 35.768444 136.513421 
 127.204222 35.768444 137.343615 
 127.204333 35.768444 138.423515 
 127.204444 35.768444 139.756072 
 127.203444 35.768444 136.723911 
 127.203556 35.768444 136.077080 
 127.203667 35.768444 135.673617 
 127.203778 35.768444 135.514134 
 127.204000 35.768444 135.932979 
 127.204222 35.768444 137.343615 
 127.204333 35.768444 138.423515 
 127.204444 35.768444 139.756072 
 127.204556 35.768444 141.340458 
 127.203444 35.768555 136.512047 
 127.203556 35.768555 135.768988 
 127.203667 35.768555 135.269183 
 127.203778 35.768555 135.013092 
 127.204000 35.768555 135.238218 
 127.204222 35.768555 136.454350 
 127.204333 35.768555 137.436738 
 127.204444 35.768555 138.671506 
 127.204556 35.768555 140.157974 
 127.203444 35.768667 136.347620 
 127.203556 35.768667 135.508093 
 127.203667 35.768667 134.911708 
 127.203778 35.768667 134.558771 
 127.204000 35.768667 134.589701 
 127.204222 35.768667 135.610853 
 127.204333 35.768667 136.495491 
 127.204444 35.768667 137.632231 
 127.204556 35.768667 139.020544 
 127.203556 35.768667 135.508093 
 127.203667 35.768667 134.911708 
 127.203778 35.768667 134.558771 
 127.203889 35.768667 134.451076 
 127.204111 35.768667 134.975675 
 127.204333 35.768667 136.495491 
 127.204444 35.768667 137.632231 
 127.204556 35.768667 139.020544 
 127.204667 35.768667 140.663868 
 127.203556 35.768778 135.295083 
 127.203667 35.768778 134.602045 
 127.203778 35.768778 134.152189 
 127.203889 35.768778 133.947459 
 127.204111 35.768778 134.277329 
 127.204333 35.768778 135.601626 
 127.204444 35.768778 136.640266 
 127.204556 35.768778 137.930355 
 127.204667 35.768778 139.475172 
 127.203556 35.768889 135.130315 
 127.203667 35.768889 134.340717 
 127.203778 35.768889 133.794036 
 127.203889 35.768889 133.492366 
 127.204111 35.768889 133.627697 
 127.204333 35.768889 134.756668 
 127.204444 35.768889 135.697307 
 127.204556 35.768889 136.889269 
 127.204667 35.768889 138.335678 
 127.203667 35.768889 134.340717 
 127.203778 35.768889 133.794036 
 127.203889 35.768889 133.492366 
 127.204000 35.768889 133.436476 
 127.204222 35.768889 134.067575 
 127.204444 35.768889 135.697307 
 127.204556 35.768889 136.889269 
 127.204667 35.768889 138.335678 
 127.204778 35.768889 140.035521 
 127.203667 35.769000 134.126939 
 127.203778 35.769000 133.483192 
 127.203889 35.769000 133.084342 
 127.204000 35.769000 132.931003 
 127.204222 35.769000 133.366692 
 127.204444 35.769000 134.800219 
 127.204556 35.769000 135.893815 
 127.204667 35.769000 137.241575 
 127.204778 35.769000 138.842642 
 127.203667 35.769111 133.961560 
 127.203778 35.769111 133.220842 
 127.203889 35.769111 132.724905 
 127.204000 35.769111 132.474211 
 127.204222 35.769111 132.714681 
 127.204444 35.769111 133.952197 
 127.204556 35.769111 134.947524 
 127.204667 35.769111 136.196735 
 127.204778 35.769111 137.699124 
 127.203778 35.769111 133.220842 
 127.203889 35.769111 132.724905 
 127.204000 35.769111 132.474211 
 127.204111 35.769111 132.470391 
 127.204333 35.769111 133.207943 
 127.204556 35.769111 134.947524 
 127.204667 35.769111 136.196735 
 127.204778 35.769111 137.699124 
 127.204889 35.769111 139.458303 
 127.203778 35.769222 133.006195 
 127.203889 35.769222 132.412931 
 127.204000 35.769222 132.064641 
 127.204111 35.769222 131.963107 
 127.204333 35.769222 132.504565 
 127.204556 35.769222 134.047251 
 127.204667 35.769222 135.197672 
 127.204778 35.769222 136.601143 
 127.204889 35.769222 138.261118 
 127.203778 35.769333 132.840104 
 127.203889 35.769333 132.149607 
 127.204000 35.769333 131.703815 
 127.204111 35.769333 131.504662 
 127.204333 35.769333 131.850216 
 127.204556 35.769333 133.196202 
 127.204667 35.769333 134.247930 
 127.204778 35.769333 135.552582 
 127.204889 35.769333 137.113453 
 127.203778 35.769444 132.722112 
 127.203889 35.769444 131.934140 
 127.204000 35.769444 131.390604 
 127.204111 35.769444 131.093590 
 127.204333 35.769444 131.242757 
 127.204556 35.769444 132.391558 
 127.204667 35.769444 133.344353 
 127.204778 35.769444 134.549942 
 127.204889 35.769444 136.011468 
 127.203889 35.769444 131.934140 
 127.204000 35.769444 131.390604 
 127.204111 35.769444 131.093590 
 127.204222 35.769444 131.043869 
 127.204444 35.769444 131.691807 
 127.204667 35.769444 133.344353 
 127.204778 35.769444 134.549942 
 127.204889 35.769444 136.011468 
 127.205000 35.769444 137.727889 
 127.203889 35.769555 131.767385 
 127.204000 35.769555 131.126198 
 127.204111 35.769555 130.731417 
 127.204222 35.769555 130.583658 
 127.204444 35.769555 131.035004 
 127.204667 35.769555 132.490155 
 127.204778 35.769555 133.596782 
 127.204889 35.769555 134.959061 
 127.205000 35.769555 136.576105 
 127.203889 35.769667 131.648882 
 127.204000 35.769667 130.909802 
 127.204111 35.769667 130.417012 
 127.204222 35.769667 130.170971 
 127.204444 35.769667 130.425239 
 127.204667 35.769667 131.682511 
 127.204778 35.769667 132.689931 
 127.204889 35.769667 133.952720 
 127.205000 35.769667 135.470144 
 127.204000 35.769667 130.909802 
 127.204111 35.769667 130.417012 
 127.204222 35.769667 130.170971 
 127.204333 35.769667 130.173300 
 127.204556 35.769667 130.927633 
 127.204778 35.769667 132.689931 
 127.204889 35.769667 133.952720 
 127.205000 35.769667 135.470144 
 127.205111 35.769667 137.245833 
 127.204000 35.769778 130.742028 
 127.204111 35.769778 130.151153 
 127.204222 35.769778 129.806756 
 127.204333 35.769778 129.710609 
 127.204556 35.769778 130.267317 
 127.204778 35.769778 131.831183 
 127.204889 35.769778 132.994409 
 127.205000 35.769778 134.412141 
 127.205111 35.769778 136.087850 
 127.204000 35.769889 130.623151 
 127.204111 35.769889 129.934285 
 127.204222 35.769889 129.491626 
 127.204333 35.769889 129.297098 
 127.204556 35.769889 129.656373 
 127.204778 35.769889 131.022001 
 127.204889 35.769889 132.085762 
 127.205000 35.769889 133.403901 
 127.205111 35.769889 134.979731 
 127.204111 35.769889 129.934285 
 127.204222 35.769889 129.491626 
 127.204333 35.769889 129.297098 
 127.204444 35.769889 129.351631 
 127.204667 35.769889 130.213041 
 127.204889 35.769889 132.085762 
 127.205000 35.769889 133.403901 
 127.205111 35.769889 134.979731 
 127.205222 35.769889 136.812026 
 127.204111 35.770000 129.765777 
 127.204222 35.770000 129.224611 
 127.204333 35.770000 128.931458 
 127.204444 35.770000 128.887091 
 127.204667 35.770000 129.550178 
 127.204889 35.770000 131.223764 
 127.205000 35.770000 132.442065 
 127.205111 35.770000 133.917770 
 127.205222 35.770000 135.649809 
 127.204111 35.770111 129.646321 
 127.204222 35.770111 129.006742 
 127.204333 35.770111 128.615059 
 127.204444 35.770111 128.471886 
 127.204667 35.770111 128.936842 
 127.204889 35.770111 130.411487 
 127.205000 35.770111 131.530049 
 127.205111 35.770111 132.905728 
 127.205222 35.770111 134.537611 
 127.204222 35.770111 129.006742 
 127.204333 35.770111 128.615059 
 127.204444 35.770111 128.471886 
 127.204556 35.770111 128.578680 
 127.204778 35.770111 129.547046 
 127.205000 35.770111 131.530049 
 127.205111 35.770111 132.905728 
 127.205222 35.770111 134.537611 
 127.205333 35.770111 136.429502 
 127.204222 35.770222 128.837384 
 127.204333 35.770222 128.346924 
 127.204444 35.770222 128.104700 
 127.204556 35.770222 128.112322 
 127.204778 35.770222 128.881663 
 127.205000 35.770222 130.664824 
 127.205111 35.770222 131.940233 
 127.205222 35.770222 133.471713 
 127.205333 35.770222 135.262912 
 127.204222 35.770333 128.717232 
 127.204333 35.770333 128.128089 
 127.204444 35.770333 127.786909 
 127.204556 35.770333 127.695454 
 127.204778 35.770333 128.265962 
 127.205000 35.770333 129.849476 
 127.205111 35.770333 131.024712 
 127.205222 35.770333 132.455890 
 127.205333 35.770333 134.146497 
 127.204333 35.770333 128.128089 
 127.204444 35.770333 127.786909 
 127.204556 35.770333 127.695454 
 127.204667 35.770333 127.854811 
 127.204889 35.770333 128.930786 
 127.205111 35.770333 131.024712 
 127.205222 35.770333 132.455890 
 127.205333 35.770333 134.146497 
 127.205444 35.770333 136.095124 
 127.204333 35.770444 127.957915 
 127.204444 35.770444 127.517532 
 127.204556 35.770444 127.326753 
 127.204667 35.770444 127.386509 
 127.204889 35.770444 128.262752 
 127.205111 35.770444 130.156125 
 127.205222 35.770444 131.486754 
 127.205333 35.770444 133.076522 
 127.205444 35.770444 134.924177 
 127.204333 35.770556 127.836934 
 127.204444 35.770556 127.297271 
 127.204556 35.770556 127.007093 
 127.204667 35.770556 126.967172 
 127.204889 35.770556 127.643532 
 127.205111 35.770556 129.336203 
 127.205222 35.770556 130.566208 
 127.205333 35.770556 132.055063 
 127.205444 35.770556 133.801672 
 127.204444 35.770556 127.297271 
 127.204556 35.770556 127.007093 
 127.204667 35.770556 126.967172 
 127.204778 35.770556 127.178797 
 127.205000 35.770556 128.361880 
 127.205222 35.770556 130.566208 
 127.205333 35.770556 132.055063 
 127.205444 35.770556 133.801672 
 127.205556 35.770556 135.810017 
 127.204444 35.770667 127.126493 
 127.204556 35.770667 126.737010 
 127.204667 35.770667 126.597506 
 127.204778 35.770667 126.709426 
 127.205000 35.770667 127.692412 
 127.205222 35.770667 129.695818 
 127.205333 35.770667 131.083859 
 127.205444 35.770667 132.729522 
 127.205556 35.770667 134.636629 
 127.204444 35.770778 127.004723 
 127.204556 35.770778 126.515687 
 127.204667 35.770778 126.276352 
 127.204778 35.770778 126.288320 
 127.205000 35.770778 127.070712 
 127.205222 35.770778 128.872701 
 127.205333 35.770778 130.159679 
 127.205444 35.770778 131.704148 
 127.205556 35.770778 133.509768 
 127.204556 35.770778 126.515687 
 127.204667 35.770778 126.276352 
 127.204778 35.770778 126.288320 
 127.204889 35.770778 126.552835 
 127.205111 35.770778 127.843994 
 127.205333 35.770778 130.159679 
 127.205444 35.770778 131.704148 
 127.205556 35.770778 133.509768 
 127.205667 35.770778 135.574946 
 127.204556 35.770889 126.343998 
 127.204667 35.770889 126.004927 
 127.204778 35.770889 125.917037 
 127.204889 35.770889 126.081415 
 127.205111 35.770889 127.171764 
 127.205333 35.770889 129.285810 
 127.205444 35.770889 130.729184 
 127.205556 35.770889 132.433417 
 127.205667 35.770889 134.397074 
 127.204556 35.771000 126.221466 
 127.204667 35.771000 125.782411 
 127.204778 35.771000 125.594414 
 127.204889 35.771000 125.658404 
 127.205111 35.771000 126.547444 
 127.205333 35.771000 128.459353 
 127.205444 35.771000 129.801383 
 127.205556 35.771000 131.403980 
 127.205667 35.771000 133.265866 
 127.204556 35.771111 126.148626 
 127.204667 35.771111 125.609679 
 127.204778 35.771111 125.321671 
 127.204889 35.771111 125.285369 
 127.205111 35.771111 125.973294 
 127.205333 35.771111 127.683261 
 127.205444 35.771111 128.924046 
 127.205556 35.771111 130.425106 
 127.205667 35.771111 132.185322 
 127.204667 35.771111 125.609679 
 127.204778 35.771111 125.321671 
 127.204889 35.771111 125.285369 
 127.205000 35.771111 125.502055 
 127.205222 35.771111 126.699573 
 127.205444 35.771111 128.924046 
 127.205556 35.771111 130.425106 
 127.205667 35.771111 132.185322 
 127.205778 35.771111 134.208690 
 127.204667 35.771222 125.486253 
 127.204778 35.771222 125.097982 
 127.204889 35.771222 124.961139 
 127.205000 35.771222 125.077159 
 127.205222 35.771222 126.072649 
 127.205444 35.771222 128.094262 
 127.205556 35.771222 129.493535 
 127.205667 35.771222 131.151831 
 127.205778 35.771222 133.072983 
 127.204667 35.771333 125.412585 
 127.204778 35.771333 124.923974 
 127.204889 35.771333 124.686510 
 127.205000 35.771333 124.701787 
 127.205222 35.771333 125.495096 
 127.205444 35.771333 127.313695 
 127.205556 35.771333 128.611106 
 127.205667 35.771333 130.167405 
 127.205778 35.771333 131.986267 
 127.204778 35.771333 124.923974 
 127.204889 35.771333 124.686510 
 127.205000 35.771333 124.701787 
 127.205111 35.771333 124.971048 
 127.205333 35.771333 126.275978 
 127.205556 35.771333 128.611106 
 127.205667 35.771333 130.167405 
 127.205778 35.771333 131.986267 
 127.205889 35.771333 134.066072 
 127.204778 35.771444 124.799930 
 127.204889 35.771444 124.461941 
 127.205000 35.771444 124.376569 
 127.205111 35.771444 124.544899 
 127.205333 35.771444 125.647427 
 127.205556 35.771444 127.779318 
 127.205667 35.771444 129.233721 
 127.205778 35.771444 130.950391 
 127.205889 35.771444 132.927870 
 127.204778 35.771556 124.725537 
 127.204889 35.771556 124.286771 
 127.205000 35.771556 124.100499 
 127.205111 35.771556 124.167646 
 127.205333 35.771556 125.067269 
 127.205556 35.771556 126.995419 
 127.205667 35.771556 128.347674 
 127.205778 35.771556 129.961902 
 127.205889 35.771556 131.836802 
 127.204889 35.771556 124.286771 
 127.205000 35.771556 124.100499 
 127.205111 35.771556 124.167646 
 127.205222 35.771556 124.489328 
 127.205444 35.771556 125.901788 
 127.205667 35.771556 128.347674 
 127.205778 35.771556 129.961902 
 127.205889 35.771556 131.836802 
 127.206000 35.771556 133.976547 
 127.204889 35.771667 124.161715 
 127.205000 35.771667 123.874638 
 127.205111 35.771667 123.840698 
 127.205222 35.771667 124.061166 
 127.205444 35.771667 125.270501 
 127.205667 35.771667 127.512419 
 127.205778 35.771667 129.024304 
 127.205889 35.771667 130.796727 
 127.206000 35.771667 132.833697 
 127.204889 35.771778 124.086456 
 127.205000 35.771778 123.698321 
 127.205111 35.771778 123.563041 
 127.205222 35.771778 123.682044 
 127.205444 35.771778 124.687747 
 127.205667 35.771778 126.725193 
 127.205778 35.771778 128.134482 
 127.205889 35.771778 129.804174 
 127.206000 35.771778 131.738116 
 127.205000 35.771778 123.698321 
 127.205111 35.771778 123.563041 
 127.205222 35.771778 123.682044 
 127.205333 35.771778 124.056735 
 127.205556 35.771778 125.577290 
 127.205778 35.771778 128.134482 
 127.205889 35.771778 129.804174 
 127.206000 35.771778 131.738116 
 127.206111 35.771778 133.936332 
 127.205000 35.771889 123.572267 
 127.205111 35.771889 123.335742 
 127.205222 35.771889 123.353376 
 127.205333 35.771889 123.626412 
 127.205556 35.771889 124.943111 
 127.205778 35.771889 127.295604 
 127.205889 35.771889 128.862665 
 127.206000 35.771889 130.693680 
 127.206111 35.771889 132.788750 
 127.205000 35.772000 123.496156 
 127.205111 35.772000 123.158132 
 127.205222 35.772000 123.074142 
 127.205333 35.772000 123.245270 
 127.205556 35.772000 124.357606 
 127.205778 35.772000 126.504892 
 127.205889 35.772000 127.969069 
 127.206000 35.772000 129.696902 
 127.206111 35.772000 131.688572 
 127.205111 35.772000 123.158132 
 127.205222 35.772000 123.074142 
 127.205333 35.772000 123.245270 
 127.205444 35.772000 123.672461 
 127.205667 35.772000 125.300849 
 127.205889 35.772000 127.969069 
 127.206000 35.772000 129.696902 
 127.206111 35.772000 131.688572 
 127.206222 35.772000 133.943436 
 127.205111 35.772111 123.030934 
 127.205222 35.772111 122.845416 
 127.205333 35.772111 122.914730 
 127.205444 35.772111 123.239982 
 127.205667 35.772111 124.663782 
 127.205889 35.772111 127.126566 
 127.206000 35.772111 128.751318 
 127.206111 35.772111 130.639689 
 127.206222 35.772111 132.791117 
 127.205111 35.772222 122.953822 
 127.205222 35.772222 122.666522 
 127.205333 35.772222 122.633768 
 127.205444 35.772222 122.856825 
 127.205667 35.772222 124.075529 
 127.205889 35.772222 126.332366 
 127.206000 35.772222 127.853782 
 127.206111 35.772222 129.638601 
 127.206222 35.772222 131.686337 
 127.205222 35.772222 122.666522 
 127.205333 35.772222 122.633768 
 127.205444 35.772222 122.856825 
 127.205556 35.772222 123.337258 
 127.205778 35.772222 125.074013 
 127.206000 35.772222 127.853782 
 127.206111 35.772222 129.638601 
 127.206222 35.772222 131.686337 
 127.206333 35.772222 134.001428 
 127.205222 35.772333 122.538009 
 127.205333 35.772333 122.403108 
 127.205444 35.772333 122.523891 
 127.205556 35.772333 122.901761 
 127.205778 35.772333 124.432839 
 127.206000 35.772333 127.006076 
 127.206111 35.772333 128.687264 
 127.206222 35.772333 130.631231 
 127.206333 35.772333 132.842252 
 127.205222 35.772444 122.460082 
 127.205333 35.772444 122.223129 
 127.205444 35.772444 122.241734 
 127.205556 35.772444 122.517137 
 127.205778 35.772444 123.842734 
 127.206000 35.772444 126.209638 
 127.206111 35.772444 127.787295 
 127.206222 35.772444 129.627595 
 127.206333 35.772444 131.734647 
 127.205333 35.772444 122.223129 
 127.205444 35.772444 122.241734 
 127.205556 35.772444 122.517137 
 127.205667 35.772444 123.050120 
 127.205889 35.772444 124.894950 
 127.206111 35.772444 127.787295 
 127.206222 35.772444 129.627595 
 127.206333 35.772444 131.734647 
 127.206444 35.772444 134.106372 
 127.205333 35.772556 122.093324 
 127.205444 35.772556 122.009494 
 127.205556 35.772556 122.182175 
 127.205667 35.772556 122.612307 
 127.205889 35.772556 124.250719 
 127.206111 35.772556 126.935706 
 127.206222 35.772556 128.672082 
 127.206333 35.772556 130.674910 
 127.206444 35.772556 132.942270 
 127.205333 35.772667 122.014251 
 127.205444 35.772667 121.828082 
 127.205556 35.772667 121.898138 
 127.205667 35.772667 122.225515 
 127.205889 35.772667 123.657705 
 127.206111 35.772667 126.135533 
 127.206222 35.772667 127.768087 
 127.206333 35.772667 129.666791 
 127.206444 35.772667 131.829889 
 127.205333 35.772778 121.985751 
 127.205444 35.772778 121.696987 
 127.205556 35.772778 121.664158 
 127.205667 35.772778 121.888524 
 127.205889 35.772778 123.113977 
 127.206111 35.772778 125.384132 
 127.206222 35.772778 126.912606 
 127.206333 35.772778 128.706929 
 127.206444 35.772778 130.765507 
 127.205444 35.772778 121.696987 
 127.205556 35.772778 121.664158 
 127.205667 35.772778 121.888524 
 127.205778 35.772778 122.371646 
 127.206000 35.772778 124.117894 
 127.206222 35.772778 126.912606 
 127.206333 35.772778 128.706929 
 127.206444 35.772778 130.765507 
 127.206556 35.772778 133.092789 
 127.205444 35.772889 121.616769 
 127.205556 35.772889 121.481153 
 127.205667 35.772889 121.602604 
 127.205778 35.772889 121.982521 
 127.206000 35.772889 123.521803 
 127.206222 35.772889 126.108689 
 127.206333 35.772889 127.798732 
 127.206444 35.772889 129.752892 
 127.206556 35.772889 131.975453 
 127.205444 35.773000 121.587267 
 127.205556 35.773000 121.348605 
 127.205667 35.773000 121.366883 
 127.205778 35.773000 121.643336 
 127.206000 35.773000 122.975135 
 127.206222 35.773000 125.353679 
 127.206333 35.773000 126.939184 
 127.206444 35.773000 128.788668 
 127.206556 35.773000 130.906248 
 127.205556 35.773000 121.348605 
 127.205667 35.773000 121.366883 
 127.205778 35.773000 121.643336 
 127.205889 35.773000 122.178737 
 127.206111 35.773000 124.033425 
 127.206333 35.773000 126.939184 
 127.206444 35.773000 128.788668 
 127.206556 35.773000 130.906248 
 127.206667 35.773000 133.289822 
 127.205556 35.773111 121.266985 
 127.205667 35.773111 121.182008 
 127.205778 35.773111 121.354916 
 127.205889 35.773111 121.786642 
 127.206111 35.773111 123.433177 
 127.206333 35.773111 126.130001 
 127.206444 35.773111 127.874729 
 127.206556 35.773111 129.887251 
 127.206667 35.773111 132.165626 
 127.205556 35.773222 121.236413 
 127.205667 35.773222 121.048278 
 127.205778 35.773222 121.117738 
 127.205889 35.773222 121.445886 
 127.206111 35.773222 122.884465 
 127.206333 35.773222 125.372553 
 127.206444 35.773222 127.012627 
 127.206556 35.773222 128.920191 
 127.206667 35.773222 131.093470 
 127.205667 35.773222 121.048278 
 127.205778 35.773222 121.117738 
 127.205889 35.773222 121.445886 
 127.206000 35.773222 122.034444 
 127.206222 35.773222 123.996183 
 127.206444 35.773222 127.012627 
 127.206556 35.773222 128.920191 
 127.206667 35.773222 131.093470 
 127.206778 35.773222 133.537086 
 127.205667 35.773333 120.965345 
 127.205778 35.773333 120.931096 
 127.205889 35.773333 121.155407 
 127.206000 35.773333 121.639835 
 127.206222 35.773333 123.392751 
 127.206444 35.773333 126.199502 
 127.206556 35.773333 128.001850 
 127.206667 35.773333 130.069772 
 127.206778 35.773333 132.407725 
 127.205667 35.773444 120.933605 
 127.205778 35.773444 120.795744 
 127.205889 35.773444 120.916315 
 127.206000 35.773444 121.296709 
 127.206222 35.773444 122.840999 
 127.206444 35.773444 125.438260 
 127.206556 35.773444 127.135492 
 127.206667 35.773444 129.098159 
 127.206778 35.773444 131.330552 
 127.205778 35.773444 120.795744 
 127.205889 35.773444 120.916315 
 127.206000 35.773444 121.296709 
 127.206111 35.773444 121.938139 
 127.206333 35.773444 124.007913 
 127.206556 35.773444 127.135492 
 127.206667 35.773444 129.098159 
 127.206778 35.773444 131.330552 
 127.206889 35.773444 133.830385 
 127.205778 35.773556 120.711328 
 127.205889 35.773556 120.727898 
 127.206000 35.773556 121.003998 
 127.206111 35.773556 121.540921 
 127.206333 35.773556 123.401116 
 127.206556 35.773556 126.318243 
 127.206667 35.773556 128.175395 
 127.206778 35.773556 130.301967 
 127.206889 35.773556 132.695837 
 127.205778 35.773667 120.678250 
 127.205889 35.773667 120.590915 
 127.206000 35.773667 120.762818 
 127.206111 35.773667 121.195331 
 127.206333 35.773667 122.846146 
 127.206556 35.773667 125.553023 
 127.206667 35.773667 127.304761 
 127.206778 35.773667 129.325614 
 127.206889 35.773667 131.613624 
 127.205889 35.773667 120.590915 
 127.206000 35.773667 120.762818 
 127.206111 35.773667 121.195331 
 127.206222 35.773667 121.889010 
 127.206444 35.773667 124.066444 
 127.206667 35.773667 127.304761 
 127.206778 35.773667 129.325614 
 127.206889 35.773667 131.613624 
 127.207000 35.773667 134.173591 
 127.205889 35.773778 120.505007 
 127.206000 35.773778 120.572451 
 127.206111 35.773778 120.900293 
 127.206222 35.773778 121.489168 
 127.206444 35.773778 123.456265 
 127.206667 35.773778 126.483369 
 127.206778 35.773778 128.398241 
 127.206889 35.773778 130.580129 
 127.207000 35.773778 133.033665 
 127.205889 35.773889 120.470564 
 127.206000 35.773889 120.433467 
 127.206111 35.773889 120.656555 
 127.206222 35.773889 121.140545 
 127.206444 35.773889 122.897141 
 127.206667 35.773889 125.712870 
 127.206778 35.773889 127.521681 
 127.206889 35.773889 129.597367 
 127.207000 35.773889 131.944393 
 127.206000 35.773889 120.433467 
 127.206111 35.773889 120.656555 
 127.206222 35.773889 121.140545 
 127.206333 35.773889 121.887397 
 127.206556 35.773889 124.172564 
 127.206778 35.773889 127.521681 
 127.206889 35.773889 129.597367 
 127.207000 35.773889 131.944393 
 127.207111 35.773889 134.560288 
 127.206000 35.774000 120.346084 
 127.206111 35.774000 120.464516 
 127.206222 35.774000 120.843719 
 127.206333 35.774000 121.485486 
 127.206556 35.774000 123.559916 
 127.206778 35.774000 126.697418 
 127.206889 35.774000 128.667005 
 127.207000 35.774000 130.907624 
 127.207111 35.774000 133.416969 
 127.206000 35.774111 120.310114 
 127.206111 35.774111 120.323625 
 127.206222 35.774111 120.597777 
 127.206333 35.774111 121.134197 
 127.206556 35.774111 122.997364 
 127.206778 35.774111 125.922724 
 127.206889 35.774111 127.785948 
 127.207000 35.774111 129.919897 
 127.207111 35.774111 132.322429 
 127.206111 35.774222 120.234479 
 127.206222 35.774222 120.403678 
 127.206333 35.774222 120.834848 
 127.206444 35.774222 121.528511 
 127.206667 35.774222 123.709864 
 127.206889 35.774222 126.957334 
 127.207000 35.774222 128.984714 
 127.207111 35.774222 131.280537 
 127.207222 35.774222 133.849609 
 127.206111 35.774333 120.196881 
 127.206222 35.774333 120.260863 
 127.206333 35.774333 120.586520 
 127.206444 35.774333 121.174535 
 127.206667 35.774333 123.143859 
 127.206889 35.774333 126.178418 
 127.207000 35.774333 128.098967 
 127.207111 35.774333 130.287816 
 127.207222 35.774333 132.749603 
 127.206111 35.774444 120.211073 
 127.206222 35.774444 120.169934 
 127.206333 35.774444 120.390175 
 127.206444 35.774444 120.872643 
 127.206667 35.774444 122.630137 
 127.206889 35.774444 125.451988 
 127.207000 35.774444 127.265806 
 127.207111 35.774444 129.347784 
 127.207222 35.774444 131.702391 
 127.206222 35.774444 120.169934 
 127.206333 35.774444 120.390175 
 127.206444 35.774444 120.872643 
 127.206556 35.774444 121.619289 
 127.206778 35.774444 123.907972 
 127.207000 35.774444 127.265806 
 127.207111 35.774444 129.347784 
 127.207222 35.774444 131.702391 
 127.207333 35.774444 134.327137 
 127.206222 35.774556 120.130690 
 127.206333 35.774556 120.245250 
 127.206444 35.774556 120.621905 
 127.206556 35.774556 121.262438 
 127.206778 35.774556 123.338323 
 127.207000 35.774556 126.482473 
 127.207111 35.774556 128.457315 
 127.207222 35.774556 130.704475 
 127.207333 35.774556 133.221632 
 127.206222 35.774667 120.143377 
 127.206333 35.774667 120.152354 
 127.206444 35.774667 120.423293 
 127.206556 35.774667 120.957813 
 127.206778 35.774667 122.821099 
 127.207000 35.774667 125.751769 
 127.207111 35.774667 127.619578 
 127.207222 35.774667 129.759395 
 127.207333 35.774667 132.169065 
 127.206333 35.774667 120.152354 
 127.206444 35.774667 120.423293 
 127.206556 35.774667 120.957813 
 127.206667 35.774667 121.756266 
 127.206889 35.774667 124.151839 
 127.207111 35.774667 127.619578 
 127.207222 35.774667 129.759395 
 127.207333 35.774667 132.169065 
 127.207444 35.774667 134.853570 
 127.206333 35.774778 120.111277 
 127.206444 35.774778 120.276235 
 127.206556 35.774778 120.704474 
 127.206667 35.774778 121.396513 
 127.206889 35.774778 123.578516 
 127.207111 35.774778 126.831796 
 127.207222 35.774778 128.864004 
 127.207333 35.774778 131.165922 
 127.207444 35.774778 133.742362 
 127.206333 35.774889 120.122335 
 127.206444 35.774889 120.181228 
 127.206556 35.774889 120.503103 
 127.206667 35.774889 121.088644 
 127.206889 35.774889 123.056910 
 127.207111 35.774889 126.095565 
 127.207222 35.774889 128.020082 
 127.207333 35.774889 130.214167 
 127.207444 35.774889 132.682460 
 127.206444 35.774889 120.181228 
 127.206556 35.774889 120.503103 
 127.206667 35.774889 121.088644 
 127.206778 35.774889 121.939961 
 127.207000 35.774889 124.442438 
 127.207222 35.774889 128.020082 
 127.207333 35.774889 130.214167 
 127.207444 35.774889 132.682460 
 127.207556 35.774889 135.422290 
 127.206444 35.775000 120.138412 
 127.206556 35.775000 120.354021 
 127.206667 35.775000 120.833163 
 127.206778 35.775000 121.577779 
 127.207000 35.775000 123.866279 
 127.207222 35.775000 127.229054 
 127.207333 35.775000 129.315409 
 127.207444 35.775000 131.675660 
 127.207556 35.775000 134.307305 
 127.206444 35.775111 120.147750 
 127.206556 35.775111 120.256825 
 127.206667 35.775111 120.629301 
 127.206778 35.775111 121.266949 
 127.207000 35.775111 123.340936 
 127.207222 35.775111 126.488308 
 127.207333 35.775111 128.466665 
 127.207444 35.775111 130.718606 
 127.207556 35.775111 133.241796 
 127.206556 35.775111 120.256825 
 127.206667 35.775111 120.629301 
 127.206778 35.775111 121.266949 
 127.206889 35.775111 122.169959 
 127.207111 35.775111 124.779236 
 127.207333 35.775111 128.466665 
 127.207444 35.775111 130.718606 
 127.207556 35.775111 133.241796 
 127.207667 35.775111 136.041390 
 127.206556 35.775222 120.211961 
 127.206667 35.775222 120.477869 
 127.206778 35.775222 121.008649 
 127.206889 35.775222 121.804654 
 127.207111 35.775222 124.199178 
 127.207333 35.775222 127.670958 
 127.207444 35.775222 129.814693 
 127.207556 35.775222 132.229534 
 127.207667 35.775222 134.920463 
 127.206556 35.775333 120.219385 
 127.206667 35.775333 120.378456 
 127.206778 35.775333 120.802099 
 127.206889 35.775333 121.490832 
 127.207111 35.775333 123.670064 
 127.207333 35.775333 126.925659 
 127.207444 35.775333 128.960919 
 127.207556 35.775333 131.267142 
 127.207667 35.775333 133.849138 
 127.206667 35.775333 120.378456 
 127.206778 35.775333 120.802099 
 127.206889 35.775333 121.490832 
 127.207000 35.775333 122.446924 
 127.207222 35.775333 125.163359 
 127.207444 35.775333 128.960919 
 127.207556 35.775333 131.267142 
 127.207667 35.775333 133.849138 
 127.207778 35.775333 136.704054 
 127.206667 35.775444 120.331515 
 127.206778 35.775444 120.648119 
 127.206889 35.775444 121.229680 
 127.207000 35.775444 122.078296 
 127.207222 35.775444 124.579197 
 127.207444 35.775444 128.160325 
 127.207556 35.775444 130.358034 
 127.207667 35.775444 132.831202 
 127.207778 35.775444 135.577145 
 127.206667 35.775556 120.336994 
 127.206778 35.775556 120.546290 
 127.206889 35.775556 121.020409 
 127.207000 35.775556 121.761278 
 127.207222 35.775556 124.046106 
 127.207444 35.775556 127.410264 
 127.207556 35.775556 129.499189 
 127.207667 35.775556 131.863259 
 127.207778 35.775556 134.499959 
 127.206778 35.775556 120.546290 
 127.206889 35.775556 121.020409 
 127.207000 35.775556 121.761278 
 127.207111 35.775556 122.768922 
 127.207333 35.775556 125.592016 
 127.207556 35.775556 129.499189 
 127.207667 35.775556 131.863259 
 127.207778 35.775556 134.499959 
 127.207889 35.775556 137.414618 
 127.206778 35.775667 120.497032 
 127.206889 35.775667 120.863623 
 127.207000 35.775667 121.496662 
 127.207111 35.775667 122.396338 
 127.207333 35.775667 125.002742 
 127.207556 35.775667 128.692325 
 127.207667 35.775667 130.947214 
 127.207778 35.775667 133.474588 
 127.207889 35.775667 136.279604 
 127.206778 35.775778 120.500405 
 127.206889 35.775778 120.759568 
 127.207000 35.775778 121.284875 
 127.207111 35.775778 122.076684 
 127.207333 35.775778 124.466604 
 127.207556 35.775778 127.938801 
 127.207667 35.775778 130.084614 
 127.207778 35.775778 132.502769 
 127.207889 35.775778 135.198247 
 127.206778 35.775889 120.556531 
 127.206889 35.775889 120.707994 
 127.207000 35.775889 121.125299 
 127.207111 35.775889 121.808970 
 127.207333 35.775889 123.981862 
 127.207556 35.775889 127.236133 
 127.207667 35.775889 129.272599 
 127.207778 35.775889 131.581262 
 127.207889 35.775889 134.166932 
 127.206889 35.775889 120.707994 
 127.207000 35.775889 121.125299 
 127.207111 35.775889 121.808970 
 127.207222 35.775889 122.761261 
 127.207444 35.775889 125.473871 
 127.207667 35.775889 129.272599 
 127.207778 35.775889 131.581262 
 127.207889 35.775889 134.166932 
 127.208000 35.775889 137.026744 
 127.206889 35.776000 120.709190 
 127.207000 35.776000 121.018592 
 127.207111 35.776000 121.594225 
 127.207222 35.776000 122.438173 
 127.207444 35.776000 124.933512 
 127.207667 35.776000 128.514066 
 127.207778 35.776000 130.713342 
 127.207889 35.776000 133.189310 
 127.208000 35.776000 135.939273 
 127.206889 35.776111 120.763270 
 127.207000 35.776111 120.964496 
 127.207111 35.776111 121.431820 
 127.207222 35.776111 122.167153 
 127.207444 35.776111 124.444676 
 127.207667 35.776111 127.806511 
 127.207778 35.776111 129.896130 
 127.207889 35.776111 132.262122 
 127.208000 35.776111 134.901966 
 127.207000 35.776111 120.964496 
 127.207111 35.776111 121.431820 
 127.207222 35.776111 122.167153 
 127.207333 35.776111 123.170520 
 127.207556 35.776111 125.988805 
 127.207778 35.776111 129.896130 
 127.207889 35.776111 132.262122 
 127.208000 35.776111 134.901966 
 127.208111 35.776111 137.820987 
 127.207000 35.776222 120.963309 
 127.207111 35.776222 121.322423 
 127.207222 35.776222 121.949240 
 127.207333 35.776222 122.843956 
 127.207556 35.776222 125.444181 
 127.207778 35.776222 129.132540 
 127.207889 35.776222 131.388664 
 127.208000 35.776222 133.918493 
 127.208111 35.776222 136.727181 
 127.207000 35.776333 121.015134 
 127.207111 35.776333 121.265766 
 127.207222 35.776333 121.783795 
 127.207333 35.776333 122.569586 
 127.207556 35.776333 124.951206 
 127.207778 35.776333 128.420054 
 127.207889 35.776333 130.566034 
 127.208000 35.776333 132.985576 
 127.208111 35.776333 135.683658 
 127.207111 35.776333 121.265766 
 127.207222 35.776333 121.783795 
 127.207333 35.776333 122.569586 
 127.207444 35.776333 123.625549 
 127.207667 35.776333 126.549816 
 127.207889 35.776333 130.566034 
 127.208000 35.776333 132.985576 
 127.208111 35.776333 135.683658 
 127.208222 35.776333 138.657235 
 127.207111 35.776444 121.262154 
 127.207222 35.776444 121.671496 
 127.207333 35.776444 122.348463 
 127.207444 35.776444 123.295295 
 127.207667 35.776444 126.000710 
 127.207889 35.776444 129.797168 
 127.208000 35.776444 132.106529 
 127.208111 35.776444 134.694111 
 127.208222 35.776444 137.557041 
 127.207111 35.776556 121.311685 
 127.207222 35.776556 121.612065 
 127.207333 35.776556 122.179935 
 127.207444 35.776556 123.017361 
 127.207667 35.776556 125.503377 
 127.207889 35.776556 129.079527 
 127.208000 35.776556 131.278432 
 127.208111 35.776556 133.755240 
 127.208222 35.776556 136.507250 
 127.207222 35.776556 121.612065 
 127.207333 35.776556 122.179935 
 127.207444 35.776556 123.017361 
 127.207556 35.776556 124.124204 
 127.207778 35.776556 127.153896 
 127.208000 35.776556 131.278432 
 127.208111 35.776556 133.755240 
 127.208222 35.776556 136.507250 
 127.208333 35.776556 139.539961 
 127.207222 35.776667 121.605852 
 127.207333 35.776667 122.064538 
 127.207444 35.776667 122.792471 
 127.207556 35.776667 123.789684 
 127.207778 35.776667 126.599353 
 127.208000 35.776667 130.502952 
 127.208111 35.776667 132.868902 
 127.208222 35.776667 135.509908 
 127.208333 35.776667 138.431293 
 127.207222 35.776778 121.652839 
 127.207333 35.776778 122.002441 
 127.207444 35.776778 122.620984 
 127.207556 35.776778 123.508669 
 127.207778 35.776778 126.098520 
 127.208000 35.776778 129.781393 
 127.208111 35.776778 132.036590 
 127.208222 35.776778 134.566699 
 127.208333 35.776778 137.376866 
 127.207333 35.776778 122.002441 
 127.207444 35.776778 122.620984 
 127.207556 35.776778 123.508669 
 127.207667 35.776778 124.668062 
 127.207889 35.776778 127.803463 
 127.208111 35.776778 132.036590 
 127.208222 35.776778 134.566699 
 127.208333 35.776778 137.376866 
 127.208444 35.776778 140.463866 
 127.207333 35.776889 121.993542 
 127.207444 35.776889 122.502418 
 127.207556 35.776889 123.280300 
 127.207667 35.776889 124.329579 
 127.207889 35.776889 127.244158 
 127.208111 35.776889 131.255548 
 127.208222 35.776889 133.674483 
 127.208333 35.776889 136.373157 
 127.208444 35.776889 139.348516 
 127.207333 35.777000 122.037979 
 127.207444 35.777000 122.437290 
 127.207556 35.777000 123.105470 
 127.207667 35.777000 124.044738 
 127.207889 35.777000 126.738703 
 127.208111 35.777000 130.528565 
 127.208222 35.777000 132.836435 
 127.208333 35.777000 135.423722 
 127.208444 35.777000 138.287547 
 127.207444 35.777000 122.437290 
 127.207556 35.777000 123.105470 
 127.207667 35.777000 124.044738 
 127.207778 35.777000 125.254792 
 127.208000 35.777000 128.495317 
 127.208222 35.777000 132.836435 
 127.208333 35.777000 135.423722 
 127.208444 35.777000 138.287547 
 127.208556 35.777000 141.433582 
 127.207444 35.777111 122.425486 
 127.207556 35.777111 122.983688 
 127.207667 35.777111 123.812668 
 127.207778 35.777111 124.912295 
 127.208000 35.777111 127.931199 
 127.208222 35.777111 132.049775 
 127.208333 35.777111 134.525399 
 127.208444 35.777111 137.277415 
 127.208556 35.777111 140.311317 
 127.207444 35.777222 122.467154 
 127.207556 35.777222 122.915480 
 127.207667 35.777222 123.634274 
 127.207778 35.777222 124.623578 
 127.208000 35.777222 127.421067 
 127.208222 35.777222 131.317314 
 127.208333 35.777222 133.681382 
 127.208444 35.777222 136.321696 
 127.208556 35.777222 139.243573 
 127.207444 35.777333 122.562549 
 127.207556 35.777333 122.900721 
 127.207667 35.777333 123.509052 
 127.207778 35.777333 124.387754 
 127.208000 35.777333 126.963276 
 127.208222 35.777333 130.636638 
 127.208333 35.777333 132.888873 
 127.208444 35.777333 135.417208 
 127.208556 35.777333 138.226783 
 127.207556 35.777333 122.900721 
 127.207667 35.777333 123.509052 
 127.207778 35.777333 124.387754 
 127.207889 35.777333 125.539375 
 127.208111 35.777333 128.662862 
 127.208333 35.777333 132.888873 
 127.208444 35.777333 135.417208 
 127.208556 35.777333 138.226783 
 127.208667 35.777333 141.314368 
 127.207556 35.777445 122.939684 
 127.207667 35.777445 123.437463 
 127.207778 35.777445 124.205477 
 127.207889 35.777445 125.246096 
 127.208111 35.777445 128.146985 
 127.208333 35.777445 132.149477 
 127.208444 35.777445 134.565748 
 127.208556 35.777445 137.262936 
 127.208667 35.777445 140.237985 
 127.207556 35.777556 123.032272 
 127.207667 35.777556 123.419602 
 127.207778 35.777556 124.077029 
 127.207889 35.777556 125.006750 
 127.208111 35.777556 127.685249 
 127.208333 35.777556 131.464434 
 127.208444 35.777556 133.768748 
 127.208556 35.777556 136.353657 
 127.208667 35.777556 139.216280 
 127.207667 35.777556 123.419602 
 127.207778 35.777556 124.077029 
 127.207889 35.777556 125.006750 
 127.208000 35.777556 126.208473 
 127.208222 35.777556 129.435931 
 127.208444 35.777556 133.768748 
 127.208556 35.777556 136.353657 
 127.208667 35.777556 139.216280 
 127.208778 35.777556 142.362281 
 127.207667 35.777667 123.455515 
 127.207778 35.777667 124.002077 
 127.207889 35.777667 124.820622 
 127.208000 35.777667 125.911028 
 127.208222 35.777667 128.915083 
 127.208444 35.777667 133.023572 
 127.208556 35.777667 135.495923 
 127.208667 35.777667 138.245842 
 127.208778 35.777667 141.278813 
 127.207667 35.777778 123.545189 
 127.207778 35.777778 123.980988 
 127.207889 35.777778 124.688459 
 127.208000 35.777778 125.667653 
 127.208222 35.777778 128.448513 
 127.208444 35.777778 132.332888 
 127.208556 35.777778 134.692789 
 127.208667 35.777778 137.330111 
 127.208778 35.777778 140.250161 
 127.207778 35.777778 123.980988 
 127.207889 35.777778 124.688459 
 127.208000 35.777778 125.667653 
 127.208111 35.777778 126.921272 
 127.208333 35.777778 130.252939 
 127.208556 35.777778 134.692789 
 127.208667 35.777778 137.330111 
 127.208778 35.777778 140.250161 
 127.208889 35.777778 143.449531 
 127.207778 35.777889 124.013798 
 127.207889 35.777889 124.609915 
 127.208000 35.777889 125.477617 
 127.208111 35.777889 126.619429 
 127.208333 35.777889 129.726884 
 127.208556 35.777889 133.941596 
 127.208667 35.777889 136.466042 
 127.208778 35.777889 139.272892 
 127.208889 35.777889 142.358913 
 127.207778 35.778000 124.100503 
 127.207889 35.778000 124.585368 
 127.208000 35.778000 125.341682 
 127.208111 35.778000 126.371792 
 127.208333 35.778000 129.255245 
 127.208556 35.778000 133.245032 
 127.208667 35.778000 135.656711 
 127.208778 35.778000 138.350469 
 127.208889 35.778000 141.323251 
 127.207889 35.778000 124.585368 
 127.208000 35.778000 125.341682 
 127.208111 35.778000 126.371792 
 127.208222 35.778000 127.675243 
 127.208444 35.778000 131.110483 
 127.208667 35.778000 135.656711 
 127.208778 35.778000 138.350469 
 127.208889 35.778000 141.323251 
 127.209000 35.778000 144.580888 
 127.207889 35.778111 124.614843 
 127.208000 35.778111 125.259488 
 127.208111 35.778111 126.177615 
 127.208222 35.778111 127.368943 
 127.208444 35.778111 130.579160 
 127.208667 35.778111 134.899437 
 127.208778 35.778111 137.479824 
 127.208889 35.778111 140.339086 
 127.209000 35.778111 143.482876 
 127.207889 35.778222 124.698538 
 127.208000 35.778222 125.231424 
 127.208111 35.778222 126.037479 
 127.208222 35.778222 127.116596 
 127.208444 35.778222 130.101615 
 127.208667 35.778222 134.195767 
 127.208778 35.778222 136.662695 
 127.208889 35.778222 139.408352 
 127.209000 35.778222 142.438210 
 127.208000 35.778222 125.231424 
 127.208111 35.778222 126.037479 
 127.208222 35.778222 127.116596 
 127.208333 35.778222 128.471630 
 127.208556 35.778222 132.010271 
 127.208778 35.778222 136.662695 
 127.208889 35.778222 139.408352 
 127.209000 35.778222 142.438210 
 127.209111 35.778222 145.748684 
 127.208000 35.778333 125.257507 
 127.208111 35.778333 125.951594 
 127.208222 35.778333 126.918605 
 127.208333 35.778333 128.161215 
 127.208556 35.778333 131.474409 
 127.208778 35.778333 135.900456 
 127.208889 35.778333 138.532617 
 127.209000 35.778333 141.448652 
 127.209111 35.778333 144.645156 
 127.208000 35.778445 125.337936 
 127.208111 35.778445 125.919773 
 127.208222 35.778445 126.774395 
 127.208333 35.778445 127.904300 
 127.208556 35.778445 130.991482 
 127.208778 35.778445 135.190588 
 127.208889 35.778445 137.708971 
 127.209000 35.778445 140.510903 
 127.209111 35.778445 143.593154 
 127.208111 35.778556 125.942233 
 127.208222 35.778556 126.684570 
 127.208333 35.778556 127.701876 
 127.208444 35.778556 128.993710 
 127.208667 35.778556 132.409216 
 127.208889 35.778556 136.940353 
 127.209000 35.778556 139.628290 
 127.209111 35.778556 142.596399 
 127.209222 35.778556 145.850497 
 127.208111 35.778667 126.019159 
 127.208222 35.778667 126.648929 
 127.208333 35.778667 127.553352 
 127.208444 35.778667 128.732164 
 127.208667 35.778667 131.920843 
 127.208889 35.778667 136.224221 
 127.209000 35.778667 138.797881 
 127.209111 35.778667 141.651566 
 127.209222 35.778667 144.790910 
 127.208111 35.778778 126.150397 
 127.208222 35.778778 126.667703 
 127.208333 35.778778 127.459347 
 127.208444 35.778778 128.525241 
 127.208667 35.778778 131.487307 
 127.208889 35.778778 135.563143 
 127.209000 35.778778 138.022636 
 127.209111 35.778778 140.762006 
 127.209222 35.778778 143.786708 
 127.208222 35.778778 126.667703 
 127.208333 35.778778 127.459347 
 127.208444 35.778778 128.525241 
 127.208556 35.778778 129.868211 
 127.208778 35.778778 133.386224 
 127.209000 35.778778 138.022636 
 127.209111 35.778778 140.762006 
 127.209222 35.778778 143.786708 
 127.209333 35.778778 147.093162 
 127.208222 35.778889 126.741064 
 127.208333 35.778889 127.419646 
 127.208444 35.778889 128.372339 
 127.208556 35.778889 129.601789 
 127.208778 35.778889 132.892158 
 127.209000 35.778889 137.299992 
 127.209111 35.778889 139.924763 
 127.209222 35.778889 142.834540 
 127.209333 35.778889 146.025919 
 127.208222 35.779000 126.868869 
 127.208333 35.779000 127.434493 
 127.208444 35.779000 128.274089 
 127.208556 35.779000 129.390125 
 127.208778 35.779000 132.453065 
 127.209000 35.779000 136.632538 
 127.209111 35.779000 139.142821 
 127.209222 35.779000 141.937782 
 127.209333 35.779000 145.014198 
 127.208333 35.779000 127.434493 
 127.208444 35.779000 128.274089 
 127.208556 35.779000 129.390125 
 127.208667 35.779000 130.782005 
 127.208889 35.779000 134.401838 
 127.209111 35.779000 139.142821 
 127.209222 35.779000 141.937782 
 127.209333 35.779000 145.014198 
 127.209444 35.779000 148.378050 
 127.208333 35.779111 127.504046 
 127.208444 35.779111 128.230261 
 127.208556 35.779111 129.232599 
 127.208667 35.779111 130.510640 
 127.208889 35.779111 133.902010 
 127.209111 35.779111 138.413593 
 127.209222 35.779111 141.093454 
 127.209333 35.779111 144.054622 
 127.209444 35.779111 147.302896 
 127.208333 35.779222 127.628436 
 127.208444 35.779222 128.241179 
 127.208556 35.779222 129.129729 
 127.208667 35.779222 130.293841 
 127.208889 35.779222 133.456571 
 127.209111 35.779222 137.738577 
 127.209222 35.779222 140.303252 
 127.209333 35.779222 143.149084 
 127.209444 35.779222 146.281694 
 127.208444 35.779222 128.241179 
 127.208556 35.779222 129.129729 
 127.208667 35.779222 130.293841 
 127.208778 35.779222 131.736492 
 127.209000 35.779222 135.457927 
 127.209222 35.779222 140.303252 
 127.209333 35.779222 143.149084 
 127.209444 35.779222 146.281694 
 127.209556 35.779222 149.697325 
 127.208444 35.779333 128.306792 
 127.208556 35.779333 129.081659 
 127.208667 35.779333 130.131948 
 127.208778 35.779333 131.460457 
 127.209000 35.779333 134.953002 
 127.209222 35.779333 139.568498 
 127.209333 35.779333 142.299107 
 127.209444 35.779333 145.316164 
 127.209556 35.779333 148.616093 
 127.208444 35.779444 128.427433 
 127.208556 35.779444 129.088330 
 127.208667 35.779444 130.024511 
 127.208778 35.779444 131.238592 
 127.209000 35.779444 134.501674 
 127.209222 35.779444 138.886771 
 127.209333 35.779444 141.501870 
 127.209444 35.779444 144.403087 
 127.209556 35.779444 147.587029 
 127.208556 35.779444 129.088330 
 127.208667 35.779444 130.024511 
 127.208778 35.779444 131.238592 
 127.208889 35.779444 132.729817 
 127.209111 35.779444 136.552536 
 127.209333 35.779444 141.501870 
 127.209444 35.779444 144.403087 
 127.209556 35.779444 147.587029 
 127.209667 35.779444 151.059841 
 127.208556 35.779555 129.149828 
 127.208667 35.779555 129.972006 
 127.208778 35.779555 131.071765 
 127.208889 35.779555 132.448528 
 127.209111 35.779555 136.041535 
 127.209333 35.779555 140.760217 
 127.209444 35.779555 143.545708 
 127.209556 35.779555 146.613774 
 127.209667 35.779555 149.970380 
 127.208556 35.779667 129.266471 
 127.208667 35.779667 129.974360 
 127.208778 35.779667 130.959511 
 127.208889 35.779667 132.221524 
 127.209111 35.779667 135.584246 
 127.209333 35.779667 140.071702 
 127.209444 35.779667 142.741179 
 127.209556 35.779667 145.693083 
 127.209667 35.779667 148.933195 
 127.208667 35.779667 129.974360 
 127.208778 35.779667 130.959511 
 127.208889 35.779667 132.221524 
 127.209000 35.779667 133.763526 
 127.209222 35.779667 137.687687 
 127.209444 35.779667 142.741179 
 127.209556 35.779667 145.693083 
 127.209667 35.779667 148.933195 
 127.209778 35.779667 152.457587 
 127.208667 35.779778 130.031672 
 127.208778 35.779778 130.902321 
 127.208889 35.779778 132.049692 
 127.209000 35.779778 133.476731 
 127.209222 35.779778 137.170356 
 127.209444 35.779778 141.992370 
 127.209556 35.779778 144.828224 
 127.209667 35.779778 147.951956 
 127.209778 35.779778 151.359818 
 127.208667 35.779889 130.144247 
 127.208778 35.779889 130.900106 
 127.208889 35.779889 131.932547 
 127.209000 35.779889 133.244335 
 127.209222 35.779889 136.706849 
 127.209444 35.779889 141.296810 
 127.209556 35.779889 144.016327 
 127.209667 35.779889 147.023390 
 127.209778 35.779889 150.314435 
 127.208667 35.780000 130.312141 
 127.208778 35.780000 130.953119 
 127.208889 35.780000 131.870540 
 127.209000 35.780000 133.066986 
 127.209222 35.780000 136.298209 
 127.209444 35.780000 140.655939 
 127.209556 35.780000 143.259031 
 127.209667 35.780000 146.149338 
 127.209778 35.780000 149.323478 
 127.208778 35.780000 130.953119 
 127.208889 35.780000 131.870540 
 127.209000 35.780000 133.066986 
 127.209111 35.780000 134.541723 
 127.209333 35.780000 138.334835 
 127.209556 35.780000 143.259031 
 127.209667 35.780000 146.149338 
 127.209778 35.780000 149.323478 
 127.209889 35.780000 152.787577 
 127.208778 35.780111 131.061234 
 127.208889 35.780111 131.863742 
 127.209000 35.780111 132.944954 
 127.209111 35.780111 134.304316 
 127.209333 35.780111 137.865888 
 127.209556 35.780111 142.557601 
 127.209667 35.780111 145.331265 
 127.209778 35.780111 148.388613 
 127.209889 35.780111 151.735588 
 127.208778 35.780222 131.224931 
 127.208889 35.780222 131.912236 
 127.209000 35.780222 132.877924 
 127.209111 35.780222 134.121623 
 127.209333 35.780222 137.451077 
 127.209556 35.780222 141.909730 
 127.209667 35.780222 144.566462 
 127.209778 35.780222 147.506729 
 127.209889 35.780222 150.736291 
 127.208889 35.780222 131.912236 
 127.209000 35.780222 132.877924 
 127.209111 35.780222 134.121623 
 127.209222 35.780222 135.646423 
 127.209444 35.780222 139.539556 
 127.209667 35.780222 144.566462 
 127.209778 35.780222 147.506729 
 127.209889 35.780222 150.736291 
 127.210000 35.780222 154.251229 
 127.208889 35.780333 132.015963 
 127.209000 35.780333 132.866236 
 127.209111 35.780333 133.994378 
 127.209222 35.780333 135.403300 
 127.209444 35.780333 139.064066 
 127.209667 35.780333 143.857660 
 127.209778 35.780333 146.680960 
 127.209889 35.780333 149.793223 
 127.210000 35.780333 153.190712 
 127.208889 35.780444 132.175387 
 127.209000 35.780444 132.909954 
 127.209111 35.780444 133.922251 
 127.209222 35.780444 135.215005 
 127.209444 35.780444 138.642822 
 127.209667 35.780444 143.202525 
 127.209778 35.780444 145.908569 
 127.209889 35.780444 148.903242 
 127.210000 35.780444 152.182994 
 127.209000 35.780444 132.909954 
 127.209111 35.780444 133.922251 
 127.209222 35.780444 135.215005 
 127.209333 35.780444 136.787326 
 127.209556 35.780444 140.779724 
 127.209778 35.780444 145.908569 
 127.209889 35.780444 148.903242 
 127.210000 35.780444 152.182994 
 127.210111 35.780444 155.754111 
 127.209000 35.780555 133.009036 
 127.209111 35.780555 133.905595 
 127.209222 35.780555 135.082289 
 127.209333 35.780555 136.538409 
 127.209556 35.780555 140.297611 
 127.209778 35.780555 145.192314 
 127.209889 35.780555 148.069512 
 127.210000 35.780555 151.231640 
 127.210111 35.780555 154.684800 
 127.209000 35.780667 133.163930 
 127.209111 35.780667 133.944460 
 127.209222 35.780667 135.004803 
 127.209333 35.780667 136.344432 
 127.209556 35.780667 139.869856 
 127.209778 35.780667 144.529835 
 127.209889 35.780667 147.289267 
 127.210000 35.780667 150.333480 
 127.210111 35.780667 153.668391 
 127.209111 35.780667 133.944460 
 127.209222 35.780667 135.004803 
 127.209333 35.780667 136.344432 
 127.209444 35.780667 137.966584 
 127.209667 35.780667 142.058370 
 127.209889 35.780667 147.289267 
 127.210000 35.780667 150.333480 
 127.210111 35.780667 153.668391 
 127.210222 35.780667 157.289914 
 127.209111 35.780778 134.039029 
 127.209222 35.780778 134.982930 
 127.209333 35.780778 136.205975 
 127.209444 35.780778 137.711220 
 127.209667 35.780778 141.568576 
 127.209889 35.780778 146.564093 
 127.210000 35.780778 149.490304 
 127.210111 35.780778 152.706879 
 127.210222 35.780778 156.209915 
 127.209111 35.780889 134.189104 
 127.209222 35.780889 135.016670 
 127.209333 35.780889 136.123242 
 127.209444 35.780889 137.511689 
 127.209667 35.780889 141.134837 
 127.209889 35.780889 145.895201 
 127.210000 35.780889 148.703524 
 127.210111 35.780889 151.801877 
 127.210222 35.780889 155.186542 
 127.209222 35.780889 135.016670 
 127.209333 35.780889 136.123242 
 127.209444 35.780889 137.511689 
 127.209556 35.780889 139.180969 
 127.209778 35.780889 143.371366 
 127.210000 35.780889 148.703524 
 127.210111 35.780889 151.801877 
 127.210222 35.780889 155.186542 
 127.210333 35.780889 158.863968 
 127.209222 35.781000 135.106246 
 127.209333 35.781000 136.096052 
 127.209444 35.781000 137.367409 
 127.209556 35.781000 138.919457 
 127.209778 35.781000 142.874591 
 127.210000 35.781000 147.970534 
 127.210111 35.781000 150.950374 
 127.210222 35.781000 154.216377 
 127.210333 35.781000 157.774804 
 127.209222 35.781111 135.251458 
 127.209333 35.781111 136.124606 
 127.209444 35.781111 137.278983 
 127.209556 35.781111 138.713909 
 127.209778 35.781111 142.434004 
 127.210000 35.781111 147.293960 
 127.210111 35.781111 150.155401 
 127.210222 35.781111 153.302856 
 127.210333 35.781111 156.742402 
 127.209333 35.781111 136.124606 
 127.209444 35.781111 137.278983 
 127.209556 35.781111 138.713909 
 127.209667 35.781111 140.432770 
 127.209889 35.781111 144.721885 
 127.210111 35.781111 150.155401 
 127.210222 35.781111 153.302856 
 127.210333 35.781111 156.742402 
 127.210444 35.781111 160.469782 
 127.209333 35.781222 136.209109 
 127.209444 35.781222 137.246212 
 127.209556 35.781222 138.563724 
 127.209667 35.781222 140.164844 
 127.209889 35.781222 144.217860 
 127.210111 35.781222 149.414325 
 127.210222 35.781222 152.442941 
 127.210333 35.781222 155.763312 
 127.210444 35.781222 159.371366 
 127.209333 35.781333 136.349376 
 127.209444 35.781333 137.269315 
 127.209556 35.781333 138.469523 
 127.209667 35.781333 139.953013 
 127.209889 35.781333 143.770156 
 127.210111 35.781333 148.729798 
 127.210222 35.781333 151.639690 
 127.210333 35.781333 154.841002 
 127.210444 35.781333 158.329849 
 127.209333 35.781444 136.545997 
 127.209444 35.781444 137.348478 
 127.209556 35.781444 138.431087 
 127.209667 35.781444 139.796654 
 127.209889 35.781444 143.377336 
 127.210111 35.781444 148.099568 
 127.210222 35.781444 150.890442 
 127.210333 35.781444 153.972401 
 127.210444 35.781444 157.341747 
 127.209444 35.781444 137.348478 
 127.209556 35.781444 138.431087 
 127.209667 35.781444 139.796654 
 127.209778 35.781444 141.444165 
 127.210000 35.781444 145.594267 
 127.210222 35.781444 150.890442 
 127.210333 35.781444 153.972401 
 127.210444 35.781444 157.341747 
 127.210556 35.781444 161.004898 
 127.209444 35.781555 137.483534 
 127.209556 35.781555 138.448656 
 127.209667 35.781555 139.696409 
 127.209778 35.781555 141.225966 
 127.210000 35.781555 145.139361 
 127.210222 35.781555 150.197876 
 127.210333 35.781555 153.160599 
 127.210444 35.781555 156.410560 
 127.210556 35.781555 159.953989 
 127.209444 35.781667 137.675056 
 127.209556 35.781667 138.522395 
 127.209667 35.781667 139.652041 
 127.209778 35.781667 141.063349 
 127.210000 35.781667 144.739445 
 127.210222 35.781667 149.559712 
 127.210333 35.781667 152.402904 
 127.210444 35.781667 155.533186 
 127.210556 35.781667 158.956600 
 127.209556 35.781667 138.522395 
 127.209667 35.781667 139.652041 
 127.209778 35.781667 141.063349 
 127.209889 35.781667 142.759661 
 127.210111 35.781667 147.006938 
 127.210333 35.781667 152.402904 
 127.210444 35.781667 155.533186 
 127.210556 35.781667 158.956600 
 127.210667 35.781667 162.668911 
 127.209556 35.781778 138.652429 
 127.209667 35.781778 139.663874 
 127.209778 35.781778 140.956841 
 127.209889 35.781778 142.534485 
 127.210111 35.781778 146.543808 
 127.210333 35.781778 151.700867 
 127.210444 35.781778 154.711380 
 127.210556 35.781778 158.014690 
 127.210667 35.781778 161.606746 
 127.209556 35.781889 138.838495 
 127.209667 35.781889 139.731851 
 127.209778 35.781889 140.906588 
 127.209889 35.781889 142.365675 
 127.210111 35.781889 146.137272 
 127.210333 35.781889 151.055653 
 127.210444 35.781889 153.946515 
 127.210556 35.781889 157.129837 
 127.210667 35.781889 160.601758 
 127.209667 35.781889 139.731851 
 127.209778 35.781889 140.906588 
 127.209889 35.781889 142.365675 
 127.210000 35.781889 144.107950 
 127.210222 35.781889 148.451587 
 127.210444 35.781889 153.946515 
 127.210556 35.781889 157.129837 
 127.210667 35.781889 160.601758 
 127.210778 35.781889 164.368853 
 127.209667 35.782000 139.856310 
 127.209778 35.782000 140.912522 
 127.209889 35.782000 142.252757 
 127.210000 35.782000 143.876037 
 127.210222 35.782000 147.980882 
 127.210444 35.782000 153.236061 
 127.210556 35.782000 156.299100 
 127.210667 35.782000 159.650589 
 127.210778 35.782000 163.296915 
 127.209667 35.782111 140.036930 
 127.209778 35.782111 140.974728 
 127.209889 35.782111 142.196222 
 127.210000 35.782111 143.700622 
 127.210222 35.782111 147.566902 
 127.210444 35.782111 152.582565 
 127.210556 35.782111 155.525438 
 127.210667 35.782111 158.756613 
 127.210778 35.782111 162.282287 
 127.209778 35.782111 140.974728 
 127.209889 35.782111 142.196222 
 127.210000 35.782111 143.700622 
 127.210111 35.782111 145.491409 
 127.210333 35.782111 149.931481 
 127.210556 35.782111 155.525438 
 127.210667 35.782111 158.756613 
 127.210778 35.782111 162.282287 
 127.210889 35.782111 166.098060 
 127.209778 35.782222 141.093526 
 127.209889 35.782222 142.195983 
 127.210000 35.782222 143.581204 
 127.210111 35.782222 145.252485 
 127.210333 35.782222 149.452924 
 127.210556 35.782222 154.806290 
 127.210667 35.782222 157.916855 
 127.210778 35.782222 161.321581 
 127.210889 35.782222 165.016257 
 127.209778 35.782333 141.268614 
 127.209889 35.782333 142.252145 
 127.210000 35.782333 143.518300 
 127.210111 35.782333 145.070187 
 127.210333 35.782333 149.031223 
 127.210556 35.782333 154.144232 
 127.210667 35.782333 157.134305 
 127.210778 35.782333 160.418202 
 127.210889 35.782333 163.991899 
 127.209889 35.782333 142.252145 
 127.210000 35.782333 143.518300 
 127.210111 35.782333 145.070187 
 127.210222 35.782333 146.906493 
 127.210444 35.782333 151.442167 
 127.210667 35.782333 157.134305 
 127.210778 35.782333 160.418202 
 127.210889 35.782333 163.991899 
 127.211000 35.782333 167.862129 
 127.209889 35.782444 142.365007 
 127.210000 35.782444 143.511799 
 127.210111 35.782444 144.943994 
 127.210222 35.782444 146.660467 
 127.210444 35.782444 150.955667 
 127.210667 35.782444 156.406372 
 127.210778 35.782444 159.569142 
 127.210889 35.782444 163.021565 
 127.211000 35.782444 166.770179 
 127.209889 35.782556 142.534628 
 127.210000 35.782556 143.561963 
 127.210111 35.782556 144.874374 
 127.210222 35.782556 146.470921 
 127.210444 35.782556 150.525464 
 127.210667 35.782556 155.734556 
 127.210778 35.782556 158.776109 
 127.210889 35.782556 162.107167 
 127.211000 35.782556 165.734078 
 127.210000 35.782556 143.561963 
 127.210111 35.782556 144.874374 
 127.210222 35.782556 146.470921 
 127.210333 35.782556 148.355229 
 127.210556 35.782556 152.986152 
 127.210778 35.782556 158.776109 
 127.210889 35.782556 162.107167 
 127.211000 35.782556 165.734078 
 127.211111 35.782556 169.652279 
 127.210000 35.782667 143.668665 
 127.210111 35.782667 144.861405 
 127.210222 35.782667 146.338140 
 127.210333 35.782667 148.102307 
 127.210556 35.782667 152.492327 
 127.210778 35.782667 158.040425 
 127.210889 35.782667 161.250237 
 127.211000 35.782667 164.755564 
 127.211111 35.782667 168.552032 
 127.210000 35.782778 143.832378 
 127.210111 35.782778 144.905148 
 127.210222 35.782778 146.261773 
 127.210333 35.782778 147.905498 
 127.210556 35.782778 152.054019 
 127.210778 35.782778 157.359659 
 127.210889 35.782778 160.447928 
 127.211000 35.782778 163.831372 
 127.211111 35.782778 167.505809 
 127.210000 35.782889 144.052645 
 127.210111 35.782889 145.005557 
 127.210222 35.782889 146.242185 
 127.210333 35.782889 147.765585 
 127.210556 35.782889 151.672838 
 127.210778 35.782889 156.736255 
 127.210889 35.782889 159.703100 
 127.211000 35.782889 162.964782 
 127.211111 35.782889 166.517308 
 127.210111 35.782889 145.005557 
 127.210222 35.782889 146.242185 
 127.210333 35.782889 147.765585 
 127.210444 35.782889 149.574484 
 127.210667 35.782889 154.058475 
 127.210889 35.782889 159.703100 
 127.211000 35.782889 162.964782 
 127.211111 35.782889 166.517308 
 127.211222 35.782889 170.367371 
 127.210111 35.783000 145.163084 
 127.210222 35.783000 146.279416 
 127.210333 35.783000 147.682190 
 127.210444 35.783000 149.370322 
 127.210667 35.783000 153.611970 
 127.210889 35.783000 159.013292 
 127.211000 35.783000 162.152912 
 127.211111 35.783000 165.583228 
 127.211222 35.783000 169.310741 
 127.210111 35.783111 145.377293 
 127.210222 35.783111 146.373441 
 127.210333 35.783111 147.655704 
 127.210444 35.783111 149.223183 
 127.210667 35.783111 153.222722 
 127.210889 35.783111 158.380978 
 127.211000 35.783111 161.398656 
 127.211111 35.783111 164.706883 
 127.211222 35.783111 168.311966 
 127.210222 35.783111 146.373441 
 127.210333 35.783111 147.655704 
 127.210444 35.783111 149.223183 
 127.210556 35.783111 151.079454 
 127.210778 35.783111 155.657463 
 127.211000 35.783111 161.398656 
 127.211111 35.783111 164.706883 
 127.211222 35.783111 168.311966 
 127.211333 35.783111 172.209373 
 127.210222 35.783222 146.524690 
 127.210333 35.783222 147.686140 
 127.210444 35.783222 149.132668 
 127.210556 35.783222 150.867655 
 127.210778 35.783222 155.202476 
 127.211000 35.783222 160.699521 
 127.211111 35.783222 163.885358 
 127.211222 35.783222 167.367713 
 127.211333 35.783222 171.142241 
 127.210222 35.783333 146.732748 
 127.210333 35.783333 147.773500 
 127.210444 35.783333 149.099190 
 127.210556 35.783333 150.713009 
 127.210778 35.783333 154.804877 
 127.211000 35.783333 160.058012 
 127.211111 35.783333 163.121580 
 127.211222 35.783333 166.481327 
 127.211333 35.783333 170.133099 
 127.210333 35.783333 147.773500 
 127.210444 35.783333 149.099190 
 127.210556 35.783333 150.713009 
 127.210667 35.783333 152.613540 
 127.210889 35.783333 157.284700 
 127.211111 35.783333 163.121580 
 127.211222 35.783333 166.481327 
 127.211333 35.783333 170.133099 
 127.211444 35.783333 174.083743 
 127.210333 35.783444 147.918189 
 127.210444 35.783444 149.122740 
 127.210556 35.783444 150.615089 
 127.210667 35.783444 152.394009 
 127.210889 35.783444 156.821137 
 127.211111 35.783444 162.413023 
 127.211222 35.783444 165.649860 
 127.211333 35.783444 169.178576 
 127.211444 35.783444 173.005822 
 127.210333 35.783556 148.120210 
 127.210444 35.783556 149.203529 
 127.210556 35.783556 150.574316 
 127.210667 35.783556 152.231532 
 127.210889 35.783556 156.414443 
 127.211111 35.783556 161.761153 
 127.211222 35.783556 164.874991 
 127.211333 35.783556 168.280560 
 127.211444 35.783556 171.984317 
 127.210444 35.783556 149.203529 
 127.210556 35.783556 150.574316 
 127.210667 35.783556 152.231532 
 127.210778 35.783556 154.178888 
 127.211000 35.783556 158.942815 
 127.211222 35.783556 164.874991 
 127.211333 35.783556 168.280560 
 127.211444 35.783556 171.984317 
 127.211556 35.783556 175.984822 
 127.210444 35.783667 149.341375 
 127.210556 35.783667 150.590715 
 127.210667 35.783667 152.126344 
 127.210778 35.783667 153.951781 
 127.211000 35.783667 158.471250 
 127.211222 35.783667 164.158006 
 127.211333 35.783667 167.440551 
 127.211444 35.783667 171.020943 
 127.211556 35.783667 174.897837 
 127.210444 35.783778 149.536858 
 127.210556 35.783778 150.664449 
 127.210667 35.783778 152.078188 
 127.210778 35.783778 153.781403 
 127.211000 35.783778 158.055809 
 127.211222 35.783778 163.496542 
 127.211333 35.783778 166.655760 
 127.211444 35.783778 170.112484 
 127.211556 35.783778 173.865466 
 127.210556 35.783778 150.664449 
 127.210667 35.783778 152.078188 
 127.210778 35.783778 153.781403 
 127.210889 35.783778 155.772532 
 127.211111 35.783778 160.628763 
 127.211333 35.783778 166.655760 
 127.211444 35.783778 170.112484 
 127.211556 35.783778 173.865466 
 127.211667 35.783778 177.912526 
 127.210556 35.783889 150.795367 
 127.210667 35.783889 152.087333 
 127.210778 35.783889 153.668444 
 127.210889 35.783889 155.537327 
 127.211111 35.783889 160.148255 
 127.211333 35.783889 165.928986 
 127.211444 35.783889 169.262165 
 127.211556 35.783889 172.891358 
 127.211667 35.783889 176.814480 
 127.210556 35.784000 150.984026 
 127.210667 35.784000 152.153916 
 127.210778 35.784000 153.612618 
 127.210889 35.784000 155.358952 
 127.211111 35.784000 159.723970 
 127.211333 35.784000 165.257830 
 127.211444 35.784000 168.467162 
 127.211556 35.784000 171.972262 
 127.211667 35.784000 175.771145 
 127.210556 35.784111 151.229882 
 127.210667 35.784111 152.277811 
 127.210778 35.784111 153.614222 
 127.210889 35.784111 155.238125 
 127.211111 35.784111 159.357472 
 127.211333 35.784111 164.644702 
 127.211444 35.784111 167.730308 
 127.211556 35.784111 171.111440 
 127.211667 35.784111 174.786207 
 127.210667 35.784111 152.277811 
 127.210778 35.784111 153.614222 
 127.210889 35.784111 155.238125 
 127.211000 35.784111 157.153174 
 127.211222 35.784111 161.855584 
 127.211444 35.784111 167.730308 
 127.211556 35.784111 171.111440 
 127.211667 35.784111 174.786207 
 127.211778 35.784111 178.761483 
 127.210667 35.784222 152.459549 
 127.210778 35.784222 153.673365 
 127.210889 35.784222 155.174533 
 127.211000 35.784222 156.966513 
 127.211222 35.784222 161.422167 
 127.211444 35.784222 167.049171 
 127.211556 35.784222 170.306030 
 127.211667 35.784222 173.856377 
 127.211778 35.784222 177.706891 
 127.210667 35.784333 152.699072 
 127.210778 35.784333 153.790198 
 127.210889 35.784333 155.168538 
 127.211000 35.784333 156.837356 
 127.211222 35.784333 161.046068 
 127.211444 35.784333 166.425170 
 127.211556 35.784333 169.557665 
 127.211667 35.784333 172.983503 
 127.211778 35.784333 176.709165 
 127.210778 35.784333 153.790198 
 127.210889 35.784333 155.168538 
 127.211000 35.784333 156.837356 
 127.211111 35.784333 158.795141 
 127.211333 35.784333 163.587713 
 127.211556 35.784333 169.557665 
 127.211667 35.784333 172.983503 
 127.211778 35.784333 176.709165 
 127.211889 35.784333 180.729916 
 127.210778 35.784444 153.964477 
 127.210889 35.784444 155.220105 
 127.211000 35.784444 156.765880 
 127.211111 35.784444 158.600482 
 127.211333 35.784444 163.145874 
 127.211556 35.784444 168.867587 
 127.211667 35.784444 172.169039 
 127.211778 35.784444 175.769973 
 127.211889 35.784444 179.665850 
 127.210778 35.784556 154.196906 
 127.210889 35.784556 155.329517 
 127.211000 35.784556 156.751944 
 127.211111 35.784556 158.463056 
 127.211333 35.784556 162.760659 
 127.211556 35.784556 168.233522 
 127.211667 35.784556 171.410284 
 127.211778 35.784556 174.886186 
 127.211889 35.784556 178.656884 
 127.210889 35.784556 155.329517 
 127.211000 35.784556 156.751944 
 127.211111 35.784556 158.463056 
 127.211222 35.784556 160.466641 
 127.211444 35.784556 165.349813 
 127.211667 35.784556 171.410284 
 127.211778 35.784556 174.886186 
 127.211889 35.784556 178.656884 
 127.212000 35.784556 182.729398 
 127.210889 35.784667 155.496502 
 127.211000 35.784667 156.795698 
 127.211111 35.784667 158.383440 
 127.211222 35.784667 160.263321 
 127.211444 35.784667 164.898466 
 127.211667 35.784667 170.709948 
 127.211778 35.784667 174.060942 
 127.211889 35.784667 177.706586 
 127.212000 35.784667 181.653703 
 127.210889 35.784778 155.721737 
 127.211000 35.784778 156.897396 
 127.211111 35.784778 158.361463 
 127.211222 35.784778 160.117334 
 127.211444 35.784778 164.503841 
 127.211667 35.784778 170.065721 
 127.211778 35.784778 173.291503 
 127.211889 35.784778 176.811788 
 127.212000 35.784778 180.633201 
 127.211000 35.784778 156.897396 
 127.211111 35.784778 158.361463 
 127.211222 35.784778 160.117334 
 127.211333 35.784778 162.163357 
 127.211556 35.784778 167.138399 
 127.211778 35.784778 173.291503 
 127.211889 35.784778 176.811788 
 127.212000 35.784778 180.633201 
 127.212111 35.784778 184.750856 
 127.211000 35.784889 157.056795 
 127.211111 35.784889 158.397305 
 127.211222 35.784889 160.029286 
 127.211333 35.784889 161.951278 
 127.211556 35.784889 166.677348 
 127.211778 35.784889 172.580614 
 127.211889 35.784889 175.975665 
 127.212000 35.784889 179.671502 
 127.212111 35.784889 183.663433 
 127.211000 35.785000 157.274545 
 127.211111 35.785000 158.491191 
 127.211222 35.785000 159.998976 
 127.211333 35.785000 161.796631 
 127.211556 35.785000 166.273116 
 127.211778 35.785000 171.925931 
 127.211889 35.785000 175.195442 
 127.212000 35.785000 178.765396 
 127.212111 35.785000 182.631298 
 127.211111 35.785000 158.491191 
 127.211222 35.785000 159.998976 
 127.211333 35.785000 161.796631 
 127.211444 35.785000 163.888076 
 127.211667 35.785000 168.950634 
 127.211889 35.785000 175.195442 
 127.212000 35.785000 178.765396 
 127.212111 35.785000 182.631298 
 127.212222 35.785000 186.800313 
 127.211111 35.785111 158.643216 
 127.211222 35.785111 160.026709 
 127.211333 35.785111 161.699934 
 127.211444 35.785111 163.666614 
 127.211667 35.785111 168.479019 
 127.211889 35.785111 174.472709 
 127.212000 35.785111 177.916690 
 127.212111 35.785111 181.656472 
 127.212222 35.785111 185.699023 
 127.211111 35.785222 158.853070 
 127.211222 35.785222 160.112392 
 127.211333 35.785222 161.661308 
 127.211444 35.785222 163.503343 
 127.211667 35.785222 168.065841 
 127.211889 35.785222 173.808661 
 127.212000 35.785222 177.126795 
 127.212111 35.785222 180.740585 
 127.212222 35.785222 184.656800 
 127.211111 35.785333 159.121581 
 127.211222 35.785333 160.256423 
 127.211333 35.785333 161.680722 
 127.211444 35.785333 163.397804 
 127.211667 35.785333 167.709780 
 127.211889 35.785333 173.201116 
 127.212000 35.785333 176.393095 
 127.212111 35.785333 179.880586 
 127.212222 35.785333 183.670156 
 127.211222 35.785333 160.256423 
 127.211333 35.785333 161.680722 
 127.211444 35.785333 163.397804 
 127.211556 35.785333 165.407765 
 127.211778 35.785333 170.308556 
 127.212000 35.785333 176.393095 
 127.212111 35.785333 179.880586 
 127.212222 35.785333 183.670156 
 127.212333 35.785333 187.756965 
 127.211222 35.785444 160.458412 
 127.211333 35.785444 161.758212 
 127.211444 35.785444 163.350464 
 127.211556 35.785444 165.235356 
 127.211778 35.785444 169.885392 
 127.212000 35.785444 175.718213 
 127.212111 35.785444 179.079530 
 127.212222 35.785444 182.742585 
 127.212333 35.785444 186.702731 
 127.211222 35.785556 160.719156 
 127.211333 35.785556 161.894151 
 127.211444 35.785556 163.361262 
 127.211556 35.785556 165.120777 
 127.211778 35.785556 169.519441 
 127.212000 35.785556 175.099927 
 127.212111 35.785556 178.334763 
 127.212222 35.785556 181.870993 
 127.212333 35.785556 185.704170 
 127.211333 35.785556 161.894151 
 127.211444 35.785556 163.361262 
 127.211556 35.785556 165.120777 
 127.211667 35.785556 167.172066 
 127.211889 35.785556 172.160315 
 127.212111 35.785556 178.334763 
 127.212222 35.785556 181.870993 
 127.212333 35.785556 185.704170 
 127.212444 35.785556 189.841401 
 127.211333 35.785667 162.088172 
 127.211444 35.785667 163.430265 
 127.211556 35.785667 165.064525 
 127.211667 35.785667 166.990419 
 127.211889 35.785667 171.727064 
 127.212111 35.785667 177.648945 
 127.212222 35.785667 181.058478 
 127.212333 35.785667 184.764813 
 127.212444 35.785667 188.774859 
 127.211333 35.785778 162.341048 
 127.211444 35.785778 163.557813 
 127.211556 35.785778 165.066508 
 127.211667 35.785778 166.866698 
 127.211889 35.785778 171.351121 
 127.212111 35.785778 177.019818 
 127.212222 35.785778 180.302345 
 127.212333 35.785778 183.881530 
 127.212444 35.785778 187.764080 
 127.211444 35.785778 163.557813 
 127.211556 35.785778 165.066508 
 127.211667 35.785778 166.866698 
 127.211778 35.785778 168.962301 
 127.212000 35.785778 174.038000 
 127.212222 35.785778 180.302345 
 127.212333 35.785778 183.881530 
 127.212444 35.785778 187.764080 
 127.212556 35.785778 191.945004 
 127.211444 35.785889 163.743571 
 127.211556 35.785889 165.126823 
 127.211667 35.785889 166.801432 
 127.211778 35.785889 168.771118 
 127.212000 35.785889 173.594364 
 127.212222 35.785889 179.605293 
 127.212333 35.785889 183.057455 
 127.212444 35.785889 186.812640 
 127.212556 35.785889 190.866052 
 127.211444 35.786000 163.988281 
 127.211556 35.786000 165.245780 
 127.211667 35.786000 166.794499 
 127.211778 35.786000 168.637957 
 127.212000 35.786000 173.208131 
 127.212222 35.786000 178.965024 
 127.212333 35.786000 182.289855 
 127.212444 35.786000 185.917364 
 127.212556 35.786000 189.842956 
 127.211556 35.786000 165.245780 
 127.211667 35.786000 166.794499 
 127.211778 35.786000 168.637957 
 127.211889 35.786000 170.774354 
 127.212111 35.786000 175.936564 
 127.212333 35.786000 182.289855 
 127.212444 35.786000 185.917364 
 127.212556 35.786000 189.842956 
 127.212667 35.786000 194.073882 
 127.211556 35.786111 165.423430 
 127.211667 35.786111 166.846163 
 127.211778 35.786111 168.563300 
 127.211889 35.786111 170.573237 
 127.212111 35.786111 175.481711 
 127.212333 35.786111 181.580299 
 127.212444 35.786111 185.080041 
 127.212556 35.786111 188.877723 
 127.212667 35.786111 192.980392 
 127.211556 35.786222 165.659419 
 127.211667 35.786222 166.956289 
 127.211778 35.786222 168.547229 
 127.211889 35.786222 170.430830 
 127.212111 35.786222 175.085817 
 127.212333 35.786222 180.929957 
 127.212444 35.786222 184.302062 
 127.212556 35.786222 187.971963 
 127.212667 35.786222 191.946506 
 127.211667 35.786222 166.956289 
 127.211778 35.786222 168.547229 
 127.211889 35.786222 170.430830 
 127.212000 35.786222 172.611136 
 127.212222 35.786222 177.859844 
 127.212444 35.786222 184.302062 
 127.212556 35.786222 187.971963 
 127.212667 35.786222 191.946506 
 127.212778 35.786222 196.220551 
 127.211667 35.786333 167.125359 
 127.211778 35.786333 168.589789 
 127.211889 35.786333 170.346744 
 127.212000 35.786333 172.400065 
 127.212222 35.786333 177.394185 
 127.212444 35.786333 183.580850 
 127.212556 35.786333 187.122659 
 127.212667 35.786333 190.968766 
 127.212778 35.786333 195.114230 
 127.211667 35.786444 167.352894 
 127.211778 35.786444 168.690938 
 127.211889 35.786444 170.321370 
 127.212000 35.786444 172.247832 
 127.212222 35.786444 176.987617 
 127.212444 35.786444 182.918984 
 127.212556 35.786444 186.332832 
 127.212667 35.786444 190.050633 
 127.212778 35.786444 194.067646 
 127.211667 35.786556 167.639780 
 127.211778 35.786556 168.851127 
 127.211889 35.786556 170.354724 
 127.212000 35.786556 172.154015 
 127.212222 35.786556 176.638841 
 127.212444 35.786556 182.314288 
 127.212556 35.786556 185.599863 
 127.212667 35.786556 189.189046 
 127.212778 35.786556 193.077299 
 127.211778 35.786556 168.851127 
 127.211889 35.786556 170.354724 
 127.212000 35.786556 172.154015 
 127.212111 35.786556 174.247264 
 127.212333 35.786556 179.326082 
 127.212556 35.786556 185.599863 
 127.212667 35.786556 189.189046 
 127.212778 35.786556 193.077299 
 127.212889 35.786556 197.271808 
 127.211778 35.786667 169.069907 
 127.211889 35.786667 170.446793 
 127.212000 35.786667 172.119038 
 127.212111 35.786667 174.085103 
 127.212333 35.786667 178.908737 
 127.212556 35.786667 184.926372 
 127.212667 35.786667 188.387068 
 127.212778 35.786667 192.146691 
 127.212889 35.786667 196.212225 
 127.211778 35.786778 169.348134 
 127.211889 35.786778 170.597997 
 127.212000 35.786778 172.142883 
 127.212111 35.786778 173.981452 
 127.212333 35.786778 178.549277 
 127.212556 35.786778 184.310142 
 127.212667 35.786778 187.642040 
 127.212778 35.786778 191.272721 
 127.212889 35.786778 195.208967 
 127.211889 35.786778 170.597997 
 127.212000 35.786778 172.142883 
 127.212111 35.786778 173.981452 
 127.212222 35.786778 176.117672 
 127.212444 35.786778 181.281167 
 127.212667 35.786778 187.642040 
 127.212778 35.786778 191.272721 
 127.212889 35.786778 195.208967 
 127.213000 35.786778 199.445693 
 127.211889 35.786889 170.808332 
 127.212000 35.786889 172.225764 
 127.212111 35.786889 173.936743 
 127.212222 35.786889 175.945035 
 127.212444 35.786889 180.852056 
 127.212667 35.786889 186.955491 
 127.212778 35.786889 190.457141 
 127.212889 35.786889 194.264009 
 127.213000 35.786889 198.371214 
 127.211889 35.787000 171.077386 
 127.212000 35.787000 172.367489 
 127.212111 35.787000 173.951003 
 127.212222 35.787000 175.831493 
 127.212444 35.787000 180.482296 
 127.212667 35.787000 186.328553 
 127.212778 35.787000 189.701302 
 127.212889 35.787000 193.378925 
 127.213000 35.787000 197.356741 
 127.212000 35.787000 172.367489 
 127.212111 35.787000 173.951003 
 127.212222 35.787000 175.831493 
 127.212333 35.787000 178.007092 
 127.212556 35.787000 183.254306 
 127.212778 35.787000 189.701302 
 127.212889 35.787000 193.378925 
 127.213000 35.787000 197.356741 
 127.213111 35.787000 201.642074 
 127.212000 35.787111 172.568648 
 127.212111 35.787111 174.024384 
 127.212222 35.787111 175.776758 
 127.212333 35.787111 177.824105 
 127.212556 35.787111 182.813995 
 127.212778 35.787111 189.002703 
 127.212889 35.787111 192.550768 
 127.213000 35.787111 196.398883 
 127.213111 35.787111 200.554168 
 127.212000 35.787222 172.828652 
 127.212111 35.787222 174.156735 
 127.212222 35.787222 175.781121 
 127.212333 35.787222 177.700342 
 127.212556 35.787222 182.433166 
 127.212778 35.787222 188.363847 
 127.212889 35.787222 191.782485 
 127.213000 35.787222 195.501032 
 127.213111 35.787222 199.526402 
 127.212111 35.787222 174.156735 
 127.212222 35.787222 175.781121 
 127.212333 35.787222 177.700342 
 127.212444 35.787222 179.918489 
 127.212667 35.787222 185.249396 
 127.212889 35.787222 191.782485 
 127.213000 35.787222 195.501032 
 127.213111 35.787222 199.526402 
 127.213222 35.787222 203.853369 
 127.212111 35.787333 174.348614 
 127.212222 35.787333 175.844697 
 127.212333 35.787333 177.635478 
 127.212444 35.787333 179.724847 
 127.212667 35.787333 184.797581 
 127.212889 35.787333 191.071532 
 127.213000 35.787333 194.660197 
 127.213111 35.787333 198.555340 
 127.213222 35.787333 202.751936 
 127.212111 35.787444 174.599465 
 127.212222 35.787444 175.967370 
 127.212333 35.787444 177.629839 
 127.212444 35.787444 179.590558 
 127.212667 35.787444 184.405377 
 127.212889 35.787444 190.420453 
 127.213000 35.787444 193.879369 
 127.213111 35.787444 197.644418 
 127.213222 35.787444 201.710777 
 127.212222 35.787444 175.967370 
 127.212333 35.787444 177.629839 
 127.212444 35.787444 179.590558 
 127.212556 35.787444 181.847531 
 127.212778 35.787444 187.261165 
 127.213000 35.787444 193.879369 
 127.213111 35.787444 197.644418 
 127.213222 35.787444 201.710777 
 127.213333 35.787444 206.085906 
 127.212222 35.787556 176.149666 
 127.212333 35.787556 177.683507 
 127.212444 35.787556 179.515261 
 127.212556 35.787556 181.643132 
 127.212778 35.787556 186.797742 
 127.213000 35.787556 193.155960 
 127.213111 35.787556 196.790600 
 127.213222 35.787556 200.726410 
 127.213333 35.787556 204.970641 
 127.212222 35.787667 176.391059 
 127.212333 35.787667 177.796400 
 127.212444 35.787667 179.499316 
 127.212556 35.787667 181.498214 
 127.212778 35.787667 186.394062 
 127.213000 35.787667 192.492557 
 127.213111 35.787667 195.996922 
 127.213222 35.787667 199.802316 
 127.213333 35.787667 203.915784 
 127.212222 35.787778 176.692484 
 127.212333 35.787778 177.969008 
 127.212444 35.787778 179.542771 
 127.212556 35.787778 181.412380 
 127.212778 35.787778 186.048834 
 127.213000 35.787778 191.886976 
 127.213111 35.787778 195.260752 
 127.213222 35.787778 198.935414 
 127.213333 35.787778 202.917806 
 127.212333 35.787778 177.969008 
 127.212444 35.787778 179.542771 
 127.212556 35.787778 181.412380 
 127.212667 35.787778 183.581843 
 127.212889 35.787778 188.818301 
 127.213111 35.787778 195.260752 
 127.213222 35.787778 198.935414 
 127.213333 35.787778 202.917806 
 127.213444 35.787778 207.202761 
 127.212333 35.787889 178.201290 
 127.212444 35.787889 179.645806 
 127.212556 35.787889 181.386032 
 127.212667 35.787889 183.425773 
 127.212889 35.787889 188.402174 
 127.213111 35.787889 194.583606 
 127.213222 35.787889 198.127447 
 127.213333 35.787889 201.978672 
 127.213444 35.787889 206.132317 
 127.212333 35.788000 178.492796 
 127.212444 35.788000 179.808191 
 127.212556 35.788000 181.419164 
 127.212667 35.788000 183.329313 
 127.212889 35.788000 188.045918 
 127.213111 35.788000 193.966597 
 127.213222 35.788000 197.379751 
 127.213333 35.788000 201.099943 
 127.213444 35.788000 205.122417 
 127.212444 35.788000 179.808191 
 127.212556 35.788000 181.419164 
 127.212667 35.788000 183.329313 
 127.212778 35.788000 185.536719 
 127.213000 35.788000 190.854051 
 127.213222 35.788000 197.379751 
 127.213333 35.788000 201.099943 
 127.213444 35.788000 205.122417 
 127.213556 35.788000 209.454556 
 127.212444 35.788111 180.030589 
 127.212556 35.788111 181.511991 
 127.212667 35.788111 183.292232 
 127.212778 35.788111 185.369594 
 127.213000 35.788111 190.426020 
 127.213222 35.788111 196.689853 
 127.213333 35.788111 200.278697 
 127.213444 35.788111 204.169681 
 127.213556 35.788111 208.369985 
 127.212444 35.788222 180.312336 
 127.212556 35.788222 181.664296 
 127.212667 35.788222 183.314758 
 127.212778 35.788222 185.262206 
 127.213000 35.788222 190.057990 
 127.213222 35.788222 196.060223 
 127.213333 35.788222 199.517854 
 127.213444 35.788222 203.277486 
 127.213556 35.788222 207.346091 
 127.212556 35.788222 181.664296 
 127.212667 35.788222 183.314758 
 127.212778 35.788222 185.262206 
 127.212889 35.788222 187.510768 
 127.213111 35.788222 192.908940 
 127.213333 35.788222 199.517854 
 127.213444 35.788222 203.277486 
 127.213556 35.788222 207.346091 
 127.213667 35.788222 211.718363 
 127.212556 35.788333 181.876705 
 127.212667 35.788333 183.397071 
 127.212778 35.788333 185.214288 
 127.212889 35.788333 187.332279 
 127.213111 35.788333 192.468697 
 127.213333 35.788333 198.814895 
 127.213444 35.788333 202.442859 
 127.213556 35.788333 206.379448 
 127.213667 35.788333 210.619565 
 127.212556 35.788444 182.148590 
 127.212667 35.788444 183.538988 
 127.212778 35.788444 185.226105 
 127.212889 35.788444 187.213657 
 127.213111 35.788444 192.088586 
 127.213333 35.788444 198.172338 
 127.213444 35.788444 201.668768 
 127.213556 35.788444 205.473479 
 127.213667 35.788444 209.581577 
 127.212667 35.788444 183.538988 
 127.212778 35.788444 185.226105 
 127.212889 35.788444 187.213657 
 127.213000 35.788444 189.499599 
 127.213222 35.788444 194.977631 
 127.213444 35.788444 201.668768 
 127.213556 35.788444 205.473479 
 127.213667 35.788444 209.581577 
 127.213778 35.788444 214.000579 
 127.212667 35.788556 183.741101 
 127.212778 35.788556 185.297800 
 127.212889 35.788556 187.154594 
 127.213000 35.788556 189.309644 
 127.213222 35.788556 194.525075 
 127.213444 35.788556 200.952649 
 127.213556 35.788556 204.625164 
 127.213667 35.788556 208.600927 
 127.213778 35.788556 212.887246 
 127.212667 35.788667 184.003319 
 127.212778 35.788667 185.429504 
 127.212889 35.788667 187.155448 
 127.213000 35.788667 189.179512 
 127.213222 35.788667 194.132156 
 127.213444 35.788667 200.295985 
 127.213556 35.788667 203.836213 
 127.213667 35.788667 207.679551 
 127.213778 35.788667 211.833098 
 127.212778 35.788778 185.620939 
 127.212889 35.788778 187.216163 
 127.213000 35.788778 189.109374 
 127.213111 35.788778 191.304610 
 127.213333 35.788778 196.599019 
 127.213556 35.788778 203.107930 
 127.213667 35.788778 206.818981 
 127.213778 35.788778 210.839893 
 127.213889 35.788778 215.165433 
 127.212778 35.788889 185.872865 
 127.212889 35.788889 187.337050 
 127.213000 35.788889 189.099089 
 127.213111 35.788889 191.162814 
 127.213333 35.788889 196.193588 
 127.213556 35.788889 202.437908 
 127.213667 35.788889 206.016352 
 127.213778 35.788889 209.904312 
 127.213889 35.788889 214.096761 
 127.212778 35.789000 186.184517 
 127.212889 35.789000 187.517794 
 127.213000 35.789000 189.148793 
 127.213111 35.789000 191.081139 
 127.213333 35.789000 195.848548 
 127.213556 35.789000 201.828548 
 127.213667 35.789000 205.274524 
 127.213778 35.789000 209.029670 
 127.213889 35.789000 213.089167 
 127.212889 35.789000 187.517794 
 127.213000 35.789000 189.148793 
 127.213111 35.789000 191.081139 
 127.213222 35.789000 193.312868 
 127.213444 35.789000 198.685269 
 127.213667 35.789000 205.274524 
 127.213778 35.789000 209.029670 
 127.213889 35.789000 213.089167 
 127.214000 35.789000 217.460450 
 127.212889 35.789111 187.759119 
 127.213000 35.789111 189.258758 
 127.213111 35.789111 191.059406 
 127.213222 35.789111 193.159304 
 127.213444 35.789111 198.267224 
 127.213667 35.789111 204.591042 
 127.213778 35.789111 208.213055 
 127.213889 35.789111 212.139282 
 127.214000 35.789111 216.376947 
 127.212889 35.789222 188.060297 
 127.213000 35.789222 189.428708 
 127.213111 35.789222 191.097790 
 127.213222 35.789222 193.065990 
 127.213444 35.789222 197.909700 
 127.213667 35.789222 203.968354 
 127.213778 35.789222 207.457374 
 127.213889 35.789222 211.250469 
 127.214000 35.789222 215.354656 
 127.213000 35.789222 189.428708 
 127.213111 35.789222 191.097790 
 127.213222 35.789222 193.065990 
 127.213333 35.789222 195.337459 
 127.213556 35.789222 200.787814 
 127.213778 35.789222 207.457374 
 127.213889 35.789222 211.250469 
 127.214000 35.789222 215.354656 
 127.214111 35.789222 219.764566 
 127.213000 35.789333 189.659329 
 127.213111 35.789333 191.196525 
 127.213222 35.789333 193.032706 
 127.213333 35.789333 195.171817 
 127.213556 35.789333 200.356847 
 127.213778 35.789333 206.760124 
 127.213889 35.789333 210.419769 
 127.214000 35.789333 214.390158 
 127.214111 35.789333 218.666133 
 127.213000 35.789445 189.950482 
 127.213111 35.789445 191.355697 
 127.213222 35.789445 193.059767 
 127.213333 35.789445 195.066426 
 127.213556 35.789445 199.985946 
 127.213778 35.789445 206.122757 
 127.213889 35.789445 209.648861 
 127.214000 35.789445 213.485364 
 127.214111 35.789445 217.627314 
 127.213111 35.789445 191.355697 
 127.213222 35.789445 193.059767 
 127.213333 35.789445 195.066426 
 127.213444 35.789445 197.373592 
 127.213667 35.789445 202.900456 
 127.213889 35.789445 209.648861 
 127.214000 35.789445 213.485364 
 127.214111 35.789445 217.627314 
 127.214222 35.789445 222.082274 
 127.213111 35.789556 191.574978 
 127.213222 35.789556 193.147069 
 127.213333 35.789556 195.021412 
 127.213444 35.789556 197.196128 
 127.213667 35.789556 202.457279 
 127.213889 35.789556 208.939017 
 127.214000 35.789556 212.641773 
 127.214111 35.789556 216.649840 
 127.214222 35.789556 220.970568 
 127.213111 35.789667 191.855224 
 127.213222 35.789667 193.295016 
 127.213333 35.789667 195.036720 
 127.213444 35.789667 197.078667 
 127.213667 35.789667 202.073463 
 127.213889 35.789667 208.287891 
 127.214000 35.789667 211.856580 
 127.214111 35.789667 215.730443 
 127.214222 35.789667 219.916621 
 127.213222 35.789667 193.295016 
 127.213333 35.789667 195.036720 
 127.213444 35.789667 197.078667 
 127.213556 35.789667 199.425120 
 127.213778 35.789667 205.028910 
 127.214000 35.789667 211.856580 
 127.214111 35.789667 215.730443 
 127.214222 35.789667 219.916621 
 127.214333 35.789667 224.409612 
 127.213222 35.789778 193.503198 
 127.213333 35.789778 195.112399 
 127.213444 35.789778 197.021711 
 127.213556 35.789778 199.235190 
 127.213778 35.789778 204.572424 
 127.214000 35.789778 211.132583 
 127.214111 35.789778 214.872384 
 127.214222 35.789778 218.924153 
 127.214333 35.789778 223.282598 
 127.213222 35.789889 193.772434 
 127.213333 35.789889 195.248809 
 127.213444 35.789889 197.025165 
 127.213556 35.789889 199.105347 
 127.213778 35.789889 204.175383 
 127.214000 35.789889 210.467390 
 127.214111 35.789889 214.072808 
 127.214222 35.789889 217.989847 
 127.214333 35.789889 222.213426 
 127.213222 35.790000 194.101899 
 127.213333 35.790000 195.445583 
 127.213444 35.790000 197.089117 
 127.213556 35.790000 199.036140 
 127.213778 35.790000 203.839252 
 127.214000 35.790000 209.863386 
 127.214111 35.790000 213.334561 
 127.214222 35.790000 217.117012 
 127.214333 35.790000 221.205867 
 127.213333 35.790000 195.445583 
 127.213444 35.790000 197.089117 
 127.213556 35.790000 199.036140 
 127.213667 35.790000 201.284656 
 127.213889 35.790000 206.696981 
 127.214111 35.790000 213.334561 
 127.214222 35.790000 217.117012 
 127.214333 35.790000 221.205867 
 127.214444 35.790000 225.608602 
 127.213333 35.790111 195.703498 
 127.213444 35.790111 197.213889 
 127.213556 35.790111 199.027429 
 127.213667 35.790111 201.142332 
 127.213889 35.790111 206.286616 
 127.214111 35.790111 212.655201 
 127.214222 35.790111 216.302743 
 127.214333 35.790111 220.256554 
 127.214444 35.790111 224.523896 
 127.213333 35.790222 196.021769 
 127.213444 35.790222 197.399151 
 127.213556 35.790222 199.079345 
 127.213667 35.790222 201.060771 
 127.213889 35.790222 205.937291 
 127.214111 35.790222 212.037163 
 127.214222 35.790222 215.549937 
 127.214333 35.790222 219.368846 
 127.214444 35.790222 223.500940 
 127.213444 35.790222 197.399151 
 127.213556 35.790222 199.079345 
 127.213667 35.790222 201.060771 
 127.213778 35.790222 203.347596 
 127.214000 35.790222 208.834975 
 127.214222 35.790222 215.549937 
 127.214333 35.790222 219.368846 
 127.214444 35.790222 223.500940 
 127.214556 35.790222 227.940798 
 127.213444 35.790333 197.645643 
 127.213556 35.790333 199.192167 
 127.213667 35.790333 201.039794 
 127.213778 35.790333 203.192480 
 127.214000 35.790333 208.410975 
 127.214222 35.790333 214.856101 
 127.214333 35.790333 218.539787 
 127.214444 35.790333 222.536310 
 127.214556 35.790333 226.840463 
 127.213444 35.790445 197.953198 
 127.213556 35.790445 199.365959 
 127.213667 35.790445 201.079694 
 127.213778 35.790445 203.098147 
 127.214000 35.790445 208.047575 
 127.214222 35.790445 214.222684 
 127.214333 35.790445 217.771056 
 127.214444 35.790445 221.631919 
 127.214556 35.790445 225.800276 
 127.213556 35.790445 199.365959 
 127.213667 35.790445 201.079694 
 127.213778 35.790445 203.098147 
 127.213889 35.790445 205.419208 
 127.214111 35.790445 210.980181 
 127.214333 35.790445 217.771056 
 127.214444 35.790445 221.631919 
 127.214556 35.790445 225.800276 
 127.214667 35.790445 230.283724 
 127.213556 35.790556 199.600364 
 127.213667 35.790556 201.180344 
 127.213778 35.790556 203.064702 
 127.213889 35.790556 205.251540 
 127.214111 35.790556 210.543252 
 127.214333 35.790556 217.063917 
 127.214444 35.790556 220.789263 
 127.214556 35.790556 224.821971 
 127.214667 35.790556 229.169421 
 127.213556 35.790667 199.896292 
 127.213667 35.790667 201.342192 
 127.213778 35.790667 203.092132 
 127.213889 35.790667 205.144422 
 127.214111 35.790667 210.166227 
 127.214333 35.790667 216.416034 
 127.214444 35.790667 220.005541 
 127.214556 35.790667 223.902276 
 127.214667 35.790667 228.113406 
 127.213667 35.790667 201.342192 
 127.213778 35.790667 203.092132 
 127.213889 35.790667 205.144422 
 127.214000 35.790667 207.503335 
 127.214222 35.790667 213.138328 
 127.214444 35.790667 220.005541 
 127.214556 35.790667 223.902276 
 127.214667 35.790667 228.113406 
 127.214778 35.790667 232.633384 
 127.213667 35.790778 201.564781 
 127.213778 35.790778 203.180441 
 127.213889 35.790778 205.098322 
 127.214000 35.790778 207.322486 
 127.214222 35.790778 212.687380 
 127.214444 35.790778 219.283546 
 127.214556 35.790778 223.044452 
 127.214667 35.790778 227.119407 
 127.214778 35.790778 231.503077 
 127.213667 35.790889 201.848979 
 127.213778 35.790889 203.330033 
 127.213889 35.790889 205.113181 
 127.214000 35.790889 207.202272 
 127.214222 35.790889 212.296419 
 127.214444 35.790889 218.620889 
 127.214556 35.790889 222.245644 
 127.214667 35.790889 226.184101 
 127.214778 35.790889 230.431139 
 127.213778 35.790889 203.330033 
 127.213889 35.790889 205.113181 
 127.214000 35.790889 207.202272 
 127.214111 35.790889 209.595083 
 127.214333 35.790889 215.303098 
 127.214556 35.790889 222.245644 
 127.214667 35.790889 226.184101 
 127.214778 35.790889 230.431139 
 127.214889 35.790889 234.994473 
 127.213778 35.791000 203.540495 
 127.213889 35.791000 205.189049 
 127.214000 35.791000 207.143206 
 127.214111 35.791000 209.400955 
 127.214333 35.791000 214.838034 
 127.214556 35.791000 221.508696 
 127.214667 35.791000 225.310800 
 127.214778 35.791000 229.421352 
 127.214889 35.791000 233.847854 
 127.213778 35.791111 203.812651 
 127.213889 35.791111 205.326285 
 127.214000 35.791111 207.145184 
 127.214111 35.791111 209.267546 
 127.214333 35.791111 214.433040 
 127.214556 35.791111 220.831170 
 127.214667 35.791111 224.496597 
 127.214778 35.791111 228.470340 
 127.214889 35.791111 232.759685 
 127.213778 35.791222 204.146293 
 127.213889 35.791222 205.524914 
 127.214000 35.791222 207.208461 
 127.214111 35.791222 209.195343 
 127.214333 35.791222 214.089068 
 127.214556 35.791222 220.214485 
 127.214667 35.791222 223.743145 
 127.214778 35.791222 227.579990 
 127.214889 35.791222 231.732090 
 127.213889 35.791222 205.524914 
 127.214000 35.791222 207.208461 
 127.214111 35.791222 209.195343 
 127.214222 35.791222 211.489728 
 127.214444 35.791222 216.998491 
 127.214667 35.791222 223.743145 
 127.214778 35.791222 227.579990 
 127.214889 35.791222 231.732090 
 127.215000 35.791222 236.193986 
 127.213889 35.791333 205.784534 
 127.214000 35.791333 207.332868 
 127.214111 35.791333 209.184412 
 127.214222 35.791333 211.343119 
 127.214444 35.791333 216.579927 
 127.214667 35.791333 223.051682 
 127.214778 35.791333 226.751775 
 127.214889 35.791333 230.766777 
 127.215000 35.791333 235.091443 
 127.213889 35.791445 206.106140 
 127.214000 35.791445 207.518936 
 127.214111 35.791445 209.234815 
 127.214222 35.791445 211.257517 
 127.214444 35.791445 216.221720 
 127.214667 35.791445 222.419926 
 127.214778 35.791445 225.982942 
 127.214889 35.791445 229.860521 
 127.215000 35.791445 234.047633 
 127.214000 35.791445 207.518936 
 127.214111 35.791445 209.234815 
 127.214222 35.791445 211.257517 
 127.214333 35.791445 213.584919 
 127.214556 35.791445 219.164833 
 127.214778 35.791445 225.982942 
 127.214889 35.791445 229.860521 
 127.215000 35.791445 234.047633 
 127.215111 35.791445 238.551894 
 127.214000 35.791556 207.766123 
 127.214111 35.791556 209.346478 
 127.214222 35.791556 211.233318 
 127.214333 35.791556 213.424730 
 127.214556 35.791556 218.731855 
 127.214778 35.791556 225.276232 
 127.214889 35.791556 229.016535 
 127.215000 35.791556 233.066241 
 127.215111 35.791556 237.432748 
 127.214000 35.791667 208.075381 
 127.214111 35.791667 209.519886 
 127.214222 35.791667 211.270535 
 127.214333 35.791667 213.325632 
 127.214556 35.791667 218.359316 
 127.214778 35.791667 224.629310 
 127.214889 35.791667 228.232012 
 127.215000 35.791667 232.143986 
 127.215111 35.791667 236.372416 
 127.214111 35.791667 209.519886 
 127.214222 35.791667 211.270535 
 127.214333 35.791667 213.325632 
 127.214444 35.791667 215.689445 
 127.214667 35.791667 221.340480 
 127.214889 35.791667 228.232012 
 127.215000 35.791667 232.143986 
 127.215111 35.791667 236.372416 
 127.215222 35.791667 240.911719 
 127.214111 35.791778 209.754541 
 127.214222 35.791778 211.369143 
 127.214333 35.791778 213.288065 
 127.214444 35.791778 215.515365 
 127.214667 35.791778 220.892778 
 127.214889 35.791778 227.509746 
 127.215000 35.791778 231.284137 
 127.215111 35.791778 235.374637 
 127.215222 35.791778 239.775881 
 127.214111 35.791889 210.051352 
 127.214222 35.791889 211.529578 
 127.214333 35.791889 213.312001 
 127.214444 35.791889 215.402460 
 127.214667 35.791889 220.505598 
 127.214889 35.791889 226.847349 
 127.215000 35.791889 230.483831 
 127.215111 35.791889 234.436076 
 127.215222 35.791889 238.698934 
 127.214222 35.791889 211.529578 
 127.214333 35.791889 213.312001 
 127.214444 35.791889 215.402460 
 127.214556 35.791889 217.798725 
 127.214778 35.791889 223.519882 
 127.215000 35.791889 230.483831 
 127.215111 35.791889 234.436076 
 127.215222 35.791889 238.698934 
 127.215333 35.791889 243.280139 
 127.214222 35.792000 211.751825 
 127.214333 35.792000 213.397655 
 127.214444 35.792000 215.351182 
 127.214556 35.792000 217.610388 
 127.214778 35.792000 223.056619 
 127.215000 35.792000 229.744699 
 127.215111 35.792000 233.558600 
 127.215222 35.792000 237.682985 
 127.215333 35.792000 242.125369 
 127.214222 35.792111 212.035442 
 127.214333 35.792111 213.544820 
 127.214444 35.792111 215.361558 
 127.214556 35.792111 217.483850 
 127.214778 35.792111 222.655446 
 127.215000 35.792111 229.067953 
 127.215111 35.792111 232.743659 
 127.215222 35.792111 236.729720 
 127.215333 35.792111 241.033434 
 127.214222 35.792222 212.381505 
 127.214333 35.792222 213.754104 
 127.214444 35.792222 215.433725 
 127.214556 35.792222 217.418775 
 127.214778 35.792222 222.315081 
 127.215000 35.792222 228.451360 
 127.215111 35.792222 231.988544 
 127.215222 35.792222 235.835956 
 127.215333 35.792222 240.000673 
 127.214333 35.792222 213.754104 
 127.214444 35.792222 215.433725 
 127.214556 35.792222 217.418775 
 127.214667 35.792222 219.713412 
 127.214889 35.792222 225.228905 
 127.215111 35.792222 231.988544 
 127.215222 35.792222 235.835956 
 127.215333 35.792222 240.000673 
 127.215444 35.792222 244.477210 
 127.214333 35.792333 214.024886 
 127.214444 35.792333 215.567532 
 127.214556 35.792333 217.415485 
 127.214667 35.792333 219.572685 
 127.214889 35.792333 224.812713 
 127.215111 35.792333 231.295950 
 127.215222 35.792333 235.004861 
 127.215333 35.792333 239.030732 
 127.215444 35.792333 243.368295 
 127.214333 35.792444 214.358198 
 127.214444 35.792444 215.763541 
 127.214556 35.792444 217.474068 
 127.214667 35.792444 219.493503 
 127.214889 35.792444 224.457409 
 127.215111 35.792444 230.663589 
 127.215222 35.792444 234.233672 
 127.215333 35.792444 238.120371 
 127.215444 35.792444 242.318633 
 127.214444 35.792444 215.763541 
 127.214556 35.792444 217.474068 
 127.214667 35.792444 219.493503 
 127.214778 35.792444 221.819719 
 127.215000 35.792444 227.403478 
 127.215222 35.792444 234.233672 
 127.215333 35.792444 238.120371 
 127.215444 35.792444 242.318633 
 127.215556 35.792444 246.836086 
 127.214444 35.792555 216.021177 
 127.214556 35.792555 217.594422 
 127.214667 35.792555 219.476236 
 127.214778 35.792555 221.664709 
 127.215000 35.792555 226.972174 
 127.215222 35.792555 233.525139 
 127.215333 35.792555 237.272815 
 127.215444 35.792555 241.331928 
 127.215556 35.792555 245.709886 
 127.214444 35.792667 216.341426 
 127.214556 35.792667 217.777060 
 127.214667 35.792667 219.520924 
 127.214778 35.792667 221.571325 
 127.215000 35.792667 226.601840 
 127.215222 35.792667 232.876919 
 127.215333 35.792667 236.485246 
 127.215444 35.792667 240.404882 
 127.215556 35.792667 244.643016 
 127.214556 35.792667 217.777060 
 127.214667 35.792667 219.520924 
 127.214778 35.792667 221.571325 
 127.214889 35.792667 223.932517 
 127.215111 35.792667 229.584519 
 127.215333 35.792667 236.485246 
 127.215444 35.792667 240.404882 
 127.215556 35.792667 244.643016 
 127.215667 35.792667 249.194045 
 127.214556 35.792778 218.021453 
 127.214667 35.792778 219.627513 
 127.214778 35.792778 221.539987 
 127.214889 35.792778 223.762914 
 127.215111 35.792778 229.137795 
 127.215333 35.792778 235.760467 
 127.215444 35.792778 239.540778 
 127.215556 35.792778 243.639242 
 127.215667 35.792778 248.050473 
 127.214556 35.792889 218.328543 
 127.214667 35.792889 219.796469 
 127.214778 35.792889 221.570687 
 127.214889 35.792889 223.655018 
 127.215111 35.792889 228.752121 
 127.215333 35.792889 235.096081 
 127.215444 35.792889 238.736739 
 127.215556 35.792889 242.695204 
 127.215667 35.792889 246.966310 
 127.214667 35.792889 219.796469 
 127.214778 35.792889 221.570687 
 127.214889 35.792889 223.655018 
 127.215000 35.792889 226.047232 
 127.215222 35.792889 231.766481 
 127.215444 35.792889 238.736739 
 127.215556 35.792889 242.695204 
 127.215667 35.792889 246.966310 
 127.215778 35.792889 251.557796 
 127.214667 35.793000 220.027761 
 127.214778 35.793000 221.663631 
 127.214889 35.793000 223.609275 
 127.215000 35.793000 225.862679 
 127.215222 35.793000 231.303504 
 127.215444 35.793000 237.994403 
 127.215556 35.793000 241.812782 
 127.215667 35.793000 245.943675 
 127.215778 35.793000 250.394602 
 127.214667 35.793111 220.320929 
 127.214778 35.793111 221.818597 
 127.214889 35.793111 223.625700 
 127.215000 35.793111 225.740444 
 127.215222 35.793111 230.903143 
 127.215444 35.793111 237.314985 
 127.215556 35.793111 240.993430 
 127.215667 35.793111 244.984264 
 127.215778 35.793111 249.294786 
 127.214778 35.793111 221.818597 
 127.214889 35.793111 223.625700 
 127.215000 35.793111 225.740444 
 127.215111 35.793111 228.167180 
 127.215333 35.793111 233.953659 
 127.215556 35.793111 240.993430 
 127.215667 35.793111 244.984264 
 127.215778 35.793111 249.294786 
 127.215889 35.793111 253.919274 
 127.214778 35.793222 222.036218 
 127.214889 35.793222 223.704451 
 127.215000 35.793222 225.680203 
 127.215111 35.793222 227.967608 
 127.215333 35.793222 233.474837 
 127.215556 35.793222 240.234426 
 127.215667 35.793222 244.084872 
 127.215778 35.793222 248.254660 
 127.215889 35.793222 252.738289 
 127.214778 35.793333 222.315844 
 127.214889 35.793333 223.845354 
 127.215000 35.793333 225.682262 
 127.215111 35.793333 227.830485 
 127.215333 35.793333 233.058765 
 127.215556 35.793333 239.538475 
 127.215667 35.793333 243.248687 
 127.215778 35.793333 247.277896 
 127.215889 35.793333 251.620821 
 127.214778 35.793444 222.658539 
 127.214889 35.793444 224.048994 
 127.215000 35.793444 225.746727 
 127.215111 35.793444 227.755437 
 127.215333 35.793444 232.704107 
 127.215556 35.793444 238.903280 
 127.215667 35.793444 242.472928 
 127.215778 35.793444 246.361229 
 127.215889 35.793444 250.563121 
 127.214889 35.793444 224.048994 
 127.215000 35.793444 225.746727 
 127.215111 35.793444 227.755437 
 127.215222 35.793444 230.073006 
 127.215444 35.793444 235.645648 
 127.215667 35.793444 242.472928 
 127.215778 35.793444 246.361229 
 127.215889 35.793444 250.563121 
 127.216000 35.793444 255.086231 
 127.214889 35.793555 224.314769 
 127.215000 35.793555 225.873476 
 127.215111 35.793555 227.742820 
 127.215222 35.793555 229.920905 
 127.215444 35.793555 235.213777 
 127.215667 35.793555 241.760359 
 127.215778 35.793555 245.507906 
 127.215889 35.793555 249.568920 
 127.216000 35.793555 253.950808 
 127.214889 35.793667 224.643694 
 127.215000 35.793667 226.063042 
 127.215111 35.793667 227.792691 
 127.215222 35.793667 229.830960 
 127.215444 35.793667 234.843400 
 127.215667 35.793667 241.108623 
 127.215778 35.793667 244.715086 
 127.215889 35.793667 248.634894 
 127.216000 35.793667 252.875229 
 127.215000 35.793667 226.063042 
 127.215111 35.793667 227.792691 
 127.215222 35.793667 229.830960 
 127.215333 35.793667 232.182081 
 127.215556 35.793667 237.820125 
 127.215778 35.793667 244.715086 
 127.215889 35.793667 248.634894 
 127.216000 35.793667 252.875229 
 127.216111 35.793667 257.430476 
 127.215000 35.793778 226.315361 
 127.215111 35.793778 227.905222 
 127.215222 35.793778 229.803585 
 127.215333 35.793778 232.014460 
 127.215556 35.793778 237.371430 
 127.215778 35.793778 243.984391 
 127.215889 35.793778 247.762904 
 127.216000 35.793778 251.861599 
 127.216111 35.793778 256.275084 
 127.215000 35.793889 226.629936 
 127.215111 35.793889 228.080158 
 127.215222 35.793889 229.838764 
 127.215333 35.793889 231.909543 
 127.215556 35.793889 236.985744 
 127.215778 35.793889 243.317012 
 127.215889 35.793889 246.954386 
 127.216000 35.793889 250.911598 
 127.216111 35.793889 255.183477 
 127.215111 35.793889 228.080158 
 127.215222 35.793889 229.838764 
 127.215333 35.793889 231.909543 
 127.215444 35.793889 234.290281 
 127.215667 35.793889 239.992738 
 127.215889 35.793889 246.954386 
 127.216000 35.793889 250.911598 
 127.216111 35.793889 255.183477 
 127.216222 35.793889 259.777755 
 127.215111 35.794000 228.318199 
 127.215222 35.794000 229.936716 
 127.215333 35.794000 231.867068 
 127.215444 35.794000 234.107260 
 127.215667 35.794000 239.527825 
 127.215889 35.794000 246.206654 
 127.216000 35.794000 250.022053 
 127.216111 35.794000 254.151996 
 127.216222 35.794000 258.603992 
 127.215111 35.794111 228.618626 
 127.215222 35.794111 230.097203 
 127.215333 35.794111 231.887279 
 127.215444 35.794111 233.987076 
 127.215667 35.794111 239.126054 
 127.215889 35.794111 245.522375 
 127.216000 35.794111 249.196117 
 127.216111 35.794111 253.184281 
 127.216222 35.794111 257.494154 
 127.215222 35.794111 230.097203 
 127.215333 35.794111 231.887279 
 127.215444 35.794111 233.987076 
 127.215556 35.794111 236.400919 
 127.215778 35.794111 242.167785 
 127.216000 35.794111 249.196117 
 127.216111 35.794111 253.184281 
 127.216222 35.794111 257.494154 
 127.216333 35.794111 262.120011 
 127.215222 35.794222 230.320877 
 127.215333 35.794222 231.970344 
 127.215444 35.794222 233.929414 
 127.215556 35.794222 236.202191 
 127.215778 35.794222 241.686347 
 127.216000 35.794222 248.431044 
 127.216111 35.794222 252.277099 
 127.216222 35.794222 256.444518 
 127.216333 35.794222 260.927799 
 127.215222 35.794333 230.607067 
 127.215333 35.794333 232.116075 
 127.215444 35.794333 233.934570 
 127.215556 35.794333 236.066433 
 127.215778 35.794333 241.268187 
 127.216000 35.794333 247.729562 
 127.216111 35.794333 251.433664 
 127.216222 35.794333 255.458788 
 127.216333 35.794333 259.799651 
 127.215222 35.794444 230.956856 
 127.215333 35.794444 232.325072 
 127.215444 35.794444 234.002659 
 127.215556 35.794444 235.993276 
 127.215778 35.794444 240.911962 
 127.216000 35.794444 247.089351 
 127.216111 35.794444 250.651170 
 127.216222 35.794444 254.533667 
 127.216333 35.794444 258.731782 
 127.215333 35.794444 232.325072 
 127.215444 35.794444 234.002659 
 127.215556 35.794444 235.993276 
 127.215667 35.794444 238.294831 
 127.215889 35.794444 243.841594 
 127.216111 35.794444 250.651170 
 127.216222 35.794444 254.533667 
 127.216333 35.794444 258.731782 
 127.216444 35.794444 263.253131 
 127.215333 35.794555 232.596715 
 127.215444 35.794555 234.133546 
 127.215556 35.794555 235.983069 
 127.215667 35.794555 238.143414 
 127.215889 35.794555 243.406961 
 127.216111 35.794555 249.932403 
 127.216222 35.794555 253.672431 
 127.216333 35.794555 257.727958 
 127.216444 35.794555 262.106373 
 127.215333 35.794667 232.932038 
 127.215444 35.794667 234.327779 
 127.215556 35.794667 236.035875 
 127.215667 35.794667 238.054677 
 127.215889 35.794667 243.034343 
 127.216111 35.794667 249.274986 
 127.216222 35.794667 252.872212 
 127.216333 35.794667 256.784819 
 127.216444 35.794667 261.019970 
 127.215444 35.794667 234.327779 
 127.215556 35.794667 236.035875 
 127.215667 35.794667 238.054677 
 127.215778 35.794667 240.388377 
 127.216000 35.794667 245.997752 
 127.216222 35.794667 252.872212 
 127.216333 35.794667 256.784819 
 127.216444 35.794667 261.019970 
 127.216556 35.794667 265.572053 
 127.215444 35.794778 234.585285 
 127.215556 35.794778 236.151864 
 127.215667 35.794778 238.029033 
 127.215778 35.794778 240.220761 
 127.216000 35.794778 245.545619 
 127.216222 35.794778 252.134645 
 127.216333 35.794778 255.904245 
 127.216444 35.794778 259.996045 
 127.216556 35.794778 264.404657 
 127.215444 35.794889 234.905559 
 127.215556 35.794889 236.330772 
 127.215667 35.794889 238.066460 
 127.215778 35.794889 240.116371 
 127.216000 35.794889 245.157024 
 127.216222 35.794889 251.460932 
 127.216333 35.794889 255.087683 
 127.216444 35.794889 259.036293 
 127.216556 35.794889 263.301596 
 127.215556 35.794889 236.330772 
 127.215667 35.794889 238.066460 
 127.215778 35.794889 240.116371 
 127.215889 35.794889 242.478315 
 127.216111 35.794889 248.149323 
 127.216333 35.794889 255.087683 
 127.216444 35.794889 259.036293 
 127.216556 35.794889 263.301596 
 127.216667 35.794889 267.891309 
 127.215556 35.795000 236.573313 
 127.215667 35.795000 238.167187 
 127.215778 35.795000 240.074946 
 127.215889 35.795000 242.294624 
 127.216111 35.795000 247.680304 
 127.216333 35.795000 254.332421 
 127.216444 35.795000 258.137508 
 127.216556 35.795000 262.259170 
 127.216667 35.795000 266.704896 
 127.215556 35.795111 236.878750 
 127.215667 35.795111 238.330964 
 127.215778 35.795111 240.096726 
 127.215889 35.795111 242.174293 
 127.216111 35.795111 247.274959 
 127.216333 35.795111 253.641150 
 127.216444 35.795111 257.302874 
 127.216556 35.795111 261.281056 
 127.216667 35.795111 265.582959 
 127.215667 35.795111 238.330964 
 127.215778 35.795111 240.096726 
 127.215889 35.795111 242.174293 
 127.216000 35.795111 244.567947 
 127.216222 35.795111 250.300600 
 127.216444 35.795111 257.302874 
 127.216556 35.795111 261.281056 
 127.216667 35.795111 265.582959 
 127.216778 35.795111 270.202864 
 127.215667 35.795222 238.558453 
 127.215778 35.795222 240.181884 
 127.215889 35.795222 242.117006 
 127.216000 35.795222 244.367876 
 127.216222 35.795222 249.814392 
 127.216444 35.795222 256.529616 
 127.216556 35.795222 260.363984 
 127.216667 35.795222 264.521731 
 127.216778 35.795222 268.997362 
 127.215667 35.795333 238.848971 
 127.215778 35.795333 240.330225 
 127.215889 35.795333 242.123056 
 127.216000 35.795333 244.231299 
 127.216222 35.795333 249.391994 
 127.216444 35.795333 255.820487 
 127.216556 35.795333 259.511204 
 127.216667 35.795333 263.524956 
 127.216778 35.795333 267.856475 
 127.215778 35.795333 240.330225 
 127.215889 35.795333 242.123056 
 127.216000 35.795333 244.231299 
 127.216111 35.795333 246.652672 
 127.216333 35.795333 252.445995 
 127.216556 35.795333 259.511204 
 127.216667 35.795333 263.524956 
 127.216778 35.795333 267.856475 
 127.216889 35.795333 272.513579 
 127.215778 35.795444 240.542356 
 127.215889 35.795444 242.192562 
 127.216000 35.795444 244.157844 
 127.216111 35.795444 246.436141 
 127.216333 35.795444 251.942521 
 127.216556 35.795444 258.719874 
 127.216667 35.795444 262.589299 
 127.216778 35.795444 266.776374 
 127.216889 35.795444 271.288689 
 127.215778 35.795556 240.818176 
 127.215889 35.795556 242.325667 
 127.216000 35.795556 244.147897 
 127.216111 35.795556 246.283030 
 127.216333 35.795556 251.502290 
 127.216556 35.795556 257.991615 
 127.216667 35.795556 261.716627 
 127.216778 35.795556 265.759172 
 127.216889 35.795556 270.126614 
 127.215778 35.795667 241.157144 
 127.215889 35.795667 242.522076 
 127.216000 35.795667 244.201411 
 127.216111 35.795667 246.193536 
 127.216333 35.795667 251.125994 
 127.216556 35.795667 257.327612 
 127.216667 35.795667 260.908372 
 127.216778 35.795667 264.806551 
 127.216889 35.795667 269.029284 
 127.215889 35.795667 242.522076 
 127.216000 35.795667 244.201411 
 127.216111 35.795667 246.193536 
 127.216222 35.795667 248.502597 
 127.216444 35.795667 254.068864 
 127.216667 35.795667 260.908372 
 127.216778 35.795667 264.806551 
 127.216889 35.795667 269.029284 
 127.217000 35.795667 273.574660 
 127.215889 35.795778 242.782561 
 127.216000 35.795778 244.318665 
 127.216111 35.795778 246.167448 
 127.216222 35.795778 248.332830 
 127.216444 35.795778 253.611173 
 127.216667 35.795778 260.161851 
 127.216778 35.795778 263.915329 
 127.216889 35.795778 267.993019 
 127.217000 35.795778 272.393123 
 127.215889 35.795889 243.106327 
 127.216000 35.795889 244.499356 
 127.216111 35.795889 246.204954 
 127.216222 35.795889 248.226814 
 127.216444 35.795889 253.217553 
 127.216667 35.795889 259.479723 
 127.216778 35.795889 263.088664 
 127.216889 35.795889 267.021476 
 127.217000 35.795889 271.276473 
 127.216000 35.795889 244.499356 
 127.216111 35.795889 246.204954 
 127.216222 35.795889 248.226814 
 127.216333 35.795889 250.562786 
 127.216556 35.795889 256.187972 
 127.216778 35.795889 263.088664 
 127.216889 35.795889 267.021476 
 127.217000 35.795889 271.276473 
 127.217111 35.795889 275.850960 
 127.216000 35.796000 244.744202 
 127.216111 35.796000 246.306279 
 127.216222 35.796000 248.184282 
 127.216333 35.796000 250.376285 
 127.216556 35.796000 255.712746 
 127.216778 35.796000 262.323808 
 127.216889 35.796000 266.111406 
 127.217000 35.796000 270.220962 
 127.217111 35.796000 274.649893 
 127.216000 35.796111 245.052460 
 127.216111 35.796111 246.471173 
 127.216222 35.796111 248.205476 
 127.216333 35.796111 250.253670 
 127.216556 35.796111 255.301727 
 127.216778 35.796111 261.623484 
 127.216889 35.796111 265.266034 
 127.217000 35.796111 269.230313 
 127.217111 35.796111 273.513854 
 127.216111 35.796111 246.471173 
 127.216222 35.796111 248.205476 
 127.216333 35.796111 250.253670 
 127.216444 35.796111 252.619984 
 127.216667 35.796111 258.304124 
 127.216889 35.796111 265.266034 
 127.217000 35.796111 269.230313 
 127.217111 35.796111 273.513854 
 127.217222 35.796111 278.124395 
 127.216111 35.796222 246.700300 
 127.216222 35.796222 248.290569 
 127.216333 35.796222 250.194617 
 127.216444 35.796222 252.416449 
 127.216667 35.796222 257.811063 
 127.216889 35.796222 264.482545 
 127.217000 35.796222 268.301213 
 127.217111 35.796222 272.439030 
 127.217222 35.796222 276.903503 
 127.216111 35.796333 246.993531 
 127.216222 35.796333 248.439674 
 127.216333 35.796333 250.199488 
 127.216444 35.796333 252.276750 
 127.216667 35.796333 257.381664 
 127.216889 35.796333 263.762547 
 127.217000 35.796333 267.435518 
 127.217111 35.796333 271.427526 
 127.217222 35.796333 275.745847 
 127.216222 35.796333 248.439674 
 127.216333 35.796333 250.199488 
 127.216444 35.796333 252.276750 
 127.216556 35.796333 254.669218 
 127.216778 35.796333 260.410851 
 127.217000 35.796333 267.435518 
 127.217111 35.796333 271.427526 
 127.217222 35.796333 275.745847 
 127.217333 35.796333 280.384730 
 127.216222 35.796444 248.652469 
 127.216333 35.796444 250.268208 
 127.216444 35.796444 252.201059 
 127.216556 35.796444 254.449008 
 127.216778 35.796444 259.900817 
 127.217000 35.796444 266.634648 
 127.217111 35.796444 270.481013 
 127.217222 35.796444 274.653350 
 127.217333 35.796444 279.146136 
 127.216222 35.796556 248.929783 
 127.216333 35.796556 250.401110 
 127.216444 35.796556 252.189214 
 127.216556 35.796556 254.292307 
 127.216778 35.796556 259.453619 
 127.217000 35.796556 265.895942 
 127.217111 35.796556 269.596328 
 127.217222 35.796556 273.622347 
 127.217333 35.796556 277.968701 
 127.216222 35.796667 249.270761 
 127.216333 35.796667 250.597835 
 127.216444 35.796667 252.241352 
 127.216556 35.796667 254.199749 
 127.216778 35.796667 259.070891 
 127.217000 35.796667 265.222035 
 127.217111 35.796667 268.776609 
 127.217222 35.796667 272.656475 
 127.217333 35.796667 276.856566 
 127.216333 35.796667 250.597835 
 127.216444 35.796667 252.241352 
 127.216556 35.796667 254.199749 
 127.216667 35.796667 256.477115 
 127.216889 35.796667 261.986163 
 127.217111 35.796667 268.776609 
 127.217222 35.796667 272.656475 
 127.217333 35.796667 276.856566 
 127.217444 35.796667 281.384484 
 127.216333 35.796778 250.859156 
 127.216444 35.796778 252.357749 
 127.216556 35.796778 254.171115 
 127.216667 35.796778 256.303112 
 127.216889 35.796778 261.520869 
 127.217111 35.796778 268.019129 
 127.217222 35.796778 271.752508 
 127.217333 35.796778 275.805999 
 127.217444 35.796778 280.186977 
 127.216333 35.796889 251.184274 
 127.216444 35.796889 252.538103 
 127.216556 35.796889 254.206597 
 127.216667 35.796889 256.193389 
 127.216889 35.796889 261.120183 
 127.217111 35.796889 267.326588 
 127.217222 35.796889 270.913646 
 127.217333 35.796889 274.820706 
 127.217444 35.796889 279.054913 
 127.216444 35.796889 252.538103 
 127.216556 35.796889 254.206597 
 127.216667 35.796889 256.193389 
 127.216778 35.796889 258.496375 
 127.217000 35.796889 264.064144 
 127.217222 35.796889 270.913646 
 127.217333 35.796889 274.820706 
 127.217444 35.796889 279.054913 
 127.217556 35.796889 283.610640 
 127.216444 35.797000 252.783131 
 127.216556 35.797000 254.306416 
 127.216667 35.797000 256.147665 
 127.216778 35.797000 258.305001 
 127.217000 35.797000 263.580572 
 127.217222 35.797000 270.137098 
 127.217333 35.797000 273.897392 
 127.217444 35.797000 277.984491 
 127.217556 35.797000 282.393000 
 127.216444 35.797111 253.092088 
 127.216556 35.797111 254.470326 
 127.216667 35.797111 256.166193 
 127.216778 35.797111 258.178042 
 127.217000 35.797111 263.161746 
 127.217222 35.797111 269.425629 
 127.217333 35.797111 273.039324 
 127.217444 35.797111 276.979485 
 127.217556 35.797111 281.240947 
 127.216556 35.797111 254.470326 
 127.216667 35.797111 256.166193 
 127.216778 35.797111 258.178042 
 127.216889 35.797111 260.510039 
 127.217111 35.797111 266.131719 
 127.217333 35.797111 273.039324 
 127.217444 35.797111 276.979485 
 127.217556 35.797111 281.240947 
 127.217667 35.797111 285.831405 
 127.216556 35.797222 254.698988 
 127.216667 35.797222 256.249135 
 127.216778 35.797222 258.115158 
 127.216889 35.797222 260.300995 
 127.217111 35.797222 265.629803 
 127.217333 35.797222 272.243646 
 127.217444 35.797222 276.036532 
 127.217556 35.797222 280.150609 
 127.217667 35.797222 284.593343 
 127.216556 35.797333 254.992272 
 127.216667 35.797333 256.396611 
 127.216778 35.797333 258.116721 
 127.216889 35.797333 260.156311 
 127.217111 35.797333 265.192074 
 127.217333 35.797333 271.511984 
 127.217444 35.797333 275.157511 
 127.217556 35.797333 279.124122 
 127.217667 35.797333 283.419048 
 127.216667 35.797333 256.396611 
 127.216778 35.797333 258.116721 
 127.216889 35.797333 260.156311 
 127.217000 35.797333 262.515166 
 127.217222 35.797333 268.192244 
 127.217444 35.797333 275.157511 
 127.217556 35.797333 279.124122 
 127.217667 35.797333 283.419048 
 127.217778 35.797333 288.036568 
 127.216667 35.797444 256.608298 
 127.216778 35.797444 258.182658 
 127.216889 35.797444 260.076164 
 127.217000 35.797444 262.288716 
 127.217222 35.797444 267.672640 
 127.217444 35.797444 274.343865 
 127.217556 35.797444 278.163179 
 127.217667 35.797444 282.310469 
 127.217778 35.797444 286.780244 
 127.216667 35.797556 256.885022 
 127.216778 35.797556 258.313293 
 127.216889 35.797556 260.060377 
 127.217000 35.797556 262.126287 
 127.217222 35.797556 267.216380 
 127.217444 35.797556 273.592889 
 127.217556 35.797556 277.264568 
 127.217667 35.797556 281.263885 
 127.217778 35.797556 285.585579 
 127.216667 35.797667 257.225927 
 127.216778 35.797667 258.508273 
 127.216889 35.797667 260.109099 
 127.217000 35.797667 262.028532 
 127.217222 35.797667 266.825128 
 127.217444 35.797667 272.907258 
 127.217556 35.797667 276.431473 
 127.217667 35.797667 280.282988 
 127.217778 35.797667 284.456773 
 127.216778 35.797667 258.508273 
 127.216889 35.797667 260.109099 
 127.217000 35.797667 262.028532 
 127.217111 35.797667 264.265703 
 127.217333 35.797667 269.703805 
 127.217556 35.797667 276.431473 
 127.217667 35.797667 280.282988 
 127.217778 35.797667 284.456773 
 127.217889 35.797667 288.960384 
 127.216778 35.797778 258.768367 
 127.216889 35.797778 260.222596 
 127.217000 35.797778 261.995213 
 127.217111 35.797778 264.085464 
 127.217333 35.797778 269.228952 
 127.217556 35.797778 275.661123 
 127.217667 35.797778 279.364498 
 127.217778 35.797778 283.390037 
 127.217889 35.797778 287.745061 
 127.216778 35.797889 259.092778 
 127.216889 35.797889 260.400573 
 127.217000 35.797889 262.026540 
 127.217111 35.797889 263.970037 
 127.217333 35.797889 268.819247 
 127.217556 35.797889 274.956259 
 127.217667 35.797889 278.511666 
 127.217778 35.797889 282.389130 
 127.217889 35.797889 286.595743 
 127.216889 35.797889 260.400573 
 127.217000 35.797889 262.026540 
 127.217111 35.797889 263.970037 
 127.217222 35.797889 266.235120 
 127.217444 35.797889 271.727477 
 127.217667 35.797889 278.511666 
 127.217778 35.797889 282.389130 
 127.217889 35.797889 286.595743 
 127.218000 35.797889 291.125915 
 127.216889 35.798000 260.643740 
 127.217000 35.798000 262.122717 
 127.217111 35.798000 263.919121 
 127.217222 35.798000 266.036778 
 127.217444 35.798000 271.233739 
 127.217667 35.798000 277.721652 
 127.217778 35.798000 281.450705 
 127.217889 35.798000 285.508567 
 127.218000 35.798000 289.889883 
 127.216889 35.798111 260.951943 
 127.217000 35.798111 262.283842 
 127.217111 35.798111 263.933067 
 127.217222 35.798111 265.903211 
 127.217444 35.798111 270.804606 
 127.217667 35.798111 276.996075 
 127.217778 35.798111 280.576633 
 127.217889 35.798111 284.485662 
 127.218000 35.798111 288.718041 
 127.217000 35.798111 262.283842 
 127.217111 35.798111 263.933067 
 127.217222 35.798111 265.903211 
 127.217333 35.798111 268.192192 
 127.217556 35.798111 273.737365 
 127.217778 35.798111 280.576633 
 127.217889 35.798111 284.485662 
 127.218000 35.798111 288.718041 
 127.218111 35.798111 293.281413 
 127.217000 35.798222 262.509569 
 127.217111 35.798222 264.011780 
 127.217222 35.798222 265.834579 
 127.217333 35.798222 267.976112 
 127.217556 35.798222 273.225621 
 127.217778 35.798222 279.768347 
 127.217889 35.798222 283.528716 
 127.218000 35.798222 287.612331 
 127.218111 35.798222 292.026601 
 127.217000 35.798333 262.800770 
 127.217111 35.798333 264.155628 
 127.217222 35.798333 265.830741 
 127.217333 35.798333 267.824488 
 127.217556 35.798333 272.777652 
 127.217778 35.798333 279.023159 
 127.217889 35.798333 282.634531 
 127.218000 35.798333 286.569044 
 127.218111 35.798333 290.833874 
 127.217111 35.798333 264.155628 
 127.217222 35.798333 265.830741 
 127.217333 35.798333 267.824488 
 127.217444 35.798333 270.141000 
 127.217667 35.798333 275.739585 
 127.217889 35.798333 282.634531 
 127.218000 35.798333 286.569044 
 127.218111 35.798333 290.833874 
 127.218222 35.798333 295.423340 
 127.217111 35.798444 264.364212 
 127.217222 35.798444 265.891807 
 127.217333 35.798444 267.737935 
 127.217444 35.798444 269.906496 
 127.217667 35.798444 275.208641 
 127.217889 35.798444 281.806274 
 127.218000 35.798444 285.591859 
 127.218111 35.798444 289.707424 
 127.218222 35.798444 294.147522 
 127.217111 35.798556 264.638348 
 127.217222 35.798556 266.018083 
 127.217333 35.798556 267.716252 
 127.217444 35.798556 269.736522 
 127.217667 35.798556 274.741548 
 127.217889 35.798556 281.041189 
 127.218000 35.798556 284.677508 
 127.218111 35.798556 288.643469 
 127.218222 35.798556 292.933861 
 127.217222 35.798667 266.209232 
 127.217333 35.798667 267.759610 
 127.217444 35.798667 269.631758 
 127.217556 35.798667 271.823743 
 127.217778 35.798667 277.177608 
 127.218000 35.798667 283.829228 
 127.218111 35.798667 287.645761 
 127.218222 35.798667 291.786622 
 127.218333 35.798667 296.259308 
 127.217222 35.798778 266.466008 
 127.217333 35.798778 267.868255 
 127.217444 35.798778 269.591940 
 127.217556 35.798778 271.635362 
 127.217778 35.798778 276.691337 
 127.218000 35.798778 283.044195 
 127.218111 35.798778 286.710961 
 127.218222 35.798778 290.701952 
 127.218333 35.798778 295.024431 
 127.217222 35.798889 266.788234 
 127.217333 35.798889 268.042263 
 127.217444 35.798889 269.617399 
 127.217556 35.798889 271.512174 
 127.217778 35.798889 276.270089 
 127.218000 35.798889 282.324019 
 127.218111 35.798889 285.840936 
 127.218222 35.798889 289.681977 
 127.218333 35.798889 293.854168 
 127.217333 35.798889 268.042263 
 127.217444 35.798889 269.617399 
 127.217556 35.798889 271.512174 
 127.217667 35.798889 273.730563 
 127.217889 35.798889 279.135738 
 127.218111 35.798889 285.840936 
 127.218222 35.798889 289.681977 
 127.218333 35.798889 293.854168 
 127.218444 35.798889 298.351971 
 127.217333 35.799000 268.281264 
 127.217444 35.799000 269.708020 
 127.217556 35.799000 271.454318 
 127.217667 35.799000 273.523898 
 127.217889 35.799000 278.630925 
 127.218111 35.799000 285.037110 
 127.218222 35.799000 288.728376 
 127.218333 35.799000 292.750457 
 127.218444 35.799000 297.098048 
 127.217333 35.799111 268.586176 
 127.217444 35.799111 269.864212 
 127.217556 35.799111 271.461691 
 127.217667 35.799111 273.382121 
 127.217889 35.799111 278.190320 
 127.218111 35.799111 284.296810 
 127.218222 35.799111 287.837962 
 127.218333 35.799111 291.709594 
 127.218444 35.799111 295.906635 
 127.217444 35.799111 269.864212 
 127.217556 35.799111 271.461691 
 127.217667 35.799111 273.382121 
 127.217778 35.799111 275.623492 
 127.218000 35.799111 281.079582 
 127.218222 35.799111 287.837962 
 127.218333 35.799111 291.709594 
 127.218444 35.799111 295.906635 
 127.218556 35.799111 300.436670 
 127.217444 35.799222 270.085532 
 127.217556 35.799222 271.534364 
 127.217667 35.799222 273.305815 
 127.217778 35.799222 275.398111 
 127.218000 35.799222 280.555287 
 127.218222 35.799222 287.013891 
 127.218333 35.799222 290.735250 
 127.218444 35.799222 294.781919 
 127.218556 35.799222 299.161246 
 127.217444 35.799333 270.372840 
 127.217556 35.799333 271.672682 
 127.217667 35.799333 273.294814 
 127.217778 35.799333 275.237692 
 127.218000 35.799333 280.095274 
 127.218222 35.799333 286.253421 
 127.218333 35.799333 289.824168 
 127.218444 35.799333 293.720125 
 127.218556 35.799333 297.948404 
 127.217556 35.799333 271.672682 
 127.217667 35.799333 273.294814 
 127.217778 35.799333 275.237692 
 127.217889 35.799333 277.505364 
 127.218111 35.799333 283.012485 
 127.218333 35.799333 289.824168 
 127.218444 35.799333 293.720125 
 127.218556 35.799333 297.948404 
 127.218667 35.799333 302.503375 
 127.217556 35.799444 271.876266 
 127.217667 35.799444 273.349249 
 127.217778 35.799444 275.142883 
 127.217889 35.799444 277.260980 
 127.218111 35.799444 282.468425 
 127.218333 35.799444 288.979571 
 127.218444 35.799444 292.724995 
 127.218556 35.799444 296.802406 
 127.218667 35.799444 301.206410 
 127.217556 35.799556 272.145913 
 127.217667 35.799556 273.469406 
 127.217778 35.799556 275.113454 
 127.217889 35.799556 277.081634 
 127.218111 35.799556 281.988720 
 127.218333 35.799556 288.198649 
 127.218444 35.799556 291.793200 
 127.218556 35.799556 295.719402 
 127.218667 35.799556 299.972099 
 127.217667 35.799556 273.469406 
 127.217778 35.799556 275.113454 
 127.217889 35.799556 277.081634 
 127.218000 35.799556 279.371859 
 127.218222 35.799556 284.929114 
 127.218444 35.799556 291.793200 
 127.218556 35.799556 295.719402 
 127.218667 35.799556 299.972099 
 127.218778 35.799556 304.558959 
 127.217667 35.799667 273.654966 
 127.217778 35.799667 275.149600 
 127.217889 35.799667 276.968037 
 127.218000 35.799667 279.108423 
 127.218222 35.799667 284.365243 
 127.218444 35.799667 290.928036 
 127.218556 35.799667 294.703209 
 127.218667 35.799667 298.804779 
 127.218778 35.799667 303.240177 
 127.217667 35.799778 273.906664 
 127.217778 35.799778 275.251542 
 127.217889 35.799778 276.919893 
 127.218000 35.799778 278.910100 
 127.218222 35.799778 283.865801 
 127.218444 35.799778 290.126619 
 127.218556 35.799778 293.750423 
 127.218667 35.799778 297.700526 
 127.218778 35.799778 301.984123 
 127.217667 35.799889 274.224334 
 127.217778 35.799889 275.419371 
 127.217889 35.799889 276.937552 
 127.218000 35.799889 278.777494 
 127.218222 35.799889 283.431911 
 127.218444 35.799889 289.390590 
 127.218556 35.799889 292.862944 
 127.218667 35.799889 296.661501 
 127.218778 35.799889 300.793215 
 127.217778 35.799889 275.419371 
 127.217889 35.799889 276.937552 
 127.218000 35.799889 278.777494 
 127.218111 35.799889 280.943080 
 127.218333 35.799889 286.248888 
 127.218556 35.799889 292.862944 
 127.218667 35.799889 296.661501 
 127.218778 35.799889 300.793215 
 127.218889 35.799889 305.252607 
 127.217778 35.800000 275.652723 
 127.217889 35.800000 277.020907 
 127.218000 35.800000 278.710760 
 127.218111 35.800000 280.725926 
 127.218333 35.800000 285.730377 
 127.218556 35.800000 292.042224 
 127.218667 35.800000 295.689414 
 127.218778 35.800000 299.669429 
 127.218889 35.800000 303.977024 
 127.217778 35.800111 275.952498 
 127.217889 35.800111 277.170343 
 127.218000 35.800111 278.709763 
 127.218111 35.800111 280.574168 
 127.218333 35.800111 285.276577 
 127.218556 35.800111 291.285532 
 127.218667 35.800111 294.781015 
 127.218778 35.800111 298.608989 
 127.218889 35.800111 302.764448 
 127.217889 35.800111 277.170343 
 127.218000 35.800111 278.709763 
 127.218111 35.800111 280.574168 
 127.218222 35.800111 282.761630 
 127.218444 35.800111 288.116061 
 127.218667 35.800111 294.781015 
 127.218778 35.800111 298.608989 
 127.218889 35.800111 302.764448 
 127.219000 35.800111 307.254905 
 127.217889 35.800222 277.385440 
 127.218000 35.800222 278.774602 
 127.218111 35.800222 280.488421 
 127.218222 35.800222 282.525205 
 127.218444 35.800222 287.577525 
 127.218667 35.800222 293.939519 
 127.218778 35.800222 297.615634 
 127.218889 35.800222 301.619139 
 127.219000 35.800222 305.957308 
 127.217889 35.800333 277.667036 
 127.218000 35.800333 278.905596 
 127.218111 35.800333 280.468486 
 127.218222 35.800333 282.354248 
 127.218444 35.800333 287.103775 
 127.218667 35.800333 293.162125 
 127.218778 35.800333 296.686039 
 127.218889 35.800333 300.537249 
 127.219000 35.800333 304.722790 
 127.218000 35.800333 278.905596 
 127.218111 35.800333 280.468486 
 127.218222 35.800333 282.354248 
 127.218333 35.800333 284.566836 
 127.218556 35.800333 289.970038 
 127.218778 35.800333 296.686039 
 127.218889 35.800333 300.537249 
 127.219000 35.800333 304.722790 
 127.219111 35.800333 309.237093 
 127.218000 35.800444 279.102391 
 127.218111 35.800444 280.514527 
 127.218222 35.800444 282.249444 
 127.218333 35.800444 284.310859 
 127.218556 35.800444 289.411200 
 127.218778 35.800444 295.823494 
 127.218889 35.800444 299.522592 
 127.219000 35.800444 303.555687 
 127.219111 35.800444 307.917450 
 127.218000 35.800556 279.365758 
 127.218111 35.800556 280.626797 
 127.218222 35.800556 282.210527 
 127.218333 35.800556 284.120425 
 127.218556 35.800556 288.917220 
 127.218778 35.800556 295.025124 
 127.218889 35.800556 298.571767 
 127.219000 35.800556 302.452076 
 127.219111 35.800556 306.660959 
 127.218111 35.800556 280.626797 
 127.218222 35.800556 282.210527 
 127.218333 35.800556 284.120425 
 127.218444 35.800556 286.354490 
 127.218667 35.800556 291.805590 
 127.218889 35.800556 298.571767 
 127.219000 35.800556 302.452076 
 127.219111 35.800556 306.660959 
 127.219222 35.800556 311.206012 
 127.218111 35.800667 280.805370 
 127.218222 35.800667 282.237828 
 127.218333 35.800667 283.996127 
 127.218444 35.800667 286.078502 
 127.218667 35.800667 291.225472 
 127.218889 35.800667 297.686674 
 127.219000 35.800667 301.414117 
 127.219111 35.800667 305.470042 
 127.219222 35.800667 309.861803 
 127.218111 35.800778 281.049864 
 127.218222 35.800778 282.331227 
 127.218333 35.800778 283.938104 
 127.218444 35.800778 285.868968 
 127.218667 35.800778 290.712168 
 127.218889 35.800778 296.868758 
 127.219000 35.800778 300.443519 
 127.219111 35.800778 304.346670 
 127.219222 35.800778 308.585324 
 127.218111 35.800889 281.361215 
 127.218222 35.800889 282.491139 
 127.218333 35.800889 283.946251 
 127.218444 35.800889 285.725260 
 127.218667 35.800889 290.264003 
 127.218889 35.800889 296.115298 
 127.219000 35.800889 299.537035 
 127.219111 35.800889 303.287069 
 127.219222 35.800889 307.372276 
 127.218222 35.800889 282.491139 
 127.218333 35.800889 283.946251 
 127.218444 35.800889 285.725260 
 127.218556 35.800889 287.831948 
 127.218778 35.800889 293.026233 
 127.219000 35.800889 299.537035 
 127.219111 35.800889 303.287069 
 127.219222 35.800889 307.372276 
 127.219333 35.800889 311.787240 
 127.218222 35.801000 282.717111 
 127.218333 35.801000 284.020635 
 127.218444 35.801000 285.647967 
 127.218556 35.801000 287.602652 
 127.218778 35.801000 292.492424 
 127.219000 35.801000 298.697873 
 127.219111 35.801000 302.294977 
 127.219222 35.801000 306.226921 
 127.219333 35.801000 310.488532 
 127.218222 35.801111 283.010016 
 127.218333 35.801111 284.161607 
 127.218444 35.801111 285.636919 
 127.218556 35.801111 287.439256 
 127.218778 35.801111 292.023828 
 127.219000 35.801111 297.923241 
 127.219111 35.801111 301.367071 
 127.219222 35.801111 305.145411 
 127.219333 35.801111 309.253327 
 127.218333 35.801111 284.161607 
 127.218444 35.801111 285.636919 
 127.218556 35.801111 287.439256 
 127.218667 35.801111 289.566784 
 127.218889 35.801111 294.807529 
 127.219111 35.801111 301.367071 
 127.219222 35.801111 305.145411 
 127.219333 35.801111 309.253327 
 127.219444 35.801111 313.698251 
 127.218333 35.801222 284.368778 
 127.218444 35.801222 285.692248 
 127.218556 35.801222 287.342418 
 127.218667 35.801222 289.317690 
 127.218889 35.801222 294.253182 
 127.219111 35.801222 300.506636 
 127.219222 35.801222 304.131557 
 127.219333 35.801222 308.085963 
 127.219444 35.801222 312.377048 
 127.218333 35.801333 284.642957 
 127.218444 35.801333 285.814241 
 127.218556 35.801333 287.311899 
 127.218667 35.801333 289.134572 
 127.218889 35.801333 293.764123 
 127.219111 35.801333 299.710802 
 127.219222 35.801333 303.181962 
 127.219333 35.801333 306.982518 
 127.219444 35.801333 311.119421 
 127.218444 35.801333 285.814241 
 127.218556 35.801333 287.311899 
 127.218667 35.801333 289.134572 
 127.218778 35.801333 291.286108 
 127.219000 35.801333 296.573493 
 127.219222 35.801333 303.181962 
 127.219333 35.801333 306.982518 
 127.219444 35.801333 311.119421 
 127.219556 35.801333 315.587173 
 127.218444 35.801444 286.002572 
 127.218556 35.801444 287.347898 
 127.218667 35.801444 289.018152 
 127.218778 35.801444 291.016944 
 127.219000 35.801444 295.998338 
 127.219222 35.801444 302.299984 
 127.219333 35.801444 305.946876 
 127.219444 35.801444 309.929784 
 127.219556 35.801444 314.243454 
 127.218444 35.801556 286.257986 
 127.218556 35.801556 287.450635 
 127.218667 35.801556 288.968126 
 127.218778 35.801556 290.813828 
 127.219000 35.801556 295.488544 
 127.219222 35.801556 301.482682 
 127.219333 35.801556 304.975567 
 127.219444 35.801556 308.804139 
 127.219556 35.801556 312.963382 
 127.218556 35.801556 287.450635 
 127.218667 35.801556 288.968126 
 127.218778 35.801556 290.813828 
 127.218889 35.801556 292.985836 
 127.219111 35.801556 298.319017 
 127.219333 35.801556 304.975567 
 127.219444 35.801556 308.804139 
 127.219556 35.801556 312.963382 
 127.219667 35.801556 317.460810 
 127.218556 35.801667 287.620199 
 127.218667 35.801667 288.984845 
 127.218778 35.801667 290.677377 
 127.218889 35.801667 292.696129 
 127.219111 35.801667 297.722057 
 127.219333 35.801667 304.070524 
 127.219444 35.801667 307.744681 
 127.219556 35.801667 311.749423 
 127.219667 35.801667 316.092017 
 127.218556 35.801778 287.856223 
 127.218667 35.801778 289.068205 
 127.218778 35.801778 290.607748 
 127.218889 35.801778 292.473426 
 127.219111 35.801778 297.192469 
 127.219333 35.801778 303.233226 
 127.219444 35.801778 306.753157 
 127.219556 35.801778 310.603584 
 127.219667 35.801778 314.791535 
 127.218556 35.801889 288.159613 
 127.218667 35.801889 289.218586 
 127.218778 35.801889 290.604795 
 127.218889 35.801889 292.317055 
 127.219111 35.801889 296.728526 
 127.219333 35.801889 302.460885 
 127.219444 35.801889 305.826245 
 127.219556 35.801889 309.522016 
 127.219667 35.801889 313.554981 
 127.218667 35.801889 289.218586 
 127.218778 35.801889 290.604795 
 127.218889 35.801889 292.317055 
 127.219000 35.801889 294.359037 
 127.219222 35.801889 299.430225 
 127.219444 35.801889 305.826245 
 127.219556 35.801889 309.522016 
 127.219667 35.801889 313.554981 
 127.219778 35.801889 317.919803 
 127.218667 35.802000 289.435567 
 127.218778 35.802000 290.668624 
 127.218889 35.802000 292.227648 
 127.219000 35.802000 294.116070 
 127.219222 35.802000 298.879644 
 127.219444 35.802000 304.967227 
 127.219556 35.802000 308.508530 
 127.219667 35.802000 312.386698 
 127.219778 35.802000 316.596637 
 127.218667 35.802111 289.719989 
 127.218778 35.802111 290.799549 
 127.218889 35.802111 292.204993 
 127.219000 35.802111 293.939509 
 127.219222 35.802111 298.394780 
 127.219444 35.802111 304.173238 
 127.219556 35.802111 307.559730 
 127.219667 35.802111 311.282759 
 127.219778 35.802111 315.337473 
 127.218778 35.802111 290.799549
[truncated: 1,106,996 more chars]
