# Supplementary material for: Terrain Referenced Navigation Using a Multilayer Radial Basis Function-Based Extreme Learning Machine
Source: Hindawi journal article supplement (doi:10.1155/2019/9142694), 2019-07-11
Supplement: f1 [file 9142694.f1.zip › 9142694_Supplementary information files/CompareMatchingResults_180909/ML_RBF_ELMTestResult.dat]

127.174444 35.700556 414.141528 
 127.174444 35.700667 414.168815 
 127.174444 35.700778 414.713130 
 127.174556 35.700778 414.068730 
 127.174556 35.700889 416.889931 
 127.174556 35.701000 422.466843 
 127.174556 35.701111 429.047049 
 127.174667 35.701111 425.748749 
 127.174667 35.701222 430.182844 
 127.174667 35.701333 431.817147 
 127.174667 35.701445 431.620979 
 127.174778 35.701445 427.737363 
 127.174778 35.701556 425.741822 
 127.174778 35.701667 422.484450 
 127.174778 35.701778 419.299372 
 127.174889 35.701889 408.458404 
 127.174889 35.702000 408.701442 
 127.174889 35.702111 407.230175 
 127.174889 35.702222 407.619363 
 127.175000 35.702222 404.337020 
 127.175000 35.702333 405.644484 
 127.175000 35.702445 407.233624 
 127.175000 35.702556 408.697051 
 127.175111 35.702556 407.300487 
 127.175111 35.702667 407.981501 
 127.175111 35.702778 412.268243 
 127.175111 35.702889 413.073935 
 127.175222 35.702889 416.330641 
 127.175222 35.703000 414.168804 
 127.175222 35.703111 409.863701 
 127.175222 35.703222 410.765582 
 127.175333 35.703222 404.826056 
 127.175333 35.703333 402.874402 
 127.175333 35.703445 401.962607 
 127.175333 35.703556 399.096942 
 127.175444 35.703556 395.727107 
 127.175444 35.703667 386.773273 
 127.175444 35.703778 374.865627 
 127.175444 35.703889 369.168720 
 127.175556 35.703889 367.516729 
 127.175556 35.704000 364.670903 
 127.175556 35.704111 365.293140 
 127.175556 35.704222 363.436687 
 127.175667 35.704222 362.974366 
 127.175667 35.704333 362.002854 
 127.175667 35.704444 362.946297 
 127.175667 35.704555 365.182098 
 127.175778 35.704555 365.273382 
 127.175778 35.704667 370.809949 
 127.175778 35.704778 375.159912 
 127.175778 35.704889 372.717029 
 127.175889 35.704889 365.242355 
 127.175889 35.705000 362.488493 
 127.175889 35.705111 355.265156 
 127.175889 35.705222 347.175603 
 127.176000 35.705222 347.594192 
 127.176000 35.705333 341.473349 
 127.176000 35.705444 338.741320 
 127.176000 35.705555 342.444152 
 127.176111 35.705555 335.982354 
 127.176111 35.705667 339.318701 
 127.176111 35.705778 343.789244 
 127.176111 35.705889 346.462360 
 127.176222 35.705889 342.664436 
 127.176222 35.706000 342.593574 
 127.176222 35.706111 341.434607 
 127.176222 35.706222 340.071638 
 127.176333 35.706222 333.509683 
 127.176333 35.706333 333.478316 
 127.176333 35.706444 333.500781 
 127.176333 35.706555 333.983423 
 127.176444 35.706555 331.122458 
 127.176444 35.706667 333.511219 
 127.176444 35.706778 332.541650 
 127.176444 35.706889 334.351207 
 127.176556 35.706889 332.548443 
 127.176556 35.707000 334.331189 
 127.176556 35.707111 335.982437 
 127.176556 35.707222 341.036879 
 127.176667 35.707222 342.659461 
 127.176667 35.707333 346.518357 
 127.176667 35.707444 350.750259 
 127.176667 35.707556 353.886771 
 127.176778 35.707556 352.177037 
 127.176778 35.707667 355.889233 
 127.176778 35.707778 362.260596 
 127.176778 35.707889 367.537168 
 127.176889 35.707889 362.019882 
 127.176889 35.708000 363.030479 
 127.176889 35.708111 362.489373 
 127.176889 35.708222 358.459791 
 127.177000 35.708222 356.685950 
 127.177000 35.708333 351.099590 
 127.177000 35.708444 347.899329 
 127.177111 35.708444 337.036203 
 127.177111 35.708556 337.191694 
 127.177111 35.708667 337.190288 
 127.177111 35.708778 341.036889 
 127.177222 35.708778 333.510151 
 127.177222 35.708889 335.933037 
 127.177222 35.709000 344.937244 
 127.177222 35.709111 349.385278 
 127.177333 35.709111 345.958008 
 127.177333 35.709222 346.413901 
 127.177333 35.709333 345.832585 
 127.177333 35.709444 343.800653 
 127.177444 35.709444 340.776933 
 127.177444 35.709556 341.452655 
 127.177444 35.709667 341.231518 
 127.177444 35.709778 342.589138 
 127.177556 35.709778 334.530645 
 127.177556 35.709889 334.532348 
 127.177556 35.710000 334.332947 
 127.177556 35.710111 335.938129 
 127.177667 35.710111 335.937141 
 127.177667 35.710222 343.060687 
 127.177667 35.710333 345.949895 
 127.177667 35.710444 344.940640 
 127.177778 35.710444 342.658677 
 127.177778 35.710556 339.323709 
 127.177778 35.710667 330.591300 
 127.177778 35.710778 322.939255 
 127.177889 35.710778 329.742580 
 127.177889 35.710889 321.701851 
 127.177889 35.711000 308.921804 
 127.178000 35.711111 299.414987 
 127.178000 35.711222 296.488580 
 127.178000 35.711333 297.584882 
 127.178111 35.711333 293.613378 
 127.178111 35.711444 293.622937 
 127.178111 35.711556 295.350081 
 127.178111 35.711667 301.382041 
 127.178222 35.711667 300.231899 
 127.178222 35.711778 303.360059 
 127.178222 35.711889 310.907438 
 127.178222 35.712000 313.537987 
 127.178333 35.712000 310.746973 
 127.178333 35.712111 310.746950 
 127.178333 35.712222 311.233527 
 127.178333 35.712333 308.304701 
 127.178444 35.712333 297.991395 
 127.178444 35.712444 293.439341 
 127.178444 35.712556 288.384493 
 127.178444 35.712667 281.068842 
 127.178556 35.712667 277.628555 
 127.178556 35.712778 271.087289 
 127.178556 35.712889 265.212486 
 127.178667 35.712889 258.490682 
 127.178667 35.713000 257.614398 
 127.178667 35.713111 256.248561 
 127.178667 35.713222 254.988272 
 127.178778 35.713222 254.621773 
 127.178778 35.713333 254.983414 
 127.178778 35.713444 254.983281 
 127.178778 35.713556 253.868524 
 127.178889 35.713556 253.950028 
 127.178889 35.713667 254.145767 
 127.178889 35.713778 253.701540 
 127.178889 35.713889 253.485078 
 127.179000 35.713889 253.908640 
 127.179000 35.714000 253.705049 
 127.179000 35.714111 253.674924 
 127.179111 35.714111 253.704352 
 127.179111 35.714222 253.619678 
 127.179111 35.714333 253.597980 
 127.179111 35.714445 252.436892 
 127.179222 35.714445 253.616927 
 127.179222 35.714556 252.434931 
 127.179222 35.714667 252.123879 
 127.179222 35.714778 250.855187 
 127.179333 35.714778 250.852391 
 127.179333 35.714889 250.214864 
 127.179333 35.715000 250.160361 
 127.179444 35.715000 250.208720 
 127.179444 35.715111 249.969749 
 127.179444 35.715222 249.896375 
 127.179444 35.715333 249.896864 
 127.179556 35.715333 250.209098 
 127.179556 35.715445 250.163977 
 127.179556 35.715556 250.171798 
 127.179556 35.715667 250.479969 
 127.179667 35.715667 250.810434 
 127.179667 35.715778 251.463707 
 127.179667 35.715889 252.414716 
 127.179778 35.715889 253.343137 
 127.179778 35.716000 253.616983 
 127.179778 35.716111 253.704055 
 127.179778 35.716222 254.149957 
 127.179889 35.716222 254.149929 
 127.179889 35.716333 254.632537 
 127.179889 35.716444 256.256661 
 127.179889 35.716556 258.573881 
 127.180000 35.716556 258.691500 
 127.180000 35.716667 260.513756 
 127.180000 35.716778 262.374880 
 127.180111 35.716778 259.800852 
 127.180111 35.716889 262.027231 
 127.180111 35.717000 261.882749 
 127.180111 35.717111 263.166428 
 127.180222 35.717111 260.515531 
 127.180222 35.717222 263.142399 
 127.180222 35.717333 263.989433 
 127.180222 35.717444 265.233413 
 127.180333 35.717444 263.494159 
 127.180333 35.717555 263.990570 
 127.180333 35.717667 265.233626 
 127.180444 35.717667 263.144775 
 127.180444 35.717778 263.634505 
 127.180444 35.717889 266.390942 
 127.180444 35.718000 266.875805 
 127.180556 35.718000 266.416684 
 127.180556 35.718111 266.995139 
 127.180556 35.718222 267.027652 
 127.180667 35.718222 265.149896 
 127.180667 35.718333 265.024350 
 127.180667 35.718444 266.382917 
 127.180667 35.718555 267.353156 
 127.180778 35.718555 267.002062 
 127.180778 35.718667 266.957544 
 127.180778 35.718778 268.678094 
 127.180889 35.718778 267.394852 
 127.180889 35.718889 266.950834 
 127.180889 35.719000 267.589884 
 127.180889 35.719111 269.321604 
 127.181000 35.719111 268.503482 
 127.181000 35.719222 269.307341 
 127.181000 35.719333 269.729962 
 127.181111 35.719444 270.308582 
 127.181111 35.719556 271.087165 
 127.181111 35.719667 271.107886 
 127.181222 35.719667 271.106685 
 127.181222 35.719778 271.960853 
 127.181222 35.719889 273.723082 
 127.181333 35.720000 274.685587 
 127.181333 35.720111 274.267704 
 127.181333 35.720222 274.745064 
 127.181444 35.720222 272.837530 
 127.181444 35.720333 274.821574 
 127.181444 35.720444 274.289472 
 127.181444 35.720556 275.118274 
 127.181556 35.720556 275.106993 
 127.181556 35.720667 276.057684 
 127.181556 35.720778 278.544008 
 127.181667 35.720778 276.506448 
 127.181667 35.720889 277.847082 
 127.181667 35.721000 278.676097 
 127.181778 35.721000 277.818525 
 127.181778 35.721111 278.497997 
 127.181778 35.721222 278.715026 
 127.181778 35.721333 279.808893 
 127.181889 35.721333 280.269756 
 127.181889 35.721444 279.861716 
 127.181889 35.721556 280.895763 
 127.182000 35.721556 280.719271 
 127.182000 35.721667 282.927977 
 127.182000 35.721778 283.101788 
 127.182000 35.721889 284.999999 
 127.182111 35.721889 286.251981 
 127.182111 35.722000 287.883118 
 127.182111 35.722111 288.401570 
 127.182222 35.722111 288.293455 
 127.182222 35.722222 289.682484 
 127.182222 35.722333 289.355377 
 127.182222 35.722444 292.784876 
 127.182333 35.722444 293.439889 
 127.182333 35.722556 293.946481 
 127.182333 35.722667 296.492917 
 127.182444 35.722667 295.368648 
 127.182444 35.722778 297.330714 
 127.182444 35.722889 298.462075 
 127.182444 35.723000 299.811482 
 127.182556 35.723000 303.675685 
 127.182556 35.723111 303.351841 
 127.182556 35.723222 306.826455 
 127.182667 35.723222 308.309794 
 127.182667 35.723333 308.515274 
 127.182667 35.723444 310.861161 
 127.182778 35.723444 316.991219 
 127.182778 35.723556 317.864566 
 127.182778 35.723667 321.851664 
 127.182778 35.723778 322.851679 
 127.182889 35.723778 325.714344 
 127.182889 35.723889 324.792105 
 127.182889 35.724000 326.812975 
 127.183000 35.724000 329.742606 
 127.183000 35.724111 330.589184 
 127.183000 35.724222 330.593497 
 127.183111 35.724333 334.338516 
 127.183111 35.724444 334.396226 
 127.183111 35.724556 333.500821 
 127.183222 35.724556 337.204813 
 127.183222 35.724667 335.976434 
 127.183222 35.724778 335.196261 
 127.183333 35.724778 339.269001 
 127.183333 35.724889 340.138409 
 127.183333 35.725000 343.886994 
 127.183333 35.725111 345.952181 
 127.183444 35.725111 347.208702 
 127.183444 35.725222 347.603216 
 127.183444 35.725333 349.835680 
 127.183556 35.725333 362.489018 
 127.183556 35.725444 363.013135 
 127.183556 35.725556 363.034293 
 127.183667 35.725556 365.976439 
 127.183667 35.725667 367.522001 
 127.183667 35.725778 369.171463 
 127.183667 35.725889 372.719116 
 127.183778 35.725889 383.358480 
 127.183778 35.726000 383.287124 
 127.183778 35.726111 383.360211 
 127.183889 35.726111 387.382005 
 127.183889 35.726222 391.193059 
 127.183889 35.726333 393.002231 
 127.184000 35.726333 396.183989 
 127.184000 35.726445 396.165149 
 127.184000 35.726556 399.173230 
 127.184000 35.726667 401.811152 
 127.184111 35.726667 405.644178 
 127.184111 35.726778 405.897748 
 127.184111 35.726889 405.914084 
 127.184222 35.726889 414.081608 
 127.184222 35.727000 414.713141 
 127.184222 35.727111 416.206136 
 127.184333 35.727111 420.322874 
 127.184333 35.727222 420.931160 
 127.184333 35.727333 422.479643 
 127.184444 35.727333 430.245834 
 127.184444 35.727445 431.476737 
 127.184444 35.727556 432.067522 
 127.184444 35.727667 434.542320 
 127.184556 35.727667 438.007947 
 127.184556 35.727778 439.821266 
 127.184556 35.727889 440.049931 
 127.184667 35.727889 444.713501 
 127.184667 35.728000 444.764866 
 127.184667 35.728111 446.291682 
 127.184778 35.728111 453.851329 
 127.184778 35.728222 455.479673 
 127.184778 35.728333 456.578916 
 127.184778 35.728445 457.676596 
 127.184889 35.728445 472.478969 
 127.184889 35.728556 478.172836 
 127.184889 35.728667 487.568437 
 127.185000 35.728667 485.995802 
 127.185000 35.728778 493.930403 
 127.185000 35.728889 496.394958 
 127.185111 35.728889 496.410237 
 127.185111 35.729000 508.150707 
 127.185111 35.729111 525.058183 
 127.185222 35.729111 520.514880 
 127.185222 35.729222 525.875764 
 127.185222 35.729333 527.372732 
 127.185222 35.729444 532.869435 
 127.185333 35.729444 532.853465 
 127.185333 35.729555 538.733084 
 127.185333 35.729667 544.155490 
 127.185444 35.729667 547.540487 
 127.185444 35.729778 547.545815 
 127.185444 35.729889 547.542881 
 127.185556 35.729889 553.618200 
 127.185556 35.730000 552.604400 
 127.185556 35.730111 547.539855 
 127.185667 35.730111 547.536463 
 127.185667 35.730222 538.957686 
 127.185667 35.730333 538.734190 
 127.185667 35.730444 535.105436 
 127.185778 35.730444 532.972327 
 127.185778 35.730555 520.698662 
 127.185778 35.730667 515.816077 
 127.185889 35.730667 512.512834 
 127.185889 35.730778 508.331143 
 127.185889 35.730889 504.018862 
 127.186000 35.730889 493.308652 
 127.186000 35.731000 485.175571 
 127.186000 35.731111 481.562073 
 127.186111 35.731111 480.680927 
 127.186111 35.731222 479.069718 
 127.186111 35.731333 474.226069 
 127.186222 35.731333 465.652257 
 127.186222 35.731444 461.734377 
 127.186222 35.731555 460.107710 
 127.186222 35.731667 455.235962 
 127.186333 35.731667 455.719992 
 127.186333 35.731778 451.779400 
 127.186333 35.731889 448.826821 
 127.186444 35.731889 453.026672 
 127.186444 35.732000 451.770574 
 127.186444 35.732111 449.426238 
 127.186556 35.732111 455.236582 
 127.186556 35.732222 451.777300 
 127.186556 35.732333 448.069581 
 127.186667 35.732333 453.163324 
 127.186667 35.732444 450.890759 
 127.186667 35.732556 450.873271 
 127.186778 35.732556 455.447554 
 127.186778 35.732667 455.234063 
 127.186778 35.732778 456.622130 
 127.186889 35.732889 458.427238 
 127.186889 35.733000 456.508646 
 127.186889 35.733111 456.623876 
 127.187000 35.733111 462.256933 
 127.187000 35.733222 464.143223 
 127.187000 35.733333 464.059433 
 127.187111 35.733333 469.263641 
 127.187111 35.733444 471.755907 
 127.187111 35.733556 473.896212 
 127.187222 35.733556 478.157202 
 127.187222 35.733667 479.859632 
 127.187222 35.733778 481.567268 
 127.187333 35.733778 485.233118 
 127.187333 35.733889 485.990689 
 127.187333 35.734000 487.772591 
 127.187444 35.734000 494.125921 
 127.187444 35.734111 496.471511 
 127.187444 35.734222 500.898815 
 127.187556 35.734222 503.984221 
 127.187556 35.734333 507.996298 
 127.187556 35.734444 512.408222 
 127.187556 35.734556 515.376618 
 127.187667 35.734556 512.612430 
 127.187667 35.734667 512.468503 
 127.187667 35.734778 507.975272 
 127.187778 35.734778 487.559611 
 127.187778 35.734889 481.607723 
 127.187778 35.735000 479.861968 
 127.187889 35.735000 478.168189 
 127.187889 35.735111 463.798193 
 127.187889 35.735222 444.752654 
 127.188000 35.735222 439.813777 
 127.188000 35.735333 436.067363 
 127.188000 35.735444 431.194232 
 127.188111 35.735444 417.573413 
 127.188111 35.735556 413.028888 
 127.188111 35.735667 410.210314 
 127.188222 35.735667 405.900031 
 127.188222 35.735778 405.643081 
 127.188222 35.735889 405.844995 
 127.188333 35.735889 404.337433 
 127.188333 35.736000 410.651582 
 127.188333 35.736111 420.324376 
 127.188333 35.736222 430.251802 
 127.188444 35.736222 428.903998 
 127.188444 35.736333 430.279326 
 127.188444 35.736444 429.159220 
 127.188556 35.736444 416.195762 
 127.188556 35.736556 414.481175 
 127.188556 35.736667 414.176502 
 127.188667 35.736667 407.313320 
 127.188667 35.736778 410.691041 
 127.188667 35.736889 416.954366 
 127.188778 35.736889 409.807848 
 127.188778 35.737000 421.759901 
 127.188778 35.737111 437.043974 
 127.188889 35.737111 425.872329 
 127.188889 35.737222 448.070716 
 127.188889 35.737333 462.278229 
 127.189000 35.737333 460.556546 
 127.189000 35.737444 463.796429 
 127.189000 35.737556 465.617874 
 127.189111 35.737556 457.674231 
 127.189111 35.737667 455.809503 
 127.189111 35.737778 453.008537 
 127.189222 35.737778 450.860876 
 127.189222 35.737889 445.848979 
 127.189222 35.738000 430.191439 
 127.189333 35.738111 413.121655 
 127.189333 35.738222 413.076661 
 127.189333 35.738333 414.713148 
 127.189444 35.738333 409.707658 
 127.189444 35.738444 413.621789 
 127.189444 35.738556 425.706927 
 127.189556 35.738556 420.300690 
 127.189556 35.738667 434.281239 
 127.189556 35.738778 448.071185 
 127.189667 35.738778 445.010175 
 127.189667 35.738889 448.136100 
 127.189667 35.739000 451.163717 
 127.189778 35.739000 437.168742 
 127.189778 35.739111 439.827542 
 127.189778 35.739222 440.072932 
 127.189889 35.739222 437.070770 
 127.189889 35.739333 439.823140 
 127.189889 35.739445 441.154817 
 127.190000 35.739445 437.823489 
 127.190000 35.739556 440.064392 
 127.190000 35.739667 442.545107 
 127.190111 35.739667 431.826932 
 127.190111 35.739778 440.064909 
 127.190111 35.739889 451.163057 
 127.190222 35.739889 439.824906 
 127.190222 35.740000 448.874073 
 127.190222 35.740111 459.519243 
 127.190333 35.740111 453.005564 
 127.190333 35.740222 462.363034 
 127.190333 35.740333 469.948302 
 127.190444 35.740333 469.267880 
 127.190444 35.740445 480.775620 
 127.190444 35.740556 489.347141 
 127.190556 35.740556 478.178876 
 127.190556 35.740667 484.929702 
 127.190556 35.740778 496.155746 
 127.190556 35.740889 507.965802 
 127.190667 35.740889 497.636461 
 127.190667 35.741000 503.569279 
 127.190667 35.741111 504.047445 
 127.190778 35.741111 485.984672 
 127.190778 35.741222 487.562980 
 127.190778 35.741333 494.191545 
 127.190889 35.741333 485.174700 
 127.190889 35.741445 496.424082 
 127.190889 35.741556 507.818271 
 127.191000 35.741556 500.711801 
 127.191000 35.741667 504.002001 
 127.191000 35.741778 504.075031 
 127.191111 35.741778 488.210315 
 127.191111 35.741889 494.019130 
 127.191111 35.742000 503.918280 
 127.191222 35.742000 504.053360 
 127.191222 35.742111 508.213561 
 127.191222 35.742222 510.132128 
 127.191333 35.742222 509.962737 
 127.191333 35.742333 509.849245 
 127.191333 35.742444 508.145473 
 127.191444 35.742444 512.386471 
 127.191444 35.742555 504.499991 
 127.191444 35.742667 496.420015 
 127.191556 35.742667 504.059479 
 127.191556 35.742778 500.984156 
 127.191556 35.742889 496.336353 
 127.191667 35.742889 496.477809 
 127.191667 35.743000 487.992557 
 127.191667 35.743111 481.341914 
 127.191778 35.743111 487.405027 
 127.191778 35.743222 478.174814 
 127.191778 35.743333 471.439946 
 127.191889 35.743333 471.755523 
 127.191889 35.743444 469.237425 
 127.191889 35.743555 465.677542 
 127.192000 35.743555 464.173807 
 127.192000 35.743667 457.675092 
 127.192000 35.743778 449.630146 
 127.192111 35.743778 453.004383 
 127.192111 35.743889 442.590227 
 127.192111 35.744000 437.073338 
 127.192222 35.744000 441.127926 
 127.192222 35.744111 437.834956 
 127.192222 35.744222 434.264624 
 127.192333 35.744222 437.850761 
 127.192333 35.744333 436.347785 
 127.192333 35.744444 434.276478 
 127.192444 35.744444 437.845493 
 127.192444 35.744556 437.957415 
 127.192444 35.744667 440.064622 
 127.192556 35.744778 448.859800 
 127.192556 35.744889 448.396623 
 127.192556 35.745000 448.201820 
 127.192667 35.745000 449.796730 
 127.192667 35.745111 451.161814 
 127.192667 35.745222 451.774190 
 127.192778 35.745222 458.428265 
 127.192778 35.745333 461.812701 
 127.192778 35.745444 465.668477 
 127.192889 35.745444 468.271792 
 127.192889 35.745556 469.266448 
 127.192889 35.745667 469.284793 
 127.193000 35.745667 470.051900 
 127.193000 35.745778 471.059235 
 127.193000 35.745889 476.464068 
 127.193111 35.745889 470.060707 
 127.193111 35.746000 472.387688 
 127.193111 35.746111 475.639119 
 127.193222 35.746111 469.266266 
 127.193222 35.746222 469.401262 
 127.193222 35.746333 470.052183 
 127.193333 35.746333 469.253257 
 127.193333 35.746444 469.258721 
 127.193333 35.746556 469.263315 
 127.193444 35.746556 458.438793 
 127.193444 35.746667 453.008414 
 127.193444 35.746778 451.120858 
 127.193556 35.746778 441.594711 
 127.193556 35.746889 442.566018 
 127.193556 35.747000 448.569064 
 127.193667 35.747000 444.805453 
 127.193667 35.747111 450.860678 
 127.193667 35.747222 460.131308 
 127.193778 35.747222 456.523817 
 127.193778 35.747333 460.187915 
 127.193778 35.747444 462.278551 
 127.193889 35.747444 456.625018 
 127.193889 35.747556 456.573961 
 127.193889 35.747667 456.639357 
 127.194000 35.747667 451.780046 
 127.194000 35.747778 456.373194 
 127.194000 35.747889 461.529399 
 127.194111 35.747889 465.666697 
 127.194111 35.748000 471.754069 
 127.194111 35.748111 474.404410 
 127.194222 35.748111 472.466500 
 127.194222 35.748222 473.771744 
 127.194222 35.748333 474.433656 
 127.194333 35.748333 478.601624 
 127.194333 35.748444 479.859652 
 127.194333 35.748556 479.874888 
 127.194444 35.748556 479.860008 
 127.194444 35.748667 476.465582 
 127.194444 35.748778 467.667103 
 127.194556 35.748778 472.477183 
 127.194556 35.748889 464.188199 
 127.194556 35.749000 458.429306 
 127.194667 35.749000 457.608193 
 127.194667 35.749111 450.864594 
 127.194667 35.749222 441.173476 
 127.194778 35.749333 423.548461 
 127.194778 35.749444 405.951524 
 127.194778 35.749556 393.974127 
 127.194889 35.749556 392.032673 
 127.194889 35.749667 384.372275 
 127.194889 35.749778 379.820667 
 127.195000 35.749778 385.843836 
 127.195000 35.749889 380.829375 
 127.195000 35.750000 374.766216 
 127.195111 35.750000 377.003429 
 127.195111 35.750111 375.162608 
 127.195111 35.750222 372.647050 
 127.195222 35.750222 386.773720 
 127.195222 35.750333 379.991391 
 127.195222 35.750444 379.088917 
 127.195333 35.750444 383.139748 
 127.195333 35.750556 379.092300 
 127.195333 35.750667 372.719783 
 127.195444 35.750667 385.829195 
 127.195444 35.750778 379.431001 
 127.195444 35.750889 376.894827 
 127.195556 35.750889 379.352765 
 127.195556 35.751000 379.100253 
 127.195556 35.751111 376.884922 
 127.195667 35.751111 376.971483 
 127.195667 35.751222 372.062136 
 127.195667 35.751333 362.010754 
 127.195778 35.751333 368.123329 
 127.195778 35.751444 349.835490 
 127.195778 35.751556 335.198643 
 127.195889 35.751556 341.130197 
 127.195889 35.751667 334.502661 
 127.195889 35.751778 325.198040 
 127.196000 35.751778 329.723921 
 127.196000 35.751889 323.164364 
 127.196000 35.752000 315.192901 
 127.196111 35.752000 317.773614 
 127.196111 35.752111 313.334034 
 127.196111 35.752222 311.116366 
 127.196222 35.752222 315.589192 
 127.196222 35.752333 313.524442 
 127.196222 35.752445 314.009786 
 127.196333 35.752445 313.258176 
 127.196333 35.752556 313.263430 
 127.196333 35.752667 313.257718 
 127.196444 35.752667 309.403944 
 127.196444 35.752778 308.515886 
 127.196444 35.752889 308.503399 
 127.196556 35.752889 305.732187 
 127.196556 35.753000 304.852888 
 127.196556 35.753111 303.580550 
 127.196667 35.753111 289.498013 
 127.196667 35.753222 287.154127 
 127.196667 35.753333 283.101959 
 127.196667 35.753445 278.527032 
 127.196778 35.753445 269.502743 
 127.196778 35.753556 266.384581 
 127.196778 35.753667 264.656682 
 127.196889 35.753667 261.030388 
 127.196889 35.753778 258.539475 
 127.196889 35.753889 256.949068 
 127.197000 35.753889 250.034793 
 127.197000 35.754000 248.999542 
 127.197000 35.754111 245.929138 
 127.197111 35.754111 238.237993 
 127.197111 35.754222 236.557554 
 127.197111 35.754333 234.948094 
 127.197222 35.754333 232.734195 
 127.197222 35.754444 230.421369 
 127.197222 35.754555 227.868749 
 127.197333 35.754555 220.027331 
 127.197333 35.754667 218.327432 
 127.197333 35.754778 217.021879 
 127.197444 35.754778 212.562727 
 127.197444 35.754889 207.449412 
 127.197444 35.755000 203.496682 
 127.197556 35.755000 202.014245 
 127.197556 35.755111 200.413033 
 127.197556 35.755222 199.482915 
 127.197667 35.755222 197.937354 
 127.197667 35.755333 197.907849 
 127.197667 35.755444 197.917274 
 127.197778 35.755444 200.790174 
 127.197778 35.755555 200.517031 
 127.197778 35.755667 200.479229 
 127.197889 35.755667 204.673157 
 127.197889 35.755778 205.717630 
 127.197889 35.755889 205.752322 
 127.198000 35.755889 211.974921 
 127.198000 35.756000 210.771846 
 127.198000 35.756111 209.264683 
 127.198111 35.756111 213.924930 
 127.198111 35.756222 212.606784 
 127.198111 35.756333 213.358868 
 127.198222 35.756333 217.681440 
 127.198222 35.756444 217.681151 
 127.198222 35.756555 217.681466 
 127.198333 35.756555 222.051774 
 127.198333 35.756667 222.061112 
 127.198333 35.756778 223.262318 
 127.198444 35.756778 230.785743 
 127.198444 35.756889 230.857579 
 127.198444 35.757000 231.156920 
 127.198556 35.757000 236.717339 
 127.198556 35.757111 238.026238 
 127.198556 35.757222 240.257222 
 127.198667 35.757333 245.888395 
 127.198667 35.757444 244.273936 
 127.198667 35.757556 241.740056 
 127.198778 35.757556 245.986200 
 127.198778 35.757667 241.160066 
 127.198778 35.757778 228.275379 
 127.198889 35.757778 231.136645 
 127.198889 35.757889 212.575698 
 127.198889 35.758000 202.013081 
 127.199000 35.758000 200.518367 
 127.199000 35.758111 194.039695 
 127.199000 35.758222 190.348305 
 127.199111 35.758222 187.867951 
 127.199111 35.758333 186.106416 
 127.199111 35.758444 182.877727 
 127.199222 35.758444 183.543904 
 127.199222 35.758556 175.642759 
 127.199222 35.758667 169.220341 
 127.199333 35.758667 175.631492 
 127.199333 35.758778 171.919755 
 127.199333 35.758889 168.350872 
 127.199444 35.758889 169.888636 
 127.199444 35.759000 162.185685 
 127.199444 35.759111 156.707511 
 127.199556 35.759111 162.294813 
 127.199556 35.759222 156.665578 
 127.199556 35.759333 151.085321 
 127.199667 35.759333 158.469005 
 127.199667 35.759444 147.476561 
 127.199667 35.759556 141.087895 
 127.199778 35.759556 142.699295 
 127.199778 35.759667 138.963683 
 127.199778 35.759778 135.563571 
 127.199889 35.759778 137.006616 
 127.199889 35.759889 133.659271 
 127.199889 35.760000 130.646723 
 127.200000 35.760000 131.806735 
 127.200000 35.760111 129.503771 
 127.200000 35.760222 127.772966 
 127.200111 35.760222 128.181609 
 127.200111 35.760333 125.414047 
 127.200111 35.760444 120.589567 
 127.200222 35.760556 119.470349 
 127.200222 35.760667 115.784923 
 127.200222 35.760778 114.352280 
 127.200333 35.760778 115.239396 
 127.200333 35.760889 114.343921 
 127.200333 35.761000 114.573371 
 127.200444 35.761000 114.344212 
 127.200444 35.761111 112.085015 
 127.200444 35.761222 110.510103 
 127.200556 35.761222 110.076147 
 127.200556 35.761333 109.573717 
 127.200556 35.761444 108.729581 
 127.200667 35.761444 108.699443 
 127.200667 35.761556 108.130904 
 127.200667 35.761667 107.582095 
 127.200778 35.761667 106.356136 
 127.200778 35.761778 106.361309 
 127.200778 35.761889 106.573012 
 127.200889 35.761889 105.740085 
 127.200889 35.762000 106.287316 
 127.200889 35.762111 106.356236 
 127.201000 35.762111 103.496334 
 127.201000 35.762222 104.130491 
 127.201000 35.762333 105.502794 
 127.201111 35.762333 104.133064 
 127.201111 35.762444 104.573946 
 127.201111 35.762556 105.179500 
 127.201222 35.762556 104.089740 
 127.201222 35.762667 103.502130 
 127.201222 35.762778 103.484436 
 127.201333 35.762778 102.653994 
 127.201333 35.762889 102.705874 
 127.201333 35.763000 102.706961 
 127.201444 35.763000 100.326681 
 127.201444 35.763111 99.531660 
 127.201444 35.763222 99.506377 
 127.201444 35.763333 99.533181 
 127.201556 35.763333 100.183543 
 127.201556 35.763444 98.303137 
 127.201556 35.763556 98.240017 
 127.201667 35.763556 98.253900 
 127.201667 35.763667 97.901561 
 127.201667 35.763778 96.851230 
 127.201778 35.763778 95.855991 
 127.201778 35.763889 94.751097 
 127.201778 35.764000 94.697845 
 127.201889 35.764000 94.674845 
 127.201889 35.764111 94.756491 
 127.201889 35.764222 95.428084 
 127.202000 35.764222 95.316784 
 127.202000 35.764333 95.433769 
 127.202000 35.764445 95.433709 
 127.202111 35.764445 95.434412 
 127.202111 35.764556 95.428842 
 127.202111 35.764667 94.727462 
 127.202222 35.764667 94.380589 
 127.202222 35.764778 94.371587 
 127.202222 35.764889 94.260400 
 127.202333 35.764889 94.371509 
 127.202333 35.765000 94.255262 
 127.202333 35.765111 92.424404 
 127.202444 35.765111 92.153008 
 127.202444 35.765222 90.743017 
 127.202444 35.765333 90.649757 
 127.202556 35.765445 90.649721 
 127.202556 35.765556 90.649713 
 127.202556 35.765667 90.649867 
 127.202667 35.765667 90.650151 
 127.202667 35.765778 90.658087 
 127.202667 35.765889 91.161861 
 127.202778 35.765889 92.288521 
 127.202778 35.766000 96.507637 
 127.202778 35.766111 99.803375 
 127.202889 35.766111 101.388061 
 127.202889 35.766222 102.654630 
 127.202889 35.766333 103.458861 
 127.203000 35.766333 104.137593 
 127.203000 35.766445 104.136109 
 127.203000 35.766556 104.134497 
 127.203111 35.766556 104.568070 
 127.203111 35.766667 104.132035 
 127.203111 35.766778 103.496110 
 127.203222 35.766778 103.493665 
 127.203222 35.766889 102.159068 
 127.203222 35.767000 97.736232 
 127.203333 35.767000 91.012966 
 127.203333 35.767111 89.411617 
 127.203333 35.767222 89.065516 
 127.203444 35.767222 89.047381 
 127.203444 35.767333 87.341954 
 127.203444 35.767444 86.628154 
 127.203444 35.767555 84.990414 
 127.203556 35.767555 84.988865 
 127.203556 35.767667 84.732403 
 127.203556 35.767778 84.656606 
 127.203667 35.767778 83.173919 
 127.203667 35.767889 82.331846 
 127.203667 35.768000 81.455157 
 127.203778 35.768000 84.499952 
 127.203778 35.768111 84.708790 
 127.203778 35.768222 83.343393 
 127.203889 35.768222 83.356999 
 127.203889 35.768333 82.327772 
 127.203889 35.768444 80.327838 
 127.204000 35.768444 79.951627 
 127.204000 35.768555 79.751852 
 127.204000 35.768667 79.764643 
 127.204111 35.768667 80.011999 
 127.204111 35.768778 79.998658 
 127.204111 35.768889 79.998574 
 127.204222 35.768889 80.012310 
 127.204222 35.769000 79.999562 
 127.204222 35.769111 79.998887 
 127.204333 35.769111 80.002183 
 127.204333 35.769222 80.001414 
 127.204333 35.769333 80.010116 
 127.204333 35.769444 80.013919 
 127.204444 35.769444 80.012577 
 127.204444 35.769555 80.027094 
 127.204444 35.769667 80.070145 
 127.204556 35.769667 79.998528 
 127.204556 35.769778 80.013482 
 127.204556 35.769889 80.014061 
 127.204667 35.769889 80.013658 
 127.204667 35.770000 80.013366 
 127.204667 35.770111 79.998633 
 127.204778 35.770111 79.998119 
 127.204778 35.770222 79.989157 
 127.204778 35.770333 79.766324 
 127.204889 35.770333 79.990218 
 127.204889 35.770444 79.998322 
 127.204889 35.770556 80.000547 
 127.205000 35.770556 80.012989 
 127.205000 35.770667 80.013988 
 127.205000 35.770778 80.014594 
 127.205111 35.770778 80.013716 
 127.205111 35.770889 80.013565 
 127.205111 35.771000 80.003353 
 127.205111 35.771111 79.998778 
 127.205222 35.771111 80.011915 
 127.205222 35.771222 80.010858 
 127.205222 35.771333 80.008268 
 127.205333 35.771333 79.999236 
 127.205333 35.771444 79.998530 
 127.205333 35.771556 79.998500 
 127.205444 35.771556 80.013766 
 127.205444 35.771667 80.053331 
 127.205444 35.771778 80.070343 
 127.205556 35.771778 80.248588 
 127.205556 35.771889 80.317936 
 127.205556 35.772000 80.797037 
 127.205667 35.772000 80.931037 
 127.205667 35.772111 80.931068 
 127.205667 35.772222 80.931130 
 127.205778 35.772222 80.931280 
 127.205778 35.772333 80.931384 
 127.205778 35.772444 80.931329 
 127.205889 35.772444 80.931251 
 127.205889 35.772556 80.930991 
 127.205889 35.772667 80.923554 
 127.205889 35.772778 80.925008 
 127.206000 35.772778 80.931516 
 127.206000 35.772889 81.109937 
 127.206000 35.773000 81.455172 
 127.206111 35.773000 80.936331 
 127.206111 35.773111 81.455678 
 127.206111 35.773222 82.331808 
 127.206222 35.773222 82.189257 
 127.206222 35.773333 83.173322 
 127.206222 35.773444 83.188073 
 127.206333 35.773444 83.187776 
 127.206333 35.773556 83.203716 
 127.206333 35.773667 83.337950 
 127.206444 35.773667 83.187831 
 127.206444 35.773778 83.188738 
 127.206444 35.773889 83.191016 
 127.206556 35.773889 83.342532 
 127.206556 35.774000 84.725701 
 127.206556 35.774111 86.739033 
 127.206667 35.774222 100.326707 
 127.206667 35.774333 102.703338 
 127.206667 35.774444 104.101756 
 127.206778 35.774444 108.683924 
 127.206778 35.774556 110.079343 
 127.206778 35.774667 111.781358 
 127.206889 35.774667 119.470446 
 127.206889 35.774778 120.071783 
 127.206889 35.774889 122.105761 
 127.207000 35.774889 127.364825 
 127.207000 35.775000 133.627055 
 127.207000 35.775111 137.009693 
 127.207111 35.775111 140.129038 
 127.207111 35.775222 141.447627 
 127.207111 35.775333 140.428634 
 127.207222 35.775333 143.666122 
 127.207222 35.775444 144.970288 
 127.207222 35.775556 148.059723 
 127.207333 35.775556 150.405646 
 127.207333 35.775667 157.533059 
 127.207333 35.775778 169.047454 
 127.207333 35.775889 173.864486 
 127.207444 35.775889 177.639636 
 127.207444 35.776000 178.481286 
 127.207444 35.776111 180.487832 
 127.207556 35.776111 181.750990 
 127.207556 35.776222 183.680919 
 127.207556 35.776333 186.789057 
 127.207667 35.776333 192.071969 
 127.207667 35.776444 190.540079 
 127.207667 35.776556 183.606893 
 127.207778 35.776556 187.035073 
 127.207778 35.776667 172.213977 
 127.207778 35.776778 160.704256 
 127.207889 35.776778 163.960620 
 127.207889 35.776889 156.718664 
 127.207889 35.777000 154.685128 
 127.208000 35.777000 156.719574 
 127.208000 35.777111 154.598659 
 127.208000 35.777222 151.117773 
 127.208000 35.777333 148.865762 
 127.208111 35.777333 153.430199 
 127.208111 35.777445 152.506233 
 127.208111 35.777556 151.910123 
 127.208222 35.777556 159.419302 
 127.208222 35.777667 158.343784 
 127.208222 35.777778 155.542081 
 127.208333 35.777778 162.318035 
 127.208333 35.777889 161.974204 
 127.208333 35.778000 163.512107 
 127.208444 35.778000 169.220576 
 127.208444 35.778111 168.082104 
 127.208444 35.778222 169.207855 
 127.208556 35.778222 174.093269 
 127.208556 35.778333 177.642555 
 127.208556 35.778445 192.576769 
 127.208667 35.778556 207.449302 
 127.208667 35.778667 209.050275 
 127.208667 35.778778 209.261858 
 127.208778 35.778778 213.925639 
 127.208778 35.778889 214.696111 
 127.208778 35.779000 218.279904 
 127.208889 35.779000 225.533951 
 127.208889 35.779111 226.972862 
 127.208889 35.779222 225.477408 
 127.209000 35.779222 227.610184 
 127.209000 35.779333 217.352284 
 127.209000 35.779444 205.432116 
 127.209111 35.779444 201.818389 
 127.209111 35.779555 197.894822 
 127.209111 35.779667 194.867322 
 127.209222 35.779667 196.805679 
 127.209222 35.779778 182.846094 
 127.209222 35.779889 169.587395 
 127.209222 35.780000 164.894557 
 127.209333 35.780000 170.825504 
 127.209333 35.780111 166.689420 
 127.209333 35.780222 164.816619 
 127.209444 35.780222 166.081148 
 127.209444 35.780333 164.260607 
 127.209444 35.780444 168.483278 
 127.209556 35.780444 170.825997 
 127.209556 35.780555 175.675692 
 127.209556 35.780667 178.828572 
 127.209667 35.780667 183.544021 
 127.209667 35.780778 182.307393 
 127.209667 35.780889 178.895114 
 127.209778 35.780889 184.242059 
 127.209778 35.781000 183.585130 
 127.209778 35.781111 185.383977 
 127.209889 35.781111 187.156268 
 127.209889 35.781222 188.786004 
 127.209889 35.781333 194.238935 
 127.209889 35.781444 199.485996 
 127.210000 35.781444 209.299329 
 127.210000 35.781555 209.460826 
 127.210000 35.781667 209.142527 
 127.210111 35.781667 208.330651 
 127.210111 35.781778 196.085828 
 127.210111 35.781889 182.569767 
 127.210222 35.781889 181.705796 
 127.210222 35.782000 177.637118 
 127.210222 35.782111 175.399833 
 127.210333 35.782111 173.706429 
 127.210333 35.782222 169.880990 
 127.210333 35.782333 169.888603 
 127.210444 35.782333 169.876045 
 127.210444 35.782444 172.653238 
 127.210444 35.782556 177.636291 
 127.210556 35.782556 185.384068 
 127.210556 35.782667 186.049862 
 127.210556 35.782778 187.284531 
 127.210556 35.782889 188.752750 
 127.210667 35.782889 194.881368 
 127.210667 35.783000 195.564915 
 127.210667 35.783111 194.866549 
 127.210778 35.783111 204.666443 
 127.210778 35.783222 207.555322 
 127.210778 35.783333 214.388173 
 127.210889 35.783333 214.388402 
 127.210889 35.783444 220.026830 
 127.210889 35.783556 222.227469 
 127.211000 35.783556 227.006262 
 127.211000 35.783667 228.727707 
 127.211000 35.783778 232.627800 
 127.211111 35.783778 239.631492 
 127.211111 35.783889 241.161777 
 127.211111 35.784000 241.738358 
 127.211111 35.784111 241.614887 
 127.211222 35.784111 234.173104 
 127.211222 35.784222 230.786278 
 127.211222 35.784333 230.421227 
 127.211333 35.784333 224.023374 
 127.211333 35.784444 221.251269 
 127.211333 35.784556 216.945496 
 127.211444 35.784556 209.159514 
 127.211444 35.784667 209.474858 
 127.211444 35.784778 208.331245 
 127.211556 35.784778 196.051642 
 127.211556 35.784889 194.009470 
 127.211556 35.785000 190.642214 
 127.211667 35.785000 190.551641 
 127.211667 35.785111 185.384676 
 127.211667 35.785222 175.026770 
 127.211667 35.785333 168.071013 
 127.211778 35.785333 166.099493 
 127.211778 35.785444 164.728321 
 127.211778 35.785556 159.616604 
 127.211889 35.785556 149.786653 
 127.211889 35.785667 146.903972 
 127.211889 35.785778 142.133434 
 127.212000 35.785778 142.559662 
 127.212000 35.785889 138.544210 
 127.212000 35.786000 135.564164 
 127.212111 35.786000 141.367937 
 127.212111 35.786111 143.544549 
 127.212111 35.786222 144.959330 
 127.212222 35.786222 144.962179 
 127.212222 35.786333 148.795910 
 127.212222 35.786444 156.658492 
 127.212222 35.786556 169.478179 
 127.212333 35.786556 166.737142 
 127.212333 35.786667 171.452713 
 127.212333 35.786778 175.395680 
 127.212444 35.786778 173.773257 
 127.212444 35.786889 180.418567 
 127.212444 35.787000 185.387114 
 127.212556 35.787000 185.393176 
 127.212556 35.787111 189.418065 
 127.212556 35.787222 194.868087 
 127.212667 35.787222 194.696323 
 127.212667 35.787333 204.667996 
 127.212667 35.787444 213.929512 
 127.212778 35.787444 202.660551 
 127.212778 35.787556 209.128584 
 127.212778 35.787667 213.907628 
 127.212778 35.787778 214.502688 
 127.212889 35.787778 210.335553 
 127.212889 35.787889 209.194214 
 127.212889 35.788000 207.633988 
 127.213000 35.788000 201.691158 
 127.213000 35.788111 202.787483 
 127.213000 35.788222 202.671195 
 127.213111 35.788222 196.810225 
 127.213111 35.788333 197.944895 
 127.213111 35.788444 199.468266 
 127.213222 35.788444 196.052896 
 127.213222 35.788556 197.951645 
 127.213222 35.788667 201.749031 
 127.213333 35.788778 194.045654 
 127.213333 35.788889 194.866708 
 127.213333 35.789000 196.086098 
 127.213444 35.789000 194.865393 
 127.213444 35.789111 201.758535 
 127.213444 35.789222 211.930739 
 127.213556 35.789222 218.217200 
 127.213556 35.789333 225.797428 
 127.213556 35.789445 228.534264 
 127.213667 35.789445 235.245975 
 127.213667 35.789556 236.514282 
 127.213667 35.789667 237.743507 
 127.213778 35.789667 250.853690 
 127.213778 35.789778 252.377818 
 127.213778 35.789889 254.621718 
 127.213778 35.790000 256.894091 
 127.213889 35.790000 260.921414 
 127.213889 35.790111 260.974661 
 127.213889 35.790222 261.519384 
 127.214000 35.790222 260.007316 
 127.214000 35.790333 257.636753 
 127.214000 35.790445 253.617025 
 127.214111 35.790445 245.954533 
 127.214111 35.790556 237.743546 
 127.214111 35.790667 230.561606 
 127.214222 35.790667 226.991924 
 127.214222 35.790778 223.415733 
 127.214222 35.790889 221.246591 
 127.214333 35.790889 217.362353 
 127.214333 35.791000 220.563878 
 127.214333 35.791111 228.249869 
 127.214333 35.791222 237.743507 
 127.214444 35.791222 237.734168 
 127.214444 35.791333 247.454487 
 127.214444 35.791445 251.464425 
 127.214556 35.791445 248.721013 
 127.214556 35.791556 254.988119 
 127.214556 35.791667 261.645102 
 127.214667 35.791667 262.374275 
 127.214667 35.791778 269.502602 
 127.214667 35.791889 274.253332 
 127.214778 35.791889 267.559096 
 127.214778 35.792000 269.624499 
 127.214778 35.792111 268.710560 
 127.214778 35.792222 266.380085 
 127.214889 35.792222 258.937662 
 127.214889 35.792333 261.933171 
 127.214889 35.792444 266.382790 
 127.215000 35.792444 256.117268 
 127.215000 35.792555 265.030662 
 127.215000 35.792667 270.308291 
 127.215111 35.792667 269.809013 
 127.215111 35.792778 267.398819 
 127.215111 35.792889 262.378321 
 127.215222 35.792889 259.403459 
 127.215222 35.793000 253.910018 
 127.215222 35.793111 251.478066 
 127.215333 35.793111 240.222365 
 127.215333 35.793222 241.647613 
 127.215333 35.793333 245.469338 
 127.215333 35.793444 248.807182 
 127.215444 35.793444 245.815829 
 127.215444 35.793555 245.464067 
 127.215444 35.793667 241.516945 
 127.215556 35.793667 232.458614 
 127.215556 35.793778 225.539379 
 127.215556 35.793889 222.017947 
 127.215667 35.793889 224.245173 
 127.215667 35.794000 228.775480 
 127.215667 35.794111 236.717298 
 127.215778 35.794111 240.250280 
 127.215778 35.794222 245.463966 
 127.215778 35.794333 250.855036 
 127.215778 35.794444 256.206916 
 127.215889 35.794444 253.714347 
 127.215889 35.794555 258.829543 
 127.215889 35.794667 258.374637 
 127.216000 35.794667 256.949278 
 127.216000 35.794778 255.360248 
 127.216000 35.794889 253.305919 
 127.216111 35.794889 245.894202 
 127.216111 35.795000 244.274498 
 127.216111 35.795111 244.141075 
 127.216222 35.795111 242.387118 
 127.216222 35.795222 242.807688 
 127.216222 35.795333 245.929125 
 127.216333 35.795333 250.163595 
 127.216333 35.795444 256.890241 
 127.216333 35.795556 263.665236 
 127.216333 35.795667 266.958342 
 127.216444 35.795667 270.857652 
 127.216444 35.795778 271.145328 
 127.216444 35.795889 275.102317 
 127.216556 35.795889 289.572024 
 127.216556 35.796000 290.678853 
 127.216556 35.796111 292.009318 
 127.216667 35.796111 297.602726 
 127.216667 35.796222 303.291234 
 127.216667 35.796333 314.279731 
 127.216778 35.796333 315.064953 
 127.216778 35.796444 321.731198 
 127.216778 35.796556 332.534563 
 127.216778 35.796667 340.135376 
 127.216889 35.796667 339.323721 
 127.216889 35.796778 344.754329 
 127.216889 35.796889 345.856183 
 127.217000 35.796889 328.334141 
 127.217000 35.797000 326.575304 
 127.217000 35.797111 325.210222 
 127.217111 35.797111 320.079705 
 127.217111 35.797222 318.082651 
 127.217111 35.797333 317.413988 
 127.217222 35.797333 305.761311 
 127.217222 35.797444 309.470279 
 127.217222 35.797556 311.809946 
 127.217222 35.797667 313.538650 
 127.217333 35.797667 309.344781 
 127.217333 35.797778 311.109859 
 127.217333 35.797889 314.504208 
 127.217444 35.797889 308.850291 
 127.217444 35.798000 308.764570 
 127.217444 35.798111 311.231566 
 127.217556 35.798111 307.959543 
 127.217556 35.798222 305.907818 
 127.217556 35.798333 305.763651 
 127.217667 35.798333 299.418041 
 127.217667 35.798444 300.839635 
 127.217667 35.798556 304.866980 
 127.217778 35.798667 308.613605 
 127.217778 35.798778 315.585393 
 127.217778 35.798889 317.991369 
 127.217889 35.798889 310.974020 
 127.217889 35.799000 310.863231 
 127.217889 35.799111 314.349657 
 127.218000 35.799111 308.921418 
 127.218000 35.799222 315.057269 
 127.218000 35.799333 327.290949 
 127.218111 35.799333 317.444838 
 127.218111 35.799444 322.915881 
 127.218111 35.799556 333.071000 
 127.218222 35.799556 323.168027 
 127.218222 35.799667 328.999202 
 127.218222 35.799778 335.987622 
 127.218222 35.799889 342.588385 
 127.218333 35.799889 342.659663 
 127.218333 35.800000 351.276032 
 127.218333 35.800111 362.004171 
 127.218444 35.800111 363.018271 
 127.218444 35.800222 370.816775 
 127.218444 35.800333 375.126243 
 127.218556 35.800333 376.993957 
 127.218556 35.800444 379.808490 
 127.218556 35.800556 379.541606 
 127.218667 35.800556 368.127578 
 127.218667 35.800667 362.489294 
 127.218667 35.800778 359.711123 
 127.218667 35.800889 356.708303 
 127.218778 35.800889 354.757361 
 127.218778 35.801000 348.488626 
 127.218778 35.801111 344.934092 
 127.218889 35.801111 335.202538 
 127.218889 35.801222 335.217895 
 127.218889 35.801333 336.083686 
 127.219000 35.801333 339.303631 
 127.219000 35.801444 345.552115 
 127.219000 35.801556 354.412332 
 127.219111 35.801556 354.415192 
 127.219111 35.801667 358.202529 
 127.219111 35.801778 365.110244 
 127.219111 35.801889 375.172451 
 127.219222 35.801889 379.753839 
 127.219222 35.802000 391.981883 
 127.219222 35.802111 401.826703 
 127.219333 35.802111 396.313444 
 127.219333 35.802222 402.477659 
 127.219333 35.802333 407.533918 
 127.219444 35.802333 393.775922 
 127.219444 35.802445 403.995380 
 127.219444 35.802556 409.544393 
 127.219556 35.802556 402.761311 
 127.219556 35.802667 405.644584 
 127.219556 35.802778 403.995562 
 127.219556 35.802889 400.219382 
 127.219667 35.802889 396.145543 
 127.219667 35.803000 393.131599 
 127.219667 35.803111 387.380590 
 127.219778 35.803111 391.586345 
 127.219778 35.803222 384.524512 
 127.219778 35.803333 372.263288 
 127.219889 35.803333 373.994821 
 127.219889 35.803445 371.956512 
 127.219889 35.803556 368.731369 
 127.220000 35.803556 374.984468 
 127.220000 35.803667 372.628952 
 127.220000 35.803778 372.102231 
 127.220000 35.803889 368.114463 
 127.220111 35.803889 370.808557 
 127.220111 35.804000 362.481573 
 127.220111 35.804111 349.836750 
 127.220222 35.804111 351.095241 
 127.220222 35.804222 345.944401 
 127.220222 35.804333 342.444167 
 127.220333 35.804333 352.177363 
 127.220333 35.804444 352.958549 
 127.220333 35.804556 355.089340 
 127.220444 35.804556 358.048515 
 127.220444 35.804667 356.838539 
 127.220444 35.804778 354.163886 
 127.220444 35.804889 347.894540 
 127.220556 35.804889 343.781936 
 127.220556 35.805000 332.235385 
 127.220556 35.805111 323.798977 
 127.220667 35.805111 328.929196 
 127.220667 35.805222 324.411050 
 127.220667 35.805333 322.910560 
 127.220778 35.805333 325.212671 
 127.220778 35.805444 330.467915 
 127.220778 35.805555 337.841751 
 127.220889 35.805555 340.057125 
 127.220889 35.805667 342.659447 
 127.220889 35.805778 342.659491 
 127.220889 35.805889 341.075460 
 127.221000 35.805889 334.378520 
 127.221000 35.806000 329.742750 
 127.221000 35.806111 324.792152 
 127.221111 35.806111 324.859382 
 127.221111 35.806222 322.854756 
 127.221111 35.806333 317.425568 
 127.221222 35.806333 317.405967 
 127.221222 35.806444 311.158298 
 127.221222 35.806555 308.500234 
 127.221333 35.806555 313.530254 
 127.221333 35.806667 316.929065 
 127.221333 35.806778 317.817640 
 127.221333 35.806889 320.783001 
 127.221444 35.806889 320.990044 
 127.221444 35.807000 317.869618 
 127.221444 35.807111 310.862297 
 127.221556 35.807111 308.854730 
 127.221556 35.807222 294.017089 
 127.221556 35.807333 281.306169 
 127.221667 35.807333 285.836963 
 127.221667 35.807444 277.633791 
 127.221667 35.807556 276.502465 
 127.221778 35.807556 280.837635 
 127.221778 35.807667 284.578704 
 127.221778 35.807778 286.359335 
 127.221778 35.807889 287.466256 
 127.221889 35.807889 293.610418 
 127.221889 35.808000 295.724551 
 127.221889 35.808111 303.333652 
 127.222000 35.808111 307.229735 
 127.222000 35.808222 311.114125 
 127.222000 35.808333 319.629270 
 127.222111 35.808333 322.907326 
 127.222111 35.808444 334.532449 
 127.222111 35.808556 344.754792 
 127.222222 35.808556 341.409227 
 127.222222 35.808667 347.599431 
 127.222222 35.808778 354.403979 
 127.222222 35.808889 361.642030 
 127.222333 35.808889 372.262225 
 127.222333 35.809000 374.767207 
 127.222333 35.809111 375.001452 
 127.222444 35.809111 378.529602 
 127.222444 35.809222 374.770792 
 127.222444 35.809333 370.882506 
 127.222556 35.809333 385.006866 
 127.222556 35.809444 379.992824 
 127.222556 35.809556 376.893470 
 127.222667 35.809556 379.993670 
 127.222667 35.809667 379.368647 
 127.222667 35.809778 380.055446 
 127.222667 35.809889 380.977963 
 127.222778 35.809889 375.172184 
 127.222778 35.810000 372.547400 
 127.222778 35.810111 365.147252 
 127.222889 35.810111 356.685493 
 127.222889 35.810222 351.096127 
 127.222889 35.810333 346.417546 
 127.223000 35.810333 332.550239 
 127.223000 35.810444 329.742216 
 127.223000 35.810556 327.280724 
 127.223111 35.810556 324.796820 
 127.223111 35.810667 321.403100 
 127.223111 35.810778 312.474818 
 127.223111 35.810889 308.209037 
 127.223222 35.810889 301.622209 
 127.223222 35.811000 301.422547 
 127.223222 35.811111 300.038765 
 127.223333 35.811111 293.610308 
 127.223333 35.811222 292.053728 
 127.223333 35.811333 290.832326 
 127.223444 35.811333 288.384577 
 127.223444 35.811444 285.033568 
 127.223444 35.811556 280.714978 
 127.223556 35.811556 274.740876 
 127.223556 35.811667 274.772048 
 127.223556 35.811778 272.204937 
 127.223667 35.811889 262.184234 
 127.223667 35.812000 258.773419 
 127.223667 35.812111 254.868922 
 127.223778 35.812111 253.690701 
 127.223778 35.812222 250.163864 
 127.223778 35.812333 245.997996 
 127.223889 35.812333 241.215884 
 127.223889 35.812444 239.928742 
 127.223889 35.812556 237.743535 
 127.224000 35.812556 237.736270 
 127.224000 35.812667 235.131597 
 127.224000 35.812778 230.785907 
 127.224111 35.812889 227.432164 
 127.224111 35.813000 225.637466 
 127.224111 35.813111 223.438630 
 127.224222 35.813111 224.530788 
 127.224222 35.813222 222.396540 
 127.224222 35.813333 221.248366 
 127.224333 35.813333 227.258091 
 127.224333 35.813444 225.540073 
 127.224333 35.813556 224.237432 
 127.224444 35.813556 225.537176 
 127.224444 35.813667 223.893234 
 127.224444 35.813778 224.244012 
 127.224556 35.813778 225.635938 
 127.224556 35.813889 225.541563 
 127.224556 35.814000 225.542191 
 127.224556 35.814111 226.618148 
 127.224667 35.814111 228.276520 
 127.224667 35.814222 230.787596 
 127.224667 35.814333 231.616973 
 127.224778 35.814333 236.696365 
 127.224778 35.814445 236.693684 
 127.224778 35.814556 234.947940 
 127.224889 35.814556 243.225659 
 127.224889 35.814667 245.790933 
 127.224889 35.814778 249.038244 
 127.225000 35.814778 253.622589 
 127.225000 35.814889 254.622200 
 127.225000 35.815000 257.482951 
 127.225000 35.815111 258.754323 
 127.225111 35.815111 260.152326 
 127.225111 35.815222 256.949231 
 127.225111 35.815333 253.392241 
 127.225222 35.815333 256.250845 
 127.225222 35.815445 250.921492 
 127.225222 35.815556 248.984876 
 127.225333 35.815556 248.806735 
 127.225333 35.815667 247.194949 
 127.225333 35.815778 247.196595 
 127.225444 35.815778 247.122095 
 127.225444 35.815889 244.253376 
 127.225444 35.816000 237.868153 
 127.225444 35.816111 234.946100 
 127.225556 35.816111 237.969028 
 127.225556 35.816222 236.707133 
 127.225556 35.816333 231.628980 
 127.225667 35.816333 233.392946 
 127.225667 35.816445 227.610191 
 127.225667 35.816556 220.697440 
 127.225778 35.816556 225.527030 
 127.225778 35.816667 220.778893 
 127.225778 35.816778 217.814609 
 127.225889 35.816778 220.642740 
 127.225889 35.816889 218.284627 
 127.225889 35.817000 220.467407 
 127.225889 35.817111 224.245148 
 127.226000 35.817111 223.898163 
 127.226000 35.817222 232.968956 
 127.226000 35.817333 242.665970 
 127.226111 35.817333 247.920613 
 127.226111 35.817444 253.703247 
 127.226111 35.817555 258.218824 
 127.226222 35.817555 265.138617 
 127.226222 35.817667 269.323013 
 127.226222 35.817778 276.010912 
 127.226333 35.817778 279.775702 
 127.226333 35.817889 289.180563 
 127.226333 35.818000 293.860887 
 127.226444 35.818000 298.145585 
 127.226444 35.818111 298.991158 
 127.226444 35.818222 298.135950 
 127.226444 35.818333 295.349898 
 127.226556 35.818333 300.002272 
 127.226556 35.818444 298.473361 
 127.226556 35.818555 293.688180 
 127.226667 35.818555 293.842967 
 127.226667 35.818667 281.204978 
 127.226667 35.818778 271.038896 
 127.226778 35.818778 269.572588 
 127.226778 35.818889 267.395061 
 127.226778 35.819000 265.026788 
 127.226889 35.819000 263.491760 
 127.226889 35.819111 259.981325 
 127.226889 35.819222 252.335972 
 127.226889 35.819333 245.925608 
 127.227000 35.819333 252.436938 
 127.227000 35.819444 248.999474 
 127.227000 35.819555 245.929336 
 127.227111 35.819555 248.806089 
 127.227111 35.819667 246.032863 
 127.227111 35.819778 244.276260 
 127.227222 35.819778 242.664219 
 127.227222 35.819889 240.255017 
 127.227222 35.820000 237.765804 
 127.227333 35.820000 239.695048 
 127.227333 35.820111 239.506775 
 127.227333 35.820222 241.159853 
 127.227444 35.820222 244.254995 
 127.227444 35.820333 251.701863 
 127.227444 35.820444 262.027215 
 127.227444 35.820556 265.072810 
 127.227556 35.820556 262.373234 
 127.227556 35.820667 266.760975 
 127.227556 35.820778 269.210471 
 127.227667 35.820778 277.572806 
 127.227667 35.820889 284.579212 
 127.227667 35.821000 289.181894 
 127.227778 35.821000 290.676681 
 127.227778 35.821111 295.349510 
 127.227778 35.821222 298.143042 
 127.227889 35.821222 306.799157 
 127.227889 35.821333 309.486286 
 127.227889 35.821444 314.501998 
 127.227889 35.821556 317.786029 
 127.228000 35.821556 319.665809 
 127.228000 35.821667 324.801408 
 127.228000 35.821778 342.636108 
 127.228111 35.821778 349.831786 
 127.228111 35.821889 357.316520 
 127.228111 35.822000 358.420361 
 127.228222 35.822000 357.904075 
 127.228222 35.822111 353.294240 
 127.228222 35.822222 344.741762 
 127.228333 35.822222 352.184855 
 127.228333 35.822333 341.233025 
 127.228333 35.822444 328.923410 
 127.228444 35.822444 334.343370 
 127.228444 35.822556 328.346081 
 127.228444 35.822667 321.319795 
 127.228444 35.822778 314.275750 
 127.228556 35.822778 313.262293 
 127.228556 35.822889 310.863482 
 127.228556 35.823000 308.503735 
 127.228667 35.823000 314.450161 
 127.228667 35.823111 302.862495 
 127.228667 35.823222 293.952786 
 127.228778 35.823222 293.610053 
 127.228778 35.823333 290.674986 
 127.228778 35.823444 286.202590 
 127.228889 35.823444 282.666364 
 127.228889 35.823556 274.376051 
 127.228889 35.823667 262.735252 
 127.228889 35.823778 256.477632 
 127.229000 35.823778 254.978065 
 127.229000 35.823889 249.390407 
 127.229000 35.824000 241.162059 
 127.229111 35.824000 244.270049 
 127.229111 35.824111 233.423723 
 127.229111 35.824222 226.947747 
 127.229222 35.824222 230.446921 
 127.229222 35.824333 226.570706 
 127.229222 35.824444 224.244687 
 127.229333 35.824444 227.261460 
 127.229333 35.824556 227.544690 
 127.229333 35.824667 227.869585 
 127.229444 35.824667 236.509884 
 127.229444 35.824778 241.169945 
 127.229444 35.824889 244.266165 
 127.229444 35.825000 248.414157 
 127.229556 35.825000 249.897186 
 127.229556 35.825111 256.254858 
 127.229556 35.825222 263.141794 
 127.229667 35.825222 267.392416 
 127.229667 35.825333 268.730483 
 127.229667 35.825444 267.027050 
 127.229778 35.825444 276.713559 
 127.229778 35.825556 279.981080 
 127.229778 35.825667 283.511364 
 127.229889 35.825667 284.445256 
 127.229889 35.825778 290.796659 
 127.229889 35.825889 302.456188 
 127.230000 35.826000 313.539517 
 127.230000 35.826111 313.252265 
 127.230000 35.826222 311.123247 
 127.230111 35.826222 302.568584 
 127.230111 35.826333 297.633974 
 127.230111 35.826444 291.329458 
 127.230222 35.826444 289.185170 
 127.230222 35.826556 278.714934 
 127.230222 35.826667 267.571754 
 127.230333 35.826667 263.144272 
 127.230333 35.826778 258.631077 
 127.230333 35.826889 256.643592 
 127.230444 35.826889 250.477374 
 127.230444 35.827000 246.003905 
 127.230444 35.827111 237.743509 
 127.230444 35.827222 232.422414 
 127.230556 35.827222 236.535287 
 127.230556 35.827333 233.336270 
 127.230556 35.827445 233.378145 
 127.230667 35.827445 239.692155 
 127.230667 35.827556 239.709227 
 127.230667 35.827667 241.171647 
 127.230778 35.827667 242.357153 
 127.230778 35.827778 244.289210 
 127.230778 35.827889 248.416604 
 127.230889 35.827889 256.882240 
 127.230889 35.828000 258.656916 
 127.230889 35.828111 259.392455 
 127.231000 35.828111 262.760154 
 127.231000 35.828222 262.184238 
 127.231000 35.828333 263.431985 
 127.231000 35.828445 263.912705 
 127.231111 35.828445 268.699920 
 127.231111 35.828556 268.726242 
 127.231111 35.828667 268.731489 
 127.231222 35.828667 271.106926 
 127.231222 35.828778 271.087306 
 127.231222 35.828889 274.743587 
 127.231333 35.828889 288.384512 
 127.231333 35.829000 298.183649 
 127.231333 35.829111 308.527411 
 127.231444 35.829111 302.575915 
 127.231444 35.829222 312.442913 
 127.231444 35.829333 319.641290 
 127.231556 35.829333 332.478443 
 127.231556 35.829444 342.659455 
 127.231556 35.829556 346.312150 
 127.231556 35.829667 347.898233 
 127.231667 35.829667 349.835428 
 127.231667 35.829778 344.591231 
 127.231667 35.829889 332.684595 
 127.231778 35.829889 340.541852 
 127.231778 35.830000 326.814654 
 127.231778 35.830111 317.405939 
 127.231889 35.830111 313.538803 
 127.231889 35.830222 299.689061 
 127.231889 35.830333 292.013913 
 127.232000 35.830333 292.014446 
 127.232000 35.830444 287.060852 
 127.232000 35.830555 284.338077 
 127.232111 35.830667 284.479847 
 127.232111 35.830778 282.930433 
 127.232111 35.830889 280.466276 
 127.232222 35.830889 284.579167 
 127.232222 35.831000 282.922355 
 127.232222 35.831111 280.397295 
 127.232333 35.831111 278.681626 
 127.232333 35.831222 275.910077 
 127.232333 35.831333 270.857430 
 127.232444 35.831333 273.540249 
 127.232444 35.831444 270.310704 
 127.232444 35.831555 267.398885 
 127.232556 35.831555 274.610313 
 127.232556 35.831667 274.688953 
 127.232556 35.831778 273.539950 
 127.232556 35.831889 273.540579 
 127.232667 35.831889 275.995313 
 127.232667 35.832000 276.862179 
 127.232667 35.832111 277.332328 
 127.232778 35.832111 282.795058 
 127.232778 35.832222 281.225861 
 127.232778 35.832333 279.776047 
 127.232889 35.832333 282.682669 
 127.232889 35.832444 279.189640 
 127.232889 35.832556 271.082906 
 127.233000 35.832556 269.507675 
 127.233000 35.832667 263.036113 
 127.233000 35.832778 256.840944 
 127.233111 35.832778 263.986739 
 127.233111 35.832889 261.951462 
 127.233111 35.833000 261.763305 
 127.233111 35.833111 262.187479 
 127.233222 35.833111 269.697745 
 127.233222 35.833222 272.563492 
 127.233222 35.833333 274.243061 
 127.233333 35.833333 275.975430 
 127.233333 35.833444 278.529079 
 127.233333 35.833556 282.670534 
 127.233444 35.833556 287.084737 
 127.233444 35.833667 287.849819 
 127.233444 35.833778 285.760942 
 127.233556 35.833778 292.777335 
 127.233556 35.833889 289.354992 
 127.233556 35.834000 287.344422 
 127.233667 35.834000 290.674520 
 127.233667 35.834111 289.364466 
 127.233667 35.834222 289.656037 
 127.233667 35.834333 291.216380 
 127.233778 35.834333 300.822672 
 127.233778 35.834444 303.354723 
 127.233778 35.834556 308.291943 
 127.233889 35.834556 310.746966 
 127.233889 35.834667 313.539228 
 127.233889 35.834778 317.533699 
 127.234000 35.834778 324.806267 
 127.234000 35.834889 327.276621 
 127.234000 35.835000 330.592099 
 127.234111 35.835000 343.059379 
 127.234111 35.835111 345.951941 
 127.234111 35.835222 347.896879 
 127.234222 35.835222 345.952204 
 127.234222 35.835333 345.947983 
 127.234222 35.835444 345.947448 
 127.234222 35.835556 345.941501 
 127.234333 35.835556 330.507950 
 127.234333 35.835667 329.742288 
 127.234333 35.835778 332.478155 
 127.234444 35.835778 327.338060 
 127.234444 35.835889 327.305116 
 127.234444 35.836000 329.004900 
 127.234556 35.836000 326.814024 
 127.234556 35.836111 325.454669 
 127.234556 35.836222 320.064279 
 127.234667 35.836222 317.406768 
 127.234667 35.836333 304.433262 
 127.234667 35.836444 293.440523 
 127.234778 35.836444 295.305837 
 127.234778 35.836556 288.378917 
 127.234778 35.836667 284.479834 
 127.234778 35.836778 280.468499 
 127.234889 35.836778 276.852578 
 127.234889 35.836889 263.294168 
 127.234889 35.837000 252.123345 
 127.235000 35.837000 257.723079 
 127.235000 35.837111 248.204698 
 127.235000 35.837222 244.249555 
 127.235111 35.837222 244.274136 
 127.235111 35.837333 242.731380 
 127.235111 35.837444 242.109174 
 127.235222 35.837444 230.785789 
 127.235222 35.837556 227.868657 
 127.235222 35.837667 227.872969 
 127.235333 35.837667 224.530123 
 127.235333 35.837778 226.619405 
 127.235333 35.837889 230.557789 
 127.235333 35.838000 231.689663 
 127.235444 35.838000 226.664857 
 127.235444 35.838111 227.006517 
 127.235444 35.838222 227.609879 
 127.235556 35.838222 221.247027 
 127.235556 35.838333 225.537986 
 127.235556 35.838444 228.274715 
 127.235667 35.838444 225.825561 
 127.235667 35.838556 227.054966 
 127.235667 35.838667 224.527278 
 127.235778 35.838667 214.388467 
 127.235778 35.838778 205.208616 
 127.235778 35.838889 199.488134 
 127.235778 35.839000 196.652160 
 127.235889 35.839000 203.512863 
 127.235889 35.839111 201.759186 
 127.235889 35.839222 196.018829 
 127.236000 35.839222 182.577244 
 127.236000 35.839333 175.790155 
 127.236000 35.839445 175.513309 
 127.236111 35.839445 172.097389 
 127.236111 35.839556 172.073866 
 127.236111 35.839667 172.734155 
 127.236222 35.839667 167.614875 
 127.236222 35.839778 166.634832 
 127.236222 35.839889 167.618236 
 127.236333 35.839889 164.521919 
 127.236333 35.840000 164.630105 
 127.236333 35.840111 174.557521 
 127.236333 35.840222 182.570663 
 127.236444 35.840222 177.730505 
 127.236444 35.840333 181.687245 
 127.236444 35.840445 180.424608 
 127.236556 35.840445 177.950175 
 127.236556 35.840556 175.593167 
 127.236556 35.840667 168.385087 
 127.236667 35.840667 163.501828 
 127.236667 35.840778 162.299047 
 127.236667 35.840889 160.345377 
 127.236778 35.840889 156.721181 
 127.236778 35.841000 151.115344 
 127.236778 35.841111 145.525884 
 127.236889 35.841111 140.124605 
 127.236889 35.841222 138.961501 
 127.236889 35.841333 138.538549 
 127.236889 35.841445 137.005240 
 127.237000 35.841445 130.640500 
 127.237000 35.841556 130.637699 
 127.237000 35.841667 131.807580 
 127.237111 35.841667 127.903489 
 127.237111 35.841778 126.294752 
 127.237111 35.841889 123.885296 
 127.237222 35.841889 122.673623 
 127.237222 35.842000 121.507331 
 127.237222 35.842111 120.560074 
 127.237333 35.842111 119.488852 
 127.237333 35.842222 117.149158 
 127.237333 35.842333 115.764183 
 127.237444 35.842333 114.409008 
 127.237444 35.842444 112.628711 
 127.237444 35.842555 112.037876 
 127.237444 35.842667 111.762692 
 127.237556 35.842667 109.591634 
 127.237556 35.842778 108.887782 
 127.237556 35.842889 108.707554 
 127.237667 35.842889 105.399039 
 127.237667 35.843000 104.135717 
 127.237667 35.843111 104.180638 
 127.237778 35.843111 103.229638 
 127.237778 35.843222 103.446862 
 127.237778 35.843333 103.799312 
 127.237889 35.843333 102.653712 
 127.237889 35.843444 103.486152 
 127.237889 35.843555 103.553622 
 127.238000 35.843555 99.505484 
 127.238000 35.843667 99.505510 
 127.238000 35.843778 100.184630 
 127.238000 35.843889 97.901548 
 127.238111 35.843889 96.506392 
 127.238111 35.844000 94.646780 
 127.238111 35.844111 94.269920 
 127.238222 35.844111 92.204264 
 127.238222 35.844222 90.648392 
 127.238222 35.844333 89.944181 
 127.238333 35.844333 87.344580 
 127.238333 35.844444 86.754597 
 127.238333 35.844555 86.623192 
 127.238444 35.844555 84.989043 
 127.238444 35.844667 84.726884 
 127.238444 35.844778 83.329787 
 127.238556 35.844778 83.313949 
 127.238556 35.844889 83.187762 
 127.238556 35.845000 83.150552 
 127.238556 35.845111 82.332175 
 127.238667 35.845111 82.331761 
 127.238667 35.845222 82.046445 
 127.238667 35.845333 81.498625 
 127.238778 35.845333 82.330943 
 127.238778 35.845444 81.457040 
 127.238778 35.845556 80.801351 
 127.238889 35.845556 80.385602 
 127.238889 35.845667 80.013640 
 127.238889 35.845778 79.993387 
 127.239000 35.845778 80.246744 
 127.239000 35.845889 80.070264 
 127.239000 35.846000 80.013477 
 127.239111 35.846000 80.000593 
 127.239111 35.846111 79.989453 
 127.239111 35.846222 79.989210 
 127.239111 35.846333 79.989808 
 127.239222 35.846333 79.998452 
 127.239222 35.846444 80.003190 
 127.239222 35.846556 80.013638 
 127.239333 35.846556 80.014784 
 127.239333 35.846667 79.998569 
 127.239333 35.846778 79.765263 
 127.239444 35.846778 79.774132 
 127.239444 35.846889 79.456288 
 127.239444 35.847000 78.736002 
 127.239556 35.847000 78.733774 
 127.239556 35.847111 78.652448 
 127.239556 35.847222 77.822574 
 127.239667 35.847222 78.593058 
 127.239667 35.847333 77.954785 
 127.239667 35.847444 77.771668 
 127.239667 35.847556 77.758178 
 127.239778 35.847556 77.763684 
 127.239778 35.847667 77.756045 
 127.239778 35.847778 77.232608 
 127.239889 35.847778 77.767035 
 127.239889 35.847889 77.667620 
 127.239889 35.848000 77.230291 
 127.240000 35.848000 77.757667 
 127.240000 35.848111 77.290752 
 127.240000 35.848222 77.227657 
 127.240111 35.848222 77.692926 
 127.240111 35.848333 77.230198 
 127.240111 35.848444 76.450609 
 127.240222 35.848444 77.754373 
 127.240222 35.848556 77.216105 
 127.240222 35.848667 75.887919 
 127.240333 35.848778 75.841801 
 127.240333 35.848889 75.162428 
 127.240333 35.849000 74.782676 
 127.240444 35.849000 74.902019 
 127.240444 35.849111 74.770507 
 127.240444 35.849222 74.770138 
 127.240556 35.849222 76.449699 
 127.240556 35.849333 76.907336 
 127.240556 35.849444 77.213885 
 127.240667 35.849444 79.080704 
 127.240667 35.849556 80.248056 
 127.240667 35.849667 80.958740 
 127.240778 35.849667 83.188059 
 127.240778 35.849778 83.203360 
 127.240778 35.849889 84.725578 
 127.240889 35.850000 89.899701 
 127.240889 35.850111 90.651729 
 127.240889 35.850222 94.220131 
 127.241000 35.850222 98.243561 
 127.241000 35.850333 106.241046 
 127.241000 35.850444 112.082908 
 127.241111 35.850444 109.425595 
 127.241111 35.850556 114.569922 
 127.241111 35.850667 114.573094 
 127.241222 35.850667 112.349128 
 127.241222 35.850778 111.798824 
 127.241222 35.850889 106.354450 
 127.241333 35.850889 112.532653 
 127.241333 35.851000 108.310620 
 127.241333 35.851111 100.326591 
 127.241444 35.851111 97.933058 
 127.241444 35.851222 94.690756 
 127.241444 35.851333 89.374815 
 127.241444 35.851444 84.724892 
 127.241556 35.851444 83.343573 
 127.241556 35.851556 83.344172 
 127.241556 35.851667 86.624255 
 127.241667 35.851667 94.376474 
 127.241667 35.851778 102.156092 
 127.241667 35.851889 106.359487 
 127.241778 35.851889 107.540599 
 127.241778 35.852000 114.397314 
 127.241778 35.852111 121.983464 
 127.241889 35.852111 127.352540 
 127.241889 35.852222 127.447216 
 127.241889 35.852333 125.033992 
 127.242000 35.852333 127.360239 
 127.242000 35.852445 123.781784 
 127.242000 35.852556 118.336106 
 127.242000 35.852667 115.749637 
 127.242111 35.852667 130.644539 
 127.242111 35.852778 128.361140 
 127.242111 35.852889 128.361317 
 127.242222 35.852889 130.646694 
 127.242222 35.853000 130.611366 
 127.242222 35.853111 130.638121 
 127.242333 35.853111 133.658132 
 127.242333 35.853222 140.117736 
 127.242333 35.853333 148.867061 
 127.242444 35.853333 154.685209 
 127.242444 35.853445 157.499075 
 127.242444 35.853556 157.678076 
 127.242556 35.853556 158.349753 
 127.242556 35.853667 158.349176 
 127.242556 35.853778 158.328674 
 127.242556 35.853889 157.905936 
 127.242667 35.853889 160.345377 
 127.242667 35.854000 161.279420 
 127.242667 35.854111 161.776283 
 127.242778 35.854111 163.511392 
 127.242778 35.854222 163.400511 
 127.242778 35.854333 163.404250 
 127.242889 35.854333 166.076172 
 127.242889 35.854445 164.715074 
 127.242889 35.854556 162.298985 
 127.243000 35.854556 159.388540 
 127.243000 35.854667 156.664649 
 127.243000 35.854778 154.684127 
 127.243111 35.854778 152.842414 
 127.243111 35.854889 147.860872 
 127.243111 35.855000 140.128049 
 127.243111 35.855111 131.817413 
 127.243222 35.855111 131.807037 
 127.243222 35.855222 128.379681 
 127.243222 35.855333 123.880601 
 127.243333 35.855333 120.298207 
 127.243333 35.855444 110.066216 
 127.243333 35.855555 103.260682 
 127.243444 35.855555 101.312905 
 127.243444 35.855667 95.490983 
 127.243444 35.855778 86.739649 
 127.243556 35.855778 82.333067 
 127.243556 35.855889 78.732127 
 127.243556 35.856000 77.229981 
 127.243667 35.856000 77.848752 
 127.243667 35.856111 76.451425 
 127.243667 35.856222 73.648385 
 127.243778 35.856333 69.725693 
 127.243778 35.856444 68.615317 
 127.243778 35.856555 68.615255 
 127.243889 35.856555 68.615261 
 127.243889 35.856667 68.580234 
 127.243889 35.856778 66.931611 
 127.244000 35.856778 67.783135 
 127.244000 35.856889 66.832863 
 127.244000 35.857000 65.664458 
 127.244111 35.857000 65.665030 
 127.244111 35.857111 64.998418 
 127.244111 35.857222 64.852074 
 127.244222 35.857222 64.416751 
 127.244222 35.857333 64.372527 
 127.244222 35.857444 64.492496 
 127.244333 35.857444 64.891340 
 127.244333 35.857556 64.903584 
 127.244333 35.857667 64.911019 
 127.244333 35.857778 64.896119 
 127.244444 35.857778 64.943466 
 127.244444 35.857889 64.889198 
 127.244444 35.858000 64.772227 
 127.244556 35.858000 64.896985 
 127.244556 35.858111 64.888944 
 127.244556 35.858222 64.779193 
 127.244667 35.858222 64.889040 
 127.244667 35.858333 64.475218 
 127.244667 35.858444 64.370149 
 127.244778 35.858444 64.860503 
 127.244778 35.858556 64.489388 
 127.244778 35.858667 64.378437 
 127.244889 35.858667 64.892422 
 127.244889 35.858778 64.889347 
 127.244889 35.858889 64.887850 
 127.244889 35.859000 64.850152 
 127.245000 35.859000 64.980008 
 127.245000 35.859111 64.969245 
 127.245000 35.859222 64.992483 
 127.245111 35.859222 65.007442 
 127.245111 35.859333 65.007840 
 127.245111 35.859444 65.008397 
 127.245222 35.859444 65.005776 
 127.245222 35.859556 65.007855 
 127.245222 35.859667 65.010269 
 127.245333 35.859667 65.003897 
 127.245333 35.859778 65.003246 
 127.245333 35.859889 64.999428 
 127.245444 35.859889 65.000086 
 127.245444 35.860000 65.001606 
 127.245444 35.860111 65.004371 
 127.245444 35.860222 65.006930 
 127.245556 35.860222 65.007850 
 127.245556 35.860333 64.901501 
 127.245556 35.860444 64.885979 
 127.245667 35.860444 64.638904 
 127.245667 35.860556 64.369811 
 127.245667 35.860667 64.367506 
 127.245778 35.860667 64.137068 
 127.245778 35.860778 64.087108 
 127.245778 35.860889 64.043031 
 127.245889 35.860889 64.130387 
 127.245889 35.861000 64.038940 
 127.245889 35.861111 64.037737 
 127.246000 35.861111 64.037990 
 127.246000 35.861222 64.041415 
 127.246000 35.861333 64.344854 
 127.246000 35.861444 64.387710 
 127.246111 35.861444 65.006297 
 127.246111 35.861556 65.010963 
 127.246111 35.861667 64.991495 
 127.246222 35.861667 65.010504 
 127.246222 35.861778 64.889216 
 127.246222 35.861889 64.364161 
 127.246333 35.861889 64.882095 
 127.246333 35.862000 64.367111 
 127.246333 35.862111 64.188859 
 127.246444 35.862111 64.370242 
 127.246444 35.862222 64.366026 
 127.246444 35.862333 64.370016 
 127.246556 35.862333 64.393544 
 127.246556 35.862444 65.664432 
 127.246556 35.862556 68.615259 
 127.246667 35.862667 72.722165 
 127.246667 35.862778 75.783093 
 127.246667 35.862889 75.844560 
 127.246778 35.862889 72.553028 
 127.246778 35.863000 71.797623 
 127.246778 35.863111 68.773633 
 127.246889 35.863111 69.995313 
 127.246889 35.863222 68.425358 
 127.246889 35.863333 65.664658 
 127.247000 35.863333 65.675824 
 127.247000 35.863444 65.664437 
 127.247000 35.863556 65.661821 
 127.247111 35.863556 65.664437 
 127.247111 35.863667 65.664434 
 127.247111 35.863778 65.664433 
 127.247222 35.863778 65.664445 
 127.247222 35.863889 65.664440 
 127.247222 35.864000 65.664436 
 127.247222 35.864111 65.664432 
 127.247333 35.864111 65.664437 
 127.247333 35.864222 65.255301 
 127.247333 35.864333 64.996557 
 127.247444 35.864333 65.664433 
 127.247444 35.864445 65.664431 
 127.247444 35.864556 65.696315 
 127.247556 35.864556 66.928044 
 127.247556 35.864667 68.310587 
 127.247556 35.864778 68.615306 
 127.247667 35.864778 66.931299 
 127.247667 35.864889 66.941354 
 127.247667 35.865000 68.584344 
 127.247778 35.865000 68.626249 
 127.247778 35.865111 69.723079 
 127.247778 35.865222 69.812163 
 127.247778 35.865333 69.817328 
 127.247889 35.865333 69.859031 
 127.247889 35.865445 69.801300 
 127.247889 35.865556 69.796686 
 127.248000 35.865556 69.759292 
 127.248000 35.865667 69.780762 
 127.248000 35.865778 69.911481 
 127.248111 35.865778 69.720805 
 127.248111 35.865889 69.726648 
 127.248111 35.866000 69.762049 
 127.248222 35.866000 69.744468 
 127.248222 35.866111 69.890754 
 127.248222 35.866222 70.066156 
 127.248333 35.866222 70.333367 
 127.248333 35.866333 70.417142 
 127.248333 35.866445 70.827890 
 127.248333 35.866556 70.901310 
 127.248444 35.866556 70.900122 
 127.248444 35.866667 70.901501 
 127.248444 35.866778 70.901716 
 127.248556 35.866778 70.875254 
 127.248556 35.866889 70.504902 
 127.248556 35.867000 70.412994 
 127.248667 35.867000 70.377471 
 127.248667 35.867111 70.365511 
 127.248667 35.867222 70.393082 
 127.248778 35.867222 70.398551 
 127.248778 35.867333 70.418829 
 127.248778 35.867444 70.442864 
 127.248889 35.867444 70.416496 
 127.248889 35.867555 70.780214 
 127.248889 35.867667 70.901262 
 127.249000 35.867667 70.901625 
 127.249000 35.867778 71.288790 
 127.249000 35.867889 71.797218 
 127.249000 35.868000 71.810139 
 127.249111 35.868000 71.820787 
 127.249111 35.868111 72.553108 
 127.249111 35.868222 72.599327 
 127.249222 35.868222 72.553109 
 127.249222 35.868333 73.313800 
 127.249222 35.868444 73.645229 
 127.249333 35.868444 73.635590 
 127.249333 35.868555 73.644540 
 127.249333 35.868667 73.645288 
 127.249444 35.868667 72.558070 
 127.249444 35.868778 73.624740 
 127.249444 35.868889 73.663851 
 127.249556 35.868889 73.794452 
 127.249556 35.869000 74.297783 
 127.249556 35.869111 74.518226 
 127.249556 35.869222 74.590352 
 127.249667 35.869222 74.735169 
 127.249667 35.869333 74.746540 
 127.249667 35.869444 74.755824 
 127.249778 35.869444 74.769480 
 127.249778 35.869555 74.770522 
 127.249778 35.869667 74.774762 
 127.249889 35.869667 74.875939 
 127.249889 35.869778 74.933619 
 127.249889 35.869889 74.863432 
 127.250000 35.869889 75.857895 
 127.250000 35.870000 75.846601 
 127.250000 35.870111 75.826635 
 127.250111 35.870111 75.992031 
 127.250111 35.870222 75.859518 
 127.250111 35.870333 75.851055 
 127.250111 35.870444 75.848565 
 127.250222 35.870444 75.888998 
 127.250222 35.870556 75.870683 
 127.250222 35.870667 75.868708 
 127.250333 35.870667 75.848064 
 127.250333 35.870778 75.910913 
 127.250333 35.870889 76.394755 
 127.250444 35.870889 76.450270 
 127.250444 35.871000 76.462238 
 127.250444 35.871111 76.665403 
 127.250556 35.871111 77.077974 
 127.250556 35.871222 77.221884 
 127.250556 35.871333 77.230047 
 127.250667 35.871333 77.230863 
 127.250667 35.871444 77.236260 
 127.250667 35.871556 77.755200 
 127.250778 35.871667 78.734342 
 127.250778 35.871778 79.166887 
 127.250778 35.871889 79.474213 
 127.250889 35.871889 80.803788 
 127.250889 35.872000 81.455906 
 127.250889 35.872111 83.187756 
 127.251000 35.872111 83.187629 
 127.251000 35.872222 84.726860 
 127.251000 35.872333 86.739902 
 127.251111 35.872333 90.646031 
 127.251111 35.872444 94.375488 
 127.251111 35.872556 100.166087 
 127.251222 35.872556 104.131286 
 127.251222 35.872667 109.598057 
 127.251222 35.872778 112.125251 
 127.251333 35.872778 114.354333 
 127.251333 35.872889 115.786393 
 127.251333 35.873000 116.784048 
 127.251333 35.873111 117.152719 
 127.251444 35.873111 120.068501 
 127.251444 35.873222 118.571332 
 127.251444 35.873333 116.648444 
 127.251556 35.873333 122.107687 
 127.251556 35.873444 119.471252 
 127.251556 35.873556 118.517403 
 127.251667 35.873556 128.361329 
 127.251667 35.873667 128.358574 
 127.251667 35.873778 128.454256 
 127.251778 35.873778 130.637595 
 127.251778 35.873889 132.104082 
 127.251778 35.874000 132.461521 
 127.251889 35.874000 129.505455 
 127.251889 35.874111 127.769787 
 127.251889 35.874222 124.999460 
 127.251889 35.874333 124.152469 
 127.252000 35.874333 123.254524 
 127.252000 35.874444 122.122467 
 127.252000 35.874556 123.254845 
 127.252111 35.874556 121.714613 
 127.252111 35.874667 120.452385 
 127.252111 35.874778 120.713266 
 127.252222 35.874778 116.992705 
 127.252222 35.874889 116.784186 
 127.252222 35.875000 116.272727 
 127.252333 35.875000 115.237616 
 127.252333 35.875111 114.391570 
 127.252333 35.875222 114.347562 
 127.252444 35.875222 112.038454 
 127.252444 35.875333 112.357248 
 127.252444 35.875444 114.343978 
 127.252444 35.875556 119.978591 
 127.252556 35.875556 123.500519 
 127.252556 35.875667 129.503486 
 127.252556 35.875778 137.032991 
 127.252667 35.875778 138.964193 
 127.252667 35.875889 143.664351 
 127.252667 35.876000 145.581849 
 127.252778 35.876000 148.683340 
 127.252778 35.876111 150.517080 
 127.252778 35.876222 154.605986 
 127.252889 35.876222 159.618405 
 127.252889 35.876333 163.608507 
 127.252889 35.876444 166.077841 
 127.253000 35.876444 163.957800 
 127.253000 35.876556 164.871732 
 127.253000 35.876667 166.143236 
 127.253111 35.876778 161.329818 
 127.253111 35.876889 160.344742 
 127.253111 35.877000 159.384034 
 127.253222 35.877000 157.515012 
 127.253222 35.877111 156.645996 
 127.253222 35.877222 152.040776 
 127.253333 35.877222 141.125894 
 127.253333 35.877333 137.010429 
 127.253333 35.877445 135.564244 
 127.253444 35.877445 133.659799 
 127.253444 35.877556 132.374975 
 127.253444 35.877667 130.637652 
 127.253556 35.877667 127.308067 
 127.253556 35.877778 127.769973 
 127.253556 35.877889 130.646714 
 127.253667 35.877889 130.646685 
 127.253667 35.878000 138.556967 
 127.253667 35.878111 145.973667 
 127.253667 35.878222 152.220160 
 127.253778 35.878222 148.873591 
 127.253778 35.878333 150.404528 
 127.253778 35.878445 148.522383 
 127.253889 35.878445 138.553622 
 127.253889 35.878556 137.010291 
 127.253889 35.878667 136.839009 
 127.254000 35.878667 133.544244 
 127.254000 35.878778 133.659465 
 127.254000 35.878889 132.212050 
 127.254111 35.878889 130.660485 
 127.254111 35.879000 129.176121 
 127.254111 35.879111 123.702986 
 127.254222 35.879111 123.728256 
 127.254222 35.879222 116.887678 
 127.254222 35.879333 111.978946 
 127.254222 35.879445 109.539715 
 127.254333 35.879445 106.961078 
 127.254333 35.879556 105.533370 
 127.254333 35.879667 103.501034 
 127.254444 35.879667 102.652849 
 127.254444 35.879778 101.278179 
 127.254444 35.879889 101.293707 
 127.254556 35.879889 100.171017 
 127.254556 35.880000 102.704418 
 127.254556 35.880111 105.262504 
 127.254667 35.880111 103.566409 
 127.254667 35.880222 106.355347 
 127.254667 35.880333 108.693145 
 127.254778 35.880333 107.475798 
 127.254778 35.880444 108.708175 
 127.254778 35.880555 110.071127 
 127.254778 35.880667 112.037908 
 127.254889 35.880667 108.702565 
 127.254889 35.880778 112.036981 
 127.254889 35.880889 116.781762 
 127.255000 35.880889 112.086478 
 127.255000 35.881000 120.714863 
 127.255000 35.881111 128.184515 
 127.255111 35.881111 119.470769 
 127.255111 35.881222 126.294093 
 127.255111 35.881333 130.638206 
 127.255222 35.881333 120.669781 
 127.255222 35.881444 122.179632 
 127.255222 35.881555 123.837023 
 127.255333 35.881555 120.047617 
 127.255333 35.881667 120.060906 
 127.255333 35.881778 120.072963 
 127.255333 35.881889 120.726083 
 127.255444 35.881889 117.155957 
 127.255444 35.882000 119.468152 
 127.255444 35.882111 122.097127 
 127.255556 35.882111 120.560202 
 127.255556 35.882222 124.926130 
 127.255556 35.882333 126.433596 
 127.255667 35.882333 123.700576 
 127.255667 35.882444 125.406709 
 127.255667 35.882556 125.402316 
 127.255778 35.882556 119.496900 
 127.255778 35.882667 118.519017 
 127.255778 35.882778 118.519621 
 127.255889 35.882778 115.783825 
 127.255889 35.882889 118.519430 
 127.255889 35.883000 123.253181 
 127.255889 35.883111 126.122341 
 127.256000 35.883111 125.407594 
 127.256000 35.883222 124.999602 
 127.256000 35.883333 121.392650 
 127.256111 35.883333 120.554733 
 127.256111 35.883444 114.344750 
 127.256111 35.883556 110.303331 
 127.256222 35.883556 110.077657 
 127.256222 35.883667 109.585177 
 127.256222 35.883778 109.595615 
 127.256333 35.883778 109.597997 
 127.256333 35.883889 110.142557 
 127.256333 35.884000 111.953077 
 127.256444 35.884000 111.747455 
 127.256444 35.884111 114.394505 
 127.256444 35.884222 120.071647 
 127.256444 35.884333 121.402342 
 127.256556 35.884333 117.158322 
 127.256556 35.884444 119.447551 
 127.256556 35.884556 118.573140 
 127.256667 35.884556 114.575444 
 127.256667 35.884667 114.397347 
 127.256667 35.884778 115.784834 
 127.256778 35.884778 114.321557 
 127.256778 35.884889 114.353968 
 127.256778 35.885000 115.337303 
 127.256889 35.885000 114.354544 
 127.256889 35.885111 114.397383 
 127.256889 35.885222 115.247203 
 127.257000 35.885222 114.397292 
 127.257000 35.885333 115.591281 
 127.257000 35.885444 116.310174 
 127.257000 35.885556 117.175036 
 127.257111 35.885556 116.222679 
 127.257111 35.885667 116.232471 
 127.257111 35.885778 116.715087 
 127.257222 35.885778 116.222668 
 127.257222 35.885889 116.340784 
 127.257222 35.886000 116.784634 
 127.257333 35.886000 115.965947 
 127.257333 35.886111 116.259749 
 127.257333 35.886222 116.804731 
 127.257444 35.886222 116.395253 
 127.257444 35.886333 116.815121 
 127.257444 35.886444 117.156103 
 127.257556 35.886444 116.406279 
 127.257556 35.886556 116.772946 
 127.257556 35.886667 116.783971 
 127.257556 35.886778 116.880066 
 127.257667 35.886778 116.777687 
 127.257667 35.886889 116.880711 
 127.257667 35.887000 117.165351 
 127.257778 35.887000 116.224837 
 127.257778 35.887111 116.629268 
 127.257778 35.887222 116.783794 
 127.257889 35.887222 115.806616 
 127.257889 35.887333 116.221625 
 127.257889 35.887444 116.230194 
 127.258000 35.887444 116.253290 
 127.258000 35.887556 116.788664 
 127.258000 35.887667 117.174695 
 127.258111 35.887667 118.577714 
 127.258111 35.887778 119.470434 
 127.258111 35.887889 119.517147 
 127.258222 35.887889 119.962412 
 127.258222 35.888000 120.579670 
 127.258222 35.888111 120.560543 
 127.258222 35.888222 120.715377 
 127.258333 35.888222 121.694796 
 127.258333 35.888333 121.393023 
 127.258333 35.888444 122.596765 
 127.258444 35.888444 122.184393 
 127.258444 35.888556 123.831248 
 127.258444 35.888667 124.164131 
 127.258556 35.888667 124.906841 
 127.258556 35.888778 125.024452 
 127.258556 35.888889 124.881484 
 127.258667 35.888889 125.435489 
 127.258667 35.889000 125.119059 
 127.258667 35.889111 124.925948 
 127.258778 35.889111 126.294367 
 127.258778 35.889222 125.102259 
 127.258778 35.889333 124.995472 
 127.258778 35.889444 125.139603 
 127.258889 35.889444 126.112871 
 127.258889 35.889556 126.809991 
 127.258889 35.889667 128.360601 
 127.259000 35.889667 128.927382 
 127.259000 35.889778 130.645753 
 127.259000 35.889889 130.645275 
 127.259111 35.889889 130.646662 
 127.259111 35.890000 130.637720 
 127.259111 35.890111 132.388351 
 127.259222 35.890111 131.843087 
 127.259222 35.890222 133.647049 
 127.259222 35.890333 135.632166 
 127.259333 35.890333 133.645410 
 127.259333 35.890445 133.542875 
 127.259333 35.890556 135.563484 
 127.259333 35.890667 136.841512 
 127.259444 35.890667 136.595672 
 127.259444 35.890778 136.840471 
 127.259444 35.890889 138.540492 
 127.259556 35.890889 140.125427 
 127.259556 35.891000 141.208867 
 127.259556 35.891111 143.019845 
 127.259667 35.891111 144.945338 
 127.259667 35.891222 145.765111 
 127.259667 35.891333 148.873064 
 127.259778 35.891333 151.933006 
 127.259778 35.891445 157.897472 
 127.259778 35.891556 163.503301 
 127.259889 35.891556 166.674719 
 127.259889 35.891667 169.876349 
 127.259889 35.891778 175.643088 
 127.259889 35.891889 180.529308 
 127.260000 35.891889 186.107407 
 127.260000 35.892000 188.135760 
 127.260000 35.892111 190.779257 
 127.260111 35.892111 192.799628 
 127.260111 35.892222 202.010377 
 127.260111 35.892333 207.634701 
 127.260222 35.892333 205.292032 
 127.260222 35.892444 208.336664 
 127.260222 35.892555 214.525070 
 127.260333 35.892555 214.388423 
 127.260333 35.892667 230.421219 
 127.260333 35.892778 240.253303 
 127.260444 35.892778 238.278730 
 127.260444 35.892889 244.050099 
 127.260444 35.893000 251.757933 
 127.260444 35.893111 266.996249 
 127.260556 35.893111 261.880720 
 127.260556 35.893222 266.881058 
 127.260556 35.893333 270.457310 
 127.260667 35.893333 267.398824 
 127.260667 35.893444 277.570303 
 127.260667 35.893555 286.251943 
 127.260778 35.893555 287.011678 
 127.260778 35.893667 290.675011 
 127.260778 35.893778 291.176036 
 127.260889 35.893778 298.461952 
 127.260889 35.893889 298.462058 
 127.260889 35.894000 297.802108 
 127.261000 35.894000 309.015518 
 127.261000 35.894111 308.920179 
 127.261000 35.894222 305.318409 
 127.261000 35.894333 301.426675 
 127.261111 35.894333 313.269028 
 127.261111 35.894444 311.850692 
 127.261111 35.894555 308.290557 
 127.261222 35.894555 324.408439 
 127.261222 35.894667 321.329655 
 127.261222 35.894778 317.410641 
 127.261333 35.894778 329.716098 
 127.261333 35.894889 324.826781 
 127.261333 35.895000 321.783091 
 127.261444 35.895000 341.051729 
 127.261444 35.895111 332.462711 
 127.261444 35.895222 327.300074 
 127.261556 35.895222 335.937120 
 127.261556 35.895333 333.512659 
 127.261556 35.895444 331.806156 
 127.261556 35.895556 332.540937 
 127.261667 35.895556 349.420797 
 127.261667 35.895667 351.134128 
 127.261667 35.895778 352.176183 
 127.261778 35.895778 359.746001 
 127.261778 35.895889 365.293438 
 127.261778 35.896000 372.719722 
 127.261889 35.896000 383.361845 
 127.261889 35.896111 387.388287 
 127.261889 35.896222 391.199457 
 127.262000 35.896222 400.594198 
 127.262000 35.896333 400.956523 
 127.262000 35.896444 402.761049 
 127.262111 35.896444 407.877712 
 127.262111 35.896556 413.868546 
 127.262111 35.896667 420.185472 
 127.262222 35.896778 430.249222 
 127.262222 35.896889 437.128221 
 127.262222 35.897000 448.752718 
 127.262333 35.897000 471.183970 
 127.262333 35.897111 474.299997 
 127.262333 35.897222 477.274632 
 127.262444 35.897222 476.469389 
 127.262444 35.897333 478.429530 
 127.262444 35.897444 480.679884 
 127.262556 35.897444 485.166913 
 127.262556 35.897556 485.602974 
 127.262556 35.897667 485.177548 
 127.262667 35.897667 481.580532 
 127.262667 35.897778 476.490301 
 127.262667 35.897889 465.664326 
 127.262778 35.897889 464.189848 
 127.262778 35.898000 456.468286 
 127.262778 35.898111 453.005239 
 127.262778 35.898222 451.385665 
 127.262889 35.898222 448.698920 
 127.262889 35.898333 442.559957 
 127.262889 35.898444 439.828200 
 127.263000 35.898444 437.060797 
 127.263000 35.898556 437.071781 
 127.263000 35.898667 441.160690 
 127.263111 35.898667 436.535836 
 127.263111 35.898778 446.884828 
 127.263111 35.898889 455.868649 
 127.263222 35.898889 455.418946 
 127.263222 35.899000 457.453572 
 127.263222 35.899111 457.507267 
 127.263333 35.899111 450.863851 
 127.263333 35.899222 453.008080 
 127.263333 35.899333 453.007545 
 127.263333 35.899444 453.007049 
 127.263444 35.899444 446.250637 
 127.263444 35.899556 448.759665 
 127.263444 35.899667 451.779262 
 127.263556 35.899667 447.754284 
 127.263556 35.899778 451.162879 
 127.263556 35.899889 461.358545 
 127.263667 35.899889 460.204529 
 127.263667 35.900000 467.585234 
 127.263667 35.900111 476.474710 
 127.263778 35.900111 468.994411 
 127.263778 35.900222 473.541627 
 127.263778 35.900333 476.464060 
 127.263889 35.900333 473.543025 
 127.263889 35.900444 474.433782 
 127.263889 35.900556 474.224141 
 127.263889 35.900667 474.429696 
 127.264000 35.900667 468.270425 
 127.264000 35.900778 468.111231 
 127.264000 35.900889 468.272813 
 127.264111 35.900889 469.135518 
 127.264111 35.901000 463.331606 
 127.264111 35.901111 460.176062 
 127.264222 35.901111 461.001701 
 127.264222 35.901222 455.234216 
 127.264222 35.901333 450.866970 
 127.264333 35.901333 444.766967 
 127.264333 35.901444 440.068177 
 127.264333 35.901556 436.397169 
 127.264444 35.901556 423.491639 
 127.264444 35.901667 420.280354 
 127.264444 35.901778 412.276581 
 127.264444 35.901889 401.827108 
 127.264556 35.901889 391.192190 
 127.264556 35.902000 383.364880 
 127.264556 35.902111 379.901585 
 127.264667 35.902111 379.814329 
 127.264667 35.902222 376.972888 
 127.264667 35.902333 372.283790 
 127.264778 35.902333 364.986584 
 127.264778 35.902445 362.006591 
 127.264778 35.902556 361.496963 
 127.264889 35.902556 347.728417 
 127.264889 35.902667 345.953583 
 127.264889 35.902778 344.916289 
 127.265000 35.902778 341.058529 
 127.265000 35.902889 340.555191 
 127.265000 35.903000 337.519210 
 127.265000 35.903111 334.368759 
 127.265111 35.903111 333.510246 
 127.265111 35.903222 327.276198 
 127.265111 35.903333 320.079419 
 127.265222 35.903333 321.701783 
 127.265222 35.903445 314.349709 
 127.265222 35.903556 304.433320 
 127.265333 35.903556 303.938639 
 127.265333 35.903667 293.620827 
 127.265333 35.903778 287.848971 
 127.265444 35.903778 288.389169 
 127.265444 35.903889 282.596994 
 127.265444 35.904000 275.998457 
 127.265556 35.904000 274.617808 
 127.265556 35.904111 268.409830 
 127.265556 35.904222 266.382070 
 127.265556 35.904333 263.883016 
 127.265667 35.904333 259.405305 
 127.265667 35.904445 258.678087 
 127.265667 35.904556 256.288229 
 127.265778 35.904556 253.602120 
 127.265778 35.904667 247.194014 
 127.265778 35.904778 242.808547 
 127.265889 35.904778 241.166233 
 127.265889 35.904889 239.694427 
 127.265889 35.905000 237.771966 
 127.266000 35.905000 236.652135 
 127.266000 35.905111 233.202721 
 127.266000 35.905222 230.791969 
 127.266111 35.905222 227.255895 
 127.266111 35.905333 224.530581 
 127.266111 35.905444 222.228283 
 127.266111 35.905555 221.251805 
 127.266222 35.905555 220.042507 
 127.266222 35.905667 221.789786 
 127.266222 35.905778 222.964900 
 127.266333 35.905778 223.890970 
 127.266333 35.905889 226.618488 
 127.266333 35.906000 227.869044 
 127.266444 35.906000 231.146529 
 127.266444 35.906111 235.130514 
 127.266444 35.906222 236.717571 
 127.266556 35.906222 246.004388 
 127.266556 35.906333 245.931137 
 127.266556 35.906444 248.809513 
 127.266667 35.906444 252.400730 
 127.266667 35.906555 256.959661 
 127.266667 35.906667 262.183950 
 127.266667 35.906778 266.995625 
 127.266778 35.906778 269.511088 
 127.266778 35.906889 270.860938 
 127.266778 35.907000 272.858385 
 127.266889 35.907000 284.697311 
 127.266889 35.907111 286.100694 
 127.266889 35.907222 285.858409 
 127.267000 35.907222 287.891121 
 127.267000 35.907333 284.313981 
 127.267000 35.907444 279.958615 
 127.267111 35.907444 283.100552 
 127.267111 35.907555 285.793193 
 127.267111 35.907667 287.888985 
 127.267222 35.907667 293.850075 
 127.267222 35.907778 296.270343 
 127.267222 35.907889 297.642061 
 127.267222 35.908000 297.251259 
 127.267333 35.908000 303.094148 
 127.267333 35.908111 308.274169 
 127.267333 35.908222 310.746888 
 127.267444 35.908222 313.823604 
 127.267444 35.908333 315.060030 
 127.267444 35.908444 314.508797 
 127.267556 35.908444 321.701850 
 127.267556 35.908556 317.795519 
 127.267556 35.908667 313.826281 
 127.267667 35.908667 329.742271 
 127.267667 35.908778 336.140227 
 127.267667 35.908889 340.054753 
 127.267778 35.909000 345.898106 
 127.267778 35.909111 344.303016 
 127.267778 35.909222 343.654391 
 127.267889 35.909222 348.878990 
 127.267889 35.909333 347.172876 
 127.267889 35.909444 345.973311 
 127.268000 35.909444 354.160923 
 127.268000 35.909556 352.177299 
 127.268000 35.909667 346.408764 
 127.268111 35.909667 358.119558 
 127.268111 35.909778 352.174206 
 127.268111 35.909889 342.611728 
 127.268222 35.909889 344.940533 
 127.268222 35.910000 328.906644 
 127.268222 35.910111 317.789202 
 127.268222 35.910222 313.333990 
 127.268333 35.910222 313.663523 
 127.268333 35.910333 308.522016 
 127.268333 35.910444 301.280683 
 127.268444 35.910444 298.462083 
 127.268444 35.910556 297.144942 
 127.268444 35.910667 295.351944 
 127.268556 35.910667 304.030332 
 127.268556 35.910778 308.921551 
 127.268556 35.910889 311.117091 
 127.268667 35.910889 315.595238 
 127.268667 35.911000 317.430172 
 127.268667 35.911111 318.875632 
 127.268778 35.911111 321.886208 
 127.268778 35.911222 322.467822 
 127.268778 35.911333 321.368472 
 127.268778 35.911444 315.595213 
 127.268889 35.911444 311.859939 
 127.268889 35.911556 300.195393 
 127.268889 35.911667 293.454155 
 127.269000 35.911667 299.415957 
 127.269000 35.911778 297.245048 
 127.269000 35.911889 297.249328 
 127.269111 35.911889 303.684337 
 127.269111 35.912000 300.084835 
 127.269111 35.912111 296.651198 
 127.269222 35.912111 299.383776 
 127.269222 35.912222 296.268801 
 127.269222 35.912333 293.610247 
 127.269333 35.912333 294.548443 
 127.269333 35.912444 289.355266 
 127.269333 35.912556 279.906047 
 127.269333 35.912667 269.729282 
 127.269444 35.912667 275.118627 
 127.269444 35.912778 269.786521 
 127.269444 35.912889 266.352066 
 127.269556 35.912889 271.087275 
 127.269556 35.913000 273.074507 
 127.269556 35.913111 278.673161 
 127.269667 35.913111 285.033547 
 127.269667 35.913222 293.608992 
 127.269667 35.913333 300.683489 
 127.269778 35.913333 304.829814 
 127.269778 35.913444 304.853963 
 127.269778 35.913556 304.431391 
 127.269889 35.913556 308.520466 
 127.269889 35.913667 308.187326 
 127.269889 35.913778 303.684908 
 127.269889 35.913889 296.284847 
 127.270000 35.913889 294.784353 
 127.270000 35.914000 286.209026 
 127.270000 35.914111 277.308587 
 127.270111 35.914111 275.118382 
 127.270111 35.914222 273.038813 
 127.270111 35.914333 270.309095 
 127.270222 35.914333 274.834948 
 127.270222 35.914444 271.087064 
 127.270222 35.914556 268.496564 
 127.270333 35.914556 270.862736 
 127.270333 35.914667 268.732118 
 127.270333 35.914778 266.349485 
 127.270333 35.914889 263.991407 
 127.270444 35.914889 266.894661 
 127.270444 35.915000 266.384906 
 127.270444 35.915111 263.836712 
 127.270556 35.915111 269.555716 
 127.270556 35.915222 267.560741 
 127.270556 35.915333 263.990636 
 127.270667 35.915333 268.496612 
 127.270667 35.915445 263.491595 
 127.270667 35.915556 258.372951 
 127.270778 35.915556 255.384613 
 127.270778 35.915667 250.851784 
 127.270778 35.915778 248.807235 
 127.270889 35.915778 252.454430 
 127.270889 35.915889 250.759649 
 127.270889 35.916000 250.250478 
 127.270889 35.916111 252.045309 
 127.271000 35.916111 257.653737 
 127.271000 35.916222 256.949456 
 127.271000 35.916333 256.252336 
 127.271111 35.916333 262.019936 
 127.271111 35.916445 262.421473 
 127.271111 35.916556 264.180278 
 127.271222 35.916556 276.506229 
 127.271222 35.916667 275.497350 
 127.271222 35.916778 271.087149 
 127.271333 35.916778 274.738692 
 127.271333 35.916889 263.534938 
 127.271333 35.917000 254.149981 
 127.271333 35.917111 249.422838 
 127.271444 35.917111 252.335958 
 127.271444 35.917222 250.209126 
 127.271444 35.917333 252.350247 
 127.271556 35.917333 255.074252 
 127.271556 35.917444 261.915873 
 127.271556 35.917556 271.089596 
 127.271667 35.917556 274.828985 
 127.271667 35.917667 278.673249 
 127.271667 35.917778 284.579016 
 127.271778 35.917778 283.474519 
 127.271778 35.917889 293.610846 
 127.271778 35.918000 305.892659 
 127.271889 35.918000 316.448403 
 127.271889 35.918111 323.224914 
 127.271889 35.918222 322.908196 
 127.271889 35.918333 318.030917 
 127.272000 35.918333 322.858934 
 127.272000 35.918444 313.824536 
 127.272000 35.918555 303.521953 
 127.272111 35.918555 301.615607 
 127.272111 35.918667 297.476801 
 127.272111 35.918778 289.358409 
 127.272222 35.918778 289.957863 
 127.272222 35.918889 278.463478 
 127.272222 35.919000 267.398047 
 127.272333 35.919000 267.563525 
 127.272333 35.919111 266.398246 
 127.272333 35.919222 266.452233 
 127.272333 35.919333 269.368062 
 127.272444 35.919333 278.673056 
 127.272444 35.919444 282.652624 
 127.272444 35.919555 282.929689 
 127.272556 35.919555 285.758775 
 127.272556 35.919667 284.579221 
 127.272556 35.919778 278.523026 
 127.272667 35.919778 292.459598 
 127.272667 35.919889 280.868279 
 127.272667 35.920000 272.844617 
 127.272778 35.920000 277.845948 
 127.272778 35.920111 273.070535 
 127.272778 35.920222 272.870629 
 127.272889 35.920222 282.929987 
 127.272889 35.920333 280.901445 
 127.272889 35.920444 280.762192 
 127.272889 35.920556 282.795827 
 127.273000 35.920556 284.585996 
 127.273000 35.920667 284.446605 
 127.273000 35.920778 283.469031 
 127.273111 35.920778 289.341998 
 127.273111 35.920889 285.029105 
 127.273111 35.921000 276.806544 
 127.273222 35.921000 280.059092 
 127.273222 35.921111 270.309035 
 127.273222 35.921222 263.956220 
 127.273333 35.921222 258.689427 
 127.273333 35.921333 254.875955 
 127.273333 35.921444 252.351364 
 127.273333 35.921556 249.470589 
 127.273444 35.921556 247.206925 
 127.273444 35.921667 244.271901 
 127.273444 35.921778 237.705546 
 127.273556 35.921778 227.348591 
 127.273556 35.921889 223.396778 
 127.273556 35.922000 220.079143 
 127.273667 35.922000 217.303233 
 127.273667 35.922111 214.453995 
 127.273667 35.922222 209.474986 
 127.273778 35.922222 205.209094 
 127.273778 35.922333 201.853079 
 127.273778 35.922444 200.513933 
 127.273889 35.922556 194.049584 
 127.273889 35.922667 190.778905 
 127.273889 35.922778 186.073163 
 127.274000 35.922778 180.778822 
 127.274000 35.922889 179.106917 
 127.274000 35.923000 178.456307 
 127.274111 35.923000 174.768284 
 127.274111 35.923111 172.214070 
 127.274111 35.923222 169.478883 
 127.274222 35.923222 168.498525 
 127.274222 35.923333 168.071343 
 127.274222 35.923444 166.683303 
 127.274333 35.923444 166.673632 
 127.274333 35.923556 164.886854 
 127.274333 35.923667 163.960593 
 127.274333 35.923778 163.503204 
 127.274444 35.923778 163.332466 
 127.274444 35.923889 162.185718 
 127.274444 35.924000 161.854510 
 127.274556 35.924000 160.068481 
 127.274556 35.924111 160.341632 
 127.274556 35.924222 159.416032 
 127.274667 35.924222 160.319208 
 127.274667 35.924333 160.344493 
 127.274667 35.924444 160.134735 
 127.274778 35.924444 162.108910 
 127.274778 35.924556 160.763348 
 127.274778 35.924667 160.475215 
 127.274778 35.924778 160.450668 
 127.274889 35.924778 163.501090 
 127.274889 35.924889 163.400217 
 127.274889 35.925000 163.401565 
 127.275000 35.925000 165.980117 
 127.275000 35.925111 168.085392 
 127.275000 35.925222 170.826252 
 127.275111 35.925222 177.873322 
 127.275111 35.925333 180.647669 
 127.275111 35.925444 182.570976 
 127.275222 35.925444 186.120212 
 127.275222 35.925556 189.728541 
 127.275222 35.925667 192.795987 
 127.275333 35.925778 212.748043 
 127.275333 35.925889 216.055170 
 127.275333 35.926000 218.240421 
 127.275444 35.926000 220.129246 
 127.275444 35.926111 221.248641 
 127.275444 35.926222 224.245303 
 127.275556 35.926222 233.423650 
 127.275556 35.926333 239.513558 
 127.275556 35.926444 241.516178 
 127.275667 35.926444 245.494175 
 127.275667 35.926556 248.808645 
 127.275667 35.926667 258.687834 
 127.275778 35.926667 271.810809 
 127.275778 35.926778 280.450890 
 127.275778 35.926889 284.312481 
 127.275778 35.927000 289.368319 
 127.275889 35.927000 296.637004 
 127.275889 35.927111 310.862832 
 127.275889 35.927222 318.016619 
 127.276000 35.927222 322.851435 
 127.276000 35.927333 323.808012 
 127.276000 35.927445 326.793054 
 127.276111 35.927445 329.017337 
 127.276111 35.927556 332.479704 
 127.276111 35.927667 336.028788 
 127.276222 35.927667 340.134894 
 127.276222 35.927778 340.134802 
 127.276222 35.927889 340.062054 
 127.276222 35.928000 340.534435 
 127.276333 35.928000 343.042320 
 127.276333 35.928111 340.889096 
 127.276333 35.928222 337.534886 
 127.276444 35.928222 345.957417 
 127.276444 35.928333 343.060662 
 127.276444 35.928445 337.588364 
 127.276556 35.928445 344.950268 
 127.276556 35.928556 341.035240 
 127.276556 35.928667 336.204864 
 127.276667 35.928667 341.250385 
 127.276667 35.928778 341.061195 
 127.276667 35.928889 338.213875 
 127.276778 35.928889 338.671677 
 127.276778 35.929000 332.539993 
 127.276778 35.929111 328.864765 
 127.276778 35.929222 326.813770 
 127.276889 35.929222 328.346211 
 127.276889 35.929333 324.792103 
 127.276889 35.929445 321.371555 
 127.277000 35.929445 323.942074 
 127.277000 35.929556 320.064165 
 127.277000 35.929667 311.135894 
 127.277111 35.929667 308.547356 
 127.277111 35.929778 300.456848 
 127.277111 35.929889 296.811452 
 127.277222 35.929889 300.695571 
 127.277222 35.930000 295.358704 
 127.277222 35.930111 292.047779 
 127.277222 35.930222 286.209061 
 127.277333 35.930222 287.728072 
 127.277333 35.930333 280.380863 
 127.277333 35.930444 274.698701 
 127.277444 35.930444 273.089169 
 127.277444 35.930555 272.843972 
 127.277444 35.930667 270.860137 
 127.277556 35.930667 270.308844 
 127.277556 35.930778 269.517716 
 127.277556 35.930889 269.502585 
 127.277667 35.930889 269.516590 
 127.277667 35.931000 271.087309 
 127.277667 35.931111 277.846481 
 127.277778 35.931111 280.382410 
 127.277778 35.931222 293.610726 
 127.277778 35.931333 304.067389 
 127.277778 35.931444 308.762882 
 127.277889 35.931444 311.845074 
 127.277889 35.931555 314.101314 
 127.277889 35.931667 321.892920 
 127.278000 35.931667 327.276213 
 127.278000 35.931778 334.501470 
 127.278000 35.931889 340.108223 
 127.278111 35.931889 346.414949 
 127.278111 35.932000 352.176992 
 127.278111 35.932111 357.321267 
 127.278222 35.932111 356.682087 
 127.278222 35.932222 364.577339 
 127.278222 35.932333 376.975890 
 127.278222 35.932444 385.832364 
 127.278333 35.932444 385.794000 
 127.278333 35.932555 391.565356 
 127.278333 35.932667 400.588626 
 127.278444 35.932667 400.561087 
 127.278444 35.932778 409.985880 
 127.278444 35.932889 420.124601 
 127.278556 35.932889 425.645797 
 127.278556 35.933000 430.253207 
 127.278556 35.933111 431.832494 
 127.278667 35.933111 434.481344 
 127.278667 35.933222 436.382608 
 127.278667 35.933333 435.446980 
 127.278778 35.933333 446.858496 
 127.278778 35.933444 444.923577 
 127.278778 35.933556 441.123409 
 127.278778 35.933667 440.061226 
 127.278889 35.933667 446.271835 
 127.278889 35.933778 446.177119 
 127.278889 35.933889 446.289576 
 127.279000 35.933889 457.502768 
 127.279000 35.934000 461.361491 
 127.279000 35.934111 468.224285 
 127.279111 35.934111 471.755582 
 127.279111 35.934222 472.474327 
 127.279111 35.934333 473.796516 
 127.279222 35.934333 473.528733 
 127.279222 35.934444 473.887422 
 127.279222 35.934556 471.754446 
 127.279333 35.934556 469.266266 
 127.279333 35.934667 460.060778 
 127.279333 35.934778 440.389874 
 127.279333 35.934889 430.250479 
 127.279444 35.934889 425.730507 
 127.279444 35.935000 420.323135 
 127.279444 35.935111 416.204901 
 127.279556 35.935111 412.898544 
 127.279556 35.935222 398.948823 
 127.279556 35.935333 387.381848 
 127.279667 35.935333 387.381716 
 127.279667 35.935444 383.359070 
 127.279667 35.935556 379.089114 
 127.279778 35.935556 379.740254 
 127.279778 35.935667 376.895896 
 127.279778 35.935778 372.719775 
 127.279889 35.935889 376.720413 
 127.279889 35.936000 371.783654 
 127.279889 35.936111 370.808512 
 127.280000 35.936111 376.975596 
 127.280000 35.936222 372.719800 
 127.280000 35.936333 372.108398 
 127.280111 35.936333 379.352920 
 127.280111 35.936444 376.976228 
 127.280111 35.936556 375.169409 
 127.280222 35.936556 376.976043 
 127.280222 35.936667 372.106270 
 127.280222 35.936778 365.283002 
 127.280333 35.936778 370.842552 
 127.280333 35.936889 368.742344 
 127.280333 35.937000 365.952897 
 127.280444 35.937111 361.914458 
 127.280444 35.937222 356.686388 
 127.280444 35.937333 351.099049 
 127.280556 35.937333 352.904172 
 127.280556 35.937444 345.952916 
 127.280556 35.937556 338.671669 
 127.280667 35.937556 344.754669 
 127.280667 35.937667 330.479353 
 127.280667 35.937778 312.474055 
 127.280778 35.937778 312.478700 
 127.280778 35.937889 304.433767 
 127.280778 35.938000 303.252671 
 127.280889 35.938000 300.695917 
 127.280889 35.938111 298.458603 
 127.280889 35.938222 295.240332 
 127.281000 35.938333 296.254679 
 127.281000 35.938444 297.245485 
 127.281000 35.938556 297.392036 
 127.281111 35.938556 303.135085 
 127.281111 35.938667 303.047948 
 127.281111 35.938778 303.713690 
 127.281222 35.938778 309.708222 
 127.281222 35.938889 309.332216 
 127.281222 35.939000 308.789204 
 127.281333 35.939000 310.746880 
 127.281333 35.939111 308.504448 
 127.281333 35.939222 303.912580 
 127.281444 35.939222 308.954032 
 127.281444 35.939333 306.864116 
 127.281444 35.939444 303.585834 
 127.281556 35.939444 302.459248 
 127.281556 35.939556 292.014292 
 127.281556 35.939667 281.279360 
 127.281556 35.939778 274.745026 
 127.281667 35.939778 277.629093 
 127.281667 35.939889 273.607521 
 127.281667 35.940000 269.507511 
 127.281778 35.940000 269.731228 
 127.281778 35.940111 267.398841 
 127.281778 35.940222 266.985279 
 127.281889 35.940222 270.832051 
 127.281889 35.940333 274.779201 
 127.281889 35.940445 277.836295 
 127.282000 35.940445 280.468310 
 127.282000 35.940556 282.929973 
 127.282000 35.940667 285.764995 
 127.282111 35.940667 299.417237 
 127.282111 35.940778 300.695903 
 127.282111 35.940889 299.420371 
 127.282111 35.941000 298.460581 
 127.282222 35.941000 308.658254 
 127.282222 35.941111 308.526816 
 127.282222 35.941222 309.181523 
 127.282333 35.941222 314.348058 
 127.282333 35.941333 311.729814 
 127.282333 35.941445 310.864414 
 127.282444 35.941445 319.452124 
 127.282444 35.941556 321.320467 
 127.282444 35.941667 323.176591 
 127.282556 35.941667 325.212556 
 127.282556 35.941778 328.842884 
 127.282556 35.941889 334.531940 
 127.282667 35.941889 341.741310 
 127.282667 35.942000 345.937666 
 127.282667 35.942111 347.898205 
 127.282667 35.942222 348.867522 
 127.282778 35.942222 356.953997 
 127.282778 35.942333 358.417319 
 127.282778 35.942444 359.688217 
 127.282889 35.942444 362.488628 
 127.282889 35.942556 363.452979 
 127.282889 35.942667 368.732545 
 127.283000 35.942667 379.979106 
 127.283000 35.942778 383.352676 
 127.283000 35.942889 384.377089 
 127.283111 35.942889 391.182925 
 127.283111 35.943000 393.146668 
 127.283111 35.943111 394.734279 
 127.283222 35.943111 401.969249 
 127.283222 35.943222 405.643873 
 127.283222 35.943333 409.108502 
 127.283333 35.943333 404.285034 
 127.283333 35.943444 404.232644 
 127.283333 35.943555 402.283345 
 127.283333 35.943667 397.710590 
 127.283444 35.943667 396.162217 
 127.283444 35.943778 387.370754 
 127.283444 35.943889 379.976334 
 127.283556 35.943889 371.809223 
 127.283556 35.944000 368.743971 
 127.283556 35.944111 364.798364 
 127.283667 35.944111 362.387431 
 127.283667 35.944222 359.709004 
 127.283667 35.944333 354.232318 
 127.283778 35.944333 344.940520 
 127.283778 35.944444 338.740780 
 127.283778 35.944555 336.053702 
 127.283889 35.944555 335.281746 
 127.283889 35.944667 332.685770 
 127.283889 35.944778 333.512675 
 127.283889 35.944889 332.483355 
 127.284000 35.944889 327.276432 
 127.284000 35.945000 328.883375 
 127.284000 35.945111 329.280522 
 127.284111 35.945111 324.792907 
 127.284111 35.945222 325.732963 
 127.284111 35.945333 322.296111 
 127.284222 35.945333 318.050644 
 127.284222 35.945444 315.419033 
 127.284222 35.945556 313.539187 
 127.284333 35.945556 310.864310 
 127.284333 35.945667 303.365711 
 127.284333 35.945778 302.458521 
 127.284444 35.945778 293.591438 
 127.284444 35.945889 292.026069 
 127.284444 35.946000 289.362517 
 127.284556 35.946000 285.818990 
 127.284556 35.946111 285.761743 
 127.284556 35.946222 287.177276 
 127.284556 35.946333 290.614805 
 127.284667 35.946333 287.846098 
 127.284667 35.946444 291.171417 
 127.284667 35.946556 293.496199 
 127.284778 35.946556 287.849805 
 127.284778 35.946667 291.220158 
 127.284778 35.946778 298.442832 
 127.284889 35.946778 290.670500 
 127.284889 35.946889 293.824111 
 127.284889 35.947000 293.906997 
 127.285000 35.947000 293.618838 
 127.285000 35.947111 292.019305 
 127.285000 35.947222 289.354375 
 127.285111 35.947222 283.095267 
 127.285111 35.947333 283.048702 
 127.285111 35.947444 284.018097 
 127.285222 35.947444 274.836274 
 127.285222 35.947556 276.490186 
 127.285222 35.947667 286.378565 
 127.285222 35.947778 299.416975 
 127.285333 35.947778 293.849281 
 127.285333 35.947889 297.246669 
 127.285333 35.948000 302.401156 
 127.285444 35.948000 297.245026 
 127.285444 35.948111 303.336160 
 127.285444 35.948222 310.856442 
 127.285556 35.948222 304.433789 
 127.285556 35.948333 304.854054 
 127.285556 35.948444 303.685207 
 127.285667 35.948444 290.762838 
 127.285667 35.948556 287.766586 
 127.285667 35.948667 285.759860 
 127.285778 35.948667 280.771842 
 127.285778 35.948778 279.960297 
 127.285778 35.948889 275.995095 
 127.285778 35.949000 274.835880 
 127.285889 35.949000 267.398005 
 127.285889 35.949111 267.398888 
 127.285889 35.949222 267.004176 
 127.286000 35.949222 263.491511 
 127.286000 35.949333 264.297682 
 127.286000 35.949444 262.723888 
 127.286111 35.949444 259.404436 
 127.286111 35.949556 259.373093 
 127.286111 35.949667 258.687681 
 127.286222 35.949667 249.897585 
 127.286222 35.949778 248.841848 
 127.286222 35.949889 245.484491 
 127.286333 35.949889 244.274139 
 127.286333 35.950000 239.134247 
 127.286333 35.950111 236.969461 
 127.286444 35.950111 231.143206 
 127.286444 35.950222 227.868690 
 127.286444 35.950333 224.222169 
 127.286444 35.950444 218.042614 
 127.286556 35.950444 212.789670 
 127.286556 35.950556 207.634029 
 127.286556 35.950667 202.210700 
 127.286667 35.950667 198.286063 
 127.286667 35.950778 191.852777 
 127.286667 35.950889 190.779302 
 127.286778 35.950889 187.172833 
 127.286778 35.951000 185.384105 
 127.286778 35.951111 182.292086 
 127.286889 35.951111 182.336096 
 127.286889 35.951222 175.782823 
 127.286889 35.951333 168.152708 
 127.287000 35.951333 168.092744 
 127.287000 35.951444 164.728225 
 127.287000 35.951556 163.512063 
 127.287111 35.951556 166.078002 
 127.287111 35.951667 160.344275 
 127.287111 35.951778 150.403694 
 127.287111 35.951889 141.109064 
 127.287222 35.951889 142.763773 
 127.287222 35.952000 141.599260 
 127.287222 35.952111 139.689633 
 127.287333 35.952111 139.748282 
 127.287333 35.952222 140.001088 
 127.287333 35.952333 140.006941 
 127.287444 35.952333 139.612425 
 127.287444 35.952445 140.128858 
 127.287444 35.952556 140.007737 
 127.287556 35.952556 140.007217 
 127.287556 35.952667 140.010418 
 127.287556 35.952778 140.029893 
 127.287667 35.952778 139.612139 
 127.287667 35.952889 139.612126 
 127.287667 35.953000 139.614424 
 127.287778 35.953000 139.617537 
 127.287778 35.953111 140.129045 
 127.287778 35.953222 140.009695 
 127.287778 35.953333 140.006504 
 127.287889 35.953333 140.002552 
 127.287889 35.953445 139.848237 
 127.287889 35.953556 139.689208 
 127.288000 35.953556 139.717923 
 127.288000 35.953667 139.689192 
 127.288000 35.953778 139.848602 
 127.288111 35.953778 140.004165 
 127.288111 35.953889 139.621832 
 127.288111 35.954000 138.999486 
 127.288222 35.954000 139.932423 
 127.288222 35.954111 140.129050 
 127.288222 35.954222 140.017346 
 127.288333 35.954222 140.035557 
 127.288333 35.954333 141.072368 
 127.288333 35.954445 141.749141 
 127.288444 35.954445 140.026658 
 127.288444 35.954556 141.743779 
 127.288444 35.954667 146.236267 
 127.288444 35.954778 150.425545 
 127.288556 35.954778 148.869658 
 127.288556 35.954889 151.083150 
 127.288556 35.955000 153.431159 
 127.288667 35.955000 151.929014 
 127.288667 35.955111 159.418770 
 127.288667 35.955222 164.452129 
 127.288778 35.955222 164.701475 
 127.288778 35.955333 168.415758 
 127.288778 35.955444 169.486609 
 127.288889 35.955444 171.613425 
 127.288889 35.955555 175.406460 
 127.288889 35.955667 182.060314 
 127.289000 35.955667 180.418396 
 127.289000 35.955778 186.107179 
 127.289000 35.955889 190.536711 
 127.289111 35.955889 186.098470 
 127.289111 35.956000 191.862208 
 127.289111 35.956111 197.940498 
 127.289111 35.956222 201.691133 
 127.289222 35.956222 196.065369 
 127.289222 35.956333 198.016807 
 127.289222 35.956444 200.520226 
 127.289333 35.956444 197.926174 
 127.289333 35.956555 201.757450 
 127.289333 35.956667 212.777806 
 127.289444 35.956667 212.781249 
 127.289444 35.956778 223.891390 
 127.289444 35.956889 237.744324 
 127.289556 35.956889 223.931987 
 127.289556 35.957000 237.023951 
 127.289556 35.957111 244.252949 
 127.289667 35.957111 233.083694 
 127.289667 35.957222 240.642825 
 127.289667 35.957333 247.383380 
 127.289778 35.957444 245.463534 
 127.289778 35.957555 248.173008 
 127.289778 35.957667 248.807658 
 127.289889 35.957667 240.646109 
 127.289889 35.957778 239.666638 
 127.289889 35.957889 239.696716 
 127.290000 35.957889 236.689785 
 127.290000 35.958000 236.596568 
 127.290000 35.958111 235.320636 
 127.290111 35.958111 232.445740 
 127.290111 35.958222 232.861090 
 127.290111 35.958333 233.899859 
 127.290222 35.958333 227.610002 
 127.290222 35.958444 227.868736 
 127.290222 35.958556 230.810497 
 127.290333 35.958556 227.006710 
 127.290333 35.958667 227.255837 
 127.290333 35.958778 228.743595 
 127.290444 35.958889 226.619081 
 127.290444 35.959000 226.601712 
 127.290444 35.959111 226.618534 
 127.290556 35.959111 222.080794 
 127.290556 35.959222 222.218567 
 127.290556 35.959333 223.398681 
 127.290667 35.959333 222.211428 
 127.290667 35.959444 223.379453 
 127.290667 35.959556 224.197508 
 127.290778 35.959556 223.397518 
 127.290778 35.959667 224.070961 
 127.290778 35.959778 226.601767 
 127.290889 35.959778 224.243158 
 127.290889 35.959889 224.374361 
 127.290889 35.960000 227.609176 
 127.291000 35.960000 227.256897 
 127.291000 35.960111 235.132329 
 127.291000 35.960222 242.380565 
 127.291111 35.960333 245.998892 
 127.291111 35.960444 254.752803 
 127.291111 35.960556 262.229562 
 127.291222 35.960556 260.005488 
 127.291222 35.960667 266.954375 
 127.291222 35.960778 271.807665 
 127.291333 35.960778 269.732904 
 127.291333 35.960889 274.642684 
 127.291333 35.961000 276.506535 
 127.291444 35.961000 274.836296 
 127.291444 35.961111 276.020887 
 127.291444 35.961222 277.579984 
 127.291556 35.961222 274.793562 
 127.291556 35.961333 277.578210 
 127.291556 35.961444 280.466443 
 127.291667 35.961444 272.899770 
 127.291667 35.961556 277.746105 
 127.291667 35.961667 285.033191 
 127.291778 35.961778 286.250151 
 127.291778 35.961889 292.018960 
 127.291778 35.962000 297.243684 
 127.291889 35.962000 299.649260 
 127.291889 35.962111 302.617432 
 127.291889 35.962222 308.463704 
 127.292000 35.962222 312.472116 
 127.292000 35.962333 324.148335 
 127.292000 35.962444 331.001307 
 127.292111 35.962444 332.487682 
 127.292111 35.962556 335.253288 
 127.292111 35.962667 342.590618 
 127.292222 35.962667 345.952436 
 127.292222 35.962778 351.114315 
 127.292222 35.962889 358.118634 
 127.292333 35.962889 354.386684 
 127.292333 35.963000 361.182757 
 127.292333 35.963111 365.091005 
 127.292444 35.963111 352.177021 
 127.292444 35.963222 361.496649 
 127.292444 35.963333 374.760120 
 127.292444 35.963444 380.982421 
 127.292556 35.963444 376.899610 
 127.292556 35.963556 379.820414 
 127.292556 35.963667 385.823599 
 127.292667 35.963667 389.040910 
 127.292667 35.963778 396.187053 
 127.292667 35.963889 397.710285 
 127.292778 35.963889 391.445088 
 127.292778 35.964000 391.086523 
 127.292778 35.964111 387.849278 
 127.292889 35.964111 387.231893 
 127.292889 35.964222 380.996887 
 127.292889 35.964333 372.295466 
 127.293000 35.964333 369.154936 
 127.293000 35.964444 365.238439 
 127.293000 35.964556 363.030057 
 127.293111 35.964667 347.898876 
 127.293111 35.964778 343.839295 
 127.293111 35.964889 344.206297 
 127.293222 35.964889 330.586459 
 127.293222 35.965000 338.116709 
 127.293222 35.965111 344.755430 
 127.293333 35.965111 338.099456 
 127.293333 35.965222 341.955489 
 127.293333 35.965333 353.886825 
 127.293444 35.965333 354.169420 
 127.293444 35.965445 376.973294 
 127.293444 35.965556 393.388611 
 127.293556 35.965556 393.139667 
 127.293556 35.965667 400.945187 
 127.293556 35.965778 404.331822 
 127.293667 35.965778 407.464178 
 127.293667 35.965889 409.808394 
 127.293667 35.966000 420.259507 
 127.293778 35.966111 429.085999 
 127.293778 35.966222 437.073099 
 127.293778 35.966333 444.777826 
 127.293889 35.966333 434.238484 
 127.293889 35.966445 437.851086 
 127.293889 35.966556 441.317927 
 127.294000 35.966556 430.251983 
 127.294000 35.966667 440.064049 
 127.294000 35.966778 453.008534 
 127.294111 35.966778 450.911246 
 127.294111 35.966889 461.298023 
 127.294111 35.967000 463.329662 
 127.294222 35.967000 458.456218 
 127.294222 35.967111 463.367234 
 127.294222 35.967222 469.152591 
 127.294333 35.967222 464.030591 
 127.294333 35.967333 463.316940 
 127.294333 35.967445 462.276901 
 127.294444 35.967445 461.252957 
 127.294444 35.967556 451.162916 
 127.294444 35.967667 437.057017 
 127.294444 35.967778 429.048801 
 127.294556 35.967778 436.110865 
 127.294556 35.967889 429.083208 
 127.294556 35.968000 416.202599 
 127.294667 35.968000 410.129369 
 127.294667 35.968111 398.922978 
 127.294667 35.968222 391.197218 
 127.294778 35.968222 393.976372 
 127.294778 35.968333 385.832602 
 127.294778 35.968444 372.101857 
 127.294889 35.968444 370.808524 
 127.294889 35.968555 362.489634 
 127.294889 35.968667 358.214605 
 127.295000 35.968667 359.554236 
 127.295000 35.968778 355.805786 
 127.295000 35.968889 352.184784 
 127.295111 35.968889 347.733760 
 127.295111 35.969000 345.003679 
 127.295111 35.969111 344.246162 
 127.295111 35.969222 342.588355 
 127.295222 35.969222 341.453007 
 127.295222 35.969333 337.038499 
 127.295222 35.969444 332.541028 
 127.295333 35.969444 330.604606 
 127.295333 35.969555 328.924731 
 127.295333 35.969667 327.277080 
 127.295444 35.969667 327.276220 
 127.295444 35.969778 325.397183 
 127.295444 35.969889 323.355016 
 127.295556 35.969889 321.885010 
 127.295556 35.970000 318.088937 
 127.295556 35.970111 314.216639 
 127.295667 35.970111 316.905320 
 127.295667 35.970222 311.509516 
 127.295667 35.970333 305.800479 
 127.295778 35.970333 303.756586 
 127.295778 35.970444 298.459734 
 127.295778 35.970556 296.489700 
 127.295778 35.970667 293.857299 
 127.295889 35.970667 295.356438 
 127.295889 35.970778 293.859411 
 127.295889 35.970889 293.436808 
 127.296000 35.970889 300.695914 
 127.296000 35.971000 299.707650 
 127.296000 35.971111 297.243714 
 127.296111 35.971111 303.741448 
 127.296111 35.971222 301.464037 
 127.296111 35.971333 298.468121 
 127.296222 35.971333 303.036262 
 127.296222 35.971444 299.988570 
 127.296222 35.971556 297.341890 
 127.296333 35.971556 298.647939 
 127.296333 35.971667 293.372321 
 127.296333 35.971778 285.837061 
 127.296444 35.971778 299.434564 
 127.296444 35.971889 296.038209 
 127.296444 35.972000 293.610153 
 127.296444 35.972111 292.784526 
 127.296556 35.972111 296.264326 
 127.296556 35.972222 293.849938 
 127.296556 35.972333 289.578876 
 127.296667 35.972333 296.466609 
 127.296667 35.972444 293.440478 
 127.296667 35.972556 291.630608 
 127.296778 35.972556 295.541769 
 127.296778 35.972667 289.356188 
 127.296778 35.972778 269.799744 
 127.296889 35.972778 285.032377 
 127.296889 35.972889 272.843738 
 127.296889 35.973000 265.144163 
 127.297000 35.973000 271.946694 
 127.297000 35.973111 263.041416 
 127.297000 35.973222 251.702140 
 127.297111 35.973222 269.710215 
 127.297111 35.973333 263.145200 
 127.297111 35.973444 254.987582 
 127.297111 35.973556 249.024839 
 127.297222 35.973556 253.691402 
 127.297222 35.973667 252.187999 
 127.297222 35.973778 249.402425 
 127.297333 35.973778 263.991872 
 127.297333 35.973889 258.588131 
 127.297333 35.974000 250.790358 
 127.297444 35.974000 258.685752 
 127.297444 35.974111 254.149910 
 127.297444 35.974222 248.998773 
 127.297556 35.974222 258.502628 
 127.297556 35.974333 258.687631 
 127.297556 35.974444 256.927082 
 127.297667 35.974444 263.490802 
 127.297667 35.974556 263.493095 
 127.297667 35.974667 264.308737 
 127.297778 35.974778 272.914394 
 127.297778 35.974889 271.106603 
 127.297778 35.975000 270.308595 
 127.297889 35.975000 269.812034 
 127.297889 35.975111 265.171666 
 127.297889 35.975222 260.151252 
 127.298000 35.975222 251.480160 
 127.298000 35.975333 252.422407 
 127.298000 35.975444 253.703657 
 127.298111 35.975444 245.639238 
 127.298111 35.975556 240.250200 
 127.298111 35.975667 228.265318 
 127.298222 35.975667 227.388568 
 127.298222 35.975778 220.697539 
 127.298222 35.975889 215.640277 
 127.298333 35.975889 208.315299 
 127.298333 35.976000 201.819048 
 127.298333 35.976111 196.814282 
 127.298333 35.976222 190.774964 
 127.298444 35.976222 193.052064 
 127.298444 35.976333 181.707956 
 127.298444 35.976444 172.419026 
 127.298556 35.976444 179.860197 
 127.298556 35.976556 173.693677 
 127.298556 35.976667 166.075299 
 127.298667 35.976667 183.543269 
 127.298667 35.976778 166.078213 
 127.298667 35.976889 143.306472 
 127.298778 35.976889 148.879865 
 127.298778 35.977000 134.230444 
 127.298778 35.977111 129.511361 
 127.298889 35.977111 138.963664 
 127.298889 35.977222 129.505865 
 127.298889 35.977333 121.743689 
 127.299000 35.977333 127.536470 
 127.299000 35.977445 120.723229 
 127.299000 35.977556 118.429276 
 127.299000 35.977667 118.473429 
 127.299111 35.977667 119.583307 
 127.299111 35.977778 119.471570 
 127.299111 35.977889 119.477070 
 127.299222 35.977889 120.066634 
 127.299222 35.978000 120.082159 
 127.299222 35.978111 120.584273 
 127.299333 35.978111 120.650926 
 127.299333 35.978222 120.726335 
 127.299333 35.978333 120.353891 
 127.299444 35.978333 120.559803 
 127.299444 35.978445 120.296217 
 127.299444 35.978556 121.716820 
 127.299556 35.978556 120.298725 
 127.299556 35.978667 121.392755 
 127.299556 35.978778 122.671680 
 127.299667 35.978889 121.428883 
 127.299667 35.979000 121.393950 
 127.299667 35.979111 122.386445 
 127.299778 35.979111 122.679871 
 127.299778 35.979222 122.106075 
 127.299778 35.979333 123.254913 
 127.299889 35.979333 123.244060 
 127.299889 35.979445 123.868250 
 127.299889 35.979556 124.153775 
 127.300000 35.979556 123.877522 
 127.300000 35.979667 125.033800 
 127.300000 35.979778 126.293092 
 127.300111 35.979778 124.839308 
 127.300111 35.979889 126.294968 
 127.300111 35.980000 128.366187 
 127.300222 35.980000 132.395478 
 127.300222 35.980111 136.838965 
 127.300222 35.980222 141.830744 
 127.300222 35.980333 151.111076 
 127.300333 35.980333 142.084328 
 127.300333 35.980444 154.682924 
 127.300333 35.980555 168.081051 
 127.300444 35.980555 164.248070 
 127.300444 35.980667 172.210785 
 127.300444 35.980778 175.775887 
 127.300556 35.980778 174.557695 
 127.300556 35.980889 180.545360 
 127.300556 35.981000 184.467905 
 127.300667 35.981000 186.108967 
 127.300667 35.981111 192.173336 
 127.300667 35.981222 201.112402 
 127.300778 35.981222 200.516674 
 127.300778 35.981333 205.251537 
 127.300778 35.981444 215.969378 
 127.300889 35.981444 220.559986 
 127.300889 35.981555 223.894274 
 127.300889 35.981667 230.563301 
 127.300889 35.981778 239.088698 
 127.301000 35.981778 236.708495 
 127.301000 35.981889 249.883788 
 127.301000 35.982000 260.505794 
 127.301111 35.982000 256.891214 
 127.301111 35.982111 266.372557 
 127.301111 35.982222 277.634013 
 127.301222 35.982222 272.837462 
 127.301222 35.982333 279.775889 
 127.301222 35.982444 279.782831 
 127.301333 35.982444 270.430243 
 127.301333 35.982555 267.398836 
 127.301333 35.982667 262.183916 
 127.301444 35.982667 261.830006 
 127.301444 35.982778 251.598202 
 127.301444 35.982889 242.664154 
 127.301444 35.983000 237.743556 
 127.301556 35.983000 236.553351 
 127.301556 35.983111 237.024392 
 127.301556 35.983222 240.844288 
 127.301667 35.983222 241.645383 
 127.301667 35.983333 241.526755 
 127.301667 35.983444 242.714164 
 127.301778 35.983444 236.877171 
 127.301778 35.983556 238.207571 
 127.301778 35.983667 241.697783 
 127.301889 35.983667 225.549761 
 127.301889 35.983778 224.200516 
 127.301889 35.983889 222.249969 
 127.302000 35.983889 215.636547 
 127.302000 35.984000 215.343507 
 127.302000 35.984111 213.918693 
 127.302111 35.984222 196.685949 
 127.302111 35.984333 196.805942 
 127.302111 35.984444 196.124093 
 127.302222 35.984444 192.300132 
 127.302222 35.984556 190.535795 
 127.302222 35.984667 192.576949 
 127.302333 35.984667 190.535961 
 127.302333 35.984778 195.969440 
 127.302333 35.984889 197.947567 
 127.302444 35.984889 197.872471 
 127.302444 35.985000 201.902081 
 127.302444 35.985111 208.338582 
 127.302556 35.985111 212.832747 
 127.302556 35.985222 222.060773 
 127.302556 35.985333 230.798858 
 127.302667 35.985333 232.537867 
 127.302667 35.985444 236.514298 
 127.302667 35.985556 239.832576 
 127.302667 35.985667 244.252882 
 127.302778 35.985667 254.624305 
 127.302778 35.985778 268.121131 
 127.302778 35.985889 278.797465 
 127.302889 35.985889 277.283817 
 127.302889 35.986000 282.795930 
 127.302889 35.986111 289.192191 
 127.303000 35.986111 292.801809 
 127.303000 35.986222 312.477622 
 127.303000 35.986333 324.798557 
 127.303111 35.986333 322.905911 
 127.303111 35.986444 327.298630 
 127.303111 35.986556 330.569655 
 127.303222 35.986556 329.756627 
 127.303222 35.986667 343.826191 
 127.303222 35.986778 354.477524 
 127.303222 35.986889 359.689636 
 127.303333 35.986889 362.406271 
 127.303333 35.987000 363.014758 
 127.303333 35.987111 365.293255 
 127.303444 35.987111 364.538014 
 127.303444 35.987222 364.538676 
 127.303444 35.987333 364.531881 
 127.303556 35.987333 359.698822 
 127.303556 35.987444 357.321665 
 127.303556 35.987556 356.839440 
 127.303667 35.987556 351.095440 
 127.303667 35.987667 350.736877 
 127.303667 35.987778 346.413253 
 127.303778 35.987778 334.506840 
 127.303778 35.987889 330.510869 
 127.303778 35.988000 328.918842 
 127.303889 35.988000 324.658355 
 127.303889 35.988111 321.701809 
 127.303889 35.988222 317.406100 
 127.303889 35.988333 312.477382 
 127.304000 35.988333 296.489273 
 127.304000 35.988444 293.849783 
 127.304000 35.988556 292.784816 
 127.304111 35.988556 288.384600 
 127.304111 35.988667 285.758723 
 127.304111 35.988778 277.696556 
 127.304222 35.988778 265.083370 
 127.304222 35.988889 256.903525 
 127.304222 35.989000 249.421371 
 127.304333 35.989000 241.516206 
 127.304333 35.989111 237.744214 
 127.304333 35.989222 236.663593 
 127.304444 35.989222 227.516406 
 127.304444 35.989333 218.281188 
 127.304444 35.989444 211.928088 
 127.304444 35.989556 209.141855 
 127.304556 35.989556 209.023280 
 127.304556 35.989667 209.160855 
 127.304556 35.989778 215.638874 
 127.304667 35.989778 217.020031 
 127.304667 35.989889 227.257285 
 127.304667 35.990000 236.717574 
 127.304778 35.990000 237.024550 
 127.304778 35.990111 242.808956 
 127.304778 35.990222 248.824297 
 127.304889 35.990222 255.023470 
 127.304889 35.990333 262.946845 
 127.304889 35.990445 274.835867 
 127.305000 35.990445 272.759373 
 127.305000 35.990556 284.694733 
 127.305000 35.990667 293.849592 
 127.305000 35.990778 300.822264 
 127.305111 35.990778 309.481449 
 127.305111 35.990889 313.539258 
 127.305111 35.991000 315.594937 
 127.305222 35.991000 324.796367 
 127.305222 35.991111 330.580276 
 127.305222 35.991222 335.949311 
 127.305333 35.991222 340.100193 
 127.305333 35.991333 341.937676 
 127.305333 35.991445 343.060149 
 127.305444 35.991445 341.349626 
 127.305444 35.991556 342.659298 
 127.305444 35.991667 345.952049 
 127.305556 35.991667 341.289568 
 127.305556 35.991778 345.952320 
 127.305556 35.991889 352.853213 
 127.305667 35.991889 347.622279 
 127.305667 35.992000 351.095143 
 127.305667 35.992111 352.176944 
 127.305667 35.992222 352.179842 
 127.305778 35.992222 355.231027 
 127.305778 35.992333 358.117785 
 127.305778 35.992445 360.178995 
 127.305889 35.992445 361.642069 
 127.305889 35.992556 365.290844 
 127.305889 35.992667 365.107540 
 127.306000 35.992667 375.165598 
 127.306000 35.992778 375.040229 
 127.306000 35.992889 372.108397 
 127.306111 35.992889 379.603461 
 127.306111 35.993000 379.807774 
 127.306111 35.993111 379.822242 
 127.306222 35.993111 383.247088 
 127.306222 35.993222 383.271391 
 127.306222 35.993333 384.373390 
 127.306222 35.993444 389.047036 
 127.306333 35.993444 394.970145 
 127.306333 35.993555 396.182598 
 127.306333 35.993667 400.280726 
 127.306444 35.993667 423.597484 
 127.306444 35.993778 429.008422 
 127.306444 35.993889 434.225000 
 127.306556 35.993889 440.024601 
 127.306556 35.994000 440.206966 
 127.306556 35.994111 441.063905 
 127.306667 35.994111 455.247346 
 127.306667 35.994222 458.352455 
 127.306667 35.994333 461.722993 
 127.306778 35.994333 463.316838 
 127.306778 35.994444 467.762439 
 127.306778 35.994555 473.526153 
 127.306778 35.994667 479.062937 
 127.306889 35.994667 480.681790 
 127.306889 35.994778 485.172833 
 127.306889 35.994889 489.397716 
 127.307000 35.994889 495.211123 
 127.307000 35.995000 497.517995 
 127.307000 35.995111 504.047684 
 127.307111 35.995111 503.818046 
 127.307111 35.995222 512.456647 
 127.307111 35.995333 526.052709 
 127.307222 35.995333 525.434261 
 127.307222 35.995444 534.479269 
 127.307222 35.995556 547.621396 
 127.307333 35.995556 546.864492 
 127.307333 35.995667 553.641203 
 127.307333 35.995778 560.984903 
 127.307444 35.995778 561.032093 
 127.307444 35.995889 571.713341 
 127.307444 35.996000 582.494525 
 127.307444 35.996111 589.483788 
 127.307556 35.996111 589.482051 
 127.307556 35.996222 589.486152 
 127.307556 35.996333 589.486327 
 127.307667 35.996333 589.465390 
 127.307667 35.996444 587.397382 
 127.307667 35.996556 582.473139 
 127.307778 35.996556 572.106001 
 127.307778 35.996667 571.675678 
 127.307778 35.996778 567.708045 
 127.307889 35.996778 561.001945 
 127.307889 35.996889 560.408596 
 127.307889 35.997000 553.766609 
 127.308000 35.997000 538.674599 
 127.308000 35.997111 533.388659 
 127.308000 35.997222 533.486800 
 127.308000 35.997333 538.734494 
 127.308111 35.997333 537.187994 
 127.308111 35.997444 546.697267 
 127.308111 35.997556 553.629210 
 127.308222 35.997556 540.336597 
 127.308222 35.997667 552.319197 
 127.308222 35.997778 554.165767 
 127.308333 35.997778 553.645176 
 127.308333 35.997889 554.084346 
 127.308333 35.998000 554.039615 
 127.308444 35.998000 553.640321 
 127.308444 35.998111 553.701002 
 127.308444 35.998222 553.680736 
 127.308556 35.998222 553.940440 
 127.308556 35.998333 554.051572 
 127.308556 35.998444 553.958273 
 127.308556 35.998556 553.752485 
 127.308667 35.998556 560.989642 
 127.308667 35.998667 560.986459 
 127.308667 35.998778 561.001114 
 127.308778 35.998778 571.603224 
 127.308778 35.998889 571.718862 
 127.308778 35.999000 573.648097 
 127.308889 35.999000 581.726592 
 127.308889 35.999111 582.459393 
 127.308889 35.999222 582.483112 
 127.309000 35.999222 589.486134 
 127.309000 35.999333 589.486032 
 127.309000 35.999444 589.447097 
 127.309111 35.999444 589.403017 
 127.309111 35.999556 571.736879 
 127.309111 35.999667 547.546509 
 127.309111 35.999778 532.728338 
 127.309222 35.999778 532.963013 
 127.309222 35.999889 525.857415 
 127.309222 36.000000 522.115224 
 127.309333 36.000000 520.551431 
 127.309333 36.000111 515.970122 
 127.309333 36.000222 507.746689 
 127.309444 36.000222 512.401172 
 127.309444 36.000333 500.885790 
 127.309444 36.000444 489.393045 
 127.309556 36.000444 496.384277 
 127.309556 36.000556 489.232309 
 127.309556 36.000667 481.099733 
 127.309667 36.000667 481.569851 
 127.309667 36.000778 479.049408 
 127.309667 36.000889 467.592037 
 127.309667 36.001000 451.779979 
 127.309778 36.001000 457.734342 
 127.309778 36.001111 451.776726 
 127.309778 36.001222 446.887735 
 127.309889 36.001222 444.501504 
 127.309889 36.001333 434.278827 
 127.309889 36.001444 421.790680 
 127.310000 36.001444 423.531521 
 127.310000 36.001556 417.014960 
 127.310000 36.001667 410.154643 
 127.310111 36.001667 405.643776 
 127.310111 36.001778 396.184901 
 127.310111 36.001889 392.026934 
 127.310222 36.001889 387.381934 
 127.310222 36.002000 386.750864 
 127.310222 36.002111 385.005516 
 127.310222 36.002222 379.351763 
 127.310333 36.002222 379.091500 
 127.310333 36.002333 372.282322 
 127.310333 36.002444 370.879541 
 127.310444 36.002444 376.976151 
 127.310444 36.002556 376.897108 
 127.310444 36.002667 376.896745 
 127.310556 36.002667 379.351763 
 127.310556 36.002778 379.667489 
 127.310556 36.002889 379.991443 
 127.310667 36.002889 380.667301 
 127.310667 36.003000 379.362644 
 127.310667 36.003111 379.818008 
 127.310778 36.003111 376.998548 
 127.310778 36.003222 376.886060 
 127.310778 36.003333 372.719820 
 127.310778 36.003445 364.534558 
 127.310889 36.003445 357.257695 
 127.310889 36.003556 342.875284 
 127.310889 36.003667 332.478677 
 127.311000 36.003667 325.330104 
 127.311000 36.003778 322.990262 
 127.311000 36.003889 321.320935 
 127.311111 36.003889 327.382688 
 127.311111 36.004000 324.700341 
 127.311111 36.004111 322.270376 
 127.311222 36.004111 332.541453 
 127.311222 36.004222 332.539213 
 127.311222 36.004333 330.591164 
 127.311333 36.004333 335.200933 
 127.311333 36.004445 332.540923 
 127.311333 36.004556 329.659796 
 127.311333 36.004667 323.925998 
 127.311444 36.004667 329.744851 
 127.311444 36.004778 327.435428 
 127.311444 36.004889 323.166843 
 127.311556 36.004889 326.823304 
 127.311556 36.005000 320.903397 
 127.311556 36.005111 313.252074 
 127.311667 36.005111 311.108709 
 127.311667 36.005222 304.430153 
 127.311667 36.005333 299.657851 
 127.311778 36.005333 301.622591 
 127.311778 36.005444 298.145136 
 127.311778 36.005555 288.384093 
 127.311889 36.005555 280.281736 
 127.311889 36.005667 270.317061 
 127.311889 36.005778 267.558906 
 127.311889 36.005889 268.732241 
 127.312000 36.005889 268.990205 
 127.312000 36.006000 269.538552 
 127.312000 36.006111 273.537710 
 127.312111 36.006111 272.843725 
 127.312111 36.006222 274.243249 
 127.312111 36.006333 275.995718 
 127.312222 36.006333 273.927711 
 127.312222 36.006444 278.674129 
 127.312222 36.006555 289.180491 
 127.312333 36.006555 284.792213 
 127.312333 36.006667 293.439836 
 127.312333 36.006778 301.525428 
 127.312444 36.006778 298.462041 
 127.312444 36.006889 307.231732 
 127.312444 36.007000 310.863715 
 127.312444 36.007111 314.200183 
 127.312556 36.007111 313.271064 
 127.312556 36.007222 323.163552 
 127.312556 36.007333 330.593237 
 127.312667 36.007333 336.150241 
 127.312667 36.007444 339.309658 
 127.312667 36.007555 341.452936 
 127.312778 36.007555 341.936168 
 127.312778 36.007667 347.899340 
 127.312778 36.007778 354.160997 
 127.312889 36.007778 359.688188 
 127.312889 36.007889 362.067599 
 127.312889 36.008000 365.293429 
 127.313000 36.008000 367.516599 
 127.313000 36.008111 371.788193 
 127.313000 36.008222 376.792461 
 127.313000 36.008333 379.986044 
 127.313111 36.008333 383.361007 
 127.313111 36.008444 387.369315 
 127.313111 36.008556 391.953652 
 127.313222 36.008556 394.735022 
 127.313222 36.008667 400.946583 
 127.313222 36.008778 407.263324 
 127.313333 36.008778 407.238002 
 127.313333 36.008889 410.745140 
 127.313333 36.009000 413.350618 
 127.313444 36.009000 417.453740 
 127.313444 36.009111 422.480143 
 127.313444 36.009222 427.734894 
 127.313556 36.009222 431.814078 
 127.313556 36.009333 437.052212 
 127.313556 36.009444 442.570519 
 127.313556 36.009556 448.876846 
 127.313667 36.009556 451.242246 
 127.313667 36.009667 454.669310 
 127.313667 36.009778 456.452076 
 127.313778 36.009778 457.650067 
 127.313778 36.009889 458.439161 
 127.313778 36.010000 460.120162 
 127.313889 36.010000 467.561171 
 127.313889 36.010111 469.266451 
 127.313889 36.010222 473.511325 
 127.314000 36.010222 478.173564 
 127.314000 36.010333 481.559366 
 127.314000 36.010444 486.686798 
 127.314111 36.010444 489.383934 
 127.314111 36.010556 493.898895 
 127.314111 36.010667 493.930869 
 127.314111 36.010778 493.931087 
 127.314222 36.010778 500.198097 
 127.314222 36.010889 496.503408 
 127.314222 36.011000 496.229702 
 127.314333 36.011000 500.881124 
 127.314333 36.011111 487.960779 
 127.314333 36.011222 471.755866 
 127.314444 36.011222 471.094712 
 127.314444 36.011333 457.638094 
 127.314444 36.011444 446.884285 
 127.314556 36.011444 451.162365 
 127.314556 36.011556 442.457489 
 127.314556 36.011667 436.398788 
 127.314667 36.011667 431.841753 
 127.314667 36.011778 425.744980 
 127.314667 36.011889 419.408688 
 127.314667 36.012000 413.083792 
 127.314778 36.012000 421.792753 
 127.314778 36.012111 413.080688 
 127.314778 36.012222 397.713514 
 127.314889 36.012222 396.165879 
 127.314889 36.012333 384.800217 
 127.314889 36.012444 379.305837 
 127.315000 36.012444 387.381721 
 127.315000 36.012556 379.793349 
 127.315000 36.012667 372.105700 
 127.315111 36.012667 376.975896 
 127.315111 36.012778 362.019907 
 127.315111 36.012889 351.133662 
 127.315222 36.012889 362.074400 
 127.315222 36.013000 351.148549 
 127.315222 36.013111 345.959577 
 127.315333 36.013111 359.688119 
 127.315333 36.013222 356.718292 
 127.315333 36.013333 357.160987 
 127.315333 36.013444 357.251545 
 127.315444 36.013444 361.629913 
 127.315444 36.013556 361.083410 
 127.315444 36.013667 359.689495 
 127.315556 36.013667 365.065935 
 127.315556 36.013778 362.003027 
 127.315556 36.013889 359.660772 
 127.315667 36.013889 362.489608 
 127.315667 36.014000 356.803253 
 127.315667 36.014111 348.897977 
 127.315778 36.014111 348.798351 
 127.315778 36.014222 335.938553 
 127.315778 36.014333 327.357992 
 127.315889 36.014333 321.701787 
 127.315889 36.014444 315.057261 
 127.315889 36.014556 313.539210 
 127.315889 36.014667 310.746878 
 127.316000 36.014667 308.510324 
 127.316000 36.014778 303.380939 
 127.316000 36.014889 302.408033 
 127.316111 36.014889 304.433791 
 127.316111 36.015000 303.505411 
 127.316111 36.015111 304.393556 
 127.316222 36.015111 317.405616 
 127.316222 36.015222 317.760444 
 127.316222 36.015333 318.050165 
 127.316333 36.015333 320.081963 
 127.316333 36.015445 317.774010 
 127.316333 36.015556 313.280320 
 127.316444 36.015556 317.747550 
 127.316444 36.015667 308.456105 
 127.316444 36.015778 295.350579 
 127.316444 36.015889 283.097725 
 127.316556 36.015889 280.714925 
 127.316556 36.016000 275.118697 
 127.316556 36.016111 270.438971 
 127.316667 36.016111 262.445325 
 127.316667 36.016222 258.574108 
 127.316667 36.016333 253.766728 
 127.316778 36.016333 254.878993 
 127.316778 36.016445 254.633073 
 127.316778 36.016556 256.891371 
 127.316889 36.016556 256.949565 
 127.316889 36.016667 258.687778 
 127.316889 36.016778 260.887445 
 127.317000 36.016778 271.087298 
 127.317000 36.016889 277.289012 
 127.317000 36.017000 280.192539 
 127.317000 36.017111 285.033472 
 127.317111 36.017111 285.842640 
 127.317111 36.017222 294.599108 
 127.317111 36.017333 306.843541 
 127.317222 36.017333 313.274048 
 127.317222 36.017445 319.641941 
 127.317222 36.017556 321.703424 
 127.317333 36.017556 322.965461 
 127.317333 36.017667 325.520928 
 127.317333 36.017778 328.926644 
 127.317444 36.017778 334.531060 
 127.317444 36.017889 338.262918 
 127.317444 36.018000 341.934761 
 127.317556 36.018000 340.493907 
 127.317556 36.018111 344.758558 
 127.317556 36.018222 349.835417 
 127.317667 36.018333 355.238256 
 127.317667 36.018444 359.712403 
 127.317667 36.018555 361.642121 
 127.317778 36.018555 354.910404 
 127.317778 36.018667 356.752292 
 127.317778 36.018778 360.451993 
 127.317889 36.018778 357.321474 
 127.317889 36.018889 364.030312 
 127.317889 36.019000 372.719816 
 127.318000 36.019000 369.167374 
 127.318000 36.019111 372.684605 
 127.318000 36.019222 379.085391 
 127.318111 36.019222 375.172430 
 127.318111 36.019333 380.983580 
 127.318111 36.019444 393.895409 
 127.318222 36.019444 393.166774 
 127.318222 36.019555 404.337302 
 127.318222 36.019667 421.780044 
 127.318222 36.019778 430.260115 
 127.318333 36.019778 430.249140 
 127.318333 36.019889 434.281878 
 127.318333 36.020000 436.388989 
 127.318444 36.020000 446.251063 
 127.318444 36.020111 445.902690 
 127.318444 36.020222 441.091809 
 127.318556 36.020222 441.139535 
 127.318556 36.020333 434.097317 
 127.318556 36.020444 427.728459 
 127.318667 36.020444 431.855055 
 127.318667 36.020555 430.251970 
 127.318667 36.020667 423.400150 
 127.318778 36.020667 429.375912 
 127.318778 36.020778 416.196690 
 127.318778 36.020889 407.619749 
 127.318778 36.021000 398.912454 
 127.318889 36.021000 404.005223 
 127.318889 36.021111 392.575965 
 127.318889 36.021222 379.086244 
 127.319000 36.021222 379.090453 
 127.319000 36.021333 372.681594 
 127.319000 36.021444 365.065537 
 127.319111 36.021444 369.127180 
 127.319111 36.021556 353.917631 
 127.319111 36.021667 340.134693 
 127.319222 36.021667 340.386676 
 127.319222 36.021778 337.182445 
 127.319222 36.021889 338.211987 
 127.319333 36.021889 351.095423 
 127.319333 36.022000 355.698941 
 127.319333 36.022111 356.711512 
 127.319444 36.022222 363.055678 
 127.319444 36.022333 364.544612 
 127.319444 36.022444 364.625997 
 127.319556 36.022444 369.155074 
 127.319556 36.022556 367.517333 
 127.319556 36.022667 362.007383 
 127.319667 36.022667 372.711838 
 127.319667 36.022778 364.709471 
 127.319667 36.022889 352.627110 
 127.319778 36.022889 362.471171 
 127.319778 36.023000 351.145913 
 127.319778 36.023111 338.975414 
 127.319889 36.023111 345.858963 
 127.319889 36.023222 340.956561 
 127.319889 36.023333 336.233192 
 127.320000 36.023333 337.524132 
 127.320000 36.023444 332.478604 
 127.320000 36.023556 328.923617 
 127.320000 36.023667 338.215558 
 127.320111 36.023667 341.309481 
 127.320111 36.023778 344.252477 
 127.320111 36.023889 352.852018 
 127.320222 36.023889 352.948630 
 127.320222 36.024000 368.120621 
 127.320222 36.024111 374.736830 
 127.320333 36.024111 379.823599 
 127.320333 36.024222 384.372877 
 127.320333 36.024333 387.386453 
 127.320444 36.024333 389.377762 
 127.320444 36.024444 390.183629 
 127.320444 36.024556 388.854663 
 127.320556 36.024556 400.944690 
 127.320556 36.024667 401.450400 
 127.320556 36.024778 402.306124 
 127.320556 36.024889 403.996411 
 127.320667 36.024889 409.101790 
 127.320667 36.025000 413.353838 
 127.320667 36.025111 420.325101 
 127.320778 36.025111 423.525587 
 127.320778 36.025222 429.047125 
 127.320778 36.025333 439.920397 
 127.320889 36.025333 441.184093 
 127.320889 36.025444 446.910100 
 127.320889 36.025556 450.865676 
 127.321000 36.025556 450.861629 
 127.321000 36.025667 466.192235 
 127.321000 36.025778 486.158773 
 127.321111 36.025778 489.001331 
 127.321111 36.025889 496.984489 
 127.321111 36.026000 500.893605 
 127.321222 36.026000 503.284079 
 127.321222 36.026111 505.187381 
 127.321222 36.026222 512.570324 
 127.321222 36.026333 525.860618 
 127.321333 36.026333 532.157488 
 127.321333 36.026444 533.687162 
 127.321333 36.026556 533.065806 
 127.321444 36.026556 535.663496 
 127.321444 36.026667 532.975573 
 127.321444 36.026778 525.876945 
 127.321556 36.026778 525.870331 
 127.321556 36.026889 518.977631 
 127.321556 36.027000 508.157394 
 127.321667 36.027000 504.200209 
 127.321667 36.027111 500.415682 
 127.321667 36.027222 496.422365 
 127.321778 36.027222 496.379009 
 127.321778 36.027333 489.427577 
 127.321778 36.027444 480.700976 
 127.321889 36.027444 463.319578 
 127.321889 36.027556 458.259344 
 127.321889 36.027667 450.863731 
 127.321889 36.027778 447.524819 
 127.322000 36.027778 444.742989 
 127.322000 36.027889 437.860186 
 127.322000 36.028000 436.417756 
 127.322111 36.028000 431.797828 
 127.322111 36.028111 430.357848 
 127.322111 36.028222 430.250704 
 127.322222 36.028222 422.723352 
 127.322222 36.028333 422.808028 
 127.322222 36.028445 422.838463 
 127.322333 36.028445 417.263537 
 127.322333 36.028556 416.905675 
 127.322333 36.028667 416.959774 
 127.322444 36.028667 400.946008 
 127.322444 36.028778 402.761049 
 127.322444 36.028889 407.620735 
 127.322556 36.028889 407.235071 
 127.322556 36.029000 409.809818 
 127.322556 36.029111 412.272875 
 127.322556 36.029222 407.997447 
 127.322667 36.029222 407.615363 
 127.322667 36.029333 400.948006 
 127.322667 36.029445 396.187448 
 127.322778 36.029445 393.137245 
 127.322778 36.029556 391.194853 
 127.322778 36.029667 387.381696 
 127.322889 36.029667 380.985048 
 127.322889 36.029778 376.893421 
 127.322889 36.029889 368.743806 
 127.323000 36.029889 365.100720 
 127.323000 36.030000 362.051993 
 127.323000 36.030111 359.688943 
 127.323111 36.030111 355.477315 
 127.323111 36.030222 354.362704 
 127.323111 36.030333 349.835469 
 127.323222 36.030333 343.786430 
 127.323222 36.030444 338.792890 
 127.323222 36.030555 333.492245 
 127.323222 36.030667 326.750460 
 127.323333 36.030667 313.540570 
 127.323333 36.030778 308.502740 
 127.323333 36.030889 303.674238 
 127.323444 36.030889 304.433587 
 127.323444 36.031000 300.828888 
 127.323444 36.031111 297.243716 
 127.323556 36.031111 298.145385 
 127.323556 36.031222 294.668646 
 127.323556 36.031333 293.438904 
 127.323667 36.031333 293.842135 
 127.323667 36.031444 293.440248 
 127.323667 36.031555 292.784984 
 127.323778 36.031555 298.444373 
 127.323778 36.031667 298.145464 
 127.323778 36.031778 298.145601 
 127.323889 36.031778 308.291485 
 127.323889 36.031889 309.701785 
 127.323889 36.032000 308.439839 
 127.323889 36.032111 310.892189 
 127.324000 36.032111 314.877682 
 127.324000 36.032222 316.992965 
 127.324000 36.032333 313.536834 
 127.324111 36.032333 324.803989 
 127.324111 36.032444 323.932290 
 127.324111 36.032555 314.499561 
 127.324222 36.032555 313.252141 
 127.324222 36.032667 303.736519 
 127.324222 36.032778 294.676072 
 127.324333 36.032778 295.088924 
 127.324333 36.032889 293.442251 
 127.324333 36.033000 293.113326 
 127.324444 36.033000 297.244798 
 127.324444 36.033111 298.136870 
 127.324444 36.033222 298.096623 
 127.324556 36.033333 302.421018 
 127.324556 36.033444 303.766583 
 127.324556 36.033556 302.471930 
 127.324667 36.033556 314.509541 
 127.324667 36.033667 310.746888 
 127.324667 36.033778 305.319125 
 127.324778 36.033778 313.258330 
 127.324778 36.033889 302.579835 
 127.324778 36.034000 295.357643 
 127.324889 36.034000 304.853937 
 127.324889 36.034111 297.641909 
 127.324889 36.034222 287.897123 
 127.325000 36.034222 300.693042 
 127.325000 36.034333 289.689316 
 127.325000 36.034444 277.847039 
 127.325111 36.034444 280.922009 
 127.325111 36.034556 277.310767 
 127.325111 36.034667 274.621388 
 127.325111 36.034778 272.788412 
 127.325222 36.034778 277.846319 
 127.325222 36.034889 272.837276 
 127.325222 36.035000 268.890375 
 127.325333 36.035000 277.629043 
 127.325333 36.035111 275.937803 
 127.325333 36.035222 271.106887 
 127.325444 36.035222 275.999019 
 127.325444 36.035333 269.811057 
 127.325444 36.035444 264.307529 
 127.325556 36.035444 265.234529 
 127.325556 36.035556 262.760116 
 127.325556 36.035667 260.920488 
 127.325667 36.035667 263.137938 
 127.325667 36.035778 261.922391 
 127.325667 36.035889 259.402693 
 127.325778 36.035889 266.380996 
 127.325778 36.036000 263.986070 
 127.325778 36.036111 262.702300 
 127.325778 36.036222 258.754389 
 127.325889 36.036222 264.274438 
 127.325889 36.036333 262.374232 
 127.325889 36.036444 258.687018 
 127.326000 36.036444 261.902461 
 127.326000 36.036556 260.005426 
 127.326000 36.036667 254.621425 
 127.326111 36.036667 256.111009 
 127.326111 36.036778 249.425368 
 127.326111 36.036889 244.588344 
 127.326222 36.036889 245.775108 
 127.326222 36.037000 244.273962 
 127.326222 36.037111 242.672439 
 127.326333 36.037111 241.646797 
 127.326333 36.037222 239.619767 
 127.326333 36.037333 236.650172 
 127.326333 36.037444 233.415514 
 127.326444 36.037444 237.029228 
 127.326444 36.037556 235.714489 
 127.326444 36.037667 232.441203 
 127.326556 36.037667 233.083669 
 127.326556 36.037778 233.423380 
 127.326556 36.037889 237.742702 
 127.326667 36.037889 236.717534 
 127.326667 36.038000 241.519105 
 127.326667 36.038111 247.194157 
 127.326778 36.038111 239.232120 
 127.326778 36.038222 244.273001 
 127.326778 36.038333 251.464102 
 127.326889 36.038333 250.202756 
 127.326889 36.038444 253.856000 
 127.326889 36.038556 256.949415 
 127.327000 36.038556 252.336050 
 127.327000 36.038667 256.251395 
 127.327000 36.038778 263.078062 
 127.327000 36.038889 267.562207 
 127.327111 36.038889 262.229177 
 127.327111 36.039000 265.056781 
 127.327111 36.039111 267.328077 
 127.327222 36.039111 263.155596 
 127.327222 36.039222 264.076214 
 127.327222 36.039333 268.496287 
 127.327333 36.039333 265.374817 
 127.327333 36.039444 274.744502 
 127.327333 36.039556 280.859790 
 127.327444 36.039556 277.629042 
 127.327444 36.039667 281.288461 
 127.327444 36.039778 283.029735 
 127.327556 36.039778 274.798262 
 127.327556 36.039889 279.190717 
 127.327556 36.040000 292.784899 
 127.327556 36.040111 308.297573 
 127.327667 36.040111 299.424623 
 127.327667 36.040222 302.996381 
 127.327667 36.040333 307.052137 
 127.327778 36.040333 303.291658 
 127.327778 36.040445 308.913702 
 127.327778 36.040556 317.871972 
 127.327889 36.040556 307.933185 
 127.327889 36.040667 313.546497 
 127.327889 36.040778 317.794736 
 127.328000 36.040778 314.343391 
 127.328000 36.040889 315.924159 
 127.328000 36.041000 320.074899 
 127.328111 36.041000 317.564798 
 127.328111 36.041111 328.926861 
 127.328111 36.041222 338.673152 
 127.328111 36.041333 344.122752 
 127.328222 36.041333 333.510938 
 127.328222 36.041445 336.150037 
 127.328222 36.041556 341.033626 
 127.328333 36.041556 336.243073 
 127.328333 36.041667 339.316765 
 127.328333 36.041778 338.175053 
 127.328444 36.041778 320.903651 
 127.328444 36.041889 311.115780 
 127.328444 36.042000 304.858533 
 127.328556 36.042000 310.750384 
 127.328556 36.042111 303.364655 
 127.328556 36.042222 297.249386 
 127.328667 36.042222 279.775740 
 127.328667 36.042333 274.744495 
 127.328667 36.042445 271.813221 
 127.328778 36.042556 264.294086 
 127.328778 36.042667 256.761587 
 127.328778 36.042778 252.335969 
 127.328889 36.042778 244.273929 
 127.328889 36.042889 244.248130 
 127.328889 36.043000 243.609945 
 127.329000 36.043000 233.091739 
 127.329000 36.043111 231.154491 
 127.329000 36.043222 226.488163 
 127.329111 36.043222 214.400519 
 127.329111 36.043333 207.492559 
 127.329111 36.043444 201.990129 
 127.329222 36.043444 190.549680 
 127.329222 36.043555 189.142171 
 127.329222 36.043667 187.683058 
 127.329333 36.043667 184.422075 
 127.329333 36.043778 183.633584 
 127.329333 36.043889 183.595646 
 127.329333 36.044000 183.544017 
 127.329444 36.044000 184.467366 
 127.329444 36.044111 184.565011 
 127.329444 36.044222 185.384356 
 127.329556 36.044222 193.992202 
 127.329556 36.044333 194.850045 
 127.329556 36.044444 196.042847 
 127.329667 36.044444 200.508309 
 127.329667 36.044555 200.560040 
 127.329667 36.044667 201.769321 
 127.329778 36.044667 207.817917 
 127.329778 36.044778 207.628785 
 127.329778 36.044889 207.469314 
 127.329889 36.044889 215.637159 
 127.329889 36.045000 215.636427 
 127.329889 36.045111 215.635138 
 127.329889 36.045222 214.527591 
 127.330000 36.045222 216.966698 
 127.330000 36.045333 217.344948 
 127.330000 36.045444 215.970441 
 127.330111 36.045444 217.091194 
 127.330111 36.045555 212.601438 
 127.330111 36.045667 203.498103 
 127.330222 36.045667 215.604908 
 127.330222 36.045778 202.214537 
 127.330222 36.045889 190.779145 
 127.330333 36.045889 196.036896 
 127.330333 36.046000 185.628903 
 127.330333 36.046111 175.495708 
 127.330444 36.046111 182.291407 
 127.330444 36.046222 173.769518 
 127.330444 36.046333 172.112330 
 127.330556 36.046444 175.787541 
 127.330556 36.046556 184.467107 
 127.330556 36.046667 194.957574 
 127.330667 36.046667 187.165790 
 127.330667 36.046778 196.807395 
 127.330667 36.046889 208.107483 
 127.330778 36.046889 207.518042 
 127.330778 36.047000 215.613064 
 127.330778 36.047111 221.349410 
 127.330889 36.047111 217.019286 
 127.330889 36.047222 224.169180 
 127.330889 36.047333 231.146407 
 127.331000 36.047333 225.495008 
 127.331000 36.047444 233.088228 
 127.331000 36.047556 237.707181 
 127.331111 36.047556 230.566600 
 127.331111 36.047667 230.815088 
 127.331111 36.047778 230.786021 
 127.331111 36.047889 233.104638 
 127.331222 36.047889 228.432587 
 127.331222 36.048000 236.703358 
 127.331222 36.048111 244.247367 
 127.331333 36.048111 238.166925 
 127.331333 36.048222 242.808400 
 127.331333 36.048333 245.928550 
 127.331444 36.048333 240.255077 
 127.331444 36.048444 240.635212 
 127.331444 36.048556 240.254720 
 127.331556 36.048556 235.062513 
 127.331556 36.048667 233.090571 
 127.331556 36.048778 231.629783 
 127.331667 36.048778 230.806577 
 127.331667 36.048889 230.560730 
 127.331667 36.049000 225.545154 
 127.331667 36.049111 220.698949 
 127.331778 36.049111 217.025202 
 127.331778 36.049222 214.388636 
 127.331778 36.049333 214.184960 
 127.331889 36.049333 205.223994 
 127.331889 36.049444 209.021450 
 127.331889 36.049556 212.788659 
 127.332000 36.049556 205.689761 
 127.332000 36.049667 204.664752 
 127.332000 36.049778 205.434312 
 127.332111 36.049778 196.811484 
 127.332111 36.049889 192.800937 
 127.332111 36.050000 188.721558 
 127.332222 36.050000 187.827524 
 127.332222 36.050111 185.403741 
 127.332222 36.050222 184.491873 
 127.332333 36.050222 177.730481 
 127.332333 36.050333 186.107432 
 127.332333 36.050444 194.047778 
 127.332333 36.050556 197.911369 
 127.332444 36.050556 192.576303 
 127.332444 36.050667 196.051865 
 127.332444 36.050778 201.691544 
 127.332556 36.050778 192.273863 
 127.332556 36.050889 199.469203 
 127.332556 36.051000 202.203841 
 127.332667 36.051000 196.904547 
 127.332667 36.051111 197.948543 
 127.332667 36.051222 196.708132 
 127.332778 36.051222 189.879642 
 127.332778 36.051333 182.905118 
 127.332778 36.051444 177.583520 
 127.332889 36.051444 174.557530 
 127.332889 36.051556 169.477489 
 127.332889 36.051667 164.868248 
 127.332889 36.051778 160.345169 
 127.333000 36.051778 154.685141 
 127.333000 36.051889 154.593960 
 127.333000 36.052000 154.591269 
 127.333111 36.052000 156.651290 
 127.333111 36.052111 157.490618 
 127.333111 36.052222 158.638259 
 127.333222 36.052222 164.299998 
 127.333222 36.052333 164.859560 
 127.333222 36.052444 163.407384 
 127.333333 36.052444 168.083767 
 127.333333 36.052556 166.681415 
 127.333333 36.052667 164.859558 
 127.333444 36.052667 175.787574 
 127.333444 36.052778 174.557695 
 127.333444 36.052889 171.795806 
 127.333556 36.052889 174.563169 
 127.333556 36.053000 169.872864 
 127.333556 36.053111 162.083783 
 127.333556 36.053222 154.677143 
 127.333667 36.053222 162.117466 
 127.333667 36.053333 158.872138 
 127.333667 36.053445 154.683292 
 127.333778 36.053445 157.503461 
 127.333778 36.053556 156.667490 
 127.333778 36.053667 157.498890 
 127.333889 36.053667 164.895586 
 127.333889 36.053778 164.234089 
 127.333889 36.053889 166.674891 
 127.334000 36.053889 172.577537 
 127.334000 36.054000 173.722250 
 127.334000 36.054111 178.882676 
 127.334111 36.054111 188.467765 
 127.334111 36.054222 190.749816 
 127.334111 36.054333 191.852643 
 127.334111 36.054445 201.707116 
 127.334222 36.054445 220.027461 
 127.334222 36.054556 230.786568 
 127.334222 36.054667 235.134224 
 127.334333 36.054667 233.771547 
 127.334333 36.054778 234.177907 
 127.334333 36.054889 230.811124 
 127.334444 36.054889 234.098835 
 127.334444 36.055000 230.564343 
 127.334444 36.055111 224.232988 
 127.334556 36.055111 233.083848 
 127.334556 36.055222 224.238848 
 127.334556 36.055333 212.787371 
 127.334667 36.055333 217.025424 
 127.334667 36.055444 210.628848 
 127.334667 36.055556 209.021274 
 127.334667 36.055667 210.765080 
 127.334778 36.055667 220.026892 
 127.334778 36.055778 225.543959 
 127.334778 36.055889 230.815317 
 127.334889 36.055889 232.375533 
 127.334889 36.056000 234.946163 
 127.334889 36.056111 236.663999 
 127.335000 36.056111 239.698587 
 127.335000 36.056222 238.239576 
 127.335000 36.056333 240.646185 
 127.335111 36.056333 253.708564 
 127.335111 36.056444 254.939646 
 127.335111 36.056555 256.251208 
 127.335222 36.056555 260.809389 
 127.335222 36.056667 263.313347 
 127.335222 36.056778 267.395514 
 127.335333 36.056778 273.076294 
 127.335333 36.056889 277.629042 
 127.335333 36.057000 289.689882 
 127.335333 36.057111 303.765781 
 127.335444 36.057111 310.863166 
 127.335444 36.057222 322.851436 
 127.335444 36.057333 328.348576 
 127.335556 36.057333 330.467962 
 127.335556 36.057444 335.229124 
 127.335556 36.057555 337.202813 
 127.335667 36.057555 347.260011 
 127.335667 36.057667 347.897808 
 127.335667 36.057778 342.878153 
 127.335778 36.057778 351.305113 
 127.335778 36.057889 347.897246 
 127.335778 36.058000 340.952707 
 127.335889 36.058000 354.287064 
 127.335889 36.058111 347.861053 
 127.335889 36.058222 342.659496 
 127.336000 36.058222 354.411932 
 127.336000 36.058333 352.177066 
 127.336000 36.058444 352.177055 
 127.336000 36.058556 353.885512 
 127.336111 36.058556 358.791321 
 127.336111 36.058667 363.031521 
 127.336111 36.058778 368.731353 
 127.336222 36.058778 384.372246 
 127.336222 36.058889 386.774354 
 127.336222 36.059000 386.773308 
 127.336333 36.059000 392.989172 
 127.336333 36.059111 391.051680 
 127.336333 36.059222 384.946217 
 127.336444 36.059222 393.941879 
 127.336444 36.059333 386.278223 
 127.336444 36.059444 372.708420 
 127.336556 36.059444 368.743053 
 127.336556 36.059556 349.835242 
 127.336556 36.059667 339.287387 
 127.336667 36.059778 325.957389 
 127.336667 36.059889 317.693778 
 127.336667 36.060000 310.746898 
 127.336778 36.060000 307.236263 
 127.336778 36.060111 301.622733 
 127.336778 36.060222 295.538058 
 127.336889 36.060222 293.440007 
 127.336889 36.060333 277.629075 
 127.336889 36.060444 266.383470 
 127.337000 36.060444 263.984147 
 127.337000 36.060556 262.026229 
 127.337000 36.060667 256.951442 
 127.337111 36.060667 260.504232 
 127.337111 36.060778 256.110509 
 127.337111 36.060889 252.341330 
 127.337222 36.060889 256.964422 
 127.337222 36.061000 254.649578 
 127.337222 36.061111 253.376615 
 127.337333 36.061222 260.922592 
 127.337333 36.061333 261.815824 
 127.337333 36.061444 261.916764 
 127.337444 36.061444 266.875088 
 127.337444 36.061556 266.683216 
 127.337444 36.061667 266.994365 
 127.337556 36.061667 277.836461 
 127.337556 36.061778 280.466838 
 127.337556 36.061889 287.102081 
 127.337667 36.061889 282.708564 
 127.337667 36.062000 289.312356 
 127.337667 36.062111 297.625313 
 127.337778 36.062111 293.796864 
 127.337778 36.062222 298.096753 
 127.337778 36.062333 300.691632 
 127.337889 36.062333 290.675017 
 127.337889 36.062444 290.650465 
 127.337889 36.062556 286.378441 
 127.338000 36.062556 277.597254 
 127.338000 36.062667 268.579199 
 127.338000 36.062778 260.680979 
 127.338000 36.062889 257.079731 
 127.338111 36.062889 247.243709 
 127.338111 36.063000 245.975871 
 127.338111 36.063111 241.160774 
 127.338222 36.063111 236.842912 
 127.338222 36.063222 224.242336 
 127.338222 36.063333 204.769691 
 127.338333 36.063333 201.999741 
 127.338333 36.063444 196.479960 
 127.338333 36.063556 193.251099 
 127.338444 36.063556 193.158561 
 127.338444 36.063667 183.601565 
 127.338444 36.063778 175.320219 
 127.338556 36.063778 175.348868 
 127.338556 36.063889 172.213107 
 127.338556 36.064000 168.317890 
 127.338667 36.064000 164.858314 
 127.338667 36.064111 160.245066 
 127.338667 36.064222 154.696051 
 127.338667 36.064333 150.460971 
 127.338778 36.064333 150.488611 
 127.338778 36.064444 147.126154 
 127.338778 36.064556 146.553437 
 127.338889 36.064556 146.866081 
 127.338889 36.064667 145.773379 
 127.338889 36.064778 144.959321 
 127.339000 36.064778 144.958805 
 127.339000 36.064889 142.637507 
 127.339000 36.065000 139.747006 
 127.339111 36.065000 141.573441 
 127.339111 36.065111 139.778079 
 127.339111 36.065222 138.767673 
 127.339222 36.065222 140.129050 
 127.339222 36.065333 138.963971 
 127.339222 36.065445 138.538224 
 127.339333 36.065445 138.541749 
 127.339333 36.065556 138.559209 
 127.339333 36.065667 138.557812 
 127.339333 36.065778 138.558915 
 127.339444 36.065778 138.688040 
 127.339444 36.065889 138.661447 
 127.339444 36.066000 138.539625 
 127.339556 36.066000 138.559155 
 127.339556 36.066111 138.558829 
 127.339556 36.066222 139.621516 
 127.339667 36.066222 139.956465 
 127.339667 36.066333 145.581598 
 127.339667 36.066445 155.753219 
 127.339778 36.066445 149.197344 
 127.339778 36.066556 157.897571 
 127.339778 36.066667 164.859330 
 127.339889 36.066667 163.944972 
 127.339889 36.066778 166.091526 
 127.339889 36.066889 168.156700 
 127.340000 36.066889 158.873102 
 127.340000 36.067000 157.896935 
 127.340000 36.067111 162.114472 
 127.340111 36.067222 163.411846 
 127.340111 36.067333 164.230439 
 127.340111 36.067445 166.078068 
 127.340222 36.067445 160.880462 
 127.340222 36.067556 159.402774 
 127.340222 36.067667 158.305943 
 127.340333 36.067667 153.399819 
 127.340333 36.067778 154.684502 
 127.340333 36.067889 158.873302 
 127.340444 36.067889 152.082687 
 127.340444 36.068000 161.853982 
 127.340444 36.068111 169.883999 
 127.340556 36.068111 156.718225 
 127.340556 36.068222 159.240400 
 127.340556 36.068333 163.510469 
 127.340667 36.068333 157.899070 
 127.340667 36.068444 160.451550 
 127.340667 36.068555 163.919631 
 127.340778 36.068555 161.877001 
 127.340778 36.068667 163.407974 
 127.340778 36.068778 163.958253 
 127.340778 36.068889 163.463898 
 127.340889 36.068889 154.613668 
 127.340889 36.069000 156.650093 
 127.340889 36.069111 164.818380 
 127.341000 36.069111 159.414295 
 127.341000 36.069222 161.854243 
 127.341000 36.069333 162.022428 
 127.341111 36.069333 156.719410 
 127.341111 36.069444 157.620866 
 127.341111 36.069555 161.279555 
 127.341222 36.069555 159.099733 
 127.341222 36.069667 161.280127 
 127.341222 36.069778 164.893983 
 127.341333 36.069778 159.419221 
 127.341333 36.069889 161.855350 
 127.341333 36.070000 166.075481 
 127.341444 36.070000 158.349074 
 127.341444 36.070111 160.545863 
 127.341444 36.070222 164.230293 
 127.341444 36.070333 169.220746 
 127.341556 36.070333 168.407665 
 127.341556 36.070444 169.220422 
 127.341556 36.070555 169.862510 
 127.341667 36.070555 167.325338 
 127.341667 36.070667 167.439883 
 127.341667 36.070778 166.739740 
 127.341778 36.070778 163.634690 
 127.341778 36.070889 164.078075 
 127.341778 36.071000 163.548887 
 127.341889 36.071000 159.384453 
 127.341889 36.071111 160.153349 
 127.341889 36.071222 162.185704 
 127.342000 36.071222 163.960442 
 127.342000 36.071333 164.857703 
 127.342000 36.071444 164.891686 
 127.342111 36.071444 164.795880 
 127.342111 36.071556 166.674941 
 127.342111 36.071667 169.220127 
 127.342111 36.071778 169.698356 
 127.342222 36.071778 170.910202 
 127.342222 36.071889 171.350611 
 127.342222 36.072000 171.620853 
 127.342333 36.072000 175.404453 
 127.342333 36.072111 174.772969 
 127.342333 36.072222 173.872000 
 127.342444 36.072222 174.995291 
 127.342444 36.072333 175.015608 
 127.342444 36.072444 175.781544 
 127.342556 36.072444 178.994394 
 127.342556 36.072556 181.707594 
 127.342556 36.072667 182.355513 
 127.342667 36.072667 181.708400 
 127.342667 36.072778 183.541590 
 127.342667 36.072889 190.537011 
 127.342778 36.072889 196.814530 
 127.342778 36.073000 201.691130 
 127.342778 36.073111 210.660240 
 127.342778 36.073222 223.928445 
 127.342889 36.073222 227.597917 
 127.342889 36.073333 232.891559 
 127.342889 36.073444 233.083927 
 127.343000 36.073444 236.637030 
 127.343000 36.073556 236.973660 
 127.343000 36.073667 237.743480 
 127.343111 36.073667 241.648212 
 127.343111 36.073778 244.186485 
 127.343111 36.073889 248.420485 
 127.343222 36.073889 259.444480 
 127.343222 36.074000 261.958741 
 127.343222 36.074111 263.182448 
 127.343333 36.074111 266.995428 
 127.343333 36.074222 267.778118 
 127.343333 36.074333 270.308811 
 127.343444 36.074333 283.104226 
 127.343444 36.074444 289.358018 
 127.343444 36.074556 297.642224 
 127.343444 36.074667 300.073214 
 127.343556 36.074667 302.394681 
 127.343556 36.074778 305.319344 
 127.343556 36.074889 308.922396 
 127.343667 36.074889 311.433399 
 127.343667 36.075000 313.861989 
 127.343667 36.075111 316.633315 
 127.343778 36.075111 318.088922 
 127.343778 36.075222 321.893084 
 127.343778 36.075333 324.415269 
 127.343889 36.075333 328.218285 
 127.343889 36.075444 330.435087 
 127.343889 36.075556 334.530996 
 127.344000 36.075556 332.478967 
 127.344000 36.075667 337.037881 
 127.344000 36.075778 342.588356 
 127.344000 36.075889 345.552867 
 127.344111 36.075889 342.590720 
 127.344111 36.076000 345.957938 
 127.344111 36.076111 347.945099 
 127.344222 36.076111 347.638549 
 127.344222 36.076222 347.173045 
 127.344222 36.076333 346.437818 
 127.344333 36.076333 345.857744 
 127.344333 36.076444 344.940820 
 127.344333 36.076556 343.859614 
 127.344444 36.076556 347.886243 
 127.344444 36.076667 342.652687 
 127.344444 36.076778 335.628078 
 127.344556 36.076778 335.289900 
 127.344556 36.076889 330.463238 
 127.344556 36.077000 327.277381 
 127.344667 36.077000 322.851570 
 127.344667 36.077111 321.702099 
 127.344667 36.077222 321.008512 
 127.344667 36.077333 315.595617 
 127.344778 36.077333 317.774876 
 127.344778 36.077444 316.977366 
 127.344778 36.077556 314.509535 
 127.344889 36.077556 317.775768 
 127.344889 36.077667 321.010765 
 127.344889 36.077778 323.469329 
 127.345000 36.077778 328.924723 
 127.345000 36.077889 330.514975 
 127.345000 36.078000 335.215386 
 127.345111 36.078000 340.056104 
 127.345111 36.078111 343.863254 
 127.345111 36.078222 345.947451 
 127.345222 36.078222 352.805609 
 127.345222 36.078333 352.174105 
 127.345222 36.078445 352.177008 
 127.345222 36.078556 351.143979 
 127.345333 36.078556 352.283987 
 127.345333 36.078667 349.800056 
 127.345333 36.078778 344.316846 
 127.345444 36.078778 345.909137 
 127.345444 36.078889 342.613550 
 127.345444 36.079000 340.135922 
 127.345556 36.079000 342.807324 
 127.345556 36.079111 341.897657 
 127.345556 36.079222 340.540626 
 127.345667 36.079222 343.794212 
 127.345667 36.079333 342.608668 
 127.345667 36.079445 342.658893 
 127.345667 36.079556 341.232399 
 127.345778 36.079556 342.659464 
 127.345778 36.079667 341.936768 
 127.345778 36.079778 340.951727 
 127.345889 36.079778 336.737250 
 127.345889 36.079889 336.055146 
 127.345889 36.080000 335.238409 
 127.346000 36.080000 333.510592 
 127.346000 36.080111 330.234857 
 127.346000 36.080222 327.382485 
 127.346000 36.080333 324.804788 
 127.346111 36.080333 310.749079 
 127.346111 36.080444 309.735259 
 127.346111 36.080556 306.064075 
 127.346222 36.080556 304.164128 
 127.346222 36.080667 301.615362 
 127.346222 36.080778 298.097081 
 127.346333 36.080778 291.071185 
 127.346333 36.080889 290.674148 
 127.346333 36.081000 289.521794 
 127.346333 36.081111 289.293697 
 127.346444 36.081111 279.190669 
 
