# Supplementary material for: Terrain Referenced Navigation Using a Multilayer Radial Basis Function-Based Extreme Learning Machine
Source: Hindawi journal article supplement (doi:10.1155/2019/9142694), 2019-07-11
Supplement: f1 [file 9142694.f1.zip › 9142694_Supplementary information files/CompareMatchingResults_180909/ML_RBF_ELMTrainResult.dat]

127.173222 35.703000 347.603239 
 127.173333 35.703000 347.597631 
 127.173444 35.703000 348.879025 
 127.173556 35.703000 352.853185 
 127.173667 35.703000 354.176587 
 127.173778 35.703000 363.038106 
 127.173889 35.703000 372.322944 
 127.174000 35.703000 374.807348 
 127.174111 35.703000 375.172430 
 127.174222 35.703000 375.169552 
 127.174333 35.703000 378.497037 
 127.174444 35.703000 389.044258 
 127.174556 35.703000 394.690923 
 127.173333 35.703222 348.534918 
 127.173444 35.703222 349.440194 
 127.173556 35.703222 351.837898 
 127.173667 35.703222 357.245559 
 127.173778 35.703222 368.634329 
 127.173889 35.703222 374.931658 
 127.174000 35.703222 376.902985 
 127.174111 35.703222 374.736836 
 127.174222 35.703222 374.737246 
 127.174333 35.703222 379.557881 
 127.174444 35.703222 387.505502 
 127.174556 35.703222 393.976103 
 127.174667 35.703222 396.183452 
 127.173444 35.703445 352.842705 
 127.173556 35.703445 354.409435 
 127.173667 35.703445 362.276099 
 127.173778 35.703445 371.800176 
 127.173889 35.703445 377.226803 
 127.174000 35.703445 379.086821 
 127.174111 35.703445 376.966579 
 127.174222 35.703445 378.978118 
 127.174333 35.703445 383.306519 
 127.174444 35.703445 389.044165 
 127.174556 35.703445 393.133681 
 127.174667 35.703445 396.189907 
 127.174778 35.703445 401.817538 
 127.173556 35.703778 361.641358 
 127.173667 35.703778 370.809314 
 127.173778 35.703778 376.975510 
 127.173889 35.703778 379.811034 
 127.174000 35.703778 379.352380 
 127.174111 35.703778 379.988912 
 127.174222 35.703778 384.937127 
 127.174333 35.703778 388.566531 
 127.174444 35.703778 391.189650 
 127.174556 35.703778 391.453938 
 127.174667 35.703778 393.560184 
 127.174778 35.703778 398.924224 
 127.174889 35.703778 398.911360 
 127.173667 35.704000 374.753435 
 127.173778 35.704000 379.737515 
 127.173889 35.704000 379.351886 
 127.174000 35.704000 379.560204 
 127.174111 35.704000 383.193587 
 127.174222 35.704000 386.774451 
 127.174333 35.704000 390.657097 
 127.174444 35.704000 391.193990 
 127.174556 35.704000 391.211999 
 127.174667 35.704000 392.036761 
 127.174778 35.704000 396.471628 
 127.174889 35.704000 396.073670 
 127.175000 35.704000 396.188296 
 127.173778 35.700556 405.896978 
 127.173889 35.700556 405.962194 
 127.174000 35.700556 409.091644 
 127.174111 35.700556 413.869405 
 127.174222 35.700556 414.736039 
 127.174333 35.700556 414.169079 
 127.174444 35.700556 414.141528 
 127.174556 35.700556 413.090797 
 127.174667 35.700556 412.314016 
 127.174778 35.700556 410.665171 
 127.174889 35.700556 399.780869 
 127.175000 35.700556 396.067778 
 127.175111 35.700556 396.070655 
 127.173778 35.700667 405.899001 
 127.173889 35.700667 407.623502 
 127.174000 35.700667 409.960584 
 127.174111 35.700667 417.543207 
 127.174222 35.700667 417.064679 
 127.174333 35.700667 414.246230 
 127.174444 35.700667 414.168815 
 127.174556 35.700667 413.354047 
 127.174667 35.700667 413.080043 
 127.174778 35.700667 409.285527 
 127.174889 35.700667 398.921360 
 127.175000 35.700667 396.096142 
 127.175111 35.700667 396.070133 
 127.173778 35.700778 405.905099 
 127.173889 35.700778 407.237014 
 127.174000 35.700778 413.785796 
 127.174111 35.700778 422.816542 
 127.174222 35.700778 420.325047 
 127.174333 35.700778 414.714764 
 127.174444 35.700778 414.713130 
 127.174556 35.700778 414.068730 
 127.174667 35.700778 413.453860 
 127.174778 35.700778 407.979199 
 127.174889 35.700778 398.911848 
 127.175000 35.700778 397.652785 
 127.175111 35.700778 396.065950 
 127.173889 35.700778 407.237014 
 127.174000 35.700778 413.785796 
 127.174111 35.700778 422.816542 
 127.174222 35.700778 420.325047 
 127.174333 35.700778 414.714764 
 127.174444 35.700778 414.713130 
 127.174556 35.700778 414.068730 
 127.174667 35.700778 413.453860 
 127.174778 35.700778 407.979199 
 127.174889 35.700778 398.911848 
 127.175000 35.700778 397.652785 
 127.175111 35.700778 396.065950 
 127.175222 35.700778 396.188973 
 127.173889 35.700889 410.755908 
 127.174000 35.700889 417.399984 
 127.174111 35.700889 429.045724 
 127.174222 35.700889 423.546451 
 127.174333 35.700889 417.587814 
 127.174444 35.700889 416.626777 
 127.174556 35.700889 416.889931 
 127.174667 35.700889 414.713375 
 127.174778 35.700889 413.078382 
 127.174889 35.700889 400.964268 
 127.175000 35.700889 399.027071 
 127.175111 35.700889 396.114021 
 127.175222 35.700889 394.733016 
 127.173889 35.701000 412.590865 
 127.174000 35.701000 422.842342 
 127.174111 35.701000 431.837839 
 127.174222 35.701000 429.048317 
 127.174333 35.701000 422.876581 
 127.174444 35.701000 425.741211 
 127.174556 35.701000 422.466843 
 127.174667 35.701000 420.322727 
 127.174778 35.701000 416.192641 
 127.174889 35.701000 402.972597 
 127.175000 35.701000 400.390980 
 127.175111 35.701000 397.975086 
 127.175222 35.701000 393.142998 
 127.173889 35.701111 415.826737 
 127.174000 35.701111 429.043053 
 127.174111 35.701111 434.753911 
 127.174222 35.701111 434.126968 
 127.174333 35.701111 431.837753 
 127.174444 35.701111 434.279050 
 127.174556 35.701111 429.047049 
 127.174667 35.701111 425.748749 
 127.174778 35.701111 421.254120 
 127.174889 35.701111 407.599201 
 127.175000 35.701111 401.972127 
 127.175111 35.701111 400.598985 
 127.175222 35.701111 392.037128 
 127.174000 35.701111 429.043053 
 127.174111 35.701111 434.753911 
 127.174222 35.701111 434.126968 
 127.174333 35.701111 431.837753 
 127.174444 35.701111 434.279050 
 127.174556 35.701111 429.047049 
 127.174667 35.701111 425.748749 
 127.174778 35.701111 421.254120 
 127.174889 35.701111 407.599201 
 127.175000 35.701111 401.972127 
 127.175111 35.701111 400.598985 
 127.175222 35.701111 392.037128 
 127.175333 35.701111 387.807480 
 127.174000 35.701222 431.837296 
 127.174111 35.701222 436.514630 
 127.174222 35.701222 437.018606 
 127.174333 35.701222 437.862162 
 127.174444 35.701222 439.774546 
 127.174556 35.701222 432.020574 
 127.174667 35.701222 430.182844 
 127.174778 35.701222 425.746041 
 127.174889 35.701222 409.870417 
 127.175000 35.701222 405.894835 
 127.175111 35.701222 400.948861 
 127.175222 35.701222 391.996461 
 127.175333 35.701222 387.400614 
 127.174000 35.701333 434.294411 
 127.174111 35.701333 436.958820 
 127.174222 35.701333 437.073646 
 127.174333 35.701333 440.064354 
 127.174444 35.701333 440.064726 
 127.174556 35.701333 434.514945 
 127.174667 35.701333 431.817147 
 127.174778 35.701333 427.753929 
 127.174889 35.701333 413.882628 
 127.175000 35.701333 407.327475 
 127.175111 35.701333 402.761079 
 127.175222 35.701333 391.979780 
 127.175333 35.701333 387.388398 
 127.174000 35.701445 436.389876 
 127.174111 35.701445 436.428522 
 127.174222 35.701445 436.986555 
 127.174333 35.701445 439.900651 
 127.174444 35.701445 440.062949 
 127.174556 35.701445 434.291080 
 127.174667 35.701445 431.620979 
 127.174778 35.701445 427.737363 
 127.174889 35.701445 414.575658 
 127.175000 35.701445 409.802448 
 127.175111 35.701445 404.335133 
 127.175222 35.701445 392.034910 
 127.175333 35.701445 387.387976 
 127.174111 35.701445 436.428522 
 127.174222 35.701445 436.986555 
 127.174333 35.701445 439.900651 
 127.174444 35.701445 440.062949 
 127.174556 35.701445 434.291080 
 127.174667 35.701445 431.620979 
 127.174778 35.701445 427.737363 
 127.174889 35.701445 414.575658 
 127.175000 35.701445 409.802448 
 127.175111 35.701445 404.335133 
 127.175222 35.701445 392.034910 
 127.175333 35.701445 387.387976 
 127.175444 35.701445 387.381654 
 127.174111 35.701556 436.353546 
 127.174222 35.701556 436.001003 
 127.174333 35.701556 437.072768 
 127.174444 35.701556 437.538731 
 127.174556 35.701556 431.837345 
 127.174667 35.701556 429.079911 
 127.174778 35.701556 425.741822 
 127.174889 35.701556 414.685796 
 127.175000 35.701556 411.203760 
 127.175111 35.701556 405.554595 
 127.175222 35.701556 392.036797 
 127.175333 35.701556 387.387597 
 127.175444 35.701556 387.120069 
 127.174111 35.701667 434.391818 
 127.174222 35.701667 431.845367 
 127.174333 35.701667 429.399973 
 127.174444 35.701667 429.062761 
 127.174556 35.701667 427.734805 
 127.174667 35.701667 425.740050 
 127.174778 35.701667 422.484450 
 127.174889 35.701667 414.168914 
 127.175000 35.701667 409.816661 
 127.175111 35.701667 403.996808 
 127.175222 35.701667 392.035765 
 127.175333 35.701667 387.382712 
 127.175444 35.701667 385.838594 
 127.174111 35.701778 432.317532 
 127.174222 35.701778 429.041785 
 127.174333 35.701778 419.384670 
 127.174444 35.701778 416.954789 
 127.174556 35.701778 420.187784 
 127.174667 35.701778 420.183413 
 127.174778 35.701778 419.299372 
 127.174889 35.701778 413.354003 
 127.175000 35.701778 409.263001 
 127.175111 35.701778 400.907022 
 127.175222 35.701778 391.196211 
 127.175333 35.701778 387.381660 
 127.175444 35.701778 384.691648 
 127.174222 35.701889 420.202385 
 127.174333 35.701889 409.807524 
 127.174444 35.701889 409.943197 
 127.174556 35.701889 416.203745 
 127.174667 35.701889 417.518210 
 127.174778 35.701889 416.285798 
 127.174889 35.701889 408.458404 
 127.175000 35.701889 407.622019 
 127.175111 35.701889 396.158692 
 127.175222 35.701889 389.485345 
 127.175333 35.701889 387.216716 
 127.175444 35.701889 382.794542 
 127.175556 35.701889 379.128320 
 127.174222 35.702000 413.083938 
 127.174333 35.702000 407.616219 
 127.174444 35.702000 407.623523 
 127.174556 35.702000 413.863210 
 127.174667 35.702000 416.243043 
 127.174778 35.702000 414.709719 
 127.174889 35.702000 408.701442 
 127.175000 35.702000 404.359042 
 127.175111 35.702000 393.974460 
 127.175222 35.702000 389.048813 
 127.175333 35.702000 386.815808 
 127.175444 35.702000 380.931479 
 127.175556 35.702000 379.092244 
 127.174222 35.702111 407.280848 
 127.174333 35.702111 405.643764 
 127.174444 35.702111 404.367221 
 127.174556 35.702111 407.975267 
 127.174667 35.702111 414.713002 
 127.174778 35.702111 413.869754 
 127.174889 35.702111 407.230175 
 127.175000 35.702111 404.269509 
 127.175111 35.702111 393.958594 
 127.175222 35.702111 389.318342 
 127.175333 35.702111 387.380698 
 127.175444 35.702111 380.977397 
 127.175556 35.702111 379.205231 
 127.174222 35.702222 405.643887 
 127.174333 35.702222 404.250112 
 127.174444 35.702222 401.966069 
 127.174556 35.702222 405.643761 
 127.174667 35.702222 413.159157 
 127.174778 35.702222 412.273784 
 127.174889 35.702222 407.619363 
 127.175000 35.702222 404.337020 
 127.175111 35.702222 396.189879 
 127.175222 35.702222 392.029038 
 127.175333 35.702222 389.787023 
 127.175444 35.702222 383.271872 
 127.175556 35.702222 379.814144 
 127.174333 35.702222 404.250112 
 127.174444 35.702222 401.966069 
 127.174556 35.702222 405.643761 
 127.174667 35.702222 413.159157 
 127.174778 35.702222 412.273784 
 127.174889 35.702222 407.619363 
 127.175000 35.702222 404.337020 
 127.175111 35.702222 396.189879 
 127.175222 35.702222 392.029038 
 127.175333 35.702222 389.787023 
 127.175444 35.702222 383.271872 
 127.175556 35.702222 379.814144 
 127.175667 35.702222 379.395457 
 127.174333 35.702333 401.969396 
 127.174444 35.702333 399.948286 
 127.174556 35.702333 398.915479 
 127.174667 35.702333 408.683405 
 127.174778 35.702333 409.385256 
 127.174889 35.702333 407.623441 
 127.175000 35.702333 405.644484 
 127.175111 35.702333 401.150754 
 127.175222 35.702333 396.158912 
 127.175333 35.702333 395.807883 
 127.175444 35.702333 385.834509 
 127.175556 35.702333 380.980475 
 127.175667 35.702333 385.007073 
 127.174333 35.702445 400.223221 
 127.174444 35.702445 396.184892 
 127.174556 35.702445 397.406046 
 127.174667 35.702445 405.643761 
 127.174778 35.702445 408.941020 
 127.174889 35.702445 407.584387 
 127.175000 35.702445 407.233624 
 127.175111 35.702445 405.900601 
 127.175222 35.702445 404.337229 
 127.175333 35.702445 404.334470 
 127.175444 35.702445 392.681354 
 127.175556 35.702445 385.832126 
 127.175667 35.702445 391.252676 
 127.174333 35.702556 394.111631 
 127.174444 35.702556 393.970930 
 127.174556 35.702556 396.122579 
 127.174667 35.702556 403.995181 
 127.174778 35.702556 407.623308 
 127.174889 35.702556 407.230109 
 127.175000 35.702556 408.697051 
 127.175111 35.702556 407.300487 
 127.175222 35.702556 412.265109 
 127.175333 35.702556 412.317304 
 127.175444 35.702556 401.837014 
 127.175556 35.702556 393.334828 
 127.175667 35.702556 399.054907 
 127.174444 35.702556 393.970930 
 127.174556 35.702556 396.122579 
 127.174667 35.702556 403.995181 
 127.174778 35.702556 407.623308 
 127.174889 35.702556 407.230109 
 127.175000 35.702556 408.697051 
 127.175111 35.702556 407.300487 
 127.175222 35.702556 412.265109 
 127.175333 35.702556 412.317304 
 127.175444 35.702556 401.837014 
 127.175556 35.702556 393.334828 
 127.175667 35.702556 399.054907 
 127.175778 35.702556 405.643761 
 127.174444 35.702667 393.126766 
 127.174556 35.702667 394.738683 
 127.174667 35.702667 402.472643 
 127.174778 35.702667 405.902335 
 127.174889 35.702667 409.108567 
 127.175000 35.702667 409.313740 
 127.175111 35.702667 407.981501 
 127.175222 35.702667 414.713368 
 127.175333 35.702667 415.136859 
 127.175444 35.702667 410.554661 
 127.175556 35.702667 401.963533 
 127.175667 35.702667 405.643763 
 127.175778 35.702667 407.230806 
 127.174444 35.702778 392.036618 
 127.174556 35.702778 394.734780 
 127.174667 35.702778 400.946164 
 127.174778 35.702778 405.643702 
 127.174889 35.702778 408.643327 
 127.175000 35.702778 408.010739 
 127.175111 35.702778 412.268243 
 127.175222 35.702778 416.951143 
 127.175333 35.702778 416.952150 
 127.175444 35.702778 413.081590 
 127.175556 35.702778 407.623443 
 127.175667 35.702778 407.441007 
 127.175778 35.702778 407.232821 
 127.174444 35.702889 391.188067 
 127.174556 35.702889 394.733693 
 127.174667 35.702889 400.197946 
 127.174778 35.702889 403.171628 
 127.174889 35.702889 407.252075 
 127.175000 35.702889 409.807661 
 127.175111 35.702889 413.073935 
 127.175222 35.702889 416.330641 
 127.175333 35.702889 416.201769 
 127.175444 35.702889 412.279582 
 127.175556 35.702889 409.093376 
 127.175667 35.702889 409.106856 
 127.175778 35.702889 405.647729 
 127.174556 35.702889 394.733693 
 127.174667 35.702889 400.197946 
 127.174778 35.702889 403.171628 
 127.174889 35.702889 407.252075 
 127.175000 35.702889 409.807661 
 127.175111 35.702889 413.073935 
 127.175222 35.702889 416.330641 
 127.175333 35.702889 416.201769 
 127.175444 35.702889 412.279582 
 127.175556 35.702889 409.093376 
 127.175667 35.702889 409.106856 
 127.175778 35.702889 405.647729 
 127.175889 35.702889 398.798778 
 127.174556 35.703000 394.690923 
 127.174667 35.703000 396.471356 
 127.174778 35.703000 400.948988 
 127.174889 35.703000 408.700957 
 127.175000 35.703000 409.807433 
 127.175111 35.703000 412.270235 
 127.175222 35.703000 414.168804 
 127.175333 35.703000 413.355378 
 127.175444 35.703000 408.735757 
 127.175556 35.703000 407.623531 
 127.175667 35.703000 407.255924 
 127.175778 35.703000 401.989380 
 127.175889 35.703000 394.720045 
 127.174556 35.703111 394.134678 
 127.174667 35.703111 396.189558 
 127.174778 35.703111 399.229158 
 127.174889 35.703111 407.231290 
 127.175000 35.703111 407.974947 
 127.175111 35.703111 409.807384 
 127.175222 35.703111 409.863701 
 127.175333 35.703111 408.743514 
 127.175444 35.703111 404.318706 
 127.175556 35.703111 404.303746 
 127.175667 35.703111 404.337471 
 127.175778 35.703111 397.898611 
 127.175889 35.703111 392.969823 
 127.174556 35.703222 393.976103 
 127.174667 35.703222 396.183452 
 127.174778 35.703222 398.954666 
 127.174889 35.703222 405.655693 
 127.175000 35.703222 407.403762 
 127.175111 35.703222 409.666716 
 127.175222 35.703222 410.765582 
 127.175333 35.703222 404.826056 
 127.175444 35.703222 401.829190 
 127.175556 35.703222 400.966623 
 127.175667 35.703222 400.138744 
 127.175778 35.703222 393.161996 
 127.175889 35.703222 391.985233 
 127.174667 35.703222 396.183452 
 127.174778 35.703222 398.954666 
 127.174889 35.703222 405.655693 
 127.175000 35.703222 407.403762 
 127.175111 35.703222 409.666716 
 127.175222 35.703222 410.765582 
 127.175333 35.703222 404.826056 
 127.175444 35.703222 401.829190 
 127.175556 35.703222 400.966623 
 127.175667 35.703222 400.138744 
 127.175778 35.703222 393.161996 
 127.175889 35.703222 391.985233 
 127.176000 35.703222 390.436213 
 127.174667 35.703333 396.189502 
 127.174778 35.703333 400.900363 
 127.174889 35.703333 404.336784 
 127.175000 35.703333 407.236614 
 127.175111 35.703333 409.352626 
 127.175222 35.703333 408.701854 
 127.175333 35.703333 402.874402 
 127.175444 35.703333 398.924659 
 127.175556 35.703333 396.843688 
 127.175667 35.703333 389.143639 
 127.175778 35.703333 387.997752 
 127.175889 35.703333 390.581551 
 127.176000 35.703333 386.774575 
 127.174667 35.703445 396.189907 
 127.174778 35.703445 401.817538 
 127.174889 35.703445 403.995391 
 127.175000 35.703445 405.643783 
 127.175111 35.703445 408.673170 
 127.175222 35.703445 407.237263 
 127.175333 35.703445 401.962607 
 127.175444 35.703445 400.245786 
 127.175556 35.703445 393.140779 
 127.175667 35.703445 381.210177 
 127.175778 35.703445 383.384949 
 127.175889 35.703445 386.783004 
 127.176000 35.703445 379.924402 
 127.174667 35.703556 396.183151 
 127.174778 35.703556 401.828508 
 127.174889 35.703556 402.761035 
 127.175000 35.703556 403.963134 
 127.175111 35.703556 407.622852 
 127.175222 35.703556 404.398653 
 127.175333 35.703556 399.096942 
 127.175444 35.703556 395.727107 
 127.175556 35.703556 386.788409 
 127.175667 35.703556 376.894659 
 127.175778 35.703556 378.428251 
 127.175889 35.703556 379.992121 
 127.176000 35.703556 370.808557 
 127.174778 35.703556 401.828508 
 127.174889 35.703556 402.761035 
 127.175000 35.703556 403.963134 
 127.175111 35.703556 407.622852 
 127.175222 35.703556 404.398653 
 127.175333 35.703556 399.096942 
 127.175444 35.703556 395.727107 
 127.175556 35.703556 386.788409 
 127.175667 35.703556 376.894659 
 127.175778 35.703556 378.428251 
 127.175889 35.703556 379.992121 
 127.176000 35.703556 370.808557 
 127.176111 35.703556 365.202327 
 127.174778 35.703667 401.006341 
 127.174889 35.703667 401.831090 
 127.175000 35.703667 400.953286 
 127.175111 35.703667 402.734478 
 127.175222 35.703667 396.157974 
 127.175333 35.703667 390.861249 
 127.175444 35.703667 386.773273 
 127.175556 35.703667 379.352651 
 127.175667 35.703667 372.712962 
 127.175778 35.703667 372.719621 
 127.175889 35.703667 369.345485 
 127.176000 35.703667 363.034158 
 127.176111 35.703667 362.906050 
 127.174778 35.703778 398.924224 
 127.174889 35.703778 398.911360 
 127.175000 35.703778 400.224538 
 127.175111 35.703778 396.158053 
 127.175222 35.703778 386.060773 
 127.175333 35.703778 380.981932 
 127.175444 35.703778 374.865627 
 127.175556 35.703778 371.777443 
 127.175667 35.703778 372.108347 
 127.175778 35.703778 370.561270 
 127.175889 35.703778 360.810609 
 127.176000 35.703778 359.306026 
 127.176111 35.703778 362.241483 
 127.174778 35.703889 398.985632 
 127.174889 35.703889 399.171590 
 127.175000 35.703889 396.065721 
 127.175111 35.703889 392.036462 
 127.175222 35.703889 380.027061 
 127.175333 35.703889 376.970537 
 127.175444 35.703889 369.168720 
 127.175556 35.703889 367.516729 
 127.175667 35.703889 370.883417 
 127.175778 35.703889 365.283016 
 127.175889 35.703889 355.477861 
 127.176000 35.703889 355.805767 
 127.176111 35.703889 359.694151 
 127.174889 35.703889 399.171590 
 127.175000 35.703889 396.065721 
 127.175111 35.703889 392.036462 
 127.175222 35.703889 380.027061 
 127.175333 35.703889 376.970537 
 127.175444 35.703889 369.168720 
 127.175556 35.703889 367.516729 
 127.175667 35.703889 370.883417 
 127.175778 35.703889 365.283016 
 127.175889 35.703889 355.477861 
 127.176000 35.703889 355.805767 
 127.176111 35.703889 359.694151 
 127.176222 35.703889 357.310398 
 127.174889 35.704000 396.073670 
 127.175000 35.704000 396.188296 
 127.175111 35.704000 389.043708 
 127.175222 35.704000 379.809979 
 127.175333 35.704000 374.744337 
 127.175444 35.704000 368.127517 
 127.175556 35.704000 364.670903 
 127.175667 35.704000 367.516610 
 127.175778 35.704000 363.029153 
 127.175889 35.704000 354.240118 
 127.176000 35.704000 354.250049 
 127.176111 35.704000 356.737578 
 127.176222 35.704000 352.184686 
 127.174889 35.704111 396.284935 
 127.175000 35.704111 394.029121 
 127.175111 35.704111 386.784162 
 127.175222 35.704111 379.542271 
 127.175333 35.704111 374.753381 
 127.175444 35.704111 366.658581 
 127.175556 35.704111 365.293140 
 127.175667 35.704111 364.541105 
 127.175778 35.704111 361.264659 
 127.175889 35.704111 355.361530 
 127.176000 35.704111 353.875482 
 127.176111 35.704111 352.190909 
 127.176222 35.704111 349.587660 
 127.174889 35.704222 396.187758 
 127.175000 35.704222 392.013988 
 127.175111 35.704222 385.420426 
 127.175222 35.704222 379.991140 
 127.175333 35.704222 376.957585 
 127.175444 35.704222 369.155124 
 127.175556 35.704222 363.436687 
 127.175667 35.704222 362.974366 
 127.175778 35.704222 359.689328 
 127.175889 35.704222 356.413778 
 127.176000 35.704222 354.409590 
 127.176111 35.704222 352.849263 
 127.176222 35.704222 347.593402 
 127.175000 35.704222 392.013988 
 127.175111 35.704222 385.420426 
 127.175222 35.704222 379.991140 
 127.175333 35.704222 376.957585 
 127.175444 35.704222 369.155124 
 127.175556 35.704222 363.436687 
 127.175667 35.704222 362.974366 
 127.175778 35.704222 359.689328 
 127.175889 35.704222 356.413778 
 127.176000 35.704222 354.409590 
 127.176111 35.704222 352.849263 
 127.176222 35.704222 347.593402 
 127.176333 35.704222 348.144964 
 127.175000 35.704333 387.382236 
 127.175111 35.704333 385.010765 
 127.175222 35.704333 381.368357 
 127.175333 35.704333 379.821058 
 127.175444 35.704333 372.263061 
 127.175556 35.704333 365.022260 
 127.175667 35.704333 362.002854 
 127.175778 35.704333 359.725637 
 127.175889 35.704333 356.723571 
 127.176000 35.704333 355.477601 
 127.176111 35.704333 350.717983 
 127.176222 35.704333 347.658928 
 127.176333 35.704333 347.594932 
 127.175000 35.704444 385.831372 
 127.175111 35.704444 384.779542 
 127.175222 35.704444 383.271418 
 127.175333 35.704444 379.359363 
 127.175444 35.704444 376.968519 
 127.175556 35.704444 365.239570 
 127.175667 35.704444 362.946297 
 127.175778 35.704444 361.054206 
 127.175889 35.704444 359.711677 
 127.176000 35.704444 356.709648 
 127.176111 35.704444 351.137884 
 127.176222 35.704444 347.634091 
 127.176333 35.704444 348.872372 
 127.175000 35.704555 384.957317 
 127.175111 35.704555 383.363831 
 127.175222 35.704555 383.271249 
 127.175333 35.704555 379.877990 
 127.175444 35.704555 379.089233 
 127.175556 35.704555 365.124115 
 127.175667 35.704555 365.182098 
 127.175778 35.704555 365.273382 
 127.175889 35.704555 361.023147 
 127.176000 35.704555 361.095458 
 127.176111 35.704555 353.919499 
 127.176222 35.704555 349.418542 
 127.176333 35.704555 349.428054 
 127.175111 35.704555 383.363831 
 127.175222 35.704555 383.271249 
 127.175333 35.704555 379.877990 
 127.175444 35.704555 379.089233 
 127.175556 35.704555 365.124115 
 127.175667 35.704555 365.182098 
 127.175778 35.704555 365.273382 
 127.175889 35.704555 361.023147 
 127.176000 35.704555 361.095458 
 127.176111 35.704555 353.919499 
 127.176222 35.704555 349.418542 
 127.176333 35.704555 349.428054 
 127.176444 35.704555 352.848166 
 127.175111 35.704667 383.271411 
 127.175222 35.704667 380.965778 
 127.175333 35.704667 379.367192 
 127.175444 35.704667 378.929870 
 127.175556 35.704667 371.802170 
 127.175667 35.704667 372.719698 
 127.175778 35.704667 370.809949 
 127.175889 35.704667 363.032816 
 127.176000 35.704667 365.222972 
 127.176111 35.704667 356.766534 
 127.176222 35.704667 352.468776 
 127.176333 35.704667 350.782219 
 127.176444 35.704667 351.152224 
 127.175111 35.704778 380.786854 
 127.175222 35.704778 379.560685 
 127.175333 35.704778 379.087294 
 127.175444 35.704778 372.693815 
 127.175556 35.704778 376.975988 
 127.175667 35.704778 376.976193 
 127.175778 35.704778 375.159912 
 127.175889 35.704778 365.235555 
 127.176000 35.704778 365.944505 
 127.176111 35.704778 361.494306 
 127.176222 35.704778 352.101039 
 127.176333 35.704778 352.623700 
 127.176444 35.704778 351.153893 
 127.175111 35.704889 379.633364 
 127.175222 35.704889 379.364390 
 127.175333 35.704889 376.895555 
 127.175444 35.704889 369.154801 
 127.175556 35.704889 376.894842 
 127.175667 35.704889 374.737664 
 127.175778 35.704889 372.717029 
 127.175889 35.704889 365.242355 
 127.176000 35.704889 365.971346 
 127.176111 35.704889 361.494310 
 127.176222 35.704889 351.786067 
 127.176333 35.704889 352.847025 
 127.176444 35.704889 352.852572 
 127.175222 35.704889 379.364390 
 127.175333 35.704889 376.895555 
 127.175444 35.704889 369.154801 
 127.175556 35.704889 376.894842 
 127.175667 35.704889 374.737664 
 127.175778 35.704889 372.717029 
 127.175889 35.704889 365.242355 
 127.176000 35.704889 365.971346 
 127.176111 35.704889 361.494310 
 127.176222 35.704889 351.786067 
 127.176333 35.704889 352.847025 
 127.176444 35.704889 352.852572 
 127.176556 35.704889 349.835400 
 127.175222 35.705000 378.763298 
 127.175333 35.705000 368.731419 
 127.175444 35.705000 365.981092 
 127.175556 35.705000 367.516768 
 127.175667 35.705000 365.123723 
 127.175778 35.705000 363.026235 
 127.175889 35.705000 362.488493 
 127.176000 35.705000 365.293422 
 127.176111 35.705000 357.253094 
 127.176222 35.705000 349.455768 
 127.176333 35.705000 349.741091 
 127.176444 35.705000 348.893264 
 127.176556 35.705000 347.172886 
 127.175222 35.705111 369.154783 
 127.175333 35.705111 357.254973 
 127.175444 35.705111 363.007717 
 127.175556 35.705111 350.238911 
 127.175667 35.705111 352.849476 
 127.175778 35.705111 349.435138 
 127.175889 35.705111 355.265156 
 127.176000 35.705111 356.708099 
 127.176111 35.705111 349.424283 
 127.176222 35.705111 345.947549 
 127.176333 35.705111 347.173018 
 127.176444 35.705111 346.365706 
 127.176556 35.705111 343.781279 
 127.175222 35.705222 355.475005 
 127.175333 35.705222 352.184634 
 127.175444 35.705222 355.477912 
 127.175556 35.705222 344.064444 
 127.175667 35.705222 342.701261 
 127.175778 35.705222 342.659455 
 127.175889 35.705222 347.175603 
 127.176000 35.705222 347.594192 
 127.176111 35.705222 342.443880 
 127.176222 35.705222 341.452675 
 127.176333 35.705222 344.739510 
 127.176444 35.705222 343.060678 
 127.176556 35.705222 335.983113 
 127.175333 35.705222 352.184634 
 127.175444 35.705222 355.477912 
 127.175556 35.705222 344.064444 
 127.175667 35.705222 342.701261 
 127.175778 35.705222 342.659455 
 127.175889 35.705222 347.175603 
 127.176000 35.705222 347.594192 
 127.176111 35.705222 342.443880 
 127.176222 35.705222 341.452675 
 127.176333 35.705222 344.739510 
 127.176444 35.705222 343.060678 
 127.176556 35.705222 335.983113 
 127.176667 35.705222 325.716351 
 127.175333 35.705333 351.095142 
 127.175444 35.705333 353.749145 
 127.175556 35.705333 344.789851 
 127.175667 35.705333 340.951249 
 127.175778 35.705333 342.659457 
 127.175889 35.705333 345.952197 
 127.176000 35.705333 341.473349 
 127.176111 35.705333 335.938724 
 127.176222 35.705333 336.012471 
 127.176333 35.705333 338.671537 
 127.176444 35.705333 337.037348 
 127.176556 35.705333 330.471287 
 127.176667 35.705333 321.745335 
 127.175333 35.705444 352.184432 
 127.175444 35.705444 361.640417 
 127.175556 35.705444 352.177519 
 127.175667 35.705444 344.431225 
 127.175778 35.705444 346.072674 
 127.175889 35.705444 348.906941 
 127.176000 35.705444 338.741320 
 127.176111 35.705444 334.331874 
 127.176222 35.705444 334.342471 
 127.176333 35.705444 334.331891 
 127.176444 35.705444 332.362894 
 127.176556 35.705444 327.382818 
 127.176667 35.705444 319.721239 
 127.175333 35.705555 357.379362 
 127.175444 35.705555 368.740771 
 127.175556 35.705555 363.146372 
 127.175667 35.705555 352.852842 
 127.175778 35.705555 352.301887 
 127.175889 35.705555 354.388543 
 127.176000 35.705555 342.444152 
 127.176111 35.705555 335.982354 
 127.176222 35.705555 334.465243 
 127.176333 35.705555 330.610247 
 127.176444 35.705555 328.923977 
 127.176556 35.705555 325.210069 
 127.176667 35.705555 317.872029 
 127.175444 35.705555 368.740771 
 127.175556 35.705555 363.146372 
 127.175667 35.705555 352.852842 
 127.175778 35.705555 352.301887 
 127.175889 35.705555 354.388543 
 127.176000 35.705555 342.444152 
 127.176111 35.705555 335.982354 
 127.176222 35.705555 334.465243 
 127.176333 35.705555 330.610247 
 127.176444 35.705555 328.923977 
 127.176556 35.705555 325.210069 
 127.176667 35.705555 317.872029 
 127.176778 35.705555 315.635295 
 127.175444 35.705667 370.855991 
 127.175556 35.705667 367.540207 
 127.175667 35.705667 357.995422 
 127.175778 35.705667 358.054150 
 127.175889 35.705667 358.062449 
 127.176000 35.705667 345.947472 
 127.176111 35.705667 339.318701 
 127.176222 35.705667 336.145628 
 127.176333 35.705667 329.984144 
 127.176444 35.705667 327.294857 
 127.176556 35.705667 323.810723 
 127.176667 35.705667 317.921979 
 127.176778 35.705667 315.600928 
 127.175444 35.705778 370.882904 
 127.175556 35.705778 368.742400 
 127.175667 35.705778 363.025184 
 127.175778 35.705778 361.528482 
 127.175889 35.705778 360.461062 
 127.176000 35.705778 348.879000 
 127.176111 35.705778 343.789244 
 127.176222 35.705778 340.556988 
 127.176333 35.705778 330.466683 
 127.176444 35.705778 327.277364 
 127.176556 35.705778 323.164202 
 127.176667 35.705778 318.078311 
 127.176778 35.705778 315.737201 
 127.175444 35.705889 369.167322 
 127.175556 35.705889 368.124432 
 127.175667 35.705889 365.286672 
 127.175778 35.705889 361.494025 
 127.175889 35.705889 359.712397 
 127.176000 35.705889 351.341762 
 127.176111 35.705889 346.462360 
 127.176222 35.705889 342.664436 
 127.176333 35.705889 332.456927 
 127.176444 35.705889 327.280793 
 127.176556 35.705889 323.205224 
 127.176667 35.705889 317.872193 
 127.176778 35.705889 316.839161 
 127.175556 35.705889 368.124432 
 127.175667 35.705889 365.286672 
 127.175778 35.705889 361.494025 
 127.175889 35.705889 359.712397 
 127.176000 35.705889 351.341762 
 127.176111 35.705889 346.462360 
 127.176222 35.705889 342.664436 
 127.176333 35.705889 332.456927 
 127.176444 35.705889 327.280793 
 127.176556 35.705889 323.205224 
 127.176667 35.705889 317.872193 
 127.176778 35.705889 316.839161 
 127.176889 35.705889 316.656037 
 127.175556 35.706000 365.242831 
 127.175667 35.706000 363.033566 
 127.175778 35.706000 357.237293 
 127.175889 35.706000 355.344339 
 127.176000 35.706000 351.187116 
 127.176111 35.706000 347.778774 
 127.176222 35.706000 342.593574 
 127.176333 35.706000 333.512296 
 127.176444 35.706000 328.348384 
 127.176556 35.706000 323.181250 
 127.176667 35.706000 320.269984 
 127.176778 35.706000 317.576486 
 127.176889 35.706000 317.405632 
 127.175556 35.706111 364.930195 
 127.175667 35.706111 362.074794 
 127.175778 35.706111 351.095480 
 127.175889 35.706111 350.747363 
 127.176000 35.706111 350.744697 
 127.176111 35.706111 347.593942 
 127.176222 35.706111 341.434607 
 127.176333 35.706111 333.496038 
 127.176444 35.706111 328.926446 
 127.176556 35.706111 323.813629 
 127.176667 35.706111 321.887216 
 127.176778 35.706111 317.746863 
 127.176889 35.706111 317.773475 
 127.175556 35.706222 363.118333 
 127.175667 35.706222 355.240611 
 127.175778 35.706222 345.958128 
 127.175889 35.706222 345.967664 
 127.176000 35.706222 349.422768 
 127.176111 35.706222 347.175999 
 127.176222 35.706222 340.071638 
 127.176333 35.706222 333.509683 
 127.176444 35.706222 329.723390 
 127.176556 35.706222 324.737206 
 127.176667 35.706222 322.260227 
 127.176778 35.706222 317.564265 
 127.176889 35.706222 318.084688 
 127.175667 35.706222 355.240611 
 127.175778 35.706222 345.958128 
 127.175889 35.706222 345.967664 
 127.176000 35.706222 349.422768 
 127.176111 35.706222 347.175999 
 127.176222 35.706222 340.071638 
 127.176333 35.706222 333.509683 
 127.176444 35.706222 329.723390 
 127.176556 35.706222 324.737206 
 127.176667 35.706222 322.260227 
 127.176778 35.706222 317.564265 
 127.176889 35.706222 318.084688 
 127.177000 35.706222 317.854019 
 127.175667 35.706333 349.444864 
 127.175778 35.706333 344.754648 
 127.175889 35.706333 345.952329 
 127.176000 35.706333 349.783888 
 127.176111 35.706333 345.958037 
 127.176222 35.706333 337.038522 
 127.176333 35.706333 333.478316 
 127.176444 35.706333 329.743005 
 127.176556 35.706333 325.210010 
 127.176667 35.706333 323.018365 
 127.176778 35.706333 318.881958 
 127.176889 35.706333 317.644557 
 127.177000 35.706333 321.829588 
 127.175667 35.706444 345.947673 
 127.175778 35.706444 344.935956 
 127.175889 35.706444 347.777565 
 127.176000 35.706444 351.121373 
 127.176111 35.706444 344.764917 
 127.176222 35.706444 338.197060 
 127.176333 35.706444 333.500781 
 127.176444 35.706444 330.467583 
 127.176556 35.706444 326.812192 
 127.176667 35.706444 324.255090 
 127.176778 35.706444 320.903684 
 127.176889 35.706444 321.328572 
 127.177000 35.706444 325.712532 
 127.175667 35.706555 344.940877 
 127.175778 35.706555 345.981263 
 127.175889 35.706555 351.095497 
 127.176000 35.706555 352.792192 
 127.176111 35.706555 343.770871 
 127.176222 35.706555 336.012977 
 127.176333 35.706555 333.983423 
 127.176444 35.706555 331.122458 
 127.176556 35.706555 328.923259 
 127.176667 35.706555 325.730004 
 127.176778 35.706555 321.009895 
 127.176889 35.706555 323.160528 
 127.177000 35.706555 328.923963 
 127.175778 35.706555 345.981263 
 127.175889 35.706555 351.095497 
 127.176000 35.706555 352.792192 
 127.176111 35.706555 343.770871 
 127.176222 35.706555 336.012977 
 127.176333 35.706555 333.983423 
 127.176444 35.706555 331.122458 
 127.176556 35.706555 328.923259 
 127.176667 35.706555 325.730004 
 127.176778 35.706555 321.009895 
 127.176889 35.706555 323.160528 
 127.177000 35.706555 328.923963 
 127.177111 35.706555 321.701831 
 127.175778 35.706667 350.745093 
 127.175889 35.706667 355.349142 
 127.176000 35.706667 354.203146 
 127.176111 35.706667 343.784672 
 127.176222 35.706667 336.269491 
 127.176333 35.706667 335.252890 
 127.176444 35.706667 333.511219 
 127.176556 35.706667 330.590929 
 127.176667 35.706667 328.351956 
 127.176778 35.706667 321.738658 
 127.176889 35.706667 325.566907 
 127.177000 35.706667 329.725023 
 127.177111 35.706667 320.890632 
 127.175778 35.706778 354.413114 
 127.175889 35.706778 357.321784 
 127.176000 35.706778 353.800843 
 127.176111 35.706778 344.752064 
 127.176222 35.706778 337.529820 
 127.176333 35.706778 335.936671 
 127.176444 35.706778 332.541650 
 127.176556 35.706778 333.333377 
 127.176667 35.706778 330.456246 
 127.176778 35.706778 322.315437 
 127.176889 35.706778 325.008040 
 127.177000 35.706778 327.352131 
 127.177111 35.706778 317.722787 
 127.175778 35.706889 357.473609 
 127.175889 35.706889 358.458324 
 127.176000 35.706889 355.477763 
 127.176111 35.706889 345.949330 
 127.176222 35.706889 340.280684 
 127.176333 35.706889 336.957565 
 127.176444 35.706889 334.351207 
 127.176556 35.706889 332.548443 
 127.176667 35.706889 330.594735 
 127.176778 35.706889 322.978230 
 127.176889 35.706889 322.298680 
 127.177000 35.706889 324.787325 
 127.177111 35.706889 318.025698 
 127.175889 35.706889 358.458324 
 127.176000 35.706889 355.477763 
 127.176111 35.706889 345.949330 
 127.176222 35.706889 340.280684 
 127.176333 35.706889 336.957565 
 127.176444 35.706889 334.351207 
 127.176556 35.706889 332.548443 
 127.176667 35.706889 330.594735 
 127.176778 35.706889 322.978230 
 127.176889 35.706889 322.298680 
 127.177000 35.706889 324.787325 
 127.177111 35.706889 318.025698 
 127.177222 35.706889 316.603767 
 127.175889 35.707000 358.162073 
 127.176000 35.707000 358.038005 
 127.176111 35.707000 348.333234 
 127.176222 35.707000 342.643574 
 127.176333 35.707000 340.349564 
 127.176444 35.707000 337.199933 
 127.176556 35.707000 334.331189 
 127.176667 35.707000 333.135354 
 127.176778 35.707000 323.881934 
 127.176889 35.707000 321.308691 
 127.177000 35.707000 321.887158 
 127.177111 35.707000 318.088201 
 127.177222 35.707000 321.035107 
 127.175889 35.707111 359.712054 
 127.176000 35.707111 358.453271 
 127.176111 35.707111 354.406820 
 127.176222 35.707111 348.538090 
 127.176333 35.707111 342.659457 
 127.176444 35.707111 338.678215 
 127.176556 35.707111 335.982437 
 127.176667 35.707111 335.988672 
 127.176778 35.707111 328.924211 
 127.176889 35.707111 322.285953 
 127.177000 35.707111 321.884423 
 127.177111 35.707111 322.855544 
 127.177222 35.707111 324.785845 
 127.175889 35.707222 360.456950 
 127.176000 35.707222 362.000358 
 127.176111 35.707222 358.070405 
 127.176222 35.707222 354.010207 
 127.176333 35.707222 345.855165 
 127.176444 35.707222 340.986339 
 127.176556 35.707222 341.036879 
 127.176667 35.707222 342.659461 
 127.176778 35.707222 335.993409 
 127.176889 35.707222 327.180042 
 127.177000 35.707222 327.277289 
 127.177111 35.707222 328.925784 
 127.177222 35.707222 327.319394 
 127.176000 35.707222 362.000358 
 127.176111 35.707222 358.070405 
 127.176222 35.707222 354.010207 
 127.176333 35.707222 345.855165 
 127.176444 35.707222 340.986339 
 127.176556 35.707222 341.036879 
 127.176667 35.707222 342.659461 
 127.176778 35.707222 335.993409 
 127.176889 35.707222 327.180042 
 127.177000 35.707222 327.277289 
 127.177111 35.707222 328.925784 
 127.177222 35.707222 327.319394 
 127.177333 35.707222 331.217591 
 127.176000 35.707333 362.475675 
 127.176111 35.707333 361.497992 
 127.176222 35.707333 357.233835 
 127.176333 35.707333 346.414493 
 127.176444 35.707333 342.798534 
 127.176556 35.707333 342.658824 
 127.176667 35.707333 346.518357 
 127.176778 35.707333 343.773438 
 127.176889 35.707333 335.253244 
 127.177000 35.707333 340.146893 
 127.177111 35.707333 337.174733 
 127.177222 35.707333 330.590075 
 127.177333 35.707333 337.037832 
 127.176000 35.707444 362.871251 
 127.176111 35.707444 362.017316 
 127.176222 35.707444 359.706806 
 127.176333 35.707444 348.890330 
 127.176444 35.707444 344.232945 
 127.176556 35.707444 345.032810 
 127.176667 35.707444 350.750259 
 127.176778 35.707444 348.776847 
 127.176889 35.707444 344.713143 
 127.177000 35.707444 352.177016 
 127.177111 35.707444 347.349884 
 127.177222 35.707444 338.099530 
 127.177333 35.707444 344.757885 
 127.176000 35.707556 363.031418 
 127.176111 35.707556 363.034796 
 127.176222 35.707556 362.489288 
 127.176333 35.707556 353.901036 
 127.176444 35.707556 346.407958 
 127.176556 35.707556 348.478321 
 127.176667 35.707556 353.886771 
 127.176778 35.707556 352.177037 
 127.176889 35.707556 351.139446 
 127.177000 35.707556 356.713704 
 127.177111 35.707556 353.799950 
 127.177222 35.707556 345.952638 
 127.177333 35.707556 348.924785 
 127.176111 35.707556 363.034796 
 127.176222 35.707556 362.489288 
 127.176333 35.707556 353.901036 
 127.176444 35.707556 346.407958 
 127.176556 35.707556 348.478321 
 127.176667 35.707556 353.886771 
 127.176778 35.707556 352.177037 
 127.176889 35.707556 351.139446 
 127.177000 35.707556 356.713704 
 127.177111 35.707556 353.799950 
 127.177222 35.707556 345.952638 
 127.177333 35.707556 348.924785 
 127.177444 35.707556 349.417528 
 127.176111 35.707667 365.293438 
 127.176222 35.707667 365.089475 
 127.176333 35.707667 361.642159 
 127.176444 35.707667 352.945909 
 127.176556 35.707667 354.162124 
 127.176667 35.707667 359.712342 
 127.176778 35.707667 355.889233 
 127.176889 35.707667 355.805871 
 127.177000 35.707667 360.452479 
 127.177111 35.707667 358.452298 
 127.177222 35.707667 352.832520 
 127.177333 35.707667 349.420259 
 127.177444 35.707667 348.877347 
 127.176111 35.707778 365.108201 
 127.176222 35.707778 370.801534 
 127.176333 35.707778 368.764011 
 127.176444 35.707778 362.273600 
 127.176556 35.707778 363.093247 
 127.176667 35.707778 365.265335 
 127.176778 35.707778 362.260596 
 127.176889 35.707778 361.560584 
 127.177000 35.707778 361.640223 
 127.177111 35.707778 359.712147 
 127.177222 35.707778 351.095142 
 127.177333 35.707778 349.422256 
 127.177444 35.707778 347.202458 
 127.176111 35.707889 368.743883 
 127.176222 35.707889 372.719425 
 127.176333 35.707889 372.718024 
 127.176444 35.707889 370.053849 
 127.176556 35.707889 370.876696 
 127.176667 35.707889 372.107992 
 127.176778 35.707889 367.537168 
 127.176889 35.707889 362.019882 
 127.177000 35.707889 362.489575 
 127.177111 35.707889 358.048678 
 127.177222 35.707889 352.811280 
 127.177333 35.707889 347.602495 
 127.177444 35.707889 346.009751 
 127.176222 35.707889 372.719425 
 127.176333 35.707889 372.718024 
 127.176444 35.707889 370.053849 
 127.176556 35.707889 370.876696 
 127.176667 35.707889 372.107992 
 127.176778 35.707889 367.537168 
 127.176889 35.707889 362.019882 
 127.177000 35.707889 362.489575 
 127.177111 35.707889 358.048678 
 127.177222 35.707889 352.811280 
 127.177333 35.707889 347.602495 
 127.177444 35.707889 346.009751 
 127.177556 35.707889 345.832659 
 127.176222 35.708000 375.167760 
 127.176333 35.708000 375.172277 
 127.176444 35.708000 371.785805 
 127.176556 35.708000 371.779094 
 127.176667 35.708000 372.474636 
 127.176778 35.708000 370.869895 
 127.176889 35.708000 363.030479 
 127.177000 35.708000 362.203567 
 127.177111 35.708000 355.350738 
 127.177222 35.708000 346.642303 
 127.177333 35.708000 347.898587 
 127.177444 35.708000 345.947447 
 127.177556 35.708000 344.939288 
 127.176222 35.708111 374.771421 
 127.176333 35.708111 375.172062 
 127.176444 35.708111 372.108376 
 127.176556 35.708111 370.809558 
 127.176667 35.708111 372.719823 
 127.176778 35.708111 369.167559 
 127.176889 35.708111 362.489373 
 127.177000 35.708111 360.453711 
 127.177111 35.708111 347.173103 
 127.177222 35.708111 343.843796 
 127.177333 35.708111 345.952597 
 127.177444 35.708111 344.746115 
 127.177556 35.708111 342.671847 
 127.176222 35.708222 374.745114 
 127.176333 35.708222 372.272633 
 127.176444 35.708222 368.752803 
 127.176556 35.708222 368.741374 
 127.176667 35.708222 370.808513 
 127.176778 35.708222 364.841353 
 127.176889 35.708222 358.459791 
 127.177000 35.708222 356.685950 
 127.177111 35.708222 342.969817 
 127.177222 35.708222 342.443495 
 127.177333 35.708222 345.856517 
 127.177444 35.708222 340.154379 
 127.177556 35.708222 337.544821 
 127.176333 35.708222 372.272633 
 127.176444 35.708222 368.752803 
 127.176556 35.708222 368.741374 
 127.176667 35.708222 370.808513 
 127.176778 35.708222 364.841353 
 127.176889 35.708222 358.459791 
 127.177000 35.708222 356.685950 
 127.177111 35.708222 342.969817 
 127.177222 35.708222 342.443495 
 127.177333 35.708222 345.856517 
 127.177444 35.708222 340.154379 
 127.177556 35.708222 337.544821 
 127.177667 35.708222 331.059188 
 127.176333 35.708333 370.811219 
 127.176444 35.708333 365.106730 
 127.176556 35.708333 364.560092 
 127.176667 35.708333 365.931961 
 127.176778 35.708333 358.062253 
 127.176889 35.708333 352.203395 
 127.177000 35.708333 351.099590 
 127.177111 35.708333 338.751704 
 127.177222 35.708333 338.671515 
 127.177333 35.708333 342.588473 
 127.177444 35.708333 333.144325 
 127.177556 35.708333 329.728920 
 127.177667 35.708333 321.893119 
 127.176333 35.708444 368.125117 
 127.176444 35.708444 363.038678 
 127.176556 35.708444 363.023046 
 127.176667 35.708444 362.007524 
 127.176778 35.708444 352.186909 
 127.176889 35.708444 348.852865 
 127.177000 35.708444 347.899329 
 127.177111 35.708444 337.036203 
 127.177222 35.708444 337.192209 
 127.177333 35.708444 337.679985 
 127.177444 35.708444 324.820832 
 127.177556 35.708444 322.853829 
 127.177667 35.708444 316.540288 
 127.176444 35.708444 363.038678 
 127.176556 35.708444 363.023046 
 127.176667 35.708444 362.007524 
 127.176778 35.708444 352.186909 
 127.176889 35.708444 348.852865 
 127.177000 35.708444 347.899329 
 127.177111 35.708444 337.036203 
 127.177222 35.708444 337.192209 
 127.177333 35.708444 337.679985 
 127.177444 35.708444 324.820832 
 127.177556 35.708444 322.853829 
 127.177667 35.708444 316.540288 
 127.177778 35.708444 314.182403 
 127.176444 35.708556 362.214483 
 127.176556 35.708556 362.489530 
 127.176667 35.708556 359.688194 
 127.176778 35.708556 350.745295 
 127.176889 35.708556 346.081309 
 127.177000 35.708556 345.947444 
 127.177111 35.708556 337.191694 
 127.177222 35.708556 332.540444 
 127.177333 35.708556 333.273094 
 127.177444 35.708556 322.863110 
 127.177556 35.708556 321.012788 
 127.177667 35.708556 316.255722 
 127.177778 35.708556 314.468199 
 127.176444 35.708667 362.488249 
 127.176556 35.708667 361.493970 
 127.176667 35.708667 358.461021 
 127.176778 35.708667 351.864327 
 127.176889 35.708667 346.360475 
 127.177000 35.708667 345.951766 
 127.177111 35.708667 337.190288 
 127.177222 35.708667 332.476856 
 127.177333 35.708667 330.467822 
 127.177444 35.708667 324.414156 
 127.177556 35.708667 321.310910 
 127.177667 35.708667 313.902427 
 127.177778 35.708667 313.536338 
 127.176444 35.708778 361.510700 
 127.176556 35.708778 361.624987 
 127.176667 35.708778 358.388275 
 127.176778 35.708778 352.177595 
 127.176889 35.708778 348.955920 
 127.177000 35.708778 347.608390 
 127.177111 35.708778 341.036889 
 127.177222 35.708778 333.510151 
 127.177333 35.708778 330.598980 
 127.177444 35.708778 325.732854 
 127.177556 35.708778 322.851455 
 127.177667 35.708778 315.057788 
 127.177778 35.708778 313.270105 
 127.176556 35.708778 361.624987 
 127.176667 35.708778 358.388275 
 127.176778 35.708778 352.177595 
 127.176889 35.708778 348.955920 
 127.177000 35.708778 347.608390 
 127.177111 35.708778 341.036889 
 127.177222 35.708778 333.510151 
 127.177333 35.708778 330.598980 
 127.177444 35.708778 325.732854 
 127.177556 35.708778 322.851455 
 127.177667 35.708778 315.057788 
 127.177778 35.708778 313.270105 
 127.177889 35.708778 313.818135 
 127.176556 35.708889 362.069536 
 127.176667 35.708889 358.097641 
 127.176778 35.708889 355.244860 
 127.176889 35.708889 351.098615 
 127.177000 35.708889 353.858688 
 127.177111 35.708889 347.334667 
 127.177222 35.708889 335.933037 
 127.177333 35.708889 336.032625 
 127.177444 35.708889 327.380924 
 127.177556 35.708889 324.901463 
 127.177667 35.708889 316.882634 
 127.177778 35.708889 313.824666 
 127.177889 35.708889 313.822592 
 127.176556 35.709000 360.422417 
 127.176667 35.709000 358.752923 
 127.176778 35.709000 357.322302 
 127.176889 35.709000 355.271630 
 127.177000 35.709000 357.263877 
 127.177111 35.709000 354.160922 
 127.177222 35.709000 344.937244 
 127.177333 35.709000 341.388291 
 127.177444 35.709000 328.183076 
 127.177556 35.709000 324.807739 
 127.177667 35.709000 318.086514 
 127.177778 35.709000 316.358549 
 127.177889 35.709000 313.268769 
 127.176556 35.709111 359.688195 
 127.176667 35.709111 359.709616 
 127.176778 35.709111 358.444118 
 127.176889 35.709111 358.108383 
 127.177000 35.709111 358.072015 
 127.177111 35.709111 357.251427 
 127.177222 35.709111 349.385278 
 127.177333 35.709111 345.958008 
 127.177444 35.709111 330.467738 
 127.177556 35.709111 327.277126 
 127.177667 35.709111 321.473657 
 127.177778 35.709111 316.645423 
 127.177889 35.709111 313.254608 
 127.176667 35.709111 359.709616 
 127.176778 35.709111 358.444118 
 127.176889 35.709111 358.108383 
 127.177000 35.709111 358.072015 
 127.177111 35.709111 357.251427 
 127.177222 35.709111 349.385278 
 127.177333 35.709111 345.958008 
 127.177444 35.709111 330.467738 
 127.177556 35.709111 327.277126 
 127.177667 35.709111 321.473657 
 127.177778 35.709111 316.645423 
 127.177889 35.709111 313.254608 
 127.178000 35.709111 308.854269 
 127.176667 35.709222 359.711219 
 127.176778 35.709222 358.395079 
 127.176889 35.709222 357.279192 
 127.177000 35.709222 358.047143 
 127.177111 35.709222 356.769852 
 127.177222 35.709222 351.113271 
 127.177333 35.709222 346.413901 
 127.177444 35.709222 335.625894 
 127.177556 35.709222 330.626653 
 127.177667 35.709222 325.252079 
 127.177778 35.709222 315.595358 
 127.177889 35.709222 312.837587 
 127.178000 35.709222 308.470538 
 127.176667 35.709333 359.448099 
 127.176778 35.709333 356.708538 
 127.176889 35.709333 355.805880 
 127.177000 35.709333 357.322331 
 127.177111 35.709333 356.692695 
 127.177222 35.709333 351.095182 
 127.177333 35.709333 345.832585 
 127.177444 35.709333 339.038108 
 127.177556 35.709333 334.332334 
 127.177667 35.709333 329.786757 
 127.177778 35.709333 317.768802 
 127.177889 35.709333 311.808723 
 127.178000 35.709333 308.202077 
 127.176667 35.709444 358.106076 
 127.176778 35.709444 358.096455 
 127.176889 35.709444 355.363280 
 127.177000 35.709444 355.363320 
 127.177111 35.709444 354.262228 
 127.177222 35.709444 351.095340 
 127.177333 35.709444 343.800653 
 127.177444 35.709444 340.776933 
 127.177556 35.709444 335.945073 
 127.177667 35.709444 332.469430 
 127.177778 35.709444 318.866861 
 127.177889 35.709444 312.462021 
 127.178000 35.709444 308.284041 
 127.176778 35.709444 358.096455 
 127.176889 35.709444 355.363280 
 127.177000 35.709444 355.363320 
 127.177111 35.709444 354.262228 
 127.177222 35.709444 351.095340 
 127.177333 35.709444 343.800653 
 127.177444 35.709444 340.776933 
 127.177556 35.709444 335.945073 
 127.177667 35.709444 332.469430 
 127.177778 35.709444 318.866861 
 127.177889 35.709444 312.462021 
 127.178000 35.709444 308.284041 
 127.178111 35.709444 306.004745 
 127.176778 35.709556 355.127908 
 127.176889 35.709556 354.101887 
 127.177000 35.709556 353.875974 
 127.177111 35.709556 352.950066 
 127.177222 35.709556 352.124482 
 127.177333 35.709556 344.362501 
 127.177444 35.709556 341.452655 
 127.177556 35.709556 335.601195 
 127.177667 35.709556 330.590226 
 127.177778 35.709556 320.903675 
 127.177889 35.709556 313.539247 
 127.178000 35.709556 308.602872 
 127.178111 35.709556 308.505425 
 127.176778 35.709667 354.307251 
 127.176889 35.709667 353.163603 
 127.177000 35.709667 352.950161 
 127.177111 35.709667 352.941672 
 127.177222 35.709667 352.177071 
 127.177333 35.709667 345.947437 
 127.177444 35.709667 341.231518 
 127.177556 35.709667 335.234793 
 127.177667 35.709667 329.571698 
 127.177778 35.709667 319.724668 
 127.177889 35.709667 315.057262 
 127.178000 35.709667 310.779639 
 127.178111 35.709667 311.110113 
 127.176778 35.709778 353.886622 
 127.176889 35.709778 352.949851 
 127.177000 35.709778 352.961410 
 127.177111 35.709778 352.959723 
 127.177222 35.709778 352.177148 
 127.177333 35.709778 346.375608 
 127.177444 35.709778 342.589138 
 127.177556 35.709778 334.530645 
 127.177667 35.709778 328.922555 
 127.177778 35.709778 321.328148 
 127.177889 35.709778 319.642505 
 127.178000 35.709778 316.625755 
 127.178111 35.709778 313.367632 
 127.176889 35.709778 352.949851 
 127.177000 35.709778 352.961410 
 127.177111 35.709778 352.959723 
 127.177222 35.709778 352.177148 
 127.177333 35.709778 346.375608 
 127.177444 35.709778 342.589138 
 127.177556 35.709778 334.530645 
 127.177667 35.709778 328.922555 
 127.177778 35.709778 321.328148 
 127.177889 35.709778 319.642505 
 127.178000 35.709778 316.625755 
 127.178111 35.709778 313.367632 
 127.178222 35.709778 316.950451 
 127.176889 35.709889 352.949671 
 127.177000 35.709889 353.885779 
 127.177111 35.709889 353.918794 
 127.177222 35.709889 352.177001 
 127.177333 35.709889 346.424091 
 127.177444 35.709889 344.097963 
 127.177556 35.709889 334.532348 
 127.177667 35.709889 329.750834 
 127.177778 35.709889 323.232596 
 127.177889 35.709889 324.751322 
 127.178000 35.709889 321.702244 
 127.178111 35.709889 318.011045 
 127.178222 35.709889 320.903634 
 127.176889 35.710000 352.991994 
 127.177000 35.710000 354.413701 
 127.177111 35.710000 354.403888 
 127.177222 35.710000 352.177087 
 127.177333 35.710000 346.417274 
 127.177444 35.710000 344.267011 
 127.177556 35.710000 334.332947 
 127.177667 35.710000 332.509391 
 127.177778 35.710000 328.358115 
 127.177889 35.710000 329.742232 
 127.178000 35.710000 326.666650 
 127.178111 35.710000 317.803546 
 127.178222 35.710000 323.812326 
 127.176889 35.710111 353.885939 
 127.177000 35.710111 354.341899 
 127.177111 35.710111 354.413871 
 127.177222 35.710111 352.177019 
 127.177333 35.710111 346.412374 
 127.177444 35.710111 344.497856 
 127.177556 35.710111 335.938129 
 127.177667 35.710111 335.937141 
 127.177778 35.710111 334.332500 
 127.177889 35.710111 332.789405 
 127.178000 35.710111 328.938412 
 127.178111 35.710111 321.010267 
 127.178222 35.710111 329.700041 
 127.177000 35.710111 354.341899 
 127.177111 35.710111 354.413871 
 127.177222 35.710111 352.177019 
 127.177333 35.710111 346.412374 
 127.177444 35.710111 344.497856 
 127.177556 35.710111 335.938129 
 127.177667 35.710111 335.937141 
 127.177778 35.710111 334.332500 
 127.177889 35.710111 332.789405 
 127.178000 35.710111 328.938412 
 127.178111 35.710111 321.010267 
 127.178222 35.710111 329.700041 
 127.178333 35.710111 336.014538 
 127.177000 35.710222 354.415231 
 127.177111 35.710222 352.949064 
 127.177222 35.710222 352.698954 
 127.177333 35.710222 345.951812 
 127.177444 35.710222 344.222017 
 127.177556 35.710222 340.119940 
 127.177667 35.710222 343.060687 
 127.177778 35.710222 340.544171 
 127.177889 35.710222 334.331235 
 127.178000 35.710222 330.590453 
 127.178111 35.710222 322.938864 
 127.178222 35.710222 334.530575 
 127.178333 35.710222 341.499037 
 127.177000 35.710333 352.689079 
 127.177111 35.710333 352.852727 
 127.177222 35.710333 346.224366 
 127.177333 35.710333 343.743127 
 127.177444 35.710333 342.654144 
 127.177556 35.710333 343.381290 
 127.177667 35.710333 345.949895 
 127.177778 35.710333 342.630356 
 127.177889 35.710333 335.857522 
 127.178000 35.710333 333.505428 
 127.178111 35.710333 324.814098 
 127.178222 35.710333 338.278061 
 127.178333 35.710333 345.956384 
 127.177000 35.710444 350.657518 
 127.177111 35.710444 345.947632 
 127.177222 35.710444 343.060298 
 127.177333 35.710444 341.936251 
 127.177444 35.710444 341.933088 
 127.177556 35.710444 342.660338 
 127.177667 35.710444 344.940640 
 127.177778 35.710444 342.658677 
 127.177889 35.710444 335.950467 
 127.178000 35.710444 333.132830 
 127.178111 35.710444 328.346040 
 127.178222 35.710444 341.075512 
 127.178333 35.710444 347.173698 
 127.177111 35.710444 345.947632 
 127.177222 35.710444 343.060298 
 127.177333 35.710444 341.936251 
 127.177444 35.710444 341.933088 
 127.177556 35.710444 342.660338 
 127.177667 35.710444 344.940640 
 127.177778 35.710444 342.658677 
 127.177889 35.710444 335.950467 
 127.178000 35.710444 333.132830 
 127.178111 35.710444 328.346040 
 127.178222 35.710444 341.075512 
 127.178333 35.710444 347.173698 
 127.178444 35.710444 343.018564 
 127.177111 35.710556 340.956257 
 127.177222 35.710556 338.764977 
 127.177333 35.710556 340.139783 
 127.177444 35.710556 341.032494 
 127.177556 35.710556 335.977199 
 127.177667 35.710556 339.282426 
 127.177778 35.710556 339.323709 
 127.177889 35.710556 334.331489 
 127.178000 35.710556 333.511825 
 127.178111 35.710556 328.340353 
 127.178222 35.710556 335.942828 
 127.178333 35.710556 344.970001 
 127.178444 35.710556 332.545990 
 127.177111 35.710667 337.519174 
 127.177222 35.710667 338.255843 
 127.177333 35.710667 340.412261 
 127.177444 35.710667 338.277919 
 127.177556 35.710667 328.345714 
 127.177667 35.710667 328.923703 
 127.177778 35.710667 330.591300 
 127.177889 35.710667 332.615868 
 127.178000 35.710667 332.414639 
 127.178111 35.710667 327.371337 
 127.178222 35.710667 332.369964 
 127.178333 35.710667 335.933614 
 127.178444 35.710667 324.380188 
 127.177111 35.710778 336.205098 
 127.177222 35.710778 335.940019 
 127.177333 35.710778 337.036232 
 127.177444 35.710778 334.430871 
 127.177556 35.710778 321.008881 
 127.177667 35.710778 318.851766 
 127.177778 35.710778 322.939255 
 127.177889 35.710778 329.742580 
 127.178000 35.710778 328.929763 
 127.178111 35.710778 324.924202 
 127.178222 35.710778 327.253732 
 127.178333 35.710778 324.792149 
 127.178444 35.710778 318.048413 
 127.177222 35.710778 335.940019 
 127.177333 35.710778 337.036232 
 127.177444 35.710778 334.430871 
 127.177556 35.710778 321.008881 
 127.177667 35.710778 318.851766 
 127.177778 35.710778 322.939255 
 127.177889 35.710778 329.742580 
 127.178000 35.710778 328.929763 
 127.178111 35.710778 324.924202 
 127.178222 35.710778 327.253732 
 127.178333 35.710778 324.792149 
 127.178444 35.710778 318.048413 
 127.178556 35.710778 314.340575 
 127.177222 35.710889 336.145675 
 127.177333 35.710889 332.540172 
 127.177444 35.710889 328.383854 
 127.177556 35.710889 315.061420 
 127.177667 35.710889 313.676248 
 127.177778 35.710889 313.861502 
 127.177889 35.710889 321.701851 
 127.178000 35.710889 321.726214 
 127.178111 35.710889 322.940612 
 127.178222 35.710889 321.701800 
 127.178333 35.710889 317.749885 
 127.178444 35.710889 314.507683 
 127.178556 35.710889 310.853861 
 127.177222 35.711000 332.595153 
 127.177333 35.711000 328.979467 
 127.177444 35.711000 325.064116 
 127.177556 35.711000 315.057267 
 127.177667 35.711000 310.746888 
 127.177778 35.711000 311.232941 
 127.177889 35.711000 308.921804 
 127.178000 35.711000 308.515215 
 127.178111 35.711000 313.551390 
 127.178222 35.711000 313.538919 
 127.178333 35.711000 313.957662 
 127.178444 35.711000 311.114029 
 127.178556 35.711000 305.333205 
 127.177333 35.711111 327.276210 
 127.177444 35.711111 325.031128 
 127.177556 35.711111 317.748818 
 127.177667 35.711111 310.766324 
 127.177778 35.711111 308.270602 
 127.177889 35.711111 300.765244 
 127.178000 35.711111 299.414987 
 127.178111 35.711111 302.423790 
 127.178222 35.711111 301.694063 
 127.178333 35.711111 308.187785 
 127.178444 35.711111 308.534549 
 127.178556 35.711111 298.444353 
 127.178667 35.711111 287.115034 
 127.177333 35.711222 327.378838 
 127.177444 35.711222 327.382692 
 127.177556 35.711222 322.907504 
 127.177667 35.711222 311.177021 
 127.177778 35.711222 308.291659 
 127.177889 35.711222 298.462042 
 127.178000 35.711222 296.488580 
 127.178111 35.711222 295.349550 
 127.178222 35.711222 295.149849 
 127.178333 35.711222 301.622757 
 127.178444 35.711222 303.036594 
 127.178556 35.711222 291.980227 
 127.178667 35.711222 284.444960 
 127.177333 35.711333 327.365439 
 127.177444 35.711333 328.345612 
 127.177556 35.711333 328.345631 
 127.177667 35.711333 316.989871 
 127.177778 35.711333 308.935104 
 127.177889 35.711333 301.621359 
 127.178000 35.711333 297.584882 
 127.178111 35.711333 293.613378 
 127.178222 35.711333 293.612650 
 127.178333 35.711333 298.443760 
 127.178444 35.711333 298.010526 
 127.178556 35.711333 287.001724 
 127.178667 35.711333 284.492427 
 127.177444 35.711333 328.345612 
 127.177556 35.711333 328.345631 
 127.177667 35.711333 316.989871 
 127.177778 35.711333 308.935104 
 127.177889 35.711333 301.621359 
 127.178000 35.711333 297.584882 
 127.178111 35.711333 293.613378 
 127.178222 35.711333 293.612650 
 127.178333 35.711333 298.443760 
 127.178444 35.711333 298.010526 
 127.178556 35.711333 287.001724 
 127.178667 35.711333 284.492427 
 127.178778 35.711333 284.532491 
 127.177444 35.711444 330.443758 
 127.177556 35.711444 332.586655 
 127.177667 35.711444 321.303377 
 127.177778 35.711444 313.693859 
 127.177889 35.711444 308.515230 
 127.178000 35.711444 300.610251 
 127.178111 35.711444 293.622937 
 127.178222 35.711444 293.864124 
 127.178333 35.711444 300.193426 
 127.178444 35.711444 297.642108 
 127.178556 35.711444 286.159292 
 127.178667 35.711444 284.573733 
 127.178778 35.711444 283.464098 
 127.177444 35.711556 333.512549 
 127.177556 35.711556 334.514294 
 127.177667 35.711556 327.364804 
 127.177778 35.711556 321.318103 
 127.177889 35.711556 319.731353 
 127.178000 35.711556 308.615003 
 127.178111 35.711556 295.350081 
 127.178222 35.711556 296.486760 
 127.178333 35.711556 302.603942 
 127.178444 35.711556 300.695863 
 127.178556 35.711556 287.849677 
 127.178667 35.711556 283.672601 
 127.178778 35.711556 285.006303 
 127.177444 35.711667 334.518718 
 127.177556 35.711667 334.613525 
 127.177667 35.711667 330.591498 
 127.177778 35.711667 328.345660 
 127.177889 35.711667 327.282262 
 127.178000 35.711667 317.749493 
 127.178111 35.711667 301.382041 
 127.178222 35.711667 300.231899 
 127.178333 35.711667 306.848589 
 127.178444 35.711667 304.432847 
 127.178556 35.711667 290.674321 
 127.178667 35.711667 284.445727 
 127.178778 35.711667 285.831629 
 127.177556 35.711667 334.613525 
 127.177667 35.711667 330.591498 
 127.177778 35.711667 328.345660 
 127.177889 35.711667 327.282262 
 127.178000 35.711667 317.749493 
 127.178111 35.711667 301.382041 
 127.178222 35.711667 300.231899 
 127.178333 35.711667 306.848589 
 127.178444 35.711667 304.432847 
 127.178556 35.711667 290.674321 
 127.178667 35.711667 284.445727 
 127.178778 35.711667 285.831629 
 127.178889 35.711667 286.252492 
 127.177556 35.711778 332.555022 
 127.177667 35.711778 330.587454 
 127.177778 35.711778 330.590802 
 127.177889 35.711778 330.467936 
 127.178000 35.711778 324.812244 
 127.178111 35.711778 311.109893 
 127.178222 35.711778 303.360059 
 127.178333 35.711778 309.694493 
 127.178444 35.711778 305.761942 
 127.178556 35.711778 297.617910 
 127.178667 35.711778 286.378808 
 127.178778 35.711778 286.224043 
 127.178889 35.711778 286.257066 
 127.177556 35.711889 329.762990 
 127.177667 35.711889 328.274207 
 127.177778 35.711889 329.745740 
 127.177889 35.711889 330.295021 
 127.178000 35.711889 325.731419 
 127.178111 35.711889 318.084031 
 127.178222 35.711889 310.907438 
 127.178333 35.711889 309.196921 
 127.178444 35.711889 308.833047 
 127.178556 35.711889 303.231854 
 127.178667 35.711889 289.645817 
 127.178778 35.711889 286.377989 
 127.178889 35.711889 286.197527 
 127.177556 35.712000 327.375633 
 127.177667 35.712000 324.878057 
 127.177778 35.712000 325.095347 
 127.177889 35.712000 325.603451 
 127.178000 35.712000 324.704920 
 127.178111 35.712000 321.021743 
 127.178222 35.712000 313.537987 
 127.178333 35.712000 310.746973 
 127.178444 35.712000 308.542239 
 127.178556 35.712000 304.338022 
 127.178667 35.712000 290.675070 
 127.178778 35.712000 286.269640 
 127.178889 35.712000 284.317369 
 127.177667 35.712000 324.878057 
 127.177778 35.712000 325.095347 
 127.177889 35.712000 325.603451 
 127.178000 35.712000 324.704920 
 127.178111 35.712000 321.021743 
 127.178222 35.712000 313.537987 
 127.178333 35.712000 310.746973 
 127.178444 35.712000 308.542239 
 127.178556 35.712000 304.338022 
 127.178667 35.712000 290.675070 
 127.178778 35.712000 286.269640 
 127.178889 35.712000 284.317369 
 127.179000 35.712000 276.865983 
 127.177667 35.712111 324.793710 
 127.177778 35.712111 318.045424 
 127.177889 35.712111 317.749882 
 127.178000 35.712111 322.851460 
 127.178111 35.712111 321.010204 
 127.178222 35.712111 314.501827 
 127.178333 35.712111 310.746950 
 127.178444 35.712111 308.277465 
 127.178556 35.712111 303.035873 
 127.178667 35.712111 290.676881 
 127.178778 35.712111 285.837453 
 127.178889 35.712111 280.192362 
 127.179000 35.712111 270.457230 
 127.177667 35.712222 322.869184 
 127.177778 35.712222 311.063630 
 127.177889 35.712222 311.807212 
 127.178000 35.712222 321.009682 
 127.178111 35.712222 318.131703 
 127.178222 35.712222 313.539074 
 127.178333 35.712222 311.233527 
 127.178444 35.712222 303.027595 
 127.178556 35.712222 298.096767 
 127.178667 35.712222 289.685425 
 127.178778 35.712222 283.771183 
 127.178889 35.712222 274.856356 
 127.179000 35.712222 265.234692 
 127.177667 35.712333 320.082207 
 127.177778 35.712333 307.202129 
 127.177889 35.712333 303.353452 
 127.178000 35.712333 313.263751 
 127.178111 35.712333 315.543183 
 127.178222 35.712333 312.475845 
 127.178333 35.712333 308.304701 
 127.178444 35.712333 297.991395 
 127.178556 35.712333 292.849136 
 127.178667 35.712333 285.859729 
 127.178778 35.712333 277.629041 
 127.178889 35.712333 269.021501 
 127.179000 35.712333 261.923316 
 127.177778 35.712333 307.202129 
 127.177889 35.712333 303.353452 
 127.178000 35.712333 313.263751 
 127.178111 35.712333 315.543183 
 127.178222 35.712333 312.475845 
 127.178333 35.712333 308.304701 
 127.178444 35.712333 297.991395 
 127.178556 35.712333 292.849136 
 127.178667 35.712333 285.859729 
 127.178778 35.712333 277.629041 
 127.178889 35.712333 269.021501 
 127.179000 35.712333 261.923316 
 127.179111 35.712333 259.794260 
 127.177778 35.712444 300.995740 
 127.177889 35.712444 297.565766 
 127.178000 35.712444 300.695915 
 127.178111 35.712444 308.309476 
 127.178222 35.712444 308.280196 
 127.178333 35.712444 302.461558 
 127.178444 35.712444 293.439341 
 127.178556 35.712444 289.460158 
 127.178667 35.712444 278.711658 
 127.178778 35.712444 270.322746 
 127.178889 35.712444 263.491954 
 127.179000 35.712444 260.268536 
 127.179111 35.712444 258.367983 
 127.177778 35.712556 293.850259 
 127.177889 35.712556 291.216854 
 127.178000 35.712556 289.181556 
 127.178111 35.712556 292.786261 
 127.178222 35.712556 297.635692 
 127.178333 35.712556 292.020460 
 127.178444 35.712556 288.384493 
 127.178556 35.712556 284.311870 
 127.178667 35.712556 271.803361 
 127.178778 35.712556 263.776731 
 127.178889 35.712556 260.504223 
 127.179000 35.712556 258.409179 
 127.179111 35.712556 258.687947 
 127.177778 35.712667 290.674823 
 127.177889 35.712667 289.689541 
 127.178000 35.712667 284.310213 
 127.178111 35.712667 282.929903 
 127.178222 35.712667 283.531456 
 127.178333 35.712667 279.775700 
 127.178444 35.712667 281.068842 
 127.178556 35.712667 277.628555 
 127.178667 35.712667 266.875720 
 127.178778 35.712667 260.005527 
 127.178889 35.712667 258.754378 
 127.179000 35.712667 258.687548 
 127.179111 35.712667 258.821390 
 127.177889 35.712667 289.689541 
 127.178000 35.712667 284.310213 
 127.178111 35.712667 282.929903 
 127.178222 35.712667 283.531456 
 127.178333 35.712667 279.775700 
 127.178444 35.712667 281.068842 
 127.178556 35.712667 277.628555 
 127.178667 35.712667 266.875720 
 127.178778 35.712667 260.005527 
 127.178889 35.712667 258.754378 
 127.179000 35.712667 258.687548 
 127.179111 35.712667 258.821390 
 127.179222 35.712667 256.111177 
 127.177889 35.712778 287.154149 
 127.178000 35.712778 280.714947 
 127.178111 35.712778 277.822477 
 127.178222 35.712778 275.118586 
 127.178333 35.712778 272.884556 
 127.178444 35.712778 275.126130 
 127.178556 35.712778 271.087289 
 127.178667 35.712778 261.919570 
 127.178778 35.712778 258.576489 
 127.178889 35.712778 257.683951 
 127.179000 35.712778 257.648069 
 127.179111 35.712778 256.293315 
 127.179222 35.712778 255.539632 
 127.177889 35.712889 285.758719 
 127.178000 35.712889 280.356008 
 127.178111 35.712889 276.866313 
 127.178222 35.712889 272.087650 
 127.178333 35.712889 270.455085 
 127.178444 35.712889 270.373879 
 127.178556 35.712889 265.212486 
 127.178667 35.712889 258.490682 
 127.178778 35.712889 256.976294 
 127.178889 35.712889 256.252677 
 127.179000 35.712889 256.251363 
 127.179111 35.712889 256.749146 
 127.179222 35.712889 255.361115 
 127.178000 35.712889 280.356008 
 127.178111 35.712889 276.866313 
 127.178222 35.712889 272.087650 
 127.178333 35.712889 270.455085 
 127.178444 35.712889 270.373879 
 127.178556 35.712889 265.212486 
 127.178667 35.712889 258.490682 
 127.178778 35.712889 256.976294 
 127.178889 35.712889 256.252677 
 127.179000 35.712889 256.251363 
 127.179111 35.712889 256.749146 
 127.179222 35.712889 255.361115 
 127.179333 35.712889 254.869810 
 127.178000 35.713000 278.523656 
 127.178111 35.713000 274.743859 
 127.178222 35.713000 268.990499 
 127.178333 35.713000 268.498217 
 127.178444 35.713000 266.995398 
 127.178556 35.713000 260.003330 
 127.178667 35.713000 257.614398 
 127.178778 35.713000 256.239294 
 127.178889 35.713000 256.120503 
 127.179000 35.713000 256.118327 
 127.179111 35.713000 255.650145 
 127.179222 35.713000 254.897058 
 127.179333 35.713000 254.785892 
 127.178000 35.713111 275.996503 
 127.178111 35.713111 270.327625 
 127.178222 35.713111 263.742303 
 127.178333 35.713111 265.019690 
 127.178444 35.713111 262.692889 
 127.178556 35.713111 256.251122 
 127.178667 35.713111 256.248561 
 127.178778 35.713111 255.398035 
 127.178889 35.713111 255.776700 
 127.179000 35.713111 256.891134 
 127.179111 35.713111 255.387011 
 127.179222 35.713111 254.868163 
 127.179333 35.713111 254.629342 
 127.178000 35.713222 271.289005 
 127.178111 35.713222 262.759728 
 127.178222 35.713222 258.754206 
 127.178333 35.713222 260.845302 
 127.178444 35.713222 258.685531 
 127.178556 35.713222 254.982021 
 127.178667 35.713222 254.988272 
 127.178778 35.713222 254.621773 
 127.178889 35.713222 254.869067 
 127.179000 35.713222 255.389748 
 127.179111 35.713222 254.873014 
 127.179222 35.713222 254.621732 
 127.179333 35.713222 254.985666 
 127.178111 35.713222 262.759728 
 127.178222 35.713222 258.754206 
 127.178333 35.713222 260.845302 
 127.178444 35.713222 258.685531 
 127.178556 35.713222 254.982021 
 127.178667 35.713222 254.988272 
 127.178778 35.713222 254.621773 
 127.178889 35.713222 254.869067 
 127.179000 35.713222 255.389748 
 127.179111 35.713222 254.873014 
 127.179222 35.713222 254.621732 
 127.179333 35.713222 254.985666 
 127.179444 35.713222 253.691817 
 127.178111 35.713333 256.110478 
 127.178222 35.713333 254.684600 
 127.178333 35.713333 256.949217 
 127.178444 35.713333 255.454878 
 127.178556 35.713333 254.149003 
 127.178667 35.713333 253.776693 
 127.178778 35.713333 254.983414 
 127.178889 35.713333 254.622820 
 127.179000 35.713333 254.629039 
 127.179111 35.713333 254.621730 
 127.179222 35.713333 254.984374 
 127.179333 35.713333 253.711308 
 127.179444 35.713333 253.690691 
 127.178111 35.713444 253.704740 
 127.178222 35.713444 253.654621 
 127.178333 35.713444 253.695055 
 127.178444 35.713444 253.690510 
 127.178556 35.713444 253.732739 
 127.178667 35.713444 254.149957 
 127.178778 35.713444 254.983281 
 127.178889 35.713444 254.987902 
 127.179000 35.713444 254.635106 
 127.179111 35.713444 253.785272 
 127.179222 35.713444 253.787387 
 127.179333 35.713444 253.690654 
 127.179444 35.713444 253.690509 
 127.178111 35.713556 252.440435 
 127.178222 35.713556 252.503504 
 127.178333 35.713556 253.616808 
 127.178444 35.713556 253.704796 
 127.178556 35.713556 253.704581 
 127.178667 35.713556 254.008711 
 127.178778 35.713556 253.868524 
 127.178889 35.713556 253.950028 
 127.179000 35.713556 253.802426 
 127.179111 35.713556 254.069975 
 127.179222 35.713556 253.696364 
 127.179333 35.713556 253.722354 
 127.179444 35.713556 253.817018 
 127.178222 35.713556 252.503504 
 127.178333 35.713556 253.616808 
 127.178444 35.713556 253.704796 
 127.178556 35.713556 253.704581 
 127.178667 35.713556 254.008711 
 127.178778 35.713556 253.868524 
 127.178889 35.713556 253.950028 
 127.179000 35.713556 253.802426 
 127.179111 35.713556 254.069975 
 127.179222 35.713556 253.696364 
 127.179333 35.713556 253.722354 
 127.179444 35.713556 253.817018 
 127.179556 35.713556 256.949138 
 127.178222 35.713667 252.429758 
 127.178333 35.713667 253.369557 
 127.178444 35.713667 253.616568 
 127.178556 35.713667 253.617037 
 127.178667 35.713667 253.668644 
 127.178778 35.713667 254.149710 
 127.178889 35.713667 254.145767 
 127.179000 35.713667 254.149718 
 127.179111 35.713667 254.149807 
 127.179222 35.713667 254.129648 
 127.179333 35.713667 254.086940 
 127.179444 35.713667 254.976198 
 127.179556 35.713667 258.775917 
 127.178222 35.713778 252.432972 
 127.178333 35.713778 253.308675 
 127.178444 35.713778 253.398164 
 127.178556 35.713778 253.399184 
 127.178667 35.713778 253.399310 
 127.178778 35.713778 253.616908 
 127.178889 35.713778 253.701540 
 127.179000 35.713778 254.149147 
 127.179111 35.713778 254.149965 
 127.179222 35.713778 254.149913 
 127.179333 35.713778 254.148964 
 127.179444 35.713778 254.621320 
 127.179556 35.713778 258.829024 
 127.178222 35.713889 252.437854 
 127.178333 35.713889 253.388942 
 127.178444 35.713889 253.395317 
 127.178556 35.713889 253.332881 
 127.178667 35.713889 252.879325 
 127.178778 35.713889 253.231743 
 127.178889 35.713889 253.485078 
 127.179000 35.713889 253.908640 
 127.179111 35.713889 254.145299 
 127.179222 35.713889 254.148849 
 127.179333 35.713889 254.149955 
 127.179444 35.713889 254.621354 
 127.179556 35.713889 258.825495 
 127.178333 35.713889 253.388942 
 127.178444 35.713889 253.395317 
 127.178556 35.713889 253.332881 
 127.178667 35.713889 252.879325 
 127.178778 35.713889 253.231743 
 127.178889 35.713889 253.485078 
 127.179000 35.713889 253.908640 
 127.179111 35.713889 254.145299 
 127.179222 35.713889 254.148849 
 127.179333 35.713889 254.149955 
 127.179444 35.713889 254.621354 
 127.179556 35.713889 258.825495 
 127.179667 35.713889 258.573873 
 127.178333 35.714000 253.394240 
 127.178444 35.714000 253.390265 
 127.178556 35.714000 252.451822 
 127.178667 35.714000 252.435836 
 127.178778 35.714000 252.435388 
 127.178889 35.714000 253.376581 
 127.179000 35.714000 253.705049 
 127.179111 35.714000 253.720438 
 127.179222 35.714000 253.858532 
 127.179333 35.714000 254.149983 
 127.179444 35.714000 254.629385 
 127.179556 35.714000 258.829545 
 127.179667 35.714000 258.573820 
 127.178333 35.714111 253.394597 
 127.178444 35.714111 252.980157 
 127.178556 35.714111 252.342280 
 127.178667 35.714111 252.336019 
 127.178778 35.714111 252.335969 
 127.178889 35.714111 252.433892 
 127.179000 35.714111 253.674924 
 127.179111 35.714111 253.704352 
 127.179222 35.714111 253.704978 
 127.179333 35.714111 254.149898 
 127.179444 35.714111 254.652218 
 127.179556 35.714111 258.789085 
 127.179667 35.714111 258.630978 
 127.178444 35.714111 252.980157 
 127.178556 35.714111 252.342280 
 127.178667 35.714111 252.336019 
 127.178778 35.714111 252.335969 
 127.178889 35.714111 252.433892 
 127.179000 35.714111 253.674924 
 127.179111 35.714111 253.704352 
 127.179222 35.714111 253.704978 
 127.179333 35.714111 254.149898 
 127.179444 35.714111 254.652218 
 127.179556 35.714111 258.789085 
 127.179667 35.714111 258.630978 
 127.179778 35.714111 260.155898 
 127.178444 35.714222 252.372254 
 127.178556 35.714222 251.579656 
 127.178667 35.714222 251.466746 
 127.178778 35.714222 251.463955 
 127.178889 35.714222 251.728627 
 127.179000 35.714222 253.453427 
 127.179111 35.714222 253.619678 
 127.179222 35.714222 253.704243 
 127.179333 35.714222 254.147466 
 127.179444 35.714222 254.625822 
 127.179556 35.714222 257.878054 
 127.179667 35.714222 258.687599 
 127.179778 35.714222 262.021673 
 127.178444 35.714333 251.482254 
 127.178556 35.714333 250.160027 
 127.178667 35.714333 250.159633 
 127.178778 35.714333 250.852779 
 127.178889 35.714333 250.493217 
 127.179000 35.714333 252.337806 
 127.179111 35.714333 253.597980 
 127.179222 35.714333 253.679844 
 127.179333 35.714333 254.139293 
 127.179444 35.714333 254.624739 
 127.179556 35.714333 257.694907 
 127.179667 35.714333 258.688157 
 127.179778 35.714333 261.602026 
 127.178444 35.714445 250.160352 
 127.178556 35.714445 249.896986 
 127.178667 35.714445 249.901335 
 127.178778 35.714445 250.159733 
 127.178889 35.714445 250.855191 
 127.179000 35.714445 251.701217 
 127.179111 35.714445 252.436892 
 127.179222 35.714445 253.616927 
 127.179333 35.714445 254.149980 
 127.179444 35.714445 254.905331 
 127.179556 35.714445 257.645130 
 127.179667 35.714445 258.587216 
 127.179778 35.714445 260.179232 
 127.178556 35.714445 249.896986 
 127.178667 35.714445 249.901335 
 127.178778 35.714445 250.159733 
 127.178889 35.714445 250.855191 
 127.179000 35.714445 251.701217 
 127.179111 35.714445 252.436892 
 127.179222 35.714445 253.616927 
 127.179333 35.714445 254.149980 
 127.179444 35.714445 254.905331 
 127.179556 35.714445 257.645130 
 127.179667 35.714445 258.587216 
 127.179778 35.714445 260.179232 
 127.179889 35.714445 260.504200 
 127.178556 35.714556 249.591445 
 127.178667 35.714556 249.885978 
 127.178778 35.714556 250.176465 
 127.178889 35.714556 250.600595 
 127.179000 35.714556 250.808005 
 127.179111 35.714556 252.322179 
 127.179222 35.714556 252.434931 
 127.179333 35.714556 253.615834 
 127.179444 35.714556 254.105549 
 127.179556 35.714556 256.944904 
 127.179667 35.714556 256.251204 
 127.179778 35.714556 258.575355 
 127.179889 35.714556 258.377641 
 127.178556 35.714667 249.454514 
 127.178667 35.714667 249.806428 
 127.178778 35.714667 250.208908 
 127.178889 35.714667 250.159632 
 127.179000 35.714667 250.477382 
 127.179111 35.714667 250.824110 
 127.179222 35.714667 252.123879 
 127.179333 35.714667 251.486674 
 127.179444 35.714667 252.336222 
 127.179556 35.714667 254.249436 
 127.179667 35.714667 253.617778 
 127.179778 35.714667 254.149966 
 127.179889 35.714667 254.678836 
 127.178556 35.714778 249.446789 
 127.178667 35.714778 249.774547 
 127.178778 35.714778 249.900713 
 127.178889 35.714778 250.208936 
 127.179000 35.714778 250.812466 
 127.179111 35.714778 250.612913 
 127.179222 35.714778 250.855187 
 127.179333 35.714778 250.852391 
 127.179444 35.714778 250.478978 
 127.179556 35.714778 250.840981 
 127.179667 35.714778 251.812543 
 127.179778 35.714778 251.463700 
 127.179889 35.714778 251.480398 
 127.178667 35.714778 249.774547 
 127.178778 35.714778 249.900713 
 127.178889 35.714778 250.208936 
 127.179000 35.714778 250.812466 
 127.179111 35.714778 250.612913 
 127.179222 35.714778 250.855187 
 127.179333 35.714778 250.852391 
 127.179444 35.714778 250.478978 
 127.179556 35.714778 250.840981 
 127.179667 35.714778 251.812543 
 127.179778 35.714778 251.463700 
 127.179889 35.714778 251.480398 
 127.180000 35.714778 251.701806 
 127.178667 35.714889 249.843959 
 127.178778 35.714889 249.896183 
 127.178889 35.714889 250.187795 
 127.179000 35.714889 250.854848 
 127.179111 35.714889 250.852222 
 127.179222 35.714889 250.162714 
 127.179333 35.714889 250.214864 
 127.179444 35.714889 250.160146 
 127.179556 35.714889 250.206679 
 127.179667 35.714889 250.169649 
 127.179778 35.714889 250.477648 
 127.179889 35.714889 250.480229 
 127.180000 35.714889 251.701848 
 127.178667 35.715000 249.881296 
 127.178778 35.715000 249.894507 
 127.178889 35.715000 249.901938 
 127.179000 35.715000 250.159628 
 127.179111 35.715000 250.159633 
 127.179222 35.715000 250.159984 
 127.179333 35.715000 250.160361 
 127.179444 35.715000 250.208720 
 127.179556 35.715000 249.896401 
 127.179667 35.715000 250.208982 
 127.179778 35.715000 250.854519 
 127.179889 35.715000 250.477812 
 127.180000 35.715000 251.701867 
 127.178778 35.715000 249.894507 
 127.178889 35.715000 249.901938 
 127.179000 35.715000 250.159628 
 127.179111 35.715000 250.159633 
 127.179222 35.715000 250.159984 
 127.179333 35.715000 250.160361 
 127.179444 35.715000 250.208720 
 127.179556 35.715000 249.896401 
 127.179667 35.715000 250.208982 
 127.179778 35.715000 250.854519 
 127.179889 35.715000 250.477812 
 127.180000 35.715000 251.701867 
 127.180111 35.715000 252.350587 
 127.178778 35.715111 249.894670 
 127.178889 35.715111 249.897275 
 127.179000 35.715111 250.208114 
 127.179111 35.715111 250.202719 
 127.179222 35.715111 250.208215 
 127.179333 35.715111 250.196245 
 127.179444 35.715111 249.969749 
 127.179556 35.715111 249.895817 
 127.179667 35.715111 250.152789 
 127.179778 35.715111 250.855155 
 127.179889 35.715111 250.529032 
 127.180000 35.715111 251.700511 
 127.180111 35.715111 251.911513 
 127.178778 35.715222 249.895953 
 127.178889 35.715222 249.897189 
 127.179000 35.715222 249.900695 
 127.179111 35.715222 249.890865 
 127.179222 35.715222 249.893147 
 127.179333 35.715222 249.896089 
 127.179444 35.715222 249.896375 
 127.179556 35.715222 249.908567 
 127.179667 35.715222 250.209083 
 127.179778 35.715222 250.854222 
 127.179889 35.715222 250.805983 
 127.180000 35.715222 251.465742 
 127.180111 35.715222 251.701614 
 127.178778 35.715333 249.896858 
 127.178889 35.715333 249.897420 
 127.179000 35.715333 249.899491 
 127.179111 35.715333 249.893925 
 127.179222 35.715333 249.883452 
 127.179333 35.715333 249.895578 
 127.179444 35.715333 249.896864 
 127.179556 35.715333 250.209098 
 127.179667 35.715333 250.173742 
 127.179778 35.715333 250.845643 
 127.179889 35.715333 250.809319 
 127.180000 35.715333 251.483744 
 127.180111 35.715333 251.470263 
 127.178889 35.715333 249.897420 
 127.179000 35.715333 249.899491 
 127.179111 35.715333 249.893925 
 127.179222 35.715333 249.883452 
 127.179333 35.715333 249.895578 
 127.179444 35.715333 249.896864 
 127.179556 35.715333 250.209098 
 127.179667 35.715333 250.173742 
 127.179778 35.715333 250.845643 
 127.179889 35.715333 250.809319 
 127.180000 35.715333 251.483744 
 127.180111 35.715333 251.470263 
 127.180222 35.715333 252.350467 
 127.178889 35.715445 249.897822 
 127.179000 35.715445 250.050424 
 127.179111 35.715445 250.208389 
 127.179222 35.715445 250.206708 
 127.179333 35.715445 250.197892 
 127.179444 35.715445 250.203044 
 127.179556 35.715445 250.163977 
 127.179667 35.715445 250.159655 
 127.179778 35.715445 250.837367 
 127.179889 35.715445 251.508088 
 127.180000 35.715445 251.463705 
 127.180111 35.715445 251.697750 
 127.180222 35.715445 252.336196 
 127.178889 35.715556 249.899177 
 127.179000 35.715556 250.209126 
 127.179111 35.715556 250.855212 
 127.179222 35.715556 250.853354 
 127.179333 35.715556 250.328542 
 127.179444 35.715556 250.169933 
 127.179556 35.715556 250.171798 
 127.179667 35.715556 250.165250 
 127.179778 35.715556 250.855213 
 127.179889 35.715556 252.125901 
 127.180000 35.715556 251.701903 
 127.180111 35.715556 252.340518 
 127.180222 35.715556 252.359797 
 127.178889 35.715667 249.915338 
 127.179000 35.715667 250.160017 
 127.179111 35.715667 250.807813 
 127.179222 35.715667 250.971610 
 127.179333 35.715667 250.497687 
 127.179444 35.715667 250.478345 
 127.179556 35.715667 250.479969 
 127.179667 35.715667 250.810434 
 127.179778 35.715667 250.779057 
 127.179889 35.715667 251.701630 
 127.180000 35.715667 252.351372 
 127.180111 35.715667 252.336640 
 127.180222 35.715667 252.435061 
 127.179000 35.715667 250.160017 
 127.179111 35.715667 250.807813 
 127.179222 35.715667 250.971610 
 127.179333 35.715667 250.497687 
 127.179444 35.715667 250.478345 
 127.179556 35.715667 250.479969 
 127.179667 35.715667 250.810434 
 127.179778 35.715667 250.779057 
 127.179889 35.715667 251.701630 
 127.180000 35.715667 252.351372 
 127.180111 35.715667 252.336640 
 127.180222 35.715667 252.435061 
 127.180333 35.715667 252.472374 
 127.179000 35.715778 250.682236 
 127.179111 35.715778 252.082396 
 127.179222 35.715778 251.469412 
 127.179333 35.715778 250.486465 
 127.179444 35.715778 251.074345 
 127.179556 35.715778 251.687099 
 127.179667 35.715778 251.463707 
 127.179778 35.715778 252.341799 
 127.179889 35.715778 252.335979 
 127.180000 35.715778 252.336053 
 127.180111 35.715778 252.343156 
 127.180222 35.715778 252.436994 
 127.180333 35.715778 252.507400 
 127.179000 35.715889 250.806642 
 127.179111 35.715889 251.701735 
 127.179222 35.715889 252.350943 
 127.179333 35.715889 252.040427 
 127.179444 35.715889 251.702116 
 127.179556 35.715889 252.347133 
 127.179667 35.715889 252.414716 
 127.179778 35.715889 253.343137 
 127.179889 35.715889 253.394729 
 127.180000 35.715889 252.436097 
 127.180111 35.715889 252.435214 
 127.180222 35.715889 252.529155 
 127.180333 35.715889 252.801034 
 127.179111 35.715889 251.701735 
 127.179222 35.715889 252.350943 
 127.179333 35.715889 252.040427 
 127.179444 35.715889 251.702116 
 127.179556 35.715889 252.347133 
 127.179667 35.715889 252.414716 
 127.179778 35.715889 253.343137 
 127.179889 35.715889 253.394729 
 127.180000 35.715889 252.436097 
 127.180111 35.715889 252.435214 
 127.180222 35.715889 252.529155 
 127.180333 35.715889 252.801034 
 127.180444 35.715889 253.363934 
 127.179111 35.716000 252.337436 
 127.179222 35.716000 253.617282 
 127.179333 35.716000 252.337089 
 127.179444 35.716000 252.339246 
 127.179556 35.716000 253.393167 
 127.179667 35.716000 253.488437 
 127.179778 35.716000 253.616983 
 127.179889 35.716000 253.616989 
 127.180000 35.716000 253.396513 
 127.180111 35.716000 253.385879 
 127.180222 35.716000 253.395273 
 127.180333 35.716000 253.394778 
 127.180444 35.716000 253.539238 
 127.179111 35.716111 253.665961 
 127.179222 35.716111 253.690796 
 127.179333 35.716111 254.987403 
 127.179444 35.716111 253.617130 
 127.179556 35.716111 253.614079 
 127.179667 35.716111 253.618351 
 127.179778 35.716111 253.704055 
 127.179889 35.716111 253.704265 
 127.180000 35.716111 253.616980 
 127.180111 35.716111 253.616651 
 127.180222 35.716111 253.616726 
 127.180333 35.716111 253.616706 
 127.180444 35.716111 253.703053 
 127.179111 35.716222 253.704586 
 127.179222 35.716222 254.867952 
 127.179333 35.716222 257.554246 
 127.179444 35.716222 254.707045 
 127.179556 35.716222 254.145622 
 127.179667 35.716222 253.784391 
 127.179778 35.716222 254.149957 
 127.179889 35.716222 254.149929 
 127.180000 35.716222 253.704798 
 127.180111 35.716222 253.703753 
 127.180222 35.716222 253.704563 
 127.180333 35.716222 253.704788 
 127.180444 35.716222 254.091294 
 127.179222 35.716222 254.867952 
 127.179333 35.716222 257.554246 
 127.179444 35.716222 254.707045 
 127.179556 35.716222 254.145622 
 127.179667 35.716222 253.784391 
 127.179778 35.716222 254.149957 
 127.179889 35.716222 254.149929 
 127.180000 35.716222 253.704798 
 127.180111 35.716222 253.703753 
 127.180222 35.716222 253.704563 
 127.180333 35.716222 253.704788 
 127.180444 35.716222 254.091294 
 127.180556 35.716222 254.656691 
 127.179222 35.716333 256.931038 
 127.179333 35.716333 258.754379 
 127.179444 35.716333 256.251444 
 127.179556 35.716333 255.388961 
 127.179667 35.716333 254.866130 
 127.179778 35.716333 254.621847 
 127.179889 35.716333 254.632537 
 127.180000 35.716333 253.692505 
 127.180111 35.716333 254.149766 
 127.180222 35.716333 254.142673 
 127.180333 35.716333 254.149972 
 127.180444 35.716333 254.146227 
 127.180556 35.716333 254.867211 
 127.179222 35.716444 258.690383 
 127.179333 35.716444 259.389949 
 127.179444 35.716444 257.651318 
 127.179556 35.716444 258.647092 
 127.179667 35.716444 258.575544 
 127.179778 35.716444 256.949072 
 127.179889 35.716444 256.256661 
 127.180000 35.716444 256.889775 
 127.180111 35.716444 254.868602 
 127.180222 35.716444 254.862452 
 127.180333 35.716444 253.731699 
 127.180444 35.716444 253.697846 
 127.180556 35.716444 255.388517 
 127.179222 35.716556 259.440654 
 127.179333 35.716556 260.003345 
 127.179444 35.716556 258.584394 
 127.179556 35.716556 258.367825 
 127.179667 35.716556 259.920492 
 127.179778 35.716556 258.573956 
 127.179889 35.716556 258.573881 
 127.180000 35.716556 258.691500 
 127.180111 35.716556 258.492405 
 127.180222 35.716556 256.949753 
 127.180333 35.716556 254.870247 
 127.180444 35.716556 254.622936 
 127.180556 35.716556 256.891127 
 127.179333 35.716556 260.003345 
 127.179444 35.716556 258.584394 
 127.179556 35.716556 258.367825 
 127.179667 35.716556 259.920492 
 127.179778 35.716556 258.573956 
 127.179889 35.716556 258.573881 
 127.180000 35.716556 258.691500 
 127.180111 35.716556 258.492405 
 127.180222 35.716556 256.949753 
 127.180333 35.716556 254.870247 
 127.180444 35.716556 254.622936 
 127.180556 35.716556 256.891127 
 127.180667 35.716556 256.110704 
 127.179333 35.716667 262.027026 
 127.179444 35.716667 260.922036 
 127.179556 35.716667 261.916855 
 127.179667 35.716667 260.566044 
 127.179778 35.716667 258.751388 
 127.179889 35.716667 259.383239 
 127.180000 35.716667 260.513756 
 127.180111 35.716667 258.575648 
 127.180222 35.716667 258.582428 
 127.180333 35.716667 256.949136 
 127.180444 35.716667 256.251064 
 127.180556 35.716667 256.250304 
 127.180667 35.716667 256.251086 
 127.179333 35.716778 263.077611 
 127.179444 35.716778 268.513298 
 127.179556 35.716778 266.361962 
 127.179667 35.716778 262.758539 
 127.179778 35.716778 260.203380 
 127.179889 35.716778 260.505415 
 127.180000 35.716778 262.374880 
 127.180111 35.716778 259.800852 
 127.180222 35.716778 258.754403 
 127.180333 35.716778 258.687568 
 127.180444 35.716778 258.687553 
 127.180556 35.716778 257.682767 
 127.180667 35.716778 257.593837 
 127.179444 35.716778 268.513298 
 127.179556 35.716778 266.361962 
 127.179667 35.716778 262.758539 
 127.179778 35.716778 260.203380 
 127.179889 35.716778 260.505415 
 127.180000 35.716778 262.374880 
 127.180111 35.716778 259.800852 
 127.180222 35.716778 258.754403 
 127.180333 35.716778 258.687568 
 127.180444 35.716778 258.687553 
 127.180556 35.716778 257.682767 
 127.180667 35.716778 257.593837 
 127.180778 35.716778 258.687515 
 127.179444 35.716889 272.837323 
 127.179556 35.716889 270.434896 
 127.179667 35.716889 267.038166 
 127.179778 35.716889 264.296251 
 127.179889 35.716889 262.759923 
 127.180000 35.716889 263.144282 
 127.180111 35.716889 262.027231 
 127.180222 35.716889 258.376926 
 127.180333 35.716889 259.397876 
 127.180444 35.716889 260.005302 
 127.180556 35.716889 258.754396 
 127.180667 35.716889 258.573843 
 127.180778 35.716889 258.754389 
 127.179444 35.717000 274.243985 
 127.179556 35.717000 272.837240 
 127.179667 35.717000 271.087306 
 127.179778 35.717000 267.906627 
 127.179889 35.717000 263.492570 
 127.180000 35.717000 263.494963 
 127.180111 35.717000 261.882749 
 127.180222 35.717000 259.414258 
 127.180333 35.717000 260.153176 
 127.180444 35.717000 262.026847 
 127.180556 35.717000 260.004372 
 127.180667 35.717000 258.754384 
 127.180778 35.717000 258.754024 
 127.179444 35.717111 274.329193 
 127.179556 35.717111 274.834425 
 127.179667 35.717111 273.514167 
 127.179778 35.717111 271.089908 
 127.179889 35.717111 265.021493 
 127.180000 35.717111 263.998283 
 127.180111 35.717111 263.166428 
 127.180222 35.717111 260.515531 
 127.180333 35.717111 260.504218 
 127.180444 35.717111 260.506618 
 127.180556 35.717111 262.024255 
 127.180667 35.717111 258.369376 
 127.180778 35.717111 258.735853 
 127.179556 35.717111 274.834425 
 127.179667 35.717111 273.514167 
 127.179778 35.717111 271.089908 
 127.179889 35.717111 265.021493 
 127.180000 35.717111 263.998283 
 127.180111 35.717111 263.166428 
 127.180222 35.717111 260.515531 
 127.180333 35.717111 260.504218 
 127.180444 35.717111 260.506618 
 127.180556 35.717111 262.024255 
 127.180667 35.717111 258.369376 
 127.180778 35.717111 258.735853 
 127.180889 35.717111 258.741637 
 127.179556 35.717222 274.510355 
 127.179667 35.717222 274.829331 
 127.179778 35.717222 272.930131 
 127.179889 35.717222 267.168220 
 127.180000 35.717222 265.094402 
 127.180111 35.717222 263.991204 
 127.180222 35.717222 263.142399 
 127.180333 35.717222 262.339222 
 127.180444 35.717222 260.919417 
 127.180556 35.717222 260.504267 
 127.180667 35.717222 259.303012 
 127.180778 35.717222 258.368145 
 127.180889 35.717222 258.368212 
 127.179556 35.717333 274.817648 
 127.179667 35.717333 274.823020 
 127.179778 35.717333 274.829474 
 127.179889 35.717333 268.647723 
 127.180000 35.717333 265.158998 
 127.180111 35.717333 265.033590 
 127.180222 35.717333 263.989433 
 127.180333 35.717333 263.952921 
 127.180444 35.717333 261.922529 
 127.180556 35.717333 260.949085 
 127.180667 35.717333 259.982372 
 127.180778 35.717333 259.378132 
 127.180889 35.717333 259.377782 
 127.179556 35.717444 274.834274 
 127.179667 35.717444 274.442718 
 127.179778 35.717444 274.745002 
 127.179889 35.717444 269.812299 
 127.180000 35.717444 266.539399 
 127.180111 35.717444 266.309745 
 127.180222 35.717444 265.233413 
 127.180333 35.717444 263.494159 
 127.180444 35.717444 262.760185 
 127.180556 35.717444 261.922734 
 127.180667 35.717444 260.152885 
 127.180778 35.717444 260.005416 
 127.180889 35.717444 259.445954 
 127.179667 35.717444 274.442718 
 127.179778 35.717444 274.745002 
 127.179889 35.717444 269.812299 
 127.180000 35.717444 266.539399 
 127.180111 35.717444 266.309745 
 127.180222 35.717444 265.233413 
 127.180333 35.717444 263.494159 
 127.180444 35.717444 262.760185 
 127.180556 35.717444 261.922734 
 127.180667 35.717444 260.152885 
 127.180778 35.717444 260.005416 
 127.180889 35.717444 259.445954 
 127.181000 35.717444 259.421427 
 127.179667 35.717555 275.118403 
 127.179778 35.717555 275.924711 
 127.179889 35.717555 271.126151 
 127.180000 35.717555 268.606553 
 127.180111 35.717555 267.371443 
 127.180222 35.717555 265.129590 
 127.180333 35.717555 263.990570 
 127.180444 35.717555 262.183926 
 127.180556 35.717555 262.374365 
 127.180667 35.717555 260.504215 
 127.180778 35.717555 261.817240 
 127.180889 35.717555 260.004187 
 127.181000 35.717555 259.735015 
 127.179667 35.717667 275.938033 
 127.179778 35.717667 276.503946 
 127.179889 35.717667 274.714320 
 127.180000 35.717667 269.504863 
 127.180111 35.717667 268.474043 
 127.180222 35.717667 265.923468 
 127.180333 35.717667 265.233626 
 127.180444 35.717667 263.144775 
 127.180556 35.717667 262.759762 
 127.180667 35.717667 261.956078 
 127.180778 35.717667 261.878634 
 127.180889 35.717667 260.153065 
 127.181000 35.717667 260.012727 
 127.179778 35.717667 276.503946 
 127.179889 35.717667 274.714320 
 127.180000 35.717667 269.504863 
 127.180111 35.717667 268.474043 
 127.180222 35.717667 265.923468 
 127.180333 35.717667 265.233626 
 127.180444 35.717667 263.144775 
 127.180556 35.717667 262.759762 
 127.180667 35.717667 261.956078 
 127.180778 35.717667 261.878634 
 127.180889 35.717667 260.153065 
 127.181000 35.717667 260.012727 
 127.181111 35.717667 260.504231 
 127.179778 35.717778 276.450910 
 127.179889 35.717778 274.744899 
 127.180000 35.717778 271.087786 
 127.180111 35.717778 269.511274 
 127.180222 35.717778 267.380270 
 127.180333 35.717778 266.332427 
 127.180444 35.717778 263.634505 
 127.180556 35.717778 264.308313 
 127.180667 35.717778 262.185362 
 127.180778 35.717778 262.613633 
 127.180889 35.717778 260.511072 
 127.181000 35.717778 260.504205 
 127.181111 35.717778 260.920109 
 127.179778 35.717889 276.001030 
 127.179889 35.717889 275.118481 
 127.180000 35.717889 271.887957 
 127.180111 35.717889 270.308224 
 127.180222 35.717889 267.559071 
 127.180333 35.717889 267.378144 
 127.180444 35.717889 266.390942 
 127.180556 35.717889 265.168262 
 127.180667 35.717889 264.250712 
 127.180778 35.717889 262.184642 
 127.180889 35.717889 262.492830 
 127.181000 35.717889 262.367644 
 127.181111 35.717889 261.037967 
 127.179778 35.718000 275.995522 
 127.179889 35.718000 275.120567 
 127.180000 35.718000 272.042388 
 127.180111 35.718000 271.075980 
 127.180222 35.718000 268.991164 
 127.180333 35.718000 268.689083 
 127.180444 35.718000 266.875805 
 127.180556 35.718000 266.416684 
 127.180667 35.718000 264.060036 
 127.180778 35.718000 263.185930 
 127.180889 35.718000 263.142910 
 127.181000 35.718000 262.191931 
 127.181111 35.718000 261.822820 
 127.179889 35.718000 275.120567 
 127.180000 35.718000 272.042388 
 127.180111 35.718000 271.075980 
 127.180222 35.718000 268.991164 
 127.180333 35.718000 268.689083 
 127.180444 35.718000 266.875805 
 127.180556 35.718000 266.416684 
 127.180667 35.718000 264.060036 
 127.180778 35.718000 263.185930 
 127.180889 35.718000 263.142910 
 127.181000 35.718000 262.191931 
 127.181111 35.718000 261.822820 
 127.181222 35.718000 261.893437 
 127.179889 35.718111 275.118521 
 127.180000 35.718111 273.089120 
 127.180111 35.718111 272.641866 
 127.180222 35.718111 269.502870 
 127.180333 35.718111 267.593826 
 127.180444 35.718111 268.731400 
 127.180556 35.718111 266.995139 
 127.180667 35.718111 265.168967 
 127.180778 35.718111 263.492031 
 127.180889 35.718111 264.268488 
 127.181000 35.718111 262.262518 
 127.181111 35.718111 261.916393 
 127.181222 35.718111 262.374530 
 127.179889 35.718222 275.105904 
 127.180000 35.718222 273.537788 
 127.180111 35.718222 273.540668 
 127.180222 35.718222 270.859253 
 127.180333 35.718222 268.656279 
 127.180444 35.718222 267.944905 
 127.180556 35.718222 267.027652 
 127.180667 35.718222 265.149896 
 127.180778 35.718222 263.944972 
 127.180889 35.718222 264.302291 
 127.181000 35.718222 263.142659 
 127.181111 35.718222 262.374478 
 127.181222 35.718222 263.141581 
 127.180000 35.718222 273.537788 
 127.180111 35.718222 273.540668 
 127.180222 35.718222 270.859253 
 127.180333 35.718222 268.656279 
 127.180444 35.718222 267.944905 
 127.180556 35.718222 267.027652 
 127.180667 35.718222 265.149896 
 127.180778 35.718222 263.944972 
 127.180889 35.718222 264.302291 
 127.181000 35.718222 263.142659 
 127.181111 35.718222 262.374478 
 127.181222 35.718222 263.141581 
 127.181333 35.718222 263.492066 
 127.180000 35.718333 274.324974 
 127.180111 35.718333 274.742357 
 127.180222 35.718333 273.089027 
 127.180333 35.718333 269.810199 
 127.180444 35.718333 268.496938 
 127.180556 35.718333 267.263345 
 127.180667 35.718333 265.024350 
 127.180778 35.718333 264.044903 
 127.180889 35.718333 263.841923 
 127.181000 35.718333 264.307554 
 127.181111 35.718333 263.142569 
 127.181222 35.718333 263.535861 
 127.181333 35.718333 263.857600 
 127.180000 35.718444 275.118463 
 127.180111 35.718444 275.119393 
 127.180222 35.718444 274.242881 
 127.180333 35.718444 272.780909 
 127.180444 35.718444 269.811987 
 127.180556 35.718444 268.730339 
 127.180667 35.718444 266.382917 
 127.180778 35.718444 265.020024 
 127.180889 35.718444 265.150158 
 127.181000 35.718444 263.990186 
 127.181111 35.718444 263.493101 
 127.181222 35.718444 263.652389 
 127.181333 35.718444 263.982339 
 127.180000 35.718555 275.810547 
 127.180111 35.718555 275.932250 
 127.180222 35.718555 275.935190 
 127.180333 35.718555 274.744060 
 127.180444 35.718555 270.312829 
 127.180556 35.718555 267.588235 
 127.180667 35.718555 267.353156 
 127.180778 35.718555 267.002062 
 127.180889 35.718555 266.998024 
 127.181000 35.718555 265.234915 
 127.181111 35.718555 263.991030 
 127.181222 35.718555 263.990035 
 127.181333 35.718555 263.990603 
 127.180111 35.718555 275.932250 
 127.180222 35.718555 275.935190 
 127.180333 35.718555 274.744060 
 127.180444 35.718555 270.312829 
 127.180556 35.718555 267.588235 
 127.180667 35.718555 267.353156 
 127.180778 35.718555 267.002062 
 127.180889 35.718555 266.998024 
 127.181000 35.718555 265.234915 
 127.181111 35.718555 263.991030 
 127.181222 35.718555 263.990035 
 127.181333 35.718555 263.990603 
 127.181444 35.718555 264.284937 
 127.180111 35.718667 276.327262 
 127.180222 35.718667 276.860343 
 127.180333 35.718667 276.587379 
 127.180444 35.718667 271.828609 
 127.180556 35.718667 268.574159 
 127.180667 35.718667 268.731789 
 127.180778 35.718667 266.957544 
 127.180889 35.718667 267.397924 
 127.181000 35.718667 265.133106 
 127.181111 35.718667 264.691713 
 127.181222 35.718667 264.295484 
 127.181333 35.718667 264.816184 
 127.181444 35.718667 265.226143 
 127.180111 35.718778 276.083609 
 127.180222 35.718778 277.846758 
 127.180333 35.718778 277.847142 
 127.180444 35.718778 274.835763 
 127.180556 35.718778 269.812286 
 127.180667 35.718778 268.496394 
 127.180778 35.718778 268.678094 
 127.180889 35.718778 267.394852 
 127.181000 35.718778 265.245368 
 127.181111 35.718778 265.227937 
 127.181222 35.718778 265.219049 
 127.181333 35.718778 265.229123 
 127.181444 35.718778 265.235096 
 127.180222 35.718778 277.846758 
 127.180333 35.718778 277.847142 
 127.180444 35.718778 274.835763 
 127.180556 35.718778 269.812286 
 127.180667 35.718778 268.496394 
 127.180778 35.718778 268.678094 
 127.180889 35.718778 267.394852 
 127.181000 35.718778 265.245368 
 127.181111 35.718778 265.227937 
 127.181222 35.718778 265.219049 
 127.181333 35.718778 265.229123 
 127.181444 35.718778 265.235096 
 127.181556 35.718778 265.235142 
 127.180222 35.718889 277.634414 
 127.180333 35.718889 277.633766 
 127.180444 35.718889 276.506444 
 127.180556 35.718889 271.305979 
 127.180667 35.718889 269.812135 
 127.180778 35.718889 268.496782 
 127.180889 35.718889 266.950834 
 127.181000 35.718889 267.150734 
 127.181111 35.718889 266.373777 
 127.181222 35.718889 265.020421 
 127.181333 35.718889 265.031411 
 127.181444 35.718889 265.233613 
 127.181556 35.718889 265.127653 
 127.180222 35.719000 277.631417 
 127.180333 35.719000 277.578416 
 127.180444 35.719000 277.629051 
 127.180556 35.719000 275.077374 
 127.180667 35.719000 270.308222 
 127.180778 35.719000 269.812123 
 127.180889 35.719000 267.589884 
 127.181000 35.719000 268.325356 
 127.181111 35.719000 267.398860 
 127.181222 35.719000 265.411860 
 127.181333 35.719000 265.019791 
 127.181444 35.719000 265.068874 
 127.181556 35.719000 266.271526 
 127.180222 35.719111 277.629042 
 127.180333 35.719111 279.008900 
 127.180444 35.719111 278.713450 
 127.180556 35.719111 277.846307 
 127.180667 35.719111 271.087088 
 127.180778 35.719111 270.228898 
 127.180889 35.719111 269.321604 
 127.181000 35.719111 268.503482 
 127.181111 35.719111 268.730525 
 127.181222 35.719111 266.375417 
 127.181333 35.719111 265.021949 
 127.181444 35.719111 265.709611 
 127.181556 35.719111 267.397920 
 127.180333 35.719111 279.008900 
 127.180444 35.719111 278.713450 
 127.180556 35.719111 277.846307 
 127.180667 35.719111 271.087088 
 127.180778 35.719111 270.228898 
 127.180889 35.719111 269.321604 
 127.181000 35.719111 268.503482 
 127.181111 35.719111 268.730525 
 127.181222 35.719111 266.375417 
 127.181333 35.719111 265.021949 
 127.181444 35.719111 265.709611 
 127.181556 35.719111 267.397920 
 127.181667 35.719111 269.300624 
 127.180333 35.719222 278.682052 
 127.180444 35.719222 279.959416 
 127.180556 35.719222 278.529514 
 127.180667 35.719222 272.142259 
 127.180778 35.719222 270.310820 
 127.180889 35.719222 269.730204 
 127.181000 35.719222 269.307341 
 127.181111 35.719222 268.498357 
 127.181222 35.719222 266.995564 
 127.181333 35.719222 266.370633 
 127.181444 35.719222 267.393739 
 127.181556 35.719222 268.497628 
 127.181667 35.719222 269.811895 
 127.180333 35.719333 280.397620 
 127.180444 35.719333 280.465431 
 127.180556 35.719333 279.967749 
 127.180667 35.719333 274.243120 
 127.180778 35.719333 271.106972 
 127.180889 35.719333 270.454731 
 127.181000 35.719333 269.729962 
 127.181111 35.719333 269.812131 
 127.181222 35.719333 267.940199 
 127.181333 35.719333 266.889023 
 127.181444 35.719333 268.496815 
 127.181556 35.719333 269.811079 
 127.181667 35.719333 269.503042 
 127.180444 35.719444 279.775722 
 127.180556 35.719444 280.064904 
 127.180667 35.719444 277.633348 
 127.180778 35.719444 274.250809 
 127.180889 35.719444 271.802992 
 127.181000 35.719444 270.306798 
 127.181111 35.719444 270.308582 
 127.181222 35.719444 269.502968 
 127.181333 35.719444 269.523129 
 127.181444 35.719444 269.812137 
 127.181556 35.719444 269.502587 
 127.181667 35.719444 269.671090 
 127.181778 35.719444 270.418709 
 127.180444 35.719556 280.192707 
 127.180556 35.719556 281.291081 
 127.180667 35.719556 280.467210 
 127.180778 35.719556 274.744203 
 127.180889 35.719556 273.540388 
 127.181000 35.719556 271.053138 
 127.181111 35.719556 271.087165 
 127.181222 35.719556 270.858966 
 127.181333 35.719556 269.504676 
 127.181444 35.719556 269.505061 
 127.181556 35.719556 269.758964 
 127.181667 35.719556 270.259105 
 127.181778 35.719556 270.445485 
 127.180444 35.719667 281.293345 
 127.180556 35.719667 282.795933 
 127.180667 35.719667 279.785884 
 127.180778 35.719667 275.118737 
 127.180889 35.719667 274.826703 
 127.181000 35.719667 272.867749 
 127.181111 35.719667 271.107886 
 127.181222 35.719667 271.106685 
 127.181333 35.719667 270.457241 
 127.181444 35.719667 270.448369 
 127.181556 35.719667 270.457251 
 127.181667 35.719667 270.449894 
 127.181778 35.719667 270.454546 
 127.180556 35.719667 282.795933 
 127.180667 35.719667 279.785884 
 127.180778 35.719667 275.118737 
 127.180889 35.719667 274.826703 
 127.181000 35.719667 272.867749 
 127.181111 35.719667 271.107886 
 127.181222 35.719667 271.106685 
 127.181333 35.719667 270.457241 
 127.181444 35.719667 270.448369 
 127.181556 35.719667 270.457251 
 127.181667 35.719667 270.449894 
 127.181778 35.719667 270.454546 
 127.181889 35.719667 270.457096 
 127.180556 35.719778 282.769149 
 127.180667 35.719778 280.572909 
 127.180778 35.719778 276.748310 
 127.180889 35.719778 274.734136 
 127.181000 35.719778 272.838799 
 127.181111 35.719778 272.267214 
 127.181222 35.719778 271.960853 
 127.181333 35.719778 270.805918 
 127.181444 35.719778 270.308654 
 127.181556 35.719778 270.858198 
 127.181667 35.719778 270.450032 
 127.181778 35.719778 270.457301 
 127.181889 35.719778 270.309981 
 127.180556 35.719889 280.964465 
 127.180667 35.719889 280.715794 
 127.180778 35.719889 278.715743 
 127.180889 35.719889 276.499975 
 127.181000 35.719889 274.744571 
 127.181111 35.719889 272.837239 
 127.181222 35.719889 273.723082 
 127.181333 35.719889 271.804673 
 127.181444 35.719889 271.106367 
 127.181556 35.719889 271.464607 
 127.181667 35.719889 270.847635 
 127.181778 35.719889 270.309015 
 127.181889 35.719889 272.858402 
 127.180667 35.720000 281.384337 
 127.180778 35.720000 281.340158 
 127.180889 35.720000 277.642377 
 127.181000 35.720000 275.995050 
 127.181111 35.720000 274.243782 
 127.181222 35.720000 274.713428 
 127.181333 35.720000 274.685587 
 127.181444 35.720000 271.804312 
 127.181556 35.720000 272.126050 
 127.181667 35.720000 271.106449 
 127.181778 35.720000 271.105186 
 127.181889 35.720000 274.826465 
 127.182000 35.720000 277.846931 
 127.180667 35.720111 282.930262 
 127.180778 35.720111 280.896207 
 127.180889 35.720111 277.571895 
 127.181000 35.720111 277.319954 
 127.181111 35.720111 275.125971 
 127.181222 35.720111 275.104168 
 127.181333 35.720111 274.267704 
 127.181444 35.720111 273.081530 
 127.181556 35.720111 271.801989 
 127.181667 35.720111 272.866776 
 127.181778 35.720111 271.818821 
 127.181889 35.720111 276.506089 
 127.182000 35.720111 277.630175 
 127.180667 35.720222 282.930270 
 127.180778 35.720222 282.930508 
 127.180889 35.720222 280.399442 
 127.181000 35.720222 277.633764 
 127.181111 35.720222 276.327143 
 127.181222 35.720222 275.123672 
 127.181333 35.720222 274.745064 
 127.181444 35.720222 272.837530 
 127.181556 35.720222 273.089172 
 127.181667 35.720222 271.801405 
 127.181778 35.720222 272.837475 
 127.181889 35.720222 277.307951 
 127.182000 35.720222 277.628798 
 127.180778 35.720222 282.930508 
 127.180889 35.720222 280.399442 
 127.181000 35.720222 277.633764 
 127.181111 35.720222 276.327143 
 127.181222 35.720222 275.123672 
 127.181333 35.720222 274.745064 
 127.181444 35.720222 272.837530 
 127.181556 35.720222 273.089172 
 127.181667 35.720222 271.801405 
 127.181778 35.720222 272.837475 
 127.181889 35.720222 277.307951 
 127.182000 35.720222 277.628798 
 127.182111 35.720222 278.378787 
 127.180778 35.720333 283.101583 
 127.180889 35.720333 280.893973 
 127.181000 35.720333 280.434461 
 127.181111 35.720333 277.629012 
 127.181222 35.720333 276.407598 
 127.181333 35.720333 275.119359 
 127.181444 35.720333 274.821574 
 127.181556 35.720333 273.540356 
 127.181667 35.720333 273.048777 
 127.181778 35.720333 274.723623 
 127.181889 35.720333 277.846815 
 127.182000 35.720333 277.570127 
 127.182111 35.720333 279.092627 
 127.180778 35.720444 284.127431 
 127.180889 35.720444 284.543907 
 127.181000 35.720444 283.219054 
 127.181111 35.720444 282.758612 
 127.181222 35.720444 277.300576 
 127.181333 35.720444 276.499901 
 127.181444 35.720444 274.289472 
 127.181556 35.720444 274.243095 
 127.181667 35.720444 274.809344 
 127.181778 35.720444 274.249557 
 127.181889 35.720444 277.846877 
 127.182000 35.720444 278.528929 
 127.182111 35.720444 280.398276 
 127.180778 35.720556 285.004333 
 127.180889 35.720556 285.033594 
 127.181000 35.720556 285.760947 
 127.181111 35.720556 284.317847 
 127.181222 35.720556 277.629040 
 127.181333 35.720556 276.345607 
 127.181444 35.720556 275.118274 
 127.181556 35.720556 275.106993 
 127.181667 35.720556 274.362852 
 127.181778 35.720556 274.740602 
 127.181889 35.720556 277.461309 
 127.182000 35.720556 278.673108 
 127.182111 35.720556 280.468111 
 127.180889 35.720556 285.033594 
 127.181000 35.720556 285.760947 
 127.181111 35.720556 284.317847 
 127.181222 35.720556 277.629040 
 127.181333 35.720556 276.345607 
 127.181444 35.720556 275.118274 
 127.181556 35.720556 275.106993 
 127.181667 35.720556 274.362852 
 127.181778 35.720556 274.740602 
 127.181889 35.720556 277.461309 
 127.182000 35.720556 278.673108 
 127.182111 35.720556 280.468111 
 127.182222 35.720556 280.193625 
 127.180889 35.720667 285.811242 
 127.181000 35.720667 286.209009 
 127.181111 35.720667 284.482577 
 127.181222 35.720667 278.673393 
 127.181333 35.720667 277.786528 
 127.181444 35.720667 276.135111 
 127.181556 35.720667 276.057684 
 127.181667 35.720667 275.115928 
 127.181778 35.720667 274.745541 
 127.181889 35.720667 277.307413 
 127.182000 35.720667 280.368192 
 127.182111 35.720667 279.775718 
 127.182222 35.720667 282.795793 
 127.180889 35.720778 285.758740 
 127.181000 35.720778 286.246493 
 127.181111 35.720778 285.808591 
 127.181222 35.720778 280.003558 
 127.181333 35.720778 279.097584 
 127.181444 35.720778 279.190719 
 127.181556 35.720778 278.544008 
 127.181667 35.720778 276.506448 
 127.181778 35.720778 275.129333 
 127.181889 35.720778 277.846904 
 127.182000 35.720778 279.968226 
 127.182111 35.720778 280.152679 
 127.182222 35.720778 282.929846 
 127.181000 35.720778 286.246493 
 127.181111 35.720778 285.808591 
 127.181222 35.720778 280.003558 
 127.181333 35.720778 279.097584 
 127.181444 35.720778 279.190719 
 127.181556 35.720778 278.544008 
 127.181667 35.720778 276.506448 
 127.181778 35.720778 275.129333 
 127.181889 35.720778 277.846904 
 127.182000 35.720778 279.968226 
 127.182111 35.720778 280.152679 
 127.182222 35.720778 282.929846 
 127.182333 35.720778 285.787061 
 127.181000 35.720889 286.256702 
 127.181111 35.720889 286.250479 
 127.181222 35.720889 284.579216 
 127.181333 35.720889 280.885956 
 127.181444 35.720889 280.176097 
 127.181556 35.720889 280.463024 
 127.181667 35.720889 277.847082 
 127.181778 35.720889 275.995343 
 127.181889 35.720889 277.633801 
 127.182000 35.720889 280.369082 
 127.182111 35.720889 281.079346 
 127.182222 35.720889 283.816465 
 127.182333 35.720889 286.209852 
 127.181000 35.721000 287.622210 
 127.181111 35.721000 287.871482 
 127.181222 35.721000 287.546918 
 127.181333 35.721000 285.872609 
 127.181444 35.721000 280.896794 
 127.181556 35.721000 280.192573 
 127.181667 35.721000 278.676097 
 127.181778 35.721000 277.818525 
 127.181889 35.721000 277.625109 
 127.182000 35.721000 280.111272 
 127.182111 35.721000 282.662943 
 127.182222 35.721000 285.027864 
 127.182333 35.721000 286.378610 
 127.181111 35.721000 287.871482 
 127.181222 35.721000 287.546918 
 127.181333 35.721000 285.872609 
 127.181444 35.721000 280.896794 
 127.181556 35.721000 280.192573 
 127.181667 35.721000 278.676097 
 127.181778 35.721000 277.818525 
 127.181889 35.721000 277.625109 
 127.182000 35.721000 280.111272 
 127.182111 35.721000 282.662943 
 127.182222 35.721000 285.027864 
 127.182333 35.721000 286.378610 
 127.182444 35.721000 287.002349 
 127.181111 35.721111 289.444938 
 127.181222 35.721111 289.189793 
 127.181333 35.721111 288.393398 
 127.181444 35.721111 283.093403 
 127.181556 35.721111 282.673816 
 127.181667 35.721111 279.813405 
 127.181778 35.721111 278.497997 
 127.181889 35.721111 277.801111 
 127.182000 35.721111 280.387434 
 127.182111 35.721111 280.896956 
 127.182222 35.721111 285.758802 
 127.182333 35.721111 287.849365 
 127.182444 35.721111 287.349293 
 127.181111 35.721222 289.355488 
 127.181222 35.721222 289.809972 
 127.181333 35.721222 289.195944 
 127.181444 35.721222 284.508776 
 127.181556 35.721222 282.917784 
 127.181667 35.721222 280.717800 
 127.181778 35.721222 278.715026 
 127.181889 35.721222 279.189157 
 127.182000 35.721222 280.467985 
 127.182111 35.721222 280.902607 
 127.182222 35.721222 285.759177 
 127.182333 35.721222 287.169830 
 127.182444 35.721222 288.404567 
 127.181111 35.721333 290.293077 
 127.181222 35.721333 290.672157 
 127.181333 35.721333 290.574393 
 127.181444 35.721333 287.849215 
 127.181556 35.721333 284.578714 
 127.181667 35.721333 282.723734 
 127.181778 35.721333 279.808893 
 127.181889 35.721333 280.269756 
 127.182000 35.721333 279.810860 
 127.182111 35.721333 280.896665 
 127.182222 35.721333 284.546744 
 127.182333 35.721333 287.873327 
 127.182444 35.721333 289.180533 
 127.181222 35.721333 290.672157 
 127.181333 35.721333 290.574393 
 127.181444 35.721333 287.849215 
 127.181556 35.721333 284.578714 
 127.181667 35.721333 282.723734 
 127.181778 35.721333 279.808893 
 127.181889 35.721333 280.269756 
 127.182000 35.721333 279.810860 
 127.182111 35.721333 280.896665 
 127.182222 35.721333 284.546744 
 127.182333 35.721333 287.873327 
 127.182444 35.721333 289.180533 
 127.182556 35.721333 290.674898 
 127.181222 35.721444 290.677058 
 127.181333 35.721444 291.216545 
 127.181444 35.721444 289.606560 
 127.181556 35.721444 285.844285 
 127.181667 35.721444 283.101256 
 127.181778 35.721444 282.794089 
 127.181889 35.721444 279.861716 
 127.182000 35.721444 281.289614 
 127.182111 35.721444 280.896807 
 127.182222 35.721444 285.033304 
 127.182333 35.721444 288.385583 
 127.182444 35.721444 289.366525 
 127.182556 35.721444 290.766976 
 127.181222 35.721556 291.215919 
 127.181333 35.721556 292.780974 
 127.181444 35.721556 291.072059 
 127.181556 35.721556 286.377955 
 127.181667 35.721556 283.443268 
 127.181778 35.721556 282.691483 
 127.181889 35.721556 280.895763 
 127.182000 35.721556 280.719271 
 127.182111 35.721556 282.930061 
 127.182222 35.721556 285.803518 
 127.182333 35.721556 289.328795 
 127.182444 35.721556 290.674911 
 127.182556 35.721556 291.156644 
 127.181333 35.721556 292.780974 
 127.181444 35.721556 291.072059 
 127.181556 35.721556 286.377955 
 127.181667 35.721556 283.443268 
 127.181778 35.721556 282.691483 
 127.181889 35.721556 280.895763 
 127.182000 35.721556 280.719271 
 127.182111 35.721556 282.930061 
 127.182222 35.721556 285.803518 
 127.182333 35.721556 289.328795 
 127.182444 35.721556 290.674911 
 127.182556 35.721556 291.156644 
 127.182667 35.721556 291.217652 
 127.181333 35.721667 293.463006 
 127.181444 35.721667 292.779159 
 127.181556 35.721667 289.629782 
 127.181667 35.721667 285.759547 
 127.181778 35.721667 284.567896 
 127.181889 35.721667 282.665595 
 127.182000 35.721667 282.927977 
 127.182111 35.721667 283.101411 
 127.182222 35.721667 286.208632 
 127.182333 35.721667 289.180615 
 127.182444 35.721667 290.691748 
 127.182556 35.721667 291.213897 
 127.182667 35.721667 291.858926 
 127.181333 35.721778 293.626666 
 127.181444 35.721778 293.447584 
 127.181556 35.721778 290.907602 
 127.181667 35.721778 287.345650 
 127.181778 35.721778 284.445175 
 127.181889 35.721778 283.101653 
 127.182000 35.721778 283.101788 
 127.182111 35.721778 284.499818 
 127.182222 35.721778 287.197592 
 127.182333 35.721778 289.180492 
 127.182444 35.721778 290.729932 
 127.182556 35.721778 291.216897 
 127.182667 35.721778 292.018438 
 127.181333 35.721889 293.842918 
 127.181444 35.721889 293.632923 
 127.181556 35.721889 293.438840 
 127.181667 35.721889 291.216632 
 127.181778 35.721889 286.378641 
 127.181889 35.721889 283.483185 
 127.182000 35.721889 284.999999 
 127.182111 35.721889 286.251981 
 127.182222 35.721889 287.927022 
 127.182333 35.721889 289.230694 
 127.182444 35.721889 290.987590 
 127.182556 35.721889 291.857142 
 127.182667 35.721889 292.753044 
 127.181444 35.721889 293.632923 
 127.181556 35.721889 293.438840 
 127.181667 35.721889 291.216632 
 127.181778 35.721889 286.378641 
 127.181889 35.721889 283.483185 
 127.182000 35.721889 284.999999 
 127.182111 35.721889 286.251981 
 127.182222 35.721889 287.927022 
 127.182333 35.721889 289.230694 
 127.182444 35.721889 290.987590 
 127.182556 35.721889 291.857142 
 127.182667 35.721889 292.753044 
 127.182778 35.721889 292.788263 
 127.181444 35.722000 293.850307 
 127.181556 35.722000 294.643486 
 127.181667 35.722000 293.815598 
 127.181778 35.722000 289.181780 
 127.181889 35.722000 285.836894 
 127.182000 35.722000 286.251522 
 127.182111 35.722000 287.883118 
 127.182222 35.722000 287.343989 
 127.182333 35.722000 289.184793 
 127.182444 35.722000 291.217511 
 127.182556 35.722000 292.133493 
 127.182667 35.722000 292.784943 
 127.182778 35.722000 292.941604 
 127.181444 35.722111 294.667977 
 127.181556 35.722111 296.228958 
 127.181667 35.722111 295.366058 
 127.181778 35.722111 292.105269 
 127.181889 35.722111 288.383616 
 127.182000 35.722111 289.690267 
 127.182111 35.722111 288.401570 
 127.182222 35.722111 288.293455 
 127.182333 35.722111 289.351866 
 127.182444 35.722111 292.159158 
 127.182556 35.722111 292.792615 
 127.182667 35.722111 293.158795 
 127.182778 35.722111 293.438272 
 127.181556 35.722111 296.228958 
 127.181667 35.722111 295.366058 
 127.181778 35.722111 292.105269 
 127.181889 35.722111 288.383616 
 127.182000 35.722111 289.690267 
 127.182111 35.722111 288.401570 
 127.182222 35.722111 288.293455 
 127.182333 35.722111 289.351866 
 127.182444 35.722111 292.159158 
 127.182556 35.722111 292.792615 
 127.182667 35.722111 293.158795 
 127.182778 35.722111 293.438272 
 127.182889 35.722111 293.677683 
 127.181556 35.722222 296.498962 
 127.181667 35.722222 296.488656 
 127.181778 35.722222 293.849987 
 127.181889 35.722222 291.122504 
 127.182000 35.722222 290.681777 
 127.182111 35.722222 289.181339 
 127.182222 35.722222 289.682484 
 127.182333 35.722222 290.749312 
 127.182444 35.722222 293.378485 
 127.182556 35.722222 293.448757 
 127.182667 35.722222 293.454096 
 127.182778 35.722222 293.609094 
 127.182889 35.722222 295.350883 
 127.181556 35.722333 297.641936 
 127.181667 35.722333 297.640478 
 127.181778 35.722333 295.603829 
 127.181889 35.722333 293.439073 
 127.182000 35.722333 292.019791 
 127.182111 35.722333 290.789908 
 127.182222 35.722333 289.355377 
 127.182333 35.722333 292.019204 
 127.182444 35.722333 293.551670 
 127.182556 35.722333 293.829662 
 127.182667 35.722333 293.869593 
 127.182778 35.722333 294.670371 
 127.182889 35.722333 298.461696 
 127.181556 35.722444 297.631397 
 127.181667 35.722444 297.340007 
 127.181778 35.722444 297.457609 
 127.181889 35.722444 294.670269 
 127.182000 35.722444 293.439975 
 127.182111 35.722444 292.802367 
 127.182222 35.722444 292.784876 
 127.182333 35.722444 293.439889 
 127.182444 35.722444 293.623219 
 127.182556 35.722444 295.225341 
 127.182667 35.722444 297.199908 
 127.182778 35.722444 298.145102 
 127.182889 35.722444 303.040981 
 127.181667 35.722444 297.340007 
 127.181778 35.722444 297.457609 
 127.181889 35.722444 294.670269 
 127.182000 35.722444 293.439975 
 127.182111 35.722444 292.802367 
 127.182222 35.722444 292.784876 
 127.182333 35.722444 293.439889 
 127.182444 35.722444 293.623219 
 127.182556 35.722444 295.225341 
 127.182667 35.722444 297.199908 
 127.182778 35.722444 298.145102 
 127.182889 35.722444 303.040981 
 127.183000 35.722444 309.468857 
 127.181667 35.722556 298.104739 
 127.181778 35.722556 299.453432 
 127.181889 35.722556 298.145311 
 127.182000 35.722556 294.677478 
 127.182111 35.722556 295.349969 
 127.182222 35.722556 296.486968 
 127.182333 35.722556 293.946481 
 127.182444 35.722556 293.878491 
 127.182556 35.722556 297.634428 
 127.182667 35.722556 300.192487 
 127.182778 35.722556 301.622767 
 127.182889 35.722556 305.814899 
 127.183000 35.722556 310.754844 
 127.181667 35.722667 298.461842 
 127.181778 35.722667 303.293839 
 127.181889 35.722667 301.614617 
 127.182000 35.722667 298.096565 
 127.182111 35.722667 298.461142 
 127.182222 35.722667 300.193724 
 127.182333 35.722667 296.492917 
 127.182444 35.722667 295.368648 
 127.182556 35.722667 299.417090 
 127.182667 35.722667 302.909691 
 127.182778 35.722667 304.433710 
 127.182889 35.722667 308.515230 
 127.183000 35.722667 311.109256 
 127.181778 35.722667 303.293839 
 127.181889 35.722667 301.614617 
 127.182000 35.722667 298.096565 
 127.182111 35.722667 298.461142 
 127.182222 35.722667 300.193724 
 127.182333 35.722667 296.492917 
 127.182444 35.722667 295.368648 
 127.182556 35.722667 299.417090 
 127.182667 35.722667 302.909691 
 127.182778 35.722667 304.433710 
 127.182889 35.722667 308.515230 
 127.183000 35.722667 311.109256 
 127.183111 35.722667 312.448313 
 127.181778 35.722778 303.401409 
 127.181889 35.722778 303.407738 
 127.182000 35.722778 301.671423 
 127.182111 35.722778 301.605119 
 127.182222 35.722778 301.622755 
 127.182333 35.722778 298.444394 
 127.182444 35.722778 297.330714 
 127.182556 35.722778 301.444023 
 127.182667 35.722778 303.685278 
 127.182778 35.722778 305.318329 
 127.182889 35.722778 311.030394 
 127.183000 35.722778 311.798553 
 127.183111 35.722778 311.218318 
 127.181778 35.722889 306.642312 
 127.181889 35.722889 305.512987 
 127.182000 35.722889 304.432828 
 127.182111 35.722889 303.766745 
 127.182222 35.722889 302.443513 
 127.182333 35.722889 299.989181 
 127.182444 35.722889 298.462075 
 127.182556 35.722889 303.498307 
 127.182667 35.722889 303.436469 
 127.182778 35.722889 307.152495 
 127.182889 35.722889 310.863149 
 127.183000 35.722889 312.478169 
 127.183111 35.722889 314.509471 
 127.181778 35.723000 307.211671 
 127.181889 35.723000 307.218750 
 127.182000 35.723000 305.319548 
 127.182111 35.723000 303.965731 
 127.182222 35.723000 303.291051 
 127.182333 35.723000 300.695771 
 127.182444 35.723000 299.811482 
 127.182556 35.723000 303.675685 
 127.182667 35.723000 305.291771 
 127.182778 35.723000 308.271302 
 127.182889 35.723000 311.106393 
 127.183000 35.723000 314.345908 
 127.183111 35.723000 317.406972 
 127.181889 35.723000 307.218750 
 127.182000 35.723000 305.319548 
 127.182111 35.723000 303.965731 
 127.182222 35.723000 303.291051 
 127.182333 35.723000 300.695771 
 127.182444 35.723000 299.811482 
 127.182556 35.723000 303.675685 
 127.182667 35.723000 305.291771 
 127.182778 35.723000 308.271302 
 127.182889 35.723000 311.106393 
 127.183000 35.723000 314.345908 
 127.183111 35.723000 317.406972 
 127.183222 35.723000 325.191573 
 127.181889 35.723111 305.854484 
 127.182000 35.723111 305.843727 
 127.182111 35.723111 305.318706 
 127.182222 35.723111 303.037297 
 127.182333 35.723111 302.406854 
 127.182444 35.723111 300.818897 
 127.182556 35.723111 303.351841 
 127.182667 35.723111 307.234973 
 127.182778 35.723111 308.939104 
 127.182889 35.723111 311.117270 
 127.183000 35.723111 315.404650 
 127.183111 35.723111 322.968870 
 127.183222 35.723111 330.568572 
 127.181889 35.723222 308.291854 
 127.182000 35.723222 308.943995 
 127.182111 35.723222 308.301854 
 127.182222 35.723222 304.850987 
 127.182333 35.723222 302.589100 
 127.182444 35.723222 301.617223 
 127.182556 35.723222 306.826455 
 127.182667 35.723222 308.309794 
 127.182778 35.723222 310.863345 
 127.182889 35.723222 313.867664 
 127.183000 35.723222 317.569437 
 127.183111 35.723222 327.276318 
 127.183222 35.723222 334.532158 
 127.182000 35.723222 308.943995 
 127.182111 35.723222 308.301854 
 127.182222 35.723222 304.850987 
 127.182333 35.723222 302.589100 
 127.182444 35.723222 301.617223 
 127.182556 35.723222 306.826455 
 127.182667 35.723222 308.309794 
 127.182778 35.723222 310.863345 
 127.182889 35.723222 313.867664 
 127.183000 35.723222 317.569437 
 127.183111 35.723222 327.276318 
 127.183222 35.723222 334.532158 
 127.183333 35.723222 336.825622 
 127.182000 35.723333 309.477464 
 127.182111 35.723333 308.679791 
 127.182222 35.723333 305.764116 
 127.182333 35.723333 303.353630 
 127.182444 35.723333 304.433778 
 127.182556 35.723333 308.302239 
 127.182667 35.723333 308.515274 
 127.182778 35.723333 311.262698 
 127.182889 35.723333 317.567722 
 127.183000 35.723333 324.415301 
 127.183111 35.723333 330.590238 
 127.183222 35.723333 335.739290 
 127.183333 35.723333 336.206363 
 127.182000 35.723444 308.441111 
 127.182111 35.723444 309.287535 
 127.182222 35.723444 308.445648 
 127.182333 35.723444 306.559946 
 127.182444 35.723444 305.761986 
 127.182556 35.723444 308.511741 
 127.182667 35.723444 310.861161 
 127.182778 35.723444 316.991219 
 127.182889 35.723444 323.689458 
 127.183000 35.723444 326.671346 
 127.183111 35.723444 333.145250 
 127.183222 35.723444 335.938088 
 127.183333 35.723444 338.844287 
 127.182111 35.723444 309.287535 
 127.182222 35.723444 308.445648 
 127.182333 35.723444 306.559946 
 127.182444 35.723444 305.761986 
 127.182556 35.723444 308.511741 
 127.182667 35.723444 310.861161 
 127.182778 35.723444 316.991219 
 127.182889 35.723444 323.689458 
 127.183000 35.723444 326.671346 
 127.183111 35.723444 333.145250 
 127.183222 35.723444 335.938088 
 127.183333 35.723444 338.844287 
 127.183444 35.723444 342.657657 
 127.182111 35.723556 309.415303 
 127.182222 35.723556 308.524465 
 127.182333 35.723556 308.309898 
 127.182444 35.723556 309.316591 
 127.182556 35.723556 312.478654 
 127.182667 35.723556 313.813439 
 127.182778 35.723556 317.864566 
 127.182889 35.723556 323.974442 
 127.183000 35.723556 327.278122 
 127.183111 35.723556 332.540027 
 127.183222 35.723556 336.060424 
 127.183333 35.723556 341.073876 
 127.183444 35.723556 344.922461 
 127.182111 35.723667 308.757261 
 127.182222 35.723667 308.552969 
 127.182333 35.723667 309.669186 
 127.182444 35.723667 310.786180 
 127.182556 35.723667 313.321809 
 127.182667 35.723667 313.824535 
 127.182778 35.723667 321.851664 
 127.182889 35.723667 325.247711 
 127.183000 35.723667 327.276757 
 127.183111 35.723667 332.540833 
 127.183222 35.723667 336.223535 
 127.183333 35.723667 343.060608 
 127.183444 35.723667 345.947546 
 127.182111 35.723778 308.901760 
 127.182222 35.723778 309.736121 
 127.182333 35.723778 309.457913 
 127.182444 35.723778 311.221272 
 127.182556 35.723778 313.270111 
 127.182667 35.723778 315.615843 
 127.182778 35.723778 322.851679 
 127.182889 35.723778 325.714344 
 127.183000 35.723778 327.515756 
 127.183111 35.723778 332.600528 
 127.183222 35.723778 338.277858 
 127.183333 35.723778 343.788550 
 127.183444 35.723778 345.956405 
 127.182222 35.723778 309.736121 
 127.182333 35.723778 309.457913 
 127.182444 35.723778 311.221272 
 127.182556 35.723778 313.270111 
 127.182667 35.723778 315.615843 
 127.182778 35.723778 322.851679 
 127.182889 35.723778 325.714344 
 127.183000 35.723778 327.515756 
 127.183111 35.723778 332.600528 
 127.183222 35.723778 338.277858 
 127.183333 35.723778 343.788550 
 127.183444 35.723778 345.956405 
 127.183556 35.723778 347.426844 
 127.182222 35.723889 308.648454 
 127.182333 35.723889 311.804513 
 127.182444 35.723889 314.507940 
 127.182556 35.723889 316.993364 
 127.182667 35.723889 318.037350 
 127.182778 35.723889 323.367531 
 127.182889 35.723889 324.792105 
 127.183000 35.723889 328.585154 
 127.183111 35.723889 332.539943 
 127.183222 35.723889 338.277363 
 127.183333 35.723889 344.752473 
 127.183444 35.723889 345.968769 
 127.183556 35.723889 347.176490 
 127.182222 35.724000 310.746973 
 127.182333 35.724000 313.253061 
 127.182444 35.724000 315.074948 
 127.182556 35.724000 315.595321 
 127.182667 35.724000 318.088936 
 127.182778 35.724000 323.164720 
 127.182889 35.724000 326.812975 
 127.183000 35.724000 329.742606 
 127.183111 35.724000 334.532377 
 127.183222 35.724000 336.984080 
 127.183333 35.724000 344.256860 
 127.183444 35.724000 346.399069 
 127.183556 35.724000 348.879055 
 127.182333 35.724000 313.253061 
 127.182444 35.724000 315.074948 
 127.182556 35.724000 315.595321 
 127.182667 35.724000 318.088936 
 127.182778 35.724000 323.164720 
 127.182889 35.724000 326.812975 
 127.183000 35.724000 329.742606 
 127.183111 35.724000 334.532377 
 127.183222 35.724000 336.984080 
 127.183333 35.724000 344.256860 
 127.183444 35.724000 346.399069 
 127.183556 35.724000 348.879055 
 127.183667 35.724000 352.177383 
 127.182333 35.724111 315.057292 
 127.182444 35.724111 316.644444 
 127.182556 35.724111 317.758654 
 127.182667 35.724111 321.319232 
 127.182778 35.724111 324.756628 
 127.182889 35.724111 327.372691 
 127.183000 35.724111 330.589184 
 127.183111 35.724111 334.333113 
 127.183222 35.724111 335.989709 
 127.183333 35.724111 342.656254 
 127.183444 35.724111 346.414225 
 127.183556 35.724111 351.480779 
 127.183667 35.724111 352.945879 
 127.182333 35.724222 316.641649 
 127.182444 35.724222 317.405977 
 127.182556 35.724222 320.080361 
 127.182667 35.724222 324.408766 
 127.182778 35.724222 325.242573 
 127.182889 35.724222 326.817916 
 127.183000 35.724222 330.593497 
 127.183111 35.724222 334.332823 
 127.183222 35.724222 337.141524 
 127.183333 35.724222 341.427031 
 127.183444 35.724222 345.959335 
 127.183556 35.724222 352.089039 
 127.183667 35.724222 353.883061 
 127.182444 35.724333 318.087914 
 127.182556 35.724333 323.903335 
 127.182667 35.724333 325.250630 
 127.182778 35.724333 325.732126 
 127.182889 35.724333 325.719324 
 127.183000 35.724333 329.761188 
 127.183111 35.724333 334.338516 
 127.183222 35.724333 335.948436 
 127.183333 35.724333 338.672604 
 127.183444 35.724333 345.846636 
 127.183556 35.724333 352.177056 
 127.183667 35.724333 353.957829 
 127.183778 35.724333 355.477886 
 127.182444 35.724444 319.638611 
 127.182556 35.724444 323.675028 
 127.182667 35.724444 324.795254 
 127.182778 35.724444 325.732412 
 127.182889 35.724444 325.192484 
 127.183000 35.724444 328.337429 
 127.183111 35.724444 334.396226 
 127.183222 35.724444 337.176114 
 127.183333 35.724444 337.520207 
 127.183444 35.724444 342.590604 
 127.183556 35.724444 351.102706 
 127.183667 35.724444 354.092037 
 127.183778 35.724444 357.321061 
 127.182444 35.724556 321.320960 
 127.182556 35.724556 325.222388 
 127.182667 35.724556 326.535988 
 127.182778 35.724556 325.552310 
 127.182889 35.724556 324.810546 
 127.183000 35.724556 326.992948 
 127.183111 35.724556 333.500821 
 127.183222 35.724556 337.204813 
 127.183333 35.724556 338.278027 
 127.183444 35.724556 342.443910 
 127.183556 35.724556 350.740723 
 127.183667 35.724556 353.044033 
 127.183778 35.724556 358.459491 
 127.182556 35.724556 325.222388 
 127.182667 35.724556 326.535988 
 127.182778 35.724556 325.552310 
 127.182889 35.724556 324.810546 
 127.183000 35.724556 326.992948 
 127.183111 35.724556 333.500821 
 127.183222 35.724556 337.204813 
 127.183333 35.724556 338.278027 
 127.183444 35.724556 342.443910 
 127.183556 35.724556 350.740723 
 127.183667 35.724556 353.044033 
 127.183778 35.724556 358.459491 
 127.183889 35.724556 362.074877 
 127.182556 35.724667 324.792930 
 127.182667 35.724667 327.382940 
 127.182778 35.724667 327.382952 
 127.182889 35.724667 325.685822 
 127.183000 35.724667 326.844111 
 127.183111 35.724667 332.504960 
 127.183222 35.724667 335.976434 
 127.183333 35.724667 338.277969 
 127.183444 35.724667 341.443984 
 127.183556 35.724667 348.942094 
 127.183667 35.724667 352.176956 
 127.183778 35.724667 358.047267 
 127.183889 35.724667 361.905844 
 127.182556 35.724778 327.223975 
 127.182667 35.724778 328.927493 
 127.182778 35.724778 330.467898 
 127.182889 35.724778 327.305594 
 127.183000 35.724778 328.324690 
 127.183111 35.724778 332.573801 
 127.183222 35.724778 335.196261 
 127.183333 35.724778 339.269001 
 127.183444 35.724778 341.238912 
 127.183556 35.724778 347.867772 
 127.183667 35.724778 352.845969 
 127.183778 35.724778 358.388439 
 127.183889 35.724778 361.015162 
 127.182667 35.724778 328.927493 
 127.182778 35.724778 330.467898 
 127.182889 35.724778 327.305594 
 127.183000 35.724778 328.324690 
 127.183111 35.724778 332.573801 
 127.183222 35.724778 335.196261 
 127.183333 35.724778 339.269001 
 127.183444 35.724778 341.238912 
 127.183556 35.724778 347.867772 
 127.183667 35.724778 352.845969 
 127.183778 35.724778 358.388439 
 127.183889 35.724778 361.015162 
 127.184000 35.724778 362.469645 
 127.182667 35.724889 334.532435 
 127.182778 35.724889 338.214580 
 127.182889 35.724889 333.512557 
 127.183000 35.724889 330.467769 
 127.183111 35.724889 333.512616 
 127.183222 35.724889 335.253117 
 127.183333 35.724889 340.138409 
 127.183444 35.724889 344.750330 
 127.183556 35.724889 347.892945 
 127.183667 35.724889 349.786831 
 127.183778 35.724889 358.063911 
 127.183889 35.724889 362.431475 
 127.184000 35.724889 365.291600 
 127.182667 35.725000 340.442499 
 127.182778 35.725000 341.936947 
 127.182889 35.725000 337.519211 
 127.183000 35.725000 334.532389 
 127.183111 35.725000 332.540102 
 127.183222 35.725000 335.253145 
 127.183333 35.725000 343.886994 
 127.183444 35.725000 345.958310 
 127.183556 35.725000 348.953608 
 127.183667 35.725000 352.853226 
 127.183778 35.725000 360.453973 
 127.183889 35.725000 365.271180 
 127.184000 35.725000 371.895371 
 127.182667 35.725111 342.588611 
 127.182778 35.725111 344.253819 
 127.182889 35.725111 342.659447 
 127.183000 35.725111 337.758148 
 127.183111 35.725111 335.377171 
 127.183222 35.725111 336.817764 
 127.183333 35.725111 345.952181 
 127.183444 35.725111 347.208702 
 127.183556 35.725111 352.173200 
 127.183667 35.725111 354.160923 
 127.183778 35.725111 362.011262 
 127.183889 35.725111 365.240858 
 127.184000 35.725111 374.757232 
 127.182778 35.725111 344.253819 
 127.182889 35.725111 342.659447 
 127.183000 35.725111 337.758148 
 127.183111 35.725111 335.377171 
 127.183222 35.725111 336.817764 
 127.183333 35.725111 345.952181 
 127.183444 35.725111 347.208702 
 127.183556 35.725111 352.173200 
 127.183667 35.725111 354.160923 
 127.183778 35.725111 362.011262 
 127.183889 35.725111 365.240858 
 127.184000 35.725111 374.757232 
 127.184111 35.725111 379.823048 
 127.182778 35.725222 345.015032 
 127.182889 35.725222 345.945666 
 127.183000 35.725222 344.909251 
 127.183111 35.725222 341.052036 
 127.183222 35.725222 340.135478 
 127.183333 35.725222 347.877210 
 127.183444 35.725222 347.603216 
 127.183556 35.725222 356.713651 
 127.183667 35.725222 361.298577 
 127.183778 35.725222 364.547470 
 127.183889 35.725222 368.731857 
 127.184000 35.725222 376.974667 
 127.184111 35.725222 379.986964 
 127.182778 35.725333 345.945839 
 127.182889 35.725333 347.172945 
 127.183000 35.725333 349.418713 
 127.183111 35.725333 345.952251 
 127.183222 35.725333 344.749881 
 127.183333 35.725333 348.955879 
 127.183444 35.725333 349.835680 
 127.183556 35.725333 362.489018 
 127.183667 35.725333 365.291394 
 127.183778 35.725333 370.883310 
 127.183889 35.725333 372.719021 
 127.184000 35.725333 379.088947 
 127.184111 35.725333 383.363913 
 127.182889 35.725333 347.172945 
 127.183000 35.725333 349.418713 
 127.183111 35.725333 345.952251 
 127.183222 35.725333 344.749881 
 127.183333 35.725333 348.955879 
 127.183444 35.725333 349.835680 
 127.183556 35.725333 362.489018 
 127.183667 35.725333 365.291394 
 127.183778 35.725333 370.883310 
 127.183889 35.725333 372.719021 
 127.184000 35.725333 379.088947 
 127.184111 35.725333 383.363913 
 127.184222 35.725333 396.203349 
 127.182889 35.725444 350.743819 
 127.183000 35.725444 352.176842 
 127.183111 35.725444 349.834729 
 127.183222 35.725444 345.947513 
 127.183333 35.725444 348.882789 
 127.183444 35.725444 351.142459 
 127.183556 35.725444 363.013135 
 127.183667 35.725444 365.198547 
 127.183778 35.725444 377.003117 
 127.183889 35.725444 379.459609 
 127.184000 35.725444 379.351822 
 127.184111 35.725444 387.379819 
 127.184222 35.725444 398.912105 
 127.182889 35.725556 352.136799 
 127.183000 35.725556 352.933637 
 127.183111 35.725556 352.184558 
 127.183222 35.725556 347.174197 
 127.183333 35.725556 352.108422 
 127.183444 35.725556 351.966580 
 127.183556 35.725556 363.034293 
 127.183667 35.725556 365.976439 
 127.183778 35.725556 383.271353 
 127.183889 35.725556 384.179067 
 127.184000 35.725556 383.359746 
 127.184111 35.725556 393.141154 
 127.184222 35.725556 401.864724 
 127.183000 35.725556 352.933637 
 127.183111 35.725556 352.184558 
 127.183222 35.725556 347.174197 
 127.183333 35.725556 352.108422 
 127.183444 35.725556 351.966580 
 127.183556 35.725556 363.034293 
 127.183667 35.725556 365.976439 
 127.183778 35.725556 383.271353 
 127.183889 35.725556 384.179067 
 127.184000 35.725556 383.359746 
 127.184111 35.725556 393.141154 
 127.184222 35.725556 401.864724 
 127.184333 35.725556 404.337338 
 127.183000 35.725667 354.013473 
 127.183111 35.725667 356.331007 
 127.183222 35.725667 355.363130 
 127.183333 35.725667 352.182997 
 127.183444 35.725667 352.949691 
 127.183556 35.725667 365.293378 
 127.183667 35.725667 367.522001 
 127.183778 35.725667 383.496435 
 127.183889 35.725667 384.393096 
 127.184000 35.725667 387.440238 
 127.184111 35.725667 398.081449 
 127.184222 35.725667 403.994570 
 127.184333 35.725667 409.062319 
 127.183000 35.725778 355.144282 
 127.183111 35.725778 362.412555 
 127.183222 35.725778 364.532702 
 127.183333 35.725778 357.321998 
 127.183444 35.725778 357.315624 
 127.183556 35.725778 365.242112 
 127.183667 35.725778 369.171463 
 127.183778 35.725778 383.388092 
 127.183889 35.725778 385.832619 
 127.184000 35.725778 394.350226 
 127.184111 35.725778 400.933000 
 127.184222 35.725778 407.623169 
 127.184333 35.725778 413.077176 
 127.183000 35.725889 358.153111 
 127.183111 35.725889 368.109967 
 127.183222 35.725889 368.731350 
 127.183333 35.725889 362.002989 
 127.183444 35.725889 362.002825 
 127.183556 35.725889 370.507263 
 127.183667 35.725889 372.719116 
 127.183778 35.725889 383.358480 
 127.183889 35.725889 386.051238 
 127.184000 35.725889 397.370144 
 127.184111 35.725889 401.820686 
 127.184222 35.725889 407.981834 
 127.184333 35.725889 414.619796 
 127.183111 35.725889 368.109967 
 127.183222 35.725889 368.731350 
 127.183333 35.725889 362.002989 
 127.183444 35.725889 362.002825 
 127.183556 35.725889 370.507263 
 127.183667 35.725889 372.719116 
 127.183778 35.725889 383.358480 
 127.183889 35.725889 386.051238 
 127.184000 35.725889 397.370144 
 127.184111 35.725889 401.820686 
 127.184222 35.725889 407.981834 
 127.184333 35.725889 414.619796 
 127.184444 35.725889 417.587534 
 127.183111 35.726000 369.168147 
 127.183222 35.726000 369.164287 
 127.183333 35.726000 364.855746 
 127.183444 35.726000 364.531204 
 127.183556 35.726000 372.108399 
 127.183667 35.726000 375.160050 
 127.183778 35.726000 383.287124 
 127.183889 35.726000 386.773607 
 127.184000 35.726000 397.116284 
 127.184111 35.726000 401.830048 
 127.184222 35.726000 413.079324 
 127.184333 35.726000 415.859260 
 127.184444 35.726000 419.409408 
 127.183111 35.726111 370.877247 
 127.183222 35.726111 369.155263 
 127.183333 35.726111 364.532201 
 127.183444 35.726111 365.095265 
 127.183556 35.726111 371.837106 
 127.183667 35.726111 375.172350 
 127.183778 35.726111 383.360211 
 127.183889 35.726111 387.382005 
 127.184000 35.726111 396.070791 
 127.184111 35.726111 401.969484 
 127.184222 35.726111 413.080397 
 127.184333 35.726111 416.202958 
 127.184444 35.726111 420.183241 
 127.183222 35.726111 369.155263 
 127.183333 35.726111 364.532201 
 127.183444 35.726111 365.095265 
 127.183556 35.726111 371.837106 
 127.183667 35.726111 375.172350 
 127.183778 35.726111 383.360211 
 127.183889 35.726111 387.382005 
 127.184000 35.726111 396.070791 
 127.184111 35.726111 401.969484 
 127.184222 35.726111 413.080397 
 127.184333 35.726111 416.202958 
 127.184444 35.726111 420.183241 
 127.184556 35.726111 423.508554 
 127.183222 35.726222 369.012373 
 127.183333 35.726222 365.011047 
 127.183444 35.726222 365.283437 
 127.183556 35.726222 371.775862 
 127.183667 35.726222 375.137652 
 127.183778 35.726222 384.984010 
 127.183889 35.726222 391.193059 
 127.184000 35.726222 396.169639 
 127.184111 35.726222 402.765937 
 127.184222 35.726222 409.807595 
 127.184333 35.726222 416.132517 
 127.184444 35.726222 421.837291 
 127.184556 35.726222 423.545453 
 127.183222 35.726333 369.152099 
 127.183333 35.726333 369.154824 
 127.183444 35.726333 370.808977 
 127.183556 35.726333 372.710058 
 127.183667 35.726333 376.979844 
 127.183778 35.726333 386.773127 
 127.183889 35.726333 393.002231 
 127.184000 35.726333 396.183989 
 127.184111 35.726333 404.011059 
 127.184222 35.726333 408.708343 
 127.184333 35.726333 414.563632 
 127.184444 35.726333 422.500164 
 127.184556 35.726333 423.545991 
 127.183333 35.726333 369.154824 
 127.183444 35.726333 370.808977 
 127.183556 35.726333 372.710058 
 127.183667 35.726333 376.979844 
 127.183778 35.726333 386.773127 
 127.183889 35.726333 393.002231 
 127.184000 35.726333 396.183989 
 127.184111 35.726333 404.011059 
 127.184222 35.726333 408.708343 
 127.184333 35.726333 414.563632 
 127.184444 35.726333 422.500164 
 127.184556 35.726333 423.545991 
 127.184667 35.726333 427.392461 
 127.183333 35.726445 377.080897 
 127.183444 35.726445 379.823596 
 127.183556 35.726445 377.798477 
 127.183667 35.726445 380.984461 
 127.183778 35.726445 386.810706 
 127.183889 35.726445 393.151942 
 127.184000 35.726445 396.165149 
 127.184111 35.726445 404.337938 
 127.184222 35.726445 407.604503 
 127.184333 35.726445 413.641149 
 127.184444 35.726445 422.494441 
 127.184556 35.726445 423.542351 
 127.184667 35.726445 429.047057 
 127.183333 35.726556 383.365045 
 127.183444 35.726556 384.076073 
 127.183556 35.726556 379.821954 
 127.183667 35.726556 384.669541 
 127.183778 35.726556 386.774365 
 127.183889 35.726556 393.168932 
 127.184000 35.726556 399.173230 
 127.184111 35.726556 405.642281 
 127.184222 35.726556 407.230103 
 127.184333 35.726556 413.869084 
 127.184444 35.726556 420.514102 
 127.184556 35.726556 422.854403 
 127.184667 35.726556 430.249164 
 127.183333 35.726667 384.372256 
 127.183444 35.726667 384.372498 
 127.183556 35.726667 382.086911 
 127.183667 35.726667 384.727258 
 127.183778 35.726667 387.381664 
 127.183889 35.726667 393.794348 
 127.184000 35.726667 401.811152 
 127.184111 35.726667 405.644178 
 127.184222 35.726667 409.850265 
 127.184333 35.726667 414.713149 
 127.184444 35.726667 420.217358 
 127.184556 35.726667 422.804750 
 127.184667 35.726667 430.278156 
 127.183444 35.726667 384.372498 
 127.183556 35.726667 382.086911 
 127.183667 35.726667 384.727258 
 127.183778 35.726667 387.381664 
 127.183889 35.726667 393.794348 
 127.184000 35.726667 401.811152 
 127.184111 35.726667 405.644178 
 127.184222 35.726667 409.850265 
 127.184333 35.726667 414.713149 
 127.184444 35.726667 420.217358 
 127.184556 35.726667 422.804750 
 127.184667 35.726667 430.278156 
 127.184778 35.726667 431.840388 
 127.183444 35.726778 385.819525 
 127.183556 35.726778 387.386328 
 127.183667 35.726778 389.101754 
 127.183778 35.726778 391.126298 
 127.183889 35.726778 394.077549 
 127.184000 35.726778 402.769696 
 127.184111 35.726778 405.897748 
 127.184222 35.726778 413.079998 
 127.184333 35.726778 416.224978 
 127.184444 35.726778 420.206155 
 127.184556 35.726778 422.847335 
 127.184667 35.726778 431.118780 
 127.184778 35.726778 434.281530 
 127.183444 35.726889 386.774784 
 127.183556 35.726889 396.185419 
 127.183667 35.726889 396.184871 
 127.183778 35.726889 393.958053 
 127.183889 35.726889 396.178862 
 127.184000 35.726889 403.996278 
 127.184111 35.726889 405.914084 
 127.184222 35.726889 414.081608 
 127.184333 35.726889 417.058397 
 127.184444 35.726889 421.785105 
 127.184556 35.726889 425.432479 
 127.184667 35.726889 431.838183 
 127.184778 35.726889 437.850092 
 127.183556 35.726889 396.185419 
 127.183667 35.726889 396.184871 
 127.183778 35.726889 393.958053 
 127.183889 35.726889 396.178862 
 127.184000 35.726889 403.996278 
 127.184111 35.726889 405.914084 
 127.184222 35.726889 414.081608 
 127.184333 35.726889 417.058397 
 127.184444 35.726889 421.785105 
 127.184556 35.726889 425.432479 
 127.184667 35.726889 431.838183 
 127.184778 35.726889 437.850092 
 127.184889 35.726889 447.767210 
 127.183556 35.727000 396.065402 
 127.183667 35.727000 400.945218 
 127.183778 35.727000 400.945244 
 127.183889 35.727000 400.600938 
 127.184000 35.727000 405.018319 
 127.184111 35.727000 407.622088 
 127.184222 35.727000 414.713141 
 127.184333 35.727000 416.611567 
 127.184444 35.727000 425.722716 
 127.184556 35.727000 429.046842 
 127.184667 35.727000 437.072263 
 127.184778 35.727000 444.761672 
 127.184889 35.727000 451.164377 
 127.183556 35.727111 400.197778 
 127.183667 35.727111 406.196040 
 127.183778 35.727111 408.705176 
 127.183889 35.727111 404.328438 
 127.184000 35.727111 405.917622 
 127.184111 35.727111 409.260968 
 127.184222 35.727111 416.206136 
 127.184333 35.727111 420.322874 
 127.184444 35.727111 428.894958 
 127.184556 35.727111 431.860409 
 127.184667 35.727111 441.173797 
 127.184778 35.727111 448.585254 
 127.184889 35.727111 453.008529 
 127.183667 35.727111 406.196040 
 127.183778 35.727111 408.705176 
 127.183889 35.727111 404.328438 
 127.184000 35.727111 405.917622 
 127.184111 35.727111 409.260968 
 127.184222 35.727111 416.206136 
 127.184333 35.727111 420.322874 
 127.184444 35.727111 428.894958 
 127.184556 35.727111 431.860409 
 127.184667 35.727111 441.173797 
 127.184778 35.727111 448.585254 
 127.184889 35.727111 453.008529 
 127.185000 35.727111 463.317818 
 127.183667 35.727222 409.797937 
 127.183778 35.727222 412.270837 
 127.183889 35.727222 407.230148 
 127.184000 35.727222 409.105845 
 127.184111 35.727222 413.902277 
 127.184222 35.727222 417.207500 
 127.184333 35.727222 420.931160 
 127.184444 35.727222 429.133460 
 127.184556 35.727222 436.394836 
 127.184667 35.727222 444.128676 
 127.184778 35.727222 449.632986 
 127.184889 35.727222 456.519812 
 127.185000 35.727222 468.275527 
 127.183667 35.727333 413.080766 
 127.183778 35.727333 413.909709 
 127.183889 35.727333 412.290251 
 127.184000 35.727333 412.247820 
 127.184111 35.727333 417.585093 
 127.184222 35.727333 416.751089 
 127.184333 35.727333 422.479643 
 127.184444 35.727333 430.245834 
 127.184556 35.727333 437.084632 
 127.184667 35.727333 444.069986 
 127.184778 35.727333 450.813741 
 127.184889 35.727333 458.427323 
 127.185000 35.727333 469.004493 
 127.183778 35.727333 413.909709 
 127.183889 35.727333 412.290251 
 127.184000 35.727333 412.247820 
 127.184111 35.727333 417.585093 
 127.184222 35.727333 416.751089 
 127.184333 35.727333 422.479643 
 127.184444 35.727333 430.245834 
 127.184556 35.727333 437.084632 
 127.184667 35.727333 444.069986 
 127.184778 35.727333 450.813741 
 127.184889 35.727333 458.427323 
 127.185000 35.727333 469.004493 
 127.185111 35.727333 470.056426 
 127.183778 35.727445 420.316457 
 127.183889 35.727445 422.499279 
 127.184000 35.727445 416.204679 
 127.184111 35.727445 419.422421 
 127.184222 35.727445 420.185144 
 127.184333 35.727445 422.527254 
 127.184444 35.727445 431.476737 
 127.184556 35.727445 437.849063 
 127.184667 35.727445 442.554443 
 127.184778 35.727445 451.188984 
 127.184889 35.727445 461.376537 
 127.185000 35.727445 469.265665 
 127.185111 35.727445 471.754676 
 127.183778 35.727556 429.050007 
 127.183889 35.727556 430.249612 
 127.184000 35.727556 420.312135 
 127.184111 35.727556 420.314475 
 127.184222 35.727556 422.093526 
 127.184333 35.727556 422.851016 
 127.184444 35.727556 432.067522 
 127.184556 35.727556 437.852693 
 127.184667 35.727556 441.158947 
 127.184778 35.727556 450.872929 
 127.184889 35.727556 461.895852 
 127.185000 35.727556 470.064705 
 127.185111 35.727556 473.729079 
 127.183778 35.727667 431.863382 
 127.183889 35.727667 432.248975 
 127.184000 35.727667 425.751765 
 127.184111 35.727667 422.500509 
 127.184222 35.727667 423.560403 
 127.184333 35.727667 425.744779 
 127.184444 35.727667 434.542320 
 127.184556 35.727667 438.007947 
 127.184667 35.727667 441.183933 
 127.184778 35.727667 453.004155 
 127.184889 35.727667 460.325852 
 127.185000 35.727667 471.058239 
 127.185111 35.727667 476.920351 
 127.183889 35.727667 432.248975 
 127.184000 35.727667 425.751765 
 127.184111 35.727667 422.500509 
 127.184222 35.727667 423.560403 
 127.184333 35.727667 425.744779 
 127.184444 35.727667 434.542320 
 127.184556 35.727667 438.007947 
 127.184667 35.727667 441.183933 
 127.184778 35.727667 453.004155 
 127.184889 35.727667 460.325852 
 127.185000 35.727667 471.058239 
 127.185111 35.727667 476.920351 
 127.185222 35.727667 487.675779 
 127.183889 35.727778 437.072603 
 127.184000 35.727778 439.462077 
 127.184111 35.727778 430.318403 
 127.184222 35.727778 431.605774 
 127.184333 35.727778 430.247247 
 127.184444 35.727778 436.409255 
 127.184556 35.727778 439.821266 
 127.184667 35.727778 442.577886 
 127.184778 35.727778 453.365449 
 127.184889 35.727778 460.123027 
 127.185000 35.727778 473.318799 
 127.185111 35.727778 479.859527 
 127.185222 35.727778 489.504100 
 127.183889 35.727889 444.767544 
 127.184000 35.727889 448.726729 
 127.184111 35.727889 442.560428 
 127.184222 35.727889 441.161012 
 127.184333 35.727889 435.786726 
 127.184444 35.727889 437.056387 
 127.184556 35.727889 440.049931 
 127.184667 35.727889 444.713501 
 127.184778 35.727889 453.306069 
 127.184889 35.727889 460.134543 
 127.185000 35.727889 473.525900 
 127.185111 35.727889 480.680899 
 127.185222 35.727889 493.695461 
 127.184000 35.727889 448.726729 
 127.184111 35.727889 442.560428 
 127.184222 35.727889 441.161012 
 127.184333 35.727889 435.786726 
 127.184444 35.727889 437.056387 
 127.184556 35.727889 440.049931 
 127.184667 35.727889 444.713501 
 127.184778 35.727889 453.306069 
 127.184889 35.727889 460.134543 
 127.185000 35.727889 473.525900 
 127.185111 35.727889 480.680899 
 127.185222 35.727889 493.695461 
 127.185333 35.727889 495.666347 
 127.184000 35.728000 449.714769 
 127.184111 35.728000 448.637732 
 127.184222 35.728000 446.888075 
 127.184333 35.728000 437.850118 
 127.184444 35.728000 437.279844 
 127.184556 35.728000 440.396974 
 127.184667 35.728000 444.764866 
 127.184778 35.728000 453.035898 
 127.184889 35.728000 461.287472 
 127.185000 35.728000 473.527629 
 127.185111 35.728000 480.703926 
 127.185222 35.728000 493.926540 
 127.185333 35.728000 496.128440 
 127.184000 35.728111 451.153077 
 127.184111 35.728111 449.637044 
 127.184222 35.728111 450.834744 
 127.184333 35.728111 442.568223 
 127.184444 35.728111 440.261376 
 127.184556 35.728111 442.407775 
 127.184667 35.728111 446.291682 
 127.184778 35.728111 453.851329 
 127.184889 35.728111 464.195021 
 127.185000 35.728111 474.437732 
 127.185111 35.728111 480.681763 
 127.185222 35.728111 493.929887 
 127.185333 35.728111 496.421221 
 127.184111 35.728111 449.637044 
 127.184222 35.728111 450.834744 
 127.184333 35.728111 442.568223 
 127.184444 35.728111 440.261376 
 127.184556 35.728111 442.407775 
 127.184667 35.728111 446.291682 
 127.184778 35.728111 453.851329 
 127.184889 35.728111 464.195021 
 127.185000 35.728111 474.437732 
 127.185111 35.728111 480.681763 
 127.185222 35.728111 493.929887 
 127.185333 35.728111 496.421221 
 127.185444 35.728111 504.203821 
 127.184111 35.728222 450.903353 
 127.184222 35.728222 456.635326 
 127.184333 35.728222 450.864932 
 127.184444 35.728222 448.866604 
 127.184556 35.728222 446.253830 
 127.184667 35.728222 448.257593 
 127.184778 35.728222 455.479673 
 127.184889 35.728222 467.570885 
 127.185000 35.728222 474.219139 
 127.185111 35.728222 479.813736 
 127.185222 35.728222 493.996700 
 127.185333 35.728222 500.879551 
 127.185444 35.728222 508.136741 
 127.184111 35.728333 460.119791 
 127.184222 35.728333 468.238846 
 127.184333 35.728333 460.171997 
 127.184444 35.728333 453.206286 
 127.184556 35.728333 451.227973 
 127.184667 35.728333 451.749792 
 127.184778 35.728333 456.578916 
 127.184889 35.728333 471.755827 
 127.185000 35.728333 474.211735 
 127.185111 35.728333 478.175914 
 127.185222 35.728333 496.423205 
 127.185333 35.728333 501.396561 
 127.185444 35.728333 508.150865 
 127.184111 35.728445 470.026859 
 127.184222 35.728445 473.510999 
 127.184333 35.728445 463.353194 
 127.184444 35.728445 458.435131 
 127.184556 35.728445 457.674420 
 127.184667 35.728445 455.421886 
 127.184778 35.728445 457.676596 
 127.184889 35.728445 472.478969 
 127.185000 35.728445 476.482695 
 127.185111 35.728445 479.859503 
 127.185222 35.728445 500.496449 
 127.185333 35.728445 502.648871 
 127.185444 35.728445 508.163593 
 127.184222 35.728445 473.510999 
 127.184333 35.728445 463.353194 
 127.184444 35.728445 458.435131 
 127.184556 35.728445 457.674420 
 127.184667 35.728445 455.421886 
 127.184778 35.728445 457.676596 
 127.184889 35.728445 472.478969 
 127.185000 35.728445 476.482695 
 127.185111 35.728445 479.859503 
 127.185222 35.728445 500.496449 
 127.185333 35.728445 502.648871 
 127.185444 35.728445 508.163593 
 127.185556 35.728445 512.478719 
 127.184222 35.728556 476.496928 
 127.184333 35.728556 470.051871 
 127.184444 35.728556 467.805203 
 127.184556 35.728556 467.822556 
 127.184667 35.728556 460.187950 
 127.184778 35.728556 465.615235 
 127.184889 35.728556 478.172836 
 127.185000 35.728556 478.353375 
 127.185111 35.728556 485.928331 
 127.185222 35.728556 500.865775 
 127.185333 35.728556 503.631707 
 127.185444 35.728556 512.453311 
 127.185556 35.728556 516.582689 
 127.184222 35.728667 478.185279 
 127.184333 35.728667 476.471181 
 127.184444 35.728667 480.802345 
 127.184556 35.728667 480.681037 
 127.184667 35.728667 472.474246 
 127.184778 35.728667 480.681326 
 127.184889 35.728667 487.568437 
 127.185000 35.728667 485.995802 
 127.185111 35.728667 489.465938 
 127.185222 35.728667 500.857319 
 127.185333 35.728667 504.018324 
 127.185444 35.728667 516.138678 
 127.185556 35.728667 520.545923 
 127.184333 35.728667 476.471181 
 127.184444 35.728667 480.802345 
 127.184556 35.728667 480.681037 
 127.184667 35.728667 472.474246 
 127.184778 35.728667 480.681326 
 127.184889 35.728667 487.568437 
 127.185000 35.728667 485.995802 
 127.185111 35.728667 489.465938 
 127.185222 35.728667 500.857319 
 127.185333 35.728667 504.018324 
 127.185444 35.728667 516.138678 
 127.185556 35.728667 520.545923 
 127.185667 35.728667 524.334374 
 127.184333 35.728778 480.681156 
 127.184444 35.728778 489.410819 
 127.184556 35.728778 489.394746 
 127.184667 35.728778 487.539290 
 127.184778 35.728778 493.931068 
 127.184889 35.728778 496.187250 
 127.185000 35.728778 493.930403 
 127.185111 35.728778 493.929970 
 127.185222 35.728778 500.862722 
 127.185333 35.728778 504.044992 
 127.185444 35.728778 520.511687 
 127.185556 35.728778 520.733253 
 127.185667 35.728778 525.865991 
 127.184333 35.728889 485.183250 
 127.184444 35.728889 493.933841 
 127.184556 35.728889 493.996837 
 127.184667 35.728889 496.413023 
 127.184778 35.728889 500.347613 
 127.184889 35.728889 496.711506 
 127.185000 35.728889 496.394958 
 127.185111 35.728889 496.410237 
 127.185222 35.728889 502.549243 
 127.185333 35.728889 504.189583 
 127.185444 35.728889 520.520650 
 127.185556 35.728889 521.375635 
 127.185667 35.728889 527.420078 
 127.184444 35.728889 493.933841 
 127.184556 35.728889 493.996837 
 127.184667 35.728889 496.413023 
 127.184778 35.728889 500.347613 
 127.184889 35.728889 496.711506 
 127.185000 35.728889 496.394958 
 127.185111 35.728889 496.410237 
 127.185222 35.728889 502.549243 
 127.185333 35.728889 504.189583 
 127.185444 35.728889 520.520650 
 127.185556 35.728889 521.375635 
 127.185667 35.728889 527.420078 
 127.185778 35.728889 538.597515 
 127.184444 35.729000 494.392197 
 127.184556 35.729000 496.416803 
 127.184667 35.729000 500.951704 
 127.184778 35.729000 502.248934 
 127.184889 35.729000 500.872915 
 127.185000 35.729000 500.594727 
 127.185111 35.729000 508.150707 
 127.185222 35.729000 508.222461 
 127.185333 35.729000 508.604468 
 127.185444 35.729000 520.533756 
 127.185556 35.729000 525.043827 
 127.185667 35.729000 532.981062 
 127.185778 35.729000 538.733345 
 127.184444 35.729111 496.200545 
 127.184556 35.729111 500.872600 
 127.184667 35.729111 508.148140 
 127.184778 35.729111 508.145418 
 127.184889 35.729111 504.399878 
 127.185000 35.729111 508.181329 
 127.185111 35.729111 525.058183 
 127.185222 35.729111 520.514880 
 127.185333 35.729111 515.907833 
 127.185444 35.729111 520.953111 
 127.185556 35.729111 525.879044 
 127.185667 35.729111 537.726963 
 127.185778 35.729111 538.750923 
 127.184556 35.729111 500.872600 
 127.184667 35.729111 508.148140 
 127.184778 35.729111 508.145418 
 127.184889 35.729111 504.399878 
 127.185000 35.729111 508.181329 
 127.185111 35.729111 525.058183 
 127.185222 35.729111 520.514880 
 127.185333 35.729111 515.907833 
 127.185444 35.729111 520.953111 
 127.185556 35.729111 525.879044 
 127.185667 35.729111 537.726963 
 127.185778 35.729111 538.750923 
 127.185889 35.729111 542.514208 
 127.184556 35.729222 508.150886 
 127.184667 35.729222 515.901951 
 127.184778 35.729222 515.907862 
 127.184889 35.729222 518.752722 
 127.185000 35.729222 525.868499 
 127.185111 35.729222 529.697259 
 127.185222 35.729222 525.875764 
 127.185333 35.729222 520.615340 
 127.185444 35.729222 525.867496 
 127.185556 35.729222 533.142399 
 127.185667 35.729222 538.742213 
 127.185778 35.729222 546.503415 
 127.185889 35.729222 547.552940 
 127.184556 35.729333 516.676846 
 127.184667 35.729333 525.249980 
 127.184778 35.729333 525.853444 
 127.184889 35.729333 532.559157 
 127.185000 35.729333 533.011854 
 127.185111 35.729333 532.758404 
 127.185222 35.729333 527.372732 
 127.185333 35.729333 525.861061 
 127.185444 35.729333 532.971593 
 127.185556 35.729333 539.149261 
 127.185667 35.729333 547.504249 
 127.185778 35.729333 547.832959 
 127.185889 35.729333 553.630930 
 127.184556 35.729444 525.806467 
 127.184667 35.729444 525.870881 
 127.184778 35.729444 525.987620 
 127.184889 35.729444 533.004015 
 127.185000 35.729444 533.529408 
 127.185111 35.729444 532.958972 
 127.185222 35.729444 532.869435 
 127.185333 35.729444 532.853465 
 127.185444 35.729444 538.734851 
 127.185556 35.729444 547.537518 
 127.185667 35.729444 551.457259 
 127.185778 35.729444 553.646056 
 127.185889 35.729444 554.510879 
 127.184667 35.729444 525.870881 
 127.184778 35.729444 525.987620 
 127.184889 35.729444 533.004015 
 127.185000 35.729444 533.529408 
 127.185111 35.729444 532.958972 
 127.185222 35.729444 532.869435 
 127.185333 35.729444 532.853465 
 127.185444 35.729444 538.734851 
 127.185556 35.729444 547.537518 
 127.185667 35.729444 551.457259 
 127.185778 35.729444 553.646056 
 127.185889 35.729444 554.510879 
 127.186000 35.729444 561.018918 
 127.184667 35.729555 525.883075 
 127.184778 35.729555 526.408745 
 127.184889 35.729555 533.027343 
 127.185000 35.729555 533.464020 
 127.185111 35.729555 532.985938 
 127.185222 35.729555 534.102841 
 127.185333 35.729555 538.733084 
 127.185444 35.729555 546.696874 
 127.185556 35.729555 547.585627 
 127.185667 35.729555 553.638859 
 127.185778 35.729555 554.559720 
 127.185889 35.729555 559.879687 
 127.186000 35.729555 561.112546 
 127.184667 35.729667 525.887970 
 127.184778 35.729667 526.583201 
 127.184889 35.729667 532.991599 
 127.185000 35.729667 533.022771 
 127.185111 35.729667 533.037938 
 127.185222 35.729667 538.737404 
 127.185333 35.729667 544.155490 
 127.185444 35.729667 547.540487 
 127.185556 35.729667 550.186019 
 127.185667 35.729667 553.668015 
 127.185778 35.729667 558.196608 
 127.185889 35.729667 560.906527 
 127.186000 35.729667 561.160499 
 127.184778 35.729667 526.583201 
 127.184889 35.729667 532.991599 
 127.185000 35.729667 533.022771 
 127.185111 35.729667 533.037938 
 127.185222 35.729667 538.737404 
 127.185333 35.729667 544.155490 
 127.185444 35.729667 547.540487 
 127.185556 35.729667 550.186019 
 127.185667 35.729667 553.668015 
 127.185778 35.729667 558.196608 
 127.185889 35.729667 560.906527 
 127.186000 35.729667 561.160499 
 127.186111 35.729667 561.748306 
 127.184778 35.729778 526.507491 
 127.184889 35.729778 532.958994 
 127.185000 35.729778 532.940733 
 127.185111 35.729778 532.996859 
 127.185222 35.729778 539.561184 
 127.185333 35.729778 547.234887 
 127.185444 35.729778 547.545815 
 127.185556 35.729778 553.551578 
 127.185667 35.729778 553.676212 
 127.185778 35.729778 560.100339 
 127.185889 35.729778 560.967923 
 127.186000 35.729778 561.032228 
 127.186111 35.729778 561.202872 
 127.184778 35.729889 526.262184 
 127.184889 35.729889 531.007872 
 127.185000 35.729889 528.814346 
 127.185111 35.729889 532.964189 
 127.185222 35.729889 539.621238 
 127.185333 35.729889 547.138644 
 127.185444 35.729889 547.542881 
 127.185556 35.729889 553.618200 
 127.185667 35.729889 553.644574 
 127.185778 35.729889 559.937290 
 127.185889 35.729889 560.825051 
 127.186000 35.729889 560.950261 
 127.186111 35.729889 561.000862 
 127.184889 35.729889 531.007872 
 127.185000 35.729889 528.814346 
 127.185111 35.729889 532.964189 
 127.185222 35.729889 539.621238 
 127.185333 35.729889 547.138644 
 127.185444 35.729889 547.542881 
 127.185556 35.729889 553.618200 
 127.185667 35.729889 553.644574 
 127.185778 35.729889 559.937290 
 127.185889 35.729889 560.825051 
 127.186000 35.729889 560.950261 
 127.186111 35.729889 561.000862 
 127.186222 35.729889 554.214928 
 127.184889 35.730000 526.238196 
 127.185000 35.730000 526.037874 
 127.185111 35.730000 532.096985 
 127.185222 35.730000 538.750558 
 127.185333 35.730000 544.195948 
 127.185444 35.730000 547.250107 
 127.185556 35.730000 552.604400 
 127.185667 35.730000 552.875766 
 127.185778 35.730000 554.987197 
 127.185889 35.730000 555.514919 
 127.186000 35.730000 553.656515 
 127.186111 35.730000 554.257353 
 127.186222 35.730000 547.460665 
 127.184889 35.730111 525.925037 
 127.185000 35.730111 525.889972 
 127.185111 35.730111 525.970836 
 127.185222 35.730111 537.656308 
 127.185333 35.730111 538.747306 
 127.185444 35.730111 538.749550 
 127.185556 35.730111 547.539855 
 127.185667 35.730111 547.536463 
 127.185778 35.730111 553.616768 
 127.185889 35.730111 553.616690 
 127.186000 35.730111 547.549273 
 127.186111 35.730111 547.554681 
 127.186222 35.730111 532.993528 
 127.185000 35.730111 525.889972 
 127.185111 35.730111 525.970836 
 127.185222 35.730111 537.656308 
 127.185333 35.730111 538.747306 
 127.185444 35.730111 538.749550 
 127.185556 35.730111 547.539855 
 127.185667 35.730111 547.536463 
 127.185778 35.730111 553.616768 
 127.185889 35.730111 553.616690 
 127.186000 35.730111 547.549273 
 127.186111 35.730111 547.554681 
 127.186222 35.730111 532.993528 
 127.186333 35.730111 520.543059 
 127.185000 35.730222 525.868543 
 127.185111 35.730222 525.740720 
 127.185222 35.730222 529.961480 
 127.185333 35.730222 537.662420 
 127.185444 35.730222 538.381516 
 127.185556 35.730222 538.781244 
 127.185667 35.730222 538.957686 
 127.185778 35.730222 547.534358 
 127.185889 35.730222 547.541432 
 127.186000 35.730222 539.403776 
 127.186111 35.730222 538.735297 
 127.186222 35.730222 525.863341 
 127.186333 35.730222 520.501134 
 127.185000 35.730333 525.648013 
 127.185111 35.730333 520.559851 
 127.185222 35.730333 525.798433 
 127.185333 35.730333 532.990874 
 127.185444 35.730333 533.559848 
 127.185556 35.730333 538.674558 
 127.185667 35.730333 538.734190 
 127.185778 35.730333 538.736772 
 127.185889 35.730333 538.741068 
 127.186000 35.730333 538.541684 
 127.186111 35.730333 532.834187 
 127.186222 35.730333 520.593064 
 127.186333 35.730333 520.074639 
 127.185000 35.730444 520.617594 
 127.185111 35.730444 520.475274 
 127.185222 35.730444 520.980726 
 127.185333 35.730444 532.911957 
 127.185444 35.730444 533.009977 
 127.185556 35.730444 533.019307 
 127.185667 35.730444 535.105436 
 127.185778 35.730444 532.972327 
 127.185889 35.730444 532.946484 
 127.186000 35.730444 526.831322 
 127.186111 35.730444 520.546174 
 127.186222 35.730444 518.959612 
 127.186333 35.730444 515.991295 
 127.185111 35.730444 520.475274 
 127.185222 35.730444 520.980726 
 127.185333 35.730444 532.911957 
 127.185444 35.730444 533.009977 
 127.185556 35.730444 533.019307 
 127.185667 35.730444 535.105436 
 127.185778 35.730444 532.972327 
 127.185889 35.730444 532.946484 
 127.186000 35.730444 526.831322 
 127.186111 35.730444 520.546174 
 127.186222 35.730444 518.959612 
 127.186333 35.730444 515.991295 
 127.186444 35.730444 515.904872 
 127.185111 35.730555 520.109841 
 127.185222 35.730555 520.560994 
 127.185333 35.730555 528.093218 
 127.185444 35.730555 532.847369 
 127.185556 35.730555 525.921229 
 127.185667 35.730555 527.322088 
 127.185778 35.730555 520.698662 
 127.185889 35.730555 520.518225 
 127.186000 35.730555 518.911667 
 127.186111 35.730555 512.617603 
 127.186222 35.730555 514.864772 
 127.186333 35.730555 512.464800 
 127.186444 35.730555 512.370908 
 127.185111 35.730667 519.647677 
 127.185222 35.730667 520.523948 
 127.185333 35.730667 525.807647 
 127.185444 35.730667 525.862678 
 127.185556 35.730667 520.623456 
 127.185667 35.730667 520.732698 
 127.185778 35.730667 515.816077 
 127.185889 35.730667 512.512834 
 127.186000 35.730667 512.404970 
 127.186111 35.730667 508.156312 
 127.186222 35.730667 508.150789 
 127.186333 35.730667 504.056865 
 127.186444 35.730667 500.899749 
 127.185222 35.730667 520.523948 
 127.185333 35.730667 525.807647 
 127.185444 35.730667 525.862678 
 127.185556 35.730667 520.623456 
 127.185667 35.730667 520.732698 
 127.185778 35.730667 515.816077 
 127.185889 35.730667 512.512834 
 127.186000 35.730667 512.404970 
 127.186111 35.730667 508.156312 
 127.186222 35.730667 508.150789 
 127.186333 35.730667 504.056865 
 127.186444 35.730667 500.899749 
 127.186556 35.730667 485.971562 
 127.185222 35.730778 517.560189 
 127.185333 35.730778 516.355561 
 127.185444 35.730778 516.525960 
 127.185556 35.730778 516.226296 
 127.185667 35.730778 516.140099 
 127.185778 35.730778 512.444477 
 127.185889 35.730778 508.331143 
 127.186000 35.730778 504.046109 
 127.186111 35.730778 501.224891 
 127.186222 35.730778 496.419065 
 127.186333 35.730778 493.922301 
 127.186444 35.730778 488.909547 
 127.186556 35.730778 479.061837 
 127.185222 35.730889 515.823257 
 127.185333 35.730889 512.555215 
 127.185444 35.730889 512.483887 
 127.185556 35.730889 512.488144 
 127.185667 35.730889 512.456433 
 127.185778 35.730889 508.010063 
 127.185889 35.730889 504.018862 
 127.186000 35.730889 493.308652 
 127.186111 35.730889 489.402704 
 127.186222 35.730889 485.995836 
 127.186333 35.730889 485.157524 
 127.186444 35.730889 480.880947 
 127.186556 35.730889 476.478688 
 127.185333 35.730889 512.555215 
 127.185444 35.730889 512.483887 
 127.185556 35.730889 512.488144 
 127.185667 35.730889 512.456433 
 127.185778 35.730889 508.010063 
 127.185889 35.730889 504.018862 
 127.186000 35.730889 493.308652 
 127.186111 35.730889 489.402704 
 127.186222 35.730889 485.995836 
 127.186333 35.730889 485.157524 
 127.186444 35.730889 480.880947 
 127.186556 35.730889 476.478688 
 127.186667 35.730889 473.560529 
 127.185333 35.731000 512.450786 
 127.185444 35.731000 512.156297 
 127.185556 35.731000 508.012360 
 127.185667 35.731000 504.046322 
 127.185778 35.731000 496.382319 
 127.185889 35.731000 493.891446 
 127.186000 35.731000 485.175571 
 127.186111 35.731000 482.015428 
 127.186222 35.731000 479.864167 
 127.186333 35.731000 479.035953 
 127.186444 35.731000 476.983104 
 127.186556 35.731000 473.561398 
 127.186667 35.731000 473.749588 
 127.185333 35.731111 512.426300 
 127.185444 35.731111 508.199059 
 127.185556 35.731111 500.883553 
 127.185667 35.731111 496.399366 
 127.185778 35.731111 487.726973 
 127.185889 35.731111 485.988867 
 127.186000 35.731111 481.562073 
 127.186111 35.731111 480.680927 
 127.186222 35.731111 474.204683 
 127.186333 35.731111 473.895989 
 127.186444 35.731111 473.895734 
 127.186556 35.731111 473.896468 
 127.186667 35.731111 473.874246 
 127.185444 35.731111 508.199059 
 127.185556 35.731111 500.883553 
 127.185667 35.731111 496.399366 
 127.185778 35.731111 487.726973 
 127.185889 35.731111 485.988867 
 127.186000 35.731111 481.562073 
 127.186111 35.731111 480.680927 
 127.186222 35.731111 474.204683 
 127.186333 35.731111 473.895989 
 127.186444 35.731111 473.895734 
 127.186556 35.731111 473.896468 
 127.186667 35.731111 473.874246 
 127.186778 35.731111 473.518756 
 127.185444 35.731222 508.143481 
 127.185556 35.731222 496.432235 
 127.185667 35.731222 493.931494 
 127.185778 35.731222 485.994566 
 127.185889 35.731222 485.106420 
 127.186000 35.731222 480.679305 
 127.186111 35.731222 479.069718 
 127.186222 35.731222 470.038917 
 127.186333 35.731222 467.556434 
 127.186444 35.731222 469.265520 
 127.186556 35.731222 471.153482 
 127.186667 35.731222 473.877877 
 127.186778 35.731222 473.511125 
 127.185444 35.731333 504.075448 
 127.185556 35.731333 496.140978 
 127.185667 35.731333 489.495401 
 127.185778 35.731333 485.165102 
 127.185889 35.731333 480.686061 
 127.186000 35.731333 476.463661 
 127.186111 35.731333 474.226069 
 127.186222 35.731333 465.652257 
 127.186333 35.731333 464.106391 
 127.186444 35.731333 465.650533 
 127.186556 35.731333 470.051933 
 127.186667 35.731333 472.200102 
 127.186778 35.731333 474.434862 
 127.185556 35.731333 496.140978 
 127.185667 35.731333 489.495401 
 127.185778 35.731333 485.165102 
 127.185889 35.731333 480.686061 
 127.186000 35.731333 476.463661 
 127.186111 35.731333 474.226069 
 127.186222 35.731333 465.652257 
 127.186333 35.731333 464.106391 
 127.186444 35.731333 465.650533 
 127.186556 35.731333 470.051933 
 127.186667 35.731333 472.200102 
 127.186778 35.731333 474.434862 
 127.186889 35.731333 476.857800 
 127.185556 35.731444 493.890548 
 127.185667 35.731444 485.172991 
 127.185778 35.731444 478.195926 
 127.185889 35.731444 474.438663 
 127.186000 35.731444 469.262323 
 127.186111 35.731444 468.839606 
 127.186222 35.731444 461.734377 
 127.186333 35.731444 460.315512 
 127.186444 35.731444 462.254126 
 127.186556 35.731444 468.268611 
 127.186667 35.731444 470.073170 
 127.186778 35.731444 474.203560 
 127.186889 35.731444 478.175280 
 127.185556 35.731555 485.174941 
 127.185667 35.731555 473.860687 
 127.185778 35.731555 469.265829 
 127.185889 35.731555 465.754006 
 127.186000 35.731555 462.250827 
 127.186111 35.731555 462.254590 
 127.186222 35.731555 460.107710 
 127.186333 35.731555 458.428159 
 127.186444 35.731555 460.186210 
 127.186556 35.731555 464.192804 
 127.186667 35.731555 467.558234 
 127.186778 35.731555 474.210497 
 127.186889 35.731555 478.210006 
 127.185556 35.731667 472.468589 
 127.185667 35.731667 465.678366 
 127.185778 35.731667 464.128409 
 127.185889 35.731667 461.369404 
 127.186000 35.731667 460.083774 
 127.186111 35.731667 458.829182 
 127.186222 35.731667 455.235962 
 127.186333 35.731667 455.719992 
 127.186444 35.731667 458.395496 
 127.186556 35.731667 461.377223 
 127.186667 35.731667 465.772792 
 127.186778 35.731667 474.202854 
 127.186889 35.731667 478.315018 
 127.185667 35.731667 465.678366 
 127.185778 35.731667 464.128409 
 127.185889 35.731667 461.369404 
 127.186000 35.731667 460.083774 
 127.186111 35.731667 458.829182 
 127.186222 35.731667 455.235962 
 127.186333 35.731667 455.719992 
 127.186444 35.731667 458.395496 
 127.186556 35.731667 461.377223 
 127.186667 35.731667 465.772792 
 127.186778 35.731667 474.202854 
 127.186889 35.731667 478.315018 
 127.187000 35.731667 479.080394 
 127.185667 35.731778 464.177413 
 127.185778 35.731778 462.254680 
 127.185889 35.731778 458.424803 
 127.186000 35.731778 457.365480 
 127.186111 35.731778 455.272008 
 127.186222 35.731778 451.779832 
 127.186333 35.731778 451.779400 
 127.186444 35.731778 455.236408 
 127.186556 35.731778 460.185378 
 127.186667 35.731778 463.341666 
 127.186778 35.731778 474.438316 
 127.186889 35.731778 478.407697 
 127.187000 35.731778 479.864352 
 127.185667 35.731889 462.309212 
 127.185778 35.731889 461.404378 
 127.185889 35.731889 455.436978 
 127.186000 35.731889 450.860797 
 127.186111 35.731889 451.779524 
 127.186222 35.731889 448.851295 
 127.186333 35.731889 448.826821 
 127.186444 35.731889 453.026672 
 127.186556 35.731889 460.120047 
 127.186667 35.731889 463.528731 
 127.186778 35.731889 473.543647 
 127.186889 35.731889 478.327249 
 127.187000 35.731889 480.842889 
 127.185778 35.731889 461.404378 
 127.185889 35.731889 455.436978 
 127.186000 35.731889 450.860797 
 127.186111 35.731889 451.779524 
 127.186222 35.731889 448.851295 
 127.186333 35.731889 448.826821 
 127.186444 35.731889 453.026672 
 127.186556 35.731889 460.120047 
 127.186667 35.731889 463.528731 
 127.186778 35.731889 473.543647 
 127.186889 35.731889 478.327249 
 127.187000 35.731889 480.842889 
 127.187111 35.731889 486.050559 
 127.185778 35.732000 460.180099 
 127.185889 35.732000 448.546298 
 127.186000 35.732000 446.885678 
 127.186111 35.732000 446.259916 
 127.186222 35.732000 446.275195 
 127.186333 35.732000 446.250600 
 127.186444 35.732000 451.770574 
 127.186556 35.732000 458.426567 
 127.186667 35.732000 463.743416 
 127.186778 35.732000 472.474562 
 127.186889 35.732000 478.172903 
 127.187000 35.732000 481.659474 
 127.187111 35.732000 487.544929 
 127.185778 35.732111 455.234030 
 127.185889 35.732111 444.758287 
 127.186000 35.732111 442.543854 
 127.186111 35.732111 441.163388 
 127.186222 35.732111 442.460351 
 127.186333 35.732111 446.001574 
 127.186444 35.732111 449.426238 
 127.186556 35.732111 455.236582 
 127.186667 35.732111 461.360870 
 127.186778 35.732111 469.266451 
 127.186889 35.732111 474.421594 
 127.187000 35.732111 481.574887 
 127.187111 35.732111 487.508712 
 127.185889 35.732111 444.758287 
 127.186000 35.732111 442.543854 
 127.186111 35.732111 441.163388 
 127.186222 35.732111 442.460351 
 127.186333 35.732111 446.001574 
 127.186444 35.732111 449.426238 
 127.186556 35.732111 455.236582 
 127.186667 35.732111 461.360870 
 127.186778 35.732111 469.266451 
 127.186889 35.732111 474.421594 
 127.187000 35.732111 481.574887 
 127.187111 35.732111 487.508712 
 127.187222 35.732111 487.475425 
 127.185889 35.732222 440.621074 
 127.186000 35.732222 440.061879 
 127.186111 35.732222 437.859324 
 127.186222 35.732222 439.822567 
 127.186333 35.732222 442.561001 
 127.186444 35.732222 446.890276 
 127.186556 35.732222 451.777300 
 127.186667 35.732222 457.495307 
 127.186778 35.732222 462.274582 
 127.186889 35.732222 469.265705 
 127.187000 35.732222 479.859380 
 127.187111 35.732222 485.986214 
 127.187222 35.732222 485.174894 
 127.185889 35.732333 439.845759 
 127.186000 35.732333 439.134679 
 127.186111 35.732333 436.394402 
 127.186222 35.732333 436.380934 
 127.186333 35.732333 440.065071 
 127.186444 35.732333 446.290015 
 127.186556 35.732333 448.069581 
 127.186667 35.732333 453.163324 
 127.186778 35.732333 458.429062 
 127.186889 35.732333 463.317875 
 127.187000 35.732333 473.896410 
 127.187111 35.732333 481.521592 
 127.187222 35.732333 480.680686 
 127.186000 35.732333 439.134679 
 127.186111 35.732333 436.394402 
 127.186222 35.732333 436.380934 
 127.186333 35.732333 440.065071 
 127.186444 35.732333 446.290015 
 127.186556 35.732333 448.069581 
 127.186667 35.732333 453.163324 
 127.186778 35.732333 458.429062 
 127.186889 35.732333 463.317875 
 127.187000 35.732333 473.896410 
 127.187111 35.732333 481.521592 
 127.187222 35.732333 480.680686 
 127.187333 35.732333 481.345918 
 127.186000 35.732444 437.714069 
 127.186111 35.732444 433.461213 
 127.186222 35.732444 431.840429 
 127.186333 35.732444 437.837724 
 127.186444 35.732444 445.666149 
 127.186556 35.732444 448.149541 
 127.186667 35.732444 450.890759 
 127.186778 35.732444 457.494720 
 127.186889 35.732444 462.259937 
 127.187000 35.732444 467.943618 
 127.187111 35.732444 478.175078 
 127.187222 35.732444 479.064583 
 127.187333 35.732444 481.319361 
 127.186000 35.732556 436.885521 
 127.186111 35.732556 431.836012 
 127.186222 35.732556 431.522096 
 127.186333 35.732556 436.594412 
 127.186444 35.732556 444.764581 
 127.186556 35.732556 446.890634 
 127.186667 35.732556 450.873271 
 127.186778 35.732556 455.447554 
 127.186889 35.732556 462.211555 
 127.187000 35.732556 465.669311 
 127.187111 35.732556 474.438599 
 127.187222 35.732556 478.173850 
 127.187333 35.732556 481.324986 
 127.186111 35.732556 431.836012 
 127.186222 35.732556 431.522096 
 127.186333 35.732556 436.594412 
 127.186444 35.732556 444.764581 
 127.186556 35.732556 446.890634 
 127.186667 35.732556 450.873271 
 127.186778 35.732556 455.447554 
 127.186889 35.732556 462.211555 
 127.187000 35.732556 465.669311 
 127.187111 35.732556 474.438599 
 127.187222 35.732556 478.173850 
 127.187333 35.732556 481.324986 
 127.187444 35.732556 481.569528 
 127.186111 35.732667 430.427830 
 127.186222 35.732667 430.444301 
 127.186333 35.732667 436.279805 
 127.186444 35.732667 442.575223 
 127.186556 35.732667 446.884907 
 127.186667 35.732667 451.064171 
 127.186778 35.732667 455.234063 
 127.186889 35.732667 461.493048 
 127.187000 35.732667 463.317138 
 127.187111 35.732667 471.755459 
 127.187222 35.732667 476.481991 
 127.187333 35.732667 480.703670 
 127.187444 35.732667 481.489527 
 127.186111 35.732778 430.263879 
 127.186222 35.732778 431.776340 
 127.186333 35.732778 435.092519 
 127.186444 35.732778 441.037945 
 127.186556 35.732778 446.445907 
 127.186667 35.732778 451.776556 
 127.186778 35.732778 456.622130 
 127.186889 35.732778 461.356887 
 127.187000 35.732778 464.182054 
 127.187111 35.732778 465.671618 
 127.187222 35.732778 470.018439 
 127.187333 35.732778 479.059265 
 127.187444 35.732778 479.072389 
 127.186222 35.732889 431.841490 
 127.186333 35.732889 435.132523 
 127.186444 35.732889 439.779346 
 127.186556 35.732889 446.260484 
 127.186667 35.732889 451.162951 
 127.186778 35.732889 455.323206 
 127.186889 35.732889 458.427238 
 127.187000 35.732889 462.247894 
 127.187111 35.732889 462.251990 
 127.187222 35.732889 463.328183 
 127.187333 35.732889 472.472314 
 127.187444 35.732889 473.764476 
 127.187556 35.732889 479.064901 
 127.186222 35.733000 434.269157 
 127.186333 35.733000 436.019898 
 127.186444 35.733000 437.863198 
 127.186556 35.733000 446.289358 
 127.186667 35.733000 449.629302 
 127.186778 35.733000 450.864552 
 127.186889 35.733000 456.508646 
 127.187000 35.733000 462.135001 
 127.187111 35.733000 461.525440 
 127.187222 35.733000 462.254947 
 127.187333 35.733000 469.738681 
 127.187444 35.733000 471.062600 
 127.187556 35.733000 479.071566 
 127.186222 35.733111 434.306616 
 127.186333 35.733111 436.379781 
 127.186444 35.733111 439.825770 
 127.186556 35.733111 446.250621 
 127.186667 35.733111 448.080901 
 127.186778 35.733111 451.780048 
 127.186889 35.733111 456.623876 
 127.187000 35.733111 462.256933 
 127.187111 35.733111 462.472780 
 127.187222 35.733111 464.164275 
 127.187333 35.733111 470.053922 
 127.187444 35.733111 472.474217 
 127.187556 35.733111 479.859831 
 127.186333 35.733111 436.379781 
 127.186444 35.733111 439.825770 
 127.186556 35.733111 446.250621 
 127.186667 35.733111 448.080901 
 127.186778 35.733111 451.780048 
 127.186889 35.733111 456.623876 
 127.187000 35.733111 462.256933 
 127.187111 35.733111 462.472780 
 127.187222 35.733111 464.164275 
 127.187333 35.733111 470.053922 
 127.187444 35.733111 472.474217 
 127.187556 35.733111 479.859831 
 127.187667 35.733111 480.681632 
 127.186333 35.733222 436.580536 
 127.186444 35.733222 441.130140 
 127.186556 35.733222 446.883075 
 127.186667 35.733222 448.096772 
 127.186778 35.733222 451.777499 
 127.186889 35.733222 456.643224 
 127.187000 35.733222 464.143223 
 127.187111 35.733222 465.663061 
 127.187222 35.733222 469.263069 
 127.187333 35.733222 473.526998 
 127.187444 35.733222 476.463957 
 127.187556 35.733222 480.722612 
 127.187667 35.733222 481.581087 
 127.186333 35.733333 437.097250 
 127.186444 35.733333 442.809162 
 127.186556 35.733333 447.298216 
 127.186667 35.733333 449.632428 
 127.186778 35.733333 452.916777 
 127.186889 35.733333 455.261408 
 127.187000 35.733333 464.059433 
 127.187111 35.733333 469.263641 
 127.187222 35.733333 473.533247 
 127.187333 35.733333 479.859518 
 127.187444 35.733333 480.686046 
 127.187556 35.733333 485.183302 
 127.187667 35.733333 486.550774 
 127.186444 35.733333 442.809162 
 127.186556 35.733333 447.298216 
 127.186667 35.733333 449.632428 
 127.186778 35.733333 452.916777 
 127.186889 35.733333 455.261408 
 127.187000 35.733333 464.059433 
 127.187111 35.733333 469.263641 
 127.187222 35.733333 473.533247 
 127.187333 35.733333 479.859518 
 127.187444 35.733333 480.686046 
 127.187556 35.733333 485.183302 
 127.187667 35.733333 486.550774 
 127.187778 35.733333 489.372604 
 127.186444 35.733444 446.291816 
 127.186556 35.733444 448.874997 
 127.186667 35.733444 451.780027 
 127.186778 35.733444 455.234413 
 127.186889 35.733444 457.670502 
 127.187000 35.733444 463.332392 
 127.187111 35.733444 471.755907 
 127.187222 35.733444 476.487248 
 127.187333 35.733444 481.543716 
 127.187444 35.733444 485.162823 
 127.187556 35.733444 489.352145 
 127.187667 35.733444 493.917860 
 127.187778 35.733444 496.292792 
 127.186444 35.733556 446.785889 
 127.186556 35.733556 448.089782 
 127.186667 35.733556 455.234205 
 127.186778 35.733556 461.902103 
 127.186889 35.733556 461.378850 
 127.187000 35.733556 467.837703 
 127.187111 35.733556 473.896212 
 127.187222 35.733556 478.157202 
 127.187333 35.733556 481.648652 
 127.187444 35.733556 485.909428 
 127.187556 35.733556 493.962488 
 127.187667 35.733556 496.431059 
 127.187778 35.733556 500.910475 
 127.186556 35.733556 448.089782 
 127.186667 35.733556 455.234205 
 127.186778 35.733556 461.902103 
 127.186889 35.733556 461.378850 
 127.187000 35.733556 467.837703 
 127.187111 35.733556 473.896212 
 127.187222 35.733556 478.157202 
 127.187333 35.733556 481.648652 
 127.187444 35.733556 485.909428 
 127.187556 35.733556 493.962488 
 127.187667 35.733556 496.431059 
 127.187778 35.733556 500.910475 
 127.187889 35.733556 508.150316 
 127.186556 35.733667 451.162411 
 127.186667 35.733667 461.378500 
 127.186778 35.733667 468.275122 
 127.186889 35.733667 467.556802 
 127.187000 35.733667 472.033595 
 127.187111 35.733667 474.211700 
 127.187222 35.733667 479.859632 
 127.187333 35.733667 485.148740 
 127.187444 35.733667 486.263158 
 127.187556 35.733667 496.426411 
 127.187667 35.733667 500.906095 
 127.187778 35.733667 504.408540 
 127.187889 35.733667 508.152300 
 127.186556 35.733778 453.023930 
 127.186667 35.733778 465.659965 
 127.186778 35.733778 470.041726 
 127.186889 35.733778 474.438379 
 127.187000 35.733778 476.489833 
 127.187111 35.733778 476.463739 
 127.187222 35.733778 481.567268 
 127.187333 35.733778 485.233118 
 127.187444 35.733778 487.956306 
 127.187556 35.733778 500.666996 
 127.187667 35.733778 504.053474 
 127.187778 35.733778 508.151581 
 127.187889 35.733778 508.152755 
 127.186667 35.733778 465.659965 
 127.186778 35.733778 470.041726 
 127.186889 35.733778 474.438379 
 127.187000 35.733778 476.489833 
 127.187111 35.733778 476.463739 
 127.187222 35.733778 481.567268 
 127.187333 35.733778 485.233118 
 127.187444 35.733778 487.956306 
 127.187556 35.733778 500.666996 
 127.187667 35.733778 504.053474 
 127.187778 35.733778 508.151581 
 127.187889 35.733778 508.152755 
 127.188000 35.733778 508.133052 
 127.186667 35.733889 467.570998 
 127.186778 35.733889 472.647606 
 127.186889 35.733889 480.681575 
 127.187000 35.733889 479.024683 
 127.187111 35.733889 478.174968 
 127.187222 35.733889 485.537945 
 127.187333 35.733889 485.990689 
 127.187444 35.733889 490.741075 
 127.187556 35.733889 500.881363 
 127.187667 35.733889 507.819861 
 127.187778 35.733889 508.168547 
 127.187889 35.733889 508.149693 
 127.188000 35.733889 504.051114 
 127.186667 35.734000 469.927615 
 127.186778 35.734000 478.163882 
 127.186889 35.734000 485.993265 
 127.187000 35.734000 481.343494 
 127.187111 35.734000 480.680986 
 127.187222 35.734000 489.351389 
 127.187333 35.734000 487.772591 
 127.187444 35.734000 494.125921 
 127.187556 35.734000 500.886379 
 127.187667 35.734000 508.075261 
 127.187778 35.734000 508.140067 
 127.187889 35.734000 504.047411 
 127.188000 35.734000 496.419030 
 127.186778 35.734000 478.163882 
 127.186889 35.734000 485.993265 
 127.187000 35.734000 481.343494 
 127.187111 35.734000 480.680986 
 127.187222 35.734000 489.351389 
 127.187333 35.734000 487.772591 
 127.187444 35.734000 494.125921 
 127.187556 35.734000 500.886379 
 127.187667 35.734000 508.075261 
 127.187778 35.734000 508.140067 
 127.187889 35.734000 504.047411 
 127.188000 35.734000 496.419030 
 127.188111 35.734000 480.656590 
 127.186778 35.734111 481.574504 
 127.186889 35.734111 489.389244 
 127.187000 35.734111 486.036523 
 127.187111 35.734111 487.561277 
 127.187222 35.734111 496.362849 
 127.187333 35.734111 493.930635 
 127.187444 35.734111 496.471511 
 127.187556 35.734111 500.931857 
 127.187667 35.734111 504.640981 
 127.187778 35.734111 501.322196 
 127.187889 35.734111 496.419328 
 127.188000 35.734111 485.988403 
 127.188111 35.734111 476.471551 
 127.186778 35.734222 487.478578 
 127.186889 35.734222 493.852766 
 127.187000 35.734222 493.929418 
 127.187111 35.734222 496.425598 
 127.187222 35.734222 500.919894 
 127.187333 35.734222 500.119576 
 127.187444 35.734222 500.898815 
 127.187556 35.734222 503.984221 
 127.187667 35.734222 504.072980 
 127.187778 35.734222 496.419393 
 127.187889 35.734222 493.056113 
 127.188000 35.734222 479.849817 
 127.188111 35.734222 476.451673 
 127.186889 35.734222 493.852766 
 127.187000 35.734222 493.929418 
 127.187111 35.734222 496.425598 
 127.187222 35.734222 500.919894 
 127.187333 35.734222 500.119576 
 127.187444 35.734222 500.898815 
 127.187556 35.734222 503.984221 
 127.187667 35.734222 504.072980 
 127.187778 35.734222 496.419393 
 127.187889 35.734222 493.056113 
 127.188000 35.734222 479.849817 
 127.188111 35.734222 476.451673 
 127.188222 35.734222 471.058263 
 127.186889 35.734333 496.412736 
 127.187000 35.734333 501.177469 
 127.187111 35.734333 504.050804 
 127.187222 35.734333 504.048283 
 127.187333 35.734333 503.989804 
 127.187444 35.734333 504.145577 
 127.187556 35.734333 507.996298 
 127.187667 35.734333 508.139240 
 127.187778 35.734333 494.862658 
 127.187889 35.734333 489.394216 
 127.188000 35.734333 476.466883 
 127.188111 35.734333 474.432114 
 127.188222 35.734333 467.841010 
 127.186889 35.734444 503.989445 
 127.187000 35.734444 508.141428 
 127.187111 35.734444 508.360617 
 127.187222 35.734444 508.073530 
 127.187333 35.734444 507.240324 
 127.187444 35.734444 508.681462 
 127.187556 35.734444 512.408222 
 127.187667 35.734444 512.375897 
 127.187778 35.734444 495.608584 
 127.187889 35.734444 489.396839 
 127.188000 35.734444 476.489545 
 127.188111 35.734444 472.474255 
 127.188222 35.734444 463.318093 
 127.186889 35.734556 508.129093 
 127.187000 35.734556 508.269636 
 127.187111 35.734556 515.874634 
 127.187222 35.734556 512.454720 
 127.187333 35.734556 512.454382 
 127.187444 35.734556 513.257545 
 127.187556 35.734556 515.376618 
 127.187667 35.734556 512.612430 
 127.187778 35.734556 495.357081 
 127.187889 35.734556 489.403176 
 127.188000 35.734556 474.318107 
 127.188111 35.734556 470.038425 
 127.188222 35.734556 462.235457 
 127.187000 35.734556 508.269636 
 127.187111 35.734556 515.874634 
 127.187222 35.734556 512.454720 
 127.187333 35.734556 512.454382 
 127.187444 35.734556 513.257545 
 127.187556 35.734556 515.376618 
 127.187667 35.734556 512.612430 
 127.187778 35.734556 495.357081 
 127.187889 35.734556 489.403176 
 127.188000 35.734556 474.318107 
 127.188111 35.734556 470.038425 
 127.188222 35.734556 462.235457 
 127.188333 35.734556 457.675100 
 127.187000 35.734667 512.386014 
 127.187111 35.734667 520.533524 
 127.187222 35.734667 520.515058 
 127.187333 35.734667 521.187515 
 127.187444 35.734667 515.925790 
 127.187556 35.734667 515.889662 
 127.187667 35.734667 512.468503 
 127.187778 35.734667 493.929267 
 127.187889 35.734667 487.570882 
 127.188000 35.734667 472.452070 
 127.188111 35.734667 467.556595 
 127.188222 35.734667 461.378389 
 127.188333 35.734667 455.640309 
 127.187000 35.734778 513.450595 
 127.187111 35.734778 525.017116 
 127.187222 35.734778 525.868370 
 127.187333 35.734778 528.447110 
 127.187444 35.734778 515.995024 
 127.187556 35.734778 512.738754 
 127.187667 35.734778 507.975272 
 127.187778 35.734778 487.559611 
 127.187889 35.734778 485.173594 
 127.188000 35.734778 469.265516 
 127.188111 35.734778 468.136420 
 127.188222 35.734778 461.376999 
 127.188333 35.734778 451.162877 
 127.187111 35.734778 525.017116 
 127.187222 35.734778 525.868370 
 127.187333 35.734778 528.447110 
 127.187444 35.734778 515.995024 
 127.187556 35.734778 512.738754 
 127.187667 35.734778 507.975272 
 127.187778 35.734778 487.559611 
 127.187889 35.734778 485.173594 
 127.188000 35.734778 469.265516 
 127.188111 35.734778 468.136420 
 127.188222 35.734778 461.376999 
 127.188333 35.734778 451.162877 
 127.188444 35.734778 429.046657 
 127.187111 35.734889 525.860706 
 127.187222 35.734889 527.705671 
 127.187333 35.734889 530.456439 
 127.187444 35.734889 512.455544 
 127.187556 35.734889 507.788232 
 127.187667 35.734889 493.927304 
 127.187778 35.734889 481.607723 
 127.187889 35.734889 480.926413 
 127.188000 35.734889 464.190205 
 127.188111 35.734889 464.162152 
 127.188222 35.734889 460.182390 
 127.188333 35.734889 440.977483 
 127.188444 35.734889 421.783555 
 127.187111 35.735000 525.867842 
 127.187222 35.735000 525.953979 
 127.187333 35.735000 525.130138 
 127.187444 35.735000 500.918300 
 127.187556 35.735000 493.919068 
 127.187667 35.735000 481.575106 
 127.187778 35.735000 479.861968 
 127.187889 35.735000 478.168189 
 127.188000 35.735000 455.388756 
 127.188111 35.735000 457.490849 
 127.188222 35.735000 453.007344 
 127.188333 35.735000 429.046898 
 127.188444 35.735000 419.222461 
 127.187222 35.735000 525.953979 
 127.187333 35.735000 525.130138 
 127.187444 35.735000 500.918300 
 127.187556 35.735000 493.919068 
 127.187667 35.735000 481.575106 
 127.187778 35.735000 479.861968 
 127.187889 35.735000 478.168189 
 127.188000 35.735000 455.388756 
 127.188111 35.735000 457.490849 
 127.188222 35.735000 453.007344 
 127.188333 35.735000 429.046898 
 127.188444 35.735000 419.222461 
 127.188556 35.735000 416.216602 
 127.187222 35.735111 520.514463 
 127.187333 35.735111 513.362877 
 127.187444 35.735111 489.321820 
 127.187556 35.735111 481.582215 
 127.187667 35.735111 478.174469 
 127.187778 35.735111 476.475544 
 127.187889 35.735111 463.798193 
 127.188000 35.735111 446.205871 
 127.188111 35.735111 446.984876 
 127.188222 35.735111 437.087374 
 127.188333 35.735111 420.283342 
 127.188444 35.735111 417.586917 
 127.188556 35.735111 414.109508 
 127.187222 35.735222 512.952667 
 127.187333 35.735222 508.152217 
 127.187444 35.735222 485.162954 
 127.187556 35.735222 479.069740 
 127.187667 35.735222 470.389937 
 127.187778 35.735222 463.317654 
 127.187889 35.735222 444.752654 
 127.188000 35.735222 439.813777 
 127.188111 35.735222 437.849973 
 127.188222 35.735222 420.269101 
 127.188333 35.735222 416.182938 
 127.188444 35.735222 416.953030 
 127.188556 35.735222 407.220221 
 127.187333 35.735222 508.152217 
 127.187444 35.735222 485.162954 
 127.187556 35.735222 479.069740 
 127.187667 35.735222 470.389937 
 127.187778 35.735222 463.317654 
 127.187889 35.735222 444.752654 
 127.188000 35.735222 439.813777 
 127.188111 35.735222 437.849973 
 127.188222 35.735222 420.269101 
 127.188333 35.735222 416.182938 
 127.188444 35.735222 416.953030 
 127.188556 35.735222 407.220221 
 127.188667 35.735222 385.015441 
 127.187333 35.735333 504.067199 
 127.187444 35.735333 480.779106 
 127.187556 35.735333 476.467824 
 127.187667 35.735333 458.430216 
 127.187778 35.735333 448.742791 
 127.187889 35.735333 436.383395 
 127.188000 35.735333 436.067363 
 127.188111 35.735333 427.820056 
 127.188222 35.735333 412.276607 
 127.188333 35.735333 413.401748 
 127.188444 35.735333 414.715111 
 127.188556 35.735333 400.945302 
 127.188667 35.735333 379.583896 
 127.187333 35.735444 500.786143 
 127.187444 35.735444 479.857284 
 127.187556 35.735444 471.152315 
 127.187667 35.735444 446.889378 
 127.187778 35.735444 437.856658 
 127.187889 35.735444 431.886095 
 127.188000 35.735444 431.194232 
 127.188111 35.735444 417.573413 
 127.188222 35.735444 408.683082 
 127.188333 35.735444 409.807655 
 127.188444 35.735444 413.334560 
 127.188556 35.735444 393.141191 
 127.188667 35.735444 376.959672 
 127.187444 35.735444 479.857284 
 127.187556 35.735444 471.152315 
 127.187667 35.735444 446.889378 
 127.187778 35.735444 437.856658 
 127.187889 35.735444 431.886095 
 127.188000 35.735444 431.194232 
 127.188111 35.735444 417.573413 
 127.188222 35.735444 408.683082 
 127.188333 35.735444 409.807655 
 127.188444 35.735444 413.334560 
 127.188556 35.735444 393.141191 
 127.188667 35.735444 376.959672 
 127.188778 35.735444 372.262636 
 127.187444 35.735556 476.489999 
 127.187556 35.735556 462.345604 
 127.187667 35.735556 441.330242 
 127.187778 35.735556 434.383387 
 127.187889 35.735556 430.238038 
 127.188000 35.735556 425.738764 
 127.188111 35.735556 413.028888 
 127.188222 35.735556 407.232611 
 127.188333 35.735556 408.870953 
 127.188444 35.735556 408.701164 
 127.188556 35.735556 391.193203 
 127.188667 35.735556 379.089312 
 127.188778 35.735556 376.894914 
 127.187444 35.735667 467.698138 
 127.187556 35.735667 451.604346 
 127.187667 35.735667 440.064398 
 127.187778 35.735667 430.286202 
 127.187889 35.735667 425.504114 
 127.188000 35.735667 417.587879 
 127.188111 35.735667 410.210314 
 127.188222 35.735667 405.900031 
 127.188333 35.735667 405.643770 
 127.188444 35.735667 405.673415 
 127.188556 35.735667 393.662607 
 127.188667 35.735667 383.271436 
 127.188778 35.735667 380.990850 
 127.187556 35.735667 451.604346 
 127.187667 35.735667 440.064398 
 127.187778 35.735667 430.286202 
 127.187889 35.735667 425.504114 
 127.188000 35.735667 417.587879 
 127.188111 35.735667 410.210314 
 127.188222 35.735667 405.900031 
 127.188333 35.735667 405.643770 
 127.188444 35.735667 405.673415 
 127.188556 35.735667 393.662607 
 127.188667 35.735667 383.271436 
 127.188778 35.735667 380.990850 
 127.188889 35.735667 393.294921 
 127.187556 35.735778 444.859692 
 127.187667 35.735778 439.848214 
 127.187778 35.735778 428.364358 
 127.187889 35.735778 422.456031 
 127.188000 35.735778 414.713149 
 127.188111 35.735778 412.276595 
 127.188222 35.735778 405.643081 
 127.188333 35.735778 403.998653 
 127.188444 35.735778 405.644084 
 127.188556 35.735778 400.232120 
 127.188667 35.735778 388.998111 
 127.188778 35.735778 387.809395 
 127.188889 35.735778 397.716501 
 127.187556 35.735889 441.251108 
 127.187667 35.735889 439.825878 
 127.187778 35.735889 427.740903 
 127.187889 35.735889 423.545831 
 127.188000 35.735889 416.981103 
 127.188111 35.735889 413.868871 
 127.188222 35.735889 405.844995 
 127.188333 35.735889 404.337433 
 127.188444 35.735889 407.230323 
 127.188556 35.735889 403.740335 
 127.188667 35.735889 396.166370 
 127.188778 35.735889 396.102795 
 127.188889 35.735889 398.942870 
 127.187667 35.735889 439.825878 
 127.187778 35.735889 427.740903 
 127.187889 35.735889 423.545831 
 127.188000 35.735889 416.981103 
 127.188111 35.735889 413.868871 
 127.188222 35.735889 405.844995 
 127.188333 35.735889 404.337433 
 127.188444 35.735889 407.230323 
 127.188556 35.735889 403.740335 
 127.188667 35.735889 396.166370 
 127.188778 35.735889 396.102795 
 127.188889 35.735889 398.942870 
 127.189000 35.735889 398.912276 
 127.187667 35.736000 439.839365 
 127.187778 35.736000 430.239135 
 127.187889 35.736000 430.252021 
 127.188000 35.736000 425.678966 
 127.188111 35.736000 420.324429 
 127.188222 35.736000 413.067797 
 127.188333 35.736000 410.651582 
 127.188444 35.736000 413.350396 
 127.188556 35.736000 407.356013 
 127.188667 35.736000 401.828350 
 127.188778 35.736000 399.959012 
 127.188889 35.736000 399.174683 
 127.189000 35.736000 400.601785 
 127.187667 35.736111 440.068430 
 127.187778 35.736111 437.846858 
 127.187889 35.736111 441.322029 
 127.188000 35.736111 439.825134 
 127.188111 35.736111 431.702602 
 127.188222 35.736111 425.735893 
 127.188333 35.736111 420.324376 
 127.188444 35.736111 420.185226 
 127.188556 35.736111 409.971702 
 127.188667 35.736111 404.068625 
 127.188778 35.736111 401.111034 
 127.188889 35.736111 398.954082 
 127.189000 35.736111 396.872678 
 127.187667 35.736222 442.589759 
 127.187778 35.736222 448.357805 
 127.187889 35.736222 451.161247 
 127.188000 35.736222 448.072649 
 127.188111 35.736222 437.848647 
 127.188222 35.736222 434.280472 
 127.188333 35.736222 430.251802 
 127.188444 35.736222 428.903998 
 127.188556 35.736222 413.869928 
 127.188667 35.736222 405.608771 
 127.188778 35.736222 401.931073 
 127.188889 35.736222 399.001455 
 127.189000 35.736222 392.136418 
 127.187778 35.736222 448.357805 
 127.187889 35.736222 451.161247 
 127.188000 35.736222 448.072649 
 127.188111 35.736222 437.848647 
 127.188222 35.736222 434.280472 
 127.188333 35.736222 430.251802 
 127.188444 35.736222 428.903998 
 127.188556 35.736222 413.869928 
 127.188667 35.736222 405.608771 
 127.188778 35.736222 401.931073 
 127.188889 35.736222 399.001455 
 127.189000 35.736222 392.136418 
 127.189111 35.736222 380.989079 
 127.187778 35.736333 451.961409 
 127.187889 35.736333 453.057606 
 127.188000 35.736333 451.743663 
 127.188111 35.736333 440.064510 
 127.188222 35.736333 437.074262 
 127.188333 35.736333 435.375339 
 127.188444 35.736333 430.279326 
 127.188556 35.736333 416.205529 
 127.188667 35.736333 405.643761 
 127.188778 35.736333 402.747671 
 127.188889 35.736333 400.220330 
 127.189000 35.736333 386.788925 
 127.189111 35.736333 379.775456 
 127.187778 35.736444 455.422496 
 127.187889 35.736444 455.424672 
 127.188000 35.736444 453.033067 
 127.188111 35.736444 444.745419 
 127.188222 35.736444 437.858676 
 127.188333 35.736444 436.375748 
 127.188444 35.736444 429.159220 
 127.188556 35.736444 416.195762 
 127.188667 35.736444 405.717592 
 127.188778 35.736444 403.995253 
 127.188889 35.736444 398.955464 
 127.189000 35.736444 385.008975 
 127.189111 35.736444 379.191348 
 127.187889 35.736444 455.424672 
 127.188000 35.736444 453.033067 
 127.188111 35.736444 444.745419 
 127.188222 35.736444 437.858676 
 127.188333 35.736444 436.375748 
 127.188444 35.736444 429.159220 
 127.188556 35.736444 416.195762 
 127.188667 35.736444 405.717592 
 127.188778 35.736444 403.995253 
 127.188889 35.736444 398.955464 
 127.189000 35.736444 385.008975 
 127.189111 35.736444 379.191348 
 127.189222 35.736444 378.823525 
 127.187889 35.736556 456.442462 
 127.188000 35.736556 455.544148 
 127.188111 35.736556 450.044711 
 127.188222 35.736556 439.977413 
 127.188333 35.736556 434.648687 
 127.188444 35.736556 425.257538 
 127.188556 35.736556 414.481175 
 127.188667 35.736556 406.063361 
 127.188778 35.736556 404.336953 
 127.188889 35.736556 398.970413 
 127.189000 35.736556 384.387796 
 127.189111 35.736556 380.969220 
 127.189222 35.736556 380.990737 
 127.187889 35.736667 456.608984 
 127.188000 35.736667 457.670665 
 127.188111 35.736667 455.427169 
 127.188222 35.736667 440.301605 
 127.188333 35.736667 435.629292 
 127.188444 35.736667 421.421433 
 127.188556 35.736667 414.176502 
 127.188667 35.736667 407.313320 
 127.188778 35.736667 405.643758 
 127.188889 35.736667 402.759694 
 127.189000 35.736667 391.184140 
 127.189111 35.736667 387.141608 
 127.189222 35.736667 389.024940 
 127.188000 35.736667 457.670665 
 127.188111 35.736667 455.427169 
 127.188222 35.736667 440.301605 
 127.188333 35.736667 435.629292 
 127.188444 35.736667 421.421433 
 127.188556 35.736667 414.176502 
 127.188667 35.736667 407.313320 
 127.188778 35.736667 405.643758 
 127.188889 35.736667 402.759694 
 127.189000 35.736667 391.184140 
 127.189111 35.736667 387.141608 
 127.189222 35.736667 389.024940 
 127.189333 35.736667 403.995394 
 127.188000 35.736778 458.283638 
 127.188111 35.736778 455.237774 
 127.188222 35.736778 441.165611 
 127.188333 35.736778 437.072096 
 127.188444 35.736778 421.796371 
 127.188556 35.736778 414.715748 
 127.188667 35.736778 410.691041 
 127.188778 35.736778 407.621910 
 127.188889 35.736778 405.643320 
 127.189000 35.736778 400.050063 
 127.189111 35.736778 396.334194 
 127.189222 35.736778 400.601788 
 127.189333 35.736778 409.108040 
 127.188000 35.736889 458.426590 
 127.188111 35.736889 455.746496 
 127.188222 35.736889 442.957449 
 127.188333 35.736889 440.064401 
 127.188444 35.736889 427.758110 
 127.188556 35.736889 419.409785 
 127.188667 35.736889 416.954366 
 127.188778 35.736889 409.807848 
 127.188889 35.736889 407.594808 
 127.189000 35.736889 405.643767 
 127.189111 35.736889 405.668645 
 127.189222 35.736889 408.724930 
 127.189333 35.736889 410.042364 
 127.188111 35.736889 455.746496 
 127.188222 35.736889 442.957449 
 127.188333 35.736889 440.064401 
 127.188444 35.736889 427.758110 
 127.188556 35.736889 419.409785 
 127.188667 35.736889 416.954366 
 127.188778 35.736889 409.807848 
 127.188889 35.736889 407.594808 
 127.189000 35.736889 405.643767 
 127.189111 35.736889 405.668645 
 127.189222 35.736889 408.724930 
 127.189333 35.736889 410.042364 
 127.189444 35.736889 407.974825 
 127.188111 35.737000 455.985308 
 127.188222 35.737000 446.284875 
 127.188333 35.737000 445.918811 
 127.188444 35.737000 439.826112 
 127.188556 35.737000 431.838435 
 127.188667 35.737000 434.438336 
 127.188778 35.737000 421.759901 
 127.188889 35.737000 412.270274 
 127.189000 35.737000 413.082299 
 127.189111 35.737000 414.168631 
 127.189222 35.737000 417.587884 
 127.189333 35.737000 409.807686 
 127.189444 35.737000 410.437471 
 127.188111 35.737111 455.434594 
 127.188222 35.737111 448.872937 
 127.188333 35.737111 449.591818 
 127.188444 35.737111 450.863675 
 127.188556 35.737111 453.008842 
 127.188667 35.737111 448.857977 
 127.188778 35.737111 437.043974 
 127.188889 35.737111 425.872329 
 127.189000 35.737111 427.721075 
 127.189111 35.737111 427.713574 
 127.189222 35.737111 430.249119 
 127.189333 35.737111 413.367580 
 127.189444 35.737111 413.877207 
 127.188222 35.737111 448.872937 
 127.188333 35.737111 449.591818 
 127.188444 35.737111 450.863675 
 127.188556 35.737111 453.008842 
 127.188667 35.737111 448.857977 
 127.188778 35.737111 437.043974 
 127.188889 35.737111 425.872329 
 127.189000 35.737111 427.721075 
 127.189111 35.737111 427.713574 
 127.189222 35.737111 430.249119 
 127.189333 35.737111 413.367580 
 127.189444 35.737111 413.877207 
 127.189556 35.737111 420.324956 
 127.188222 35.737222 455.423029 
 127.188333 35.737222 460.115352 
 127.188444 35.737222 462.209914 
 127.188556 35.737222 463.318042 
 127.188667 35.737222 452.893308 
 127.188778 35.737222 446.883131 
 127.188889 35.737222 448.070716 
 127.189000 35.737222 446.938102 
 127.189111 35.737222 440.120812 
 127.189222 35.737222 442.329082 
 127.189333 35.737222 417.587377 
 127.189444 35.737222 417.587295 
 127.189556 35.737222 422.479440 
 127.188222 35.737333 468.271681 
 127.188333 35.737333 471.754504 
 127.188444 35.737333 467.812827 
 127.188556 35.737333 467.569876 
 127.188667 35.737333 457.489302 
 127.188778 35.737333 455.321746 
 127.188889 35.737333 462.278229 
 127.189000 35.737333 460.556546 
 127.189111 35.737333 451.162587 
 127.189222 35.737333 449.632187 
 127.189333 35.737333 425.889444 
 127.189444 35.737333 422.499950 
 127.189556 35.737333 422.812063 
 127.188333 35.737333 471.754504 
 127.188444 35.737333 467.812827 
 127.188556 35.737333 467.569876 
 127.188667 35.737333 457.489302 
 127.188778 35.737333 455.321746 
 127.188889 35.737333 462.278229 
 127.189000 35.737333 460.556546 
 127.189111 35.737333 451.162587 
 127.189222 35.737333 449.632187 
 127.189333 35.737333 425.889444 
 127.189444 35.737333 422.499950 
 127.189556 35.737333 422.812063 
 127.189667 35.737333 416.728437 
 127.188333 35.737444 477.901346 
 127.188444 35.737444 470.032620 
 127.188556 35.737444 470.052752 
 127.188667 35.737444 463.387086 
 127.188778 35.737444 464.191644 
 127.188889 35.737444 469.057004 
 127.189000 35.737444 463.796429 
 127.189111 35.737444 455.237472 
 127.189222 35.737444 453.008530 
 127.189333 35.737444 436.935841 
 127.189444 35.737444 429.027288 
 127.189556 35.737444 423.545384 
 127.189667 35.737444 416.202889 
 127.188333 35.737556 478.394916 
 127.188444 35.737556 471.752850 
 127.188556 35.737556 473.773239 
 127.188667 35.737556 471.059690 
 127.188778 35.737556 473.591429 
 127.188889 35.737556 471.058272 
 127.189000 35.737556 465.617874 
 127.189111 35.737556 457.674231 
 127.189222 35.737556 455.422875 
 127.189333 35.737556 441.159400 
 127.189444 35.737556 434.479400 
 127.189556 35.737556 423.684532 
 127.189667 35.737556 416.204701 
 127.188444 35.737556 471.752850 
 127.188556 35.737556 473.773239 
 127.188667 35.737556 471.059690 
 127.188778 35.737556 473.591429 
 127.188889 35.737556 471.058272 
 127.189000 35.737556 465.617874 
 127.189111 35.737556 457.674231 
 127.189222 35.737556 455.422875 
 127.189333 35.737556 441.159400 
 127.189444 35.737556 434.479400 
 127.189556 35.737556 423.684532 
 127.189667 35.737556 416.204701 
 127.189778 35.737556 404.337149 
 127.188444 35.737667 472.475015 
 127.188556 35.737667 476.464169 
 127.188667 35.737667 478.188843 
 127.188778 35.737667 478.176043 
 127.188889 35.737667 471.137614 
 127.189000 35.737667 461.372409 
 127.189111 35.737667 455.809503 
 127.189222 35.737667 455.419852 
 127.189333 35.737667 442.559460 
 127.189444 35.737667 438.144983 
 127.189556 35.737667 422.831897 
 127.189667 35.737667 416.985499 
 127.189778 35.737667 403.999742 
 127.188444 35.737778 474.305666 
 127.188556 35.737778 479.065752 
 127.188667 35.737778 479.859801 
 127.188778 35.737778 478.177128 
 127.188889 35.737778 467.557958 
 127.189000 35.737778 453.008536 
 127.189111 35.737778 453.008537 
 127.189222 35.737778 450.860876 
 127.189333 35.737778 441.178061 
 127.189444 35.737778 437.862612 
 127.189556 35.737778 420.321816 
 127.189667 35.737778 414.713170 
 127.189778 35.737778 403.049531 
 127.188556 35.737778 479.065752 
 127.188667 35.737778 479.859801 
 127.188778 35.737778 478.177128 
 127.188889 35.737778 467.557958 
 127.189000 35.737778 453.008536 
 127.189111 35.737778 453.008537 
 127.189222 35.737778 450.860876 
 127.189333 35.737778 441.178061 
 127.189444 35.737778 437.862612 
 127.189556 35.737778 420.321816 
 127.189667 35.737778 414.713170 
 127.189778 35.737778 403.049531 
 127.189889 35.737778 401.827012 
 127.188556 35.737889 479.860750 
 127.188667 35.737889 479.860267 
 127.188778 35.737889 474.202118 
 127.188889 35.737889 460.188598 
 127.189000 35.737889 448.842465 
 127.189111 35.737889 446.272528 
 127.189222 35.737889 445.848979 
 127.189333 35.737889 436.385888 
 127.189444 35.737889 430.341967 
 127.189556 35.737889 412.268136 
 127.189667 35.737889 409.108518 
 127.189778 35.737889 400.793033 
 127.189889 35.737889 396.387731 
 127.188556 35.738000 479.991701 
 127.188667 35.738000 479.040738 
 127.188778 35.738000 467.739983 
 127.188889 35.738000 452.422163 
 127.189000 35.738000 446.291836 
 127.189111 35.738000 432.985501 
 127.189222 35.738000 430.191439 
 127.189333 35.738000 420.183301 
 127.189444 35.738000 416.204076 
 127.189556 35.738000 397.647661 
 127.189667 35.738000 394.734750 
 127.189778 35.738000 393.127345 
 127.189889 35.738000 387.381715 
 127.188667 35.738111 473.515209 
 127.188778 35.738111 457.476923 
 127.188889 35.738111 448.071324 
 127.189000 35.738111 442.740545 
 127.189111 35.738111 427.733729 
 127.189222 35.738111 422.512652 
 127.189333 35.738111 413.121655 
 127.189444 35.738111 407.315095 
 127.189556 35.738111 393.145677 
 127.189667 35.738111 389.049980 
 127.189778 35.738111 384.372812 
 127.189889 35.738111 383.287839 
 127.190000 35.738111 385.015226 
 127.188667 35.738222 463.334285 
 127.188778 35.738222 449.633230 
 127.188889 35.738222 447.351947 
 127.189000 35.738222 442.559217 
 127.189111 35.738222 425.741396 
 127.189222 35.738222 422.803737 
 127.189333 35.738222 413.076661 
 127.189444 35.738222 409.040092 
 127.189556 35.738222 399.042967 
 127.189667 35.738222 392.169706 
 127.189778 35.738222 383.355329 
 127.189889 35.738222 382.023804 
 127.190000 35.738222 384.660861 
 127.188667 35.738333 455.422439 
 127.188778 35.738333 448.861291 
 127.188889 35.738333 448.873148 
 127.189000 35.738333 446.885441 
 127.189111 35.738333 429.046933 
 127.189222 35.738333 427.735277 
 127.189333 35.738333 414.713148 
 127.189444 35.738333 409.707658 
 127.189556 35.738333 407.607611 
 127.189667 35.738333 400.960780 
 127.189778 35.738333 385.012800 
 127.189889 35.738333 383.425804 
 127.190000 35.738333 386.800751 
 127.188778 35.738333 448.861291 
 127.188889 35.738333 448.873148 
 127.189000 35.738333 446.885441 
 127.189111 35.738333 429.046933 
 127.189222 35.738333 427.735277 
 127.189333 35.738333 414.713148 
 127.189444 35.738333 409.707658 
 127.189556 35.738333 407.607611 
 127.189667 35.738333 400.960780 
 127.189778 35.738333 385.012800 
 127.189889 35.738333 383.425804 
 127.190000 35.738333 386.800751 
 127.190111 35.738333 387.381976 
 127.188778 35.738444 447.572596 
 127.188889 35.738444 450.773744 
 127.189000 35.738444 455.301500 
 127.189111 35.738444 437.719894 
 127.189222 35.738444 431.837602 
 127.189333 35.738444 420.188713 
 127.189444 35.738444 413.621789 
 127.189556 35.738444 413.856025 
 127.189667 35.738444 409.272213 
 127.189778 35.738444 392.053027 
 127.189889 35.738444 391.209614 
 127.190000 35.738444 391.304862 
 127.190111 35.738444 387.665254 
 127.188778 35.738556 448.878762 
 127.188889 35.738556 455.572799 
 127.189000 35.738556 464.135604 
 127.189111 35.738556 448.109009 
 127.189222 35.738556 437.782625 
 127.189333 35.738556 430.229170 
 127.189444 35.738556 425.706927 
 127.189556 35.738556 420.300690 
 127.189667 35.738556 416.786893 
 127.189778 35.738556 414.713548 
 127.189889 35.738556 410.166758 
 127.190000 35.738556 400.224369 
 127.190111 35.738556 390.923810 
 127.188889 35.738556 455.572799 
 127.189000 35.738556 464.135604 
 127.189111 35.738556 448.109009 
 127.189222 35.738556 437.782625 
 127.189333 35.738556 430.229170 
 127.189444 35.738556 425.706927 
 127.189556 35.738556 420.300690 
 127.189667 35.738556 416.786893 
 127.189778 35.738556 414.713548 
 127.189889 35.738556 410.166758 
 127.190000 35.738556 400.224369 
 127.190111 35.738556 390.923810 
 127.190222 35.738556 390.423613 
 127.188889 35.738667 460.183009 
 127.189000 35.738667 468.273403 
 127.189111 35.738667 461.405577 
 127.189222 35.738667 448.854558 
 127.189333 35.738667 446.250888 
 127.189444 35.738667 446.255312 
 127.189556 35.738667 434.281239 
 127.189667 35.738667 431.705734 
 127.189778 35.738667 430.248607 
 127.189889 35.738667 422.305374 
 127.190000 35.738667 410.748989 
 127.190111 35.738667 394.733200 
 127.190222 35.738667 393.142048 
 127.188889 35.738778 464.159283 
 127.189000 35.738778 469.265920 
 127.189111 35.738778 473.511391 
 127.189222 35.738778 468.275491 
 127.189333 35.738778 463.324359 
 127.189444 35.738778 460.118116 
 127.189556 35.738778 448.071185 
 127.189667 35.738778 445.010175 
 127.189778 35.738778 434.504794 
 127.189889 35.738778 427.725320 
 127.190000 35.738778 416.210055 
 127.190111 35.738778 404.015193 
 127.190222 35.738778 396.222178 
 127.189000 35.738778 469.265920 
 127.189111 35.738778 473.511391 
 127.189222 35.738778 468.275491 
 127.189333 35.738778 463.324359 
 127.189444 35.738778 460.118116 
 127.189556 35.738778 448.071185 
 127.189667 35.738778 445.010175 
 127.189778 35.738778 434.504794 
 127.189889 35.738778 427.725320 
 127.190000 35.738778 416.210055 
 127.190111 35.738778 404.015193 
 127.190222 35.738778 396.222178 
 127.190333 35.738778 394.754629 
 127.189000 35.738889 472.474011 
 127.189111 35.738889 484.294141 
 127.189222 35.738889 481.084873 
 127.189333 35.738889 473.874255 
 127.189444 35.738889 463.316741 
 127.189556 35.738889 457.143939 
 127.189667 35.738889 448.136100 
 127.189778 35.738889 436.662096 
 127.189889 35.738889 427.789871 
 127.190000 35.738889 419.408859 
 127.190111 35.738889 409.807934 
 127.190222 35.738889 399.441995 
 127.190333 35.738889 395.641782 
 127.189000 35.739000 478.179527 
 127.189111 35.739000 487.648772 
 127.189222 35.739000 486.085898 
 127.189333 35.739000 476.488621 
 127.189444 35.739000 467.556544 
 127.189556 35.739000 460.183913 
 127.189667 35.739000 451.163717 
 127.189778 35.739000 437.168742 
 127.189889 35.739000 429.046870 
 127.190000 35.739000 419.418704 
 127.190111 35.739000 413.867916 
 127.190222 35.739000 400.585133 
 127.190333 35.739000 396.188374 
 127.189111 35.739000 487.648772 
 127.189222 35.739000 486.085898 
 127.189333 35.739000 476.488621 
 127.189444 35.739000 467.556544 
 127.189556 35.739000 460.183913 
 127.189667 35.739000 451.163717 
 127.189778 35.739000 437.168742 
 127.189889 35.739000 429.046870 
 127.190000 35.739000 419.418704 
 127.190111 35.739000 413.867916 
 127.190222 35.739000 400.585133 
 127.190333 35.739000 396.188374 
 127.190444 35.739000 397.716300 
 127.189111 35.739111 489.418205 
 127.189222 35.739111 487.558958 
 127.189333 35.739111 476.463759 
 127.189444 35.739111 470.145614 
 127.189556 35.739111 461.343739 
 127.189667 35.739111 453.008537 
 127.189778 35.739111 439.827542 
 127.189889 35.739111 431.838709 
 127.190000 35.739111 420.325120 
 127.190111 35.739111 414.218326 
 127.190222 35.739111 400.942175 
 127.190333 35.739111 396.160428 
 127.190444 35.739111 400.408478 
 127.189111 35.739222 490.019485 
 127.189222 35.739222 487.562609 
 127.189333 35.739222 479.066754 
 127.189444 35.739222 473.511879 
 127.189556 35.739222 461.268580 
 127.189667 35.739222 455.422931 
 127.189778 35.739222 440.072932 
 127.189889 35.739222 437.070770 
 127.190000 35.739222 423.544353 
 127.190111 35.739222 417.532749 
 127.190222 35.739222 405.643735 
 127.190333 35.739222 399.146263 
 127.190444 35.739222 400.945630 
 127.189222 35.739222 487.562609 
 127.189333 35.739222 479.066754 
 127.189444 35.739222 473.511879 
 127.189556 35.739222 461.268580 
 127.189667 35.739222 455.422931 
 127.189778 35.739222 440.072932 
 127.189889 35.739222 437.070770 
 127.190000 35.739222 423.544353 
 127.190111 35.739222 417.532749 
 127.190222 35.739222 405.643735 
 127.190333 35.739222 399.146263 
 127.190444 35.739222 400.945630 
 127.190556 35.739222 401.969248 
 127.189222 35.739333 487.557675 
 127.189333 35.739333 481.566961 
 127.189444 35.739333 478.475209 
 127.189556 35.739333 462.173215 
 127.189667 35.739333 455.305193 
 127.189778 35.739333 441.180560 
 127.189889 35.739333 439.823140 
 127.190000 35.739333 431.833126 
 127.190111 35.739333 422.500142 
 127.190222 35.739333 414.169623 
 127.190333 35.739333 401.974111 
 127.190444 35.739333 401.856442 
 127.190556 35.739333 402.282848 
 127.189222 35.739445 487.434416 
 127.189333 35.739445 485.752819 
 127.189444 35.739445 481.359702 
 127.189556 35.739445 464.788428 
 127.189667 35.739445 460.119854 
 127.189778 35.739445 446.291235 
 127.189889 35.739445 441.154817 
 127.190000 35.739445 437.823489 
 127.190111 35.739445 427.224293 
 127.190222 35.739445 422.497193 
 127.190333 35.739445 410.728223 
 127.190444 35.739445 402.756379 
 127.190556 35.739445 403.738587 
 127.189333 35.739445 485.752819 
 127.189444 35.739445 481.359702 
 127.189556 35.739445 464.788428 
 127.189667 35.739445 460.119854 
 127.189778 35.739445 446.291235 
 127.189889 35.739445 441.154817 
 127.190000 35.739445 437.823489 
 127.190111 35.739445 427.224293 
 127.190222 35.739445 422.497193 
 127.190333 35.739445 410.728223 
 127.190444 35.739445 402.756379 
 127.190556 35.739445 403.738587 
 127.190667 35.739445 407.623331 
 127.189333 35.739556 485.994787 
 127.189444 35.739556 485.159714 
 127.189556 35.739556 470.051330 
 127.189667 35.739556 465.673920 
 127.189778 35.739556 451.683937 
 127.189889 35.739556 443.828041 
 127.190000 35.739556 440.064392 
 127.190111 35.739556 429.040720 
 127.190222 35.739556 427.734928 
 127.190333 35.739556 419.375886 
 127.190444 35.739556 405.643761 
 127.190556 35.739556 405.643761 
 127.190667 35.739556 407.230104 
 127.189333 35.739667 486.028082 
 127.189444 35.739667 485.189230 
 127.189556 35.739667 476.483516 
 127.189667 35.739667 472.728022 
 127.189778 35.739667 462.519796 
 127.189889 35.739667 446.251113 
 127.190000 35.739667 442.545107 
 127.190111 35.739667 431.826932 
 127.190222 35.739667 430.257611 
 127.190333 35.739667 427.991564 
 127.190444 35.739667 413.080354 
 127.190556 35.739667 410.564554 
 127.190667 35.739667 409.103822 
 127.189444 35.739667 485.189230 
 127.189556 35.739667 476.483516 
 127.189667 35.739667 472.728022 
 127.189778 35.739667 462.519796 
 127.189889 35.739667 446.251113 
 127.190000 35.739667 442.545107 
 127.190111 35.739667 431.826932 
 127.190222 35.739667 430.257611 
 127.190333 35.739667 427.991564 
 127.190444 35.739667 413.080354 
 127.190556 35.739667 410.564554 
 127.190667 35.739667 409.103822 
 127.190778 35.739667 408.701948 
 127.189444 35.739778 485.175019 
 127.189556 35.739778 478.183238 
 127.189667 35.739778 476.464268 
 127.189778 35.739778 470.085961 
 127.189889 35.739778 451.123679 
 127.190000 35.739778 446.887411 
 127.190111 35.739778 440.064909 
 127.190222 35.739778 434.367681 
 127.190333 35.739778 431.842651 
 127.190444 35.739778 422.466174 
 127.190556 35.739778 414.713885 
 127.190667 35.739778 410.761893 
 127.190778 35.739778 409.301728 
 127.189444 35.739889 482.115829 
 127.189556 35.739889 478.811064 
 127.189667 35.739889 478.184751 
 127.189778 35.739889 476.463683 
 127.189889 35.739889 460.425764 
 127.190000 35.739889 455.291652 
 127.190111 35.739889 451.163057 
 127.190222 35.739889 439.824906 
 127.190333 35.739889 436.996270 
 127.190444 35.739889 429.046757 
 127.190556 35.739889 421.783658 
 127.190667 35.739889 412.275111 
 127.190778 35.739889 413.089604 
 127.189556 35.739889 478.811064 
 127.189667 35.739889 478.184751 
 127.189778 35.739889 476.463683 
 127.189889 35.739889 460.425764 
 127.190000 35.739889 455.291652 
 127.190111 35.739889 451.163057 
 127.190222 35.739889 439.824906 
 127.190333 35.739889 436.996270 
 127.190444 35.739889 429.046757 
 127.190556 35.739889 421.783658 
 127.190667 35.739889 412.275111 
 127.190778 35.739889 413.089604 
 127.190889 35.739889 414.728023 
 127.189556 35.740000 478.571581 
 127.189667 35.740000 479.072636 
 127.189778 35.740000 480.685231 
 127.189889 35.740000 473.512940 
 127.190000 35.740000 460.183706 
 127.190111 35.740000 457.563323 
 127.190222 35.740000 448.874073 
 127.190333 35.740000 442.543522 
 127.190444 35.740000 431.833985 
 127.190556 35.740000 427.735194 
 127.190667 35.740000 417.606933 
 127.190778 35.740000 416.754831 
 127.190889 35.740000 416.951138 
 127.189556 35.740111 478.955731 
 127.189667 35.740111 480.634469 
 127.189778 35.740111 485.327856 
 127.189889 35.740111 482.001822 
 127.190000 35.740111 466.554350 
 127.190111 35.740111 462.224732 
 127.190222 35.740111 459.519243 
 127.190333 35.740111 453.005564 
 127.190444 35.740111 437.259701 
 127.190556 35.740111 434.289920 
 127.190667 35.740111 431.838020 
 127.190778 35.740111 425.741278 
 127.190889 35.740111 416.601009 
 127.189667 35.740111 480.634469 
 127.189778 35.740111 485.327856 
 127.189889 35.740111 482.001822 
 127.190000 35.740111 466.554350 
 127.190111 35.740111 462.224732 
 127.190222 35.740111 459.519243 
 127.190333 35.740111 453.005564 
 127.190444 35.740111 437.259701 
 127.190556 35.740111 434.289920 
 127.190667 35.740111 431.838020 
 127.190778 35.740111 425.741278 
 127.190889 35.740111 416.601009 
 127.191000 35.740111 420.256642 
 127.189667 35.740222 481.578089 
 127.189778 35.740222 487.558871 
 127.189889 35.740222 487.562138 
 127.190000 35.740222 478.174366 
 127.190111 35.740222 471.058233 
 127.190222 35.740222 465.543556 
 127.190333 35.740222 462.363034 
 127.190444 35.740222 451.163639 
 127.190556 35.740222 448.071851 
 127.190667 35.740222 446.291233 
 127.190778 35.740222 431.837806 
 127.190889 35.740222 420.300452 
 127.191000 35.740222 423.625866 
 127.189667 35.740333 485.977425 
 127.189778 35.740333 488.659316 
 127.189889 35.740333 489.394385 
 127.190000 35.740333 489.399472 
 127.190111 35.740333 485.986913 
 127.190222 35.740333 469.434311 
 127.190333 35.740333 469.948302 
 127.190444 35.740333 469.267880 
 127.190556 35.740333 465.647906 
 127.190667 35.740333 450.862519 
 127.190778 35.740333 437.852304 
 127.190889 35.740333 422.842084 
 127.191000 35.740333 429.941272 
 127.189778 35.740333 488.659316 
 127.189889 35.740333 489.394385 
 127.190000 35.740333 489.399472 
 127.190111 35.740333 485.986913 
 127.190222 35.740333 469.434311 
 127.190333 35.740333 469.948302 
 127.190444 35.740333 469.267880 
 127.190556 35.740333 465.647906 
 127.190667 35.740333 450.862519 
 127.190778 35.740333 437.852304 
 127.190889 35.740333 422.842084 
 127.191000 35.740333 429.941272 
 127.191111 35.740333 439.830547 
 127.189778 35.740445 489.386618 
 127.189889 35.740445 490.079465 
 127.190000 35.740445 496.422092 
 127.190111 35.740445 494.270105 
 127.190222 35.740445 478.439180 
 127.190333 35.740445 480.842075 
 127.190444 35.740445 480.775620 
 127.190556 35.740445 473.797595 
 127.190667 35.740445 455.238182 
 127.190778 35.740445 442.856438 
 127.190889 35.740445 429.042409 
 127.191000 35.740445 436.041020 
 127.191111 35.740445 440.133981 
 127.189778 35.740556 489.395850 
 127.189889 35.740556 493.910233 
 127.190000 35.740556 500.740067 
 127.190111 35.740556 500.673601 
 127.190222 35.740556 493.932376 
 127.190333 35.740556 500.879633 
 127.190444 35.740556 489.347141 
 127.190556 35.740556 478.178876 
 127.190667 35.740556 460.184052 
 127.190778 35.740556 449.492359 
 127.190889 35.740556 437.107873 
 127.191000 35.740556 439.828109 
 127.191111 35.740556 441.159188 
 127.189889 35.740556 493.910233 
 127.190000 35.740556 500.740067 
 127.190111 35.740556 500.673601 
 127.190222 35.740556 493.932376 
 127.190333 35.740556 500.879633 
 127.190444 35.740556 489.347141 
 127.190556 35.740556 478.178876 
 127.190667 35.740556 460.184052 
 127.190778 35.740556 449.492359 
 127.190889 35.740556 437.107873 
 127.191000 35.740556 439.828109 
 127.191111 35.740556 441.159188 
 127.191222 35.740556 440.063598 
 127.189889 35.740667 494.073004 
 127.190000 35.740667 500.881821 
 127.190111 35.740667 503.123010 
 127.190222 35.740667 511.973555 
 127.190333 35.740667 515.861542 
 127.190444 35.740667 500.873164 
 127.190556 35.740667 484.929702 
 127.190667 35.740667 469.225348 
 127.190778 35.740667 460.236209 
 127.190889 35.740667 452.996426 
 127.191000 35.740667 445.104061 
 127.191111 35.740667 442.559704 
 127.191222 35.740667 437.855592 
 127.189889 35.740778 496.472086 
 127.190000 35.740778 500.900308 
 127.190111 35.740778 504.049053 
 127.190222 35.740778 516.165996 
 127.190333 35.740778 520.743011 
 127.190444 35.740778 511.978585 
 127.190556 35.740778 496.155746 
 127.190667 35.740778 485.986799 
 127.190778 35.740778 474.437609 
 127.190889 35.740778 467.824385 
 127.191000 35.740778 452.827082 
 127.191111 35.740778 446.293606 
 127.191222 35.740778 437.072856 
 127.189889 35.740889 500.880072 
 127.190000 35.740889 500.953196 
 127.190111 35.740889 504.049317 
 127.190222 35.740889 516.116275 
 127.190333 35.740889 521.146176 
 127.190444 35.740889 515.903172 
 127.190556 35.740889 507.965802 
 127.190667 35.740889 497.636461 
 127.190778 35.740889 481.562978 
 127.190889 35.740889 474.438444 
 127.191000 35.740889 461.376505 
 127.191111 35.740889 450.860724 
 127.191222 35.740889 437.834932 
 127.190000 35.740889 500.953196 
 127.190111 35.740889 504.049317 
 127.190222 35.740889 516.116275 
 127.190333 35.740889 521.146176 
 127.190444 35.740889 515.903172 
 127.190556 35.740889 507.965802 
 127.190667 35.740889 497.636461 
 127.190778 35.740889 481.562978 
 127.190889 35.740889 474.438444 
 127.191000 35.740889 461.376505 
 127.191111 35.740889 450.860724 
 127.191222 35.740889 437.834932 
 127.191333 35.740889 431.837709 
 127.190000 35.741000 500.981173 
 127.190111 35.741000 504.045446 
 127.190222 35.741000 515.523977 
 127.190333 35.741000 520.182995 
 127.190444 35.741000 515.896122 
 127.190556 35.741000 508.330281 
 127.190667 35.741000 503.569279 
 127.190778 35.741000 485.177354 
 127.190889 35.741000 476.465447 
 127.191000 35.741000 463.316939 
 127.191111 35.741000 457.507681 
 127.191222 35.741000 442.554063 
 127.191333 35.741000 436.316445 
 127.190000 35.741111 500.992978 
 127.190111 35.741111 504.039931 
 127.190222 35.741111 512.444199 
 127.190333 35.741111 514.616423 
 127.190444 35.741111 512.466356 
 127.190556 35.741111 508.790741 
 127.190667 35.741111 504.047445 
 127.190778 35.741111 485.984672 
 127.190889 35.741111 476.464139 
 127.191000 35.741111 465.662393 
 127.191111 35.741111 460.121059 
 127.191222 35.741111 451.162831 
 127.191333 35.741111 441.324168 
 127.190111 35.741111 504.039931 
 127.190222 35.741111 512.444199 
 127.190333 35.741111 514.616423 
 127.190444 35.741111 512.466356 
 127.190556 35.741111 508.790741 
 127.190667 35.741111 504.047445 
 127.190778 35.741111 485.984672 
 127.190889 35.741111 476.464139 
 127.191000 35.741111 465.662393 
 127.191111 35.741111 460.121059 
 127.191222 35.741111 451.162831 
 127.191333 35.741111 441.324168 
 127.191444 35.741111 436.393369 
 127.190111 35.741222 504.045195 
 127.190222 35.741222 508.343852 
 127.190333 35.741222 512.201704 
 127.190444 35.741222 511.953255 
 127.190556 35.741222 509.234001 
 127.190667 35.741222 504.158985 
 127.190778 35.741222 487.562980 
 127.190889 35.741222 478.821637 
 127.191000 35.741222 467.970682 
 127.191111 35.741222 462.142219 
 127.191222 35.741222 458.546380 
 127.191333 35.741222 451.164048 
 127.191444 35.741222 444.782681 
 127.190111 35.741333 504.053817 
 127.190222 35.741333 508.154597 
 127.190333 35.741333 508.234320 
 127.190444 35.741333 509.160248 
 127.190556 35.741333 512.150294 
 127.190667 35.741333 508.152516 
 127.190778 35.741333 494.191545 
 127.190889 35.741333 485.174700 
 127.191000 35.741333 473.914663 
 127.191111 35.741333 468.219553 
 127.191222 35.741333 463.843243 
 127.191333 35.741333 458.423991 
 127.191444 35.741333 453.220223 
 127.190222 35.741333 508.154597 
 127.190333 35.741333 508.234320 
 127.190444 35.741333 509.160248 
 127.190556 35.741333 512.150294 
 127.190667 35.741333 508.152516 
 127.190778 35.741333 494.191545 
 127.190889 35.741333 485.174700 
 127.191000 35.741333 473.914663 
 127.191111 35.741333 468.219553 
 127.191222 35.741333 463.843243 
 127.191333 35.741333 458.423991 
 127.191444 35.741333 453.220223 
 127.191556 35.741333 446.250770 
 127.190222 35.741445 508.152490 
 127.190333 35.741445 508.174892 
 127.190444 35.741445 511.327787 
 127.190556 35.741445 512.459616 
 127.190667 35.741445 513.028973 
 127.190778 35.741445 508.149652 
 127.190889 35.741445 496.424082 
 127.191000 35.741445 487.623638 
 127.191111 35.741445 477.601442 
 127.191222 35.741445 469.265631 
 127.191333 35.741445 461.490102 
 127.191444 35.741445 457.673348 
 127.191556 35.741445 446.262433 
 127.190222 35.741556 508.153405 
 127.190333 35.741556 508.338158 
 127.190444 35.741556 512.443565 
 127.190556 35.741556 514.596945 
 127.190667 35.741556 516.418876 
 127.190778 35.741556 515.809576 
 127.190889 35.741556 507.818271 
 127.191000 35.741556 500.711801 
 127.191111 35.741556 484.971287 
 127.191222 35.741556 474.270933 
 127.191333 35.741556 463.952682 
 127.191444 35.741556 458.386384 
 127.191556 35.741556 446.268225 
 127.190333 35.741556 508.338158 
 127.190444 35.741556 512.443565 
 127.190556 35.741556 514.596945 
 127.190667 35.741556 516.418876 
 127.190778 35.741556 515.809576 
 127.190889 35.741556 507.818271 
 127.191000 35.741556 500.711801 
 127.191111 35.741556 484.971287 
 127.191222 35.741556 474.270933 
 127.191333 35.741556 463.952682 
 127.191444 35.741556 458.386384 
 127.191556 35.741556 446.268225 
 127.191667 35.741556 443.502704 
 127.190333 35.741667 511.626954 
 127.190444 35.741667 512.458530 
 127.190556 35.741667 515.747347 
 127.190667 35.741667 520.045174 
 127.190778 35.741667 516.379579 
 127.190889 35.741667 508.296562 
 127.191000 35.741667 504.002001 
 127.191111 35.741667 485.991928 
 127.191222 35.741667 479.109227 
 127.191333 35.741667 465.657304 
 127.191444 35.741667 460.120545 
 127.191556 35.741667 447.225135 
 127.191667 35.741667 446.885495 
 127.190333 35.741778 512.449095 
 127.190444 35.741778 512.512411 
 127.190556 35.741778 515.797523 
 127.190667 35.741778 520.323956 
 127.190778 35.741778 519.512459 
 127.190889 35.741778 512.239746 
 127.191000 35.741778 504.075031 
 127.191111 35.741778 488.210315 
 127.191222 35.741778 485.134327 
 127.191333 35.741778 471.754552 
 127.191444 35.741778 463.899973 
 127.191556 35.741778 456.643157 
 127.191667 35.741778 457.488974 
 127.190444 35.741778 512.512411 
 127.190556 35.741778 515.797523 
 127.190667 35.741778 520.323956 
 127.190778 35.741778 519.512459 
 127.190889 35.741778 512.239746 
 127.191000 35.741778 504.075031 
 127.191111 35.741778 488.210315 
 127.191222 35.741778 485.134327 
 127.191333 35.741778 471.754552 
 127.191444 35.741778 463.899973 
 127.191556 35.741778 456.643157 
 127.191667 35.741778 457.488974 
 127.191778 35.741778 472.473079 
 127.190444 35.741889 512.642717 
 127.190556 35.741889 515.795742 
 127.190667 35.741889 520.439691 
 127.190778 35.741889 520.499540 
 127.190889 35.741889 512.472308 
 127.191000 35.741889 508.079846 
 127.191111 35.741889 494.019130 
 127.191222 35.741889 493.930154 
 127.191333 35.741889 485.156144 
 127.191444 35.741889 476.490302 
 127.191556 35.741889 469.266502 
 127.191667 35.741889 469.266022 
 127.191778 35.741889 478.564978 
 127.190444 35.742000 512.780562 
 127.190556 35.742000 515.848099 
 127.190667 35.742000 520.524815 
 127.190778 35.742000 520.568009 
 127.190889 35.742000 515.901313 
 127.191000 35.742000 508.504490 
 127.191111 35.742000 503.918280 
 127.191222 35.742000 504.053360 
 127.191333 35.742000 500.776211 
 127.191444 35.742000 485.198864 
 127.191556 35.742000 480.675284 
 127.191667 35.742000 476.464027 
 127.191778 35.742000 480.681321 
 127.190556 35.742000 515.848099 
 127.190667 35.742000 520.524815 
 127.190778 35.742000 520.568009 
 127.190889 35.742000 515.901313 
 127.191000 35.742000 508.504490 
 127.191111 35.742000 503.918280 
 127.191222 35.742000 504.053360 
 127.191333 35.742000 500.776211 
 127.191444 35.742000 485.198864 
 127.191556 35.742000 480.675284 
 127.191667 35.742000 476.464027 
 127.191778 35.742000 480.681321 
 127.191889 35.742000 487.474304 
 127.190556 35.742111 515.897005 
 127.190667 35.742111 520.591642 
 127.190778 35.742111 521.200997 
 127.190889 35.742111 519.369371 
 127.191000 35.742111 512.451473 
 127.191111 35.742111 508.152595 
 127.191222 35.742111 508.213561 
 127.191333 35.742111 508.150685 
 127.191444 35.742111 494.693778 
 127.191556 35.742111 489.367900 
 127.191667 35.742111 480.003927 
 127.191778 35.742111 484.017701 
 127.191889 35.742111 489.365925 
 127.190556 35.742222 516.057077 
 127.190667 35.742222 521.518404 
 127.190778 35.742222 520.975440 
 127.190889 35.742222 516.240909 
 127.191000 35.742222 509.867700 
 127.191111 35.742222 508.183401 
 127.191222 35.742222 510.132128 
 127.191333 35.742222 509.962737 
 127.191444 35.742222 508.137510 
 127.191556 35.742222 503.859304 
 127.191667 35.742222 485.171816 
 127.191778 35.742222 486.061363 
 127.191889 35.742222 489.427967 
 127.190667 35.742222 521.518404 
 127.190778 35.742222 520.975440 
 127.190889 35.742222 516.240909 
 127.191000 35.742222 509.867700 
 127.191111 35.742222 508.183401 
 127.191222 35.742222 510.132128 
 127.191333 35.742222 509.962737 
 127.191444 35.742222 508.137510 
 127.191556 35.742222 503.859304 
 127.191667 35.742222 485.171816 
 127.191778 35.742222 486.061363 
 127.191889 35.742222 489.427967 
 127.192000 35.742222 481.527749 
 127.190667 35.742333 522.420443 
 127.190778 35.742333 520.529923 
 127.190889 35.742333 512.459259 
 127.191000 35.742333 504.047017 
 127.191111 35.742333 508.016521 
 127.191222 35.742333 508.287945 
 127.191333 35.742333 509.849245 
 127.191444 35.742333 512.452495 
 127.191556 35.742333 509.951847 
 127.191667 35.742333 492.446337 
 127.191778 35.742333 489.382521 
 127.191889 35.742333 489.489443 
 127.192000 35.742333 479.892645 
 127.190667 35.742444 520.968103 
 127.190778 35.742444 515.907930 
 127.190889 35.742444 504.829468 
 127.191000 35.742444 496.420448 
 127.191111 35.742444 503.776382 
 127.191222 35.742444 508.113526 
 127.191333 35.742444 508.145473 
 127.191444 35.742444 512.386471 
 127.191556 35.742444 511.527545 
 127.191667 35.742444 500.880314 
 127.191778 35.742444 493.911955 
 127.191889 35.742444 489.712725 
 127.192000 35.742444 480.668726 
 127.190778 35.742444 515.907930 
 127.190889 35.742444 504.829468 
 127.191000 35.742444 496.420448 
 127.191111 35.742444 503.776382 
 127.191222 35.742444 508.113526 
 127.191333 35.742444 508.145473 
 127.191444 35.742444 512.386471 
 127.191556 35.742444 511.527545 
 127.191667 35.742444 500.880314 
 127.191778 35.742444 493.911955 
 127.191889 35.742444 489.712725 
 127.192000 35.742444 480.668726 
 127.192111 35.742444 481.629277 
 127.190778 35.742555 512.226250 
 127.190889 35.742555 496.634581 
 127.191000 35.742555 493.927433 
 127.191111 35.742555 500.853530 
 127.191222 35.742555 504.033330 
 127.191333 35.742555 500.882870 
 127.191444 35.742555 504.499991 
 127.191556 35.742555 508.150824 
 127.191667 35.742555 504.046069 
 127.191778 35.742555 495.793036 
 127.191889 35.742555 493.903123 
 127.192000 35.742555 485.174284 
 127.192111 35.742555 487.577154 
 127.190778 35.742667 504.050320 
 127.190889 35.742667 493.928314 
 127.191000 35.742667 489.487379 
 127.191111 35.742667 496.579569 
 127.191222 35.742667 500.871566 
 127.191333 35.742667 493.972538 
 127.191444 35.742667 496.420015 
 127.191556 35.742667 504.059479 
 127.191667 35.742667 504.048365 
 127.191778 35.742667 496.422754 
 127.191889 35.742667 493.964479 
 127.192000 35.742667 489.397352 
 127.192111 35.742667 489.569695 
 127.190889 35.742667 493.928314 
 127.191000 35.742667 489.487379 
 127.191111 35.742667 496.579569 
 127.191222 35.742667 500.871566 
 127.191333 35.742667 493.972538 
 127.191444 35.742667 496.420015 
 127.191556 35.742667 504.059479 
 127.191667 35.742667 504.048365 
 127.191778 35.742667 496.422754 
 127.191889 35.742667 493.964479 
 127.192000 35.742667 489.397352 
 127.192111 35.742667 489.569695 
 127.192222 35.742667 489.387577 
 127.190889 35.742778 489.394542 
 127.191000 35.742778 489.381002 
 127.191111 35.742778 495.709587 
 127.191222 35.742778 496.324885 
 127.191333 35.742778 489.617260 
 127.191444 35.742778 493.827319 
 127.191556 35.742778 500.984156 
 127.191667 35.742778 503.660081 
 127.191778 35.742778 496.421899 
 127.191889 35.742778 494.542142 
 127.192000 35.742778 493.483594 
 127.192111 35.742778 489.581660 
 127.192222 35.742778 487.606084 
 127.190889 35.742889 487.608230 
 127.191000 35.742889 487.540609 
 127.191111 35.742889 487.566333 
 127.191222 35.742889 487.569129 
 127.191333 35.742889 487.898061 
 127.191444 35.742889 489.397159 
 127.191556 35.742889 496.336353 
 127.191667 35.742889 496.477809 
 127.191778 35.742889 496.367193 
 127.191889 35.742889 494.344921 
 127.192000 35.742889 491.387096 
 127.192111 35.742889 489.390302 
 127.192222 35.742889 487.449900 
 127.191000 35.742889 487.540609 
 127.191111 35.742889 487.566333 
 127.191222 35.742889 487.569129 
 127.191333 35.742889 487.898061 
 127.191444 35.742889 489.397159 
 127.191556 35.742889 496.336353 
 127.191667 35.742889 496.477809 
 127.191778 35.742889 496.367193 
 127.191889 35.742889 494.344921 
 127.192000 35.742889 491.387096 
 127.192111 35.742889 489.390302 
 127.192222 35.742889 487.449900 
 127.192333 35.742889 486.073501 
 127.191000 35.743000 481.551971 
 127.191111 35.743000 476.490302 
 127.191222 35.743000 476.643754 
 127.191333 35.743000 485.340505 
 127.191444 35.743000 487.559714 
 127.191556 35.743000 487.401677 
 127.191667 35.743000 487.992557 
 127.191778 35.743000 493.931449 
 127.191889 35.743000 493.930351 
 127.192000 35.743000 489.375747 
 127.192111 35.743000 487.518040 
 127.192222 35.743000 485.998888 
 127.192333 35.743000 486.026185 
 127.191000 35.743111 473.896398 
 127.191111 35.743111 468.275509 
 127.191222 35.743111 469.011812 
 127.191333 35.743111 478.200896 
 127.191444 35.743111 481.562132 
 127.191556 35.743111 480.684389 
 127.191667 35.743111 481.341914 
 127.191778 35.743111 487.405027 
 127.191889 35.743111 487.563624 
 127.192000 35.743111 485.985792 
 127.192111 35.743111 485.177901 
 127.192222 35.743111 485.932026 
 127.192333 35.743111 485.997916 
 127.191111 35.743111 468.275509 
 127.191222 35.743111 469.011812 
 127.191333 35.743111 478.200896 
 127.191444 35.743111 481.562132 
 127.191556 35.743111 480.684389 
 127.191667 35.743111 481.341914 
 127.191778 35.743111 487.405027 
 127.191889 35.743111 487.563624 
 127.192000 35.743111 485.985792 
 127.192111 35.743111 485.177901 
 127.192222 35.743111 485.932026 
 127.192333 35.743111 485.997916 
 127.192444 35.743111 486.576220 
 127.191111 35.743222 464.195365 
 127.191222 35.743222 463.756902 
 127.191333 35.743222 470.053326 
 127.191444 35.743222 473.598164 
 127.191556 35.743222 478.173332 
 127.191667 35.743222 478.179956 
 127.191778 35.743222 478.174814 
 127.191889 35.743222 478.277466 
 127.192000 35.743222 480.705178 
 127.192111 35.743222 481.567751 
 127.192222 35.743222 485.172080 
 127.192333 35.743222 485.985740 
 127.192444 35.743222 486.077326 
 127.191111 35.743333 462.303704 
 127.191222 35.743333 463.605132 
 127.191333 35.743333 468.275442 
 127.191444 35.743333 467.556756 
 127.191556 35.743333 471.058135 
 127.191667 35.743333 472.474389 
 127.191778 35.743333 471.439946 
 127.191889 35.743333 471.755523 
 127.192000 35.743333 476.463692 
 127.192111 35.743333 479.860258 
 127.192222 35.743333 481.540592 
 127.192333 35.743333 484.969843 
 127.192444 35.743333 485.979742 
 127.191222 35.743333 463.605132 
 127.191333 35.743333 468.275442 
 127.191444 35.743333 467.556756 
 127.191556 35.743333 471.058135 
 127.191667 35.743333 472.474389 
 127.191778 35.743333 471.439946 
 127.191889 35.743333 471.755523 
 127.192000 35.743333 476.463692 
 127.192111 35.743333 479.860258 
 127.192222 35.743333 481.540592 
 127.192333 35.743333 484.969843 
 127.192444 35.743333 485.979742 
 127.192556 35.743333 485.173380 
 127.191222 35.743444 463.705607 
 127.191333 35.743444 463.318110 
 127.191444 35.743444 462.254201 
 127.191556 35.743444 464.193465 
 127.191667 35.743444 464.075024 
 127.191778 35.743444 467.556442 
 127.191889 35.743444 469.237425 
 127.192000 35.743444 469.300348 
 127.192111 35.743444 474.431992 
 127.192222 35.743444 478.180272 
 127.192333 35.743444 478.813374 
 127.192444 35.743444 481.573597 
 127.192556 35.743444 480.849646 
 127.191222 35.743555 463.951670 
 127.191333 35.743555 460.233378 
 127.191444 35.743555 456.642349 
 127.191556 35.743555 458.421355 
 127.191667 35.743555 458.427403 
 127.191778 35.743555 463.390496 
 127.191889 35.743555 465.677542 
 127.192000 35.743555 464.173807 
 127.192111 35.743555 467.580328 
 127.192222 35.743555 470.052625 
 127.192333 35.743555 469.266470 
 127.192444 35.743555 476.463657 
 127.192556 35.743555 479.853571 
 127.191333 35.743555 460.233378 
 127.191444 35.743555 456.642349 
 127.191556 35.743555 458.421355 
 127.191667 35.743555 458.427403 
 127.191778 35.743555 463.390496 
 127.191889 35.743555 465.677542 
 127.192000 35.743555 464.173807 
 127.192111 35.743555 467.580328 
 127.192222 35.743555 470.052625 
 127.192333 35.743555 469.266470 
 127.192444 35.743555 476.463657 
 127.192556 35.743555 479.853571 
 127.192667 35.743555 478.705183 
 127.191333 35.743667 453.916535 
 127.191444 35.743667 449.633187 
 127.191556 35.743667 456.643235 
 127.191667 35.743667 451.779923 
 127.191778 35.743667 453.090597 
 127.191889 35.743667 458.429757 
 127.192000 35.743667 457.675092 
 127.192111 35.743667 461.379319 
 127.192222 35.743667 462.243742 
 127.192333 35.743667 461.438616 
 127.192444 35.743667 467.564980 
 127.192556 35.743667 476.474162 
 127.192667 35.743667 473.855840 
 127.191333 35.743778 449.534468 
 127.191444 35.743778 446.862897 
 127.191556 35.743778 448.559848 
 127.191667 35.743778 444.627922 
 127.191778 35.743778 441.137993 
 127.191889 35.743778 444.200882 
 127.192000 35.743778 449.630146 
 127.192111 35.743778 453.004383 
 127.192222 35.743778 453.238085 
 127.192333 35.743778 458.289086 
 127.192444 35.743778 461.377270 
 127.192556 35.743778 469.265562 
 127.192667 35.743778 465.393817 
 127.191444 35.743778 446.862897 
 127.191556 35.743778 448.559848 
 127.191667 35.743778 444.627922 
 127.191778 35.743778 441.137993 
 127.191889 35.743778 444.200882 
 127.192000 35.743778 449.630146 
 127.192111 35.743778 453.004383 
 127.192222 35.743778 453.238085 
 127.192333 35.743778 458.289086 
 127.192444 35.743778 461.377270 
 127.192556 35.743778 469.265562 
 127.192667 35.743778 465.393817 
 127.192778 35.743778 468.274802 
 127.191444 35.743889 440.273752 
 127.191556 35.743889 430.328561 
 127.191667 35.743889 437.071795 
 127.191778 35.743889 434.438317 
 127.191889 35.743889 431.928826 
 127.192000 35.743889 439.820923 
 127.192111 35.743889 442.590227 
 127.192222 35.743889 446.253590 
 127.192333 35.743889 456.558014 
 127.192444 35.743889 457.563352 
 127.192556 35.743889 461.375432 
 127.192667 35.743889 460.121470 
 127.192778 35.743889 468.275051 
 127.191444 35.744000 429.047104 
 127.191556 35.744000 422.463928 
 127.191667 35.744000 429.056436 
 127.191778 35.744000 429.046930 
 127.191889 35.744000 429.049827 
 127.192000 35.744000 431.837541 
 127.192111 35.744000 437.073338 
 127.192222 35.744000 441.127926 
 127.192333 35.744000 451.191095 
 127.192444 35.744000 451.779501 
 127.192556 35.744000 455.234531 
 127.192667 35.744000 457.674052 
 127.192778 35.744000 465.668727 
 127.191556 35.744000 422.463928 
 127.191667 35.744000 429.056436 
 127.191778 35.744000 429.046930 
 127.191889 35.744000 429.049827 
 127.192000 35.744000 431.837541 
 127.192111 35.744000 437.073338 
 127.192222 35.744000 441.127926 
 127.192333 35.744000 451.191095 
 127.192444 35.744000 451.779501 
 127.192556 35.744000 455.234531 
 127.192667 35.744000 457.674052 
 127.192778 35.744000 465.668727 
 127.192889 35.744000 464.164500 
 127.191556 35.744111 420.325105 
 127.191667 35.744111 416.618707 
 127.191778 35.744111 420.150371 
 127.191889 35.744111 427.734393 
 127.192000 35.744111 429.076097 
 127.192111 35.744111 434.282354 
 127.192222 35.744111 437.834956 
 127.192333 35.744111 444.765670 
 127.192444 35.744111 444.775559 
 127.192556 35.744111 450.937215 
 127.192667 35.744111 456.639958 
 127.192778 35.744111 462.919759 
 127.192889 35.744111 461.363802 
 127.191556 35.744222 417.583860 
 127.191667 35.744222 410.111232 
 127.191778 35.744222 413.036077 
 127.191889 35.744222 422.825008 
 127.192000 35.744222 427.731997 
 127.192111 35.744222 430.251081 
 127.192222 35.744222 434.264624 
 127.192333 35.744222 437.850761 
 127.192444 35.744222 439.825901 
 127.192556 35.744222 448.121982 
 127.192667 35.744222 450.873598 
 127.192778 35.744222 460.120702 
 127.192889 35.744222 460.120976 
 127.191667 35.744222 410.111232 
 127.191778 35.744222 413.036077 
 127.191889 35.744222 422.825008 
 127.192000 35.744222 427.731997 
 127.192111 35.744222 430.251081 
 127.192222 35.744222 434.264624 
 127.192333 35.744222 437.850761 
 127.192444 35.744222 439.825901 
 127.192556 35.744222 448.121982 
 127.192667 35.744222 450.873598 
 127.192778 35.744222 460.120702 
 127.192889 35.744222 460.120976 
 127.193000 35.744222 460.065890 
 127.191667 35.744333 407.622648 
 127.191778 35.744333 407.474811 
 127.191889 35.744333 416.602018 
 127.192000 35.744333 421.629977 
 127.192111 35.744333 425.639085 
 127.192222 35.744333 429.046847 
 127.192333 35.744333 436.347785 
 127.192444 35.744333 437.848017 
 127.192556 35.744333 446.886708 
 127.192667 35.744333 451.162942 
 127.192778 35.744333 457.799577 
 127.192889 35.744333 459.792480 
 127.193000 35.744333 458.650446 
 127.191667 35.744444 405.900656 
 127.191778 35.744444 408.551854 
 127.191889 35.744444 413.457241 
 127.192000 35.744444 414.815631 
 127.192111 35.744444 420.186628 
 127.192222 35.744444 425.730470 
 127.192333 35.744444 434.276478 
 127.192444 35.744444 437.845493 
 127.192556 35.744444 446.885220 
 127.192667 35.744444 451.087295 
 127.192778 35.744444 457.647682 
 127.192889 35.744444 458.427282 
 127.193000 35.744444 458.585262 
 127.191778 35.744444 408.551854 
 127.191889 35.744444 413.457241 
 127.192000 35.744444 414.815631 
 127.192111 35.744444 420.186628 
 127.192222 35.744444 425.730470 
 127.192333 35.744444 434.276478 
 127.192444 35.744444 437.845493 
 127.192556 35.744444 446.885220 
 127.192667 35.744444 451.087295 
 127.192778 35.744444 457.647682 
 127.192889 35.744444 458.427282 
 127.193000 35.744444 458.585262 
 127.193111 35.744444 464.112092 
 127.191778 35.744556 409.106957 
 127.191889 35.744556 408.045057 
 127.192000 35.744556 413.317740 
 127.192111 35.744556 419.841629 
 127.192222 35.744556 423.388326 
 127.192333 35.744556 431.917092 
 127.192444 35.744556 437.957415 
 127.192556 35.744556 446.900929 
 127.192667 35.744556 450.346172 
 127.192778 35.744556 457.491715 
 127.192889 35.744556 457.828014 
 127.193000 35.744556 460.110117 
 127.193111 35.744556 463.317646 
 127.191778 35.744667 408.674397 
 127.191889 35.744667 409.745894 
 127.192000 35.744667 412.270387 
 127.192111 35.744667 419.407949 
 127.192222 35.744667 423.505277 
 127.192333 35.744667 431.837774 
 127.192444 35.744667 440.064622 
 127.192556 35.744667 448.613319 
 127.192667 35.744667 449.689549 
 127.192778 35.744667 455.454542 
 127.192889 35.744667 457.674615 
 127.193000 35.744667 460.180476 
 127.193111 35.744667 464.962836 
 127.191889 35.744778 409.317572 
 127.192000 35.744778 412.273795 
 127.192111 35.744778 420.321349 
 127.192222 35.744778 425.733515 
 127.192333 35.744778 431.824234 
 127.192444 35.744778 442.650326 
 127.192556 35.744778 448.859800 
 127.192667 35.744778 449.633429 
 127.192778 35.744778 455.235016 
 127.192889 35.744778 457.674794 
 127.193000 35.744778 461.398094 
 127.193111 35.744778 465.666732 
 127.193222 35.744778 468.260050 
 127.191889 35.744889 410.104834 
 127.192000 35.744889 413.352924 
 127.192111 35.744889 421.782928 
 127.192222 35.744889 427.731616 
 127.192333 35.744889 431.837562 
 127.192444 35.744889 446.279634 
 127.192556 35.744889 448.396623 
 127.192667 35.744889 449.633522 
 127.192778 35.744889 455.235435 
 127.192889 35.744889 458.401583 
 127.193000 35.744889 463.318963 
 127.193111 35.744889 468.274624 
 127.193222 35.744889 467.559208 
 127.191889 35.745000 409.077343 
 127.192000 35.745000 414.171894 
 127.192111 35.745000 423.543218 
 127.192222 35.745000 428.690212 
 127.192333 35.745000 431.973495 
 127.192444 35.745000 446.291818 
 127.192556 35.745000 448.201820 
 127.192667 35.745000 449.796730 
 127.192778 35.745000 455.491075 
 127.192889 35.745000 458.555299 
 127.193000 35.745000 468.275410 
 127.193111 35.745000 469.209041 
 127.193222 35.745000 469.265537 
 127.192000 35.745000 414.171894 
 127.192111 35.745000 423.543218 
 127.192222 35.745000 428.690212 
 127.192333 35.745000 431.973495 
 127.192444 35.745000 446.291818 
 127.192556 35.745000 448.201820 
 127.192667 35.745000 449.796730 
 127.192778 35.745000 455.491075 
 127.192889 35.745000 458.555299 
 127.193000 35.745000 468.275410 
 127.193111 35.745000 469.209041 
 127.193222 35.745000 469.265537 
 127.193333 35.745000 469.362915 
 127.192000 35.745111 416.953210 
 127.192111 35.745111 425.849130 
 127.192222 35.745111 429.212282 
 127.192333 35.745111 434.983226 
 127.192444 35.745111 446.291804 
 127.192556 35.745111 448.104664 
 127.192667 35.745111 451.161814 
 127.192778 35.745111 457.502589 
 127.192889 35.745111 460.119937 
 127.193000 35.745111 467.572183 
 127.193111 35.745111 469.265501 
 127.193222 35.745111 469.286850 
 127.193333 35.745111 469.266484 
 127.192000 35.745222 420.324057 
 127.192111 35.745222 428.726316 
 127.192222 35.745222 431.836258 
 127.192333 35.745222 437.077791 
 127.192444 35.745222 446.291459 
 127.192556 35.745222 448.071913 
 127.192667 35.745222 451.774190 
 127.192778 35.745222 458.428265 
 127.192889 35.745222 460.364346 
 127.193000 35.745222 467.561063 
 127.193111 35.745222 469.266386 
 127.193222 35.745222 469.266436 
 127.193333 35.745222 468.275563 
 127.192111 35.745222 428.726316 
 127.192222 35.745222 431.836258 
 127.192333 35.745222 437.077791 
 127.192444 35.745222 446.291459 
 127.192556 35.745222 448.071913 
 127.192667 35.745222 451.774190 
 127.192778 35.745222 458.428265 
 127.192889 35.745222 460.364346 
 127.193000 35.745222 467.561063 
 127.193111 35.745222 469.266386 
 127.193222 35.745222 469.266436 
 127.193333 35.745222 468.275563 
 127.193444 35.745222 460.195264 
 127.192111 35.745333 430.250236 
 127.192222 35.745333 436.109373 
 127.192333 35.745333 439.825827 
 127.192444 35.745333 446.283817 
 127.192556 35.745333 449.638885 
 127.192667 35.745333 455.608236 
 127.192778 35.745333 461.812701 
 127.192889 35.745333 464.181261 
 127.193000 35.745333 469.266100 
 127.193111 35.745333 469.265568 
 127.193222 35.745333 468.275559 
 127.193333 35.745333 462.254792 
 127.193444 35.745333 453.004171 
 127.192111 35.745444 434.266499 
 127.192222 35.745444 437.848525 
 127.192333 35.745444 440.977417 
 127.192444 35.745444 446.869430 
 127.192556 35.745444 451.773628 
 127.192667 35.745444 458.430996 
 127.192778 35.745444 465.668477 
 127.192889 35.745444 468.271792 
 127.193000 35.745444 469.265858 
 127.193111 35.745444 469.265594 
 127.193222 35.745444 462.438096 
 127.193333 35.745444 455.237889 
 127.193444 35.745444 448.878652 
 127.192222 35.745444 437.848525 
 127.192333 35.745444 440.977417 
 127.192444 35.745444 446.869430 
 127.192556 35.745444 451.773628 
 127.192667 35.745444 458.430996 
 127.192778 35.745444 465.668477 
 127.192889 35.745444 468.271792 
 127.193000 35.745444 469.265858 
 127.193111 35.745444 469.265594 
 127.193222 35.745444 462.438096 
 127.193333 35.745444 455.237889 
 127.193444 35.745444 448.878652 
 127.193556 35.745444 436.422250 
 127.192222 35.745556 440.034986 
 127.192333 35.745556 442.043513 
 127.192444 35.745556 448.227076 
 127.192556 35.745556 455.254264 
 127.192667 35.745556 461.378043 
 127.192778 35.745556 467.556700 
 127.192889 35.745556 469.266448 
 127.193000 35.745556 469.530928 
 127.193111 35.745556 469.266481 
 127.193222 35.745556 459.962363 
 127.193333 35.745556 451.162865 
 127.193444 35.745556 445.193591 
 127.193556 35.745556 434.253800 
 127.192222 35.745667 440.757340 
 127.192333 35.745667 442.642915 
 127.192444 35.745667 450.720540 
 127.192556 35.745667 455.938663 
 127.192667 35.745667 464.195481 
 127.192778 35.745667 469.266481 
 127.192889 35.745667 469.284793 
 127.193000 35.745667 470.051900 
 127.193111 35.745667 469.266352 
 127.193222 35.745667 458.423537 
 127.193333 35.745667 448.071898 
 127.193444 35.745667 442.558435 
 127.193556 35.745667 431.839558 
 127.192333 35.745667 442.642915 
 127.192444 35.745667 450.720540 
 127.192556 35.745667 455.938663 
 127.192667 35.745667 464.195481 
 127.192778 35.745667 469.266481 
 127.192889 35.745667 469.284793 
 127.193000 35.745667 470.051900 
 127.193111 35.745667 469.266352 
 127.193222 35.745667 458.423537 
 127.193333 35.745667 448.071898 
 127.193444 35.745667 442.558435 
 127.193556 35.745667 431.839558 
 127.193667 35.745667 430.250980 
 127.192333 35.745778 444.787658 
 127.192444 35.745778 451.164037 
 127.192556 35.745778 460.181269 
 127.192667 35.745778 468.246284 
 127.192778 35.745778 470.052041 
 127.192889 35.745778 471.755765 
 127.193000 35.745778 471.059235 
 127.193111 35.745778 469.265506 
 127.193222 35.745778 461.374639 
 127.193333 35.745778 449.632792 
 127.193444 35.745778 441.512928 
 127.193556 35.745778 431.838261 
 127.193667 35.745778 431.835218 
 127.192333 35.745889 446.257560 
 127.192444 35.745889 455.390584 
 127.192556 35.745889 463.832665 
 127.192667 35.745889 471.064678 
 127.192778 35.745889 473.893871 
 127.192889 35.745889 476.490253 
 127.193000 35.745889 476.464068 
 127.193111 35.745889 470.060707 
 127.193222 35.745889 463.316747 
 127.193333 35.745889 453.059778 
 127.193444 35.745889 444.620748 
 127.193556 35.745889 434.254882 
 127.193667 35.745889 434.282432 
 127.192444 35.745889 455.390584 
 127.192556 35.745889 463.832665 
 127.192667 35.745889 471.064678 
 127.192778 35.745889 473.893871 
 127.192889 35.745889 476.490253 
 127.193000 35.745889 476.464068 
 127.193111 35.745889 470.060707 
 127.193222 35.745889 463.316747 
 127.193333 35.745889 453.059778 
 127.193444 35.745889 444.620748 
 127.193556 35.745889 434.254882 
 127.193667 35.745889 434.282432 
 127.193778 35.745889 437.139763 
 127.192444 35.746000 461.434622 
 127.192556 35.746000 471.755227 
 127.192667 35.746000 478.157470 
 127.192778 35.746000 479.125031 
 127.192889 35.746000 481.640553 
 127.193000 35.746000 481.485052 
 127.193111 35.746000 472.387688 
 127.193222 35.746000 468.252916 
 127.193333 35.746000 460.278736 
 127.193444 35.746000 449.581257 
 127.193556 35.746000 437.072510 
 127.193667 35.746000 437.073973 
 127.193778 35.746000 437.888525 
 127.192444 35.746111 467.560828 
 127.192556 35.746111 476.463931 
 127.192667 35.746111 481.534950 
 127.192778 35.746111 485.996667 
 127.192889 35.746111 488.095657 
 127.193000 35.746111 485.989573 
 127.193111 35.746111 475.639119 
 127.193222 35.746111 469.266266 
 127.193333 35.746111 465.664331 
 127.193444 35.746111 457.674424 
 127.193556 35.746111 440.084000 
 127.193667 35.746111 439.783512 
 127.193778 35.746111 437.834693 
 127.192556 35.746111 476.463931 
 127.192667 35.746111 481.534950 
 127.192778 35.746111 485.996667 
 127.192889 35.746111 488.095657 
 127.193000 35.746111 485.989573 
 127.193111 35.746111 475.639119 
 127.193222 35.746111 469.266266 
 127.193333 35.746111 465.664331 
 127.193444 35.746111 457.674424 
 127.193556 35.746111 440.084000 
 127.193667 35.746111 439.783512 
 127.193778 35.746111 437.834693 
 127.193889 35.746111 422.867914 
 127.192556 35.746222 480.680872 
 127.192667 35.746222 487.558237 
 127.192778 35.746222 494.102123 
 127.192889 35.746222 493.914295 
 127.193000 35.746222 489.166107 
 127.193111 35.746222 479.538593 
 127.193222 35.746222 469.401262 
 127.193333 35.746222 467.557312 
 127.193444 35.746222 462.255756 
 127.193556 35.746222 444.739842 
 127.193667 35.746222 439.823952 
 127.193778 35.746222 436.355626 
 127.193889 35.746222 420.183369 
 127.192556 35.746333 485.177779 
 127.192667 35.746333 494.263932 
 127.192778 35.746333 500.892216 
 127.192889 35.746333 496.064867 
 127.193000 35.746333 493.729188 
 127.193111 35.746333 482.494539 
 127.193222 35.746333 470.052183 
 127.193333 35.746333 469.253257 
 127.193444 35.746333 463.538288 
 127.193556 35.746333 446.281271 
 127.193667 35.746333 437.809165 
 127.193778 35.746333 431.837853 
 127.193889 35.746333 419.896152 
 127.192667 35.746333 494.263932 
 127.192778 35.746333 500.892216 
 127.192889 35.746333 496.064867 
 127.193000 35.746333 493.729188 
 127.193111 35.746333 482.494539 
 127.193222 35.746333 470.052183 
 127.193333 35.746333 469.253257 
 127.193444 35.746333 463.538288 
 127.193556 35.746333 446.281271 
 127.193667 35.746333 437.809165 
 127.193778 35.746333 431.837853 
 127.193889 35.746333 419.896152 
 127.194000 35.746333 416.913410 
 127.192667 35.746444 500.889527 
 127.192778 35.746444 504.052093 
 127.192889 35.746444 497.471687 
 127.193000 35.746444 495.743623 
 127.193111 35.746444 487.564942 
 127.193222 35.746444 471.754463 
 127.193333 35.746444 469.258721 
 127.193444 35.746444 462.276540 
 127.193556 35.746444 446.289699 
 127.193667 35.746444 436.404009 
 127.193778 35.746444 430.248880 
 127.193889 35.746444 419.404195 
 127.194000 35.746444 415.139438 
 127.192667 35.746556 504.055690 
 127.192778 35.746556 504.783206 
 127.192889 35.746556 500.883762 
 127.193000 35.746556 497.169522 
 127.193111 35.746556 493.824507 
 127.193222 35.746556 472.477331 
 127.193333 35.746556 469.263315 
 127.193444 35.746556 458.438793 
 127.193556 35.746556 444.758389 
 127.193667 35.746556 435.620358 
 127.193778 35.746556 429.047007 
 127.193889 35.746556 416.605184 
 127.194000 35.746556 413.361548 
 127.192778 35.746556 504.783206 
 127.192889 35.746556 500.883762 
 127.193000 35.746556 497.169522 
 127.193111 35.746556 493.824507 
 127.193222 35.746556 472.477331 
 127.193333 35.746556 469.263315 
 127.193444 35.746556 458.438793 
 127.193556 35.746556 444.758389 
 127.193667 35.746556 435.620358 
 127.193778 35.746556 429.047007 
 127.193889 35.746556 416.605184 
 127.194000 35.746556 413.361548 
 127.194111 35.746556 398.911916 
 127.192778 35.746667 505.444855 
 127.192889 35.746667 501.044006 
 127.193000 35.746667 500.843273 
 127.193111 35.746667 493.967136 
 127.193222 35.746667 476.489882 
 127.193333 35.746667 469.265523 
 127.193444 35.746667 453.008414 
 127.193556 35.746667 442.554269 
 127.193667 35.746667 436.395877 
 127.193778 35.746667 425.744810 
 127.193889 35.746667 416.204905 
 127.194000 35.746667 409.019026 
 127.194111 35.746667 396.107586 
 127.192778 35.746778 504.243533 
 127.192889 35.746778 501.147515 
 127.193000 35.746778 500.704852 
 127.193111 35.746778 493.967399 
 127.193222 35.746778 478.136432 
 127.193333 35.746778 470.311596 
 127.193444 35.746778 451.120858 
 127.193556 35.746778 441.594711 
 127.193667 35.746778 437.086688 
 127.193778 35.746778 421.784823 
 127.193889 35.746778 414.713083 
 127.194000 35.746778 405.643761 
 127.194111 35.746778 397.700025 
 127.192889 35.746778 501.147515 
 127.193000 35.746778 500.704852 
 127.193111 35.746778 493.967399 
 127.193222 35.746778 478.136432 
 127.193333 35.746778 470.311596 
 127.193444 35.746778 451.120858 
 127.193556 35.746778 441.594711 
 127.193667 35.746778 437.086688 
 127.193778 35.746778 421.784823 
 127.193889 35.746778 414.713083 
 127.194000 35.746778 405.643761 
 127.194111 35.746778 397.700025 
 127.194222 35.746778 396.068225 
 127.192889 35.746889 500.946736 
 127.193000 35.746889 497.518025 
 127.193111 35.746889 493.942087 
 127.193222 35.746889 479.020765 
 127.193333 35.746889 471.058152 
 127.193444 35.746889 451.162028 
 127.193556 35.746889 442.566018 
 127.193667 35.746889 439.829275 
 127.193778 35.746889 422.782380 
 127.193889 35.746889 416.968646 
 127.194000 35.746889 409.632303 
 127.194111 35.746889 401.825514 
 127.194222 35.746889 401.827338 
 127.192889 35.747000 500.889561 
 127.193000 35.747000 496.529389 
 127.193111 35.747000 494.693321 
 127.193222 35.747000 480.636024 
 127.193333 35.747000 474.329338 
 127.193444 35.747000 456.643216 
 127.193556 35.747000 448.569064 
 127.193667 35.747000 444.805453 
 127.193778 35.747000 431.826329 
 127.193889 35.747000 423.546273 
 127.194000 35.747000 420.318818 
 127.194111 35.747000 409.807691 
 127.194222 35.747000 408.193473 
 127.193000 35.747000 496.529389 
 127.193111 35.747000 494.693321 
 127.193222 35.747000 480.636024 
 127.193333 35.747000 474.329338 
 127.193444 35.747000 456.643216 
 127.193556 35.747000 448.569064 
 127.193667 35.747000 444.805453 
 127.193778 35.747000 431.826329 
 127.193889 35.747000 423.546273 
 127.194000 35.747000 420.318818 
 127.194111 35.747000 409.807691 
 127.194222 35.747000 408.193473 
 127.194333 35.747000 416.782946 
 127.193000 35.747111 500.692094 
 127.193111 35.747111 500.867410 
 127.193222 35.747111 486.372919 
 127.193333 35.747111 480.694088 
 127.193444 35.747111 463.317123 
 127.193556 35.747111 457.675209 
 127.193667 35.747111 450.860678 
 127.193778 35.747111 446.291851 
 127.193889 35.747111 437.073248 
 127.194000 35.747111 431.838099 
 127.194111 35.747111 422.996306 
 127.194222 35.747111 419.404232 
 127.194333 35.747111 420.199998 
 127.193000 35.747222 504.013040 
 127.193111 35.747222 504.053742 
 127.193222 35.747222 496.398530 
 127.193333 35.747222 489.484906 
 127.193444 35.747222 472.473489 
 127.193556 35.747222 468.274743 
 127.193667 35.747222 460.131308 
 127.193778 35.747222 456.523817 
 127.193889 35.747222 448.101299 
 127.194000 35.747222 440.058859 
 127.194111 35.747222 431.839063 
 127.194222 35.747222 423.423318 
 127.194333 35.747222 421.037413 
 127.193111 35.747222 504.053742 
 127.193222 35.747222 496.398530 
 127.193333 35.747222 489.484906 
 127.193444 35.747222 472.473489 
 127.193556 35.747222 468.274743 
 127.193667 35.747222 460.131308 
 127.193778 35.747222 456.523817 
 127.193889 35.747222 448.101299 
 127.194000 35.747222 440.058859 
 127.194111 35.747222 431.839063 
 127.194222 35.747222 423.423318 
 127.194333 35.747222 421.037413 
 127.194444 35.747222 416.643356 
 127.193111 35.747333 504.637431 
 127.193222 35.747333 500.882418 
 127.193333 35.747333 496.414645 
 127.193444 35.747333 478.921193 
 127.193556 35.747333 472.130126 
 127.193667 35.747333 464.072261 
 127.193778 35.747333 460.187915 
 127.193889 35.747333 453.067758 
 127.194000 35.747333 442.899007 
 127.194111 35.747333 437.070692 
 127.194222 35.747333 425.591540 
 127.194333 35.747333 420.183827 
 127.194444 35.747333 417.574646 
 127.193111 35.747444 504.158960 
 127.193222 35.747444 500.947632 
 127.193333 35.747444 499.518837 
 127.193444 35.747444 485.173324 
 127.193556 35.747444 477.862589 
 127.193667 35.747444 468.273702 
 127.193778 35.747444 462.278551 
 127.193889 35.747444 456.625018 
 127.194000 35.747444 446.250724 
 127.194111 35.747444 439.412552 
 127.194222 35.747444 425.733173 
 127.194333 35.747444 420.325074 
 127.194444 35.747444 417.581245 
 127.193222 35.747444 500.947632 
 127.193333 35.747444 499.518837 
 127.193444 35.747444 485.173324 
 127.193556 35.747444 477.862589 
 127.193667 35.747444 468.273702 
 127.193778 35.747444 462.278551 
 127.193889 35.747444 456.625018 
 127.194000 35.747444 446.250724 
 127.194111 35.747444 439.412552 
 127.194222 35.747444 425.733173 
 127.194333 35.747444 420.325074 
 127.194444 35.747444 417.581245 
 127.194556 35.747444 416.789438 
 127.193222 35.747556 501.032208 
 127.193333 35.747556 500.882218 
 127.193444 35.747556 493.926215 
 127.193556 35.747556 485.173506 
 127.193667 35.747556 469.265588 
 127.193778 35.747556 465.636981 
 127.193889 35.747556 456.573961 
 127.194000 35.747556 448.431135 
 127.194111 35.747556 442.558206 
 127.194222 35.747556 427.734654 
 127.194333 35.747556 420.324471 
 127.194444 35.747556 419.423426 
 127.194556 35.747556 423.551453 
 127.193222 35.747667 501.245283 
 127.193333 35.747667 501.423913 
 127.193444 35.747667 500.852503 
 127.193556 35.747667 493.889889 
 127.193667 35.747667 471.127223 
 127.193778 35.747667 468.004014 
 127.193889 35.747667 456.639357 
 127.194000 35.747667 451.780046 
 127.194111 35.747667 449.859851 
 127.194222 35.747667 435.986211 
 127.194333 35.747667 422.495077 
 127.194444 35.747667 423.556869 
 127.194556 35.747667 431.838167 
 127.193333 35.747667 501.423913 
 127.193444 35.747667 500.852503 
 127.193556 35.747667 493.889889 
 127.193667 35.747667 471.127223 
 127.193778 35.747667 468.004014 
 127.193889 35.747667 456.639357 
 127.194000 35.747667 451.780046 
 127.194111 35.747667 449.859851 
 127.194222 35.747667 435.986211 
 127.194333 35.747667 422.495077 
 127.194444 35.747667 423.556869 
 127.194556 35.747667 431.838167 
 127.194667 35.747667 437.466014 
 127.193333 35.747778 503.861970 
 127.193444 35.747778 502.983637 
 127.193556 35.747778 496.442716 
 127.193667 35.747778 478.192956 
 127.193778 35.747778 474.337162 
 127.193889 35.747778 460.060358 
 127.194000 35.747778 456.373194 
 127.194111 35.747778 458.553263 
 127.194222 35.747778 451.175318 
 127.194333 35.747778 430.200658 
 127.194444 35.747778 431.836805 
 127.194556 35.747778 439.842636 
 127.194667 35.747778 440.054538 
 127.193333 35.747889 504.008517 
 127.193444 35.747889 503.892235 
 127.193556 35.747889 499.201822 
 127.193667 35.747889 485.988146 
 127.193778 35.747889 481.661284 
 127.193889 35.747889 467.559867 
 127.194000 35.747889 461.529399 
 127.194111 35.747889 465.666697 
 127.194222 35.747889 463.318253 
 127.194333 35.747889 442.582173 
 127.194444 35.747889 439.879726 
 127.194556 35.747889 442.570015 
 127.194667 35.747889 440.072777 
 127.193444 35.747889 503.892235 
 127.193556 35.747889 499.201822 
 127.193667 35.747889 485.988146 
 127.193778 35.747889 481.661284 
 127.193889 35.747889 467.559867 
 127.194000 35.747889 461.529399 
 127.194111 35.747889 465.666697 
 127.194222 35.747889 463.318253 
 127.194333 35.747889 442.582173 
 127.194444 35.747889 439.879726 
 127.194556 35.747889 442.570015 
 127.194667 35.747889 440.072777 
 127.194778 35.747889 442.453336 
 127.193444 35.748000 502.908287 
 127.193556 35.748000 496.420106 
 127.193667 35.748000 489.397498 
 127.193778 35.748000 487.565374 
 127.193889 35.748000 479.959203 
 127.194000 35.748000 473.883095 
 127.194111 35.748000 471.754069 
 127.194222 35.748000 470.052719 
 127.194333 35.748000 457.674570 
 127.194444 35.748000 446.250587 
 127.194556 35.748000 444.845464 
 127.194667 35.748000 440.198156 
 127.194778 35.748000 444.716383 
 127.193444 35.748111 500.885298 
 127.193556 35.748111 494.017178 
 127.193667 35.748111 489.763156 
 127.193778 35.748111 489.180593 
 127.193889 35.748111 487.026993 
 127.194000 35.748111 481.638088 
 127.194111 35.748111 474.404410 
 127.194222 35.748111 472.466500 
 127.194333 35.748111 467.992579 
 127.194444 35.748111 456.643003 
 127.194556 35.748111 446.256090 
 127.194667 35.748111 441.159636 
 127.194778 35.748111 446.291846 
 127.193556 35.748111 494.017178 
 127.193667 35.748111 489.763156 
 127.193778 35.748111 489.180593 
 127.193889 35.748111 487.026993 
 127.194000 35.748111 481.638088 
 127.194111 35.748111 474.404410 
 127.194222 35.748111 472.466500 
 127.194333 35.748111 467.992579 
 127.194444 35.748111 456.643003 
 127.194556 35.748111 446.256090 
 127.194667 35.748111 441.159636 
 127.194778 35.748111 446.291846 
 127.194889 35.748111 449.624765 
 127.193556 35.748222 493.929658 
 127.193667 35.748222 490.288511 
 127.193778 35.748222 487.664506 
 127.193889 35.748222 487.568759 
 127.194000 35.748222 486.021061 
 127.194111 35.748222 476.489871 
 127.194222 35.748222 473.771744 
 127.194333 35.748222 474.219428 
 127.194444 35.748222 467.575688 
 127.194556 35.748222 451.302390 
 127.194667 35.748222 446.291849 
 127.194778 35.748222 448.855829 
 127.194889 35.748222 456.608668 
 127.193556 35.748333 493.920207 
 127.193667 35.748333 489.598396 
 127.193778 35.748333 485.174929 
 127.193889 35.748333 484.730039 
 127.194000 35.748333 485.184541 
 127.194111 35.748333 476.396219 
 127.194222 35.748333 474.433656 
 127.194333 35.748333 478.601624 
 127.194444 35.748333 476.503428 
 127.194556 35.748333 467.736392 
 127.194667 35.748333 457.503467 
 127.194778 35.748333 455.430459 
 127.194889 35.748333 462.202533 
 127.193667 35.748333 489.598396 
 127.193778 35.748333 485.174929 
 127.193889 35.748333 484.730039 
 127.194000 35.748333 485.184541 
 127.194111 35.748333 476.396219 
 127.194222 35.748333 474.433656 
 127.194333 35.748333 478.601624 
 127.194444 35.748333 476.503428 
 127.194556 35.748333 467.736392 
 127.194667 35.748333 457.503467 
 127.194778 35.748333 455.430459 
 127.194889 35.748333 462.202533 
 127.195000 35.748333 469.266250 
 127.193667 35.748444 489.317350 
 127.193778 35.748444 476.487514 
 127.193889 35.748444 474.432568 
 127.194000 35.748444 476.486856 
 127.194111 35.748444 471.060219 
 127.194222 35.748444 476.489900 
 127.194333 35.748444 479.859652 
 127.194444 35.748444 479.859969 
 127.194556 35.748444 476.463701 
 127.194667 35.748444 471.755801 
 127.194778 35.748444 464.147013 
 127.194889 35.748444 468.154649 
 127.195000 35.748444 471.468060 
 127.193667 35.748556 485.188470 
 127.193778 35.748556 469.265983 
 127.193889 35.748556 467.559386 
 127.194000 35.748556 468.263451 
 127.194111 35.748556 468.023193 
 127.194222 35.748556 478.052138 
 127.194333 35.748556 479.874888 
 127.194444 35.748556 479.860008 
 127.194556 35.748556 479.859671 
 127.194667 35.748556 478.187239 
 127.194778 35.748556 469.265502 
 127.194889 35.748556 469.264393 
 127.195000 35.748556 471.058121 
 127.193778 35.748556 469.265983 
 127.193889 35.748556 467.559386 
 127.194000 35.748556 468.263451 
 127.194111 35.748556 468.023193 
 127.194222 35.748556 478.052138 
 127.194333 35.748556 479.874888 
 127.194444 35.748556 479.860008 
 127.194556 35.748556 479.859671 
 127.194667 35.748556 478.187239 
 127.194778 35.748556 469.265502 
 127.194889 35.748556 469.264393 
 127.195000 35.748556 471.058121 
 127.195111 35.748556 473.840894 
 127.193778 35.748667 466.319458 
 127.193889 35.748667 463.334831 
 127.194000 35.748667 461.142869 
 127.194111 35.748667 462.602839 
 127.194222 35.748667 478.167694 
 127.194333 35.748667 479.065035 
 127.194444 35.748667 476.465582 
 127.194556 35.748667 479.069668 
 127.194667 35.748667 479.030663 
 127.194778 35.748667 472.445117 
 127.194889 35.748667 471.752883 
 127.195000 35.748667 471.065740 
 127.195111 35.748667 471.058280 
 127.193778 35.748778 465.550131 
 127.193889 35.748778 464.152893 
 127.194000 35.748778 457.947817 
 127.194111 35.748778 461.376718 
 127.194222 35.748778 476.463877 
 127.194333 35.748778 474.405651 
 127.194444 35.748778 467.667103 
 127.194556 35.748778 472.477183 
 127.194667 35.748778 472.830073 
 127.194778 35.748778 471.060594 
 127.194889 35.748778 471.059376 
 127.195000 35.748778 469.954870 
 127.195111 35.748778 467.556881 
 127.193889 35.748778 464.152893 
 127.194000 35.748778 457.947817 
 127.194111 35.748778 461.376718 
 127.194222 35.748778 476.463877 
 127.194333 35.748778 474.405651 
 127.194444 35.748778 467.667103 
 127.194556 35.748778 472.477183 
 127.194667 35.748778 472.830073 
 127.194778 35.748778 471.060594 
 127.194889 35.748778 471.059376 
 127.195000 35.748778 469.954870 
 127.195111 35.748778 467.556881 
 127.195222 35.748778 455.235092 
 127.193889 35.748889 462.190492 
 127.194000 35.748889 455.238415 
 127.194111 35.748889 460.119015 
 127.194222 35.748889 473.826238 
 127.194333 35.748889 469.490649 
 127.194444 35.748889 462.254891 
 127.194556 35.748889 464.188199 
 127.194667 35.748889 464.193093 
 127.194778 35.748889 468.013984 
 127.194889 35.748889 467.557305 
 127.195000 35.748889 462.253829 
 127.195111 35.748889 458.431793 
 127.195222 35.748889 450.873756 
 127.193889 35.749000 460.194318 
 127.194000 35.749000 455.698828 
 127.194111 35.749000 455.258444 
 127.194222 35.749000 468.268838 
 127.194333 35.749000 463.316782 
 127.194444 35.749000 460.168779 
 127.194556 35.749000 458.429306 
 127.194667 35.749000 457.608193 
 127.194778 35.749000 456.112632 
 127.194889 35.749000 457.498176 
 127.195000 35.749000 449.616366 
 127.195111 35.749000 448.877574 
 127.195222 35.749000 451.151260 
 127.194000 35.749000 455.698828 
 127.194111 35.749000 455.258444 
 127.194222 35.749000 468.268838 
 127.194333 35.749000 463.316782 
 127.194444 35.749000 460.168779 
 127.194556 35.749000 458.429306 
 127.194667 35.749000 457.608193 
 127.194778 35.749000 456.112632 
 127.194889 35.749000 457.498176 
 127.195000 35.749000 449.616366 
 127.195111 35.749000 448.877574 
 127.195222 35.749000 451.151260 
 127.195333 35.749000 451.201758 
 127.194000 35.749111 453.008537 
 127.194111 35.749111 449.633614 
 127.194222 35.749111 449.680288 
 127.194333 35.749111 455.255072 
 127.194444 35.749111 455.444156 
 127.194556 35.749111 455.442182 
 127.194667 35.749111 450.864594 
 127.194778 35.749111 444.750562 
 127.194889 35.749111 444.773854 
 127.195000 35.749111 440.144574 
 127.195111 35.749111 442.311992 
 127.195222 35.749111 448.138574 
 127.195333 35.749111 448.408847 
 127.194000 35.749222 449.662322 
 127.194111 35.749222 437.034675 
 127.194222 35.749222 425.641831 
 127.194333 35.749222 439.823833 
 127.194444 35.749222 444.743118 
 127.194556 35.749222 442.558045 
 127.194667 35.749222 441.173476 
 127.194778 35.749222 437.036970 
 127.194889 35.749222 436.409455 
 127.195000 35.749222 434.271823 
 127.195111 35.749222 437.843851 
 127.195222 35.749222 441.439833 
 127.195333 35.749222 440.064275 
 127.194111 35.749333 420.321467 
 127.194222 35.749333 411.604684 
 127.194333 35.749333 416.603026 
 127.194444 35.749333 419.418436 
 127.194556 35.749333 417.587433 
 127.194667 35.749333 416.959582 
 127.194778 35.749333 423.548461 
 127.194889 35.749333 423.640305 
 127.195000 35.749333 421.784312 
 127.195111 35.749333 429.047040 
 127.195222 35.749333 427.734730 
 127.195333 35.749333 422.796180 
 127.195444 35.749333 426.081561 
 127.194111 35.749444 409.807655 
 127.194222 35.749444 407.230115 
 127.194333 35.749444 407.549290 
 127.194444 35.749444 404.337534 
 127.194556 35.749444 404.222240 
 127.194667 35.749444 398.912019 
 127.194778 35.749444 405.951524 
 127.194889 35.749444 405.899569 
 127.195000 35.749444 405.555511 
 127.195111 35.749444 413.941876 
 127.195222 35.749444 414.164862 
 127.195333 35.749444 414.670930 
 127.195444 35.749444 425.741473 
 127.194111 35.749556 407.583509 
 127.194222 35.749556 405.900562 
 127.194333 35.749556 400.162272 
 127.194444 35.749556 396.065234 
 127.194556 35.749556 400.945587 
 127.194667 35.749556 396.094989 
 127.194778 35.749556 393.974127 
 127.194889 35.749556 392.032673 
 127.195000 35.749556 393.226318 
 127.195111 35.749556 400.945425 
 127.195222 35.749556 410.079469 
 127.195333 35.749556 413.870250 
 127.195444 35.749556 425.765163 
 127.194222 35.749556 405.900562 
 127.194333 35.749556 400.162272 
 127.194444 35.749556 396.065234 
 127.194556 35.749556 400.945587 
 127.194667 35.749556 396.094989 
 127.194778 35.749556 393.974127 
 127.194889 35.749556 392.032673 
 127.195000 35.749556 393.226318 
 127.195111 35.749556 400.945425 
 127.195222 35.749556 410.079469 
 127.195333 35.749556 413.870250 
 127.195444 35.749556 425.765163 
 127.195556 35.749556 429.047243 
 127.194222 35.749667 404.249174 
 127.194333 35.749667 386.773981 
 127.194444 35.749667 387.381993 
 127.194556 35.749667 397.890082 
 127.194667 35.749667 392.283940 
 127.194778 35.749667 386.138839 
 127.194889 35.749667 384.372275 
 127.195000 35.749667 389.043739 
 127.195111 35.749667 393.986969 
 127.195222 35.749667 409.108156 
 127.195333 35.749667 413.868038 
 127.195444 35.749667 426.040675 
 127.195556 35.749667 429.046892 
 127.194222 35.749778 400.543105 
 127.194333 35.749778 376.753059 
 127.194444 35.749778 376.973889 
 127.194556 35.749778 387.381715 
 127.194667 35.749778 384.372219 
 127.194778 35.749778 376.889707 
 127.194889 35.749778 379.820667 
 127.195000 35.749778 385.843836 
 127.195111 35.749778 389.042175 
 127.195222 35.749778 404.328011 
 127.195333 35.749778 409.846310 
 127.195444 35.749778 424.317967 
 127.195556 35.749778 427.734834 
 127.194333 35.749778 376.753059 
 127.194444 35.749778 376.973889 
 127.194556 35.749778 387.381715 
 127.194667 35.749778 384.372219 
 127.194778 35.749778 376.889707 
 127.194889 35.749778 379.820667 
 127.195000 35.749778 385.843836 
 127.195111 35.749778 389.042175 
 127.195222 35.749778 404.328011 
 127.195333 35.749778 409.846310 
 127.195444 35.749778 424.317967 
 127.195556 35.749778 427.734834 
 127.195667 35.749778 427.778545 
 127.194333 35.749889 369.182660 
 127.194444 35.749889 365.809855 
 127.194556 35.749889 365.275006 
 127.194667 35.749889 369.769000 
 127.194778 35.749889 365.299949 
 127.194889 35.749889 371.776348 
 127.195000 35.749889 380.829375 
 127.195111 35.749889 383.272054 
 127.195222 35.749889 396.067549 
 127.195333 35.749889 404.328504 
 127.195444 35.749889 419.404545 
 127.195556 35.749889 421.771543 
 127.195667 35.749889 425.751888 
 127.194333 35.750000 365.206264 
 127.194444 35.750000 357.251366 
 127.194556 35.750000 348.816550 
 127.194667 35.750000 356.685781 
 127.194778 35.750000 361.493964 
 127.194889 35.750000 368.126943 
 127.195000 35.750000 374.766216 
 127.195111 35.750000 377.003429 
 127.195222 35.750000 393.107404 
 127.195333 35.750000 398.955580 
 127.195444 35.750000 412.270593 
 127.195556 35.750000 414.712783 
 127.195667 35.750000 423.709892 
 127.194444 35.750000 357.251366 
 127.194556 35.750000 348.816550 
 127.194667 35.750000 356.685781 
 127.194778 35.750000 361.493964 
 127.194889 35.750000 368.126943 
 127.195000 35.750000 374.766216 
 127.195111 35.750000 377.003429 
 127.195222 35.750000 393.107404 
 127.195333 35.750000 398.955580 
 127.195444 35.750000 412.270593 
 127.195556 35.750000 414.712783 
 127.195667 35.750000 423.709892 
 127.195778 35.750000 425.789978 
 127.194444 35.750111 349.421622 
 127.194556 35.750111 344.257067 
 127.194667 35.750111 349.835293 
 127.194778 35.750111 356.796394 
 127.194889 35.750111 365.292182 
 127.195000 35.750111 372.677503 
 127.195111 35.750111 375.162608 
 127.195222 35.750111 391.193034 
 127.195333 35.750111 394.874188 
 127.195444 35.750111 407.231260 
 127.195556 35.750111 412.278863 
 127.195667 35.750111 423.548790 
 127.195778 35.750111 425.780106 
 127.194444 35.750222 345.558010 
 127.194556 35.750222 342.596081 
 127.194667 35.750222 345.948591 
 127.194778 35.750222 352.192481 
 127.194889 35.750222 361.493963 
 127.195000 35.750222 371.156373 
 127.195111 35.750222 372.647050 
 127.195222 35.750222 386.773720 
 127.195333 35.750222 392.071485 
 127.195444 35.750222 404.333948 
 127.195556 35.750222 409.391801 
 127.195667 35.750222 423.539255 
 127.195778 35.750222 425.751688 
 127.194556 35.750222 342.596081 
 127.194667 35.750222 345.948591 
 127.194778 35.750222 352.192481 
 127.194889 35.750222 361.493963 
 127.195000 35.750222 371.156373 
 127.195111 35.750222 372.647050 
 127.195222 35.750222 386.773720 
 127.195333 35.750222 392.071485 
 127.195444 35.750222 404.333948 
 127.195556 35.750222 409.391801 
 127.195667 35.750222 423.539255 
 127.195778 35.750222 425.751688 
 127.195889 35.750222 427.728330 
 127.194556 35.750333 342.661565 
 127.194667 35.750333 342.812007 
 127.194778 35.750333 347.241651 
 127.194889 35.750333 355.799868 
 127.195000 35.750333 366.199424 
 127.195111 35.750333 370.880373 
 127.195222 35.750333 379.991391 
 127.195333 35.750333 386.748990 
 127.195444 35.750333 398.978605 
 127.195556 35.750333 405.643759 
 127.195667 35.750333 421.785985 
 127.195778 35.750333 425.005288 
 127.195889 35.750333 427.734416 
 127.194556 35.750444 343.058163 
 127.194667 35.750444 341.337008 
 127.194778 35.750444 344.348639 
 127.194889 35.750444 351.101704 
 127.195000 35.750444 359.689526 
 127.195111 35.750444 369.154831 
 127.195222 35.750444 379.088917 
 127.195333 35.750444 383.139748 
 127.195444 35.750444 396.189907 
 127.195556 35.750444 400.939182 
 127.195667 35.750444 414.759128 
 127.195778 35.750444 420.184186 
 127.195889 35.750444 427.729604 
 127.194667 35.750444 341.337008 
 127.194778 35.750444 344.348639 
 127.194889 35.750444 351.101704 
 127.195000 35.750444 359.689526 
 127.195111 35.750444 369.154831 
 127.195222 35.750444 379.088917 
 127.195333 35.750444 383.139748 
 127.195444 35.750444 396.189907 
 127.195556 35.750444 400.939182 
 127.195667 35.750444 414.759128 
 127.195778 35.750444 420.184186 
 127.195889 35.750444 427.729604 
 127.196000 35.750444 427.734685 
 127.194667 35.750556 339.322259 
 127.194778 35.750556 339.321898 
 127.194889 35.750556 350.747383 
 127.195000 35.750556 356.713653 
 127.195111 35.750556 365.246114 
 127.195222 35.750556 376.990301 
 127.195333 35.750556 379.092300 
 127.195444 35.750556 393.133415 
 127.195556 35.750556 398.449306 
 127.195667 35.750556 407.245545 
 127.195778 35.750556 413.353939 
 127.195889 35.750556 425.741222 
 127.196000 35.750556 425.745667 
 127.194667 35.750667 332.545389 
 127.194778 35.750667 334.331293 
 127.194889 35.750667 348.878220 
 127.195000 35.750667 356.686269 
 127.195111 35.750667 361.014332 
 127.195222 35.750667 372.262138 
 127.195333 35.750667 372.719783 
 127.195444 35.750667 385.829195 
 127.195556 35.750667 393.974521 
 127.195667 35.750667 401.970421 
 127.195778 35.750667 405.872477 
 127.195889 35.750667 420.185134 
 127.196000 35.750667 421.783300 
 127.194778 35.750667 334.331293 
 127.194889 35.750667 348.878220 
 127.195000 35.750667 356.686269 
 127.195111 35.750667 361.014332 
 127.195222 35.750667 372.262138 
 127.195333 35.750667 372.719783 
 127.195444 35.750667 385.829195 
 127.195556 35.750667 393.974521 
 127.195667 35.750667 401.970421 
 127.195778 35.750667 405.872477 
 127.195889 35.750667 420.185134 
 127.196000 35.750667 421.783300 
 127.196111 35.750667 414.172804 
 127.194778 35.750778 332.669757 
 127.194889 35.750778 346.414659 
 127.195000 35.750778 349.419730 
 127.195111 35.750778 357.275734 
 127.195222 35.750778 368.743958 
 127.195333 35.750778 369.149548 
 127.195444 35.750778 379.431001 
 127.195556 35.750778 384.429252 
 127.195667 35.750778 399.864909 
 127.195778 35.750778 401.825032 
 127.195889 35.750778 408.436575 
 127.196000 35.750778 415.029094 
 127.196111 35.750778 413.352667 
 127.194778 35.750889 332.540327 
 127.194889 35.750889 342.443037 
 127.195000 35.750889 338.169663 
 127.195111 35.750889 349.835458 
 127.195222 35.750889 362.480756 
 127.195333 35.750889 365.107835 
 127.195444 35.750889 376.894827 
 127.195556 35.750889 379.352765 
 127.195667 35.750889 392.037287 
 127.195778 35.750889 397.818949 
 127.195889 35.750889 400.821966 
 127.196000 35.750889 409.762013 
 127.196111 35.750889 412.271260 
 127.194889 35.750889 342.443037 
 127.195000 35.750889 338.169663 
 127.195111 35.750889 349.835458 
 127.195222 35.750889 362.480756 
 127.195333 35.750889 365.107835 
 127.195444 35.750889 376.894827 
 127.195556 35.750889 379.352765 
 127.195667 35.750889 392.037287 
 127.195778 35.750889 397.818949 
 127.195889 35.750889 400.821966 
 127.196000 35.750889 409.762013 
 127.196111 35.750889 412.271260 
 127.196222 35.750889 404.205901 
 127.194889 35.751000 335.059477 
 127.195000 35.751000 332.566427 
 127.195111 35.751000 348.879518 
 127.195222 35.751000 353.832413 
 127.195333 35.751000 359.899866 
 127.195444 35.751000 375.079656 
 127.195556 35.751000 379.100253 
 127.195667 35.751000 384.802205 
 127.195778 35.751000 393.829744 
 127.195889 35.751000 395.016729 
 127.196000 35.751000 402.770835 
 127.196111 35.751000 410.576244 
 127.196222 35.751000 401.822007 
 127.194889 35.751111 333.502102 
 127.195000 35.751111 332.721145 
 127.195111 35.751111 343.867835 
 127.195222 35.751111 349.420503 
 127.195333 35.751111 354.383824 
 127.195444 35.751111 368.489857 
 127.195556 35.751111 376.884922 
 127.195667 35.751111 376.971483 
 127.195778 35.751111 386.774444 
 127.195889 35.751111 389.043205 
 127.196000 35.751111 389.595046 
 127.196111 35.751111 399.488437 
 127.196222 35.751111 396.070546 
 127.195000 35.751111 332.721145 
 127.195111 35.751111 343.867835 
 127.195222 35.751111 349.420503 
 127.195333 35.751111 354.383824 
 127.195444 35.751111 368.489857 
 127.195556 35.751111 376.884922 
 127.195667 35.751111 376.971483 
 127.195778 35.751111 386.774444 
 127.195889 35.751111 389.043205 
 127.196000 35.751111 389.595046 
 127.196111 35.751111 399.488437 
 127.196222 35.751111 396.070546 
 127.196333 35.751111 396.188370 
 127.195000 35.751222 332.476330 
 127.195111 35.751222 332.453949 
 127.195222 35.751222 342.791540 
 127.195333 35.751222 349.835498 
 127.195444 35.751222 353.855950 
 127.195556 35.751222 364.537598 
 127.195667 35.751222 372.062136 
 127.195778 35.751222 379.785890 
 127.195889 35.751222 379.992009 
 127.196000 35.751222 379.384483 
 127.196111 35.751222 383.271418 
 127.196222 35.751222 387.439146 
 127.196333 35.751222 385.801593 
 127.195000 35.751333 330.590920 
 127.195111 35.751333 328.922199 
 127.195222 35.751333 333.156614 
 127.195333 35.751333 344.940601 
 127.195444 35.751333 348.952329 
 127.195556 35.751333 348.794915 
 127.195667 35.751333 362.010754 
 127.195778 35.751333 368.123329 
 127.195889 35.751333 368.733196 
 127.196000 35.751333 372.261553 
 127.196111 35.751333 370.881773 
 127.196222 35.751333 374.805758 
 127.196333 35.751333 371.789797 
 127.195111 35.751333 328.922199 
 127.195222 35.751333 333.156614 
 127.195333 35.751333 344.940601 
 127.195444 35.751333 348.952329 
 127.195556 35.751333 348.794915 
 127.195667 35.751333 362.010754 
 127.195778 35.751333 368.123329 
 127.195889 35.751333 368.733196 
 127.196000 35.751333 372.261553 
 127.196111 35.751333 370.881773 
 127.196222 35.751333 374.805758 
 127.196333 35.751333 371.789797 
 127.196444 35.751333 364.932962 
 127.195111 35.751444 327.921655 
 127.195222 35.751444 324.501977 
 127.195333 35.751444 334.510975 
 127.195444 35.751444 345.542222 
 127.195556 35.751444 341.257993 
 127.195667 35.751444 351.145717 
 127.195778 35.751444 349.835490 
 127.195889 35.751444 352.183774 
 127.196000 35.751444 362.013553 
 127.196111 35.751444 362.853743 
 127.196222 35.751444 367.518604 
 127.196333 35.751444 365.109842 
 127.196444 35.751444 362.003598 
 127.195111 35.751556 324.891685 
 127.195222 35.751556 315.058003 
 127.195333 35.751556 321.859949 
 127.195444 35.751556 336.150238 
 127.195556 35.751556 335.937421 
 127.195667 35.751556 338.671530 
 127.195778 35.751556 335.198643 
 127.195889 35.751556 341.130197 
 127.196000 35.751556 344.771786 
 127.196111 35.751556 354.404001 
 127.196222 35.751556 362.081211 
 127.196333 35.751556 361.830840 
 127.196444 35.751556 358.047693 
 127.195222 35.751556 315.058003 
 127.195333 35.751556 321.859949 
 127.195444 35.751556 336.150238 
 127.195556 35.751556 335.937421 
 127.195667 35.751556 338.671530 
 127.195778 35.751556 335.198643 
 127.195889 35.751556 341.130197 
 127.196000 35.751556 344.771786 
 127.196111 35.751556 354.404001 
 127.196222 35.751556 362.081211 
 127.196333 35.751556 361.830840 
 127.196444 35.751556 358.047693 
 127.196556 35.751556 343.059442 
 127.195222 35.751667 309.471145 
 127.195333 35.751667 311.804501 
 127.195444 35.751667 319.644578 
 127.195556 35.751667 327.277959 
 127.195667 35.751667 324.814850 
 127.195778 35.751667 324.637278 
 127.195889 35.751667 334.502661 
 127.196000 35.751667 334.532399 
 127.196111 35.751667 342.588346 
 127.196222 35.751667 351.146153 
 127.196333 35.751667 352.176149 
 127.196444 35.751667 351.326756 
 127.196556 35.751667 337.562131 
 127.195222 35.751778 305.761973 
 127.195333 35.751778 308.291790 
 127.195444 35.751778 308.515651 
 127.195556 35.751778 314.497231 
 127.195667 35.751778 311.814012 
 127.195778 35.751778 313.603724 
 127.195889 35.751778 325.198040 
 127.196000 35.751778 329.723921 
 127.196111 35.751778 333.896110 
 127.196222 35.751778 334.331117 
 127.196333 35.751778 338.190296 
 127.196444 35.751778 340.134899 
 127.196556 35.751778 335.198990 
 127.195333 35.751778 308.291790 
 127.195444 35.751778 308.515651 
 127.195556 35.751778 314.497231 
 127.195667 35.751778 311.814012 
 127.195778 35.751778 313.603724 
 127.195889 35.751778 325.198040 
 127.196000 35.751778 329.723921 
 127.196111 35.751778 333.896110 
 127.196222 35.751778 334.331117 
 127.196333 35.751778 338.190296 
 127.196444 35.751778 340.134899 
 127.196556 35.751778 335.198990 
 127.196667 35.751778 334.347687 
 127.195333 35.751889 307.208863 
 127.195444 35.751889 306.863769 
 127.195556 35.751889 307.094149 
 127.195667 35.751889 302.457400 
 127.195778 35.751889 304.433297 
 127.195889 35.751889 313.542781 
 127.196000 35.751889 323.164364 
 127.196111 35.751889 325.731453 
 127.196222 35.751889 326.777163 
 127.196333 35.751889 328.158724 
 127.196444 35.751889 332.480431 
 127.196556 35.751889 330.528087 
 127.196667 35.751889 329.554044 
 127.195333 35.752000 306.863623 
 127.195444 35.752000 304.905838 
 127.195556 35.752000 301.614623 
 127.195667 35.752000 296.252940 
 127.195778 35.752000 298.445489 
 127.195889 35.752000 303.684026 
 127.196000 35.752000 315.192901 
 127.196111 35.752000 317.773614 
 127.196222 35.752000 323.266965 
 127.196333 35.752000 325.635132 
 127.196444 35.752000 323.740857 
 127.196556 35.752000 323.721649 
 127.196667 35.752000 319.733962 
 127.195444 35.752000 304.905838 
 127.195556 35.752000 301.614623 
 127.195667 35.752000 296.252940 
 127.195778 35.752000 298.445489 
 127.195889 35.752000 303.684026 
 127.196000 35.752000 315.192901 
 127.196111 35.752000 317.773614 
 127.196222 35.752000 323.266965 
 127.196333 35.752000 325.635132 
 127.196444 35.752000 323.740857 
 127.196556 35.752000 323.721649 
 127.196667 35.752000 319.733962 
 127.196778 35.752000 304.433761 
 127.195444 35.752111 303.750348 
 127.195556 35.752111 293.844028 
 127.195667 35.752111 288.654283 
 127.195778 35.752111 293.848825 
 127.195889 35.752111 298.097949 
 127.196000 35.752111 311.108106 
 127.196111 35.752111 313.334034 
 127.196222 35.752111 321.312008 
 127.196333 35.752111 324.296702 
 127.196444 35.752111 313.268747 
 127.196556 35.752111 311.259237 
 127.196667 35.752111 308.833726 
 127.196778 35.752111 300.696736 
 127.195444 35.752222 298.462056 
 127.195556 35.752222 284.319911 
 127.195667 35.752222 282.794292 
 127.195778 35.752222 289.185480 
 127.195889 35.752222 293.863323 
 127.196000 35.752222 308.515516 
 127.196111 35.752222 311.116366 
 127.196222 35.752222 315.589192 
 127.196333 35.752222 319.728055 
 127.196444 35.752222 306.634048 
 127.196556 35.752222 303.764168 
 127.196667 35.752222 301.621992 
 127.196778 35.752222 298.461860 
 127.195556 35.752222 284.319911 
 127.195667 35.752222 282.794292 
 127.195778 35.752222 289.185480 
 127.195889 35.752222 293.863323 
 127.196000 35.752222 308.515516 
 127.196111 35.752222 311.116366 
 127.196222 35.752222 315.589192 
 127.196333 35.752222 319.728055 
 127.196444 35.752222 306.634048 
 127.196556 35.752222 303.764168 
 127.196667 35.752222 301.621992 
 127.196778 35.752222 298.461860 
 127.196889 35.752222 298.096565 
 127.195556 35.752333 277.674417 
 127.195667 35.752333 277.629078 
 127.195778 35.752333 287.260614 
 127.195889 35.752333 292.017231 
 127.196000 35.752333 307.027041 
 127.196111 35.752333 312.463439 
 127.196222 35.752333 313.524442 
 127.196333 35.752333 313.824784 
 127.196444 35.752333 303.464998 
 127.196556 35.752333 299.395043 
 127.196667 35.752333 298.444306 
 127.196778 35.752333 298.096895 
 127.196889 35.752333 297.616549 
 127.195556 35.752445 275.118453 
 127.195667 35.752445 277.559034 
 127.195778 35.752445 286.378586 
 127.195889 35.752445 291.124332 
 127.196000 35.752445 303.284658 
 127.196111 35.752445 311.808815 
 127.196222 35.752445 314.009786 
 127.196333 35.752445 313.258176 
 127.196444 35.752445 305.305793 
 127.196556 35.752445 299.986360 
 127.196667 35.752445 298.140577 
 127.196778 35.752445 296.487787 
 127.196889 35.752445 293.598594 
 127.195667 35.752445 277.559034 
 127.195778 35.752445 286.378586 
 127.195889 35.752445 291.124332 
 127.196000 35.752445 303.284658 
 127.196111 35.752445 311.808815 
 127.196222 35.752445 314.009786 
 127.196333 35.752445 313.258176 
 127.196444 35.752445 305.305793 
 127.196556 35.752445 299.986360 
 127.196667 35.752445 298.140577 
 127.196778 35.752445 296.487787 
 127.196889 35.752445 293.598594 
 127.197000 35.752445 280.384180 
 127.195667 35.752556 277.845606 
 127.195778 35.752556 287.909362 
 127.195889 35.752556 291.913976 
 127.196000 35.752556 298.144647 
 127.196111 35.752556 311.113930 
 127.196222 35.752556 313.533809 
 127.196333 35.752556 313.263430 
 127.196444 35.752556 309.734047 
 127.196556 35.752556 303.352950 
 127.196667 35.752556 297.536334 
 127.196778 35.752556 292.783628 
 127.196889 35.752556 287.066875 
 127.197000 35.752556 275.937412 
 127.195667 35.752667 279.014132 
 127.195778 35.752667 289.344429 
 127.195889 35.752667 293.439883 
 127.196000 35.752667 296.882124 
 127.196111 35.752667 311.808874 
 127.196222 35.752667 314.509360 
 127.196333 35.752667 313.257718 
 127.196444 35.752667 309.403944 
 127.196556 35.752667 307.225064 
 127.196667 35.752667 295.356090 
 127.196778 35.752667 287.344163 
 127.196889 35.752667 283.076765 
 127.197000 35.752667 274.290187 
 127.195778 35.752667 289.344429 
 127.195889 35.752667 293.439883 
 127.196000 35.752667 296.882124 
 127.196111 35.752667 311.808874 
 127.196222 35.752667 314.509360 
 127.196333 35.752667 313.257718 
 127.196444 35.752667 309.403944 
 127.196556 35.752667 307.225064 
 127.196667 35.752667 295.356090 
 127.196778 35.752667 287.344163 
 127.196889 35.752667 283.076765 
 127.197000 35.752667 274.290187 
 127.197111 35.752667 273.082600 
 127.195778 35.752778 292.697726 
 127.195889 35.752778 293.849337 
 127.196000 35.752778 297.243684 
 127.196111 35.752778 312.478004 
 127.196222 35.752778 313.271705 
 127.196333 35.752778 313.252386 
 127.196444 35.752778 308.515886 
 127.196556 35.752778 306.987149 
 127.196667 35.752778 294.682407 
 127.196778 35.752778 285.758720 
 127.196889 35.752778 281.319539 
 127.197000 35.752778 274.836266 
 127.197111 35.752778 272.654757 
 127.195778 35.752889 293.626179 
 127.195889 35.752889 294.669325 
 127.196000 35.752889 298.096691 
 127.196111 35.752889 311.154777 
 127.196222 35.752889 313.271134 
 127.196333 35.752889 313.255142 
 127.196444 35.752889 308.503399 
 127.196556 35.752889 305.732187 
 127.196667 35.752889 293.610336 
 127.196778 35.752889 285.026324 
 127.196889 35.752889 279.778072 
 127.197000 35.752889 272.914612 
 127.197111 35.752889 269.735241 
 127.195889 35.752889 294.669325 
 127.196000 35.752889 298.096691 
 127.196111 35.752889 311.154777 
 127.196222 35.752889 313.271134 
 127.196333 35.752889 313.255142 
 127.196444 35.752889 308.503399 
 127.196556 35.752889 305.732187 
 127.196667 35.752889 293.610336 
 127.196778 35.752889 285.026324 
 127.196889 35.752889 279.778072 
 127.197000 35.752889 272.914612 
 127.197111 35.752889 269.735241 
 127.197222 35.752889 262.342076 
 127.195889 35.753000 295.351655 
 127.196000 35.753000 298.445613 
 127.196111 35.753000 308.922041 
 127.196222 35.753000 313.251901 
 127.196333 35.753000 313.538447 
 127.196444 35.753000 305.858550 
 127.196556 35.753000 304.852888 
 127.196667 35.753000 290.697347 
 127.196778 35.753000 285.836695 
 127.196889 35.753000 277.633830 
 127.197000 35.753000 269.502583 
 127.197111 35.753000 263.987440 
 127.197222 35.753000 258.586953 
 127.195889 35.753111 296.494996 
 127.196000 35.753111 298.444375 
 127.196111 35.753111 304.433585 
 127.196222 35.753111 308.438765 
 127.196333 35.753111 308.822778 
 127.196444 35.753111 304.853801 
 127.196556 35.753111 303.580550 
 127.196667 35.753111 289.498013 
 127.196778 35.753111 286.208938 
 127.196889 35.753111 275.120131 
 127.197000 35.753111 265.235142 
 127.197111 35.753111 260.145415 
 127.197222 35.753111 256.110448 
 127.196000 35.753111 298.444375 
 127.196111 35.753111 304.433585 
 127.196222 35.753111 308.438765 
 127.196333 35.753111 308.822778 
 127.196444 35.753111 304.853801 
 127.196556 35.753111 303.580550 
 127.196667 35.753111 289.498013 
 127.196778 35.753111 286.208938 
 127.196889 35.753111 275.120131 
 127.197000 35.753111 265.235142 
 127.197111 35.753111 260.145415 
 127.197222 35.753111 256.110448 
 127.197333 35.753111 250.209104 
 127.196000 35.753222 298.097288 
 127.196111 35.753222 298.481288 
 127.196222 35.753222 298.447483 
 127.196333 35.753222 298.127059 
 127.196444 35.753222 300.822200 
 127.196556 35.753222 298.096602 
 127.196667 35.753222 287.154127 
 127.196778 35.753222 285.033491 
 127.196889 35.753222 272.884310 
 127.197000 35.753222 262.185404 
 127.197111 35.753222 258.687563 
 127.197222 35.753222 254.975801 
 127.197333 35.753222 247.182856 
 127.196000 35.753333 298.143202 
 127.196111 35.753333 294.690692 
 127.196222 35.753333 293.145203 
 127.196333 35.753333 293.604612 
 127.196444 35.753333 294.663418 
 127.196556 35.753333 287.348460 
 127.196667 35.753333 283.101959 
 127.196778 35.753333 277.570163 
 127.196889 35.753333 268.697376 
 127.197000 35.753333 262.373854 
 127.197111 35.753333 258.616365 
 127.197222 35.753333 252.436839 
 127.197333 35.753333 245.999677 
 127.196000 35.753445 296.490082 
 127.196111 35.753445 292.827598 
 127.196222 35.753445 291.222583 
 127.196333 35.753445 292.754069 
 127.196444 35.753445 291.277852 
 127.196556 35.753445 280.187704 
 127.196667 35.753445 278.527032 
 127.196778 35.753445 269.502743 
 127.196889 35.753445 263.590311 
 127.197000 35.753445 260.917751 
 127.197111 35.753445 256.949321 
 127.197222 35.753445 250.209080 
 127.197333 35.753445 244.248320 
 127.196111 35.753445 292.827598 
 127.196222 35.753445 291.222583 
 127.196333 35.753445 292.754069 
 127.196444 35.753445 291.277852 
 127.196556 35.753445 280.187704 
 127.196667 35.753445 278.527032 
 127.196778 35.753445 269.502743 
 127.196889 35.753445 263.590311 
 127.197000 35.753445 260.917751 
 127.197111 35.753445 256.949321 
 127.197222 35.753445 250.209080 
 127.197333 35.753445 244.248320 
 127.197444 35.753445 240.639187 
 127.196111 35.753556 291.937782 
 127.196222 35.753556 290.682562 
 127.196333 35.753556 289.370280 
 127.196444 35.753556 288.325500 
 127.196556 35.753556 278.528536 
 127.196667 35.753556 275.995208 
 127.196778 35.753556 266.384581 
 127.196889 35.753556 262.187112 
 127.197000 35.753556 258.829358 
 127.197111 35.753556 254.147947 
 127.197222 35.753556 245.928893 
 127.197333 35.753556 241.697816 
 127.197444 35.753556 236.969955 
 127.196111 35.753667 291.216312 
 127.196222 35.753667 289.264452 
 127.196333 35.753667 286.334859 
 127.196444 35.753667 284.199166 
 127.196556 35.753667 277.643053 
 127.196667 35.753667 275.352496 
 127.196778 35.753667 264.656682 
 127.196889 35.753667 261.030388 
 127.197000 35.753667 253.411624 
 127.197111 35.753667 249.424023 
 127.197222 35.753667 241.187489 
 127.197333 35.753667 237.761607 
 127.197444 35.753667 236.615748 
 127.196222 35.753667 289.264452 
 127.196333 35.753667 286.334859 
 127.196444 35.753667 284.199166 
 127.196556 35.753667 277.643053 
 127.196667 35.753667 275.352496 
 127.196778 35.753667 264.656682 
 127.196889 35.753667 261.030388 
 127.197000 35.753667 253.411624 
 127.197111 35.753667 249.424023 
 127.197222 35.753667 241.187489 
 127.197333 35.753667 237.761607 
 127.197444 35.753667 236.615748 
 127.197556 35.753667 233.086873 
 127.196222 35.753778 287.344034 
 127.196333 35.753778 283.486591 
 127.196444 35.753778 280.714926 
 127.196556 35.753778 275.997474 
 127.196667 35.753778 274.835938 
 127.196778 35.753778 262.681365 
 127.196889 35.753778 258.539475 
 127.197000 35.753778 250.855048 
 127.197111 35.753778 247.215186 
 127.197222 35.753778 236.514574 
 127.197333 35.753778 236.635093 
 127.197444 35.753778 233.103606 
 127.197556 35.753778 231.645738 
 127.196222 35.753889 285.836558 
 127.196333 35.753889 282.666801 
 127.196444 35.753889 280.457482 
 127.196556 35.753889 274.734580 
 127.196667 35.753889 271.105334 
 127.196778 35.753889 262.022019 
 127.196889 35.753889 256.949068 
 127.197000 35.753889 250.034793 
 127.197111 35.753889 245.464393 
 127.197222 35.753889 236.966727 
 127.197333 35.753889 233.643315 
 127.197444 35.753889 230.785744 
 127.197556 35.753889 230.429604 
 127.196333 35.753889 282.666801 
 127.196444 35.753889 280.457482 
 127.196556 35.753889 274.734580 
 127.196667 35.753889 271.105334 
 127.196778 35.753889 262.022019 
 127.196889 35.753889 256.949068 
 127.197000 35.753889 250.034793 
 127.197111 35.753889 245.464393 
 127.197222 35.753889 236.966727 
 127.197333 35.753889 233.643315 
 127.197444 35.753889 230.785744 
 127.197556 35.753889 230.429604 
 127.197667 35.753889 230.569294 
 127.196333 35.754000 281.240437 
 127.196444 35.754000 277.628630 
 127.196556 35.754000 272.854661 
 127.196667 35.754000 270.450353 
 127.196778 35.754000 258.642973 
 127.196889 35.754000 256.113564 
 127.197000 35.754000 248.999542 
 127.197111 35.754000 242.666457 
 127.197222 35.754000 235.020529 
 127.197333 35.754000 231.146818 
 127.197444 35.754000 224.554827 
 127.197556 35.754000 227.256080 
 127.197667 35.754000 228.276353 
 127.196333 35.754111 280.193792 
 127.196444 35.754111 275.979170 
 127.196556 35.754111 272.020223 
 127.196667 35.754111 269.502974 
 127.196778 35.754111 259.369324 
 127.196889 35.754111 255.350610 
 127.197000 35.754111 245.929138 
 127.197111 35.754111 238.237993 
 127.197222 35.754111 232.429340 
 127.197333 35.754111 227.886273 
 127.197444 35.754111 220.702310 
 127.197556 35.754111 224.530239 
 127.197667 35.754111 228.729742 
 127.196444 35.754111 275.979170 
 127.196556 35.754111 272.020223 
 127.196667 35.754111 269.502974 
 127.196778 35.754111 259.369324 
 127.196889 35.754111 255.350610 
 127.197000 35.754111 245.929138 
 127.197111 35.754111 238.237993 
 127.197222 35.754111 232.429340 
 127.197333 35.754111 227.886273 
 127.197444 35.754111 220.702310 
 127.197556 35.754111 224.530239 
 127.197667 35.754111 228.729742 
 127.197778 35.754111 223.065413 
 127.196444 35.754222 274.835620 
 127.196556 35.754222 272.872236 
 127.196667 35.754222 269.651082 
 127.196778 35.754222 259.336540 
 127.196889 35.754222 253.399168 
 127.197000 35.754222 242.777432 
 127.197111 35.754222 236.557554 
 127.197222 35.754222 233.083658 
 127.197333 35.754222 223.895538 
 127.197444 35.754222 218.281207 
 127.197556 35.754222 222.220613 
 127.197667 35.754222 224.471621 
 127.197778 35.754222 222.053487 
 127.196444 35.754333 273.089165 
 127.196556 35.754333 271.086214 
 127.196667 35.754333 266.995866 
 127.196778 35.754333 258.579419 
 127.196889 35.754333 248.842035 
 127.197000 35.754333 241.697798 
 127.197111 35.754333 234.948094 
 127.197222 35.754333 232.734195 
 127.197333 35.754333 222.059460 
 127.197444 35.754333 218.224452 
 127.197556 35.754333 218.281052 
 127.197667 35.754333 220.674655 
 127.197778 35.754333 221.068562 
 127.196556 35.754333 271.086214 
 127.196667 35.754333 266.995866 
 127.196778 35.754333 258.579419 
 127.196889 35.754333 248.842035 
 127.197000 35.754333 241.697798 
 127.197111 35.754333 234.948094 
 127.197222 35.754333 232.734195 
 127.197333 35.754333 222.059460 
 127.197444 35.754333 218.224452 
 127.197556 35.754333 218.281052 
 127.197667 35.754333 220.674655 
 127.197778 35.754333 221.068562 
 127.197889 35.754333 220.834698 
 127.196556 35.754444 269.502613 
 127.196667 35.754444 262.184280 
 127.196778 35.754444 256.113662 
 127.196889 35.754444 245.929132 
 127.197000 35.754444 242.201787 
 127.197111 35.754444 232.430443 
 127.197222 35.754444 230.421369 
 127.197333 35.754444 220.682973 
 127.197444 35.754444 217.679947 
 127.197556 35.754444 214.525430 
 127.197667 35.754444 215.644152 
 127.197778 35.754444 220.042932 
 127.197889 35.754444 220.630909 
 127.196556 35.754555 266.888108 
 127.196667 35.754555 260.005487 
 127.196778 35.754555 255.061962 
 127.196889 35.754555 245.486129 
 127.197000 35.754555 241.750152 
 127.197111 35.754555 234.176768 
 127.197222 35.754555 227.868749 
 127.197333 35.754555 220.027331 
 127.197444 35.754555 217.007431 
 127.197556 35.754555 210.335553 
 127.197667 35.754555 210.696743 
 127.197778 35.754555 218.242144 
 127.197889 35.754555 219.477611 
 127.196667 35.754555 260.005487 
 127.196778 35.754555 255.061962 
 127.196889 35.754555 245.486129 
 127.197000 35.754555 241.750152 
 127.197111 35.754555 234.176768 
 127.197222 35.754555 227.868749 
 127.197333 35.754555 220.027331 
 127.197444 35.754555 217.007431 
 127.197556 35.754555 210.335553 
 127.197667 35.754555 210.696743 
 127.197778 35.754555 218.242144 
 127.197889 35.754555 219.477611 
 127.198000 35.754555 216.078718 
 127.196667 35.754667 258.685897 
 127.196778 35.754667 254.629522 
 127.196889 35.754667 245.972217 
 127.197000 35.754667 241.155971 
 127.197111 35.754667 231.149941 
 127.197222 35.754667 228.623062 
 127.197333 35.754667 218.327432 
 127.197444 35.754667 215.970673 
 127.197556 35.754667 207.631458 
 127.197667 35.754667 209.066147 
 127.197778 35.754667 216.388772 
 127.197889 35.754667 216.947723 
 127.198000 35.754667 215.673791 
 127.196667 35.754778 258.800431 
 127.196778 35.754778 253.694985 
 127.196889 35.754778 241.647623 
 127.197000 35.754778 237.026967 
 127.197111 35.754778 230.421222 
 127.197222 35.754778 226.622467 
 127.197333 35.754778 217.021879 
 127.197444 35.754778 212.562727 
 127.197556 35.754778 205.208849 
 127.197667 35.754778 208.324688 
 127.197778 35.754778 213.536785 
 127.197889 35.754778 215.970454 
 127.198000 35.754778 215.637295 
 127.196778 35.754778 253.694985 
 127.196889 35.754778 241.647623 
 127.197000 35.754778 237.026967 
 127.197111 35.754778 230.421222 
 127.197222 35.754778 226.622467 
 127.197333 35.754778 217.021879 
 127.197444 35.754778 212.562727 
 127.197556 35.754778 205.208849 
 127.197667 35.754778 208.324688 
 127.197778 35.754778 213.536785 
 127.197889 35.754778 215.970454 
 127.198000 35.754778 215.637295 
 127.198111 35.754778 216.142654 
 127.196778 35.754889 248.816768 
 127.196889 35.754889 236.659524 
 127.197000 35.754889 234.103025 
 127.197111 35.754889 227.586828 
 127.197222 35.754889 223.241086 
 127.197333 35.754889 211.968348 
 127.197444 35.754889 207.449412 
 127.197556 35.754889 202.886627 
 127.197667 35.754889 203.477295 
 127.197778 35.754889 209.122783 
 127.197889 35.754889 214.525482 
 127.198000 35.754889 215.637197 
 127.198111 35.754889 217.244913 
 127.196778 35.755000 240.255123 
 127.196889 35.755000 230.846036 
 127.197000 35.755000 230.421238 
 127.197111 35.755000 223.427591 
 127.197222 35.755000 220.018943 
 127.197333 35.755000 207.702091 
 127.197444 35.755000 203.496682 
 127.197556 35.755000 202.014245 
 127.197667 35.755000 200.758043 
 127.197778 35.755000 203.713195 
 127.197889 35.755000 213.902522 
 127.198000 35.755000 215.635650 
 127.198111 35.755000 220.629323 
 127.196889 35.755000 230.846036 
 127.197000 35.755000 230.421238 
 127.197111 35.755000 223.427591 
 127.197222 35.755000 220.018943 
 127.197333 35.755000 207.702091 
 127.197444 35.755000 203.496682 
 127.197556 35.755000 202.014245 
 127.197667 35.755000 200.758043 
 127.197778 35.755000 203.713195 
 127.197889 35.755000 213.902522 
 127.198000 35.755000 215.635650 
 127.198111 35.755000 220.629323 
 127.198222 35.755000 224.755876 
 127.196889 35.755111 230.421867 
 127.197000 35.755111 227.256418 
 127.197111 35.755111 220.021458 
 127.197222 35.755111 217.362324 
 127.197333 35.755111 204.664734 
 127.197444 35.755111 202.209353 
 127.197556 35.755111 200.413033 
 127.197667 35.755111 198.505691 
 127.197778 35.755111 202.012460 
 127.197889 35.755111 210.797750 
 127.198000 35.755111 214.525172 
 127.198111 35.755111 221.254392 
 127.198222 35.755111 226.616952 
 127.196889 35.755222 230.020552 
 127.197000 35.755222 222.373833 
 127.197111 35.755222 214.527701 
 127.197222 35.755222 212.562800 
 127.197333 35.755222 203.483825 
 127.197444 35.755222 201.691113 
 127.197556 35.755222 199.482915 
 127.197667 35.755222 197.937354 
 127.197778 35.755222 200.517463 
 127.197889 35.755222 209.142239 
 127.198000 35.755222 213.910064 
 127.198111 35.755222 222.221725 
 127.198222 35.755222 226.625159 
 127.197000 35.755222 222.373833 
 127.197111 35.755222 214.527701 
 127.197222 35.755222 212.562800 
 127.197333 35.755222 203.483825 
 127.197444 35.755222 201.691113 
 127.197556 35.755222 199.482915 
 127.197667 35.755222 197.937354 
 127.197778 35.755222 200.517463 
 127.197889 35.755222 209.142239 
 127.198000 35.755222 213.910064 
 127.198111 35.755222 222.221725 
 127.198222 35.755222 226.625159 
 127.198333 35.755222 227.006413 
 127.197000 35.755333 215.970539 
 127.197111 35.755333 210.335539 
 127.197222 35.755333 208.338502 
 127.197333 35.755333 201.708284 
 127.197444 35.755333 201.779582 
 127.197556 35.755333 197.952043 
 127.197667 35.755333 197.907849 
 127.197778 35.755333 200.531168 
 127.197889 35.755333 207.550333 
 127.198000 35.755333 210.672011 
 127.198111 35.755333 222.205183 
 127.198222 35.755333 226.621563 
 127.198333 35.755333 227.005841 
 127.197000 35.755444 210.663784 
 127.197111 35.755444 209.142321 
 127.197222 35.755444 202.210680 
 127.197333 35.755444 201.840686 
 127.197444 35.755444 199.487819 
 127.197556 35.755444 196.812571 
 127.197667 35.755444 197.917274 
 127.197778 35.755444 200.790174 
 127.197889 35.755444 208.131161 
 127.198000 35.755444 210.765063 
 127.198111 35.755444 221.340883 
 127.198222 35.755444 226.078540 
 127.198333 35.755444 226.651784 
 127.197111 35.755444 209.142321 
 127.197222 35.755444 202.210680 
 127.197333 35.755444 201.840686 
 127.197444 35.755444 199.487819 
 127.197556 35.755444 196.812571 
 127.197667 35.755444 197.917274 
 127.197778 35.755444 200.790174 
 127.197889 35.755444 208.131161 
 127.198000 35.755444 210.765063 
 127.198111 35.755444 221.340883 
 127.198222 35.755444 226.078540 
 127.198333 35.755444 226.651784 
 127.198444 35.755444 228.280295 
 127.197111 35.755555 207.600649 
 127.197222 35.755555 199.485911 
 127.197333 35.755555 196.894187 
 127.197444 35.755555 194.040850 
 127.197556 35.755555 194.040643 
 127.197667 35.755555 197.568799 
 127.197778 35.755555 200.517031 
 127.197889 35.755555 205.264336 
 127.198000 35.755555 210.335536 
 127.198111 35.755555 220.019116 
 127.198222 35.755555 223.903070 
 127.198333 35.755555 225.539934 
 127.198444 35.755555 230.814167 
 127.197111 35.755667 204.908352 
 127.197222 35.755667 194.025147 
 127.197333 35.755667 191.857428 
 127.197444 35.755667 189.725753 
 127.197556 35.755667 190.777866 
 127.197667 35.755667 196.813940 
 127.197778 35.755667 200.479229 
 127.197889 35.755667 204.673157 
 127.198000 35.755667 210.335860 
 127.198111 35.755667 216.996177 
 127.198222 35.755667 222.224198 
 127.198333 35.755667 223.892532 
 127.198444 35.755667 231.626729 
 127.197222 35.755667 194.025147 
 127.197333 35.755667 191.857428 
 127.197444 35.755667 189.725753 
 127.197556 35.755667 190.777866 
 127.197667 35.755667 196.813940 
 127.197778 35.755667 200.479229 
 127.197889 35.755667 204.673157 
 127.198000 35.755667 210.335860 
 127.198111 35.755667 216.996177 
 127.198222 35.755667 222.224198 
 127.198333 35.755667 223.892532 
 127.198444 35.755667 231.626729 
 127.198556 35.755667 237.728476 
 127.197222 35.755778 188.733261 
 127.197333 35.755778 188.953689 
 127.197444 35.755778 186.104872 
 127.197556 35.755778 187.885944 
 127.197667 35.755778 196.047705 
 127.197778 35.755778 199.487619 
 127.197889 35.755778 205.717630 
 127.198000 35.755778 211.419716 
 127.198111 35.755778 215.637543 
 127.198222 35.755778 220.698330 
 127.198333 35.755778 224.243757 
 127.198444 35.755778 232.370188 
 127.198556 35.755778 237.743533 
 127.197222 35.755889 187.836117 
 127.197333 35.755889 187.167207 
 127.197444 35.755889 185.384175 
 127.197556 35.755889 187.161823 
 127.197667 35.755889 194.697402 
 127.197778 35.755889 198.062612 
 127.197889 35.755889 205.752322 
 127.198000 35.755889 211.974921 
 127.198111 35.755889 214.521661 
 127.198222 35.755889 220.600239 
 127.198333 35.755889 224.148791 
 127.198444 35.755889 233.155258 
 127.198556 35.755889 237.743809 
 127.197333 35.755889 187.167207 
 127.197444 35.755889 185.384175 
 127.197556 35.755889 187.161823 
 127.197667 35.755889 194.697402 
 127.197778 35.755889 198.062612 
 127.197889 35.755889 205.752322 
 127.198000 35.755889 211.974921 
 127.198111 35.755889 214.521661 
 127.198222 35.755889 220.600239 
 127.198333 35.755889 224.148791 
 127.198444 35.755889 233.155258 
 127.198556 35.755889 237.743809 
 127.198667 35.755889 238.239327 
 127.197333 35.756000 186.350001 
 127.197444 35.756000 185.380359 
 127.197556 35.756000 186.624117 
 127.197667 35.756000 191.868239 
 127.197778 35.756000 196.814246 
 127.197889 35.756000 204.698287 
 127.198000 35.756000 210.771846 
 127.198111 35.756000 214.382300 
 127.198222 35.756000 218.242895 
 127.198333 35.756000 224.241712 
 127.198444 35.756000 233.401976 
 127.198556 35.756000 237.745515 
 127.198667 35.756000 239.033594 
 127.197333 35.756111 186.107107 
 127.197444 35.756111 185.383275 
 127.197556 35.756111 187.165257 
 127.197667 35.756111 190.541912 
 127.197778 35.756111 195.002824 
 127.197889 35.756111 205.725493 
 127.198000 35.756111 209.264683 
 127.198111 35.756111 213.924930 
 127.198222 35.756111 218.232618 
 127.198333 35.756111 223.891044 
 127.198444 35.756111 235.126105 
 127.198556 35.756111 237.743880 
 127.198667 35.756111 239.698150 
 127.197444 35.756111 185.383275 
 127.197556 35.756111 187.165257 
 127.197667 35.756111 190.541912 
 127.197778 35.756111 195.002824 
 127.197889 35.756111 205.725493 
 127.198000 35.756111 209.264683 
 127.198111 35.756111 213.924930 
 127.198222 35.756111 218.232618 
 127.198333 35.756111 223.891044 
 127.198444 35.756111 235.126105 
 127.198556 35.756111 237.743880 
 127.198667 35.756111 239.698150 
 127.198778 35.756111 245.466137 
 127.197444 35.756222 185.386524 
 127.197556 35.756222 187.834863 
 127.197667 35.756222 190.773086 
 127.197778 35.756222 194.049519 
 127.197889 35.756222 203.512672 
 127.198000 35.756222 207.638290 
 127.198111 35.756222 212.606784 
 127.198222 35.756222 217.695182 
 127.198333 35.756222 223.941528 
 127.198444 35.756222 234.946555 
 127.198556 35.756222 237.711423 
 127.198667 35.756222 240.299857 
 127.198778 35.756222 248.775240 
 127.197444 35.756333 186.107373 
 127.197556 35.756333 188.480393 
 127.197667 35.756333 190.778984 
 127.197778 35.756333 194.037680 
 127.197889 35.756333 202.662337 
 127.198000 35.756333 208.299829 
 127.198111 35.756333 213.358868 
 127.198222 35.756333 217.681440 
 127.198333 35.756333 224.241361 
 127.198444 35.756333 233.423678 
 127.198556 35.756333 236.516088 
 127.198667 35.756333 241.162918 
 127.198778 35.756333 249.431033 
 127.197556 35.756333 188.480393 
 127.197667 35.756333 190.778984 
 127.197778 35.756333 194.037680 
 127.197889 35.756333 202.662337 
 127.198000 35.756333 208.299829 
 127.198111 35.756333 213.358868 
 127.198222 35.756333 217.681440 
 127.198333 35.756333 224.241361 
 127.198444 35.756333 233.423678 
 127.198556 35.756333 236.516088 
 127.198667 35.756333 241.162918 
 127.198778 35.756333 249.431033 
 127.198889 35.756333 252.292915 
 127.197556 35.756444 188.732163 
 127.197667 35.756444 190.750393 
 127.197778 35.756444 194.030798 
 127.197889 35.756444 201.691509 
 127.198000 35.756444 207.373390 
 127.198111 35.756444 214.388273 
 127.198222 35.756444 217.681151 
 127.198333 35.756444 222.222857 
 127.198444 35.756444 232.973681 
 127.198556 35.756444 236.552965 
 127.198667 35.756444 241.162822 
 127.198778 35.756444 250.209060 
 127.198889 35.756444 252.349345 
 127.197556 35.756555 190.733046 
 127.197667 35.756555 190.535797 
 127.197778 35.756555 193.600730 
 127.197889 35.756555 200.516655 
 127.198000 35.756555 205.597767 
 127.198111 35.756555 214.525189 
 127.198222 35.756555 217.681466 
 127.198333 35.756555 222.051774 
 127.198444 35.756555 231.116983 
 127.198556 35.756555 236.533578 
 127.198667 35.756555 240.645948 
 127.198778 35.756555 250.160076 
 127.198889 35.756555 252.435024 
 127.197667 35.756555 190.535797 
 127.197778 35.756555 193.600730 
 127.197889 35.756555 200.516655 
 127.198000 35.756555 205.597767 
 127.198111 35.756555 214.525189 
 127.198222 35.756555 217.681466 
 127.198333 35.756555 222.051774 
 127.198444 35.756555 231.116983 
 127.198556 35.756555 236.533578 
 127.198667 35.756555 240.645948 
 127.198778 35.756555 250.160076 
 127.198889 35.756555 252.435024 
 127.199000 35.756555 256.111460 
 127.197667 35.756667 192.571459 
 127.197778 35.756667 192.842245 
 127.197889 35.756667 197.942350 
 127.198000 35.756667 205.209451 
 127.198111 35.756667 214.523472 
 127.198222 35.756667 217.692059 
 127.198333 35.756667 222.061112 
 127.198444 35.756667 230.785744 
 127.198556 35.756667 234.948800 
 127.198667 35.756667 241.162392 
 127.198778 35.756667 250.480848 
 127.198889 35.756667 253.706261 
 127.199000 35.756667 260.504309 
 127.197667 35.756778 191.867632 
 127.197778 35.756778 192.869086 
 127.197889 35.756778 196.815877 
 127.198000 35.756778 204.666042 
 127.198111 35.756778 212.562901 
 127.198222 35.756778 218.240345 
 127.198333 35.756778 223.262318 
 127.198444 35.756778 230.785743 
 127.198556 35.756778 235.227082 
 127.198667 35.756778 241.536560 
 127.198778 35.756778 252.350204 
 127.198889 35.756778 254.928310 
 127.199000 35.756778 266.392064 
 127.197778 35.756778 192.869086 
 127.197889 35.756778 196.815877 
 127.198000 35.756778 204.666042 
 127.198111 35.756778 212.562901 
 127.198222 35.756778 218.240345 
 127.198333 35.756778 223.262318 
 127.198444 35.756778 230.785743 
 127.198556 35.756778 235.227082 
 127.198667 35.756778 241.536560 
 127.198778 35.756778 252.350204 
 127.198889 35.756778 254.928310 
 127.199000 35.756778 266.392064 
 127.199111 35.756778 273.089172 
 127.197778 35.756889 194.025270 
 127.197889 35.756889 197.948981 
 127.198000 35.756889 205.741391 
 127.198111 35.756889 210.334296 
 127.198222 35.756889 220.642192 
 127.198333 35.756889 224.540296 
 127.198444 35.756889 230.857579 
 127.198556 35.756889 234.931191 
 127.198667 35.756889 245.998565 
 127.198778 35.756889 253.704207 
 127.198889 35.756889 257.635658 
 127.199000 35.756889 269.812091 
 127.199111 35.756889 272.844749 
 127.197778 35.757000 194.864160 
 127.197889 35.757000 200.516983 
 127.198000 35.757000 203.548285 
 127.198111 35.757000 209.142196 
 127.198222 35.757000 221.256446 
 127.198333 35.757000 228.775201 
 127.198444 35.757000 231.156920 
 127.198556 35.757000 236.717339 
 127.198667 35.757000 247.619082 
 127.198778 35.757000 253.691522 
 127.198889 35.757000 258.686907 
 127.199000 35.757000 270.787990 
 127.199111 35.757000 272.888841 
 127.197889 35.757000 200.516983 
 127.198000 35.757000 203.548285 
 127.198111 35.757000 209.142196 
 127.198222 35.757000 221.256446 
 127.198333 35.757000 228.775201 
 127.198444 35.757000 231.156920 
 127.198556 35.757000 236.717339 
 127.198667 35.757000 247.619082 
 127.198778 35.757000 253.691522 
 127.198889 35.757000 258.686907 
 127.199000 35.757000 270.787990 
 127.199111 35.757000 272.888841 
 127.199222 35.757000 273.086603 
 127.197889 35.757111 201.703011 
 127.198000 35.757111 203.495512 
 127.198111 35.757111 207.614469 
 127.198222 35.757111 222.430472 
 127.198333 35.757111 230.568158 
 127.198444 35.757111 232.946149 
 127.198556 35.757111 238.026238 
 127.198667 35.757111 248.738820 
 127.198778 35.757111 253.913210 
 127.198889 35.757111 258.687887 
 127.199000 35.757111 270.308237 
 127.199111 35.757111 273.031365 
 127.199222 35.757111 270.537957 
 127.197889 35.757222 202.214447 
 127.198000 35.757222 203.296311 
 127.198111 35.757222 208.109549 
 127.198222 35.757222 222.103921 
 127.198333 35.757222 230.426304 
 127.198444 35.757222 232.382146 
 127.198556 35.757222 240.257222 
 127.198667 35.757222 245.929362 
 127.198778 35.757222 252.336193 
 127.198889 35.757222 256.249802 
 127.199000 35.757222 267.398041 
 127.199111 35.757222 269.717003 
 127.199222 35.757222 265.183299 
 127.198000 35.757333 202.662771 
 127.198111 35.757333 204.667712 
 127.198222 35.757333 216.945501 
 127.198333 35.757333 227.868762 
 127.198444 35.757333 232.973638 
 127.198556 35.757333 241.159866 
 127.198667 35.757333 245.888395 
 127.198778 35.757333 248.999581 
 127.198889 35.757333 250.477421 
 127.199000 35.757333 256.250805 
 127.199111 35.757333 259.398483 
 127.199222 35.757333 258.687457 
 127.199333 35.757333 253.835145 
 127.198000 35.757444 201.691188 
 127.198111 35.757444 202.210921 
 127.198222 35.757444 211.927217 
 127.198333 35.757444 223.890767 
 127.198444 35.757444 230.565102 
 127.198556 35.757444 240.254481 
 127.198667 35.757444 244.273936 
 127.198778 35.757444 245.929604 
 127.198889 35.757444 246.793244 
 127.199000 35.757444 245.463645 
 127.199111 35.757444 248.750321 
 127.199222 35.757444 253.644442 
 127.199333 35.757444 253.619586 
 127.198000 35.757556 201.961825 
 127.198111 35.757556 202.014182 
 127.198222 35.757556 208.337265 
 127.198333 35.757556 218.240356 
 127.198444 35.757556 224.219322 
 127.198556 35.757556 236.717537 
 127.198667 35.757556 241.740056 
 127.198778 35.757556 245.986200 
 127.198889 35.757556 246.004462 
 127.199000 35.757556 241.647606 
 127.199111 35.757556 242.681739 
 127.199222 35.757556 250.855203 
 127.199333 35.757556 252.431089 
 127.198111 35.757556 202.014182 
 127.198222 35.757556 208.337265 
 127.198333 35.757556 218.240356 
 127.198444 35.757556 224.219322 
 127.198556 35.757556 236.717537 
 127.198667 35.757556 241.740056 
 127.198778 35.757556 245.986200 
 127.198889 35.757556 246.004462 
 127.199000 35.757556 241.647606 
 127.199111 35.757556 242.681739 
 127.199222 35.757556 250.855203 
 127.199333 35.757556 252.431089 
 127.199444 35.757556 250.159644 
 127.198111 35.757667 200.516674 
 127.198222 35.757667 203.497579 
 127.198333 35.757667 214.138428 
 127.198444 35.757667 217.362403 
 127.198556 35.757667 228.217343 
 127.198667 35.757667 233.409804 
 127.198778 35.757667 241.160066 
 127.198889 35.757667 241.658471 
 127.199000 35.757667 237.746780 
 127.199111 35.757667 240.673177 
 127.199222 35.757667 248.410799 
 127.199333 35.757667 249.500795 
 127.199444 35.757667 245.599392 
 127.198111 35.757778 200.511127 
 127.198222 35.757778 202.210286 
 127.198333 35.757778 210.335565 
 127.198444 35.757778 211.933114 
 127.198556 35.757778 216.044359 
 127.198667 35.757778 216.946487 
 127.198778 35.757778 228.275379 
 127.198889 35.757778 231.136645 
 127.199000 35.757778 230.799992 
 127.199111 35.757778 236.856360 
 127.199222 35.757778 238.238078 
 127.199333 35.757778 240.253771 
 127.199444 35.757778 236.560053 
 127.198222 35.757778 202.210286 
 127.198333 35.757778 210.335565 
 127.198444 35.757778 211.933114 
 127.198556 35.757778 216.044359 
 127.198667 35.757778 216.946487 
 127.198778 35.757778 228.275379 
 127.198889 35.757778 231.136645 
 127.199000 35.757778 230.799992 
 127.199111 35.757778 236.856360 
 127.199222 35.757778 238.238078 
 127.199333 35.757778 240.253771 
 127.199444 35.757778 236.560053 
 127.199556 35.757778 218.287076 
 127.198222 35.757889 201.746687 
 127.198333 35.757889 207.450293 
 127.198444 35.757889 205.751997 
 127.198556 35.757889 202.680322 
 127.198667 35.757889 204.667434 
 127.198778 35.757889 213.558203 
 127.198889 35.757889 212.575698 
 127.199000 35.757889 214.388406 
 127.199111 35.757889 224.543419 
 127.199222 35.757889 221.904037 
 127.199333 35.757889 223.301399 
 127.199444 35.757889 223.932604 
 127.199556 35.757889 215.971152 
 127.198222 35.758000 201.707099 
 127.198333 35.758000 202.014583 
 127.198444 35.758000 194.866311 
 127.198556 35.758000 191.889851 
 127.198667 35.758000 200.516571 
 127.198778 35.758000 202.534004 
 127.198889 35.758000 202.013081 
 127.199000 35.758000 200.518367 
 127.199111 35.758000 203.495817 
 127.199222 35.758000 208.298950 
 127.199333 35.758000 209.302020 
 127.199444 35.758000 217.025644 
 127.199556 35.758000 215.222366 
 127.198333 35.758000 202.014583 
 127.198444 35.758000 194.866311 
 127.198556 35.758000 191.889851 
 127.198667 35.758000 200.516571 
 127.198778 35.758000 202.534004 
 127.198889 35.758000 202.013081 
 127.199000 35.758000 200.518367 
 127.199111 35.758000 203.495817 
 127.199222 35.758000 208.298950 
 127.199333 35.758000 209.302020 
 127.199444 35.758000 217.025644 
 127.199556 35.758000 215.222366 
 127.199667 35.758000 214.244646 
 127.198333 35.758111 191.950250 
 127.198444 35.758111 185.424078 
 127.198556 35.758111 183.564980 
 127.198667 35.758111 196.046778 
 127.198778 35.758111 196.047356 
 127.198889 35.758111 194.865623 
 127.199000 35.758111 194.039695 
 127.199111 35.758111 192.573559 
 127.199222 35.758111 197.946251 
 127.199333 35.758111 202.165002 
 127.199444 35.758111 212.785283 
 127.199556 35.758111 214.390476 
 127.199667 35.758111 210.668396 
 127.198333 35.758222 183.544237 
 127.198444 35.758222 180.560581 
 127.198556 35.758222 177.636049 
 127.198667 35.758222 186.099267 
 127.198778 35.758222 185.467636 
 127.198889 35.758222 187.167730 
 127.199000 35.758222 190.348305 
 127.199111 35.758222 187.867951 
 127.199222 35.758222 192.561274 
 127.199333 35.758222 195.956595 
 127.199444 35.758222 205.221810 
 127.199556 35.758222 210.656604 
 127.199667 35.758222 207.634123 
 127.198444 35.758222 180.560581 
 127.198556 35.758222 177.636049 
 127.198667 35.758222 186.099267 
 127.198778 35.758222 185.467636 
 127.198889 35.758222 187.167730 
 127.199000 35.758222 190.348305 
 127.199111 35.758222 187.867951 
 127.199222 35.758222 192.561274 
 127.199333 35.758222 195.956595 
 127.199444 35.758222 205.221810 
 127.199556 35.758222 210.656604 
 127.199667 35.758222 207.634123 
 127.199778 35.758222 200.697081 
 127.198444 35.758333 175.846747 
 127.198556 35.758333 171.616369 
 127.198667 35.758333 172.760797 
 127.198778 35.758333 177.083626 
 127.198889 35.758333 180.542958 
 127.199000 35.758333 186.111140 
 127.199111 35.758333 186.106416 
 127.199222 35.758333 188.732035 
 127.199333 35.758333 186.834051 
 127.199444 35.758333 193.544395 
 127.199556 35.758333 204.820941 
 127.199667 35.758333 202.228306 
 127.199778 35.758333 199.486438 
 127.198444 35.758444 173.739182 
 127.198556 35.758444 168.408603 
 127.198667 35.758444 167.414438 
 127.198778 35.758444 171.919641 
 127.198889 35.758444 174.638218 
 127.199000 35.758444 182.295198 
 127.199111 35.758444 182.877727 
 127.199222 35.758444 183.543904 
 127.199333 35.758444 180.556296 
 127.199444 35.758444 182.823766 
 127.199556 35.758444 191.852265 
 127.199667 35.758444 197.976757 
 127.199778 35.758444 197.960967 
 127.198556 35.758444 168.408603 
 127.198667 35.758444 167.414438 
 127.198778 35.758444 171.919641 
 127.198889 35.758444 174.638218 
 127.199000 35.758444 182.295198 
 127.199111 35.758444 182.877727 
 127.199222 35.758444 183.543904 
 127.199333 35.758444 180.556296 
 127.199444 35.758444 182.823766 
 127.199556 35.758444 191.852265 
 127.199667 35.758444 197.976757 
 127.199778 35.758444 197.960967 
 127.199889 35.758444 196.967128 
 127.198556 35.758556 166.107352 
 127.198667 35.758556 163.401813 
 127.198778 35.758556 168.055669 
 127.198889 35.758556 171.920711 
 127.199000 35.758556 175.774308 
 127.199111 35.758556 172.765083 
 127.199222 35.758556 175.642759 
 127.199333 35.758556 175.411095 
 127.199444 35.758556 177.841911 
 127.199556 35.758556 182.377911 
 127.199667 35.758556 194.865996 
 127.199778 35.758556 197.084656 
 127.199889 35.758556 196.067146 
 127.198556 35.758667 164.872307 
 127.198667 35.758667 159.132598 
 127.198778 35.758667 162.287552 
 127.198889 35.758667 164.230301 
 127.199000 35.758667 166.070603 
 127.199111 35.758667 166.684423 
 127.199222 35.758667 169.220341 
 127.199333 35.758667 175.631492 
 127.199444 35.758667 175.407193 
 127.199556 35.758667 178.878382 
 127.199667 35.758667 190.553307 
 127.199778 35.758667 195.356437 
 127.199889 35.758667 194.710865 
 127.198667 35.758667 159.132598 
 127.198778 35.758667 162.287552 
 127.198889 35.758667 164.230301 
 127.199000 35.758667 166.070603 
 127.199111 35.758667 166.684423 
 127.199222 35.758667 169.220341 
 127.199333 35.758667 175.631492 
 127.199444 35.758667 175.407193 
 127.199556 35.758667 178.878382 
 127.199667 35.758667 190.553307 
 127.199778 35.758667 195.356437 
 127.199889 35.758667 194.710865 
 127.200000 35.758667 192.799332 
 127.198667 35.758778 156.719521 
 127.198778 35.758778 155.642926 
 127.198889 35.758778 155.536029 
 127.199000 35.758778 159.419318 
 127.199111 35.758778 163.956471 
 127.199222 35.758778 166.675150 
 127.199333 35.758778 171.919755 
 127.199444 35.758778 173.843487 
 127.199556 35.758778 175.786819 
 127.199667 35.758778 183.543993 
 127.199778 35.758778 188.734406 
 127.199889 35.758778 191.866717 
 127.200000 35.758778 191.973180 
 127.198667 35.758889 154.687111 
 127.198778 35.758889 151.794122 
 127.198889 35.758889 151.115119 
 127.199000 35.758889 156.729995 
 127.199111 35.758889 161.277519 
 127.199222 35.758889 164.730068 
 127.199333 35.758889 168.350872 
 127.199444 35.758889 169.888636 
 127.199556 35.758889 172.184879 
 127.199667 35.758889 175.417702 
 127.199778 35.758889 181.702696 
 127.199889 35.758889 190.549352 
 127.200000 35.758889 192.559845 
 127.198778 35.758889 151.794122 
 127.198889 35.758889 151.115119 
 127.199000 35.758889 156.729995 
 127.199111 35.758889 161.277519 
 127.199222 35.758889 164.730068 
 127.199333 35.758889 168.350872 
 127.199444 35.758889 169.888636 
 127.199556 35.758889 172.184879 
 127.199667 35.758889 175.417702 
 127.199778 35.758889 181.702696 
 127.199889 35.758889 190.549352 
 127.200000 35.758889 192.559845 
 127.200111 35.758889 186.193205 
 127.198778 35.759000 149.937120 
 127.198889 35.759000 150.407440 
 127.199000 35.759000 155.529624 
 127.199111 35.759000 158.873134 
 127.199222 35.759000 159.383897 
 127.199333 35.759000 160.058950 
 127.199444 35.759000 162.185685 
 127.199556 35.759000 167.559344 
 127.199667 35.759000 169.725185 
 127.199778 35.759000 173.727816 
 127.199889 35.759000 187.187212 
 127.200000 35.759000 188.754677 
 127.200111 35.759000 183.604735 
 127.198778 35.759111 148.865568 
 127.198889 35.759111 150.395743 
 127.199000 35.759111 153.467940 
 127.199111 35.759111 152.854694 
 127.199222 35.759111 151.930408 
 127.199333 35.759111 154.872131 
 127.199444 35.759111 156.707511 
 127.199556 35.759111 162.294813 
 127.199667 35.759111 168.104416 
 127.199778 35.759111 170.825752 
 127.199889 35.759111 181.159532 
 127.200000 35.759111 182.571899 
 127.200111 35.759111 182.707981 
 127.198889 35.759111 150.395743 
 127.199000 35.759111 153.467940 
 127.199111 35.759111 152.854694 
 127.199222 35.759111 151.930408 
 127.199333 35.759111 154.872131 
 127.199444 35.759111 156.707511 
 127.199556 35.759111 162.294813 
 127.199667 35.759111 168.104416 
 127.199778 35.759111 170.825752 
 127.199889 35.759111 181.159532 
 127.200000 35.759111 182.571899 
 127.200111 35.759111 182.707981 
 127.200222 35.759111 179.165741 
 127.198889 35.759222 149.311889 
 127.199000 35.759222 150.405170 
 127.199111 35.759222 145.629780 
 127.199222 35.759222 144.959307 
 127.199333 35.759222 151.808991 
 127.199444 35.759222 152.902897 
 127.199556 35.759222 156.665578 
 127.199667 35.759222 164.279287 
 127.199778 35.759222 168.078997 
 127.199889 35.759222 170.832380 
 127.200000 35.759222 172.702061 
 127.200111 35.759222 178.919757 
 127.200222 35.759222 175.020011 
 127.198889 35.759333 148.018897 
 127.199000 35.759333 143.689959 
 127.199111 35.759333 141.134326 
 127.199222 35.759333 139.696428 
 127.199333 35.759333 148.603814 
 127.199444 35.759333 148.872468 
 127.199556 35.759333 151.085321 
 127.199667 35.759333 158.469005 
 127.199778 35.759333 159.616623 
 127.199889 35.759333 163.876131 
 127.200000 35.759333 164.329444 
 127.200111 35.759333 172.071710 
 127.200222 35.759333 168.119962 
 127.199000 35.759333 143.689959 
 127.199111 35.759333 141.134326 
 127.199222 35.759333 139.696428 
 127.199333 35.759333 148.603814 
 127.199444 35.759333 148.872468 
 127.199556 35.759333 151.085321 
 127.199667 35.759333 158.469005 
 127.199778 35.759333 159.616623 
 127.199889 35.759333 163.876131 
 127.200000 35.759333 164.329444 
 127.200111 35.759333 172.071710 
 127.200222 35.759333 168.119962 
 127.200333 35.759333 159.771515 
 127.199000 35.759444 140.128515 
 127.199111 35.759444 138.538367 
 127.199222 35.759444 138.559036 
 127.199333 35.759444 141.951744 
 127.199444 35.759444 142.600210 
 127.199556 35.759444 143.673727 
 127.199667 35.759444 147.476561 
 127.199778 35.759444 150.406542 
 127.199889 35.759444 159.104059 
 127.200000 35.759444 162.201265 
 127.200111 35.759444 164.232154 
 127.200222 35.759444 162.568798 
 127.200333 35.759444 158.396844 
 127.199000 35.759556 138.558593 
 127.199111 35.759556 137.008627 
 127.199222 35.759556 135.477244 
 127.199333 35.759556 137.010033 
 127.199444 35.759556 138.757628 
 127.199556 35.759556 138.964179 
 127.199667 35.759556 141.087895 
 127.199778 35.759556 142.699295 
 127.199889 35.759556 151.931843 
 127.200000 35.759556 155.535418 
 127.200111 35.759556 161.279272 
 127.200222 35.759556 160.345368 
 127.200333 35.759556 156.666541 
 127.199111 35.759556 137.008627 
 127.199222 35.759556 135.477244 
 127.199333 35.759556 137.010033 
 127.199444 35.759556 138.757628 
 127.199556 35.759556 138.964179 
 127.199667 35.759556 141.087895 
 127.199778 35.759556 142.699295 
 127.199889 35.759556 151.931843 
 127.200000 35.759556 155.535418 
 127.200111 35.759556 161.279272 
 127.200222 35.759556 160.345368 
 127.200333 35.759556 156.666541 
 127.200444 35.759556 151.113116 
 127.199111 35.759667 136.170386 
 127.199222 35.759667 131.807948 
 127.199333 35.759667 132.389070 
 127.199444 35.759667 135.563964 
 127.199556 35.759667 133.988978 
 127.199667 35.759667 138.539354 
 127.199778 35.759667 138.963683 
 127.199889 35.759667 141.743066 
 127.200000 35.759667 145.582459 
 127.200111 35.759667 158.872820 
 127.200222 35.759667 158.393315 
 127.200333 35.759667 153.452411 
 127.200444 35.759667 150.275962 
 127.199111 35.759778 133.544302 
 127.199222 35.759778 129.007257 
 127.199333 35.759778 129.489236 
 127.199444 35.759778 131.809044 
 127.199556 35.759778 130.646725 
 127.199667 35.759778 133.639307 
 127.199778 35.759778 135.563571 
 127.199889 35.759778 137.006616 
 127.200000 35.759778 138.561871 
 127.200111 35.759778 151.258005 
 127.200222 35.759778 155.438224 
 127.200333 35.759778 150.411968 
 127.200444 35.759778 147.919893 
 127.199222 35.759778 129.007257 
 127.199333 35.759778 129.489236 
 127.199444 35.759778 131.809044 
 127.199556 35.759778 130.646725 
 127.199667 35.759778 133.639307 
 127.199778 35.759778 135.563571 
 127.199889 35.759778 137.006616 
 127.200000 35.759778 138.561871 
 127.200111 35.759778 151.258005 
 127.200222 35.759778 155.438224 
 127.200333 35.759778 150.411968 
 127.200444 35.759778 147.919893 
 127.200556 35.759778 138.538618 
 127.199222 35.759889 127.917066 
 127.199333 35.759889 127.848406 
 127.199444 35.759889 128.182264 
 127.199556 35.759889 127.648195 
 127.199667 35.759889 128.182003 
 127.199778 35.759889 129.505072 
 127.199889 35.759889 133.659271 
 127.200000 35.759889 133.542848 
 127.200111 35.759889 141.565076 
 127.200222 35.759889 148.763485 
 127.200333 35.759889 145.570687 
 127.200444 35.759889 145.307075 
 127.200556 35.759889 135.567500 
 127.199222 35.760000 127.745733 
 127.199333 35.760000 127.312308 
 127.199444 35.760000 125.049089 
 127.199556 35.760000 125.423971 
 127.199667 35.760000 124.996418 
 127.199778 35.760000 124.996341 
 127.199889 35.760000 130.646723 
 127.200000 35.760000 131.806735 
 127.200111 35.760000 133.531024 
 127.200222 35.760000 138.558848 
 127.200333 35.760000 139.653417 
 127.200444 35.760000 141.035475 
 127.200556 35.760000 133.548541 
 127.199333 35.760000 127.312308 
 127.199444 35.760000 125.049089 
 127.199556 35.760000 125.423971 
 127.199667 35.760000 124.996418 
 127.199778 35.760000 124.996341 
 127.199889 35.760000 130.646723 
 127.200000 35.760000 131.806735 
 127.200111 35.760000 133.531024 
 127.200222 35.760000 138.558848 
 127.200333 35.760000 139.653417 
 127.200444 35.760000 141.035475 
 127.200556 35.760000 133.548541 
 127.200667 35.760000 132.395691 
 127.199333 35.760111 124.995433 
 127.199444 35.760111 122.106218 
 127.199556 35.760111 123.881717 
 127.199667 35.760111 124.163775 
 127.199778 35.760111 123.255527 
 127.199889 35.760111 124.996258 
 127.200000 35.760111 129.503771 
 127.200111 35.760111 130.602301 
 127.200222 35.760111 130.645162 
 127.200333 35.760111 133.437991 
 127.200444 35.760111 137.009487 
 127.200556 35.760111 133.439900 
 127.200667 35.760111 131.807922 
 127.199333 35.760222 122.107576 
 127.199444 35.760222 120.715320 
 127.199556 35.760222 121.429725 
 127.199667 35.760222 123.269413 
 127.199778 35.760222 121.414612 
 127.199889 35.760222 122.676948 
 127.200000 35.760222 127.772966 
 127.200111 35.760222 128.181609 
 127.200222 35.760222 127.763634 
 127.200333 35.760222 128.361114 
 127.200444 35.760222 130.643251 
 127.200556 35.760222 131.808943 
 127.200667 35.760222 131.801947 
 127.199444 35.760222 120.715320 
 127.199556 35.760222 121.429725 
 127.199667 35.760222 123.269413 
 127.199778 35.760222 121.414612 
 127.199889 35.760222 122.676948 
 127.200000 35.760222 127.772966 
 127.200111 35.760222 128.181609 
 127.200222 35.760222 127.763634 
 127.200333 35.760222 128.361114 
 127.200444 35.760222 130.643251 
 127.200556 35.760222 131.808943 
 127.200667 35.760222 131.801947 
 127.200778 35.760222 131.806723 
 127.199444 35.760333 120.102007 
 127.199556 35.760333 120.560145 
 127.199667 35.760333 122.679962 
 127.199778 35.760333 120.571896 
 127.199889 35.760333 120.559598 
 127.200000 35.760333 125.409899 
 127.200111 35.760333 125.414047 
 127.200222 35.760333 125.406427 
 127.200333 35.760333 126.346179 
 127.200444 35.760333 127.771685 
 127.200556 35.760333 130.637728 
 127.200667 35.760333 131.342039 
 127.200778 35.760333 131.819368 
 127.199444 35.760444 120.224813 
 127.199556 35.760444 120.651154 
 127.199667 35.760444 121.393468 
 127.199778 35.760444 120.726357 
 127.199889 35.760444 120.718679 
 127.200000 35.760444 121.393275 
 127.200111 35.760444 120.589567 
 127.200222 35.760444 123.254612 
 127.200333 35.760444 124.926322 
 127.200444 35.760444 124.926600 
 127.200556 35.760444 128.426626 
 127.200667 35.760444 130.638157 
 127.200778 35.760444 132.398868 
 127.199556 35.760556 121.392694 
 127.199667 35.760556 121.393308 
 127.199778 35.760556 120.717087 
 127.199889 35.760556 120.046409 
 127.200000 35.760556 116.783460 
 127.200111 35.760556 115.787673 
 127.200222 35.760556 119.470349 
 127.200333 35.760556 121.395208 
 127.200444 35.760556 120.560506 
 127.200556 35.760556 125.364764 
 127.200667 35.760556 128.359402 
 127.200778 35.760556 133.447243 
 127.200889 35.760556 135.581506 
 127.199556 35.760667 121.839366 
 127.199667 35.760667 121.393234 
 127.199778 35.760667 120.674670 
 127.199889 35.760667 119.483493 
 127.200000 35.760667 114.397965 
 127.200111 35.760667 114.423455 
 127.200222 35.760667 115.784923 
 127.200333 35.760667 117.171341 
 127.200444 35.760667 117.110014 
 127.200556 35.760667 122.678787 
 127.200667 35.760667 125.630771 
 127.200778 35.760667 133.658738 
 127.200889 35.760667 135.588994 
 127.199556 35.760778 121.910674 
 127.199667 35.760778 121.718718 
 127.199778 35.760778 120.724533 
 127.199889 35.760778 119.915008 
 127.200000 35.760778 114.399813 
 127.200111 35.760778 114.569463 
 127.200222 35.760778 114.352280 
 127.200333 35.760778 115.239396 
 127.200444 35.760778 115.825843 
 127.200556 35.760778 120.718856 
 127.200667 35.760778 124.156517 
 127.200778 35.760778 133.447065 
 127.200889 35.760778 135.562759 
 127.199667 35.760778 121.718718 
 127.199778 35.760778 120.724533 
 127.199889 35.760778 119.915008 
 127.200000 35.760778 114.399813 
 127.200111 35.760778 114.569463 
 127.200222 35.760778 114.352280 
 127.200333 35.760778 115.239396 
 127.200444 35.760778 115.825843 
 127.200556 35.760778 120.718856 
 127.200667 35.760778 124.156517 
 127.200778 35.760778 133.447065 
 127.200889 35.760778 135.562759 
 127.201000 35.760778 132.403017 
 127.199667 35.760889 120.334412 
 127.199778 35.760889 120.726358 
 127.199889 35.760889 120.127551 
 127.200000 35.760889 116.094681 
 127.200111 35.760889 114.558183 
 127.200222 35.760889 112.549328 
 127.200333 35.760889 114.343921 
 127.200444 35.760889 115.236501 
 127.200556 35.760889 119.470328 
 127.200667 35.760889 122.107133 
 127.200778 35.760889 131.808953 
 127.200889 35.760889 133.637006 
 127.201000 35.760889 128.367435 
 127.199667 35.761000 120.567644 
 127.199778 35.761000 120.726215 
 127.199889 35.761000 120.711887 
 127.200000 35.761000 118.518741 
 127.200111 35.761000 114.576658 
 127.200222 35.761000 112.084893 
 127.200333 35.761000 114.573371 
 127.200444 35.761000 114.344212 
 127.200556 35.761000 116.223698 
 127.200667 35.761000 120.061349 
 127.200778 35.761000 126.330163 
 127.200889 35.761000 128.184374 
 127.201000 35.761000 123.811265 
 127.199778 35.761000 120.726215 
 127.199889 35.761000 120.711887 
 127.200000 35.761000 118.518741 
 127.200111 35.761000 114.576658 
 127.200222 35.761000 112.084893 
 127.200333 35.761000 114.573371 
 127.200444 35.761000 114.344212 
 127.200556 35.761000 116.223698 
 127.200667 35.761000 120.061349 
 127.200778 35.761000 126.330163 
 127.200889 35.761000 128.184374 
 127.201000 35.761000 123.811265 
 127.201111 35.761000 120.726174 
 127.199778 35.761111 120.647284 
 127.199889 35.761111 120.298171 
 127.200000 35.761111 120.076347 
 127.200111 35.761111 114.343865 
 127.200222 35.761111 112.037389 
 127.200333 35.761111 112.086003 
 127.200444 35.761111 112.085015 
 127.200556 35.761111 112.118402 
 127.200667 35.761111 114.370637 
 127.200778 35.761111 116.812450 
 127.200889 35.761111 119.992959 
 127.201000 35.761111 120.560163 
 127.201111 35.761111 120.112232 
 127.199778 35.761222 120.558572 
 127.199889 35.761222 121.392716 
 127.200000 35.761222 120.560419 
 127.200111 35.761222 114.397298 
 127.200222 35.761222 112.037286 
 127.200333 35.761222 112.037199 
 127.200444 35.761222 110.510103 
 127.200556 35.761222 110.076147 
 127.200667 35.761222 110.086895 
 127.200778 35.761222 109.991454 
 127.200889 35.761222 112.085131 
 127.201000 35.761222 118.878570 
 127.201111 35.761222 120.007638 
 127.199889 35.761222 121.392716 
 127.200000 35.761222 120.560419 
 127.200111 35.761222 114.397298 
 127.200222 35.761222 112.037286 
 127.200333 35.761222 112.037199 
 127.200444 35.761222 110.510103 
 127.200556 35.761222 110.076147 
 127.200667 35.761222 110.086895 
 127.200778 35.761222 109.991454 
 127.200889 35.761222 112.085131 
 127.201000 35.761222 118.878570 
 127.201111 35.761222 120.007638 
 127.201222 35.761222 118.543399 
 127.199889 35.761333 122.623886 
 127.200000 35.761333 120.295854 
 127.200111 35.761333 115.237456 
 127.200222 35.761333 112.085346 
 127.200333 35.761333 112.050077 
 127.200444 35.761333 109.747637 
 127.200556 35.761333 109.573717 
 127.200667 35.761333 108.756011 
 127.200778 35.761333 107.533019 
 127.200889 35.761333 109.595086 
 127.201000 35.761333 117.130222 
 127.201111 35.761333 119.447935 
 127.201222 35.761333 116.783070 
 127.199889 35.761444 122.680014 
 127.200000 35.761444 120.305484 
 127.200111 35.761444 115.824633 
 127.200222 35.761444 114.504229 
 127.200333 35.761444 114.555788 
 127.200444 35.761444 109.608266 
 127.200556 35.761444 108.729581 
 127.200667 35.761444 108.699443 
 127.200778 35.761444 106.360148 
 127.200889 35.761444 108.703331 
 127.201000 35.761444 115.740536 
 127.201111 35.761444 116.781989 
 127.201222 35.761444 114.397297 
 127.200000 35.761444 120.305484 
 127.200111 35.761444 115.824633 
 127.200222 35.761444 114.504229 
 127.200333 35.761444 114.555788 
 127.200444 35.761444 109.608266 
 127.200556 35.761444 108.729581 
 127.200667 35.761444 108.699443 
 127.200778 35.761444 106.360148 
 127.200889 35.761444 108.703331 
 127.201000 35.761444 115.740536 
 127.201111 35.761444 116.781989 
 127.201222 35.761444 114.397297 
 127.201333 35.761444 112.577310 
 127.200000 35.761556 120.300569 
 127.200111 35.761556 116.786685 
 127.200222 35.761556 116.147328 
 127.200333 35.761556 115.248974 
 127.200444 35.761556 109.847706 
 127.200556 35.761556 108.710275 
 127.200667 35.761556 108.130904 
 127.200778 35.761556 106.355137 
 127.200889 35.761556 107.540315 
 127.201000 35.761556 112.037702 
 127.201111 35.761556 112.531702 
 127.201222 35.761556 112.512331 
 127.201333 35.761556 112.461201 
 127.200000 35.761667 120.560597 
 127.200111 35.761667 118.519700 
 127.200222 35.761667 118.516522 
 127.200333 35.761667 116.784994 
 127.200444 35.761667 110.081124 
 127.200556 35.761667 108.694657 
 127.200667 35.761667 107.582095 
 127.200778 35.761667 106.356136 
 127.200889 35.761667 106.354148 
 127.201000 35.761667 107.199508 
 127.201111 35.761667 108.364768 
 127.201222 35.761667 111.781333 
 127.201333 35.761667 112.084186 
 127.200111 35.761667 118.519700 
 127.200222 35.761667 118.516522 
 127.200333 35.761667 116.784994 
 127.200444 35.761667 110.081124 
 127.200556 35.761667 108.694657 
 127.200667 35.761667 107.582095 
 127.200778 35.761667 106.356136 
 127.200889 35.761667 106.354148 
 127.201000 35.761667 107.199508 
 127.201111 35.761667 108.364768 
 127.201222 35.761667 111.781333 
 127.201333 35.761667 112.084186 
 127.201444 35.761667 111.390857 
 127.200111 35.761778 119.470511 
 127.200222 35.761778 119.470162 
 127.200333 35.761778 118.509393 
 127.200444 35.761778 111.787523 
 127.200556 35.761778 108.713637 
 127.200667 35.761778 107.612112 
 127.200778 35.761778 106.361309 
 127.200889 35.761778 105.965692 
 127.201000 35.761778 104.123026 
 127.201111 35.761778 105.215811 
 127.201222 35.761778 109.601183 
 127.201333 35.761778 111.947341 
 127.201444 35.761778 109.592248 
 127.200111 35.761889 119.819423 
 127.200222 35.761889 119.770455 
 127.200333 35.761889 119.134440 
 127.200444 35.761889 114.577243 
 127.200556 35.761889 110.034576 
 127.200667 35.761889 108.703063 
 127.200778 35.761889 106.573012 
 127.200889 35.761889 105.740085 
 127.201000 35.761889 103.420102 
 127.201111 35.761889 103.496070 
 127.201222 35.761889 108.309695 
 127.201333 35.761889 110.082186 
 127.201444 35.761889 107.542233 
 127.200222 35.761889 119.770455 
 127.200333 35.761889 119.134440 
 127.200444 35.761889 114.577243 
 127.200556 35.761889 110.034576 
 127.200667 35.761889 108.703063 
 127.200778 35.761889 106.573012 
 127.200889 35.761889 105.740085 
 127.201000 35.761889 103.420102 
 127.201111 35.761889 103.496070 
 127.201222 35.761889 108.309695 
 127.201333 35.761889 110.082186 
 127.201444 35.761889 107.542233 
 127.201556 35.761889 105.520816 
 127.200222 35.762000 120.064073 
 127.200333 35.762000 120.024154 
 127.200444 35.762000 116.755734 
 127.200556 35.762000 112.102223 
 127.200667 35.762000 109.595325 
 127.200778 35.762000 107.540176 
 127.200889 35.762000 106.287316 
 127.201000 35.762000 103.053206 
 127.201111 35.762000 102.661310 
 127.201222 35.762000 106.354451 
 127.201333 35.762000 108.712075 
 127.201444 35.762000 106.353768 
 127.201556 35.762000 105.502897 
 127.200222 35.762111 120.113637 
 127.200333 35.762111 120.594566 
 127.200444 35.762111 119.562634 
 127.200556 35.762111 115.713011 
 127.200667 35.762111 111.781348 
 127.200778 35.762111 108.712727 
 127.200889 35.762111 106.356236 
 127.201000 35.762111 103.496334 
 127.201111 35.762111 102.708074 
 127.201222 35.762111 105.506078 
 127.201333 35.762111 106.370367 
 127.201444 35.762111 105.524437 
 127.201556 35.762111 105.345883 
 127.200333 35.762111 120.594566 
 127.200444 35.762111 119.562634 
 127.200556 35.762111 115.713011 
 127.200667 35.762111 111.781348 
 127.200778 35.762111 108.712727 
 127.200889 35.762111 106.356236 
 127.201000 35.762111 103.496334 
 127.201111 35.762111 102.708074 
 127.201222 35.762111 105.506078 
 127.201333 35.762111 106.370367 
 127.201444 35.762111 105.524437 
 127.201556 35.762111 105.345883 
 127.201667 35.762111 104.369664 
 127.200333 35.762222 121.715698 
 127.200444 35.762222 120.564884 
 127.200556 35.762222 117.138142 
 127.200667 35.762222 112.084990 
 127.200778 35.762222 110.078684 
 127.200889 35.762222 107.548353 
 127.201000 35.762222 104.130491 
 127.201111 35.762222 103.499771 
 127.201222 35.762222 104.138994 
 127.201333 35.762222 105.521371 
 127.201444 35.762222 105.459821 
 127.201556 35.762222 104.454939 
 127.201667 35.762222 104.132555 
 127.200333 35.762333 121.392640 
 127.200444 35.762333 120.390972 
 127.200556 35.762333 117.161342 
 127.200667 35.762333 112.489351 
 127.200778 35.762333 111.781749 
 127.200889 35.762333 109.435703 
 127.201000 35.762333 105.502794 
 127.201111 35.762333 104.133064 
 127.201222 35.762333 104.134682 
 127.201333 35.762333 104.153492 
 127.201444 35.762333 104.252938 
 127.201556 35.762333 104.132764 
 127.201667 35.762333 103.485059 
 127.200444 35.762333 120.390972 
 127.200556 35.762333 117.161342 
 127.200667 35.762333 112.489351 
 127.200778 35.762333 111.781749 
 127.200889 35.762333 109.435703 
 127.201000 35.762333 105.502794 
 127.201111 35.762333 104.133064 
 127.201222 35.762333 104.134682 
 127.201333 35.762333 104.153492 
 127.201444 35.762333 104.252938 
 127.201556 35.762333 104.132764 
 127.201667 35.762333 103.485059 
 127.201778 35.762333 101.302499 
 127.200444 35.762444 120.560469 
 127.200556 35.762444 116.578905 
 127.200667 35.762444 112.266721 
 127.200778 35.762444 112.037731 
 127.200889 35.762444 110.059512 
 127.201000 35.762444 105.767897 
 127.201111 35.762444 104.573946 
 127.201222 35.762444 104.132870 
 127.201333 35.762444 103.878014 
 127.201444 35.762444 104.130712 
 127.201556 35.762444 103.496106 
 127.201667 35.762444 102.700571 
 127.201778 35.762444 100.326681 
 127.200444 35.762556 120.432152 
 127.200556 35.762556 115.259524 
 127.200667 35.762556 112.105608 
 127.200778 35.762556 112.085175 
 127.200889 35.762556 111.728606 
 127.201000 35.762556 106.351315 
 127.201111 35.762556 105.179500 
 127.201222 35.762556 104.089740 
 127.201333 35.762556 103.483420 
 127.201444 35.762556 103.496267 
 127.201556 35.762556 102.708531 
 127.201667 35.762556 100.336394 
 127.201778 35.762556 100.155026 
 127.200556 35.762556 115.259524 
 127.200667 35.762556 112.105608 
 127.200778 35.762556 112.085175 
 127.200889 35.762556 111.728606 
 127.201000 35.762556 106.351315 
 127.201111 35.762556 105.179500 
 127.201222 35.762556 104.089740 
 127.201333 35.762556 103.483420 
 127.201444 35.762556 103.496267 
 127.201556 35.762556 102.708531 
 127.201667 35.762556 100.336394 
 127.201778 35.762556 100.155026 
 127.201889 35.762556 99.700642 
 127.200556 35.762667 114.344964 
 127.200667 35.762667 112.484270 
 127.200778 35.762667 112.542172 
 127.200889 35.762667 112.035982 
 127.201000 35.762667 106.357883 
 127.201111 35.762667 104.862720 
 127.201222 35.762667 103.502130 
 127.201333 35.762667 102.657859 
 127.201444 35.762667 102.652827 
 127.201556 35.762667 102.160584 
 127.201667 35.762667 100.029087 
 127.201778 35.762667 99.592223 
 127.201889 35.762667 99.637177 
 127.200556 35.762778 113.948815 
 127.200667 35.762778 112.712896 
 127.200778 35.762778 114.571742 
 127.200889 35.762778 112.090063 
 127.201000 35.762778 107.421824 
 127.201111 35.762778 104.242242 
 127.201222 35.762778 103.484436 
 127.201333 35.762778 102.653994 
 127.201444 35.762778 102.705898 
 127.201556 35.762778 100.324611 
 127.201667 35.762778 99.507522 
 127.201778 35.762778 99.525787 
 127.201889 35.762778 99.581255 
 127.200667 35.762778 112.712896 
 127.200778 35.762778 114.571742 
 127.200889 35.762778 112.090063 
 127.201000 35.762778 107.421824 
 127.201111 35.762778 104.242242 
 127.201222 35.762778 103.484436 
 127.201333 35.762778 102.653994 
 127.201444 35.762778 102.705898 
 127.201556 35.762778 100.324611 
 127.201667 35.762778 99.507522 
 127.201778 35.762778 99.525787 
 127.201889 35.762778 99.581255 
 127.202000 35.762778 99.508421 
 127.200667 35.762889 114.570490 
 127.200778 35.762889 114.343846 
 127.200889 35.762889 112.110579 
 127.201000 35.762889 107.506612 
 127.201111 35.762889 104.136671 
 127.201222 35.762889 102.810702 
 127.201333 35.762889 102.705874 
 127.201444 35.762889 101.450103 
 127.201556 35.762889 99.525838 
 127.201667 35.762889 99.505755 
 127.201778 35.762889 99.509997 
 127.201889 35.762889 99.516876 
 127.202000 35.762889 99.510242 
 127.200667 35.763000 114.343814 
 127.200778 35.763000 114.343842 
 127.200889 35.763000 112.036943 
 127.201000 35.763000 106.358679 
 127.201111 35.763000 104.132586 
 127.201222 35.763000 102.656932 
 127.201333 35.763000 102.706961 
 127.201444 35.763000 100.326681 
 127.201556 35.763000 99.510308 
 127.201667 35.763000 99.518480 
 127.201778 35.763000 99.506321 
 127.201889 35.763000 99.507675 
 127.202000 35.763000 100.120718 
 127.200778 35.763000 114.343842 
 127.200889 35.763000 112.036943 
 127.201000 35.763000 106.358679 
 127.201111 35.763000 104.132586 
 127.201222 35.763000 102.656932 
 127.201333 35.763000 102.706961 
 127.201444 35.763000 100.326681 
 127.201556 35.763000 99.510308 
 127.201667 35.763000 99.518480 
 127.201778 35.763000 99.506321 
 127.201889 35.763000 99.507675 
 127.202000 35.763000 100.120718 
 127.202111 35.763000 100.184629 
 127.200778 35.763111 114.456684 
 127.200889 35.763111 110.082773 
 127.201000 35.763111 105.842085 
 127.201111 35.763111 104.118071 
 127.201222 35.763111 102.653836 
 127.201333 35.763111 101.280006 
 127.201444 35.763111 99.531660 
 127.201556 35.763111 99.993017 
 127.201667 35.763111 100.173633 
 127.201778 35.763111 100.178750 
 127.201889 35.763111 100.181751 
 127.202000 35.763111 100.184558 
 127.202111 35.763111 100.184637 
 127.200778 35.763222 112.534105 
 127.200889 35.763222 108.712120 
 127.201000 35.763222 105.459325 
 127.201111 35.763222 103.606504 
 127.201222 35.763222 102.708516 
 127.201333 35.763222 101.738276 
 127.201444 35.763222 99.506377 
 127.201556 35.763222 100.184203 
 127.201667 35.763222 100.180705 
 127.201778 35.763222 100.182270 
 127.201889 35.763222 100.184130 
 127.202000 35.763222 100.184591 
 127.202111 35.763222 100.184572 
 127.200778 35.763333 111.791086 
 127.200889 35.763333 106.536481 
 127.201000 35.763333 104.134575 
 127.201111 35.763333 103.488489 
 127.201222 35.763333 102.567395 
 127.201333 35.763333 102.076486 
 127.201444 35.763333 99.533181 
 127.201556 35.763333 100.183543 
 127.201667 35.763333 98.489483 
 127.201778 35.763333 99.498171 
 127.201889 35.763333 100.096036 
 127.202000 35.763333 100.171486 
 127.202111 35.763333 100.168015 
 127.200889 35.763333 106.536481 
 127.201000 35.763333 104.134575 
 127.201111 35.763333 103.488489 
 127.201222 35.763333 102.567395 
 127.201333 35.763333 102.076486 
 127.201444 35.763333 99.533181 
 127.201556 35.763333 100.183543 
 127.201667 35.763333 98.489483 
 127.201778 35.763333 99.498171 
 127.201889 35.763333 100.096036 
 127.202000 35.763333 100.171486 
 127.202111 35.763333 100.168015 
 127.202222 35.763333 98.255278 
 127.200889 35.763444 105.548463 
 127.201000 35.763444 103.580354 
 127.201111 35.763444 102.707563 
 127.201222 35.763444 101.278323 
 127.201333 35.763444 102.159583 
 127.201444 35.763444 100.184588 
 127.201556 35.763444 98.303137 
 127.201667 35.763444 98.256776 
 127.201778 35.763444 98.257535 
 127.201889 35.763444 98.269430 
 127.202000 35.763444 98.255730 
 127.202111 35.763444 98.255521 
 127.202222 35.763444 96.879918 
 127.200889 35.763556 104.163427 
 127.201000 35.763556 102.653281 
 127.201111 35.763556 100.326703 
 127.201222 35.763556 100.326705 
 127.201333 35.763556 100.326620 
 127.201444 35.763556 98.255236 
 127.201556 35.763556 98.240017 
 127.201667 35.763556 98.253900 
 127.201778 35.763556 97.907168 
 127.201889 35.763556 97.903714 
 127.202000 35.763556 96.871846 
 127.202111 35.763556 96.865438 
 127.202222 35.763556 96.482301 
 127.201000 35.763556 102.653281 
 127.201111 35.763556 100.326703 
 127.201222 35.763556 100.326705 
 127.201333 35.763556 100.326620 
 127.201444 35.763556 98.255236 
 127.201556 35.763556 98.240017 
 127.201667 35.763556 98.253900 
 127.201778 35.763556 97.907168 
 127.201889 35.763556 97.903714 
 127.202000 35.763556 96.871846 
 127.202111 35.763556 96.865438 
 127.202222 35.763556 96.482301 
 127.202333 35.763556 95.468747 
 127.201000 35.763667 102.149700 
 127.201111 35.763667 100.183853 
 127.201222 35.763667 100.182124 
 127.201333 35.763667 100.183674 
 127.201444 35.763667 97.798712 
 127.201556 35.763667 97.901241 
 127.201667 35.763667 97.901561 
 127.201778 35.763667 96.605501 
 127.201889 35.763667 96.506831 
 127.202000 35.763667 95.857969 
 127.202111 35.763667 95.857863 
 127.202222 35.763667 95.850879 
 127.202333 35.763667 95.433339 
 127.201000 35.763778 99.505719 
 127.201111 35.763778 98.954828 
 127.201222 35.763778 98.254655 
 127.201333 35.763778 97.889419 
 127.201444 35.763778 96.865574 
 127.201556 35.763778 96.909068 
 127.201667 35.763778 96.851230 
 127.201778 35.763778 95.855991 
 127.201889 35.763778 95.446374 
 127.202000 35.763778 94.709519 
 127.202111 35.763778 94.863924 
 127.202222 35.763778 95.430952 
 127.202333 35.763778 95.426626 
 127.201111 35.763778 98.954828 
 127.201222 35.763778 98.254655 
 127.201333 35.763778 97.889419 
 127.201444 35.763778 96.865574 
 127.201556 35.763778 96.909068 
 127.201667 35.763778 96.851230 
 127.201778 35.763778 95.855991 
 127.201889 35.763778 95.446374 
 127.202000 35.763778 94.709519 
 127.202111 35.763778 94.863924 
 127.202222 35.763778 95.430952 
 127.202333 35.763778 95.426626 
 127.202444 35.763778 95.411531 
 127.201111 35.763889 98.255734 
 127.201222 35.763889 97.829684 
 127.201333 35.763889 96.863213 
 127.201444 35.763889 96.861951 
 127.201556 35.763889 96.864530 
 127.201667 35.763889 95.863284 
 127.201778 35.763889 94.751097 
 127.201889 35.763889 94.686216 
 127.202000 35.763889 94.415645 
 127.202111 35.763889 94.592308 
 127.202222 35.763889 95.303003 
 127.202333 35.763889 95.405427 
 127.202444 35.763889 95.342817 
 127.201111 35.764000 98.143761 
 127.201222 35.764000 96.865187 
 127.201333 35.764000 96.543662 
 127.201444 35.764000 96.506769 
 127.201556 35.764000 96.506482 
 127.201667 35.764000 95.475729 
 127.201778 35.764000 94.697845 
 127.201889 35.764000 94.674845 
 127.202000 35.764000 94.400460 
 127.202111 35.764000 94.538846 
 127.202222 35.764000 95.074298 
 127.202333 35.764000 95.313569 
 127.202444 35.764000 95.146160 
 127.201222 35.764000 96.865187 
 127.201333 35.764000 96.543662 
 127.201444 35.764000 96.506769 
 127.201556 35.764000 96.506482 
 127.201667 35.764000 95.475729 
 127.201778 35.764000 94.697845 
 127.201889 35.764000 94.674845 
 127.202000 35.764000 94.400460 
 127.202111 35.764000 94.538846 
 127.202222 35.764000 95.074298 
 127.202333 35.764000 95.313569 
 127.202444 35.764000 95.146160 
 127.202556 35.764000 94.992291 
 127.201222 35.764111 96.823787 
 127.201333 35.764111 96.506614 
 127.201444 35.764111 95.858656 
 127.201556 35.764111 95.857668 
 127.201667 35.764111 95.431474 
 127.201778 35.764111 95.146745 
 127.201889 35.764111 94.756491 
 127.202000 35.764111 94.675542 
 127.202111 35.764111 94.691236 
 127.202222 35.764111 95.084908 
 127.202333 35.764111 95.106490 
 127.202444 35.764111 94.981313 
 127.202556 35.764111 94.976453 
 127.201222 35.764222 96.555270 
 127.201333 35.764222 96.499016 
 127.201444 35.764222 95.431466 
 127.201556 35.764222 94.806718 
 127.201667 35.764222 95.431879 
 127.201778 35.764222 95.434021 
 127.201889 35.764222 95.428084 
 127.202000 35.764222 95.316784 
 127.202111 35.764222 95.367886 
 127.202222 35.764222 95.241151 
 127.202333 35.764222 94.941698 
 127.202444 35.764222 94.913632 
 127.202556 35.764222 94.970047 
 127.201333 35.764222 96.499016 
 127.201444 35.764222 95.431466 
 127.201556 35.764222 94.806718 
 127.201667 35.764222 95.431879 
 127.201778 35.764222 95.434021 
 127.201889 35.764222 95.428084 
 127.202000 35.764222 95.316784 
 127.202111 35.764222 95.367886 
 127.202222 35.764222 95.241151 
 127.202333 35.764222 94.941698 
 127.202444 35.764222 94.913632 
 127.202556 35.764222 94.970047 
 127.202667 35.764222 94.918824 
 127.201333 35.764333 95.857830 
 127.201444 35.764333 94.691955 
 127.201556 35.764333 94.640003 
 127.201667 35.764333 95.412061 
 127.201778 35.764333 95.443479 
 127.201889 35.764333 95.436451 
 127.202000 35.764333 95.433769 
 127.202111 35.764333 95.433337 
 127.202222 35.764333 95.286761 
 127.202333 35.764333 94.797092 
 127.202444 35.764333 94.858025 
 127.202556 35.764333 94.948640 
 127.202667 35.764333 94.809875 
 127.201333 35.764445 95.437974 
 127.201444 35.764445 94.591018 
 127.201556 35.764445 94.375677 
 127.201667 35.764445 94.677856 
 127.201778 35.764445 95.413754 
 127.201889 35.764445 95.395760 
 127.202000 35.764445 95.433709 
 127.202111 35.764445 95.434412 
 127.202222 35.764445 94.923640 
 127.202333 35.764445 94.695967 
 127.202444 35.764445 94.761477 
 127.202556 35.764445 94.884100 
 127.202667 35.764445 94.720930 
 127.201444 35.764445 94.591018 
 127.201556 35.764445 94.375677 
 127.201667 35.764445 94.677856 
 127.201778 35.764445 95.413754 
 127.201889 35.764445 95.395760 
 127.202000 35.764445 95.433709 
 127.202111 35.764445 95.434412 
 127.202222 35.764445 94.923640 
 127.202333 35.764445 94.695967 
 127.202444 35.764445 94.761477 
 127.202556 35.764445 94.884100 
 127.202667 35.764445 94.720930 
 127.202778 35.764445 94.659698 
 127.201444 35.764556 94.392764 
 127.201556 35.764556 94.371412 
 127.201667 35.764556 94.370945 
 127.201778 35.764556 94.378581 
 127.201889 35.764556 94.384784 
 127.202000 35.764556 95.318954 
 127.202111 35.764556 95.428842 
 127.202222 35.764556 94.685249 
 127.202333 35.764556 94.560591 
 127.202444 35.764556 94.702786 
 127.202556 35.764556 94.791881 
 127.202667 35.764556 94.697646 
 127.202778 35.764556 94.383141 
 127.201444 35.764667 94.371592 
 127.201556 35.764667 94.246511 
 127.201667 35.764667 93.884989 
 127.201778 35.764667 94.257108 
 127.201889 35.764667 94.257538 
 127.202000 35.764667 94.399428 
 127.202111 35.764667 94.727462 
 127.202222 35.764667 94.380589 
 127.202333 35.764667 94.373512 
 127.202444 35.764667 94.686545 
 127.202556 35.764667 94.717125 
 127.202667 35.764667 94.682873 
 127.202778 35.764667 94.371510 
 127.201556 35.764667 94.246511 
 127.201667 35.764667 93.884989 
 127.201778 35.764667 94.257108 
 127.201889 35.764667 94.257538 
 127.202000 35.764667 94.399428 
 127.202111 35.764667 94.727462 
 127.202222 35.764667 94.380589 
 127.202333 35.764667 94.373512 
 127.202444 35.764667 94.686545 
 127.202556 35.764667 94.717125 
 127.202667 35.764667 94.682873 
 127.202778 35.764667 94.371510 
 127.202889 35.764667 92.153167 
 127.201556 35.764778 93.343572 
 127.201667 35.764778 93.341871 
 127.201778 35.764778 93.340008 
 127.201889 35.764778 93.333780 
 127.202000 35.764778 94.257136 
 127.202111 35.764778 94.371587 
 127.202222 35.764778 94.371587 
 127.202333 35.764778 94.371595 
 127.202444 35.764778 94.508758 
 127.202556 35.764778 94.670846 
 127.202667 35.764778 94.377204 
 127.202778 35.764778 93.425268 
 127.202889 35.764778 92.112297 
 127.201556 35.764889 93.341224 
 127.201667 35.764889 93.324338 
 127.201778 35.764889 92.664060 
 127.201889 35.764889 92.320554 
 127.202000 35.764889 93.298379 
 127.202111 35.764889 93.435664 
 127.202222 35.764889 94.260400 
 127.202333 35.764889 94.371509 
 127.202444 35.764889 94.371583 
 127.202556 35.764889 94.371587 
 127.202667 35.764889 94.248435 
 127.202778 35.764889 92.203098 
 127.202889 35.764889 90.903300 
 127.201667 35.764889 93.324338 
 127.201778 35.764889 92.664060 
 127.201889 35.764889 92.320554 
 127.202000 35.764889 93.298379 
 127.202111 35.764889 93.435664 
 127.202222 35.764889 94.260400 
 127.202333 35.764889 94.371509 
 127.202444 35.764889 94.371583 
 127.202556 35.764889 94.371587 
 127.202667 35.764889 94.248435 
 127.202778 35.764889 92.203098 
 127.202889 35.764889 90.903300 
 127.203000 35.764889 90.649506 
 127.201667 35.765000 93.231205 
 127.201778 35.765000 92.270420 
 127.201889 35.765000 92.221102 
 127.202000 35.765000 92.237108 
 127.202111 35.765000 93.154733 
 127.202222 35.765000 93.467668 
 127.202333 35.765000 94.255262 
 127.202444 35.765000 93.342364 
 127.202556 35.765000 93.340742 
 127.202667 35.765000 92.153166 
 127.202778 35.765000 91.959734 
 127.202889 35.765000 90.659727 
 127.203000 35.765000 90.641660 
 127.201667 35.765111 92.942593 
 127.201778 35.765111 92.229539 
 127.201889 35.765111 92.212744 
 127.202000 35.765111 92.210857 
 127.202111 35.765111 92.243830 
 127.202222 35.765111 93.320356 
 127.202333 35.765111 92.424404 
 127.202444 35.765111 92.153008 
 127.202556 35.765111 92.152563 
 127.202667 35.765111 90.655808 
 127.202778 35.765111 90.650541 
 127.202889 35.765111 90.649570 
 127.203000 35.765111 90.289491 
 127.201778 35.765111 92.229539 
 127.201889 35.765111 92.212744 
 127.202000 35.765111 92.210857 
 127.202111 35.765111 92.243830 
 127.202222 35.765111 93.320356 
 127.202333 35.765111 92.424404 
 127.202444 35.765111 92.153008 
 127.202556 35.765111 92.152563 
 127.202667 35.765111 90.655808 
 127.202778 35.765111 90.650541 
 127.202889 35.765111 90.649570 
 127.203000 35.765111 90.289491 
 127.203111 35.765111 90.084997 
 127.201778 35.765222 92.216120 
 127.201889 35.765222 92.209342 
 127.202000 35.765222 92.199912 
 127.202111 35.765222 92.209417 
 127.202222 35.765222 92.210903 
 127.202333 35.765222 92.150678 
 127.202444 35.765222 90.743017 
 127.202556 35.765222 90.668684 
 127.202667 35.765222 90.649119 
 127.202778 35.765222 90.648756 
 127.202889 35.765222 90.637009 
 127.203000 35.765222 90.091722 
 127.203111 35.765222 90.084054 
 127.201778 35.765333 92.209469 
 127.201889 35.765333 92.153368 
 127.202000 35.765333 92.150585 
 127.202111 35.765333 92.152977 
 127.202222 35.765333 92.046689 
 127.202333 35.765333 90.594530 
 127.202444 35.765333 90.649757 
 127.202556 35.765333 90.650062 
 127.202667 35.765333 90.648646 
 127.202778 35.765333 90.618435 
 127.202889 35.765333 90.085429 
 127.203000 35.765333 90.083874 
 127.203111 35.765333 90.083052 
 127.201889 35.765445 90.712705 
 127.202000 35.765445 90.649297 
 127.202111 35.765445 90.649790 
 127.202222 35.765445 90.075622 
 127.202333 35.765445 89.865998 
 127.202444 35.765445 90.647597 
 127.202556 35.765445 90.649721 
 127.202667 35.765445 90.648624 
 127.202778 35.765445 90.083691 
 127.202889 35.765445 89.432109 
 127.203000 35.765445 90.074795 
 127.203111 35.765445 90.011905 
 127.203222 35.765445 87.468266 
 127.201889 35.765556 90.621164 
 127.202000 35.765556 90.523589 
 127.202111 35.765556 90.578414 
 127.202222 35.765556 89.397267 
 127.202333 35.765556 89.376109 
 127.202444 35.765556 90.561323 
 127.202556 35.765556 90.649713 
 127.202667 35.765556 90.649209 
 127.202778 35.765556 89.799248 
 127.202889 35.765556 89.372391 
 127.203000 35.765556 89.392621 
 127.203111 35.765556 89.375385 
 127.203222 35.765556 87.337315 
 127.201889 35.765667 90.307381 
 127.202000 35.765667 90.415989 
 127.202111 35.765667 90.649575 
 127.202222 35.765667 90.083798 
 127.202333 35.765667 89.440641 
 127.202444 35.765667 90.511349 
 127.202556 35.765667 90.649867 
 127.202667 35.765667 90.650151 
 127.202778 35.765667 90.018382 
 127.202889 35.765667 89.359168 
 127.203000 35.765667 89.372844 
 127.203111 35.765667 89.213806 
 127.203222 35.765667 87.330967 
 127.202000 35.765667 90.415989 
 127.202111 35.765667 90.649575 
 127.202222 35.765667 90.083798 
 127.202333 35.765667 89.440641 
 127.202444 35.765667 90.511349 
 127.202556 35.765667 90.649867 
 127.202667 35.765667 90.650151 
 127.202778 35.765667 90.018382 
 127.202889 35.765667 89.359168 
 127.203000 35.765667 89.372844 
 127.203111 35.765667 89.213806 
 127.203222 35.765667 87.330967 
 127.203333 35.765667 87.335827 
 127.202000 35.765778 90.620390 
 127.202111 35.765778 92.184882 
 127.202222 35.765778 92.153628 
 127.202333 35.765778 90.502824 
 127.202444 35.765778 90.648331 
 127.202556 35.765778 90.650728 
 127.202667 35.765778 90.658087 
 127.202778 35.765778 90.430889 
 127.202889 35.765778 89.439667 
 127.203000 35.765778 89.374134 
 127.203111 35.765778 89.341884 
 127.203222 35.765778 87.341732 
 127.203333 35.765778 89.399645 
 127.202000 35.765889 90.653259 
 127.202111 35.765889 94.375698 
 127.202222 35.765889 94.788401 
 127.202333 35.765889 92.228068 
 127.202444 35.765889 91.295296 
 127.202556 35.765889 90.717942 
 127.202667 35.765889 91.161861 
 127.202778 35.765889 92.288521 
 127.202889 35.765889 92.214403 
 127.203000 35.765889 90.085097 
 127.203111 35.765889 90.081480 
 127.203222 35.765889 89.406058 
 127.203333 35.765889 94.381345 
 127.202111 35.765889 94.375698 
 127.202222 35.765889 94.788401 
 127.202333 35.765889 92.228068 
 127.202444 35.765889 91.295296 
 127.202556 35.765889 90.717942 
 127.202667 35.765889 91.161861 
 127.202778 35.765889 92.288521 
 127.202889 35.765889 92.214403 
 127.203000 35.765889 90.085097 
 127.203111 35.765889 90.081480 
 127.203222 35.765889 89.406058 
 127.203333 35.765889 94.381345 
 127.203444 35.765889 95.860729 
 127.202111 35.766000 96.520854 
 127.202222 35.766000 96.865352 
 127.202333 35.766000 95.816651 
 127.202444 35.766000 92.224349 
 127.202556 35.766000 92.155081 
 127.202667 35.766000 92.157195 
 127.202778 35.766000 96.507637 
 127.202889 35.766000 98.254559 
 127.203000 35.766000 94.679896 
 127.203111 35.766000 94.372288 
 127.203222 35.766000 95.436269 
 127.203333 35.766000 98.264168 
 127.203444 35.766000 96.488850 
 127.202111 35.766111 97.901526 
 127.202222 35.766111 98.226337 
 127.202333 35.766111 98.255285 
 127.202444 35.766111 96.506635 
 127.202556 35.766111 95.846083 
 127.202667 35.766111 95.340980 
 127.202778 35.766111 99.803375 
 127.202889 35.766111 101.388061 
 127.203000 35.766111 102.159589 
 127.203111 35.766111 102.150981 
 127.203222 35.766111 100.183043 
 127.203333 35.766111 99.575565 
 127.203444 35.766111 96.506437 
 127.202222 35.766111 98.226337 
 127.202333 35.766111 98.255285 
 127.202444 35.766111 96.506635 
 127.202556 35.766111 95.846083 
 127.202667 35.766111 95.340980 
 127.202778 35.766111 99.803375 
 127.202889 35.766111 101.388061 
 127.203000 35.766111 102.159589 
 127.203111 35.766111 102.150981 
 127.203222 35.766111 100.183043 
 127.203333 35.766111 99.575565 
 127.203444 35.766111 96.506437 
 127.203556 35.766111 97.899726 
 127.202222 35.766222 100.176812 
 127.202333 35.766222 103.475339 
 127.202444 35.766222 104.222244 
 127.202556 35.766222 101.299390 
 127.202667 35.766222 99.505782 
 127.202778 35.766222 101.389815 
 127.202889 35.766222 102.654630 
 127.203000 35.766222 103.928935 
 127.203111 35.766222 104.120640 
 127.203222 35.766222 102.652827 
 127.203333 35.766222 100.326600 
 127.203444 35.766222 97.023190 
 127.203556 35.766222 103.497942 
 127.202222 35.766333 101.634190 
 127.202333 35.766333 109.594903 
 127.202444 35.766333 112.032623 
 127.202556 35.766333 106.155708 
 127.202667 35.766333 102.663441 
 127.202778 35.766333 102.664819 
 127.202889 35.766333 103.458861 
 127.203000 35.766333 104.137593 
 127.203111 35.766333 104.981561 
 127.203222 35.766333 106.246717 
 127.203333 35.766333 103.110000 
 127.203444 35.766333 102.157970 
 127.203556 35.766333 108.724816 
 127.202333 35.766333 109.594903 
 127.202444 35.766333 112.032623 
 127.202556 35.766333 106.155708 
 127.202667 35.766333 102.663441 
 127.202778 35.766333 102.664819 
 127.202889 35.766333 103.458861 
 127.203000 35.766333 104.137593 
 127.203111 35.766333 104.981561 
 127.203222 35.766333 106.246717 
 127.203333 35.766333 103.110000 
 127.203444 35.766333 102.157970 
 127.203556 35.766333 108.724816 
 127.203667 35.766333 107.543600 
 127.202333 35.766445 114.343828 
 127.202444 35.766445 114.397335 
 127.202556 35.766445 107.615837 
 127.202667 35.766445 103.932194 
 127.202778 35.766445 103.500127 
 127.202889 35.766445 103.497436 
 127.203000 35.766445 104.136109 
 127.203111 35.766445 105.455830 
 127.203222 35.766445 106.355095 
 127.203333 35.766445 105.082014 
 127.203444 35.766445 104.007541 
 127.203556 35.766445 109.838249 
 127.203667 35.766445 106.354216 
 127.202333 35.766556 116.224987 
 127.202444 35.766556 115.922207 
 127.202556 35.766556 109.600558 
 127.202667 35.766556 105.518512 
 127.202778 35.766556 104.174682 
 127.202889 35.766556 103.912616 
 127.203000 35.766556 104.134497 
 127.203111 35.766556 104.568070 
 127.203222 35.766556 106.353947 
 127.203333 35.766556 104.073948 
 127.203444 35.766556 102.159890 
 127.203556 35.766556 107.658730 
 127.203667 35.766556 105.517438 
 127.202444 35.766556 115.922207 
 127.202556 35.766556 109.600558 
 127.202667 35.766556 105.518512 
 127.202778 35.766556 104.174682 
 127.202889 35.766556 103.912616 
 127.203000 35.766556 104.134497 
 127.203111 35.766556 104.568070 
 127.203222 35.766556 106.353947 
 127.203333 35.766556 104.073948 
 127.203444 35.766556 102.159890 
 127.203556 35.766556 107.658730 
 127.203667 35.766556 105.517438 
 127.203778 35.766556 100.183346 
 127.202444 35.766667 116.392234 
 127.202556 35.766667 112.033423 
 127.202667 35.766667 107.650770 
 127.202778 35.766667 106.371431 
 127.202889 35.766667 104.647207 
 127.203000 35.766667 104.133097 
 127.203111 35.766667 104.132035 
 127.203222 35.766667 105.514622 
 127.203333 35.766667 101.295828 
 127.203444 35.766667 97.709826 
 127.203556 35.766667 102.652912 
 127.203667 35.766667 102.686781 
 127.203778 35.766667 98.255570 
 127.202444 35.766778 116.784432 
 127.202556 35.766778 114.577211 
 127.202667 35.766778 111.780421 
 127.202778 35.766778 109.596034 
 127.202889 35.766778 106.354056 
 127.203000 35.766778 103.520471 
 127.203111 35.766778 103.496110 
 127.203222 35.766778 103.493665 
 127.203333 35.766778 98.252562 
 127.203444 35.766778 95.857812 
 127.203556 35.766778 96.508300 
 127.203667 35.766778 96.869918 
 127.203778 35.766778 96.867226 
 127.202556 35.766778 114.577211 
 127.202667 35.766778 111.780421 
 127.202778 35.766778 109.596034 
 127.202889 35.766778 106.354056 
 127.203000 35.766778 103.520471 
 127.203111 35.766778 103.496110 
 127.203222 35.766778 103.493665 
 127.203333 35.766778 98.252562 
 127.203444 35.766778 95.857812 
 127.203556 35.766778 96.508300 
 127.203667 35.766778 96.869918 
 127.203778 35.766778 96.867226 
 127.203889 35.766778 95.858784 
 127.202556 35.766889 114.358521 
 127.202667 35.766889 112.165289 
 127.202778 35.766889 112.015586 
 127.202889 35.766889 107.529251 
 127.203000 35.766889 102.079605 
 127.203111 35.766889 102.708589 
 127.203222 35.766889 102.159068 
 127.203333 35.766889 94.726749 
 127.203444 35.766889 94.368785 
 127.203556 35.766889 93.094609 
 127.203667 35.766889 94.371587 
 127.203778 35.766889 94.931365 
 127.203889 35.766889 93.045975 
 127.202556 35.767000 114.344180 
 127.202667 35.767000 112.533602 
 127.202778 35.767000 112.082323 
 127.202889 35.767000 106.295954 
 127.203000 35.767000 97.901581 
 127.203111 35.767000 99.508935 
 127.203222 35.767000 97.736232 
 127.203333 35.767000 91.012966 
 127.203444 35.767000 92.118147 
 127.203556 35.767000 90.091425 
 127.203667 35.767000 90.651481 
 127.203778 35.767000 92.151144 
 127.203889 35.767000 90.031088 
 127.202667 35.767000 112.533602 
 127.202778 35.767000 112.082323 
 127.202889 35.767000 106.295954 
 127.203000 35.767000 97.901581 
 127.203111 35.767000 99.508935 
 127.203222 35.767000 97.736232 
 127.203333 35.767000 91.012966 
 127.203444 35.767000 92.118147 
 127.203556 35.767000 90.091425 
 127.203667 35.767000 90.651481 
 127.203778 35.767000 92.151144 
 127.203889 35.767000 90.031088 
 127.204000 35.767000 84.988836 
 127.202667 35.767111 112.532988 
 127.202778 35.767111 112.030597 
 127.202889 35.767111 102.666687 
 127.203000 35.767111 96.023931 
 127.203111 35.767111 96.865050 
 127.203222 35.767111 93.337996 
 127.203333 35.767111 89.411617 
 127.203444 35.767111 89.651991 
 127.203556 35.767111 89.371764 
 127.203667 35.767111 89.358423 
 127.203778 35.767111 89.374972 
 127.203889 35.767111 86.634760 
 127.204000 35.767111 84.732000 
 127.202667 35.767222 112.214410 
 127.202778 35.767222 109.605617 
 127.202889 35.767222 98.255710 
 127.203000 35.767222 94.499053 
 127.203111 35.767222 94.371888 
 127.203222 35.767222 90.082677 
 127.203333 35.767222 89.065516 
 127.203444 35.767222 89.047381 
 127.203556 35.767222 87.413884 
 127.203667 35.767222 86.630364 
 127.203778 35.767222 86.623157 
 127.203889 35.767222 86.691318 
 127.204000 35.767222 84.726554 
 127.202778 35.767222 109.605617 
 127.202889 35.767222 98.255710 
 127.203000 35.767222 94.499053 
 127.203111 35.767222 94.371888 
 127.203222 35.767222 90.082677 
 127.203333 35.767222 89.065516 
 127.203444 35.767222 89.047381 
 127.203556 35.767222 87.413884 
 127.203667 35.767222 86.630364 
 127.203778 35.767222 86.623157 
 127.203889 35.767222 86.691318 
 127.204000 35.767222 84.726554 
 127.204111 35.767222 83.771052 
 127.202778 35.767333 104.145682 
 127.202889 35.767333 94.259197 
 127.203000 35.767333 92.283920 
 127.203111 35.767333 92.153422 
 127.203222 35.767333 87.373674 
 127.203333 35.767333 87.340616 
 127.203444 35.767333 87.341954 
 127.203556 35.767333 87.265148 
 127.203667 35.767333 86.708259 
 127.203778 35.767333 85.055771 
 127.203889 35.767333 84.987767 
 127.204000 35.767333 84.676045 
 127.204111 35.767333 83.412860 
 127.202778 35.767444 96.505148 
 127.202889 35.767444 89.964104 
 127.203000 35.767444 90.084337 
 127.203111 35.767444 89.384996 
 127.203222 35.767444 86.739791 
 127.203333 35.767444 86.655932 
 127.203444 35.767444 86.628154 
 127.203556 35.767444 86.739347 
 127.203667 35.767444 84.728062 
 127.203778 35.767444 84.726485 
 127.203889 35.767444 84.724643 
 127.204000 35.767444 83.953526 
 127.204111 35.767444 83.343793 
 127.202778 35.767555 90.082456 
 127.202889 35.767555 86.623146 
 127.203000 35.767555 87.153968 
 127.203111 35.767555 86.698491 
 127.203222 35.767555 84.988956 
 127.203333 35.767555 84.988994 
 127.203444 35.767555 84.990414 
 127.203556 35.767555 84.988865 
 127.203667 35.767555 83.331407 
 127.203778 35.767555 83.219260 
 127.203889 35.767555 83.344554 
 127.204000 35.767555 83.394806 
 127.204111 35.767555 83.187931 
 127.202889 35.767555 86.623146 
 127.203000 35.767555 87.153968 
 127.203111 35.767555 86.698491 
 127.203222 35.767555 84.988956 
 127.203333 35.767555 84.988994 
 127.203444 35.767555 84.990414 
 127.203556 35.767555 84.988865 
 127.203667 35.767555 83.331407 
 127.203778 35.767555 83.219260 
 127.203889 35.767555 83.344554 
 127.204000 35.767555 83.394806 
 127.204111 35.767555 83.187931 
 127.204222 35.767555 80.934101 
 127.202889 35.767667 86.659212 
 127.203000 35.767667 86.736786 
 127.203111 35.767667 84.988971 
 127.203222 35.767667 84.830925 
 127.203333 35.767667 84.789642 
 127.203444 35.767667 84.981022 
 127.203556 35.767667 84.732403 
 127.203667 35.767667 83.187748 
 127.203778 35.767667 83.187734 
 127.203889 35.767667 83.342610 
 127.204000 35.767667 83.347829 
 127.204111 35.767667 82.331702 
 127.204222 35.767667 80.071031 
 127.202889 35.767778 85.004714 
 127.203000 35.767778 84.990223 
 127.203111 35.767778 84.765760 
 127.203222 35.767778 84.726424 
 127.203333 35.767778 84.706740 
 127.203444 35.767778 84.728122 
 127.203556 35.767778 84.656606 
 127.203667 35.767778 83.173919 
 127.203778 35.767778 83.187805 
 127.203889 35.767778 83.587546 
 127.204000 35.767778 83.350956 
 127.204111 35.767778 80.940631 
 127.204222 35.767778 79.793092 
 127.203000 35.767778 84.990223 
 127.203111 35.767778 84.765760 
 127.203222 35.767778 84.726424 
 127.203333 35.767778 84.706740 
 127.203444 35.767778 84.728122 
 127.203556 35.767778 84.656606 
 127.203667 35.767778 83.173919 
 127.203778 35.767778 83.187805 
 127.203889 35.767778 83.587546 
 127.204000 35.767778 83.350956 
 127.204111 35.767778 80.940631 
 127.204222 35.767778 79.793092 
 127.204333 35.767778 79.762116 
 127.203000 35.767889 84.988876 
 127.203111 35.767889 83.610205 
 127.203222 35.767889 83.341139 
 127.203333 35.767889 83.197204 
 127.203444 35.767889 83.344702 
 127.203556 35.767889 83.187977 
 127.203667 35.767889 82.331846 
 127.203778 35.767889 83.342955 
 127.203889 35.767889 84.732365 
 127.204000 35.767889 84.460693 
 127.204111 35.767889 80.319458 
 127.204222 35.767889 79.764727 
 127.204333 35.767889 79.770790 
 127.203000 35.768000 84.729261 
 127.203111 35.768000 83.187399 
 127.203222 35.768000 82.338981 
 127.203333 35.768000 82.323896 
 127.203444 35.768000 82.331454 
 127.203556 35.768000 81.455091 
 127.203667 35.768000 81.455157 
 127.203778 35.768000 84.499952 
 127.203889 35.768000 84.986916 
 127.204000 35.768000 84.722045 
 127.204111 35.768000 80.248135 
 127.204222 35.768000 79.765279 
 127.204333 35.768000 80.073540 
 127.203111 35.768000 83.187399 
 127.203222 35.768000 82.338981 
 127.203333 35.768000 82.323896 
 127.203444 35.768000 82.331454 
 127.203556 35.768000 81.455091 
 127.203667 35.768000 81.455157 
 127.203778 35.768000 84.499952 
 127.203889 35.768000 84.986916 
 127.204000 35.768000 84.722045 
 127.204111 35.768000 80.248135 
 127.204222 35.768000 79.765279 
 127.204333 35.768000 80.073540 
 127.204444 35.768000 81.455421 
 127.203111 35.768111 81.475109 
 127.203222 35.768111 81.455245 
 127.203333 35.768111 80.932005 
 127.203444 35.768111 80.355640 
 127.203556 35.768111 79.991679 
 127.203667 35.768111 80.321006 
 127.203778 35.768111 84.708790 
 127.203889 35.768111 84.913918 
 127.204000 35.768111 83.342634 
 127.204111 35.768111 80.318359 
 127.204222 35.768111 80.023607 
 127.204333 35.768111 80.916632 
 127.204444 35.768111 81.804379 
 127.203111 35.768222 80.931248 
 127.203222 35.768222 80.926924 
 127.203333 35.768222 80.803591 
 127.203444 35.768222 79.987300 
 127.203556 35.768222 79.474296 
 127.203667 35.768222 79.998232 
 127.203778 35.768222 83.343393 
 127.203889 35.768222 83.356999 
 127.204000 35.768222 82.300145 
 127.204111 35.768222 80.334283 
 127.204222 35.768222 80.348642 
 127.204333 35.768222 81.455408 
 127.204444 35.768222 82.301254 
 127.203222 35.768222 80.926924 
 127.203333 35.768222 80.803591 
 127.203444 35.768222 79.987300 
 127.203556 35.768222 79.474296 
 127.203667 35.768222 79.998232 
 127.203778 35.768222 83.343393 
 127.203889 35.768222 83.356999 
 127.204000 35.768222 82.300145 
 127.204111 35.768222 80.334283 
 127.204222 35.768222 80.348642 
 127.204333 35.768222 81.455408 
 127.204444 35.768222 82.301254 
 127.204556 35.768222 82.332273 
 127.203222 35.768333 80.803800 
 127.203333 35.768333 80.322841 
 127.203444 35.768333 79.764911 
 127.203556 35.768333 79.468563 
 127.203667 35.768333 79.765038 
 127.203778 35.768333 82.331912 
 127.203889 35.768333 82.327772 
 127.204000 35.768333 80.322656 
 127.204111 35.768333 80.317916 
 127.204222 35.768333 80.803822 
 127.204333 35.768333 81.487134 
 127.204444 35.768333 82.325628 
 127.204556 35.768333 82.334228 
 127.203222 35.768444 80.803788 
 127.203333 35.768444 80.318019 
 127.203444 35.768444 79.764896 
 127.203556 35.768444 79.474276 
 127.203667 35.768444 79.764873 
 127.203778 35.768444 80.803788 
 127.203889 35.768444 80.327838 
 127.204000 35.768444 79.951627 
 127.204111 35.768444 80.247505 
 127.204222 35.768444 80.807563 
 127.204333 35.768444 81.556290 
 127.204444 35.768444 82.327862 
 127.204556 35.768444 82.336323 
 127.203333 35.768444 80.318019 
 127.203444 35.768444 79.764896 
 127.203556 35.768444 79.474276 
 127.203667 35.768444 79.764873 
 127.203778 35.768444 80.803788 
 127.203889 35.768444 80.327838 
 127.204000 35.768444 79.951627 
 127.204111 35.768444 80.247505 
 127.204222 35.768444 80.807563 
 127.204333 35.768444 81.556290 
 127.204444 35.768444 82.327862 
 127.204556 35.768444 82.336323 
 127.204667 35.768444 82.358233 
 127.203333 35.768555 80.317765 
 127.203444 35.768555 79.806287 
 127.203556 35.768555 79.764972 
 127.203667 35.768555 79.789555 
 127.203778 35.768555 80.010107 
 127.203889 35.768555 79.989331 
 127.204000 35.768555 79.751852 
 127.204111 35.768555 80.070212 
 127.204222 35.768555 80.803791 
 127.204333 35.768555 81.462205 
 127.204444 35.768555 82.304162 
 127.204556 35.768555 82.332991 
 127.204667 35.768555 82.332146 
 127.203333 35.768667 80.316492 
 127.203444 35.768667 79.998907 
 127.203556 35.768667 79.998492 
 127.203667 35.768667 79.994311 
 127.203778 35.768667 79.989490 
 127.203889 35.768667 79.765966 
 127.204000 35.768667 79.764643 
 127.204111 35.768667 80.011999 
 127.204222 35.768667 80.317872 
 127.204333 35.768667 80.949963 
 127.204444 35.768667 81.464917 
 127.204556 35.768667 82.330762 
 127.204667 35.768667 82.165465 
 127.203444 35.768667 79.998907 
 127.203556 35.768667 79.998492 
 127.203667 35.768667 79.994311 
 127.203778 35.768667 79.989490 
 127.203889 35.768667 79.765966 
 127.204000 35.768667 79.764643 
 127.204111 35.768667 80.011999 
 127.204222 35.768667 80.317872 
 127.204333 35.768667 80.949963 
 127.204444 35.768667 81.464917 
 127.204556 35.768667 82.330762 
 127.204667 35.768667 82.165465 
 127.204778 35.768667 81.455225 
 127.203444 35.768778 80.072102 
 127.203556 35.768778 80.070731 
 127.203667 35.768778 80.013733 
 127.203778 35.768778 79.989540 
 127.203889 35.768778 79.969073 
 127.204000 35.768778 79.980947 
 127.204111 35.768778 79.998658 
 127.204222 35.768778 80.070206 
 127.204333 35.768778 80.320829 
 127.204444 35.768778 80.930536 
 127.204556 35.768778 81.460312 
 127.204667 35.768778 81.455043 
 127.204778 35.768778 80.863000 
 127.203444 35.768889 80.247379 
 127.203556 35.768889 80.246987 
 127.203667 35.768889 80.070202 
 127.203778 35.768889 79.997991 
 127.203889 35.768889 79.991797 
 127.204000 35.768889 79.998116 
 127.204111 35.768889 79.998574 
 127.204222 35.768889 80.012310 
 127.204333 35.768889 80.070198 
 127.204444 35.768889 80.293482 
 127.204556 35.768889 80.931034 
 127.204667 35.768889 80.841223 
 127.204778 35.768889 80.689755 
 127.203556 35.768889 80.246987 
 127.203667 35.768889 80.070202 
 127.203778 35.768889 79.997991 
 127.203889 35.768889 79.991797 
 127.204000 35.768889 79.998116 
 127.204111 35.768889 79.998574 
 127.204222 35.768889 80.012310 
 127.204333 35.768889 80.070198 
 127.204444 35.768889 80.293482 
 127.204556 35.768889 80.931034 
 127.204667 35.768889 80.841223 
 127.204778 35.768889 80.689755 
 127.204889 35.768889 80.070335 
 127.203556 35.769000 80.247584 
 127.203667 35.769000 80.082769 
 127.203778 35.769000 80.013183 
 127.203889 35.769000 80.013185 
 127.204000 35.769000 80.006459 
 127.204111 35.769000 79.998629 
 127.204222 35.769000 79.999562 
 127.204333 35.769000 80.012714 
 127.204444 35.769000 80.070176 
 127.204556 35.769000 80.660209 
 127.204667 35.769000 80.795618 
 127.204778 35.769000 80.317843 
 127.204889 35.769000 80.069040 
 127.203556 35.769111 80.247887 
 127.203667 35.769111 80.213343 
 127.203778 35.769111 80.070184 
 127.203889 35.769111 80.070184 
 127.204000 35.769111 80.014259 
 127.204111 35.769111 79.999006 
 127.204222 35.769111 79.998887 
 127.204333 35.769111 80.002183 
 127.204444 35.769111 80.013620 
 127.204556 35.769111 80.247558 
 127.204667 35.769111 80.318227 
 127.204778 35.769111 80.247743 
 127.204889 35.769111 80.017557 
 127.203667 35.769111 80.213343 
 127.203778 35.769111 80.070184 
 127.203889 35.769111 80.070184 
 127.204000 35.769111 80.014259 
 127.204111 35.769111 79.999006 
 127.204222 35.769111 79.998887 
 127.204333 35.769111 80.002183 
 127.204444 35.769111 80.013620 
 127.204556 35.769111 80.247558 
 127.204667 35.769111 80.318227 
 127.204778 35.769111 80.247743 
 127.204889 35.769111 80.017557 
 127.205000 35.769111 80.013434 
 127.203667 35.769222 80.226169 
 127.203778 35.769222 80.070896 
 127.203889 35.769222 80.070539 
 127.204000 35.769222 80.067948 
 127.204111 35.769222 80.001007 
 127.204222 35.769222 79.998967 
 127.204333 35.769222 80.001414 
 127.204444 35.769222 80.004913 
 127.204556 35.769222 80.022726 
 127.204667 35.769222 80.246154 
 127.204778 35.769222 80.093750 
 127.204889 35.769222 80.013842 
 127.205000 35.769222 80.013573 
 127.203667 35.769333 80.174212 
 127.203778 35.769333 80.074046 
 127.203889 35.769333 80.071316 
 127.204000 35.769333 80.070100 
 127.204111 35.769333 80.002880 
 127.204222 35.769333 79.999271 
 127.204333 35.769333 80.010116 
 127.204444 35.769333 79.999914 
 127.204556 35.769333 79.997439 
 127.204667 35.769333 80.013803 
 127.204778 35.769333 80.060228 
 127.204889 35.769333 80.013485 
 127.205000 35.769333 80.014082 
 127.203667 35.769444 80.102771 
 127.203778 35.769444 80.073875 
 127.203889 35.769444 80.070374 
 127.204000 35.769444 80.059217 
 127.204111 35.769444 80.001655 
 127.204222 35.769444 79.999923 
 127.204333 35.769444 80.013919 
 127.204444 35.769444 80.012577 
 127.204556 35.769444 79.989617 
 127.204667 35.769444 79.997827 
 127.204778 35.769444 80.011328 
 127.204889 35.769444 80.012395 
 127.205000 35.769444 80.069841 
 127.203778 35.769444 80.073875 
 127.203889 35.769444 80.070374 
 127.204000 35.769444 80.059217 
 127.204111 35.769444 80.001655 
 127.204222 35.769444 79.999923 
 127.204333 35.769444 80.013919 
 127.204444 35.769444 80.012577 
 127.204556 35.769444 79.989617 
 127.204667 35.769444 79.997827 
 127.204778 35.769444 80.011328 
 127.204889 35.769444 80.012395 
 127.205000 35.769444 80.069841 
 127.205111 35.769444 80.803463 
 127.203778 35.769555 80.071330 
 127.203889 35.769555 80.070141 
 127.204000 35.769555 80.013677 
 127.204111 35.769555 79.999359 
 127.204222 35.769555 80.000731 
 127.204333 35.769555 80.056600 
 127.204444 35.769555 80.027094 
 127.204556 35.769555 79.990744 
 127.204667 35.769555 79.994361 
 127.204778 35.769555 79.999732 
 127.204889 35.769555 80.007582 
 127.205000 35.769555 80.136918 
 127.205111 35.769555 80.893927 
 127.203778 35.769667 80.070262 
 127.203889 35.769667 80.014110 
 127.204000 35.769667 80.002151 
 127.204111 35.769667 79.998536 
 127.204222 35.769667 79.999086 
 127.204333 35.769667 80.069295 
 127.204444 35.769667 80.070145 
 127.204556 35.769667 79.998528 
 127.204667 35.769667 79.998481 
 127.204778 35.769667 79.999126 
 127.204889 35.769667 80.000494 
 127.205000 35.769667 80.247535 
 127.205111 35.769667 80.930732 
 127.203889 35.769667 80.014110 
 127.204000 35.769667 80.002151 
 127.204111 35.769667 79.998536 
 127.204222 35.769667 79.999086 
 127.204333 35.769667 80.069295 
 127.204444 35.769667 80.070145 
 127.204556 35.769667 79.998528 
 127.204667 35.769667 79.998481 
 127.204778 35.769667 79.999126 
 127.204889 35.769667 80.000494 
 127.205000 35.769667 80.247535 
 127.205111 35.769667 80.930732 
 127.205222 35.769667 80.950235 
 127.203889 35.769778 80.008696 
 127.204000 35.769778 79.998572 
 127.204111 35.769778 79.997712 
 127.204222 35.769778 79.998215 
 127.204333 35.769778 80.015589 
 127.204444 35.769778 80.070125 
 127.204556 35.769778 80.013482 
 127.204667 35.769778 80.008770 
 127.204778 35.769778 79.999480 
 127.204889 35.769778 79.998621 
 127.205000 35.769778 80.247397 
 127.205111 35.769778 80.929237 
 127.205222 35.769778 80.943677 
 127.203889 35.769889 79.999143 
 127.204000 35.769889 79.998477 
 127.204111 35.769889 79.990330 
 127.204222 35.769889 79.989469 
 127.204333 35.769889 79.996743 
 127.204444 35.769889 80.013526 
 127.204556 35.769889 80.014061 
 127.204667 35.769889 80.013658 
 127.204778 35.769889 80.000045 
 127.204889 35.769889 79.998453 
 127.205000 35.769889 80.097702 
 127.205111 35.769889 80.824919 
 127.205222 35.769889 80.934408 
 127.204000 35.769889 79.998477 
 127.204111 35.769889 79.990330 
 127.204222 35.769889 79.989469 
 127.204333 35.769889 79.996743 
 127.204444 35.769889 80.013526 
 127.204556 35.769889 80.014061 
 127.204667 35.769889 80.013658 
 127.204778 35.769889 80.000045 
 127.204889 35.769889 79.998453 
 127.205000 35.769889 80.097702 
 127.205111 35.769889 80.824919 
 127.205222 35.769889 80.934408 
 127.205333 35.769889 80.930899 
 127.204000 35.770000 79.998200 
 127.204111 35.770000 79.989534 
 127.204222 35.770000 79.940361 
 127.204333 35.770000 79.765036 
 127.204444 35.770000 79.988215 
 127.204556 35.770000 80.010071 
 127.204667 35.770000 80.013366 
 127.204778 35.770000 79.998851 
 127.204889 35.770000 79.997361 
 127.205000 35.770000 80.070174 
 127.205111 35.770000 80.803788 
 127.205222 35.770000 80.931010 
 127.205333 35.770000 80.803815 
 127.204000 35.770111 79.995805 
 127.204111 35.770111 79.989266 
 127.204222 35.770111 79.765045 
 127.204333 35.770111 79.475431 
 127.204444 35.770111 79.742136 
 127.204556 35.770111 79.996028 
 127.204667 35.770111 79.998633 
 127.204778 35.770111 79.998119 
 127.204889 35.770111 79.992341 
 127.205000 35.770111 80.013720 
 127.205111 35.770111 80.317833 
 127.205222 35.770111 80.803783 
 127.205333 35.770111 80.771724 
 127.204111 35.770111 79.989266 
 127.204222 35.770111 79.765045 
 127.204333 35.770111 79.475431 
 127.204444 35.770111 79.742136 
 127.204556 35.770111 79.996028 
 127.204667 35.770111 79.998633 
 127.204778 35.770111 79.998119 
 127.204889 35.770111 79.992341 
 127.205000 35.770111 80.013720 
 127.205111 35.770111 80.317833 
 127.205222 35.770111 80.803783 
 127.205333 35.770111 80.771724 
 127.205444 35.770111 80.322495 
 127.204111 35.770222 79.982579 
 127.204222 35.770222 79.753544 
 127.204333 35.770222 79.471403 
 127.204444 35.770222 79.474150 
 127.204556 35.770222 79.930209 
 127.204667 35.770222 79.989406 
 127.204778 35.770222 79.989157 
 127.204889 35.770222 79.989916 
 127.205000 35.770222 79.998775 
 127.205111 35.770222 80.014511 
 127.205222 35.770222 80.202815 
 127.205333 35.770222 80.322361 
 127.205444 35.770222 80.318903 
 127.204111 35.770333 79.766495 
 127.204222 35.770333 79.474703 
 127.204333 35.770333 79.407350 
 127.204444 35.770333 79.452581 
 127.204556 35.770333 79.764615 
 127.204667 35.770333 79.765177 
 127.204778 35.770333 79.766324 
 127.204889 35.770333 79.990218 
 127.205000 35.770333 79.998393 
 127.205111 35.770333 79.989282 
 127.205222 35.770333 79.998461 
 127.205333 35.770333 80.317352 
 127.205444 35.770333 80.317623 
 127.204222 35.770333 79.474703 
 127.204333 35.770333 79.407350 
 127.204444 35.770333 79.452581 
 127.204556 35.770333 79.764615 
 127.204667 35.770333 79.765177 
 127.204778 35.770333 79.766324 
 127.204889 35.770333 79.990218 
 127.205000 35.770333 79.998393 
 127.205111 35.770333 79.989282 
 127.205222 35.770333 79.998461 
 127.205333 35.770333 80.317352 
 127.205444 35.770333 80.317623 
 127.205556 35.770333 80.246753 
 127.204222 35.770444 79.472577 
 127.204333 35.770444 79.229125 
 127.204444 35.770444 79.182931 
 127.204556 35.770444 79.483490 
 127.204667 35.770444 79.764040 
 127.204778 35.770444 79.765005 
 127.204889 35.770444 79.998322 
 127.205000 35.770444 79.998673 
 127.205111 35.770444 79.983003 
 127.205222 35.770444 79.989503 
 127.205333 35.770444 80.171174 
 127.205444 35.770444 80.228468 
 127.205556 35.770444 80.104774 
 127.204222 35.770556 79.404505 
 127.204333 35.770556 79.093223 
 127.204444 35.770556 79.076396 
 127.204556 35.770556 79.473871 
 127.204667 35.770556 79.727544 
 127.204778 35.770556 79.765006 
 127.204889 35.770556 80.000547 
 127.205000 35.770556 80.012989 
 127.205111 35.770556 79.989671 
 127.205222 35.770556 79.996369 
 127.205333 35.770556 80.011785 
 127.205444 35.770556 80.014022 
 127.205556 35.770556 80.073201 
 127.204333 35.770556 79.093223 
 127.204444 35.770556 79.076396 
 127.204556 35.770556 79.473871 
 127.204667 35.770556 79.727544 
 127.204778 35.770556 79.765006 
 127.204889 35.770556 80.000547 
 127.205000 35.770556 80.012989 
 127.205111 35.770556 79.989671 
 127.205222 35.770556 79.996369 
 127.205333 35.770556 80.011785 
 127.205444 35.770556 80.014022 
 127.205556 35.770556 80.073201 
 127.205667 35.770556 80.149628 
 127.204333 35.770667 79.074782 
 127.204444 35.770667 79.073872 
 127.204556 35.770667 79.354538 
 127.204667 35.770667 79.586153 
 127.204778 35.770667 79.766775 
 127.204889 35.770667 80.013028 
 127.205000 35.770667 80.013988 
 127.205111 35.770667 80.001690 
 127.205222 35.770667 80.005140 
 127.205333 35.770667 79.997956 
 127.205444 35.770667 79.998614 
 127.205556 35.770667 80.071945 
 127.205667 35.770667 80.247361 
 127.204333 35.770778 79.073518 
 127.204444 35.770778 79.072480 
 127.204556 35.770778 79.079550 
 127.204667 35.770778 79.481194 
 127.204778 35.770778 79.989445 
 127.204889 35.770778 80.014118 
 127.205000 35.770778 80.014594 
 127.205111 35.770778 80.013716 
 127.205222 35.770778 80.013572 
 127.205333 35.770778 79.995570 
 127.205444 35.770778 79.997927 
 127.205556 35.770778 80.074130 
 127.205667 35.770778 80.318462 
 127.204444 35.770778 79.072480 
 127.204556 35.770778 79.079550 
 127.204667 35.770778 79.481194 
 127.204778 35.770778 79.989445 
 127.204889 35.770778 80.014118 
 127.205000 35.770778 80.014594 
 127.205111 35.770778 80.013716 
 127.205222 35.770778 80.013572 
 127.205333 35.770778 79.995570 
 127.205444 35.770778 79.997927 
 127.205556 35.770778 80.074130 
 127.205667 35.770778 80.318462 
 127.205778 35.770778 80.884214 
 127.204444 35.770889 79.070530 
 127.204556 35.770889 79.073918 
 127.204667 35.770889 79.474180 
 127.204778 35.770889 79.998421 
 127.204889 35.770889 80.033855 
 127.205000 35.770889 80.013765 
 127.205111 35.770889 80.013565 
 127.205222 35.770889 80.013669 
 127.205333 35.770889 79.997934 
 127.205444 35.770889 79.989435 
 127.205556 35.770889 80.082124 
 127.205667 35.770889 80.803792 
 127.205778 35.770889 80.930999 
 127.204444 35.771000 79.068301 
 127.204556 35.771000 79.070506 
 127.204667 35.771000 79.403828 
 127.204778 35.771000 79.998367 
 127.204889 35.771000 80.057755 
 127.205000 35.771000 80.009619 
 127.205111 35.771000 80.003353 
 127.205222 35.771000 80.013172 
 127.205333 35.771000 79.998542 
 127.205444 35.771000 79.983952 
 127.205556 35.771000 80.246209 
 127.205667 35.771000 80.924694 
 127.205778 35.771000 80.931167 
 127.204444 35.771111 79.064662 
 127.204556 35.771111 79.061084 
 127.204667 35.771111 79.093546 
 127.204778 35.771111 79.989890 
 127.204889 35.771111 80.034618 
 127.205000 35.771111 79.999846 
 127.205111 35.771111 79.998778 
 127.205222 35.771111 80.011915 
 127.205333 35.771111 80.000155 
 127.205444 35.771111 79.988903 
 127.205556 35.771111 80.319995 
 127.205667 35.771111 80.930679 
 127.205778 35.771111 80.931188 
 127.204556 35.771111 79.061084 
 127.204667 35.771111 79.093546 
 127.204778 35.771111 79.989890 
 127.204889 35.771111 80.034618 
 127.205000 35.771111 79.999846 
 127.205111 35.771111 79.998778 
 127.205222 35.771111 80.011915 
 127.205333 35.771111 80.000155 
 127.205444 35.771111 79.988903 
 127.205556 35.771111 80.319995 
 127.205667 35.771111 80.930679 
 127.205778 35.771111 80.931188 
 127.205889 35.771111 80.931123 
 127.204556 35.771222 79.054827 
 127.204667 35.771222 79.080724 
 127.204778 35.771222 79.989390 
 127.204889 35.771222 80.014447 
 127.205000 35.771222 79.998940 
 127.205111 35.771222 79.998666 
 127.205222 35.771222 80.010858 
 127.205333 35.771222 80.003099 
 127.205444 35.771222 79.998495 
 127.205556 35.771222 80.803789 
 127.205667 35.771222 80.929984 
 127.205778 35.771222 80.931127 
 127.205889 35.771222 80.931088 
 127.204556 35.771333 79.059020 
 127.204667 35.771333 79.270572 
 127.204778 35.771333 79.989876 
 127.204889 35.771333 80.013609 
 127.205000 35.771333 79.999194 
 127.205111 35.771333 79.998805 
 127.205222 35.771333 80.008268 
 127.205333 35.771333 79.999236 
 127.205444 35.771333 80.015940
[truncated: 1,774,942 more chars]
