# Supplementary material for: Terrain Referenced Navigation Using a Multilayer Radial Basis Function-Based Extreme Learning Machine
Source: Hindawi journal article supplement (doi:10.1155/2019/9142694), 2019-07-11
Supplement: f1 [file 9142694.f1.zip › 9142694_Supplementary information files/CompareMatchingResults_180909/SVMRTestResult.dat]

127.174444 35.700556 423.589953 
 127.174444 35.700667 422.224600 
 127.174444 35.700778 420.879022 
 127.174556 35.700778 419.382850 
 127.174556 35.700889 418.091939 
 127.174556 35.701000 416.821421 
 127.174556 35.701111 415.567248 
 127.174667 35.701111 414.025315 
 127.174667 35.701222 412.831108 
 127.174667 35.701333 411.653874 
 127.174667 35.701445 410.495918 
 127.174778 35.701445 408.907180 
 127.174778 35.701556 407.809353 
 127.174778 35.701667 406.729143 
 127.174778 35.701778 405.670406 
 127.174889 35.701889 403.034908 
 127.174889 35.702000 402.053546 
 127.174889 35.702111 401.090199 
 127.174889 35.702222 400.148212 
 127.175000 35.702222 398.505302 
 127.175000 35.702333 397.618333 
 127.175000 35.702445 396.750817 
 127.175000 35.702556 395.904145 
 127.175111 35.702556 394.213825 
 127.175111 35.702667 393.420600 
 127.175111 35.702778 392.647568 
 127.175111 35.702889 391.891940 
 127.175222 35.702889 390.148928 
 127.175222 35.703000 389.447201 
 127.175222 35.703111 388.762273 
 127.175222 35.703222 388.095164 
 127.175333 35.703222 386.298917 
 127.175333 35.703333 385.682822 
 127.175333 35.703445 385.082560 
 127.175333 35.703556 384.499927 
 127.175444 35.703556 382.643795 
 127.175444 35.703667 382.107013 
 127.175444 35.703778 381.586682 
 127.175444 35.703889 381.080685 
 127.175556 35.703889 379.163516 
 127.175556 35.704000 378.701681 
 127.175556 35.704111 378.253077 
 127.175556 35.704222 377.818137 
 127.175667 35.704222 375.832631 
 127.175667 35.704333 375.438032 
 127.175667 35.704444 375.055095 
 127.175667 35.704555 374.684723 
 127.175778 35.704555 372.629661 
 127.175778 35.704667 372.294384 
 127.175778 35.704778 371.970206 
 127.175778 35.704889 371.655569 
 127.175889 35.704889 369.523658 
 127.175889 35.705000 369.240768 
 127.175889 35.705111 368.967013 
 127.175889 35.705222 368.700988 
 127.176000 35.705222 366.491804 
 127.176000 35.705333 366.253880 
 127.176000 35.705444 366.022297 
 127.176000 35.705555 365.797380 
 127.176111 35.705555 363.504167 
 127.176111 35.705667 363.302599 
 127.176111 35.705778 363.105874 
 127.176111 35.705889 362.913848 
 127.176222 35.705889 360.537640 
 127.176222 35.706000 360.365170 
 127.176222 35.706111 360.195962 
 127.176222 35.706222 360.028971 
 127.176333 35.706222 357.564242 
 127.176333 35.706333 357.413781 
 127.176333 35.706444 357.264240 
 127.176333 35.706555 357.115691 
 127.176444 35.706555 354.565397 
 127.176444 35.706667 354.429497 
 127.176444 35.706778 354.293093 
 127.176444 35.706889 354.156008 
 127.176556 35.706889 351.516299 
 127.176556 35.707000 351.388866 
 127.176556 35.707111 351.259611 
 127.176556 35.707222 351.127712 
 127.176667 35.707222 348.403931 
 127.176667 35.707333 348.279477 
 127.176667 35.707444 348.151391 
 127.176667 35.707556 348.019550 
 127.176778 35.707556 345.209758 
 127.176778 35.707667 345.083139 
 127.176778 35.707778 344.951702 
 127.176778 35.707889 344.815611 
 127.176889 35.707889 341.927670 
 127.176889 35.708000 341.794554 
 127.176889 35.708111 341.656099 
 127.176889 35.708222 341.511592 
 127.177000 35.708222 338.545604 
 127.177000 35.708333 338.402980 
 127.177000 35.708444 338.254278 
 127.177111 35.708444 335.212856 
 127.177111 35.708556 335.065128 
 127.177111 35.708667 334.910942 
 127.177111 35.708778 334.749626 
 127.177222 35.708778 331.642548 
 127.177222 35.708889 331.482233 
 127.177222 35.709000 331.314561 
 127.177222 35.709111 331.140025 
 127.177333 35.709111 327.979633 
 127.177333 35.709222 327.805456 
 127.177333 35.709333 327.624062 
 127.177333 35.709444 327.435753 
 127.177444 35.709444 324.225470 
 127.177444 35.709556 324.037877 
 127.177444 35.709667 323.843497 
 127.177444 35.709778 323.641690 
 127.177556 35.709778 320.395660 
 127.177556 35.709889 320.196005 
 127.177556 35.710000 319.989187 
 127.177556 35.710111 319.775625 
 127.177667 35.710111 316.498500 
 127.177667 35.710222 316.288254 
 127.177667 35.710333 316.071326 
 127.177667 35.710444 315.848591 
 127.177778 35.710444 312.555704 
 127.177778 35.710556 312.336991 
 127.177778 35.710667 312.113021 
 127.177778 35.710778 311.883196 
 127.177889 35.710778 308.579953 
 127.177889 35.710889 308.356656 
 127.177889 35.711000 308.128169 
 127.178000 35.711111 304.597386 
 127.178000 35.711222 304.372772 
 127.178000 35.711333 304.143936 
 127.178111 35.711333 300.844149 
 127.178111 35.711444 300.625325 
 127.178111 35.711556 300.403105 
 127.178111 35.711667 300.178519 
 127.178222 35.711667 296.904573 
 127.178222 35.711778 296.691411 
 127.178222 35.711889 296.476372 
 127.178222 35.712000 296.260120 
 127.178333 35.712000 293.017321 
 127.178333 35.712111 292.814772 
 127.178333 35.712222 292.611908 
 127.178333 35.712333 292.408332 
 127.178444 35.712333 289.211842 
 127.178444 35.712444 289.024924 
 127.178444 35.712556 288.838265 
 127.178444 35.712667 288.652503 
 127.178556 35.712667 285.506962 
 127.178556 35.712778 285.340075 
 127.178556 35.712889 285.174745 
 127.178667 35.712889 282.076257 
 127.178667 35.713000 281.931292 
 127.178667 35.713111 281.788860 
 127.178667 35.713222 281.649760 
 127.178778 35.713222 278.619143 
 127.178778 35.713333 278.502009 
 127.178778 35.713444 278.389077 
 127.178778 35.713556 278.280261 
 127.178889 35.713556 275.328039 
 127.178889 35.713667 275.243372 
 127.178889 35.713778 275.164026 
 127.178889 35.713889 275.090018 
 127.179000 35.713889 272.225874 
 127.179000 35.714000 272.177858 
 127.179000 35.714111 272.136054 
 127.179111 35.714111 269.341879 
 127.179111 35.714222 269.327126 
 127.179111 35.714333 269.319415 
 127.179111 35.714445 269.319033 
 127.179222 35.714445 266.625466 
 127.179222 35.714556 266.653505 
 127.179222 35.714667 266.689618 
 127.179222 35.714778 266.733910 
 127.179333 35.714778 264.142544 
 127.179333 35.714889 264.216668 
 127.179333 35.715000 264.299531 
 127.179444 35.715000 261.798498 
 127.179444 35.715111 261.911955 
 127.179444 35.715222 262.034872 
 127.179444 35.715333 262.167188 
 127.179556 35.715333 259.778759 
 127.179556 35.715445 259.942725 
 127.179556 35.715556 260.116507 
 127.179556 35.715667 260.300845 
 127.179667 35.715667 258.033599 
 127.179667 35.715778 258.249756 
 127.179667 35.715889 258.476945 
 127.179778 35.715889 256.310164 
 127.179778 35.716000 256.569513 
 127.179778 35.716111 256.840314 
 127.179778 35.716222 257.122213 
 127.179889 35.716222 255.085573 
 127.179889 35.716333 255.400071 
 127.179889 35.716444 255.726462 
 127.179889 35.716556 256.063673 
 127.180000 35.716556 254.158620 
 127.180000 35.716667 254.530008 
 127.180000 35.716778 254.912323 
 127.180111 35.716778 253.124494 
 127.180111 35.716889 253.541276 
 127.180111 35.717000 253.969787 
 127.180111 35.717111 254.409250 
 127.180222 35.717111 252.762916 
 127.180222 35.717222 253.237284 
 127.180222 35.717333 253.722587 
 127.180222 35.717444 254.220451 
 127.180333 35.717444 252.723552 
 127.180333 35.717555 253.254906 
 127.180333 35.717667 253.798897 
 127.180444 35.717667 252.431854 
 127.180444 35.717778 253.009484 
 127.180444 35.717889 253.599786 
 127.180444 35.718000 254.201676 
 127.180556 35.718000 252.995368 
 127.180556 35.718111 253.631038 
 127.180556 35.718222 254.279277 
 127.180667 35.718222 253.214593 
 127.180667 35.718333 253.896811 
 127.180667 35.718444 254.591542 
 127.180667 35.718555 255.296248 
 127.180778 35.718555 254.405055 
 127.180778 35.718667 255.146387 
 127.180778 35.718778 255.898724 
 127.180889 35.718778 255.162177 
 127.180889 35.718889 255.948919 
 127.180889 35.719000 256.747788 
 127.180889 35.719111 257.555841 
 127.181000 35.719111 257.006967 
 127.181000 35.719222 257.852451 
 127.181000 35.719333 258.706765 
 127.181111 35.719444 259.218637 
 127.181111 35.719556 260.120854 
 127.181111 35.719667 261.031255 
 127.181222 35.719667 260.853734 
 127.181222 35.719778 261.802394 
 127.181222 35.719889 262.758801 
 127.181333 35.720000 263.759253 
 127.181333 35.720111 264.761652 
 127.181333 35.720222 265.774489 
 127.181444 35.720222 265.997842 
 127.181444 35.720333 267.046113 
 127.181444 35.720444 268.104448 
 127.181444 35.720556 269.170743 
 127.181556 35.720556 269.620374 
 127.181556 35.720667 270.722110 
 127.181556 35.720778 271.833183 
 127.181667 35.720778 272.485443 
 127.181667 35.720889 273.632018 
 127.181667 35.721000 274.787447 
 127.181778 35.721000 275.648730 
 127.181778 35.721111 276.839667 
 127.181778 35.721222 278.038924 
 127.181778 35.721333 279.244089 
 127.181889 35.721333 280.349334 
 127.181889 35.721444 281.589523 
 127.181889 35.721556 282.837066 
 127.182000 35.721556 284.160856 
 127.182000 35.721667 285.443101 
 127.182000 35.721778 286.732027 
 127.182000 35.721889 288.022804 
 127.182111 35.721889 289.598317 
 127.182111 35.722000 290.927326 
 127.182111 35.722111 292.257290 
 127.182222 35.722111 294.056751 
 127.182222 35.722222 295.424307 
 127.182222 35.722333 296.794213 
 127.182222 35.722444 298.163675 
 127.182333 35.722444 300.217237 
 127.182333 35.722556 301.622821 
 127.182333 35.722667 303.026918 
 127.182444 35.722667 305.304420 
 127.182444 35.722778 306.743415 
 127.182444 35.722889 308.179812 
 127.182444 35.723000 309.618089 
 127.182556 35.723000 312.145084 
 127.182556 35.723111 313.613553 
 127.182556 35.723222 315.077768 
 127.182667 35.723222 317.822139 
 127.182667 35.723333 319.317120 
 127.182667 35.723444 320.806589 
 127.182778 35.723444 323.758361 
 127.182778 35.723556 325.276325 
 127.182778 35.723667 326.787455 
 127.182778 35.723778 328.296454 
 127.182889 35.723778 331.480979 
 127.182889 35.723889 333.012455 
 127.182889 35.724000 334.535220 
 127.183000 35.724000 337.908828 
 127.183000 35.724111 339.453671 
 127.183000 35.724222 340.988363 
 127.183111 35.724333 346.098781 
 127.183111 35.724444 347.640633 
 127.183111 35.724556 349.175654 
 127.183222 35.724556 352.919544 
 127.183222 35.724667 354.463394 
 127.183222 35.724778 355.998903 
 127.183333 35.724778 359.896708 
 127.183333 35.724889 361.439740 
 127.183333 35.725000 362.967599 
 127.183333 35.725111 364.485059 
 127.183444 35.725111 368.530588 
 127.183444 35.725222 370.047645 
 127.183444 35.725333 371.552732 
 127.183556 35.725333 375.715080 
 127.183556 35.725444 377.215318 
 127.183556 35.725556 378.702005 
 127.183667 35.725556 382.954956 
 127.183667 35.725667 384.434676 
 127.183667 35.725778 385.894209 
 127.183667 35.725889 387.338157 
 127.183778 35.725889 391.673630 
 127.183778 35.726000 393.102261 
 127.183778 35.726111 394.513770 
 127.183889 35.726111 398.892907 
 127.183889 35.726222 400.284250 
 127.183889 35.726333 401.656980 
 127.184000 35.726333 406.063140 
 127.184000 35.726445 407.413131 
 127.184000 35.726556 408.738473 
 127.184000 35.726667 410.043420 
 127.184111 35.726667 414.440351 
 127.184111 35.726778 415.714493 
 127.184111 35.726889 416.966928 
 127.184222 35.726889 421.337779 
 127.184222 35.727000 422.554705 
 127.184222 35.727111 423.748717 
 127.184333 35.727111 428.064452 
 127.184333 35.727222 429.218410 
 127.184333 35.727333 430.348372 
 127.184444 35.727333 434.579864 
 127.184444 35.727445 435.667300 
 127.184444 35.727556 436.726114 
 127.184444 35.727667 437.759868 
 127.184556 35.727667 441.868088 
 127.184556 35.727778 442.852888 
 127.184556 35.727889 443.811920 
 127.184667 35.727889 447.781320 
 127.184667 35.728000 448.687829 
 127.184667 35.728111 449.568049 
 127.184778 35.728111 453.379795 
 127.184778 35.728222 454.205690 
 127.184778 35.728333 455.002191 
 127.184778 35.728445 455.772185 
 127.184889 35.728445 459.366675 
 127.184889 35.728556 460.078212 
 127.184889 35.728667 460.763224 
 127.185000 35.728667 464.149406 
 127.185000 35.728778 464.773902 
 127.185000 35.728889 465.372095 
 127.185111 35.728889 468.522604 
 127.185111 35.729000 469.058842 
 127.185111 35.729111 469.569253 
 127.185222 35.729111 472.468280 
 127.185222 35.729222 472.916604 
 127.185222 35.729333 473.338340 
 127.185222 35.729444 473.735419 
 127.185333 35.729444 476.322195 
 127.185333 35.729555 476.656986 
 127.185333 35.729667 476.968206 
 127.185444 35.729667 479.265354 
 127.185444 35.729778 479.514918 
 127.185444 35.729889 479.742276 
 127.185556 35.729889 481.730916 
 127.185556 35.730000 481.898274 
 127.185556 35.730111 482.044526 
 127.185667 35.730111 483.714460 
 127.185667 35.730222 483.802884 
 127.185667 35.730333 483.872388 
 127.185667 35.730444 483.924008 
 127.185778 35.730444 485.223995 
 127.185778 35.730555 485.221737 
 127.185778 35.730667 485.203855 
 127.185889 35.730667 486.165270 
 127.185889 35.730778 486.097021 
 127.185889 35.730889 486.015926 
 127.186000 35.730889 486.630868 
 127.186000 35.731000 486.503561 
 127.186000 35.731111 486.366375 
 127.186111 35.731111 486.631652 
 127.186111 35.731222 486.453061 
 127.186111 35.731333 486.267767 
 127.186222 35.731333 486.181057 
 127.186222 35.731444 485.959875 
 127.186222 35.731555 485.735355 
 127.186222 35.731667 485.507808 
 127.186333 35.731667 485.042523 
 127.186333 35.731778 484.787962 
 127.186333 35.731889 484.534711 
 127.186444 35.731889 483.724052 
 127.186444 35.732000 483.450243 
 127.186444 35.732111 483.181430 
 127.186556 35.732111 482.029089 
 127.186556 35.732222 481.747035 
 127.186556 35.732333 481.473772 
 127.186667 35.732333 479.988498 
 127.186667 35.732444 479.709788 
 127.186667 35.732556 479.443289 
 127.186778 35.732556 477.631547 
 127.186778 35.732667 477.368665 
 127.186778 35.732778 477.121478 
 127.186889 35.732889 474.761497 
 127.186889 35.733000 474.546042 
 127.186889 35.733111 474.352169 
 127.187000 35.733111 471.922095 
 127.187000 35.733222 471.750995 
 127.187000 35.733333 471.605114 
 127.187111 35.733333 468.892925 
 127.187111 35.733444 468.779120 
 127.187111 35.733556 468.694219 
 127.187222 35.733556 465.710516 
 127.187222 35.733667 465.666375 
 127.187222 35.733778 465.655080 
 127.187333 35.733778 462.420371 
 127.187333 35.733889 462.458422 
 127.187333 35.734000 462.533170 
 127.187444 35.734000 459.059013 
 127.187444 35.734111 459.191549 
 127.187444 35.734222 459.364504 
 127.187556 35.734222 455.673553 
 127.187556 35.734333 455.912905 
 127.187556 35.734444 456.195343 
 127.187556 35.734556 456.522594 
 127.187667 35.734556 452.656764 
 127.187667 35.734667 453.060164 
 127.187667 35.734778 453.511659 
 127.187778 35.734778 449.469276 
 127.187778 35.734889 450.004170 
 127.187778 35.735000 450.590208 
 127.187889 35.735000 446.382477 
 127.187889 35.735111 447.059920 
 127.187889 35.735222 447.788873 
 127.188000 35.735222 443.439664 
 127.188000 35.735333 444.267650 
 127.188000 35.735444 445.149118 
 127.188111 35.735444 440.668459 
 127.188111 35.735556 441.655078 
 127.188111 35.735667 442.696808 
 127.188222 35.735667 438.107951 
 127.188222 35.735778 439.260203 
 127.188222 35.735889 440.468831 
 127.188333 35.735889 435.780056 
 127.188333 35.736000 437.103925 
 127.188333 35.736111 438.487487 
 127.188333 35.736222 439.928095 
 127.188444 35.736222 435.218504 
 127.188444 35.736333 436.779229 
 127.188444 35.736444 438.397353 
 127.188556 35.736444 433.617980 
 127.188556 35.736556 435.359095 
 127.188556 35.736667 437.157561 
 127.188667 35.736667 432.327829 
 127.188667 35.736778 434.251211 
 127.188667 35.736889 436.234944 
 127.188778 35.736889 431.358088 
 127.188778 35.737000 433.460853 
 127.188778 35.737111 435.626980 
 127.188889 35.737111 430.719927 
 127.188889 35.737222 433.004615 
 127.188889 35.737333 435.352011 
 127.189000 35.737333 430.415111 
 127.189000 35.737444 432.879806 
 127.189000 35.737556 435.406142 
 127.189111 35.737556 430.453804 
 127.189111 35.737667 433.099792 
 127.189111 35.737778 435.796760 
 127.189222 35.737778 430.826515 
 127.189222 35.737889 433.645017 
 127.189222 35.738000 436.512036 
 127.189333 35.738111 434.520800 
 127.189333 35.738222 437.551674 
 127.189333 35.738333 440.637239 
 127.189444 35.738333 435.708827 
 127.189444 35.738444 438.896276 
 127.189444 35.738556 442.135647 
 127.189556 35.738556 437.202813 
 127.189556 35.738667 440.544118 
 127.189556 35.738778 443.922667 
 127.189667 35.738778 438.977419 
 127.189667 35.738889 442.457573 
 127.189667 35.739000 445.971044 
 127.189778 35.739000 441.015865 
 127.189778 35.739111 444.624356 
 127.189778 35.739222 448.261962 
 127.189889 35.739222 443.298462 
 127.189889 35.739333 447.023839 
 127.189889 35.739445 450.780363 
 127.190000 35.739445 445.797633 
 127.190000 35.739556 449.621150 
 127.190000 35.739667 453.477874 
 127.190111 35.739667 448.479691 
 127.190111 35.739778 452.394769 
 127.190111 35.739889 456.338507 
 127.190222 35.739889 451.312464 
 127.190222 35.740000 455.305594 
 127.190222 35.740111 459.322637 
 127.190333 35.740111 454.271566 
 127.190333 35.740222 458.328670 
 127.190333 35.740333 462.404769 
 127.190444 35.740333 457.315359 
 127.190444 35.740445 461.429076 
 127.190444 35.740556 465.542581 
 127.190556 35.740556 460.417230 
 127.190556 35.740667 464.565759 
 127.190556 35.740778 468.708802 
 127.190556 35.740889 472.858322 
 127.190667 35.740889 467.702215 
 127.190667 35.741000 471.859809 
 127.190667 35.741111 476.018619 
 127.190778 35.741111 470.810946 
 127.190778 35.741222 474.975168 
 127.190778 35.741333 479.121021 
 127.190889 35.741333 473.848337 
 127.190889 35.741445 477.997013 
 127.190889 35.741556 482.122090 
 127.191000 35.741556 476.787784 
 127.191000 35.741667 480.906028 
 127.191000 35.741778 484.995527 
 127.191111 35.741778 479.586878 
 127.191111 35.741889 483.660065 
 127.191111 35.742000 487.706401 
 127.191222 35.742000 482.228160 
 127.191222 35.742111 486.235086 
 127.191222 35.742222 490.217072 
 127.191333 35.742222 484.657668 
 127.191333 35.742333 488.591522 
 127.191333 35.742444 492.495447 
 127.191444 35.742444 486.861446 
 127.191444 35.742555 490.708922 
 127.191444 35.742667 494.521624 
 127.191556 35.742667 488.802956 
 127.191556 35.742778 492.551322 
 127.191556 35.742889 496.260238 
 127.191667 35.742889 490.465610 
 127.191667 35.743000 494.109031 
 127.191667 35.743111 497.696081 
 127.191778 35.743111 491.817182 
 127.191778 35.743222 495.337864 
 127.191778 35.743333 498.798329 
 127.191889 35.743333 492.846219 
 127.191889 35.743444 496.233586 
 127.191889 35.743555 499.557158 
 127.192000 35.743555 493.525444 
 127.192000 35.743667 496.769703 
 127.192000 35.743778 499.952279 
 127.192111 35.743778 493.854413 
 127.192111 35.743889 496.941295 
 127.192111 35.744000 499.968582 
 127.192222 35.744000 493.800191 
 127.192222 35.744111 496.727279 
 127.192222 35.744222 499.591503 
 127.192333 35.744222 493.368479 
 127.192333 35.744333 496.128676 
 127.192333 35.744444 498.823019 
 127.192444 35.744444 492.542882 
 127.192444 35.744556 495.134349 
 127.192444 35.744667 497.648479 
 127.192556 35.744778 493.742124 
 127.192556 35.744889 496.075772 
 127.192556 35.745000 498.337189 
 127.192667 35.745000 491.946650 
 127.192667 35.745111 494.095723 
 127.192667 35.745222 496.170561 
 127.192778 35.745222 489.760457 
 127.192778 35.745333 491.721820 
 127.192778 35.745444 493.607237 
 127.192889 35.745444 487.178712 
 127.192889 35.745556 488.953046 
 127.192889 35.745667 490.644058 
 127.193000 35.745667 484.219068 
 127.193000 35.745778 485.801676 
 127.193000 35.745889 487.300496 
 127.193111 35.745889 480.881450 
 127.193111 35.746000 482.271729 
 127.193111 35.746111 483.578038 
 127.193222 35.746111 477.187964 
 127.193222 35.746222 478.386154 
 127.193222 35.746333 479.502318 
 127.193333 35.746333 473.144503 
 127.193333 35.746444 474.149759 
 127.193333 35.746556 475.074818 
 127.193444 35.746556 468.772891 
 127.193444 35.746667 469.589049 
 127.193444 35.746778 470.324971 
 127.193556 35.746778 464.082822 
 127.193556 35.746889 464.712214 
 127.193556 35.747000 465.261577 
 127.193667 35.747000 459.102786 
 127.193667 35.747111 459.548399 
 127.193667 35.747222 459.914424 
 127.193778 35.747222 453.843054 
 127.193778 35.747333 454.108789 
 127.193778 35.747444 454.294824 
 127.193889 35.747444 448.333900 
 127.193889 35.747556 448.423123 
 127.193889 35.747667 448.434121 
 127.194000 35.747667 442.587501 
 127.194000 35.747778 442.504702 
 127.194000 35.747889 442.345334 
 127.194111 35.747889 436.634951 
 127.194111 35.748000 436.385049 
 127.194111 35.748111 436.059771 
 127.194222 35.748111 430.488900 
 127.194222 35.748222 430.077782 
 127.194222 35.748333 429.592335 
 127.194333 35.748333 424.181347 
 127.194333 35.748444 423.614196 
 127.194333 35.748556 422.974279 
 127.194444 35.748556 417.725588 
 127.194444 35.748667 417.008180 
 127.194444 35.748778 416.219703 
 127.194556 35.748778 411.151629 
 127.194556 35.748889 410.288401 
 127.194556 35.749000 409.359006 
 127.194667 35.749000 404.472819 
 127.194667 35.749111 403.471192 
 127.194667 35.749222 402.405797 
 127.194778 35.749333 396.583630 
 127.194778 35.749444 395.388540 
 127.194778 35.749556 394.128791 
 127.194889 35.749556 389.638228 
 127.194889 35.749667 388.319789 
 127.194889 35.749778 386.938849 
 127.195000 35.749778 382.660898 
 127.195000 35.749889 381.222944 
 127.195000 35.750000 379.729753 
 127.195111 35.750000 375.662721 
 127.195111 35.750111 374.113912 
 127.195111 35.750222 372.512522 
 127.195222 35.750222 368.663749 
 127.195222 35.750333 367.010367 
 127.195222 35.750444 365.307081 
 127.195333 35.750444 361.682102 
 127.195333 35.750556 359.930339 
 127.195333 35.750667 358.128223 
 127.195444 35.750667 354.723013 
 127.195444 35.750778 352.882089 
 127.195444 35.750889 350.990229 
 127.195556 35.750889 347.810645 
 127.195556 35.751000 345.883542 
 127.195556 35.751111 343.907902 
 127.195667 35.751111 340.948391 
 127.195667 35.751222 338.940927 
 127.195667 35.751333 336.887339 
 127.195778 35.751333 334.150910 
 127.195778 35.751444 332.068741 
 127.195778 35.751556 329.942863 
 127.195889 35.751556 327.422567 
 127.195889 35.751667 325.267467 
 127.195889 35.751778 323.078546 
 127.196000 35.751778 320.774700 
 127.196000 35.751889 318.555632 
 127.196000 35.752000 316.305371 
 127.196111 35.752000 314.209805 
 127.196111 35.752111 311.931965 
 127.196111 35.752222 309.625535 
 127.196222 35.752222 307.736125 
 127.196222 35.752333 305.404535 
 127.196222 35.752445 303.042846 
 127.196333 35.752445 301.350445 
 127.196333 35.752556 298.974054 
 127.196333 35.752667 296.565967 
 127.196444 35.752667 295.066303 
 127.196444 35.752778 292.645845 
 127.196444 35.752889 290.196059 
 127.196556 35.752889 288.879236 
 127.196556 35.753000 286.419304 
 127.196556 35.753111 283.932399 
 127.196667 35.753111 282.792396 
 127.196667 35.753222 280.293133 
 127.196667 35.753333 277.777860 
 127.196667 35.753445 275.239083 
 127.196778 35.753445 274.274357 
 127.196778 35.753556 271.730799 
 127.196778 35.753667 269.166067 
 127.196889 35.753667 268.359918 
 127.196889 35.753778 265.792298 
 127.196889 35.753889 263.205821 
 127.197000 35.753889 262.547726 
 127.197000 35.754000 259.960199 
 127.197000 35.754111 257.356117 
 127.197111 35.754111 256.837670 
 127.197111 35.754222 254.229822 
 127.197111 35.754333 251.616684 
 127.197222 35.754333 251.227522 
 127.197222 35.754444 248.607854 
 127.197222 35.754555 245.985205 
 127.197333 35.754555 245.716371 
 127.197333 35.754667 243.088869 
 127.197333 35.754778 240.460668 
 127.197444 35.754778 240.302215 
 127.197444 35.754889 237.670845 
 127.197444 35.755000 235.036500 
 127.197556 35.755000 234.979295 
 127.197556 35.755111 232.352513 
 127.197556 35.755222 229.720467 
 127.197667 35.755222 229.755197 
 127.197667 35.755333 227.132411 
 127.197667 35.755444 224.506575 
 127.197778 35.755444 224.624230 
 127.197778 35.755555 222.009352 
 127.197778 35.755667 219.393623 
 127.197889 35.755667 219.585722 
 127.197889 35.755778 216.978193 
 127.197889 35.755889 214.380947 
 127.198000 35.755889 214.638874 
 127.198000 35.756000 212.047109 
 127.198000 35.756111 209.467731 
 127.198111 35.756111 209.783946 
 127.198111 35.756222 207.211865 
 127.198111 35.756333 204.654238 
 127.198222 35.756333 205.020716 
 127.198222 35.756444 202.472225 
 127.198222 35.756555 199.940218 
 127.198333 35.756555 200.350422 
 127.198333 35.756667 197.829419 
 127.198333 35.756778 195.322591 
 127.198444 35.756778 195.769212 
 127.198444 35.756889 193.283857 
 127.198444 35.757000 190.810383 
 127.198556 35.757000 191.287882 
 127.198556 35.757111 188.837658 
 127.198556 35.757222 186.401326 
 127.198667 35.757333 184.491837 
 127.198667 35.757444 182.096374 
 127.198667 35.757556 179.721923 
 127.198778 35.757556 180.245171 
 127.198778 35.757667 177.898290 
 127.198778 35.757778 175.570178 
 127.198889 35.757778 176.107330 
 127.198889 35.757889 173.808444 
 127.198889 35.758000 171.530159 
 127.199000 35.758000 172.077469 
 127.199000 35.758111 169.830009 
 127.199000 35.758222 167.604916 
 127.199111 35.758222 168.157274 
 127.199111 35.758333 165.964528 
 127.199111 35.758444 163.795840 
 127.199222 35.758444 164.350152 
 127.199222 35.758556 162.211593 
 127.199222 35.758667 160.106004 
 127.199333 35.758667 160.657701 
 127.199333 35.758778 158.580015 
 127.199333 35.758889 156.536611 
 127.199444 35.758889 157.083070 
 127.199444 35.759000 155.068976 
 127.199444 35.759111 153.090375 
 127.199556 35.759111 153.627421 
 127.199556 35.759222 151.679399 
 127.199556 35.759333 149.764708 
 127.199667 35.759333 150.289993 
 127.199667 35.759444 148.413515 
 127.199667 35.759556 146.568216 
 127.199778 35.759556 147.077807 
 127.199778 35.759667 145.271423 
 127.199778 35.759778 143.497325 
 127.199889 35.759778 143.988955 
 127.199889 35.759889 142.254281 
 127.199889 35.760000 140.552885 
 127.200000 35.760000 141.022725 
 127.200000 35.760111 139.358227 
 127.200000 35.760222 137.733528 
 127.200111 35.760222 138.179229 
 127.200111 35.760333 136.588814 
 127.200111 35.760444 135.038682 
 127.200222 35.760556 133.940678 
 127.200222 35.760667 132.465583 
 127.200222 35.760778 131.026417 
 127.200333 35.760778 131.411968 
 127.200333 35.760889 130.012014 
 127.200333 35.761000 128.648415 
 127.200444 35.761000 128.998756 
 127.200444 35.761111 127.671438 
 127.200444 35.761222 126.385261 
 127.200556 35.761222 126.697445 
 127.200556 35.761333 125.444512 
 127.200556 35.761444 124.232621 
 127.200667 35.761444 124.502772 
 127.200667 35.761556 123.323234 
 127.200667 35.761667 122.184513 
 127.200778 35.761667 122.408804 
 127.200778 35.761778 121.301325 
 127.200778 35.761889 120.232511 
 127.200889 35.761889 120.407564 
 127.200889 35.762000 119.372275 
 127.200889 35.762111 118.373489 
 127.201000 35.762111 118.495299 
 127.201000 35.762222 117.528274 
 127.201000 35.762333 116.597407 
 127.201111 35.762333 116.662439 
 127.201111 35.762444 115.761378 
 127.201111 35.762556 114.896017 
 127.201222 35.762556 114.900509 
 127.201222 35.762667 114.061447 
 127.201222 35.762778 113.260341 
 127.201333 35.762778 113.200759 
 127.201333 35.762889 112.422395 
 127.201333 35.763000 111.681120 
 127.201444 35.763000 111.554200 
 127.201444 35.763111 110.833531 
 127.201444 35.763222 110.149006 
 127.201444 35.763333 109.498106 
 127.201556 35.763333 109.285270 
 127.201556 35.763444 108.654232 
 127.201556 35.763556 108.055960 
 127.201667 35.763556 107.768577 
 127.201667 35.763667 107.186700 
 127.201667 35.763778 106.638608 
 127.201778 35.763778 106.273880 
 127.201778 35.763889 105.738755 
 127.201778 35.764000 105.236283 
 127.201889 35.764000 104.792937 
 127.201889 35.764111 104.301100 
 127.201889 35.764222 103.840752 
 127.202000 35.764222 103.316834 
 127.202000 35.764333 102.864798 
 127.202000 35.764445 102.442372 
 127.202111 35.764445 101.838071 
 127.202111 35.764556 101.423180 
 127.202111 35.764667 101.036038 
 127.202222 35.764667 100.350593 
 127.202222 35.764778 99.968722 
 127.202222 35.764889 99.613536 
 127.202333 35.764889 98.848987 
 127.202333 35.765000 98.496992 
 127.202333 35.765111 98.170627 
 127.202444 35.765111 97.327632 
 127.202444 35.765222 97.002515 
 127.202444 35.765333 96.701990 
 127.202556 35.765445 95.483194 
 127.202556 35.765556 95.206298 
 127.202556 35.765667 94.952689 
 127.202667 35.765667 93.937195 
 127.202667 35.765778 93.680909 
 127.202667 35.765889 93.446940 
 127.202778 35.765889 92.365689 
 127.202778 35.766000 92.127865 
 127.202778 35.766111 91.911439 
 127.202889 35.766111 90.768861 
 127.202889 35.766222 90.547266 
 127.202889 35.766333 90.346930 
 127.203000 35.766333 89.152033 
 127.203000 35.766445 88.945561 
 127.203000 35.766556 88.759495 
 127.203111 35.766556 87.518729 
 127.203111 35.766667 87.326191 
 127.203111 35.766778 87.153278 
 127.203222 35.766778 85.877986 
 127.203222 35.766889 85.698592 
 127.203222 35.767000 85.537853 
 127.203333 35.767000 84.236456 
 127.203333 35.767111 84.070036 
 127.203333 35.767222 83.921353 
 127.203444 35.767222 82.607398 
 127.203444 35.767333 82.453546 
 127.203444 35.767444 82.316908 
 127.203444 35.767555 82.197680 
 127.203556 35.767555 80.859697 
 127.203556 35.767667 80.735395 
 127.203556 35.767778 80.628021 
 127.203667 35.767778 79.304705 
 127.203667 35.767889 79.193386 
 127.203667 35.768000 79.098424 
 127.203778 35.768000 77.801914 
 127.203778 35.768111 77.704664 
 127.203778 35.768222 77.623249 
 127.203889 35.768222 76.370499 
 127.203889 35.768333 76.288306 
 127.203889 35.768444 76.221687 
 127.204000 35.768444 75.026162 
 127.204000 35.768555 74.960419 
 127.204000 35.768667 74.910034 
 127.204111 35.768667 73.789418 
 127.204111 35.768778 73.741653 
 127.204111 35.768889 73.709205 
 127.204222 35.768889 72.677813 
 127.204222 35.769000 72.649840 
 127.204222 35.769111 72.636966 
 127.204333 35.769111 71.712563 
 127.204333 35.769222 71.706200 
 127.204333 35.769333 71.714728 
 127.204333 35.769444 71.737972 
 127.204444 35.769444 70.929038 
 127.204444 35.769555 70.960805 
 127.204444 35.769667 71.007159 
 127.204556 35.769667 70.339106 
 127.204556 35.769778 70.396034 
 127.204556 35.769889 70.467192 
 127.204667 35.769889 69.954347 
 127.204667 35.770000 70.038087 
 127.204667 35.770111 70.135808 
 127.204778 35.770111 69.793713 
 127.204778 35.770222 69.905840 
 127.204778 35.770333 70.031660 
 127.204889 35.770333 69.873736 
 127.204889 35.770444 70.015622 
 127.204889 35.770556 70.171145 
 127.205000 35.770556 70.210624 
 127.205000 35.770667 70.383099 
 127.205000 35.770778 70.569153 
 127.205111 35.770778 70.817960 
 127.205111 35.770889 71.022067 
 127.205111 35.771000 71.239397 
 127.205111 35.771111 71.468951 
 127.205222 35.771111 71.943906 
 127.205222 35.771222 72.192887 
 127.205222 35.771333 72.453999 
 127.205333 35.771333 73.159424 
 127.205333 35.771444 73.439565 
 127.205333 35.771556 73.731724 
 127.205444 35.771556 74.673840 
 127.205444 35.771667 74.985089 
 127.205444 35.771778 75.307733 
 127.205556 35.771778 76.493674 
 127.205556 35.771889 76.835104 
 127.205556 35.772000 77.187212 
 127.205667 35.772000 78.618990 
 127.205667 35.772111 78.989171 
 127.205667 35.772222 79.369212 
 127.205778 35.772222 81.051092 
 127.205778 35.772333 81.448791 
 127.205778 35.772444 81.854051 
 127.205889 35.772444 83.783501 
 127.205889 35.772556 84.205619 
 127.205889 35.772667 84.634197 
 127.205889 35.772778 85.070358 
 127.206000 35.772778 87.255987 
 127.206000 35.772889 87.704839 
 127.206000 35.773000 88.160144 
 127.206111 35.773000 90.588163 
 127.206111 35.773111 91.054547 
 127.206111 35.773222 91.524552 
 127.206222 35.773222 94.186723 
 127.206222 35.773333 94.665826 
 127.206222 35.773444 95.147203 
 127.206333 35.773444 98.039736 
 127.206333 35.773556 98.527081 
 127.206333 35.773667 99.015291 
 127.206444 35.773667 102.123852 
 127.206444 35.773778 102.614542 
 127.206444 35.773889 103.105487 
 127.206556 35.773889 106.423375 
 127.206556 35.774000 106.911307 
 127.206556 35.774111 107.398837 
 127.206667 35.774222 111.388075 
 127.206667 35.774333 111.866587 
 127.206667 35.774444 112.341167 
 127.206778 35.774444 116.024138 
 127.206778 35.774556 116.487777 
 127.206778 35.774667 116.945994 
 127.206889 35.774667 120.785681 
 127.206889 35.774778 121.228429 
 127.206889 35.774889 121.665031 
 127.207000 35.774889 125.649873 
 127.207000 35.775000 126.064871 
 127.207000 35.775111 126.472963 
 127.207111 35.775111 130.578154 
 127.207111 35.775222 130.960030 
 127.207111 35.775333 131.333513 
 127.207222 35.775333 135.546048 
 127.207222 35.775444 135.888685 
 127.207222 35.775556 136.221502 
 127.207333 35.775556 140.514696 
 127.207333 35.775667 140.812641 
 127.207333 35.775778 141.098411 
 127.207333 35.775889 141.372825 
 127.207444 35.775889 145.705324 
 127.207444 35.776000 145.938952 
 127.207444 35.776111 146.160016 
 127.207556 35.776111 150.528559 
 127.207556 35.776222 150.704719 
 127.207556 35.776333 150.867231 
 127.207667 35.776333 155.257944 
 127.207667 35.776444 155.371648 
 127.207667 35.776556 155.470761 
 127.207778 35.776556 159.856257 
 127.207778 35.776667 159.903101 
 127.207778 35.776778 159.934435 
 127.207889 35.776778 164.301481 
 127.207889 35.776889 164.277277 
 127.207889 35.777000 164.237200 
 127.208000 35.777000 168.559457 
 127.208000 35.777111 168.460865 
 127.208000 35.777222 168.346239 
 127.208000 35.777333 168.215384 
 127.208111 35.777333 172.436033 
 127.208111 35.777445 172.243980 
 127.208111 35.777556 172.036242 
 127.208222 35.777556 176.173847 
 127.208222 35.777667 175.902836 
 127.208222 35.777778 175.616484 
 127.208333 35.777778 179.661200 
 127.208333 35.777889 179.310182 
 127.208333 35.778000 178.944396 
 127.208444 35.778000 182.874840 
 127.208444 35.778111 182.443642 
 127.208444 35.778222 181.997704 
 127.208556 35.778222 185.806292 
 127.208556 35.778333 185.296357 
 127.208556 35.778445 184.771722 
 127.208667 35.778556 187.852506 
 127.208667 35.778667 187.250907 
 127.208667 35.778778 186.638317 
 127.208778 35.778778 190.111237 
 127.208778 35.778889 189.435170 
 127.208778 35.779000 188.749673 
 127.208889 35.779000 192.063735 
 127.208889 35.779111 191.316611 
 127.208889 35.779222 190.560531 
 127.209000 35.779222 193.713900 
 127.209000 35.779333 192.901262 
 127.209000 35.779444 192.080150 
 127.209111 35.779444 195.062689 
 127.209111 35.779555 194.188269 
 127.209111 35.779667 193.307344 
 127.209222 35.779667 196.120080 
 127.209222 35.779778 195.189559 
 127.209222 35.779889 194.254701 
 127.209222 35.780000 193.318048 
 127.209333 35.780000 195.909322 
 127.209333 35.780111 194.928857 
 127.209333 35.780222 193.947389 
 127.209444 35.780222 196.368147 
 127.209444 35.780333 195.347656 
 127.209444 35.780444 194.328717 
 127.209556 35.780444 196.576381 
 127.209556 35.780555 195.523674 
 127.209556 35.780667 194.475217 
 127.209667 35.780667 196.555852 
 127.209667 35.780778 195.477319 
 127.209667 35.780889 194.409544 
 127.209778 35.780889 196.323629 
 127.209778 35.781000 195.229794 
 127.209778 35.781111 194.149674 
 127.209889 35.781111 195.905025 
 127.209889 35.781222 194.804872 
 127.209889 35.781333 193.721436 
 127.209889 35.781444 192.652072 
 127.210000 35.781444 194.223833 
 127.210000 35.781555 193.146366 
 127.210000 35.781667 192.086003 
 127.210111 35.781667 193.514343 
 127.210111 35.781778 192.450395 
 127.210111 35.781889 191.410217 
 127.210222 35.781889 192.700049 
 127.210222 35.782000 191.660898 
 127.210222 35.782111 190.648464 
 127.210333 35.782111 191.809361 
 127.210333 35.782222 190.804347 
 127.210333 35.782333 189.828929 
 127.210444 35.782333 190.866845 
 127.210444 35.782444 189.905179 
 127.210444 35.782556 188.974321 
 127.210556 35.782556 189.898705 
 127.210556 35.782667 188.990917 
 127.210556 35.782778 188.115114 
 127.210556 35.782889 187.275228 
 127.210667 35.782889 188.085296 
 127.210667 35.783000 187.273053 
 127.210667 35.783111 186.499205 
 127.210778 35.783111 187.213767 
 127.210778 35.783222 186.473142 
 127.210778 35.783333 185.773231 
 127.210889 35.783333 186.398038 
 127.210889 35.783444 185.736595 
 127.210889 35.783556 185.116973 
 127.211000 35.783556 185.659311 
 127.211000 35.783667 185.085064 
 127.211000 35.783778 184.553710 
 127.211111 35.783778 185.018336 
 127.211111 35.783889 184.536464 
 127.211111 35.784000 184.099540 
 127.211111 35.784111 183.709656 
 127.211222 35.784111 184.108180 
 127.211222 35.784222 183.771171 
 127.211222 35.784333 183.482185 
 127.211333 35.784333 183.813525 
 127.211333 35.784444 183.581620 
 127.211333 35.784556 183.398693 
 127.211444 35.784556 183.666026 
 127.211444 35.784667 183.542609 
 127.211444 35.784778 183.469527 
 127.211556 35.784778 183.674219 
 127.211556 35.784889 183.662520 
 127.211556 35.785000 183.702289 
 127.211667 35.785000 183.844886 
 127.211667 35.785111 183.947572 
 127.211667 35.785222 184.102194 
 127.211667 35.785333 184.309449 
 127.211778 35.785333 184.401245 
 127.211778 35.785444 184.672209 
 127.211778 35.785556 184.996416 
 127.211889 35.785556 185.024380 
 127.211889 35.785667 185.412381 
 127.211889 35.785778 185.854014 
 127.212000 35.785778 185.815463 
 127.212000 35.785889 186.320483 
 127.212000 35.786000 186.879314 
 127.212111 35.786000 186.770661 
 127.212111 35.786111 187.393084 
 127.212111 35.786222 188.067063 
 127.212222 35.786222 187.883642 
 127.212222 35.786333 188.621182 
 127.212222 35.786444 189.409666 
 127.212222 35.786556 190.251570 
 127.212333 35.786556 189.997181 
 127.212333 35.786667 190.898003 
 127.212333 35.786778 191.851784 
 127.212444 35.786778 191.510072 
 127.212444 35.786889 192.522327 
 127.212444 35.787000 193.583354 
 127.212556 35.787000 193.148255 
 127.212556 35.787111 194.267172 
 127.212556 35.787222 195.433728 
 127.212667 35.787222 194.897590 
 127.212667 35.787333 196.119592 
 127.212667 35.787444 197.387987 
 127.212778 35.787444 196.744455 
 127.212778 35.787556 198.065624 
 127.212778 35.787667 199.431842 
 127.212778 35.787778 200.847278 
 127.212889 35.787778 200.088776 
 127.212889 35.787889 201.551111 
 127.212889 35.788000 203.056424 
 127.213000 35.788000 202.174393 
 127.213000 35.788111 203.726012 
 127.213000 35.788222 205.319100 
 127.213111 35.788222 204.305156 
 127.213111 35.788333 205.941513 
 127.213111 35.788444 207.617796 
 127.213222 35.788444 206.466933 
 127.213222 35.788556 208.183455 
 127.213222 35.788667 209.941398 
 127.213333 35.788778 210.434832 
 127.213333 35.788889 212.266959 
 127.213333 35.789000 214.135132 
 127.213444 35.789000 212.683307 
 127.213444 35.789111 214.585188 
 127.213444 35.789222 216.521557 
 127.213556 35.789222 214.913313 
 127.213556 35.789333 216.880673 
 127.213556 35.789445 218.884470 
 127.213667 35.789445 217.118811 
 127.213667 35.789556 219.144156 
 127.213667 35.789667 221.208014 
 127.213778 35.789667 219.279729 
 127.213778 35.789778 221.362623 
 127.213778 35.789889 223.482798 
 127.213778 35.790000 225.632232 
 127.213889 35.790000 223.530561 
 127.213889 35.790111 225.703636 
 127.213889 35.790222 227.904602 
 127.214000 35.790222 225.637994 
 127.214000 35.790333 227.860867 
 127.214000 35.790445 230.114228 
 127.214111 35.790445 227.687565 
 127.214111 35.790556 229.953634 
 127.214111 35.790667 232.252911 
 127.214222 35.790667 229.665059 
 127.214222 35.790778 231.975734 
 127.214222 35.790889 234.318607 
 127.214333 35.790889 231.577573 
 127.214333 35.791000 233.930857 
 127.214333 35.791111 236.315387 
 127.214333 35.791222 238.726388 
 127.214444 35.791222 235.820500 
 127.214444 35.791333 238.240938 
 127.214444 35.791445 240.691024 
 127.214556 35.791445 237.644594 
 127.214556 35.791556 240.103762 
 127.214556 35.791667 242.591732 
 127.214667 35.791667 239.407958 
 127.214667 35.791778 241.904894 
 127.214667 35.791889 244.429830 
 127.214778 35.791889 241.122829 
 127.214778 35.792000 243.661243 
 127.214778 35.792111 246.218125 
 127.214778 35.792222 248.801504 
 127.214889 35.792222 245.368049 
 127.214889 35.792333 247.960765 
 127.214889 35.792444 250.579219 
 127.215000 35.792444 247.045514 
 127.215000 35.792555 249.673822 
 127.215000 35.792667 252.327116 
 127.215111 35.792667 248.699829 
 127.215111 35.792778 251.363599 
 127.215111 35.792889 254.051596 
 127.215222 35.792889 250.349352 
 127.215222 35.793000 253.053191 
 127.215222 35.793111 255.771151 
 127.215333 35.793111 252.001705 
 127.215333 35.793222 254.740959 
 127.215333 35.793333 257.493394 
 127.215333 35.793444 260.267619 
 127.215444 35.793444 256.451244 
 127.215444 35.793555 259.237998 
 127.215444 35.793667 262.045640 
 127.215556 35.793667 258.192060 
 127.215556 35.793778 261.017714 
 127.215556 35.793889 263.853547 
 127.215667 35.793889 259.983320 
 127.215667 35.794000 262.842583 
 127.215667 35.794111 265.710848 
 127.215778 35.794111 261.832455 
 127.215778 35.794222 264.724599 
 127.215778 35.794333 267.624472 
 127.215778 35.794444 270.541047 
 127.215889 35.794444 266.682391 
 127.215889 35.794555 269.612715 
 127.215889 35.794667 272.558420 
 127.216000 35.794667 268.721514 
 127.216000 35.794778 271.685876 
 127.216000 35.794889 274.653964 
 127.216111 35.794889 270.858436 
 127.216111 35.795000 273.849828 
 127.216111 35.795111 276.843266 
 127.216222 35.795111 273.096252 
 127.216222 35.795222 276.112279 
 127.216222 35.795333 279.128528 
 127.216333 35.795333 275.448332 
 127.216333 35.795444 278.486083 
 127.216333 35.795556 281.527314 
 127.216333 35.795667 284.565561 
 127.216444 35.795667 280.970691 
 127.216444 35.795778 284.028140 
 127.216444 35.795889 287.080446 
 127.216556 35.795889 283.575068 
 127.216556 35.796000 286.644599 
 127.216556 35.796111 289.706681 
 127.216667 35.796111 286.295009 
 127.216667 35.796222 289.371952 
 127.216667 35.796333 292.444270 
 127.216778 35.796333 289.140399 
 127.216778 35.796444 292.214215 
 127.216778 35.796556 295.286106 
 127.216778 35.796667 298.344114 
 127.216889 35.796667 295.162769 
 127.216889 35.796778 298.228315 
 127.216889 35.796889 301.277223 
 127.217000 35.796889 298.214701 
 127.217000 35.797000 301.267452 
 127.217000 35.797111 304.300688 
 127.217111 35.797111 301.364640 
 127.217111 35.797222 304.397640 
 127.217111 35.797333 307.413307 
 127.217222 35.797333 304.603492 
 127.217222 35.797444 307.604158 
 127.217222 35.797556 310.589539 
 127.217222 35.797667 313.547875 
 127.217333 35.797667 310.879404 
 127.217333 35.797778 313.826573 
 127.217333 35.797889 316.743536 
 127.217444 35.797889 314.205421 
 127.217444 35.798000 317.106111 
 127.217444 35.798111 319.978290 
 127.217556 35.798111 317.575749 
 127.217556 35.798222 320.416473 
 127.217556 35.798333 323.230251 
 127.217667 35.798333 320.959886 
 127.217667 35.798444 323.736870 
 127.217667 35.798556 326.483423 
 127.217778 35.798667 327.052680 
 127.217778 35.798778 329.723040 
 127.217778 35.798889 332.353305 
 127.217889 35.798889 330.345910 
 127.217889 35.799000 332.926560 
 127.217889 35.799111 335.468257 
 127.218000 35.799111 333.590755 
 127.218000 35.799222 336.077305 
 127.218000 35.799333 338.521456 
 127.218111 35.799333 336.768596 
 127.218111 35.799444 339.152108 
 127.218111 35.799556 341.489832 
 127.218222 35.799556 339.861645 
 127.218222 35.799667 342.133353 
 127.218222 35.799778 344.355968 
 127.218222 35.799889 346.524254 
 127.218333 35.799889 345.001878 
 127.218333 35.800000 347.097288 
 127.218333 35.800111 349.139091 
 127.218444 35.800111 347.732599 
 127.218444 35.800222 349.696602 
 127.218444 35.800333 351.603992 
 127.218556 35.800333 350.307870 
 127.218556 35.800444 352.132782 
 127.218556 35.800556 353.898233 
 127.218667 35.800556 352.711187 
 127.218667 35.800667 354.392661 
 127.218667 35.800778 356.006342 
 127.218667 35.800889 357.556842 
 127.218778 35.800889 356.451511 
 127.218778 35.801000 357.910052 
 127.218778 35.801111 359.303035 
 127.218889 35.801111 358.298480 
 127.218889 35.801222 359.596080 
 127.218889 35.801333 360.825970 
 127.219000 35.801333 359.917865 
 127.219000 35.801444 361.049357 
 127.219000 35.801556 362.111229 
 127.219111 35.801556 361.298521 
 127.219111 35.801667 362.261087 
 127.219111 35.801778 363.149194 
 127.219111 35.801889 363.965409 
 127.219222 35.801889 363.216499 
 127.219222 35.802000 363.929309 
 127.219222 35.802111 364.568949 
 127.219333 35.802111 363.910511 
 127.219333 35.802222 364.445444 
 127.219333 35.802333 364.906212 
 127.219444 35.802333 364.336018 
 127.219444 35.802445 364.691816 
 127.219444 35.802556 364.971649 
 127.219556 35.802556 364.489790 
 127.219556 35.802667 364.664670 
 127.219556 35.802778 364.763793 
 127.219556 35.802889 364.787519 
 127.219667 35.802889 364.362930 
 127.219667 35.803000 364.281508 
 127.219667 35.803111 364.124688 
 127.219778 35.803111 363.788101 
 127.219778 35.803222 363.526667 
 127.219778 35.803333 363.191159 
 127.219889 35.803333 362.942616 
 127.219889 35.803445 362.503205 
 127.219889 35.803556 361.990922 
 127.220000 35.803556 361.831704 
 127.220000 35.803667 361.217002 
 127.220000 35.803778 360.530906 
 127.220000 35.803889 359.771584 
 127.220111 35.803889 359.675373 
 127.220111 35.804000 358.819160 
 127.220111 35.804111 357.890992 
 127.220222 35.804111 357.887755 
 127.220222 35.804222 356.864085 
 127.220222 35.804333 355.773636 
 127.220333 35.804333 355.865157 
 127.220333 35.804444 354.680712 
 127.220333 35.804556 353.431837 
 127.220444 35.804556 353.619869 
 127.220444 35.804667 352.280496 
 127.220444 35.804778 350.879266 
 127.220444 35.804889 349.412335 
 127.220556 35.804889 349.678174 
 127.220556 35.805000 348.128504 
 127.220556 35.805111 346.520930 
 127.220667 35.805111 346.888873 
 127.220667 35.805222 345.200445 
 127.220667 35.805333 343.457162 
 127.220778 35.805333 343.929745 
 127.220778 35.805444 342.110235 
 127.220778 35.805555 340.239082 
 127.220889 35.805555 340.817357 
 127.220889 35.805667 338.874892 
 127.220889 35.805778 336.884144 
 127.220889 35.805889 334.839586 
 127.221000 35.805889 335.513642 
 127.221000 35.806000 333.408240 
 127.221000 35.806111 331.259506 
 127.221111 35.806111 332.044095 
 127.221111 35.806222 329.836432 
 127.221111 35.806333 327.589073 
 127.221222 35.806333 328.486383 
 127.221222 35.806444 326.185596 
 127.221222 35.806555 323.848827 
 127.221333 35.806555 324.858003 
 127.221333 35.806667 322.473409 
 127.221333 35.806778 320.052413 
 127.221333 35.806889 317.600810 
 127.221444 35.806889 318.720347 
 127.221444 35.807000 316.228652 
 127.221444 35.807111 313.710180 
 127.221556 35.807111 314.943203 
 127.221556 35.807222 312.390322 
 127.221556 35.807333 309.814504 
 127.221667 35.807333 311.161990 
 127.221667 35.807444 308.557414 
 127.221667 35.807556 305.929197 
 127.221778 35.807556 307.387541 
 127.221778 35.807667 304.745219 
 127.221778 35.807778 302.078470 
 127.221778 35.807889 299.398077 
 127.221889 35.807889 300.972670 
 127.221889 35.808000 298.276667 
 127.221889 35.808111 295.570776 
 127.222000 35.808111 297.253098 
 127.222000 35.808222 294.536935 
 127.222000 35.808333 291.814571 
 127.222111 35.808333 293.603992 
 127.222111 35.808444 290.876552 
 127.222111 35.808556 288.141816 
 127.222222 35.808556 290.031745 
 127.222222 35.808667 287.306331 
 127.222222 35.808778 284.572453 
 127.222222 35.808889 281.841076 
 127.222333 35.808889 283.841776 
 127.222333 35.809000 281.117008 
 127.222333 35.809111 278.398115 
 127.222444 35.809111 280.492882 
 127.222444 35.809222 277.785140 
 127.222444 35.809333 275.081882 
 127.222556 35.809333 277.263619 
 127.222556 35.809444 274.585070 
 127.222556 35.809556 271.909558 
 127.222667 35.809556 274.175876 
 127.222667 35.809667 271.529053 
 127.222667 35.809778 268.888357 
 127.222667 35.809889 266.264273 
 127.222778 35.809889 268.621251 
 127.222778 35.810000 266.022020 
 127.222778 35.810111 263.437744 
 127.222889 35.810111 265.867540 
 127.222889 35.810222 263.320433 
 127.222889 35.810333 260.786585 
 127.223000 35.810333 263.278562 
 127.223000 35.810444 260.784907 
 127.223000 35.810556 258.307142 
 127.223111 35.810556 260.858219 
 127.223111 35.810667 258.423418 
 127.223111 35.810778 256.006988 
 127.223111 35.810889 253.618406 
 127.223222 35.810889 256.235052 
 127.223222 35.811000 253.884740 
 127.223222 35.811111 251.560339 
 127.223333 35.811111 254.222080 
 127.223333 35.811222 251.946198 
 127.223333 35.811333 249.694265 
 127.223444 35.811333 252.389620 
 127.223444 35.811444 250.188002 
 127.223444 35.811556 248.012263 
 127.223556 35.811556 250.738226 
 127.223556 35.811667 248.614354 
 127.223556 35.811778 246.518119 
 127.223667 35.811889 247.216699 
 127.223667 35.812000 245.206300 
 127.223667 35.812111 243.225993 
 127.223778 35.812111 246.004945 
 127.223778 35.812222 244.079181 
 127.223778 35.812333 242.184850 
 127.223889 35.812333 244.968956 
 127.223889 35.812444 243.129797 
 127.223889 35.812556 241.323234 
 127.224000 35.812556 244.110267 
 127.224000 35.812667 242.359284 
 127.224000 35.812778 240.641882 
 127.224111 35.812889 241.756660 
 127.224111 35.813000 240.132193 
 127.224111 35.813111 238.542672 
 127.224222 35.813111 241.327781 
 127.224222 35.813222 239.793822 
 127.224222 35.813333 238.295366 
 127.224333 35.813333 241.060530 
 127.224333 35.813444 239.617202 
 127.224333 35.813556 238.209760 
 127.224444 35.813556 240.953972 
 127.224444 35.813667 239.598728 
 127.224444 35.813778 238.284168 
 127.224556 35.813778 240.998165 
 127.224556 35.813889 239.732788 
 127.224556 35.814000 238.507819 
 127.224556 35.814111 237.319219 
 127.224667 35.814111 240.014735 
 127.224667 35.814222 238.878160 
 127.224667 35.814333 237.777746 
 127.224778 35.814333 240.433554 
 127.224778 35.814445 239.382004 
 127.224778 35.814556 238.369794 
 127.224889 35.814556 240.986230 
 127.224889 35.814667 240.019688 
 127.224889 35.814778 239.091660 
 127.225000 35.814778 241.661187 
 127.225000 35.814889 240.777340 
 127.225000 35.815000 239.931033 
 127.225000 35.815111 239.119230 
 127.225111 35.815111 241.650840 
 127.225111 35.815222 240.883467 
 127.225111 35.815333 240.149689 
 127.225222 35.815333 242.627793 
 127.225222 35.815445 241.935070 
 127.225222 35.815556 241.277208 
 127.225333 35.815556 243.703360 
 127.225333 35.815667 243.083145 
 127.225333 35.815778 242.496349 
 127.225444 35.815778 244.864775 
 127.225444 35.815889 244.313332 
 127.225444 35.816000 243.793743 
 127.225444 35.816111 243.303845 
 127.225556 35.816111 245.619855 
 127.225556 35.816222 245.162588 
 127.225556 35.816333 244.735023 
 127.225667 35.816333 246.989400 
 127.225667 35.816445 246.590931 
 127.225667 35.816556 246.220339 
 127.225778 35.816556 248.415642 
 127.225778 35.816667 248.071346 
 127.225778 35.816778 247.753011 
 127.225889 35.816778 249.885143 
 127.225889 35.816889 249.590184 
 127.225889 35.817000 249.319185 
 127.225889 35.817111 249.070647 
 127.226000 35.817111 251.140498 
 127.226000 35.817222 250.911361 
 127.226000 35.817333 250.703476 
 127.226111 35.817333 252.708722 
 127.226111 35.817444 252.516633 
 127.226111 35.817555 252.343639 
 127.226222 35.817555 254.287698 
 127.226222 35.817667 254.127268 
 127.226222 35.817778 253.983730 
 127.226333 35.817778 255.864140 
 127.226333 35.817889 255.729890 
 127.226333 35.818000 255.610100 
 127.226444 35.818000 257.430699 
 127.226444 35.818111 257.317280 
 127.226444 35.818222 257.215886 
 127.226444 35.818333 257.126169 
 127.226556 35.818333 258.876650 
 127.226556 35.818444 258.788057 
 127.226556 35.818555 258.708866 
 127.226667 35.818555 260.401127 
 127.226667 35.818667 260.319739 
 127.226667 35.818778 260.245362 
 127.226778 35.818778 261.878647 
 127.226778 35.818889 261.799073 
 127.226778 35.819000 261.724115 
 127.226889 35.819000 263.303274 
 127.226889 35.819111 263.219908 
 127.226889 35.819222 263.138923 
 127.226889 35.819333 263.059896 
 127.227000 35.819333 264.571629 
 127.227000 35.819444 264.479322 
 127.227000 35.819555 264.386813 
 127.227111 35.819555 265.849151 
 127.227111 35.819667 265.740367 
 127.227111 35.819778 265.629088 
 127.227222 35.819778 267.043193 
 127.227222 35.819889 266.913221 
 127.227222 35.820000 266.778466 
 127.227333 35.820000 268.150472 
 127.227333 35.820111 267.994414 
 127.227333 35.820222 267.831536 
 127.227444 35.820222 269.163595 
 127.227444 35.820333 268.977027 
 127.227444 35.820444 268.781680 
 127.227444 35.820556 268.577272 
 127.227556 35.820556 269.858994 
 127.227556 35.820667 269.627502 
 127.227556 35.820778 269.384783 
 127.227667 35.820778 270.636279 
 127.227667 35.820889 270.364617 
 127.227667 35.821000 270.079992 
 127.227778 35.821000 271.308954 
 127.227778 35.821111 270.993756 
 127.227778 35.821222 270.663973 
 127.227889 35.821222 271.875589 
 127.227889 35.821333 271.513249 
 127.227889 35.821444 271.136092 
 127.227889 35.821556 270.742397 
 127.228000 35.821556 271.924514 
 127.228000 35.821667 271.497006 
 127.228000 35.821778 271.051631 
 127.228111 35.821778 272.231287 
 127.228111 35.821889 271.751398 
 127.228111 35.822000 271.252450 
 127.228222 35.822000 272.435331 
 127.228222 35.822111 271.901491 
 127.228222 35.822222 271.347542 
 127.228333 35.822222 272.543415 
 127.228333 35.822333 271.953434 
 127.228333 35.822444 271.344503 
 127.228444 35.822444 272.559729 
 127.228444 35.822556 271.913852 
 127.228444 35.822667 271.248462 
 127.228444 35.822778 270.561118 
 127.228556 35.822778 271.791433 
 127.228556 35.822889 271.069458 
 127.228556 35.823000 270.324977 
 127.228667 35.823000 271.593054 
 127.228667 35.823111 270.813467 
 127.228667 35.823222 270.013686 
 127.228778 35.823222 271.330612 
 127.228778 35.823333 270.495404 
 127.228778 35.823444 269.639937 
 127.228889 35.823444 271.012858 
 127.228889 35.823556 270.123186 
 127.228889 35.823667 269.213330 
 127.228889 35.823778 268.280248 
 127.229000 35.823778 269.711054 
 127.229000 35.823889 268.748469 
 127.229000 35.824000 267.762737 
 127.229111 35.824000 269.269550 
 127.229111 35.824111 268.254499 
 127.229111 35.824222 267.220042 
 127.229222 35.824222 268.814440 
 127.229222 35.824333 267.750944 
 127.229222 35.824444 266.668549 
 127.229333 35.824444 268.357038 
 127.229333 35.824556 267.247744 
 127.229333 35.824667 266.120168 
 127.229444 35.824667 267.914117 
 127.229444 35.824778 266.761923 
 127.229444 35.824889 265.590131 
 127.229444 35.825000 264.401155 
 127.229556 35.825000 266.305116 
 127.229556 35.825111 265.094283 
 127.229556 35.825222 263.867110 
 127.229667 35.825222 265.894679 
 127.229667 35.825333 264.648186 
 127.229667 35.825444 263.386273 
 127.229778 35.825444 265.541527 
 127.229778 35.825556 264.262880 
 127.229778 35.825667 262.967556 
 127.229889 35.825667 265.260456 
 127.229889 35.825778 263.955478 
 127.229889 35.825889 262.632578 
 127.230000 35.826000 263.735441 
 127.230000 35.826111 262.388630 
 127.230000 35.826222 261.030046 
 127.230111 35.826222 263.618792 
 127.230111 35.826333 262.251726 
 127.230111 35.826444 260.874009 
 127.230222 35.826444 263.612665 
 127.230222 35.826556 262.228922 
 127.230222 35.826667 260.833255 
 127.230333 35.826667 263.728940 
 127.230333 35.826778 262.334397 
 127.230333 35.826889 260.926654 
 127.230444 35.826889 263.976497 
 127.230444 35.827000 262.572100 
 127.230444 35.827111 261.155596 
 127.230444 35.827222 259.732463 
 127.230556 35.827222 262.953767 
 127.230556 35.827333 261.531637 
 127.230556 35.827445 260.101522 
 127.230667 35.827445 263.477211 
 127.230667 35.827556 262.054775 
 127.230667 35.827667 260.622987 
 127.230778 35.827667 264.156088 
 127.230778 35.827778 262.733538 
 127.230778 35.827889 261.302670 
 127.230889 35.827889 264.984063 
 127.230889 35.828000 263.563710 
 127.230889 35.828111 262.136029 
 127.231000 35.828111 265.966544 
 127.231000 35.828222 264.547955 
 127.231000 35.828333 263.127859 
 127.231000 35.828445 261.701989 
 127.231111 35.828445 265.682455 
 127.231111 35.828556 264.269080 
 127.231111 35.828667 262.850808 
 127.231222 35.828667 266.966193 
 127.231222 35.828778 265.560780 
 127.231222 35.828889 264.151277 
 127.231333 35.828889 268.385868 
 127.231333 35.829000 266.989259 
 127.231333 35.829111 265.589300 
 127.231444 35.829111 269.939141 
 127.231444 35.829222 268.549430 
 127.231444 35.829333 267.161809 
 127.231556 35.829333 271.608217 
 127.231556 35.829444 270.227891 
 127.231556 35.829556 268.850210 
 127.231556 35.829667 267.470997 
 127.231667 35.829667 272.015838 
 127.231667 35.829778 270.647736 
 127.231667 35.829889 269.278598 
 127.231778 35.829889 273.890896 
 127.231778 35.830000 272.529295 
 127.231778 35.830111 271.171751 
 127.231889 35.830111 275.843214 
 127.231889 35.830222 274.489381 
 127.231889 35.830333 273.139918 
 127.232000 35.830333 277.846751 
 127.232000 35.830444 276.499255 
 127.232000 35.830555 275.156372 
 127.232111 35.830667 278.545714 
 127.232111 35.830778 277.207609 
 127.232111 35.830889 275.870175 
 127.232222 35.830889 280.599443 
 127.232222 35.831000 279.261737 
 127.232222 35.831111 277.929409 
 127.232333 35.831111 282.644796 
 127.232333 35.831222 281.307451 
 127.232333 35.831333 279.975537 
 127.232444 35.831333 284.650373 
 127.232444 35.831444 283.310844 
 127.232444 35.831555 281.976758 
 127.232556 35.831555 286.598757 
 127.232556 35.831667 285.254314 
 127.232556 35.831778 283.912984 
 127.232556 35.831889 282.577493 
 127.232667 35.831889 287.105217 
 127.232667 35.832000 285.756054 
 127.232667 35.832111 284.412666 
 127.232778 35.832111 288.845011 
 127.232778 35.832222 287.485023 
 127.232778 35.832333 286.130728 
 127.232889 35.832333 290.441060 
 127.232889 35.832444 289.067240 
 127.232889 35.832556 287.696669 
 127.233000 35.832556 291.872304 
 127.233000 35.832667 290.484005 
 127.233000 35.832778 289.096444 
 127.233111 35.832778 293.111937 
 127.233111 35.832889 291.703842 
 127.233111 35.833000 290.296336 
 127.233111 35.833111 288.894646 
 127.233222 35.833111 292.708837 
 127.233222 35.833222 291.278487 
 127.233222 35.833333 289.853888 
 127.233333 35.833333 293.472521 
 127.233333 35.833444 292.016588 
 127.233333 35.833556 290.563875 
 127.233444 35.833556 293.967675 
 127.233444 35.833667 292.486177 
 127.233444 35.833778 291.005296 
 127.233556 35.833778 294.184099 
 127.233556 35.833889 292.672167 
 127.233556 35.834000 291.160788 
 127.233667 35.834000 294.095230 
 127.233667 35.834111 292.550808 
 127.233667 35.834222 291.006920 
 127.233667 35.834333 289.466623 
 127.233778 35.834333 292.107036 
 127.233778 35.834444 290.531573 
 127.233778 35.834556 288.957081 
 127.233889 35.834556 291.327066 
 127.233889 35.834667 289.715985 
 127.233889 35.834778 288.105966 
 127.234000 35.834778 290.199218 
 127.234000 35.834889 288.551410 
 127.234000 35.835000 286.904820 
 127.234111 35.835000 288.709617 
 127.234111 35.835111 287.024415 
 127.234111 35.835222 285.340655 
 127.234222 35.835222 286.853025 
 127.234222 35.835333 285.127120 
 127.234222 35.835444 283.408874 
 127.234222 35.835556 281.692801 
 127.234333 35.835556 282.857763 
 127.234333 35.835667 281.102337 
 127.234333 35.835778 279.349463 
 127.234444 35.835778 280.212660 
 127.234444 35.835889 278.420599 
 127.234444 35.836000 276.631544 
 127.234556 35.836000 277.190304 
 127.234556 35.836111 275.359507 
 127.234556 35.836222 273.538530 
 127.234667 35.836222 273.794194 
 127.234667 35.836333 271.929130 
 127.234667 35.836444 270.074611 
 127.234778 35.836444 270.029030 
 127.234778 35.836556 268.131581 
 127.234778 35.836667 266.245474 
 127.234778 35.836778 264.364678 
 127.234889 35.836778 263.974986 
 127.234889 35.836889 262.056289 
 127.234889 35.837000 260.150249 
 127.235000 35.837000 259.470627 
 127.235000 35.837111 257.525338 
 127.235000 35.837222 255.593637 
 127.235111 35.837222 254.630743 
 127.235111 35.837333 252.661933 
 127.235111 35.837444 250.707696 
 127.235222 35.837444 249.472398 
 127.235222 35.837556 247.483565 
 127.235222 35.837667 245.510343 
 127.235333 35.837667 244.011644 
 127.235333 35.837778 242.006560 
 127.235333 35.837889 240.014757 
 127.235333 35.838000 238.040095 
 127.235444 35.838000 236.253655 
 127.235444 35.838111 234.250848 
 127.235444 35.838222 232.266297 
 127.235556 35.838222 230.244511 
 127.235556 35.838333 228.235105 
 127.235556 35.838444 226.245099 
 127.235667 35.838444 224.006463 
 127.235667 35.838556 221.995166 
 127.235667 35.838667 220.001020 
 127.235778 35.838667 217.558498 
 127.235778 35.838778 215.553638 
 127.235778 35.838889 213.563647 
 127.235778 35.839000 211.595810 
 127.235889 35.839000 208.941900 
 127.235889 35.839111 206.961163 
 127.235889 35.839222 205.003745 
 127.236000 35.839222 202.184660 
 127.236000 35.839333 200.218356 
 127.236000 35.839445 198.273207 
 127.236111 35.839445 195.312788 
 127.236111 35.839556 193.369589 
 127.236111 35.839667 191.445363 
 127.236222 35.839667 188.359163 
 127.236222 35.839778 186.440986 
 127.236222 35.839889 184.542986 
 127.236333 35.839889 181.356519 
 127.236333 35.840000 179.468714 
 127.236333 35.840111 177.602278 
 127.236333 35.840222 175.763987 
 127.236444 35.840222 172.479497 
 127.236444 35.840333 170.649891 
 127.236444 35.840445 168.846373 
 127.236556 35.840445 165.507211 
 127.236556 35.840556 163.722737 
 127.236556 35.840667 161.962296 
 127.236667 35.840667 158.584697 
 127.236667 35.840778 156.847249 
 127.236667 35.840889 155.134900 
 127.236778 35.840889 151.745548 
 127.236778 35.841000 150.060035 
 127.236778 35.841111 148.400636 
 127.236889 35.841111 145.015441 
 127.236889 35.841222 143.383790 
 127.236889 35.841333 141.784758 
 127.236889 35.841445 140.213073 
 127.237000 35.841445 136.859483 
 127.237000 35.841556 135.322335 
 127.237000 35.841667 133.813388 
 127.237111 35.841667 130.508035 
 127.237111 35.841778 129.036883 
 127.237111 35.841889 127.594708 
 127.237222 35.841889 124.362503 
 127.237222 35.842000 122.961139 
 127.237222 35.842111 121.589442 
 127.237333 35.842111 118.444339 
 127.237333 35.842222 117.113961 
 127.237333 35.842333 115.818363 
 127.237444 35.842333 112.783460 
 127.237444 35.842444 111.529523 
 127.237444 35.842555 110.310602 
 127.237444 35.842667 109.122558 
 127.237556 35.842667 106.223558 
 127.237556 35.842778 105.083885 
 127.237556 35.842889 103.975450 
 127.237667 35.842889 101.221596 
 127.237667 35.843000 100.161494 
 127.237667 35.843111 99.136467 
 127.237778 35.843111 96.538233 
 127.237778 35.843222 95.561325 
 127.237778 35.843333 94.619340 
 127.237889 35.843333 92.194325 
 127.237889 35.843444 91.301798 
 127.237889 35.843555 90.443922 
 127.238000 35.843555 88.200521 
 127.238000 35.843667 87.393101 
 127.238000 35.843778 86.618634 
 127.238000 35.843889 85.878234 
 127.238111 35.843889 83.850333 
 127.238111 35.844000 83.160792 
 127.238111 35.844111 82.504766 
 127.238222 35.844111 80.679392 
 127.238222 35.844222 80.074366 
 127.238222 35.844333 79.502178 
 127.238333 35.844333 77.889730 
 127.238333 35.844444 77.368258 
 127.238333 35.844555 76.878827 
 127.238444 35.844555 75.482762 
 127.238444 35.844667 75.043395 
 127.238444 35.844778 74.634477 
 127.238556 35.844778 73.461417 
 127.238556 35.844889 73.102802 
 127.238556 35.845000 72.773099 
 127.238556 35.845111 72.473134 
 127.238667 35.845111 71.542861 
 127.238667 35.845222 71.289781 
 127.238667 35.845333 71.065271 
 127.238778 35.845333 70.360195 
 127.238778 35.845444 70.180635 
 127.238778 35.845556 70.028134 
 127.238889 35.845556 69.547937 
 127.238889 35.845667 69.438512 
 127.238889 35.845778 69.354682 
 127.239000 35.845778 69.096369 
 127.239000 35.845889 69.052721 
 127.239000 35.846000 69.033430 
 127.239111 35.846000 68.993671 
 127.239111 35.846111 69.011313 
 127.239111 35.846222 69.051976 
 127.239111 35.846333 69.115213 
 127.239222 35.846333 69.299687 
 127.239222 35.846444 69.395188 
 127.239222 35.846556 69.511867 
 127.239333 35.846556 69.900483 
 127.239333 35.846667 70.045520 
 127.239333 35.846778 70.210211 
 127.239444 35.846778 70.795381 
 127.239444 35.846889 70.984280 
 127.239444 35.847000 71.191235 
 127.239556 35.847000 71.962599 
 127.239556 35.847111 72.189375 
 127.239556 35.847222 72.432551 
 127.239667 35.847222 73.380703 
 127.239667 35.847333 73.639579 
 127.239667 35.847444 73.912233 
 127.239667 35.847556 74.199118 
 127.239778 35.847556 75.308132 
 127.239778 35.847667 75.604193 
 127.239778 35.847778 75.912739 
 127.239889 35.847778 77.171455 
 127.239889 35.847889 77.484289 
 127.239889 35.848000 77.807840 
 127.240000 35.848000 79.200750 
 127.240000 35.848111 79.524195 
 127.240000 35.848222 79.855454 
 127.240111 35.848222 81.370519 
 127.240111 35.848333 81.697225 
 127.240111 35.848444 82.029965 
 127.240222 35.848444 83.650052 
 127.240222 35.848556 83.973241 
 127.240222 35.848667 84.300725 
 127.240333 35.848778 86.326123 
 127.240333 35.848889 86.641660 
 127.240333 35.849000 86.960480 
 127.240444 35.849000 88.724462 
 127.240444 35.849111 89.022035 
 127.240444 35.849222 89.320212 
 127.240556 35.849222 91.142494 
 127.240556 35.849333 91.415162 
 127.240556 35.849444 91.686932 
 127.240667 35.849444 93.549197 
 127.240667 35.849556 93.790843 
 127.240667 35.849667 94.030190 
 127.240778 35.849667 95.920076 
 127.240778 35.849778 96.124830 
 127.240778 35.849889 96.326336 
 127.240889 35.850000 98.387982 
 127.240889 35.850111 98.545876 
 127.240889 35.850222 98.698776 
 127.241000 35.850222 100.558299 
 127.241000 35.850333 100.667566 
 127.241000 35.850444 100.770847 
 127.241111 35.850444 102.609280 
 127.241111 35.850556 102.665416 
 127.241111 35.850667 102.714798 
 127.241222 35.850667 104.521987 
 127.241222 35.850778 104.520910 
 127.241222 35.850889 104.512290 
 127.241333 35.850889 106.273375 
 127.241333 35.851000 106.211715 
 127.241333 35.851111 106.141767 
 127.241444 35.851111 107.848363 
 127.241444 35.851222 107.723135 
 127.241444 35.851333 107.589032 
 127.241444 35.851444 107.446521 
 127.241556 35.851444 109.037258 
 127.241556 35.851556 108.836840 
 127.241556 35.851667 108.627501 
 127.241667 35.851667 110.143291 
 127.241667 35.851778 109.875390 
 127.241667 35.851889 109.598026 
 127.241778 35.851889 111.029105 
 127.241778 35.852000 110.692474 
 127.241778 35.852111 110.346343 
 127.241889 35.852111 111.688736 
 127.241889 35.852222 111.283020 
 127.241889 35.852333 110.867939 
 127.242000 35.852333 112.114618 
 127.242000 35.852445 111.639356 
 127.242000 35.852556 111.156683 
 127.242000 35.852667 110.665212 
 127.242111 35.852667 111.762803 
 127.242111 35.852778 111.212912 
 127.242111 35.852889 110.654746 
 127.242222 35.852889 111.651254 
 127.242222 35.853000 111.035922 
 127.242222 35.853111 110.413001 
 127.242333 35.853111 111.309273 
 127.242333 35.853222 110.630791 
 127.242333 35.853333 109.945560 
 127.242444 35.853333 110.740743 
 127.242444 35.853445 110.000772 
 127.242444 35.853556 109.257590 
 127.242556 35.853556 109.954702 
 127.242556 35.853667 109.157811 
 127.242556 35.853778 108.359030 
 127.242556 35.853889 107.556110 
 127.242667 35.853889 108.110062 
 127.242667 35.854000 107.259763 
 127.242667 35.854111 106.406611 
 127.242778 35.854111 106.870905 
 127.242778 35.854222 105.971983 
 127.242778 35.854333 105.074697 
 127.242889 35.854333 105.453800 
 127.242889 35.854445 104.512627 
 127.242889 35.854556 103.574724 
 127.243000 35.854556 103.875302 
 127.243000 35.854667 102.897041 
 127.243000 35.854778 101.923749 
 127.243111 35.854778 102.152159 
 127.243111 35.854889 101.142308 
 127.243111 35.855000 100.137446 
 127.243111 35.855111 99.139905 
 127.243222 35.855111 99.267443 
 127.243222 35.855222 98.238362 
 127.243222 35.855333 97.218377 
 127.243333 35.855333 97.291681 
 127.243333 35.855444 96.244238 
 127.243333 35.855555 95.207671 
 127.243444 35.855555 95.235273 
 127.243444 35.855667 94.175327 
 127.243444 35.855778 93.128024 
 127.243556 35.855778 93.118510 
 127.243556 35.855889 92.051959 
 127.243556 35.856000 90.997985 
 127.243667 35.856000 90.960017 
 127.243667 35.856111 89.894479 
 127.243667 35.856222 88.841364 
 127.243778 35.856333 87.723014 
 127.243778 35.856444 86.676374 
 127.243778 35.856555 85.647967 
 127.243889 35.856555 85.557005 
 127.243889 35.856667 84.522196 
 127.243889 35.856778 83.505405 
 127.244000 35.856778 83.413528 
 127.244000 35.856889 82.397428 
 127.244000 35.857000 81.399029 
 127.244111 35.857000 81.313762 
 127.244111 35.857111 80.319314 
 127.244111 35.857222 79.343948 
 127.244222 35.857222 79.272463 
 127.244222 35.857333 78.304038 
 127.244222 35.857444 77.355967 
 127.244333 35.857444 77.304719 
 127.244333 35.857556 76.364675 
 127.244333 35.857667 75.449330 
 127.244333 35.857778 74.555934 
 127.244444 35.857778 74.517402 
 127.244444 35.857889 73.636468 
 127.244444 35.858000 72.778464 
 127.244556 35.858000 72.771842 
 127.244556 35.858111 71.928171 
 127.244556 35.858222 71.108276 
 127.244667 35.858222 71.137370 
 127.244667 35.858333 70.333275 
 127.244667 35.858444 69.553656 
 127.244778 35.858444 69.621336 
 127.244778 35.858556 68.857322 
 127.244778 35.858667 68.120916 
 127.244889 35.858667 68.229285 
 127.244889 35.858778 67.507954 
 127.244889 35.858889 66.814487 
 127.244889 35.859000 66.146659 
 127.245000 35.859000 66.286516 
 127.245000 35.859111 65.636554 
 127.245000 35.859222 65.012443 
 127.245111 35.859222 65.194145 
 127.245111 35.859333 64.586695 
 127.245111 35.859444 64.007203 
 127.245222 35.859444 64.229527 
 127.245222 35.859556 63.665221 
 127.245222 35.859667 63.128654 
 127.245333 35.859667 63.390183 
 127.245333 35.859778 62.868065 
 127.245333 35.859889 62.373339 
 127.245444 35.859889 62.671138 
 127.245444 35.860000 62.189825 
 127.245444 35.860111 61.735440 
 127.245444 35.860222 61.306366 
 127.245556 35.860222 61.624451 
 127.245556 35.860333 61.207804 
 127.245556 35.860444 60.817386 
 127.245667 35.860444 61.163565 
 127.245667 35.860556 60.783179 
 127.245667 35.860667 60.428334 
 127.245778 35.860667 60.798717 
 127.245778 35.860778 60.452042 
 127.245778 35.860889 60.130148 
 127.245889 35.860889 60.519358 
 127.245889 35.861000 60.203635 
 127.245889 35.861111 59.911393 
 127.246000 35.861111 60.314955 
 127.246000 35.861222 60.027736 
 127.246000 35.861333 59.762670 
 127.246000 35.861444 59.520486 
 127.246111 35.861444 59.912475 
 127.246111 35.861556 59.671509 
 127.246111 35.861667 59.452535 
 127.246222 35.861667 59.847099 
 127.246222 35.861778 59.627089 
 127.246222 35.861889 59.427852 
 127.246333 35.861889 59.819275 
 127.246333 35.862000 59.617505 
 127.246333 35.862111 59.435289 
 127.246444 35.862111 59.819417 
 127.246444 35.862222 59.632465 
 127.246444 35.862333 59.464267 
 127.246556 35.862333 59.836061 
 127.246556 35.862444 59.661089 
 127.246556 35.862556 59.504104 
 127.246667 35.862667 59.694516 
 127.246667 35.862778 59.546116 
 127.246667 35.862889 59.415110 
 127.246778 35.862889 59.723529 
 127.246778 35.863000 59.581660 
 127.246778 35.863111 59.456273 
 127.246889 35.863111 59.742006 
 127.246889 35.863222 59.604355 
 127.246889 35.863333 59.482625 
 127.247000 35.863333 59.743396 
 127.247000 35.863444 59.608319 
 127.247000 35.863556 59.488691 
 127.247111 35.863556 59.723880 
 127.247111 35.863667 59.589855 
 127.247111 35.863778 59.471340 
 127.247222 35.863778 59.680392 
 127.247222 35.863889 59.546789 
 127.247222 35.864000 59.428426 
 127.247222 35.864111 59.324836 
 127.247333 35.864111 59.478700 
 127.247333 35.864222 59.360136 
 127.247333 35.864333 59.256214 
 127.247444 35.864333 59.386513 
 127.247444 35.864445 59.267690 
 127.247444 35.864556 59.163876 
 127.247556 35.864556 59.273435 
 127.247556 35.864667 59.155074 
 127.247556 35.864778 59.051819 
 127.247667 35.864778 59.143909 
 127.247667 35.864889 59.027018 
 127.247667 35.865000 58.925440 
 127.247778 35.865000 59.004423 
 127.247778 35.865111 58.890384 
 127.247778 35.865222 58.791969 
 127.247778 35.865333 58.708926 
 127.247889 35.865333 58.753271 
 127.247889 35.865445 58.659789 
 127.247889 35.865556 58.582423 
 127.248000 35.865556 58.625393 
 127.248000 35.865667 58.539229 
 127.248000 35.865778 58.469702 
 127.248111 35.865778 58.517440 
 127.248111 35.865889 58.441178 
 127.248111 35.866000 58.382151 
 127.248222 35.866000 58.441335 
 127.248222 35.866111 58.377792 
 127.248222 35.866222 58.332079 
 127.248333 35.866222 58.409452 
 127.248333 35.866333 58.361790 
 127.248333 35.866445 58.332601 
 127.248333 35.866556 58.322171 
 127.248444 35.866556 58.406615 
 127.248444 35.866667 58.397188 
 127.248444 35.866778 58.407275 
 127.248556 35.866778 58.525665 
 127.248556 35.866889 58.539353 
 127.248556 35.867000 58.573329 
 127.248667 35.867000 58.732701 
 127.248667 35.867111 58.772856 
 127.248667 35.867222 58.834200 
 127.248778 35.867222 59.040802 
 127.248778 35.867333 59.110662 
 127.248778 35.867444 59.202629 
 127.248889 35.867444 59.462868 
 127.248889 35.867555 59.565696 
 127.248889 35.867667 59.691480 
 127.249000 35.867667 60.010397 
 127.249000 35.867778 60.149258 
 127.249000 35.867889 60.311894 
 127.249000 35.868000 60.498260 
 127.249111 35.868000 60.872752 
 127.249111 35.868111 61.074694 
 127.249111 35.868222 61.301382 
 127.249222 35.868222 61.744185 
 127.249222 35.868333 61.988191 
 127.249222 35.868444 62.257633 
 127.249333 35.868444 62.772115 
 127.249333 35.868555 63.060329 
 127.249333 35.868667 63.374591 
 127.249444 35.868667 63.961518 
 127.249444 35.868778 64.296301 
 127.249444 35.868889 64.656460 
 127.249556 35.868889 65.317146 
 127.249556 35.869000 65.699311 
 127.249556 35.869111 66.107109 
 127.249556 35.869222 66.542001 
 127.249667 35.869222 67.270694 
 127.249667 35.869333 67.726894 
 127.249667 35.869444 68.210473 
 127.249778 35.869444 69.008801 
 127.249778 35.869555 69.513676 
 127.249778 35.869667 70.046098 
 127.249889 35.869667 70.911590 
 127.249889 35.869778 71.465877 
 127.249889 35.869889 72.045806 
 127.250000 35.869889 72.972069 
 127.250000 35.870000 73.574129 
 127.250000 35.870111 74.201593 
 127.250111 35.870111 75.183743 
 127.250111 35.870222 75.832311 
 127.250111 35.870333 76.505926 
 127.250111 35.870444 77.206790 
 127.250222 35.870444 78.228163 
 127.250222 35.870556 78.947316 
 127.250222 35.870667 79.690854 
 127.250333 35.870667 80.750407 
 127.250333 35.870778 81.511558 
 127.250333 35.870889 82.296483 
 127.250444 35.870889 83.382459 
 127.250444 35.871000 84.182816 
 127.250444 35.871111 85.006239 
 127.250556 35.871111 86.109260 
 127.250556 35.871222 86.945606 
 127.250556 35.871333 87.804222 
 127.250667 35.871333 88.910640 
 127.250667 35.871444 89.779415 
 127.250667 35.871556 90.671137 
 127.250778 35.871667 92.665806 
 127.250778 35.871778 93.585168 
 127.250778 35.871889 94.524661 
 127.250889 35.871889 95.581793 
 127.250889 35.872000 96.524611 
 127.250889 35.872111 97.486555 
 127.251000 35.872111 98.506964 
 127.251000 35.872222 99.468843 
 127.251000 35.872333 100.450513 
 127.251111 35.872333 101.418741 
 127.251111 35.872444 102.393543 
 127.251111 35.872556 103.388765 
 127.251222 35.872556 104.292552 
 127.251222 35.872667 105.277358 
 127.251222 35.872778 106.281559 
 127.251333 35.872778 107.105880 
 127.251333 35.872889 108.096197 
 127.251333 35.873000 109.104883 
 127.251333 35.873111 110.129909 
 127.251444 35.873111 110.830892 
 127.251444 35.873222 111.837907 
 127.251444 35.873333 112.861969 
 127.251556 35.873333 113.455508 
 127.251556 35.873444 114.458360 
 127.251556 35.873556 115.477283 
 127.251667 35.873556 115.952523 
 127.251667 35.873667 116.947184 
 127.251667 35.873778 117.956983 
 127.251778 35.873778 118.302348 
 127.251778 35.873889 119.285135 
 127.251778 35.874000 120.282192 
 127.251889 35.874000 120.488475 
 127.251889 35.874111 121.457670 
 127.251889 35.874222 122.436986 
 127.251889 35.874333 123.429502 
 127.252000 35.874333 123.446318 
 127.252000 35.874444 124.406747 
 127.252000 35.874556 125.379677 
 127.252111 35.874556 125.240293 
 127.252111 35.874667 126.179363 
 127.252111 35.874778 127.130333 
 127.252222 35.874778 126.829543 
 127.252222 35.874889 127.746911 
 127.252222 35.875000 128.672506 
 127.252333 35.875000 128.205961 
 127.252333 35.875111 129.098499 
 127.252333 35.875222 129.998953 
 127.252444 35.875222 129.365111 
 127.252444 35.875333 130.231899 
 127.252444 35.875444 131.106402 
 127.252444 35.875556 131.991440 
 127.252556 35.875556 131.144190 
 127.252556 35.875667 131.993846 
 127.252556 35.875778 132.850942 
 127.252667 35.875778 131.837368 
 127.252667 35.875889 132.660879 
 127.252667 35.876000 133.491864 
 127.252778 35.876000 132.313278 
 127.252778 35.876111 133.111282 
 127.252778 35.876222 133.916894 
 127.252889 35.876222 132.579600 
 127.252889 35.876333 133.353271 
 127.252889 35.876444 134.134773 
 127.253000 35.876444 132.642625 
 127.253000 35.876556 133.393505 
 127.253000 35.876667 134.153832 
 127.253111 35.876778 133.245282 
 127.253111 35.876889 133.985149 
 127.253111 35.877000 134.733409 
 127.253222 35.877000 132.919002 
 127.253222 35.877111 133.640745 
 127.253222 35.877222 134.371311 
 127.253333 35.877222 132.432170 
 127.253333 35.877333 133.138455 
 127.253333 35.877445 133.855270 
 127.253444 35.877445 131.799209 
 127.253444 35.877556 132.491672 
 127.253444 35.877667 133.196315 
 127.253556 35.877667 131.038316 
 127.253556 35.877778 131.721172 
 127.253556 35.877889 132.416666 
 127.253667 35.877889 130.165677 
 127.253667 35.878000 130.841959 
 127.253667 35.878111 131.531337 
 127.253667 35.878222 132.231341 
 127.253778 35.878222 129.876429 
 127.253778 35.878333 130.562754 
 127.253778 35.878445 131.261356 
 127.253889 35.878445 128.841148 
 127.253889 35.878556 129.526190 
 127.253889 35.878667 130.225068 
 127.254000 35.878667 127.756404 
 127.254000 35.878778 128.444150 
 127.254000 35.878889 129.146071 
 127.254111 35.878889 126.637924 
 127.254111 35.879000 127.330937 
 127.254111 35.879111 128.038396 
 127.254222 35.879111 125.507182 
 127.254222 35.879222 126.208995 
 127.254222 35.879333 126.923011 
 127.254222 35.879445 127.651482 
 127.254333 35.879445 125.088097 
 127.254333 35.879556 125.811729 
 127.254333 35.879667 126.549889 
 127.254444 35.879667 123.988175 
 127.254444 35.879778 124.722910 
 127.254444 35.879889 125.472144 
 127.254556 35.879889 122.918342 
 127.254556 35.880000 123.666507 
 127.254556 35.880111 124.426437 
 127.254667 35.880111 121.893834 
 127.254667 35.880222 122.654743 
 127.254667 35.880333 123.427120 
 127.254778 35.880333 120.919973 
 127.254778 35.880444 121.693712 
 127.254778 35.880555 122.478505 
 127.254778 35.880667 123.276699 
 127.254889 35.880667 120.794005 
 127.254889 35.880778 121.590713 
 127.254889 35.880889 122.400308 
 127.255000 35.880889 119.956242 
 127.255000 35.881000 120.765257 
 127.255000 35.881111 121.583736 
 127.255111 35.881111 119.184686 
 127.255111 35.881222 120.003157 
 127.255111 35.881333 120.830334 
 127.255222 35.881333 118.481315 
 127.255222 35.881444 119.307337 
 127.255222 35.881555 120.141222 
 127.255333 35.881555 117.840566 
 127.255333 35.881667 118.671811 
 127.255333 35.881778 119.511451 
 127.255333 35.881889 120.357563 
 127.255444 35.881889 118.096008 
 127.255444 35.882000 118.937232 
 127.255444 35.882111 119.783950 
 127.255556 35.882111 117.570541 
 127.255556 35.882222 118.410322 
 127.255556 35.882333 119.254585 
 127.255667 35.882333 117.091549 
 127.255667 35.882444 117.926674 
 127.255667 35.882556 118.766703 
 127.255778 35.882556 116.648597 
 127.255778 35.882667 117.474277 
 127.255778 35.882778 118.305248 
 127.255889 35.882778 116.232771 
 127.255889 35.882889 117.047055 
 127.255889 35.883000 117.865608 
 127.255889 35.883111 118.685189 
 127.256000 35.883111 116.631911 
 127.256000 35.883222 117.434724 
 127.256000 35.883333 118.237669 
 127.256111 35.883333 116.222114 
 127.256111 35.883444 117.006060 
 127.256111 35.883556 117.790678 
 127.256222 35.883556 115.806219 
 127.256222 35.883667 116.567087 
 127.256222 35.883778 117.329202 
 127.256333 35.883778 115.375702 
 127.256333 35.883889 116.112335 
 127.256333 35.884000 116.849570 
 127.256444 35.884000 114.921014 
 127.256444 35.884111 115.631320 
 127.256444 35.884222 116.341735 
 127.256444 35.884333 117.050813 
 127.256556 35.884333 115.122369 
 127.256556 35.884444 115.803453 
 127.256556 35.884556 116.484158 
 127.256667 35.884556 114.576128 
 127.256667 35.884667 115.228375 
 127.256667 35.884778 115.880180 
 127.256778 35.884778 113.995046 
 127.256778 35.884889 114.618492 
 127.256778 35.885000 115.241650 
 127.256889 35.885000 113.377030 
 127.256889 35.885111 113.972461 
 127.256889 35.885222 114.567990 
 127.257000 35.885222 112.728604 
 127.257000 35.885333 113.298672 
 127.257000 35.885444 113.867511 
 127.257000 35.885556 114.437199 
 127.257111 35.885556 112.599820 
 127.257111 35.885667 113.145767 
 127.257111 35.885778 113.693522 
 127.257222 35.885778 111.890598 
 127.257222 35.885889 112.417388 
 127.257222 35.886000 112.947204 
 127.257333 35.886000 111.182402 
 127.257333 35.886111 111.695557 
 127.257333 35.886222 112.211447 
 127.257444 35.886222 110.495547 
 127.257444 35.886333 110.999772 
 127.257444 35.886444 111.508492 
 127.257556 35.886444 109.848348 
 127.257556 35.886556 110.350140 
 127.257556 35.886667 110.858416 
 127.257556 35.886778 111.375396 
 127.257667 35.886778 109.774410 
 127.257667 35.886889 110.290745 
 127.257667 35.887000 110.816267 
 127.257778 35.887000 109.298342 
 127.257778 35.887111 109.830268 
 127.257778 35.887222 110.373810 
 127.257889 35.887222 108.955412 
 127.257889 35.887333 109.512088 
 127.257889 35.887444 110.082963 
 127.258000 35.887444 108.777092 
 127.258000 35.887556 109.368316 
 127.258000 35.887667 109.976453 
 127.258111 35.887667 108.801313 
 127.258111 35.887778 109.437422 
 127.258111 35.887889 110.094398 
 127.258222 35.887889 109.065081 
 127.258222 35.888000 109.755675 
 127.258222 35.888111 110.471279 
 127.258222 35.888222 111.210118 
 127.258333 35.888222 110.363967 
 127.258333 35.888333 111.149283 
 127.258333 35.888444 111.960719 
 127.258444 35.888444 111.300892 
 127.258444 35.888556 112.167145 
 127.258444 35.888667 113.063941 
 127.258556 35.888667 112.609152 
 127.258556 35.888778 113.565868 
 127.258556 35.888889 114.557697 
 127.258667 35.888889 114.324433 
 127.258667 35.889000 115.384046 
 127.258667 35.889111 116.481803 
 127.258778 35.889111 116.486950 
 127.258778 35.889222 117.660016 
 127.258778 35.889333 118.874132 
 127.258778 35.889444 120.125656 
 127.258889 35.889444 120.429816 
 127.258889 35.889556 121.770212 
 127.258889 35.889667 123.152668 
 127.259000 35.889667 123.728946 
 127.259000 35.889778 125.202234 
 127.259000 35.889889 126.722303 
 127.259111 35.889889 127.583659 
 127.259111 35.890000 129.200379 
 127.259111 35.890111 130.866066 
 127.259222 35.890111 132.021254 
 127.259222 35.890222 133.788539 
 127.259222 35.890333 135.606667 
 127.259333 35.890333 137.065305 
 127.259333 35.890445 138.992530 
 127.259333 35.890556 140.965418 
 127.259333 35.890667 142.990802 
 127.259444 35.890667 144.819128 
 127.259444 35.890778 146.954052 
 127.259444 35.890889 149.142492 
 127.259556 35.890889 151.284039 
 127.259556 35.891000 153.583800 
 127.259556 35.891111 155.937670 
 127.259667 35.891111 158.387785 
 127.259667 35.891222 160.857772 
 127.259667 35.891333 163.373431 
 127.259778 35.891333 166.131441 
 127.259778 35.891445 168.767172 
 127.259778 35.891556 171.447667 
 127.259889 35.891556 174.501397 
 127.259889 35.891667 177.300535 
 127.259889 35.891778 180.143044 
 127.259889 35.891889 183.038025 
 127.260000 35.891889 186.444509 
 127.260000 35.892000 189.444503 
 127.260000 35.892111 192.495479 
 127.260111 35.892111 196.168640 
 127.260111 35.892222 199.325129 
 127.260111 35.892333 202.519673 
 127.260222 35.892333 206.446271 
 127.260222 35.892444 209.745858 
 127.260222 35.892555 213.080498 
 127.260333 35.892555 217.232029 
 127.260333 35.892667 220.664635 
 127.260333 35.892778 224.128824 
 127.260444 35.892778 228.486190 
 127.260444 35.892889 232.040073 
 127.260444 35.893000 235.627812 
 127.260444 35.893111 239.241722 
 127.260556 35.893111 243.814620 
 127.260556 35.893222 247.506009 
 127.260556 35.893333 251.219111 
 127.260667 35.893333 255.924113 
 127.260667 35.893444 259.703679 
 127.260667 35.893555 263.500117 
 127.260778 35.893555 268.309869 
 127.260778 35.893667 272.160771 
 127.260778 35.893778 276.030024 
 127.260889 35.893778 280.900119 
 127.260889 35.893889 284.797504 
 127.260889 35.894000 288.714530 
 127.261000 35.894000 293.613788 
 127.261000 35.894111 297.545052 
 127.261000 35.894222 301.490328 
 127.261000 35.894333 305.434093 
 127.261111 35.894333 310.315884 
 127.261111 35.894444 314.268992 
 127.261111 35.894555 318.214605 
 127.261222 35.894555 323.035134 
 127.261222 35.894667 326.974979 
 127.261222 35.894778 330.907962 
 127.261333 35.894778 335.617713 
 127.261333 35.894889 339.516023 
 127.261333 35.895000 343.407928 
 127.261444 35.895000 347.972354 
 127.261444 35.895111 351.814114 
 127.261444 35.895222 355.643062 
 127.261556 35.895222 360.013598 
 127.261556 35.895333 363.777040 
 127.261556 35.895444 367.521234 
 127.261556 35.895556 371.237579 
 127.261667 35.895556 375.334076 
 127.261667 35.895667 378.965650 
 127.261667 35.895778 382.569447 
 127.261778 35.895778 386.384341 
 127.261778 35.895889 389.888773 
 127.261778 35.896000 393.359152 
 127.261889 35.896000 396.861845 
 127.261889 35.896111 400.218791 
 127.261889 35.896222 403.535578 
 127.262000 35.896222 406.686578 
 127.262000 35.896333 409.876736 
 127.262000 35.896444 413.020858 
 127.262111 35.896444 415.794078 
 127.262111 35.896556 418.804307 
 127.262111 35.896667 421.752659 
 127.262222 35.896778 426.924192 
 127.262222 35.896889 429.665793 
 127.262222 35.897000 432.348759 
 127.262333 35.897000 434.189874 
 127.262333 35.897111 436.709734 
 127.262333 35.897222 439.166204 
 127.262444 35.897222 440.550080 
 127.262444 35.897333 442.838959 
 127.262444 35.897444 445.052389 
 127.262556 35.897444 445.966869 
 127.262556 35.897556 448.009075 
 127.262556 35.897667 449.972849 
 127.262667 35.897667 450.406905 
 127.262667 35.897778 452.193174 
 127.262667 35.897889 453.898568 
 127.262778 35.897889 453.848180 
 127.262778 35.898000 455.371168 
 127.262778 35.898111 456.813807 
 127.262778 35.898222 458.172959 
 127.262889 35.898222 457.531641 
 127.262889 35.898333 458.704188 
 127.262889 35.898444 459.792105 
 127.263000 35.898444 458.671685 
 127.263000 35.898556 459.571704 
 127.263000 35.898667 460.386525 
 127.263111 35.898667 458.800284 
 127.263111 35.898778 459.427706 
 127.263111 35.898889 459.969935 
 127.263222 35.898889 457.931916 
 127.263222 35.899000 458.288693 
 127.263222 35.899111 458.561238 
 127.263333 35.899111 456.095836 
 127.263333 35.899222 456.185984 
 127.263333 35.899333 456.192783 
 127.263333 35.899444 456.116229 
 127.263444 35.899444 453.152701 
 127.263444 35.899556 452.900440 
 127.263444 35.899667 452.566611 
 127.263556 35.899667 449.238697 
 127.263556 35.899778 448.736142 
 127.263556 35.899889 448.153217 
 127.263667 35.899889 444.490930 
 127.263667 35.900000 443.749730 
 127.263667 35.900111 442.929262 
 127.263778 35.900111 438.977475 
 127.263778 35.900222 438.009043 
 127.263778 35.900333 436.963681 
 127.263889 35.900333 432.758448 
 127.263889 35.900444 431.576363 
 127.263889 35.900556 430.320096 
 127.263889 35.900667 428.994721 
 127.264000 35.900667 424.532243 
 127.264000 35.900778 423.080418 
 127.264000 35.900889 421.560697 
 127.264111 35.900889 416.945687 
 127.264111 35.901000 415.317368 
 127.264111 35.901111 413.622235 
 127.264222 35.901111 408.911400 
 127.264222 35.901222 407.121359 
 127.264222 35.901333 405.268265 
 127.264333 35.901333 400.504764 
 127.264333 35.901444 398.570772 
 127.264333 35.901556 396.577684 
 127.264444 35.901556 391.820057 
 127.264444 35.901667 389.756740 
 127.264444 35.901778 387.645600 
 127.264444 35.901889 385.480528 
 127.264556 35.901889 380.766652 
 127.264556 35.902000 378.552497 
 127.264556 35.902111 376.288623 
 127.264667 35.902111 371.691846 
 127.264667 35.902222 369.392997 
 127.264667 35.902333 367.048653 
 127.264778 35.902333 362.611056 
 127.264778 35.902445 360.241417 
 127.264778 35.902556 357.838673 
 127.264889 35.902556 353.614767 
 127.264889 35.902667 351.195818 
 127.264889 35.902778 348.748020 
 127.265000 35.902778 344.776585 
 127.265000 35.902889 342.325125 
 127.265000 35.903000 339.848875 
 127.265000 35.903111 337.340473 
 127.265111 35.903111 333.710734 
 127.265111 35.903222 331.221635 
 127.265111 35.903333 328.704118 
 127.265222 35.903333 325.417017 
 127.265222 35.903445 322.925327 
 127.265222 35.903556 320.417317 
 127.265333 35.903556 317.513513 
 127.265333 35.903667 315.036791 
 127.265333 35.903778 312.546920 
 127.265444 35.903778 310.053565 
 127.265444 35.903889 307.603774 
 127.265444 35.904000 305.143665 
 127.265556 35.904000 303.092246 
 127.265556 35.904111 300.679782 
 127.265556 35.904222 298.255296 
 127.265556 35.904333 295.823856 
 127.265667 35.904333 294.303868 
 127.265667 35.904445 291.927841 
 127.265667 35.904556 289.546880 
 127.265778 35.904556 288.513136 
 127.265778 35.904667 286.192439 
 127.265778 35.904778 283.868447 
 127.265889 35.904778 283.332676 
 127.265889 35.904889 281.072661 
 127.265889 35.905000 278.806711 
 127.266000 35.905000 278.778736 
 127.266000 35.905111 276.586836 
 127.266000 35.905222 274.386231 
 127.266111 35.905222 274.869563 
 127.266111 35.905333 272.743897 
 127.266111 35.905444 270.610279 
 127.266111 35.905555 268.476517 
 127.266222 35.905555 269.546468 
 127.266222 35.905667 267.480058 
 127.266222 35.905778 265.413613 
 127.266333 35.905778 266.987472 
 127.266333 35.905889 264.986909 
 127.266333 35.906000 262.982659 
 127.266444 35.906000 265.053382 
 127.266444 35.906111 263.119375 
 127.266444 35.906222 261.177969 
 127.266556 35.906222 263.728672 
 127.266556 35.906333 261.853809 
 127.266556 35.906444 259.971000 
 127.266667 35.906444 262.988547 
 127.266667 35.906555 261.167827 
 127.266667 35.906667 259.338375 
 127.266667 35.906778 257.503514 
 127.266778 35.906778 261.021899 
 127.266778 35.906889 259.242567 
 127.266778 35.907000 257.453667 
 127.266889 35.907000 261.391126 
 127.266889 35.907111 259.651785 
 127.266889 35.907222 257.901696 
 127.267000 35.907222 262.225734 
 127.267000 35.907333 260.518670 
 127.267000 35.907444 258.799558 
 127.267111 35.907444 263.488496 
 127.267111 35.907555 261.805594 
 127.267111 35.907667 260.109265 
 127.267222 35.907667 265.125599 
 127.267222 35.907778 263.455488 
 127.267222 35.907889 261.776291 
 127.267222 35.908000 260.082385 
 127.267333 35.908000 265.433384 
 127.267333 35.908111 263.759849 
 127.267333 35.908222 262.070205 
 127.267444 35.908222 267.678457 
 127.267444 35.908333 266.002027 
 127.267444 35.908444 264.308137 
 127.267556 35.908444 270.149544 
 127.267556 35.908556 268.458990 
 127.267556 35.908667 266.755542 
 127.267667 35.908667 272.788006 
 127.267667 35.908778 271.078222 
 127.267667 35.908889 269.354463 
 127.267778 35.909000 273.818232 
 127.267778 35.909111 272.066836 
 127.267778 35.909222 270.294898 
 127.267889 35.909222 276.622996 
 127.267889 35.909333 274.834168 
 127.267889 35.909444 273.030209 
 127.268000 35.909444 279.458329 
 127.268000 35.909556 277.629117 
 127.268000 35.909667 275.784350 
 127.268111 35.909667 282.272769 
 127.268111 35.909778 280.398011 
 127.268111 35.909889 278.507514 
 127.268222 35.909889 285.038163 
 127.268222 35.910000 283.113572 
 127.268222 35.910111 281.173305 
 127.268222 35.910222 279.211347 
 127.268333 35.910222 285.731574 
 127.268333 35.910333 283.735010 
 127.268333 35.910444 281.723858 
 127.268444 35.910444 288.231917 
 127.268444 35.910556 286.180267 
 127.268444 35.910667 284.114676 
 127.268556 35.910667 290.577849 
 127.268556 35.910778 288.469973 
 127.268556 35.910889 286.349057 
 127.268667 35.910889 292.756878 
 127.268667 35.911000 290.592568 
 127.268667 35.911111 288.412603 
 127.268778 35.911111 294.736358 
 127.268778 35.911222 292.520183 
 127.268778 35.911333 290.285833 
 127.268778 35.911444 288.042003 
 127.268889 35.911444 294.248663 
 127.268889 35.911556 291.961769 
 127.268889 35.911667 289.667033 
 127.269000 35.911667 295.757797 
 127.269000 35.911778 293.421063 
 127.269000 35.911889 291.074271 
 127.269111 35.911889 297.046053 
 127.269111 35.912000 294.666972 
 127.269111 35.912111 292.275659 
 127.269222 35.912111 298.108254 
 127.269222 35.912222 295.686926 
 127.269222 35.912333 293.255349 
 127.269333 35.912333 298.948559 
 127.269333 35.912444 296.489615 
 127.269333 35.912556 294.022530 
 127.269333 35.912667 291.557002 
 127.269444 35.912667 297.068090 
 127.269444 35.912778 294.570733 
 127.269444 35.912889 292.072965 
 127.269556 35.912889 297.430721 
 127.269556 35.913000 294.912959 
 127.269556 35.913111 292.392776 
 127.269667 35.913111 297.583410 
 127.269667 35.913222 295.046738 
 127.269667 35.913333 292.509958 
 127.269778 35.913333 297.537033 
 127.269778 35.913444 294.987318 
 127.269778 35.913556 292.439809 
 127.269889 35.913556 297.291574 
 127.269889 35.913667 294.730338 
 127.269889 35.913778 292.182381 
 127.269889 35.913889 289.640124 
 127.270000 35.913889 294.300535 
 127.270000 35.914000 291.753477 
 127.270000 35.914111 289.214322 
 127.270111 35.914111 293.694620 
 127.270111 35.914222 291.154014 
 127.270111 35.914333 288.623431 
 127.270222 35.914333 292.927850 
 127.270222 35.914444 290.398931 
 127.270222 35.914556 287.882041 
 127.270333 35.914556 292.001147 
 127.270333 35.914667 289.484501 
 127.270333 35.914778 286.990382 
 127.270333 35.914889 284.511207 
 127.270444 35.914889 288.432362 
 127.270444 35.915000 285.960963 
 127.270444 35.915111 283.506186 
 127.270556 35.915111 287.237540 
 127.270556 35.915222 284.792687 
 127.270556 35.915333 282.365969 
 127.270667 35.915333 285.910335 
 127.270667 35.915445 283.491168 
 127.270667 35.915556 281.099750 
 127.270778 35.915556 284.448411 
 127.270778 35.915667 282.061884 
 127.270778 35.915778 279.704154 
 127.270889 35.915778 282.859082 
 127.270889 35.915889 280.507388 
 127.270889 35.916000 278.185351 
 127.270889 35.916111 275.885640 
 127.271000 35.916111 278.823078 
 127.271000 35.916222 276.534319 
 127.271000 35.916333 274.276442 
 127.271111 35.916333 277.012878 
 127.271111 35.916445 274.762334 
 127.271111 35.916556 272.543103 
 127.271222 35.916556 275.070879 
 127.271222 35.916667 272.859067 
 127.271222 35.916778 270.678833 
 127.271333 35.916778 272.998791 
 127.271333 35.916889 270.825780 
 127.271333 35.917000 268.684461 
 127.271333 35.917111 266.567845 
 127.271444 35.917111 268.657328 
 127.271444 35.917222 266.550917 
 127.271444 35.917333 264.476454 
 127.271556 35.917333 266.349146 
 127.271556 35.917444 264.280634 
 127.271556 35.917556 262.243879 
 127.271667 35.917556 263.901275 
 127.271667 35.917667 261.869767 
 127.271667 35.917778 259.869734 
 127.271778 35.917778 261.308736 
 127.271778 35.917889 259.313262 
 127.271778 35.918000 257.345551 
 127.271889 35.918000 258.569013 
 127.271889 35.918111 256.611940 
 127.271889 35.918222 254.678891 
 127.271889 35.918333 252.776643 
 127.272000 35.918333 253.763826 
 127.272000 35.918444 251.864482 
 127.272000 35.918555 249.995479 
 127.272111 35.918555 250.772185 
 127.272111 35.918667 248.905733 
 127.272111 35.918778 247.069158 
 127.272222 35.918778 247.639524 
 127.272222 35.918889 245.805443 
 127.272222 35.919000 243.997709 
 127.272333 35.919000 244.369810 
 127.272333 35.919111 242.571002 
 127.272333 35.919222 240.795066 
 127.272333 35.919333 239.048149 
 127.272444 35.919333 239.211070 
 127.272444 35.919444 237.467210 
 127.272444 35.919555 235.752005 
 127.272556 35.919555 235.738182 
 127.272556 35.919667 234.027129 
 127.272556 35.919778 232.341563 
 127.272667 35.919778 232.164848 
 127.272667 35.919889 230.490801 
 127.272667 35.920000 228.839182 
 127.272778 35.920000 228.515446 
 127.272778 35.920111 226.877281 
 127.272778 35.920222 225.261541 
 127.272889 35.920222 224.809653 
 127.272889 35.920333 223.209822 
 127.272889 35.920444 221.632515 
 127.272889 35.920556 220.080538 
 127.273000 35.920556 219.511256 
 127.273000 35.920667 217.978179 
 127.273000 35.920778 216.467907 
 127.273111 35.920778 215.817406 
 127.273111 35.920889 214.329570 
 127.273111 35.921000 212.864845 
 127.273222 35.921000 212.157347 
 127.273222 35.921111 210.719052 
 127.273222 35.921222 209.304271 
 127.273333 35.921222 208.568018 
 127.273333 35.921333 207.184095 
 127.273333 35.921444 205.824175 
 127.273333 35.921556 204.490701 
 127.273444 35.921556 203.760401 
 127.273444 35.921667 202.462979 
 127.273444 35.921778 201.190205 
 127.273556 35.921778 200.495208 
 127.273556 35.921889 199.263671 
 127.273556 35.922000 198.057396 
 127.273667 35.922000 197.428513 
 127.273667 35.922111 196.268924 
 127.273667 35.922222 195.135244 
 127.273778 35.922222 194.606261 
 127.273778 35.922333 193.523020 
 127.273778 35.922444 192.470018 
 127.273889 35.922556 191.075005 
 127.273889 35.922667 190.107047 
 127.273889 35.922778 189.166310 
 127.274000 35.922778 188.969864 
 127.274000 35.922889 188.093186 
 127.274000 35.923000 187.244299 
 127.274111 35.923000 187.253323 
 127.274111 35.923111 186.472718 
 127.274111 35.923222 185.723025 
 127.274222 35.923222 185.970570 
 127.274222 35.923333 185.293266 
 127.274222 35.923444 184.646898 
 127.274333 35.923444 185.165546 
 127.274333 35.923556 184.596906 
 127.274333 35.923667 184.059070 
 127.274333 35.923778 183.549976 
 127.274444 35.923778 184.423627 
 127.274444 35.923889 183.998840 
 127.274444 35.924000 183.602807 
 127.274556 35.924000 184.812562 
 127.274556 35.924111 184.504180 
 127.274556 35.924222 184.225366 
 127.274667 35.924222 185.796113 
 127.274667 35.924333 185.607746 
 127.274667 35.924444 185.448106 
 127.274778 35.924444 187.406663 
 127.274778 35.924556 187.340324 
 127.274778 35.924667 187.301603 
 127.274778 35.924778 187.289876 
 127.274889 35.924778 189.722954 
 127.274889 35.924889 189.805840 
 127.274889 35.925000 189.914338 
 127.275000 35.925000 192.778074 
 127.275000 35.925111 192.982027 
 127.275000 35.925222 193.209814 
 127.275111 35.925222 196.514157 
 127.275111 35.925333 196.837184 
 127.275111 35.925444 197.181953 
 127.275222 35.925444 200.942889 
 127.275222 35.925556 201.381749 
 127.275222 35.925667 201.839933 
 127.275333 35.925778 206.608456 
 127.275333 35.925889 207.175952 
 127.275333 35.926000 207.759098 
 127.275444 35.926000 212.515716 
 127.275444 35.926111 213.185290 
 127.275444 35.926222 213.867373 
 127.275556 35.926222 219.081002 
 127.275556 35.926333 219.844667 
 127.275556 35.926444 220.617388 
 127.275667 35.926444 226.290165 
 127.275667 35.926556 227.138612 
 127.275667 35.926667 227.993834 
 127.275778 35.926667 234.106803 
 127.275778 35.926778 235.027639 
 127.275778 35.926889 235.952916 
 127.275778 35.927000 236.878270 
 127.275889 35.927000 243.483925 
 127.275889 35.927111 244.466925 
 127.275889 35.927222 245.445665 
 127.276000 35.927222 252.453250 
 127.276000 35.927333 253.480313 
 127.276000 35.927445 254.500308 
 127.276111 35.927445 261.898136 
 127.276111 35.927556 262.952726 
 127.276111 35.927667 263.997367 
 127.276222 35.927667 271.747439 
 127.276222 35.927778 272.815549 
 127.276222 35.927889 273.868858 
 127.276222 35.928000 274.902431 
 127.276333 35.928000 283.018710 
 127.276333 35.928111 284.063932 
 127.276333 35.928222 285.084423 
 127.276444 35.928222 293.482753 
 127.276444 35.928333 294.502396 
 127.276444 35.928445 295.493950 
 127.276556 35.928445 304.151760 
 127.276556 35.928556 305.126156 
 127.276556 35.928667 306.069036 
 127.276667 35.928667 314.934743 
 127.276667 35.928778 315.847375 
 127.276667 35.928889 316.723281 
 127.276778 35.928889 325.770945 
 127.276778 35.929000 326.603394 
 127.276778 35.929111 327.393943 
 127.276778 35.929222 328.139953 
 127.276889 35.929222 337.310527 
 127.276889 35.929333 337.996216 
 127.276889 35.929445 338.633741 
 127.277000 35.929445 347.880195 
 127.277000 35.929556 348.444501 
 127.277000 35.929667 348.955784 
 127.277111 35.929667 358.249980 
 127.277111 35.929778 358.675469 
 127.277111 35.929889 359.043286 
 127.277222 35.929889 368.328096 
 127.277222 35.930000 368.598506 
 127.277222 35.930111 368.806039 
 127.277222 35.930222 368.950665 
 127.277333 35.930222 378.152740 
 127.277333 35.930333 378.185198 
 127.277333 35.930444 378.150806 
 127.277444 35.930444 387.253113 
 127.277444 35.930555 387.096249 
 127.277444 35.930667 386.868970 
 127.277556 35.930667 395.846531 
 127.277556 35.930778 395.487344 
 127.277556 35.930889 395.054599 
 127.277667 35.930889 403.856012 
 127.277667 35.931000 403.282044 
 127.277667 35.931111 402.633942 
 127.277778 35.931111 411.237923 
 127.277778 35.931222 410.439977 
 127.277778 35.931333 409.566493 
 127.277778 35.931444 408.614544 
 127.277889 35.931444 416.897227 
 127.277889 35.931555 415.790943 
 127.277889 35.931667 414.604730 
 127.278000 35.931667 422.623794 
 127.278000 35.931778 421.276713 
 127.278000 35.931889 419.853572 
 127.278111 35.931889 427.571051 
 127.278111 35.932000 425.981668 
 127.278111 35.932111 424.316749 
 127.278222 35.932111 431.722842 
 127.278222 35.932222 429.889632 
 127.278222 35.932333 427.982017 
 127.278222 35.932444 425.994318 
 127.278333 35.932444 432.970624 
 127.278333 35.932555 430.821663 
 127.278333 35.932667 428.593714 
 127.278444 35.932667 435.225445 
 127.278444 35.932778 432.834324 
 127.278444 35.932889 430.374264 
 127.278556 35.932889 436.641495 
 127.278556 35.933000 434.017621 
 127.278556 35.933111 431.327913 
 127.278667 35.933111 437.234868 
 127.278667 35.933222 434.385853 
 127.278667 35.933333 431.474675 
 127.278778 35.933333 437.010399 
 127.278778 35.933444 433.946036 
 127.278778 35.933556 430.818292 
 127.278778 35.933667 427.634531 
 127.278889 35.933667 432.730944 
 127.278889 35.933778 429.403860 
 127.278889 35.933889 426.025616 
 127.279000 35.933889 430.764045 
 127.279000 35.934000 427.251730 
 127.279000 35.934111 423.693567 
 127.279111 35.934111 428.091567 
 127.279111 35.934222 424.409710 
 127.279111 35.934333 420.681286 
 127.279222 35.934333 424.745217 
 127.279222 35.934444 420.917715 
 127.279222 35.934556 417.042931 
 127.279333 35.934556 420.795642 
 127.279333 35.934667 416.834800 
 127.279333 35.934778 412.832623 
 127.279333 35.934889 408.805335 
 127.279444 35.934889 412.212947 
 127.279444 35.935000 408.103568 
 127.279444 35.935111 403.975784 
 127.279556 35.935111 407.119946 
 127.279556 35.935222 402.924421 
 127.279556 35.935333 398.710118 
 127.279667 35.935333 401.609564 
 127.279667 35.935444 397.357044 
 127.279667 35.935556 393.085342 
 127.279778 35.935556 395.769941 
 127.279778 35.935667 391.475500 
 127.279778 35.935778 387.168791 
 127.279889 35.935889 385.346914 
 127.279889 35.936000 381.027844 
 127.279889 35.936111 376.713551 
 127.280000 35.936111 379.040140 
 127.280000 35.936222 374.738739 
 127.280000 35.936333 370.441652 
 127.280111 35.936333 372.638851 
 127.280111 35.936444 368.370045 
 127.280111 35.936556 364.112433 
 127.280222 35.936556 366.210817 
 127.280222 35.936667 361.996504 
 127.280222 35.936778 357.800122 
 127.280333 35.936778 359.822914 
 127.280333 35.936889 355.684297 
 127.280333 35.937000 351.570142 
 127.280444 35.937111 349.496572 
 127.280444 35.937222 345.491660 
 127.280444 35.937333 341.519816 
 127.280556 35.937333 343.507794 
 127.280556 35.937444 339.623899 
 127.280556 35.937556 335.778910 
 127.280667 35.937556 337.773368 
 127.280667 35.937667 334.028102 
 127.280667 35.937778 330.327198 
 127.280778 35.937778 332.344905 
 127.280778 35.937889 328.748198 
 127.280778 35.938000 325.213141 
 127.280889 35.938000 327.274836 
 127.280889 35.938111 323.847626 
 127.280889 35.938222 320.486027 
 127.281000 35.938333 319.358443 
 127.281000 35.938444 316.182438 
 127.281000 35.938556 313.065989 
 127.281111 35.938556 315.319254 
 127.281111 35.938667 312.334109 
 127.281111 35.938778 309.421991 
 127.281222 35.938778 311.755128 
 127.281222 35.938889 308.974532 
 127.281222 35.939000 306.269012 
 127.281333 35.939000 308.691108 
 127.281333 35.939111 306.121407 
 127.281333 35.939222 303.628226 
 127.281444 35.939222 306.137799 
 127.281444 35.939333 303.783165 
 127.281444 35.939444 301.505881 
 127.281556 35.939444 304.106061 
 127.281556 35.939556 301.968694 
 127.281556 35.939667 299.905417 
 127.281556 35.939778 297.920033 
 127.281667 35.939778 300.671640 
 127.281667 35.939889 298.825649 
 127.281667 35.940000 297.056980 
 127.281778 35.940000 299.886824 
 127.281778 35.940111 298.255626 
 127.281778 35.940222 296.700599 
 127.281889 35.940222 299.593648 
 127.281889 35.940333 298.172685 
 127.281889 35.940445 296.823932 
 127.282000 35.940445 299.771526 
 127.282000 35.940556 298.556619 
 127.282000 35.940667 297.409878 
 127.282111 35.940667 300.391504 
 127.282111 35.940778 299.371964 
 127.282111 35.940889 298.418525 
 127.282111 35.941000 297.533949 
 127.282222 35.941000 300.586890 
 127.282222 35.941111 299.816513 
 127.282222 35.941222 299.110500 
 127.282333 35.941222 302.156356 
 127.282333 35.941333 301.558361 
 127.282333 35.941445 301.020189 
 127.282444 35.941445 304.034318 
 127.282444 35.941556 303.594240 
 127.282444 35.941667 303.210420 
 127.282556 35.941667 306.174014 
 127.282556 35.941778 305.877681 
 127.282556 35.941889 305.633681 
 127.282667 35.941889 308.517613 
 127.282667 35.942000 308.349831 
 127.282667 35.942111 308.230148 
 127.282667 35.942222 308.157704 
 127.282778 35.942222 310.958591 
 127.282778 35.942333 310.947084 
 127.282778 35.942444 310.977988 
 127.282889 35.942444 313.641742 
 127.282889 35.942556 313.721425 
 127.282889 35.942667 313.838750 
 127.283000 35.942667 316.344184 
 127.283000 35.942778 316.497990 
 127.283000 35.942889 316.684527 
 127.283111 35.942889 319.002895 
 127.283111 35.943000 319.213986 
 127.283111 35.943111 319.452046 
 127.283222 35.943111 321.563007 
 127.283222 35.943222 321.813874 
 127.283222 35.943333 322.086561 
 127.283333 35.943333 323.964045 
 127.283333 35.943444 324.237719 
 127.283333 35.943555 324.528149 
 127.283333 35.943667 324.834908 
 127.283444 35.943667 326.433722 
 127.283444 35.943778 326.725445 
 127.283444 35.943889 327.028590 
 127.283556 35.943889 328.347459 
 127.283556 35.944000 328.625184 
 127.283556 35.944111 328.908602 
 127.283667 35.944111 329.932594 
 127.283667 35.944222 330.180756 
 127.283667 35.944333 330.430144 
 127.283778 35.944333 331.143016 
 127.283778 35.944444 331.347568 
 127.283778 35.944555 331.549161 
 127.283889 35.944555 331.939927 
 127.283889 35.944667 332.087837 
 127.283889 35.944778 332.229154 
 127.283889 35.944889 332.362491 
 127.284000 35.944889 332.367088 
 127.284000 35.945000 332.436361 
 127.284000 35.945111 332.494231 
 127.284111 35.945111 332.156915 
 127.284111 35.945222 332.143973 
 127.284111 35.945333 332.116588 
 127.284222 35.945333 331.434912 
 127.284222 35.945444 331.331091 
 127.284222 35.945556 331.209975 
 127.284333 35.945556 330.182776 
 127.284333 35.945667 329.981133 
 127.284333 35.945778 329.759485 
 127.284444 35.945778 328.391484 
 127.284444 35.945889 328.086221 
 127.284444 35.946000 327.758827 
 127.284556 35.946000 326.053848 
 127.284556 35.946111 325.640789 
 127.284556 35.946222 325.203903 
 127.284556 35.946333 324.744224 
 127.284667 35.946333 322.650110 
 127.284667 35.946444 322.101665 
 127.284667 35.946556 321.528680 
 127.284778 35.946556 319.118420 
 127.284778 35.946667 318.458930 
 127.284778 35.946778 317.773295 
 127.284889 35.946778 315.065706 
 127.284889 35.946889 314.295283 
 127.284889 35.947000 313.498477 
 127.285000 35.947000 310.506699 
 127.285000 35.947111 309.627774 
 127.285000 35.947222 308.722666 
 127.285111 35.947222 305.470997 
 127.285111 35.947333 304.485814 
 127.285111 35.947444 303.478499 
 127.285222 35.947444 299.983479 
 127.285222 35.947556 298.898810 
 127.285222 35.947667 297.793388 
 127.285222 35.947778 296.663735 
 127.285333 35.947778 292.906318 
 127.285333 35.947889 291.709758 
 127.285333 35.948000 290.490515 
 127.285444 35.948000 286.542088 
 127.285444 35.948111 285.260223 
 127.285444 35.948222 283.962028 
 127.285556 35.948222 279.855222 
 127.285556 35.948333 278.499315 
 127.285556 35.948444 277.129582 
 127.285667 35.948444 272.885280 
 127.285667 35.948556 271.465390 
 127.285667 35.948667 270.034455 
 127.285778 35.948667 265.687167 
 127.285778 35.948778 264.214216 
 127.285778 35.948889 262.733246 
 127.285778 35.949000 261.240015 
 127.285889 35.949000 256.789845 
 127.285889 35.949111 255.267994 
 127.285889 35.949222 253.742301 
 127.286000 35.949222 249.251219 
 127.286000 35.949333 247.703394 
 127.286000 35.949444 246.155196 
 127.286111 35.949444 241.643964 
 127.286111 35.949556 240.082879 
 127.286111 35.949667 238.525022 
 127.286222 35.949667 234.027817 
 127.286222 35.949778 232.466462 
 127.286222 35.949889 230.909355 
 127.286333 35.949889 226.445319 
 127.286333 35.950000 224.899472 
 127.286333 35.950111 223.358991 
 127.286444 35.950111 218.960104 
 127.286444 35.950222 217.440171 
 127.286444 35.950333 215.929475 
 127.286444 35.950444 214.434354 
 127.286556 35.950444 210.131390 
 127.286556 35.950556 208.663504 
 127.286556 35.950667 207.214964 
 127.286667 35.950667 203.027601 
 127.286667 35.950778 201.615265 
 127.286667 35.950889 200.223620 
 127.286778 35.950889 196.165201 
 127.286778 35.951000 194.823146 
 127.286778 35.951111 193.503217 
 127.286889 35.951111 189.597928 
 127.286889 35.951222 188.335586 
 127.286889 35.951333 187.099181 
 127.287000 35.951333 183.356654 
 127.287000 35.951444 182.185394 
 127.287000 35.951556 181.043784 
 127.287111 35.951556 177.483423 
 127.287111 35.951667 176.412115 
 127.287111 35.951778 175.377672 
 127.287111 35.951889 174.377573 
 127.287222 35.951889 171.045858 
 127.287222 35.952000 170.126466 
 127.287222 35.952111 169.244823 
 127.287333 35.952111 166.117986 
 127.287333 35.952222 165.322675 
 127.287333 35.952333 164.568339 
 127.287444 35.952333 161.647699 
 127.287444 35.952445 160.983632 
 127.287444 35.952556 160.365780 
 127.287556 35.952556 157.659845 
 127.287556 35.952667 157.135697 
 127.287556 35.952778 156.660101 
 127.287667 35.952778 154.166323 
 127.287667 35.952889 153.788616 
 127.287667 35.953000 153.461553 
 127.287778 35.953000 151.181639 
 127.287778 35.953111 150.955948 
 127.287778 35.953222 150.782737 
 127.287778 35.953333 150.662034 
 127.287889 35.953333 148.646691 
 127.287889 35.953445 148.631705 
 127.287889 35.953556 148.671219 
 127.288000 35.953556 146.861295 
 127.288000 35.953667 147.008302 
 127.288000 35.953778 147.211029 
 127.288111 35.953778 145.602761 
 127.288111 35.953889 145.914286 
 127.288111 35.954000 146.282476 
 127.288222 35.954000 144.865137 
 127.288222 35.954111 145.342888 
 127.288222 35.954222 145.878952 
 127.288333 35.954222 144.645231 
 127.288333 35.954333 145.288911 
 127.288333 35.954445 145.992658 
 127.288444 35.954445 144.929669 
 127.288444 35.954556 145.740048 
 127.288444 35.954667 146.611211 
 127.288444 35.954778 147.540209 
 127.288556 35.954778 146.684926 
 127.288556 35.954889 147.722361 
 127.288556 35.955000 148.817417 
 127.288667 35.955000 148.106673 
 127.288667 35.955111 149.308549 
 127.288667 35.955222 150.569796 
 127.288778 35.955222 149.991203 
 127.288778 35.955333 151.352610 
 127.288778 35.955444 152.775243 
 127.288889 35.955444 152.313822 
 127.288889 35.955555 153.833556 
 127.288889 35.955667 155.414107 
 127.289000 35.955667 155.056394 
 127.289000 35.955778 156.730549 
 127.289000 35.955889 158.464870 
 127.289111 35.955889 158.196086 
 127.289111 35.956000 160.023429 
 127.289111 35.956111 161.903672 
 127.289111 35.956222 163.842728 
 127.289222 35.956222 163.682784 
 127.289222 35.956333 165.706653 
 127.289222 35.956444 167.788126 
 127.289333 35.956444 167.686850 
 127.289333 35.956555 169.848696 
 127.289333 35.956667 172.066718 
 127.289444 35.956667 172.011043 
 127.289444 35.956778 174.308728 
 127.289444 35.956889 176.652970 
 127.289556 35.956889 176.630238 
 127.289556 35.957000 179.053514 
 127.289556 35.957111 181.521083 
 127.289667 35.957111 181.519562 
 127.289667 35.957222 184.061560 
 127.289667 35.957333 186.645420 
 127.289778 35.957444 189.307814 
 127.289778 35.957555 192.000667 
 127.289778 35.957667 194.740967 
 127.289889 35.957667 194.767647 
 127.289889 35.957778 197.566745 
 127.289889 35.957889 200.401142 
 127.290000 35.957889 200.417016 
 127.290000 35.958000 203.309879 
 127.290000 35.958111 206.235102 
 127.290111 35.958111 206.232556 
 127.290111 35.958222 209.211151 
 127.290111 35.958333 212.219042 
 127.290222 35.958333 212.191648 
 127.290222 35.958444 215.247787 
 127.290222 35.958556 218.335376 
 127.290333 35.958556 218.277957 
 127.290333 35.958667 221.397940 
 127.290333 35.958778 224.551544 
 127.290444 35.958889 227.640536 
 127.290444 35.959000 230.851570 
 127.290444 35.959111 234.080522 
 127.290556 35.959111 233.955673 
 127.290556 35.959222 237.215440 
 127.290556 35.959333 240.495269 
 127.290667 35.959333 240.329693 
 127.290667 35.959444 243.623760 
 127.290667 35.959556 246.940019 
 127.290778 35.959556 246.733413 
 127.290778 35.959667 250.058522 
 127.290778 35.959778 253.402276 
 127.290889 35.959778 253.154780 
 127.290889 35.959889 256.502030 
 127.290889 35.960000 259.864291 
 127.291000 35.960000 259.577698 
 127.291000 35.960111 262.938140 
 127.291000 35.960222 266.309884 
 127.291111 35.960333 269.356445 
 127.291111 35.960444 272.722817 
 127.291111 35.960556 276.095001 
 127.291222 35.960556 275.730809 
 127.291222 35.960667 279.088539 
 127.291222 35.960778 282.448225 
 127.291333 35.960778 282.052037 
 127.291333 35.960889 285.392047 
 127.291333 35.961000 288.730113 
 127.291444 35.961000 288.306849 
 127.291444 35.961111 291.625766 
 127.291444 35.961222 294.927421 
 127.291556 35.961222 294.481157 
 127.291556 35.961333 297.764152 
 127.291556 35.961444 301.026062 
 127.291667 35.961444 300.562557 
 127.291667 35.961556 303.800581 
 127.291667 35.961667 307.013720 
 127.291778 35.961778 309.721546 
 127.291778 35.961889 312.876913 
 127.291778 35.962000 316.012773 
 127.291889 35.962000 315.515198 
 127.291889 35.962111 318.609169 
 127.291889 35.962222 321.669115 
 127.292000 35.962222 321.168306 
 127.292000 35.962333 324.186590 
 127.292000 35.962444 327.167217 
 127.292111 35.962444 326.669193 
 127.292111 35.962556 329.603031 
 127.292111 35.962667 332.495652 
 127.292222 35.962667 332.004651 
 127.292222 35.962778 334.845368 
 127.292222 35.962889 337.646175 
 127.292333 35.962889 337.167630 
 127.292333 35.963000 339.901974 
 127.292333 35.963111 342.597597 
 127.292444 35.963111 342.135091 
 127.292444 35.963222 344.759608 
 127.292444 35.963333 347.341763 
 127.292444 35.963444 349.871217 
 127.292556 35.963444 349.406376 
 127.292556 35.963556 351.867010 
 127.292556 35.963667 354.275975 
 127.292667 35.963667 353.832882 
 127.292667 35.963778 356.160077 
 127.292667 35.963889 358.436507 
 127.292778 35.963889 358.018541 
 127.292778 35.964000 360.209005 
 127.292778 35.964111 362.345471 
 127.292889 35.964111 361.953971 
 127.292889 35.964222 364.000383 
 127.292889 35.964333 365.989709 
 127.293000 35.964333 365.626593 
 127.293000 35.964444 367.521983 
 127.293000 35.964556 369.357363 
 127.293111 35.964667 370.763285 
 127.293111 35.964778 372.435288 
 127.293111 35.964889 374.043439 
 127.293222 35.964889 373.705547 
 127.293222 35.965000 375.211309 
 127.293222 35.965111 376.650748 
 127.293333 35.965111 376.339366 
 127.293333 35.965222 377.673263 
 127.293333 35.965333 378.938572 
 127.293444 35.965333 378.651622 
 127.293444 35.965445 379.810361 
 127.293444 35.965556 380.894608 
 127.293556 35.965556 380.630247 
 127.293556 35.965667 381.606908 
 127.293556 35.965778 382.507888 
 127.293667 35.965778 382.262732 
 127.293667 35.965889 383.053093 
 127.293667 35.966000 383.766841 
 127.293778 35.966111 384.138121 
 127.293778 35.966222 384.662126 
 127.293778 35.966333 385.108682 
 127.293889 35.966333 384.851003 
 127.293889 35.966445 385.181285 
 127.293889 35.966556 385.433837 
 127.294000 35.966556 385.182126 
 127.294000 35.966667 385.316555 
 127.294000 35.966778 385.373252 
 127.294111 35.966778 385.121991 
 127.294111 35.966889 385.059023 
 127.294111 35.967000 384.918605 
 127.294222 35.967000 384.662679 
 127.294222 35.967111 384.401513 
 127.294222 35.967222 384.062818 
 127.294333 35.967222 383.795921 
 127.294333 35.967333 383.337113 
 127.294333 35.967445 382.800573 
 127.294444 35.967445 382.517140 
 127.294444 35.967556 381.860929 
 127.294444 35.967667 381.127462 
 127.294444 35.967778 380.319727 
 127.294556 35.967778 379.968515 
 127.294556 35.967889 379.039711 
 127.294556 35.968000 378.036414 
 127.294667 35.968000 377.655933 
 127.294667 35.968111 376.536074 
 127.294667 35.968222 375.341382 
 127.294778 35.968222 374.925055 
 127.294778 35.968333 373.615723 
 127.294778 35.968444 372.233045 
 127.294889 35.968444 371.775616 
 127.294889 35.968555 370.280768 
 127.294889 35.968667 368.714359 
 127.295000 35.968667 368.209427 
 127.295000 35.968778 366.533733 
 127.295000 35.968889 364.788556 
 127.295111 35.968889 364.231562 
 127.295111 35.969000 362.377302 
 127.295111 35.969111 360.462406 
 127.295111 35.969222 358.481481 
 127.295222 35.969222 357.823895 
 127.295222 35.969333 355.742843 
 127.295222 35.969444 353.598516 
 127.295333 35.969444 352.880689 
 127.295333 35.969555 350.640814 
 127.295333 35.969667 348.340690 
 127.295444 35.969667 347.557888 
 127.295444 35.969778 345.163048 
 127.295444 35.969889 342.719568 
 127.295556 35.969889 341.870084 
 127.295556 35.970000 339.333012 
 127.295556 35.970111 336.751322 
 127.295667 35.970111 335.831625 
 127.295667 35.970222 333.161802 
 127.295667 35.970333 330.451590 
 127.295778 35.970333 329.461728 
 127.295778 35.970444 326.669378 
 127.295778 35.970556 323.836155 
 127.295778 35.970667 320.968780 
 127.295889 35.970667 319.874885 
 127.295889 35.970778 316.934369 
 127.295889 35.970889 313.964348 
 127.296000 35.970889 312.802834 
 127.296000 35.971000 309.766689 
 127.296000 35.971111 306.705834 
 127.296111 35.971111 305.476408 
 127.296111 35.971222 302.356808 
 127.296111 35.971333 299.217421 
 127.296222 35.971333 297.924484 
 127.296222 35.971444 294.734152 
 127.296222 35.971556 291.523530 
 127.296333 35.971556 290.168452 
 127.296333 35.971667 286.926096 
 127.296333 35.971778 283.662912 
 127.296444 35.971778 282.252236 
 127.296444 35.971889 278.965940 
 127.296444 35.972000 275.663850 
 127.296444 35.972111 272.359320 
 127.296556 35.972111 270.884298 
 127.296556 35.972222 267.557243 
 127.296556 35.972333 264.227241 
 127.296667 35.972333 262.712023 
 127.296667 35.972444 259.379945 
 127.296667 35.972556 256.044395 
 127.296778 35.972556 254.493828 
 127.296778 35.972667 251.165353 
 127.296778 35.972778 247.838623 
 127.296889 35.972778 246.263108 
 127.296889 35.972889 242.952676 
 127.296889 35.973000 239.649210 
 127.297000 35.973000 238.054950 
 127.297000 35.973111 234.777020 
 127.297000 35.973222 231.511252 
 127.297111 35.973222 229.910026 
 127.297111 35.973333 226.673442 
 127.297111 35.973444 223.465247 
 127.297111 35.973556 220.276311 
 127.297222 35.973556 218.689005 
 127.297222 35.973667 215.546905 
 127.297222 35.973778 212.429088 
 127.297333 35.973778 210.858948 
 127.297333 35.973889 207.796804 
 127.297333 35.974000 204.763853 
 127.297444 35.974000 203.218842 
 127.297444 35.974111 200.245115 
 127.297444 35.974222 197.315504 
 127.297556 35.974222 195.808574 
 127.297556 35.974333 192.941591 
 127.297556 35.974444 190.122948 
 127.297667 35.974444 188.662251 
 127.297667 35.974556 185.914608 
 127.297667 35.974667 183.219293 
 127.297778 35.974778 179.201087 
 127.297778 35.974889 176.636409 
 127.297778 35.975000 174.129137 
 127.297889 35.975000 172.831810 
 127.297889 35.975111 170.413382 
 127.297889 35.975222 168.055695 
 127.298000 35.975222 166.839859 
 127.298000 35.975333 164.577832 
 127.298000 35.975444 162.379570 
 127.298111 35.975444 161.251971 
 127.298111 35.975556 159.155675 
 127.298111 35.975667 157.125835 
 127.298222 35.975667 156.096088 
 127.298222 35.975778 154.173822 
 127.298222 35.975889 152.317228 
 127.298333 35.975889 151.390704 
 127.298333 35.976000 149.652865 
 127.298333 35.976111 147.979954 
 127.298333 35.976222 146.378538 
 127.298444 35.976222 145.613240 
 127.298444 35.976333 144.129832 
 127.298444 35.976444 142.719401 
 127.298556 35.976444 142.069205 
 127.298556 35.976556 140.780049 
 127.298556 35.976667 139.562938 
 127.298667 35.976667 139.031379 
 127.298667 35.976778 137.941927 
 127.298667 35.976889 136.923631 
 127.298778 35.976889 136.512321 
 127.298778 35.977000 135.622536 
 127.298778 35.977111 134.804908 
 127.298889 35.977111 134.513048 
 127.298889 35.977222 133.824005 
 127.298889 35.977333 133.207728 
 127.299000 35.977333 133.034018 
 127.299000 35.977445 132.544669 
 127.299000 35.977556 132.129860 
 127.299000 35.977667 131.788129 
 127.299111 35.977667 131.780631 
 127.299111 35.977778 131.564331 
 127.299111 35.977889 131.420802 
 127.299222 35.977889 131.521150 
 127.299222 35.978000 131.500195 
 127.299222 35.978111 131.551325 
 127.299333 35.978111 131.752426 
 127.299333 35.978222 131.922514 
 127.299333 35.978333 132.163625 
 127.299444 35.978333 132.456270 
 127.299444 35.978445 132.812513 
 127.299444 35.978556 133.237015 
 127.299556 35.978556 133.611156 
 127.299556 35.978667 134.146568 
 127.299556 35.978778 134.747862 
 127.299667 35.978889 135.897696 
 127.299667 35.979000 136.667716 
 127.299667 35.979111 137.502795 
 127.299778 35.979111 138.036345 
 127.299778 35.979222 138.967765 
 127.299778 35.979333 139.958447 
 127.299889 35.979333 140.528305 
 127.299889 35.979445 141.609813 
 127.299889 35.979556 142.747312 
 127.300000 35.979556 143.338108 
 127.300000 35.979667 144.559031 
 127.300000 35.979778 145.832471 
 127.300111 35.979778 146.426072 
 127.300111 35.979889 147.775019 
 127.300111 35.980000 149.172844 
 127.300222 35.980000 149.752190 
 127.300222 35.980111 151.217243 
 127.300222 35.980222 152.730041 
 127.300222 35.980333 154.286656 
 127.300333 35.980333 154.841834 
 127.300333 35.980444 156.454659 
 127.300333 35.980555 158.107399 
 127.300444 35.980555 158.605631 
 127.300444 35.980667 160.305736 
 127.300444 35.980778 162.041808 
 127.300556 35.980778 162.463341 
 127.300556 35.980889 164.237846 
 127.300556 35.981000 166.047501 
 127.300667 35.981000 166.374222 
 127.300667 35.981111 168.207128 
 127.300667 35.981222 170.074487 
 127.300778 35.981222 170.287624 
 127.300778 35.981333 172.169266 
 127.300778 35.981444 174.081673 
 127.300889 35.981444 174.164033 
 127.300889 35.981555 176.082010 
 127.300889 35.981667 178.027131 
 127.300889 35.981778 179.994833 
 127.301000 35.981778 179.907820 
 127.301000 35.981889 181.870465 
 127.301000 35.982000 183.855525 
 127.301111 35.982000 183.601436 
 127.301111 35.982111 185.573698 
 127.301111 35.982222 187.565043 
 127.301222 35.982222 187.130958 
 127.301222 35.982333 189.102395 
 127.301222 35.982444 191.089775 
 127.301333 35.982444 190.463519 
 127.301333 35.982555 192.424513 
 127.301333 35.982667 194.398534 
 127.301444 35.982667 193.571662 
 127.301444 35.982778 195.516983 
 127.301444 35.982889 197.465971 
 127.301444 35.983000 199.424320 
 127.301556 35.983000 198.348727 
 127.301556 35.983111 200.268814 
 127.301556 35.983222 202.195959 
 127.301667 35.983222 200.906483 
 127.301667 35.983333 202.791686 
 127.301667 35.983444 204.681956 
 127.301778 35.983444 203.175105 
 127.301778 35.983556 205.023832 
 127.301778 35.983667 206.869617 
 127.301889 35.983667 205.149060 
 127.301889 35.983778 206.954699 
 127.301889 35.983889 208.756239 
 127.302000 35.983889 206.823457 
 127.302000 35.984000 208.583962 
 127.302000 35.984111 210.339580 
 127.302111 35.984222 209.919517 
 127.302111 35.984333 211.629017 
 127.302111 35.984444 213.338631 
 127.302222 35.984444 210.968685 
 127.302222 35.984556 212.636091 
 127.302222 35.984667 214.297769 
 127.302333 35.984667 211.751557 
 127.302333 35.984778 213.376565 
 127.302333 35.984889 214.996235 
 127.302444 35.984889 212.286342 
 127.302444 35.985000 213.872906 
 127.302444 35.985111 215.454864 
 127.302556 35.985111 212.604878 
 127.302556 35.985222 214.158334 
 127.302556 35.985333 215.710902 
 127.302667 35.985333 212.738314 
 127.302667 35.985444 214.262583 
 127.302667 35.985556 215.789894 
 127.302667 35.985667 217.314986 
 127.302778 35.985667 214.229368 
 127.302778 35.985778 215.739460 
 127.302778 35.985889 217.249011 
 127.302889 35.985889 214.097431 
 127.302889 35.986000 215.599345 
 127.302889 35.986111 217.105218 
 127.303000 35.986111 213.921784 
 127.303000 35.986222 215.422917 
 127.303000 35.986333 216.932692 
 127.303111 35.986333 213.743318 
 127.303111 35.986444 215.256964 
 127.303111 35.986556 216.781545 
 127.303222 35.986556 213.623444 
 127.303222 35.986667 215.160939 
 127.303222 35.986778 216.711807 
 127.303222 35.986889 218.270943 
 127.303333 35.986889 215.186436 
 127.303333 35.987000 216.775495 
 127.303333 35.987111 218.378006 
 127.303444 35.987111 215.398976 
 127.303444 35.987222 217.035539 
 127.303444 35.987333 218.690869 
 127.303556 35.987333 215.846870 
 127.303556 35.987444 217.545839 
 127.303556 35.987556 219.266164 
 127.303667 35.987556 216.595675 
 127.303667 35.987667 218.369052 
 127.303667 35.987778 220.166319 
 127.303778 35.987778 217.698598 
 127.303778 35.987889 219.561338 
 127.303778 35.988000 221.443956 
 127.303889 35.988000 219.215280 
 127.303889 35.988111 221.175486 
 127.303889 35.988222 223.157502 
 127.303889 35.988333 225.168211 
 127.304000 35.988333 223.263620 
 127.304000 35.988444 225.355340 
 127.304000 35.988556 227.477750 
 127.304111 35.988556 225.876704 
 127.304111 35.988667 228.091294 
 127.304111 35.988778 230.330645 
 127.304222 35.988778 229.060585 
 127.304222 35.988889 231.402609 
 127.304222 35.989000 233.770370 
 127.304333 35.989000 232.853183 
 127.304333 35.989111 235.329663 
 127.304333 35.989222 237.832480 
 127.304444 35.989222 237.290491 
 127.304444 35.989333 239.906907 
 127.304444 35.989444 242.549849 
 127.304444 35.989556 245.227962 
 127.304556 35.989556 245.160227 
 127.304556 35.989667 247.951714 
 127.304556 35.989778 250.768844 
 127.304667 35.989778 251.109740 
 127.304667 35.989889 254.046960 
 127.304667 35.990000 257.008973 
 127.304778 35.990000 257.768458 
 127.304778 35.990111 260.851495 
 127.304778 35.990222 263.957984 
 127.304889 35.990222 265.140255 
 127.304889 35.990333 268.367167 
 127.304889 35.990445 271.621302 
 127.305000 35.990445 273.229584 
 127.305000 35.990556 276.590856 
 127.305000 35.990667 279.982996 
 127.305000 35.990778 283.393192 
 127.305111 35.990778 285.506866 
 127.305111 35.990889 289.030622 
 127.305111 35.991000 292.569436 
 127.305222 35.991000 295.096913 
 127.305222 35.991111 298.744036 
 127.305222 35.991222 302.402721 
 127.305333 35.991222 305.327437 
 127.305333 35.991333 309.087580 
 127.305333 35.991445 312.861798 
 127.305444 35.991445 316.171620 
 127.305444 35.991556 320.026008 
 127.305444 35.991667 323.896807 
 127.305556 35.991667 327.565465 
 127.305556 35.991778 331.506441 
 127.305556 35.991889 335.459228 
 127.305667 35.991889 339.467566 
 127.305667 35.992000 343.479369 
 127.305667 35.992111 347.497919 
 127.305667 35.992222 351.514367 
 127.305778 35.992222 355.883151 
 127.305778 35.992333 359.942528 
 127.305778 35.992445 364.001111 
 127.305889 35.992445 368.641644 
 127.305889 35.992556 372.729452 
 127.305889 35.992667 376.810485 
 127.306000 35.992667 381.679628 
 127.306000 35.992778 385.775175 
 127.306000 35.992889 389.857632 
 127.306111 35.992889 394.924418 
 127.306111 35.993000 399.012942 
 127.306111 35.993111 403.067766 
 127.306222 35.993111 408.283373 
 127.306222 35.993222 412.335050 
 127.306222 35.993333 416.346330 
 127.306222 35.993444 420.328760 
 127.306333 35.993444 425.667491 
 127.306333 35.993555 429.611643 
 127.306333 35.993667 433.519907 
 127.306444 35.993667 438.910147 
 127.306444 35.993778 442.763129 
 127.306444 35.993889 446.573090 
 127.306556 35.993889 451.978009 
 127.306556 35.994000 455.721955 
 127.306556 35.994111 459.402941 
 127.306667 35.994111 464.768501 
 127.306667 35.994222 468.372579 
 127.306667 35.994333 471.907054 
 127.306778 35.994333 477.196259 
 127.306778 35.994444 480.636470 
 127.306778 35.994555 484.000612 
 127.306778 35.994667 487.298171 
 127.306889 35.994667 492.413426 
 127.306889 35.994778 495.589446 
 127.306889 35.994889 498.681305 
 127.307000 35.994889 503.622160 
 127.307000 35.995000 506.581874 
 127.307000 35.995111 509.451626 
 127.307111 35.995111 514.169074 
 127.307111 35.995222 516.891179 
 127.307111 35.995333 519.517908 
 127.307222 35.995333 523.980378 
 127.307222 35.995444 526.444771 
 127.307222 35.995556 528.812796 
 127.307333 35.995556 532.977005 
 127.307333 35.995667 535.161365 
 127.307333 35.995778 537.248233 
 127.307444 35.995778 541.087886 
 127.307444 35.995889 542.979677 
 127.307444 35.996000 544.769018 
 127.307444 35.996111 546.448517 
 127.307556 35.996111 549.833208 
 127.307556 35.996222 551.310743 
 127.307556 35.996333 552.675270 
 127.307667 35.996333 555.674920 
 127.307667 35.996444 556.828338 
 127.307667 35.996556 557.867900 
 127.307778 35.996556 560.457639 
 127.307778 35.996667 561.275534 
 127.307778 35.996778 561.978625 
 127.307889 35.996778 564.147333 
 127.307889 35.996889 564.624111 
 127.307889 35.997000 564.983719 
 127.308000 35.997000 566.717502 
 127.308000 35.997111 566.848126 
 127.308000 35.997222 566.859896 
 127.308000 35.997333 566.752339 
 127.308111 35.997333 567.937298 
 127.308111 35.997444 567.599734 
 127.308111 35.997556 567.142205 
 127.308222 35.997556 567.887673 
 127.308222 35.997667 567.201680 
 127.308222 35.997778 566.395677 
 127.308333 35.997778 566.708767 
 127.308333 35.997889 565.677544 
 127.308333 35.998000 564.526982 
 127.308444 35.998000 564.418264 
 127.308444 35.998111 563.047746 
 127.308444 35.998222 561.559272 
 127.308556 35.998222 561.044680 
 127.308556 35.998333 559.340131 
 127.308556 35.998444 557.525756 
 127.308556 35.998556 555.596331 
 127.308667 35.998556 554.601861 
 127.308667 35.998667 552.470675 
 127.308667 35.998778 550.227401 
 127.308778 35.998778 548.879400 
 127.308778 35.998889 546.445109 
 127.308778 35.999000 543.902336 
 127.308889 35.999000 542.233966 
 127.308889 35.999111 539.507824 
 127.308889 35.999222 536.686949 
 127.309000 35.999222 534.730709 
 127.309000 35.999333 531.734942 
 127.309000 35.999444 528.650130 
 127.309111 35.999444 526.447842 
 127.309111 35.999556 523.202350 
 127.309111 35.999667 519.873950 
 127.309111 35.999778 516.453145 
 127.309222 35.999778 513.990434 
 127.309222 35.999889 510.434100 
 127.309222 36.000000 506.803611 
 127.309333 36.000000 504.192576 
 127.309333 36.000111 500.437435 
 127.309333 36.000222 496.615086 
 127.309444 36.000222 493.899291 
 127.309444 36.000333 489.969730 
 127.309444 36.000444 485.980151 
 127.309556 36.000444 483.211000 
 127.309556 36.000556 479.132330 
 127.309556 36.000667 475.001004 
 127.309667 36.000667 472.231185 
 127.309667 36.000778 468.029348 
 127.309667 36.000889 463.774964 
 127.309667 36.001000 459.477910 
 127.309778 36.001000 456.759900 
 127.309778 36.001111 452.415991 
 127.309778 36.001222 448.036919 
 127.309889 36.001222 445.432101 
 127.309889 36.001333 441.025063 
 127.309889 36.001444 436.590307 
 127.310000 36.001444 434.145101 
 127.310000 36.001556 429.701123 
 127.310000 36.001667 425.229036 
 127.310111 36.001667 422.996627 
 127.310111 36.001778 418.548993 
 127.310111 36.001889 414.072731 
 127.310222 36.001889 412.097161 
 127.310222 36.002000 407.663182 
 127.310222 36.002111 403.207488 
 127.310222 36.002222 398.747739 
 127.310333 36.002222 397.140693 
 127.310333 36.002333 392.729170 
 127.310333 36.002444 388.320031 
 127.310444 36.002444 387.067846 
 127.310444 36.002556 382.722910 
 127.310444 36.002667 378.378937 
 127.310556 36.002667 377.522371 
 127.310556 36.002778 373.272142 
 127.310556 36.002889 369.021311 
 127.310667 36.002889 368.593866 
 127.310667 36.003000 364.450081 
 127.310667 36.003111 360.311160 
 127.310778 36.003111 360.344370 
 127.310778 36.003222 356.324220 
 127.310778 36.003333 352.313920 
 127.310778 36.003445 348.322179 
 127.310889 36.003445 348.946461 
 127.310889 36.003556 345.086248 
 127.310889 36.003667 341.242008 
 127.311000 36.003667 342.379167 
 127.311000 36.003778 338.674565 
 127.311000 36.003889 334.989691 
 127.311111 36.003889 336.657303 
 127.311111 36.004000 333.118633 
 127.311111 36.004111 329.602850 
 127.311222 36.004111 331.808981 
 127.311222 36.004222 328.438269 
 127.311222 36.004333 325.104520 
 127.311333 36.004333 327.858117 
 127.311333 36.004445 324.667011 
 127.311333 36.004556 321.514167 
 127.311333 36.004667 318.389635 
 127.311444 36.004667 321.802642 
 127.311444 36.004778 318.833039 
 127.311444 36.004889 315.892861 
 127.311556 36.004889 319.848454 
 127.311556 36.005000 317.062208 
 127.311556 36.005111 314.305868 
 127.311667 36.005111 318.786642 
 127.311667 36.005222 316.176877 
 127.311667 36.005333 313.605785 
 127.311778 36.005333 318.602594 
 127.311778 36.005444 316.169528 
 127.311778 36.005555 313.773784 
 127.311889 36.005555 319.257880 
 127.311889 36.005667 316.994597 
 127.311889 36.005778 314.766729 
 127.311889 36.005889 312.566636 
 127.312000 36.005889 318.618945 
 127.312000 36.006000 316.546060 
 127.312000 36.006111 314.505997 
 127.312111 36.006111 320.983341 
 127.312111 36.006222 319.057818 
 127.312111 36.006333 317.162086 
 127.312222 36.006333 324.040347 
 127.312222 36.006444 322.249165 
 127.312222 36.006555 320.484322 
 127.312333 36.006555 327.715107 
 127.312333 36.006667 326.043558 
 127.312333 36.006778 324.391714 
 127.312444 36.006778 331.945896 
 127.312444 36.006889 330.380748 
 127.312444 36.007000 328.828641 
 127.312444 36.007111 327.294328 
 127.312556 36.007111 335.172441 
 127.312556 36.007222 333.702607 
 127.312556 36.007333 332.246134 
 127.312667 36.007333 340.350418 
 127.312667 36.007444 338.944623 
 127.312667 36.007555 337.547581 
 127.312778 36.007555 345.818589 
 127.312778 36.007667 344.457902 
 127.312778 36.007778 343.098921 
 127.312889 36.007778 351.502024 
 127.312889 36.007889 350.169479 
 127.312889 36.008000 348.831618 
 127.313000 36.008000 357.305651 
 127.313000 36.008111 355.979493 
 127.313000 36.008222 354.643292 
 127.313000 36.008333 353.300884 
 127.313111 36.008333 361.814691 
 127.313111 36.008444 360.460867 
 127.313111 36.008556 359.093839 
 127.313222 36.008556 367.574048 
 127.313222 36.008667 366.186075 
 127.313222 36.008778 364.777973 
 127.313333 36.008778 373.192309 
 127.313333 36.008889 371.749612 
 127.313333 36.009000 370.282323 
 127.313444 36.009000 378.573845 
 127.313444 36.009111 377.059019 
 127.313444 36.009222 375.515350 
 127.313556 36.009222 383.655495 
 127.313556 36.009333 382.052136 
 127.313556 36.009444 380.415945 
 127.313556 36.009556 378.749186 
 127.313667 36.009556 386.643086 
 127.313667 36.009667 384.902531 
 127.313667 36.009778 383.125042 
 127.313778 36.009778 390.785563 
 127.313778 36.009889 388.924459 
 127.313778 36.010000 387.023211 
 127.313889 36.010000 394.406641 
 127.313889 36.010111 392.413267 
 127.313889 36.010222 390.376953 
 127.314000 36.010222 397.466875 
 127.314000 36.010333 395.327447 
 127.314000 36.010444 393.150151 
 127.314111 36.010444 399.911459 
 127.314111 36.010556 397.621294 
 127.314111 36.010667 395.291913 
 127.314111 36.010778 392.915473 
 127.314222 36.010778 399.268164 
 127.314222 36.010889 396.780911 
 127.314222 36.011000 394.245373 
 127.314333 36.011000 400.232512 
 127.314333 36.011111 397.579128 
 127.314333 36.011222 394.885955 
 127.314444 36.011222 400.506838 
 127.314444 36.011333 397.689919 
 127.314444 36.011444 394.833609 
 127.314556 36.011444 400.073811 
 127.314556 36.011556 397.093820 
 127.314556 36.011667 394.075376 
 127.314667 36.011667 398.941952 
 127.314667 36.011778 395.801298 
 127.314667 36.011889 392.623656 
 127.314667 36.012000 389.399042 
 127.314778 36.012000 393.815436 
 127.314778 36.012111 390.477894 
 127.314778 36.012222 387.106510 
 127.314889 36.012222 391.162251 
 127.314889 36.012333 387.677231 
 127.314889 36.012444 384.160978 
 127.315000 36.012444 387.865016 
 127.315000 36.012556 384.241368 
 127.315000 36.012667 380.589556 
 127.315111 36.012667 383.955686 
 127.315111 36.012778 380.204075 
 127.315111 36.012889 376.421273 
 127.315222 36.012889 379.474627 
 127.315222 36.013000 375.613894 
 127.315222 36.013111 371.719050 
 127.315333 36.013111 374.478176 
 127.315333 36.013222 370.515694 
 127.315333 36.013333 366.523001 
 127.315333 36.013444 362.515533 
 127.315444 36.013444 364.969290 
 127.315444 36.013556 360.894179 
 127.315444 36.013667 356.801873 
 127.315556 36.013667 359.024241 
 127.315556 36.013778 354.890456 
 127.315556 36.013889 350.737143 
 127.315667 36.013889 352.763208 
 127.315667 36.014000 348.581282 
 127.315667 36.014111 344.384740 
 127.315778 36.014111 346.244576 
 127.315778 36.014222 342.032843 
 127.315778 36.014333 337.811612 
 127.315889 36.014333 339.542746 
 127.315889 36.014444 335.320088 
 127.315889 36.014556 331.093205 
 127.315889 36.014667 326.871370 
 127.316000 36.014667 328.506853 
 127.316000 36.014778 324.300939 
 127.316000 36.014889 320.098198 
 127.316111 36.014889 321.685065 
 127.316111 36.015000 317.512314 
 127.316111 36.015111 313.348162 
 127.316222 36.015111 314.919898 
 127.316222 36.015222 310.799675 
 127.316222 36.015333 306.693455 
 127.316333 36.015333 308.288069 
 127.316333 36.015445 304.232537 
 127.316333 36.015556 300.210235 
 127.316444 36.015556 301.859870 
 127.316444 36.015667 297.894731 
 127.316444 36.015778 293.967709 
 127.316444 36.015889 290.067142 
 127.316556 36.015889 291.851639 
 127.316556 36.016000 288.037679 
 127.316556 36.016111 284.255142 
 127.316667 36.016111 286.167183 
 127.316667 36.016222 282.483112 
 127.316667 36.016333 278.835197 
 127.316778 36.016333 280.907102 
 127.316778 36.016445 277.362727 
 127.316778 36.016556 273.871058 
 127.316889 36.016556 276.126519 
 127.316889 36.016667 272.742734 
 127.316889 36.016778 269.415223 
 127.317000 36.016778 271.882102 
 127.317000 36.016889 268.672254 
 127.317000 36.017000 265.521843 
 127.317000 36.017111 262.421354 
 127.317111 36.017111 265.193559 
 127.317111 36.017222 262.226538 
 127.317111 36.017333 259.322779 
 127.317222 36.017333 262.350888 
 127.317222 36.017445 259.582510 
 127.317222 36.017556 256.879519 
 127.317333 36.017556 260.173100 
 127.317333 36.017667 257.611435 
 127.317333 36.017778 255.116797 
 127.317444 36.017778 258.691925 
 127.317444 36.017889 256.343427 
 127.317444 36.018000 254.059228 
 127.317556 36.018000 257.917856 
 127.317556 36.018111 255.790765 
 127.317556 36.018222 253.725265 
 127.317667 36.018333 255.970223 
 127.317667 36.018444 254.125749 
 127.317667 36.018555 252.350483 
 127.317778 36.018555 256.878812 
 127.317778 36.018667 255.255712 
 127.317778 36.018778 253.701275 
 127.317889 36.018778 258.519851 
 127.317889 36.018889 257.116784 
 127.317889 36.019000 255.779090 
 127.318000 36.019000 260.873146 
 127.318000 36.019111 259.688930 
 127.318000 36.019222 258.566825 
 127.318111 36.019222 263.933550 
 127.318111 36.019333 262.960835 
 127.318111 36.019444 262.048941 
 127.318222 36.019444 267.666167 
 127.318222 36.019555 266.898253 
 127.318222 36.019667 266.189392 
 127.318222 36.019778 265.540542 
 127.318333 36.019778 271.477004 
 127.318333 36.019889 270.963468 
 127.318333 36.020000 270.506302 
 127.318444 36.020000 276.652237 
 127.318444 36.020111 276.322519 
 127.318444 36.020222 276.046372 
 127.318556 36.020222 282.388964 
 127.318556 36.020333 282.231560 
 127.318556 36.020444 282.124518 
 127.318667 36.020444 288.629254 
 127.318667 36.020555 288.631290 
 127.318667 36.020667 288.680109 
 127.318778 36.020667 295.330750 
 127.318778 36.020778 295.478608 
 127.318778 36.020889 295.668746 
 127.318778 36.021000 295.900765 
 127.318889 36.021000 302.705527 
 127.318889 36.021111 303.021758 
 127.318889 36.021222 303.375550 
 127.319000 36.021222 310.262424 
 127.319000 36.021333 310.688744 
 127.319000 36.021444 311.148043 
 127.319111 36.021444 318.075926 
 127.319111 36.021556 318.596525 
 127.319111 36.021667 319.143468 
 127.319222 36.021667 326.092397 
 127.319222 36.021778 326.689300 
 127.319222 36.021889 327.307319 
 127.319333 36.021889 334.235431 
 127.319333 36.022000 334.891037 
 127.319333 36.022111 335.562459 
 127.319444 36.022222 343.146327 
 127.319444 36.022333 343.854577 
 127.319444 36.022444 344.571881 
 127.319556 36.022444 351.378419 
 127.319556 36.022556 352.104487 
 127.319556 36.022667 352.834287 
 127.319667 36.022667 359.532899 
 127.319667 36.022778 360.259103 
 127.319667 36.022889 360.983778 
 127.319778 36.022889 367.535694 
 127.319778 36.023000 368.244661 
 127.319778 36.023111 368.946946 
 127.319889 36.023111 375.335558 
 127.319889 36.023222 376.010340 
 127.319889 36.023333 376.674556 
 127.320000 36.023333 382.864602 
 127.320000 36.023444 383.487770 
 127.320000 36.023556 384.096525 
 127.320000 36.023667 384.687453 
 127.320111 36.023667 390.631483 
 127.320111 36.023778 391.169280 
 127.320111 36.023889 391.684688 
 127.320222 36.023889 397.380597 
 127.320222 36.024000 397.832842 
 127.320222 36.024111 398.259102 
 127.320333 36.024111 403.697241 
 127.320333 36.024222 404.049605 
 127.320333 36.024333 404.372409 
 127.320444 36.024333 409.532247 
 127.320444 36.024444 409.772930 
 127.320444 36.024556 409.979943 
 127.320556 36.024556 414.844235 
 127.320556 36.024667 414.961810 
 127.320556 36.024778 415.041896 
 127.320556 36.024889 415.083327 
 127.320667 36.024889 419.591503 
 127.320667 36.025000 419.534726 
 127.320667 36.025111 419.436055 
 127.320778 36.025111 423.627595 
 127.320778 36.025222 423.425508 
 127.320778 36.025333 423.178459 
 127.320889 36.025333 427.055074 
 127.320889 36.025444 426.700280 
 127.320889 36.025556 426.297815 
 127.321000 36.025556 429.851269 
 127.321000 36.025667 429.337816 
 127.321000 36.025778 428.774357 
 127.321111 36.025778 432.010724 
 127.321111 36.025889 431.332715 
 127.321111 36.026000 430.605164 
 127.321222 36.026000 433.522457 
 127.321222 36.026111 432.677597 
 127.321222 36.026222 431.782207 
 127.321222 36.026333 430.832994 
 127.321333 36.026333 433.376913 
 127.321333 36.026444 432.312129 
 127.321333 36.026556 431.192479 
 127.321444 36.026556 433.432452 
 127.321444 36.026667 432.195998 
 127.321444 36.026778 430.908374 
 127.321556 36.026778 432.858607 
 127.321556 36.026889 431.453477 
 127.321556 36.027000 429.997507 
 127.321667 36.027000 431.667648 
 127.321667 36.027111 430.096335 
 127.321667 36.027222 428.474897 
 127.321778 36.027222 429.882116 
 127.321778 36.027333 428.148253 
 127.321778 36.027444 426.365351 
 127.321889 36.027444 427.523609 
 127.321889 36.027556 425.632095 
 127.321889 36.027667 423.689606 
 127.321889 36.027778 421.700191 
 127.322000 36.027778 422.578456 
 127.322000 36.027889 420.485776 
 127.322000 36.028000 418.348071 
 127.322111 36.028000 419.017959 
 127.322111 36.028111 416.782478 
 127.322111 36.028222 414.504195 
 127.322222 36.028222 414.986773 
 127.322222 36.028333 412.616758 
 127.322222 36.028445 410.202282 
 127.322333 36.028445 410.517387 
 127.322333 36.028556 408.026294 
 127.322333 36.028667 405.489087 
 127.322444 36.028667 405.658380 
 127.322444 36.028778 403.052089 
 127.322444 36.028889 400.402359 
 127.322556 36.028889 400.446827 
 127.322556 36.029000 397.735999 
 127.322556 36.029111 394.984681 
 127.322556 36.029222 392.198763 
 127.322667 36.029222 392.116604 
 127.322667 36.029333 389.280032 
 127.322667 36.029445 386.407459 
 127.322778 36.029445 386.247720 
 127.322778 36.029556 383.333189 
 127.322778 36.029667 380.386176 
 127.322889 36.029667 380.169010 
 127.322889 36.029778 377.188887 
 127.322889 36.029889 374.180006 
 127.323000 36.029889 373.925365 
 127.323000 36.030000 370.892356 
 127.323000 36.030111 367.834494 
 127.323111 36.030111 367.560631 
 127.323111 36.030222 364.482356 
 127.323111 36.030333 361.393896 
 127.323222 36.030333 361.118725 
 127.323222 36.030444 358.013518 
 127.323222 36.030555 354.902407 
 127.323222 36.030667 351.776358 
 127.323333 36.030667 351.522692 
 127.323333 36.030778 348.402158 
 127.323333 36.030889 345.271042 
 127.323444 36.030889 345.051344 
 127.323444 36.031000 341.929202 
 127.323444 36.031111 338.811643 
 127.323556 36.031111 338.638453 
 127.323556 36.031222 335.533188 
 127.323556 36.031333 332.436936 
 127.323667 36.031333 332.321664 
 127.323667 36.031444 329.246179 
 127.323667 36.031555 326.184129 
 127.323778 36.031555 326.135916 
 127.323778 36.031667 323.102899 
 127.323778 36.031778 320.082534 
 127.323889 36.031778 320.108927 
 127.323889 36.031889 317.135853 
 127.323889 36.032000 314.174753 
 127.323889 36.032111 311.237593 
 127.324000 36.032111 311.374897 
 127.324000 36.032222 308.485043 
 127.324000 36.032333 305.623395 
 127.324111 36.032333 305.846922 
 127.324111 36.032444 303.039814 
 127.324111 36.032555 300.265087 
 127.324222 36.032555 300.576431 
 127.324222 36.032667 297.863147 
 127.324222 36.032778 295.181736 
 127.324333 36.032778 295.579764 
 127.324333 36.032889 292.975325 
 127.324333 36.033000 290.402382 
 127.324444 36.033000 290.885024 
 127.324444 36.033111 288.394739 
 127.324444 36.033222 285.940161 
 127.324556 36.033333 284.135396 
 127.324556 36.033444 281.808423 
 127.324556 36.033556 279.526976 
 127.324667 36.033556 280.206139 
 127.324667 36.033667 278.019261 
 127.324667 36.033778 275.877785 
 127.324778 36.033778 276.622644 
 127.324778 36.033889 274.579786 
 127.324778 36.034000 272.586090 
 127.324889 36.034000 273.387890 
 127.324889 36.034111 271.496425 
 127.324889 36.034222 269.657717 
 127.325000 36.034222 270.503801 
 127.325000 36.034333 268.770362 
 127.325000 36.034444 267.093097 
 127.325111 36.034444 267.972019 
 127.325111 36.034556 266.399979 
 127.325111 36.034667 264.892636 
 127.325111 36.034778 263.446056 
 127.325222 36.034778 264.386592 
 127.325222 36.034889 263.051292 
 127.325222 36.035000 261.779702 
 127.325333 36.035000 262.723280 
 127.325333 36.035111 261.564441 
 127.325333 36.035222 260.472045 
 127.325444 36.035222 261.400904 
 127.325444 36.035333 260.420550 
 127.325444 36.035444 259.512394 
 127.325556 36.035444 260.410913 
 127.325556 36.035556 259.613993 
 127.325556 36.035667 258.890911 
 127.325667 36.035667 259.739991 
 127.325667 36.035778 259.128748 
 127.325667 36.035889 258.592736 
 127.325778 36.035889 259.375521 
 127.325778 36.036000 258.951562 
 127.325778 36.036111 258.603441 
 127.325778 36.036222 258.332200 
 127.325889 36.036222 259.065422 
 127.325889 36.036333 258.906671 
 127.325889 36.036444 258.825573 
 127.326000 36.036444 259.452014 
 127.326000 36.036556 259.482535 
 127.326000 36.036667 259.591219 
 127.326111 36.036667 260.092975 
 127.326111 36.036778 260.312035 
 127.326111 36.036889 260.609506 
 127.326222 36.036889 260.967044 
 127.326222 36.037000 261.373185 
 127.326222 36.037111 261.858620 
 127.326333 36.037111 262.054042 
 127.326333 36.037222 262.644236 
 127.326333 36.037333 263.314705 
 127.326333 36.037444 264.063162 
 127.326444 36.037444 264.101657 
 127.326444 36.037556 264.954111 
 127.326444 36.037667 265.883884 
 127.326556 36.037667 265.721442 
 127.326556 36.037778 266.752225 
 127.326556 36.037889 267.861367 
 127.326667 36.037889 267.481222 
 127.326667 36.038000 268.684016 
 127.326667 36.038111 269.966273 
 127.326778 36.038111 269.351477 
 127.326778 36.038222 270.723094 
 127.326778 36.038333 272.173298 
 127.326889 36.038333 271.309359 
 127.326889 36.038444 272.844292 
 127.326889 36.038556 274.456663 
 127.327000 36.038556 273.327698 
 127.327000 36.038667 275.019885 
 127.327000 36.038778 276.788090 
 127.327000 36.038889 278.628714 
 127.327111 36.038889 277.228426 
 127.327111 36.039000 279.142341 
 127.327111 36.039111 281.129848 
 127.327222 36.039111 279.435054 
 127.327222 36.039222 281.490263 
 127.327222 36.039333 283.617004 
 127.327333 36.039333 281.619134 
 127.327333 36.039444 283.807749 
 127.327333 36.039556 286.065588 
 127.327444 36.039556 283.751523 
 127.327444 36.039667 286.069227 
 127.327444 36.039778 288.445536 
 127.327556 36.039778 285.810230 
 127.327556 36.039889 288.244411 
 127.327556 36.040000 290.734024 
 127.327556 36.040111 293.286302 
 127.327667 36.040111 290.307484 
 127.327667 36.040222 292.901019 
 127.327667 36.040333 295.554126 
 127.327778 36.040333 292.238265 
 127.327778 36.040445 294.930689 
 127.327778 36.040556 297.670050 
 127.327889 36.040556 294.007524 
 127.327889 36.040667 296.784282 
 127.327889 36.040778 299.604216 
 127.328000 36.040778 295.597840 
 127.328000 36.040889 298.448661 
 127.328000 36.041000 301.338769 
 127.328111 36.041000 296.980852 
 127.328111 36.041111 299.895235 
 127.328111 36.041222 302.844900 
 127.328111 36.041333 305.838224 
 127.328222 36.041333 301.109740 
 127.328222 36.041445 304.113440 
 127.328222 36.041556 307.146429 
 127.328333 36.041556 302.065049 
 127.328333 36.041667 305.106824 
 127.328333 36.041778 308.173674 
 127.328444 36.041778 302.750801 
 127.328444 36.041889 305.819829 
 127.328444 36.042000 308.909674 
 127.328556 36.042000 303.141872 
 127.328556 36.042111 306.227323 
 127.328556 36.042222 309.334667 
 127.328667 36.042222 303.237607 
 127.328667 36.042333 306.323511 
 127.328667 36.042445 309.432322 
 127.328778 36.042556 306.085936 
 127.328778 36.042667 309.185656 
 127.328778 36.042778 312.291350 
 127.328889 36.042778 305.513835 
 127.328889 36.042889 308.594215 
 127.328889 36.043000 311.681676 
 127.329000 36.043000 304.593236 
 127.329000 36.043111 307.639046 
 127.329000 36.043222 310.692990 
 127.329111 36.043222 303.318303 
 127.329111 36.043333 306.325299 
 127.329111 36.043444 309.336266 
 127.329222 36.043444 301.678918 
 127.329222 36.043555 304.637946 
 127.329222 36.043667 307.596875 
 127.329333 36.043667 299.685627 
 127.329333 36.043778 302.588106 
 127.329333 36.043889 305.486531 
 127.329333 36.044000 308.373982 
 127.329444 36.044000 300.170058 
 127.329444 36.044111 302.995157 
 127.329444 36.044222 305.810493 
 127.329556 36.044222 297.391277 
 127.329556 36.044333 300.140809 
 127.329556 36.044444 302.876973 
 127.329667 36.044444 294.251023 
 127.329667 36.044555 296.918378 
 127.329667 36.044667 299.568950 
 127.329778 36.044667 290.773006 
 127.329778 36.044778 293.356796 
 127.329778 36.044889 295.911758 
 127.329889 36.044889 286.956678 
 127.329889 36.045000 289.447220 
 127.329889 36.045111 291.906280 
 127.329889 36.045222 294.340738 
 127.330000 36.045222 285.225132 
 127.330000 36.045333 287.584311 
 127.330000 36.045444 289.916230 
 127.330111 36.045444 280.696110 
 127.330111 36.045555 282.952215 
 127.330111 36.045667 285.178661 
 127.330222 36.045667 275.897195 
 127.330222 36.045778 278.051631 
 127.330222 36.045889 280.166939 
 127.330333 36.045889 270.839357 
 127.330333 36.046000 272.886819 
 127.330333 36.046111 274.893680 
 127.330444 36.046111 265.565286 
 127.330444 36.046222 267.505262 
 127.330444 36.046333 269.403448 
 127.330556 36.046444 261.923912 
 127.330556 36.046556 263.717072 
 127.330556 36.046667 265.466635 
 127.330667 36.046667 256.191298 
 127.330667 36.046778 257.877705 
 127.330667 36.046889 259.520009 
 127.330778 36.046889 250.329056 
 127.330778 36.047000 251.911015 
 127.330778 36.047111 253.448646 
 127.330889 36.047111 244.389620 
 127.330889 36.047222 245.870271 
 127.330889 36.047333 247.309077 
 127.331000 36.047333 238.401017 
 127.331000 36.047444 239.781817 
 127.331000 36.047556 241.123330 
 127.331111 36.047556 232.413375 
 127.331111 36.047667 233.701500 
 127.331111 36.047778 234.950581 
 127.331111 36.047889 236.155906 
 127.331222 36.047889 227.658625 
 127.331222 36.048000 228.820758 
 127.331222 36.048111 229.940027 
 127.331333 36.048111 221.703804 
 127.331333 36.048222 222.785049 
 127.331333 36.048333 223.826294 
 127.331444 36.048333 215.888962 
 127.331444 36.048444 216.894108 
 127.331444 36.048556 217.862195 
 127.331556 36.048556 210.242014 
 127.331556 36.048667 211.179916 
 127.331556 36.048778 212.082005 
 127.331667 36.048778 204.820389 
 127.331667 36.048889 205.698324 
 127.331667 36.049000 206.541868 
 127.331667 36.049111 207.349534 
 127.331778 36.049111 200.482380 
 127.331778 36.049222 201.273682 
 127.331778 36.049333 202.032237 
 127.331889 36.049333 195.581739 
 127.331889 36.049444 196.330055 
 127.331889 36.049556 197.047395 
 127.332000 36.049556 191.027769 
 127.332000 36.049667 191.740942 
 127.332000 36.049778 192.425010 
 127.332111 36.049778 186.867860 
 127.332111 36.049889 187.553622 
 127.332111 36.050000 188.212223 
 127.332222 36.050000 183.128676 
 127.332222 36.050111 183.795774 
 127.332222 36.050222 184.435455 
 127.332333 36.050222 179.850770 
 127.332333 36.050333 180.505375 
 127.332333 36.050444 181.134615 
 127.332333 36.050556 181.741044 
 127.332444 36.050556 177.705347 
 127.332444 36.050667 178.331162 
 127.332444 36.050778 178.936202 
 127.332556 36.050778 175.427351 
 127.332556 36.050889 176.057302 
 127.332556 36.051000 176.666349 
 127.332667 36.051000 173.687111 
 127.332667 36.051111 174.326185 
 127.332667 36.051222 174.946263 
 127.332778 36.051222 172.506406 
 127.332778 36.051333 173.159964 
 127.332778 36.051444 173.796334 
 127.332889 36.051444 171.893870 
 127.332889 36.051556 172.566676 
 127.332889 36.051667 173.225106 
 127.332889 36.051778 173.868520 
 127.333000 36.051778 172.556412 
 127.333000 36.051889 173.239646 
 127.333000 36.052000 173.909413 
 127.333111 36.052000 173.129232 
 127.333111 36.052111 173.840382 
 127.333111 36.052222 174.539463 
 127.333222 36.052222 174.283641 
 127.333222 36.052333 175.024905 
 127.333222 36.052444 175.755338 
 127.333333 36.052444 176.011285 
 127.333333 36.052556 176.784083 
 127.333333 36.052667 177.548427 
 127.333444 36.052667 178.300314 
 127.333444 36.052778 179.103724 
 127.333444 36.052889 179.901024 
 127.333556 36.052889 181.131156 
 127.333556 36.053000 181.966178 
 127.333556 36.053111 182.795924 
 127.333556 36.053222 183.617893 
 127.333667 36.053222 185.345804 
 127.333667 36.053333 186.206542 
 127.333667 36.053445 187.061489 
 127.333778 36.053445 189.218293 
 127.333778 36.053556 190.106256 
 127.333778 36.053667 190.990361 
 127.333889 36.053667 193.544322 
 127.333889 36.053778 194.457882 
 127.333889 36.053889 195.367861 
 127.334000 36.053889 198.292034 
 127.334000 36.054000 199.227367 
 127.334000 36.054111 200.159226 
 127.334111 36.054111 203.415682 
 127.334111 36.054222 204.369827 
 127.334111 36.054333 205.317180 
 127.334111 36.054445 206.261217 
 127.334222 36.054445 209.841601 
 127.334222 36.054556 210.800707 
 127.334222 36.054667 211.756279 
 127.334333 36.054667 215.590091 
 127.334333 36.054778 216.555001 
 127.334333 36.054889 217.516028 
 127.334444 36.054889 221.569900 
 127.334444 36.055000 222.534203 
 127.334444 36.055111 223.494162 
 127.334556 36.055111 227.721106 
 127.334556 36.055222 228.679614 
 127.334556 36.055333 229.629942 
 127.334667 36.055333 233.994943 
 127.334667 36.055444 234.938863 
 127.334667 36.055556 235.874025 
 127.334667 36.055667 236.803782 
 127.334778 36.055667 241.249965 
 127.334778 36.055778 242.162587 
 127.334778 36.055889 243.069116 
 127.334889 36.055889 247.562444 
 127.334889 36.056000 248.446564 
 127.334889 36.056111 249.320855 
 127.335000 36.056111 253.811733 
 127.335000 36.056222 254.658341 
 127.335000 36.056333 255.494532 
 127.335111 36.056333 259.947813 
 127.335111 36.056444 260.749551 
 127.335111 36.056555 261.540326 
 127.335222 36.056555 265.907597 
 127.335222 36.056667 266.657368 
 127.335222 36.056778 267.395698 
 127.335333 36.056778 271.643379 
 127.335333 36.056889 272.334359 
 127.335333 36.057000 273.014662 
 127.335333 36.057111 273.683333 
 127.335444 36.057111 277.721729 
 127.335444 36.057222 278.336490 
 127.335444 36.057333 278.939354 
 127.335556 36.057333 282.776289 
 127.335556 36.057444 283.319708 
 127.335556 36.057555 283.851094 
 127.335667 36.057555 287.445425 
 127.335667 36.057667 287.912389 
 127.335667 36.057778 288.368099 
 127.335778 36.057778 291.692420 
 127.335778 36.057889 292.077741 
 127.335778 36.058000 292.452505 
 127.335889 36.058000 295.471233 
 127.335889 36.058111 295.772054 
 127.335889 36.058222 296.062360 
 127.336000 36.058222 298.752390 
 127.336000 36.058333 298.965752 
 127.336000 36.058444 299.168808 
 127.336000 36.058556 299.361559 
 127.336111 36.058556 301.625044 
 127.336111 36.058667 301.738821 
 127.336111 36.058778 301.843078 
 127.336222 36.058778 303.727958 
 127.336222 36.058889 303.751780 
 127.336222 36.059000 303.766695 
 127.336333 36.059000 305.251662 
 127.336333 36.059111 305.185527 
 127.336333 36.059222 305.111289 
 127.336444 36.059222 306.183514 
 127.336444 36.059333 306.028239 
 127.336444 36.059444 305.865857 
 127.336556 36.059444 306.511779 
 127.336556 36.059556 306.268810 
 127.336556 36.059667 306.020765 
 127.336667 36.059778 305.905094 
 127.336667 36.059889 305.573972 
 127.336667 36.060000 305.238895 
 127.336778 36.060000 304.937404 
 127.336778 36.060111 304.527022 
 127.336778 36.060222 304.114272 
 127.336889 36.060222 303.372742 
 127.336889 36.060333 302.887005 
 127.336889 36.060444 302.402327 
 127.337000 36.060444 301.221274 
 127.337000 36.060556 300.666350 
 127.337000 36.060667 300.114634 
 127.337111 36.060667 298.500683 
 127.337111 36.060778 297.882918 
 127.337111 36.060889 297.270633 
 127.337222 36.060889 295.229012 
 127.337222 36.061000 294.555358 
 127.337222 36.061111 293.888423 
 127.337333 36.061222 290.712235 
 127.337333 36.061333 289.999505 
 127.337333 36.061444 289.297775 
 127.337444 36.061444 286.378971 
 127.337444 36.061556 285.628709 
 127.337444 36.061667 284.891971 
 127.337556 36.061667 281.592876 
 127.337556 36.061778 280.813918 
 127.337556 36.061889 280.051045 
 127.337667 36.061889 276.384933 
 127.337667 36.062000 275.586423 
 127.337667 36.062111 274.805249 
 127.337778 36.062111 270.798301 
 127.337778 36.062222 269.991178 
 127.337778 36.062333 269.202546 
 127.337889 36.062333 264.870969 
 127.337889 36.062444 264.063512 
 127.337889 36.062556 263.277094 
 127.338000 36.062556 258.651710 
 127.338000 36.062667 257.853786 
 127.338000 36.062778 257.079429 
 127.338000 36.062889 256.330611 
 127.338111 36.062889 251.398611 
 127.338111 36.063000 250.647448 
 127.338111 36.063111 249.922930 
 127.338222 36.063111 244.754692 
 127.338222 36.063222 244.035160 
 127.338222 36.063333 243.344664 
 127.338333 36.063333 237.959770 
 127.338333 36.063444 237.281472 
 127.338333 36.063556 236.634518 
 127.338444 36.063556 231.069782 
 127.338444 36.063667 230.442131 
 127.338444 36.063778 229.848028 
 127.338556 36.063778 224.123615 
 127.338556 36.063889 223.554755 
 127.338556 36.064000 223.023420 
 127.338667 36.064000 217.177454 
 127.338667 36.064111 216.677191 
 127.338667 36.064222 216.216159 
 127.338667 36.064333 215.793013 
 127.338778 36.064333 209.845378 
 127.338778 36.064444 209.462781 
 127.338778 36.064556 209.119801 
 127.338889 36.064556 203.113724 
 127.338889 36.064667 202.816717 
 127.338889 36.064778 202.561836 
 127.339000 36.064778 196.516586 
 127.339000 36.064889 196.312887 
 127.339000 36.065000 196.152374 
 127.339111 36.065000 190.105616 
 127.339111 36.065111 190.001708 
 127.339111 36.065222 189.941833 
 127.339222 36.065222 183.911673 
 127.339222 36.065333 183.913425 
 127.339222 36.065445 183.959960 
 127.339333 36.065445 177.982689 
 127.339333 36.065556 178.095127 
 127.339333 36.065667 178.253103 
 127.339333 36.065778 178.455860 
 127.339444 36.065778 172.572864 
 127.339444 36.065889 172.846593 
 127.339444 36.066000 173.165216 
 127.339556 36.066000 167.388912 
 127.339556 36.066111 167.781961 
 127.339556 36.066222 168.219798 
 127.339667 36.066222 162.564703 
 127.339667 36.066333 163.079973 
 127.339667 36.066445 163.640707 
 127.339778 36.066445 158.138123 
 127.339778 36.066556 158.776690 
 127.339778 36.066667 159.461456 
 127.339889 36.066667 154.123851 
 127.339889 36.066778 154.888039 
 127.339889 36.066889 155.698108 
 127.340000 36.066889 150.553678 
 127.340000 36.067000 151.444208 
 127.340000 36.067111 152.380099 
 127.340111 36.067222 148.458022 
 127.340111 36.067333 149.517844 
 127.340111 36.067445 150.621658 
 127.340222 36.067445 145.950214 
 127.340222 36.067556 147.134705 
 127.340222 36.067667 148.362223 
 127.340333 36.067667 143.928591 
 127.340333 36.067778 145.236340 
 127.340333 36.067889 146.585971 
 127.340444 36.067889 142.411068 
 127.340444 36.068000 143.839978 
 127.340444 36.068111 145.309452 
 127.340556 36.068111 141.399263 
 127.340556 36.068222 142.949402 
 127.340556 36.068333 144.533236 
 127.340667 36.068333 140.904955 
 127.340667 36.068444 142.570563 
 127.340667 36.068555 144.267835 
 127.340778 36.068555 140.925385 
 127.340778 36.068667 142.702718 
 127.340778 36.068778 144.509553 
 127.340778 36.068889 146.351062 
 127.340889 36.068889 143.351043 
 127.340889 36.069000 145.266309 
 127.340889 36.069111 147.207659 
 127.341000 36.069111 144.508253 
 127.341000 36.069222 146.523947 
 127.341000 36.069333 148.563301 
 127.341111 36.069333 146.173728 
 127.341111 36.069444 148.284466 
 127.341111 36.069555 150.416345 
 127.341222 36.069555 148.336394 
 127.341222 36.069667 150.536437 
 127.341222 36.069778 152.758849 
 127.341333 36.069778 150.993934 
 127.341333 36.069889 153.273170 
 127.341333 36.070000 155.576135 
 127.341444 36.070000 154.124056 
 127.341444 36.070111 156.479742 
 127.341444 36.070222 158.856663 
 127.341444 36.070333 161.245446 
 127.341556 36.070333 160.144112 
 127.341556 36.070444 162.587992 
 127.341556 36.070555 165.040916 
 127.341667 36.070555 164.248069 
 127.341667 36.070667 166.751644 
 127.341667 36.070778 169.265728 
 127.341778 36.070778 168.778805 
 127.341778 36.070889 171.330072 
 127.341778 36.071000 173.893413 
 127.341889 36.071000 173.706310 
 127.341889 36.071111 176.301722 
 127.341889 36.071222 178.906424 
 127.342000 36.071222 179.012743 
 127.342000 36.071333 181.644150 
 127.342000 36.071444 184.282012 
 127.342111 36.071444 184.673825 
 127.342111 36.071556 187.337450 
 127.342111 36.071667 189.995498 
 127.342111 36.071778 192.655891 
 127.342222 36.071778 193.346018 
 127.342222 36.071889 196.020154 
 127.342222 36.072000 198.693720 
 127.342333 36.072000 199.645234 
 127.342333 36.072111 202.326608 
 127.342333 36.072222 205.004470 
 127.342444 36.072222 206.206500 
 127.342444 36.072333 208.890708 
 127.342444 36.072444 211.559232 
 127.342556 36.072444 212.996234 
 127.342556 36.072556 215.669447 
 127.342556 36.072667 218.324040 
 127.342667 36.072667 219.983317 
 127.342667 36.072778 222.636186 
 127.342667 36.072889 225.267519 
 127.342778 36.072889 227.130302 
 127.342778 36.073000 229.753333 
 127.342778 36.073111 232.351942 
 127.342778 36.073222 234.933953 
 127.342889 36.073222 236.987390 
 127.342889 36.073333 239.548099 
 127.342889 36.073444 242.080486 
 127.343000 36.073444 244.297436 
 127.343000 36.073556 246.806143 
 127.343000 36.073667 249.283761 
 127.343111 36.073667 251.648046 
 127.343111 36.073778 254.095052 
 127.343111 36.073889 256.508259 
 127.343222 36.073889 258.995571 
 127.343222 36.074000 261.371171 
 127.343222 36.074111 263.714327 
 127.343333 36.074111 266.307050 
 127.343333 36.074222 268.597566 
 127.343333 36.074333 270.856898 
 127.343444 36.074333 273.528741 
 127.343444 36.074444 275.728669 
 127.343444 36.074556 277.894616 
 127.343444 36.074667 280.018249 
 127.343556 36.074667 282.726631 
 127.343556 36.074778 284.789704 
 127.343556 36.074889 286.808129 
 127.343667 36.074889 289.544844 
 127.343667 36.075000 291.495735 
 127.343667 36.075111 293.402994 
 127.343778 36.075111 296.148379 
 127.343778 36.075222 297.974741 
 127.343778 36.075333 299.758337 
 127.343889 36.075333 302.484004 
 127.343889 36.075444 304.180363 
 127.343889 36.075556 305.831537 
 127.344000 36.075556 308.517496 
 127.344000 36.075667 310.075216 
 127.344000 36.075778 311.585443 
 127.344000 36.075889 313.044860 
 127.344111 36.075889 315.616508 
 127.344111 36.076000 316.975297 
 127.344111 36.076111 318.283798 
 127.344222 36.076111 320.763254 
 127.344222 36.076222 321.965475 
 127.344222 36.076333 323.115436 
 127.344333 36.076333 325.475298 
 127.344333 36.076444 326.513713 
 127.344333 36.076556 327.498056 
 127.344444 36.076556 329.719044 
 127.344444 36.076667 330.588282 
 127.344444 36.076778 331.398915 
 127.344556 36.076778 333.455306 
 127.344556 36.076889 334.147450 
 127.344556 36.077000 334.780142 
 127.344667 36.077000 336.653786 
 127.344667 36.077111 337.163173 
 127.344667 36.077222 337.612477 
 127.344667 36.077333 338.003118 
 127.344778 36.077333 339.601864 
 127.344778 36.077444 339.863107 
 127.344778 36.077556 340.064716 
 127.344889 36.077556 341.438056 
 127.344889 36.077667 341.507246 
 127.344889 36.077778 341.515918 
 127.345000 36.077778 342.644263 
 127.345000 36.077889 342.517814 
 127.345000 36.078000 342.331003 
 127.345111 36.078000 343.200204 
 127.345111 36.078111 342.875618 
 127.345111 36.078222 342.491078 
 127.345222 36.078222 343.085536 
 127.345222 36.078333 342.561283 
 127.345222 36.078445 341.976679 
 127.345222 36.078556 341.333220 
 127.345333 36.078556 341.561229 
 127.345333 36.078667 340.776755 
 127.345333 36.078778 339.934435 
 127.345444 36.078778 339.864167 
 127.345444 36.078889 338.880339 
 127.345444 36.079000 337.839931 
 127.345556 36.079000 337.463137 
 127.345556 36.079111 336.281267 
 127.345556 36.079222 335.042169 
 127.345667 36.079222 334.353264 
 127.345667 36.079333 332.978057 
 127.345667 36.079445 331.544757 
 127.345667 36.079556 330.059008 
 127.345778 36.079556 328.971601 
 127.345778 36.079667 327.347567 
 127.345778 36.079778 325.673207 
 127.345889 36.079778 324.269556 
 127.345889 36.079889 322.459328 
 127.345889 36.080000 320.601146 
 127.346000 36.080000 318.880055 
 127.346000 36.080111 316.888984 
 127.346000 36.080222 314.849024 
 127.346000 36.080333 312.764799 
 127.346111 36.080333 310.654472 
 127.346111 36.080444 308.442615 
 127.346111 36.080556 306.189407 
 127.346222 36.080556 303.771896 
 127.346222 36.080667 301.395548 
 127.346222 36.080778 298.980979 
 127.346333 36.080778 296.268173 
 127.346333 36.080889 293.735713 
 127.346333 36.081000 291.163913 
 127.346333 36.081111 288.558518 
 127.346444 36.081111 285.486775 
 
