# Supplementary material for: Terrain Referenced Navigation Using a Multilayer Radial Basis Function-Based Extreme Learning Machine
Source: Hindawi journal article supplement (doi:10.1155/2019/9142694), 2019-07-11
Supplement: f1 [file 9142694.f1.zip › 9142694_Supplementary information files/CompareMatchingResults_180909/SVMRTrainResult.dat]

127.173333 35.703000 396.553158 
 127.173444 35.703000 397.399334 
 127.173556 35.703000 398.097196 
 127.173667 35.703000 398.644468 
 127.173889 35.703000 399.273552 
 127.174111 35.703000 399.266807 
 127.174222 35.703000 399.020617 
 127.174333 35.703000 398.610597 
 127.174444 35.703000 398.036691 
 127.173444 35.703222 394.951575 
 127.173556 35.703222 395.714945 
 127.173667 35.703222 396.328783 
 127.173778 35.703222 396.788973 
 127.174000 35.703222 397.239289 
 127.174222 35.703222 397.048076 
 127.174333 35.703222 396.707881 
 127.174444 35.703222 396.203825 
 127.174556 35.703222 395.534709 
 127.173556 35.703445 393.429039 
 127.173667 35.703445 394.108040 
 127.173778 35.703445 394.634165 
 127.173889 35.703445 395.005315 
 127.174111 35.703445 395.271454 
 127.174333 35.703445 394.890722 
 127.174444 35.703445 394.454824 
 127.174556 35.703445 393.853842 
 127.174667 35.703445 393.088605 
 127.173667 35.703778 390.951526 
 127.173778 35.703778 391.573601 
 127.173889 35.703778 392.041730 
 127.174000 35.703778 392.352440 
 127.174222 35.703778 392.493801 
 127.174444 35.703778 391.983651 
 127.174556 35.703778 391.481448 
 127.174667 35.703778 390.814574 
 127.174778 35.703778 389.982122 
 127.173778 35.704000 389.645382 
 127.173889 35.704000 390.175976 
 127.174000 35.704000 390.549561 
 127.174111 35.704000 390.764247 
 127.174333 35.704000 390.708089 
 127.174556 35.704000 389.995802 
 127.174667 35.704000 389.392066 
 127.174778 35.704000 388.622442 
 127.174889 35.704000 387.688601 
 127.173889 35.700556 428.943047 
 127.174000 35.700556 428.210249 
 127.174111 35.700556 427.307716 
 127.174222 35.700556 426.236948 
 127.174444 35.700556 423.589953 
 127.174667 35.700556 420.277971 
 127.174778 35.700556 418.376312 
 127.174889 35.700556 416.316133 
 127.175000 35.700556 414.097083 
 127.173889 35.700667 427.386603 
 127.174000 35.700667 426.691196 
 127.174111 35.700667 425.826567 
 127.174222 35.700667 424.794079 
 127.174444 35.700667 422.224600 
 127.174667 35.700667 418.990872 
 127.174778 35.700667 417.128449 
 127.174889 35.700667 415.107440 
 127.175000 35.700667 412.927487 
 127.173889 35.700778 425.849942 
 127.174000 35.700778 425.191945 
 127.174111 35.700778 424.365227 
 127.174222 35.700778 423.371019 
 127.174444 35.700778 420.879022 
 127.174667 35.700778 417.723472 
 127.174778 35.700778 415.900231 
 127.174889 35.700778 413.918331 
 127.175000 35.700778 411.777403 
 127.174000 35.700778 425.191945 
 127.174111 35.700778 424.365227 
 127.174222 35.700778 423.371019 
 127.174333 35.700778 422.208097 
 127.174556 35.700778 419.382850 
 127.174778 35.700778 415.900231 
 127.174889 35.700778 413.918331 
 127.175000 35.700778 411.777403 
 127.175111 35.700778 409.483929 
 127.174000 35.700889 423.707808 
 127.174111 35.700889 422.919121 
 127.174222 35.700889 421.963301 
 127.174333 35.700889 420.839111 
 127.174556 35.700889 418.091939 
 127.174778 35.700889 414.687759 
 127.174889 35.700889 412.745018 
 127.175000 35.700889 410.643157 
 127.175111 35.700889 408.388526 
 127.174000 35.701000 422.244335 
 127.174111 35.701000 421.493645 
 127.174222 35.701000 420.576170 
 127.174333 35.701000 419.490658 
 127.174556 35.701000 416.821421 
 127.174778 35.701000 413.495501 
 127.174889 35.701000 411.591816 
 127.175000 35.701000 409.528908 
 127.175111 35.701000 407.312999 
 127.174000 35.701111 420.796916 
 127.174111 35.701111 420.084301 
 127.174222 35.701111 419.205239 
 127.174333 35.701111 418.158462 
 127.174556 35.701111 415.567248 
 127.174778 35.701111 412.319636 
 127.174889 35.701111 410.455016 
 127.175000 35.701111 408.431060 
 127.175111 35.701111 406.253863 
 127.174111 35.701111 420.084301 
 127.174222 35.701111 419.205239 
 127.174333 35.701111 418.158462 
 127.174444 35.701111 416.946126 
 127.174667 35.701111 414.025315 
 127.174889 35.701111 410.455016 
 127.175000 35.701111 408.431060 
 127.175111 35.701111 406.253863 
 127.175222 35.701111 403.923318 
 127.174111 35.701222 418.696314 
 127.174222 35.701222 417.855580 
 127.174333 35.701222 416.847443 
 127.174444 35.701222 415.673925 
 127.174667 35.701222 412.831108 
 127.174889 35.701222 409.338761 
 127.175000 35.701222 407.353604 
 127.175111 35.701222 405.214955 
 127.175222 35.701222 402.922703 
 127.174111 35.701333 417.325268 
 127.174222 35.701333 416.522888 
 127.174333 35.701333 415.553408 
 127.174444 35.701333 414.418713 
 127.174667 35.701333 411.653874 
 127.174889 35.701333 408.239424 
 127.175000 35.701333 406.293023 
 127.175111 35.701333 404.192872 
 127.175222 35.701333 401.938853 
 127.174111 35.701445 415.973905 
 127.174222 35.701445 415.209819 
 127.174333 35.701445 414.278924 
 127.174444 35.701445 413.182972 
 127.174667 35.701445 410.495918 
 127.174889 35.701445 407.159134 
 127.175000 35.701445 405.251362 
 127.175111 35.701445 403.189571 
 127.175222 35.701445 400.973639 
 127.174222 35.701445 415.209819 
 127.174333 35.701445 414.278924 
 127.174444 35.701445 413.182972 
 127.174556 35.701445 411.920942 
 127.174778 35.701445 408.907180 
 127.175000 35.701445 405.251362 
 127.175111 35.701445 403.189571 
 127.175222 35.701445 400.973639 
 127.175333 35.701445 398.610534 
 127.174222 35.701556 413.918871 
 127.174333 35.701556 413.026403 
 127.174444 35.701556 411.969025 
 127.174556 35.701556 410.745704 
 127.174778 35.701556 407.809353 
 127.175000 35.701556 404.230509 
 127.175111 35.701556 402.206855 
 127.175222 35.701556 400.028781 
 127.175333 35.701556 397.703129 
 127.174222 35.701667 412.645871 
 127.174333 35.701667 411.791784 
 127.174444 35.701667 410.772923 
 127.174556 35.701667 409.588244 
 127.174778 35.701667 406.729143 
 127.175000 35.701667 403.227076 
 127.175111 35.701667 401.241450 
 127.175222 35.701667 399.101113 
 127.175333 35.701667 396.812788 
 127.174222 35.701778 411.395437 
 127.174333 35.701778 410.579532 
 127.174444 35.701778 409.598980 
 127.174556 35.701778 408.452724 
 127.174778 35.701778 405.670406 
 127.175000 35.701778 402.244616 
 127.175111 35.701778 400.296755 
 127.175222 35.701778 398.193888 
 127.175333 35.701778 395.942615 
 127.174333 35.701889 409.385676 
 127.174444 35.701889 408.443335 
 127.174556 35.701889 407.335395 
 127.174667 35.701889 406.064410 
 127.174889 35.701889 403.034908 
 127.175111 35.701889 399.369582 
 127.175222 35.701889 397.304025 
 127.175333 35.701889 395.089639 
 127.175444 35.701889 392.726579 
 127.174333 35.702000 408.214497 
 127.174444 35.702000 407.310118 
 127.174556 35.702000 406.240234 
 127.174667 35.702000 405.007270 
 127.174889 35.702000 402.053546 
 127.175111 35.702000 398.463156 
 127.175222 35.702000 396.434605 
 127.175333 35.702000 394.256795 
 127.175444 35.702000 391.929881 
 127.174333 35.702111 407.062118 
 127.174444 35.702111 406.195562 
 127.174556 35.702111 405.163586 
 127.174667 35.702111 403.968486 
 127.174889 35.702111 401.090199 
 127.175111 35.702111 397.574375 
 127.175222 35.702111 395.582634 
 127.175333 35.702111 393.441198 
 127.175444 35.702111 391.150219 
 127.174333 35.702222 405.932629 
 127.174444 35.702222 405.103607 
 127.174556 35.702222 404.109242 
 127.174667 35.702222 402.951699 
 127.174889 35.702222 400.148212 
 127.175111 35.702222 396.706289 
 127.175222 35.702222 394.751017 
 127.175333 35.702222 392.645609 
 127.175444 35.702222 390.390218 
 127.174444 35.702222 405.103607 
 127.174556 35.702222 404.109242 
 127.174667 35.702222 402.951699 
 127.174778 35.702222 401.630186 
 127.175000 35.702222 398.505302 
 127.175222 35.702222 394.751017 
 127.175333 35.702222 392.645609 
 127.175444 35.702222 390.390218 
 127.175556 35.702222 387.992209 
 127.174444 35.702333 404.030583 
 127.174556 35.702333 403.073640 
 127.174667 35.702333 401.953457 
 127.174778 35.702333 400.669234 
 127.175000 35.702333 397.618333 
 127.175222 35.702333 393.936849 
 127.175333 35.702333 391.867232 
 127.175444 35.702333 389.647183 
 127.175556 35.702333 387.283960 
 127.174444 35.702445 402.978452 
 127.174556 35.702445 402.058658 
 127.174667 35.702445 400.975555 
 127.174778 35.702445 399.728333 
 127.175000 35.702445 396.750817 
 127.175222 35.702445 393.141513 
 127.175333 35.702445 391.107368 
 127.175444 35.702445 388.922341 
 127.175556 35.702445 386.593578 
 127.174444 35.702556 401.949009 
 127.174556 35.702556 401.066010 
 127.174667 35.702556 400.019625 
 127.174778 35.702556 398.809034 
 127.175000 35.702556 395.904145 
 127.175222 35.702556 392.366242 
 127.175333 35.702556 390.367175 
 127.175444 35.702556 388.216772 
 127.175556 35.702556 385.922070 
 127.174556 35.702556 401.066010 
 127.174667 35.702556 400.019625 
 127.174778 35.702556 398.809034 
 127.174889 35.702556 397.437372 
 127.175111 35.702556 394.213825 
 127.175333 35.702556 390.367175 
 127.175444 35.702556 388.216772 
 127.175556 35.702556 385.922070 
 127.175667 35.702556 383.483521 
 127.174556 35.702667 400.092280 
 127.174667 35.702667 399.082358 
 127.174778 35.702667 397.908135 
 127.174889 35.702667 396.572626 
 127.175111 35.702667 393.420600 
 127.175333 35.702667 389.643984 
 127.175444 35.702667 387.527911 
 127.175556 35.702667 385.266974 
 127.175667 35.702667 382.861625 
 127.174556 35.702778 399.140791 
 127.174667 35.702778 398.166934 
 127.174778 35.702778 397.028676 
 127.174889 35.702778 395.728909 
 127.175111 35.702778 392.647568 
 127.175333 35.702778 388.940138 
 127.175444 35.702778 386.857967 
 127.175556 35.702778 384.630367 
 127.175667 35.702778 382.257792 
 127.174556 35.702889 398.208224 
 127.174667 35.702889 397.270141 
 127.174778 35.702889 396.167548 
 127.174889 35.702889 394.903220 
 127.175111 35.702889 391.891940 
 127.175333 35.702889 388.253054 
 127.175444 35.702889 386.204461 
 127.175556 35.702889 384.009870 
 127.175667 35.702889 381.669739 
 127.174667 35.702889 397.270141 
 127.174778 35.702889 396.167548 
 127.174889 35.702889 394.903220 
 127.175000 35.702889 393.476643 
 127.175222 35.702889 390.148928 
 127.175444 35.702889 386.204461 
 127.175556 35.702889 384.009870 
 127.175667 35.702889 381.669739 
 127.175778 35.702889 379.192005 
 127.174667 35.703000 396.394979 
 127.174778 35.703000 395.327613 
 127.174889 35.703000 394.098280 
 127.175000 35.703000 392.706460 
 127.175222 35.703000 389.447201 
 127.175444 35.703000 385.569442 
 127.175556 35.703000 383.407407 
 127.175667 35.703000 381.099266 
 127.175778 35.703000 378.652861 
 127.174667 35.703111 395.538329 
 127.174778 35.703111 394.505857 
 127.174889 35.703111 393.311181 
 127.175000 35.703111 391.953774 
 127.175222 35.703111 388.762273 
 127.175444 35.703111 384.950514 
 127.175556 35.703111 382.820678 
 127.175667 35.703111 380.544171 
 127.175778 35.703111 378.128739 
 127.174667 35.703222 394.701591 
 127.174778 35.703222 393.703602 
 127.174889 35.703222 392.543167 
 127.175000 35.703222 391.219754 
 127.175222 35.703222 388.095164 
 127.175444 35.703222 384.348554 
 127.175556 35.703222 382.250492 
 127.175667 35.703222 380.005194 
 127.175778 35.703222 377.620313 
 127.174778 35.703222 393.703602 
 127.174889 35.703222 392.543167 
 127.175000 35.703222 391.219754 
 127.175111 35.703222 389.737150 
 127.175333 35.703222 386.298917 
 127.175556 35.703222 382.250492 
 127.175667 35.703222 380.005194 
 127.175778 35.703222 377.620313 
 127.175889 35.703222 375.096615 
 127.174778 35.703333 392.922016 
 127.174889 35.703333 391.795333 
 127.175000 35.703333 390.505422 
 127.175111 35.703333 389.055961 
 127.175333 35.703333 385.682822 
 127.175556 35.703333 381.697526 
 127.175667 35.703333 379.482948 
 127.175778 35.703333 377.128133 
 127.175889 35.703333 374.633853 
 127.174778 35.703445 392.158226 
 127.174889 35.703445 391.064908 
 127.175000 35.703445 389.808109 
 127.175111 35.703445 388.391396 
 127.175333 35.703445 385.082560 
 127.175556 35.703445 381.159601 
 127.175667 35.703445 378.975348 
 127.175778 35.703445 376.650207 
 127.175889 35.703445 374.184955 
 127.174778 35.703556 391.414660 
 127.174889 35.703556 390.354190 
 127.175000 35.703556 389.129982 
 127.175111 35.703556 387.745499 
 127.175333 35.703556 384.499927 
 127.175556 35.703556 380.638275 
 127.175667 35.703556 378.483838 
 127.175778 35.703556 376.187866 
 127.175889 35.703556 373.751142 
 127.174889 35.703556 390.354190 
 127.175000 35.703556 389.129982 
 127.175111 35.703556 387.745499 
 127.175222 35.703556 386.200542 
 127.175444 35.703556 382.643795 
 127.175667 35.703556 378.483838 
 127.175778 35.703556 376.187866 
 127.175889 35.703556 373.751142 
 127.176000 35.703556 371.182229 
 127.174889 35.703667 389.660498 
 127.175000 35.703667 388.468461 
 127.175111 35.703667 387.115786 
 127.175222 35.703667 385.602271 
 127.175444 35.703667 382.107013 
 127.175667 35.703667 378.006407 
 127.175778 35.703667 375.739190 
 127.175889 35.703667 373.330585 
 127.176000 35.703667 370.789072 
 127.174889 35.703778 388.985968 
 127.175000 35.703778 387.825557 
 127.175111 35.703778 386.504145 
 127.175222 35.703778 385.021529 
 127.175444 35.703778 381.586682 
 127.175667 35.703778 377.544366 
 127.175778 35.703778 375.305382 
 127.175889 35.703778 372.924380 
 127.176000 35.703778 370.409761 
 127.174889 35.703889 388.328010 
 127.175000 35.703889 387.198776 
 127.175111 35.703889 385.908179 
 127.175222 35.703889 384.456014 
 127.175444 35.703889 381.080685 
 127.175667 35.703889 377.095779 
 127.175778 35.703889 374.884595 
 127.175889 35.703889 372.530767 
 127.176000 35.703889 370.042620 
 127.175000 35.703889 387.198776 
 127.175111 35.703889 385.908179 
 127.175222 35.703889 384.456014 
 127.175333 35.703889 382.846800 
 127.175556 35.703889 379.163516 
 127.175778 35.703889 374.884595 
 127.175889 35.703889 372.530767 
 127.176000 35.703889 370.042620 
 127.176111 35.703889 367.421247 
 127.175000 35.704000 386.589978 
 127.175111 35.704000 385.329629 
 127.175222 35.704000 383.907349 
 127.175333 35.704000 382.327565 
 127.175556 35.704000 378.701681 
 127.175778 35.704000 374.477909 
 127.175889 35.704000 372.150726 
 127.176000 35.704000 369.688531 
 127.176111 35.704000 367.092424 
 127.175000 35.704111 385.996753 
 127.175111 35.704111 384.766180 
 127.175222 35.704111 383.373314 
 127.175333 35.704111 381.822489 
 127.175556 35.704111 378.253077 
 127.175778 35.704111 374.083547 
 127.175889 35.704111 371.782564 
 127.176000 35.704111 369.345883 
 127.176111 35.704111 366.774615 
 127.175000 35.704222 385.419837 
 127.175111 35.704222 384.218503 
 127.175222 35.704222 382.854517 
 127.175333 35.704222 381.332121 
 127.175556 35.704222 377.818137 
 127.175778 35.704222 373.701829 
 127.175889 35.704222 371.426550 
 127.176000 35.704222 369.014895 
 127.176111 35.704222 366.467986 
 127.175111 35.704222 384.218503 
 127.175222 35.704222 382.854517 
 127.175333 35.704222 381.332121 
 127.175444 35.704222 379.651465 
 127.175667 35.704222 375.832631 
 127.175889 35.704222 371.426550 
 127.176000 35.704222 369.014895 
 127.176111 35.704222 366.467986 
 127.176222 35.704222 363.795058 
 127.175111 35.704333 383.687148 
 127.175222 35.704333 382.351449 
 127.175333 35.704333 380.856897 
 127.175444 35.704333 379.203641 
 127.175667 35.704333 375.438032 
 127.175889 35.704333 371.082858 
 127.176000 35.704333 368.695695 
 127.176111 35.704333 366.172622 
 127.176222 35.704333 363.522808 
 127.175111 35.704444 383.169921 
 127.175222 35.704444 381.862006 
 127.175333 35.704444 380.394798 
 127.175444 35.704444 378.768448 
 127.175667 35.704444 375.055095 
 127.175889 35.704444 370.749890 
 127.176000 35.704444 368.386765 
 127.176111 35.704444 365.887081 
 127.176222 35.704444 363.259948 
 127.175111 35.704555 382.668222 
 127.175222 35.704555 381.387484 
 127.175333 35.704555 379.947019 
 127.175444 35.704555 378.346981 
 127.175667 35.704555 374.684723 
 127.175889 35.704555 370.428369 
 127.176000 35.704555 368.088738 
 127.176111 35.704555 365.611915 
 127.176222 35.704555 363.006947 
 127.175222 35.704555 381.387484 
 127.175333 35.704555 379.947019 
 127.175444 35.704555 378.346981 
 127.175556 35.704555 376.592714 
 127.175778 35.704555 372.629661 
 127.176000 35.704555 368.088738 
 127.176111 35.704555 365.611915 
 127.176222 35.704555 363.006947 
 127.176333 35.704555 360.275253 
 127.175222 35.704667 380.925851 
 127.175333 35.704667 379.511614 
 127.175444 35.704667 377.937378 
 127.175556 35.704667 376.208410 
 127.175778 35.704667 372.294384 
 127.176000 35.704667 367.800153 
 127.176111 35.704667 365.345737 
 127.176222 35.704667 362.762493 
 127.176333 35.704667 360.051850 
 127.175222 35.704778 380.478287 
 127.175333 35.704778 379.089665 
 127.175444 35.704778 377.540626 
 127.175556 35.704778 375.836362 
 127.175778 35.704778 371.970206 
 127.176000 35.704778 367.521561 
 127.176111 35.704778 365.089019 
 127.176222 35.704778 362.526980 
 127.176333 35.704778 359.836886 
 127.175222 35.704889 380.042831 
 127.175333 35.704889 378.679293 
 127.175444 35.704889 377.154929 
 127.175556 35.704889 375.474854 
 127.175778 35.704889 371.655569 
 127.176000 35.704889 367.251553 
 127.176111 35.704889 364.840426 
 127.176222 35.704889 362.299147 
 127.176333 35.704889 359.629168 
 127.175333 35.704889 378.679293 
 127.175444 35.704889 377.154929 
 127.175556 35.704889 375.474854 
 127.175667 35.704889 373.639587 
 127.175889 35.704889 369.523658 
 127.176111 35.704889 364.840426 
 127.176222 35.704889 362.299147 
 127.176333 35.704889 359.629168 
 127.176444 35.704889 356.840432 
 127.175333 35.705000 378.280802 
 127.175444 35.705000 376.780540 
 127.175556 35.705000 375.124093 
 127.175667 35.705000 373.311984 
 127.175889 35.705000 369.240768 
 127.176111 35.705000 364.599951 
 127.176222 35.705000 362.078948 
 127.176333 35.705000 359.428617 
 127.176444 35.705000 356.658849 
 127.175333 35.705111 377.894404 
 127.175444 35.705111 376.417627 
 127.175556 35.705111 374.784203 
 127.175667 35.705111 372.994660 
 127.175889 35.705111 368.967013 
 127.176111 35.705111 364.367527 
 127.176222 35.705111 361.866283 
 127.176333 35.705111 359.235099 
 127.176444 35.705111 356.483817 
 127.175333 35.705222 377.518319 
 127.175444 35.705222 376.064488 
 127.175556 35.705222 374.453559 
 127.175667 35.705222 372.686064 
 127.175889 35.705222 368.700988 
 127.176111 35.705222 364.141891 
 127.176222 35.705222 361.659958 
 127.176333 35.705222 359.047487 
 127.176444 35.705222 356.314274 
 127.175444 35.705222 376.064488 
 127.175556 35.705222 374.453559 
 127.175667 35.705222 372.686064 
 127.175778 35.705222 370.768247 
 127.176000 35.705222 366.491804 
 127.176222 35.705222 361.659958 
 127.176333 35.705222 359.047487 
 127.176444 35.705222 356.314274 
 127.176556 35.705222 353.462049 
 127.175444 35.705333 375.721876 
 127.175556 35.705333 374.132833 
 127.175667 35.705333 372.386791 
 127.175778 35.705333 370.489933 
 127.176000 35.705333 366.253880 
 127.176222 35.705333 361.460216 
 127.176333 35.705333 358.865962 
 127.176444 35.705333 356.150341 
 127.176556 35.705333 353.315094 
 127.175444 35.705444 375.388147 
 127.175556 35.705444 373.820456 
 127.175667 35.705444 372.095344 
 127.175778 35.705444 370.218933 
 127.176000 35.705444 366.022297 
 127.176222 35.705444 361.265902 
 127.176333 35.705444 358.689434 
 127.176444 35.705444 355.990991 
 127.176556 35.705444 353.172326 
 127.175444 35.705555 375.063978 
 127.175556 35.705555 373.517028 
 127.175667 35.705555 371.812250 
 127.175778 35.705555 369.955709 
 127.176000 35.705555 365.797380 
 127.176222 35.705555 361.077218 
 127.176333 35.705555 358.518045 
 127.176444 35.705555 355.836311 
 127.176556 35.705555 353.033777 
 127.175556 35.705555 373.517028 
 127.175667 35.705555 371.812250 
 127.175778 35.705555 369.955709 
 127.175889 35.705555 367.948302 
 127.176111 35.705555 363.504167 
 127.176333 35.705555 358.518045 
 127.176444 35.705555 355.836311 
 127.176556 35.705555 353.033777 
 127.176667 35.705555 350.121097 
 127.175556 35.705667 373.221030 
 127.175667 35.705667 371.536061 
 127.175778 35.705667 369.698878 
 127.175889 35.705667 367.710385 
 127.176111 35.705667 363.302599 
 127.176333 35.705667 358.350740 
 127.176444 35.705667 355.685305 
 127.176556 35.705667 352.898513 
 127.176667 35.705667 350.000978 
 127.175556 35.705778 372.932511 
 127.175667 35.705778 371.266790 
 127.175778 35.705778 369.448420 
 127.175889 35.705778 367.478314 
 127.176111 35.705778 363.105874 
 127.176333 35.705778 358.187352 
 127.176444 35.705778 355.537782 
 127.176556 35.705778 352.766318 
 127.176667 35.705778 349.883536 
 127.175556 35.705889 372.651468 
 127.175667 35.705889 371.004402 
 127.175778 35.705889 369.204273 
 127.175889 35.705889 367.251996 
 127.176111 35.705889 362.913848 
 127.176333 35.705889 358.027688 
 127.176444 35.705889 355.393530 
 127.176556 35.705889 352.636959 
 127.176667 35.705889 349.768518 
 127.175667 35.705889 371.004402 
 127.175778 35.705889 369.204273 
 127.175889 35.705889 367.251996 
 127.176000 35.705889 365.154773 
 127.176222 35.705889 360.537640 
 127.176444 35.705889 355.393530 
 127.176556 35.705889 352.636959 
 127.176667 35.705889 349.768518 
 127.176778 35.705889 346.790209 
 127.175667 35.706000 370.747514 
 127.175778 35.706000 368.965115 
 127.175889 35.706000 367.030177 
 127.176000 35.706000 364.949851 
 127.176222 35.706000 360.365170 
 127.176444 35.706000 355.251594 
 127.176556 35.706000 352.509540 
 127.176667 35.706000 349.655082 
 127.176778 35.706000 346.690237 
 127.175667 35.706111 370.496527 
 127.175778 35.706111 368.731292 
 127.175889 35.706111 366.813142 
 127.176000 35.706111 364.749185 
 127.176222 35.706111 360.195962 
 127.176444 35.706111 355.112010 
 127.176556 35.706111 352.384052 
 127.176667 35.706111 349.543180 
 127.176778 35.706111 346.591423 
 127.175667 35.706222 370.250096 
 127.175778 35.706222 368.501519 
 127.175889 35.706222 366.599671 
 127.176000 35.706222 364.551615 
 127.176222 35.706222 360.028971 
 127.176444 35.706222 354.973850 
 127.176556 35.706222 352.259620 
 127.176667 35.706222 349.431991 
 127.176778 35.706222 346.492997 
 127.175778 35.706222 368.501519 
 127.175889 35.706222 366.599671 
 127.176000 35.706222 364.551615 
 127.176111 35.706222 362.358618 
 127.176333 35.706222 357.564242 
 127.176556 35.706222 352.259620 
 127.176667 35.706222 349.431991 
 127.176778 35.706222 346.492997 
 127.176889 35.706222 343.453967 
 127.175778 35.706333 368.276110 
 127.175889 35.706333 366.390025 
 127.176000 35.706333 364.357352 
 127.176111 35.706333 362.179365 
 127.176333 35.706333 357.413781 
 127.176556 35.706333 352.136236 
 127.176667 35.706333 349.321465 
 127.176778 35.706333 346.394875 
 127.176889 35.706333 343.367767 
 127.175778 35.706444 368.053816 
 127.175889 35.706444 366.183013 
 127.176000 35.706444 364.165263 
 127.176111 35.706444 362.001847 
 127.176333 35.706444 357.264240 
 127.176556 35.706444 352.013043 
 127.176667 35.706444 349.210799 
 127.176778 35.706444 346.296304 
 127.176889 35.706444 343.280830 
 127.175778 35.706555 367.834929 
 127.175889 35.706555 365.978881 
 127.176000 35.706555 363.975548 
 127.176111 35.706555 361.826219 
 127.176333 35.706555 357.115691 
 127.176556 35.706555 351.890037 
 127.176667 35.706555 349.099955 
 127.176778 35.706555 346.197213 
 127.176889 35.706555 343.193055 
 127.175889 35.706555 365.978881 
 127.176000 35.706555 363.975548 
 127.176111 35.706555 361.826219 
 127.176222 35.706555 359.539070 
 127.176444 35.706555 354.565397 
 127.176667 35.706555 349.099955 
 127.176778 35.706555 346.197213 
 127.176889 35.706555 343.193055 
 127.177000 35.706555 340.089706 
 127.175889 35.706667 365.776464 
 127.176000 35.706667 363.787098 
 127.176111 35.706667 361.651428 
 127.176222 35.706667 359.377592 
 127.176444 35.706667 354.429497 
 127.176667 35.706667 348.988140 
 127.176778 35.706667 346.096858 
 127.176889 35.706667 343.103746 
 127.177000 35.706667 340.011038 
 127.175889 35.706778 365.575656 
 127.176000 35.706778 363.599790 
 127.176111 35.706778 361.477331 
 127.176222 35.706778 359.216386 
 127.176444 35.706778 354.293093 
 127.176667 35.706778 348.875141 
 127.176778 35.706778 345.995013 
 127.176889 35.706778 343.012667 
 127.177000 35.706778 339.930344 
 127.175889 35.706889 365.376347 
 127.176000 35.706889 363.413497 
 127.176111 35.706889 361.303790 
 127.176222 35.706889 359.055298 
 127.176444 35.706889 354.156008 
 127.176667 35.706889 348.760759 
 127.176778 35.706889 345.891473 
 127.176889 35.706889 342.919604 
 127.177000 35.706889 339.847400 
 127.176000 35.706889 363.413497 
 127.176111 35.706889 361.303790 
 127.176222 35.706889 359.055298 
 127.176333 35.706889 356.669631 
 127.176556 35.706889 351.516299 
 127.176778 35.706889 345.891473 
 127.176889 35.706889 342.919604 
 127.177000 35.706889 339.847400 
 127.177111 35.706889 336.686798 
 127.176000 35.707000 363.227140 
 127.176111 35.707000 361.129776 
 127.176222 35.707000 358.893353 
 127.176333 35.707000 356.519486 
 127.176556 35.707000 351.388866 
 127.176778 35.707000 345.785503 
 127.176889 35.707000 342.823868 
 127.177000 35.707000 339.761565 
 127.177111 35.707000 336.610506 
 127.176000 35.707111 363.040927 
 127.176111 35.707111 360.955463 
 127.176222 35.707111 358.730691 
 127.176333 35.707111 356.368231 
 127.176556 35.707111 351.259611 
 127.176778 35.707111 345.677101 
 127.176889 35.707111 342.725433 
 127.177000 35.707111 339.672787 
 127.177111 35.707111 336.531053 
 127.176000 35.707222 362.853793 
 127.176111 35.707222 360.779836 
 127.176222 35.707222 358.566346 
 127.176333 35.707222 356.214949 
 127.176556 35.707222 351.127712 
 127.176778 35.707222 345.565536 
 127.176889 35.707222 342.623611 
 127.177000 35.707222 339.580424 
 127.177111 35.707222 336.447838 
 127.176111 35.707222 360.779836 
 127.176222 35.707222 358.566346 
 127.176333 35.707222 356.214949 
 127.176444 35.707222 353.734775 
 127.176667 35.707222 348.403931 
 127.176889 35.707222 342.623611 
 127.177000 35.707222 339.580424 
 127.177111 35.707222 336.447838 
 127.177222 35.707222 333.228232 
 127.176111 35.707333 360.603092 
 127.176222 35.707333 358.400486 
 127.176333 35.707333 356.059778 
 127.176444 35.707333 353.590069 
 127.176667 35.707333 348.279477 
 127.176889 35.707333 342.518417 
 127.177000 35.707333 339.484467 
 127.177111 35.707333 336.360834 
 127.177222 35.707333 333.149902 
 127.176111 35.707444 360.424225 
 127.176222 35.707444 358.232151 
 127.176333 35.707444 355.901805 
 127.176444 35.707444 353.442261 
 127.176667 35.707444 348.151391 
 127.176889 35.707444 342.409163 
 127.177000 35.707444 339.384273 
 127.177111 35.707444 336.269439 
 127.177222 35.707444 333.067049 
 127.176111 35.707556 360.243147 
 127.176222 35.707556 358.061246 
 127.176333 35.707556 355.740928 
 127.176444 35.707556 353.291239 
 127.176667 35.707556 348.019550 
 127.176889 35.707556 342.295713 
 127.177000 35.707556 339.279699 
 127.177111 35.707556 336.173506 
 127.177222 35.707556 332.979524 
 127.176222 35.707556 358.061246 
 127.176333 35.707556 355.740928 
 127.176444 35.707556 353.291239 
 127.176556 35.707556 350.714084 
 127.176778 35.707556 345.209758 
 127.177000 35.707556 339.279699 
 127.177111 35.707556 336.173506 
 127.177222 35.707556 332.979524 
 127.177333 35.707556 329.710184 
 127.176222 35.707667 357.887703 
 127.176333 35.707667 355.577072 
 127.176444 35.707667 353.136925 
 127.176556 35.707667 350.569168 
 127.176778 35.707667 345.083139 
 127.177000 35.707667 339.170647 
 127.177111 35.707667 336.072932 
 127.177222 35.707667 332.887222 
 127.177333 35.707667 329.625922 
 127.176222 35.707778 357.710567 
 127.176333 35.707778 355.409327 
 127.176444 35.707778 352.978451 
 127.176556 35.707778 350.419848 
 127.176778 35.707778 344.951702 
 127.177000 35.707778 339.056463 
 127.177111 35.707778 335.967107 
 127.177222 35.707778 332.789570 
 127.177333 35.707778 329.536236 
 127.176222 35.707889 357.530102 
 127.176333 35.707889 355.237936 
 127.176444 35.707889 352.816039 
 127.176556 35.707889 350.266325 
 127.176778 35.707889 344.815611 
 127.177000 35.707889 338.937274 
 127.177111 35.707889 335.856139 
 127.177222 35.707889 332.686663 
 127.177333 35.707889 329.441205 
 127.176333 35.707889 355.237936 
 127.176444 35.707889 352.816039 
 127.176556 35.707889 350.266325 
 127.176667 35.707889 347.598807 
 127.176889 35.707889 341.927670 
 127.177111 35.707889 335.856139 
 127.177222 35.707889 332.686663 
 127.177333 35.707889 329.441205 
 127.177444 35.707889 326.122215 
 127.176333 35.708000 355.061985 
 127.176444 35.708000 352.648820 
 127.176556 35.708000 350.107772 
 127.176667 35.708000 347.448830 
 127.176889 35.708000 341.794554 
 127.177111 35.708000 335.739406 
 127.177222 35.708000 332.577917 
 127.177333 35.708000 329.340284 
 127.177444 35.708000 326.028959 
 127.176333 35.708111 354.881769 
 127.176444 35.708111 352.477069 
 127.176556 35.708111 349.944447 
 127.176667 35.708111 347.293866 
 127.176889 35.708111 341.656099 
 127.177111 35.708111 335.617084 
 127.177222 35.708111 332.463492 
 127.177333 35.708111 329.233619 
 127.177444 35.708111 325.929915 
 127.176333 35.708222 354.696370 
 127.176444 35.708222 352.299910 
 127.176556 35.708222 349.775514 
 127.176667 35.708222 347.133121 
 127.176889 35.708222 341.511592 
 127.177111 35.708222 335.488538 
 127.177222 35.708222 332.342793 
 127.177333 35.708222 329.120651 
 127.177444 35.708222 325.824563 
 127.176444 35.708222 352.299910 
 127.176556 35.708222 349.775514 
 127.176667 35.708222 347.133121 
 127.176778 35.708222 344.374862 
 127.177000 35.708222 338.545604 
 127.177222 35.708222 332.342793 
 127.177333 35.708222 329.120651 
 127.177444 35.708222 325.824563 
 127.177556 35.708222 322.467307 
 127.176444 35.708333 352.117361 
 127.176556 35.708333 349.600990 
 127.176667 35.708333 346.966610 
 127.176778 35.708333 344.216350 
 127.177000 35.708333 338.402980 
 127.177222 35.708333 332.215824 
 127.177333 35.708333 329.001385 
 127.177444 35.708333 325.712906 
 127.177556 35.708333 322.363139 
 127.176444 35.708444 351.929492 
 127.176556 35.708444 349.420943 
 127.176667 35.708444 346.794398 
 127.176778 35.708444 344.051988 
 127.177000 35.708444 338.254278 
 127.177222 35.708444 332.082647 
 127.177333 35.708444 328.875881 
 127.177444 35.708444 325.595002 
 127.177556 35.708444 322.252738 
 127.176556 35.708444 349.420943 
 127.176667 35.708444 346.794398 
 127.176778 35.708444 344.051988 
 127.176889 35.708444 341.204518 
 127.177111 35.708444 335.212856 
 127.177333 35.708444 328.875881 
 127.177444 35.708444 325.595002 
 127.177556 35.708444 322.252738 
 127.177667 35.708444 318.851528 
 127.176556 35.708556 349.234520 
 127.176667 35.708556 346.615674 
 127.176778 35.708556 343.881002 
 127.176889 35.708556 341.041283 
 127.177111 35.708556 335.065128 
 127.177333 35.708556 328.743559 
 127.177444 35.708556 325.470312 
 127.177556 35.708556 322.135601 
 127.177667 35.708556 318.741862 
 127.176556 35.708667 349.042145 
 127.176667 35.708667 346.430847 
 127.176778 35.708667 343.703787 
 127.176889 35.708667 340.871719 
 127.177111 35.708667 334.910942 
 127.177333 35.708667 328.604744 
 127.177444 35.708667 325.339142 
 127.177556 35.708667 322.012020 
 127.177667 35.708667 318.625810 
 127.176556 35.708778 348.842953 
 127.176667 35.708778 346.239091 
 127.176778 35.708778 343.519556 
 127.176889 35.708778 340.695076 
 127.177111 35.708778 334.749626 
 127.177333 35.708778 328.458841 
 127.177444 35.708778 325.200937 
 127.177556 35.708778 321.881478 
 127.177667 35.708778 318.502888 
 127.176667 35.708778 346.239091 
 127.176778 35.708778 343.519556 
 127.176889 35.708778 340.695076 
 127.177000 35.708778 337.767930 
 127.177222 35.708778 331.642548 
 127.177444 35.708778 325.200937 
 127.177556 35.708778 321.881478 
 127.177667 35.708778 318.502888 
 127.177778 35.708778 315.078156 
 127.176667 35.708889 346.040889 
 127.176778 35.708889 343.328779 
 127.176889 35.708889 340.511812 
 127.177000 35.708889 337.592263 
 127.177222 35.708889 331.482233 
 127.177444 35.708889 325.056081 
 127.177556 35.708889 321.744342 
 127.177667 35.708889 318.373451 
 127.177778 35.708889 314.956366 
 127.176667 35.709000 345.835397 
 127.176778 35.709000 343.130652 
 127.176889 35.709000 340.321160 
 127.177000 35.709000 337.409194 
 127.177222 35.709000 331.314561 
 127.177444 35.709000 324.903998 
 127.177556 35.709000 321.600076 
 127.177667 35.709000 318.236999 
 127.177778 35.709000 314.827693 
 127.176667 35.709111 345.623178 
 127.176778 35.709111 342.925722 
 127.176889 35.709111 340.123656 
 127.177000 35.709111 337.219247 
 127.177222 35.709111 331.140025 
 127.177444 35.709111 324.745151 
 127.177556 35.709111 321.449125 
 127.177667 35.709111 318.093962 
 127.177778 35.709111 314.692552 
 127.176778 35.709111 342.925722 
 127.176889 35.709111 340.123656 
 127.177000 35.709111 337.219247 
 127.177111 35.709111 334.223915 
 127.177333 35.709111 327.979633 
 127.177556 35.709111 321.449125 
 127.177667 35.709111 318.093962 
 127.177778 35.709111 314.692552 
 127.177889 35.709111 311.247244 
 127.176778 35.709222 342.713167 
 127.176889 35.709222 339.918515 
 127.177000 35.709222 337.021674 
 127.177111 35.709222 334.034034 
 127.177333 35.709222 327.805456 
 127.177556 35.709222 321.290935 
 127.177667 35.709222 317.943821 
 127.177778 35.709222 314.550463 
 127.177889 35.709222 311.113197 
 127.176778 35.709333 342.493231 
 127.176889 35.709333 339.705981 
 127.177000 35.709333 336.816719 
 127.177111 35.709333 333.836805 
 127.177333 35.709333 327.624062 
 127.177556 35.709333 321.125738 
 127.177667 35.709333 317.786808 
 127.177778 35.709333 314.401651 
 127.177889 35.709333 310.972596 
 127.176778 35.709444 342.266225 
 127.176889 35.709444 339.486363 
 127.177000 35.709444 336.604691 
 127.177111 35.709444 333.632535 
 127.177333 35.709444 327.435753 
 127.177556 35.709444 320.953831 
 127.177667 35.709444 317.623213 
 127.177778 35.709444 314.246404 
 127.177889 35.709444 310.825721 
 127.176889 35.709444 339.486363 
 127.177000 35.709444 336.604691 
 127.177111 35.709444 333.632535 
 127.177222 35.709444 330.572236 
 127.177444 35.709444 324.225470 
 127.177667 35.709444 317.623213 
 127.177778 35.709444 314.246404 
 127.177889 35.709444 310.825721 
 127.178000 35.709444 307.374152 
 127.176889 35.709556 339.258848 
 127.177000 35.709556 336.384813 
 127.177111 35.709556 333.420484 
 127.177222 35.709556 330.368196 
 127.177444 35.709556 324.037877 
 127.177667 35.709556 317.452492 
 127.177778 35.709556 314.084215 
 127.177889 35.709556 310.672106 
 127.178000 35.709556 307.229111 
 127.176889 35.709667 339.024174 
 127.177000 35.709667 336.157810 
 127.177111 35.709667 333.201364 
 127.177222 35.709667 330.157160 
 127.177444 35.709667 323.843497 
 127.177667 35.709667 317.275265 
 127.177778 35.709667 313.915685 
 127.177889 35.709667 310.512328 
 127.178000 35.709667 307.078103 
 127.176889 35.709778 338.781505 
 127.177000 35.709778 335.922884 
 127.177111 35.709778 332.974414 
 127.177222 35.709778 329.938409 
 127.177444 35.709778 323.641690 
 127.177667 35.709778 317.090969 
 127.177778 35.709778 313.740289 
 127.177889 35.709778 310.345903 
 127.178000 35.709778 306.920680 
 127.177000 35.709778 335.922884 
 127.177111 35.709778 332.974414 
 127.177222 35.709778 329.938409 
 127.177333 35.709778 326.826717 
 127.177556 35.709778 320.395660 
 127.177778 35.709778 313.740289 
 127.177889 35.709778 310.345903 
 127.178000 35.709778 306.920680 
 127.178111 35.709778 303.466798 
 127.177000 35.709889 335.680841 
 127.177111 35.709889 332.740426 
 127.177222 35.709889 329.712717 
 127.177333 35.709889 326.609525 
 127.177556 35.709889 320.196005 
 127.177778 35.709889 313.558700 
 127.177889 35.709889 310.173481 
 127.178000 35.709889 306.757469 
 127.178111 35.709889 303.312830 
 127.177000 35.710000 335.430864 
 127.177111 35.710000 332.498619 
 127.177222 35.710000 329.479342 
 127.177333 35.710000 326.384806 
 127.177556 35.710000 319.989187 
 127.177778 35.710000 313.370377 
 127.177889 35.710000 309.994561 
 127.178000 35.710000 306.588009 
 127.178111 35.710000 303.152873 
 127.177000 35.710111 335.173392 
 127.177111 35.710111 332.249430 
 127.177222 35.710111 329.238718 
 127.177333 35.710111 326.152989 
 127.177556 35.710111 319.775625 
 127.177778 35.710111 313.175724 
 127.177889 35.710111 309.809540 
 127.178000 35.710111 306.412689 
 127.178111 35.710111 302.987308 
 127.177111 35.710111 332.249430 
 127.177222 35.710111 329.238718 
 127.177333 35.710111 326.152989 
 127.177444 35.710111 322.994555 
 127.177667 35.710111 316.498500 
 127.177889 35.710111 309.809540 
 127.178000 35.710111 306.412689 
 127.178111 35.710111 302.987308 
 127.178222 35.710111 299.546201 
 127.177111 35.710222 331.993361 
 127.177222 35.710222 328.991343 
 127.177333 35.710222 325.914565 
 127.177444 35.710222 322.765328 
 127.177667 35.710222 316.288254 
 127.177889 35.710222 309.618870 
 127.178000 35.710222 306.231950 
 127.178111 35.710222 302.816567 
 127.178222 35.710222 299.385478 
 127.177111 35.710333 331.729601 
 127.177222 35.710333 328.736444 
 127.177333 35.710333 325.668805 
 127.177444 35.710333 322.528967 
 127.177667 35.710333 316.071326 
 127.177889 35.710333 309.422025 
 127.178000 35.710333 306.045308 
 127.178111 35.710333 302.640206 
 127.178222 35.710333 299.219428 
 127.177111 35.710444 331.459141 
 127.177222 35.710444 328.474992 
 127.177333 35.710444 325.416654 
 127.177444 35.710444 322.286396 
 127.177667 35.710444 315.848591 
 127.177889 35.710444 309.219826 
 127.178000 35.710444 305.853556 
 127.178111 35.710444 302.458988 
 127.178222 35.710444 299.048784 
 127.177222 35.710444 328.474992 
 127.177333 35.710444 325.416654 
 127.177444 35.710444 322.286396 
 127.177556 35.710444 319.096289 
 127.177778 35.710444 312.555704 
 127.178000 35.710444 305.853556 
 127.178111 35.710444 302.458988 
 127.178222 35.710444 299.048784 
 127.178333 35.710444 295.624896 
 127.177222 35.710556 328.206195 
 127.177333 35.710556 325.157364 
 127.177444 35.710556 322.036906 
 127.177556 35.710556 318.856846 
 127.177778 35.710556 312.336991 
 127.178000 35.710556 305.656194 
 127.178111 35.710556 302.272456 
 127.178222 35.710556 298.873130 
 127.178333 35.710556 295.460155 
 127.177222 35.710667 327.931098 
 127.177333 35.710667 324.891955 
 127.177444 35.710667 321.781493 
 127.177556 35.710667 318.611688 
 127.177778 35.710667 312.113021 
 127.178000 35.710667 305.454075 
 127.178111 35.710667 302.081431 
 127.178222 35.710667 298.693256 
 127.178333 35.710667 295.291472 
 127.177222 35.710778 327.648890 
 127.177333 35.710778 324.619658 
 127.177444 35.710778 321.519430 
 127.177556 35.710778 318.360133 
 127.177778 35.710778 311.883196 
 127.178000 35.710778 305.246688 
 127.178111 35.710778 301.885446 
 127.178222 35.710778 298.508737 
 127.178333 35.710778 295.118467 
 127.177333 35.710778 324.619658 
 127.177444 35.710778 321.519430 
 127.177556 35.710778 318.360133 
 127.177667 35.710778 315.143971 
 127.177889 35.710778 308.579953 
 127.178111 35.710778 301.885446 
 127.178222 35.710778 298.508737 
 127.178333 35.710778 295.118467 
 127.178444 35.710778 291.727084 
 127.177333 35.710889 324.341565 
 127.177444 35.710889 321.251782 
 127.177556 35.710889 318.103217 
 127.177667 35.710889 314.898053 
 127.177889 35.710889 308.356656 
 127.178111 35.710889 301.685376 
 127.178222 35.710889 298.320413 
 127.178333 35.710889 294.941945 
 127.178444 35.710889 291.562366 
 127.177333 35.711000 324.056888 
 127.177444 35.711000 320.977805 
 127.177556 35.711000 317.840239 
 127.177667 35.711000 314.646353 
 127.177889 35.711000 308.128169 
 127.178111 35.711000 301.480742 
 127.178222 35.711000 298.127851 
 127.178333 35.711000 294.761515 
 127.178444 35.711000 291.394078 
 127.177444 35.711111 320.698144 
 127.177556 35.711111 317.571832 
 127.177667 35.711111 314.389492 
 127.177778 35.711111 311.163214 
 127.178000 35.711111 304.597386 
 127.178222 35.711111 297.931597 
 127.178333 35.711111 294.577709 
 127.178444 35.711111 291.222733 
 127.178556 35.711111 287.868364 
 127.177444 35.711222 320.413494 
 127.177556 35.711222 317.298679 
 127.177667 35.711222 314.128137 
 127.177778 35.711222 310.913901 
 127.178000 35.711222 304.372772 
 127.178222 35.711222 297.732232 
 127.178333 35.711222 294.391088 
 127.178444 35.711222 291.048872 
 127.178556 35.711222 287.707266 
 127.177444 35.711333 320.123087 
 127.177556 35.711333 317.020057 
 127.177667 35.711333 313.861611 
 127.177778 35.711333 310.659725 
 127.178000 35.711333 304.143936 
 127.178222 35.711333 297.529314 
 127.178333 35.711333 294.201255 
 127.178444 35.711333 290.872145 
 127.178556 35.711333 287.543651 
 127.177556 35.711333 317.020057 
 127.177667 35.711333 313.861611 
 127.177778 35.711333 310.659725 
 127.177889 35.711333 307.416445 
 127.178111 35.711333 300.844149 
 127.178333 35.711333 294.201255 
 127.178444 35.711333 290.872145 
 127.178556 35.711333 287.543651 
 127.178667 35.711333 284.227779 
 127.177556 35.711444 316.737151 
 127.177667 35.711444 313.591064 
 127.177778 35.711444 310.401798 
 127.177889 35.711444 307.171379 
 127.178111 35.711444 300.625325 
 127.178333 35.711444 294.009116 
 127.178444 35.711444 290.693415 
 127.178556 35.711444 287.378340 
 127.178667 35.711444 284.075839 
 127.177556 35.711556 316.449227 
 127.177667 35.711556 313.315809 
 127.177778 35.711556 310.139480 
 127.177889 35.711556 306.922247 
 127.178111 35.711556 300.403105 
 127.178333 35.711556 293.814273 
 127.178444 35.711556 290.512331 
 127.178556 35.711556 287.211027 
 127.178667 35.711556 283.922253 
 127.177556 35.711667 316.157523 
 127.177667 35.711667 313.037042 
 127.177778 35.711667 309.873929 
 127.177889 35.711667 306.670166 
 127.178111 35.711667 300.178519 
 127.178333 35.711667 293.617662 
 127.178444 35.711667 290.329784 
 127.178556 35.711667 287.042557 
 127.178667 35.711667 283.767819 
 127.177667 35.711667 313.037042 
 127.177778 35.711667 309.873929 
 127.177889 35.711667 306.670166 
 127.178000 35.711667 303.437732 
 127.178222 35.711667 296.904573 
 127.178444 35.711667 290.329784 
 127.178556 35.711667 287.042557 
 127.178667 35.711667 283.767819 
 127.178778 35.711667 280.507019 
 127.177667 35.711778 312.754068 
 127.177778 35.711778 309.604496 
 127.177889 35.711778 306.414537 
 127.178000 35.711778 303.196103 
 127.178222 35.711778 296.691411 
 127.178444 35.711778 290.145422 
 127.178556 35.711778 286.872629 
 127.178667 35.711778 283.612282 
 127.178778 35.711778 280.365819 
 127.177667 35.711889 312.467634 
 127.177778 35.711889 309.331910 
 127.177889 35.711889 306.156066 
 127.178000 35.711889 302.951950 
 127.178222 35.711889 296.476372 
 127.178444 35.711889 289.959843 
 127.178556 35.711889 286.701815 
 127.178667 35.711889 283.456191 
 127.178778 35.711889 280.224398 
 127.177667 35.712000 312.178518 
 127.177778 35.712000 309.056928 
 127.177889 35.712000 305.895490 
 127.178000 35.712000 302.705986 
 127.178222 35.712000 296.260120 
 127.178444 35.712000 289.773655 
 127.178556 35.712000 286.530697 
 127.178667 35.712000 283.300103 
 127.178778 35.712000 280.083286 
 127.177778 35.712000 309.056928 
 127.177889 35.712000 305.895490 
 127.178000 35.712000 302.705986 
 127.178111 35.712000 299.490246 
 127.178333 35.712000 293.017321 
 127.178556 35.712000 286.530697 
 127.178667 35.712000 283.300103 
 127.178778 35.712000 280.083286 
 127.178889 35.712000 276.889161 
 127.177778 35.712111 308.778892 
 127.177889 35.712111 305.632202 
 127.178000 35.712111 302.457656 
 127.178111 35.712111 299.257062 
 127.178333 35.712111 292.814772 
 127.178556 35.712111 286.358981 
 127.178667 35.712111 283.143772 
 127.178778 35.712111 279.942288 
 127.178889 35.712111 276.763397 
 127.177778 35.712222 308.499054 
 127.177889 35.712222 305.367404 
 127.178000 35.712222 302.208110 
 127.178111 35.712222 299.022960 
 127.178333 35.712222 292.611908 
 127.178556 35.712222 286.187553 
 127.178667 35.712222 282.988032 
 127.178778 35.712222 279.802182 
 127.178889 35.712222 276.638826 
 127.177778 35.712333 308.216751 
 127.177889 35.712333 305.100487 
 127.178000 35.712333 301.956795 
 127.178111 35.712333 298.787440 
 127.178333 35.712333 292.408332 
 127.178556 35.712333 286.016125 
 127.178667 35.712333 282.832645 
 127.178778 35.712333 279.662784 
 127.178889 35.712333 276.515317 
 127.177889 35.712333 305.100487 
 127.178000 35.712333 301.956795 
 127.178111 35.712333 298.787440 
 127.178222 35.712333 295.604067 
 127.178444 35.712333 289.211842 
 127.178667 35.712333 282.832645 
 127.178778 35.712333 279.662784 
 127.178889 35.712333 276.515317 
 127.179000 35.712333 273.398831 
 127.177889 35.712444 304.832677 
 127.178000 35.712444 301.704881 
 127.178111 35.712444 298.551620 
 127.178222 35.712444 295.384464 
 127.178444 35.712444 289.024924 
 127.178667 35.712444 282.678449 
 127.178778 35.712444 279.524874 
 127.178889 35.712444 276.393590 
 127.179000 35.712444 273.293142 
 127.177889 35.712556 304.563366 
 127.178000 35.712556 301.451817 
 127.178111 35.712556 298.315000 
 127.178222 35.712556 295.164414 
 127.178444 35.712556 288.838265 
 127.178667 35.712556 282.525218 
 127.178778 35.712556 279.388279 
 127.178889 35.712556 276.273528 
 127.179000 35.712556 273.189464 
 127.177889 35.712667 304.293333 
 127.178000 35.712667 301.198353 
 127.178111 35.712667 298.078304 
 127.178222 35.712667 294.944613 
 127.178444 35.712667 288.652503 
 127.178667 35.712667 282.373527 
 127.178778 35.712667 279.253544 
 127.178889 35.712667 276.155644 
 127.179000 35.712667 273.088280 
 127.178000 35.712667 301.198353 
 127.178111 35.712667 298.078304 
 127.178222 35.712667 294.944613 
 127.178333 35.712667 291.798880 
 127.178556 35.712667 285.506962 
 127.178778 35.712667 279.253544 
 127.178889 35.712667 276.155644 
 127.179000 35.712667 273.088280 
 127.179111 35.712667 270.052579 
 127.178000 35.712778 300.945248 
 127.178111 35.712778 297.842260 
 127.178222 35.712778 294.725756 
 127.178333 35.712778 291.597316 
 127.178556 35.712778 285.340075 
 127.178778 35.712778 279.121201 
 127.178889 35.712778 276.040437 
 127.179000 35.712778 272.990057 
 127.179111 35.712778 269.971184 
 127.178000 35.712889 300.691954 
 127.178111 35.712889 297.606378 
 127.178222 35.712889 294.507410 
 127.178333 35.712889 291.396613 
 127.178556 35.712889 285.174745 
 127.178778 35.712889 278.991102 
 127.178889 35.712889 275.927815 
 127.179000 35.712889 272.894756 
 127.179111 35.712889 269.893047 
 127.178111 35.712889 297.606378 
 127.178222 35.712889 294.507410 
 127.178333 35.712889 291.396613 
 127.178444 35.712889 288.285242 
 127.178667 35.712889 282.076257 
 127.178889 35.712889 275.927815 
 127.179000 35.712889 272.894756 
 127.179111 35.712889 269.893047 
 127.179222 35.712889 266.933141 
 127.178111 35.713000 297.371794 
 127.178222 35.713000 294.290650 
 127.178333 35.713000 291.197782 
 127.178444 35.713000 288.104372 
 127.178667 35.713000 281.931292 
 127.178889 35.713000 275.818468 
 127.179000 35.713000 272.803005 
 127.179111 35.713000 269.818731 
 127.179222 35.713000 266.876049 
 127.178111 35.713111 297.138028 
 127.178222 35.713111 294.075054 
 127.178333 35.713111 291.000461 
 127.178444 35.713111 287.925354 
 127.178667 35.713111 281.788860 
 127.178889 35.713111 275.712324 
 127.179000 35.713111 272.714787 
 127.179111 35.713111 269.748278 
 127.179222 35.713111 266.823143 
 127.178111 35.713222 296.906212 
 127.178222 35.713222 293.861689 
 127.178333 35.713222 290.805649 
 127.178444 35.713222 287.749123 
 127.178667 35.713222 281.649760 
 127.178889 35.713222 275.610050 
 127.179000 35.713222 272.630704 
 127.179111 35.713222 269.682221 
 127.179222 35.713222 266.774894 
 127.178222 35.713222 293.861689 
 127.178333 35.713222 290.805649 
 127.178444 35.713222 287.749123 
 127.178556 35.713222 284.693519 
 127.178778 35.713222 278.619143 
 127.179000 35.713222 272.630704 
 127.179111 35.713222 269.682221 
 127.179222 35.713222 266.774894 
 127.179333 35.713222 263.909717 
 127.178222 35.713333 293.650147 
 127.178333 35.713333 290.612999 
 127.178444 35.713333 287.575392 
 127.178556 35.713333 284.538716 
 127.178778 35.713333 278.502009 
 127.179000 35.713333 272.550764 
 127.179111 35.713333 269.620627 
 127.179222 35.713333 266.731424 
 127.179333 35.713333 263.884156 
 127.178222 35.713444 293.441481 
 127.178333 35.713444 290.423497 
 127.178444 35.713444 287.405075 
 127.178556 35.713444 284.387593 
 127.178778 35.713444 278.389077 
 127.179000 35.713444 272.475535 
 127.179111 35.713444 269.563996 
 127.179222 35.713444 266.693167 
 127.179333 35.713444 263.864054 
 127.178222 35.713556 293.235299 
 127.178333 35.713556 290.236811 
 127.178444 35.713556 287.237904 
 127.178556 35.713556 284.239943 
 127.178778 35.713556 278.280261 
 127.179000 35.713556 272.405054 
 127.179111 35.713556 269.512423 
 127.179222 35.713556 266.660274 
 127.179333 35.713556 263.849622 
 127.178333 35.713556 290.236811 
 127.178444 35.713556 287.237904 
 127.178556 35.713556 284.239943 
 127.178667 35.713556 281.253639 
 127.178889 35.713556 275.328039 
 127.179111 35.713556 269.512423 
 127.179222 35.713556 266.660274 
 127.179333 35.713556 263.849622 
 127.179444 35.713556 261.090236 
 127.178333 35.713667 290.053592 
 127.178444 35.713667 287.074492 
 127.178556 35.713667 284.096341 
 127.178667 35.713667 281.129777 
 127.178889 35.713667 275.243372 
 127.179111 35.713667 269.466294 
 127.179222 35.713667 266.633096 
 127.179333 35.713667 263.841173 
 127.179444 35.713667 261.100246 
 127.178333 35.713778 289.874465 
 127.178444 35.713778 286.915424 
 127.178556 35.713778 283.957332 
 127.178667 35.713778 281.010753 
 127.178889 35.713778 275.164026 
 127.179111 35.713778 269.425957 
 127.179222 35.713778 266.611942 
 127.179333 35.713778 263.838976 
 127.179444 35.713778 261.116736 
 127.178333 35.713889 289.699130 
 127.178444 35.713889 286.760465 
 127.178556 35.713889 283.822744 
 127.178667 35.713889 280.896460 
 127.178889 35.713889 275.090018 
 127.179111 35.713889 269.391551 
 127.179222 35.713889 266.597010 
 127.179333 35.713889 263.843292 
 127.179444 35.713889 261.140024 
 127.178444 35.713889 286.760465 
 127.178556 35.713889 283.822744 
 127.178667 35.713889 280.896460 
 127.178778 35.713889 277.982859 
 127.179000 35.713889 272.225874 
 127.179222 35.713889 266.597010 
 127.179333 35.713889 263.843292 
 127.179444 35.713889 261.140024 
 127.179556 35.713889 258.488171 
 127.178444 35.714000 286.610455 
 127.178556 35.714000 283.693343 
 127.178667 35.714000 280.787587 
 127.178778 35.714000 277.894426 
 127.179000 35.714000 272.177858 
 127.179222 35.714000 266.588620 
 127.179333 35.714000 263.854366 
 127.179444 35.714000 261.170288 
 127.179556 35.714000 258.537365 
 127.178444 35.714111 286.465184 
 127.178556 35.714111 283.568984 
 127.178667 35.714111 280.684053 
 127.178778 35.714111 277.811627 
 127.179000 35.714111 272.136054 
 127.179222 35.714111 266.587006 
 127.179333 35.714111 263.872496 
 127.179444 35.714111 261.207882 
 127.179556 35.714111 258.594163 
 127.178556 35.714111 283.568984 
 127.178667 35.714111 280.684053 
 127.178778 35.714111 277.811627 
 127.178889 35.714111 274.959680 
 127.179111 35.714111 269.341879 
 127.179333 35.714111 263.872496 
 127.179444 35.714111 261.207882 
 127.179556 35.714111 258.594163 
 127.179667 35.714111 256.040495 
 127.178556 35.714222 283.450388 
 127.178667 35.714222 280.586504 
 127.178778 35.714222 277.735030 
 127.178889 35.714222 274.903889 
 127.179111 35.714222 269.327126 
 127.179333 35.714222 263.897870 
 127.179444 35.714222 261.252924 
 127.179556 35.714222 258.658612 
 127.179667 35.714222 256.124052 
 127.178556 35.714333 283.337440 
 127.178667 35.714333 280.494888 
 127.178778 35.714333 277.664649 
 127.178889 35.714333 274.854593 
 127.179111 35.714333 269.319415 
 127.179333 35.714333 263.930822 
 127.179444 35.714333 261.305809 
 127.179556 35.714333 258.731167 
 127.179667 35.714333 256.215977 
 127.178556 35.714445 283.230635 
 127.178667 35.714445 280.409660 
 127.178778 35.714445 277.600896 
 127.178889 35.714445 274.812162 
 127.179111 35.714445 269.319033 
 127.179333 35.714445 263.971558 
 127.179444 35.714445 261.366702 
 127.179556 35.714445 258.811954 
 127.179667 35.714445 256.316357 
 127.178667 35.714445 280.409660 
 127.178778 35.714445 277.600896 
 127.178889 35.714445 274.812162 
 127.179000 35.714445 272.051159 
 127.179222 35.714445 266.625466 
 127.179444 35.714445 261.366702 
 127.179556 35.714445 258.811954 
 127.179667 35.714445 256.316357 
 127.179778 35.714445 253.880930 
 127.178667 35.714556 280.331224 
 127.178778 35.714556 277.544131 
 127.178889 35.714556 274.776912 
 127.179000 35.714556 272.037220 
 127.179222 35.714556 266.653505 
 127.179444 35.714556 261.435705 
 127.179556 35.714556 258.901035 
 127.179667 35.714556 256.425214 
 127.179778 35.714556 254.009292 
 127.178667 35.714667 280.259578 
 127.178778 35.714667 277.494420 
 127.178889 35.714667 274.748976 
 127.179000 35.714667 272.030852 
 127.179222 35.714667 266.689618 
 127.179444 35.714667 261.513280 
 127.179556 35.714667 258.998932 
 127.179667 35.714667 256.543132 
 127.179778 35.714667 254.146961 
 127.178667 35.714778 280.195232 
 127.178778 35.714778 277.452190 
 127.178889 35.714778 274.728698 
 127.179000 35.714778 272.032317 
 127.179222 35.714778 266.733910 
 127.179444 35.714778 261.599372 
 127.179556 35.714778 259.105517 
 127.179667 35.714778 256.669910 
 127.179778 35.714778 254.293660 
 127.178778 35.714778 277.452190 
 127.178889 35.714778 274.728698 
 127.179000 35.714778 272.032317 
 127.179111 35.714778 269.364216 
 127.179333 35.714778 264.142544 
 127.179556 35.714778 259.105517 
 127.179667 35.714778 256.669910 
 127.179778 35.714778 254.293660 
 127.179889 35.714778 251.985316 
 127.178778 35.714889 277.417543 
 127.178889 35.714889 274.716251 
 127.179000 35.714889 272.041856 
 127.179111 35.714889 269.395536 
 127.179333 35.714889 264.216668 
 127.179556 35.714889 259.221360 
 127.179667 35.714889 256.806178 
 127.179778 35.714889 254.450085 
 127.179889 35.714889 252.161600 
 127.178778 35.715000 277.390841 
 127.178889 35.715000 274.711911 
 127.179000 35.715000 272.059662 
 127.179111 35.715000 269.435284 
 127.179333 35.715000 264.299531 
 127.179556 35.715000 259.346254 
 127.179667 35.715000 256.951656 
 127.179778 35.715000 254.615879 
 127.179889 35.715000 252.347416 
 127.178889 35.715000 274.711911 
 127.179000 35.715000 272.059662 
 127.179111 35.715000 269.435284 
 127.179222 35.715000 266.848180 
 127.179444 35.715000 261.798498 
 127.179667 35.715000 256.951656 
 127.179778 35.715000 254.615879 
 127.179889 35.715000 252.347416 
 127.180000 35.715000 250.147445 
 127.178889 35.715111 274.715891 
 127.179000 35.715111 272.086018 
 127.179111 35.715111 269.483807 
 127.179222 35.715111 266.918607 
 127.179444 35.715111 261.911955 
 127.179667 35.715111 257.107025 
 127.179778 35.715111 254.791788 
 127.179889 35.715111 252.543570 
 127.180000 35.715111 250.363594 
 127.178889 35.715222 274.728425 
 127.179000 35.715222 272.121111 
 127.179111 35.715222 269.541250 
 127.179222 35.715222 266.998135 
 127.179444 35.715222 262.034872 
 127.179667 35.715222 257.272215 
 127.179778 35.715222 254.977700 
 127.179889 35.715222 252.749914 
 127.180000 35.715222 250.590119 
 127.178889 35.715333 274.749680 
 127.179000 35.715333 272.165063 
 127.179111 35.715333 269.607687 
 127.179222 35.715333 267.086793 
 127.179444 35.715333 262.167188 
 127.179667 35.715333 257.447079 
 127.179778 35.715333 255.173427 
 127.179889 35.715333 252.966217 
 127.180000 35.715333 250.826752 
 127.179000 35.715333 272.165063 
 127.179111 35.715333 269.607687 
 127.179222 35.715333 267.086793 
 127.179333 35.715333 264.603618 
 127.179556 35.715333 259.778759 
 127.179778 35.715333 255.173427 
 127.179889 35.715333 252.966217 
 127.180000 35.715333 250.826752 
 127.180111 35.715333 248.763053 
 127.179000 35.715445 272.218220 
 127.179111 35.715445 269.683536 
 127.179222 35.715445 267.185066 
 127.179333 35.715445 264.724070 
 127.179556 35.715445 259.942725 
 127.179778 35.715445 255.379794 
 127.179889 35.715445 253.193368 
 127.180000 35.715445 251.074445 
 127.180111 35.715445 249.031029 
 127.179000 35.715556 272.280586 
 127.179111 35.715556 269.768714 
 127.179222 35.715556 267.292789 
 127.179333 35.715556 264.854092 
 127.179556 35.715556 260.116507 
 127.179778 35.715556 255.596230 
 127.179889 35.715556 253.430720 
 127.180000 35.715556 251.332477 
 127.180111 35.715556 249.309486 
 127.179000 35.715667 272.352552 
 127.179111 35.715667 269.863685 
 127.179222 35.715667 267.410496 
 127.179333 35.715667 264.994288 
 127.179556 35.715667 260.300845 
 127.179778 35.715667 255.823611 
 127.179889 35.715667 253.679217 
 127.180000 35.715667 251.601856 
 127.180111 35.715667 249.599496 
 127.179111 35.715667 269.863685 
 127.179222 35.715667 267.410496 
 127.179333 35.715667 264.994288 
 127.179444 35.715667 262.623956 
 127.179667 35.715667 258.033599 
 127.179889 35.715667 253.679217 
 127.180000 35.715667 251.601856 
 127.180111 35.715667 249.599496 
 127.180222 35.715667 247.673624 
 127.179111 35.715778 269.968283 
 127.179222 35.715778 267.537935 
 127.179333 35.715778 265.144324 
 127.179444 35.715778 262.796299 
 127.179667 35.715778 258.249756 
 127.179889 35.715778 253.938121 
 127.180000 35.715778 251.881767 
 127.180111 35.715778 249.900170 
 127.180222 35.715778 247.994868 
 127.179111 35.715889 270.083020 
 127.179222 35.715889 267.675690 
 127.179333 35.715889 265.304852 
 127.179444 35.715889 262.979313 
 127.179667 35.715889 258.476945 
 127.179889 35.715889 254.208430 
 127.180000 35.715889 252.173277 
 127.180111 35.715889 250.212640 
 127.180222 35.715889 248.328112 
 127.179222 35.715889 267.675690 
 127.179333 35.715889 265.304852 
 127.179444 35.715889 262.979313 
 127.179556 35.715889 260.700485 
 127.179778 35.715889 256.310164 
 127.180000 35.715889 252.173277 
 127.180111 35.715889 250.212640 
 127.180222 35.715889 248.328112 
 127.180333 35.715889 246.527218 
 127.179222 35.716000 267.823422 
 127.179333 35.716000 265.475449 
 127.179444 35.716000 263.172491 
 127.179556 35.716000 260.915990 
 127.179778 35.716000 256.569513 
 127.180000 35.716000 252.475475 
 127.180111 35.716000 250.535920 
 127.180222 35.716000 248.672294 
 127.180333 35.716000 246.892114 
 127.179222 35.716111 267.981763 
 127.179333 35.716111 265.656820 
 127.179444 35.716111 263.376607 
 127.179556 35.716111 261.142602 
 127.179778 35.716111 256.840314 
 127.180000 35.716111 252.789486 
 127.180111 35.716111 250.871201 
 127.180222 35.716111 249.028673 
 127.180333 35.716111 247.269409 
 127.179222 35.716222 268.150583 
 127.179333 35.716222 265.848789 
 127.179444 35.716222 263.591441 
 127.179556 35.716222 261.380055 
 127.179778 35.716222 257.122213 
 127.180000 35.716222 253.114873 
 127.180111 35.716222 251.218006 
 127.180222 35.716222 249.396730 
 127.180333 35.716222 247.658545 
 127.179333 35.716222 265.848789 
 127.179444 35.716222 263.591441 
 127.179556 35.716222 261.380055 
 127.179667 35.716222 259.223113 
 127.179889 35.716222 255.085573 
 127.180111 35.716222 251.218006 
 127.180222 35.716222 249.396730 
 127.180333 35.716222 247.658545 
 127.180444 35.716222 246.005281 
 127.179333 35.716333 266.051095 
 127.179444 35.716333 263.816687 
 127.179556 35.716333 261.627997 
 127.179667 35.716333 259.493478 
 127.179889 35.716333 255.400071 
 127.180111 35.716333 251.575768 
 127.180222 35.716333 249.775858 
 127.180333 35.716333 248.058873 
 127.180444 35.716333 246.426706 
 127.179333 35.716444 266.264522 
 127.179444 35.716444 264.053201 
 127.179556 35.716444 261.887357 
 127.179667 35.716444 259.775414 
 127.179889 35.716444 255.726462 
 127.180111 35.716444 251.945768 
 127.180222 35.716444 250.167407 
 127.180333 35.716444 248.471814 
 127.180444 35.716444 246.860943 
 127.179333 35.716556 266.488415 
 127.179444 35.716556 264.300241 
 127.179556 35.716556 262.157309 
 127.179667 35.716556 260.068012 
 127.179889 35.716556 256.063673 
 127.180111 35.716556 252.326774 
 127.180222 35.716556 250.570067 
 127.180333 35.716556 248.895978 
 127.180444 35.716556 247.306526 
 127.179444 35.716556 264.300241 
 127.179556 35.716556 262.157309 
 127.179667 35.716556 260.068012 
 127.179778 35.716556 258.034082 
 127.180000 35.716556 254.158620 
 127.180222 35.716556 250.570067 
 127.180333 35.716556 248.895978 
 127.180444 35.716556 247.306526 
 127.180556 35.716556 245.808745 
 127.179444 35.716667 264.558717 
 127.179556 35.716667 262.438835 
 127.179667 35.716667 260.372328 
 127.179778 35.716667 258.360972 
 127.180000 35.716667 254.530008 
 127.180222 35.716667 250.985249 
 127.180333 35.716667 249.332848 
 127.180444 35.716667 247.765007 
 127.180556 35.716667 246.288758 
 127.179444 35.716778 264.827792 
 127.179556 35.716778 262.731013 
 127.179667 35.716778 260.687353 
 127.179778 35.716778 258.698637 
 127.180000 35.716778 254.912323 
 127.180222 35.716778 251.411542 
 127.180333 35.716778 249.780934 
 127.180444 35.716778 248.234818 
 127.180556 35.716778 246.780227 
 127.179556 35.716778 262.731013 
 127.179667 35.716778 260.687353 
 127.179778 35.716778 258.698637 
 127.179889 35.716778 256.772980 
 127.180111 35.716778 253.124494 
 127.180333 35.716778 249.780934 
 127.180444 35.716778 248.234818 
 127.180556 35.716778 246.780227 
 127.180667 35.716778 245.419388 
 127.179556 35.716889 263.034881 
 127.179667 35.716889 261.014200 
 127.179778 35.716889 259.048262 
 127.179889 35.716889 257.145161 
 127.180111 35.716889 253.541276 
 127.180333 35.716889 250.241780 
 127.180444 35.716889 248.717576 
 127.180556 35.716889 247.284838 
 127.180667 35.716889 245.945861 
 127.179556 35.717000 263.349969 
 127.179667 35.717000 261.352355 
 127.179778 35.717000 259.409289 
 127.179889 35.717000 257.528845 
 127.180111 35.717000 253.969787 
 127.180333 35.717000 250.714617 
 127.180444 35.717000 249.212471 
 127.180556 35.717000 247.801740 
 127.180667 35.717000 246.484792 
 127.179556 35.717111 263.675718 
 127.179667 35.717111 261.701214 
 127.179778 35.717111 259.781069 
 127.179889 35.717111 257.923340 
 127.180111 35.717111 254.409250 
 127.180333 35.717111 251.198583 
 127.180444 35.717111 249.718599 
 127.180556 35.717111 248.329990 
 127.180667 35.717111 247.035195 
 127.179667 35.717111 261.701214 
 127.179778 35.717111 259.781069 
 127.179889 35.717111 257.923340 
 127.180000 35.717111 256.130137 
 127.180222 35.717111 252.762916 
 127.180444 35.717111 249.718599 
 127.180556 35.717111 248.329990 
 127.180667 35.717111 247.035195 
 127.180778 35.717111 245.840740 
 127.179667 35.717222 262.061974 
 127.179778 35.717222 260.164873 
 127.179889 35.717222 258.329990 
 127.180000 35.717222 256.559491 
 127.180222 35.717222 253.237284 
 127.180444 35.717222 250.237671 
 127.180556 35.717222 248.871372 
 127.180667 35.717222 247.598928 
 127.180778 35.717222 246.426867 
 127.179667 35.717333 262.433381 
 127.179778 35.717333 260.559365 
 127.179889 35.717333 258.747376 
 127.180000 35.717333 256.999638 
 127.180222 35.717333 253.722587 
 127.180444 35.717333 250.767863 
 127.180556 35.717333 249.423981 
 127.180667 35.717333 248.174007 
 127.180778 35.717333 247.024469 
 127.179667 35.717444 262.816689 
 127.179778 35.717444 260.965873 
 127.179889 35.717444 259.176900 
 127.180000 35.717444 257.452056 
 127.180222 35.717444 254.220451 
 127.180444 35.717444 251.310948 
 127.180556 35.717444 249.989666 
 127.180667 35.717444 248.762354 
 127.180778 35.717444 247.635543 
 127.179778 35.717444 260.965873 
 127.179889 35.717444 259.176900 
 127.180000 35.717444 257.452056 
 127.180111 35.717444 255.799097 
 127.180333 35.717444 252.723552 
 127.180556 35.717444 249.989666 
 127.180667 35.717444 248.762354 
 127.180778 35.717444 247.635543 
 127.180889 35.717444 246.611951 
 127.179778 35.717555 261.382959 
 127.179889 35.717555 259.617043 
 127.180000 35.717555 257.915140 
 127.180111 35.717555 256.285000 
 127.180333 35.717555 253.254906 
 127.180556 35.717555 250.566418 
 127.180667 35.717555 249.361881 
 127.180778 35.717555 248.257921 
 127.180889 35.717555 247.257327 
 127.179778 35.717667 261.812011 
 127.179889 35.717667 260.069266 
 127.180000 35.717667 258.390429 
 127.180111 35.717667 256.783240 
 127.180333 35.717667 253.798897 
 127.180556 35.717667 251.156151 
 127.180667 35.717667 249.974577 
 127.180778 35.717667 248.893666 
 127.180889 35.717667 247.916282 
 127.179889 35.717667 260.069266 
 127.180000 35.717667 258.390429 
 127.180111 35.717667 256.783240 
 127.180222 35.717667 255.250254 
 127.180444 35.717667 252.431854 
 127.180667 35.717667 249.974577 
 127.180778 35.717667 248.893666 
 127.180889 35.717667 247.916282 
 127.181000 35.717667 247.048371 
 127.179889 35.717778 260.531949 
 127.180000 35.717778 258.876220 
 127.180111 35.717778 257.292034 
 127.180222 35.717778 255.782013 
 127.180444 35.717778 253.009484 
 127.180667 35.717778 250.598251 
 127.180778 35.717778 249.540507 
 127.180889 35.717778 248.586461 
 127.181000 35.717778 247.742058 
 127.179889 35.717889 261.006612 
 127.180000 35.717889 259.374107 
 127.180111 35.717889 257.813052 
 127.180222 35.717889 256.326135 
 127.180444 35.717889 253.599786 
 127.180667 35.717889 251.234953 
 127.180778 35.717889 250.200572 
 127.180889 35.717889 249.270071 
 127.181000 35.717889 248.449393 
 127.179889 35.718000 261.492383 
 127.180000 35.718000 259.883177 
 127.180111 35.718000 258.345337 
 127.180222 35.718000 256.881619 
 127.180444 35.718000 254.201676 
 127.180667 35.718000 251.883516 
 127.180778 35.718000 250.872651 
 127.180889 35.718000 249.965859 
 127.181000 35.718000 249.169081 
 127.180000 35.718000 259.883177 
 127.180111 35.718000 258.345337 
 127.180222 35.718000 256.881619 
 127.180333 35.718000 255.499433 
 127.180556 35.718000 252.995368 
 127.180778 35.718000 250.872651 
 127.180889 35.718000 249.965859 
 127.181000 35.718000 249.169081 
 127.181111 35.718000 248.485437 
 127.180000 35.718111 260.402427 
 127.180111 35.718111 258.887845 
 127.180222 35.718111 257.447378 
 127.180333 35.718111 256.088436 
 127.180556 35.718111 253.631038 
 127.180778 35.718111 251.555442 
 127.180889 35.718111 250.672479 
 127.181000 35.718111 249.899734 
 127.181111 35.718111 249.240396 
 127.180000 35.718222 260.933537 
 127.180111 35.718222 259.442331 
 127.180222 35.718222 258.025247 
 127.180333 35.718222 256.689689 
 127.180556 35.718222 254.279277 
 127.180778 35.718222 252.251170 
 127.180889 35.718222 251.392237 
 127.181000 35.718222 250.643735 
 127.181111 35.718222 250.008925 
 127.180111 35.718222 259.442331 
 127.180222 35.718222 258.025247 
 127.180333 35.718222 256.689689 
 127.180444 35.718222 255.438694 
 127.180667 35.718222 253.214593 
 127.180889 35.718222 251.392237 
 127.181000 35.718222 250.643735 
 127.181111 35.718222 250.008925 
 127.181222 35.718222 249.493052 
 127.180111 35.718333 260.006770 
 127.180222 35.718333 258.613116 
 127.180333 35.718333 257.301001 
 127.180444 35.718333 256.073534 
 127.180667 35.718333 253.896811 
 127.180889 35.718333 252.122522 
 127.181000 35.718333 251.398389 
 127.181111 35.718333 250.788244 
 127.181222 35.718333 250.297323 
 127.180111 35.718444 260.582976 
 127.180222 35.718444 259.212876 
 127.180333 35.718444 257.924342 
 127.180444 35.718444 256.720553 
 127.180667 35.718444 254.591542 
 127.180889 35.718444 252.865701 
 127.181000 35.718444 252.166145 
 127.181111 35.718444 251.580882 
 127.181222 35.718444 251.115141 
 127.180111 35.718555 261.168830 
 127.180222 35.718555 259.822325 
 127.180333 35.718555 258.557425 
 127.180444 35.718555 257.377379 
 127.180667 35.718555 255.296248 
 127.180889 35.718555 253.619065 
 127.181000 35.718555 252.944208 
 127.181111 35.718555 252.383957 
 127.181222 35.718555 251.943535 
 127.180222 35.718555 259.822325 
 127.180333 35.718555 258.557425 
 127.180444 35.718555 257.377379 
 127.180556 35.718555 256.289197 
 127.180778 35.718555 254.405055 
 127.181000 35.718555 252.944208 
 127.181111 35.718555 252.383957 
 127.181222 35.718555 251.943535 
 127.181333 35.718555 251.626393 
 127.180222 35.718667 260.443411 
 127.180333 35.718667 259.202277 
 127.180444 35.718667 258.046120 
 127.180556 35.718667 256.981944 
 127.180778 35.718667 255.146387 
 127.181000 35.718667 253.735088 
 127.181111 35.718667 253.200064 
 127.181222 35.718667 252.785185 
 127.181333 35.718667 252.493969 
 127.180222 35.718778 261.074933 
 127.180333 35.718778 259.857656 
 127.180444 35.718778 258.725488 
 127.180556 35.718778 257.685434 
 127.180778 35.718778 255.898724 
 127.181000 35.718778 254.537281 
 127.181111 35.718778 254.027653 
 127.181222 35.718778 253.638494 
 127.181333 35.718778 253.373390 
 127.180333 35.718778 259.857656 
 127.180444 35.718778 258.725488 
 127.180556 35.718778 257.685434 
 127.180667 35.718778 256.741007 
 127.180889 35.718778 255.162177 
 127.181111 35.718778 254.027653 
 127.181222 35.718778 253.638494 
 127.181333 35.718778 253.373390 
 127.181444 35.718778 253.236713 
 127.180333 35.718889 260.522236 
 127.180444 35.718889 259.414117 
 127.180556 35.718889 258.398254 
 127.180667 35.718889 257.478234 
 127.180889 35.718889 255.948919 
 127.181111 35.718889 254.865086 
 127.181222 35.718889 254.501777 
 127.181333 35.718889 254.262922 
 127.181444 35.718889 254.152876 
 127.180333 35.719000 261.198126 
 127.180444 35.719000 260.114196 
 127.180556 35.719000 259.122675 
 127.180667 35.719000 258.227225 
 127.180889 35.719000 256.747788 
 127.181111 35.719000 255.715051 
 127.181222 35.719000 255.377809 
 127.181333 35.719000 255.165429 
 127.181444 35.719000 255.082245 
 127.180333 35.719111 261.882817 
 127.180444 35.719111 260.823128 
 127.180556 35.719111 259.856017 
 127.180667 35.719111 258.985214 
 127.180889 35.719111 257.555841 
 127.181111 35.719111 256.574424 
 127.181222 35.719111 256.263374 
 127.181333 35.719111 256.077599 
 127.181444 35.719111 256.021413 
 127.180444 35.719111 260.823128 
 127.180556 35.719111 259.856017 
 127.180667 35.719111 258.985214 
 127.180778 35.719111 258.217220 
 127.181000 35.719111 257.006967 
 127.181222 35.719111 256.263374 
 127.181333 35.719111 256.077599 
 127.181444 35.719111 256.021413 
 127.181556 35.719111 256.098491 
 127.180444 35.719222 261.543158 
 127.180556 35.719222 260.600603 
 127.180667 35.719222 259.754607 
 127.180778 35.719222 259.011665 
 127.181000 35.719222 257.852451 
 127.181222 35.719222 257.161306 
 127.181333 35.719222 257.002355 
 127.181444 35.719222 256.973394 
 127.181556 35.719222 257.078156 
 127.180444 35.719333 262.271603 
 127.180556 35.719333 261.353667 
 127.180667 35.719333 260.532552 
 127.180778 35.719333 259.814745 
 127.181000 35.719333 258.706765 
 127.181222 35.719333 258.068296 
 127.181333 35.719333 257.936295 
 127.181444 35.719333 257.934687 
 127.181556 35.719333 258.067265 
 127.180556 35.719444 262.117585 
 127.180667 35.719444 261.321506 
 127.180778 35.719444 260.629003 
 127.180889 35.719444 260.044090 
 127.181111 35.719444 259.218637 
 127.181333 35.719444 258.882399 
 127.181444 35.719444 258.908365 
 127.181556 35.719444 259.068984 
 127.181667 35.719444 259.367510 
 127.180556 35.719556 262.890845 
 127.180667 35.719556 262.119916 
 127.180778 35.719556 261.452838 
 127.180889 35.719556 260.893697 
 127.181111 35.719556 260.120854 
 127.181333 35.719556 259.838828 
 127.181444 35.719556 259.892536 
 127.181556 35.719556 260.081369 
 127.181667 35.719556 260.408545 
 127.180556 35.719667 263.671866 
 127.180667 35.719667 262.926151 
 127.180778 35.719667 262.284575 
 127.180889 35.719667 261.751291 
 127.181111 35.719667 261.031255 
 127.181333 35.719667 260.803663 
 127.181444 35.719667 260.885231 
 127.181556 35.719667 261.102398 
 127.181667 35.719667 261.458345 
 127.180667 35.719667 262.926151 
 127.180778 35.719667 262.284575 
 127.180889 35.719667 261.751291 
 127.181000 35.719667 261.332132 
 127.181222 35.719667 260.853734 
 127.181444 35.719667 260.885231 
 127.181556 35.719667 261.102398 
 127.181667 35.719667 261.458345 
 127.181778 35.719667 261.956822 
 127.180667 35.719778 263.742746 
 127.180778 35.719778 263.126835 
 127.180889 35.719778 262.619582 
 127.181000 35.719778 262.226804 
 127.181222 35.719778 261.802394 
 127.181444 35.719778 261.889606 
 127.181556 35.719778 262.135320 
 127.181667 35.719778 262.520253 
 127.181778 35.719778 263.048203 
 127.180667 35.719889 264.566650 
 127.180778 35.719889 263.976474 
 127.180889 35.719889 263.495333 
 127.181000 35.719889 263.129025 
 127.181222 35.719889 262.758801 
 127.181444 35.719889 262.901942 
 127.181556 35.719889 263.176315 
 127.181667 35.719889 263.590346 
 127.181778 35.719889 264.147878 
 127.180778 35.720000 264.836162 
 127.180889 35.720000 264.381300 
 127.181000 35.720000 264.041640 
 127.181111 35.720000 263.821532 
 127.181333 35.720000 263.759253 
 127.181556 35.720000 264.228686 
 127.181667 35.720000 264.672021 
 127.181778 35.720000 265.259342 
 127.181889 35.720000 265.992549 
 127.180778 35.720111 265.702682 
 127.180889 35.720111 265.274175 
 127.181000 35.720111 264.961245 
 127.181111 35.720111 264.768304 
 127.181333 35.720111 264.761652 
 127.181556 35.720111 265.288532 
 127.181667 35.720111 265.761272 
 127.181778 35.720111 266.378480 
 127.181889 35.720111 267.142003 
 127.180778 35.720222 266.578748 
 127.180889 35.720222 266.176759 
 127.181000 35.720222 265.890732 
 127.181111 35.720222 265.725138 
 127.181333 35.720222 265.774489 
 127.181556 35.720222 266.359206 
 127.181667 35.720222 266.861548 
 127.181778 35.720222 267.508841 
 127.181889 35.720222 268.302872 
 127.180889 35.720222 266.176759 
 127.181000 35.720222 265.890732 
 127.181111 35.720222 265.725138 
 127.181222 35.720222 265.684929 
 127.181444 35.720222 265.997842 
 127.181667 35.720222 266.861548 
 127.181778 35.720222 267.508841 
 127.181889 35.720222 268.302872 
 127.182000 35.720222 269.247292 
 127.180889 35.720333 267.085674 
 127.181000 35.720333 266.826626 
 127.181111 35.720333 266.688462 
 127.181222 35.720333 266.676105 
 127.181444 35.720333 267.046113 
 127.181667 35.720333 267.968764 
 127.181778 35.720333 268.646228 
 127.181889 35.720333 269.470851 
 127.182000 35.720333 270.446313 
 127.180889 35.720444 268.003764 
 127.181000 35.720444 267.771862 
 127.181111 35.720444 267.661302 
 127.181222 35.720444 267.676976 
 127.181444 35.720444 268.104448 
 127.181667 35.720444 269.086420 
 127.181778 35.720444 269.794240 
 127.181889 35.720444 270.649636 
 127.182000 35.720444 271.656317 
 127.180889 35.720556 268.929182 
 127.181000 35.720556 268.724544 
 127.181111 35.720556 268.641710 
 127.181222 35.720556 268.685543 
 127.181444 35.720556 269.170743 
 127.181667 35.720556 270.212298 
 127.181778 35.720556 270.950602 
 127.181889 35.720556 271.836892 
 127.182000 35.720556 272.874908 
 127.181000 35.720556 268.724544 
 127.181111 35.720556 268.641710 
 127.181222 35.720556 268.685543 
 127.181333 35.720556 268.860584 
 127.181556 35.720556 269.620374 
 127.181778 35.720556 270.950602 
 127.181889 35.720556 271.836892 
 127.182000 35.720556 272.874908 
 127.182111 35.720556 274.064928 
 127.181000 35.720667 269.682717 
 127.181111 35.720667 269.627682 
 127.181222 35.720667 269.699748 
 127.181333 35.720667 269.903509 
 127.181556 35.720667 270.722110 
 127.181778 35.720667 272.112973 
 127.181889 35.720667 273.030221 
 127.182000 35.720667 274.099626 
 127.182111 35.720667 275.321391 
 127.181000 35.720778 270.649377 
 127.181111 35.720778 270.622305 
 127.181222 35.720778 270.722773 
 127.181333 35.720778 270.955424 
 127.181556 35.720778 271.833183 
 127.181778 35.720778 273.285020 
 127.181889 35.720778 274.233387 
 127.182000 35.720778 275.334336 
 127.182111 35.720778 276.587992 
 127.181111 35.720778 270.622305 
 127.181222 35.720778 270.722773 
 127.181333 35.720778 270.955424 
 127.181444 35.720778 271.324080 
 127.181667 35.720778 272.485443 
 127.181889 35.720778 274.233387 
 127.182000 35.720778 275.334336 
 127.182111 35.720778 276.587992 
 127.182222 35.720778 277.997700 
 127.181111 35.720889 271.621849 
 127.181222 35.720889 271.750785 
 127.181333 35.720889 272.012396 
 127.181444 35.720889 272.410454 
 127.181667 35.720889 273.632018 
 127.181889 35.720889 275.441906 
 127.182000 35.720889 276.574439 
 127.182111 35.720889 277.860014 
 127.182222 35.720889 279.301991 
 127.181111 35.721000 272.629438 
 127.181222 35.721000 272.787004 
 127.181333 35.721000 273.077735 
 127.181444 35.721000 273.505359 
 127.181667 35.721000 274.787447 
 127.181889 35.721000 276.659582 
 127.182000 35.721000 277.823839 
 127.182111 35.721000 279.141465 
 127.182222 35.721000 280.615831 
 127.181222 35.721000 272.787004 
 127.181333 35.721000 273.077735 
 127.181444 35.721000 273.505359 
 127.181556 35.721000 274.074398 
 127.181778 35.721000 275.648730 
 127.182000 35.721000 277.823839 
 127.182111 35.721000 279.141465 
 127.182222 35.721000 280.615831 
 127.182333 35.721000 282.245425 
 127.181222 35.721111 273.827542 
 127.181333 35.721111 274.147453 
 127.181444 35.721111 274.604698 
 127.181556 35.721111 275.203840 
 127.181778 35.721111 276.839667 
 127.182000 35.721111 279.077876 
 127.182111 35.721111 280.427564 
 127.182222 35.721111 281.934317 
 127.182333 35.721111 283.596527 
 127.181222 35.721222 274.875650 
 127.181333 35.721222 275.224895 
 127.181444 35.721222 275.711916 
 127.181556 35.721222 276.341311 
 127.181778 35.721222 278.038924 
 127.182000 35.721222 280.340490 
 127.182111 35.721222 281.722355 
 127.182222 35.721222 283.261597 
 127.182333 35.721222 284.956510 
 127.181222 35.721333 275.929209 
 127.181333 35.721333 276.307885 
 127.181444 35.721333 276.824778 
 127.181556 35.721333 277.484521 
 127.181778 35.721333 279.244089 
 127.182000 35.721333 281.609150 
 127.182111 35.721333 283.023243 
 127.182222 35.721333 284.595010 
 127.182333 35.721333 286.322646 
 127.181333 35.721333 276.307885 
 127.181444 35.721333 276.824778 
 127.181556 35.721333 277.484521 
 127.181667 35.721333 278.289523 
 127.181889 35.721333 280.349334 
 127.182111 35.721333 283.023243 
 127.182222 35.721333 284.595010 
 127.182333 35.721333 286.322646 
 127.182444 35.721333 288.208983 
 127.181333 35.721444 277.394205 
 127.181444 35.721444 277.941011 
 127.181556 35.721444 278.631137 
 127.181667 35.721444 279.466926 
 127.181889 35.721444 281.589523 
 127.182111 35.721444 284.327582 
 127.182222 35.721444 285.931846 
 127.182333 35.721444 287.692161 
 127.182444 35.721444 289.611354 
 127.181333 35.721556 278.487247 
 127.181444 35.721556 279.064102 
 127.181556 35.721556 279.784745 
 127.181667 35.721556 280.651450 
 127.181889 35.721556 282.837066 
 127.182111 35.721556 285.639465 
 127.182222 35.721556 287.276300 
 127.182333 35.721556 289.069351 
 127.182444 35.721556 291.021440 
 127.181444 35.721556 279.064102 
 127.181556 35.721556 279.784745 
 127.181667 35.721556 280.651450 
 127.181778 35.721556 281.668571 
 127.182000 35.721556 284.160856 
 127.182222 35.721556 287.276300 
 127.182333 35.721556 289.069351 
 127.182444 35.721556 291.021440 
 127.182556 35.721556 293.128947 
 127.181444 35.721667 280.189836 
 127.181556 35.721667 280.941018 
 127.181667 35.721667 281.838654 
 127.181778 35.721667 282.887120 
 127.182000 35.721667 285.443101 
 127.182222 35.721667 288.623340 
 127.182333 35.721667 290.449063 
 127.182444 35.721667 292.433964 
 127.182556 35.721667 294.574307 
 127.181444 35.721778 281.321727 
 127.181556 35.721778 282.103569 
 127.181667 35.721778 283.032251 
 127.181778 35.721778 284.112168 
 127.182000 35.721778 286.732027 
 127.182222 35.721778 289.977186 
 127.182333 35.721778 291.835620 
 127.182444 35.721778 293.853351 
 127.182556 35.721778 296.026527 
 127.181444 35.721889 282.455522 
 127.181556 35.721889 283.268034 
 127.181667 35.721889 284.227763 
 127.181778 35.721889 285.339122 
 127.182000 35.721889 288.022804 
 127.182222 35.721889 291.332767 
 127.182333 35.721889 293.223826 
 127.182444 35.721889 295.274282 
 127.182556 35.721889 297.480167 
 127.181556 35.721889 283.268034 
 127.181667 35.721889 284.227763 
 127.181778 35.721889 285.339122 
 127.181889 35.721889 286.602818 
 127.182111 35.721889 289.598317 
 127.182333 35.721889 293.223826 
 127.182444 35.721889 295.274282 
 127.182556 35.721889 297.480167 
 127.182667 35.721889 299.843586 
 127.181556 35.722000 284.438047 
 127.181667 35.722000 285.428923 
 127.181778 35.722000 286.571816 
 127.181889 35.722000 287.867344 
 127.182111 35.722000 290.927326 
 127.182333 35.722000 294.618025 
 127.182444 35.722000 296.701205 
 127.182556 35.722000 298.939772 
 127.182667 35.722000 301.335812 
 127.181556 35.722111 285.609211 
 127.181667 35.722111 286.631222 
 127.181778 35.722111 287.805623 
 127.181889 35.722111 289.132946 
 127.182111 35.722111 292.257290 
 127.182333 35.722111 296.012989 
 127.182444 35.722111 298.128766 
 127.182556 35.722111 300.399868 
 127.182667 35.722111 302.828356 
 127.181667 35.722111 286.631222 
 127.181778 35.722111 287.805623 
 127.181889 35.722111 289.132946 
 127.182000 35.722111 290.617155 
 127.182222 35.722111 294.056751 
 127.182444 35.722111 298.128766 
 127.182556 35.722111 300.399868 
 127.182667 35.722111 302.828356 
 127.182778 35.722111 305.408307 
 127.181667 35.722222 287.838410 
 127.181778 35.722222 289.044396 
 127.181889 35.722222 290.403577 
 127.182000 35.722222 291.919922 
 127.182222 35.722222 295.424307 
 127.182444 35.722222 299.561427 
 127.182556 35.722222 301.865017 
 127.182667 35.722222 304.325882 
 127.182778 35.722222 306.937967 
 127.181667 35.722333 289.048033 
 127.181778 35.722333 290.285616 
 127.181889 35.722333 291.676656 
 127.182000 35.722333 293.225121 
 127.182222 35.722333 296.794213 
 127.182444 35.722333 300.996278 
 127.182556 35.722333 303.332241 
 127.182667 35.722333 305.825344 
 127.182778 35.722333 308.469397 
 127.181667 35.722444 290.257614 
 127.181778 35.722444 291.526746 
 127.181889 35.722444 292.949581 
 127.182000 35.722444 294.530087 
 127.182222 35.722444 298.163675 
 127.182444 35.722444 302.430390 
 127.182556 35.722444 304.798545 
 127.182667 35.722444 307.323679 
 127.182778 35.722444 309.999469 
 127.181778 35.722444 291.526746 
 127.181889 35.722444 292.949581 
 127.182000 35.722444 294.530087 
 127.182111 35.722444 296.266993 
 127.182333 35.722444 300.217237 
 127.182556 35.722444 304.798545 
 127.182667 35.722444 307.323679 
 127.182778 35.722444 309.999469 
 127.182889 35.722444 312.827108 
 127.181778 35.722556 292.771656 
 127.181889 35.722556 294.226324 
 127.182000 35.722556 295.838894 
 127.182111 35.722556 297.607986 
 127.182333 35.722556 301.622821 
 127.182556 35.722556 306.268503 
 127.182667 35.722556 308.825561 
 127.182778 35.722556 311.532953 
 127.182889 35.722556 314.391834 
 127.181778 35.722667 294.015667 
 127.181889 35.722667 295.502087 
 127.182000 35.722667 297.146622 
 127.182111 35.722667 298.947785 
 127.182333 35.722667 303.026918 
 127.182556 35.722667 307.736591 
 127.182667 35.722667 310.325344 
 127.182778 35.722667 313.064084 
 127.182889 35.722667 315.953924 
 127.181889 35.722667 295.502087 
 127.182000 35.722667 297.146622 
 127.182111 35.722667 298.947785 
 127.182222 35.722667 300.908928 
 127.182444 35.722667 305.304420 
 127.182667 35.722667 310.325344 
 127.182778 35.722667 313.064084 
 127.182889 35.722667 315.953924 
 127.183000 35.722667 318.986507 
 127.181889 35.722778 296.780847 
 127.182000 35.722778 298.457352 
 127.182111 35.722778 300.290570 
 127.182222 35.722778 302.283840 
 127.182444 35.722778 306.743415 
 127.182667 35.722778 311.827703 
 127.182778 35.722778 314.597633 
 127.182889 35.722778 317.518244 
 127.183000 35.722778 320.581036 
 127.181889 35.722889 298.057798 
 127.182000 35.722889 299.766155 
 127.182111 35.722889 301.631293 
 127.182222 35.722889 303.656534 
 127.182444 35.722889 308.179812 
 127.182667 35.722889 313.326988 
 127.182778 35.722889 316.127828 
 127.182889 35.722889 319.078905 
 127.183000 35.722889 322.171573 
 127.181889 35.723000 299.336918 
 127.182000 35.723000 301.077111 
 127.182111 35.723000 302.974135 
 127.182222 35.723000 305.031290 
 127.182444 35.723000 309.618089 
 127.182667 35.723000 314.827870 
 127.182778 35.723000 317.659437 
 127.182889 35.723000 320.640766 
 127.183000 35.723000 323.763068 
 127.182000 35.723000 301.077111 
 127.182111 35.723000 302.974135 
 127.182222 35.723000 305.031290 
 127.182333 35.723000 307.245080 
 127.182556 35.723000 312.145084 
 127.182778 35.723000 317.659437 
 127.182889 35.723000 320.640766 
 127.183000 35.723000 323.763068 
 127.183111 35.723000 327.026462 
 127.182000 35.723111 302.387543 
 127.182111 35.723111 304.316351 
 127.182222 35.723111 306.405298 
 127.182333 35.723111 308.650765 
 127.182556 35.723111 313.613553 
 127.182778 35.723111 319.189321 
 127.182889 35.723111 322.200624 
 127.183000 35.723111 325.352252 
 127.183111 35.723111 328.644270 
 127.182000 35.723222 303.694774 
 127.182111 35.723222 305.655201 
 127.182222 35.723222 307.775755 
 127.182333 35.723222 310.052689 
 127.182556 35.723222 315.077768 
 127.182778 35.723222 320.714353 
 127.182889 35.723222 323.755291 
 127.183000 35.723222 326.935877 
 127.183111 35.723222 330.256121 
 127.182111 35.723222 305.655201 
 127.182222 35.723222 307.775755 
 127.182333 35.723222 310.052689 
 127.182444 35.723222 312.488527 
 127.182667 35.723222 317.822139 
 127.182889 35.723222 323.755291 
 127.183000 35.723222 326.935877 
 127.183111 35.723222 330.256121 
 127.183222 35.723222 333.705187 
 127.182111 35.723333 306.994859 
 127.182222 35.723333 309.146930 
 127.182333 35.723333 311.455219 
 127.182444 35.723333 313.922218 
 127.182667 35.723333 319.317120 
 127.182889 35.723333 325.309604 
 127.183000 35.723333 328.518867 
 127.183111 35.723333 331.867024 
 127.183222 35.723333 335.343091 
 127.182111 35.723444 308.330286 
 127.182222 35.723444 310.513668 
 127.182333 35.723444 312.853081 
 127.182444 35.723444 315.350985 
 127.182667 35.723444 320.806589 
 127.182889 35.723444 326.857708 
 127.183000 35.723444 330.095258 
 127.183111 35.723444 333.470909 
 127.183222 35.723444 336.973528 
 127.182222 35.723444 310.513668 
 127.182333 35.723444 312.853081 
 127.182444 35.723444 315.350985 
 127.182556 35.723444 318.001606 
 127.182778 35.723444 323.758361 
 127.183000 35.723444 330.095258 
 127.183111 35.723444 333.470909 
 127.183222 35.723444 336.973528 
 127.183333 35.723444 340.602113 
 127.182222 35.723556 311.880226 
 127.182333 35.723556 314.250631 
 127.182444 35.723556 316.779279 
 127.182556 35.723556 319.460264 
 127.182778 35.723556 325.276325 
 127.183000 35.723556 331.669952 
 127.183111 35.723556 335.072759 
 127.183222 35.723556 338.601563 
 127.183333 35.723556 342.255295 
 127.182222 35.723667 313.241465 
 127.182333 35.723667 315.642610 
 127.182444 35.723667 318.201727 
 127.182556 35.723667 320.912773 
 127.182778 35.723667 326.787455 
 127.183000 35.723667 333.237016 
 127.183111 35.723667 336.666538 
 127.183222 35.723667 340.221057 
 127.183333 35.723667 343.899436 
 127.182222 35.723778 314.601628 
 127.182333 35.723778 317.033356 
 127.182444 35.723778 319.622760 
 127.182556 35.723778 322.363658 
 127.182778 35.723778 328.296454 
 127.183000 35.723778 334.801323 
 127.183111 35.723778 338.257200 
 127.183222 35.723778 341.837041 
 127.183333 35.723778 345.539644 
 127.182333 35.723778 317.033356 
 127.182444 35.723778 319.622760 
 127.182556 35.723778 322.363658 
 127.182667 35.723778 325.257555 
 127.182889 35.723778 331.480979 
 127.183111 35.723778 338.257200 
 127.183222 35.723778 341.837041 
 127.183333 35.723778 345.539644 
 127.183444 35.723778 349.351751 
 127.182333 35.723889 318.420018 
 127.182444 35.723889 321.039463 
 127.182556 35.723889 323.809940 
 127.182667 35.723889 326.732907 
 127.182889 35.723889 333.012455 
 127.183111 35.723889 339.841468 
 127.183222 35.723889 343.446184 
 127.183333 35.723889 347.172531 
 127.183444 35.723889 351.007109 
 127.182333 35.724000 319.799774 
 127.182444 35.724000 322.448952 
 127.182556 35.724000 325.248675 
 127.182667 35.724000 328.200351 
 127.182889 35.724000 334.535220 
 127.183111 35.724000 341.416109 
 127.183222 35.724000 345.045201 
 127.183333 35.724000 348.794765 
 127.183444 35.724000 352.651260 
 127.182444 35.724000 322.448952 
 127.182556 35.724000 325.248675 
 127.182667 35.724000 328.200351 
 127.182778 35.724000 331.295696 
 127.183000 35.724000 337.908828 
 127.183222 35.724000 345.045201 
 127.183333 35.724000 348.794765 
 127.183444 35.724000 352.651260 
 127.183556 35.724000 356.612431 
 127.182444 35.724111 323.855621 
 127.182556 35.724111 326.684346 
 127.182667 35.724111 329.664459 
 127.182778 35.724111 332.787531 
 127.183000 35.724111 339.453671 
 127.183222 35.724111 346.639064 
 127.183333 35.724111 350.411388 
 127.183444 35.724111 354.289309 
 127.183556 35.724111 358.270503 
 127.182444 35.724222 325.254181 
 127.182556 35.724222 328.111555 
 127.182667 35.724222 331.119723 
 127.182778 35.724222 334.270114 
 127.183000 35.724222 340.988363 
 127.183222 35.724222 348.221768 
 127.183333 35.724222 352.016307 
 127.183444 35.724222 355.915083 
 127.183556 35.724222 359.915700 
 127.182556 35.724333 329.534750 
 127.182667 35.724333 332.570680 
 127.182778 35.724333 335.748066 
 127.182889 35.724333 339.067246 
 127.183111 35.724333 346.098781 
 127.183333 35.724333 353.614513 
 127.183444 35.724333 357.533635 
 127.183556 35.724333 361.553136 
 127.183667 35.724333 365.657503 
 127.182556 35.724444 330.948583 
 127.182667 35.724444 334.011874 
 127.182778 35.724444 337.215829 
 127.182889 35.724444 340.560723 
 127.183111 35.724444 347.640633 
 127.183333 35.724444 355.199988 
 127.183444 35.724444 359.138869 
 127.183556 35.724444 363.176641 
 127.183667 35.724444 367.297658 
 127.182556 35.724556 332.357464 
 127.182667 35.724556 335.447800 
 127.182778 35.724556 338.677979 
 127.182889 35.724556 342.048213 
 127.183111 35.724556 349.175654 
 127.183333 35.724556 356.777667 
 127.183444 35.724556 360.735780 
 127.183556 35.724556 364.791265 
 127.183667 35.724556 368.928346 
 127.182667 35.724556 335.447800 
 127.182778 35.724556 338.677979 
 127.182889 35.724556 342.048213 
 127.183000 35.724556 345.547684 
 127.183222 35.724556 352.919544 
 127.183444 35.724556 360.735780 
 127.183556 35.724556 364.791265 
 127.183667 35.724556 368.928346 
 127.183778 35.724556 373.143513 
 127.182667 35.724667 336.873065 
 127.182778 35.724667 340.129021 
 127.182889 35.724667 343.524123 
 127.183000 35.724667 347.047408 
 127.183222 35.724667 354.463394 
 127.183444 35.724667 362.318359 
 127.183556 35.724667 366.390931 
 127.183667 35.724667 370.543428 
 127.183778 35.724667 374.772264 
 127.182667 35.724778 338.292118 
 127.182778 35.724778 341.573486 
 127.182889 35.724778 344.993060 
 127.183000 35.724778 348.539734 
 127.183222 35.724778 355.998903 
 127.183444 35.724778 363.891537 
 127.183556 35.724778 367.980622 
 127.183667 35.724778 372.147934 
 127.183778 35.724778 376.389809 
 127.182778 35.724778 341.573486 
 127.182889 35.724778 344.993060 
 127.183000 35.724778 348.539734 
 127.183111 35.724778 352.212634 
 127.183333 35.724778 359.896708 
 127.183556 35.724778 367.980622 
 127.183667 35.724778 372.147934 
 127.183778 35.724778 376.389809 
 127.183889 35.724778 380.688873 
 127.182778 35.724889 343.008408 
 127.182889 35.724889 346.452005 
 127.183000 35.724889 350.021592 
 127.183111 35.724889 353.716226 
 127.183333 35.724889 361.439740 
 127.183556 35.724889 369.557059 
 127.183667 35.724889 373.738552 
 127.183778 35.724889 377.992809 
 127.183889 35.724889 382.302342 
 127.182778 35.725000 344.430892 
 127.182889 35.725000 347.898016 
 127.183000 35.725000 351.489993 
 127.183111 35.725000 355.205813 
 127.183333 35.725000 362.967599 
 127.183556 35.725000 371.117063 
 127.183667 35.725000 375.312074 
 127.183778 35.725000 379.578031 
 127.183889 35.725000 383.897332 
 127.182778 35.725111 345.845387 
 127.182889 35.725111 349.335613 
 127.183000 35.725111 352.949528 
 127.183111 35.725111 356.686051 
 127.183333 35.725111 364.485059 
 127.183556 35.725111 372.665506 
 127.183667 35.725111 376.873415 
 127.183778 35.725111 381.150426 
 127.183889 35.725111 385.478827 
 127.182889 35.725111 349.335613 
 127.183000 35.725111 352.949528 
 127.183111 35.725111 356.686051 
 127.183222 35.725111 360.531911 
 127.183444 35.725111 368.530588 
 127.183667 35.725111 376.873415 
 127.183778 35.725111 381.150426 
 127.183889 35.725111 385.478827 
 127.184000 35.725111 389.853895 
 127.182889 35.725222 350.759409 
 127.183000 35.725222 354.394725 
 127.183111 35.725222 358.151391 
 127.183222 35.725222 362.015999 
 127.183444 35.725222 370.047645 
 127.183667 35.725222 378.416720 
 127.183778 35.725222 382.704097 
 127.183889 35.725222 387.040894 
 127.184000 35.725222 391.422315 
 127.182889 35.725333 352.173863 
 127.183000 35.725333 355.830111 
 127.183111 35.725333 359.606420 
 127.183222 35.725333 363.489251 
 127.183444 35.725333 371.552732 
 127.183667 35.725333 379.946818 
 127.183778 35.725333 384.243907 
 127.183889 35.725333 388.588425 
 127.184000 35.725333 392.975500 
 127.183000 35.725333 355.830111 
 127.183111 35.725333 359.606420 
 127.183222 35.725333 363.489251 
 127.183333 35.725333 367.476409 
 127.183556 35.725333 375.715080 
 127.183778 35.725333 384.243907 
 127.183889 35.725333 388.588425 
 127.184000 35.725333 392.975500 
 127.184111 35.725333 397.386135 
 127.183000 35.725444 357.250312 
 127.183111 35.725444 361.045693 
 127.183222 35.725444 364.946152 
 127.183333 35.725444 368.949421 
 127.183556 35.725444 377.215318 
 127.183778 35.725444 385.764094 
 127.183889 35.725444 390.115627 
 127.184000 35.725444 394.507639 
 127.184111 35.725444 398.921045 
 127.183000 35.725556 358.659784 
 127.183111 35.725556 362.473724 
 127.183222 35.725556 366.391272 
 127.183333 35.725556 370.410087 
 127.183556 35.725556 378.702005 
 127.183778 35.725556 387.269428 
 127.183889 35.725556 391.627297 
 127.184000 35.725556 396.023544 
 127.184111 35.725556 400.439002 
 127.183111 35.725556 362.473724 
 127.183222 35.725556 366.391272 
 127.183333 35.725556 370.410087 
 127.183444 35.725556 374.514762 
 127.183667 35.725556 382.954956 
 127.183889 35.725556 391.627297 
 127.184000 35.725556 396.023544 
 127.184111 35.725556 400.439002 
 127.184222 35.725556 404.867912 
 127.183111 35.725667 363.887596 
 127.183222 35.725667 367.821657 
 127.183333 35.725667 371.855420 
 127.183444 35.725667 375.973355 
 127.183667 35.725667 384.434676 
 127.183889 35.725667 393.120340 
 127.184000 35.725667 397.520114 
 127.184111 35.725667 401.936903 
 127.184222 35.725667 406.364880 
 127.183111 35.725778 365.284496 
 127.183222 35.725778 369.234465 
 127.183333 35.725778 373.282549 
 127.183444 35.725778 377.413099 
 127.183667 35.725778 385.894209 
 127.183889 35.725778 394.591804 
 127.184000 35.725778 398.994393 
 127.184111 35.725778 403.411794 
 127.184222 35.725778 407.838110 
 127.183111 35.725889 366.668824 
 127.183222 35.725889 370.634144 
 127.183333 35.725889 374.695968 
 127.183444 35.725889 378.838531 
 127.183667 35.725889 387.338157 
 127.183889 35.725889 396.046333 
 127.184000 35.725889 400.451036 
 127.184111 35.725889 404.868333 
 127.184222 35.725889 409.292263 
 127.183222 35.725889 370.634144 
 127.183333 35.725889 374.695968 
 127.183444 35.725889 378.838531 
 127.183556 35.725889 383.058322 
 127.183778 35.725889 391.673630 
 127.184000 35.725889 400.451036 
 127.184111 35.725889 404.868333 
 127.184222 35.725889 409.292263 
 127.184333 35.725889 413.706128 
 127.183222 35.726000 372.015484 
 127.183333 35.726000 376.090417 
 127.183444 35.726000 380.244345 
 127.183556 35.726000 384.473685 
 127.183778 35.726000 393.102261 
 127.184000 35.726000 401.884632 
 127.184111 35.726000 406.301117 
 127.184222 35.726000 410.721944 
 127.184333 35.726000 415.130359 
 127.183222 35.726111 373.382846 
 127.183333 35.726111 377.470300 
 127.183444 35.726111 381.634985 
 127.183556 35.726111 385.873243 
 127.183778 35.726111 394.513770 
 127.184000 35.726111 403.299728 
 127.184111 35.726111 407.714690 
 127.184222 35.726111 412.131695 
 127.184333 35.726111 416.533931 
 127.183333 35.726111 377.470300 
 127.183444 35.726111 381.634985 
 127.183556 35.726111 385.873243 
 127.183667 35.726111 390.167688 
 127.183889 35.726111 398.892907 
 127.184111 35.726111 407.714690 
 127.184222 35.726111 412.131695 
 127.184333 35.726111 416.533931 
 127.184444 35.726111 420.904363 
 127.183333 35.726222 378.830497 
 127.183444 35.726222 383.005290 
 127.183556 35.726222 387.251805 
 127.183667 35.726222 391.552558 
 127.183889 35.726222 400.284250 
 127.184111 35.726222 409.103826 
 127.184222 35.726222 413.516308 
 127.184333 35.726222 417.911666 
 127.184444 35.726222 422.272823 
 127.183333 35.726333 380.175319 
 127.183444 35.726333 384.359607 
 127.183556 35.726333 388.613747 
 127.183667 35.726333 392.920158 
 127.183889 35.726333 401.656980 
 127.184111 35.726333 410.472956 
 127.184222 35.726333 414.880204 
 127.184333 35.726333 419.267967 
 127.184444 35.726333 423.619131 
 127.183444 35.726333 384.359607 
 127.183556 35.726333 388.613747 
 127.183667 35.726333 392.920158 
 127.183778 35.726333 397.274151 
 127.184000 35.726333 406.063140 
 127.184222 35.726333 414.880204 
 127.184333 35.726333 419.267967 
 127.184444 35.726333 423.619131 
 127.184556 35.726333 427.926601 
 127.183444 35.726445 385.695206 
 127.183556 35.726445 389.956323 
 127.183667 35.726445 394.267734 
 127.183778 35.726445 398.624679 
 127.184000 35.726445 407.413131 
 127.184222 35.726445 416.220651 
 127.184333 35.726445 420.600123 
 127.184444 35.726445 424.940599 
 127.184556 35.726445 429.234930 
 127.183444 35.726556 387.009497 
 127.183556 35.726556 391.276936 
 127.183667 35.726556 395.592684 
 127.183778 35.726556 399.951910 
 127.184000 35.726556 408.738473 
 127.184222 35.726556 417.535096 
 127.184333 35.726556 421.905607 
 127.184444 35.726556 426.234731 
 127.184556 35.726556 430.515268 
 127.183444 35.726667 388.306675 
 127.183556 35.726667 392.579806 
 127.183667 35.726667 396.899244 
 127.183778 35.726667 401.260093 
 127.184000 35.726667 410.043420 
 127.184222 35.726667 418.827772 
 127.184333 35.726667 423.188630 
 127.184444 35.726667 427.505711 
 127.184556 35.726667 431.771765 
 127.183556 35.726667 392.579806 
 127.183667 35.726667 396.899244 
 127.183778 35.726667 401.260093 
 127.183889 35.726667 405.643385 
 127.184111 35.726667 414.440351 
 127.184333 35.726667 423.188630 
 127.184444 35.726667 427.505711 
 127.184556 35.726667 431.771765 
 127.184667 35.726667 435.965963 
 127.183556 35.726778 393.860144 
 127.183667 35.726778 398.182618 
 127.183778 35.726778 402.544430 
 127.183889 35.726778 406.926545 
 127.184111 35.726778 415.714493 
 127.184333 35.726778 424.444520 
 127.184444 35.726778 428.748921 
 127.184556 35.726778 432.999865 
 127.184667 35.726778 437.176523 
 127.183556 35.726889 395.122061 
 127.183667 35.726889 399.446932 
 127.183778 35.726889 403.809056 
 127.183889 35.726889 408.189334 
 127.184111 35.726889 416.966928 
 127.184333 35.726889 425.677360 
 127.184444 35.726889 429.968409 
 127.184556 35.726889 434.203578 
 127.184667 35.726889 438.362040 
 127.183667 35.726889 399.446932 
 127.183778 35.726889 403.809056 
 127.183889 35.726889 408.189334 
 127.184000 35.726889 412.581939 
 127.184222 35.726889 421.337779 
 127.184444 35.726889 429.968409 
 127.184556 35.726889 434.203578 
 127.184667 35.726889 438.362040 
 127.184778 35.726889 442.436054 
 127.183667 35.727000 400.687565 
 127.183778 35.727000 405.049355 
 127.183889 35.727000 409.427151 
 127.184000 35.727000 413.815064 
 127.184222 35.727000 422.554705 
 127.184444 35.727000 431.159777 
 127.184556 35.727000 435.378573 
 127.184667 35.727000 439.518259 
 127.184778 35.727000 443.571053 
 127.183667 35.727111 401.908528 
 127.183778 35.727111 406.269344 
 127.183889 35.727111 410.644011 
 127.184000 35.727111 415.026581 
 127.184222 35.727111 423.748717 
 127.184444 35.727111 432.326935 
 127.184556 35.727111 436.528721 
 127.184667 35.727111 440.649004 
 127.184778 35.727111 444.679962 
 127.183778 35.727111 406.269344 
 127.183889 35.727111 410.644011 
 127.184000 35.727111 415.026581 
 127.184111 35.727111 419.397028 
 127.184333 35.727111 428.064452 
 127.184556 35.727111 436.528721 
 127.184667 35.727111 440.649004 
 127.184778 35.727111 444.679962 
 127.184889 35.727111 448.601016 
 127.183778 35.727222 407.464595 
 127.183889 35.727222 411.835506 
 127.184000 35.727222 416.212110 
 127.184111 35.727222 420.574343 
 127.184333 35.727222 429.218410 
 127.184556 35.727222 437.649918 
 127.184667 35.727222 441.750253 
 127.184778 35.727222 445.758853 
 127.184889 35.727222 449.655174 
 127.183778 35.727333 408.639005 
 127.183889 35.727333 413.005528 
 127.184000 35.727333 417.375532 
 127.184111 35.727333 421.728918 
 127.184333 35.727333 430.348372 
 127.184556 35.727333 438.745893 
 127.184667 35.727333 442.825686 
 127.184778 35.727333 446.811347 
 127.184889 35.727333 450.682373 
 127.183889 35.727333 413.005528 
 127.184000 35.727333 417.375532 
 127.184111 35.727333 421.728918 
 127.184222 35.727333 426.058949 
 127.184444 35.727333 434.579864 
 127.184667 35.727333 442.825686 
 127.184778 35.727333 446.811347 
 127.184889 35.727333 450.682373 
 127.185000 35.727333 454.430644 
 127.183889 35.727445 414.151816 
 127.184000 35.727445 418.514606 
 127.184111 35.727445 422.858539 
 127.184222 35.727445 427.176824 
 127.184444 35.727445 435.667300 
 127.184667 35.727445 443.873293 
 127.184778 35.727445 447.835492 
 127.184889 35.727445 451.680722 
 127.185000 35.727445 455.400837 
 127.183889 35.727556 415.272288 
 127.184000 35.727556 419.627277 
 127.184111 35.727556 423.961179 
 127.184222 35.727556 428.267155 
 127.184444 35.727556 436.726114 
 127.184667 35.727556 444.891281 
 127.184778 35.727556 448.829556 
 127.184889 35.727556 452.648557 
 127.185000 35.727556 456.340113 
 127.183889 35.727667 416.370651 
 127.184000 35.727667 420.717235 
 127.184111 35.727667 425.040507 
 127.184222 35.727667 429.333582 
 127.184444 35.727667 437.759868 
 127.184667 35.727667 445.883109 
 127.184778 35.727667 449.796938 
 127.184889 35.727667 453.589209 
 127.185000 35.727667 457.251728 
 127.184000 35.727667 420.717235 
 127.184111 35.727667 425.040507 
 127.184222 35.727667 429.333582 
 127.184333 35.727667 433.579149 
 127.184556 35.727667 441.868088 
 127.184778 35.727667 449.796938 
 127.184889 35.727667 453.589209 
 127.185000 35.727667 457.251728 
 127.185111 35.727667 460.764786 
 127.184000 35.727778 421.780613 
 127.184111 35.727778 426.092708 
 127.184222 35.727778 430.372348 
 127.184333 35.727778 434.602209 
 127.184556 35.727778 442.852888 
 127.184778 35.727778 450.734315 
 127.184889 35.727778 454.499469 
 127.185000 35.727778 458.132596 
 127.185111 35.727778 461.614061 
 127.184000 35.727889 422.820969 
 127.184111 35.727889 427.121314 
 127.184222 35.727889 431.386956 
 127.184333 35.727889 435.600560 
 127.184556 35.727889 443.811920 
 127.184778 35.727889 451.644939 
 127.184889 35.727889 455.382519 
 127.185000 35.727889 458.985823 
 127.185111 35.727889 462.435293 
 127.184111 35.727889 427.121314 
 127.184222 35.727889 431.386956 
 127.184333 35.727889 435.600560 
 127.184444 35.727889 439.744788 
 127.184667 35.727889 447.781320 
 127.184889 35.727889 455.382519 
 127.185000 35.727889 458.985823 
 127.185111 35.727889 462.435293 
 127.185222 35.727889 465.722648 
 127.184111 35.728000 428.122726 
 127.184222 35.728000 432.373871 
 127.184333 35.728000 436.570739 
 127.184444 35.728000 440.695997 
 127.184667 35.728000 448.687829 
 127.184889 35.728000 456.235397 
 127.185000 35.728000 459.808574 
 127.185111 35.728000 463.225782 
 127.185222 35.728000 466.478730 
 127.184111 35.728111 429.100345 
 127.184222 35.728111 433.336460 
 127.184333 35.728111 437.516073 
 127.184444 35.728111 441.621860 
 127.184667 35.728111 449.568049 
 127.184889 35.728111 457.061137 
 127.185000 35.728111 460.603804 
 127.185111 35.728111 463.988400 
 127.185222 35.728111 467.206622 
 127.184222 35.728111 433.336460 
 127.184333 35.728111 437.516073 
 127.184444 35.728111 441.621860 
 127.184556 35.728111 445.646038 
 127.184778 35.728111 453.379795 
 127.185000 35.728111 460.603804 
 127.185111 35.728111 463.988400 
 127.185222 35.728111 467.206622 
 127.185333 35.728111 470.240133 
 127.184222 35.728222 434.272994 
 127.184333 35.728222 438.434882 
 127.184444 35.728222 442.520748 
 127.184556 35.728222 446.522783 
 127.184778 35.728222 454.205690 
 127.185000 35.728222 461.370222 
 127.185111 35.728222 464.721935 
 127.185222 35.728222 467.905200 
 127.185333 35.728222 470.901784 
 127.184222 35.728333 435.181946 
 127.184333 35.728333 439.325687 
 127.184444 35.728333 443.391240 
 127.184556 35.728333 447.370766 
 127.184778 35.728333 455.002191 
 127.185000 35.728333 462.106756 
 127.185111 35.728333 465.425403 
 127.185222 35.728333 468.573568 
 127.185333 35.728333 471.533128 
 127.184222 35.728445 436.066478 
 127.184333 35.728445 440.191610 
 127.184444 35.728445 444.236407 
 127.184556 35.728445 448.193004 
 127.184778 35.728445 455.772185 
 127.185000 35.728445 462.816141 
 127.185111 35.728445 466.101450 
 127.185222 35.728445 469.214283 
 127.185333 35.728445 472.136622 
 127.184333 35.728445 440.191610 
 127.184444 35.728445 444.236407 
 127.184556 35.728445 448.193004 
 127.184667 35.728445 452.040983 
 127.184889 35.728445 459.366675 
 127.185111 35.728445 466.101450 
 127.185222 35.728445 469.214283 
 127.185333 35.728445 472.136622 
 127.185444 35.728445 474.860282 
 127.184333 35.728556 441.029752 
 127.184444 35.728556 445.053443 
 127.184556 35.728556 448.986793 
 127.184667 35.728556 452.809436 
 127.184889 35.728556 460.078212 
 127.185111 35.728556 466.748006 
 127.185222 35.728556 469.825421 
 127.185333 35.728556 472.710503 
 127.185444 35.728556 475.395069 
 127.184333 35.728667 441.843097 
 127.184444 35.728667 445.845282 
 127.184556 35.728667 449.755009 
 127.184667 35.728667 453.551967 
 127.184889 35.728667 460.763224 
 127.185111 35.728667 467.367571 
 127.185222 35.728667 470.409393 
 127.185333 35.728667 473.257082 
 127.185444 35.728667 475.902462 
 127.184444 35.728667 445.845282 
 127.184556 35.728667 449.755009 
 127.184667 35.728667 453.551967 
 127.184778 35.728667 457.227968 
 127.185000 35.728667 464.149406 
 127.185222 35.728667 470.409393 
 127.185333 35.728667 473.257082 
 127.185444 35.728667 475.902462 
 127.185556 35.728667 478.329200 
 127.184444 35.728778 446.609345 
 127.184556 35.728778 450.495178 
 127.184667 35.728778 454.266217 
 127.184778 35.728778 457.914261 
 127.185000 35.728778 464.773902 
 127.185222 35.728778 470.964522 
 127.185333 35.728778 473.774844 
 127.185444 35.728778 476.381111 
 127.185556 35.728778 478.767125 
 127.184444 35.728889 447.348428 
 127.184556 35.728889 451.210037 
 127.184667 35.728889 454.954860 
 127.184778 35.728889 458.574680 
 127.185000 35.728889 465.372095 
 127.185222 35.728889 471.493077 
 127.185333 35.728889 474.265957 
 127.185444 35.728889 476.833083 
 127.185556 35.728889 479.178390 
 127.184556 35.728889 451.210037 
 127.184667 35.728889 454.954860 
 127.184778 35.728889 458.574680 
 127.184889 35.728889 462.049872 
 127.185111 35.728889 468.522604 
 127.185333 35.728889 474.265957 
 127.185444 35.728889 476.833083 
 127.185556 35.728889 479.178390 
 127.185667 35.728889 481.294012 
 127.184556 35.729000 451.897343 
 127.184667 35.729000 455.615764 
 127.184778 35.729000 459.207218 
 127.184889 35.729000 462.652161 
 127.185111 35.729000 469.058842 
 127.185333 35.729000 474.729145 
 127.185444 35.729000 477.257268 
 127.185556 35.729000 479.562058 
 127.185667 35.729000 481.635666 
 127.184556 35.729111 452.559695 
 127.184667 35.729111 456.251467 
 127.184778 35.729111 459.814341 
 127.184889 35.729111 463.228857 
 127.185111 35.729111 469.569253 
 127.185333 35.729111 475.166441 
 127.185444 35.729111 477.655596 
 127.185556 35.729111 479.919954 
 127.185667 35.729111 481.951679 
 127.184667 35.729111 456.251467 
 127.184778 35.729111 459.814341 
 127.184889 35.729111 463.228857 
 127.185000 35.729111 466.486675 
 127.185222 35.729111 472.468280 
 127.185444 35.729111 477.655596 
 127.185556 35.729111 479.919954 
 127.185667 35.729111 481.951679 
 127.185778 35.729111 483.736785 
 127.184667 35.729222 456.861092 
 127.184778 35.729222 460.395248 
 127.184889 35.729222 463.779241 
 127.185000 35.729222 467.004734 
 127.185222 35.729222 472.916604 
 127.185444 35.729222 478.027810 
 127.185556 35.729222 480.251921 
 127.185667 35.729222 482.242005 
 127.185778 35.729222 483.984224 
 127.184667 35.729333 457.443962 
 127.184778 35.729333 460.949340 
 127.184889 35.729333 464.302796 
 127.185000 35.729333 467.495995 
 127.185222 35.729333 473.338340 
 127.185444 35.729333 478.373854 
 127.185556 35.729333 480.558008 
 127.185667 35.729333 482.506794 
 127.185778 35.729333 484.206528 
 127.184667 35.729444 458.002413 
 127.184778 35.729444 461.478882 
 127.184889 35.729444 464.801709 
 127.185000 35.729444 467.962564 
 127.185222 35.729444 473.735419 
 127.185444 35.729444 478.695462 
 127.185556 35.729444 480.839844 
 127.185667 35.729444 482.747569 
 127.185778 35.729444 484.405104 
 127.184778 35.729444 461.478882 
 127.184889 35.729444 464.801709 
 127.185000 35.729444 467.962564 
 127.185111 35.729444 470.943227 
 127.185333 35.729444 476.322195 
 127.185556 35.729444 480.839844 
 127.185667 35.729444 482.747569 
 127.185778 35.729444 484.405104 
 127.185889 35.729444 485.805124 
 127.184778 35.729555 461.982430 
 127.184889 35.729555 465.274672 
 127.185000 35.729555 468.403274 
 127.185111 35.729555 471.350131 
 127.185333 35.729555 476.656986 
 127.185556 35.729555 481.097057 
 127.185667 35.729555 482.964133 
 127.185778 35.729555 484.579939 
 127.185889 35.729555 485.937175 
 127.184778 35.729667 462.462118 
 127.184889 35.729667 465.723741 
 127.185000 35.729667 468.820103 
 127.185111 35.729667 471.733209 
 127.185333 35.729667 476.968206 
 127.185556 35.729667 481.331156 
 127.185667 35.729667 483.157888 
 127.185778 35.729667 484.732323 
 127.185889 35.729667 486.047190 
 127.184889 35.729667 465.723741 
 127.185000 35.729667 468.820103 
 127.185111 35.729667 471.733209 
 127.185222 35.729667 474.454806 
 127.185444 35.729667 479.265354 
 127.185667 35.729667 483.157888 
 127.185778 35.729667 484.732323 
 127.185889 35.729667 486.047190 
 127.186000 35.729667 487.091373 
 127.184889 35.729778 466.147824 
 127.185000 35.729778 469.212097 
 127.185111 35.729778 472.091656 
 127.185222 35.729778 474.778265 
 127.185444 35.729778 479.514918 
 127.185667 35.729778 483.328846 
 127.185778 35.729778 484.862445 
 127.185889 35.729778 486.135535 
 127.186000 35.729778 487.137164 
 127.184889 35.729889 466.548853 
 127.185000 35.729889 469.581109 
 127.185111 35.729889 472.427241 
 127.185222 35.729889 475.079029 
 127.185444 35.729889 479.742276 
 127.185667 35.729889 483.478294 
 127.185778 35.729889 484.971487 
 127.185889 35.729889 486.203286 
 127.186000 35.729889 487.162898 
 127.185000 35.729889 469.581109 
 127.185111 35.729889 472.427241 
 127.185222 35.729889 475.079029 
 127.185333 35.729889 477.520044 
 127.185556 35.729889 481.730916 
 127.185778 35.729889 484.971487 
 127.185889 35.729889 486.203286 
 127.186000 35.729889 487.162898 
 127.186111 35.729889 487.843684 
 127.185000 35.730000 469.926969 
 127.185111 35.730000 472.739881 
 127.185222 35.730000 475.357110 
 127.185333 35.730000 477.762354 
 127.185556 35.730000 481.898274 
 127.185778 35.730000 485.059962 
 127.185889 35.730000 486.251060 
 127.186000 35.730000 487.169305 
 127.186111 35.730000 487.808089 
 127.185000 35.730111 470.249684 
 127.185111 35.730111 473.029675 
 127.185222 35.730111 475.612695 
 127.185333 35.730111 477.982576 
 127.185556 35.730111 482.044526 
 127.185778 35.730111 485.128546 
 127.185889 35.730111 486.279638 
 127.186000 35.730111 487.157266 
 127.186111 35.730111 487.754858 
 127.185111 35.730111 473.029675 
 127.185222 35.730111 475.612695 
 127.185333 35.730111 477.982576 
 127.185444 35.730111 480.131361 
 127.185667 35.730111 483.714460 
 127.185889 35.730111 486.279638 
 127.186000 35.730111 487.157266 
 127.186111 35.730111 487.754858 
 127.186222 35.730111 488.064299 
 127.185111 35.730222 473.298214 
 127.185222 35.730222 475.847291 
 127.185333 35.730222 478.182127 
 127.185444 35.730222 480.294792 
 127.185667 35.730222 483.802884 
 127.185889 35.730222 486.289946 
 127.186000 35.730222 487.127604 
 127.186111 35.730222 487.684706 
 127.186222 35.730222 487.953302 
 127.185111 35.730333 473.545191 
 127.185222 35.730333 476.060740 
 127.185333 35.730333 478.361001 
 127.185444 35.730333 480.438072 
 127.185667 35.730333 483.872388 
 127.185889 35.730333 486.282793 
 127.186000 35.730333 487.081298 
 127.186111 35.730333 487.598788 
 127.186222 35.730333 487.827470 
 127.185111 35.730444 473.772089 
 127.185222 35.730444 476.254442 
 127.185333 35.730444 478.520511 
 127.185444 35.730444 480.562428 
 127.185667 35.730444 483.924008 
 127.185889 35.730444 486.259022 
 127.186000 35.730444 487.019090 
 127.186111 35.730444 487.497739 
 127.186222 35.730444 487.687336 
 127.185222 35.730444 476.254442 
 127.185333 35.730444 478.520511 
 127.185444 35.730444 480.562428 
 127.185556 35.730444 482.366098 
 127.185778 35.730444 485.223995 
 127.186000 35.730444 487.019090 
 127.186111 35.730444 487.497739 
 127.186222 35.730444 487.687336 
 127.186333 35.730444 487.582090 
 127.185222 35.730555 476.428413 
 127.185333 35.730555 478.660825 
 127.185444 35.730555 480.668179 
 127.185556 35.730555 482.436523 
 127.185778 35.730555 485.221737 
 127.186000 35.730555 486.942107 
 127.186111 35.730555 487.382853 
 127.186222 35.730555 487.534361 
 127.186333 35.730555 487.390875 
 127.185222 35.730667 476.583954 
 127.185333 35.730667 478.783159 
 127.185444 35.730667 480.756456 
 127.185556 35.730667 482.490035 
 127.185778 35.730667 485.203855 
 127.186000 35.730667 486.851013 
 127.186111 35.730667 487.254700 
 127.186222 35.730667 487.369014 
 127.186333 35.730667 487.188240 
 127.185333 35.730667 478.783159 
 127.185444 35.730667 480.756456 
 127.185556 35.730667 482.490035 
 127.185667 35.730667 483.976456 
 127.185889 35.730667 486.165270 
 127.186111 35.730667 487.254700 
 127.186222 35.730667 487.369014 
 127.186333 35.730667 487.188240 
 127.186444 35.730667 486.707599 
 127.185333 35.730778 478.888008 
 127.185444 35.730778 480.827846 
 127.185556 35.730778 482.527313 
 127.185667 35.730778 483.979010 
 127.185889 35.730778 486.097021 
 127.186111 35.730778 487.114444 
 127.186222 35.730778 487.192559 
 127.186333 35.730778 486.975549 
 127.186444 35.730778 486.458784 
 127.185333 35.730889 478.976002 
 127.185444 35.730889 480.883065 
 127.185556 35.730889 482.549165 
 127.185667 35.730889 483.966940 
 127.185889 35.730889 486.015926 
 127.186111 35.730889 486.963347 
 127.186222 35.730889 487.006350 
 127.186333 35.730889 486.754244 
 127.186444 35.730889 486.202550 
 127.185444 35.730889 480.883065 
 127.185556 35.730889 482.549165 
 127.185667 35.730889 483.966940 
 127.185778 35.730889 485.124821 
 127.186000 35.730889 486.630868 
 127.186222 35.730889 487.006350 
 127.186333 35.730889 486.754244 
 127.186444 35.730889 486.202550 
 127.186556 35.730889 485.346372 
 127.185444 35.731000 480.923119 
 127.185556 35.731000 482.556512 
 127.185667 35.731000 483.941082 
 127.185778 35.731000 485.065406 
 127.186000 35.731000 486.503561 
 127.186222 35.731000 486.810781 
 127.186333 35.731000 486.524629 
 127.186444 35.731000 485.939109 
 127.186556 35.731000 485.049363 
 127.185444 35.731111 480.948695 
 127.185556 35.731111 482.550184 
 127.185667 35.731111 483.902413 
 127.185778 35.731111 484.994101 
 127.186000 35.731111 486.366375 
 127.186222 35.731111 486.607567 
 127.186333 35.731111 486.288568 
 127.186444 35.731111 485.670471 
 127.186556 35.731111 484.748456 
 127.185556 35.731111 482.550184 
 127.185667 35.731111 483.902413 
 127.185778 35.731111 484.994101 
 127.185889 35.731111 485.818453 
 127.186111 35.731111 486.631652 
 127.186333 35.731111 486.288568 
 127.186444 35.731111 485.670471 
 127.186556 35.731111 484.748456 
 127.186667 35.731111 483.520989 
 127.185556 35.731222 482.531033 
 127.185667 35.731222 483.851703 
 127.185778 35.731222 484.911594 
 127.185889 35.731222 485.703953 
 127.186111 35.731222 486.453061 
 127.186333 35.731222 486.046333 
 127.186444 35.731222 485.396823 
 127.186556 35.731222 484.443758 
 127.186667 35.731222 483.185736 
 127.185556 35.731333 482.500006 
 127.185667 35.731333 483.790039 
 127.185778 35.731333 484.819110 
 127.185889 35.731333 485.580513 
 127.186111 35.731333 486.267767 
 127.186333 35.731333 485.799846 
 127.186444 35.731333 485.120226 
 127.186556 35.731333 484.137461 
 127.186667 35.731333 482.850281 
 127.185667 35.731333 483.790039 
 127.185778 35.731333 484.819110 
 127.185889 35.731333 485.580513 
 127.186000 35.731333 486.065441 
 127.186222 35.731333 486.181057 
 127.186444 35.731333 485.120226 
 127.186556 35.731333 484.137461 
 127.186667 35.731333 482.850281 
 127.186778 35.731333 481.254729 
 127.185667 35.731444 483.718133 
 127.185778 35.731444 484.717288 
 127.185889 35.731444 485.448694 
 127.186000 35.731444 485.903684 
 127.186222 35.731444 485.959875 
 127.186444 35.731444 484.840855 
 127.186556 35.731444 483.829666 
 127.186667 35.731444 482.514651 
 127.186778 35.731444 480.891890 
 127.185667 35.731555 483.637167 
 127.185778 35.731555 484.607439 
 127.185889 35.731555 485.309939 
 127.186000 35.731555 485.736136 
 127.186222 35.731555 485.735355 
 127.186444 35.731555 484.560800 
 127.186556 35.731555 483.522587 
 127.186667 35.731555 482.181181 
 127.186778 35.731555 480.532697 
 127.185667 35.731667 483.547804 
 127.185778 35.731667 484.490157 
 127.185889 35.731667 485.164772 
 127.186000 35.731667 485.563251 
 127.186222 35.731667 485.507808 
 127.186444 35.731667 484.280234 
 127.186556 35.731667 483.216328 
 127.186667 35.731667 481.849907 
 127.186778 35.731667 480.177125 
 127.185778 35.731667 484.490157 
 127.185889 35.731667 485.164772 
 127.186000 35.731667 485.563251 
 127.186111 35.731667 485.679606 
 127.186333 35.731667 485.042523 
 127.186556 35.731667 483.216328 
 127.186667 35.731667 481.849907 
 127.186778 35.731667 480.177125 
 127.186889 35.731667 478.199774 
 127.185778 35.731778 484.366607 
 127.185889 35.731778 485.014435 
 127.186000 35.731778 485.386348 
 127.186111 35.731778 485.476406 
 127.186333 35.731778 484.787962 
 127.186556 35.731778 482.912585 
 127.186667 35.731778 481.522597 
 127.186778 35.731778 479.827006 
 127.186889 35.731778 477.827711 
 127.185778 35.731889 484.238000 
 127.185889 35.731889 484.860210 
 127.186000 35.731889 485.206780 
 127.186111 35.731889 485.271815 
 127.186333 35.731889 484.534711 
 127.186556 35.731889 482.613034 
 127.186667 35.731889 481.200986 
 127.186778 35.731889 479.484135 
 127.186889 35.731889 477.464480 
 127.185889 35.731889 484.860210 
 127.186000 35.731889 485.206780 
 127.186111 35.731889 485.271815 
 127.186222 35.731889 485.049540 
 127.186444 35.731889 483.724052 
 127.186667 35.731889 481.200986 
 127.186778 35.731889 479.484135 
 127.186889 35.731889 477.464480 
 127.187000 35.731889 475.139037 
 127.185889 35.732000 484.702586 
 127.186000 35.732000 485.024973 
 127.186111 35.732000 485.066200 
 127.186222 35.732000 484.820613 
 127.186444 35.732000 483.450243 
 127.186667 35.732000 480.885155 
 127.186778 35.732000 479.148538 
 127.186889 35.732000 477.110058 
 127.187000 35.732000 474.766759 
 127.185889 35.732111 484.543122 
 127.186000 35.732111 484.842595 
 127.186111 35.732111 484.861335 
 127.186222 35.732111 484.593804 
 127.186444 35.732111 483.181430 
 127.186667 35.732111 480.577369 
 127.186778 35.732111 478.822570 
 127.186889 35.732111 476.766881 
 127.187000 35.732111 474.407378 
 127.186000 35.732111 484.842595 
 127.186111 35.732111 484.861335 
 127.186222 35.732111 484.593804 
 127.186333 35.732111 484.034852 
 127.186556 35.732111 482.029089 
 127.186778 35.732111 478.822570 
 127.186889 35.732111 476.766881 
 127.187000 35.732111 474.407378 
 127.187111 35.732111 471.748927 
 127.186000 35.732222 484.660067 
 127.186111 35.732222 484.657586 
 127.186222 35.732222 484.369429 
 127.186333 35.732222 483.790490 
 127.186556 35.732222 481.747035 
 127.186778 35.732222 478.506308 
 127.186889 35.732222 476.434986 
 127.187000 35.732222 474.060891 
 127.187111 35.732222 471.388961 
 127.186000 35.732333 484.479061 
 127.186111 35.732333 484.456724 
 127.186222 35.732333 484.149350 
 127.186333 35.732333 483.551881 
 127.186556 35.732333 481.473772 
 127.186778 35.732333 478.202029 
 127.186889 35.732333 476.116720 
 127.187000 35.732333 473.729711 
 127.187111 35.732333 471.046007 
 127.186111 35.732333 484.456724 
 127.186222 35.732333 484.149350 
 127.186333 35.732333 483.551881 
 127.186444 35.732333 482.661475 
 127.186667 35.732333 479.988498 
 127.186889 35.732333 476.116720 
 127.187000 35.732333 473.729711 
 127.187111 35.732333 471.046007 
 127.187222 35.732333 468.063520 
 127.186111 35.732444 484.259127 
 127.186222 35.732444 483.933901 
 127.186333 35.732444 483.319313 
 127.186444 35.732444 482.412623 
 127.186667 35.732444 479.709788 
 127.186889 35.732444 475.812190 
 127.187000 35.732444 473.413914 
 127.187111 35.732444 470.720112 
 127.187222 35.732444 467.728721 
 127.186111 35.732556 484.066211 
 127.186222 35.732556 483.724553 
 127.186333 35.732556 483.094314 
 127.186444 35.732556 482.172846 
 127.186667 35.732556 479.443289 
 127.186889 35.732556 475.523148 
 127.187000 35.732556 473.115291 
 127.187111 35.732556 470.413103 
 127.187222 35.732556 467.414543 
 127.186222 35.732556 483.724553 
 127.186333 35.732556 483.094314 
 127.186444 35.732556 482.172846 
 127.186556 35.732556 480.955872 
 127.186778 35.732556 477.631547 
 127.187000 35.732556 473.115291 
 127.187111 35.732556 470.413103 
 127.187222 35.732556 467.414543 
 127.187333 35.732556 464.127345 
 127.186222 35.732667 483.522732 
 127.186333 35.732667 482.878350 
 127.186444 35.732667 481.943652 
 127.186556 35.732667 480.714403 
 127.186778 35.732667 477.368665 
 127.187000 35.732667 472.835503 
 127.187111 35.732667 470.126661 
 127.187222 35.732667 467.122687 
 127.187333 35.732667 463.831350 
 127.186222 35.732778 483.328822 
 127.186333 35.732778 482.671773 
 127.186444 35.732778 481.725363 
 127.186556 35.732778 480.485399 
 127.186778 35.732778 477.121478 
 127.187000 35.732778 472.574767 
 127.187111 35.732778 469.860991 
 127.187222 35.732778 466.853347 
 127.187333 35.732778 463.559635 
 127.186333 35.732889 482.476377 
 127.186444 35.732889 481.519830 
 127.186556 35.732889 480.270762 
 127.186667 35.732889 478.729292 
 127.186889 35.732889 474.761497 
 127.187111 35.732889 469.618180 
 127.187222 35.732889 466.608632 
 127.187333 35.732889 463.314323 
 127.187444 35.732889 459.734011 
 127.186333 35.733000 482.292569 
 127.186444 35.733000 481.327438 
 127.186556 35.733000 480.070861 
 127.186667 35.733000 478.523017 
 127.186889 35.733000 474.546042 
 127.187111 35.733000 469.398551 
 127.187222 35.733000 466.388863 
 127.187333 35.733000 463.095740 
 127.187444 35.733000 459.517951 
 127.186333 35.733111 482.122045 
 127.186444 35.733111 481.149929 
 127.186556 35.733111 479.887474 
 127.186667 35.733111 478.334919 
 127.186889 35.733111 474.352169 
 127.187111 35.733111 469.203996 
 127.187222 35.733111 466.195941 
 127.187333 35.733111 462.905785 
 127.187444 35.733111 459.332313 
 127.186444 35.733111 481.149929 
 127.186556 35.733111 479.887474 
 127.186667 35.733111 478.334919 
 127.186778 35.733111 476.488893 
 127.187000 35.733111 471.922095 
 127.187222 35.733111 466.195941 
 127.187333 35.733111 462.905785 
 127.187444 35.733111 459.332313 
 127.187556 35.733111 455.485853 
 127.186444 35.733222 480.987759 
 127.186556 35.733222 479.721052 
 127.186667 35.733222 478.165441 
 127.186778 35.733222 476.317593 
 127.187000 35.733222 471.750995 
 127.187222 35.733222 466.030327 
 127.187333 35.733222 462.744934 
 127.187444 35.733222 459.177587 
 127.187556 35.733222 455.338605 
 127.186444 35.733333 480.842305 
 127.186556 35.733333 479.572990 
 127.186667 35.733333 478.015999 
 127.186778 35.733333 476.168034 
 127.187000 35.733333 471.605114 
 127.187222 35.733333 465.893483 
 127.187333 35.733333 462.614648 
 127.187444 35.733333 459.055230 
 127.187556 35.733333 455.225532 
 127.186556 35.733333 479.572990 
 127.186667 35.733333 478.015999 
 127.186778 35.733333 476.168034 
 127.186889 35.733333 474.031938 
 127.187111 35.733333 468.892925 
 127.187333 35.733333 462.614648 
 127.187444 35.733333 459.055230 
 127.187556 35.733333 455.225532 
 127.187667 35.733333 451.125037 
 127.186556 35.733444 479.444544 
 127.186667 35.733444 477.887855 
 127.186778 35.733444 476.041480 
 127.186889 35.733444 473.908288 
 127.187111 35.733444 468.779120 
 127.187333 35.733444 462.516152 
 127.187444 35.733444 458.966449 
 127.187556 35.733444 455.147820 
 127.187667 35.733444 451.059754 
 127.186556 35.733556 479.336306 
 127.186667 35.733556 477.781608 
 127.186778 35.733556 475.938541 
 127.186889 35.733556 473.809995 
 127.187111 35.733556 468.694219 
 127.187333 35.733556 462.450164 
 127.187444 35.733556 458.911993 
 127.187556 35.733556 455.106255 
 127.187667 35.733556 451.032441 
 127.186667 35.733556 477.781608 
 127.186778 35.733556 475.938541 
 127.186889 35.733556 473.809995 
 127.187000 35.733556 471.393428 
 127.187222 35.733556 465.710516 
 127.187444 35.733556 458.911993 
 127.187556 35.733556 455.106255 
 127.187667 35.733556 451.032441 
 127.187778 35.733556 446.703122 
 127.186667 35.733667 477.698641 
 127.186778 35.733667 475.860594 
 127.186889 35.733667 473.738423 
 127.187000 35.733667 471.329614 
 127.187222 35.733667 465.666375 
 127.187444 35.733667 458.893076 
 127.187556 35.733667 455.102002 
 127.187667 35.733667 451.044209 
 127.187778 35.733667 446.732218 
 127.186667 35.733778 477.639667 
 127.186778 35.733778 475.808374 
 127.186889 35.733778 473.694333 
 127.187000 35.733778 471.295054 
 127.187222 35.733778 465.655080 
 127.187444 35.733778 458.910632 
 127.187556 35.733778 455.136039 
 127.187667 35.733778 451.096086 
 127.187778 35.733778 446.803235 
 127.186778 35.733778 475.808374 
 127.186889 35.733778 473.694333 
 127.187000 35.733778 471.295054 
 127.187111 35.733778 468.615908 
 127.187333 35.733778 462.420371 
 127.187556 35.733778 455.136039 
 127.187667 35.733778 451.096086 
 127.187778 35.733778 446.803235 
 127.187889 35.733778 442.257586 
 127.186778 35.733889 475.783039 
 127.186889 35.733889 473.678854 
 127.187000 35.733889 471.290848 
 127.187111 35.733889 468.624377 
 127.187333 35.733889 462.458422 
 127.187556 35.733889 455.209212 
 127.187667 35.733889 451.188848 
 127.187778 35.733889 446.916874 
 127.187889 35.733889 442.393384 
 127.186778 35.734000 475.785458 
 127.186889 35.734000 473.692890 
 127.187000 35.734000 471.317937 
 127.187111 35.734000 468.665932 
 127.187333 35.734000 462.533170 
 127.187556 35.734000 455.322703 
 127.187667 35.734000 451.323736 
 127.187778 35.734000 447.074439 
 127.187889 35.734000 442.574898 
 127.186889 35.734000 473.692890 
 127.187000 35.734000 471.317937 
 127.187111 35.734000 468.665932 
 127.187222 35.734000 465.735099 
 127.187444 35.734000 459.059013 
 127.187667 35.734000 451.323736 
 127.187778 35.734000 447.074439 
 127.187889 35.734000 442.574898 
 127.188000 35.734000 437.839578 
 127.186889 35.734111 473.737322 
 127.187000 35.734111 471.377152 
 127.187111 35.734111 468.741353 
 127.187222 35.734111 465.828161 
 127.187444 35.734111 459.191549 
 127.187667 35.734111 451.501174 
 127.187778 35.734111 447.276264 
 127.187889 35.734111 442.802368 
 127.188000 35.734111 438.093858 
 127.186889 35.734222 473.813206 
 127.187000 35.734222 471.469599 
 127.187111 35.734222 468.851793 
 127.187222 35.734222 465.958040 
 127.187444 35.734222 459.364504 
 127.187667 35.734222 451.722623 
 127.187778 35.734222 447.523883 
 127.187889 35.734222 443.077403 
 127.188000 35.734222 438.397456 
 127.187000 35.734222 471.469599 
 127.187111 35.734222 468.851793 
 127.187222 35.734222 465.958040 
 127.187333 35.734222 462.795982 
 127.187556 35.734222 455.673553 
 127.187778 35.734222 447.523883 
 127.187889 35.734222 443.077403 
 127.188000 35.734222 438.397456 
 127.188111 35.734222 433.484645 
 127.187000 35.734333 471.596075 
 127.187111 35.734333 468.998018 
 127.187222 35.734333 466.125466 
 127.187333 35.734333 462.986005 
 127.187556 35.734333 455.912905 
 127.187778 35.734333 447.817792 
 127.187889 35.734333 443.400441 
 127.188000 35.734333 438.750751 
 127.188111 35.734333 433.869306 
 127.187000 35.734444 471.757112 
 127.187111 35.734444 469.180515 
 127.187222 35.734444 466.330876 
 127.187333 35.734444 463.215719 
 127.187556 35.734444 456.195343 
 127.187778 35.734444 448.158130 
 127.187889 35.734444 443.771552 
 127.188000 35.734444 439.153737 
 127.188111 35.734444 434.305253 
 127.187000 35.734556 471.954072 
 127.187111 35.734556 469.400712 
 127.187222 35.734556 466.575768 
 127.187333 35.734556 463.486696 
 127.187556 35.734556 456.522594 
 127.187778 35.734556 448.546792 
 127.187889 35.734556 444.192721 
 127.188000 35.734556 439.608494 
 127.188111 35.734556 434.794661 
 127.187111 35.734556 469.400712 
 127.187222 35.734556 466.575768 
 127.187333 35.734556 463.486696 
 127.187444 35.734556 460.132402 
 127.187667 35.734556 452.656764 
 127.187889 35.734556 444.192721 
 127.188000 35.734556 439.608494 
 127.188111 35.734556 434.794661 
 127.188222 35.734556 429.767090 
 127.187111 35.734667 469.658616 
 127.187222 35.734667 466.860053 
 127.187333 35.734667 463.798746 
 127.187444 35.734667 460.473604 
 127.187667 35.734667 453.060164 
 127.187889 35.734667 444.663165 
 127.188000 35.734667 440.114104 
 127.188111 35.734667 435.336473 
 127.188222 35.734667 430.346007 
 127.187111 35.734778 469.955847 
 127.187222 35.734778 467.185429 
 127.187333 35.734778 464.153649 
 127.187444 35.734778 460.859418 
 127.187667 35.734778 453.511659 
 127.187889 35.734778 445.185129 
 127.188000 35.734778 440.672913 
 127.188111 35.734778 435.933140 
 127.188222 35.734778 430.981404 
 127.187222 35.734778 467.185429 
 127.187333 35.734778 464.153649 
 127.187444 35.734778 460.859418 
 127.187556 35.734778 457.312261 
 127.187778 35.734778 449.469276 
 127.188000 35.734778 440.672913 
 127.188111 35.734778 435.933140 
 127.188222 35.734778 430.981404 
 127.188333 35.734778 425.818663 
 127.187222 35.734889 467.551460 
 127.187333 35.734889 464.550852 
 127.187444 35.734889 461.289168 
 127.187556 35.734889 457.775831 
 127.187778 35.734889 450.004170 
 127.188000 35.734889 441.283558 
 127.188111 35.734889 436.583148 
 127.188222 35.734889 431.671612 
 127.188333 35.734889 426.549884 
 127.187222 35.735000 467.960050 
 127.187333 35.735000 464.992352 
 127.187444 35.735000 461.764948 
 127.187556 35.735000 458.287150 
 127.187778 35.735000 450.590208 
 127.188000 35.735000 441.948659 
 127.188111 35.735000 437.289227 
 127.188222 35.735000 432.419477 
 127.188333 35.735000 427.340316 
 127.187333 35.735000 464.992352 
 127.187444 35.735000 461.764948 
 127.187556 35.735000 458.287150 
 127.187667 35.735000 454.558430 
 127.187889 35.735000 446.382477 
 127.188111 35.735000 437.289227 
 127.188222 35.735000 432.419477 
 127.188333 35.735000 427.340316 
 127.188444 35.735000 422.068759 
 127.187333 35.735111 465.478094 
 127.187444 35.735111 462.286629 
 127.187556 35.735111 458.846014 
 127.187667 35.735111 455.155717 
 127.187889 35.735111 447.059920 
 127.188111 35.735111 438.050752 
 127.188222 35.735111 433.224281 
 127.188333 35.735111 428.189145 
 127.188444 35.735111 422.962193 
 127.187333 35.735222 466.007678 
 127.187444 35.735222 462.853727 
 127.187556 35.735222 459.451852 
 127.187667 35.735222 455.801514 
 127.187889 35.735222 447.788873 
 127.188111 35.735222 438.866670 
 127.188222 35.735222 434.084867 
 127.188333 35.735222 429.095109 
 127.188444 35.735222 423.914074 
 127.187444 35.735222 462.853727 
 127.187556 35.735222 459.451852 
 127.187667 35.735222 455.801514 
 127.187778 35.735222 451.913866 
 127.188000 35.735222 443.439664 
 127.188222 35.735222 434.084867 
 127.188333 35.735222 429.095109 
 127.188444 35.735222 423.914074 
 127.188556 35.735222 418.542984 
 127.187444 35.735333 463.468684 
 127.187556 35.735333 460.107218 
 127.187667 35.735333 456.498492 
 127.187778 35.735333 452.653518 
 127.188000 35.735333 444.267650 
 127.188222 35.735333 435.004522 
 127.188333 35.735333 430.061626 
 127.188444 35.735333 424.927951 
 127.188556 35.735333 419.604687 
 127.187444 35.735444 464.129831 
 127.187556 35.735444 460.810283 
 127.187667 35.735444 457.244656 
 127.187778 35.735444 453.443817 
 127.188000 35.735444 445.149118 
 127.188222 35.735444 435.980360 
 127.188333 35.735444 431.085619 
 127.188444 35.735444 426.000556 
 127.188556 35.735444 420.726329 
 127.187556 35.735444 460.810283 
 127.187667 35.735444 457.244656 
 127.187778 35.735444 453.443817 
 127.187889 35.735444 449.407700 
 127.188111 35.735444 440.668459 
 127.188333 35.735444 431.085619 
 127.188444 35.735444 426.000556 
 127.188556 35.735444 420.726329 
 127.188667 35.735444 415.280776 
 127.187556 35.735556 461.563847 
 127.187667 35.735556 458.042931 
 127.187778 35.735556 454.287814 
 127.187889 35.735556 450.298415 
 127.188111 35.735556 441.655078 
 127.188333 35.735556 432.170811 
 127.188444 35.735556 427.135751 
 127.188556 35.735556 421.911908 
 127.188667 35.735556 416.516930 
 127.187556 35.735667 462.365655 
 127.187667 35.735667 458.890883 
 127.187778 35.735667 455.182894 
 127.187889 35.735667 451.241590 
 127.188111 35.735667 442.696808 
 127.188333 35.735667 433.313617 
 127.188444 35.735667 428.329749 
 127.188556 35.735667 423.157437 
 127.188667 35.735667 417.814133 
 127.187667 35.735667 458.890883 
 127.187778 35.735667 455.182894 
 127.187889 35.735667 451.241590 
 127.188000 35.735667 447.079447 
 127.188222 35.735667 438.107951 
 127.188444 35.735667 428.329749 
 127.188556 35.735667 423.157437 
 127.188667 35.735667 417.814133 
 127.188778 35.735667 412.301225 
 127.187667 35.735778 459.791695 
 127.187778 35.735778 456.132375 
 127.187889 35.735778 452.240680 
 127.188000 35.735778 448.128912 
 127.188222 35.735778 439.260203 
 127.188444 35.735778 429.586723 
 127.188556 35.735778 424.467235 
 127.188667 35.735778 419.176850 
 127.188778 35.735778 413.716920 
 127.187667 35.735889 460.742488 
 127.187778 35.735889 457.133182 
 127.187889 35.735889 453.292413 
 127.188000 35.735889 449.232301 
 127.188222 35.735889 440.468831 
 127.188444 35.735889 430.902364 
 127.188556 35.735889 425.836778 
 127.188667 35.735889 420.600345 
 127.188778 35.735889 415.194378 
 127.187778 35.735889 457.133182 
 127.187889 35.735889 453.292413 
 127.188000 35.735889 449.232301 
 127.188111 35.735889 444.953140 
 127.188333 35.735889 435.780056 
 127.188556 35.735889 425.836778 
 127.188667 35.735889 420.600345 
 127.188778 35.735889 415.194378 
 127.188889 35.735889 409.637255 
 127.187778 35.736000 458.188903 
 127.187889 35.736000 454.400522 
 127.188000 35.736000 450.393495 
 127.188111 35.736000 446.168092 
 127.188333 35.736000 437.103925 
 127.188556 35.736000 427.270708 
 127.188667 35.736000 422.089411 
 127.188778 35.736000 416.738544 
 127.188889 35.736000 411.236274 
 127.187778 35.736111 459.297951 
 127.187889 35.736111 455.563304 
 127.188000 35.736111 451.610673 
 127.188111 35.736111 447.440304 
 127.188333 35.736111 438.487487 
 127.188556 35.736111 428.766591 
 127.188667 35.736111 423.641490 
 127.188778 35.736111 418.346736 
 127.188889 35.736111 412.900279 
 127.187778 35.736222 460.458328 
 127.187889 35.736222 456.778633 
 127.188000 35.736222 452.881582 
 127.188111 35.736222 448.767392 
 127.188333 35.736222 439.928095 
 127.188556 35.736222 430.321516 
 127.188667 35.736222 425.253538 
 127.188778 35.736222 420.015775 
 127.188889 35.736222 414.625960 
 127.187889 35.736222 456.778633 
 127.188000 35.736222 452.881582 
 127.188111 35.736222 448.767392 
 127.188222 35.736222 444.449366 
 127.188444 35.736222 435.218504 
 127.188667 35.736222 425.253538 
 127.188778 35.736222 420.015775 
 127.188889 35.736222 414.625960 
 127.189000 35.736222 409.085531 
 127.187889 35.736333 458.050657 
 127.188000 35.736333 454.210526 
 127.188111 35.736333 450.153823 
 127.188222 35.736333 445.893641 
 127.188444 35.736333 436.779229 
 127.188667 35.736333 426.930832 
 127.188778 35.736333 421.751101 
 127.188889 35.736333 416.418919 
 127.189000 35.736333 410.935681 
 127.187889 35.736444 459.374914 
 127.188000 35.736444 455.592818 
 127.188111 35.736444 451.594678 
 127.188222 35.736444 447.393374 
 127.188444 35.736444 438.397353 
 127.188667 35.736444 428.667284 
 127.188778 35.736444 423.546393 
 127.188889 35.736444 418.272599 
 127.189000 35.736444 412.847260 
 127.188000 35.736444 455.592818 
 127.188111 35.736444 451.594678 
 127.188222 35.736444 447.393374 
 127.188333 35.736444 442.989435 
 127.188556 35.736444 433.617980 
 127.188778 35.736444 423.546393 
 127.188889 35.736444 418.272599 
 127.189000 35.736444 412.847260 
 127.189111 35.736444 407.288827 
 127.188000 35.736556 457.033044 
 127.188111 35.736556 453.094710 
 127.188222 35.736556 448.953487 
 127.188333 35.736556 444.609873 
 127.188556 35.736556 435.359095 
 127.188778 35.736556 425.407414 
 127.188889 35.736556 420.192931 
 127.189000 35.736556 414.826361 
 127.189111 35.736556 409.325934 
 127.188000 35.736667 458.526032 
 127.188111 35.736667 454.648508 
 127.188222 35.736667 450.568328 
 127.188333 35.736667 446.285957 
 127.188556 35.736667 437.157561 
 127.188778 35.736667 427.327300 
 127.188889 35.736667 422.172812 
 127.189000 35.736667 416.865645 
 127.189111 35.736667 411.423804 
 127.188111 35.736667 454.648508 
 127.188222 35.736667 450.568328 
 127.188333 35.736667 446.285957 
 127.188444 35.736667 441.815442 
 127.188667 35.736667 432.327829 
 127.188889 35.736667 422.172812 
 127.189000 35.736667 416.865645 
 127.189111 35.736667 411.423804 
 127.189222 35.736667 405.848750 
 127.188111 35.736778 456.261110 
 127.188222 35.736778 452.243108 
 127.188333 35.736778 448.023077 
 127.188444 35.736778 443.614831 
 127.188667 35.736778 434.251211 
 127.188889 35.736778 424.218496 
 127.189000 35.736778 418.971535 
 127.189111 35.736778 413.589029 
 127.189222 35.736778 408.072402 
 127.188111 35.736889 457.929528 
 127.188222 35.736889 453.974701 
 127.188333 35.736889 449.817962 
 127.188444 35.736889 445.472894 
 127.188667 35.736889 436.234944 
 127.188889 35.736889 426.326014 
 127.189000 35.736889 421.139923 
 127.189111 35.736889 415.817365 
 127.189222 35.736889 410.359725 
 127.188222 35.736889 453.974701 
 127.188333 35.736889 449.817962 
 127.188444 35.736889 445.472894 
 127.188556 35.736889 440.940205 
 127.188778 35.736889 431.358088 
 127.189000 35.736889 421.139923 
 127.189111 35.736889 415.817365 
 127.189222 35.736889 410.359725 
 127.189333 35.736889 404.785559 
 127.188222 35.737000 455.759535 
 127.188333 35.737000 451.666894 
 127.188444 35.737000 447.385764 
 127.188556 35.737000 442.916818 
 127.188778 35.737000 433.460853 
 127.189000 35.737000 423.366218 
 127.189111 35.737000 418.104080 
 127.189222 35.737000 412.705849 
 127.189333 35.737000 407.189860 
 127.188222 35.737111 457.603252 
 127.188333 35.737111 453.575698 
 127.188444 35.737111 449.359449 
 127.188556 35.737111 444.955144 
 127.188778 35.737111 435.626980 
 127.189000 35.737111 425.657322 
 127.189111 35.737111 420.456249 
 127.189222 35.737111 415.118019 
 127.189333 35.737111 409.660744 
 127.188333 35.737111 453.575698 
 127.188444 35.737111 449.359449 
 127.188556 35.737111 444.955144 
 127.188667 35.737111 440.377353 
 127.188889 35.737111 430.719927 
 127.189111 35.737111 420.456249 
 127.189222 35.737111 415.118019 
 127.189333 35.737111 409.660744 
 127.189444 35.737111 404.085873 
 127.188333 35.737222 455.537224 
 127.188444 35.737222 451.386540 
 127.188556 35.737222 447.047513 
 127.188667 35.737222 442.534473 
 127.188889 35.737222 433.004615 
 127.189111 35.737222 422.864940 
 127.189222 35.737222 417.587062 
 127.189333 35.737222 412.188800 
 127.189444 35.737222 406.671571 
 127.188333 35.737333 457.557580 
 127.188444 35.737333 453.473331 
 127.188556 35.737333 449.200407 
 127.188667 35.737333 444.752896 
 127.188889 35.737333 435.352011 
 127.189111 35.737333 425.337541 
 127.189222 35.737333 420.120537 
 127.189333 35.737333 414.781758 
 127.189444 35.737333 409.322586 
 127.188444 35.737333 453.473331 
 127.188556 35.737333 449.200407 
 127.188667 35.737333 444.752896 
 127.188778 35.737333 440.131623 
 127.189000 35.737333 430.415111 
 127.189222 35.737333 420.120537 
 127.189333 35.737333 414.781758 
 127.189444 35.737333 409.322586 
 127.189556 35.737333 403.761561 
 127.188444 35.737444 455.611921 
 127.188556 35.737444 451.405660 
 127.188667 35.737444 447.024189 
 127.188778 35.737444 442.468298 
 127.189000 35.737444 432.879806 
 127.189222 35.737444 422.708747 
 127.189333 35.737444 417.429680 
 127.189444 35.737444 412.028748 
 127.189556 35.737444 406.524275 
 127.188444 35.737556 457.808885 
 127.188556 35.737556 453.670037 
 127.188667 35.737556 449.355310 
 127.188778 35.737556 444.865455 
 127.189000 35.737556 435.406142 
 127.189222 35.737556 425.359556 
 127.189333 35.737556 420.140602 
 127.189444 35.737556 414.798258 
 127.189556 35.737556 409.350633 
 127.188556 35.737556 453.670037 
 127.188667 35.737556 449.355310 
 127.188778 35.737556 444.865455 
 127.188889 35.737556 440.215407 
 127.189111 35.737556 430.453804 
 127.189333 35.737556 420.140602 
 127.189444 35.737556 414.798258 
 127.189556 35.737556 409.350633 
 127.189667 35.737556 403.799152 
 127.188556 35.737667 455.988916 
 127.188667 35.737667 451.741484 
 127.188778 35.737667 447.318170 
 127.188889 35.737667 442.733663 
 127.189111 35.737667 433.099792 
 127.189333 35.737667 422.908883 
 127.189444 35.737667 417.625342 
 127.189556 35.737667 412.234731 
 127.189667 35.737667 406.738445 
 127.188556 35.737778 458.357247 
 127.188667 35.737778 454.177506 
 127.188778 35.737778 449.821084 
 127.188889 35.737778 445.302423 
 127.189111 35.737778 435.796760 
 127.189333 35.737778 425.728438 
 127.189444 35.737778 420.503778 
 127.189556 35.737778 415.170216 
 127.189667 35.737778 409.729117 
 127.188667 35.737778 454.177506 
 127.188778 35.737778 449.821084 
 127.188889 35.737778 445.302423 
 127.189000 35.737778 440.622427 
 127.189222 35.737778 430.826515 
 127.189444 35.737778 420.503778 
 127.189556 35.737778 415.170216 
 127.189667 35.737778 409.729117 
 127.189778 35.737778 404.194565 
 127.188667 35.737889 456.670747 
 127.188778 35.737889 452.381760 
 127.188889 35.737889 447.929441 
 127.189000 35.737889 443.314656 
 127.189222 35.737889 433.645017 
 127.189444 35.737889 423.442209 
 127.189556 35.737889 418.165894 
 127.189667 35.737889 412.780129 
 127.189778 35.737889 407.298843 
 127.188667 35.738000 459.211578 
 127.188778 35.738000 454.990299 
 127.188889 35.738000 450.604551 
 127.189000 35.738000 446.055162 
 127.189222 35.738000 436.512036 
 127.189444 35.738000 426.429222 
 127.189556 35.738000 421.210123 
 127.189667 35.738000 415.879621 
 127.189778 35.738000 410.451486 
 127.188778 35.738111 457.654530 
 127.188889 35.738111 453.335773 
 127.189000 35.738111 448.852154 
 127.189111 35.738111 444.218614 
 127.189333 35.738111 434.520800 
 127.189556 35.738111 424.311986 
 127.189667 35.738111 419.036833 
 127.189778 35.738111 413.661888 
 127.189889 35.738111 408.201275 
 127.188778 35.738222 460.364100 
 127.188889 35.738222 456.112487 
 127.189000 35.738222 451.694749 
 127.189111 35.738222 447.125585 
 127.189333 35.738222 437.551674 
 127.189556 35.738222 427.459382 
 127.189667 35.738222 422.239443 
 127.189778 35.738222 416.917515 
 127.189889 35.738222 411.507578 
 127.188778 35.738333 463.127091 
 127.188889 35.738333 458.942969 
 127.189000 35.738333 454.591411 
 127.189111 35.738333 450.086877 
 127.189333 35.738333 440.637239 
 127.189556 35.738333 430.661655 
 127.189667 35.738333 425.496954 
 127.189778 35.738333 420.228022 
 127.189889 35.738333 414.868698 
 127.188889 35.738333 458.942969 
 127.189000 35.738333 454.591411 
 127.189111 35.738333 450.086877 
 127.189222 35.738333 445.430286 
 127.189444 35.738333 435.708827 
 127.189667 35.738333 425.496954 
 127.189778 35.738333 420.228022 
 127.189889 35.738333 414.868698 
 127.190000 35.738333 409.420355 
 127.188889 35.738444 461.816163 
 127.189000 35.738444 457.530823 
 127.189111 35.738444 453.090915 
 127.189222 35.738444 448.497325 
 127.189444 35.738444 438.896276 
 127.189667 35.738444 428.796610 
 127.189778 35.738444 423.580443 
 127.189889 35.738444 418.271464 
 127.190000 35.738444 412.871030 
 127.188889 35.738556 464.740586 
 127.189000 35.738556 460.521692 
 127.189111 35.738556 456.146592 
 127.189222 35.738556 451.616142 
 127.189444 35.738556 442.135647 
 127.189667 35.738556 432.148160 
 127.189778 35.738556 426.984678 
 127.189889 35.738556 421.725924 
 127.190000 35.738556 416.373238 
 127.189000 35.738556 460.521692 
 127.189111 35.738556 456.146592 
 127.189222 35.738556 451.616142 
 127.189333 35.738556 446.945483 
 127.189556 35.738556 437.202813 
 127.189778 35.738556 426.984678 
 127.189889 35.738556 421.725924 
 127.190000 35.738556 416.373238 
 127.190111 35.738556 410.944766 
 127.189000 35.738667 463.557540 
 127.189111 35.738667 459.247286 
 127.189222 35.738667 454.779972 
 127.189333 35.738667 450.170509 
 127.189556 35.738667 440.544118 
 127.189778 35.738667 430.433316 
 127.189889 35.738667 425.224552 
 127.190000 35.738667 419.919343 
 127.190111 35.738667 414.535674 
 127.189000 35.738778 466.631539 
 127.189111 35.738778 462.386020 
 127.189222 35.738778 457.981695 
 127.189333 35.738778 453.433248 
 127.189556 35.738778 443.922667 
 127.189778 35.738778 433.918597 
 127.189889 35.738778 428.759477 
 127.190000 35.738778 423.501369 
 127.190111 35.738778 418.162099 
 127.189111 35.738778 462.386020 
 127.189222 35.738778 457.981695 
 127.189333 35.738778 453.433248 
 127.189444 35.738778 448.741653 
 127.189667 35.738778 438.977419 
 127.189889 35.738778 428.759477 
 127.190000 35.738778 423.501369 
 127.190111 35.738778 418.162099 
 127.190222 35.738778 412.743054 
 127.189111 35.738889 465.572025 
 127.189222 35.738889 461.230725 
 127.189333 35.738889 456.743287 
 127.189444 35.738889 452.110659 
 127.189667 35.738889 442.457573 
 127.189889 35.738889 432.341079 
 127.190000 35.738889 427.129833 
 127.190111 35.738889 421.834688 
 127.190222 35.738889 416.457022 
 127.189111 35.739000 468.792738 
 127.189222 35.739000 464.514250 
 127.189333 35.739000 460.087575 
 127.189444 35.739000 455.513633 
 127.189667 35.739000 445.971044 
 127.189889 35.739000 435.955231 
 127.190000 35.739000 430.790423 
 127.190111 35.739000 425.538953 
 127.190222 35.739000 420.202192 
 127.189222 35.739000 464.514250 
 127.189333 35.739000 460.087575 
 127.189444 35.739000 455.513633 
 127.189556 35.739000 450.807761 
 127.189778 35.739000 441.015865 
 127.190000 35.739000 430.790423 
 127.190111 35.739000 425.538953 
 127.190222 35.739000 420.202192 
 127.190333 35.739000 414.798268 
 127.189222 35.739111 467.841883 
 127.189333 35.739111 463.475901 
 127.189444 35.739111 458.960538 
 127.189556 35.739111 454.310922 
 127.189778 35.739111 444.624356 
 127.190000 35.739111 434.493854 
 127.190111 35.739111 429.285737 
 127.190222 35.739111 423.989529 
 127.190333 35.739111 418.623224 
 127.189222 35.739222 471.200469 
 127.189333 35.739222 466.894870 
 127.189444 35.739222 462.437745 
 127.189556 35.739222 457.844017 
 127.189778 35.739222 448.261962 
 127.190000 35.739222 438.225483 
 127.190111 35.739222 433.060228 
 127.190222 35.739222 427.804059 
 127.190333 35.739222 422.474843 
 127.189333 35.739222 466.894870 
 127.189444 35.739222 462.437745 
 127.189556 35.739222 457.844017 
 127.189667 35.739222 453.114727 
 127.189889 35.739222 443.298462 
 127.190111 35.739222 433.060228 
 127.190222 35.739222 427.804059 
 127.190333 35.739222 422.474843 
 127.190444 35.739222 417.074013 
 127.189333 35.739333 470.354455 
 127.189444 35.739333 465.955399 
 127.189556 35.739333 461.417354 
 127.189667 35.739333 456.741340 
 127.189889 35.739333 447.023839 
 127.190111 35.739333 436.873445 
 127.190222 35.739333 431.656920 
 127.190333 35.739333 426.364370 
 127.190444 35.739333 420.997231 
 127.189333 35.739445 473.846972 
 127.189444 35.739445 469.505685 
 127.189556 35.739445 465.022994 
 127.189667 35.739445 460.399898 
 127.189889 35.739445 450.780363 
 127.190111 35.739445 440.716910 
 127.190222 35.739445 435.539546 
 127.190333 35.739445 430.283160 
 127.190444 35.739445 424.949187 
 127.189444 35.739445 469.505685 
 127.189556 35.739445 465.022994 
 127.189667 35.739445 460.399898 
 127.189778 35.739445 455.648195 
 127.190000 35.739445 445.797633 
 127.190222 35.739445 435.539546 
 127.190333 35.739445 430.283160 
 127.190444 35.739445 424.949187 
 127.190556 35.739445 419.555809 
 127.189444 35.739556 473.080532 
 127.189556 35.739556 468.652743 
 127.189667 35.739556 464.082091 
 127.189778 35.739556 459.380230 
 127.190000 35.739556 449.621150 
 127.190222 35.739556 439.443141 
 127.190333 35.739556 434.222335 
 127.190444 35.739556 428.920935 
 127.190556 35.739556 423.557024 
 127.189444 35.739667 476.690324 
 127.189556 35.739667 472.317148 
 127.189667 35.739667 467.798620 
 127.189778 35.739667 463.146251 
 127.190000 35.739667 453.477874 
 127.190222 35.739667 443.379060 
 127.190333 35.739667 438.193360 
 127.190444 35.739667 432.924034 
 127.190556 35.739667 427.589074 
 127.189556 35.739667 472.317148 
 127.189667 35.739667 467.798620 
 127.189778 35.739667 463.146251 
 127.189889 35.739667 458.372265 
 127.190111 35.739667 448.479691 
 127.190333 35.739667 438.193360 
 127.190444 35.739667 432.924034 
 127.190556 35.739667 427.589074 
 127.190667 35.739667 422.189992 
 127.189556 35.739778 476.001641 
 127.189667 35.739778 471.534712 
 127.189778 35.739778 466.931293 
 127.189889 35.739778 462.203484 
 127.190111 35.739778 452.394769 
 127.190333 35.739778 442.180469 
 127.190444 35.739778 436.942595 
 127.190556 35.739778 431.635957 
 127.190667 35.739778 426.262078 
 127.189556 35.739889 479.716901 
 127.189667 35.739889 475.301199 
 127.189778 35.739889 470.746333 
 127.189889 35.739889 466.064277 
 127.190111 35.739889 456.338507 
 127.190333 35.739889 446.195241 
 127.190444 35.739889 440.988293 
 127.190556 35.739889 435.709432 
 127.190667 35.739889 430.360196 
 127.189667 35.739889 475.301199 
 127.189778 35.739889 470.746333 
 127.189889 35.739889 466.064277 
 127.190000 35.739889 461.256224 
 127.190222 35.739889 451.312464 
 127.190444 35.739889 440.988293 
 127.190556 35.739889 435.709432 
 127.190667 35.739889 430.360196 
 127.190778 35.739889 424.958907 
 127.189667 35.740000 479.083086 
 127.189778 35.740000 474.576185 
 127.189889 35.740000 469.939282 
 127.190000 35.740000 465.173562 
 127.190222 35.740000 455.305594 
 127.190444 35.740000 445.045047 
 127.190556 35.740000 439.793315 
 127.190667 35.740000 434.468067 
 127.190778 35.740000 429.087571 
 127.189667 35.740111 482.891311 
 127.189778 35.740111 478.431930 
 127.189889 35.740111 473.839715 
 127.190000 35.740111 469.115842 
 127.190222 35.740111 459.322637 
 127.190444 35.740111 449.124622 
 127.190556 35.740111 443.899449 
 127.190667 35.740111 438.597611 
 127.190778 35.740111 433.237316 
 127.189778 35.740111 478.431930 
 127.189889 35.740111 473.839715 
 127.190000 35.740111 469.115842 
 127.190111 35.740111 464.276371 
 127.190333 35.740111 454.271566 
 127.190556 35.740111 443.899449 
 127.190667 35.740111 438.597611 
 127.190778 35.740111 433.237316 
 127.190889 35.740111 427.820189 
 127.189778 35.740222 482.298200 
 127.189889 35.740222 477.750033 
 127.190000 35.740222 473.067359 
 127.190111 35.740222 468.266103 
 127.190333 35.740222 458.328670 
 127.190556 35.740222 448.011501 
 127.190667 35.740222 442.732404 
 127.190778 35.740222 437.391644 
 127.190889 35.740222 431.990868 
 127.189778 35.740333 486.186158 
 127.189889 35.740333 481.681534 
 127.190000 35.740333 477.039533 
 127.190111 35.740333 472.275952 
 127.190333 35.740333 462.404769 
 127.190556 35.740333 452.141380 
 127.190667 35.740333 446.884425 
 127.190778 35.740333 441.562596 
 127.190889 35.740333 436.177560 
 127.189889 35.740333 481.681534 
 127.190000 35.740333 477.039533 
 127.190111 35.740333 472.275952 
 127.190222 35.740333 467.392127 
 127.190444 35.740333 457.315359 
 127.190667 35.740333 446.884425 
 127.190778 35.740333 441.562596 
 127.190889 35.740333 436.177560 
 127.191000 35.740333 430.747878 
 127.189889 35.740445 485.625314 
 127.190000 35.740445 481.023375 
 127.190111 35.740445 476.296847 
 127.190222 35.740445 471.447069 
 127.190444 35.740445 461.429076 
 127.190667 35.740445 451.044298 
 127.190778 35.740445 445.740755 
 127.190889 35.740445 440.370815 
 127.191000 35.740445 434.953017 
 127.189889 35.740556 489.572373 
 127.190000 35.740556 485.009798 
 127.190111 35.740556 480.319626 
 127.190222 35.740556 475.503195 
 127.190444 35.740556 465.542581 
 127.190667 35.740556 455.202582 
 127.190778 35.740556 449.916644 
 127.190889 35.740556 444.561129 
 127.191000 35.740556 439.154554 
 127.190000 35.740556 485.009798 
 127.190111 35.740556 480.319626 
 127.190222 35.740556 475.503195 
 127.190333 35.740556 470.577015 
 127.190556 35.740556 460.417230 
 127.190778 35.740556 449.916644 
 127.190889 35.740556 444.561129 
 127.191000 35.740556 439.154554 
 127.191111 35.740556 433.698682 
 127.190000 35.740667 489.010297 
 127.190111 35.740667 484.355892 
 127.190222 35.740667 479.572211 
 127.190333 35.740667 474.675666 
 127.190556 35.740667 464.565759 
 127.190778 35.740667 454.102346 
 127.190889 35.740667 448.760630 
 127.191000 35.740667 443.364655 
 127.191111 35.740667 437.916211 
 127.190000 35.740778 493.008890 
 127.190111 35.740778 488.389528 
 127.190222 35.740778 483.637874 
 127.190333 35.740778 478.770246 
 127.190556 35.740778 468.708802 
 127.190778 35.740778 458.281180 
 127.190889 35.740778 452.952590 
 127.191000 35.740778 447.566554 
 127.191111 35.740778 442.124892 
 127.190000 35.740889 497.017090 
 127.190111 35.740889 492.432155 
 127.190222 35.740889 487.711905 
 127.190333 35.740889 482.872567 
 127.190556 35.740889 472.858322 
 127.190778 35.740889 462.465225 
 127.190889 35.740889 457.149131 
 127.191000 35.740889 451.772409 
 127.191111 35.740889 446.336906 
 127.190111 35.740889 492.432155 
 127.190222 35.740889 487.711905 
 127.190333 35.740889 482.872567 
 127.190444 35.740889 477.915662 
 127.190667 35.740889 467.702215 
 127.190889 35.740889 457.149131 
 127.191000 35.740889 451.772409 
 127.191111 35.740889 446.336906 
 127.191222 35.740889 440.861521 
 127.190111 35.741000 496.467613 
 127.190222 35.741000 491.778026 
 127.190333 35.741000 486.966244 
 127.190444 35.741000 482.033799 
 127.190667 35.741000 471.859809 
 127.190889 35.741000 461.333526 
 127.191000 35.741000 455.965459 
 127.191111 35.741000 450.535476 
 127.191222 35.741000 445.062490 
 127.190111 35.741111 500.507517 
 127.190222 35.741111 495.847946 
 127.190333 35.741111 491.063072 
 127.190444 35.741111 486.154440 
 127.190667 35.741111 476.018619 
 127.190889 35.741111 465.517863 
 127.191000 35.741111 460.157826 
 127.191111 35.741111 454.732744 
 127.191222 35.741111 449.261548 
 127.190222 35.741111 495.847946 
 127.190333 35.741111 491.063072 
 127.190444 35.741111 486.154440 
 127.190556 35.741111 481.139054 
 127.190778 35.741111 470.810946 
 127.191000 35.741111 460.157826 
 127.191111 35.741111 454.732744 
 127.191222 35.741111 449.261548 
 127.191333 35.741111 443.746185 
 127.190222 35.741222 499.912369 
 127.190333 35.741222 495.153702 
 127.190444 35.741222 490.268185 
 127.190556 35.741222 485.272766 
 127.190778 35.741222 474.975168 
 127.191000 35.741222 464.339972 
 127.191111 35.741222 458.919166 
 127.191222 35.741222 453.449152 
 127.191333 35.741222 447.931913 
 127.190222 35.741333 503.962037 
 127.190333 35.741333 499.228822 
 127.190444 35.741333 494.365681 
 127.190556 35.741333 489.389506 
 127.190778 35.741333 479.121021 
 127.191000 35.741333 468.502432 
 127.191111 35.741333 463.085275 
 127.191222 35.741333 457.615839 
 127.191333 35.741333 452.096143 
 127.190333 35.741333 499.228822 
 127.190444 35.741333 494.365681 
 127.190556 35.741333 489.389506 
 127.190667 35.741333 484.302035 
 127.190889 35.741333 473.848337 
 127.191111 35.741333 463.085275 
 127.191222 35.741333 457.615839 
 127.191333 35.741333 452.096143 
 127.191444 35.741333 446.545506 
 127.190333 35.741445 503.300160 
 127.190444 35.741445 498.458727 
 127.190556 35.741445 493.501134 
 127.190667 35.741445 488.429139 
 127.190889 35.741445 477.997013 
 127.191111 35.741445 467.243110 
 127.191222 35.741445 461.773656 
 127.191333 35.741445 456.250922 
 127.191444 35.741445 450.694275 
 127.190333 35.741556 507.351430 
 127.190444 35.741556 502.530959 
 127.190556 35.741556 497.591221 
 127.190667 35.741556 492.533994 
 127.190889 35.741556 482.122090 
 127.191111 35.741556 471.376091 
 127.191222 35.741556 465.906031 
 127.191333 35.741556 460.379696 
 127.191444 35.741556 454.816504 
 127.190444 35.741556 502.530959 
 127.190556 35.741556 497.591221 
 127.190667 35.741556 492.533994 
 127.190778 35.741556 487.376975 
 127.191000 35.741556 476.787784 
 127.191222 35.741556 465.906031 
 127.191333 35.741556 460.379696 
 127.191444 35.741556 454.816504 
 127.191556 35.741556 449.218557 
 127.190444 35.741667 506.594096 
 127.190556 35.741667 501.671546 
 127.190667 35.741667 496.628429 
 127.190778 35.741667 491.482420 
 127.191000 35.741667 480.906028 
 127.191222 35.741667 470.024907 
 127.191333 35.741667 464.494405 
 127.191444 35.741667 458.924121 
 127.191556 35.741667 453.316197 
 127.190444 35.741778 510.631889 
 127.190556 35.741778 505.725798 
 127.190667 35.741778 500.696084 
 127.190778 35.741778 495.560405 
 127.191000 35.741778 484.995527 
 127.191222 35.741778 474.113864 
 127.191333 35.741778 468.578652 
 127.191444 35.741778 463.000761 
 127.191556 35.741778 457.382378 
 127.190556 35.741778 505.725798 
 127.190667 35.741778 500.696084 
 127.190778 35.741778 495.560405 
 127.190889 35.741778 490.320734 
 127.191111 35.741778 479.586878 
 127.191333 35.741778 468.578652 
 127.191444 35.741778 463.000761 
 127.191556 35.741778 457.382378 
 127.191667 35.741778 451.743275 
 127.190556 35.741889 509.765646 
 127.190667 35.741889 504.748677 
 127.190778 35.741889 499.622684 
 127.190889 35.741889 494.389666 
 127.191111 35.741889 483.660065 
 127.191333 35.741889 472.644244 
 127.191444 35.741889 467.058219 
 127.191556 35.741889 461.428869 
 127.191667 35.741889 455.776045 
 127.190556 35.742000 513.781816 
 127.190667 35.742000 508.776911 
 127.190778 35.742000 503.659945 
 127.190889 35.742000 498.432943 
 127.191111 35.742000 487.706401 
 127.191333 35.742000 476.681892 
 127.191444 35.742000 471.087228 
 127.191556 35.742000 465.446433 
 127.191667 35.742000 459.779439 
 127.190667 35.742000 508.776911 
 127.190778 35.742000 503.659945 
 127.190889 35.742000 498.432943 
 127.191000 35.742000 493.114376 
 127.191222 35.742000 482.228160 
 127.191444 35.742000 471.087228 
 127.191556 35.742000 465.446433 
 127.191667 35.742000 459.779439 
 127.191778 35.742000 454.088484 
 127.190667 35.742111 512.771668 
 127.190778 35.742111 507.663060 
 127.190889 35.742111 502.441434 
 127.191000 35.742111 497.125273 
 127.191222 35.742111 486.235086 
 127.191444 35.742111 475.078730 
 127.191556 35.742111 469.426048 
 127.191667 35.742111 463.744476 
 127.191778 35.742111 458.036295 
 127.190667 35.742222 516.744452 
 127.190778 35.742222 511.643565 
 127.190889 35.742222 506.426699 
 127.191000 35.742222 501.112350 
 127.191222 35.742222 490.217072 
 127.191444 35.742222 479.044273 
 127.191556 35.742222 473.379233 
 127.191667 35.742222 467.682638 
 127.191778 35.742222 461.956813 
 127.190778 35.742222 511.643565 
 127.190889 35.742222 506.426699 
 127.191000 35.742222 501.112350 
 127.191111 35.742222 495.702736 
 127.191333 35.742222 484.657668 
 127.191556 35.742222 473.379233 
 127.191667 35.742222 467.682638 
 127.191778 35.742222 461.956813 
 127.191889 35.742222 456.221990 
 127.190778 35.742333 515.585557 
 127.190889 35.742333 510.372824 
 127.191000 35.742333 505.059694 
 127.191111 35.742333 499.648415 
 127.191333 35.742333 488.591522 
 127.191556 35.742333 477.290246 
 127.191667 35.742333 471.578249 
 127.191778 35.742333 465.834439 
 127.191889 35.742333 460.079148 
 127.190778 35.742444 519.500397 
 127.190889 35.742444 514.291189 
 127.191000 35.742444 508.978697 
 127.191111 35.742444 503.565198 
 127.191333 35.742444 492.495447 
 127.191556 35.742444 481.170411 
 127.191667 35.742444 475.442596 
 127.191778 35.742444 469.680413 
 127.191889 35.742444 463.904295 
 127.190889 35.742444 514.291189 
 127.191000 35.742444 508.978697 
 127.191111 35.742444 503.565198 
 127.191222 35.742444 498.069988 
 127.191444 35.742444 486.861446 
 127.191667 35.742444 475.442596 
 127.191778 35.742444 469.680413 
 127.191889 35.742444 463.904295 
 127.192000 35.742444 458.116580 
 127.190889 35.742555 518.166151 
 127.191000 35.742555 512.853720 
 127.191111 35.742555 507.437462 
 127.191222 35.742555 501.936713 
 127.191444 35.742555 490.708922 
 127.191667 35.742555 479.260299 
 127.191778 35.742555 473.479434 
 127.191889 35.742555 467.682221 
 127.192000 35.742555 461.871040 
 127.190889 35.742667 522.008884 
 127.191000 35.742667 516.695948 
 127.191111 35.742667 511.276391 
 127.191222 35.742667 505.769593 
 127.191444 35.742667 494.521624 
 127.191667 35.742667 483.042423 
 127.191778 35.742667 477.242519 
 127.191889 35.742667 471.423885 
 127.192000 35.742667 465.588946 
 127.191000 35.742667 516.695948 
 127.191111 35.742667 511.276391 
 127.191222 35.742667 505.769593 
 127.191333 35.742667 500.178004 
 127.191556 35.742667 488.802956 
 127.191778 35.742667 477.242519 
 127.191889 35.742667 471.423885 
 127.192000 35.742667 465.588946 
 127.192111 35.742667 459.758350 
 127.191000 35.742778 520.490051 
 127.191111 35.742778 515.066678 
 127.191222 35.742778 509.553354 
 127.191333 35.742778 503.952564 
 127.191556 35.742778 492.551322 
 127.191778 35.742778 480.954704 
 127.191889 35.742778 475.114415 
 127.192000 35.742778 469.255524 
 127.192111 35.742778 463.398798 
 127.191000 35.742889 524.246985 
 127.191111 35.742889 518.819275 
 127.191222 35.742889 513.298937 
 127.191333 35.742889 507.688488 
 127.191556 35.742889 496.260238 
 127.191778 35.742889 484.626757 
 127.191889 35.742889 478.764523 
 127.192000 35.742889 472.881423 
 127.192111 35.742889 466.998343 
 127.191111 35.742889 518.819275 
 127.191222 35.742889 513.298937 
 127.191333 35.742889 507.688488 
 127.191444 35.742889 502.008062 
 127.191667 35.742889 490.465610 
 127.191889 35.742889 478.764523 
 127.192000 35.742889 472.881423 
 127.192111 35.742889 466.998343 
 127.192222 35.742889 461.117664 
 127.191111 35.743000 522.525550 
 127.191222 35.743000 516.997731 
 127.191333 35.743000 511.377196 
 127.191444 35.743000 505.684146 
 127.191667 35.743000 494.109031 
 127.191889 35.743000 482.365852 
 127.192000 35.743000 476.458345 
 127.192111 35.743000 470.548751 
 127.192222 35.743000 464.639496 
 127.191111 35.743111 526.177218 
 127.191222 35.743111 520.641479 
 127.191333 35.743111 515.010461 
 127.191444 35.743111 509.304434 
 127.191667 35.743111 497.696081 
 127.191889 35.743111 485.910408 
 127.192000 35.743111 479.978358 
 127.192111 35.743111 474.042157 
 127.192222 35.743111 468.104274 
 127.191222 35.743111 520.641479 
 127.191333 35.743111 515.010461 
 127.191444 35.743111 509.304434 
 127.191556 35.743111 503.526051 
 127.191778 35.743111 491.817182 
 127.192000 35.743111 479.978358 
 127.192111 35.743111 474.042157 
 127.192222 35.743111 468.104274 
 127.192333 35.743111 462.185691 
 127.191222 35.743222 524.240726 
 127.191333 35.743222 518.598806 
 127.191444 35.743222 512.879419 
 127.191556 35.743222 507.085255 
 127.191778 35.743222 495.337864 
 127.192000 35.743222 483.451697 
 127.192111 35.743222 477.488723 
 127.192222 35.743222 471.522081 
 127.192333 35.743222 465.572885 
 127.191222 35.743333 527.781142 
 127.191333 35.743333 522.127953 
 127.191444 35.743333 516.394884 
 127.191556 35.743333 510.584662 
 127.191778 35.743333 498.798329 
 127.192000 35.743333 486.864581 
 127.192111 35.743333 480.874778 
 127.192222 35.743333 474.879365 
 127.192333 35.743333 468.899587 
 127.191333 35.743333 522.127953 
 127.191444 35.743333 516.394884 
 127.191556 35.743333 510.584662 
 127.191667 35.743333 504.718231 
 127.191889 35.743333 492.846219 
 127.192111 35.743333 480.874778 
 127.192222 35.743333 474.879365 
 127.192333 35.743333 468.899587 
 127.192444 35.743333 462.937802 
 127.191333 35.743444 525.608130 
 127.191444 35.743444 519.861025 
 127.191556 35.743444 514.034430 
 127.191667 35.743444 508.149375 
 127.191889 35.743444 496.233586 
 127.192111 35.743444 484.210182 
 127.192222 35.743444 478.185908 
 127.192333 35.743444 472.175494 
 127.192444 35.743444 466.181338 
 127.191333 35.743555 529.025500 
 127.191444 35.743555 523.264068 
 127.191556 35.743555 517.420854 
 127.191667 35.743555 511.516979 
 127.191889 35.743555 499.557158 
 127.192111 35.743555 487.481716 
 127.192222 35.743555 481.428609 
 127.192333 35.743555 475.387631 
 127.192444 35.743555 469.361219 
 127.191444 35.743555 523.264068 
 127.191556 35.743555 517.420854 
 127.191667 35.743555 511.516979 
 127.191778 35.743555 505.555256 
 127.192000 35.743555 493.525444 
 127.192222 35.743555 481.428609 
 127.192333 35.743555 475.387631 
 127.192444 35.743555 469.361219 
 127.192556 35.743555 463.370567 
 127.191444 35.743667 526.613893 
 127.191556 35.743667 520.753777 
 127.191667 35.743667 514.830835 
 127.191778 35.743667 508.847921 
 127.192000 35.743667 496.769703 
 127.192222 35.743667 484.616927 
 127.192333 35.743667 478.545371 
 127.192444 35.743667 472.486727 
 127.192556 35.743667 466.462328 
 127.191444 35.743778 529.902796 
 127.191556 35.743778 524.025536 
 127.191667 35.743778 518.083333 
 127.191778 35.743778 512.079076 
 127.192000 35.743778 499.952279 
 127.192222 35.743778 487.743560 
 127.192333 35.743778 481.641487 
 127.192444 35.743778 475.550711 
 127.192556 35.743778 469.492703 
 127.191556 35.743778 524.025536 
 127.191667 35.743778 518.083333 
 127.191778 35.743778 512.079076 
 127.191889 35.743778 506.034446 
 127.192111 35.743778 493.854413 
 127.192333 35.743778 481.641487 
 127.192444 35.743778 475.550711 
 127.192556 35.743778 469.492703 
 127.192667 35.743778 463.469712 
 127.191556 35.743889 527.228930 
 127.191667 35.743889 521.267322 
 127.191778 35.743889 515.241626 
 127.191889 35.743889 509.173626 
 127.192111 35.743889 496.941295 
 127.192333 35.743889 484.669212 
 127.192444 35.743889 478.546481 
 127.192556 35.743889 472.455083 
 127.192667 35.743889 466.397303 
 127.191556 35.744000 530.373286 
 127.191667 35.744000 524.392078 
 127.191778 35.744000 518.344789 
 127.191889 35.744000 512.253310 
 127.192111 35.744000 499.968582 
 127.192333 35.744000 487.637400 
 127.192444 35.744000 481.482800 
 127.192556 35.744000 475.358136 
 127.192667 35.744000 469.265728 
 127.191667 35.744000 524.392078 
 127.191778 35.744000 518.344789 
 127.191889 35.744000 512.253310 
 127.192000 35.744000 506.120551 
 127.192222 35.744000 493.800191 
 127.192444 35.744000 481.482800 
 127.192556 35.744000 475.358136 
 127.192667 35.744000 469.265728 
 127.192778 35.744000 463.226821 
 127.191667 35.744111 527.445224 
 127.191778 35.744111 521.376283 
 127.191889 35.744111 515.261312 
 127.192000 35.744111 509.103258 
 127.192222 35.744111 496.727279 
 127.192444 35.744111 484.348076 
 127.192556 35.744111 478.190405 
 127.192667 35.744111 472.063669 
 127.192778 35.744111 465.989254 
 127.191667 35.744222 530.435669 
 127.191778 35.744222 524.344959 
 127.191889 35.744222 518.206422 
 127.192000 35.744222 512.023041 
 127.192222 35.744222 499.591503 
 127.192444 35.744222 487.150705 
 127.192556 35.744222 480.960193 
 127.192667 35.744222 474.799332 
 127.192778 35.744222 468.689647 
 127.191778 35.744222 524.344959 
 127.191889 35.744222 518.206422 
 127.192000 35.744222 512.023041 
 127.192111 35.744222 505.817114 
 127.192333 35.744222 493.368479 
 127.192556 35.744222 480.960193 
 127.192667 35.744222 474.799332 
 127.192778 35.744222 468.689647 
 127.192889 35.744222 462.633184 
 127.191778 35.744333 527.239079 
 127.191889 35.744333 521.077002 
 127.192000 35.744333 514.868367 
 127.192111 35.744333 508.635588 
 127.192333 35.744333 496.128676 
 127.192556 35.744333 483.656582 
 127.192667 35.744333 477.461936 
 127.192778 35.744333 471.317363 
 127.192889 35.744333 465.224936 
 127.191778 35.744444 530.067111 
 127.191889 35.744444 523.881456 
 127.192000 35.744444 517.647572 
 127.192111 35.744444 511.387988 
 127.192333 35.744444 498.823019 
 127.192556 35.744444 486.287494 
 127.192667 35.744444 480.059309 
 127.192778 35.744444 473.880126 
 127.192889 35.744444 467.752050 
 127.191889 35.744444 523.881456 
 127.192000 35.744444 517.647572 
 127.192111 35.744444 511.387988 
 127.192222 35.744444 505.105631 
 127.192444 35.744444 492.542882 
 127.192667 35.744444 480.059309 
 127.192778 35.744444 473.880126 
 127.192889 35.744444 467.752050 
 127.193000 35.744444 461.696185 
 127.191889 35.744556 526.613347 
 127.192000 35.744556 520.354283 
 127.192111 35.744556 514.068007 
 127.192222 35.744556 507.757480 
 127.192444 35.744556 495.134349 
 127.192667 35.744556 482.585508 
 127.192778 35.744556 476.372077 
 127.192889 35.744556 470.208750 
 127.193000 35.744556 464.116768 
 127.191889 35.744667 529.266785 
 127.192000 35.744667 522.982670 
 127.192111 35.744667 516.669880 
 127.192222 35.744667 510.331407 
 127.192444 35.744667 497.648479 
 127.192667 35.744667 485.035127 
 127.192778 35.744667 478.787886 
 127.192889 35.744667 472.589784 
 127.193000 35.744667 466.462199 
 127.192000 35.744778 525.540459 
 127.192111 35.744778 519.201260 
 127.192222 35.744778 512.834988 
 127.192333 35.744778 506.464521 
 127.192556 35.744778 493.742124 
 127.192778 35.744778 481.134681 
 127.192889 35.744778 474.902181 
 127.193000 35.744778 468.739402 
 127.193111 35.744778 462.648106 
 127.192000 35.744889 528.017589 
 127.192111 35.744889 521.652194 
 127.192222 35.744889 515.258386 
 127.192333 35.744889 508.859157 
 127.192556 35.744889 496.075772 
 127.192778 35.744889 483.403259 
 127.192889 35.744889 477.136874 
 127.193000 35.744889 470.939449 
 127.193111 35.744889 464.812771 
 127.192000 35.745000 530.421360 
 127.192111 35.745000 524.029913 
 127.192222 35.745000 517.608753 
 127.192333 35.745000 511.180990 
 127.192556 35.745000 498.337189 
 127.192778 35.745000 485.600333 
 127.192889 35.745000 479.300478 
 127.193000 35.745000 473.068856 
 127.193111 35.745000 466.907275 
 127.192111 35.745000 524.029913 
 127.192222 35.745000 517.608753 
 127.192333 35.745000 511.180990 
 127.192444 35.745000 504.749502 
 127.192667 35.745000 491.946650 
 127.192889 35.745000 479.300478 
 127.193000 35.745000 473.068856 
 127.193111 35.745000 466.907275 
 127.193222 35.745000 460.836606 
 127.192111 35.745111 526.325086 
 127.192222 35.745111 519.876874 
 127.192333 35.745111 513.420918 
 127.192444 35.745111 506.960129 
 127.192667 35.745111 494.095723 
 127.192889 35.745111 481.384528 
 127.193000 35.745111 475.119292 
 127.193111 35.745111 468.923427 
 127.193222 35.745111 462.817930 
 127.192111 35.745222 528.544506 
 127.192222 35.745222 522.069462 
 127.192333 35.745222 515.585580 
 127.192444 35.745222 509.095793 
 127.192667 35.745222 496.170561 
 127.192889 35.745222 483.395214 
 127.193000 35.745222 477.096851 
 127.193111 35.745222 470.867218 
 127.193222 35.745222 464.727440 
 127.192222 35.745222 522.069462 
 127.192333 35.745222 515.585580 
 127.192444 35.745222 509.095793 
 127.192556 35.745222 502.623237 
 127.192778 35.745222 489.760457 
 127.193000 35.745222 477.096851 
 127.193111 35.745222 470.867218 
 127.193222 35.745222 464.727440 
 127.193333 35.745222 458.678862 
 127.192222 35.745333 524.177944 
 127.192333 35.745333 517.666512 
 127.192444 35.745333 511.148151 
 127.192556 35.745333 504.646110 
 127.192778 35.745333 491.721820 
 127.193000 35.745333 478.993817 
 127.193111 35.745333 472.731068 
 127.193222 35.745333 466.557689 
 127.193333 35.745333 460.475042 
 127.192222 35.745444 526.208583 
 127.192333 35.745444 519.669903 
 127.192444 35.745444 513.123310 
 127.192556 35.745444 506.592164 
 127.192778 35.745444 493.607237 
 127.193000 35.745444 480.815849 
 127.193111 35.745444 474.520536 
 127.193222 35.745444 468.314138 
 127.193333 35.745444 462.198032 
 127.192333 35.745444 519.669903 
 127.192444 35.745444 513.123310 
 127.192556 35.745444 506.592164 
 127.192667 35.745444 500.079164 
 127.192889 35.745444 487.178712 
 127.193111 35.745444 474.520536 
 127.193222 35.745444 468.314138 
 127.193333 35.745444 462.198032 
 127.193444 35.745444 456.192481 
 127.192333 35.745556 521.591175 
 127.192444 35.745556 515.016757 
 127.192556 35.745556 508.456956 
 127.192667 35.745556 501.914492 
 127.192889 35.745556 488.953046 
 127.193111 35.745556 476.231538 
 127.193222 35.745556 469.992777 
 127.193333 35.745556 463.843896 
 127.193444 35.745556 457.805274 
 127.192333 35.745667 523.426365 
 127.192444 35.745667 516.824595 
 127.192556 35.745667 510.236652 
 127.192667 35.745667 503.665278 
 127.192889 35.745667 490.644058 
 127.193111 35.745667 477.860577 
 127.193222 35.745667 471.590177 
 127.193333 35.745667 465.409276 
 127.193444 35.745667 459.338361 
 127.192444 35.745667 516.824595 
 127.192556 35.745667 510.236652 
 127.192667 35.745667 503.665278 
 127.192778 35.745667 497.133623 
 127.193000 35.745667 484.219068 
 127.193222 35.745667 471.590177 
 127.193333 35.745667 465.409276 
 127.193444 35.745667 459.338361 
 127.193556 35.745667 453.378263 
 127.192444 35.745778 518.552238 
 127.192556 35.745778 511.936586 
 127.192667 35.745778 505.336772 
 127.192778 35.745778 498.776056 
 127.193000 35.745778 485.801676 
 127.193222 35.745778 473.111140 
 127.193333 35.745778 466.898875 
 127.193444 35.745778 460.796351 
 127.193556 35.745778 454.804404 
 127.192444 35.745889 520.192997 
 127.192556 35.745889 513.550180 
 127.192667 35.745889 506.922510 
 127.192778 35.745889 500.333353 
 127.193000 35.745889 487.300496 
 127.193222 35.745889 474.549788 
 127.193333 35.745889 468.306940 
 127.193444 35.745889 462.173610 
 127.193556 35.745889 456.150643 
 127.192556 35.745889 513.550180 
 127.192667 35.745889 506.922510 
 127.192778 35.745889 500.333353 
 127.192889 35.745889 493.785114 
 127.193111 35.745889 480.881450 
 127.193333 35.745889 468.306940 
 127.193444 35.745889 462.173610 
 127.193556 35.745889 456.150643 
 127.193667 35.745889 450.257443 
 127.192556 35.746000 515.082297 
 127.192667 35.746000 508.427274 
 127.192778 35.746000 501.810215 
 127.192889 35.746000 495.233540 
 127.193111 35.746000 482.271729 
 127.193333 35.746000 469.637728 
 127.193444 35.746000 463.474303 
 127.193556 35.746000 457.421051 
 127.193667 35.746000 451.497473 
 127.192556 35.746111 516.527036 
 127.192667 35.746111 509.845273 
 127.192778 35.746111 503.200960 
 127.192889 35.746111 496.596534 
 127.193111 35.746111 483.578038 
 127.193333 35.746111 470.886127 
 127.193444 35.746111 464.693434 
 127.193556 35.746111 458.610745 
 127.193667 35.746111 452.657659 
 127.192667 35.746111 509.845273 
 127.192778 35.746111 503.200960 
 127.192889 35.746111 496.596534 
 127.193000 35.746111 490.054900 
 127.193222 35.746111 477.187964 
 127.193444 35.746111 464.693434 
 127.193556 35.746111 458.610745 
 127.193667 35.746111 452.657659 
 127.193778 35.746111 446.834390 
 127.192667 35.746222 511.180816 
 127.192778 35.746222 504.509818 
 127.192889 35.746222 497.878241 
 127.193000 35.746222 491.309091 
 127.193222 35.746222 478.386154 
 127.193444 35.746222 465.834717 
 127.193556 35.746222 459.723350 
 127.193667 35.746222 453.741534 
 127.193778 35.746222 447.889485 
 127.192667 35.746333 512.430867 
 127.192778 35.746333 505.733813 
 127.192889 35.746333 499.075750 
 127.193000 35.746333 492.479778 
 127.193222 35.746333 479.502318 
 127.193444 35.746333 466.895550 
 127.193556 35.746333 460.756328 
 127.193667 35.746333 454.746622 
 127.193778 35.746333 448.866649 
 127.192778 35.746333 505.733813 
 127.192889 35.746333 499.075750 
 127.193000 35.746333 492.479778 
 127.193111 35.746333 485.947898 
 127.193333 35.746333 473.144503 
 127.193556 35.746333 460.756328 
 127.193667 35.746333 454.746622 
 127.193778 35.746333 448.866649 
 127.193889 35.746333 443.134707 
 127.192778 35.746444 506.870607 
 127.192889 35.746444 500.186777 
 127.193000 35.746444 493.564735 
 127.193111 35.746444 487.006490 
 127.193333 35.746444 474.149759 
 127.193556 35.746444 461.707732 
 127.193667 35.746444 455.671031 
 127.193778 35.746444 449.764048 
 127.193889 35.746444 444.005162 
 127.192778 35.746556 507.923706 
 127.192889 35.746556 501.214754 
 127.193000 35.746556 494.567314 
 127.193111 35.746556 487.983405 
 127.193333 35.746556 475.074818 
 127.193556 35.746556 462.580508 
 127.193667 35.746556 456.517625 
 127.193778 35.746556 450.584458 
 127.193889 35.746556 444.799471 
 127.192889 35.746556 501.214754 
 127.193000 35.746556 494.567314 
 127.193111 35.746556 487.983405 
 127.193222 35.746556 481.485413 
 127.193444 35.746556 468.772891 
 127.193667 35.746556 456.517625 
 127.193778 35.746556 450.584458 
 127.193889 35.746556 444.799471 
 127.194000 35.746556 439.162176 
 127.192889 35.746667 502.155806 
 127.193000 35.746667 495.483740 
 127.193111 35.746667 488.874969 
 127.193222 35.746667 482.351961 
 127.193444 35.746667 469.589049 
 127.193667 35.746667 457.283219 
 127.193778 35.746667 451.324797 
 127.193889 35.746667 445.514645 
 127.194000 35.746667 439.852276 
 127.192889 35.746778 503.012881 
 127.193000 35.746778 496.316886 
 127.193111 35.746778 489.683977 
 127.193222 35.746778 483.136704 
 127.193444 35.746778 470.324971 
 127.193667 35.746778 457.970223 
 127.193778 35.746778 451.987391 
 127.193889 35.746778 446.152935 
 127.194000 35.746778 440.466362 
 127.193000 35.746778 496.316886 
 127.193111 35.746778 489.683977 
 127.193222 35.746778 483.136704 
 127.193333 35.746778 476.676558 
 127.193556 35.746778 464.082822 
 127.193778 35.746778 451.987391 
 127.193889 35.746778 446.152935 
 127.194000 35.746778 440.466362 
 127.194111 35.746778 434.944626 
 127.193000 35.746889 497.063657 
 127.193111 35.746889 490.407429 
 127.193222 35.746889 483.836734 
 127.193333 35.746889 477.353066 
 127.193556 35.746889 464.712214 
 127.193778 35.746889 452.569790 
 127.193889 35.746889 446.711978 
 127.194000 35.746889 441.002161 
 127.194111 35.746889 435.457358 
 127.193000 35.747000 497.726444 
 127.193111 35.747000 491.047643 
 127.193222 35.747000 484.454296 
 127.193333 35.747000 477.947899 
 127.193556 35.747000 465.261577 
 127.193778 35.747000 453.073871 
 127.193889 35.747000 447.193577 
 127.194000 35.747000 441.461399 
 127.194111 35.747000 435.894422 
 127.193111 35.747000 491.047643 
 127.193222 35.747000 484.454296 
 127.193333 35.747000 477.947899 
 127.193444 35.747000 471.550033 
 127.193667 35.747000 459.102786 
 127.193889 35.747000 447.193577 
 127.194000 35.747000 441.461399 
 127.194111 35.747000 435.894422 
 127.194222 35.747000 430.491388 
 127.193111 35.747111 491.602296 
 127.193222 35.747111 484.987154 
 127.193333 35.747111 478.458908 
 127.193444 35.747111 472.039207 
 127.193667 35.747111 459.548399 
 127.193889 35.747111 447.595998 
 127.194000 35.747111 441.842426 
 127.194111 35.747111 436.254245 
 127.194222 35.747111 430.830190 
 127.193111 35.747222 492.073223 
 127.193222 35.747222 485.437074 
 127.193333 35.747222 478.887790 
 127.193444 35.747222 472.447084 
 127.193667 35.747222 459.914424 
 127.193889 35.747222 447.920594 
 127.194000 35.747222 442.146524 
 127.194111 35.747222 436.538041 
 127.194222 35.747222 431.093872 
 127.193222 35.747222 485.437074 
 127.193333 35.747222 478.887790 
 127.193444 35.747222 472.447084 
 127.193556 35.747222 466.115834 
 127.193778 35.747222 453.843054 
 127.194000 35.747222 442.146524 
 127.194111 35.747222 436.538041 
 127.194222 35.747222 431.093872 
 127.194333 35.747222 425.829415 
 127.193222 35.747333 485.803050 
 127.193333 35.747333 479.233583 
 127.193444 35.747333 472.772746 
 127.193556 35.747333 466.421414 
 127.193778 35.747333 454.108789 
 127.194000 35.747333 442.372984 
 127.194111 35.747333 436.745143 
 127.194222 35.747333 431.281807 
 127.194333 35.747333 425.998423 
 127.193222 35.747444 486.084699 
 127.193333 35.747444 479.495942 
 127.193444 35.747444 473.015885 
 127.193556 35.747444 466.645400 
 127.193778 35.747444 454.294824 
 127.194000 35.747444 442.521677 
 127.194111 35.747444 436.875452 
 127.194222 35.747444 431.393929 
 127.194333 35.747444 426.092599 
 127.193333 35.747444 479.495942 
 127.193444 35.747444 473.015885 
 127.193556 35.747444 466.645400 
 127.193667 35.747444 460.404982 
 127.193889 35.747444 448.333900 
 127.194111 35.747444 436.875452 
 127.194222 35.747444 431.393929 
 127.194333 35.747444 426.092599 
 127.194444 35.747444 420.969384 
 127.193333 35.747556 479.675855 
 127.193444 35.747556 473.177427 
 127.193556 35.747556 466.788654 
 127.193667 35.747556 460.530082 
 127.193889 35.747556 448.423123 
 127.194111 35.747556 436.929520 
 127.194222 35.747556 431.430727 
 127.194333 35.747556 426.112369 
 127.194444 35.747556 420.972356 
 127.193333 35.747667 479.772832 
 127.193444 35.747667 473.256951 
 127.193556 35.747667 466.850821 
 127.193667 35.747667 460.575039 
 127.193889 35.747667 448.434121 
 127.194111 35.747667 436.907308 
 127.194222 35.747667 431.392222 
 127.194333 35.747667 426.057814 
 127.194444 35.747667 420.901978 
 127.193444 35.747667 473.256951 
 127.193556 35.747667 466.850821 
 127.193667 35.747667 460.575039 
 127.193778 35.747667 454.429782 
 127.194000 35.747667 442.587501 
 127.194222 35.747667 431.392222 
 127.194333 35.747667 426.057814 
 127.194444 35.747667 420.901978 
 127.194556 35.747667 415.938367 
 127.193444 35.747778 473.254909 
 127.193556 35.747778 466.832298 
 127.193667 35.747778 460.540193 
 127.193778 35.747778 454.378764 
 127.194000 35.747778 442.504702 
 127.194222 35.747778 431.278471 
 127.194333 35.747778 425.928933 
 127.194444 35.747778 420.758195 
 127.194556 35.747778 415.779941 
 127.193444 35.747889 473.171535 
 127.193556 35.747889 466.733377 
 127.193667 35.747889 460.425895 
 127.193778 35.747889 454.249247 
 127.194000 35.747889 442.345334 
 127.194222 35.747889 431.090093 
 127.194333 35.747889 425.726397 
 127.194444 35.747889 420.541726 
 127.194556 35.747889 415.549795 
 127.193556 35.747889 466.733377 
 127.193667 35.747889 460.425895 
 127.193778 35.747889 454.249247 
 127.193889 35.747889 448.222585 
 127.194111 35.747889 436.634951 
 127.194333 35.747889 425.726397 
 127.194444 35.747889 420.541726 
 127.194556 35.747889 415.549795 
 127.194667 35.747889 410.747669 
 127.193556 35.748000 466.553991 
 127.193667 35.748000 460.232023 
 127.193778 35.748000 454.041061 
 127.193889 35.748000 448.000290 
 127.194111 35.748000 436.385049 
 127.194333 35.748000 425.449777 
 127.194444 35.748000 420.252094 
 127.194556 35.748000 415.247400 
 127.194667 35.748000 410.432745 
 127.193556 35.748111 466.294558 
 127.193667 35.748111 459.959026 
 127.193778 35.748111 453.754679 
 127.193889 35.748111 447.700734 
 127.194111 35.748111 436.059771 
 127.194333 35.748111 425.099670 
 127.194444 35.748111 419.889915 
 127.194556 35.748111 414.873394 
 127.194667 35.748111 410.047140 
 127.193667 35.748111 459.959026 
 127.193778 35.748111 453.754679 
 127.193889 35.748111 447.700734 
 127.194000 35.748111 441.796592 
 127.194222 35.748111 430.488900 
 127.194444 35.748111 419.889915 
 127.194556 35.748111 414.873394 
 127.194667 35.748111 410.047140 
 127.194778 35.748111 405.422912 
 127.193667 35.748222 459.607937 
 127.193778 35.748222 453.391156 
 127.193889 35.748222 447.324991 
 127.194000 35.748222 441.408834 
 127.194222 35.748222 430.077782 
 127.194444 35.748222 419.456343 
 127.194556 35.748222 414.428945 
 127.194667 35.748222 409.592036 
 127.194778 35.748222 404.957390 
 127.193667 35.748333 459.177951 
 127.193778 35.748333 452.949642 
 127.193889 35.748333 446.872170 
 127.194000 35.748333 440.944912 
 127.194222 35.748333 429.592335 
 127.194444 35.748333 418.950271 
 127.194556 35.748333 413.912903 
 127.194667 35.748333 409.066240 
 127.194778 35.748333 404.422070 
 127.193778 35.748333 452.949642 
 127.193889 35.748333 446.872170 
 127.194000 35.748333 440.944912 
 127.194111 35.748333 435.185434 
 127.194333 35.748333 424.181347 
 127.194556 35.748333 413.912903 
 127.194667 35.748333 409.066240 
 127.194778 35.748333 404.422070 
 127.194889 35.748333 399.976594 
 127.193778 35.748444 452.432099 
 127.193889 35.748444 446.344267 
 127.194000 35.748444 440.406861 
 127.194111 35.748444 434.637463 
 127.194333 35.748444 423.614196 
 127.194556 35.748444 413.327458 
 127.194667 35.748444 408.471971 
 127.194778 35.748444 403.819197 
 127.194889 35.748444 399.365317 
 127.193778 35.748556 451.837233 
 127.193889 35.748556 445.739949 
 127.194000 35.748556 439.793307 
 127.194111 35.748556 434.014902 
 127.194333 35.748556 422.974279 
 127.194556 35.748556 412.671052 
 127.194667 35.748556 407.807634 
 127.194778 35.748556 403.147138 
 127.194889 35.748556 398.685729 
 127.193889 35.748556 445.739949 
 127.194000 35.748556 439.793307 
 127.194111 35.748556 434.014902 
 127.194222 35.748556 428.403307 
 127.194444 35.748556 417.725588 
 127.194667 35.748556 407.807634 
 127.194778 35.748556 403.147138 
 127.194889 35.748556 398.685729 
 127.195000 35.748556 394.433159 
 127.193889 35.748667 445.061817 
 127.194000 35.748667 439.106878 
 127.194111 35.748667 433.320406 
 127.194222 35.748667 427.700957 
 127.194444 35.748667 417.008180 
 127.194667 35.748667 407.075994 
 127.194778 35.748667 402.408680 
 127.194889 35.748667 397.940634 
 127.195000 35.748667 393.681611 
 127.193889 35.748778 444.308098 
 127.194000 35.748778 438.345771 
 127.194111 35.748778 432.552138 
 127.194222 35.748778 426.925740 
 127.194444 35.748778 416.219703 
 127.194667 35.748778 406.275056 
 127.194778 35.748778 401.601795 
 127.194889 35.748778 397.127974 
 127.195000 35.748778 392.863347 
 127.194000 35.748778 438.345771 
 127.194111 35.748778 432.552138 
 127.194222 35.748778 426.925740 
 127.194333 35.748778 421.482349 
 127.194556 35.748778 411.151629 
 127.194778 35.748778 401.601795 
 127.194889 35.748778 397.127974 
 127.195000 35.748778 392.863347 
 127.195111 35.748778 388.803261 
 127.194000 35.748889 437.511702 
 127.194111 35.748889 431.711823 
 127.194222 35.748889 426.079390 
 127.194333 35.748889 420.630176 
 127.194556 35.748889 410.288401 
 127.194778 35.748889 400.728246 
 127.194889 35.748889 396.249515 
 127.195000 35.748889 391.980136 
 127.195111 35.748889 387.915439 
 127.194000 35.749000 436.606927 
 127.194111 35.749000 430.801721 
 127.194222 35.749000 425.164167 
 127.194333 35.749000 419.710040 
 127.194556 35.749000 409.359006 
 127.194778 35.749000 399.790290 
 127.194889 35.749000 395.307511 
 127.195000 35.749000 391.034229 
 127.195111 35.749000 386.965754 
 127.194111 35.749000 430.801721 
 127.194222 35.749000 425.164167 
 127.194333 35.749000 419.710040 
 127.194444 35.749000 414.437045 
 127.194667 35.749000 404.472819 
 127.194889 35.749000 395.307511 
 127.195000 35.749000 391.034229 
 127.195111 35.749000 386.965754 
 127.195222 35.749000 383.106828 
 127.194111 35.749111 429.819365 
 127.194222 35.749111 424.177580 
 127.194333 35.749111 418.719424 
 127.194444 35.749111 413.442585 
 127.194667 35.749111 403.471192 
 127.194889 35.749111 394.299327 
 127.195000 35.749111 390.022967 
 127.195111 35.749111 385.951528 
 127.195222 35.749111 382.089739 
 127.194111 35.749222 428.768832 
 127.194222 35.749222 423.123715 
 127.194333 35.749222 417.662420 
 127.194444 35.749222 412.382620 
 127.194667 35.749222 402.405797 
 127.194889 35.749222 393.229069 
 127.195000 35.749222 388.950456 
 127.195111 35.749222 384.876864 
 127.195222 35.749222 381.013009 
 127.194222 35.749333 421.999673 
 127.194333 35.749333 416.536111 
 127.194444 35.749333 411.254214 
 127.194556 35.749333 406.167784 
 127.194778 35.749333 396.583630 
 127.195000 35.749333 387.813669 
 127.195111 35.749333 383.738716 
 127.195222 35.749333 379.873574 
 127.195333 35.749333 376.221592 
 127.194222 35.749444 420.810083 
 127.194333 35.749444 415.345123 
 127.194444 35.749444 410.061993 
 127.194556 35.749444 404.974478 
 127.194778 35.749444 395.388540 
 127.195000 35.749444 386.617204 
 127.195111 35.749444 382.541679 
 127.195222 35.749444 378.676020 
 127.195333 35.749444 375.023562 
 127.194222 35.749556 419.551648 
 127.194333 35.749556 414.086147 
 127.194444 35.749556 408.802630 
 127.194556 35.749556 403.714869 
 127.194778 35.749556 394.128791 
 127.195000 35.749556 385.357671 
 127.195111 35.749556 381.282346 
 127.195222 35.749556 377.416927 
 127.195333 35.749556 373.764733 
 127.194333 35.749556 414.086147 
 127.194444 35.749556 408.802630 
 127.194556 35.749556 403.714869 
 127.194667 35.749556 398.819674 
 127.194889 35.749556 389.638228 
 127.195111 35.749556 381.282346 
 127.195222 35.749556 377.416927 
 127.195333 35.749556 373.764733 
 127.195444 35.749556 370.319886 
 127.194333 35.749667 412.764330 
 127.194444 35.749667 407.481267 
 127.194556 35.749667 402.394088 
 127.194667 35.749667 397.499586 
 127.194889 35.749667 388.319789 
 127.195111 35.749667 379.965788 
 127.195222 35.749667 376.101354 
 127.195333 35.749667 372.450151 
 127.195444 35.749667 369.006286 
 127.194333 35.749778 411.375977 
 127.194444 35.749778 406.094197 
 127.194556 35.749778 401.008420 
 127.194667 35.749778 396.115420 
 127.194889 35.749778 386.938849 
 127.195111 35.749778 378.588247 
 127.195222 35.749778 374.725533 
 127.195333 35.749778 371.076038 
 127.195444 35.749778 367.633857 
 127.194444 35.749778 406.094197 
 127.194556 35.749778 401.008420 
 127.194667 35.749778 396.115420 
 127.194778 35.749778 391.426905 
 127.195000 35.749778 382.660898 
 127.195222 35.749778 374.725533 
 127.195333 35.749778 371.076038 
 127.195444 35.749778 367.633857 
 127.195556 35.749778 364.403530 
 127.194444 35.749889 404.644519 
 127.194556 35.749889 399.560951 
 127.194667 35.749889 394.670249 
 127.194778 35.749889 389.984098 
 127.195000 35.749889 381.222944 
 127.195222 35.749889 373.292469 
 127.195333 35.749889 369.645387 
 127.195444 35.749889 366.205575 
 127.195556 35.749889 362.977555 
 127.194444 35.750000 403.135788 
 127.194556 35.750000 398.055219 
 127.194667 35.750000 393.167594 
 127.194778 35.750000 388.484571 
 127.195000 35.750000 379.729753 
 127.195222 35.750000 371.805591 
 127.195333 35.750000 368.161604 
 127.195444 35.750000 364.724829 
 127.195556 35.750000 361.499764 
 127.194556 35.750000 398.055219 
 127.194667 35.750000 393.167594 
 127.194778 35.750000 388.484571 
 127.194889 35.750000 384.002091 
 127.195111 35.750000 375.662721 
 127.195333 35.750000 368.161604 
 127.195444 35.750000 364.724829 
 127.195556 35.750000 361.499764 
 127.195667 35.750000 358.479809 
 127.194556 35.750111 396.486965 
 127.194667 35.750111 391.603193 
 127.194778 35.750111 386.924059 
 127.194889 35.750111 382.445491 
 127.195111 35.750111 374.113912 
 127.195333 35.750111 366.620415 
 127.195444 35.750111 363.187339 
 127.195556 35.750111 359.965874 
 127.195667 35.750111 356.949409 
 127.194556 35.750222 394.862527 
 127.194667 35.750222 389.983359 
 127.194778 35.750222 385.308851 
 127.194889 35.750222 380.834916 
 127.195111 35.750222 372.512522 
 127.195333 35.750222 365.027971 
 127.195444 35.750222 361.599233 
 127.195556 35.750222 358.381986 
 127.195667 35.750222 355.369610 
 127.194667 35.750222 389.983359 
 127.194778 35.750222 385.308851 
 127.194889 35.750222 380.834916 
 127.195000 35.750222 376.571094 
 127.195222 35.750222 368.663749 
 127.195444 35.750222 361.599233 
 127.195556 35.750222 358.381986 
 127.195667 35.750222 355.369610 
 127.195778 35.750222 352.564620 
 127.194667 35.750333 388.303483 
 127.194778 35.750333 383.634339 
 127.194889 35.750333 379.165761 
 127.195000 35.750333 374.907257 
 127.195222 35.750333 367.010367 
 127.195444 35.750333 359.955913 
 127.195556 35.750333 356.743503 
 127.195667 35.750333 353.735817 
 127.195778 35.750333 350.935347 
 127.194667 35.750444 386.570329 
 127.194778 35.750444 381.907256 
 127.194889 35.750444 377.444726 
 127.195000 35.750444 373.192216 
 127.195222 35.750444 365.307081 
 127.195444 35.750444 358.263920 
 127.195556 35.750444 355.056935 
 127.195667 35.750444 352.054509 
 127.195778 35.750444 349.259109 
 127.194778 35.750444 381.907256 
 127.194889 35.750444 377.444726 
 127.195000 35.750444 373.192216 
 127.195111 35.750444 369.144836 
 127.195333 35.750444 361.682102 
 127.195556 35.750444 355.056935 
 127.195667 35.750444 352.054509 
 127.195778 35.750444 349.259109 
 127.195889 35.750444 346.663502 
 127.194778 35.750556 380.122663 
 127.194889 35.750556 375.666880 
 127.195000 35.750556 371.421045 
 127.195111 35.750556 367.380254 
 127.195333 35.750556 359.930339 
 127.195556 35.750556 353.317381 
 127.195667 35.750556 350.320787 
 127.195778 35.750556 347.531012 
 127.195889 35.750556 344.940817 
 127.194778 35.750667 378.284515 
 127.194889 35.750667 373.836154 
 127.195000 35.750667 369.597652 
 127.195111 35.750667 365.564092 
 127.195333 35.750667 358.128223 
 127.195556 35.750667 351.528629 
 127.195667 35.750667 348.538418 
 127.195778 35.750667 345.754799 
 127.195889 35.750667 343.170527 
 127.194889 35.750667 373.836154 
 127.195000 35.750667 369.597652 
 127.195111 35.750667 365.564092 
 127.195222 35.750667 361.739918 
 127.195444 35.750667 354.723013 
 127.195667 35.750667 348.538418 
 127.195778 35.750667 345.754799 
 127.195889 35.750667 343.170527 
 127.196000 35.750667 340.786193 
 127.194889 35.750778 371.956870 
 127.195000 35.750778 367.726328 
 127.195111 35.750778 363.700613 
 127.195222 35.750778 359.884134 
 127.195444 35.750778 352.882089 
 127.195667 35.750778 346.711525 
 127.195778 35.750778 343.934565 
 127.195889 35.750778 341.356703 
 127.196000 35.750778 338.978507 
 127.194889 35.750889 370.023621 
 127.195000 35.750889 365.801682 
 127.195111 35.750889 361.784434 
 127.195222 35.750889 357.976258 
 127.195444 35.750889 350.990229 
 127.195667 35.750889 344.834776 
 127.195778 35.750889 342.064988 
 127.195889 35.750889 339.494029 
 127.196000 35.750889 337.122446 
 127.195000 35.750889 365.801682 
 127.195111 35.750889 361.784434 
 127.195222 35.750889 357.976258 
 127.195333 35.750889 354.380194 
 127.195556 35.750889 347.810645 
 127.195778 35.750889 342.064988 
 127.195889 35.750889 339.494029 
 127.196000 35.750889 337.122446 
 127.196111 35.750889 334.942473 
 127.195000 35.751000 363.831396 
 127.195111 35.751000 359.823195 
 127.195222 35.751000 356.023884 
 127.195333 35.751000 352.436473 
 127.195556 35.751000 345.883542 
 127.195778 35.751000 340.153456 
 127.195889 35.751000 337.589855 
 127.196000 35.751000 335.225320 
 127.196111 35.751000 333.052088 
 127.195000 35.751111 361.809779 
 127.195111 35.751111 357.811222 
 127.195222 35.751111 354.021353 
 127.195333 35.751111 350.443155 
 127.195556 35.751111 343.907902 
 127.195778 35.751111 338.194374 
 127.195889 35.751111 335.638596 
 127.196000 35.751111 333.281556 
 127.196111 35.751111 331.115492 
 127.195111 35.751111 357.811222 
 127.195222 35.751111 354.021353 
 127.195333 35.751111 350.443155 
 127.195444 35.751111 347.070599 
 127.195667 35.751111 340.948391 
 127.195889 35.751111 335.638596 
 127.196000 35.751111 333.281556 
 127.196111 35.751111 331.115492 
 127.196222 35.751111 329.139215 
 127.195111 35.751222 355.756524 
 127.195222 35.751222 351.976628 
 127.195333 35.751222 348.408153 
 127.195444 35.751222 345.045067 
 127.195667 35.751222 338.940927 
 127.195889 35.751222 333.647945 
 127.196000 35.751222 331.298805 
 127.196111 35.751222 329.140298 
 127.196222 35.751222 327.171216 
 127.195111 35.751333 353.653146 
 127.195222 35.751333 349.883771 
 127.195333 35.751333 346.325550 
 127.195444 35.751333 342.972444 
 127.195667 35.751333 336.887339 
 127.195889 35.751333 331.612060 
 127.196000 35.751333 329.271238 
 127.196111 35.751333 327.120688 
 127.196222 35.751333 325.159183 
 127.195222 35.751333 349.883771 
 127.195333 35.751333 346.325550 
 127.195444 35.751333 342.972444 
 127.195556 35.751333 339.828600 
 127.195778 35.751333 334.150910 
 127.196000 35.751333 329.271238 
 127.196111 35.751333 327.120688 
 127.196222 35.751333 325.159183 
 127.196333 35.751333 323.378547 
 127.195222 35.751444 347.751094 
 127.195333 35.751444 344.203605 
 127.195444 35.751444 340.860941 
 127.195556 35.751444 337.727212 
 127.195778 35.751444 332.068741 
 127.196000 35.751444 327.206833 
 127.196111 35.751444 325.064598 
 127.196222 35.751444 323.111010 
 127.196333 35.751444 321.337902 
 127.195222 35.751556 345.572394 
 127.195333 35.751556 342.036138 
 127.195444 35.751556 338.704397 
 127.195556 35.751556 335.581247 
 127.195778 35.751556 329.942863 
 127.196000 35.751556 325.099516 
 127.196111 35.751556 322.965966 
 127.196222 35.751556 321.020649 
 127.196333 35.751556 319.255408 
 127.195333 35.751556 342.036138 
 127.195444 35.751556 338.704397 
 127.195556 35.751556 335.581247 
 127.195667 35.751556 332.660007 
 127.195889 35.751556 327.422567 
 127.196111 35.751556 322.965966 
 127.196222 35.751556 321.020649 
 127.196333 35.751556 319.255408 
 127.196444 35.751556 317.667449 
 127.195333 35.751667 339.827907 
 127.195444 35.751667 336.507538 
 127.195556 35.751667 333.395396 
 127.195667 35.751667 330.484801 
 127.195889 35.751667 325.267467 
 127.196111 35.751667 320.829333 
 127.196222 35.751667 318.892613 
 127.196333 35.751667 317.135548 
 127.196444 35.751667 315.555330 
 127.195333 35.751778 337.583967 
 127.195444 35.751778 334.275383 
 127.195556 35.751778 331.174644 
 127.195667 35.751778 328.275070 
 127.195889 35.751778 323.078546 
 127.196111 35.751778 318.659518 
 127.196222 35.751778 316.731691 
 127.196333 35.751778 314.983082 
 127.196444 35.751778 313.410871 
 127.195444 35.751778 334.275383 
 127.195556 35.751778 331.174644 
 127.195667 35.751778 328.275070 
 127.195778 35.751778 325.578784 
 127.196000 35.751778 320.774700 
 127.196222 35.751778 316.731691 
 127.196333 35.751778 314.983082 
 127.196444 35.751778 313.410871 
 127.196556 35.751778 312.006601 
 127.195444 35.751889 332.001405 
 127.195556 35.751889 328.912487 
 127.195667 35.751889 326.024335 
 127.195778 35.751889 323.339040 
 127.196000 35.751889 318.555632 
 127.196222 35.751889 314.531495 
 127.196333 35.751889 312.791638 
 127.196444 35.751889 311.227714 
 127.196556 35.751889 309.831281 
 127.195444 35.752000 329.694590 
 127.195556 35.752000 326.617855 
 127.195667 35.752000 323.741470 
 127.195778 35.752000 321.067494 
 127.196000 35.752000 316.305371 
 127.196222 35.752000 312.300652 
 127.196333 35.752000 310.569800 
 127.196444 35.752000 309.014400 
 127.196556 35.752000 307.626028 
 127.195556 35.752000 326.617855 
 127.195667 35.752000 323.741470 
 127.195778 35.752000 321.067494 
 127.195889 35.752000 318.588696 
 127.196111 35.752000 314.209805 
 127.196333 35.752000 310.569800 
 127.196444 35.752000 309.014400 
 127.196556 35.752000 307.626028 
 127.196667 35.752000 306.400495 
 127.195556 35.752111 324.284021 
 127.195667 35.752111 321.419774 
 127.195778 35.752111 318.757469 
 127.195889 35.752111 316.289882 
 127.196111 35.752111 311.931965 
 127.196333 35.752111 308.310986 
 127.196444 35.752111 306.764364 
 127.196556 35.752111 305.384292 
 127.196667 35.752111 304.166575 
 127.195556 35.752222 321.920189 
 127.195667 35.752222 319.068393 
 127.195778 35.752222 316.418055 
 127.195889 35.752222 313.961961 
 127.196111 35.752222 309.625535 
 127.196333 35.752222 306.024040 
 127.196444 35.752222 304.486405 
 127.196556 35.752222 303.114831 
 127.196667 35.752222 301.905114 
 127.195667 35.752222 319.068393 
 127.195778 35.752222 316.418055 
 127.195889 35.752222 313.961961 
 127.196000 35.752222 311.700351 
 127.196222 35.752222 307.736125 
 127.196444 35.752222 304.486405 
 127.196556 35.752222 303.114831 
 127.196667 35.752222 301.905114 
 127.196778 35.752222 300.848651 
 127.195667 35.752333 316.680415 
 127.195778 35.752333 314.042369 
 127.195889 35.752333 311.598073 
 127.196000 35.752333 309.347741 
 127.196222 35.752333 305.404535 
 127.196444 35.752333 302.173765 
 127.196556 35.752333 300.810901 
 127.196667 35.752333 299.609385 
 127.196778 35.752333 298.560636 
 127.195667 35.752445 314.261058 
 127.195778 35.752445 311.635590 
 127.195889 35.752445 309.203364 
 127.196000 35.752445 306.964567 
 127.196222 35.752445 303.042846 
 127.196444 35.752445 299.831435 
 127.196556 35.752445 298.477467 
 127.196667 35.752445 297.284325 
 127.196778 35.752445 296.243452 
 127.195778 35.752445 311.635590 
 127.195889 35.752445 309.203364 
 127.196000 35.752445 306.964567 
 127.196111 35.752445 304.911537 
 127.196333 35.752445 301.350445 
 127.196556 35.752445 298.477467 
 127.196667 35.752445 297.284325 
 127.196778 35.752445 296.243452 
 127.196889 35.752445 295.349488 
 127.195778 35.752556 309.203125 
 127.195889 35.752556 306.783205 
 127.196000 35.752556 304.556164 
 127.196111 35.752556 302.514353 
 127.196333 35.752556 298.974054 
 127.196556 35.752556 296.119707 
 127.196667 35.752556 294.935086 
 127.196778 35.752556 293.902225 
 127.196889 35.752556 293.015768 
 127.195778 35.752667 306.737805 
 127.195889 35.752667 304.330453 
 127.196000 35.752667 302.115414 
 127.196111 35.752667 300.085055 
 127.196333 35.752667 296.565967 
 127.196556 35.752667 293.730614 
 127.196667 35.752667 292.554675 
 127.196778 35.752667 291.529979 
 127.196889 35.752667 290.651168 
 127.195889 35.752667 304.330453 
 127.196000 35.752667 302.115414 
 127.196111 35.752667 300.085055 
 127.196222 35.752667 298.237910 
 127.196444 35.752667 295.066303 
 127.196667 35.752667 292.554675 
 127.196778 35.752667 291.529979 
 127.196889 35.752667 290.651168 
 127.197000 35.752667 289.909625 
 127.195889 35.752778 301.854734 
 127.196000 35.752778 299.651890 
 127.196111 35.752778 297.633159 
 127.196222 35.752778 295.797060 
 127.196444 35.752778 292.645845 
 127.196667 35.752778 290.152378 
 127.196778 35.752778 289.135957 
 127.196889 35.752778 288.264897 
 127.197000 35.752778 287.530607 
 127.195889 35.752889 299.348735 
 127.196000 35.752889 297.158304 
 127.196111 35.752889 295.151408 
 127.196222 35.752889 293.326545 
 127.196444 35.752889 290.196059 
 127.196667 35.752889 287.721042 
 127.196778 35.752889 286.713024 
 127.196889 35.752889 285.849832 
 127.197000 35.752889 285.122906 
 127.196000 35.752889 297.158304 
 127.196111 35.752889 295.151408 
 127.196222 35.752889 293.326545 
 127.196333 35.752889 291.675743 
 127.196556 35.752889 288.879236 
 127.196778 35.752889 286.713024 
 127.196889 35.752889 285.849832 
 127.197000 35.752889 285.122906 
 127.197111 35.752889 284.525957 
 127.196000 35.753000 294.644429 
 127.196111 35.753000 292.649517 
 127.196222 35.753000 290.836027 
 127.196333 35.753000 289.196011 
 127.196556 35.753000 286.419304 
 127.196778 35.753000 284.270621 
 127.196889 35.753000 283.415376 
 127.197000 35.753000 282.695887 
 127.197111 35.753000 282.105874 
 127.196000 35.753111 292.102822 
 127.196111 35.753111 290.120072 
 127.196222 35.753111 288.318121 
 127.196333 35.753111 286.689041 
 127.196556 35.753111 283.932399 
 127.196778 35.753111 281.801465 
 127.196889 35.753111 280.954264 
 127.197000 35.753111 280.242299 
 127.197111 35.753111 279.659302 
 127.196111 35.753111 290.120072 
 127.196222 35.753111 288.318121 
 127.196333 35.753111 286.689041 
 127.196444 35.753111 285.229869 
 127.196667 35.753111 282.792396 
 127.196889 35.753111 280.954264 
 127.197000 35.753111 280.242299 
 127.197111 35.753111 279.659302 
 127.197222 35.753111 279.196767 
 127.196111 35.753222 287.568570 
 127.196222 35.753222 285.778289 
 127.196333 35.753222 284.160265 
 127.196444 35.753222 282.711526 
 127.196667 35.753222 280.293133 
 127.196889 35.753222 278.471791 
 127.197000 35.753222 277.767415 
 127.197111 35.753222 277.191491 
 127.197222 35.753222 276.735553 
 127.196111 35.753333 285.000661 
 127.196222 35.753333 283.222150 
 127.196333 35.753333 281.615271 
 127.196444 35.753333 280.177044 
 127.196667 35.753333 277.777860 
 127.196889 35.753333 275.973409 
 127.197000 35.753333 275.276663 
 127.197111 35.753333 274.707849 
 127.197222 35.753333 274.258538 
 127.196111 35.753445 282.408728 
 127.196222 35.753445 280.642114 
 127.196333 35.753445 279.046495 
 127.196444 35.753445 277.618883 
 127.196667 35.753445 275.239083 
 127.196889 35.753445 273.451659 
 127.197000 35.753445 272.762599 
 127.197111 35.753445 272.200945 
 127.197222 35.753445 271.758306 
 127.196222 35.753445 280.642114 
 127.196333 35.753445 279.046495 
 127.196444 35.753445 277.618883 
 127.196556 35.753445 276.351158 
 127.196778 35.753445 274.274357 
 127.197000 35.753445 272.762599 
 127.197111 35.753445 272.200945 
 127.197222 35.753445 271.758306 
 127.197333 35.753445 271.427720 
 127.196222 35.753556 278.048258 
 127.196333 35.753556 276.463963 
 127.196444 35.753556 275.047021 
 127.196556 35.753556 273.789343 
 127.196778 35.753556 271.730799 
 127.197000 35.753556 270.235000 
 127.197111 35.753556 269.680522 
 127.197222 35.753556 269.244568 
 127.197333 35.753556 268.920195 
 127.196222 35.753667 275.432873 
 127.196333 35.753667 273.859994 
 127.196444 35.753667 272.453803 
 127.196556 35.753667 271.206242 
 127.196778 35.753667 269.166067 
 127.197000 35.753667 267.686310 
 127.197111 35.753667 267.139040 
 127.197222 35.753667 266.709798 
 127.197333 35.753667 266.391660 
 127.196333 35.753667 273.859994 
 127.196444 35.753667 272.453803 
 127.196556 35.753667 271.206242 
 127.196667 35.753667 270.113073 
 127.196889 35.753667 268.359918 
 127.197111 35.753667 267.139040 
 127.197222 35.753667 266.709798 
 127.197333 35.753667 266.391660 
 127.197444 35.753667 266.176406 
 127.196333 35.753778 271.244747 
 127.196444 35.753778 269.849339 
 127.196556 35.753778 268.611920 
 127.196667 35.753778 267.528253 
 127.196889 35.753778 265.792298 
 127.197111 35.753778 264.586372 
 127.197222 35.753778 264.163836 
 127.197333 35.753778 263.851927 
 127.197444 35.753778 263.642466 
 127.196333 35.753889 268.610435 
 127.196444 35.753889 267.225871 
 127.196556 35.753889 265.998642 
 127.196667 35.753889 264.924518 
 127.196889 35.753889 263.205821 
 127.197111 35.753889 262.014881 
 127.197222 35.753889 261.599061 
 127.197333 35.753889 261.293386 
 127.197444 35.753889 261.089721 
 127.196444 35.753889 267.225871 
 127.196556 35.753889 265.998642 
 127.196667 35.753889 264.924518 
 127.196778 35.753889 263.995340 
 127.197000 35.753889 262.547726 
 127.197222 35.753889 261.599061 
 127.197333 35.753889 261.293386 
 127.197444 35.753889 261.089721 
 127.197556 35.753889 260.980659 
 127.196444 35.754000 264.593620 
 127.196556 35.754000 263.376587 
 127.196667 35.754000 262.312004 
 127.196778 35.754000 261.391749 
 127.197000 35.754000 259.960199 
 127.197222 35.754000 259.025429 
 127.197333 35.754000 258.725964 
 127.197444 35.754000 258.528071 
 127.197556 35.754000 258.424370 
 127.196444 35.754111 261.944739 
 127.196556 35.754111 260.737932 
 127.196667 35.754111 259.682910 
 127.196778 35.754111 258.771592 
 127.197000 35.754111 257.356117 
 127.197222 35.754111 256.435231 
 127.197333 35.754111 256.141967 
 127.197444 35.754111 255.949834 
 127.197556 35.754111 255.851480 
 127.196556 35.754111 260.737932 
 127.196667 35.754111 259.682910 
 127.196778 35.754111 258.771592 
 127.196889 35.754111 257.998713 
 127.197111 35.754111 256.837670 
 127.197333 35.754111 256.141967 
 127.197444 35.754111 255.949834 
 127.197556 35.754111 255.851480 
 127.197667 35.754111 255.839039 
 127.196556 35.754222 258.088386 
 127.196667 35.754222 257.042923 
 127.196778 35.754222 256.140531 
 127.196889 35.754222 255.375960 
 127.197111 35.754222 254.229822 
 127.197333 35.754222 253.546952 
 127.197444 35.754222 253.360550 
 127.197556 35.754222 253.267513 
 127.197667 35.754222 253.260025 
 127.196556 35.754333 255.433736 
 127.196667 35.754333 254.397801 
 127.196778 35.754333 253.504302 
 127.196889 35.754333 252.748001 
 127.197111 35.754333 251.616684 
 127.197333 35.754333 250.946556 
 127.197444 35.754333 250.765839 
 127.197556 35.754333 250.678075 
 127.197667 35.754333 250.675494 
 127.196667 35.754333 254.397801 
 127.196778 35.754333 253.504302 
 127.196889 35.754333 252.748001 
 127.197000 35.754333 252.120827 
 127.197222 35.754333 251.227522 
 127.197444 35.754333 250.765839 
 127.197556 35.754333 250.678075 
 127.197667 35.754333 250.675494 
 127.197778 35.754333 250.750464 
 127.196667 35.754444 251.739641 
 127.196778 35.754444 250.855024 
 127.196889 35.754444 250.106975 
 127.197000 35.754444 249.487469 
 127.197222 35.754444 248.607854 
 127.197444 35.754444 248.157918 
 127.197556 35.754444 248.075392 
 127.197667 35.754444 248.077686 
 127.197778 35.754444 248.157200 
 127.196667 35.754555 249.078777 
 127.196778 35.754555 248.202990 
 127.196889 35.754555 247.463140 
 127.197000 35.754555 246.851247 
 127.197222 35.754555 245.985205 
 127.197444 35.754555 245.546897 
 127.197556 35.754555 245.469551 
 127.197667 35.754555 245.476663 
 127.197778 35.754555 245.560668 
 127.196778 35.754555 248.202990 
 127.196889 35.754555 247.463140 
 127.197000 35.754555 246.851247 
 127.197111 35.754555 246.361254 
 127.197333 35.754555 245.716371 
 127.197556 35.754555 245.469551 
 127.197667 35.754555 245.476663 
 127.197778 35.754555 245.560668 
 127.197889 35.754555 245.714151 
 127.196778 35.754667 245.540266 
 127.196889 35.754667 244.808583 
 127.197000 35.754667 244.204264 
 127.197111 35.754667 243.721278 
 127.197333 35.754667 243.088869 
 127.197556 35.754667 242.852730 
 127.197667 35.754667 242.864614 
 127.197778 35.754667 242.953065 
 127.197889 35.754667 243.110717 
 127.196778 35.754778 242.877194 
 127.196889 35.754778 242.153610 
 127.197000 35.754778 241.556796 
 127.197111 35.754778 241.080745 
 127.197333 35.754778 240.460668 
 127.197556 35.754778 240.235068 
 127.197667 35.754778 240.251657 
 127.197778 35.754778 240.344487 
 127.197889 35.754778 240.506247 
 127.196889 35.754778 242.153610 
 127.197000 35.754778 241.556796 
 127.197111 35.754778 241.080745 
 127.197222 35.754778 240.717593 
 127.197444 35.754778 240.302215 
 127.197667 35.754778 240.251657 
 127.197778 35.754778 240.344487 
 127.197889 35.754778 240.506247 
 127.198000 35.754778 240.729277 
 127.196889 35.754889 239.490268 
 127.197000 35.754889 238.900909 
 127.197111 35.754889 238.431739 
 127.197222 35.754889 238.074944 
 127.197444 35.754889 237.670845 
 127.197667 35.754889 237.629941 
 127.197778 35.754889 237.727096 
 127.197889 35.754889 237.892910 
 127.198000 35.754889 238.119762 
 127.196889 35.755000 236.824309 
 127.197000 35.755000 236.242336 
 127.197111 35.755000 235.779975 
 127.197222 35.755000 235.429465 
 127.197444 35.755000 235.036500 
 127.197667 35.755000 235.005108 
 127.197778 35.755000 235.106520 
 127.197889 35.755000 235.276322 
 127.198000 35.755000 235.506934 
 127.197000 35.755000 236.242336 
 127.197111 35.755000 235.779975 
 127.197222 35.755000 235.429465 
 127.197333 35.755000 235.184191 
 127.197556 35.755000 234.979295 
 127.197778 35.755000 235.106520 
 127.197889 35.755000 235.276322 
 127.198000 35.755000 235.506934 
 127.198111 35.755000 235.791468 
 127.197000 35.755111 233.586827 
 127.197111 35.755111 233.131189 
 127.197222 35.755111 232.786873 
 127.197333 35.755111 232.547300 
 127.197556 35.755111 232.352513 
 127.197778 35.755111 232.488410 
 127.197889 35.755111 232.662124 
 127.198000 35.755111 232.896422 
 127.198111 35.755111 233.184469 
 127.197000 35.755222 230.926419 
 127.197111 35.755222 230.477430 
 127.197222 35.755222 230.139238 
 127.197333 35.755222 229.905293 
 127.197556 35.755222 229.720467 
 127.197778 35.755222 229.864894 
 127.197889 35.755222 230.042452 
 127.198000 35.755222 230.280372 
 127.198111 35.755222 230.571870 
 127.197111 35.755222 230.477430 
 127.197222 35.755222 230.139238 
 127.197333 35.755222 229.905293 
 127.197444 35.755222 229.768045 
 127.197667 35.755222 229.755197 
 127.197889 35.755222 230.042452 
 127.198000 35.755222 230.280372 
 127.198111 35.755222 230.571870 
 127.198222 35.755222 230.909440 
 127.197111 35.755333 227.828985 
 127.197222 35.755333 227.496817 
 127.197333 35.755333 227.268403 
 127.197444 35.755333 227.136243 
 127.197667 35.755333 227.132411 
 127.197889 35.755333 227.427443 
 127.198000 35.755333 227.668904 
 127.198111 35.755333 227.963777 
 127.198222 35.755333 228.304596 
 127.197111 35.755444 225.177901 
 127.197222 35.755444 224.851676 
 127.197333 35.755444 224.628708 
 127.197444 35.755444 224.501555 
 127.197667 35.755444 224.506575 
 127.197889 35.755444 224.809231 
 127.198000 35.755444 225.054159 
 127.198111 35.755444 225.352337 
 127.198222 35.755444 225.696340 
 127.197222 35.755444 224.851676 
 127.197333 35.755444 224.628708 
 127.197444 35.755444 224.501555 
 127.197556 35.755444 224.463262 
 127.197778 35.755444 224.624230 
 127.198000 35.755444 225.054159 
 127.198111 35.755444 225.352337 
 127.198222 35.755444 225.696340 
 127.198333 35.755444 226.079865 
 127.197222 35.755555 222.214056 
 127.197333 35.755555 221.996431 
 127.197444 35.755555 221.874179 
 127.197556 35.755555 221.840387 
 127.197778 35.755555 222.009352 
 127.198000 35.755555 222.446251 
 127.198111 35.755555 222.747649 
 127.198222 35.755555 223.094755 
 127.198333 35.755555 223.481317 
 127.197222 35.755667 219.576033 
 127.197333 35.755667 219.363658 
 127.197444 35.755667 219.246218 
 127.197556 35.755667 219.216835 
 127.197778 35.755667 219.393623 
 127.198000 35.755667 219.837329 
 127.198111 35.755667 220.141870 
 127.198222 35.755667 220.492006 
 127.198333 35.755667 220.881536 
 127.197333 35.755667 219.363658 
 127.197444 35.755667 219.246218 
 127.197556 35.755667 219.216835 
 127.197667 35.755667 219.268364 
 127.197889 35.755667 219.585722 
 127.198111 35.755667 220.141870 
 127.198222 35.755667 220.492006 
 127.198333 35.755667 220.881536 
 127.198444 35.755667 221.303251 
 127.197333 35.755778 216.736069 
 127.197444 35.755778 216.623337 
 127.197556 35.755778 216.598264 
 127.197667 35.755778 216.653758 
 127.197889 35.755778 216.978193 
 127.198111 35.755778 217.540608 
 127.198222 35.755778 217.893692 
 127.198333 35.755778 218.286113 
 127.198444 35.755778 218.710701 
 127.197333 35.755889 214.119303 
 127.197444 35.755889 214.011165 
 127.197556 35.755889 213.990290 
 127.197667 35.755889 214.049641 
 127.197889 35.755889 214.380947 
 127.198111 35.755889 214.949435 
 127.198222 35.755889 215.305378 
 127.198333 35.755889 215.700603 
 127.198444 35.755889 216.127984 
 127.197444 35.755889 214.011165 
 127.197556 35.755889 213.990290 
 127.197667 35.755889 214.049641 
 127.197778 35.755889 214.182120 
 127.198000 35.755889 214.638874 
 127.198222 35.755889 215.305378 
 127.198333 35.755889 215.700603 
 127.198444 35.755889 216.127984 
 127.198556 35.755889 216.581835 
 127.197444 35.756000 211.401840 
 127.197556 35.756000 211.385063 
 127.197667 35.756000 211.448173 
 127.197778 35.756000 211.584114 
 127.198000 35.756000 212.047109 
 127.198222 35.756000 212.719265 
 127.198333 35.756000 213.117215 
 127.198444 35.756000 213.547312 
 127.198556 35.756000 214.003922 
 127.197444 35.756111 208.805451 
 127.197556 35.756111 208.792656 
 127.197667 35.756111 208.859411 
 127.197778 35.756111 208.998704 
 127.198000 35.756111 209.467731 
 127.198222 35.756111 210.145343 
 127.198333 35.756111 210.545926 
 127.198444 35.756111 210.978653 
 127.198556 35.756111 211.437937 
 127.197556 35.756111 208.792656 
 127.197667 35.756111 208.859411 
 127.197778 35.756111 208.998704 
 127.197889 35.756111 209.203864 
 127.198111 35.756111 209.783946 
 127.198333 35.756111 210.545926 
 127.198444 35.756111 210.978653 
 127.198556 35.756111 211.437937 
 127.198667 35.756111 211.916978 
 127.197556 35.756222 206.205260 
 127.197667 35.756222 206.275557 
 127.197778 35.756222 206.418101 
 127.197889 35.756222 206.626275 
 127.198111 35.756222 207.211865 
 127.198333 35.756222 207.978984 
 127.198444 35.756222 208.414259 
 127.198556 35.756222 208.876139 
 127.198667 35.756222 209.357863 
 127.197556 35.756333 203.632873 
 127.197667 35.756333 203.706593 
 127.197778 35.756333 203.852273 
 127.197889 35.756333 204.063351 
 127.198111 35.756333 204.654238 
 127.198333 35.756333 205.426299 
 127.198444 35.756333 205.864028 
 127.198556 35.756333 206.328414 
 127.198667 35.756333 206.812736 
 127.197667 35.756333 203.706593 
 127.197778 35.756333 203.852273 
 127.197889 35.756333 204.063351 
 127.198000 35.756333 204.332756 
 127.198222 35.756333 205.020716 
 127.198444 35.756333 205.864028 
 127.198556 35.756333 206.328414 
 127.198667 35.756333 206.812736 
 127.198778 35.756333 207.311943 
 127.197667 35.756444 201.144775 
 127.197778 35.756444 201.293487 
 127.197889 35.756444 201.507365 
 127.198000 35.756444 201.779386 
 127.198222 35.756444 202.472225 
 127.198444 35.756444 203.320266 
 127.198556 35.756444 203.787074 
 127.198667 35.756444 204.273912 
 127.198778 35.756444 204.775776 
 127.197667 35.756555 198.599996 
 127.197778 35.756555 198.751620 
 127.197889 35.756555 198.968185 
 127.198000 35.756555 199.242710 
 127.198222 35.756555 199.940218 
 127.198444 35.756555 200.792787 
 127.198556 35.756555 201.261923 
 127.198667 35.756555 201.751186 
 127.198778 35.756555 202.255616 
 127.197778 35.756555 198.751620 
 127.197889 35.756555 198.968185 
 127.198000 35.756555 199.242710 
 127.198111 35.756555 199.569051 
 127.198333 35.756555 200.350422 
 127.198556 35.756555 201.261923 
 127.198667 35.756555 201.751186 
 127.198778 35.756555 202.255616 
 127.198889 35.756555 202.768904 
 127.197778 35.756667 196.219005 
 127.197889 35.756667 196.438148 
 127.198000 35.756667 196.715074 
 127.198111 35.756667 197.043690 
 127.198333 35.756667 197.829419 
 127.198556 35.756667 198.745336 
 127.198667 35.756667 199.236937 
 127.198778 35.756667 199.743849 
 127.198889 35.756667 200.259800 
 127.197778 35.756778 193.701100 
 127.197889 35.756778 193.922710 
 127.198000 35.756778 194.201926 
 127.198111 35.756778 194.532709 
 127.198333 35.756778 195.322591 
 127.198556 35.756778 196.242728 
 127.198667 35.756778 196.736573 
 127.198778 35.756778 197.245877 
 127.198889 35.756778 197.764401 
 127.197889 35.756778 193.922710 
 127.198000 35.756778 194.201926 
 127.198111 35.756778 194.532709 
 127.198222 35.756778 194.908160 
 127.198444 35.756778 195.769212 
 127.198667 35.756778 196.736573 
 127.198778 35.756778 197.245877 
 127.198889 35.756778 197.764401 
 127.199000 35.756778 198.287724 
 127.197889 35.756889 191.427211 
 127.198000 35.756889 191.708603 
 127.198111 35.756889 192.041442 
 127.198222 35.756889 192.418874 
 127.198444 35.756889 193.283857 
 127.198667 35.756889 194.255403 
 127.198778 35.756889 194.767000 
 127.198889 35.756889 195.287999 
 127.199000 35.756889 195.814021 
 127.197889 35.757000 188.944113 
 127.198000 35.757000 189.227572 
 127.198111 35.757000 189.562360 
 127.198222 35.757000 189.941669 
 127.198444 35.757000 190.810383 
 127.198667 35.757000 191.785922 
 127.198778 35.757000 192.299719 
 127.198889 35.757000 192.823104 
 127.199000 35.757000 193.351735 
 127.198000 35.757000 189.227572 
 127.198111 35.757000 189.562360 
 127.198222 35.757000 189.941669 
 127.198333 35.757000 190.359911 
 127.198556 35.757000 191.287882 
 127.198778 35.757000 192.299719 
 127.198889 35.757000 192.823104 
 127.199000 35.757000 193.351735 
 127.199111 35.757000 193.879847 
 127.198000 35.757111 186.768396 
 127.198111 35.757111 187.105019 
 127.198222 35.757111 187.486094 
 127.198333 35.757111 187.906081 
 127.198556 35.757111 188.837658 
 127.198778 35.757111 189.853538 
 127.198889 35.757111 190.379205 
 127.199000 35.757111 190.910342 
 127.199111 35.757111 191.441214 
 127.198000 35.757222 184.323637 
 127.198111 35.757222 184.661987 
 127.198222 35.757222 185.044720 
 127.198333 35.757222 185.466348 
 127.198556 35.757222 186.401326 
 127.198778 35.757222 187.421051 
 127.198889 35.757222 187.948903 
 127.199000 35.757222 188.482450 
 127.199111 35.757222 189.015985 
 127.198111 35.757333 182.242670 
 127.198222 35.757333 182.626949 
 127.198333 35.757333 183.050106 
 127.198444 35.757333 183.505566 
 127.198667 35.757333 184.491837 
 127.198889 35.757333 185.541549 
 127.199000 35.757333 186.077398 
 127.199111 35.757333 186.613486 
 127.199222 35.757333 187.146036 
 127.198111 35.757444 179.839746 
 127.198222 35.757444 180.225460 
 127.198333 35.757444 180.650039 
 127.198444 35.757444 181.106948 
 127.198667 35.757444 182.096374 
 127.198889 35.757444 183.149848 
 127.199000 35.757444 183.687894 
 127.199111 35.757444 184.226432 
 127.199222 35.757444 184.761715 
 127.198111 35.757556 177.458387 
 127.198222 35.757556 177.845425 
 127.198333 35.757556 178.271312 
 127.198444 35.757556 178.729560 
 127.198667 35.757556 179.721923 
 127.198889 35.757556 180.778938 
 127.199000 35.757556 181.319071 
 127.199111 35.757556 181.859947 
 127.199222 35.757556 182.397851 
 127.198222 35.757556 177.845425 
 127.198333 35.757556 178.271312 
 127.198444 35.757556 178.729560 
 127.198556 35.757556 179.215195 
 127.198778 35.757556 180.245171 
 127.199000 35.757556 181.319071 
 127.199111 35.757556 181.859947 
 127.199222 35.757556 182.397851 
 127.199333 35.757556 182.927609 
 127.198222 35.757667 175.491850 
 127.198333 35.757667 175.918933 
 127.198444 35.757667 176.378406 
 127.198556 35.757667 176.865340 
 127.198778 35.757667 177.898290 
 127.199000 35.757667 178.975909 
 127.199111 35.757667 179.519004 
 127.199222 35.757667 180.059406 
 127.199333 35.757667 180.591963 
 127.198222 35.757778 173.157599 
 127.198333 35.757778 173.585766 
 127.198444 35.757778 174.046353 
 127.198556 35.757778 174.534475 
 127.198778 35.757778 175.570178 
 127.199000 35.757778 176.651291 
 127.199111 35.757778 177.196489 
 127.199222 35.757778 177.739273 
 127.199333 35.757778 178.274510 
 127.198333 35.757778 173.585766 
 127.198444 35.757778 174.046353 
 127.198556 35.757778 174.534475 
 127.198667 35.757778 175.043915 
 127.198889 35.757778 176.107330 
 127.199111 35.757778 177.196489 
 127.199222 35.757778 177.739273 
 127.199333 35.757778 178.274510 
 127.199444 35.757778 178.798985 
 127.198333 35.757889 171.280774 
 127.198444 35.757889 171.742359 
 127.198556 35.757889 172.231554 
 127.198667 35.757889 172.742177 
 127.198889 35.757889 173.808444 
 127.199111 35.757889 174.901316 
 127.199222 35.757889 175.446353 
 127.199333 35.757889 175.984137 
 127.199444 35.757889 176.511478 
 127.198333 35.758000 168.996956 
 127.198444 35.758000 169.459427 
 127.198556 35.758000 169.949580 
 127.198667 35.758000 170.461273 
 127.198889 35.758000 171.530159 
 127.199111 35.758000 172.626503 
 127.199222 35.758000 173.173668 
 127.199333 35.758000 173.713870 
 127.199444 35.758000 174.243945 
 127.198444 35.758000 169.459427 
 127.198556 35.758000 169.949580 
 127.198667 35.758000 170.461273 
 127.198778 35.758000 170.990089 
 127.199000 35.758000 172.077469 
 127.199222 35.758000 173.173668 
 127.199333 35.758000 173.713870 
 127.199444 35.758000 174.243945 
 127.199556 35.758000 174.759284 
 127.198444 35.758111 167.206316 
 127.198556 35.758111 167.697310 
 127.198667 35.758111 168.209953 
 127.198778 35.758111 168.739866 
 127.199000 35.758111 169.830009 
 127.199222 35.758111 170.929926 
 127.199333 35.758111 171.472407 
 127.199444 35.758111 172.005070 
 127.199556 35.758111 172.523319 
 127.198444 35.758222 164.976173 
 127.198556 35.758222 165.467891 
 127.198667 35.758222 165.981366 
 127.198778 35.758222 166.512257 
 127.199000 35.758222 167.604916 
 127.199222 35.758222 168.708290 
 127.199333 35.758222 169.252913 
 127.199444 35.758222 169.788021 
 127.199556 35.758222 170.309033 
 127.198556 35.758222 165.467891 
 127.198667 35.758222 165.981366 
 127.198778 35.758222 166.512257 
 127.198889 35.758222 167.054756 
 127.199111 35.758222 168.157274 
 127.199333 35.758222 169.252913 
 127.199444 35.758222 169.788021 
 127.199556 35.758222 170.309033 
 127.199667 35.758222 170.813250 
 127.198556 35.758333 163.269867 
 127.198667 35.758333 163.784052 
 127.198778 35.758333 164.315794 
 127.198889 35.758333 164.859319 
 127.199111 35.758333 165.964528 
 127.199333 35.758333 167.063878 
 127.199444 35.758333 167.601277 
 127.199556 35.758333 168.124891 
 127.199667 35.758333 168.632036 
 127.198556 35.758444 161.096538 
 127.198667 35.758444 161.611313 
 127.198778 35.758444 162.143783 
 127.198889 35.758444 162.688206 
 127.199111 35.758444 163.795840 
 127.199333 35.758444 164.898616 
 127.199444 35.758444 165.438156 
 127.199556 35.758444 165.964213 
 127.199667 35.758444 166.474122 
 127.198667 35.758444 161.611313 
 127.198778 35.758444 162.143783 
 127.198889 35.758444 162.688206 
 127.199000 35.758444 163.240697 
 127.199222 35.758444 164.350152 
 127.199444 35.758444 165.438156 
 127.199556 35.758444 165.964213 
 127.199667 35.758444 166.474122 
 127.199778 35.758444 166.963830 
 127.198667 35.758556 159.467805 
 127.198778 35.758556 160.000877 
 127.198889 35.758556 160.546067 
 127.199000 35.758556 161.099521 
 127.199222 35.758556 162.211593 
 127.199444 35.758556 163.303274 
 127.199556 35.758556 163.831608 
 127.199667 35.758556 164.344106 
 127.199778 35.758556 164.836720 
 127.198667 35.758667 157.357967 
 127.198778 35.758667 157.891511 
 127.198889 35.758667 158.437334 
 127.199000 35.758667 158.991613 
 127.199222 35.758667 160.106004 
 127.199444 35.758667 161.201036 
 127.199556 35.758667 161.731472 
 127.199667 35.758667 162.246375 
 127.199778 35.758667 162.741701 
 127.198778 35.758667 157.891511 
 127.198889 35.758667 158.437334 
 127.199000 35.758667 158.991613 
 127.199111 35.758667 159.548982 
 127.199333 35.758667 160.657701 
 127.199556 35.758667 161.731472 
 127.199667 35.758667 162.246375 
 127.199778 35.758667 162.741701 
 127.199889 35.758667 163.215217 
 127.198778 35.758778 155.809236 
 127.198889 35.758778 156.355559 
 127.199000 35.758778 156.910523 
 127.199111 35.758778 157.468787 
 127.199333 35.758778 158.580015 
 127.199556 35.758778 159.657364 
 127.199667 35.758778 160.174491 
 127.199778 35.758778 160.672340 
 127.199889 35.758778 161.148686 
 127.198778 35.758889 153.761999 
 127.198889 35.758889 154.308685 
 127.199000 35.758889 154.864190 
 127.199111 35.758889 155.423199 
 127.199333 35.758889 156.536611 
 127.199556 35.758889 157.617181 
 127.199667 35.758889 158.136338 
 127.199778 35.758889 158.636505 
 127.199889 35.758889 159.115467 
 127.198889 35.758889 154.308685 
 127.199000 35.758889 154.864190 
 127.199111 35.758889 155.423199 
 127.199222 35.758889 155.982321 
 127.199444 35.758889 157.083070 
 127.199667 35.758889 158.136338 
 127.199778 35.758889 158.636505 
 127.199889 35.758889 159.115467 
 127.200000 35.758889 159.569705 
 127.198889 35.759000 152.290438 
 127.199000 35.759000 152.846341 
 127.199111 35.759000 153.405944 
 127.199222 35.759000 153.965879 
 127.199444 35.759000 155.068976 
 127.199667 35.759000 156.125646 
 127.199778 35.759000 156.627930 
 127.199889 35.759000 157.109295 
 127.200000 35.759000 157.566221 
 127.198889 35.759111 150.308507 
 127.199000 35.759111 150.864659 
 127.199111 35.759111 151.424700 
 127.199222 35.759111 151.985284 
 127.199444 35.759111 153.090375 
 127.199667 35.759111 154.150051 
 127.199778 35.759111 154.654238 
 127.199889 35.759111 155.137781 
 127.200000 35.759111 155.597156 
 127.199000 35.759111 150.864659 
 127.199111 35.759111 151.424700 
 127.199222 35.759111 151.985284 
 127.199333 35.759111 152.541498 
 127.199556 35.759111 153.627421 
 127.199778 35.759111 154.654238 
 127.199889 35.759111 155.137781 
 127.200000 35.759111 155.597156 
 127.200111 35.759111 156.030546 
 127.199000 35.759222 148.913054 
 127.199111 35.759222 149.473377 
 127.199222 35.759222 150.034445 
 127.199333 35.759222 150.591361 
 127.199556 35.759222 151.679399 
 127.199778 35.759222 152.709338 
 127.199889 35.759222 153.194833 
 127.200000 35.759222 153.656422 
 127.200111 35.759222 154.092288 
 127.199000 35.759333 146.995678 
 127.199111 35.759333 147.556122 
 127.199222 35.759333 148.117504 
 127.199333 35.759333 148.674944 
 127.199556 35.759333 149.764708 
 127.199778 35.759333 150.797337 
 127.199889 35.759333 151.284550 
 127.200000 35.759333 151.748107 
 127.200111 35.759333 152.186189 
 127.199111 35.759333 147.556122 
 127.199222 35.759333 148.117504 
 127.199333 35.759333 148.674944 
 127.199444 35.759333 149.225504 
 127.199667 35.759333 150.289993 
 127.199889 35.759333 151.284550 
 127.200000 35.759333 151.748107 
 127.200111 35.759333 152.186189 
 127.200222 35.759333 152.595795 
 127.199111 35.759444 145.676829 
 127.199222 35.759444 146.238353 
 127.199333 35.759444 146.796133 
 127.199444 35.759444 147.347246 
 127.199667 35.759444 148.413515 
 127.199889 35.759444 149.410788 
 127.200000 35.759444 149.876055 
 127.200111 35.759444 150.316085 
 127.200222 35.759444 150.727866 
 127.199111 35.759556 143.829695 
 127.199222 35.759556 144.391185 
 127.199333 35.759556 144.949122 
 127.199444 35.759556 145.500592 
 127.199667 35.759556 146.568216 
 127.199889 35.759556 147.567730 
 127.200000 35.759556 148.034454 
 127.200111 35.759556 148.476161 
 127.200222 35.759556 148.889836 
 127.199222 35.759556 144.391185 
 127.199333 35.759556 144.949122 
 127.199444 35.759556 145.500592 
 127.199556 35.759556 146.041140 
 127.199778 35.759556 147.077807 
 127.200000 35.759556 148.034454 
 127.200111 35.759556 148.476161 
 127.200222 35.759556 148.889836 
 127.200333 35.759556 149.274023 
 127.199222 35.759667 142.582991 
 127.199333 35.759667 143.140894 
 127.199444 35.759667 143.692522 
 127.199556 35.759667 144.233425 
 127.199778 35.759667 145.271423 
 127.200000 35.759667 146.230239 
 127.200111 35.759667 146.673343 
 127.200222 35.759667 147.088615 
 127.200333 35.759667 147.474595 
 127.199222 35.759778 140.808167 
 127.199333 35.759778 141.365844 
 127.199444 35.759778 141.917424 
 127.199556 35.759778 142.458467 
 127.199778 35.759778 143.497325 
 127.200000 35.759778 144.457789 
 127.200111 35.759778 144.902007 
 127.200222 35.759778 145.318578 
 127.200333 35.759778 145.706040 
 127.199333 35.759778 141.365844 
 127.199444 35.759778 141.917424 
 127.199556 35.759778 142.458467 
 127.199667 35.759778 142.986437 
 127.199889 35.759778 143.988955 
 127.200111 35.759778 144.902007 
 127.200222 35.759778 145.318578 
 127.200333 35.759778 145.706040 
 127.200444 35.759778 146.061891 
 127.199333 35.759889 139.630666 
 127.199444 35.759889 140.181990 
 127.199556 35.759889 140.722952 
 127.199667 35.759889 141.251020 
 127.199889 35.759889 142.254281 
 127.200111 35.759889 143.168799 
 127.200222 35.759889 143.586362 
 127.200333 35.759889 143.974981 
 127.200444 35.759889 144.332145 
 127.199333 35.760000 137.929959 
 127.199444 35.760000 138.480815 
 127.199556 35.760000 139.021471 
 127.199667 35.760000 139.549399 
 127.199889 35.760000 140.552885 
 127.200111 35.760000 141.468291 
 127.200222 35.760000 141.886536 
 127.200333 35.760000 142.275987 
 127.200444 35.760000 142.634121 
 127.199444 35.760000 138.480815 
 127.199556 35.760000 139.021471 
 127.199667 35.760000 139.549399 
 127.199778 35.760000 140.060596 
 127.200000 35.760000 141.022725 
 127.200222 35.760000 141.886536 
 127.200333 35.760000 142.275987 
 127.200444 35.760000 142.634121 
 127.200556 35.760000 142.959812 
 127.199444 35.760111 136.817467 
 127.199556 35.760111 137.357586 
 127.199667 35.760111 137.885130 
 127.199778 35.760111 138.396098 
 127.200000 35.760111 139.358227 
 127.200222 35.760111 140.222623 
 127.200333 35.760111 140.612570 
 127.200444 35.760111 140.971324 
 127.200556 35.760111 141.297750 
 127.199444 35.760222 135.195228 
 127.199556 35.760222 135.734580 
 127.199667 35.760222 136.261494 
 127.199778 35.760222 136.771970 
 127.200000 35.760222 137.733528 
 127.200222 35.760222 138.597876 
 127.200333 35.760222 138.987978 
 127.200444 35.760222 139.346995 
 127.200556 35.760222 139.673781 
 127.199556 35.760222 135.734580 
 127.199667 35.760222 136.261494 
 127.199778 35.760222 136.771970 
 127.199889 35.760222 137.263830 
 127.200111 35.760222 138.179229 
 127.200333 35.760222 138.987978 
 127.200444 35.760222 139.346995 
 127.200556 35.760222 139.673781 
 127.200667 35.760222 139.966552 
 127.199556 35.760333 134.147362 
 127.199667 35.760333 134.673392 
 127.199778 35.760333 135.183109 
 127.199889 35.760333 135.674332 
 127.200111 35.760333 136.588814 
 127.200333 35.760333 137.397078 
 127.200444 35.760333 137.755995 
 127.200556 35.760333 138.082761 
 127.200667 35.760333 138.375583 
 127.199556 35.760444 132.601860 
 127.199667 35.760444 133.126751 
 127.199778 35.760444 133.635439 
 127.199889 35.760444 134.125740 
 127.200111 35.760444 135.038682 
 127.200333 35.760444 135.845773 
 127.200444 35.760444 136.204220 
 127.200556 35.760444 136.530581 
 127.200667 35.760444 136.823052 
 127.199667 35.760556 131.616693 
 127.199778 35.760556 132.124074 
 127.199889 35.760556 132.613157 
 127.200000 35.760556 133.080392 
 127.200222 35.760556 133.940678 
 127.200444 35.760556 134.686738 
 127.200556 35.760556 135.012300 
 127.200667 35.760556 135.304008 
 127.200778 35.760556 135.560376 
 127.199667 35.760667 130.148829 
 127.199778 35.760667 130.654624 
 127.199889 35.760667 131.142196 
 127.200000 35.760667 131.607990 
 127.200222 35.760667 132.465583 
 127.200444 35.760667 133.209148 
 127.200556 35.760667 133.533513 
 127.200667 35.760667 133.824044 
 127.200778 35.760667 134.079245 
 127.199667 35.760778 128.718505 
 127.199778 35.760778 129.222426 
 127.199889 35.760778 129.708181 
 127.200000 35.760778 130.172213 
 127.200222 35.760778 131.026417 
 127.200444 35.760778 131.766725 
 127.200556 35.760778 132.089485 
 127.200667 35.760778 132.378415 
 127.200778 35.760778 132.632009 
 127.199778 35.760778 129.222426 
 127.199889 35.760778 129.708181 
 127.200000 35.760778 130.172213 
 127.200111 35.760778 130.612653 
 127.200333 35.760778 131.411968 
 127.200556 35.760778 132.089485 
 127.200667 35.760778 132.378415 
 127.200778 35.760778 132.632009 
 127.200889 35.760778 132.849569 
 127.199778 35.760889 127.832771 
 127.199889 35.760889 128.316405 
 127.200000 35.760889 128.778355 
 127.200111 35.760889 129.216742 
 127.200333 35.760889 130.012014 
 127.200556 35.760889 130.685512 
 127.200667 35.760889 130.972417 
 127.200778 35.760889 131.223962 
 127.200889 35.760889 131.439437 
 127.199778 35.761000 126.481220 
 127.199889 35.761000 126.962419 
 127.200000 35.761000 127.421954 
 127.200111 35.761000 127.857938 
 127.200333 35.761000 128.648415 
 127.200556 35.761000 129.317071 
 127.200667 35.761000 129.601512 
 127.200778 35.761000 129.850555 
 127.200889 35.761000 130.063474 
 127.199889 35.761000 126.962419 
 127.200000 35.761000 127.421954 
 127.200111 35.761000 127.857938 
 127.200222 35.761000 128.267279 
 127.200444 35.761000 128.998756 
 127.200667 35.761000 129.601512 
 127.200778 35.761000 129.850555 
 127.200889 35.761000 130.063474 
 127.201000 35.761000 130.239047 
 127.199889 35.761111 125.648970 
 127.200000 35.761111 126.105758 
 127.200111 35.761111 126.538987 
 127.200222 35.761111 126.945563 
 127.200444 35.761111 127.671438 
 127.200667 35.761111 128.268436 
 127.200778 35.761111 128.514520 
 127.200889 35.761111 128.724410 
 127.201000 35.761111 128.896879 
 127.199889 35.761222 124.378505 
 127.200000 35.761222 124.832212 
 127.200111 35.761222 125.262335 
 127.200222 35.761222 125.665778 
 127.200444 35.761222 126.385261 
 127.200667 35.761222 126.975640 
 127.200778 35.761222 127.218308 
 127.200889 35.761222 127.424697 
 127.201000 35.761222 127.593576 
 127.200000 35.761222 124.832212 
 127.200111 35.761222 125.262335 
 127.200222 35.761222 125.665778 
 127.200333 35.761222 126.040953 
 127.200556 35.761222 126.697445 
 127.200778 35.761222 127.218308 
 127.200889 35.761222 127.424697 
 127.201000 35.761222 127.593576 
 127.201111 35.761222 127.724533 
 127.200000 35.761333 123.597196 
 127.200111 35.761333 124.023848 
 127.200222 35.761333 124.423774 
 127.200333 35.761333 124.795373 
 127.200556 35.761333 125.444512 
 127.200778 35.761333 125.957690 
 127.200889 35.761333 126.160088 
 127.201000 35.761333 126.324871 
 127.201111 35.761333 126.451614 
 127.200000 35.761444 122.405196 
 127.200111 35.761444 122.828017 
 127.200222 35.761444 123.224050 
 127.200333 35.761444 123.591678 
 127.200556 35.761444 124.232621 
 127.200778 35.761444 124.737203 
 127.200889 35.761444 124.935130 
 127.201000 35.761444 125.095321 
 127.201111 35.761444 125.217338 
 127.200111 35.761444 122.828017 
 127.200222 35.761444 123.224050 
 127.200333 35.761444 123.591678 
 127.200444 35.761444 123.928298 
 127.200667 35.761444 124.502772 
 127.200889 35.761444 124.935130 
 127.201000 35.761444 125.095321 
 127.201111 35.761444 125.217338 
 127.201222 35.761444 125.300535 
 127.200111 35.761556 121.670938 
 127.200222 35.761556 122.062683 
 127.200333 35.761556 122.425928 
 127.200444 35.761556 122.758066 
 127.200667 35.761556 123.323234 
 127.200889 35.761556 123.745786 
 127.201000 35.761556 123.900870 
 127.201111 35.761556 124.017630 
 127.201222 35.761556 124.095423 
 127.200111 35.761667 120.556774 
 127.200222 35.761667 120.943848 
 127.200333 35.761667 121.302306 
 127.200444 35.761667 121.629544 
 127.200667 35.761667 122.184513 
 127.200889 35.761667 122.596300 
 127.201000 35.761667 122.745774 
 127.201111 35.761667 122.856759 
 127.201222 35.761667 122.928618 
 127.200222 35.761667 120.943848 
 127.200333 35.761667 121.302306 
 127.200444 35.761667 121.629544 
 127.200556 35.761667 121.924242 
 127.200778 35.761667 122.408804 
 127.201000 35.761667 122.745774 
 127.201111 35.761667 122.856759 
 127.201222 35.761667 122.928618 
 127.201333 35.761667 122.961239 
 127.200222 35.761778 119.863851 
 127.200333 35.761778 120.217102 
 127.200444 35.761778 120.538998 
 127.200556 35.761778 120.828205 
 127.200778 35.761778 121.301325 
 127.201000 35.761778 121.626190 
 127.201111 35.761778 121.730858 
 127.201222 35.761778 121.796227 
 127.201333 35.761778 121.822174 
 127.200222 35.761889 118.824790 
 127.200333 35.761889 119.172414 
 127.200444 35.761889 119.488533 
 127.200556 35.761889 119.771794 
 127.200778 35.761889 120.232511 
 127.201000 35.761889 120.544245 
 127.201111 35.761889 120.642062 
 127.201222 35.761889 120.700393 
 127.201333 35.761889 120.719104 
 127.200333 35.761889 119.172414 
 127.200444 35.761889 119.488533 
 127.200556 35.761889 119.771794 
 127.200667 35.761889 120.020306 
 127.200889 35.761889 120.407564 
 127.201111 35.761889 120.642062 
 127.201222 35.761889 120.700393 
 127.201333 35.761889 120.719104 
 127.201444 35.761889 120.698185 
 127.200333 35.762000 118.170041 
 127.200444 35.762000 118.479953 
 127.200556 35.762000 118.756822 
 127.200667 35.762000 118.998755 
 127.200889 35.762000 119.372275 
 127.201111 35.762000 119.592229 
 127.201222 35.762000 119.642984 
 127.201333 35.762000 119.653907 
 127.201444 35.762000 119.625006 
 127.200333 35.762111 117.206616 
 127.200444 35.762111 117.509867 
 127.200556 35.762111 117.779872 
 127.200667 35.762111 118.014736 
 127.200889 35.762111 118.373489 
 127.201111 35.762111 118.577808 
 127.201222 35.762111 118.620419 
 127.201333 35.762111 118.622975 
 127.201444 35.762111 118.585499 
 127.200444 35.762111 117.509867 
 127.200556 35.762111 117.779872 
 127.200667 35.762111 118.014736 
 127.200778 35.762111 118.212901 
 127.201000 35.762111 118.495299 
 127.201222 35.762111 118.620419 
 127.201333 35.762111 118.622975 
 127.201444 35.762111 118.585499 
 127.201556 35.762111 118.508210 
 127.200444 35.762222 116.581666 
 127.200556 35.762222 116.844355 
 127.200667 35.762222 117.071682 
 127.200778 35.762222 117.262089 
 127.201000 35.762222 117.528274 
 127.201222 35.762222 117.636251 
 127.201333 35.762222 117.629886 
 127.201444 35.762222 117.583272 
 127.201556 35.762222 117.496620 
 127.200444 35.762333 115.692189 
 127.200556 35.762333 115.947082 
 127.200667 35.762333 116.166374 
 127.200778 35.762333 116.348510 
 127.201000 35.762333 116.597407 
 127.201222 35.762333 116.687108 
 127.201333 35.762333 116.671237 
 127.201444 35.762333 116.614888 
 127.201556 35.762333 116.518266 
 127.200556 35.762333 115.947082 
 127.200667 35.762333 116.166374 
 127.200778 35.762333 116.348510 
 127.200889 35.762333 116.492581 
 127.201111 35.762333 116.662439 
 127.201333 35.762333 116.671237 
 127.201444 35.762333 116.614888 
 127.201556 35.762333 116.518266 
 127.201667 35.762333 116.382073 
 127.200556 35.762444 115.091145 
 127.200667 35.762444 115.301930 
 127.200778 35.762444 115.475306 
 127.200889 35.762444 115.610351 
 127.201111 35.762444 115.761378 
 127.201333 35.762444 115.750316 
 127.201444 35.762444 115.683669 
 127.201556 35.762444 115.576504 
 127.201667 35.762444 115.429551 
 127.200556 35.762556 114.273581 
 127.200667 35.762556 114.475355 
 127.200778 35.762556 114.639453 
 127.200889 35.762556 114.764935 
 127.201111 35.762556 114.896017 
 127.201333 35.762556 114.863928 
 127.201444 35.762556 114.786382 
 127.201556 35.762556 114.668063 
 127.201667 35.762556 114.509733 
 127.200667 35.762556 114.475355 
 127.200778 35.762556 114.639453 
 127.200889 35.762556 114.764935 
 127.201000 35.762556 114.850649 
 127.201222 35.762556 114.900509 
 127.201444 35.762556 114.786382 
 127.201556 35.762556 114.668063 
 127.201667 35.762556 114.509733 
 127.201778 35.762556 114.311985 
 127.200667 35.762667 113.688134 
 127.200778 35.762667 113.842447 
 127.200889 35.762667 113.957843 
 127.201000 35.762667 114.033189 
 127.201222 35.762667 114.061447 
 127.201444 35.762667 113.924613 
 127.201556 35.762667 113.794549 
 127.201667 35.762667 113.624243 
 127.201778 35.762667 113.414286 
 127.200667 35.762778 112.941455 
 127.200778 35.762778 113.085492 
 127.200889 35.762778 113.190299 
 127.201000 35.762778 113.254759 
 127.201222 35.762778 113.260341 
 127.201444 35.762778 113.099687 
 127.201556 35.762778 112.957308 
 127.201667 35.762778 112.774449 
 127.201778 35.762778 112.551701 
 127.200778 35.762778 113.085492 
 127.200889 35.762778 113.190299 
 127.201000 35.762778 113.254759 
 127.201111 35.762778 113.278268 
 127.201333 35.762778 113.200759 
 127.201556 35.762778 112.957308 
 127.201667 35.762778 112.774449 
 127.201778 35.762778 112.551701 
 127.201889 35.762778 112.290560 
 127.200778 35.762889 112.365900 
 127.200889 35.762889 112.459575 
 127.201000 35.762889 112.512592 
 127.201111 35.762889 112.524337 
 127.201333 35.762889 112.422395 
 127.201556 35.762889 112.153371 
 127.201667 35.762889 111.957341 
 127.201778 35.762889 111.721178 
 127.201889 35.762889 111.446421 
 127.200778 35.763000 111.686037 
 127.200889 35.763000 111.768075 
 127.201000 35.763000 111.809133 
 127.201111 35.763000 111.808583 
 127.201333 35.763000 111.681120 
 127.201556 35.763000 111.385400 
 127.201667 35.763000 111.175628 
 127.201778 35.763000 110.925472 
 127.201889 35.763000 110.636520 
 127.200889 35.763000 111.768075 
 127.201000 35.763000 111.809133 
 127.201111 35.763000 111.808583 
 127.201222 35.763000 111.765992 
 127.201444 35.763000 111.554200 
 127.201667 35.763000 111.175628 
 127.201778 35.763000 110.925472 
 127.201889 35.763000 110.636520 
 127.202000 35.763000 110.309791 
 127.200889 35.763111 111.113292 
 127.201000 35.763111 111.141833 
 127.201111 35.763111 111.128418 
 127.201222 35.763111 111.072641 
 127.201444 35.763111 110.833531 
 127.201667 35.763111 110.426496 
 127.201778 35.763111 110.161727 
 127.201889 35.763111 109.857955 
 127.202000 35.763111 109.516205 
 127.200889 35.763222 110.497328 
 127.201000 35.763222 110.512838 
 127.201111 35.763222 110.486030 
 127.201222 35.763222 110.416533 
 127.201444 35.763222 110.149006 
 127.201667 35.763222 109.712385 
 127.201778 35.763222 109.432433 
 127.201889 35.763222 109.113269 
 127.202000 35.763222 108.755926 
 127.200889 35.763333 109.917896 
 127.201000 35.763333 109.919814 
 127.201111 35.763333 109.879043 
 127.201222 35.763333 109.795243 
 127.201444 35.763333 109.498106 
 127.201667 35.763333 109.030679 
 127.201778 35.763333 108.734926 
 127.201889 35.763333 108.399751 
 127.202000 35.763333 108.026193 
 127.201000 35.763333 109.919814 
 127.201111 35.763333 109.879043 
 127.201222 35.763333 109.795243 
 127.201333 35.763333 109.668150 
 127.201556 35.763333 109.285270 
 127.201778 35.763333 108.734926 
 127.201889 35.763333 108.399751 
 127.202000 35.763333 108.026193 
 127.202111 35.763333 107.616685 
 127.201000 35.763444 109.364613 
 127.201111 35.763444 109.309356 
 127.201222 35.763444 109.210722 
 127.201333 35.763444 109.068439 
 127.201556 35.763444 108.654232 
 127.201778 35.763444 108.071436 
 127.201889 35.763444 107.719690 
 127.202000 35.763444 107.329355 
 127.202111 35.763444 106.902928 
 127.201000 35.763556 108.845117 
 127.201111 35.763556 108.774804 
 127.201222 35.763556 108.660757 
 127.201333 35.763556 108.502694 
 127.201556 35.763556 108.055960 
 127.201778 35.763556 107.439493 
 127.201889 35.763556 107.070561 
 127.202000 35.763556 106.662836 
 127.202111 35.763556 106.218878 
 127.201111 35.763556 108.774804 
 127.201222 35.763556 108.660757 
 127.201333 35.763556 108.502694 
 127.201444 35.763556 108.301045 
 127.201667 35.763556 107.768577 
 127.201889 35.763556 107.070561 
 127.202000 35.763556 106.662836 
 127.202111 35.763556 106.218878 
 127.202222 35.763556 105.740207 
 127.201111 35.763667 108.276175 
 127.201222 35.763667 108.146161 
 127.201333 35.763667 107.971759 
 127.201444 35.763667 107.753442 
 127.201667 35.763667 107.186700 
 127.201889 35.763667 106.453368 
 127.202000 35.763667 106.027672 
 127.202111 35.763667 105.565605 
 127.202222 35.763667 105.068701 
 127.201111 35.763778 107.813991 
 127.201222 35.763778 107.667491 
 127.201333 35.763778 107.476221 
 127.201444 35.763778 107.240703 
 127.201667 35.763778 106.638608 
 127.201889 35.763778 105.868876 
 127.202000 35.763778 105.424667 
 127.202111 35.763778 104.943953 
 127.202222 35.763778 104.428281 
 127.201222 35.763778 107.667491 
 127.201333 35.763778 107.476221 
 127.201444 35.763778 107.240703 
 127.201556 35.763778 106.961083 
 127.201778 35.763778 106.273880 
 127.202000 35.763778 105.424667 
 127.202111 35.763778 104.943953 
 127.202222 35.763778 104.428281 
 127.202333 35.763778 103.881052 
 127.201222 35.763889 107.222842 
 127.201333 35.763889 107.014122 
 127.201444 35.763889 106.760814 
 127.201556 35.763889 106.463064 
 127.201778 35.763889 105.738755 
 127.202000 35.763889 104.851525 
 127.202111 35.763889 104.351567 
 127.202222 35.763889 103.816534 
 127.202333 35.763889 103.249906 
 127.201222 35.764000 106.813468 
 127.201333 35.764000 106.586779 
 127.201444 35.764000 106.315161 
 127.201556 35.764000 105.998754 
 127.201778 35.764000 105.236283 
 127.202000 35.764000 104.309979 
 127.202111 35.764000 103.790254 
 127.202222 35.764000 103.235342 
 127.202333 35.764000 102.648804 
 127.201333 35.764000 106.586779 
 127.201444 35.764000 106.315161 
 127.201556 35.764000 105.998754 
 127.201667 35.764000 105.638925 
 127.201889 35.764000 104.792937 
 127.202111 35.764000 103.790254 
 127.202222 35.764000 103.235342 
 127.202333 35.764000 102.648804 
 127.202444 35.764000 102.032709 
 127.201333 35.764111 106.192437 
 127.201444 35.764111 105.901926 
 127.201556 35.764111 105.566278 
 127.201667 35.764111 105.186921 
 127.201889 35.764111 104.301100 
 127.202111 35.764111 103.257842 
 127.202222 35.764111 102.682471 
 127.202333 35.764111 102.075450 
 127.202444 35.764111 101.438870 
 127.201333 35.764222 105.832148 
 127.201444 35.764222 105.522235 
 127.201556 35.764222 105.166832 
 127.201667 35.764222 104.767432 
 127.201889 35.764222 103.840752 
 127.202111 35.764222 102.755904 
 127.202222 35.764222 102.159575 
 127.202333 35.764222 101.531578 
 127.202444 35.764222 100.874027 
 127.201444 35.764222 105.522235 
 127.201556 35.764222 105.166832 
 127.201667 35.764222 104.767432 
 127.201778 35.764222 104.324655 
 127.202000 35.764222 103.316834 
 127.202222 35.764222 102.159575 
 127.202333 35.764222 101.531578 
 127.202444 35.764222 100.874027 
 127.202556 35.764222 100.191347 
 127.201444 35.764333 105.174467 
 127.201556 35.764333 104.798735 
 127.201667 35.764333 104.378717 
 127.201778 35.764333 103.915038 
 127.202000 35.764333 102.864798 
 127.202222 35.764333 101.664594 
 127.202333 35.764333 101.015065 
 127.202444 35.764333 100.335996 
 127.202556 35.764333 99.631906 
 127.201444 35.764445 104.858977 
 127.201556 35.764445 104.462380 
 127.201667 35.764445 104.021208 
 127.201778 35.764445 103.536092 
 127.202000 35.764445 102.442372 
 127.202222 35.764445 101.198181 
 127.202333 35.764445 100.526610 
 127.202444 35.764445 99.825522 
 127.202556 35.764445 99.099530 
 127.201556 35.764445 104.462380 
 127.201667 35.764445 104.021208 
 127.201778 35.764445 103.536092 
 127.201889 35.764445 103.009435 
 127.202111 35.764445 101.838071 
 127.202333 35.764445 100.526610 
 127.202444 35.764445 99.825522 
 127.202556 35.764445 99.099530 
 127.202667 35.764445 98.351306 
 127.201556 35.764556 104.157930 
 127.201667 35.764556 103.695114 
 127.201778 35.764556 103.188072 
 127.201889 35.764556 102.639286 
 127.202111 35.764556 101.423180 
 127.202333 35.764556 100.066707 
 127.202444 35.764556 99.343148 
 127.202556 35.764556 98.594813 
 127.202667 35.764556 97.824405 
 127.201556 35.764667 103.883987 
 127.201667 35.764667 103.398970 
 127.201778 35.764667 102.869447 
 127.201889 35.764667 102.297980 
 127.202111 35.764667 101.036038 
 127.202333 35.764667 99.633489 
 127.202444 35.764667 98.886939 
 127.202556 35.764667 98.115755 
 127.202667 35.764667 97.322669 
 127.201667 35.764667 103.398970 
 127.201778 35.764667 102.869447 
 127.201889 35.764667 102.297980 
 127.202000 35.764667 101.685730 
 127.202222 35.764667 100.350593 
 127.202444 35.764667 98.886939 
 127.202556 35.764667 98.115755 
 127.202667 35.764667 97.322669 
 127.202778 35.764667 96.513152 
 127.201667 35.764778 103.133442 
 127.201778 35.764778 102.580967 
 127.201889 35.764778 101.986352 
 127.202000 35.764778 101.350773 
 127.202222 35.764778 99.968722 
 127.202444 35.764778 98.458181 
 127.202556 35.764778 97.663730 
 127.202667 35.764778 96.847561 
 127.202778 35.764778 96.015250 
 127.201667 35.764889 102.897250 
 127.201778 35.764889 102.321283 
 127.201889 35.764889 101.702984 
 127.202000 35.764889 101.043543 
 127.202222 35.764889 99.613536 
 127.202444 35.764889 98.055104 
 127.202556 35.764889 97.236902 
 127.202667 35.764889 96.397178 
 127.202778 35.764889 95.541615 
 127.201778 35.764889 102.321283 
 127.201889 35.764889 101.702984 
 127.202000 35.764889 101.043543 
 127.202111 35.764889 100.346485 
 127.202333 35.764889 98.848987 
 127.202556 35.764889 97.236902 
 127.202667 35.764889 96.397178 
 127.202778 35.764889 95.541615 
 127.202889 35.764889 94.673526 
 127.201778 35.765000 102.090917 
 127.201889 35.765000 101.448489 
 127.202000 35.765000 100.764749 
 127.202111 35.765000 100.043313 
 127.202333 35.765000 98.496992 
 127.202556 35.765000 96.836446 
 127.202667 35.765000 95.972788 
 127.202778 35.765000 95.093609 
 127.202889 35.765000 94.202259 
 127.201778 35.765111 101.888698 
 127.201889 35.765111 101.221623 
 127.202000 35.765111 100.513071 
 127.202111 35.765111 99.766753 
 127.202333 35.765111 98.170627 
 127.202556 35.765111 96.460684 
 127.202667 35.765111 95.572643 
 127.202778 35.765111 94.669416 
 127.202889 35.765111 93.754388 
 127.201889 35.765111 101.221623 
 127.202000 35.765111 100.513071 
 127.202111 35.765111 99.766753 
 127.202222 35.765111 98.984441 
 127.202444 35.765111 97.327632 
 127.202667 35.765111 95.572643 
 127.202778 35.765111 94.669416 
 127.202889 35.765111 93.754388 
 127.203000 35.765111 92.834063 
 127.201889 35.765222 101.022786 
 127.202000 35.765222 100.289005 
 127.202111 35.765222 99.517398 
 127.202222 35.765222 98.709757 
 127.202444 35.765222 97.002515 
 127.202667 35.765222 95.197825 
 127.202778 35.765222 94.270213 
 127.202889 35.765222 93.331185 
 127.203000 35.765222 92.387360 
 127.201889 35.765333 100.850901 
 127.202000 35.765333 100.091400 
 127.202111 35.765333 99.294021 
 127.202222 35.765333 98.460578 
 127.202444 35.765333 96.701990 
 127.202667 35.765333 94.846740 
 127.202778 35.765333 93.894336 
 127.202889 35.765333 92.930918 
 127.203000 35.765333 91.963220 
 127.202000 35.765445 99.920278 
 127.202111 35.765445 99.096699 
 127.202222 35.765445 98.237036 
 127.202333 35.765445 97.346102 
 127.202556 35.765445 95.483194 
 127.202778 35.765445 93.542196 
 127.202889 35.765445 92.554052 
 127.203000 35.765445 91.562163 
 127.203111 35.765445 90.570542 
 127.202000 35.765556 99.775466 
 127.202111 35.765556 98.925318 
 127.202222 35.765556 98.039077 
 127.202333 35.765556 97.121664 
 127.202556 35.765556 95.206298 
 127.202778 35.765556 93.214034 
 127.202889 35.765556 92.200887 
 127.203000 35.765556 91.184546 
 127.203111 35.765556 90.169066 
 127.202000 35.765667 99.656060 
 127.202111 35.765667 98.778896 
 127.202222 35.765667 97.865638 
 127.202333 35.765667 96.921322 
 127.202556 35.765667 94.952689 
 127.202778 35.765667 92.908410 
 127.202889 35.765667 91.869911 
 127.203000 35.765667 90.828788 
 127.203111 35.765667 89.789137 
 127.202111 35.765667 98.778896 
 127.202222 35.765667 97.865638 
 127.202333 35.765667 96.921322 
 127.202444 35.765667 95.948408 
 127.202667 35.765667 93.937195 
 127.202889 35.765667 91.869911 
 127.203000 35.765667 90.828788 
 127.203111 35.765667 89.789137 
 127.203222 35.765667 88.758553 
 127.202111 35.765778 98.657536 
 127.202222 35.765778 97.716931 
 127.202333 35.765778 96.745392 
 127.202444 35.765778 95.745409 
 127.202667 35.765778 93.680909 
 127.202889 35.765778 91.561961 
 127.203000 35.765778 90.495825 
 127.203111 35.765778 89.431789 
 127.203222 35.765778 88.377569 
 127.202111 35.765889 98.560413 
 127.202222 35.765889 97.592049 
 127.202333 35.765889 96.592888 
 127.202444 35.765889 95.565451 
 127.202667 35.765889 93.446940 
 127.202889 35.765889 91.275671 
 127.203000 35.765889 90.184220 
 127.203111 35.765889 89.095517 
 127.203222 35.765889 88.017398 
 127.202222 35.765889 97.592049 
 127.202333 35.765889 96.592888 
 127.202444 35.765889 95.565451 
 127.202556 35.765889 94.515769 
 127.202778 35.765889 92.365689 
 127.203000 35.765889 90.184220 
 127.203111 35.765889 89.095517 
 127.203222 35.765889 88.017398 
 127.203333 35.765889 86.954529 
 127.202222 35.766000 97.491020 
 127.202333 35.766000 96.463948 
 127.202444 35.766000 95.408782 
 127.202556 35.766000 94.331671 
 127.202778 35.766000 92.127865 
 127.203000 35.766000 89.894748 
 127.203111 35.766000 88.781195 
 127.203222 35.766000 87.679010 
 127.203333 35.766000 86.592906 
 127.202222 35.766111 97.413091 
 127.202333 35.766111 96.357737 
 127.202444 35.766111 95.274484 
 127.202556 35.766111 94.169603 
 127.202778 35.766111 91.911439 
 127.203000 35.766111 89.626111 
 127.203111 35.766111 88.487455 
 127.203222 35.766111 87.360972 
 127.203333 35.766111 86.251419 
 127.202333 35.766111 96.357737 
 127.202444 35.766111 95.274484 
 127.202556 35.766111 94.169603 
 127.202667 35.766111 93.046264 
 127.202889 35.766111 90.768861 
 127.203111 35.766111 88.487455 
 127.203222 35.766111 87.360972 
 127.203333 35.766111 86.251419 
 127.203444 35.766111 85.167249 
 127.202333 35.766222 96.274097 
 127.202444 35.766222 95.162462 
 127.202556 35.766222 94.029532 
 127.202667 35.766222 92.878512 
 127.202889 35.766222 90.547266 
 127.203111 35.766222 88.214565 
 127.203222 35.766222 87.063608 
 127.203333 35.766222 85.930448 
 127.203444 35.766222 84.823658 
 127.202333 35.766333 96.212711 
 127.202444 35.766333 95.072465 
 127.202556 35.766333 93.911271 
 127.202667 35.766333 92.732370 
 127.202889 35.766333 90.346930 
 127.203111 35.766333 87.962647 
 127.203222 35.766333 86.787098 
 127.203333 35.766333 85.630230 
 127.203444 35.766333 84.500735 
 127.202444 35.766333 95.072465 
 127.202556 35.766333 93.911271 
 127.202667 35.766333 92.732370 
 127.202778 35.766333 91.542985 
 127.203000 35.766333 89.152033 
 127.203222 35.766333 86.787098 
 127.203333 35.766333 85.630230 
 127.203444 35.766333 84.500735 
 127.203556 35.766333 83.403897 
 127.202444 35.766445 95.003791 
 127.202556 35.766445 93.814035 
 127.202667 35.766445 92.606974 
 127.202778 35.766445 91.389955 
 127.203000 35.766445 88.945561 
 127.203222 35.766445 86.530207 
 127.203333 35.766445 85.349463 
 127.203444 35.766445 84.197115 
 127.203556 35.766445 83.078493 
 127.202444 35.766556 94.956279 
 127.202556 35.766556 93.737779 
 127.202667 35.766556 92.502389 
 127.202778 35.766556 91.257585 
 127.203000 35.766556 88.759495 
 127.203222 35.766556 86.293534 
 127.203333 35.766556 85.088844 
 127.203444 35.766556 83.913589 
 127.203556 35.766556 82.773143 
 127.202556 35.766556 93.737779 
 127.202667 35.766556 92.502389 
 127.202778 35.766556 91.257585 
 127.202889 35.766556 90.007259 
 127.203111 35.766556 87.518729 
 127.203333 35.766556 85.088844 
 127.203444 35.766556 83.913589 
 127.203556 35.766556 82.773143 
 127.203667 35.766556 81.676644 
 127.202556 35.766667 93.681856 
 127.202667 35.766667 92.417889 
 127.202778 35.766667 91.145067 
 127.202889 35.766667 89.867326 
 127.203111 35.766667 87.326191 
 127.203333 35.766667 84.847202 
 127.203444 35.766667 83.648923 
 127.203556 35.766667 82.486555 
 127.203667 35.766667 81.369349 
 127.202556 35.766778 93.646072 
 127.202667 35.766778 92.353392 
 127.202778 35.766778 91.052434 
 127.202889 35.766778 89.747174 
 127.203111 35.766778 87.153278 
 127.203333 35.766778 84.625092 
 127.203444 35.766778 83.403765 
 127.203556 35.766778 82.219468 
 127.203667 35.766778 81.081561 
 127.202667 35.766778 92.353392 
 127.202778 35.766778 91.052434 
 127.202889 35.766778 89.747174 
 127.203000 35.766778 88.445948 
 127.203222 35.766778 85.877986 
 127.203444 35.766778 83.403765 
 127.203556 35.766778 82.219468 
 127.203667 35.766778 81.081561 
 127.203778 35.766778 79.995882 
 127.202667 35.766889 92.308302 
 127.202778 35.766889 90.979009 
 127.202889 35.766889 89.646049 
 127.203000 35.766889 88.317886 
 127.203222 35.766889 85.698592 
 127.203444 35.766889 83.177010 
 127.203556 35.766889 81.970714 
 127.203667 35.766889 80.812058 
 127.203778 35.766889 79.706918 
 127.202667 35.767000 92.282370 
 127.202778 35.767000 90.924607 
 127.202889 35.767000 89.563828 
 127.203000 35.767000 88.208628 
 127.203222 35.767000 85.537853 
 127.203444 35.767000 82.968829 
 127.203556 35.767000 81.740520 
 127.203667 35.767000 80.561113 
 127.203778 35.767000 79.436528 
 127.202778 35.767000 90.924607 
 127.202889 35.767000 89.563828 
 127.203000 35.767000 88.208628 
 127.203111 35.767000 86.863613 
 127.203333 35.767000 84.236456 
 127.203556 35.767000 81.740520 
 127.203667 35.767000 80.561113 
 127.203778 35.767000 79.436528 
 127.203889 35.767000 78.376360 
 127.202778 35.767111 90.888910 
 127.202889 35.767111 89.500260 
 127.203000 35.767111 88.117985 
 127.203111 35.767111 86.746733 
 127.203333 35.767111 84.070036 
 127.203556 35.767111 81.528980 
 127.203667 35.767111 80.328873 
 127.203778 35.767111 79.184906 
 127.203889 35.767111 78.106773 
 127.202778 35.767222 90.871433 
 127.202889 35.767222 89.454777 
 127.203000 35.767222 88.045312 
 127.203111 35.767222 86.647728 
 127.203333 35.767222 83.921353 
 127.203556 35.767222 81.335111 
 127.203667 35.767222 80.114298 
 127.203778 35.767222 78.950958 
 127.203889 35.767222 77.854886 
 127.202889 35.767222 89.454777 
 127.203000 35.767222 88.045312 
 127.203111 35.767222 86.647728 
 127.203222 35.767222 85.271344 
 127.203444 35.767222 82.607398 
 127.203667 35.767222 80.114298 
 127.203778 35.767222 78.950958 
 127.203889 35.767222 77.854886 
 127.204000 35.767222 76.832370 
 127.202889 35.767333 89.427187 
 127.203000 35.767333 87.990528 
 127.203111 35.767333 86.566621 
 127.203222 35.767333 85.164911 
 127.203444 35.767333 82.453546 
 127.203667 35.767333 79.917883 
 127.203778 35.767333 78.735261 
 127.203889 35.767333 77.621351 
 127.204000 35.767333 76.582477 
 127.202889 35.767444 89.417047 
 127.203000 35.767444 87.953109 
 127.203111 35.767444 86.502815 
 127.203222 35.767444 85.075733 
 127.203444 35.767444 82.316908 
 127.203667 35.767444 79.738710 
 127.203778 35.767444 78.536843 
 127.203889 35.767444 77.405146 
 127.204000 35.767444 76.349980 
 127.202889 35.767555 89.424040 
 127.203000 35.767555 87.932851 
 127.203111 35.767555 86.456211 
 127.203222 35.767555 85.003812 
 127.203444 35.767555 82.197680 
 127.203667 35.767555 79.577149 
 127.203778 35.767555 78.356153 
 127.203889 35.767555 77.206796 
 127.204000 35.767555 76.135472 
 127.203000 35.767555 87.932851 
 127.203111 35.767555 86.456211 
 127.203222 35.767555 85.003812 
 127.203333 35.767555 83.580970 
 127.203556 35.767555 80.859697 
 127.203778 35.767555 78.356153 
 127.203889 35.767555 77.206796 
 127.204000 35.767555 76.135472 
 127.204111 35.767555 75.152034 
 127.203000 35.767667 87.929348 
 127.203111 35.767667 86.426329 
 127.203222 35.767667 84.948598 
 127.203333 35.767667 83.501510 
 127.203556 35.767667 80.735395 
 127.203778 35.767667 78.192337 
 127.203889 35.767667 77.025397 
 127.204000 35.767667 75.938006 
 127.204111 35.767667 74.940097 
 127.203000 35.767778 87.942278 
 127.203111 35.767778 86.412953 
 127.203222 35.767778 84.909976 
 127.203333 35.767778 83.438743 
 127.203556 35.767778 80.628021 
 127.203778 35.767778 78.045724 
 127.203889 35.767778 76.861351 
 127.204000 35.767778 75.758050 
 127.204111 35.767778 74.745834 
 127.203111 35.767778 86.412953 
 127.203222 35.767778 84.909976 
 127.203333 35.767778 83.438743 
 127.203444 35.767778 82.009481 
 127.203667 35.767778 79.304705 
 127.203889 35.767778 76.861351 
 127.204000 35.767778 75.758050 
 127.204111 35.767778 74.745834 
 127.204222 35.767778 73.831345 
 127.203111 35.767889 86.415717 
 127.203222 35.767889 84.887509 
 127.203333 35.767889 83.392162 
 127.203444 35.767889 81.940016 
 127.203667 35.767889 79.193386 
 127.203889 35.767889 76.713871 
 127.204000 35.767889 75.594773 
 127.204111 35.767889 74.568373 
 127.204222 35.767889 73.641340 
 127.203111 35.768000 86.434338 
 127.203222 35.768000 84.880972 
 127.203333 35.768000 83.361598 
 127.203444 35.768000 81.886670 
 127.203667 35.768000 79.098424 
 127.203889 35.768000 76.583027 
 127.204000 35.768000 75.448285 
 127.204111 35.768000 74.407861 
 127.204222 35.768000 73.468449 
 127.203222 35.768000 84.880972 
 127.203333 35.768000 83.361598 
 127.203444 35.768000 81.886670 
 127.203556 35.768000 80.462095 
 127.203778 35.768000 77.801914 
 127.204000 35.768000 75.448285 
 127.204111 35.768000 74.407861 
 127.204222 35.768000 73.468449 
 127.204333 35.768000 72.639731 
 127.203222 35.768111 84.890032 
 127.203333 35.768111 83.346774 
 127.203444 35.768111 81.849218 
 127.203556 35.768111 80.403305 
 127.203778 35.768111 77.704664 
 127.204000 35.768111 75.318581 
 127.204111 35.768111 74.264325 
 127.204222 35.768111 73.312728 
 127.204333 35.768111 72.473533 
 127.203222 35.768222 84.914417 
 127.203333 35.768222 83.347350 
 127.203444 35.768222 81.827254 
 127.203556 35.768222 80.360108 
 127.203778 35.768222 77.623249 
 127.204000 35.768222 75.204998 
 127.204111 35.768222 74.137065 
 127.204222 35.768222 73.173446 
 127.204333 35.768222 72.323940 
 127.203333 35.768222 83.347350 
 127.203444 35.768222 81.827254 
 127.203556 35.768222 80.360108 
 127.203667 35.768222 78.956664 
 127.203889 35.768222 76.370499 
 127.204111 35.768222 74.137065 
 127.204222 35.768222 73.173446 
 127.204333 35.768222 72.323940 
 127.204444 35.768222 71.595351 
 127.203333 35.768333 83.363035 
 127.203444 35.768333 81.820580 
 127.203556 35.768333 80.332388 
 127.203667 35.768333 78.909313 
 127.203889 35.768333 76.288306 
 127.204111 35.768333 74.026312 
 127.204222 35.768333 73.050882 
 127.204333 35.768333 72.191275 
 127.204444 35.768333 71.454312 
 127.203333 35.768444 83.393594 
 127.203444 35.768444 81.828897 
 127.203556 35.768444 80.319790 
 127.203667 35.768444 78.877224 
 127.203889 35.768444 76.221687 
 127.204111 35.768444 73.931475 
 127.204222 35.768444 72.944414 
 127.204333 35.768444 72.074889 
 127.204444 35.768444 71.329736 
 127.203444 35.768444 81.828897 
 127.203556 35.768444 80.319790 
 127.203667 35.768444 78.877224 
 127.203778 35.768444 77.507587 
 127.204000 35.768444 75.026162 
 127.204222 35.768444 72.944414 
 127.204333 35.768444 72.074889 
 127.204444 35.768444 71.329736 
 127.204556 35.768444 70.718105 
 127.203444 35.768555 81.851903 
 127.203556 35.768555 80.322094 
 127.203667 35.768555 78.860257 
 127.203778 35.768555 77.472809 
 127.204000 35.768555 74.960419 
 127.204222 35.768555 72.854207 
 127.204333 35.768555 71.974988 
 127.204444 35.768555 71.221865 
 127.204556 35.768555 70.604022 
 127.203444 35.768667 81.889404 
 127.203556 35.768667 80.339048 
 127.203667 35.768667 78.858105 
 127.203778 35.768667 77.453020 
 127.204000 35.768667 74.910034 
 127.204222 35.768667 72.779746 
 127.204333 35.768667 71.891031 
 127.204444 35.768667 71.130135 
 127.204556 35.768667 70.506276 
 127.203556 35.768667 80.339048 
 127.203667 35.768667 78.858105 
 127.203778 35.768667 77.453020 
 127.203889 35.768667 76.134768 
 127.204111 35.768667 73.789418 
 127.204333 35.768667 71.891031 
 127.204444 35.768667 71.130135 
 127.204556 35.768667 70.506276 
 127.204667 35.768667 70.026245 
 127.203556 35.768778 80.370400 
 127.203667 35.768778 78.870559 
 127.203778 35.768778 77.448053 
 127.203889 35.768778 76.113935 
 127.204111 35.768778 73.741653 
 127.204333 35.768778 71.823006 
 127.204444 35.768778 71.054554 
 127.204556 35.768778 70.424890 
 127.204667 35.768778 69.940808 
 127.203556 35.768889 80.415798 
 127.203667 35.768889 78.897313 
 127.203778 35.768889 77.457640 
 127.203889 35.768889 76.107911 
 127.204111 35.768889 73.709205 
 127.204333 35.768889 71.770789 
 127.204444 35.768889 70.995016 
 127.204556 35.768889 70.359771 
 127.204667 35.768889 69.871853 
 127.203667 35.768889 78.897313 
 127.203778 35.768889 77.457640 
 127.203889 35.768889 76.107911 
 127.204000 35.768889 74.854857 
 127.204222 35.768889 72.677813 
 127.204444 35.768889 70.995016 
 127.204556 35.768889 70.359771 
 127.204667 35.768889 69.871853 
 127.204778 35.768889 69.539499 
 127.203667 35.769000 78.938210 
 127.203778 35.769000 77.481576 
 127.203889 35.769000 76.116448 
 127.204000 35.769000 74.849577 
 127.204222 35.769000 72.649840 
 127.204444 35.769000 70.951120 
 127.204556 35.769000 70.310504 
 127.204667 35.769000 69.818952 
 127.204778 35.769000 69.484708 
 127.203667 35.769111 78.992863 
 127.203778 35.769111 77.519542 
 127.203889 35.769111 76.139287 
 127.204000 35.769111 74.858869 
 127.204222 35.769111 72.636966 
 127.204444 35.769111 70.922819 
 127.204556 35.769111 70.277064 
 127.204667 35.769111 69.782095 
 127.204778 35.769111 69.446164 
 127.203778 35.769111 77.519542 
 127.203889 35.769111 76.139287 
 127.204000 35.769111 74.858869 
 127.204111 35.769111 73.689133 
 127.204333 35.769111 71.712563 
 127.204556 35.769111 70.277064 
 127.204667 35.769111 69.782095 
 127.204778 35.769111 69.446164 
 127.204889 35.769111 69.275866 
 127.203778 35.769222 77.571431 
 127.203889 35.769222 76.176278 
 127.204000 35.769222 74.882544 
 127.204111 35.769222 73.701132 
 127.204333 35.769222 71.706200 
 127.204556 35.769222 70.259137 
 127.204667 35.769222 69.760960 
 127.204778 35.769222 69.423541 
 127.204889 35.769222 69.253463 
 127.203778 35.769333 77.636829 
 127.203889 35.769333 76.227067 
 127.204000 35.769333 74.920301 
 127.204111 35.769333 73.727490 
 127.204333 35.769333 71.714728 
 127.204556 35.769333 70.256589 
 127.204667 35.769333 69.755425 
 127.204778 35.769333 69.416721 
 127.204889 35.769333 69.247047 
 127.203778 35.769444 77.715725 
 127.203889 35.769444 76.291599 
 127.204000 35.769444 74.972049 
 127.204111 35.769444 73.768084 
 127.204333 35.769444 71.737972 
 127.204556 35.769444 70.269208 
 127.204667 35.769444 69.765270 
 127.204778 35.769444 69.425480 
 127.204889 35.769444 69.256397 
 127.203889 35.769444 76.291599 
 127.204000 35.769444 74.972049 
 127.204111 35.769444 73.768084 
 127.204222 35.769444 72.686623 
 127.204444 35.769444 70.929038 
 127.204667 35.769444 69.765270 
 127.204778 35.769444 69.425480 
 127.204889 35.769444 69.256397 
 127.205000 35.769444 69.264947 
 127.203889 35.769555 76.369426 
 127.204000 35.769555 75.037387 
 127.204111 35.769555 73.822558 
 127.204222 35.769555 72.731864 
 127.204444 35.769555 70.960805 
 127.204667 35.769555 69.790260 
 127.204778 35.769555 69.449588 
 127.204889 35.769555 69.281277 
 127.205000 35.769555 69.292234 
 127.203889 35.769667 76.460589 
 127.204000 35.769667 75.116322 
 127.204111 35.769667 73.890885 
 127.204222 35.769667 72.791209 
 127.204444 35.769667 71.007159 
 127.204667 35.769667 69.830278 
 127.204778 35.769667 69.488923 
 127.204889 35.769667 69.321569 
 127.205000 35.769667 69.335097 
 127.204000 35.769667 75.116322 
 127.204111 35.769667 73.890885 
 127.204222 35.769667 72.791209 
 127.204333 35.769667 71.827665 
 127.204556 35.769667 70.339106 
 127.204778 35.769667 69.488923 
 127.204889 35.769667 69.321569 
 127.205000 35.769667 69.335097 
 127.205111 35.769667 69.535686 
 127.204000 35.769778 75.208531 
 127.204111 35.769778 73.972767 
 127.204222 35.769778 72.864382 
 127.204333 35.769778 71.893775 
 127.204556 35.769778 70.396034 
 127.204778 35.769778 69.543250 
 127.204889 35.769778 69.377033 
 127.205000 35.769778 69.393291 
 127.205111 35.769778 69.598178 
 127.204000 35.769889 75.313603 
 127.204111 35.769889 74.067812 
 127.204222 35.769889 72.951007 
 127.204333 35.769889 71.973613 
 127.204556 35.769889 70.467192 
 127.204778 35.769889 69.612228 
 127.204889 35.769889 69.447324 
 127.205000 35.769889 69.466463 
 127.205111 35.769889 69.675770 
 127.204111 35.769889 74.067812 
 127.204222 35.769889 72.951007 
 127.204333 35.769889 71.973613 
 127.204444 35.769889 71.142530 
 127.204667 35.769889 69.954347 
 127.204889 35.769889 69.447324 
 127.205000 35.769889 69.466463 
 127.205111 35.769889 69.675770 
 127.205222 35.769889 70.080490 
 127.204111 35.770000 74.176132 
 127.204222 35.770000 73.051171 
 127.204333 35.770000 72.067245 
 127.204444 35.770000 71.231246 
 127.204667 35.770000 70.038087 
 127.204889 35.770000 69.532469 
 127.205000 35.770000 69.554646 
 127.205111 35.770000 69.768508 
 127.205222 35.770000 70.179252 
 127.204111 35.770111 74.297140 
 127.204222 35.770111 73.164318 
 127.204333 35.770111 72.174136 
 127.204444 35.770111 71.333482 
 127.204667 35.770111 70.135808 
 127.204889 35.770111 69.631960 
 127.205000 35.770111 69.657317 
 127.205111 35.770111 69.875847 
 127.205222 35.770111 70.292698 
 127.204222 35.770111 73.164318 
 127.204333 35.770111 72.174136 
 127.204444 35.770111 71.333482 
 127.204556 35.770111 70.651799 
 127.204778 35.770111 69.793713 
 127.205000 35.770111 69.657317 
 127.205111 35.770111 69.875847 
 127.205222 35.770111 70.292698 
 127.205333 35.770111 70.913457 
 127.204222 35.770222 73.290622 
 127.204333 35.770222 72.294445 
 127.204444 35.770222 71.449380 
 127.204556 35.770222 70.764875 
 127.204778 35.770222 69.905840 
 127.205000 35.770222 69.774606 
 127.205111 35.770222 69.997928 
 127.205222 35.770222 70.420984 
 127.205333 35.770222 71.049320 
 127.204222 35.770333 73.429439 
 127.204333 35.770333 72.427544 
 127.204444 35.770333 71.578329 
 127.204556 35.770333 70.891239 
 127.204778 35.770333 70.031660 
 127.205000 35.770333 69.905883 
 127.205111 35.770333 70.134100 
 127.205222 35.770333 70.563431 
 127.205333 35.770333 71.199381 
 127.204333 35.770333 72.427544 
 127.204444 35.770333 71.578329 
 127.204556 35.770333 70.891239 
 127.204667 35.770333 70.372960 
 127.204889 35.770333 69.873736 
 127.205111 35.770333 70.134100 
 127.205222 35.770333 70.563431 
 127.205333 35.770333 71.199381 
 127.205444 35.770333 72.045179 
 127.204333 35.770444 72.573679 
 127.204444 35.770444 71.720560 
 127.204556 35.770444 71.031114 
 127.204667 35.770444 70.512006 
 127.204889 35.770444 70.015622 
 127.205111 35.770444 70.284597 
 127.205222 35.770444 70.720287 
 127.205333 35.770444 71.363905 
 127.205444 35.770444 72.218609 
 127.204333 35.770556 72.732419 
 127.204444 35.770556 71.875647 
 127.204556 35.770556 71.184075 
 127.204667 35.770556 70.664348 
 127.204889 35.770556 70.171145 
 127.205111 35.770556 70.448957 
 127.205222 35.770556 70.891074 
 127.205333 35.770556 71.542394 
 127.205444 35.770556 72.406003 
 127.204444 35.770556 71.875647 
 127.204556 35.770556 71.184075 
 127.204667 35.770556 70.664348 
 127.204778 35.770556 70.324592 
 127.205000 35.770556 70.210624 
 127.205222 35.770556 70.891074 
 127.205333 35.770556 71.542394 
 127.205444 35.770556 72.406003 
 127.205556 35.770556 73.486729 
 127.204444 35.770667 72.043076 
 127.204556 35.770667 71.349611 
 127.204667 35.770667 70.829470 
 127.204778 35.770667 70.490755 
 127.205000 35.770667 70.383099 
 127.205222 35.770667 71.075214 
 127.205333 35.770667 71.734248 
 127.205444 35.770667 72.606738 
 127.205556 35.770667 73.697457 
 127.204444 35.770778 72.223209 
 127.204556 35.770778 71.528072 
 127.204667 35.770778 71.007719 
 127.204778 35.770778 70.670222 
 127.205000 35.770778 70.569153 
 127.205222 35.770778 71.273090 
 127.205333 35.770778 71.939870 
 127.205444 35.770778 72.821236 
 127.205556 35.770778 73.921909 
 127.204556 35.770778 71.528072 
 127.204667 35.770778 71.007719 
 127.204778 35.770778 70.670222 
 127.204889 35.770778 70.521856 
 127.205111 35.770778 70.817960 
 127.205333 35.770778 71.939870 
 127.205444 35.770778 72.821236 
 127.205556 35.770778 73.921909 
 127.205667 35.770778 75.242825 
 127.204556 35.770889 71.718627 
 127.204667 35.770889 71.198259 
 127.204778 35.770889 70.862148 
 127.204889 35.770889 70.716535 
 127.205111 35.770889 71.022067 
 127.205333 35.770889 72.158288 
 127.205444 35.770889 73.048488 
 127.205556 35.770889 74.159032 
 127.205667 35.770889 75.490767 
 127.204556 35.771000 71.921713 
 127.204667 35.771000 71.401523 
 127.204778 35.771000 71.066966 
 127.204889 35.771000 70.924247 
 127.205111 35.771000 71.239397 
 127.205333 35.771000 72.389990 
 127.205444 35.771000 73.289000 
 127.205556 35.771000 74.409355 
 127.205667 35.771000 75.751812 
 127.204556 35.771111 72.136410 
 127.204667 35.771111 71.616587 
 127.204778 35.771111 71.283741 
 127.204889 35.771111 71.144039 
 127.205111 35.771111 71.468951 
 127.205333 35.771111 72.633910 
 127.205444 35.771111 73.541668 
 127.205556 35.771111 74.671731 
 127.205667 35.771111 76.024763 
 127.204667 35.771111 71.616587 
 127.204778 35.771111 71.283741 
 127.204889 35.771111 71.144039 
 127.205000 35.771111 71.203870 
 127.205222 35.771111 71.943906 
 127.205444 35.771111 73.541668 
 127.205556 35.771111 74.671731 
 127.205667 35.771111 76.024763 
 127.205778 35.771111 77.604621 
 127.204667 35.771222 71.843966 
 127.204778 35.771222 71.512988 
 127.204889 35.771222 71.376432 
 127.205000 35.771222 71.440634 
 127.205222 35.771222 72.192887 
 127.205444 35.771222 73.807080 
 127.205556 35.771222 74.946769 
 127.205667 35.771222 76.310257 
 127.205778 35.771222 77.901334 
 127.204667 35.771333 72.083071 
 127.204778 35.771333 71.754110 
 127.204889 35.771333 71.620816 
 127.205000 35.771333 71.689473 
 127.205222 35.771333 72.453999 
 127.205444 35.771333 74.084526 
 127.205556 35.771333 75.233733 
 127.205667 35.771333 76.607526 
 127.205778 35.771333 78.209630 
 127.204778 35.771333 71.754110 
 127.204889 35.771333 71.620816 
 127.205000 35.771333 71.689473 
 127.205111 35.771333 71.965704 
 127.205333 35.771333 73.159424 
 127.205556 35.771333 75.233733 
 127.205667 35.771333 76.607526 
 127.205778 35.771333 78.209630 
 127.205889 35.771333 80.038374 
 127.204778 35.771444 72.006428 
 127.204889 35.771444 71.876500 
 127.205000 35.771444 71.949677 
 127.205111 35.771444 72.231536 
 127.205333 35.771444 73.439565 
 127.205556 35.771444 75.531801 
 127.205667 35.771444 76.915720 
 127.205778 35.771444 78.528629 
 127.205889 35.771444 80.368751 
 127.204778 35.771556 72.270576 
 127.204889 35.771556 72.144121 
 127.205000 35.771556 72.221892 
 127.205111 35.771556 72.509417 
 127.205333 35.771556 73.731724 
 127.205556 35.771556 75.841698 
 127.205667 35.771556 77.235589 
 127.205778 35.771556 78.859103 
 127.205889 35.771556 80.710364 
 127.204889 35.771556 72.144121 
 127.205000 35.771556 72.221892 
 127.205111 35.771556 72.509417 
 127.205222 35.771556 73.011043 
 127.205444 35.771556 74.673840 
 127.205667 35.771556 77.235589 
 127.205778 35.771556 78.859103 
 127.205889 35.771556 80.710364 
 127.206000 35.771556 82.792194 
 127.204889 35.771667 72.422515 
 127.205000 35.771667 72.504931 
 127.205111 35.771667 72.798133 
 127.205222 35.771667 73.306395 
 127.205444 35.771667 74.985089 
 127.205667 35.771667 77.565717 
 127.205778 35.771667 79.199591 
 127.205889 35.771667 81.061699 
 127.206000 35.771667 83.154792 
 127.204889 35.771778 72.712395 
 127.205000 35.771778 72.799513 
 127.205111 35.771778 73.098414 
 127.205222 35.771778 73.613296 
 127.205444 35.771778 75.307733 
 127.205667 35.771778 77.906924 
 127.205778 35.771778 79.550936 
 127.205889 35.771778 81.423625 
 127.206000 35.771778 83.527670 
 127.205000 35.771778 72.799513 
 127.205111 35.771778 73.098414 
 127.205222 35.771778 73.613296 
 127.205333 35.771778 74.349000 
 127.205556 35.771778 76.493674 
 127.205778 35.771778 79.550936 
 127.205889 35.771778 81.423625 
 127.206000 35.771778 83.527670 
 127.206111 35.771778 85.860670 
 127.205000 35.771889 73.104372 
 127.205111 35.771889 73.408963 
 127.205222 35.771889 73.930416 
 127.205333 35.771889 74.673511 
 127.205556 35.771889 76.835104 
 127.205778 35.771889 79.911599 
 127.205889 35.771889 81.794555 
 127.206000 35.771889 83.909190 
 127.206111 35.771889 86.253006 
 127.205000 35.772000 73.420301 
 127.205111 35.772000 73.730584 
 127.205222 35.772000 74.258571 
 127.205333 35.772000 75.008981 
 127.205556 35.772000 77.187212 
 127.205778 35.772000 80.282489 
 127.205889 35.772000 82.175419 
 127.206000 35.772000 84.300308 
 127.206111 35.772000 86.654557 
 127.205111 35.772000 73.730584 
 127.205222 35.772000 74.258571 
 127.205333 35.772000 75.008981 
 127.205444 35.772000 75.983846 
 127.205667 35.772000 78.618990 
 127.205889 35.772000 82.175419 
 127.206000 35.772000 84.300308 
 127.206111 35.772000 86.654557 
 127.206222 35.772000 89.234082 
 127.205111 35.772111 74.061905 
 127.205222 35.772111 74.596357 
 127.205333 35.772111 75.353967 
 127.205444 35.772111 76.336682 
 127.205667 35.772111 78.989171 
 127.205889 35.772111 82.564562 
 127.206000 35.772111 84.699320 
 127.206111 35.772111 87.063572 
 127.206222 35.772111 89.653133 
 127.205111 35.772222 74.403798 
 127.205222 35.772222 74.944657 
 127.205333 35.772222 75.709369 
 127.205444 35.772222 76.699792 
 127.205667 35.772222 79.369212 
 127.205889 35.772222 82.962974 
 127.206000 35.772222 85.107238 
 127.206111 35.772222 87.481085 
 127.206222 35.772222 90.080228 
 127.205222 35.772222 74.944657 
 127.205333 35.772222 75.709369 
 127.205444 35.772222 76.699792 
 127.205556 35.772222 77.919834 
 127.205778 35.772222 81.051092 
 127.206000 35.772222 85.107238 
 127.206111 35.772222 87.481085 
 127.206222 35.772222 90.080228 
 127.206333 35.772222 92.905820 
 127.205222 35.772333 75.302619 
 127.205333 35.772333 76.074310 
 127.205444 35.772333 77.072275 
 127.205556 35.772333 78.300351 
 127.205778 35.772333 81.448791 
 127.206000 35.772333 85.523021 
 127.206111 35.772333 87.906023 
 127.206222 35.772333 90.514265 
 127.206333 35.772333 93.348821 
 127.205222 35.772444 75.669322 
 127.205333 35.772444 76.447848 
 127.205444 35.772444 77.453164 
 127.205556 35.772444 78.689039 
 127.205778 35.772444 81.854051 
 127.206000 35.772444 85.945571 
 127.206111 35.772444 88.337264 
 127.206222 35.772444 90.954095 
 127.206333 35.772444 93.797058 
 127.205333 35.772444 76.447848 
 127.205444 35.772444 77.453164 
 127.205556 35.772444 78.689039 
 127.205667 35.772444 80.154996 
 127.205889 35.772444 83.783501 
 127.206111 35.772444 88.337264 
 127.206222 35.772444 90.954095 
 127.206333 35.772444 93.797058 
 127.206444 35.772444 96.857828 
 127.205333 35.772556 76.830976 
 127.205444 35.772556 77.843468 
 127.205556 35.772556 79.086921 
 127.205667 35.772556 80.560761 
 127.205889 35.772556 84.205619 
 127.206111 35.772556 88.775915 
 127.206222 35.772556 91.400842 
 127.206333 35.772556 94.251675 
 127.206444 35.772556 97.319986 
 127.205333 35.772667 77.222086 
 127.205444 35.772667 78.241541 
 127.205556 35.772667 79.492313 
 127.205667 35.772667 80.973732 
 127.205889 35.772667 84.634197 
 127.206111 35.772667 89.220095 
 127.206222 35.772667 91.852586 
 127.206333 35.772667 94.710713 
 127.206444 35.772667 97.785945 
 127.205333 35.772778 77.622232 
 127.205444 35.772778 78.648450 
 127.205556 35.772778 79.906297 
 127.205667 35.772778 81.395004 
 127.205889 35.772778 85.070358 
 127.206111 35.772778 89.670959 
 127.206222 35.772778 92.310496 
 127.206333 35.772778 95.175354 
 127.206444 35.772778 98.256901 
 127.205444 35.772778 78.648450 
 127.205556 35.772778 79.906297 
 127.205667 35.772778 81.395004 
 127.205778 35.772778 83.117360 
 127.206000 35.772778 87.255987 
 127.206222 35.772778 92.310496 
 127.206333 35.772778 95.175354 
 127.206444 35.772778 98.256901 
 127.206556 35.772778 101.555076 
 127.205444 35.772889 79.062492 
 127.205556 35.772889 80.327133 
 127.205667 35.772889 81.822802 
 127.205778 35.772889 83.552211 
 127.206000 35.772889 87.704839 
 127.206222 35.772889 92.772613 
 127.206333 35.772889 95.643605 
 127.206444 35.772889 98.730828 
 127.206556 35.772889 102.034143 
 127.205444 35.773000 79.484790 
 127.205556 35.773000 80.755956 
 127.205667 35.773000 82.258273 
 127.205778 35.773000 83.994375 
 127.206000 35.773000 88.160144 
 127.206222 35.773000 93.240144 
 127.206333 35.773000 96.116683 
 127.206444 35.773000 99.208953 
 127.206556 35.773000 102.516735 
 127.205556 35.773000 80.755956 
 127.205667 35.773000 82.258273 
 127.205778 35.773000 83.994375 
 127.205889 35.773000 85.961055 
 127.206111 35.773000 90.588163 
 127.206333 35.773000 96.116683 
 127.206444 35.773000 99.208953 
 127.206556 35.773000 102.516735 
 127.206667 35.773000 106.029051 
 127.205556 35.773111 81.191732 
 127.205667 35.773111 82.700358 
 127.205778 35.773111 84.442768 
 127.205889 35.773111 86.415657 
 127.206111 35.773111 91.054547 
 127.206333 35.773111 96.593392 
 127.206444 35.773111 99.690058 
 127.206556 35.773111 103.001617 
 127.206667 35.773111 106.516998 
 127.205556 35.773222 81.633380 
 127.205667 35.773222 83.147957 
 127.205778 35.773222 84.896270 
 127.205889 35.773222 86.874916 
 127.206111 35.773222 91.524552 
 127.206333 35.773222 97.072513 
 127.206444 35.773222 100.172910 
 127.206556 35.773222 103.487539 
 127.206667 35.773222 107.005243 
 127.205667 35.773222 83.147957 
 127.205778 35.773222 84.896270 
 127.205889 35.773222 86.874916 
 127.206000 35.773222 89.085566 
 127.206222 35.773222 94.186723 
 127.206444 35.773222 100.172910 
 127.206556 35.773222 103.487539 
 127.206667 35.773222 107.005243 
 127.206778 35.773222 110.724866 
 127.205667 35.773333 83.602285 
 127.205778 35.773333 85.356105 
 127.205889 35.773333 87.340067 
 127.206000 35.773333 89.555762 
 127.206222 35.773333 94.665826 
 127.206444 35.773333 100.658774 
 127.206556 35.773333 103.975768 
 127.206667 35.773333 107.495051 
 127.206778 35.773333 111.215392 
 127.205667 35.773444 84.061459 
 127.205778 35.773444 85.820360 
 127.205889 35.773444 87.809167 
 127.206000 35.773444 90.029391 
 127.206222 35.773444 95.147203 
 127.206444 35.773444 101.145587 
 127.206556 35.773444 104.464225 
 127.206667 35.773444 107.984330 
 127.206778 35.773444 111.704596 
 127.205778 35.773444 85.820360 
 127.205889 35.773444 87.809167 
 127.206000 35.773444 90.029391 
 127.206111 35.773444 92.477180 
 127.206333 35.773444 98.039736 
 127.206556 35.773444 104.464225 
 127.206667 35.773444 107.984330 
 127.206778 35.773444 111.704596 
 127.206889 35.773444 115.611694 
 127.205778 35.773556 86.290300 
 127.205889 35.773556 88.283488 
 127.206000 35.773556 90.507732 
 127.206111 35.773556 92.959089 
 127.206333 35.773556 98.527081 
 127.206556 35.773556 104.954194 
 127.206667 35.773556 108.474359 
 127.206778 35.773556 112.193750 
 127.206889 35.773556 116.098968 
 127.205778 35.773667 86.763983 
 127.205889 35.773667 88.761062 
 127.206000 35.773667 90.988791 
 127.206111 35.773667 93.443139 
 127.206333 35.773667 99.015291 
 127.206556 35.773667 105.443598 
 127.206667 35.773667 108.963053 
 127.206778 35.773667 112.680766 
 127.206889 35.773667 116.583272 
 127.205889 35.773667 88.761062 
 127.206000 35.773667 90.988791 
 127.206111 35.773667 93.443139 
 127.206222 35.773667 96.118600 
 127.206444 35.773667 102.123852 
 127.206667 35.773667 108.963053 
 127.206778 35.773667 112.680766 
 127.206889 35.773667 116.583272 
 127.207000 35.773667 120.668402 
 127.205889 35.773778 89.243195 
 127.206000 35.773778 91.473879 
 127.206111 35.773778 93.930642 
 127.206222 35.773778 96.607895 
 127.206444 35.773778 102.614542 
 127.206667 35.773778 109.451701 
 127.206778 35.773778 113.166921 
 127.206889 35.773778 117.065866 
 127.207000 35.773778 121.146298 
 127.205889 35.773889 89.728734 
 127.206000 35.773889 91.961825 
 127.206111 35.773889 94.420414 
 127.206222 35.773889 97.098827 
 127.206444 35.773889 103.105487 
 127.206667 35.773889 109.939072 
 127.206778 35.773889 113.650980 
 127.206889 35.773889 117.545514 
 127.207000 35.773889 121.620370 
 127.206000 35.773889 91.961825 
 127.206111 35.773889 94.420414 
 127.206222 35.773889 97.098827 
 127.206333 35.773889 99.997025 
 127.206556 35.773889 106.423375 
 127.206778 35.773889 113.650980 
 127.206889 35.773889 117.545514 
 127.207000 35.773889 121.620370 
 127.207111 35.773889 125.860151 
 127.206000 35.774000 92.451445 
 127.206111 35.774000 94.911259 
 127.206222 35.774000 97.590194 
 127.206333 35.774000 100.488131 
 127.206556 35.774000 106.911307 
 127.206778 35.774000 114.131731 
 127.206889 35.774000 118.021011 
 127.207000 35.774000 122.089418 
 127.207111 35.774000 126.321515 
 127.206000 35.774111 92.944088 
 127.206111 35.774111 95.404525 
 127.206222 35.774111 98.083335 
 127.206333 35.774111 100.980324 
 127.206556 35.774111 107.398837 
 127.206778 35.774111 114.610449 
 127.206889 35.774111 118.493609 
 127.207000 35.774111 122.554673 
 127.207111 35.774111 126.778161 
 127.206111 35.774222 95.898177 
 127.206222 35.774222 98.576211 
 127.206333 35.774222 101.471562 
 127.206444 35.774222 104.574489 
 127.206667 35.774222 111.388075 
 127.206889 35.774222 118.961311 
 127.207000 35.774222 123.014158 
 127.207111 35.774222 127.228144 
 127.207222 35.774222 131.600154 
 127.206111 35.774333 96.393581 
 127.206222 35.774333 99.070178 
 127.206333 35.774333 101.963190 
 127.206444 35.774333 105.062807 
 127.206667 35.774333 111.866587 
 127.206889 35.774333 119.425359 
 127.207000 35.774333 123.469088 
 127.207111 35.774333 127.672644 
 127.207222 35.774333 132.032856 
 127.206111 35.774444 96.888706 
 127.206222 35.774444 99.563203 
 127.206333 35.774444 102.453177 
 127.206444 35.774444 105.548753 
 127.206667 35.774444 112.341167 
 127.206889 35.774444 119.883805 
 127.207000 35.774444 123.917542 
 127.207111 35.774444 128.109778 
 127.207222 35.774444 132.457281 
 127.206222 35.774444 99.563203 
 127.206333 35.774444 102.453177 
 127.206444 35.774444 105.548753 
 127.206556 35.774444 108.848723 
 127.206778 35.774444 116.024138 
 127.207000 35.774444 123.917542 
 127.207111 35.774444 128.109778 
 127.207222 35.774444 132.457281 
 127.207333 35.774444 136.942935 
 127.206222 35.774556 100.056657 
 127.206333 35.774556 102.942878 
 127.206444 35.774556 106.033662 
 127.206556 35.774556 109.327728 
 127.206778 35.774556 116.487777 
 127.207000 35.774556 124.360718 
 127.207111 35.774556 128.540702 
 127.207222 35.774556 132.874545 
 127.207333 35.774556 137.345120 
 127.206222 35.774667 100.548522 
 127.206333 35.774667 103.430284 
 127.206444 35.774667 106.515537 
 127.206556 35.774667 109.802930 
 127.206778 35.774667 116.945994 
 127.207000 35.774667 124.796756 
 127.207111 35.774667 128.963602 
 127.207222 35.774667 133.282881 
 127.207333 35.774667 137.737463 
 127.206333 35.774667 103.430284 
 127.206444 35.774667 106.515537 
 127.206556 35.774667 109.802930 
 127.206667 35.774667 113.280442 
 127.206889 35.774667 120.785681 
 127.207111 35.774667 128.963602 
 127.207222 35.774667 133.282881 
 127.207333 35.774667 137.737463 
 127.207444 35.774667 142.323506 
 127.206333 35.774778 103.916755 
 127.206444 35.774778 106.995717 
 127.206556 35.774778 110.275641 
 127.206667 35.774778 113.744463 
 127.206889 35.774778 121.228429 
 127.207111 35.774778 129.379611 
 127.207222 35.774778 133.683376 
 127.207333 35.774778 138.120997 
 127.207444 35.774778 142.688588 
 127.206333 35.774889 104.401137 
 127.206444 35.774889 107.473054 
 127.206556 35.774889 110.744724 
 127.206667 35.774889 114.204043 
 127.206889 35.774889 121.665031 
 127.207111 35.774889 129.787680 
 127.207222 35.774889 134.075010 
 127.207333 35.774889 138.494735 
 127.207444 35.774889 143.042928 
 127.206444 35.774889 107.473054 
 127.206556 35.774889 110.744724 
 127.206667 35.774889 114.204043 
 127.206778 35.774889 117.848799 
 127.207000 35.774889 125.649873 
 127.207222 35.774889 134.075010 
 127.207333 35.774889 138.494735 
 127.207444 35.774889 143.042928 
 127.207556 35.774889 147.701206 
 127.206444 35.775000 107.946431 
 127.206556 35.775000 111.209077 
 127.206667 35.775000 114.658096 
 127.206778 35.775000 118.291215 
 127.207000 35.775000 126.064871 
 127.207222 35.775000 134.456839 
 127.207333 35.775000 138.857773 
 127.207444 35.775000 143.385662 
 127.207556 35.775000 148.022151 
 127.206444 35.775111 108.417183 
 127.206556 35.775111 111.670002 
 127.206667 35.775111 115.107890 
 127.206778 35.775111 118.728512 
 127.207000 35.775111 126.472963 
 127.207222 35.775111 134.829897 
 127.207333 35.775111 139.211084 
 127.207444 35.775111 143.717703 
 127.207556 35.775111 148.331427 
 127.206556 35.775111 111.670002 
 127.206667 35.775111 115.107890 
 127.206778 35.775111 118.728512 
 127.206889 35.775111 122.517863 
 127.207111 35.775111 130.578154 
 127.207333 35.775111 139.211084 
 127.207444 35.775111 143.717703 
 127.207556 35.775111 148.331427 
 127.207667 35.775111 153.047875 
 127.206556 35.775222 112.125627 
 127.206667 35.775222 115.551593 
 127.206778 35.775222 119.158905 
 127.206889 35.775222 122.933541 
 127.207111 35.775222 130.960030 
 127.207333 35.775222 139.553194 
 127.207444 35.775222 144.037657 
 127.207556 35.775222 148.627729 
 127.207667 35.775222 153.318997 
 127.206556 35.775333 112.577246 
 127.206667 35.775333 115.990457 
 127.206778 35.775333 119.583602 
 127.206889 35.775333 123.342645 
 127.207111 35.775333 131.333513 
 127.207333 35.775333 139.885037 
 127.207444 35.775333 144.346389 
 127.207556 35.775333 148.911850 
 127.207667 35.775333 153.576975 
 127.206667 35.775333 115.990457 
 127.206778 35.775333 119.583602 
 127.206889 35.775333 123.342645 
 127.207000 35.775333 127.264500 
 127.207222 35.775333 135.546048 
 127.207444 35.775333 144.346389 
 127.207556 35.775333 148.911850 
 127.207667 35.775333 153.576975 
 127.207778 35.775333 158.322571 
 127.206667 35.775444 116.422712 
 127.206778 35.775444 120.000884 
 127.206889 35.775444 123.743512 
 127.207000 35.775444 127.647459 
 127.207222 35.775444 135.888685 
 127.207444 35.775444 144.642619 
 127.207556 35.775444 149.182603 
 127.207667 35.775444 153.820721 
 127.207778 35.775444 158.537841 
 127.206667 35.775556 116.849593 
 127.206778 35.775556 120.411939 
 127.206889 35.775556 124.137278 
 127.207000 35.775556 128.022424 
 127.207222 35.775556 136.221502 
 127.207444 35.775556 144.927160 
 127.207556 35.775556 149.440726 
 127.207667 35.775556 154.050895 
 127.207778 35.775556 158.738597 
 127.206778 35.775556 120.411939 
 127.206889 35.775556 124.137278 
 127.207000 35.775556 128.022424 
 127.207111 35.775556 132.051739 
 127.207333 35.775556 140.514696 
 127.207556 35.775556 149.440726 
 127.207667 35.775556 154.050895 
 127.207778 35.775556 158.738597 
 127.207889 35.775556 163.499105 
 127.206778 35.775667 120.815805 
 127.206889 35.775667 124.523016 
 127.207000 35.775667 128.388505 
 127.207111 35.775667 132.396652 
 127.207333 35.775667 140.812641 
 127.207556 35.775667 149.685567 
 127.207667 35.775667 154.266900 
 127.207778 35.775667 158.924306 
 127.207889 35.775667 163.653036 
 127.206778 35.775778 121.211586 
 127.206889 35.775778 124.899867 
 127.207000 35.775778 128.744887 
 127.207111 35.775778 132.731044 
 127.207333 35.775778 141.098411 
 127.207556 35.775778 149.916579 
 127.207667 35.775778 154.468258 
 127.207778 35.775778 159.094555 
 127.207889 35.775778 163.790708 
 127.206778 35.775889 121.600433 
 127.206889 35.775889 125.268925 
 127.207000 35.775889 129.092600 
 127.207111 35.775889 133.055881 
 127.207333 35.775889 141.372825 
 127.207556 35.775889 150.134418 
 127.207667 35.775889 154.655534 
 127.207778 35.775889 159.249821 
 127.207889 35.775889 163.912500 
 127.206889 35.775889 125.268925 
 127.207000 35.775889 129.092600 
 127.207111 35.775889 133.055881 
 127.207222 35.775889 137.154924 
 127.207444 35.775889 145.705324 
 127.207667 35.775889 154.655534 
 127.207778 35.775889 159.249821 
 127.207889 35.775889 163.912500 
 127.208000 35.775889 168.624130 
 127.206889 35.776000 125.628733 
 127.207000 35.776000 129.430269 
 127.207111 35.776000 133.369876 
 127.207222 35.776000 137.443669 
 127.207444 35.776000 145.938952 
 127.207667 35.776000 154.827978 
 127.207778 35.776000 159.389477 
 127.207889 35.776000 164.017919 
 127.208000 35.776000 168.693958 
 127.206889 35.776111 125.980354 
 127.207000 35.776111 129.758892 
 127.207111 35.776111 133.673952 
 127.207222 35.776111 137.721617 
 127.207444 35.776111 146.160016 
 127.207667 35.776111 154.986093 
 127.207778 35.776111 159.513932 
 127.207889 35.776111 164.107271 
 127.208000 35.776111 168.746867 
 127.207000 35.776111 129.758892 
 127.207111 35.776111 133.673952 
 127.207222 35.776111 137.721617 
 127.207333 35.776111 141.885078 
 127.207556 35.776111 150.528559 
 127.207778 35.776111 159.513932 
 127.207889 35.776111 164.107271 
 127.208000 35.776111 168.746867 
 127.208111 35.776111 173.427842 
 127.207000 35.776222 130.077187 
 127.207111 35.776222 133.966927 
 127.207222 35.776222 137.987687 
 127.207333 35.776222 142.122712 
 127.207556 35.776222 150.704719 
 127.207778 35.776222 159.622705 
 127.207889 35.776222 164.180215 
 127.208000 35.776222 168.782661 
 127.208111 35.776222 173.425161 
 127.207000 35.776333 130.386116 
 127.207111 35.776333 134.249685 
 127.207222 35.776333 138.242683 
 127.207333 35.776333 142.348413 
 127.207556 35.776333 150.867231 
 127.207778 35.776333 159.716138 
 127.207889 35.776333 164.236988 
 127.208000 35.776333 168.801468 
 127.208111 35.776333 173.404692 
 127.207111 35.776333 134.249685 
 127.207222 35.776333 138.242683 
 127.207333 35.776333 142.348413 
 127.207444 35.776333 146.562503 
 127.207667 35.776333 155.257944 
 127.207889 35.776333 164.236988 
 127.208000 35.776333 168.801468 
 127.208111 35.776333 173.404692 
 127.208222 35.776333 178.027371 
 127.207111 35.776444 134.521147 
 127.207222 35.776444 138.485635 
 127.207333 35.776444 142.561326 
 127.207444 35.776444 146.743825 
 127.207667 35.776444 155.371648 
 127.207889 35.776444 164.277403 
 127.208000 35.776444 168.803250 
 127.208111 35.776444 173.366555 
 127.208222 35.776444 177.948154 
 127.207111 35.776556 134.782156 
 127.207222 35.776556 138.717302 
 127.207333 35.776556 142.762121 
 127.207444 35.776556 146.912198 
 127.207667 35.776556 155.470761 
 127.207889 35.776556 164.301624 
 127.208000 35.776556 168.788062 
 127.208111 35.776556 173.310687 
 127.208222 35.776556 177.850468 
 127.207222 35.776556 138.717302 
 127.207333 35.776556 142.762121 
 127.207444 35.776556 146.912198 
 127.207556 35.776556 151.149972 
 127.207778 35.776556 159.856257 
 127.208000 35.776556 168.788062 
 127.208111 35.776556 173.310687 
 127.208222 35.776556 177.850468 
 127.208333 35.776556 182.402588 
 127.207222 35.776667 138.937196 
 127.207333 35.776667 142.950378 
 127.207444 35.776667 147.067273 
 127.207556 35.776667 151.270405 
 127.207778 35.776667 159.903101 
 127.208000 35.776667 168.755955 
 127.208111 35.776667 173.237230 
 127.208222 35.776667 177.734548 
 127.208333 35.776667 182.243100 
 127.207222 35.776778 139.144928 
 127.207333 35.776778 143.125780 
 127.207444 35.776778 147.208807 
 127.207556 35.776778 151.376627 
 127.207778 35.776778 159.934435 
 127.208000 35.776778 168.707119 
 127.208111 35.776778 173.146471 
 127.208222 35.776778 177.600778 
 127.208333 35.776778 182.065242 
 127.207333 35.776778 143.125780 
 127.207444 35.776778 147.208807 
 127.207556 35.776778 151.376627 
 127.207667 35.776778 155.624534 
 127.207889 35.776778 164.301481 
 127.208111 35.776778 173.146471 
 127.208222 35.776778 177.600778 
 127.208333 35.776778 182.065242 
 127.208444 35.776778 186.521159 
 127.207333 35.776889 143.288921 
 127.207444 35.776889 147.337298 
 127.207556 35.776889 151.469031 
 127.207667 35.776889 155.679405 
 127.207889 35.776889 164.277277 
 127.208111 35.776889 173.038232 
 127.208222 35.776889 177.448857 
 127.208333 35.776889 181.868587 
 127.208444 35.776889 186.278872 
 127.207333 35.777000 143.439254 
 127.207444 35.777000 147.452334 
 127.207556 35.777000 151.547349 
 127.207667 35.777000 155.719573 
 127.207889 35.777000 164.237200 
 127.208111 35.777000 172.913044 
 127.208222 35.777000 177.279490 
 127.208333 35.777000 181.654018 
 127.208444 35.777000 186.018235 
 127.207444 35.777000 147.452334 
 127.207556 35.777000 151.547349 
 127.207667 35.777000 155.719573 
 127.207778 35.777000 159.951140 
 127.208000 35.777000 168.559457 
 127.208222 35.777000 177.279490 
 127.208333 35.777000 181.654018 
 127.208444 35.777000 186.018235 
 127.208556 35.777000 190.367561 
 127.207444 35.777111 147.554359 
 127.207556 35.777111 151.611917 
 127.207667 35.777111 155.745267 
 127.207778 35.777111 159.936659 
 127.208000 35.777111 168.460865 
 127.208222 35.777111 177.092298 
 127.208333 35.777111 181.421026 
 127.208444 35.777111 185.738607 
 127.208556 35.777111 190.040479 
 127.207444 35.777222 147.643088 
 127.207556 35.777222 151.662602 
 127.207667 35.777222 155.756505 
 127.207778 35.777222 159.907174 
 127.208000 35.777222 168.346239 
 127.208222 35.777222 176.888152 
 127.208333 35.777222 181.170665 
 127.208444 35.777222 185.441228 
 127.208556 35.777222 189.695298 
 127.207444 35.777333 147.718914 
 127.207556 35.777333 151.699684 
 127.207667 35.777333 155.753457 
 127.207778 35.777333 159.862734 
 127.208000 35.777333 168.215384 
 127.208222 35.777333 176.666599 
 127.208333 35.777333 180.902349 
 127.208444 35.777333 185.125377 
 127.208556 35.777333 189.331161 
 127.207556 35.777333 151.699684 
 127.207667 35.777333 155.753457 
 127.207778 35.777333 159.862734 
 127.207889 35.777333 164.022671 
 127.208111 35.777333 172.436033 
 127.208333 35.777333 180.902349 
 127.208444 35.777333 185.125377 
 127.208556 35.777333 189.331161 
 127.208667 35.777333 193.502147 
 127.207556 35.777445 151.723191 
 127.207667 35.777445 155.736239 
 127.207778 35.777445 159.803550 
 127.207889 35.777445 163.920286 
 127.208111 35.777445 172.243980 
 127.208333 35.777445 180.616794 
 127.208444 35.777445 184.791877 
 127.208556 35.777445 188.948999 
 127.208667 35.777445 193.070780 
 127.207556 35.777556 151.733265 
 127.207667 35.777556 155.705087 
 127.207778 35.777556 159.729955 
 127.207889 35.777556 163.803036 
 127.208111 35.777556 172.036242 
 127.208333 35.777556 180.314855 
 127.208444 35.777556 184.441695 
 127.208556 35.777556 188.549890 
 127.208667 35.777556 192.622240 
 127.207667 35.777556 155.705087 
 127.207778 35.777556 159.729955 
 127.207889 35.777556 163.803036 
 127.208000 35.777556 167.906738 
 127.208222 35.777556 176.173847 
 127.208444 35.777556 184.441695 
 127.208556 35.777556 188.549890 
 127.208667 35.777556 192.622240 
 127.208778 35.777556 196.654578 
 127.207667 35.777667 155.660082 
 127.207778 35.777667 159.641908 
 127.207889 35.777667 163.670757 
 127.208000 35.777667 167.729187 
 127.208222 35.777667 175.902836 
 127.208444 35.777667 184.073997 
 127.208556 35.777667 188.132862 
 127.208667 35.777667 192.155411 
 127.208778 35.777667 196.137506 
 127.207667 35.777778 155.601587 
 127.207778 35.777778 159.539944 
 127.207889 35.777778 163.524161 
 127.208000 35.777778 167.536947 
 127.208222 35.777778 175.616484 
 127.208444 35.777778 183.690438 
 127.208556 35.777778 187.699767 
 127.208667 35.777778 191.672347 
 127.208778 35.777778 195.604067 
 127.207778 35.777778 159.539944 
 127.207889 35.777778 163.524161 
 127.208000 35.777778 167.536947 
 127.208111 35.777778 171.573514 
 127.208333 35.777778 179.661200 
 127.208556 35.777778 187.699767 
 127.208667 35.777778 191.672347 
 127.208778 35.777778 195.604067 
 127.208889 35.777778 199.478691 
 127.207778 35.777889 159.423967 
 127.207889 35.777889 163.363023 
 127.208000 35.777889 167.329662 
 127.208111 35.777889 171.319113 
 127.208333 35.777889 179.310182 
 127.208556 35.777889 187.249560 
 127.208667 35.777889 191.171859 
 127.208778 35.777889 195.052928 
 127.208889 35.777889 198.876721 
 127.207778 35.778000 159.294647 
 127.207889 35.778000 163.188195 
 127.208000 35.778000 167.108370 
 127.208111 35.778000 171.050418 
 127.208333 35.778000 178.944396 
 127.208556 35.778000 186.784252 
 127.208667 35.778000 190.656159 
 127.208778 35.778000 194.486506 
 127.208889 35.778000 198.259433 
 127.207889 35.778000 163.188195 
 127.208000 35.778000 167.108370 
 127.208111 35.778000 171.050418 
 127.208222 35.778000 174.997298 
 127.208444 35.778000 182.874840 
 127.208667 35.778000 190.656159 
 127.208778 35.778000 194.486506 
 127.208889 35.778000 198.259433 
 127.209000 35.778000 201.971287 
 127.207889 35.778111 162.999396 
 127.208000 35.778111 166.872656 
 127.208111 35.778111 170.766879 
 127.208222 35.778111 174.665195 
 127.208444 35.778111 182.443642 
 127.208667 35.778111 190.123990 
 127.208778 35.778111 193.903396 
 127.208889 35.778111 197.625278 
 127.209000 35.778111 201.286013 
 127.207889 35.778222 162.797255 
 127.208000 35.778222 166.623256 
 127.208111 35.778222 170.469341 
 127.208222 35.778222 174.318812 
 127.208444 35.778222 181.997704 
 127.208667 35.778222 189.576765 
 127.208778 35.778222 193.305129 
 127.208889 35.778222 196.975903 
 127.209000 35.778222 200.585495 
 127.208000 35.778222 166.623256 
 127.208111 35.778222 170.469341 
 127.208222 35.778222 174.318812 
 127.208333 35.778222 178.167103 
 127.208556 35.778222 185.806292 
 127.208778 35.778222 193.305129 
 127.208889 35.778222 196.975903 
 127.209000 35.778222 200.585495 
 127.209111 35.778222 204.119239 
 127.208000 35.778333 166.361020 
 127.208111 35.778333 170.158765 
 127.208222 35.778333 173.959223 
 127.208333 35.778333 177.757854 
 127.208556 35.778333 185.296357 
 127.208778 35.778333 192.693359 
 127.208889 35.778333 196.313079 
 127.209000 35.778333 199.871621 
 127.209111 35.778333 203.354509 
 127.208000 35.778445 166.085454 
 127.208111 35.778445 169.834518 
 127.208222 35.778445 173.585655 
 127.208333 35.778445 177.334350 
 127.208556 35.778445 184.771722 
 127.208778 35.778445 192.066590 
 127.208889 35.778445 195.635164 
 127.209000 35.778445 199.142603 
 127.209111 35.778445 202.574621 
 127.208111 35.778556 169.498167 
 127.208222 35.778556 173.199872 
 127.208333 35.778556 176.898557 
 127.208444 35.778556 180.578265 
 127.208667 35.778556 187.852506 
 127.208889 35.778556 194.945144 
 127.209000 35.778556 198.401631 
 127.209111 35.778556 201.782968 
 127.209222 35.778556 205.086129 
 127.208111 35.778667 169.149028 
 127.208222 35.778667 172.801051 
 127.208333 35.778667 176.449508 
 127.208444 35.778667 180.078630 
 127.208667 35.778667 187.250907 
 127.208889 35.778667 194.241323 
 127.209000 35.778667 197.646862 
 127.209111 35.778667 200.977562 
 127.209222 35.778667 204.230428 
 127.208111 35.778778 168.788794 
 127.208222 35.778778 172.391082 
 127.208333 35.778778 175.989296 
 127.208444 35.778778 179.567851 
 127.208667 35.778778 186.638317 
 127.208889 35.778778 193.526814 
 127.209000 35.778778 196.881614 
 127.209111 35.778778 200.161924 
 127.209222 35.778778 203.364777 
 127.208222 35.778778 172.391082 
 127.208333 35.778778 175.989296 
 127.208444 35.778778 179.567851 
 127.208556 35.778778 183.122575 
 127.208778 35.778778 190.111237 
 127.209000 35.778778 196.881614 
 127.209111 35.778778 200.161924 
 127.209222 35.778778 203.364777 
 127.209333 35.778778 206.477428 
 127.208222 35.778889 171.969095 
 127.208333 35.778889 175.516904 
 127.208444 35.778889 179.044770 
 127.208556 35.778889 182.548550 
 127.208778 35.778889 189.435170 
 127.209000 35.778889 196.103999 
 127.209111 35.778889 199.334019 
 127.209222 35.778889 202.486999 
 127.209333 35.778889 205.550379 
 127.208222 35.779000 171.537096 
 127.208333 35.779000 175.034544 
 127.208444 35.779000 178.511799 
 127.208556 35.779000 181.964751 
 127.208778 35.779000 188.749673 
 127.209000 35.779000 195.317449 
 127.209111 35.779000 198.497481 
 127.209222 35.779000 201.600927 
 127.209333 35.779000 204.615409 
 127.208333 35.779000 175.034544 
 127.208444 35.779000 178.511799 
 127.208556 35.779000 181.964751 
 127.208667 35.779000 185.378633 
 127.208889 35.779000 192.063735 
 127.209111 35.779000 198.497481 
 127.209222 35.779000 201.600927 
 127.209333 35.779000 204.615409 
 127.209444 35.779000 207.538533 
 127.208333 35.779111 174.541160 
 127.208444 35.779111 177.967739 
 127.208556 35.779111 181.369833 
 127.208667 35.779111 184.732870 
 127.208889 35.779111 191.316611 
 127.209111 35.779111 197.650237 
 127.209222 35.779111 200.704344 
 127.209333 35.779111 203.670162 
 127.209444 35.779111 206.545322 
 127.208333 35.779222 174.038197 
 127.208444 35.779222 177.414150 
 127.208556 35.779222 180.765475 
 127.208667 35.779222 184.077791 
 127.208889 35.779222 190.560531 
 127.209111 35.779222 196.794545 
 127.209222 35.779222 199.799621 
 127.209333 35.779222 202.717117 
 127.209444 35.779222 205.544692 
 127.208444 35.779222 177.414150 
 127.208556 35.779222 180.765475 
 127.208667 35.779222 184.077791 
 127.208778 35.779222 187.347393 
 127.209000 35.779222 193.713900 
 127.209222 35.779222 199.799621 
 127.209333 35.779222 202.717117 
 127.209444 35.779222 205.544692 
 127.209556 35.779222 208.271410 
 127.208444 35.779333 176.852676 
 127.208556 35.779333 180.153434 
 127.208667 35.779333 183.415269 
 127.208778 35.779333 186.634511 
 127.209000 35.779333 192.901262 
 127.209222 35.779333 198.889197 
 127.209333 35.779333 201.758824 
 127.209444 35.779333 204.539299 
 127.209556 35.779333 207.219857 
 127.208444 35.779444 176.282068 
 127.208556 35.779444 179.532318 
 127.208667 35.779444 182.743768 
 127.208778 35.779444 185.912780 
 127.209000 35.779444 192.080150 
 127.209222 35.779444 197.970819 
 127.209333 35.779444 200.792891 
 127.209444 35.779444 203.526613 
 127.209556 35.779444 206.161393 
 127.208556 35.779444 179.532318 
 127.208667 35.779444 182.743768 
 127.208778 35.779444 185.912780 
 127.208889 35.779444 189.025986 
 127.209111 35.779444 195.062689 
 127.209333 35.779444 200.792891 
 127.209444 35.779444 203.526613 
 127.209556 35.779444 206.161393 
 127.209667 35.779444 208.695462 
 127.208556 35.779555 178.904988 
 127.208667 35.779555 182.066349 
 127.208778 35.779555 185.185465 
 127.208889 35.779555 188.249158 
 127.209111 35.779555 194.188269 
 127.209333 35.779555 199.823554 
 127.209444 35.779555 202.511058 
 127.209556 35.779555 205.100622 
 127.209667 35.779555 207.590499 
 127.208556 35.779667 178.270028 
 127.208667 35.779667 181.381453 
 127.208778 35.779667 184.450862 
 127.208889 35.779667 187.465267 
 127.209111 35.779667 193.307344 
 127.209333 35.779667 198.848410 
 127.209444 35.779667 201.490096 
 127.209556 35.779667 204.034875 
 127.209667 35.779667 206.481021 
 127.208667 35.779667 181.381453 
 127.208778 35.779667 184.450862 
 127.208889 35.779667 187.465267 
 127.209000 35.779667 190.421499 
 127.209222 35.779667 196.120080 
 127.209444 35.779667 201.490096 
 127.209556 35.779667 204.034875 
 127.209667 35.779667 206.481021 
 127.209778 35.779667 208.819407 
 127.208667 35.779778 180.692216 
 127.208778 35.779778 183.712306 
 127.208889 35.779778 186.677846 
 127.209000 35.779778 189.585698 
 127.209222 35.779778 195.189559 
 127.209444 35.779778 200.468200 
 127.209556 35.779778 202.968803 
 127.209667 35.779778 205.371855 
 127.209778 35.779778 207.668377 
 127.208667 35.779889 179.997065 
 127.208778 35.779889 182.968082 
 127.208889 35.779889 185.885037 
 127.209000 35.779889 188.744826 
 127.209222 35.779889 194.254701 
 127.209444 35.779889 199.442833 
 127.209556 35.779889 201.899739 
 127.209667 35.779889 204.260205 
 127.209778 35.779889 206.515400 
 127.208667 35.780000 179.297992 
 127.208778 35.780000 182.220294 
 127.208889 35.780000 185.089057 
 127.209000 35.780000 187.901209 
 127.209222 35.780000 193.318048 
 127.209444 35.780000 198.416741 
 127.209556 35.780000 200.830529 
 127.209667 35.780000 203.149014 
 127.209778 35.780000 205.363511 
 127.208778 35.780000 182.220294 
 127.208889 35.780000 185.089057 
 127.209000 35.780000 187.901209 
 127.209111 35.780000 190.645084 
 127.209333 35.780000 195.909322 
 127.209556 35.780000 200.830529 
 127.209667 35.780000 203.149014 
 127.209778 35.780000 205.363511 
 127.209889 35.780000 207.472854 
 127.208778 35.780111 181.471086 
 127.208889 35.780111 184.292156 
 127.209000 35.780111 187.057203 
 127.209111 35.780111 189.754741 
 127.209333 35.780111 194.928857 
 127.209556 35.780111 199.764028 
 127.209667 35.780111 202.041228 
 127.209778 35.780111 204.215745 
 127.209889 35.780111 206.286421 
 127.208778 35.780222 180.718736 
 127.208889 35.780222 183.492476 
 127.209000 35.780222 186.210815 
 127.209111 35.780222 188.862443 
 127.209333 35.780222 193.947389 
 127.209556 35.780222 198.697591 
 127.209667 35.780222 200.934081 
 127.209778 35.780222 203.069217 
 127.209889 35.780222 205.101850 
 127.208889 35.780222 183.492476 
 127.209000 35.780222 186.210815 
 127.209111 35.780222 188.862443 
 127.209222 35.780222 191.444781 
 127.209444 35.780222 196.368147 
 127.209667 35.780222 200.934081 
 127.209778 35.780222 203.069217 
 127.209889 35.780222 205.101850 
 127.210000 35.780222 207.024709 
 127.208889 35.780333 182.693659 
 127.209000 35.780333 185.365871 
 127.209111 35.780333 187.972199 
 127.209222 35.780333 190.510094 
 127.209444 35.780333 195.347656 
 127.209667 35.780333 199.832429 
 127.209778 35.780333 201.928937 
 127.209889 35.780333 203.924298 
 127.210000 35.780333 205.811361 
 127.208889 35.780444 181.893858 
 127.209000 35.780444 184.520390 
 127.209111 35.780444 187.081897 
 127.209222 35.780444 189.575856 
 127.209444 35.780444 194.328717 
 127.209667 35.780444 198.733537 
 127.209778 35.780444 200.792057 
 127.209889 35.780444 202.750806 
 127.210000 35.780444 204.602751 
 127.209000 35.780444 184.520390 
 127.209111 35.780444 187.081897 
 127.209222 35.780444 189.575856 
 127.209333 35.780444 191.992155 
 127.209556 35.780444 196.576381 
 127.209778 35.780444 200.792057 
 127.209889 35.780444 202.750806 
 127.210000 35.780444 204.602751 
 127.210111 35.780444 206.347230 
 127.209000 35.780555 183.678211 
 127.209111 35.780555 186.195552 
 127.209222 35.780555 188.646258 
 127.209333 35.780555 191.020377 
 127.209556 35.780555 195.523674 
 127.209778 35.780555 199.663560 
 127.209889 35.780555 201.586499 
 127.210000 35.780555 203.404141 
 127.210111 35.780555 205.115823 
 127.209000 35.780667 182.837376 
 127.209111 35.780667 185.311077 
 127.209222 35.780667 187.719086 
 127.209333 35.780667 190.051608 
 127.209556 35.780667 194.475217 
 127.209778 35.780667 198.540643 
 127.209889 35.780667 200.428469 
 127.210000 35.780667 202.212520 
 127.210111 35.780667 203.892129 
 127.209111 35.780667 185.311077 
 127.209222 35.780667 187.719086 
 127.209333 35.780667 190.051608 
 127.209444 35.780667 192.306609 
 127.209667 35.780667 196.555852 
 127.209889 35.780667 200.428469 
 127.210000 35.780667 202.212520 
 127.210111 35.780667 203.892129 
 127.210222 35.780667 205.461591 
 127.209111 35.780778 184.430972 
 127.209222 35.780778 186.796935 
 127.209333 35.780778 189.088536 
 127.209444 35.780778 191.303760 
 127.209667 35.780778 195.477319 
 127.209889 35.780778 199.279826 
 127.210000 35.780778 201.031071 
 127.210111 35.780778 202.679406 
 127.210222 35.780778 204.219213 
 127.209111 35.780889 183.557708 
 127.209222 35.780889 185.882370 
 127.209333 35.780889 188.133813 
 127.209444 35.780889 190.310046 
 127.209667 35.780889 194.409544 
 127.209889 35.780889 198.143617 
 127.210000 35.780889 199.862910 
 127.210111 35.780889 201.480831 
 127.210222 35.780889 202.991848 
 127.209222 35.780889 185.882370 
 127.209333 35.780889 188.133813 
 127.209444 35.780889 190.310046 
 127.209556 35.780889 192.402475 
 127.209778 35.780889 196.323629 
 127.210000 35.780889 199.862910 
 127.210111 35.780889 201.480831 
 127.210222 35.780889 202.991848 
 127.210333 35.780889 204.395705 
 127.209222 35.781000 184.973238 
 127.209333 35.781000 187.185171 
 127.209444 35.781000 189.323082 
 127.209556 35.781000 191.378512 
 127.209778 35.781000 195.229794 
 127.210000 35.781000 198.705126 
 127.210111 35.781000 200.293401 
 127.210222 35.781000 201.776405 
 127.210333 35.781000 203.153864 
 127.209222 35.781111 184.073660 
 127.209333 35.781111 186.246883 
 127.209444 35.781111 188.347291 
 127.209556 35.781111 190.366557 
 127.209778 35.781111 194.149674 
 127.210000 35.781111 197.562802 
 127.210111 35.781111 199.122313 
 127.210222 35.781111 200.578185 
 127.210333 35.781111 201.930130 
 127.209333 35.781111 186.246883 
 127.209444 35.781111 188.347291 
 127.209556 35.781111 190.366557 
 127.209667 35.781111 192.303148 
 127.209889 35.781111 195.905025 
 127.210111 35.781111 199.122313 
 127.210222 35.781111 200.578185 
 127.210333 35.781111 201.930130 
 127.210444 35.781111 203.173818 
 127.209333 35.781222 185.316738 
 127.209444 35.781222 187.380350 
 127.209556 35.781222 189.364178 
 127.209667 35.781222 191.266698 
 127.209889 35.781222 194.804872 
 127.210111 35.781222 197.964651 
 127.210222 35.781222 199.394189 
 127.210333 35.781222 200.721422 
 127.210444 35.781222 201.942074 
 127.209333 35.781333 184.398946 
 127.209444 35.781333 186.426612 
 127.209556 35.781333 188.375866 
 127.209667 35.781333 190.245190 
 127.209889 35.781333 193.721436 
 127.210111 35.781333 196.825498 
 127.210222 35.781333 198.229601 
 127.210333 35.781333 199.533017 
 127.210444 35.781333 200.731521 
 127.209333 35.781444 183.491363 
 127.209444 35.781444 185.483826 
 127.209556 35.781444 187.399263 
 127.209667 35.781444 189.236167 
 127.209889 35.781444 192.652072 
 127.210111 35.781444 195.702037 
 127.210222 35.781444 197.081522 
 127.210333 35.781444 198.361940 
 127.210444 35.781444 199.539115 
 127.209444 35.781444 185.483826 
 127.209556 35.781444 187.399263 
 127.209667 35.781444 189.236167 
 127.209778 35.781444 190.987473 
 127.210000 35.781444 194.223833 
 127.210222 35.781444 197.081522 
 127.210333 35.781444 198.361940 
 127.210444 35.781444 199.539115 
 127.210556 35.781444 200.613051 
 127.209444 35.781555 184.556256 
 127.209556 35.781555 186.438767 
 127.209667 35.781555 188.244149 
 127.209778 35.781555 189.965440 
 127.210000 35.781555 193.146366 
 127.210222 35.781555 195.954997 
 127.210333 35.781555 197.213323 
 127.210444 35.781555 198.370064 
 127.210556 35.781555 199.425196 
 127.209444 35.781667 183.641733 
 127.209556 35.781667 185.492107 
 127.209667 35.781667 187.266770 
 127.209778 35.781667 188.958860 
 127.210000 35.781667 192.086003 
 127.210222 35.781667 194.847242 
 127.210333 35.781667 196.084309 
 127.210444 35.781667 197.221447 
 127.210556 35.781667 198.258599 
 127.209556 35.781667 185.492107 
 127.209667 35.781667 187.266770 
 127.209778 35.781667 188.958860 
 127.209889 35.781667 190.567260 
 127.210111 35.781667 193.514343 
 127.210333 35.781667 196.084309 
 127.210444 35.781667 197.221447 
 127.210556 35.781667 198.258599 
 127.210667 35.781667 199.192614 
 127.209556 35.781778 184.561981 
 127.209667 35.781778 186.306796 
 127.209778 35.781778 187.970560 
 127.209889 35.781778 189.552154 
 127.210111 35.781778 192.450395 
 127.210333 35.781778 194.977984 
 127.210444 35.781778 196.096389 
 127.210556 35.781778 197.116421 
 127.210667 35.781778 198.034946 
 127.209556 35.781889 183.650969 
 127.209667 35.781889 185.366865 
 127.209778 35.781889 187.003236 
 127.209889 35.781889 188.558958 
 127.210111 35.781889 191.410217 
 127.210333 35.781889 193.897266 
 127.210444 35.781889 194.997838 
 127.210556 35.781889 196.001639 
 127.210667 35.781889 196.905546 
 127.209667 35.781889 185.366865 
 127.209778 35.781889 187.003236 
 127.209889 35.781889 188.558958 
 127.210000 35.781889 190.028209 
 127.210222 35.781889 192.700049 
 127.210444 35.781889 194.997838 
 127.210556 35.781889 196.001639 
 127.210667 35.781889 196.905546 
 127.210778 35.781889 197.709718 
 127.209667 35.782000 184.444767 
 127.209778 35.782000 186.054593 
 127.209889 35.782000 187.585296 
 127.210000 35.782000 189.031123 
 127.210222 35.782000 191.660898 
 127.210444 35.782000 193.923079 
 127.210556 35.782000 194.911484 
 127.210667 35.782000 195.801595 
 127.210778 35.782000 196.593525 
 127.209667 35.782111 183.544687 
 127.209778 35.782111 185.128914 
 127.209889 35.782111 186.635545 
 127.210000 35.782111 188.058890 
 127.210222 35.782111 190.648464 
 127.210444 35.782111 192.876856 
 127.210556 35.782111 193.850751 
 127.210667 35.782111 194.727934 
 127.210778 35.782111 195.508472 
 127.209778 35.782111 185.128914 
 127.209889 35.782111 186.635545 
 127.210000 35.782111 188.058890 
 127.210111 35.782111 189.398143 
 127.210333 35.782111 191.809361 
 127.210556 35.782111 193.850751 
 127.210667 35.782111 194.727934 
 127.210778 35.782111 195.508472 
 127.210889 35.782111 196.190110 
 127.209778 35.782222 184.224028 
 127.209889 35.782222 185.707457 
 127.210000 35.782222 187.109189 
 127.210111 35.782222 188.428402 
 127.210333 35.782222 190.804347 
 127.210556 35.782222 192.816825 
 127.210667 35.782222 193.681902 
 127.210778 35.782222 194.451854 
 127.210889 35.782222 195.124408 
 127.209778 35.782333 183.344044 
 127.209889 35.782333 184.805227 
 127.210000 35.782333 186.186296 
 127.210111 35.782333 187.486410 
 127.210333 35.782333 189.828929 
 127.210556 35.782333 191.814277 
 127.210667 35.782333 192.668110 
 127.210778 35.782333 193.428316 
 127.210889 35.782333 194.092600 
 127.209889 35.782333 184.805227 
 127.210000 35.782333 186.186296 
 127.210111 35.782333 187.486410 
 127.210222 35.782333 188.700803 
 127.210444 35.782333 190.866845 
 127.210667 35.782333 192.668110 
 127.210778 35.782333 193.428316 
 127.210889 35.782333 194.092600 
 127.211000 35.782333 194.661151 
 127.209889 35.782444 183.926745 
 127.210000 35.782444 185.288033 
 127.210111 35.782444 186.569925 
 127.210222 35.782444 187.767691 
 127.210444 35.782444 189.905179 
 127.210667 35.782444 191.684067 
 127.210778 35.782444 192.435330 
 127.210889 35.782444 193.092124 
 127.211000 35.782444 193.654584 
 127.209889 35.782556 183.074566 
 127.210000 35.782556 184.416994 
 127.210111 35.782556 185.681580 
 127.210222 35.782556 186.863621 
 127.210444 35.782556 188.974321 
 127.210667 35.782556 190.732528 
 127.210778 35.782556 191.475662 
 127.210889 35.782556 192.125758 
 127.211000 35.782556 192.682891 
 127.210000 35.782556 184.416994 
 127.210111 35.782556 185.681580 
 127.210222 35.782556 186.863621 
 127.210333 35.782556 187.962508 
 127.210556 35.782556 189.898705 
 127.210778 35.782556 191.475662 
 127.210889 35.782556 192.125758 
 127.211000 35.782556 192.682891 
 127.211111 35.782556 193.145477 
 127.210000 35.782667 183.575573 
 127.210111 35.782667 184.823796 
 127.210222 35.782667 185.991040 
 127.210333 35.782667 187.076665 
 127.210556 35.782667 188.990917 
 127.210778 35.782667 190.551831 
 127.210889 35.782667 191.196023 
 127.211000 35.782667 191.748593 
 127.211111 35.782667 192.207911 
 127.210000 35.782778 182.761824 
 127.210111 35.782778 183.994572 
 127.210222 35.782778 185.147896 
 127.210333 35.782778 186.221124 
 127.210556 35.782778 188.115114 
 127.210778 35.782778 189.661590 
 127.210889 35.782778 190.300646 
 127.211000 35.782778 190.849398 
 127.211111 35.782778 191.306161 
 127.210000 35.782889 181.979475 
 127.210111 35.782889 183.197688 
 127.210222 35.782889 184.338016 
 127.210333 35.782889 185.399754 
 127.210556 35.782889 187.275228 
 127.210778 35.782889 188.808909 
 127.210889 35.782889 189.443609 
 127.211000 35.782889 189.989289 
 127.211111 35.782889 190.444212 
 127.210111 35.782889 183.197688 
 127.210222 35.782889 184.338016 
 127.210333 35.782889 185.399754 
 127.210444 35.782889 186.378985 
 127.210667 35.782889 188.085296 
 127.210889 35.782889 189.443609 
 127.211000 35.782889 189.989289 
 127.211111 35.782889 190.444212 
 127.211222 35.782889 190.808422 
 127.210111 35.783000 182.431315 
 127.210222 35.783000 183.559526 
 127.210333 35.783000 184.610637 
 127.210444 35.783000 185.580727 
 127.210667 35.783000 187.273053 
 127.210889 35.783000 188.622843 
 127.211000 35.783000 189.166182 
 127.211111 35.783000 189.619964 
 127.211222 35.783000 189.984164 
 127.210111 35.783111 181.698979 
 127.210222 35.783111 182.815989 
 127.210333 35.783111 183.857371 
 127.210444 35.783111 184.819193 
 127.210667 35.783111 186.499205 
 127.210889 35.783111 187.842026 
 127.211000 35.783111 188.383752 
 127.211111 35.783111 188.837088 
 127.211222 35.783111 189.201937 
 127.210222 35.783111 182.815989 
 127.210333 35.783111 183.857371 
 127.210444 35.783111 184.819193 
 127.210556 35.783111 185.700884 
 127.210778 35.783111 187.213767 
 127.211000 35.783111 188.383752 
 127.211111 35.783111 188.837088 
 127.211222 35.783111 189.201937 
 127.211333 35.783111 189.477121 
 127.210222 35.783222 182.105718 
 127.210333 35.783222 183.138230 
 127.210444 35.783222 184.092625 
 127.210556 35.783222 184.968284 
 127.210778 35.783222 186.473142 
 127.211000 35.783222 187.640132 
 127.211111 35.783222 188.093703 
 127.211222 35.783222 188.459852 
 127.211333 35.783222 188.737321 
 127.210222 35.783333 181.431997 
 127.210333 35.783333 182.456527 
 127.210444 35.783333 183.404355 
 127.210556 35.783333 184.274817 
 127.210778 35.783333 185.773231 
 127.211000 35.783333 186.938675 
 127.211111 35.783333 187.393153 
 127.211222 35.783333 187.761236 
 127.211333 35.783333 188.041587 
 127.210333 35.783333 182.456527 
 127.210444 35.783333 183.404355 
 127.210556 35.783333 184.274817 
 127.210667 35.783333 185.064608 
 127.210889 35.783333 186.398038 
 127.211111 35.783333 187.393153 
 127.211222 35.783333 187.761236 
 127.211333 35.783333 188.041587 
 127.211444 35.783333 188.234069 
 127.210333 35.783444 181.810735 
 127.210444 35.783444 182.752828 
 127.210556 35.783444 183.618903 
 127.210667 35.783444 184.405617 
 127.210889 35.783444 185.736595 
 127.211111 35.783444 186.733787 
 127.211222 35.783444 187.104435 
 127.211333 35.783444 187.388262 
 127.211444 35.783444 187.585054 
 127.210333 35.783556 181.202856 
 127.210444 35.783556 182.140053 
 127.210556 35.783556 183.002553 
 127.210667 35.783556 183.786972 
 127.210889 35.783556 185.116973 
 127.211111 35.783556 186.117584 
 127.211222 35.783556 186.491413 
 127.211333 35.783556 186.779293 
 127.211444 35.783556 186.980934 
 127.210444 35.783556 182.140053 
 127.210556 35.783556 183.002553 
 127.210667 35.783556 183.786972 
 127.210778 35.783556 184.492698 
 127.211000 35.783556 185.659311 
 127.211222 35.783556 186.491413 
 127.211333 35.783556 186.779293 
 127.211444 35.783556 186.980934 
 127.211556 35.783556 187.095507 
 127.210444 35.783667 181.567743 
 127.210556 35.783667 182.427478 
 127.210667 35.783667 183.210379 
 127.210778 35.783667 183.915778 
 127.211000 35.783667 185.085064 
 127.211222 35.783667 185.923804 
 127.211333 35.783667 186.216295 
 127.211444 35.783667 186.423301 
 127.211556 35.783667 186.543904 
 127.210444 35.783778 181.034668 
 127.210556 35.783778 181.892427 
 127.210667 35.783778 182.674574 
 127.210778 35.783778 183.380380 
 127.211000 35.783778 184.553710 
 127.211222 35.783778 185.400320 
 127.211333 35.783778 185.697982 
 127.211444 35.783778 185.910877 
 127.211556 35.783778 186.037992 
 127.210556 35.783778 181.892427 
 127.210667 35.783778 182.674574 
 127.210778 35.783778 183.380380 
 127.210889 35.783778 184.006964 
 127.211111 35.783778 185.018336 
 127.211333 35.783778 185.697982 
 127.211444 35.783778 185.910877 
 127.211556 35.783778 186.037992 
 127.211667 35.783778 186.078747 
 127.210556 35.783889 181.399941 
 127.210667 35.783889 182.182089 
 127.210778 35.783889 182.889024 
 127.210889 35.783889 183.517800 
 127.211111 35.783889 184.536464 
 127.211333 35.783889 185.226760 
 127.211444 35.783889 185.446032 
 127.211556 35.783889 185.580106 
 127.211667 35.783889 185.628303 
 127.210556 35.784000 180.948998 
 127.210667 35.784000 181.731893 
 127.210778 35.784000 182.440673 
 127.210889 35.784000 183.072323 
 127.211111 35.784000 184.099540 
 127.211333 35.784000 184.801599 
 127.211444 35.784000 185.027747 
 127.211556 35.784000 185.169237 
 127.211667 35.784000 185.225293 
 127.210556 35.784111 180.541792 
 127.210667 35.784111 181.326168 
 127.210778 35.784111 182.037492 
 127.210889 35.784111 182.672677 
 127.211111 35.784111 183.709656 
 127.211333 35.784111 184.424524 
 127.211444 35.784111 184.658008 
 127.211556 35.784111 184.807333 
 127.211667 35.784111 184.871622 
 127.210667 35.784111 181.326168 
 127.210778 35.784111 182.037492 
 127.210889 35.784111 182.672677 
 127.211000 35.784111 183.230907 
 127.211222 35.784111 184.108180 
 127.211444 35.784111 184.658008 
 127.211556 35.784111 184.807333 
 127.211667 35.784111 184.871622 
 127.211778 35.784111 184.850275 
 127.210667 35.784222 180.964123 
 127.210778 35.784222 181.678687 
 127.210889 35.784222 182.318070 
 127.211000 35.784222 182.881387 
 127.211222 35.784222 183.771171 
 127.211444 35.784222 184.336062 
 127.211556 35.784222 184.493654 
 127.211667 35.784222 184.566566 
 127.211778 35.784222 184.554117 
 127.210667 35.784333 180.647072 
 127.210778 35.784333 181.365558 
 127.210889 35.784333 182.009782 
 127.211000 35.784333 182.578793 
 127.211222 35.784333 183.482185 
 127.211444 35.784333 184.063074 
 127.211556 35.784333 184.229338 
 127.211667 35.784333 184.311237 
 127.211778 35.784333 184.308005 
 127.210778 35.784333 181.365558 
 127.210889 35.784333 182.009782 
 127.211000 35.784333 182.578793 
 127.211111 35.784333 183.069890 
 127.211333 35.784333 183.813525 
 127.211556 35.784333 184.229338 
 127.211667 35.784333 184.311237 
 127.211778 35.784333 184.308005 
 127.211889 35.784333 184.218908 
 127.210778 35.784444 181.099056 
 127.210889 35.784444 181.748744 
 127.211000 35.784444 182.324033 
 127.211111 35.784444 182.822132 
 127.211333 35.784444 183.581620 
 127.211556 35.784444 184.015156 
 127.211667 35.784444 184.106372 
 127.211778 35.784444 184.112647 
 127.211889 35.784444 184.033134 
 127.210778 35.784556 180.878770 
 127.210889 35.784556 181.534549 
 127.211000 35.784556 182.116708 
 127.211111 35.784556 182.622362 
 127.211333 35.784556 183.398693 
 127.211556 35.784556 183.850778 
 127.211667 35.784556 183.951664 
 127.211778 35.784556 183.967754 
 127.211889 35.784556 183.898091 
 127.210889 35.784556 181.534549 
 127.211000 35.784556 182.116708 
 127.211111 35.784556 182.622362 
 127.211222 35.784556 183.050475 
 127.211444 35.784556 183.666026 
 127.211667 35.784556 183.951664 
 127.211778 35.784556 183.967754 
 127.211889 35.784556 183.898091 
 127.212000 35.784556 183.741789 
 127.210889 35.784667 181.368392 
 127.211000 35.784667 181.957975 
 127.211111 35.784667 182.471699 
 127.211222 35.784667 182.908452 
 127.211444 35.784667 183.542609 
 127.211667 35.784667 183.848006 
 127.211778 35.784667 183.874173 
 127.211889 35.784667 183.814578 
 127.212000 35.784667 183.668255 
 127.210889 35.784778 181.250127 
 127.211000 35.784778 181.847703 
 127.211111 35.784778 182.370024 
 127.211222 35.784778 182.815907 
 127.211444 35.784778 183.469527 
 127.211667 35.784778 183.795374 
 127.211778 35.784778 183.831900 
 127.211889 35.784778 183.782613 
 127.212000 35.784778 183.646466 
 127.211000 35.784778 181.847703 
 127.211111 35.784778 182.370024 
 127.211222 35.784778 182.815907 
 127.211333 35.784778 183.182790 
 127.211556 35.784778 183.674219 
 127.211778 35.784778 183.831900 
 127.211889 35.784778 183.782613 
 127.212000 35.784778 183.646466 
 127.212111 35.784778 183.422863 
 127.211000 35.784889 181.786650 
 127.211111 35.784889 182.318054 
 127.211222 35.784889 182.773510 
 127.211333 35.784889 183.150352 
 127.211556 35.784889 183.662520 
 127.211778 35.784889 183.841365 
 127.211889 35.784889 183.802578 
 127.212000 35.784889 183.676757 
 127.212111 35.784889 183.463195 
 127.211000 35.785000 181.774954 
 127.211111 35.785000 182.315945 
 127.211222 35.785000 182.781438 
 127.211333 35.785000 183.168661 
 127.211556 35.785000 183.702289 
 127.211778 35.785000 183.902854 
 127.211889 35.785000 183.874781 
 127.212000 35.785000 183.759459 
 127.212111 35.785000 183.556069 
 127.211111 35.785000 182.315945 
 127.211222 35.785000 182.781438 
 127.211333 35.785000 183.168661 
 127.211444 35.785000 183.476313 
 127.211667 35.785000 183.844886 
 127.211889 35.785000 183.874781 
 127.212000 35.785000 183.759459 
 127.212111 35.785000 183.556069 
 127.212222 35.785000 183.263458 
 127.211111 35.785111 182.364131 
 127.211222 35.785111 182.840095 
 127.211333 35.785111 183.238091 
 127.211444 35.785111 183.556741 
 127.211667 35.785111 183.947572 
 127.211889 35.785111 183.999439 
 127.212000 35.785111 183.894760 
 127.212111 35.785111 183.701644 
 127.212222 35.785111 183.418863 
 127.211111 35.785222 182.462668 
 127.211222 35.785222 182.949502 
 127.211333 35.785222 183.358630 
 127.211444 35.785222 183.688596 
 127.211667 35.785222 184.102194 
 127.211889 35.785222 184.176378 
 127.212000 35.785222 184.082453 
 127.212111 35.785222 183.899685 
 127.212222 35.785222 183.626768 
 127.211111 35.785333 182.612131 
 127.211222 35.785333 183.110259 
 127.211333 35.785333 183.530901 
 127.211444 35.785333 183.872524 
 127.211667 35.785333 184.309449 
 127.211889 35.785333 184.406347 
 127.212000 35.785333 184.323313 
 127.212111 35.785333 184.150990 
 127.212222 35.785333 183.887995 
 127.211222 35.785333 183.110259 
 127.211333 35.785333 183.530901 
 127.211444 35.785333 183.872524 
 127.211556 35.785333 184.132713 
 127.211778 35.785333 184.401245 
 127.212000 35.785333 184.323313 
 127.212111 35.785333 184.150990 
 127.212222 35.785333 183.887995 
 127.212333 35.785333 183.533810 
 127.211222 35.785444 183.322001 
 127.211333 35.785444 183.754485 
 127.211444 35.785444 184.108054 
 127.211556 35.785444 184.380188 
 127.211778 35.785444 184.672209 
 127.212000 35.785444 184.616611 
 127.212111 35.785444 184.454782 
 127.212222 35.785444 184.201722 
 127.212333 35.785444 183.856808 
 127.211222 35.785556 183.585609 
 127.211333 35.785556 184.030293 
 127.211444 35.785556 184.396124 
 127.211556 35.785556 184.680476 
 127.211778 35.785556 184.996416 
 127.212000 35.785556 184.963419 
 127.212111 35.785556 184.812160 
 127.212222 35.785556 184.569072 
 127.212333 35.785556 184.233429 
 127.211333 35.785556 184.030293 
 127.211444 35.785556 184.396124 
 127.211556 35.785556 184.680476 
 127.211667 35.785556 184.881121 
 127.211889 35.785556 185.024380 
 127.212111 35.785556 184.812160 
 127.212222 35.785556 184.569072 
 127.212333 35.785556 184.233429 
 127.212444 35.785556 183.803790 
 127.211333 35.785667 184.357482 
 127.211444 35.785667 184.735835 
 127.211556 35.785667 185.032627 
 127.211667 35.785667 185.245523 
 127.211889 35.785667 185.412381 
 127.212111 35.785667 185.221917 
 127.212222 35.785667 184.988793 
 127.212333 35.785667 184.662380 
 127.212444 35.785667 184.241167 
 127.211333 35.785778 184.737254 
 127.211444 35.785778 185.128419 
 127.211556 35.785778 185.437899 
 127.211667 35.785778 185.663257 
 127.211889 35.785778 185.854014 
 127.212111 35.785778 185.685454 
 127.212222 35.785778 185.462312 
 127.212333 35.785778 185.145109 
 127.212444 35.785778 184.732268 
 127.211444 35.785778 185.128419 
 127.211556 35.785778 185.437899 
 127.211667 35.785778 185.663257 
 127.211778 35.785778 185.802697 
 127.212000 35.785778 185.815463 
 127.212222 35.785778 185.462312 
 127.212333 35.785778 185.145109 
 127.212444 35.785778 184.732268 
 127.212556 35.785778 184.223563 
 127.211444 35.785889 185.572551 
 127.211556 35.785889 185.894914 
 127.211667 35.785889 186.132887 
 127.211778 35.785889 186.284602 
 127.212000 35.785889 186.320483 
 127.212222 35.785889 185.987949 
 127.212333 35.785889 185.679899 
 127.212444 35.785889 185.275339 
 127.212556 35.785889 184.773955 
 127.211444 35.786000 186.069755 
 127.211556 35.786000 186.405225 
 127.211667 35.786000 186.655999 
 127.211778 35.786000 186.820136 
 127.212000 35.786000 186.879314 
 127.212222 35.786000 186.567431 
 127.212333 35.786000 186.268498 
 127.212444 35.786000 185.872151 
 127.212556 35.786000 185.377988 
 127.211556 35.786000 186.405225 
 127.211667 35.786000 186.655999 
 127.211778 35.786000 186.820136 
 127.211889 35.786000 186.895204 
 127.212111 35.786000 186.770661 
 127.212333 35.786000 186.268498 
 127.212444 35.786000 185.872151 
 127.212556 35.786000 185.377988 
 127.212667 35.786000 184.784436 
 127.211556 35.786111 186.968038 
 127.211667 35.786111 187.231765 
 127.211778 35.786111 187.408439 
 127.211889 35.786111 187.495515 
 127.212111 35.786111 187.393084 
 127.212333 35.786111 186.909910 
 127.212444 35.786111 186.521687 
 127.212556 35.786111 186.034626 
 127.212667 35.786111 185.447096 
 127.211556 35.786222 187.582166 
 127.211667 35.786222 187.858964 
 127.211778 35.786222 188.048256 
 127.211889 35.786222 188.147388 
 127.212111 35.786222 188.067063 
 127.212333 35.786222 187.602745 
 127.212444 35.786222 187.222537 
 127.212556 35.786222 186.742442 
 127.212667 35.786222 186.160772 
 127.211667 35.786222 187.858964 
 127.211778 35.786222 188.048256 
 127.211889 35.786222 188.147388 
 127.212000 35.786222 188.154329 
 127.212222 35.786222 187.883642 
 127.212444 35.786222 187.222537 
 127.212556 35.786222 186.742442 
 127.212667 35.786222 186.160772 
 127.212778 35.786222 185.477746 
 127.211667 35.786333 188.539626 
 127.211778 35.786333 188.741651 
 127.211889 35.786333 188.852917 
 127.212000 35.786333 188.871322 
 127.212222 35.786333 188.621182 
 127.212444 35.786333 187.976925 
 127.212556 35.786333 187.503680 
 127.212667 35.786333 186.927724 
 127.212778 35.786333 186.249210 
 127.211667 35.786444 189.271251 
 127.211778 35.786444 189.486069 
 127.211889 35.786444 189.609495 
 127.212000 35.786444 189.639360 
 127.212222 35.786444 189.409666 
 127.212444 35.786444 188.782043 
 127.212556 35.786444 188.315502 
 127.212667 35.786444 187.745094 
 127.212778 35.786444 187.070901 
 127.211667 35.786556 190.056164 
 127.211778 35.786556 190.283869 
 127.211889 35.786556 190.419515 
 127.212000 35.786556 190.460865 
 127.212222 35.786556 190.251570 
 127.212444 35.786556 189.640415 
 127.212556 35.786556 189.180453 
 127.212667 35.786556 188.615440 
 127.212778 35.786556 187.945393 
 127.211778 35.786556 190.283869 
 127.211889 35.786556 190.419515 
 127.212000 35.786556 190.460865 
 127.212111 35.786556 190.405598 
 127.212333 35.786556 189.997181 
 127.212556 35.786556 189.180453 
 127.212667 35.786556 188.615440 
 127.212778 35.786556 187.945393 
 127.212889 35.786556 187.168661 
 127.211778 35.786667 191.132076 
 127.211889 35.786667 191.279950 
 127.212000 35.786667 191.332763 
 127.212111 35.786667 191.288094 
 127.212333 35.786667 190.898003 
 127.212556 35.786667 190.095282 
 127.212667 35.786667 189.535493 
 127.212778 35.786667 188.869401 
 127.212889 35.786667 188.095309 
 127.211778 35.786778 192.033343 
 127.211889 35.786778 192.193486 
 127.212000 35.786778 192.257772 
 127.212111 35.786778 192.223680 
 127.212333 35.786778 191.851784 
 127.212556 35.786778 191.062831 
 127.212667 35.786778 190.508109 
 127.212778 35.786778 189.845794 
 127.212889 35.786778 189.074145 
 127.211889 35.786778 192.193486 
 127.212000 35.786778 192.257772 
 127.212111 35.786778 192.223680 
 127.212222 35.786778 192.088944 
 127.212444 35.786778 191.510072 
 127.212667 35.786778 190.508109 
 127.212778 35.786778 189.845794 
 127.212889 35.786778 189.074145 
 127.213000 35.786778 188.193966 
 127.211889 35.786889 193.158384 
 127.212000 35.786889 193.234124 
 127.212111 35.786889 193.210563 
 127.212222 35.786889 193.085373 
 127.212444 35.786889 192.522327 
 127.212667 35.786889 191.531415 
 127.212778 35.786889 190.872691 
 127.212889 35.786889 190.103282 
 127.213000 35.786889 189.223946 
 127.211889 35.787000 194.172517 
 127.212000 35.787000 194.259669 
 127.212111 35.787000 194.246568 
 127.212222 35.787000 194.130830 
 127.212444 35.787000 193.583354 
 127.212667 35.787000 192.603159 
 127.212778 35.787000 191.947835 
 127.212889 35.787000 191.180461 
 127.213000 35.787000 190.301752 
 127.212000 35.787000 194.259669 
 127.212111 35.787000 194.246568 
 127.212222 35.787000 194.130830 
 127.212333 35.787000 193.910505 
 127.212556 35.787000 193.148255 
 127.212778 35.787000 191.947835 
 127.212889 35.787000 191.180461 
 127.213000 35.787000 190.301752 
 127.213111 35.787000 189.310157 
 127.212000 35.787111 195.337565 
 127.212111 35.787111 195.334884 
 127.212222 35.787111 195.228532 
 127.212333 35.787111 195.016472 
 127.212556 35.787111 194.267172 
 127.212778 35.787111 193.074540 
 127.212889 35.787111 192.309006 
 127.213000 35.787111 191.430713 
 127.213111 35.787111 190.438080 
 127.212000 35.787222 196.463710 
 127.212111 35.787222 196.471369 
 127.212222 35.787222 196.374298 
 127.212333 35.787222 196.170381 
 127.212556 35.787222 195.433728 
 127.212778 35.787222 194.248522 
 127.212889 35.787222 193.484628 
 127.213000 35.787222 192.606543 
 127.213111 35.787222 191.612656 
 127.212111 35.787222 196.471369 
 127.212222 35.787222 196.374298 
 127.212333 35.787222 196.170381 
 127.212444 35.787222 195.857278 
 127.212667 35.787222 194.897590 
 127.212889 35.787222 193.484628 
 127.213000 35.787222 192.606543 
 127.213111 35.787222 191.612656 
 127.213222 35.787222 190.504626 
 127.212111 35.787333 197.659501 
 127.212222 35.787333 197.571637 
 127.212333 35.787333 197.375764 
 127.212444 35.787333 197.069494 
 127.212667 35.787333 196.119592 
 127.212889 35.787333 194.710940 
 127.213000 35.787333 193.832859 
 127.213111 35.787333 192.837502 
 127.213222 35.787333 191.726511 
 127.212111 35.787444 198.894740 
 127.212222 35.787444 198.815973 
 127.212333 35.787444 198.628016 
 127.212444 35.787444 198.328433 
 127.212667 35.787444 197.387987 
 127.212889 35.787444 195.983269 
 127.213000 35.787444 195.104994 
 127.213111 35.787444 194.107963 
 127.213222 35.787444 192.993802 
 127.212222 35.787444 198.815973 
 127.212333 35.787444 198.628016 
 127.212444 35.787444 198.328433 
 127.212556 35.787444 197.915832 
 127.212778 35.787444 196.744455 
 127.213000 35.787444 195.104994 
 127.213111 35.787444 194.107963 
 127.213222 35.787444 192.993802 
 127.213333 35.787444 191.761184 
 127.212222 35.787556 200.111098 
 127.212333 35.787556 199.930954 
 127.212444 35.787556 199.637937 
 127.212556 35.787556 199.230590 
 127.212778 35.787556 198.065624 
 127.213000 35.787556 196.426849 
 127.213111 35.787556 195.427941 
 127.213222 35.787556 194.310400 
 127.213333 35.787556 193.072882 
 127.212222 35.787667 201.452048 
 127.212333 35.787667 201.279587 
 127.212444 35.787667 200.992990 
 127.212556 35.787667 200.590741 
 127.212778 35.787667 199.431842 
 127.213000 35.787667 197.793383 
 127.213111 35.787667 196.792409 
 127.213222 35.787667 195.671296 
 127.213333 35.787667 194.428688 
 127.212222 35.787778 202.842899 
 127.212333 35.787778 202.678014 
 127.212444 35.787778 202.397716 
 127.212556 35.787778 202.000427 
 127.212778 35.787778 200.847278 
 127.213000 35.787778 199.208778 
 127.213111 35.787778 198.205548 
 127.213222 35.787778 197.080670 
 127.213333 35.787778 195.832774 
 127.212333 35.787778 202.678014 
 127.212444 35.787778 202.397716 
 127.212556 35.787778 202.000427 
 127.212667 35.787778 201.483808 
 127.212889 35.787778 200.088776 
 127.213111 35.787778 198.205548 
 127.213222 35.787778 197.080670 
 127.213333 35.787778 195.832774 
 127.213444 35.787778 194.464594 
 127.212333 35.787889 204.123390 
 127.212444 35.787889 203.849257 
 127.212556 35.787889 203.456782 
 127.212667 35.787889 202.943593 
 127.212889 35.787889 201.551111 
 127.213111 35.787889 199.664514 
 127.213222 35.787889 198.535692 
 127.213333 35.787889 197.282328 
 127.213444 35.787889 195.907168 
 127.212333 35.788000 205.612520 
 127.212444 35.788000 205.344410 
 127.212556 35.788000 204.956600 
 127.212667 35.788000 204.446683 
 127.212889 35.788000 203.056424 
 127.213111 35.788000 201.166128 
 127.213222 35.788000 200.033198 
 127.213333 35.788000 198.774208 
 127.213444 35.788000 197.391914 
 127.212444 35.788000 205.344410 
 127.212556 35.788000 204.956600 
 127.212667 35.788000 204.446683 
 127.212778 35.788000 203.813996 
 127.213000 35.788000 202.174393 
 127.213222 35.788000 200.033198 
 127.213333 35.788000 198.774208 
 127.213444 35.788000 197.391914 
 127.213556 35.788000 195.885339 
 127.212444 35.788111 206.887711 
 127.212556 35.788111 206.504434 
 127.212667 35.788111 205.997648 
 127.212778 35.788111 205.366651 
 127.213000 35.788111 203.726012 
 127.213222 35.788111 201.577777 
 127.213333 35.788111 200.312995 
 127.213444 35.788111 198.923403 
 127.213556 35.788111 197.408022 
 127.212444 35.788222 208.473224 
 127.212556 35.788222 208.094336 
 127.212667 35.788222 207.590533 
 127.212778 35.788222 206.961075 
 127.213000 35.788222 205.319100 
 127.213222 35.788222 203.163536 
 127.213333 35.788222 201.892827 
 127.213444 35.788222 200.495809 
 127.213556 35.788222 198.971505 
 127.212556 35.788222 208.094336 
 127.212667 35.788222 207.590533 
 127.212778 35.788222 206.961075 
 127.212889 35.788222 206.203803 
 127.213111 35.788222 204.305156 
 127.213333 35.788222 201.892827 
 127.213444 35.788222 200.495809 
 127.213556 35.788222 198.971505 
 127.213667 35.788222 197.323939 
 127.212556 35.788333 209.731127 
 127.212667 35.788333 209.230173 
 127.212778 35.788333 208.602117 
 127.212889 35.788333 207.844776 
 127.213111 35.788333 205.941513 
 127.213333 35.788333 203.518550 
 127.213444 35.788333 202.113968 
 127.213556 35.788333 200.580606 
 127.213667 35.788333 198.922523 
 127.212556 35.788444 211.408512 
 127.212667 35.788444 210.910270 
 127.212778 35.788444 210.283478 
 127.212889 35.788444 209.525932 
 127.213111 35.788444 207.617796 
 127.213333 35.788444 205.183969 
 127.213444 35.788444 203.771722 
 127.213556 35.788444 202.229213 
 127.213667 35.788444 200.560538 
 127.212667 35.788444 210.910270 
 127.212778 35.788444 210.283478 
 127.212889 35.788444 209.525932 
 127.213000 35.788444 208.637983 
 127.213222 35.788444 206.466933 
 127.213444 35.788444 203.771722 
 127.213556 35.788444 202.229213 
 127.213667 35.788444 200.560538 
 127.213778 35.788444 198.765200 
 127.212667 35.788556 212.635920 
 127.212778 35.788556 212.010266 
 127.212889 35.788556 211.252388 
 127.213000 35.788556 210.362622 
 127.213222 35.788556 208.183455 
 127.213444 35.788556 205.474164 
 127.213556 35.788556 203.922403 
 127.213667 35.788556 202.243039 
 127.213778 35.788556 200.435586 
 127.212667 35.788667 214.403560 
 127.212778 35.788667 213.778924 
 127.212889 35.788667 213.020594 
 127.213000 35.788667 212.128897 
 127.213222 35.788667 209.941398 
 127.213444 35.788667 207.217845 
 127.213556 35.788667 205.656759 
 127.213667 35.788667 203.966643 
 127.213778 35.788667 202.147026 
 127.212778 35.788778 215.585589 
 127.212889 35.788778 214.826699 
 127.213000 35.788778 213.932968 
 127.213111 35.788778 212.902530 
 127.213333 35.788778 210.434832 
 127.213556 35.788778 207.428563 
 127.213667 35.788778 205.727669 
 127.213778 35.788778 203.895878 
 127.213889 35.788778 201.938727 
 127.212778 35.788889 217.435747 
 127.212889 35.788889 216.676195 
 127.213000 35.788889 215.780331 
 127.213111 35.788889 214.746284 
 127.213333 35.788889 212.266959 
 127.213556 35.788889 209.243269 
 127.213667 35.788889 207.531549 
 127.213778 35.788889 205.687548 
 127.213889 35.788889 203.716862 
 127.212778 35.789000 219.322290 
 127.212889 35.789000 218.561986 
 127.213000 35.789000 217.663910 
 127.213111 35.789000 216.626183 
 127.213333 35.789000 214.135132 
 127.213556 35.789000 211.093980 
 127.213667 35.789000 209.371440 
 127.213778 35.789000 207.515255 
 127.213889 35.789000 205.531077 
 127.212889 35.789000 218.561986 
 127.213000 35.789000 217.663910 
 127.213111 35.789000 216.626183 
 127.213222 35.789000 215.450400 
 127.213444 35.789000 212.683307 
 127.213667 35.789000 209.371440 
 127.213778 35.789000 207.515255 
 127.213889 35.789000 205.531077 
 127.214000 35.789000 203.419011 
 127.212889 35.789111 220.489805 
 127.213000 35.789111 219.589439 
 127.213111 35.789111 218.547964 
 127.213222 35.789111 217.366984 
 127.213444 35.789111 214.585188 
 127.213667 35.789111 211.253018 
 127.213778 35.789111 209.384649 
 127.213889 35.789111 207.386996 
 127.214000 35.789111 205.260185 
 127.212889 35.789222 222.452257 
 127.213000 35.789222 221.549543 
 127.213111 35.789222 220.504274 
 127.213222 35.789222 219.318067 
 127.213444 35.789222 216.521557 
 127.213667 35.789222 213.169145 
 127.213778 35.789222 211.288653 
 127.213889 35.789222 209.277606 
 127.214000 35.789222 207.136154 
 127.213000 35.789222 221.549543 
 127.213111 35.789222 220.504274 
 127.213222 35.789222 219.318067 
 127.213333 35.789222 217.989500 
 127.213556 35.789222 214.913313 
 127.213778 35.789222 211.288653 
 127.213889 35.789222 209.277606 
 127.214000 35.789222 207.136154 
 127.214111 35.789222 204.871437 
 127.213000 35.789333 223.550193 
 127.213111 35.789333 222.501085 
 127.213222 35.789333 221.309616 
 127.213333 35.789333 219.974369 
 127.213556 35.789333 216.880673 
 127.213778 35.789333 213.233153 
 127.213889 35.789333 211.208766 
 127.214000 35.789333 209.052745 
 127.214111 35.789333 206.772303 
 127.213000 35.789445 225.587254 
 127.213111 35.789445 224.534282 
 127.213222 35.789445 223.337540 
 127.213333 35.789445 221.995618 
 127.213556 35.789445 218.884470 
 127.213778 35.789445 215.214223 
 127.213889 35.789445 213.176593 
 127.214000 35.789445 211.006121 
 127.214111 35.789445 208.710091 
 127.213111 35.789445 224.534282 
 127.213222 35.789445 223.337540 
 127.213333 35.789445 221.995618 
 127.213444 35.789445 220.511561 
 127.213667 35.789445 217.118811 
 127.213889 35.789445 213.176593 
 127.214000 35.789445 211.006121 
 127.214111 35.789445 208.710091 
 127.214222 35.789445 206.289275 
 127.213111 35.789556 226.599489 
 127.213222 35.789556 225.397485 
 127.213333 35.789556 224.048918 
 127.213444 35.789556 222.556865 
 127.213667 35.789556 219.144156 
 127.213889 35.789556 215.176937 
 127.214000 35.789556 212.992175 
 127.214111 35.789556 210.680743 
 127.214222 35.789556 208.243445 
 127.213111 35.789667 228.703010 
 127.213222 35.789667 227.495753 
 127.213333 35.789667 226.140563 
 127.213444 35.789667 224.640552 
 127.213667 35.789667 221.208014 
 127.213889 35.789667 217.215999 
 127.214000 35.789667 215.017078 
 127.214111 35.789667 212.690398 
 127.214222 35.789667 210.236790 
 127.213222 35.789667 227.495753 
 127.213333 35.789667 226.140563 
 127.213444 35.789667 224.640552 
 127.213556 35.789667 222.994849 
 127.213778 35.789667 219.279729 
 127.214000 35.789667 215.017078 
 127.214111 35.789667 212.690398 
 127.214222 35.789667 210.236790 
 127.214333 35.789667 207.665063 
 127.213222 35.789778 229.624334 
 127.213333 35.789778 228.262582 
 127.213444 35.789778 226.754696 
 127.213556 35.789778 225.099819 
 127.213778 35.789778 221.362623 
 127.214000 35.789778 217.073197 
 127.214111 35.789778 214.731491 
 127.214222 35.789778 212.261824 
 127.214333 35.789778 209.673087 
 127.213222 35.789889 231.789741 
 127.213333 35.789889 230.421482 
 127.213444 35.789889 228.905791 
 127.213556 35.789889 227.241830 
 127.213778 35.789889 223.482798 
 127.214000 35.789889 219.166918 
 127.214111 35.789889 216.810381 
 127.214222 35.789889 214.324870 
 127.214333 35.789889 211.719360 
 127.213222 35.790000 233.983711 
 127.213333 35.790000 232.609036 
 127.213444 35.790000 231.085655 
 127.213556 35.790000 229.412750 
 127.213778 35.790000 225.632232 
 127.214000 35.790000 221.290349 
 127.214111 35.790000 218.919245 
 127.214222 35.790000 216.418179 
 127.214333 35.790000 213.796212 
 127.213333 35.790000 232.609036 
 127.213444 35.790000 231.085655 
 127.213556 35.790000 229.412750 
 127.213667 35.790000 227.595025 
 127.213889 35.790000 223.530561 
 127.214111 35.790000 218.919245 
 127.214222 35.790000 216.418179 
 127.214333 35.790000 213.796212 
 127.214444 35.790000 211.054861 
 127.213333 35.790111 234.831957 
 127.213444 35.790111 233.300990 
 127.213556 35.790111 231.619264 
 127.213667 35.790111 229.791534 
 127.213889 35.790111 225.703636 
 127.214111 35.790111 221.064651 
 127.214222 35.790111 218.548288 
 127.214333 35.790111 215.910141 
 127.214444 35.790111 213.151767 
 127.213333 35.790222 237.081778 
 127.213444 35.790222 235.543373 
 127.213556 35.790222 233.852998 
 127.213667 35.790222 232.015459 
 127.213889 35.790222 227.904602 
 127.214111 35.790222 223.238526 
 127.214222 35.790222 220.707195 
 127.214333 35.790222 218.053225 
 127.214444 35.790222 215.278208 
 127.213444 35.790222 235.543373 
 127.213556 35.790222 233.852998 
 127.213667 35.790222 232.015459 
 127.213778 35.790222 230.030556 
 127.214000 35.790222 225.637994 
 127.214222 35.790222 220.707195 
 127.214333 35.790222 218.053225 
 127.214444 35.790222 215.278208 
 127.214556 35.790222 212.392721 
 127.213444 35.790333 237.819700 
 127.213556 35.790333 236.120836 
 127.213667 35.790333 234.273670 
 127.213778 35.790333 232.278027 
 127.214000 35.790333 227.860867 
 127.214222 35.790333 222.901642 
 127.214333 35.790333 220.232169 
 127.214444 35.790333 217.440854 
 127.214556 35.790333 214.538361 
 127.213444 35.790445 240.125305 
 127.213556 35.790445 238.418144 
 127.213667 35.790445 236.561567 
 127.213778 35.790445 234.555427 
 127.214000 35.790445 230.114228 
 127.214222 35.790445 225.127236 
 127.214333 35.790445 222.442629 
 127.214444 35.790445 219.635408 
 127.214556 35.790445 216.716327 
 127.213556 35.790445 238.418144 
 127.213667 35.790445 236.561567 
 127.213778 35.790445 234.555427 
 127.213889 35.790445 232.406162 
 127.214111 35.790445 227.687565 
 127.214333 35.790445 222.442629 
 127.214444 35.790445 219.635408 
 127.214556 35.790445 216.716327 
 127.214667 35.790445 213.687635 
 127.213556 35.790556 240.740079 
 127.213667 35.790556 238.874340 
 127.213778 35.790556 236.857979 
 127.213889 35.790556 234.697496 
 127.214111 35.790556 229.953634 
 127.214333 35.790556 224.680035 
 127.214444 35.790556 221.857348 
 127.214556 35.790556 218.922142 
 127.214667 35.790556 215.876706 
 127.213556 35.790667 243.093801 
 127.213667 35.790667 241.219136 
 127.213778 35.790667 239.192814 
 127.213889 35.790667 237.021396 
 127.214111 35.790667 232.252911 
 127.214333 35.790667 226.951388 
 127.214444 35.790667 224.113638 
 127.214556 35.790667 221.162735 
 127.214667 35.790667 218.101005 
 127.213667 35.790667 241.219136 
 127.213778 35.790667 239.192814 
 127.213889 35.790667 237.021396 
 127.214000 35.790667 234.705401 
 127.214222 35.790667 229.665059 
 127.214444 35.790667 224.113638 
 127.214556 35.790667 221.162735 
 127.214667 35.790667 218.101005 
 127.214778 35.790667 214.940647 
 127.213667 35.790778 243.587077 
 127.213778 35.790778 241.551105 
 127.213889 35.790778 239.369093 
 127.214000 35.790778 237.041590 
 127.214222 35.790778 231.975734 
 127.214444 35.790778 226.395836 
 127.214556 35.790778 223.429736 
 127.214667 35.790778 220.352236 
 127.214778 35.790778 217.175625 
 127.213667 35.790889 245.985486 
 127.213778 35.790889 243.940161 
 127.213889 35.790889 241.747873 
 127.214000 35.790889 239.409208 
 127.214222 35.790889 234.318607 
 127.214444 35.790889 228.711095 
 127.214556 35.790889 225.730264 
 127.214667 35.790889 222.637484 
 127.214778 35.790889 219.445129 
 127.213778 35.790889 243.940161 
 127.213889 35.790889 241.747873 
 127.214000 35.790889 239.409208 
 127.214111 35.790889 236.932385 
 127.214333 35.790889 231.577573 
 127.214556 35.790889 225.730264 
 127.214667 35.790889 222.637484 
 127.214778 35.790889 219.445129 
 127.214889 35.790889 216.156161 
 127.213778 35.791000 246.350952 
 127.213889 35.791000 244.148764 
 127.214000 35.791000 241.799338 
 127.214111 35.791000 239.310964 
 127.214333 35.791000 233.930857 
 127.214556 35.791000 228.055721 
 127.214667 35.791000 224.948220 
 127.214778 35.791000 221.740704 
 127.214889 35.791000 218.436171 
 127.213778 35.791111 248.790953 
 127.213889 35.791111 246.579219 
 127.214000 35.791111 244.219417 
 127.214111 35.791111 241.719899 
 127.214333 35.791111 236.315387 
 127.214556 35.791111 230.413410 
 127.214667 35.791111 227.291714 
 127.214778 35.791111 224.069583 
 127.214889 35.791111 220.750052 
 127.213778 35.791222 251.255200 
 127.213889 35.791222 249.034313 
 127.214000 35.791222 246.664551 
 127.214111 35.791222 244.154335 
 127.214333 35.791222 238.726388 
 127.214556 35.791222 232.798637 
 127.214667 35.791222 229.663316 
 127.214778 35.791222 226.427159 
 127.214889 35.791222 223.093242 
 127.213889 35.791222 249.034313 
 127.214000 35.791222 246.664551 
 127.214111 35.791222 244.154335 
 127.214222 35.791222 241.504975 
 127.214444 35.791222 235.820500 
 127.214667 35.791222 229.663316 
 127.214778 35.791222 226.427159 
 127.214889 35.791222 223.093242 
 127.215000 35.791222 219.675346 
 127.213889 35.791333 251.508941 
 127.214000 35.791333 249.129671 
 127.214111 35.791333 246.609236 
 127.214222 35.791333 243.948981 
 127.214444 35.791333 238.240938 
 127.214667 35.791333 232.058174 
 127.214778 35.791333 228.808621 
 127.214889 35.791333 225.460966 
 127.215000 35.791333 222.029071 
 127.213889 35.791445 254.010792 
 127.214000 35.791445 251.622449 
 127.214111 35.791445 249.092255 
 127.214222 35.791445 246.421591 
 127.214444 35.791445 240.691024 
 127.214667 35.791445 234.483815 
 127.214778 35.791445 231.221464 
 127.214889 35.791445 227.860689 
 127.215000 35.791445 224.415430 
 127.214000 35.791445 251.622449 
 127.214111 35.791445 249.092255 
 127.214222 35.791445 246.421591 
 127.214333 35.791445 243.620515 
 127.214556 35.791445 237.644594 
 127.214778 35.791445 231.221464 
 127.214889 35.791445 227.860689 
 127.215000 35.791445 224.415430 
 127.215111 35.791445 220.889346 
 127.214000 35.791556 254.133501 
 127.214111 35.791556 251.594058 
 127.214222 35.791556 248.913522 
 127.214333 35.791556 246.102020 
 127.214556 35.791556 240.103762 
 127.214778 35.791556 233.656688 
 127.214889 35.791556 230.283471 
 127.215000 35.791556 226.825542 
 127.215111 35.791556 223.286597 
 127.214000 35.791667 256.670645 
 127.214111 35.791667 254.122445 
 127.214222 35.791667 251.432558 
 127.214333 35.791667 248.611172 
 127.214556 35.791667 242.591732 
 127.214778 35.791667 236.121954 
 127.214889 35.791667 232.736944 
 127.215000 35.791667 229.267010 
 127.215111 35.791667 225.715883 
 127.214111 35.791667 254.122445 
 127.214222 35.791667 251.432558 
 127.214333 35.791667 248.611172 
 127.214444 35.791667 245.660359 
 127.214667 35.791667 239.407958 
 127.214889 35.791667 232.736944 
 127.215000 35.791667 229.267010 
 127.215111 35.791667 225.715883 
 127.215222 35.791667 222.098651 
 127.214111 35.791778 256.667914 
 127.214222 35.791778 253.969240 
 127.214333 35.791778 251.138562 
 127.214444 35.791778 248.177988 
 127.214667 35.791778 241.904894 
 127.214889 35.791778 235.211960 
 127.215000 35.791778 231.730740 
 127.215111 35.791778 228.168166 
 127.215222 35.791778 224.539394 
 127.214111 35.791889 259.238402 
 127.214222 35.791889 256.531491 
 127.214333 35.791889 253.692096 
 127.214444 35.791889 250.722358 
 127.214667 35.791889 244.429830 
 127.214889 35.791889 237.716311 
 127.215000 35.791889 234.224497 
 127.215111 35.791889 230.651183 
 127.215222 35.791889 227.011591 
 127.214222 35.791889 256.531491 
 127.214333 35.791889 253.692096 
 127.214444 35.791889 250.722358 
 127.214556 35.791889 247.634025 
 127.214778 35.791889 241.122829 
 127.215000 35.791889 234.224497 
 127.215111 35.791889 230.651183 
 127.215222 35.791889 227.011591 
 127.215333 35.791889 223.309964 
 127.214222 35.792000 259.114148 
 127.214333 35.792000 256.266638 
 127.214444 35.792000 253.288366 
 127.214556 35.792000 250.191138 
 127.214778 35.792000 243.661243 
 127.215000 35.792000 236.743335 
 127.215111 35.792000 233.160019 
 127.215222 35.792000 229.510355 
 127.215333 35.792000 225.798616 
 127.214222 35.792111 261.711898 
 127.214333 35.792111 258.856904 
 127.214444 35.792111 255.870750 
 127.214556 35.792111 252.765304 
 127.214778 35.792111 246.218125 
 127.215000 35.792111 239.282123 
 127.215111 35.792111 235.689568 
 127.215222 35.792111 232.030607 
 127.215333 35.792111 228.309542 
 127.214222 35.792222 264.332857 
 127.214333 35.792222 261.470993 
 127.214444 35.792222 258.477597 
 127.214556 35.792222 255.364591 
 127.214778 35.792222 248.801504 
 127.215000 35.792222 241.848851 
 127.215111 35.792222 238.247799 
 127.215222 35.792222 234.580291 
 127.215333 35.792222 230.850660 
 127.214333 35.792222 261.470993 
 127.214444 35.792222 258.477597 
 127.214556 35.792222 255.364591 
 127.214667 35.792222 252.134815 
 127.214889 35.792222 245.368049 
 127.215111 35.792222 238.247799 
 127.215222 35.792222 234.580291 
 127.215333 35.792222 230.850660 
 127.215444 35.792222 227.075113 
 127.214333 35.792333 264.099102 
 127.214444 35.792333 261.099138 
 127.214556 35.792333 257.979269 
 127.214667 35.792333 254.742368 
 127.214889 35.792333 247.960765 
 127.215111 35.792333 240.825168 
 127.215222 35.792333 237.149904 
 127.215333 35.792333 233.412504 
 127.215444 35.792333 229.629226 
 127.214333 35.792444 266.749448 
 127.214444 35.792444 263.743578 
 127.214556 35.792444 260.617530 
 127.214667 35.792444 257.374207 
 127.214889 35.792444 250.579219 
 127.215111 35.792444 243.429786 
 127.215222 35.792444 239.747533 
 127.215333 35.792444 236.003141 
 127.215444 35.792444 232.212915 
 127.214444 35.792444 263.743578 
 127.214556 35.792444 260.617530 
 127.214667 35.792444 257.374207 
 127.214778 35.792444 254.026952 
 127.215000 35.792444 247.045514 
 127.215222 35.792444 239.747533 
 127.215333 35.792444 236.003141 
 127.215444 35.792444 232.212915 
 127.215556 35.792444 228.381606 
 127.214444 35.792555 266.401008 
 127.214556 35.792555 263.269493 
 127.214667 35.792555 260.020481 
 127.214778 35.792555 256.667365 
 127.215000 35.792555 249.673822 
 127.215222 35.792555 242.363485 
 127.215333 35.792555 238.612909 
 127.215444 35.792555 234.816546 
 127.215556 35.792555 230.979168 
 127.214444 35.792667 269.079742 
 127.214556 35.792667 265.943464 
 127.214667 35.792667 262.689486 
 127.214778 35.792667 259.331246 
 127.215000 35.792667 252.327116 
 127.215222 35.792667 245.005984 
 127.215333 35.792667 241.250014 
 127.215444 35.792667 237.448307 
 127.215556 35.792667 233.605658 
 127.214556 35.792667 265.943464 
 127.214667 35.792667 262.689486 
 127.214778 35.792667 259.331246 
 127.214889 35.792667 255.872256 
 127.215111 35.792667 248.699829 
 127.215333 35.792667 241.250014 
 127.215444 35.792667 237.448307 
 127.215556 35.792667 233.605658 
 127.215667 35.792667 229.739048 
 127.214556 35.792778 268.629425 
 127.214667 35.792778 265.371228 
 127.214778 35.792778 262.008626 
 127.214889 35.792778 258.545162 
 127.215111 35.792778 251.363599 
 127.215333 35.792778 243.904607 
 127.215444 35.792778 240.098373 
 127.215556 35.792778 236.251269 
 127.215667 35.792778 232.380310 
 127.214556 35.792889 271.335784 
 127.214667 35.792889 268.074106 
 127.214778 35.792889 264.707898 
 127.214889 35.792889 261.240728 
 127.215111 35.792889 254.051596 
 127.215333 35.792889 246.585023 
 127.215444 35.792889 242.775065 
 127.215556 35.792889 238.924311 
 127.215667 35.792889 235.049804 
 127.214667 35.792889 268.074106 
 127.214778 35.792889 264.707898 
 127.214889 35.792889 261.240728 
 127.215000 35.792889 257.687275 
 127.215222 35.792889 250.349352 
 127.215444 35.792889 242.775065 
 127.215556 35.792889 238.924311 
 127.215667 35.792889 235.049804 
 127.215778 35.792889 231.156656 
 127.214667 35.793000 270.792680 
 127.214778 35.793000 267.423633 
 127.214889 35.793000 263.953538 
 127.215000 35.793000 260.397111 
 127.215222 35.793000 253.053191 
 127.215444 35.793000 245.473027 
 127.215556 35.793000 241.619437 
 127.215667 35.793000 237.742193 
 127.215778 35.793000 233.846421 
 127.214667 35.793111 273.521393 
 127.214778 35.793111 270.150282 
 127.214889 35.793111 266.678051 
 127.215000 35.793111 263.119447 
 127.215222 35.793111 255.771151 
 127.215444 35.793111 248.186742 
 127.215556 35.793111 244.331133 
 127.215667 35.793111 240.451965 
 127.215778 35.793111 236.554377 
 127.214778 35.793111 270.150282 
 127.214889 35.793111 266.678051 
 127.215000 35.793111 263.119447 
 127.215111 35.793111 259.478572 
 127.215333 35.793111 252.001705 
 127.215556 35.793111 244.331133 
 127.215667 35.793111 240.451965 
 127.215778 35.793111 236.554377 
 127.215889 35.793111 232.655819 
 127.214778 35.793222 272.896380 
 127.214889 35.793222 269.422798 
 127.215000 35.793222 265.862810 
 127.215111 35.793222 262.220543 
 127.215333 35.793222 254.740959 
 127.215556 35.793222 247.067893 
 127.215667 35.793222 243.187606 
 127.215778 35.793222 239.289001 
 127.215889 35.793222 235.389543 
 127.214778 35.793333 275.651635 
 127.214889 35.793333 272.177492 
 127.215000 35.793333 268.616921 
 127.215111 35.793333 264.974069 
 127.215333 35.793333 257.493394 
 127.215556 35.793333 249.819460 
 127.215667 35.793333 245.938859 
 127.215778 35.793333 242.040037 
 127.215889 35.793333 238.140468 
 127.214778 35.793444 278.424663 
 127.214889 35.793444 274.950751 
 127.215000 35.793444 271.390395 
 127.215111 35.793444 267.747765 
 127.215333 35.793444 260.267619 
 127.215556 35.793444 252.594435 
 127.215667 35.793444 248.714323 
 127.215778 35.793444 244.816079 
 127.215889 35.793444 240.917184 
 127.214889 35.793444 274.950751 
 127.215000 35.793444 271.390395 
 127.215111 35.793444 267.747765 
 127.215222 35.793444 264.038647 
 127.215444 35.793444 256.451244 
 127.215667 35.793444 248.714323 
 127.215778 35.793444 244.816079 
 127.215889 35.793444 240.917184 
 127.216000 35.793444 237.022987 
 127.214889 35.793555 277.732173 
 127.215000 35.793555 274.172831 
 127.215111 35.793555 270.531226 
 127.215222 35.793555 266.823160 
 127.215444 35.793555 259.237998 
 127.215667 35.793555 251.503575 
 127.215778 35.793555 247.606698 
 127.215889 35.793555 243.709254 
 127.216000 35.793555 239.816598 
 127.214889 35.793667 280.530450 
 127.215000 35.793667 276.972923 
 127.215111 35.793667 273.333149 
 127.215222 35.793667 269.626944 
 127.215444 35.793667 262.045640 
 127.215667 35.793667 254.315315 
 127.215778 35.793667 250.420593 
 127.215889 35.793667 246.525377 
 127.216000 35.793667 242.635025 
 127.215000 35.793667 276.972923 
 127.215111 35.793667 273.333149 
 127.215222 35.793667 269.626944 
 127.215333 35.793667 265.858913 
 127.215556 35.793667 258.192060 
 127.215778 35.793667 250.420593 
 127.215889 35.793667 246.525377 
 127.216000 35.793667 242.635025 
 127.216111 35.793667 238.767133 
 127.215000 35.793778 279.784999 
 127.215111 35.793778 276.147861 
 127.215222 35.793778 272.444320 
 127.215333 35.793778 268.678998 
 127.215556 35.793778 261.017714 
 127.215778 35.793778 253.252054 
 127.215889 35.793778 249.359833 
 127.216000 35.793778 245.472539 
 127.216111 35.793778 241.607760 
 127.215000 35.793889 282.603298 
 127.215111 35.793889 278.969588 
 127.215222 35.793889 275.269507 
 127.215333 35.793889 271.507687 
 127.215556 35.793889 263.853547 
 127.215778 35.793889 256.095235 
 127.215889 35.793889 252.206762 
 127.216000 35.793889 248.323265 
 127.216111 35.793889 244.462320 
 127.215111 35.793889 278.969588 
 127.215222 35.793889 275.269507 
 127.215333 35.793889 271.507687 
 127.215444 35.793889 267.700715 
 127.215667 35.793889 259.983320 
 127.215889 35.793889 252.206762 
 127.216000 35.793889 248.323265 
 127.216111 35.793889 244.462320 
 127.216222 35.793889 240.629370 
 127.215111 35.794000 281.807131 
 127.215222 35.794000 278.111309 
 127.215333 35.794000 274.353792 
 127.215444 35.794000 270.551161 
 127.215667 35.794000 262.842583 
 127.215889 35.794000 255.075003 
 127.216000 35.794000 251.196045 
 127.216111 35.794000 247.339659 
 127.216222 35.794000 243.511284 
 127.215111 35.794111 284.649814 
 127.215222 35.794111 280.959034 
 127.215333 35.794111 277.206599 
 127.215444 35.794111 273.409084 
 127.215667 35.794111 265.710848 
 127.215889 35.794111 257.953725 
 127.216000 35.794111 254.080024 
 127.216111 35.794111 250.228895 
 127.216222 35.794111 246.405774 
 127.215222 35.794111 280.959034 
 127.215333 35.794111 277.206599 
 127.215444 35.794111 273.409084 
 127.215556 35.794111 269.571461 
 127.215778 35.794111 261.832455 
 127.216000 35.794111 254.080024 
 127.216111 35.794111 250.228895 
 127.216222 35.794111 246.405774 
 127.216333 35.794111 242.628077 
 127.215222 35.794222 283.821546 
 127.215333 35.794222 280.074983 
 127.215444 35.794222 276.283368 
 127.215556 35.794222 272.451678 
 127.215778 35.794222 264.724599 
 127.216000 35.794222 256.984128 
 127.216111 35.794222 253.138961 
 127.216222 35.794222 249.321780 
 127.216333 35.794222 245.549975 
 127.215222 35.794333 286.688060 
 127.215333 35.794333 282.948131 
 127.215444 35.794333 279.163170 
 127.215556 35.794333 275.338162 
 127.215778 35.794333 267.624472 
 127.216000 35.794333 259.897362 
 127.216111 35.794333 256.058830 
 127.216222 35.794333 252.248241 
 127.216333 35.794333 248.482957 
 127.215222 35.794444 289.567484 
 127.215333 35.794444 285.834964 
 127.215444 35.794444 282.057428 
 127.215556 35.794444 278.239862 
 127.215778 35.794444 270.541047 
 127.216000 35.794444 262.828721 
 127.216111 35.794444 258.997508 
 127.216222 35.794444 255.194173 
 127.216333 35.794444 251.436048 
 127.215333 35.794444 285.834964 
 127.215444 35.794444 282.057428 
 127.215556 35.794444 278.239862 
 127.215667 35.794444 274.399330 
 127.215889 35.794444 266.682391 
 127.216111 35.794444 258.997508 
 127.216222 35.794444 255.194173 
 127.216333 35.794444 251.436048 
 127.216444 35.794444 247.728534 
 127.215333 35.794555 288.724588 
 127.215444 35.794555 284.955210 
 127.215556 35.794555 281.145810 
 127.215667 35.794555 277.313429 
 127.215889 35.794555 269.612715 
 127.216111 35.794555 261.943838 
 127.216222 35.794555 258.148380 
 127.216333 35.794555 254.398013 
 127.216444 35.794555 250.698128 
 127.215333 35.794667 291.625961 
 127.215444 35.794667 287.865490 
 127.215556 35.794667 284.064998 
 127.215667 35.794667 280.241497 
 127.215889 35.794667 272.558420 
 127.216111 35.794667 264.906886 
 127.216222 35.794667 261.119941 
 127.216333 35.794667 257.377943 
 127.216444 35.794667 253.686272 
 127.215444 35.794667 287.865490 
 127.215556 35.794667 284.064998 
 127.215667 35.794667 280.241497 
 127.215778 35.794667 276.400197 
 127.216000 35.794667 268.721514 
 127.216222 35.794667 261.119941 
 127.216333 35.794667 257.377943 
 127.216444 35.794667 253.686272 
 127.216556 35.794667 250.061826 
 127.215444 35.794778 290.782278 
 127.215556 35.794778 286.991409 
 127.215667 35.794778 283.177489 
 127.215778 35.794778 279.345727 
 127.216000 35.794778 271.685876 
 127.216222 35.794778 264.102674 
 127.216333 35.794778 260.369628 
 127.216444 35.794778 256.686728 
 127.216556 35.794778 253.070832 
 127.215444 35.794889 293.699527 
 127.215556 35.794889 289.918965 
 127.215667 35.794889 286.115297 
 127.215778 35.794889 282.293727 
 127.216000 35.794889 274.653964 
 127.216222 35.794889 267.090307 
 127.216333 35.794889 263.366762 
 127.216444 35.794889 259.693157 
 127.216556 35.794889 256.086307 
 127.215556 35.794889 289.918965 
 127.215667 35.794889 286.115297 
 127.215778 35.794889 282.293727 
 127.215889 35.794889 278.471504 
 127.216111 35.794889 270.858436 
 127.216333 35.794889 263.366762 
 127.216444 35.794889 259.693157 
 127.216556 35.794889 256.086307 
 127.216667 35.794889 252.551456 
 127.215556 35.795000 292.856699 
 127.215667 35.795000 289.063974 
 127.215778 35.795000 285.253273 
 127.215889 35.795000 281.441803 
 127.216111 35.795000 273.849828 
 127.216333 35.795000 266.378509 
 127.216444 35.795000 262.714737 
 127.216556 35.795000 259.117442 
 127.216667 35.795000 255.591854 
 127.215556 35.795111 295.793466 
 127.215667 35.795111 292.012323 
 127.215778 35.795111 288.213112 
 127.215889 35.795111 284.412999 
 127.216111 35.795111 276.843266 
 127.216333 35.795111 269.393354 
 127.216444 35.795111 265.739903 
 127.216556 35.795111 262.152623 
 127.216667 35.795111 258.636726 
 127.215667 35.795111 292.012323 
 127.215778 35.795111 288.213112 
 127.215889 35.795111 284.412999 
 127.216000 35.795111 280.617304 
 127.216222 35.795111 273.096252 
 127.216444 35.795111 265.739903 
 127.216556 35.795111 262.152623 
 127.216667 35.795111 258.636726 
 127.216778 35.795111 255.208351 
 127.215667 35.795222 294.969411 
 127.215778 35.795222 291.182338 
 127.215889 35.795222 287.394210 
 127.216000 35.795222 283.610335 
 127.216222 35.795222 276.112279 
 127.216444 35.795222 268.777869 
 127.216556 35.795222 265.201077 
 127.216667 35.795222 261.695318 
 127.216778 35.795222 258.276679 
 127.215667 35.795333 297.923991 
 127.215778 35.795333 294.149643 
 127.215889 35.795333 290.374067 
 127.216000 35.795333 286.602562 
 127.216222 35.795333 279.128528 
 127.216444 35.795333 271.816982 
 127.216556 35.795333 268.251100 
 127.216667 35.795333 264.755868 
 127.216778 35.795333 261.347326 
 127.215778 35.795333 294.149643 
 127.215889 35.795333 290.374067 
 127.216000 35.795333 286.602562 
 127.216111 35.795333 282.852269 
 127.216333 35.795333 275.448332 
 127.216556 35.795333 268.251100 
 127.216667 35.795333 264.755868 
 127.216778 35.795333 261.347326 
 127.216889 35.795333 258.030458 
 127.215778 35.795444 297.124125 
 127.215889 35.795444 293.361695 
 127.216000 35.795444 289.603131 
 127.216111 35.795444 285.865522 
 127.216333 35.795444 278.486083 
 127.216556 35.795444 271.311943 
 127.216667 35.795444 267.827647 
 127.216778 35.795444 264.429577 
 127.216889 35.795444 261.122699 
 127.215778 35.795556 300.099549 
 127.215889 35.795556 296.350820 
 127.216000 35.795556 292.605731 
 127.216111 35.795556 288.881314 
 127.216333 35.795556 281.527314 
 127.216556 35.795556 274.377098 
 127.216667 35.795556 270.904110 
 127.216778 35.795556 267.516851 
 127.216889 35.795556 264.220270 
 127.215778 35.795667 303.069667 
 127.215889 35.795667 299.335148 
 127.216000 35.795667 295.604023 
 127.216111 35.795667 291.893265 
 127.216333 35.795667 284.565561 
 127.216556 35.795667 277.440016 
 127.216667 35.795667 273.978666 
 127.216778 35.795667 270.602518 
 127.216889 35.795667 267.316502 
 127.215889 35.795667 299.335148 
 127.216000 35.795667 295.604023 
 127.216111 35.795667 291.893265 
 127.216222 35.795667 288.208170 
 127.216444 35.795667 280.970691 
 127.216667 35.795667 273.978666 
 127.216778 35.795667 270.602518 
 127.216889 35.795667 267.316502 
 127.217000 35.795667 264.133262 
 127.215889 35.795778 302.323788 
 127.216000 35.795778 298.607144 
 127.216111 35.795778 294.910537 
 127.216222 35.795778 291.239247 
 127.216444 35.795778 284.028140 
 127.216667 35.795778 277.060592 
 127.216778 35.795778 273.695872 
 127.216889 35.795778 270.420707 
 127.217000 35.795778 267.247694 
 127.215889 35.795889 305.305298 
 127.216000 35.795889 301.603582 
 127.216111 35.795889 297.921549 
 127.216222 35.795889 294.264463 
 127.216444 35.795889 287.080446 
 127.216667 35.795889 280.137981 
 127.216778 35.795889 276.784948 
 127.216889 35.795889 273.520860 
 127.217000 35.795889 270.358269 
 127.216000 35.795889 301.603582 
 127.216111 35.795889 297.921549 
 127.216222 35.795889 294.264463 
 127.216333 35.795889 290.649023 
 127.216556 35.795889 283.575068 
 127.216778 35.795889 276.784948 
 127.216889 35.795889 273.520860 
 127.217000 35.795889 270.358269 
 127.217111 35.795889 267.309106 
 127.216000 35.796000 304.602448 
 127.216111 35.796000 300.935443 
 127.216222 35.796000 297.292987 
 127.216333 35.796000 293.691717 
 127.216556 35.796000 286.644599 
 127.216778 35.796000 279.879026 
 127.216889 35.796000 276.626261 
 127.217000 35.796000 273.474304 
 127.217111 35.796000 270.435042 
 127.216000 35.796111 307.592228 
 127.216111 35.796111 303.940629 
 127.216222 35.796111 300.313159 
 127.216333 35.796111 296.726388 
 127.216556 35.796111 289.706681 
 127.216778 35.796111 282.966117 
 127.216889 35.796111 279.724858 
 127.217000 35.796111 276.583689 
 127.217111 35.796111 273.554451 
 127.216111 35.796111 303.940629 
 127.216222 35.796111 300.313159 
 127.216333 35.796111 296.726388 
 127.216444 35.796111 293.185491 
 127.216667 35.796111 286.295009 
 127.216889 35.796111 279.724858 
 127.217000 35.796111 276.583689 
 127.217111 35.796111 273.554451 
 127.217222 35.796111 270.641569 
 127.216111 35.796222 306.946213 
 127.216222 35.796222 303.334112 
 127.216333 35.796222 299.762196 
 127.216444 35.796222 296.235619 
 127.216667 35.796222 289.371952 
 127.216889 35.796222 282.825926 
 127.217000 35.796222 279.695713 
 127.217111 35.796222 276.676636 
 127.217222 35.796222 273.773098 
 127.216111 35.796333 309.945765 
 127.216222 35.796333 306.349372 
 127.216333 35.796333 302.792620 
 127.216444 35.796333 299.280645 
 127.216667 35.796333 292.444270 
 127.216889 35.796333 285.922723 
 127.217000 35.796333 282.803599 
 127.217111 35.796333 279.794781 
 127.217222 35.796333 276.900654 
 127.216222 35.796333 306.349372 
 127.216333 35.796333 302.792620 
 127.216444 35.796333 299.280645 
 127.216556 35.796333 295.829525 
 127.216778 35.796333 289.140399 
 127.217000 35.796333 282.803599 
 127.217111 35.796333 279.794781 
 127.217222 35.796333 276.900654 
 127.217333 35.796333 274.134495 
 127.216222 35.796444 309.352496 
 127.216333 35.796444 305.811169 
 127.216444 35.796444 302.314029 
 127.216556 35.796444 298.877087 
 127.216778 35.796444 292.214215 
 127.217000 35.796444 285.900586 
 127.217111 35.796444 282.902088 
 127.217222 35.796444 280.017402 
 127.217333 35.796444 277.259758 
 127.216222 35.796556 312.352536 
 127.216333 35.796556 308.826924 
 127.216444 35.796556 305.344881 
 127.216556 35.796556 301.922349 
 127.216778 35.796556 295.286106 
 127.217000 35.796556 288.995894 
 127.217111 35.796556 286.007791 
 127.217222 35.796556 283.132590 
 127.217333 35.796556 280.383470 
 127.216222 35.796667 315.337894 
 127.216333 35.796667 311.828212 
 127.216444 35.796667 308.361454 
 127.216556 35.796667 304.953492 
 127.216778 35.796667 298.344114 
 127.217000 35.796667 292.077444 
 127.217111 35.796667 289.099755 
 127.217222 35.796667 286.234028 
 127.217333 35.796667 283.493394 
 127.216333 35.796667 311.828212 
 127.216444 35.796667 308.361454 
 127.216556 35.796667 304.953492 
 127.216667 35.796667 301.609270 
 127.216889 35.796667 295.162769 
 127.217111 35.796667 289.099755 
 127.217222 35.796667 286.234028 
 127.217333 35.796667 283.493394 
 127.217444 35.796667 280.881826 
 127.216333 35.796778 314.824045 
 127.216444 35.796778 311.372788 
 127.216556 35.796778 307.979584 
 127.216667 35.796778 304.649353 
 127.216889 35.796778 298.228315 
 127.217111 35.796778 292.187147 
 127.217222 35.796778 289.330897 
 127.217333 35.796778 286.598721 
 127.217444 35.796778 283.994573 
 127.216333 35.796889 317.802806 
 127.216444 35.796889 314.367191 
 127.216556 35.796889 310.988859 
 127.216667 35.796889 307.672706 
 127.216889 35.796889 301.277223 
 127.217111 35.796889 295.257884 
 127.217222 35.796889 292.411059 
 127.217333 35.796889 289.687262 
 127.217444 35.796889 287.090430 
 127.216444 35.796889 314.367191 
 127.216556 35.796889 310.988859 
 127.216667 35.796889 307.672706 
 127.216778 35.796889 304.433927 
 127.217000 35.796889 298.214701 
 127.217222 35.796889 292.411059 
 127.217333 35.796889 289.687262 
 127.217444 35.796889 287.090430 
 127.217556 35.796889 284.632436 
 127.216444 35.797000 317.353620 
 127.216556 35.797000 313.990301 
 127.216667 35.797000 310.688339 
 127.216778 35.797000 307.462861 
 127.217000 35.797000 301.267452 
 127.217222 35.797000 295.483615 
 127.217333 35.797000 292.768129 
 127.217444 35.797000 290.178514 
 127.217556 35.797000 287.726604 
 127.216444 35.797111 320.320461 
 127.216556 35.797111 316.972222 
 127.216667 35.797111 313.684493 
 127.216778 35.797111 310.472331 
 127.217000 35.797111 304.300688 
 127.217222 35.797111 298.536501 
 127.217333 35.797111 295.829211 
 127.217444 35.797111 293.246671 
 127.217556 35.797111 290.800679 
 127.216556 35.797111 316.972222 
 127.216667 35.797111 313.684493 
 127.216778 35.797111 310.472331 
 127.216889 35.797111 307.340396 
 127.217111 35.797111 301.364640 
 127.217333 35.797111 295.829211 
 127.217444 35.797111 293.246671 
 127.217556 35.797111 290.800679 
 127.217667 35.797111 288.494740 
 127.216556 35.797222 319.943509 
 127.216667 35.797222 316.670079 
 127.216778 35.797222 313.471271 
 127.216889 35.797222 310.351723 
 127.217111 35.797222 304.397640 
 127.217333 35.797222 298.879517 
 127.217444 35.797222 296.303917 
 127.217556 35.797222 293.863679 
 127.217667 35.797222 291.562294 
 127.216556 35.797333 322.897632 
 127.216667 35.797333 319.638521 
 127.216778 35.797333 316.453062 
 127.216889 35.797333 313.345867 
 127.217111 35.797333 307.413307 
 127.217333 35.797333 301.912236 
 127.217444 35.797333 299.343409 
 127.217556 35.797333 296.908733 
 127.217667 35.797333 294.611687 
 127.216667 35.797333 319.638521 
 127.216778 35.797333 316.453062 
 127.216889 35.797333 313.345867 
 127.217000 35.797333 310.328835 
 127.217222 35.797333 304.603492 
 127.217444 35.797333 299.343409 
 127.217556 35.797333 296.908733 
 127.217667 35.797333 294.611687 
 127.217778 35.797333 292.462726 
 127.216667 35.797444 322.583362 
 127.216778 35.797444 319.411198 
 127.216889 35.797444 316.316281 
 127.217000 35.797444 313.310456 
 127.217222 35.797444 307.604158 
 127.217444 35.797444 302.358426 
 127.217556 35.797444 299.929095 
 127.217667 35.797444 297.636147 
 127.217778 35.797444 295.490013 
 127.216667 35.797556 325.513336 
 127.216778 35.797556 322.354439 
 127.216889 35.797556 319.271742 
 127.217000 35.797556 316.277040 
 127.217222 35.797556 310.589539 
 127.217444 35.797556 305.357804 
 127.217556 35.797556 302.933600 
 127.217667 35.797556 300.644508 
 127.217778 35.797556 298.500936 
 127.216667 35.797667 328.416976 
 127.216778 35.797667 325.271250 
 127.216889 35.797667 322.200654 
 127.217000 35.797667 319.216931 
 127.217222 35.797667 313.547875 
 127.217444 35.797667 308.329695 
 127.217556 35.797667 305.910369 
 127.217667 35.797667 303.624863 
 127.217778 35.797667 301.483563 
 127.216778 35.797667 325.271250 
 127.216889 35.797667 322.200654 
 127.217000 35.797667 319.216931 
 127.217111 35.797667 316.331287 
 127.217333 35.797667 310.879404 
 127.217556 35.797667 305.910369 
 127.217667 35.797667 303.624863 
 127.217778 35.797667 301.483563 
 127.217889 35.797667 299.489479 
 127.216778 35.797778 328.170248 
 127.216889 35.797778 325.111654 
 127.217000 35.797778 322.138786 
 127.217111 35.797778 319.262805 
 127.217333 35.797778 313.826573 
 127.217556 35.797778 308.868094 
 127.217667 35.797778 306.585899 
 127.217778 35.797778 304.446575 
 127.217889 35.797778 302.453123 
 127.216778 35.797889 331.040058 
 127.216889 35.797889 327.993304 
 127.217000 35.797889 325.031108 
 127.217111 35.797889 322.164586 
 127.217333 35.797889 316.743536 
 127.217556 35.797889 311.795065 
 127.217667 35.797889 309.515882 
 127.217778 35.797889 307.378217 
 127.217889 35.797889 305.385063 
 127.216889 35.797889 327.993304 
 127.217000 35.797889 325.031108 
 127.217111 35.797889 322.164586 
 127.217222 35.797889 319.397854 
 127.217444 35.797889 314.205421 
 127.217667 35.797889 309.515882 
 127.217778 35.797889 307.378217 
 127.217889 35.797889 305.385063 
 127.218000 35.797889 303.545429 
 127.216889 35.798000 330.854090 
 127.217000 35.798000 327.902398 
 127.217111 35.798000 325.045145 
 127.217222 35.798000 322.286426 
 127.217444 35.798000 317.106111 
 127.217667 35.798000 312.423339 
 127.217778 35.798000 310.287008 
 127.217889 35.798000 308.293807 
 127.218000 35.798000 306.452741 
 127.216889 35.798111 333.687600 
 127.217000 35.798111 330.746208 
 127.217111 35.798111 327.897995 
 127.217222 35.798111 325.147041 
 127.217444 35.798111 319.978290 
 127.217667 35.798111 315.301653 
 127.217778 35.798111 313.166314 
 127.217889 35.798111 311.172709 
 127.218000 35.798111 309.329838 
 127.217000 35.798111 330.746208 
 127.217111 35.798111 327.897995 
 127.217222 35.798111 325.147041 
 127.217333 35.798111 322.505886 
 127.217556 35.798111 317.575749 
 127.217778 35.798111 313.166314 
 127.217889 35.798111 311.172709 
 127.218000 35.798111 309.329838 
 127.218111 35.798111 307.640226 
 127.217000 35.798222 333.556282 
 127.217111 35.798222 330.716851 
 127.217222 35.798222 327.973383 
 127.217333 35.798222 325.338380 
 127.217556 35.798222 320.416473 
 127.217778 35.798222 316.009715 
 127.217889 35.798222 314.015337 
 127.218000 35.798222 312.170280 
 127.218111 35.798222 310.477068 
 127.217000 35.798333 336.340861 
 127.217111 35.798333 333.509962 
 127.217222 35.798333 330.773711 
 127.217333 35.798333 328.144570 
 127.217556 35.798333 323.230251 
 127.217778 35.798333 318.825454 
 127.217889 35.798333 316.829921 
 127.218000 35.798333 314.982282 
 127.218111 35.798333 313.285057 
 127.217111 35.798333 333.509962 
 127.217222 35.798333 330.773711 
 127.217333 35.798333 328.144570 
 127.217444 35.798333 325.626269 
 127.217667 35.798333 320.959886 
 127.217889 35.798333 316.829921 
 127.218000 35.798333 314.982282 
 127.218111 35.798333 313.285057 
 127.218222 35.798333 311.745847 
 127.217111 35.798444 336.266294 
 127.217222 35.798444 333.536947 
 127.217333 35.798444 330.913339 
 127.217444 35.798444 328.399188 
 127.217667 35.798444 323.736870 
 127.217889 35.798444 319.605252 
 127.218000 35.798444 317.754631 
 127.218111 35.798444 316.052987 
 127.218222 35.798444 314.507933 
 127.217111 35.798556 338.993903 
 127.217222 35.798556 336.271154 
 127.217333 35.798556 333.652756 
 127.217444 35.798556 331.142413 
 127.217667 35.798556 326.483423 
 127.217889 35.798556 322.349355 
 127.218000 35.798556 320.495335 
 127.218111 35.798556 318.788840 
 127.218222 35.798556 317.237502 
 127.217222 35.798667 338.965505 
 127.217333 35.798667 336.351959 
 127.217444 35.798667 333.845054 
 127.217556 35.798667 331.456160 
 127.217778 35.798667 327.052680 
 127.218000 35.798667 323.193456 
 127.218111 35.798667 321.481689 
 127.218222 35.798667 319.923640 
 127.218333 35.798667 318.521359 
 127.217222 35.798778 341.627852 
 127.217333 35.798778 339.018803 
 127.217444 35.798778 336.514962 
 127.217556 35.798778 334.127682 
 127.217778 35.798778 329.723040 
 127.218000 35.798778 325.856776 
 127.218111 35.798778 324.139291 
 127.218222 35.798778 322.574075 
 127.218333 35.798778 321.163184 
 127.217222 35.798889 344.252118 
 127.217333 35.798889 341.647186 
 127.217444 35.798889 339.146018 
 127.217556 35.798889 336.759947 
 127.217778 35.798889 332.353305 
 127.218000 35.798889 328.479130 
 127.218111 35.798889 326.755479 
 127.218222 35.798889 325.182647 
 127.218333 35.798889 323.762692 
 127.217333 35.798889 341.647186 
 127.217444 35.798889 339.146018 
 127.217556 35.798889 336.759947 
 127.217667 35.798889 334.492297 
 127.217889 35.798889 330.345910 
 127.218111 35.798889 326.755479 
 127.218222 35.798889 325.182647 
 127.218333 35.798889 323.762692 
 127.218444 35.798889 322.501881 
 127.217333 35.799000 344.231287 
 127.217444 35.799000 341.732383 
 127.217556 35.799000 339.347105 
 127.217667 35.799000 337.078769 
 127.217889 35.799000 332.926560 
 127.218111 35.799000 329.324394 
 127.218222 35.799000 327.743505 
 127.218333 35.799000 326.314044 
 127.218444 35.799000 325.042315 
 127.217333 35.799111 346.778614 
 127.217444 35.799111 344.281559 
 127.217556 35.799111 341.896648 
 127.217667 35.799111 339.627189 
 127.217889 35.799111 335.468257 
 127.218111 35.799111 331.853425 
 127.218222 35.799111 330.264004 
 127.218333 35.799111 328.824560 
 127.218444 35.799111 327.541435 
 127.217444 35.799111 344.281559 
 127.217556 35.799111 341.896648 
 127.217667 35.799111 339.627189 
 127.217778 35.799111 337.483415 
 127.218000 35.799111 333.590755 
 127.218222 35.799111 330.264004 
 127.218333 35.799111 328.824560 
 127.218444 35.799111 327.541435 
 127.218556 35.799111 326.416220 
 127.217444 35.799222 346.783406 
 127.217556 35.799222 344.398425 
 127.217667 35.799222 342.127401 
 127.217778 35.799222 339.980566 
 127.218000 35.799222 336.077305 
 127.218222 35.799222 332.734050 
 127.218333 35.799222 331.284176 
 127.218444 35.799222 329.989212 
 127.218556 35.799222 328.850758 
 127.217444 35.799333 349.245175 
 127.217556 35.799333 346.859674 
 127.217667 35.799333 344.586626 
 127.217778 35.799333 342.436266 
 127.218000 35.799333 338.521456 
 127.218222 35.799333 335.160732 
 127.218333 35.799333 333.699945 
 127.218444 35.799333 332.392657 
 127.218556 35.799333 331.240479 
 127.217556 35.799333 346.859674 
 127.217667 35.799333 344.586626 
 127.217778 35.799333 342.436266 
 127.217889 35.799333 340.411519 
 127.218111 35.799333 336.768596 
 127.218333 35.799333 333.699945 
 127.218444 35.799333 332.392657 
 127.218556 35.799333 331.240479 
 127.218667 35.799333 330.248387 
 127.217556 35.799444 349.270589 
 127.217667 35.799444 346.995058 
 127.217778 35.799444 344.840711 
 127.217889 35.799444 342.810473 
 127.218111 35.799444 339.152108 
 127.218333 35.799444 336.062177 
 127.218444 35.799444 334.742122 
 127.218556 35.799444 333.575784 
 127.218667 35.799444 332.568195 
 127.217556 35.799556 351.638139 
 127.217667 35.799556 349.359648 
 127.217778 35.799556 347.200833 
 127.217889 35.799556 345.164618 
 127.218111 35.799556 341.489832 
 127.218333 35.799556 338.377640 
 127.218444 35.799556 337.044330 
 127.218556 35.799556 335.863348 
 127.218667 35.799556 334.839783 
 127.217667 35.799556 349.359648 
 127.217778 35.799556 347.200833 
 127.217889 35.799556 345.164618 
 127.218000 35.799556 343.260109 
 127.218222 35.799556 339.861645 
 127.218444 35.799556 337.044330 
 127.218556 35.799556 335.863348 
 127.218667 35.799556 334.839783 
 127.218778 35.799556 333.974782 
 127.217667 35.799667 351.670962 
 127.217778 35.799667 349.507207 
 127.217889 35.799667 347.464543 
 127.218000 35.799667 345.552099 
 127.218222 35.799667 342.133353 
 127.218444 35.799667 339.290039 
 127.218556 35.799667 338.093980 
 127.218667 35.799667 337.054017 
 127.218778 35.799667 336.171310 
 127.217667 35.799778 353.935669 
 127.217778 35.799778 351.766476 
 127.217889 35.799778 349.716866 
 127.218000 35.799778 347.795989 
 127.218222 35.799778 344.355968 
 127.218444 35.799778 341.485671 
 127.218556 35.799778 340.274052 
 127.218667 35.799778 339.217215 
 127.218778 35.799778 338.316336 
 127.217667 35.799889 356.148485 
 127.217778 35.799889 353.973362 
 127.217889 35.799889 351.916312 
 127.218000 35.799889 349.986514 
 127.218222 35.799889 346.524254 
 127.218444 35.799889 343.626039 
 127.218556 35.799889 342.398405 
 127.218667 35.799889 341.324250 
 127.218778 35.799889 340.404764 
 127.217778 35.799889 353.973362 
 127.217889 35.799889 351.916312 
 127.218000 35.799889 349.986514 
 127.218111 35.799889 348.186505 
 127.218333 35.799889 345.001878 
 127.218556 35.799889 342.398405 
 127.218667 35.799889 341.324250 
 127.218778 35.799889 340.404764 
 127.218889 35.799889 339.643772 
 127.217778 35.800000 356.122970 
 127.217889 35.800000 354.058000 
 127.218000 35.800000 352.118805 
 127.218111 35.800000 350.307929 
 127.218333 35.800000 347.097288 
 127.218556 35.800000 344.462292 
 127.218667 35.800000 343.370409 
 127.218778 35.800000 342.431922 
 127.218889 35.800000 341.650731 
 127.217778 35.800111 358.221491 
 127.217889 35.800111 356.148089 
 127.218000 35.800111 354.198989 
 127.218111 35.800111 352.376740 
 127.218333 35.800111 349.139091 
 127.218556 35.800111 346.471610 
 127.218667 35.800111 345.361532 
 127.218778 35.800111 344.403588 
 127.218889 35.800111 343.601755 
 127.217889 35.800111 356.148089 
 127.218000 35.800111 354.198989 
 127.218111 35.800111 352.376740 
 127.218222 35.800111 350.689396 
 127.218444 35.800111 347.732599 
 127.218667 35.800111 345.361532 
 127.218778 35.800111 344.403588 
 127.218889 35.800111 343.601755 
 127.219000 35.800111 342.956764 
 127.217889 35.800222 358.178218 
 127.218000 35.800222 356.218736 
 127.218111 35.800222 354.384648 
 127.218222 35.800222 352.684052 
 127.218444 35.800222 349.696602 
 127.218667 35.800222 347.289611 
 127.218778 35.800222 346.311826 
 127.218889 35.800222 345.488986 
 127.219000 35.800222 344.821839 
 127.217889 35.800333 360.154227 
 127.218000 35.800333 358.183850 
 127.218111 35.800333 356.337416 
 127.218222 35.800333 354.623068 
 127.218444 35.800333 351.603992 
 127.218667 35.800333 349.160148 
 127.218778 35.800333 348.162078 
 127.218889 35.800333 347.317801 
 127.219000 35.800333 346.628083 
 127.218000 35.800333 358.183850 
 127.218111 35.800333 356.337416 
 127.218222 35.800333 354.623068 
 127.218333 35.800333 353.042964 
 127.218556 35.800333 350.307870 
 127.218778 35.800333 348.162078 
 127.218889 35.800333 347.317801 
 127.219000 35.800333 346.628083 
 127.219111 35.800333 346.095605 
 127.218000 35.800444 360.086464 
 127.218111 35.800444 358.227218 
 127.218222 35.800444 356.498669 
 127.218333 35.800444 354.902982 
 127.218556 35.800444 352.132782 
 127.218778 35.800444 349.946898 
 127.218889 35.800444 349.080835 
 127.219000 35.800444 348.368218 
 127.219111 35.800444 347.811817 
 127.218000 35.800556 361.932044 
 127.218111 35.800556 360.059480 
 127.218222 35.800556 358.316232 
 127.218333 35.800556 356.704476 
 127.218556 35.800556 353.898233 
 127.218778 35.800556 351.671378 
 127.218889 35.800556 350.783113 
 127.219000 35.800556 350.047198 
 127.219111 35.800556 349.466495 
 127.218111 35.800556 360.059480 
 127.218222 35.800556 358.316232 
 127.218333 35.800556 356.704476 
 127.218444 35.800556 355.231228 
 127.218667 35.800556 352.711187 
 127.218889 35.800556 350.783113 
 127.219000 35.800556 350.047198 
 127.219111 35.800556 349.466495 
 127.219222 35.800556 349.041313 
 127.218111 35.800667 361.829851 
 127.218222 35.800667 360.071434 
 127.218333 35.800667 358.443153 
 127.218444 35.800667 356.952088 
 127.218667 35.800667 354.392661 
 127.218889 35.800667 352.420541 
 127.219000 35.800667 351.660977 
 127.219111 35.800667 351.055643 
 127.219222 35.800667 350.604867 
 127.218111 35.800778 363.534443 
 127.218222 35.800778 361.760417 
 127.218333 35.800778 360.115188 
 127.218444 35.800778 358.605902 
 127.218667 35.800778 356.006342 
 127.218889 35.800778 353.989509 
 127.219000 35.800778 353.205997 
 127.219111 35.800778 352.575757 
 127.219222 35.800778 352.099136 
 127.218111 35.800889 365.178154 
 127.218222 35.800889 363.388029 
 127.218333 35.800889 361.725376 
 127.218444 35.800889 360.197410 
 127.218667 35.800889 357.556842 
 127.218889 35.800889 355.494497 
 127.219000 35.800889 354.686666 
 127.219111 35.800889 354.031168 
 127.219222 35.800889 353.528373 
 127.218222 35.800889 363.388029 
 127.218333 35.800889 361.725376 
 127.218444 35.800889 360.197410 
 127.218556 35.800889 358.805922 
 127.218778 35.800889 356.451511 
 127.219000 35.800889 354.686666 
 127.219111 35.800889 354.031168 
 127.219222 35.800889 353.528373 
 127.219333 35.800889 353.179975 
 127.218222 35.801000 364.947752 
 127.218333 35.801000 363.267265 
 127.218444 35.801000 361.720227 
 127.218556 35.801000 360.308448 
 127.218778 35.801000 357.910052 
 127.219000 35.801000 356.097026 
 127.219111 35.801000 355.416019 
 127.219222 35.801000 354.886822 
 127.219333 35.801000 354.511235 
 127.218222 35.801111 366.444069 
 127.218333 35.801111 364.745281 
 127.218444 35.801111 363.178724 
 127.218556 35.801111 361.746222 
 127.218778 35.801111 359.303035 
 127.219000 35.801111 357.441105 
 127.219111 35.801111 356.734260 
 127.219222 35.801111 356.178357 
 127.219333 35.801111 355.775298 
 127.218333 35.801111 364.745281 
 127.218444 35.801111 363.178724 
 127.218556 35.801111 361.746222 
 127.218667 35.801111 360.453866 
 127.218889 35.801111 358.298480 
 127.219111 35.801111 356.734260 
 127.219222 35.801111 356.178357 
 127.219333 35.801111 355.775298 
 127.219444 35.801111 355.524989 
 127.218333 35.801222 366.153509 
 127.218444 35.801222 364.567058 
 127.218556 35.801222 363.113480 
 127.218667 35.801222 361.798952 
 127.218889 35.801222 359.596080 
 127.219111 35.801222 357.980594 
 127.219222 35.801222 357.397781 
 127.219333 35.801222 356.967077 
 127.219444 35.801222 356.688406 
 127.218333 35.801333 367.495998 
 127.218444 35.801333 365.889218 
 127.218556 35.801333 364.414150 
 127.218667 35.801333 363.077055 
 127.218889 35.801333 360.825970 
 127.219111 35.801333 359.158583 
 127.219222 35.801333 358.548581 
 127.219333 35.801333 358.089974 
 127.219444 35.801333 357.782711 
 127.218444 35.801333 365.889218 
 127.218556 35.801333 364.414150 
 127.218667 35.801333 363.077055 
 127.218778 35.801333 361.879349 
 127.219000 35.801333 359.917865 
 127.219222 35.801333 358.548581 
 127.219333 35.801333 358.089974 
 127.219444 35.801333 357.782711 
 127.219556 35.801333 357.627448 
 127.218444 35.801444 367.139916 
 127.218556 35.801444 365.643025 
 127.218667 35.801444 364.283055 
 127.218778 35.801444 363.061443 
 127.219000 35.801444 361.049357 
 127.219222 35.801444 359.626136 
 127.219333 35.801444 359.139480 
 127.219444 35.801444 358.803506 
 127.219556 35.801444 358.618980 
 127.218444 35.801556 368.322756 
 127.218556 35.801556 366.803644 
 127.218667 35.801556 365.420424 
 127.218778 35.801556 364.174552 
 127.219000 35.801556 362.111229 
 127.219222 35.801556 360.633534 
 127.219333 35.801556 360.118600 
 127.219444 35.801556 359.753711 
 127.219556 35.801556 359.539747 
 127.218556 35.801556 366.803644 
 127.218667 35.801556 365.420424 
 127.218778 35.801556 364.174552 
 127.218889 35.801556 363.071157 
 127.219111 35.801556 361.298521 
 127.219333 35.801556 360.118600 
 127.219444 35.801556 359.753711 
 127.219556 35.801556 359.539747 
 127.219667 35.801556 359.476183 
 127.218556 35.801667 367.893182 
 127.218667 35.801667 366.486386 
 127.218778 35.801667 365.215954 
 127.218889 35.801667 364.087112 
 127.219111 35.801667 362.261087 
 127.219333 35.801667 361.024906 
 127.219444 35.801667 360.630963 
 127.219556 35.801667 360.387450 
 127.219667 35.801667 360.293861 
 127.218556 35.801778 368.909352 
 127.218667 35.801778 367.478706 
 127.218778 35.801778 366.183467 
 127.218889 35.801778 365.028959 
 127.219111 35.801778 363.149194 
 127.219333 35.801778 361.856518 
 127.219444 35.801778 361.433448 
 127.219556 35.801778 361.160339 
 127.219667 35.801778 361.036710 
 127.218556 35.801889 369.855094 
 127.218667 35.801889 368.400254 
 127.218778 35.801889 367.079889 
 127.218889 35.801889 365.899422 
 127.219111 35.801889 363.965409 
 127.219333 35.801889 362.615836 
 127.219444 35.801889 362.163478 
 127.219556 35.801889 361.860643 
 127.219667 35.801889 361.706869 
 127.218667 35.801889 368.400254 
 127.218778 35.801889 367.079889 
 127.218889 35.801889 365.899422 
 127.219000 35.801889 364.859905 
 127.219222 35.801889 363.216499 
 127.219444 35.801889 362.163478 
 127.219556 35.801889 361.860643 
 127.219667 35.801889 361.706869 
 127.219778 35.801889 361.701915 
 127.218667 35.802000 369.247369 
 127.218778 35.802000 367.901657 
 127.218889 35.802000 366.695039 
 127.219000 35.802000 365.628590 
 127.219222 35.802000 363.929309 
 127.219444 35.802000 362.818148 
 127.219556 35.802000 362.485573 
 127.219667 35.802000 362.301670 
 127.219778 35.802000 362.266313 
 127.218667 35.802111 370.022517 
 127.218778 35.802111 368.651163 
 127.218889 35.802111 367.418127 
 127.219000 35.802111 366.324503 
 127.219222 35.802111 364.568949 
 127.219444 35.802111 363.399362 
 127.219556 35.802111 363.036945 
 127.219667 35.802111 362.822842 
 127.219778 35.802111 362.757038 
 127.218778 35.802111 368.651163 
 127.218889 35.802111 367.418127 
 127.219000 35.802111 366.324503 
 127.219111 35.802111 365.374574 
 127.219333 35.802111 363.910511 
 127.219556 35.802111 363.036945 
 127.219667 35.802111 362.822842 
 127.219778 35.802111 362.757038 
 127.219889 35.802111 362.838583 
 127.218778 35.802222 369.325445 
 127.218889 35.802222 368.065826 
 127.219000 35.802222 366.944895 
 127.219111 35.802222 365.967039 
 127.219333 35.802222 364.445444 
 127.219556 35.802222 363.512582 
 127.219667 35.802222 363.268324 
 127.219778 35.802222 363.172151 
 127.219889 35.802222 363.223129 
 127.218778 35.802333 369.926484 
 127.218889 35.802333 368.640042 
 127.219000 35.802333 367.491589 
 127.219111 35.802333 366.485622 
 127.219333 35.802333 364.906212 
 127.219556 35.802333 363.913885 
 127.219667 35.802333 363.639434 
 127.219778 35.802333 363.512878 
 127.219889 35.802333 363.533306 
 127.218889 35.802333 368.640042 
 127.219000 35.802333 367.491589 
 127.219111 35.802333 366.485622 
 127.219222 35.802333 365.622795 
 127.219444 35.802333 364.336018
[truncated: 1,105,925 more chars]
