# Supplementary material for: Terrain Referenced Navigation Using a Multilayer Radial Basis Function-Based Extreme Learning Machine
Source: Hindawi journal article supplement (doi:10.1155/2019/9142694), 2019-07-11
Supplement: f1 [file 9142694.f1.zip › 9142694_Supplementary information files/TrainDB_ML_RBF_ELM_Using AE2_180919/DEM_RBFN_ELM_Lambda0.15_RegulationMode3.dat]

30.000000 80.708192 81.027843 1.146006 0.000008 
 60.000000 87.444382 88.181048 2.007503 0.000007 
 90.000000 90.491738 91.312067 2.843409 0.000008 
 120.000000 92.022422 93.149303 3.770216 0.000008 
 150.000000 92.867823 94.210157 4.669812 0.000009 
 180.000000 93.443987 94.902565 5.471776 0.000009 
 210.000000 93.911203 95.447471 6.402594 0.000009 
 240.000000 94.280030 95.800067 7.257722 0.000009 
 270.000000 94.623321 96.342540 8.298894 0.000011 
 300.000000 94.797331 96.449621 9.196573 0.000011 
 330.000000 95.189088 96.829060 10.059153 0.000012 
 360.000000 95.270732 96.802975 7.567380 0.000012 
 390.000000 95.665693 96.947117 11.854383 0.000012 
 420.000000 95.666193 97.065618 12.745005 0.000013 
 450.000000 95.794364 96.945748 12.638750 0.000013 
 480.000000 96.039435 96.948305 14.493896 0.000014 
 510.000000 96.113389 97.170238 10.718608 0.000014 
 540.000000 96.190095 96.997969 16.438308 0.000015 
 570.000000 96.362348 97.096262 17.284518 0.000015 
 600.000000 96.611153 97.089437 12.251362 0.000014 
 630.000000 96.650973 97.216711 10.991456 0.000015 
 660.000000 96.836425 97.158577 16.677975 0.000015 
 690.000000 96.897990 97.158734 20.770092 0.000015 
 720.000000 96.946669 97.184147 21.975465 0.000016 
 750.000000 97.106697 97.312825 22.809554 0.000016 
 780.000000 97.219338 97.252286 14.132622 0.000016 
 810.000000 97.315018 97.369240 18.187227 0.000017 
 840.000000 97.301443 97.367793 23.111312 0.000017 
 870.000000 97.293591 97.313812 18.341726 0.000016 
 900.000000 97.463476 97.378639 19.845097 0.000017 
 930.000000 97.503584 97.351906 23.642281 0.000018 
 960.000000 97.532772 97.402311 29.934081 0.000017 
 990.000000 97.614988 97.451689 15.662154 0.000019 
 1020.000000 97.576785 97.429607 24.567456 0.000018 
 1050.000000 97.660847 97.522867 20.247874 0.000019 
 1080.000000 97.711602 97.594954 24.700869 0.000020 
 1110.000000 97.751638 97.536061 18.101000 0.000018 
 1140.000000 97.752032 97.458587 21.148172 0.000018 
 1170.000000 97.764742 97.539125 19.958566 0.000020 
 1200.000000 97.832489 97.571663 23.928117 0.000021 
 1230.000000 97.850811 97.567871 21.464253 0.000020 
 1260.000000 97.884289 97.710452 29.878715 0.000020 
 1290.000000 97.887781 97.660380 19.821354 0.000021 
 1320.000000 97.881037 97.639226 20.985164 0.000021 
 1350.000000 97.946577 97.703826 20.168868 0.000022 
 1380.000000 97.972086 97.726410 22.750554 0.000021 
 1410.000000 97.951208 97.702297 22.842692 0.000020 
 1440.000000 98.017274 97.673376 22.559628 0.000022 
 1470.000000 98.032897 97.762339 27.077307 0.000021 
 1500.000000 98.053795 97.748764 28.139442 0.000023 
 1530.000000 98.041773 97.705555 18.922337 0.000022 
 1560.000000 98.038875 97.718529 21.327857 0.000022 
 1590.000000 98.103424 97.788594 21.667456 0.000022 
 1620.000000 98.097180 97.764080 22.202940 0.000023 
 1650.000000 98.158585 97.809981 23.845306 0.000023 
 1680.000000 98.194404 97.947448 31.402418 0.000023 
 1710.000000 98.129005 97.801911 25.881888 0.000022 
 1740.000000 98.193916 97.855233 21.305184 0.000023 
 1770.000000 98.197512 97.910691 21.706596 0.000023 
 1800.000000 98.203440 97.859677 22.813579 0.000025 
 1830.000000 98.233531 97.913573 27.667825 0.000024 
 1860.000000 98.265258 97.949263 25.830090 0.000024 
 1890.000000 98.287349 98.080145 26.514433 0.000025 
 1920.000000 98.279752 97.967797 25.858235 0.000026 
 1950.000000 98.310886 98.057918 25.180973 0.000026 
 1980.000000 98.300839 98.016509 26.198838 0.000026 
 2010.000000 98.331715 98.118832 26.962484 0.000025 
 2040.000000 98.348008 98.105713 28.028049 0.000026 
 2070.000000 98.360098 98.146075 26.928751 0.000027 
 2100.000000 98.364517 98.116528 28.178684 0.000028 
 2130.000000 98.364755 98.140244 31.485274 0.000027 
 2160.000000 98.396703 98.204691 28.900480 0.000028 
 2190.000000 98.412229 98.134020 29.275970 0.000029 
 2220.000000 98.388269 98.146123 35.041649 0.000029 
 2250.000000 98.455520 98.330294 33.007008 0.000028 
 2280.000000 98.442450 98.261217 29.906354 0.000030 
 2310.000000 98.448581 98.261436 31.852593 0.000032 
 2340.000000 98.453315 98.247403 32.610033 0.000029 
 2370.000000 98.441380 98.232092 31.962612 0.000031 
 2400.000000 98.486165 98.304217 35.668802 0.000030 
 
