# Supplementary material for: Terrain Referenced Navigation Using a Multilayer Radial Basis Function-Based Extreme Learning Machine
Source: Hindawi journal article supplement (doi:10.1155/2019/9142694), 2019-07-11
Supplement: f1 [file 9142694.f1.zip › 9142694_Supplementary information files/TrainDB_ML_RBF_ELM_Using AE2_180919/DEM_RBFN_ELM_Lambda0.25_RegulationMode3.dat]

30.000000 82.046749 82.522389 1.114859 0.000007 
 60.000000 87.834486 88.483242 2.065448 0.000007 
 90.000000 89.640253 90.311025 2.892738 0.000008 
 120.000000 92.360611 93.407398 3.802442 0.000010 
 150.000000 93.087807 94.287767 4.680646 0.000009 
 180.000000 93.571880 95.000112 5.585691 0.000009 
 210.000000 93.833416 95.345486 6.456107 0.000009 
 240.000000 94.469518 96.224392 7.375428 0.000009 
 270.000000 94.627231 96.289156 8.319933 0.000012 
 300.000000 94.753415 96.437608 9.221637 0.000011 
 330.000000 95.097628 96.802423 10.142346 0.000012 
 360.000000 95.353160 96.860294 10.417798 0.000012 
 390.000000 95.421926 96.906580 12.015784 0.000013 
 420.000000 95.626700 96.966383 12.508802 0.000013 
 450.000000 95.811876 96.942938 12.027664 0.000013 
 480.000000 96.010882 97.136754 10.377138 0.000013 
 510.000000 96.094013 97.008224 8.274275 0.000013 
 540.000000 96.218549 97.094990 14.074538 0.000015 
 570.000000 96.447905 97.028926 10.237740 0.000015 
 600.000000 96.342105 96.989876 15.904799 0.000015 
 630.000000 96.700290 97.202315 13.893839 0.000015 
 660.000000 96.795182 97.191397 15.568299 0.000014 
 690.000000 96.890400 97.158823 18.080133 0.000016 
 720.000000 96.795770 97.201308 21.013833 0.000016 
 750.000000 97.107062 97.216141 22.938411 0.000016 
 780.000000 97.124063 97.260187 20.214278 0.000016 
 810.000000 97.269942 97.305038 18.125164 0.000016 
 840.000000 97.269730 97.329189 14.771902 0.000017 
 870.000000 97.330611 97.302942 24.870589 0.000017 
 900.000000 97.504210 97.438397 17.246162 0.000017 
 930.000000 97.564279 97.450876 19.514492 0.000017 
 960.000000 97.575081 97.401400 23.458784 0.000018 
 990.000000 97.572615 97.401677 20.680111 0.000018 
 1020.000000 97.623388 97.458433 18.525753 0.000018 
 1050.000000 97.672290 97.505582 19.739827 0.000019 
 1080.000000 97.669459 97.462576 20.667366 0.000019 
 1110.000000 97.691773 97.553669 19.521877 0.000019 
 1140.000000 97.742505 97.506957 24.847921 0.000019 
 1170.000000 97.820070 97.573117 21.743800 0.000020 
 1200.000000 97.803648 97.559205 21.933928 0.000020 
 1230.000000 97.815707 97.573952 20.743243 0.000021 
 1260.000000 97.905821 97.687374 26.469360 0.000020 
 1290.000000 97.870828 97.633167 21.496819 0.000020 
 1320.000000 97.905509 97.639580 25.390857 0.000021 
 1350.000000 97.966695 97.727166 21.268133 0.000021 
 1380.000000 97.930894 97.617042 18.278692 0.000021 
 1410.000000 97.945329 97.655064 29.108633 0.000021 
 1440.000000 97.980835 97.709147 23.413042 0.000023 
 1470.000000 98.048999 97.738682 25.201288 0.000022 
 1500.000000 98.035653 97.743444 20.924158 0.000023 
 1530.000000 98.112854 97.824957 20.143184 0.000022 
 1560.000000 98.104622 97.811570 23.806418 0.000022 
 1590.000000 98.092113 97.750664 23.914641 0.000023 
 1620.000000 98.149582 97.874720 22.189690 0.000023 
 1650.000000 98.126399 97.849618 23.395791 0.000023 
 1680.000000 98.171967 97.877410 22.391961 0.000024 
 1710.000000 98.156429 97.877650 22.443662 0.000023 
 1740.000000 98.214341 97.914015 31.841825 0.000024 
 1770.000000 98.183511 97.905965 23.106613 0.000023 
 1800.000000 98.224433 97.943957 25.561872 0.000024 
 1830.000000 98.224983 98.009690 27.876792 0.000025 
 1860.000000 98.241752 97.954062 25.762874 0.000024 
 1890.000000 98.245646 97.944111 25.328092 0.000025 
 1920.000000 98.275730 98.065852 27.661204 0.000024 
 1950.000000 98.291280 97.954602 29.969738 0.000024 
 1980.000000 98.294331 97.991131 26.095471 0.000024 
 2010.000000 98.310976 98.060135 26.883207 0.000026 
 2040.000000 98.365026 98.153526 30.837080 0.000025 
 2070.000000 98.364201 98.175666 33.125135 0.000027 
 2100.000000 98.374889 98.196534 25.720391 0.000027 
 2130.000000 98.357782 98.105827 28.645724 0.000028 
 2160.000000 98.369842 98.150759 34.082793 0.000027 
 2190.000000 98.415285 98.206108 28.829628 0.000028 
 2220.000000 98.412846 98.247525 35.176335 0.000028 
 2250.000000 98.408916 98.153336 32.648899 0.000029 
 2280.000000 98.447372 98.277202 33.755794 0.000028 
 2310.000000 98.464039 98.250248 31.098738 0.000028 
 2340.000000 98.467721 98.297115 33.222949 0.000029 
 2370.000000 98.486217 98.300725 33.435021 0.000029 
 2400.000000 98.470108 98.232198 36.734387 0.000029 
 
