# Supplementary material for: Terrain Referenced Navigation Using a Multilayer Radial Basis Function-Based Extreme Learning Machine
Source: Hindawi journal article supplement (doi:10.1155/2019/9142694), 2019-07-11
Supplement: f1 [file 9142694.f1.zip › 9142694_Supplementary information files/TrainDB_ML_RBF_ELM_Using AE2_180919/Evaluation_CIW_ML_ELM/TestDBData2.dat]

-0.987245 -1.000000 0.294776 
 -0.987245 -0.999418 0.309701 
 -0.987245 -0.998837 0.324627 
 -0.985969 -0.998837 0.309701 
 -0.985969 -0.998255 0.339552 
 -0.985969 -0.997674 0.354478 
 -0.985969 -0.997092 0.373134 
 -0.984694 -0.997092 0.361940 
 -0.984694 -0.996511 0.365672 
 -0.984694 -0.995929 0.365672 
 -0.984694 -0.995347 0.358209 
 -0.983418 -0.995347 0.335821 
 -0.983418 -0.994766 0.332090 
 -0.983418 -0.994184 0.328358 
 -0.983418 -0.993603 0.328358 
 -0.982143 -0.993021 0.305970 
 -0.982143 -0.992440 0.298507 
 -0.982143 -0.991858 0.283582 
 -0.982143 -0.991277 0.279851 
 -0.980867 -0.991277 0.261194 
 -0.980867 -0.990695 0.253731 
 -0.980867 -0.990113 0.272388 
 -0.980867 -0.989532 0.291045 
 -0.979592 -0.989532 0.291045 
 -0.979592 -0.988950 0.302239 
 -0.979592 -0.988369 0.305970 
 -0.979592 -0.987787 0.302239 
 -0.978316 -0.987787 0.309701 
 -0.978316 -0.987206 0.309701 
 -0.978316 -0.986624 0.302239 
 -0.978316 -0.986042 0.291045 
 -0.977041 -0.986042 0.291045 
 -0.977041 -0.985461 0.276119 
 -0.977041 -0.984879 0.257463 
 -0.977041 -0.984298 0.235075 
 -0.975765 -0.984298 0.216418 
 -0.975765 -0.983716 0.197761 
 -0.975765 -0.983135 0.167910 
 -0.975765 -0.982553 0.152985 
 -0.974490 -0.982553 0.141791 
 -0.974490 -0.981972 0.126866 
 -0.974490 -0.981390 0.119403 
 -0.974490 -0.980808 0.104478 
 -0.973214 -0.980808 0.082090 
 -0.973214 -0.980227 0.089552 
 -0.973214 -0.979645 0.126866 
 -0.973214 -0.979064 0.152985 
 -0.971939 -0.979064 0.145522 
 -0.971939 -0.978482 0.164179 
 -0.971939 -0.977901 0.160448 
 -0.971939 -0.977319 0.138060 
 -0.970663 -0.977319 0.130597 
 -0.970663 -0.976737 0.097015 
 -0.970663 -0.976156 0.074627 
 -0.970663 -0.975574 0.041045 
 -0.969388 -0.975574 0.033582 
 -0.969388 -0.974993 0.014925 
 -0.969388 -0.974411 0.018657 
 -0.969388 -0.973830 0.044776 
 -0.968112 -0.973830 0.029851 
 -0.968112 -0.973248 0.055970 
 -0.968112 -0.972666 0.070896 
 -0.968112 -0.972085 0.078358 
 -0.966837 -0.972085 0.059701 
 -0.966837 -0.971503 0.055970 
 -0.966837 -0.970922 0.033582 
 -0.966837 -0.970340 0.014925 
 -0.965561 -0.970340 0.000000 
 -0.965561 -0.969759 -0.014925 
 -0.965561 -0.969177 -0.014925 
 -0.965561 -0.968596 0.011194 
 -0.964286 -0.968596 0.003731 
 -0.964286 -0.968014 0.022388 
 -0.964286 -0.967432 0.022388 
 -0.964286 -0.966851 0.011194 
 -0.963010 -0.966851 0.003731 
 -0.963010 -0.966269 -0.003731 
 -0.963010 -0.965688 -0.011194 
 -0.963010 -0.965106 0.003731 
 -0.961735 -0.965106 -0.003731 
 -0.961735 -0.964525 0.029851 
 -0.961735 -0.963943 0.048507 
 -0.961735 -0.963361 0.085821 
 -0.960459 -0.963361 0.089552 
 -0.960459 -0.962780 0.111940 
 -0.960459 -0.962198 0.138060 
 -0.960459 -0.961617 0.149254 
 -0.959184 -0.961617 0.134328 
 -0.959184 -0.961035 0.134328 
 -0.959184 -0.960454 0.111940 
 -0.959184 -0.959872 0.085821 
 -0.957908 -0.959872 0.078358 
 -0.957908 -0.959290 0.029851 
 -0.957908 -0.958709 0.011194 
 -0.956633 -0.958709 0.000000 
 -0.956633 -0.958127 0.011194 
 -0.956633 -0.957546 0.029851 
 -0.956633 -0.956964 0.055970 
 -0.955357 -0.956964 0.026119 
 -0.955357 -0.956383 0.041045 
 -0.955357 -0.955801 0.055970 
 -0.955357 -0.955220 0.067164 
 -0.954082 -0.955220 0.041045 
 -0.954082 -0.954638 0.055970 
 -0.954082 -0.954056 0.055970 
 -0.954082 -0.953475 0.048507 
 -0.952806 -0.953475 0.029851 
 -0.952806 -0.952893 0.026119 
 -0.952806 -0.952312 0.022388 
 -0.952806 -0.951730 0.022388 
 -0.951531 -0.951730 0.003731 
 -0.951531 -0.951149 0.007463 
 -0.951531 -0.950567 0.018657 
 -0.951531 -0.949985 0.029851 
 -0.950255 -0.949985 0.011194 
 -0.950255 -0.949404 0.033582 
 -0.950255 -0.948822 0.044776 
 -0.950255 -0.948241 0.037313 
 -0.948980 -0.948241 0.033582 
 -0.948980 -0.947659 0.018657 
 -0.948980 -0.947078 -0.003731 
 -0.948980 -0.946496 -0.033582 
 -0.947704 -0.946496 -0.033582 
 -0.947704 -0.945915 -0.082090 
 -0.947704 -0.945333 -0.104478 
 -0.946429 -0.944751 -0.130597 
 -0.946429 -0.944170 -0.130597 
 -0.946429 -0.943588 -0.123134 
 -0.945153 -0.943588 -0.134328 
 -0.945153 -0.943007 -0.115672 
 -0.945153 -0.942425 -0.097015 
 -0.945153 -0.941844 -0.067164 
 -0.943878 -0.941844 -0.085821 
 -0.943878 -0.941262 -0.067164 
 -0.943878 -0.940680 -0.048507 
 -0.943878 -0.940099 -0.041045 
 -0.942602 -0.940099 -0.063433 
 -0.942602 -0.939517 -0.070896 
 -0.942602 -0.938936 -0.082090 
 -0.942602 -0.938354 -0.100746 
 -0.941327 -0.938354 -0.115672 
 -0.941327 -0.937773 -0.134328 
 -0.941327 -0.937191 -0.164179 
 -0.941327 -0.936609 -0.182836 
 -0.940051 -0.936609 -0.201493 
 -0.940051 -0.936028 -0.246269 
 -0.940051 -0.935446 -0.261194 
 -0.938776 -0.935446 -0.272388 
 -0.938776 -0.934865 -0.276119 
 -0.938776 -0.934283 -0.287313 
 -0.938776 -0.933702 -0.287313 
 -0.937500 -0.933702 -0.287313 
 -0.937500 -0.933120 -0.287313 
 -0.937500 -0.932539 -0.291045 
 -0.937500 -0.931957 -0.291045 
 -0.936224 -0.931957 -0.291045 
 -0.936224 -0.931375 -0.291045 
 -0.936224 -0.930794 -0.291045 
 -0.936224 -0.930212 -0.294776 
 -0.934949 -0.930212 -0.291045 
 -0.934949 -0.929631 -0.294776 
 -0.934949 -0.929049 -0.298507 
 -0.933673 -0.929049 -0.294776 
 -0.933673 -0.928468 -0.294776 
 -0.933673 -0.927886 -0.294776 
 -0.933673 -0.927304 -0.294776 
 -0.932398 -0.927304 -0.294776 
 -0.932398 -0.926723 -0.294776 
 -0.932398 -0.926141 -0.294776 
 -0.932398 -0.925560 -0.302239 
 -0.931122 -0.925560 -0.302239 
 -0.931122 -0.924978 -0.305970 
 -0.931122 -0.924397 -0.305970 
 -0.929847 -0.924397 -0.305970 
 -0.929847 -0.923815 -0.305970 
 -0.929847 -0.923233 -0.305970 
 -0.929847 -0.922652 -0.305970 
 -0.928571 -0.922652 -0.305970 
 -0.928571 -0.922070 -0.305970 
 -0.928571 -0.921489 -0.302239 
 -0.928571 -0.920907 -0.302239 
 -0.927296 -0.920907 -0.302239 
 -0.927296 -0.920326 -0.302239 
 -0.927296 -0.919744 -0.298507 
 -0.926020 -0.919744 -0.298507 
 -0.926020 -0.919163 -0.294776 
 -0.926020 -0.918581 -0.291045 
 -0.926020 -0.917999 -0.291045 
 -0.924745 -0.917999 -0.291045 
 -0.924745 -0.917418 -0.291045 
 -0.924745 -0.916836 -0.283582 
 -0.924745 -0.916255 -0.279851 
 -0.923469 -0.916255 -0.279851 
 -0.923469 -0.915673 -0.272388 
 -0.923469 -0.915092 -0.264925 
 -0.922194 -0.915092 -0.268657 
 -0.922194 -0.914510 -0.264925 
 -0.922194 -0.913928 -0.257463 
 -0.922194 -0.913347 -0.253731 
 -0.920918 -0.913347 -0.257463 
 -0.920918 -0.912765 -0.257463 
 -0.920918 -0.912184 -0.253731 
 -0.920918 -0.911602 -0.253731 
 -0.919643 -0.911602 -0.257463 
 -0.919643 -0.911021 -0.253731 
 -0.919643 -0.910439 -0.250000 
 -0.918367 -0.910439 -0.253731 
 -0.918367 -0.909858 -0.246269 
 -0.918367 -0.909276 -0.246269 
 -0.918367 -0.908694 -0.242537 
 -0.917092 -0.908694 -0.246269 
 -0.917092 -0.908113 -0.242537 
 -0.917092 -0.907531 -0.242537 
 -0.915816 -0.907531 -0.250000 
 -0.915816 -0.906950 -0.246269 
 -0.915816 -0.906368 -0.242537 
 -0.915816 -0.905787 -0.238806 
 -0.914541 -0.905787 -0.242537 
 -0.914541 -0.905205 -0.238806 
 -0.914541 -0.904623 -0.238806 
 -0.913265 -0.904623 -0.242537 
 -0.913265 -0.904042 -0.238806 
 -0.913265 -0.903460 -0.238806 
 -0.913265 -0.902879 -0.235075 
 -0.911990 -0.902879 -0.238806 
 -0.911990 -0.902297 -0.235075 
 -0.911990 -0.901716 -0.231343 
 -0.910714 -0.901134 -0.231343 
 -0.910714 -0.900552 -0.227612 
 -0.910714 -0.899971 -0.223881 
 -0.909439 -0.899971 -0.227612 
 -0.909439 -0.899389 -0.223881 
 -0.909439 -0.898808 -0.220149 
 -0.908163 -0.898226 -0.216418 
 -0.908163 -0.897645 -0.216418 
 -0.908163 -0.897063 -0.212687 
 -0.906888 -0.897063 -0.212687 
 -0.906888 -0.896482 -0.216418 
 -0.906888 -0.895900 -0.212687 
 -0.906888 -0.895318 -0.212687 
 -0.905612 -0.895318 -0.212687 
 -0.905612 -0.894737 -0.208955 
 -0.905612 -0.894155 -0.201493 
 -0.904337 -0.894155 -0.208955 
 -0.904337 -0.893574 -0.201493 
 -0.904337 -0.892992 -0.194030 
 -0.903061 -0.892992 -0.201493 
 -0.903061 -0.892411 -0.194030 
 -0.903061 -0.891829 -0.194030 
 -0.903061 -0.891247 -0.190299 
 -0.901786 -0.891247 -0.194030 
 -0.901786 -0.890666 -0.190299 
 -0.901786 -0.890084 -0.190299 
 -0.900510 -0.890084 -0.194030 
 -0.900510 -0.889503 -0.182836 
 -0.900510 -0.888921 -0.179104 
 -0.900510 -0.888340 -0.175373 
 -0.899235 -0.888340 -0.171642 
 -0.899235 -0.887758 -0.171642 
 -0.899235 -0.887177 -0.156716 
 -0.897959 -0.887177 -0.156716 
 -0.897959 -0.886595 -0.156716 
 -0.897959 -0.886013 -0.156716 
 -0.897959 -0.885432 -0.149254 
 -0.896684 -0.885432 -0.152985 
 -0.896684 -0.884850 -0.138060 
 -0.896684 -0.884269 -0.130597 
 -0.895408 -0.884269 -0.138060 
 -0.895408 -0.883687 -0.130597 
 -0.895408 -0.883106 -0.119403 
 -0.895408 -0.882524 -0.119403 
 -0.894133 -0.882524 -0.119403 
 -0.894133 -0.881942 -0.119403 
 -0.894133 -0.881361 -0.111940 
 -0.892857 -0.881361 -0.085821 
 -0.892857 -0.880779 -0.078358 
 -0.892857 -0.880198 -0.078358 
 -0.891582 -0.880198 -0.059701 
 -0.891582 -0.879616 -0.048507 
 -0.891582 -0.879035 -0.044776 
 -0.891582 -0.878453 -0.037313 
 -0.890306 -0.878453 -0.029851 
 -0.890306 -0.877871 -0.026119 
 -0.890306 -0.877290 -0.018657 
 -0.889031 -0.877290 -0.003731 
 -0.889031 -0.876708 -0.003731 
 -0.889031 -0.876127 -0.003731 
 -0.887755 -0.875545 0.007463 
 -0.887755 -0.874964 0.000000 
 -0.887755 -0.874382 0.000000 
 -0.886480 -0.874382 0.011194 
 -0.886480 -0.873801 0.007463 
 -0.886480 -0.873219 0.007463 
 -0.885204 -0.873219 0.022388 
 -0.885204 -0.872637 0.022388 
 -0.885204 -0.872056 0.037313 
 -0.885204 -0.871474 0.044776 
 -0.883929 -0.871474 0.059701 
 -0.883929 -0.870893 0.067164 
 -0.883929 -0.870311 0.078358 
 -0.882653 -0.870311 0.100746 
 -0.882653 -0.869730 0.111940 
 -0.882653 -0.869148 0.108209 
 -0.881378 -0.869148 0.138060 
 -0.881378 -0.868566 0.145522 
 -0.881378 -0.867985 0.149254 
 -0.881378 -0.867403 0.152985 
 -0.880102 -0.867403 0.182836 
 -0.880102 -0.866822 0.186567 
 -0.880102 -0.866240 0.190299 
 -0.878827 -0.866240 0.216418 
 -0.878827 -0.865659 0.220149 
 -0.878827 -0.865077 0.223881 
 -0.877551 -0.865077 0.246269 
 -0.877551 -0.864495 0.246269 
 -0.877551 -0.863914 0.250000 
 -0.877551 -0.863332 0.250000 
 -0.876276 -0.863332 0.272388 
 -0.876276 -0.862751 0.276119 
 -0.876276 -0.862169 0.283582 
 -0.875000 -0.862169 0.302239 
 -0.875000 -0.861588 0.305970 
 -0.875000 -0.861006 0.313433 
 -0.873724 -0.861006 0.332090 
 -0.873724 -0.860425 0.335821 
 -0.873724 -0.859843 0.339552 
 -0.872449 -0.859843 0.365672 
 -0.872449 -0.859261 0.365672 
 -0.872449 -0.858680 0.373134 
 -0.872449 -0.858098 0.376866 
 -0.871173 -0.858098 0.395522 
 -0.871173 -0.857517 0.399254 
 -0.871173 -0.856935 0.399254 
 -0.869898 -0.856935 0.425373 
 -0.869898 -0.856354 0.425373 
 -0.869898 -0.855772 0.421642 
 -0.868622 -0.855772 0.455224 
 -0.868622 -0.855190 0.455224 
 -0.868622 -0.854609 0.462687 
 -0.868622 -0.854027 0.473881 
 -0.867347 -0.854027 0.507463 
 -0.867347 -0.853446 0.522388 
 -0.867347 -0.852864 0.544776 
 -0.866071 -0.852864 0.555970 
 -0.866071 -0.852283 0.585821 
 -0.866071 -0.851701 0.611940 
 -0.864796 -0.851701 0.615672 
 -0.864796 -0.851120 0.652985 
 -0.864796 -0.850538 0.679104 
 -0.863520 -0.850538 0.679104 
 -0.863520 -0.849956 0.723881 
 -0.863520 -0.849375 0.738806 
 -0.863520 -0.848793 0.761194 
 -0.862245 -0.848793 0.768657 
 -0.862245 -0.848212 0.783582 
 -0.862245 -0.847630 0.794776 
 -0.860969 -0.847630 0.809701 
 -0.860969 -0.847049 0.805970 
 -0.860969 -0.846467 0.802239 
 -0.859694 -0.846467 0.817164 
 -0.859694 -0.845885 0.805970 
 -0.859694 -0.845304 0.798507 
 -0.858418 -0.845304 0.813433 
 -0.858418 -0.844722 0.791045 
 -0.858418 -0.844141 0.772388 
 -0.858418 -0.843559 0.746269 
 -0.857143 -0.843559 0.742537 
 -0.857143 -0.842978 0.723881 
 -0.857143 -0.842396 0.694030 
 -0.855867 -0.842396 0.679104 
 -0.855867 -0.841814 0.652985 
 -0.855867 -0.841233 0.619403 
 -0.854592 -0.841233 0.608209 
 -0.854592 -0.840651 0.593284 
 -0.854592 -0.840070 0.567164 
 -0.853316 -0.840070 0.552239 
 -0.853316 -0.839488 0.533582 
 -0.853316 -0.838907 0.514925 
 -0.852041 -0.838907 0.507463 
 -0.852041 -0.838325 0.492537 
 -0.852041 -0.837744 0.477612 
 -0.852041 -0.837162 0.458955 
 -0.850765 -0.837162 0.455224 
 -0.850765 -0.836580 0.440299 
 -0.850765 -0.835999 0.432836 
 -0.849490 -0.835999 0.451493 
 -0.849490 -0.835417 0.447761 
 -0.849490 -0.834836 0.440299 
 -0.848214 -0.834836 0.466418 
 -0.848214 -0.834254 0.458955 
 -0.848214 -0.833673 0.451493 
 -0.846939 -0.833673 0.473881 
 -0.846939 -0.833091 0.462687 
 -0.846939 -0.832509 0.444030 
 -0.845663 -0.832509 0.462687 
 -0.845663 -0.831928 0.447761 
 -0.845663 -0.831346 0.432836 
 -0.844388 -0.830765 0.444030 
 -0.844388 -0.830183 0.455224 
 -0.844388 -0.829602 0.458955 
 -0.843112 -0.829602 0.473881 
 -0.843112 -0.829020 0.485075 
 -0.843112 -0.828438 0.496269 
 -0.841837 -0.828438 0.511194 
 -0.841837 -0.827857 0.522388 
 -0.841837 -0.827275 0.529851 
 -0.840561 -0.827275 0.544776 
 -0.840561 -0.826694 0.544776 
 -0.840561 -0.826112 0.552239 
 -0.839286 -0.826112 0.574627 
 -0.839286 -0.825531 0.582090 
 -0.839286 -0.824949 0.589552 
 -0.838010 -0.824949 0.608209 
 -0.838010 -0.824368 0.611940 
 -0.838010 -0.823786 0.630597 
 -0.836735 -0.823786 0.645522 
 -0.836735 -0.823204 0.645522 
 -0.836735 -0.822623 0.664179 
 -0.836735 -0.822041 0.675373 
 -0.835459 -0.822041 0.645522 
 -0.835459 -0.821460 0.649254 
 -0.835459 -0.820878 0.641791 
 -0.834184 -0.820878 0.604478 
 -0.834184 -0.820297 0.578358 
 -0.834184 -0.819715 0.552239 
 -0.832908 -0.819715 0.518657 
 -0.832908 -0.819133 0.485075 
 -0.832908 -0.818552 0.432836 
 -0.831633 -0.818552 0.402985 
 -0.831633 -0.817970 0.380597 
 -0.831633 -0.817389 0.350746 
 -0.830357 -0.817389 0.324627 
 -0.830357 -0.816807 0.313433 
 -0.830357 -0.816226 0.298507 
 -0.829082 -0.816226 0.272388 
 -0.829082 -0.815644 0.268657 
 -0.829082 -0.815063 0.294776 
 -0.827806 -0.815063 0.283582 
 -0.827806 -0.814481 0.305970 
 -0.827806 -0.813899 0.339552 
 -0.827806 -0.813318 0.361940 
 -0.826531 -0.813318 0.354478 
 -0.826531 -0.812736 0.361940 
 -0.826531 -0.812155 0.354478 
 -0.825255 -0.812155 0.324627 
 -0.825255 -0.811573 0.309701 
 -0.825255 -0.810992 0.309701 
 -0.823980 -0.810992 0.272388 
 -0.823980 -0.810410 0.283582 
 -0.823980 -0.809828 0.313433 
 -0.822704 -0.809828 0.305970 
 -0.822704 -0.809247 0.339552 
 -0.822704 -0.808665 0.391791 
 -0.821429 -0.808665 0.388060 
 -0.821429 -0.808084 0.432836 
 -0.821429 -0.807502 0.473881 
 -0.820153 -0.807502 0.458955 
 -0.820153 -0.806921 0.485075 
 -0.820153 -0.806339 0.507463 
 -0.818878 -0.806339 0.485075 
 -0.818878 -0.805757 0.473881 
 -0.818878 -0.805176 0.451493 
 -0.817602 -0.805176 0.425373 
 -0.817602 -0.804594 0.399254 
 -0.817602 -0.804013 0.358209 
 -0.816327 -0.803431 0.309701 
 -0.816327 -0.802850 0.305970 
 -0.816327 -0.802268 0.317164 
 -0.815051 -0.802268 0.294776 
 -0.815051 -0.801687 0.317164 
 -0.815051 -0.801105 0.354478 
 -0.813776 -0.801105 0.335821 
 -0.813776 -0.800523 0.376866 
 -0.813776 -0.799942 0.447761 
 -0.812500 -0.799942 0.425373 
 -0.812500 -0.799360 0.447761 
 -0.812500 -0.798779 0.436567 
 -0.811224 -0.798779 0.395522 
 -0.811224 -0.798197 0.395522 
 -0.811224 -0.797616 0.410448 
 -0.809949 -0.797616 0.380597 
 -0.809949 -0.797034 0.391791 
 -0.809949 -0.796452 0.410448 
 -0.808673 -0.796452 0.380597 
 -0.808673 -0.795871 0.391791 
 -0.808673 -0.795289 0.414179 
 -0.807398 -0.795289 0.388060 
 -0.807398 -0.794708 0.410448 
 -0.807398 -0.794126 0.436567 
 -0.806122 -0.794126 0.414179 
 -0.806122 -0.793545 0.432836 
 -0.806122 -0.792963 0.455224 
 -0.804847 -0.792963 0.429104 
 -0.804847 -0.792382 0.462687 
 -0.804847 -0.791800 0.496269 
 -0.803571 -0.791800 0.455224 
 -0.803571 -0.791218 0.529851 
 -0.803571 -0.790637 0.630597 
 -0.802296 -0.790637 0.555970 
 -0.802296 -0.790055 0.652985 
 -0.802296 -0.789474 0.682836 
 -0.802296 -0.788892 0.675373 
 -0.801020 -0.788892 0.619403 
 -0.801020 -0.788311 0.611940 
 -0.801020 -0.787729 0.608209 
 -0.799745 -0.787729 0.559701 
 -0.799745 -0.787147 0.570896 
 -0.799745 -0.786566 0.604478 
 -0.798469 -0.786566 0.578358 
 -0.798469 -0.785984 0.604478 
 -0.798469 -0.785403 0.645522 
 -0.797194 -0.785403 0.608209 
 -0.797194 -0.784821 0.619403 
 -0.797194 -0.784240 0.626866 
 -0.795918 -0.784240 0.589552 
 -0.795918 -0.783658 0.611940 
 -0.795918 -0.783076 0.634328 
 -0.794643 -0.783076 0.604478 
 -0.794643 -0.782495 0.638060 
 -0.794643 -0.781913 0.667910 
 -0.793367 -0.781913 0.649254 
 -0.793367 -0.781332 0.671642 
 -0.793367 -0.780750 0.667910 
 -0.792092 -0.780750 0.664179 
 -0.792092 -0.780169 0.652985 
 -0.792092 -0.779587 0.638060 
 -0.790816 -0.779587 0.641791 
 -0.790816 -0.779006 0.611940 
 -0.790816 -0.778424 0.589552 
 -0.789541 -0.778424 0.597015 
 -0.789541 -0.777842 0.574627 
 -0.789541 -0.777261 0.567164 
 -0.788265 -0.777261 0.570896 
 -0.788265 -0.776679 0.552239 
 -0.788265 -0.776098 0.537313 
 -0.786990 -0.776098 0.541045 
 -0.786990 -0.775516 0.507463 
 -0.786990 -0.774935 0.485075 
 -0.785714 -0.774935 0.492537 
 -0.785714 -0.774353 0.470149 
 -0.785714 -0.773771 0.436567 
 -0.784439 -0.773771 0.451493 
 -0.784439 -0.773190 0.429104 
 -0.784439 -0.772608 0.399254 
 -0.783163 -0.772608 0.414179 
 -0.783163 -0.772027 0.395522 
 -0.783163 -0.771445 0.373134 
 -0.781888 -0.771445 0.388060 
 -0.781888 -0.770864 0.380597 
 -0.781888 -0.770282 0.376866 
 -0.780612 -0.770282 0.402985 
 -0.780612 -0.769700 0.406716 
 -0.780612 -0.769119 0.406716 
 -0.779337 -0.768537 0.436567 
 -0.779337 -0.767956 0.436567 
 -0.779337 -0.767374 0.436567 
 -0.778061 -0.767374 0.447761 
 -0.778061 -0.766793 0.447761 
 -0.778061 -0.766211 0.451493 
 -0.776786 -0.766211 0.470149 
 -0.776786 -0.765630 0.477612 
 -0.776786 -0.765048 0.488806 
 -0.775510 -0.765048 0.503731 
 -0.775510 -0.764466 0.511194 
 -0.775510 -0.763885 0.518657 
 -0.774235 -0.763885 0.514925 
 -0.774235 -0.763303 0.522388 
 -0.774235 -0.762722 0.537313 
 -0.772959 -0.762722 0.511194 
 -0.772959 -0.762140 0.533582 
 -0.772959 -0.761559 0.548507 
 -0.771684 -0.761559 0.533582 
 -0.771684 -0.760977 0.537313 
 -0.771684 -0.760395 0.541045 
 -0.770408 -0.760395 0.507463 
 -0.770408 -0.759814 0.507463 
 -0.770408 -0.759232 0.511194 
 -0.769133 -0.759232 0.466418 
 -0.769133 -0.758651 0.462687 
 -0.769133 -0.758069 0.462687 
 -0.767857 -0.758069 0.417910 
 -0.767857 -0.757488 0.421642 
 -0.767857 -0.756906 0.425373 
 -0.766582 -0.756906 0.395522 
 -0.766582 -0.756325 0.436567 
 -0.766582 -0.755743 0.473881 
 -0.765306 -0.755743 0.455224 
 -0.765306 -0.755161 0.485075 
 -0.765306 -0.754580 0.492537 
 -0.764031 -0.754580 0.458955 
 -0.764031 -0.753998 0.466418 
 -0.764031 -0.753417 0.477612 
 -0.762755 -0.753417 0.451493 
 -0.762755 -0.752835 0.473881 
 -0.762755 -0.752254 0.492537 
 -0.761480 -0.752254 0.466418 
 -0.761480 -0.751672 0.496269 
 -0.761480 -0.751090 0.522388 
 -0.760204 -0.751090 0.511194 
 -0.760204 -0.750509 0.555970 
 -0.760204 -0.749927 0.567164 
 -0.758929 -0.749927 0.544776 
 -0.758929 -0.749346 0.548507 
 -0.758929 -0.748764 0.552239 
 -0.757653 -0.748764 0.544776 
 -0.757653 -0.748183 0.552239 
 -0.757653 -0.747601 0.537313 
 -0.756378 -0.747601 0.537313 
 -0.756378 -0.747019 0.511194 
 -0.756378 -0.746438 0.470149 
 -0.755102 -0.746438 0.466418 
 -0.755102 -0.745856 0.440299 
 -0.755102 -0.745275 0.388060 
 -0.753827 -0.744693 0.347015 
 -0.753827 -0.744112 0.283582 
 -0.753827 -0.743530 0.242537 
 -0.752551 -0.743530 0.238806 
 -0.752551 -0.742949 0.197761 
 -0.752551 -0.742367 0.164179 
 -0.751276 -0.742367 0.186567 
 -0.751276 -0.741785 0.160448 
 -0.751276 -0.741204 0.152985 
 -0.750000 -0.741204 0.190299 
 -0.750000 -0.740622 0.167910 
 -0.750000 -0.740041 0.156716 
 -0.748724 -0.740041 0.194030 
 -0.748724 -0.739459 0.175373 
 -0.748724 -0.738878 0.164179 
 -0.747449 -0.738878 0.197761 
 -0.747449 -0.738296 0.186567 
 -0.747449 -0.737714 0.167910 
 -0.746173 -0.737714 0.197761 
 -0.746173 -0.737133 0.186567 
 -0.746173 -0.736551 0.164179 
 -0.744898 -0.736551 0.190299 
 -0.744898 -0.735970 0.175373 
 -0.744898 -0.735388 0.149254 
 -0.743622 -0.735388 0.171642 
 -0.743622 -0.734807 0.152985 
 -0.743622 -0.734225 0.108209 
 -0.742347 -0.734225 0.126866 
 -0.742347 -0.733644 0.093284 
 -0.742347 -0.733062 0.022388 
 -0.741071 -0.733062 0.033582 
 -0.741071 -0.732480 -0.007463 
 -0.741071 -0.731899 -0.048507 
 -0.739796 -0.731899 -0.018657 
 -0.739796 -0.731317 -0.037313 
 -0.739796 -0.730736 -0.067164 
 -0.738520 -0.730736 -0.037313 
 -0.738520 -0.730154 -0.055970 
 -0.738520 -0.729573 -0.067164 
 -0.737245 -0.729573 -0.055970 
 -0.737245 -0.728991 -0.063433 
 -0.737245 -0.728409 -0.067164 
 -0.735969 -0.728409 -0.078358 
 -0.735969 -0.727828 -0.063433 
 -0.735969 -0.727246 -0.063433 
 -0.734694 -0.727246 -0.078358 
 -0.734694 -0.726665 -0.070896 
 -0.734694 -0.726083 -0.070896 
 -0.733418 -0.726083 -0.093284 
 -0.733418 -0.725502 -0.100746 
 -0.733418 -0.724920 -0.115672 
 -0.732143 -0.724920 -0.149254 
 -0.732143 -0.724338 -0.167910 
 -0.732143 -0.723757 -0.186567 
 -0.732143 -0.723175 -0.212687 
 -0.730867 -0.723175 -0.235075 
 -0.730867 -0.722594 -0.242537 
 -0.730867 -0.722012 -0.242537 
 -0.729592 -0.722012 -0.268657 
 -0.729592 -0.721431 -0.272388 
 -0.729592 -0.720849 -0.276119 
 -0.728316 -0.720849 -0.298507 
 -0.728316 -0.720268 -0.309701 
 -0.728316 -0.719686 -0.317164 
 -0.727041 -0.719686 -0.339552 
 -0.727041 -0.719104 -0.350746 
 -0.727041 -0.718523 -0.358209 
 -0.725765 -0.718523 -0.380597 
 -0.725765 -0.717941 -0.388060 
 -0.725765 -0.717360 -0.391791 
 -0.724490 -0.717360 -0.414179 
 -0.724490 -0.716778 -0.421642 
 -0.724490 -0.716197 -0.425373 
 -0.723214 -0.716197 -0.451493 
 -0.723214 -0.715615 -0.458955 
 -0.723214 -0.715033 -0.466418 
 -0.721939 -0.715033 -0.488806 
 -0.721939 -0.714452 -0.492537 
 -0.721939 -0.713870 -0.503731 
 -0.720663 -0.713870 -0.496269 
 -0.720663 -0.713289 -0.503731 
 -0.720663 -0.712707 -0.507463 
 -0.719388 -0.712707 -0.496269 
 -0.719388 -0.712126 -0.496269 
 -0.719388 -0.711544 -0.492537 
 -0.718112 -0.711544 -0.477612 
 -0.718112 -0.710962 -0.477612 
 -0.718112 -0.710381 -0.473881 
 -0.716837 -0.710381 -0.455224 
 -0.716837 -0.709799 -0.455224 
 -0.716837 -0.709218 -0.455224 
 -0.715561 -0.709218 -0.432836 
 -0.715561 -0.708636 -0.432836 
 -0.715561 -0.708055 -0.436567 
 -0.714286 -0.708055 -0.410448 
 -0.714286 -0.707473 -0.417910 
 -0.714286 -0.706892 -0.429104 
 -0.713010 -0.706892 -0.410448 
 -0.713010 -0.706310 -0.417910 
 -0.713010 -0.705728 -0.406716 
 -0.711735 -0.705728 -0.384328 
 -0.711735 -0.705147 -0.376866 
 -0.711735 -0.704565 -0.365672 
 -0.710459 -0.704565 -0.339552 
 -0.710459 -0.703984 -0.335821 
 -0.710459 -0.703402 -0.335821 
 -0.709184 -0.702821 -0.317164 
 -0.709184 -0.702239 -0.328358 
 -0.709184 -0.701657 -0.347015 
 -0.707908 -0.701657 -0.324627 
 -0.707908 -0.701076 -0.358209 
 -0.707908 -0.700494 -0.410448 
 -0.706633 -0.700494 -0.410448 
 -0.706633 -0.699913 -0.440299 
 -0.706633 -0.699331 -0.485075 
 -0.705357 -0.699331 -0.477612 
 -0.705357 -0.698750 -0.503731 
 -0.705357 -0.698168 -0.529851 
 -0.704082 -0.698168 -0.522388 
 -0.704082 -0.697587 -0.541045 
 -0.704082 -0.697005 -0.570896 
 -0.702806 -0.697005 -0.563433 
 -0.702806 -0.696423 -0.582090 
 -0.702806 -0.695842 -0.604478 
 -0.701531 -0.695842 -0.597015 
 -0.701531 -0.695260 -0.608209 
 -0.701531 -0.694679 -0.623134 
 -0.700255 -0.694679 -0.611940 
 -0.700255 -0.694097 -0.623134 
 -0.700255 -0.693516 -0.641791 
 -0.698980 -0.693516 -0.626866 
 -0.698980 -0.692934 -0.667910 
 -0.698980 -0.692352 -0.686567 
 -0.697704 -0.692352 -0.667910 
 -0.697704 -0.691771 -0.690299 
 -0.697704 -0.691189 -0.705224 
 -0.696429 -0.691189 -0.690299 
 -0.696429 -0.690608 -0.716418 
 -0.696429 -0.690026 -0.742537 
 -0.695153 -0.690026 -0.723881 
 -0.695153 -0.689445 -0.757463 
 -0.695153 -0.688863 -0.757463 
 -0.693878 -0.688863 -0.757463 
 -0.693878 -0.688281 -0.757463 
 -0.693878 -0.687700 -0.764925 
 -0.692602 -0.687700 -0.750000 
 -0.692602 -0.687118 -0.772388 
 -0.692602 -0.686537 -0.787313 
 -0.691327 -0.685955 -0.794776 
 -0.691327 -0.685374 -0.805970 
 -0.691327 -0.684792 -0.809701 
 -0.690051 -0.684792 -0.809701 
 -0.690051 -0.684211 -0.813433 
 -0.690051 -0.683629 -0.824627 
 -0.688776 -0.683629 -0.824627 
 -0.688776 -0.683047 -0.828358 
 -0.688776 -0.682466 -0.824627 
 -0.687500 -0.682466 -0.828358 
 -0.687500 -0.681884 -0.828358 
 -0.687500 -0.681303 -0.828358 
 -0.686224 -0.681303 -0.828358 
 -0.686224 -0.680721 -0.832090 
 -0.686224 -0.680140 -0.835821 
 -0.684949 -0.680140 -0.839552 
 -0.684949 -0.679558 -0.839552 
 -0.684949 -0.678976 -0.839552 
 -0.683673 -0.678976 -0.839552 
 -0.683673 -0.678395 -0.843284 
 -0.683673 -0.677813 -0.843284 
 -0.682398 -0.677813 -0.847015 
 -0.682398 -0.677232 -0.843284 
 -0.682398 -0.676650 -0.843284 
 -0.681122 -0.676650 -0.850746 
 -0.681122 -0.676069 -0.850746 
 -0.681122 -0.675487 -0.847015 
 -0.679847 -0.675487 -0.850746 
 -0.679847 -0.674905 -0.850746 
 -0.679847 -0.674324 -0.850746 
 -0.678571 -0.674324 -0.854478 
 -0.678571 -0.673742 -0.858209 
 -0.678571 -0.673161 -0.858209 
 -0.677296 -0.673161 -0.865672 
 -0.677296 -0.672579 -0.865672 
 -0.677296 -0.671998 -0.865672 
 -0.677296 -0.671416 -0.865672 
 -0.676020 -0.671416 -0.865672 
 -0.676020 -0.670835 -0.869403 
 -0.676020 -0.670253 -0.869403 
 -0.674745 -0.670253 -0.873134 
 -0.674745 -0.669671 -0.876866 
 -0.674745 -0.669090 -0.876866 
 -0.673469 -0.669090 -0.880597 
 -0.673469 -0.668508 -0.884328 
 -0.673469 -0.667927 -0.884328 
 -0.672194 -0.667927 -0.884328 
 -0.672194 -0.667345 -0.884328 
 -0.672194 -0.666764 -0.884328 
 -0.670918 -0.666764 -0.884328 
 -0.670918 -0.666182 -0.884328 
 -0.670918 -0.665600 -0.884328 
 -0.669643 -0.665600 -0.884328 
 -0.669643 -0.665019 -0.884328 
 -0.669643 -0.664437 -0.884328 
 -0.668367 -0.664437 -0.884328 
 -0.668367 -0.663856 -0.888060 
 -0.668367 -0.663274 -0.888060 
 -0.667092 -0.663274 -0.888060 
 -0.667092 -0.662693 -0.891791 
 -0.667092 -0.662111 -0.895522 
 -0.665816 -0.662111 -0.895522 
 -0.665816 -0.661530 -0.895522 
 -0.665816 -0.660948 -0.899254 
 -0.664541 -0.660366 -0.902985 
 -0.664541 -0.659785 -0.902985 
 -0.664541 -0.659203 -0.902985 
 -0.663265 -0.659203 -0.902985 
 -0.663265 -0.658622 -0.902985 
 -0.663265 -0.658040 -0.902985 
 -0.661990 -0.658040 -0.902985 
 -0.661990 -0.657459 -0.899254 
 -0.661990 -0.656877 -0.850746 
 -0.660714 -0.656877 -0.854478 
 -0.660714 -0.656295 -0.828358 
 -0.660714 -0.655714 -0.865672 
 -0.659439 -0.655714 -0.865672 
 -0.659439 -0.655132 -0.865672 
 -0.659439 -0.654551 -0.865672 
 -0.658163 -0.654551 -0.865672 
 -0.658163 -0.653969 -0.865672 
 -0.658163 -0.653388 -0.843284 
 -0.656888 -0.653388 -0.869403 
 -0.656888 -0.652806 -0.854478 
 -0.656888 -0.652224 -0.876866 
 -0.655612 -0.652224 -0.888060 
 -0.655612 -0.651643 -0.899254 
 -0.655612 -0.651061 -0.910448 
 -0.654337 -0.651061 -0.910448 
 -0.654337 -0.650480 -0.917910 
 -0.654337 -0.649898 -0.921642 
 -0.654337 -0.649317 -0.921642 
 -0.653061 -0.649317 -0.921642 
 -0.653061 -0.648735 -0.921642 
 -0.653061 -0.648154 -0.921642 
 -0.651786 -0.648154 -0.925373 
 -0.651786 -0.647572 -0.940299 
 -0.651786 -0.646990 -0.940299 
 -0.650510 -0.646990 -0.925373 
 -0.650510 -0.646409 -0.929104 
 -0.650510 -0.645827 -0.932836 
 -0.649235 -0.645827 -0.925373 
 -0.649235 -0.645246 -0.936567 
 -0.649235 -0.644664 -0.940299 
 -0.647959 -0.644664 -0.940299 
 -0.647959 -0.644083 -0.940299 
 -0.647959 -0.643501 -0.940299 
 -0.646684 -0.643501 -0.940299 
 -0.646684 -0.642919 -0.940299 
 -0.646684 -0.642338 -0.940299 
 -0.645408 -0.642338 -0.940299 
 -0.645408 -0.641756 -0.940299 
 -0.645408 -0.641175 -0.940299 
 -0.644133 -0.641175 -0.940299 
 -0.644133 -0.640593 -0.940299 
 -0.644133 -0.640012 -0.940299 
 -0.644133 -0.639430 -0.940299 
 -0.642857 -0.639430 -0.940299 
 -0.642857 -0.638849 -0.940299 
 -0.642857 -0.638267 -0.940299 
 -0.641582 -0.638267 -0.940299 
 -0.641582 -0.637685 -0.940299 
 -0.641582 -0.637104 -0.940299 
 -0.640306 -0.637104 -0.940299 
 -0.640306 -0.636522 -0.940299 
 -0.640306 -0.635941 -0.940299 
 -0.639031 -0.635941 -0.940299 
 -0.639031 -0.635359 -0.940299 
 -0.639031 -0.634778 -0.940299 
 -0.637755 -0.634778 -0.940299 
 -0.637755 -0.634196 -0.940299 
 -0.637755 -0.633614 -0.940299 
 -0.636480 -0.633614 -0.940299 
 -0.636480 -0.633033 -0.940299 
 -0.636480 -0.632451 -0.940299 
 -0.635204 -0.632451 -0.940299 
 -0.635204 -0.631870 -0.940299 
 -0.635204 -0.631288 -0.940299 
 -0.635204 -0.630707 -0.940299 
 -0.633929 -0.630707 -0.940299 
 -0.633929 -0.630125 -0.940299 
 -0.633929 -0.629543 -0.940299 
 -0.632653 -0.629543 -0.940299 
 -0.632653 -0.628962 -0.940299 
 -0.632653 -0.628380 -0.940299 
 -0.631378 -0.628380 -0.940299 
 -0.631378 -0.627799 -0.940299 
 -0.631378 -0.627217 -0.940299 
 -0.630102 -0.627217 -0.940299 
 -0.630102 -0.626636 -0.940299 
 -0.630102 -0.626054 -0.936567 
 -0.628827 -0.626054 -0.936567 
 -0.628827 -0.625473 -0.936567 
 -0.628827 -0.624891 -0.936567 
 -0.627551 -0.624891 -0.936567 
 -0.627551 -0.624309 -0.936567 
 -0.627551 -0.623728 -0.936567 
 -0.626276 -0.623728 -0.936567 
 -0.626276 -0.623146 -0.936567 
 -0.626276 -0.622565 -0.936567 
 -0.626276 -0.621983 -0.936567 
 -0.625000 -0.621983 -0.936567 
 -0.625000 -0.621402 -0.936567 
 -0.625000 -0.620820 -0.936567 
 -0.623724 -0.620820 -0.936567 
 -0.623724 -0.620238 -0.932836 
 -0.623724 -0.619657 -0.932836 
 -0.622449 -0.619657 -0.932836 
 -0.622449 -0.619075 -0.932836 
 -0.622449 -0.618494 -0.929104 
 -0.621173 -0.618494 -0.929104 
 -0.621173 -0.617912 -0.929104 
 -0.621173 -0.617331 -0.925373 
 -0.619898 -0.617331 -0.925373 
 -0.619898 -0.616749 -0.925373 
 -0.619898 -0.616167 -0.925373 
 -0.618622 -0.616167 -0.925373 
 -0.618622 -0.615586 -0.925373 
 -0.618622 -0.615004 -0.917910 
 -0.617347 -0.614423 -0.876866 
 -0.617347 -0.613841 -0.865672 
 -0.617347 -0.613260 -0.858209 
 -0.616071 -0.613260 -0.828358 
 -0.616071 -0.612678 -0.824627 
 -0.616071 -0.612097 -0.832090 
 -0.614796 -0.612097 -0.805970 
 -0.614796 -0.611515 -0.813433 
 -0.614796 -0.610933 -0.776119 
 -0.613520 -0.610933 -0.768657 
 -0.613520 -0.610352 -0.746269 
 -0.613520 -0.609770 -0.727612 
 -0.612245 -0.609770 -0.708955 
 -0.612245 -0.609189 -0.708955 
 -0.612245 -0.608607 -0.716418 
 -0.610969 -0.608607 -0.694030 
 -0.610969 -0.608026 -0.701493 
 -0.610969 -0.607444 -0.697761 
 -0.609694 -0.607444 -0.679104 
 -0.609694 -0.606862 -0.671642 
 -0.609694 -0.606281 -0.641791 
 -0.609694 -0.605699 -0.615672 
 -0.608418 -0.605699 -0.600746 
 -0.608418 -0.605118 -0.563433 
 -0.608418 -0.604536 -0.548507 
 -0.607143 -0.604536 -0.529851 
 -0.607143 -0.603955 -0.526119 
 -0.607143 -0.603373 -0.541045 
 -0.605867 -0.603373 -0.522388 
 -0.605867 -0.602792 -0.541045 
 -0.605867 -0.602210 -0.570896 
 -0.604592 -0.602210 -0.555970 
 -0.604592 -0.601628 -0.582090 
 -0.604592 -0.601047 -0.615672 
 -0.603316 -0.601047 -0.608209 
 -0.603316 -0.600465 -0.630597 
 -0.603316 -0.599884 -0.667910 
 -0.602041 -0.599884 -0.656716 
 -0.602041 -0.599302 -0.667910 
 -0.602041 -0.598721 -0.682836 
 -0.602041 -0.598139 -0.686567 
 -0.600765 -0.598139 -0.679104 
 -0.600765 -0.597557 -0.671642 
 -0.600765 -0.596976 -0.664179 
 -0.599490 -0.596976 -0.641791 
 -0.599490 -0.596394 -0.645522 
 -0.599490 -0.595813 -0.652985 
 -0.598214 -0.595813 -0.630597 
 -0.598214 -0.595231 -0.638060 
 -0.598214 -0.594650 -0.649254 
 -0.596939 -0.594650 -0.619403 
 -0.596939 -0.594068 -0.619403 
 -0.596939 -0.593486 -0.604478 
 -0.595663 -0.593486 -0.589552 
 -0.595663 -0.592905 -0.567164 
 -0.595663 -0.592323 -0.522388 
 -0.594388 -0.591742 -0.492537 
 -0.594388 -0.591160 -0.451493 
 -0.594388 -0.590579 -0.440299 
 -0.593112 -0.590579 -0.421642 
 -0.593112 -0.589997 -0.417910 
 -0.593112 -0.589416 -0.417910 
 -0.591837 -0.589416 -0.391791 
 -0.591837 -0.588834 -0.391791 
 -0.591837 -0.588252 -0.395522 
 -0.590561 -0.588252 -0.391791 
 -0.590561 -0.587671 -0.432836 
 -0.590561 -0.587089 -0.458955 
 -0.589286 -0.587089 -0.466418 
 -0.589286 -0.586508 -0.492537 
 -0.589286 -0.585926 -0.526119 
 -0.588010 -0.585926 -0.537313 
 -0.588010 -0.585345 -0.559701 
 -0.588010 -0.584763 -0.593284 
 -0.588010 -0.584181 -0.608209 
 -0.586735 -0.584181 -0.593284 
 -0.586735 -0.583600 -0.611940 
 -0.586735 -0.583018 -0.626866 
 -0.585459 -0.583018 -0.615672 
 -0.585459 -0.582437 -0.626866 
 -0.585459 -0.581855 -0.623134 
 -0.584184 -0.581855 -0.604478 
 -0.584184 -0.581274 -0.585821 
 -0.584184 -0.580692 -0.570896 
 -0.582908 -0.580692 -0.552239 
 -0.582908 -0.580110 -0.544776 
 -0.582908 -0.579529 -0.552239 
 -0.581633 -0.579529 -0.533582 
 -0.581633 -0.578947 -0.555970 
 -0.581633 -0.578366 -0.567164 
 -0.580357 -0.578366 -0.544776 
 -0.580357 -0.577784 -0.529851 
 -0.580357 -0.577203 -0.511194 
 -0.580357 -0.576621 -0.485075 
 -0.579082 -0.576621 -0.466418 
 -0.579082 -0.576040 -0.455224 
 -0.579082 -0.575458 -0.466418 
 -0.577806 -0.575458 -0.462687 
 -0.577806 -0.574876 -0.496269 
 -0.577806 -0.574295 -0.522388 
 -0.576531 -0.574295 -0.526119 
 -0.576531 -0.573713 -0.567164 
 -0.576531 -0.573132 -0.597015 
 -0.575255 -0.573132 -0.593284 
 -0.575255 -0.572550 -0.608209 
 -0.575255 -0.571969 -0.608209 
 -0.573980 -0.571969 -0.597015 
 -0.573980 -0.571387 -0.578358 
 -0.573980 -0.570805 -0.567164 
 -0.572704 -0.570805 -0.548507 
 -0.572704 -0.570224 -0.533582 
 -0.572704 -0.569642 -0.522388 
 -0.572704 -0.569061 -0.518657 
 -0.571429 -0.569061 -0.492537 
 -0.571429 -0.568479 -0.500000 
 -0.571429 -0.567898 -0.511194 
 -0.570153 -0.567898 -0.488806 
 -0.570153 -0.567316 -0.488806 
 -0.570153 -0.566735 -0.470149 
 -0.568878 -0.566735 -0.458955 
 -0.568878 -0.566153 -0.425373 
 -0.568878 -0.565571 -0.402985 
 -0.567602 -0.565571 -0.391791 
 -0.567602 -0.564990 -0.365672 
 -0.567602 -0.564408 -0.350746 
 -0.566327 -0.564408 -0.339552 
 -0.566327 -0.563827 -0.332090 
 -0.566327 -0.563245 -0.335821 
 -0.566327 -0.562664 -0.347015 
 -0.565051 -0.562664 -0.373134 
 -0.565051 -0.562082 -0.388060 
 -0.565051 -0.561500 -0.395522 
 -0.563776 -0.561500 -0.421642 
 -0.563776 -0.560919 -0.429104 
 -0.563776 -0.560337 -0.436567 
 -0.562500 -0.560337 -0.466418 
 -0.562500 -0.559756 -0.470149 
 -0.562500 -0.559174 -0.473881 
 -0.561224 -0.559174 -0.496269 
 -0.561224 -0.558593 -0.503731 
 -0.561224 -0.558011 -0.522388 
 -0.559949 -0.558011 -0.541045 
 -0.559949 -0.557429 -0.563433 
 -0.559949 -0.556848 -0.582090 
 -0.559949 -0.556266 -0.608209 
 -0.558673 -0.556266 -0.615672 
 -0.558673 -0.555685 -0.634328 
 -0.558673 -0.555103 -0.660448 
 -0.557398 -0.555103 -0.667910 
 -0.557398 -0.554522 -0.686567 
 -0.557398 -0.553940 -0.723881 
 -0.556122 -0.553940 -0.738806 
 -0.556122 -0.553359 -0.735075 
 -0.556122 -0.552777 -0.735075 
 -0.554847 -0.552777 -0.735075 
 -0.554847 -0.552195 -0.720149 
 -0.554847 -0.551614 -0.694030 
 -0.553571 -0.551614 -0.686567 
 -0.553571 -0.551032 -0.667910 
 -0.553571 -0.550451 -0.649254 
 -0.553571 -0.549869 -0.623134 
 -0.552296 -0.549869 -0.623134 
 -0.552296 -0.549288 -0.604478 
 -0.552296 -0.548706 -0.578358 
 -0.551020 -0.548706 -0.578358 
 -0.551020 -0.548124 -0.563433 
 -0.551020 -0.547543 -0.533582 
 -0.549745 -0.547543 -0.544776 
 -0.549745 -0.546961 -0.526119 
 -0.549745 -0.546380 -0.500000 
 -0.548469 -0.546380 -0.507463 
 -0.548469 -0.545798 -0.488806 
 -0.548469 -0.545217 -0.455224 
 -0.547194 -0.545217 -0.477612 
 -0.547194 -0.544635 -0.462687 
 -0.547194 -0.544054 -0.447761 
 -0.547194 -0.543472 -0.436567 
 -0.545918 -0.543472 -0.470149 
 -0.545918 -0.542890 -0.462687 
 -0.545918 -0.542309 -0.458955 
 -0.544643 -0.542309 -0.488806 
 -0.544643 -0.541727 -0.488806 
 -0.544643 -0.541146 -0.492537 
 -0.543367 -0.541146 -0.514925 
 -0.543367 -0.540564 -0.507463 
 -0.543367 -0.539983 -0.485075 
 -0.542092 -0.539983 -0.503731 
 -0.542092 -0.539401 -0.492537 
 -0.542092 -0.538819 -0.481343 
 -0.540816 -0.538238 -0.511194 
 -0.540816 -0.537656 -0.511194 
 -0.540816 -0.537075 -0.511194 
 -0.539541 -0.537075 -0.507463 
 -0.539541 -0.536493 -0.477612 
 -0.539541 -0.535912 -0.458955 
 -0.538265 -0.535912 -0.436567 
 -0.538265 -0.535330 -0.410448 
 -0.538265 -0.534748 -0.391791 
 -0.536990 -0.534748 -0.369403 
 -0.536990 -0.534167 -0.343284 
 -0.536990 -0.533585 -0.335821 
 -0.535714 -0.533585 -0.305970 
 -0.535714 -0.533004 -0.294776 
 -0.535714 -0.532422 -0.291045 
 -0.535714 -0.531841 -0.287313 
 -0.534439 -0.531841 -0.268657 
 -0.534439 -0.531259 -0.268657 
 -0.534439 -0.530678 -0.264925 
 -0.533163 -0.530678 -0.268657 
 -0.533163 -0.530096 -0.272388 
 -0.533163 -0.529514 -0.287313 
 -0.531888 -0.529514 -0.313433 
 -0.531888 -0.528933 -0.347015 
 -0.531888 -0.528351 -0.369403 
 -0.530612 -0.528351 -0.399254 
 -0.530612 -0.527770 -0.429104 
 -0.530612 -0.527188 -0.429104 
 -0.529337 -0.527188 -0.429104 
 -0.529337 -0.526607 -0.410448 
 -0.529337 -0.526025 -0.399254 
 -0.529337 -0.525443 -0.365672 
 -0.528061 -0.525443 -0.369403 
 -0.528061 -0.524862 -0.347015 
 -0.528061 -0.524280 -0.309701 
 -0.526786 -0.524280 -0.313433 
 -0.526786 -0.523699 -0.287313 
 -0.526786 -0.523117 -0.257463 
 -0.525510 -0.523117 -0.257463 
 -0.525510 -0.522536 -0.216418 
 -0.525510 -0.521954 -0.212687 
 -0.524235 -0.521954 -0.242537 
 -0.524235 -0.521372 -0.261194 
 -0.524235 -0.520791 -0.261194 
 -0.524235 -0.520209 -0.257463 
 -0.522959 -0.520209 -0.287313 
 -0.522959 -0.519628 -0.268657 
 -0.522959 -0.519046 -0.235075 
 -0.521684 -0.519046 -0.257463 
 -0.521684 -0.518465 -0.227612 
 -0.521684 -0.517883 -0.197761 
 -0.520408 -0.517883 -0.220149 
 -0.520408 -0.517302 -0.235075 
 -0.520408 -0.516720 -0.261194 
 -0.519133 -0.516720 -0.287313 
 -0.519133 -0.516138 -0.302239 
 -0.519133 -0.515557 -0.309701 
 -0.517857 -0.515557 -0.332090 
 -0.517857 -0.514975 -0.328358 
 -0.517857 -0.514394 -0.320896 
 -0.517857 -0.513812 -0.302239 
 -0.516582 -0.513812 -0.324627 
 -0.516582 -0.513231 -0.324627 
 -0.516582 -0.512649 -0.347015 
 -0.515306 -0.512649 -0.373134 
 -0.515306 -0.512067 -0.388060 
 -0.515306 -0.511486 -0.402985 
 -0.514031 -0.511486 -0.417910 
 -0.514031 -0.510904 -0.406716 
 -0.514031 -0.510323 -0.365672 
 -0.512755 -0.510323 -0.358209 
 -0.512755 -0.509741 -0.328358 
 -0.512755 -0.509160 -0.287313 
 -0.512755 -0.508578 -0.268657 
 -0.511480 -0.508578 -0.272388 
 -0.511480 -0.507997 -0.264925 
 -0.511480 -0.507415 -0.264925 
 -0.510204 -0.507415 -0.291045 
 -0.510204 -0.506833 -0.302239 
 -0.510204 -0.506252 -0.302239 
 -0.508929 -0.506252 -0.320896 
 -0.508929 -0.505670 -0.320896 
 -0.508929 -0.505089 -0.328358 
 -0.507653 -0.505089 -0.335821 
 -0.507653 -0.504507 -0.324627 
 -0.507653 -0.503926 -0.305970 
 -0.506378 -0.503926 -0.287313 
 -0.506378 -0.503344 -0.272388 
 -0.506378 -0.502762 -0.257463 
 -0.506378 -0.502181 -0.250000 
 -0.505102 -0.502181 -0.223881 
 -0.505102 -0.501599 -0.212687 
 -0.505102 -0.501018 -0.205224 
 -0.503827 -0.501018 -0.175373 
 -0.503827 -0.500436 -0.156716 
 -0.503827 -0.499855 -0.145522 
 -0.502551 -0.499855 -0.119403 
 -0.502551 -0.499273 -0.104478 
 -0.502551 -0.498691 -0.089552 
 -0.501276 -0.498691 -0.055970 
 -0.501276 -0.498110 -0.022388 
 -0.501276 -0.497528 0.000000 
 -0.501276 -0.496947 0.033582 
 -0.500000 -0.496947 0.022388 
 -0.500000 -0.496365 0.029851 
 -0.500000 -0.495784 0.033582 
 -0.498724 -0.495784 0.003731 
 -0.498724 -0.495202 -0.014925 
 -0.498724 -0.494621 -0.029851 
 -0.497449 -0.494621 -0.055970 
 -0.497449 -0.494039 -0.070896 
 -0.497449 -0.493457 -0.070896 
 -0.496173 -0.493457 -0.097015 
 -0.496173 -0.492876 -0.085821 
 -0.496173 -0.492294 -0.070896 
 -0.496173 -0.491713 -0.059701 
 -0.494898 -0.491713 -0.085821 
 -0.494898 -0.491131 -0.082090 
 -0.494898 -0.490550 -0.059701 
 -0.493622 -0.490550 -0.074627 
 -0.493622 -0.489968 -0.070896 
 -0.493622 -0.489386 -0.078358 
 -0.492347 -0.489386 -0.100746 
 -0.492347 -0.488805 -0.108209 
 -0.492347 -0.488223 -0.123134 
 -0.491071 -0.488223 -0.134328 
 -0.491071 -0.487642 -0.115672 
 -0.491071 -0.487060 -0.085821 
 -0.489796 -0.486479 -0.055970 
 -0.489796 -0.485897 -0.041045 
 -0.489796 -0.485315 -0.048507 
 -0.488520 -0.485315 -0.074627 
 -0.488520 -0.484734 -0.085821 
 -0.488520 -0.484152 -0.074627 
 -0.487245 -0.484152 -0.085821 
 -0.487245 -0.483571 -0.067164 
 -0.487245 -0.482989 -0.029851 
 -0.485969 -0.482989 -0.044776 
 -0.485969 -0.482408 -0.026119 
 -0.485969 -0.481826 -0.011194 
 -0.484694 -0.481826 -0.029851 
 -0.484694 -0.481245 -0.007463 
 -0.484694 -0.480663 0.026119 
 -0.484694 -0.480081 0.048507 
 -0.483418 -0.480081 0.033582 
 -0.483418 -0.479500 0.070896 
 -0.483418 -0.478918 0.100746 
 -0.482143 -0.478918 0.104478 
 -0.482143 -0.478337 0.130597 
 -0.482143 -0.477755 0.167910 
 -0.480867 -0.477755 0.171642 
 -0.480867 -0.477174 0.197761 
 -0.480867 -0.476592 0.216418 
 -0.479592 -0.476592 0.190299 
 -0.479592 -0.476010 0.164179 
 -0.479592 -0.475429 0.108209 
 -0.479592 -0.474847 0.097015 
 -0.478316 -0.474847 0.055970 
 -0.478316 -0.474266 0.059701 
 -0.478316 -0.473684 0.041045 
 -0.477041 -0.473684 0.022388 
 -0.477041 -0.473103 0.037313 
 -0.477041 -0.472521 0.029851 
 -0.475765 -0.472521 0.014925 
 -0.475765 -0.471940 0.052239 
 -0.475765 -0.471358 0.082090 
 -0.474490 -0.471358 0.074627 
 -0.474490 -0.470776 0.119403 
 -0.474490 -0.470195 0.152985 
 -0.474490 -0.469613 0.186567 
 -0.473214 -0.469613 0.175373 
 -0.473214 -0.469032 0.212687 
 -0.473214 -0.468450 0.227612 
 -0.471939 -0.468450 0.197761 
 -0.471939 -0.467869 0.231343 
 -0.471939 -0.467287 0.261194 
 -0.470663 -0.467287 0.242537 
 -0.470663 -0.466705 0.268657 
 -0.470663 -0.466124 0.283582 
 -0.469388 -0.466124 0.253731 
 -0.469388 -0.465542 0.272388 
 -0.469388 -0.464961 0.268657 
 -0.469388 -0.464379 0.242537 
 -0.468112 -0.464379 0.246269 
 -0.468112 -0.463798 0.227612 
 -0.468112 -0.463216 0.194030 
 -0.466837 -0.463216 0.205224 
 -0.466837 -0.462634 0.186567 
 -0.466837 -0.462053 0.149254 
 -0.465561 -0.462053 0.156716 
 -0.465561 -0.461471 0.134328 
 -0.465561 -0.460890 0.115672 
 -0.464286 -0.460890 0.138060 
 -0.464286 -0.460308 0.141791 
 -0.464286 -0.459727 0.149254 
 -0.464286 -0.459145 0.130597 
 -0.463010 -0.459145 0.134328 
 -0.463010 -0.458564 0.104478 
 -0.463010 -0.457982 0.063433 
 -0.461735 -0.457982 0.059701 
 -0.461735 -0.457400 0.041045 
 -0.461735 -0.456819 0.029851 
 -0.460459 -0.456819 0.052239 
 -0.460459 -0.456237 0.055970 
 -0.460459 -0.455656 0.055970 
 -0.459184 -0.455656 0.085821 
 -0.459184 -0.455074 0.085821 
 -0.459184 -0.454493 0.085821 
 -0.459184 -0.453911 0.074627 
 -0.457908 -0.453911 0.078358 
 -0.457908 -0.453329 0.037313 
 -0.457908 -0.452748 0.007463 
 -0.456633 -0.452748 0.007463 
 -0.456633 -0.452166 -0.033582 
 -0.456633 -0.451585 -0.052239 
 -0.455357 -0.451585 -0.044776 
 -0.455357 -0.451003 -0.037313 
 -0.455357 -0.450422 -0.014925 
 -0.454082 -0.450422 0.014925 
 -0.454082 -0.449840 0.033582 
 -0.454082 -0.449259 0.059701 
 -0.454082 -0.448677 0.059701 
 -0.452806 -0.448677 0.059701 
 -0.452806 -0.448095 0.014925 
 -0.452806 -0.447514 -0.014925 
 -0.451531 -0.447514 -0.022388 
 -0.451531 -0.446932 -0.067164 
 -0.451531 -0.446351 -0.097015 
 -0.450255 -0.446351 -0.093284 
 -0.450255 -0.445769 -0.097015 
 -0.450255 -0.445188 -0.085821 
 -0.448980 -0.445188 -0.059701 
 -0.448980 -0.444606 -0.041045 
 -0.448980 -0.444024 -0.029851 
 -0.448980 -0.443443 -0.052239 
 -0.447704 -0.443443 -0.044776 
 -0.447704 -0.442861 -0.070896 
 -0.447704 -0.442280 -0.097015 
 -0.446429 -0.442280 -0.097015 
 -0.446429 -0.441698 -0.138060 
 -0.446429 -0.441117 -0.164179 
 -0.445153 -0.441117 -0.160448 
 -0.445153 -0.440535 -0.197761 
 -0.445153 -0.439953 -0.212687 
 -0.443878 -0.439953 -0.205224 
 -0.443878 -0.439372 -0.186567 
 -0.443878 -0.438790 -0.171642 
 -0.443878 -0.438209 -0.156716 
 -0.442602 -0.438209 -0.134328 
 -0.442602 -0.437627 -0.134328 
 -0.442602 -0.437046 -0.115672 
 -0.441327 -0.437046 -0.100746 
 -0.441327 -0.436464 -0.078358 
 -0.441327 -0.435883 -0.037313 
 -0.440051 -0.435883 -0.033582 
 -0.440051 -0.435301 -0.007463 
 -0.440051 -0.434719 0.033582 
 -0.438776 -0.434719 0.037313 
 -0.438776 -0.434138 0.067164 
 -0.438776 -0.433556 0.093284 
 -0.438776 -0.432975 0.123134 
 -0.437500 -0.432975 0.134328 
 -0.437500 -0.432393 0.156716 
 -0.437500 -0.431812 0.167910 
 -0.436224 -0.431812 0.186567 
 -0.436224 -0.431230 0.179104 
 -0.436224 -0.430648 0.152985 
 -0.434949 -0.430648 0.179104 
 -0.434949 -0.430067 0.160448 
 -0.434949 -0.429485 0.141791 
 -0.433673 -0.429485 0.171642 
 -0.433673 -0.428904 0.175373 
 -0.433673 -0.428322 0.179104 
 -0.433673 -0.427741 0.186567 
 -0.432398 -0.427741 0.167910 
 -0.432398 -0.427159 0.145522 
 -0.432398 -0.426577 0.119403 
 -0.431122 -0.426577 0.085821 
 -0.431122 -0.425996 0.055970 
 -0.431122 -0.425414 0.044776 
 -0.429847 -0.425414 0.022388 
 -0.429847 -0.424833 0.003731 
 -0.429847 -0.424251 -0.014925 
 -0.428571 -0.424251 -0.033582 
 -0.428571 -0.423670 -0.052239 
 -0.428571 -0.423088 -0.074627 
 -0.428571 -0.422507 -0.089552 
 -0.427296 -0.422507 -0.108209 
 -0.427296 -0.421925 -0.123134 
 -0.427296 -0.421343 -0.126866 
 -0.426020 -0.421343 -0.141791 
 -0.426020 -0.420762 -0.145522 
 -0.426020 -0.420180 -0.141791 
 -0.424745 -0.420180 -0.164179 
 -0.424745 -0.419599 -0.171642 
 -0.424745 -0.419017 -0.182836 
 -0.423469 -0.419017 -0.205224 
 -0.423469 -0.418436 -0.220149 
 -0.423469 -0.417854 -0.227612 
 -0.422194 -0.417272 -0.257463 
 -0.422194 -0.416691 -0.268657 
 -0.422194 -0.416109 -0.287313 
 -0.420918 -0.416109 -0.294776 
 -0.420918 -0.415528 -0.305970 
 -0.420918 -0.414946 -0.317164 
 -0.419643 -0.414946 -0.324627 
 -0.419643 -0.414365 -0.343284 
 -0.419643 -0.413783 -0.343284 
 -0.418367 -0.413783 -0.361940 
 -0.418367 -0.413202 -0.373134 
 -0.418367 -0.412620 -0.380597 
 -0.417092 -0.412038 -0.395522 
 -0.417092 -0.411457 -0.399254 
 -0.417092 -0.410875 -0.399254 
 -0.415816 -0.410875 -0.399254 
 -0.415816 -0.410294 -0.406716 
 -0.415816 -0.409712 -0.414179 
 -0.414541 -0.409712 -0.402985 
 -0.414541 -0.409131 -0.406716 
 -0.414541 -0.408549 -0.406716 
 -0.413265 -0.408549 -0.395522 
 -0.413265 -0.407967 -0.395522 
 -0.413265 -0.407386 -0.399254 
 -0.411990 -0.407386 -0.391791 
 -0.411990 -0.406804 -0.395522 
 -0.411990 -0.406223 -0.402985 
 -0.411990 -0.405641 -0.406716 
 -0.410714 -0.405641 -0.391791 
 -0.410714 -0.405060 -0.380597 
 -0.410714 -0.404478 -0.369403 
 -0.409439 -0.404478 -0.350746 
 -0.409439 -0.403896 -0.350746 
 -0.409439 -0.403315 -0.354478 
 -0.408163 -0.403315 -0.335821 
 -0.408163 -0.402733 -0.339552 
 -0.408163 -0.402152 -0.317164 
 -0.406888 -0.402152 -0.298507 
 -0.406888 -0.401570 -0.283582 
 -0.406888 -0.400989 -0.276119 
 -0.406888 -0.400407 -0.272388 
 -0.405612 -0.400407 -0.250000 
 -0.405612 -0.399826 -0.261194 
 -0.405612 -0.399244 -0.276119 
 -0.404337 -0.399244 -0.276119 
 -0.404337 -0.398662 -0.302239 
 -0.404337 -0.398081 -0.324627 
 -0.403061 -0.398081 -0.324627 
 -0.403061 -0.397499 -0.309701 
 -0.403061 -0.396918 -0.305970 
 -0.401786 -0.396918 -0.305970 
 -0.401786 -0.396336 -0.317164 
 -0.401786 -0.395755 -0.339552 
 -0.401786 -0.395173 -0.354478 
 -0.400510 -0.395173 -0.347015 
 -0.400510 -0.394591 -0.369403 
 -0.400510 -0.394010 -0.376866 
 -0.399235 -0.394010 -0.373134 
 -0.399235 -0.393428 -0.388060 
 -0.399235 -0.392847 -0.402985 
 -0.397959 -0.392847 -0.395522 
 -0.397959 -0.392265 -0.414179 
 -0.397959 -0.391684 -0.425373 
 -0.396684 -0.391684 -0.417910 
 -0.396684 -0.391102 -0.429104 
 -0.396684 -0.390521 -0.414179 
 -0.396684 -0.389939 -0.384328 
 -0.395408 -0.389939 -0.380597 
 -0.395408 -0.389357 -0.365672 
 -0.395408 -0.388776 -0.343284 
 -0.394133 -0.388776 -0.317164 
 -0.394133 -0.388194 -0.291045 
 -0.394133 -0.387613 -0.268657 
 -0.392857 -0.387613 -0.253731 
 -0.392857 -0.387031 -0.220149 
 -0.392857 -0.386450 -0.201493 
 -0.391582 -0.386450 -0.186567 
 -0.391582 -0.385868 -0.160448 
 -0.391582 -0.385286 -0.145522 
 -0.390306 -0.385286 -0.130597 
 -0.390306 -0.384705 -0.111940 
 -0.390306 -0.384123 -0.104478 
 -0.390306 -0.383542 -0.119403 
 -0.389031 -0.383542 -0.111940 
 -0.389031 -0.382960 -0.130597 
 -0.389031 -0.382379 -0.152985 
 -0.387755 -0.382379 -0.156716 
 -0.387755 -0.381797 -0.182836 
 -0.387755 -0.381215 -0.212687 
 -0.386480 -0.381215 -0.212687 
 -0.386480 -0.380634 -0.235075 
 -0.386480 -0.380052 -0.268657 
 -0.385204 -0.380052 -0.268657 
 -0.385204 -0.379471 -0.283582 
 -0.385204 -0.378889 -0.298507 
 -0.385204 -0.378308 -0.317164 
 -0.383929 -0.378308 -0.305970 
 -0.383929 -0.377726 -0.309701 
 -0.383929 -0.377145 -0.324627 
 -0.382653 -0.377145 -0.309701 
 -0.382653 -0.376563 -0.324627 
 -0.382653 -0.375981 -0.335821 
 -0.381378 -0.375981 -0.332090 
 -0.381378 -0.375400 -0.343284 
 -0.381378 -0.374818 -0.358209 
 -0.380102 -0.374818 -0.343284 
 -0.380102 -0.374237 -0.343284 
 -0.380102 -0.373655 -0.320896 
 -0.378827 -0.373655 -0.317164 
 -0.378827 -0.373074 -0.302239 
 -0.378827 -0.372492 -0.276119 
 -0.378827 -0.371910 -0.264925 
 -0.377551 -0.371910 -0.257463 
 -0.377551 -0.371329 -0.235075 
 -0.377551 -0.370747 -0.216418 
 -0.376276 -0.370747 -0.201493 
 -0.376276 -0.370166 -0.179104 
 -0.376276 -0.369584 -0.164179 
 -0.375000 -0.369584 -0.141791 
 -0.375000 -0.369003 -0.134328 
 -0.375000 -0.368421 -0.115672 
 -0.373724 -0.368421 -0.093284 
 -0.373724 -0.367839 -0.078358 
 -0.373724 -0.367258 -0.067164 
 -0.373724 -0.366676 -0.055970 
 -0.372449 -0.366676 -0.041045 
 -0.372449 -0.366095 -0.007463 
 -0.372449 -0.365513 0.022388 
 -0.371173 -0.365513 0.044776 
 -0.371173 -0.364932 0.085821 
 -0.371173 -0.364350 0.093284 
 -0.369898 -0.364350 0.104478 
 -0.369898 -0.363769 0.082090 
 -0.369898 -0.363187 0.059701 
 -0.368622 -0.363187 0.059701 
 -0.368622 -0.362605 0.026119 
 -0.368622 -0.362024 0.003731 
 -0.367347 -0.362024 0.000000 
 -0.367347 -0.361442 -0.022388 
 -0.367347 -0.360861 -0.055970 
 -0.367347 -0.360279 -0.070896 
 -0.366071 -0.360279 -0.052239 
 -0.366071 -0.359698 -0.074627 
 -0.366071 -0.359116 -0.089552 
 -0.364796 -0.359116 -0.074627 
 -0.364796 -0.358534 -0.108209 
 -0.364796 -0.357953 -0.130597 
 -0.363520 -0.357953 -0.134328 
 -0.363520 -0.357371 -0.164179 
 -0.363520 -0.356790 -0.179104 
 -0.362245 -0.356790 -0.190299 
 -0.362245 -0.356208 -0.212687 
 -0.362245 -0.355627 -0.238806 
 -0.362245 -0.355045 -0.279851 
 -0.360969 -0.355045 -0.287313 
 -0.360969 -0.354464 -0.313433 
 -0.360969 -0.353882 -0.343284 
 -0.359694 -0.353882 -0.343284 
 -0.359694 -0.353300 -0.369403 
 -0.359694 -0.352719 -0.391791 
 -0.358418 -0.352719 -0.384328 
 -0.358418 -0.352137 -0.399254 
 -0.358418 -0.351556 -0.399254 
 -0.357143 -0.351556 -0.391791 
 -0.357143 -0.350974 -0.380597 
 -0.357143 -0.350393 -0.380597 
 -0.355867 -0.350393 -0.365672 
 -0.355867 -0.349811 -0.358209 
 -0.355867 -0.349229 -0.332090 
 -0.355867 -0.348648 -0.302239 
 -0.354592 -0.348648 -0.283582 
 -0.354592 -0.348066 -0.268657 
 -0.354592 -0.347485 -0.253731 
 -0.353316 -0.347485 -0.227612 
 -0.353316 -0.346903 -0.235075 
 -0.353316 -0.346322 -0.246269 
 -0.352041 -0.346322 -0.220149 
 -0.352041 -0.345740 -0.220149 
 -0.352041 -0.345158 -0.201493 
 -0.350765 -0.345158 -0.175373 
 -0.350765 -0.344577 -0.160448 
 -0.350765 -0.343995 -0.130597 
 -0.349490 -0.343414 -0.078358 
 -0.349490 -0.342832 -0.063433 
 -0.349490 -0.342251 -0.078358 
 -0.348214 -0.342251 -0.104478 
 -0.348214 -0.341669 -0.123134 
 -0.348214 -0.341088 -0.160448 
 -0.346939 -0.341088 -0.179104 
 -0.346939 -0.340506 -0.201493 
 -0.346939 -0.339924 -0.231343 
 -0.345663 -0.339924 -0.246269 
 -0.345663 -0.339343 -0.264925 
 -0.345663 -0.338761 -0.294776 
 -0.344388 -0.338761 -0.305970 
 -0.344388 -0.338180 -0.320896 
 -0.344388 -0.337598 -0.343284 
 -0.344388 -0.337017 -0.358209 
 -0.343112 -0.337017 -0.350746 
 -0.343112 -0.336435 -0.373134 
 -0.343112 -0.335853 -0.373134 
 -0.341837 -0.335853 -0.354478 
 -0.341837 -0.335272 -0.350746 
 -0.341837 -0.334690 -0.339552 
 -0.340561 -0.334690 -0.324627 
 -0.340561 -0.334109 -0.309701 
 -0.340561 -0.333527 -0.291045 
 -0.339286 -0.333527 -0.272388 
 -0.339286 -0.332946 -0.268657 
 -0.339286 -0.332364 -0.279851 
 -0.338010 -0.332364 -0.253731 
 -0.338010 -0.331782 -0.261194 
 -0.338010 -0.331201 -0.276119 
 -0.338010 -0.330619 -0.261194 
 -0.336735 -0.330619 -0.242537 
 -0.336735 -0.330038 -0.227612 
 -0.336735 -0.329456 -0.231343 
 -0.335459 -0.329456 -0.205224 
 -0.335459 -0.328875 -0.220149 
 -0.335459 -0.328293 -0.212687 
 -0.334184 -0.328293 -0.190299 
 -0.334184 -0.327712 -0.149254 
 -0.334184 -0.327130 -0.119403 
 -0.332908 -0.327130 -0.108209 
 -0.332908 -0.326548 -0.067164 
 -0.332908 -0.325967 -0.041045 
 -0.331633 -0.325967 -0.026119 
 -0.331633 -0.325385 0.007463 
 -0.331633 -0.324804 0.052239 
 -0.331633 -0.324222 0.074627 
 -0.330357 -0.324222 0.085821 
 -0.330357 -0.323641 0.048507 
 -0.330357 -0.323059 0.018657 
 -0.329082 -0.323059 0.003731 
 -0.329082 -0.322477 -0.037313 
 -0.329082 -0.321896 -0.055970 
 -0.327806 -0.321896 -0.070896 
 -0.327806 -0.321314 -0.100746 
 -0.327806 -0.320733 -0.123134 
 -0.326531 -0.320733 -0.134328 
 -0.326531 -0.320151 -0.160448 
 -0.326531 -0.319570 -0.179104 
 -0.325255 -0.318988 -0.201493 
 -0.325255 -0.318407 -0.208955 
 -0.325255 -0.317825 -0.208955 
 -0.323980 -0.317825 -0.179104 
 -0.323980 -0.317243 -0.179104 
 -0.323980 -0.316662 -0.182836 
 -0.322704 -0.316662 -0.175373 
 -0.322704 -0.316080 -0.201493 
 -0.322704 -0.315499 -0.227612 
 -0.321429 -0.315499 -0.235075 
 -0.321429 -0.314917 -0.253731 
 -0.321429 -0.314336 -0.261194 
 -0.320153 -0.314336 -0.246269 
 -0.320153 -0.313754 -0.246269 
 -0.320153 -0.313172 -0.238806 
 -0.320153 -0.312591 -0.216418 
 -0.318878 -0.312591 -0.201493 
 -0.318878 -0.312009 -0.190299 
 -0.318878 -0.311428 -0.182836 
 -0.317602 -0.311428 -0.167910 
 -0.317602 -0.310846 -0.179104 
 -0.317602 -0.310265 -0.201493 
 -0.316327 -0.310265 -0.194030 
 -0.316327 -0.309683 -0.220149 
 -0.316327 -0.309101 -0.257463 
 -0.315051 -0.309101 -0.246269 
 -0.315051 -0.308520 -0.257463 
 -0.315051 -0.307938 -0.272388 
 -0.313776 -0.307938 -0.250000 
 -0.313776 -0.307357 -0.261194 
 -0.313776 -0.306775 -0.264925 
 -0.313776 -0.306194 -0.257463 
 -0.312500 -0.306194 -0.235075 
 -0.312500 -0.305612 -0.231343 
 -0.312500 -0.305031 -0.220149 
 -0.311224 -0.305031 -0.201493 
 -0.311224 -0.304449 -0.190299 
 -0.311224 -0.303867 -0.175373 
 -0.309949 -0.303867 -0.160448 
 -0.309949 -0.303286 -0.152985 
 -0.309949 -0.302704 -0.175373 
 -0.308673 -0.302704 -0.156716 
 -0.308673 -0.302123 -0.167910 
 -0.308673 -0.301541 -0.175373 
 -0.307398 -0.301541 -0.152985 
 -0.307398 -0.300960 -0.149254 
 -0.307398 -0.300378 -0.145522 
 -0.307398 -0.299796 -0.141791 
 -0.306122 -0.299796 -0.119403 
 -0.306122 -0.299215 -0.104478 
 -0.306122 -0.298633 -0.100746 
 -0.304847 -0.298633 -0.074627 
 -0.304847 -0.298052 -0.067164 
 -0.304847 -0.297470 -0.052239 
 -0.303571 -0.297470 -0.029851 
 -0.303571 -0.296889 -0.018657 
 -0.303571 -0.296307 0.007463 
 -0.302296 -0.296307 0.026119 
 -0.302296 -0.295726 0.041045 
 -0.302296 -0.295144 0.063433 
 -0.301020 -0.295144 0.052239 
 -0.301020 -0.294562 0.044776 
 -0.301020 -0.293981 0.041045 
 -0.301020 -0.293399 0.041045 
 -0.299745 -0.293399 0.007463 
 -0.299745 -0.292818 0.003731 
 -0.299745 -0.292236 0.007463 
 -0.298469 -0.292236 -0.014925 
 -0.298469 -0.291655 -0.007463 
 -0.298469 -0.291073 0.003731 
 -0.297194 -0.291073 -0.018657 
 -0.297194 -0.290491 0.000000 
 -0.297194 -0.289910 -0.011194 
 -0.295918 -0.289910 -0.029851 
 -0.295918 -0.289328 -0.055970 
 -0.295918 -0.288747 -0.100746 
 -0.294643 -0.288747 -0.104478 
 -0.294643 -0.288165 -0.138060 
 -0.294643 -0.287584 -0.182836 
 -0.294643 -0.287002 -0.212687 
 -0.293367 -0.287002 -0.216418 
 -0.293367 -0.286420 -0.250000 
 -0.293367 -0.285839 -0.276119 
 -0.292092 -0.285839 -0.279851 
 -0.292092 -0.285257 -0.317164 
 -0.292092 -0.284676 -0.332090 
 -0.290816 -0.284676 -0.339552 
 -0.290816 -0.284094 -0.361940 
 -0.290816 -0.283513 -0.361940 
 -0.289541 -0.283513 -0.388060 
 -0.289541 -0.282931 -0.376866 
 -0.289541 -0.282350 -0.365672 
 -0.288265 -0.282350 -0.391791 
 -0.288265 -0.281768 -0.391791 
 -0.288265 -0.281186 -0.391791 
 -0.288265 -0.280605 -0.384328 
 -0.286990 -0.280605 -0.402985 
 -0.286990 -0.280023 -0.388060 
 -0.286990 -0.279442 -0.376866 
 -0.285714 -0.279442 -0.395522 
 -0.285714 -0.278860 -0.395522 
 -0.285714 -0.278279 -0.388060 
 -0.284439 -0.278279 -0.410448 
 -0.284439 -0.277697 -0.388060 
 -0.284439 -0.277115 -0.399254 
 -0.283163 -0.277115 -0.406716 
 -0.283163 -0.276534 -0.436567 
 -0.283163 -0.275952 -0.458955 
 -0.283163 -0.275371 -0.492537 
 -0.281888 -0.275371 -0.492537 
 -0.281888 -0.274789 -0.514925 
 -0.281888 -0.274208 -0.548507 
 -0.280612 -0.274208 -0.548507 
 -0.280612 -0.273626 -0.570896 
 -0.280612 -0.273044 -0.589552 
 -0.279337 -0.273044 -0.600746 
 -0.279337 -0.272463 -0.604478 
 -0.279337 -0.271881 -0.600746 
 -0.278061 -0.271881 -0.611940 
 -0.278061 -0.271300 -0.608209 
 -0.278061 -0.270718 -0.604478 
 -0.276786 -0.270718 -0.619403 
 -0.276786 -0.270137 -0.615672 
 -0.276786 -0.269555 -0.608209 
 -0.276786 -0.268974 -0.582090 
 -0.275510 -0.268974 -0.593284 
 -0.275510 -0.268392 -0.578358 
 -0.275510 -0.267810 -0.555970 
 -0.274235 -0.267810 -0.567164 
 -0.274235 -0.267229 -0.563433 
 -0.274235 -0.266647 -0.600746 
 -0.272959 -0.266647 -0.611940 
 -0.272959 -0.266066 -0.630597 
 -0.272959 -0.265484 -0.649254 
 -0.271684 -0.265484 -0.664179 
 -0.271684 -0.264903 -0.671642 
 -0.271684 -0.264321 -0.690299 
 -0.270408 -0.264321 -0.701493 
 -0.270408 -0.263739 -0.712687 
 -0.270408 -0.263158 -0.735075 
 -0.270408 -0.262576 -0.738806 
 -0.269133 -0.262576 -0.750000 
 -0.269133 -0.261995 -0.750000 
 -0.269133 -0.261413 -0.750000 
 -0.267857 -0.261413 -0.764925 
 -0.267857 -0.260832 -0.764925 
 -0.267857 -0.260250 -0.761194 
 -0.266582 -0.260250 -0.772388 
 -0.266582 -0.259669 -0.779851 
 -0.266582 -0.259087 -0.791045 
 -0.265306 -0.259087 -0.802239 
 -0.265306 -0.258505 -0.809701 
 -0.265306 -0.257924 -0.813433 
 -0.264031 -0.257924 -0.824627 
 -0.264031 -0.257342 -0.817164 
 -0.264031 -0.256761 -0.809701 
 -0.264031 -0.256179 -0.813433 
 -0.262755 -0.256179 -0.820896 
 -0.262755 -0.255598 -0.835821 
 -0.262755 -0.255016 -0.847015 
 -0.261480 -0.255016 -0.847015 
 -0.261480 -0.254434 -0.850746 
 -0.261480 -0.253853 -0.847015 
 -0.260204 -0.253853 -0.858209 
 -0.260204 -0.253271 -0.847015 
 -0.260204 -0.252690 -0.843284 
 -0.258929 -0.252690 -0.850746 
 -0.258929 -0.252108 -0.854478 
 -0.258929 -0.251527 -0.854478 
 -0.257653 -0.251527 -0.861940 
 -0.257653 -0.250945 -0.865672 
 -0.257653 -0.250363 -0.869403 
 -0.257653 -0.249782 -0.873134 
 -0.256378 -0.249782 -0.880597 
 -0.256378 -0.249200 -0.884328 
 -0.256378 -0.248619 -0.884328 
 -0.255102 -0.248619 -0.891791 
 -0.255102 -0.248037 -0.902985 
 -0.255102 -0.247456 -0.902985 
 -0.253827 -0.247456 -0.910448 
 -0.253827 -0.246874 -0.910448 
 -0.253827 -0.246293 -0.914179 
 -0.252551 -0.246293 -0.921642 
 -0.252551 -0.245711 -0.925373 
 -0.252551 -0.245129 -0.925373 
 -0.251276 -0.245129 -0.925373 
 -0.251276 -0.244548 -0.929104 
 -0.251276 -0.243966 -0.929104 
 -0.251276 -0.243385 -0.929104 
 -0.250000 -0.243385 -0.929104 
 -0.250000 -0.242803 -0.932836 
 -0.250000 -0.242222 -0.936567 
 -0.248724 -0.242222 -0.932836 
 -0.248724 -0.241640 -0.936567 
 -0.248724 -0.241058 -0.940299 
 -0.247449 -0.241058 -0.936567 
 -0.247449 -0.240477 -0.940299 
 -0.247449 -0.239895 -0.940299 
 -0.246173 -0.239895 -0.940299 
 -0.246173 -0.239314 -0.940299 
 -0.246173 -0.238732 -0.940299 
 -0.244898 -0.238732 -0.940299 
 -0.244898 -0.238151 -0.940299 
 -0.244898 -0.237569 -0.940299 
 -0.244898 -0.236987 -0.940299 
 -0.243622 -0.236987 -0.940299 
 -0.243622 -0.236406 -0.940299 
 -0.243622 -0.235824 -0.940299 
 -0.242347 -0.235824 -0.940299 
 -0.242347 -0.235243 -0.940299 
 -0.242347 -0.234661 -0.940299 
 -0.241071 -0.234661 -0.940299 
 -0.241071 -0.234080 -0.940299 
 -0.241071 -0.233498 -0.944030 
 -0.239796 -0.233498 -0.944030 
 -0.239796 -0.232917 -0.947761 
 -0.239796 -0.232335 -0.947761 
 -0.238520 -0.232335 -0.947761 
 -0.238520 -0.231753 -0.947761 
 -0.238520 -0.231172 -0.947761 
 -0.238520 -0.230590 -0.947761 
 -0.237245 -0.230590 -0.947761 
 -0.237245 -0.230009 -0.947761 
 -0.237245 -0.229427 -0.947761 
 -0.235969 -0.229427 -0.947761 
 -0.235969 -0.228846 -0.947761 
 -0.235969 -0.228264 -0.951493 
 -0.234694 -0.228264 -0.947761 
 -0.234694 -0.227682 -0.951493 
 -0.234694 -0.227101 -0.951493 
 -0.233418 -0.227101 -0.947761 
 -0.233418 -0.226519 -0.951493 
 -0.233418 -0.225938 -0.951493 
 -0.232143 -0.225938 -0.951493 
 -0.232143 -0.225356 -0.951493 
 -0.232143 -0.224775 -0.951493 
 -0.230867 -0.224193 -0.951493 
 -0.230867 -0.223612 -0.955224 
 -0.230867 -0.223030 -0.958955 
 -0.229592 -0.223030 -0.958955 
 -0.229592 -0.222448 -0.958955 
 -0.229592 -0.221867 -0.958955 
 -0.228316 -0.221867 -0.955224 
 -0.228316 -0.221285 -0.951493 
 -0.228316 -0.220704 -0.951493 
 -0.227041 -0.220704 -0.940299 
 -0.227041 -0.220122 -0.940299 
 -0.227041 -0.219541 -0.940299 
 -0.225765 -0.219541 -0.929104 
 -0.225765 -0.218959 -0.921642 
 -0.225765 -0.218377 -0.906716 
 -0.224490 -0.217796 -0.899254 
 -0.224490 -0.217214 -0.917910 
 -0.224490 -0.216633 -0.902985 
 -0.223214 -0.216633 -0.899254 
 -0.223214 -0.216051 -0.873134 
 -0.223214 -0.215470 -0.839552 
 -0.221939 -0.215470 -0.832090 
 -0.221939 -0.214888 -0.813433 
 -0.221939 -0.214306 -0.802239 
 -0.220663 -0.214306 -0.794776 
 -0.220663 -0.213725 -0.813433 
 -0.220663 -0.213143 -0.850746 
 -0.219388 -0.213143 -0.843284 
 -0.219388 -0.212562 -0.861940 
 -0.219388 -0.211980 -0.888060 
 -0.218112 -0.211980 -0.880597 
 -0.218112 -0.211399 -0.899254 
 -0.218112 -0.210817 -0.921642 
 -0.218112 -0.210236 -0.921642 
 -0.216837 -0.210236 -0.921642 
 -0.216837 -0.209654 -0.921642 
 -0.216837 -0.209072 -0.902985 
 -0.215561 -0.209072 -0.895522 
 -0.215561 -0.208491 -0.861940 
 -0.215561 -0.207909 -0.832090 
 -0.214286 -0.207909 -0.832090 
 -0.214286 -0.207328 -0.813433 
 -0.214286 -0.206746 -0.779851 
 -0.213010 -0.206746 -0.779851 
 -0.213010 -0.206165 -0.753731 
 -0.213010 -0.205583 -0.761194 
 -0.211735 -0.205583 -0.746269 
 -0.211735 -0.205001 -0.761194 
 -0.211735 -0.204420 -0.776119 
 -0.211735 -0.203838 -0.783582 
 -0.210459 -0.203838 -0.761194 
 -0.210459 -0.203257 -0.768657 
 -0.210459 -0.202675 -0.783582 
 -0.209184 -0.202675 -0.764925 
 -0.209184 -0.202094 -0.776119 
 -0.209184 -0.201512 -0.753731 
 -0.207908 -0.201512 -0.742537 
 -0.207908 -0.200931 -0.705224 
 -0.207908 -0.200349 -0.679104 
 -0.206633 -0.200349 -0.671642 
 -0.206633 -0.199767 -0.649254 
 -0.206633 -0.199186 -0.645522 
 -0.205357 -0.199186 -0.630597 
 -0.205357 -0.198604 -0.641791 
 -0.205357 -0.198023 -0.667910 
 -0.205357 -0.197441 -0.682836 
 -0.204082 -0.197441 -0.664179 
 -0.204082 -0.196860 -0.660448 
 -0.204082 -0.196278 -0.649254 
 -0.202806 -0.196278 -0.638060 
 -0.202806 -0.195696 -0.623134 
 -0.202806 -0.195115 -0.611940 
 -0.201531 -0.195115 -0.604478 
 -0.201531 -0.194533 -0.604478 
 -0.201531 -0.193952 -0.615672 
 -0.200255 -0.193952 -0.623134 
 -0.200255 -0.193370 -0.641791 
 -0.200255 -0.192789 -0.660448 
 -0.198980 -0.192789 -0.664179 
 -0.198980 -0.192207 -0.701493 
 -0.198980 -0.191625 -0.723881 
 -0.198980 -0.191044 -0.757463 
 -0.197704 -0.191044 -0.757463 
 -0.197704 -0.190462 -0.783582 
 -0.197704 -0.189881 -0.805970 
 -0.196429 -0.189881 -0.820896 
 -0.196429 -0.189299 -0.839552 
 -0.196429 -0.188718 -0.850746 
 -0.195153 -0.188718 -0.865672 
 -0.195153 -0.188136 -0.888060 
 -0.195153 -0.187555 -0.902985 
 -0.193878 -0.187555 -0.921642 
 -0.193878 -0.186973 -0.940299 
 -0.193878 -0.186391 -0.947761 
 -0.192602 -0.186391 -0.955224 
 -0.192602 -0.185810 -0.977612 
 -0.192602 -0.185228 -0.977612 
 -0.191327 -0.184647 -0.973881 
 -0.191327 -0.184065 -0.977612 
 -0.191327 -0.183484 -0.981343 
 -0.190051 -0.183484 -0.981343 
 -0.190051 -0.182902 -0.985075 
 -0.190051 -0.182320 -0.988806 
 -0.188776 -0.182320 -0.988806 
 -0.188776 -0.181739 -0.988806 
 -0.188776 -0.181157 -0.992537 
 -0.187500 -0.181157 -0.992537 
 -0.187500 -0.180576 -0.992537 
 -0.187500 -0.179994 -0.996269 
 -0.186224 -0.179994 -0.996269 
 -0.186224 -0.179413 -0.996269 
 -0.186224 -0.178831 -0.996269 
 -0.184949 -0.178831 -0.996269 
 -0.184949 -0.178249 -1.000000 
 -0.184949 -0.177668 -1.000000 
 -0.184949 -0.177086 -0.996269 
 -0.183673 -0.177086 -0.996269 
 -0.183673 -0.176505 -0.996269 
 -0.183673 -0.175923 -0.996269 
 -0.182398 -0.175923 -0.996269 
 -0.182398 -0.175342 -0.996269 
 -0.182398 -0.174760 -0.996269 
 -0.181122 -0.174760 -0.996269 
 -0.181122 -0.174179 -0.996269 
 -0.181122 -0.173597 -1.000000 
 -0.179847 -0.173597 -0.996269 
 -0.179847 -0.173015 -0.996269 
 -0.179847 -0.172434 -0.996269 
 -0.178571 -0.172434 -0.996269 
 -0.178571 -0.171852 -0.996269 
 -0.178571 -0.171271 -0.996269 
 -0.178571 -0.170689 -0.996269 
 -0.177296 -0.170689 -0.996269 
 -0.177296 -0.170108 -0.996269 
 -0.177296 -0.169526 -0.996269 
 -0.176020 -0.169526 -0.996269 
 -0.176020 -0.168944 -0.996269 
 -0.176020 -0.168363 -0.996269 
 -0.174745 -0.168363 -0.996269 
 -0.174745 -0.167781 -0.996269 
 -0.174745 -0.167200 -0.996269 
 -0.173469 -0.167200 -0.996269 
 -0.173469 -0.166618 -0.996269 
 -0.173469 -0.166037 -0.996269 
 -0.172194 -0.166037 -0.996269 
 -0.172194 -0.165455 -0.996269 
 -0.172194 -0.164874 -0.996269 
 -0.172194 -0.164292 -0.996269 
 -0.170918 -0.164292 -0.996269 
 -0.170918 -0.163710 -0.996269 
 -0.170918 -0.163129 -0.996269 
 -0.169643 -0.163129 -0.996269 
 -0.169643 -0.162547 -1.000000 
 -0.169643 -0.161966 -1.000000 
 -0.168367 -0.161966 -1.000000 
 -0.168367 -0.161384 -1.000000 
 -0.168367 -0.160803 -1.000000 
 -0.167092 -0.160803 -1.000000 
 -0.167092 -0.160221 -1.000000 
 -0.167092 -0.159639 -1.000000 
 -0.165816 -0.159639 -1.000000 
 -0.165816 -0.159058 -1.000000 
 -0.165816 -0.158476 -1.000000 
 -0.165816 -0.157895 -1.000000 
 -0.164541 -0.157895 -0.996269 
 -0.164541 -0.157313 -0.996269 
 -0.164541 -0.156732 -0.996269 
 -0.163265 -0.156732 -0.996269 
 -0.163265 -0.156150 -0.996269 
 -0.163265 -0.155568 -0.996269 
 -0.161990 -0.155568 -0.996269 
 -0.161990 -0.154987 -0.996269 
 -0.161990 -0.154405 -0.996269 
 -0.160714 -0.154405 -0.996269 
 -0.160714 -0.153824 -0.996269 
 -0.160714 -0.153242 -0.996269 
 -0.159439 -0.153242 -0.996269 
 -0.159439 -0.152661 -0.996269 
 -0.159439 -0.152079 -0.988806 
 -0.158163 -0.151498 -0.985075 
 -0.158163 -0.150916 -0.966418 
 -0.158163 -0.150334 -0.955224 
 -0.156888 -0.150334 -0.958955 
 -0.156888 -0.149753 -0.962687 
 -0.156888 -0.149171 -0.988806 
 -0.155612 -0.149171 -0.988806 
 -0.155612 -0.148590 -0.988806 
 -0.155612 -0.148008 -0.992537 
 -0.154337 -0.148008 -0.992537 
 -0.154337 -0.147427 -0.992537 
 -0.154337 -0.146845 -0.996269 
 -0.153061 -0.146845 -0.996269 
 -0.153061 -0.146263 -0.996269 
 -0.153061 -0.145682 -0.996269 
 -0.151786 -0.145682 -0.992537 
 -0.151786 -0.145100 -0.992537 
 -0.151786 -0.144519 -0.996269 
 -0.151786 -0.143937 -0.996269 
 -0.150510 -0.143937 -0.992537 
 -0.150510 -0.143356 -0.996269 
 -0.150510 -0.142774 -0.996269 
 -0.149235 -0.142774 -0.996269 
 -0.149235 -0.142192 -0.996269 
 -0.149235 -0.141611 -0.992537 
 -0.147959 -0.141611 -0.996269 
 -0.147959 -0.141029 -0.988806 
 -0.147959 -0.140448 -0.985075 
 -0.146684 -0.140448 -0.988806 
 -0.146684 -0.139866 -0.977612 
 -0.146684 -0.139285 -0.977612 
 -0.145408 -0.139285 -0.977612 
 -0.145408 -0.138703 -0.977612 
 -0.145408 -0.138122 -0.977612 
 -0.145408 -0.137540 -0.977612 
 -0.144133 -0.137540 -0.977612 
 -0.144133 -0.136958 -0.977612 
 -0.144133 -0.136377 -0.977612 
 -0.142857 -0.136377 -0.977612 
 -0.142857 -0.135795 -0.977612 
 -0.142857 -0.135214 -0.977612 
 -0.141582 -0.135214 -0.977612 
 -0.141582 -0.134632 -0.977612 
 -0.141582 -0.134051 -0.977612 
 -0.140306 -0.134051 -0.977612 
 -0.140306 -0.133469 -0.977612 
 -0.140306 -0.132887 -0.977612 
 -0.139031 -0.132887 -0.977612 
 -0.139031 -0.132306 -0.977612 
 -0.139031 -0.131724 -0.973881 
 -0.139031 -0.131143 -0.973881 
 -0.137755 -0.131143 -0.973881 
 -0.137755 -0.130561 -0.973881 
 -0.137755 -0.129980 -0.973881 
 -0.136480 -0.129980 -0.973881 
 -0.136480 -0.129398 -0.977612 
 -0.136480 -0.128817 -0.977612 
 -0.135204 -0.128817 -0.977612 
 -0.135204 -0.128235 -0.977612 
 -0.135204 -0.127653 -0.977612 
 -0.133929 -0.127653 -0.977612 
 -0.133929 -0.127072 -0.977612 
 -0.133929 -0.126490 -0.973881 
 -0.132653 -0.126490 -0.977612 
 -0.132653 -0.125909 -0.973881 
 -0.132653 -0.125327 -0.973881 
 -0.131378 -0.125327 -0.973881 
 -0.131378 -0.124746 -0.973881 
 -0.131378 -0.124164 -0.973881 
 -0.131378 -0.123582 -0.970149 
 -0.130102 -0.123582 -0.970149 
 -0.130102 -0.123001 -0.970149 
 -0.130102 -0.122419 -0.966418 
 -0.128827 -0.122419 -0.966418 
 -0.128827 -0.121838 -0.966418 
 -0.128827 -0.121256 -0.962687 
 -0.127551 -0.121256 -0.966418 
 -0.127551 -0.120675 -0.962687 
 -0.127551 -0.120093 -0.962687 
 -0.126276 -0.120093 -0.962687 
 -0.126276 -0.119511 -0.962687 
 -0.126276 -0.118930 -0.962687 
 -0.125000 -0.118930 -0.962687 
 -0.125000 -0.118348 -0.962687 
 -0.125000 -0.117767 -0.962687 
 -0.125000 -0.117185 -0.962687 
 -0.123724 -0.117185 -0.962687 
 -0.123724 -0.116604 -0.962687 
 -0.123724 -0.116022 -0.958955 
 -0.122449 -0.116022 -0.958955 
 -0.122449 -0.115441 -0.958955 
 -0.122449 -0.114859 -0.958955 
 -0.121173 -0.114859 -0.958955 
 -0.121173 -0.114277 -0.958955 
 -0.121173 -0.113696 -0.955224 
 -0.119898 -0.113696 -0.955224 
 -0.119898 -0.113114 -0.955224 
 -0.119898 -0.112533 -0.955224 
 -0.118622 -0.112533 -0.955224 
 -0.118622 -0.111951 -0.955224 
 -0.118622 -0.111370 -0.955224 
 -0.118622 -0.110788 -0.955224 
 -0.117347 -0.110788 -0.955224 
 -0.117347 -0.110206 -0.955224 
 -0.117347 -0.109625 -0.955224 
 -0.116071 -0.109625 -0.955224 
 -0.116071 -0.109043 -0.955224 
 -0.116071 -0.108462 -0.955224 
 -0.114796 -0.108462 -0.955224 
 -0.114796 -0.107880 -0.951493 
 -0.114796 -0.107299 -0.951493 
 -0.113520 -0.107299 -0.951493 
 -0.113520 -0.106717 -0.951493 
 -0.113520 -0.106136 -0.951493 
 -0.112245 -0.106136 -0.951493 
 -0.112245 -0.105554 -0.947761 
 -0.112245 -0.104972 -0.947761 
 -0.110969 -0.104391 -0.944030 
 -0.110969 -0.103809 -0.944030 
 -0.110969 -0.103228 -0.944030 
 -0.109694 -0.103228 -0.944030 
 -0.109694 -0.102646 -0.936567 
 -0.109694 -0.102065 -0.929104 
 -0.108418 -0.102065 -0.925373 
 -0.108418 -0.101483 -0.914179 
 -0.108418 -0.100901 -0.910448 
 -0.107143 -0.100901 -0.899254 
 -0.107143 -0.100320 -0.884328 
 -0.107143 -0.099738 -0.873134 
 -0.105867 -0.099738 -0.854478 
 -0.105867 -0.099157 -0.835821 
 -0.105867 -0.098575 -0.820896 
 -0.104592 -0.098575 -0.809701 
 -0.104592 -0.097994 -0.798507 
 -0.104592 -0.097412 -0.794776 
 -0.104592 -0.096830 -0.798507 
 -0.103316 -0.096830 -0.779851 
 -0.103316 -0.096249 -0.794776 
 -0.103316 -0.095667 -0.802239 
 -0.102041 -0.095667 -0.783582 
 -0.102041 -0.095086 -0.787313 
 -0.102041 -0.094504 -0.791045 
 -0.100765 -0.094504 -0.764925 
 -0.100765 -0.093923 -0.764925 
 -0.100765 -0.093341 -0.761194 
 -0.099490 -0.093341 -0.750000 
 -0.099490 -0.092760 -0.735075 
 -0.099490 -0.092178 -0.735075 
 -0.098214 -0.092178 -0.735075 
 -0.098214 -0.091596 -0.742537 
 -0.098214 -0.091015 -0.757463 
 -0.098214 -0.090433 -0.772388 
 -0.096939 -0.090433 -0.783582 
 -0.096939 -0.089852 -0.794776 
 -0.096939 -0.089270 -0.787313 
 -0.095663 -0.089270 -0.794776 
 -0.095663 -0.088689 -0.779851 
 -0.095663 -0.088107 -0.772388 
 -0.094388 -0.088107 -0.787313 
 -0.094388 -0.087525 -0.798507 
 -0.094388 -0.086944 -0.805970 
 -0.093112 -0.086944 -0.824627 
 -0.093112 -0.086362 -0.824627 
 -0.093112 -0.085781 -0.817164 
 -0.091837 -0.085781 -0.817164 
 -0.091837 -0.085199 -0.802239 
 -0.091837 -0.084618 -0.794776 
 -0.091837 -0.084036 -0.772388 
 -0.090561 -0.084036 -0.761194 
 -0.090561 -0.083454 -0.750000 
 -0.090561 -0.082873 -0.738806 
 -0.089286 -0.082873 -0.727612 
 -0.089286 -0.082291 -0.720149 
 -0.089286 -0.081710 -0.701493 
 -0.088010 -0.081710 -0.682836 
 -0.088010 -0.081128 -0.675373 
 -0.088010 -0.080547 -0.656716 
 -0.086735 -0.080547 -0.652985 
 -0.086735 -0.079965 -0.638060 
 -0.086735 -0.079384 -0.630597 
 -0.085459 -0.079384 -0.623134 
 -0.085459 -0.078802 -0.611940 
 -0.085459 -0.078220 -0.604478 
 -0.084184 -0.077639 -0.630597 
 -0.084184 -0.077057 -0.634328 
 -0.084184 -0.076476 -0.641791 
 -0.082908 -0.076476 -0.656716 
 -0.082908 -0.075894 -0.660448 
 -0.082908 -0.075313 -0.671642 
 -0.081633 -0.075313 -0.697761 
 -0.081633 -0.074731 -0.712687 
 -0.081633 -0.074149 -0.727612 
 -0.080357 -0.074149 -0.746269 
 -0.080357 -0.073568 -0.753731 
 -0.080357 -0.072986 -0.757463 
 -0.079082 -0.072986 -0.768657 
 -0.079082 -0.072405 -0.757463 
 -0.079082 -0.071823 -0.738806 
 -0.077806 -0.071823 -0.731343 
 -0.077806 -0.071242 -0.712687 
 -0.077806 -0.070660 -0.697761 
 -0.077806 -0.070079 -0.675373 
 -0.076531 -0.070079 -0.694030 
 -0.076531 -0.069497 -0.682836 
 -0.076531 -0.068915 -0.679104 
 -0.075255 -0.068915 -0.697761 
 -0.075255 -0.068334 -0.705224 
 -0.075255 -0.067752 -0.727612 
 -0.073980 -0.067752 -0.727612 
 -0.073980 -0.067171 -0.746269 
 -0.073980 -0.066589 -0.768657 
 -0.072704 -0.066589 -0.761194 
 -0.072704 -0.066008 -0.776119 
 -0.072704 -0.065426 -0.809701 
 -0.071429 -0.065426 -0.802239 
 -0.071429 -0.064844 -0.828358 
 -0.071429 -0.064263 -0.828358 
 -0.071429 -0.063681 -0.832090 
 -0.070153 -0.063681 -0.843284 
 -0.070153 -0.063100 -0.847015 
 -0.070153 -0.062518 -0.843284 
 -0.068878 -0.062518 -0.854478 
 -0.068878 -0.061937 -0.850746 
 -0.068878 -0.061355 -0.854478 
 -0.067602 -0.061355 -0.858209 
 -0.067602 -0.060773 -0.861940 
 -0.067602 -0.060192 -0.854478 
 -0.066327 -0.060192 -0.858209 
 -0.066327 -0.059610 -0.850746 
 -0.066327 -0.059029 -0.832090 
 -0.065051 -0.059029 -0.835821 
 -0.065051 -0.058447 -0.820896 
 -0.065051 -0.057866 -0.813433 
 -0.065051 -0.057284 -0.813433 
 -0.063776 -0.057284 -0.828358 
 -0.063776 -0.056703 -0.824627 
 -0.063776 -0.056121 -0.817164 
 -0.062500 -0.056121 -0.820896 
 -0.062500 -0.055539 -0.798507 
 -0.062500 -0.054958 -0.776119 
 -0.061224 -0.054958 -0.787313 
 -0.061224 -0.054376 -0.768657 
 -0.061224 -0.053795 -0.757463 
 -0.059949 -0.053795 -0.783582 
 -0.059949 -0.053213 -0.772388 
 -0.059949 -0.052632 -0.764925 
 -0.058673 -0.052632 -0.787313 
 -0.058673 -0.052050 -0.779851 
 -0.058673 -0.051468 -0.779851 
 -0.058673 -0.050887 -0.787313 
 -0.057398 -0.050887 -0.805970 
 -0.057398 -0.050305 -0.802239 
 -0.057398 -0.049724 -0.787313 
 -0.056122 -0.049724 -0.794776 
 -0.056122 -0.049142 -0.764925 
 -0.056122 -0.048561 -0.757463 
 -0.054847 -0.048561 -0.768657 
 -0.054847 -0.047979 -0.768657 
 -0.054847 -0.047397 -0.772388 
 -0.053571 -0.047397 -0.783582 
 -0.053571 -0.046816 -0.798507 
 -0.053571 -0.046234 -0.798507 
 -0.052296 -0.046234 -0.805970 
 -0.052296 -0.045653 -0.798507 
 -0.052296 -0.045071 -0.787313 
 -0.052296 -0.044490 -0.761194 
 -0.051020 -0.044490 -0.768657 
 -0.051020 -0.043908 -0.772388 
 -0.051020 -0.043327 -0.779851 
 -0.049745 -0.043327 -0.776119 
 -0.049745 -0.042745 -0.820896 
 -0.049745 -0.042163 -0.828358 
 -0.048469 -0.042163 -0.828358 
 -0.048469 -0.041582 -0.828358 
 -0.048469 -0.041000 -0.828358 
 -0.047194 -0.041000 -0.828358 
 -0.047194 -0.040419 -0.824627 
 -0.047194 -0.039837 -0.820896 
 -0.045918 -0.039837 -0.824627 
 -0.045918 -0.039256 -0.817164 
 -0.045918 -0.038674 -0.813433 
 -0.045918 -0.038092 -0.798507 
 -0.044643 -0.038092 -0.809701 
 -0.044643 -0.037511 -0.802239 
 -0.044643 -0.036929 -0.798507 
 -0.043367 -0.036929 -0.813433 
 -0.043367 -0.036348 -0.805970 
 -0.043367 -0.035766 -0.802239 
 -0.042092 -0.035766 -0.813433 
 -0.042092 -0.035185 -0.809701 
 -0.042092 -0.034603 -0.805970 
 -0.040816 -0.034603 -0.809701 
 -0.040816 -0.034022 -0.805970 
 -0.040816 -0.033440 -0.802239 
 -0.039541 -0.033440 -0.809701 
 -0.039541 -0.032858 -0.805970 
 -0.039541 -0.032277 -0.798507 
 -0.039541 -0.031695 -0.794776 
 -0.038265 -0.031695 -0.802239 
 -0.038265 -0.031114 -0.802239 
 -0.038265 -0.030532 -0.802239 
 -0.036990 -0.030532 -0.805970 
 -0.036990 -0.029951 -0.805970 
 -0.036990 -0.029369 -0.802239 
 -0.035714 -0.029369 -0.802239 
 -0.035714 -0.028787 -0.802239 
 -0.035714 -0.028206 -0.802239 
 -0.034439 -0.028206 -0.802239 
 -0.034439 -0.027624 -0.802239 
 -0.034439 -0.027043 -0.802239 
 -0.033163 -0.027043 -0.802239 
 -0.033163 -0.026461 -0.802239 
 -0.033163 -0.025880 -0.802239 
 -0.033163 -0.025298 -0.802239 
 -0.031888 -0.025298 -0.802239 
 -0.031888 -0.024716 -0.802239 
 -0.031888 -0.024135 -0.798507 
 -0.030612 -0.024135 -0.802239 
 -0.030612 -0.023553 -0.802239 
 -0.030612 -0.022972 -0.802239 
 -0.029337 -0.022972 -0.805970 
 -0.029337 -0.022390 -0.805970 
 -0.029337 -0.021809 -0.805970 
 -0.028061 -0.021809 -0.805970 
 -0.028061 -0.021227 -0.805970 
 -0.028061 -0.020646 -0.798507 
 -0.026786 -0.020646 -0.798507 
 -0.026786 -0.020064 -0.794776 
 -0.026786 -0.019482 -0.791045 
 -0.025510 -0.019482 -0.791045 
 -0.025510 -0.018901 -0.791045 
 -0.025510 -0.018319 -0.791045 
 -0.025510 -0.017738 -0.791045 
 -0.024235 -0.017738 -0.787313 
 -0.024235 -0.017156 -0.783582 
 -0.024235 -0.016575 -0.783582 
 -0.022959 -0.016575 -0.779851 
 -0.022959 -0.015993 -0.779851 
 -0.022959 -0.015411 -0.776119 
 -0.021684 -0.015411 -0.776119 
 -0.021684 -0.014830 -0.772388 
 -0.021684 -0.014248 -0.772388 
 -0.020408 -0.014248 -0.772388 
 -0.020408 -0.013667 -0.772388 
 -0.020408 -0.013085 -0.772388 
 -0.019133 -0.013085 -0.768657 
 -0.019133 -0.012504 -0.764925 
 -0.019133 -0.011922 -0.768657 
 -0.019133 -0.011341 -0.768657 
 -0.017857 -0.011341 -0.764925 
 -0.017857 -0.010759 -0.764925 
 -0.017857 -0.010177 -0.761194 
 -0.016582 -0.010177 -0.757463 
 -0.016582 -0.009596 -0.753731 
 -0.016582 -0.009014 -0.750000 
 -0.015306 -0.009014 -0.750000 
 -0.015306 -0.008433 -0.746269 
 -0.015306 -0.007851 -0.742537 
 -0.014031 -0.007851 -0.746269 
 -0.014031 -0.007270 -0.738806 
 -0.014031 -0.006688 -0.735075 
 -0.012755 -0.006688 -0.735075 
 -0.012755 -0.006106 -0.735075 
 -0.012755 -0.005525 -0.735075 
 -0.012755 -0.004943 -0.735075 
 -0.011480 -0.004943 -0.735075 
 -0.011480 -0.004362 -0.727612 
 -0.011480 -0.003780 -0.720149 
 -0.010204 -0.003780 -0.720149 
 -0.010204 -0.003199 -0.708955 
 -0.010204 -0.002617 -0.701493 
 -0.008929 -0.002617 -0.697761 
 -0.008929 -0.002035 -0.686567 
 -0.008929 -0.001454 -0.679104 
 -0.007653 -0.001454 -0.671642 
 -0.007653 -0.000872 -0.656716 
 -0.007653 -0.000291 -0.641791 
 -0.006378 -0.000291 -0.615672 
 -0.006378 0.000291 -0.585821 
 -0.006378 0.000872 -0.578358 
 -0.006378 0.001454 -0.567164 
 -0.005102 0.001454 -0.548507 
 -0.005102 0.002035 -0.537313 
 -0.005102 0.002617 -0.526119 
 -0.003827 0.002617 -0.511194 
 -0.003827 0.003199 -0.485075 
 -0.003827 0.003780 -0.473881 
 -0.002551 0.003780 -0.470149 
 -0.002551 0.004362 -0.447761 
 -0.002551 0.004943 -0.429104 
 -0.001276 0.004943 -0.429104 
 -0.001276 0.005525 -0.384328 
 -0.001276 0.006106 -0.358209 
 0.000000 0.006106 -0.361940 
 0.000000 0.006688 -0.313433 
 0.000000 0.007270 -0.283582 
 0.000000 0.007851 -0.253731 
 0.001276 0.007851 -0.272388 
 0.001276 0.008433 -0.242537 
 0.001276 0.009014 -0.220149 
 0.002551 0.009014 -0.220149 
 0.002551 0.009596 -0.197761 
 0.002551 0.010177 -0.182836 
 0.003827 0.010177 -0.164179 
 0.003827 0.010759 -0.156716 
 0.003827 0.011341 -0.156716 
 0.005102 0.011341 -0.126866 
 0.005102 0.011922 -0.130597 
 0.005102 0.012504 -0.126866 
 0.006378 0.012504 -0.100746 
 0.006378 0.013085 -0.097015 
 0.006378 0.013667 -0.100746 
 0.006378 0.014248 -0.108209 
 0.007653 0.014248 -0.070896 
 0.007653 0.014830 -0.074627 
 0.007653 0.015411 -0.082090 
 0.008929 0.015411 -0.033582 
 0.008929 0.015993 -0.033582 
 0.008929 0.016575 -0.037313 
 0.010204 0.016575 0.000000 
 0.010204 0.017156 -0.003731 
 0.010204 0.017738 -0.007463 
 0.011480 0.017738 0.026119 
 0.011480 0.018319 0.014925 
 0.011480 0.018901 -0.003731 
 0.012755 0.018901 0.033582 
 0.012755 0.019482 0.026119 
 0.012755 0.020064 0.014925 
 0.012755 0.020646 0.014925 
 0.014031 0.020646 0.041045 
 0.014031 0.021227 0.052239 
 0.014031 0.021809 0.082090 
 0.015306 0.021809 0.130597 
 0.015306 0.022390 0.152985 
 0.015306 0.022972 0.167910 
 0.016582 0.022972 0.201493 
 0.016582 0.023553 0.212687 
 0.016582 0.024135 0.231343 
 0.017857 0.024135 0.261194 
 0.017857 0.024716 0.261194 
 0.017857 0.025298 0.257463 
 0.019133 0.025298 0.283582 
 0.019133 0.025880 0.291045 
 0.019133 0.026461 0.328358 
 0.020408 0.027043 0.369403 
 0.020408 0.027624 0.402985 
 0.020408 0.028206 0.432836 
 0.021684 0.028206 0.466418 
 0.021684 0.028787 0.511194 
 0.021684 0.029369 0.537313 
 0.022959 0.029369 0.555970 
 0.022959 0.029951 0.578358 
 0.022959 0.030532 0.589552 
 0.024235 0.030532 0.597015 
 0.024235 0.031114 0.585821 
 0.024235 0.031695 0.555970 
 0.025510 0.031695 0.548507 
 0.025510 0.032277 0.526119 
 0.025510 0.032858 0.500000 
 0.026786 0.032858 0.492537 
 0.026786 0.033440 0.470149 
 0.026786 0.034022 0.447761 
 0.026786 0.034603 0.436567 
 0.028061 0.034603 0.417910 
 0.028061 0.035185 0.406716 
 0.028061 0.035766 0.406716 
 0.029337 0.035766 0.388060 
 0.029337 0.036348 0.399254 
 0.029337 0.036929 0.417910 
 0.030612 0.036929 0.399254 
 0.030612 0.037511 0.440299 
 0.030612 0.038092 0.462687 
 0.031888 0.038092 0.444030 
 0.031888 0.038674 0.458955 
 0.031888 0.039256 0.466418 
 0.033163 0.039256 0.440299 
 0.033163 0.039837 0.440299 
 0.033163 0.040419 0.436567 
 0.033163 0.041000 0.436567 
 0.034439 0.041000 0.417910 
 0.034439 0.041582 0.440299 
 0.034439 0.042163 0.466418 
 0.035714 0.042163 0.447761 
 0.035714 0.042745 0.473881 
 0.035714 0.043327 0.496269 
 0.036990 0.043327 0.477612 
 0.036990 0.043908 0.514925 
 0.036990 0.044490 0.533582 
 0.038265 0.044490 0.511194 
 0.038265 0.045071 0.537313 
 0.038265 0.045653 0.548507 
 0.039541 0.045653 0.522388 
 0.039541 0.046234 0.537313 
 0.039541 0.046816 0.541045 
 0.039541 0.047397 0.537313 
 0.040816 0.047397 0.514925 
 0.040816 0.047979 0.514925 
 0.040816 0.048561 0.511194 
 0.042092 0.048561 0.514925 
 0.042092 0.049142 0.503731 
 0.042092 0.049724 0.492537 
 0.043367 0.049724 0.500000 
 0.043367 0.050305 0.473881 
 0.043367 0.050887 0.455224 
 0.044643 0.050887 0.440299 
 0.044643 0.051468 0.402985 
 0.044643 0.052050 0.376866 
 0.045918 0.052050 0.358209 
 0.045918 0.052632 0.305970 
 0.045918 0.053213 0.276119 
 0.045918 0.053795 0.242537 
 0.047194 0.053795 0.220149 
 0.047194 0.054376 0.208955 
 0.047194 0.054958 0.190299 
 0.048469 0.054958 0.167910 
 0.048469 0.055539 0.152985 
 0.048469 0.056121 0.138060 
 0.049745 0.056121 0.115672 
 0.049745 0.056703 0.104478 
 0.049745 0.057284 0.097015 
 0.051020 0.057284 0.059701 
 0.051020 0.057866 0.052239 
 0.051020 0.058447 0.052239 
 0.052296 0.058447 0.026119 
 0.052296 0.059029 0.029851 
 0.052296 0.059610 0.026119 
 0.052296 0.060192 0.014925 
 0.053571 0.060192 0.003731 
 0.053571 0.060773 -0.007463 
 0.053571 0.061355 -0.044776 
 0.054847 0.061355 -0.044776 
 0.054847 0.061937 -0.074627 
 0.054847 0.062518 -0.104478 
 0.056122 0.062518 -0.104478 
 0.056122 0.063100 -0.130597 
 0.056122 0.063681 -0.156716 
 0.057398 0.063681 -0.160448 
 0.057398 0.064263 -0.179104 
 0.057398 0.064844 -0.205224 
 0.058673 0.064844 -0.208955 
 0.058673 0.065426 -0.227612 
 0.058673 0.066008 -0.242537 
 0.058673 0.066589 -0.261194 
 0.059949 0.066589 -0.264925 
 0.059949 0.067171 -0.276119 
 0.059949 0.067752 -0.287313 
 0.061224 0.067752 -0.294776 
 0.061224 0.068334 -0.313433 
 0.061224 0.068915 -0.328358 
 0.062500 0.068915 -0.335821 
 0.062500 0.069497 -0.343284 
 0.062500 0.070079 -0.354478 
 0.063776 0.070079 -0.361940 
 0.063776 0.070660 -0.369403 
 0.063776 0.071242 -0.380597 
 0.065051 0.071242 -0.391791 
 0.065051 0.071823 -0.402985 
 0.065051 0.072405 -0.417910 
 0.065051 0.072986 -0.417910 
 0.066327 0.072986 -0.417910 
 0.066327 0.073568 -0.410448 
 0.066327 0.074149 -0.406716 
 0.067602 0.074149 -0.395522 
 0.067602 0.074731 -0.391791 
 0.067602 0.075313 -0.388060 
 0.068878 0.075313 -0.373134 
 0.068878 0.075894 -0.365672 
 0.068878 0.076476 -0.347015 
 0.070153 0.076476 -0.324627 
 0.070153 0.077057 -0.317164 
 0.070153 0.077639 -0.313433 
 0.071429 0.077639 -0.291045 
 0.071429 0.078220 -0.283582 
 0.071429 0.078802 -0.261194 
 0.071429 0.079384 -0.253731 
 0.072704 0.079384 -0.227612 
 0.072704 0.079965 -0.208955 
 0.072704 0.080547 -0.197761 
 0.073980 0.080547 -0.171642 
 0.073980 0.081128 -0.186567 
 0.073980 0.081710 -0.201493 
 0.075255 0.081710 -0.182836 
 0.075255 0.082291 -0.208955 
 0.075255 0.082873 -0.223881 
 0.076531 0.082873 -0.201493 
 0.076531 0.083454 -0.208955 
 0.076531 0.084036 -0.190299 
 0.077806 0.084036 -0.171642 
 0.077806 0.084618 -0.149254 
 0.077806 0.085199 -0.115672 
 0.077806 0.085781 -0.104478 
 0.079082 0.085781 -0.085821 
 0.079082 0.086362 -0.074627 
 0.079082 0.086944 -0.082090 
 0.080357 0.086944 -0.052239 
 0.080357 0.087525 -0.070896 
 0.080357 0.088107 -0.082090 
 0.081633 0.088107 -0.059701 
 0.081633 0.088689 -0.063433 
 0.081633 0.089270 -0.063433 
 0.082908 0.089270 -0.007463 
 0.082908 0.089852 0.003731 
 0.082908 0.090433 0.014925 
 0.084184 0.091015 0.067164 
 0.084184 0.091596 0.055970 
 0.084184 0.092178 0.037313 
 0.085459 0.092178 0.055970 
 0.085459 0.092760 0.048507 
 0.085459 0.093341 0.048507 
 0.086735 0.093341 0.078358 
 0.086735 0.093923 0.070896 
 0.086735 0.094504 0.067164 
 0.088010 0.094504 0.089552 
 0.088010 0.095086 0.070896 
 0.088010 0.095667 0.041045 
 0.089286 0.095667 0.059701 
 0.089286 0.096249 -0.007463 
 0.089286 0.096830 -0.037313 
 0.089286 0.097412 -0.078358 
 0.090561 0.097412 -0.059701 
 0.090561 0.097994 -0.089552 
 0.090561 0.098575 -0.130597 
 0.091837 0.098575 -0.115672 
 0.091837 0.099157 -0.141791 
 0.091837 0.099738 -0.149254 
 0.093112 0.099738 -0.115672 
 0.093112 0.100320 -0.104478 
 0.093112 0.100901 -0.093284 
 0.094388 0.100901 -0.029851 
 0.094388 0.101483 -0.026119 
 0.094388 0.102065 -0.029851 
 0.095663 0.102065 -0.011194 
 0.095663 0.102646 -0.018657 
 0.095663 0.103228 -0.037313 
 0.095663 0.103809 -0.078358 
 0.096939 0.103809 -0.074627 
 0.096939 0.104391 -0.100746 
 0.096939 0.104972 -0.145522 
 0.098214 0.104972 -0.115672 
 0.098214 0.105554 -0.123134 
 0.098214 0.106136 -0.138060 
 0.099490 0.106136 -0.108209 
 0.099490 0.106717 -0.123134 
 0.099490 0.107299 -0.138060 
 0.100765 0.107299 -0.111940 
 0.100765 0.107880 -0.130597 
 0.100765 0.108462 -0.160448 
 0.102041 0.108462 -0.145522 
 0.102041 0.109043 -0.164179 
 0.102041 0.109625 -0.201493 
 0.102041 0.110206 -0.231343 
 0.103316 0.110206 -0.220149 
 0.103316 0.110788 -0.257463 
 0.103316 0.111370 -0.253731 
 0.104592 0.111370 -0.231343 
 0.104592 0.111951 -0.216418 
 0.104592 0.112533 -0.179104 
 0.105867 0.112533 -0.149254 
 0.105867 0.113114 -0.123134 
 0.105867 0.113696 -0.093284 
 0.107143 0.113696 -0.070896 
 0.107143 0.114277 -0.089552 
 0.107143 0.114859 -0.123134 
 0.108418 0.114859 -0.097015 
 0.108418 0.115441 -0.115672 
 0.108418 0.116022 -0.145522 
 0.108418 0.116604 -0.160448 
 0.109694 0.116604 -0.141791 
 0.109694 0.117185 -0.182836 
 0.109694 0.117767 -0.212687 
 0.110969 0.117767 -0.208955 
 0.110969 0.118348 -0.238806 
 0.110969 0.118930 -0.238806 
 0.112245 0.118930 -0.216418 
 0.112245 0.119511 -0.216418 
 0.112245 0.120093 -0.227612 
 0.113520 0.120093 -0.205224 
 0.113520 0.120675 -0.227612 
 0.113520 0.121256 -0.261194 
 0.113520 0.121838 -0.272388 
 0.114796 0.121838 -0.246269 
 0.114796 0.122419 -0.231343 
 0.114796 0.123001 -0.231343 
 0.116071 0.123001 -0.216418 
 0.116071 0.123582 -0.242537 
 0.116071 0.124164 -0.257463 
 0.117347 0.124164 -0.253731 
 0.117347 0.124746 -0.268657 
 0.117347 0.125327 -0.276119 
 0.118622 0.125327 -0.261194 
 0.118622 0.125909 -0.276119 
 0.118622 0.126490 -0.287313 
 0.119898 0.126490 -0.279851 
 0.119898 0.127072 -0.320896 
 0.119898 0.127653 -0.332090 
 0.119898 0.128235 -0.317164 
 0.121173 0.128235 -0.291045 
 0.121173 0.128817 -0.268657 
 0.121173 0.129398 -0.261194 
 0.122449 0.129398 -0.238806 
 0.122449 0.129980 -0.242537 
 0.122449 0.130561 -0.250000 
 0.123724 0.130561 -0.223881 
 0.123724 0.131143 -0.235075 
 0.123724 0.131724 -0.242537 
 0.125000 0.131724 -0.212687 
 0.125000 0.132306 -0.227612 
 0.125000 0.132887 -0.246269 
 0.125000 0.133469 -0.283582 
 0.126276 0.133469 -0.268657 
 0.126276 0.134051 -0.294776 
 0.126276 0.134632 -0.309701 
 0.127551 0.134632 -0.291045 
 0.127551 0.135214 -0.279851 
 0.127551 0.135795 -0.250000 
 0.128827 0.135795 -0.235075 
 0.128827 0.136377 -0.205224 
 0.128827 0.136958 -0.164179 
 0.130102 0.136958 -0.145522 
 0.130102 0.137540 -0.111940 
 0.130102 0.138122 -0.082090 
 0.131378 0.138122 -0.067164 
 0.131378 0.138703 -0.052239 
 0.131378 0.139285 -0.048507 
 0.131378 0.139866 -0.059701 
 0.132653 0.139866 -0.052239 
 0.132653 0.140448 -0.070896 
 0.132653 0.141029 -0.104478 
 0.133929 0.141029 -0.111940 
 0.133929 0.141611 -0.141791 
 0.133929 0.142192 -0.179104 
 0.135204 0.142192 -0.186567 
 0.135204 0.142774 -0.208955 
 0.135204 0.143356 -0.246269 
 0.136480 0.143356 -0.242537 
 0.136480 0.143937 -0.246269 
 0.136480 0.144519 -0.238806 
 0.136480 0.145100 -0.235075 
 0.137755 0.145100 -0.208955 
 0.137755 0.145682 -0.201493 
 0.137755 0.146263 -0.197761 
 0.139031 0.146263 -0.167910 
 0.139031 0.146845 -0.171642 
 0.139031 0.147427 -0.182836 
 0.140306 0.147427 -0.160448 
 0.140306 0.148008 -0.182836 
 0.140306 0.148590 -0.220149 
 0.141582 0.148590 -0.190299 
 0.141582 0.149171 -0.208955 
 0.141582 0.149753 -0.220149 
 0.142857 0.149753 -0.190299 
 0.142857 0.150334 -0.194030 
 0.142857 0.150916 -0.197761 
 0.142857 0.151498 -0.197761 
 0.144133 0.151498 -0.171642 
 0.144133 0.152079 -0.175373 
 0.144133 0.152661 -0.179104 
 0.145408 0.152661 -0.167910 
 0.145408 0.153242 -0.186567 
 0.145408 0.153824 -0.197761 
 0.146684 0.153824 -0.201493 
 0.146684 0.154405 -0.231343 
 0.146684 0.154987 -0.246269 
 0.147959 0.154987 -0.253731 
 0.147959 0.155568 -0.276119 
 0.147959 0.156150 -0.291045 
 0.147959 0.156732 -0.317164 
 0.149235 0.156732 -0.328358 
 0.149235 0.157313 -0.347015 
 0.149235 0.157895 -0.361940 
 0.150510 0.157895 -0.388060 
 0.150510 0.158476 -0.402985 
 0.150510 0.159058 -0.414179 
 0.151786 0.159058 -0.432836 
 0.151786 0.159639 -0.447761 
 0.151786 0.160221 -0.455224 
 0.153061 0.160221 -0.470149 
 0.153061 0.160803 -0.477612 
 0.153061 0.161384 -0.485075 
 0.154337 0.161966 -0.507463 
 0.154337 0.162547 -0.522388 
 0.154337 0.163129 -0.541045 
 0.155612 0.163129 -0.555970 
 0.155612 0.163710 -0.570896 
 0.155612 0.164292 -0.585821 
 0.156888 0.164292 -0.589552 
 0.156888 0.164874 -0.597015 
 0.156888 0.165455 -0.608209 
 0.158163 0.165455 -0.608209 
 0.158163 0.166037 -0.615672 
 0.158163 0.166618 -0.619403 
 0.159439 0.166618 -0.619403 
 0.159439 0.167200 -0.623134 
 0.159439 0.167781 -0.626866 
 0.159439 0.168363 -0.630597 
 0.160714 0.168363 -0.630597 
 0.160714 0.168944 -0.634328 
 0.160714 0.169526 -0.638060 
 0.161990 0.169526 -0.638060 
 0.161990 0.170108 -0.641791 
 0.161990 0.170689 -0.641791 
 0.163265 0.170689 -0.641791 
 0.163265 0.171271 -0.641791 
 0.163265 0.171852 -0.641791 
 0.164541 0.171852 -0.638060 
 0.164541 0.172434 -0.638060 
 0.164541 0.173015 -0.634328 
 0.164541 0.173597 -0.634328 
 0.165816 0.173597 -0.630597 
 0.165816 0.174179 -0.630597 
 0.165816 0.174760 -0.626866 
 0.167092 0.174760 -0.619403 
 0.167092 0.175342 -0.608209 
 0.167092 0.175923 -0.600746 
 0.168367 0.175923 -0.582090 
 0.168367 0.176505 -0.567164 
 0.168367 0.177086 -0.548507 
 0.169643 0.177086 -0.526119 
 0.169643 0.177668 -0.518657 
 0.169643 0.178249 -0.511194 
 0.170918 0.178831 -0.481343 
 0.170918 0.179413 -0.447761 
 0.170918 0.179994 -0.425373 
 0.172194 0.179994 -0.402985 
 0.172194 0.180576 -0.388060 
 0.172194 0.181157 -0.384328 
 0.173469 0.181157 -0.358209 
 0.173469 0.181739 -0.343284 
 0.173469 0.182320 -0.339552 
 0.174745 0.182320 -0.317164 
 0.174745 0.182902 -0.298507 
 0.174745 0.183484 -0.268657 
 0.176020 0.183484 -0.246269 
 0.176020 0.184065 -0.208955 
 0.176020 0.184647 -0.179104 
 0.176020 0.185228 -0.123134 
 0.177296 0.185228 -0.126866 
 0.177296 0.185810 -0.078358 
 0.177296 0.186391 -0.052239 
 0.178571 0.186391 -0.029851 
 0.178571 0.186973 -0.003731 
 0.178571 0.187555 -0.003731 
 0.179847 0.187555 0.011194 
 0.179847 0.188136 0.011194 
 0.179847 0.188718 0.007463 
 0.181122 0.188718 0.029851 
 0.181122 0.189299 0.029851 
 0.181122 0.189881 0.029851 
 0.181122 0.190462 0.026119 
 0.182398 0.190462 0.052239 
 0.182398 0.191044 0.041045 
 0.182398 0.191625 0.026119 
 0.183673 0.191625 0.048507 
 0.183673 0.192207 0.037313 
 0.183673 0.192789 0.022388 
 0.184949 0.192789 0.037313 
 0.184949 0.193370 0.026119 
 0.184949 0.193952 0.018657 
 0.186224 0.193952 0.033582 
 0.186224 0.194533 0.018657 
 0.186224 0.195115 0.011194 
 0.187500 0.195115 0.022388 
 0.187500 0.195696 0.011194 
 0.187500 0.196278 0.003731 
 0.187500 0.196860 -0.018657 
 0.188776 0.196860 -0.007463 
 0.188776 0.197441 -0.018657 
 0.188776 0.198023 -0.048507 
 0.190051 0.198023 -0.033582 
 0.190051 0.198604 -0.055970 
 0.190051 0.199186 -0.085821 
 0.191327 0.199186 -0.078358 
 0.191327 0.199767 -0.097015 
 0.191327 0.200349 -0.130597 
 0.192602 0.200349 -0.119403 
 0.192602 0.200931 -0.134328 
 0.192602 0.201512 -0.160448 
 0.192602 0.202094 -0.175373 
 0.193878 0.202094 -0.167910 
 0.193878 0.202675 -0.194030 
 0.193878 0.203257 -0.212687 
 0.195153 0.203257 -0.201493 
 0.195153 0.203838 -0.223881 
 0.195153 0.204420 -0.253731 
 0.196429 0.204420 -0.246269 
 0.196429 0.205001 -0.257463 
 0.196429 0.205583 -0.235075 
 0.197704 0.205583 -0.231343 
 0.197704 0.206165 -0.205224 
 0.197704 0.206746 -0.179104 
 0.198980 0.206746 -0.175373 
 0.198980 0.207328 -0.152985 
 0.198980 0.207909 -0.111940 
 0.198980 0.208491 -0.097015 
 0.200255 0.208491 -0.089552 
 0.200255 0.209072 -0.059701 
 0.200255 0.209654 -0.037313 
 0.201531 0.209654 -0.018657 
 0.201531 0.210236 0.011194 
 0.201531 0.210817 0.029851 
 0.202806 0.210817 0.041045 
 0.202806 0.211399 0.074627 
 0.202806 0.211980 0.089552 
 0.204082 0.211980 0.104478 
 0.204082 0.212562 0.123134 
 0.204082 0.213143 0.164179 
 0.204082 0.213725 0.186567 
 0.205357 0.213725 0.194030 
 0.205357 0.214306 0.231343 
 0.205357 0.214888 0.257463 
 0.206633 0.214888 0.272388 
 0.206633 0.215470 0.302239 
 0.206633 0.216051 0.317164 
 0.207908 0.216051 0.328358 
 0.207908 0.216633 0.358209 
 0.207908 0.217214 0.369403 
 0.209184 0.217214 0.388060 
 0.209184 0.217796 0.395522 
 0.209184 0.218377 0.395522 
 0.210459 0.218377 0.421642 
 0.210459 0.218959 0.417910 
 0.210459 0.219541 0.410448 
 0.210459 0.220122 0.399254 
 0.211735 0.220122 0.429104 
 0.211735 0.220704 0.425373 
 0.211735 0.221285 0.425373 
 0.213010 0.221285 0.458955 
 0.213010 0.221867 0.466418 
 0.213010 0.222448 0.477612 
 0.214286 0.222448 0.503731 
 0.214286 0.223030 0.518657 
 0.214286 0.223612 0.533582 
 0.215561 0.223612 0.552239 
 0.215561 0.224193 0.537313 
 0.215561 0.224775 0.514925 
 0.216837 0.224775 0.488806 
 0.216837 0.225356 0.444030 
 0.216837 0.225938 0.417910 
 0.216837 0.226519 0.380597 
 0.218112 0.226519 0.361940 
 0.218112 0.227101 0.335821 
 0.218112 0.227682 0.298507 
 0.219388 0.227682 0.287313 
 0.219388 0.228264 0.268657 
 0.219388 0.228846 0.227612 
 0.220663 0.228846 0.212687 
 0.220663 0.229427 0.190299 
 0.220663 0.230009 0.156716 
 0.221939 0.230009 0.171642 
 0.221939 0.230590 0.160448 
 0.221939 0.231172 0.149254 
 0.223214 0.231753 0.167910 
 0.223214 0.232335 0.160448 
 0.223214 0.232917 0.149254 
 0.224490 0.232917 0.175373 
 0.224490 0.233498 0.167910 
 0.224490 0.234080 0.156716 
 0.225765 0.234080 0.175373 
 0.225765 0.234661 0.167910 
 0.225765 0.235243 0.149254 
 0.227041 0.235243 0.167910 
 0.227041 0.235824 0.156716 
 0.227041 0.236406 0.130597 
 0.228316 0.236406 0.149254 
 0.228316 0.236987 0.134328 
 0.228316 0.237569 0.111940 
 0.229592 0.238151 0.111940 
 0.229592 0.238732 0.082090 
 0.229592 0.239314 0.063433 
 0.230867 0.239314 0.074627 
 0.230867 0.239895 0.052239 
 0.230867 0.240477 0.022388 
 0.232143 0.240477 0.022388 
 0.232143 0.241058 0.003731 
 0.232143 0.241640 -0.022388 
 0.233418 0.241640 -0.044776 
 0.233418 0.242222 -0.074627 
 0.233418 0.242803 -0.111940 
 0.234694 0.242803 -0.123134 
 0.234694 0.243385 -0.149254 
 0.234694 0.243966 -0.175373 
 0.235969 0.244548 -0.164179 
 0.235969 0.245129 -0.152985 
 0.235969 0.245711 -0.141791 
 0.237245 0.245711 -0.108209 
 0.237245 0.246293 -0.097015 
 0.237245 0.246874 -0.097015 
 0.238520 0.246874 -0.074627 
 0.238520 0.247456 -0.082090 
 0.238520 0.248037 -0.097015 
 0.239796 0.248037 -0.074627 
 0.239796 0.248619 -0.097015 
 0.239796 0.249200 -0.108209 
 0.241071 0.249200 -0.082090 
 0.241071 0.249782 -0.093284 
 0.241071 0.250363 -0.111940 
 0.242347 0.250363 -0.123134 
 0.242347 0.250945 -0.141791 
 0.242347 0.251527 -0.171642 
 0.242347 0.252108 -0.201493 
 0.243622 0.252108 -0.205224 
 0.243622 0.252690 -0.227612 
 0.243622 0.253271 -0.238806 
 0.244898 0.253271 -0.235075 
 0.244898 0.253853 -0.238806 
 0.244898 0.254434 -0.238806 
 0.246173 0.254434 -0.220149 
 0.246173 0.255016 -0.220149 
 0.246173 0.255598 -0.216418 
 0.247449 0.255598 -0.190299 
 0.247449 0.256179 -0.175373 
 0.247449 0.256761 -0.164179 
 0.248724 0.256761 -0.126866 
 0.248724 0.257342 -0.115672 
 0.248724 0.257924 -0.111940 
 0.248724 0.258505 -0.111940 
 0.250000 0.258505 -0.093284 
 0.250000 0.259087 -0.093284 
 0.250000 0.259669 -0.093284 
 0.251276 0.259669 -0.074627 
 0.251276 0.260250 -0.074627 
 0.251276 0.260832 -0.074627 
 0.252551 0.260832 -0.055970 
 0.252551 0.261413 -0.055970 
 0.252551 0.261995 -0.052239 
 0.253827 0.261995 -0.029851 
 0.253827 0.262576 -0.014925 
 0.253827 0.263158 0.007463 
 0.255102 0.263158 0.022388 
 0.255102 0.263739 0.041045 
 0.255102 0.264321 0.048507 
 0.255102 0.264903 0.070896 
 0.256378 0.264903 0.089552 
 0.256378 0.265484 0.097015 
 0.256378 0.266066 0.104478 
 0.257653 0.266066 0.119403 
 0.257653 0.266647 0.126866 
 0.257653 0.267229 0.138060 
 0.258929 0.267229 0.175373 
 0.258929 0.267810 0.182836 
 0.258929 0.268392 0.194030 
 0.260204 0.268392 0.216418 
 0.260204 0.268974 0.231343 
 0.260204 0.269555 0.238806 
 0.261480 0.269555 0.257463 
 0.261480 0.270137 0.272388 
 0.261480 0.270718 0.279851 
 0.262755 0.270718 0.287313 
 0.262755 0.271300 0.279851 
 0.262755 0.271881 0.276119 
 0.262755 0.272463 0.261194 
 0.264031 0.272463 0.223881 
 0.264031 0.273044 0.205224 
 0.264031 0.273626 0.182836 
 0.265306 0.273626 0.156716 
 0.265306 0.274208 0.138060 
 0.265306 0.274789 0.123134 
 0.266582 0.274789 0.108209 
 0.266582 0.275371 0.100746 
 0.266582 0.275952 0.085821 
 0.267857 0.275952 0.059701 
 0.267857 0.276534 0.048507 
 0.267857 0.277115 0.033582 
 0.269133 0.277115 0.007463 
 0.269133 0.277697 -0.014925 
 0.269133 0.278279 -0.011194 
 0.269133 0.278860 -0.003731 
 0.270408 0.278860 -0.029851 
 0.270408 0.279442 -0.022388 
 0.270408 0.280023 -0.011194 
 0.271684 0.280023 -0.033582 
 0.271684 0.280605 -0.029851 
 0.271684 0.281186 -0.026119 
 0.272959 0.281186 -0.052239 
 0.272959 0.281768 -0.063433 
 0.272959 0.282350 -0.078358 
 0.274235 0.282350 -0.097015 
 0.274235 0.282931 -0.108209 
 0.274235 0.283513 -0.126866 
 0.275510 0.283513 -0.145522 
 0.275510 0.284094 -0.145522 
 0.275510 0.284676 -0.141791 
 0.276786 0.284676 -0.179104 
 0.276786 0.285257 -0.179104 
 0.276786 0.285839 -0.175373 
 0.276786 0.286420 -0.160448 
 0.278061 0.286420 -0.186567 
 0.278061 0.287002 -0.171642 
 0.278061 0.287584 -0.141791 
 0.279337 0.287584 -0.160448 
 0.279337 0.288165 -0.141791 
 0.279337 0.288747 -0.111940 
 0.280612 0.288747 -0.126866 
 0.280612 0.289328 -0.115672 
 0.280612 0.289910 -0.119403 
 0.281888 0.289910 -0.149254 
 0.281888 0.290491 -0.152985 
 0.281888 0.291073 -0.164179 
 0.283163 0.291073 -0.182836 
 0.283163 0.291655 -0.186567 
 0.283163 0.292236 -0.179104 
 0.284439 0.292236 -0.201493 
 0.284439 0.292818 -0.186567 
 0.284439 0.293399 -0.152985 
 0.284439 0.293981 -0.141791 
 0.285714 0.293981 -0.152985 
 0.285714 0.294562 -0.126866 
 0.285714 0.295144 -0.104478 
 0.286990 0.295144 -0.111940 
 0.286990 0.295726 -0.082090 
 0.286990 0.296307 -0.067164 
 0.288265 0.296307 -0.104478 
 0.288265 0.296889 -0.111940 
 0.288265 0.297470 -0.119403 
 0.289541 0.297470 -0.149254 
 0.289541 0.298052 -0.156716 
 0.289541 0.298633 -0.167910 
 0.290816 0.298633 -0.194030 
 0.290816 0.299215 -0.212687 
 0.290816 0.299796 -0.223881 
 0.290816 0.300378 -0.223881 
 0.292092 0.300378 -0.242537 
 0.292092 0.300960 -0.242537 
 0.292092 0.301541 -0.242537 
 0.293367 0.301541 -0.257463 
 0.293367 0.302123 -0.257463 
 0.293367 0.302704 -0.257463 
 0.294643 0.302704 -0.272388 
 0.294643 0.303286 -0.276119 
 0.294643 0.303867 -0.279851 
 0.295918 0.303867 -0.305970 
 0.295918 0.304449 -0.309701 
 0.295918 0.305031 -0.317164 
 0.297194 0.305031 -0.328358 
 0.297194 0.305612 -0.335821 
 0.297194 0.306194 -0.350746 
 0.298469 0.306194 -0.361940 
 0.298469 0.306775 -0.380597 
 0.298469 0.307357 -0.406716 
 0.298469 0.307938 -0.429104 
 0.299745 0.307938 -0.436567 
 0.299745 0.308520 -0.462687 
 0.299745 0.309101 -0.481343 
 0.301020 0.309101 -0.488806 
 0.301020 0.309683 -0.511194 
 0.301020 0.310265 -0.526119 
 0.302296 0.310265 -0.533582 
 0.302296 0.310846 -0.552239 
 0.302296 0.311428 -0.559701 
 0.303571 0.311428 -0.559701 
 0.303571 0.312009 -0.570896 
 0.303571 0.312591 -0.589552 
 0.304847 0.312591 -0.589552 
 0.304847 0.313172 -0.626866 
 0.304847 0.313754 -0.641791 
 0.306122 0.313754 -0.645522 
 0.306122 0.314336 -0.664179 
 0.306122 0.314917 -0.690299 
 0.306122 0.315499 -0.705224 
 0.307398 0.315499 -0.705224 
 0.307398 0.316080 -0.716418 
 0.307398 0.316662 -0.716418 
 0.308673 0.316662 -0.716418 
 0.308673 0.317243 -0.716418 
 0.308673 0.317825 -0.716418 
 0.309949 0.317825 -0.716418 
 0.309949 0.318407 -0.716418 
 0.309949 0.318988 -0.716418 
 0.311224 0.318988 -0.716418 
 0.311224 0.319570 -0.716418 
 0.311224 0.320151 -0.716418 
 0.312500 0.320151 -0.716418 
 0.312500 0.320733 -0.716418 
 0.312500 0.321314 -0.716418 
 0.313776 0.321314 -0.716418 
 0.313776 0.321896 -0.716418 
 0.313776 0.322477 -0.716418 
 0.313776 0.323059 -0.716418 
 0.315051 0.323059 -0.716418 
 0.315051 0.323641 -0.716418 
 0.315051 0.324222 -0.716418 
 0.316327 0.324222 -0.716418 
 0.316327 0.324804 -0.716418 
 0.316327 0.325385 -0.716418 
 0.317602 0.325385 -0.716418 
 0.317602 0.325967 -0.716418 
 0.317602 0.326548 -0.716418 
 0.318878 0.326548 -0.716418 
 0.318878 0.327130 -0.716418 
 0.318878 0.327712 -0.716418 
 0.320153 0.327712 -0.716418 
 0.320153 0.328293 -0.716418 
 0.320153 0.328875 -0.716418 
 0.321429 0.328875 -0.716418 
 0.321429 0.329456 -0.712687 
 0.321429 0.330038 -0.701493 
 0.321429 0.330619 -0.686567 
 0.322704 0.330619 -0.686567 
 0.322704 0.331201 -0.675373 
 0.322704 0.331782 -0.664179 
 0.323980 0.331782 -0.664179 
 0.323980 0.332364 -0.649254 
 0.323980 0.332946 -0.641791 
 0.325255 0.332946 -0.641791 
 0.325255 0.333527 -0.615672 
 0.325255 0.334109 -0.600746 
 0.326531 0.334109 -0.600746 
 0.326531 0.334690 -0.574627 
 0.326531 0.335272 -0.563433 
 0.327806 0.335272 -0.563433 
 0.327806 0.335853 -0.544776 
 0.327806 0.336435 -0.529851 
 0.329082 0.336435 -0.533582 
 0.329082 0.337017 -0.526119 
 0.329082 0.337598 -0.518657 
 0.329082 0.338180 -0.511194 
 0.330357 0.338180 -0.529851 
 0.330357 0.338761 -0.514925 
 0.330357 0.339343 -0.466418 
 0.331633 0.339343 -0.473881 
 0.331633 0.339924 -0.455224 
 0.331633 0.340506 -0.406716 
 0.332908 0.340506 -0.425373 
 0.332908 0.341088 -0.395522 
 0.332908 0.341669 -0.373134 
 0.334184 0.341669 -0.399254 
 0.334184 0.342251 -0.369403 
 0.334184 0.342832 -0.328358 
 0.335459 0.342832 -0.380597 
 0.335459 0.343414 -0.332090 
 0.335459 0.343995 -0.324627 
 0.336735 0.344577 -0.332090 
 0.336735 0.345158 -0.313433 
 0.336735 0.345740 -0.302239 
 0.338010 0.345740 -0.335821 
 0.338010 0.346322 -0.335821 
 0.338010 0.346903 -0.339552 
 0.339286 0.346903 -0.365672 
 0.339286 0.347485 -0.365672 
 0.339286 0.348066 -0.358209 
 0.340561 0.348066 -0.373134 
 0.340561 0.348648 -0.373134 
 0.340561 0.349229 -0.365672 
 0.341837 0.349229 -0.384328 
 0.341837 0.349811 -0.380597 
 0.341837 0.350393 -0.376866 
 0.343112 0.350393 -0.399254 
 0.343112 0.350974 -0.388060 
 0.343112 0.351556 -0.380597 
 0.344388 0.352137 -0.391791 
 0.344388 0.352719 -0.388060 
 0.344388 0.353300 -0.388060 
 0.345663 0.353300 -0.406716 
 0.345663 0.353882 -0.406716 
 0.345663 0.354464 -0.402985 
 0.346939 0.354464 -0.421642 
 0.346939 0.355045 -0.414179 
 0.346939 0.355627 -0.399254 
 0.348214 0.355627 -0.414179 
 0.348214 0.356208 -0.399254 
 0.348214 0.356790 -0.384328 
 0.349490 0.356790 -0.399254 
 0.349490 0.357371 -0.391791 
 0.349490 0.357953 -0.380597 
 0.350765 0.357953 -0.395522 
 0.350765 0.358534 -0.376866 
 0.350765 0.359116 -0.347015 
 0.352041 0.359698 -0.324627 
 0.352041 0.360279 -0.298507 
 0.352041 0.360861 -0.268657 
 0.353316 0.360861 -0.268657 
 0.353316 0.361442 -0.246269 
 0.353316 0.362024 -0.216418 
 0.354592 0.362024 -0.227612 
 0.354592 0.362605 -0.216418 
 0.354592 0.363187 -0.201493 
 0.355867 0.363187 -0.212687 
 0.355867 0.363769 -0.208955 
 0.355867 0.364350 -0.197761 
 0.357143 0.364350 -0.212687 
 0.357143 0.364932 -0.205224 
 0.357143 0.365513 -0.194030 
 0.358418 0.365513 -0.205224 
 0.358418 0.366095 -0.194030 
 0.358418 0.366676 -0.167910 
 0.359694 0.367258 -0.156716 
 0.359694 0.367839 -0.138060 
 0.359694 0.368421 -0.123134 
 0.360969 0.368421 -0.123134 
 0.360969 0.369003 -0.104478 
 0.360969 0.369584 -0.078358 
 0.362245 0.369584 -0.070896 
 0.362245 0.370166 -0.052239 
 0.362245 0.370747 -0.011194 
 0.363520 0.370747 0.000000 
 0.363520 0.371329 0.022388 
 0.363520 0.371910 0.063433 
 0.364796 0.371910 0.059701 
 0.364796 0.372492 0.082090 
 0.364796 0.373074 0.100746 
 0.366071 0.373074 0.085821 
 0.366071 0.373655 0.097015 
 0.366071 0.374237 0.123134 
 0.367347 0.374237 0.093284 
 0.367347 0.374818 0.111940 
 0.367347 0.375400 0.138060 
 0.367347 0.375981 0.156716 
 0.368622 0.375981 0.152985 
 0.368622 0.376563 0.194030 
 0.368622 0.377145 0.216418 
 0.369898 0.377145 0.212687 
 0.369898 0.377726 0.235075 
 0.369898 0.378308 0.246269 
 0.371173 0.378308 0.223881 
 0.371173 0.378889 0.223881 
 0.371173 0.379471 0.216418 
 0.372449 0.379471 0.201493 
 0.372449 0.380052 0.194030 
 0.372449 0.380634 0.171642 
 0.373724 0.380634 0.145522 
 0.373724 0.381215 0.119403 
 0.373724 0.381797 0.085821 
 0.375000 0.382379 0.044776 
 0.375000 0.382960 0.041045 
 0.375000 0.383542 0.041045 
 0.376276 0.383542 0.007463 
 0.376276 0.384123 0.011194 
 0.376276 0.384705 0.022388 
 0.377551 0.384705 0.022388 
 0.377551 0.385286 0.078358 
 0.377551 0.385868 0.111940 
 0.378827 0.385868 0.115672 
 0.378827 0.386450 0.167910 
 0.378827 0.387031 0.205224 
 0.380102 0.387031 0.208955 
 0.380102 0.387613 0.238806 
 0.380102 0.388194 0.287313 
 0.381378 0.388194 0.291045 
 0.381378 0.388776 0.313433 
 0.381378 0.389357 0.350746 
 0.382653 0.389939 0.376866 
 0.382653 0.390521 0.402985 
 0.382653 0.391102 0.410448 
 0.383929 0.391102 0.380597 
 0.383929 0.391684 0.388060 
 0.383929 0.392265 0.395522 
 0.385204 0.392265 0.373134 
 0.385204 0.392847 0.410448 
 0.385204 0.393428 0.436567 
 0.386480 0.393428 0.429104 
 0.386480 0.394010 0.473881 
 0.386480 0.394591 0.488806 
 0.387755 0.394591 0.473881 
 0.387755 0.395173 0.492537 
 0.387755 0.395755 0.500000 
 0.389031 0.395755 0.485075 
 0.389031 0.396336 0.496269 
 0.389031 0.396918 0.488806 
 0.390306 0.396918 0.481343 
 0.390306 0.397499 0.455224 
 0.390306 0.398081 0.402985 
 0.390306 0.398662 0.373134 
 0.391582 0.398662 0.369403 
 0.391582 0.399244 0.320896 
 0.391582 0.399826 0.291045 
 0.392857 0.399826 0.283582 
 0.392857 0.400407 0.235075 
 0.392857 0.400989 0.205224 
 0.394133 0.400989 0.201493 
 0.394133 0.401570 0.164179 
 0.394133 0.402152 0.138060 
 0.395408 0.402152 0.138060 
 0.395408 0.402733 0.119403 
 0.395408 0.403315 0.111940 
 0.396684 0.403315 0.104478 
 0.396684 0.403896 0.089552 
 0.396684 0.404478 0.074627 
 0.397959 0.404478 0.063433 
 0.397959 0.405060 0.048507 
 0.397959 0.405641 0.041045 
 0.397959 0.406223 0.033582 
 0.399235 0.406223 0.026119 
 0.399235 0.406804 0.018657 
 0.399235 0.407386 0.011194 
 0.400510 0.407386 0.007463 
 0.400510 0.407967 -0.003731 
 0.400510 0.408549 -0.011194 
 0.401786 0.408549 -0.011194 
 0.401786 0.409131 -0.029851 
 0.401786 0.409712 -0.044776 
 0.403061 0.409712 -0.044776 
 0.403061 0.410294 -0.059701 
 0.403061 0.410875 -0.070896 
 0.404337 0.410875 -0.074627 
 0.404337 0.411457 -0.089552 
 0.404337 0.412038 -0.097015 
 0.405612 0.412038 -0.100746 
 0.405612 0.412620 -0.119403 
 0.405612 0.413202 -0.126866 
 0.405612 0.413783 -0.138060 
 0.406888 0.413783 -0.134328 
 0.406888 0.414365 -0.145522 
 0.406888 0.414946 -0.152985 
 0.408163 0.414946 -0.138060 
 0.408163 0.415528 -0.119403 
 0.408163 0.416109 -0.115672 
 0.409439 0.416109 -0.097015 
 0.409439 0.416691 -0.104478 
 0.409439 0.417272 -0.119403 
 0.410714 0.417272 -0.100746 
 0.410714 0.417854 -0.123134 
 0.410714 0.418436 -0.138060 
 0.411990 0.418436 -0.119403 
 0.411990 0.419017 -0.138060 
 0.411990 0.419599 -0.145522 
 0.413265 0.419599 -0.119403 
 0.413265 0.420180 -0.126866 
 0.413265 0.420762 -0.149254 
 0.413265 0.421343 -0.164179 
 0.414541 0.421343 -0.126866 
 0.414541 0.421925 -0.134328 
 0.414541 0.422507 -0.152985 
 0.415816 0.422507 -0.123134 
 0.415816 0.423088 -0.134328 
 0.415816 0.423670 -0.164179 
 0.417092 0.423670 -0.141791 
 0.417092 0.424251 -0.171642 
 0.417092 0.424833 -0.201493 
 0.418367 0.424833 -0.179104 
 0.418367 0.425414 -0.223881 
 0.418367 0.425996 -0.253731 
 0.419643 0.425996 -0.220149 
 0.419643 0.426577 -0.257463 
 0.419643 0.427159 -0.279851 
 0.420918 0.427159 -0.238806 
 0.420918 0.427741 -0.272388 
 0.420918 0.428322 -0.291045 
 0.420918 0.428904 -0.313433 
 0.422194 0.428904 -0.276119 
 0.422194 0.429485 -0.294776 
 0.422194 0.430067 -0.305970 
 0.423469 0.430067 -0.276119 
 0.423469 0.430648 -0.287313 
 0.423469 0.431230 -0.305970 
 0.424745 0.431230 -0.279851 
 0.424745 0.431812 -0.291045 
 0.424745 0.432393 -0.313433 
 0.426020 0.432393 -0.272388 
 0.426020 0.432975 -0.283582 
 0.426020 0.433556 -0.291045 
 0.427296 0.433556 -0.253731 
 0.427296 0.434138 -0.253731 
 0.427296 0.434719 -0.253731 
 0.428571 0.435301 -0.216418 
 0.428571 0.435883 -0.223881 
 0.428571 0.436464 -0.231343 
 0.429847 0.436464 -0.242537 
 0.429847 0.437046 -0.250000 
 0.429847 0.437627 -0.264925 
 0.431122 0.437627 -0.294776 
 0.431122 0.438209 -0.294776 
 0.431122 0.438790 -0.298507 
 0.432398 0.438790 -0.313433 
 0.432398 0.439372 -0.324627 
 0.432398 0.439953 -0.369403 
 0.433673 0.439953 -0.361940 
 0.433673 0.440535 -0.391791 
 0.433673 0.441117 -0.455224 
 0.434949 0.441117 -0.432836 
 0.434949 0.441698 -0.473881 
 0.434949 0.442280 -0.518657 
 0.434949 0.442861 -0.544776 
 0.436224 0.442861 -0.522388 
 0.436224 0.443443 -0.552239 
 0.436224 0.444024 -0.589552 
 0.437500 0.444024 -0.563433 
 0.437500 0.444606 -0.589552 
 0.437500 0.445188 -0.623134 
 0.438776 0.445188 -0.585821 
 0.438776 0.445769 -0.626866 
 0.438776 0.446351 -0.679104 
 0.440051 0.446351 -0.656716 
 0.440051 0.446932 -0.701493 
 0.440051 0.447514 -0.768657 
 0.441327 0.447514 -0.761194 
 0.441327 0.448095 -0.776119 
 0.441327 0.448677 -0.779851 
 0.442602 0.448677 -0.779851 
 0.442602 0.449259 -0.783582 
 0.442602 0.449840 -0.787313 
 0.442602 0.450422 -0.791045 
 0.443878 0.450422 -0.791045 
 0.443878 0.451003 -0.794776 
 0.443878 0.451585 -0.791045 
 0.445153 0.451585 -0.791045 
 0.445153 0.452166 -0.791045 
 0.445153 0.452748 -0.791045 
 0.446429 0.452748 -0.791045 
 0.446429 0.453329 -0.791045 
 0.446429 0.453911 -0.787313 
 0.447704 0.453911 -0.787313 
 0.447704 0.454493 -0.787313 
 0.447704 0.455074 -0.783582 
 0.448980 0.455074 -0.787313 
 0.448980 0.455656 -0.787313 
 0.448980 0.456237 -0.783582 
 0.450255 0.456819 -0.783582 
 0.450255 0.457400 -0.783582 
 0.450255 0.457982 -0.783582 
 0.451531 0.457982 -0.783582 
 0.451531 0.458564 -0.779851 
 0.451531 0.459145 -0.779851 
 0.452806 0.459145 -0.779851 
 0.452806 0.459727 -0.776119 
 0.452806 0.460308 -0.776119 
 0.454082 0.460308 -0.776119 
 0.454082 0.460890 -0.776119 
 0.454082 0.461471 -0.772388 
 0.455357 0.461471 -0.772388 
 0.455357 0.462053 -0.764925 
 0.455357 0.462634 -0.753731 
 0.456633 0.462634 -0.750000 
 0.456633 0.463216 -0.727612 
 0.456633 0.463798 -0.697761 
 0.456633 0.464379 -0.675373 
 0.457908 0.464379 -0.679104 
 0.457908 0.464961 -0.649254 
 0.457908 0.465542 -0.634328 
 0.459184 0.465542 -0.638060 
 0.459184 0.466124 -0.608209 
 0.459184 0.466705 -0.585821 
 0.460459 0.466705 -0.593284 
 0.460459 0.467287 -0.559701 
 0.460459 0.467869 -0.537313 
 0.461735 0.467869 -0.548507 
 0.461735 0.468450 -0.500000 
 0.461735 0.469032 -0.477612 
 0.463010 0.469032 -0.492537 
 0.463010 0.469613 -0.458955 
 0.463010 0.470195 -0.432836 
 0.464286 0.470195 -0.440299 
 0.464286 0.470776 -0.402985 
 0.464286 0.471358 -0.369403 
 0.464286 0.471940 -0.350746 
 0.465561 0.471940 -0.347015 
 0.465561 0.472521 -0.313433 
 0.465561 0.473103 -0.283582 
 0.466837 0.473103 -0.279851 
 0.466837 0.473684 -0.242537 
 0.466837 0.474266 -0.212687 
 0.468112 0.474266 -0.220149 
 0.468112 0.474847 -0.201493 
 0.468112 0.475429 -0.197761 
 0.469388 0.475429 -0.216418 
 0.469388 0.476010 -0.227612 
 0.469388 0.476592 -0.250000 
 0.470663 0.476592 -0.287313 
 0.470663 0.477174 -0.309701 
 0.470663 0.477755 -0.320896 
 0.470663 0.478337 -0.335821 
 0.471939 0.478337 -0.361940 
 0.471939 0.478918 -0.361940 
 0.471939 0.479500 -0.358209 
 0.473214 0.479500 -0.376866 
 0.473214 0.480081 -0.358209 
 0.473214 0.480663 -0.320896 
 0.474490 0.480663 -0.343284 
 0.474490 0.481245 -0.317164 
 0.474490 0.481826 -0.332090 
 0.475765 0.481826 -0.388060 
 0.475765 0.482408 -0.402985 
 0.475765 0.482989 -0.402985 
 0.477041 0.482989 -0.447761 
 0.477041 0.483571 -0.458955 
 0.477041 0.484152 -0.458955 
 0.478316 0.484734 -0.492537 
 0.478316 0.485315 -0.496269 
 0.478316 0.485897 -0.500000 
 0.479592 0.485897 -0.522388 
 0.479592 0.486479 -0.526119 
 0.479592 0.487060 -0.526119 
 0.480867 0.487060 -0.541045 
 0.480867 0.487642 -0.529851 
 0.480867 0.488223 -0.507463 
 0.482143 0.488223 -0.496269 
 0.482143 0.488805 -0.473881 
 0.482143 0.489386 -0.451493 
 0.483418 0.489386 -0.432836 
 0.483418 0.489968 -0.406716 
 0.483418 0.490550 -0.391791 
 0.484694 0.490550 -0.373134 
 0.484694 0.491131 -0.354478 
 0.484694 0.491713 -0.335821 
 0.484694 0.492294 -0.309701 
 0.485969 0.492294 -0.287313 
 0.485969 0.492876 -0.257463 
 0.485969 0.493457 -0.212687 
 0.487245 0.493457 -0.205224 
 0.487245 0.494039 -0.175373 
 0.487245 0.494621 -0.134328 
 0.488520 0.494621 -0.119403 
 0.488520 0.495202 -0.097015 
 0.488520 0.495784 -0.059701 
 0.489796 0.495784 -0.052239 
 0.489796 0.496365 -0.026119 
 0.489796 0.496947 0.011194 
 0.491071 0.496947 0.014925 
 0.491071 0.497528 0.037313 
 0.491071 0.498110 0.078358 
 0.491071 0.498691 0.097015 
 0.492347 0.498691 0.100746 
 0.492347 0.499273 0.123134 
 0.492347 0.499855 0.123134 
 0.493622 0.499855 0.123134 
 0.493622 0.500436 0.123134 
 0.493622 0.501018 0.123134 
 0.494898 0.501018 0.104478 
 0.494898 0.501599 0.097015 
 0.494898 0.502181 0.093284 
 0.496173 0.502181 0.067164 
 0.496173 0.502762 0.067164 
 0.496173 0.503344 0.059701 
 0.497449 0.503344 0.018657 
 0.497449 0.503926 0.014925 
 0.497449 0.504507 -0.003731 
 0.498724 0.504507 -0.037313 
 0.498724 0.505089 -0.055970 
 0.498724 0.505670 -0.074627 
 0.498724 0.506252 -0.085821 
 0.500000 0.506252 -0.115672 
 0.500000 0.506833 -0.130597 
 0.500000 0.507415 -0.141791 
 0.501276 0.507415 -0.179104 
 0.501276 0.507997 -0.190299 
 0.501276 0.508578 -0.212687 
 0.502551 0.508578 -0.250000 
 0.502551 0.509160 -0.264925 
 0.502551 0.509741 -0.298507 
 0.503827 0.509741 -0.324627 
 0.503827 0.510323 -0.343284 
 0.503827 0.510904 -0.369403 
 0.505102 0.510904 -0.399254 
 0.505102 0.511486 -0.417910 
 0.505102 0.512067 -0.440299 
 0.505102 0.512649 -0.455224 
 0.506378 0.512649 -0.462687 
 0.506378 0.513231 -0.455224 
 0.506378 0.513812 -0.432836 
 0.507653 0.513812 -0.421642 
 0.507653 0.514394 -0.384328 
 0.507653 0.514975 -0.365672 
 0.508929 0.514975 -0.354478 
 0.508929 0.515557 -0.324627 
 0.508929 0.516138 -0.302239 
 0.510204 0.516138 -0.287313 
 0.510204 0.516720 -0.264925 
 0.510204 0.517302 -0.227612 
 0.511480 0.517302 -0.205224 
 0.511480 0.517883 -0.182836 
 0.511480 0.518465 -0.149254 
 0.511480 0.519046 -0.126866 
 0.512755 0.519046 -0.108209 
 0.512755 0.519628 -0.078358 
 0.512755 0.520209 -0.055970 
 0.514031 0.520209 -0.037313 
 0.514031 0.520791 -0.011194 
 0.514031 0.521372 0.007463 
 0.515306 0.521372 0.018657 
 0.515306 0.521954 0.029851 
 0.515306 0.522536 0.037313 
 0.516582 0.522536 0.029851 
 0.516582 0.523117 0.048507 
 0.516582 0.523699 0.052239 
 0.517857 0.523699 0.044776 
 0.517857 0.524280 0.067164 
 0.517857 0.524862 0.070896 
 0.519133 0.524862 0.055970 
 0.519133 0.525443 0.067164 
 0.519133 0.526025 0.070896 
 0.519133 0.526607 0.078358 
 0.520408 0.526607 0.082090 
 0.520408 0.527188 0.104478 
 0.520408 0.527770 0.108209 
 0.521684 0.527770 0.123134 
 0.521684 0.528351 0.126866 
 0.521684 0.528933 0.123134 
 0.522959 0.528933 0.145522 
 0.522959 0.529514 0.149254 
 0.522959 0.530096 0.149254 
 0.524235 0.530096 0.175373 
 0.524235 0.530678 0.171642 
 0.524235 0.531259 0.167910 
 0.525510 0.531259 0.197761 
 0.525510 0.531841 0.194030 
 0.525510 0.532422 0.197761 
 0.525510 0.533004 0.208955 
 0.526786 0.533004 0.242537 
 0.526786 0.533585 0.250000 
 0.526786 0.534167 0.276119 
 0.528061 0.534167 0.347015 
 0.528061 0.534748 0.350746 
 0.528061 0.535330 0.358209 
 0.529337 0.535330 0.402985 
 0.529337 0.535912 0.410448 
 0.529337 0.536493 0.410448 
 0.530612 0.536493 0.447761 
 0.530612 0.537075 0.451493 
 0.530612 0.537656 0.466418 
 0.531888 0.537656 0.496269 
 0.531888 0.538238 0.507463 
 0.531888 0.538819 0.514925 
 0.531888 0.539401 0.548507 
 0.533163 0.539401 0.552239 
 0.533163 0.539983 0.567164 
 0.533163 0.540564 0.593284 
 0.534439 0.540564 0.597015 
 0.534439 0.541146 0.615672 
 0.534439 0.541727 0.652985 
 0.535714 0.541727 0.656716 
 0.535714 0.542309 0.682836 
 0.535714 0.542890 0.723881 
 0.536990 0.542890 0.731343 
 0.536990 0.543472 0.757463 
 0.536990 0.544054 0.794776 
 0.538265 0.544054 0.805970 
 0.538265 0.544635 0.828358 
 0.538265 0.545217 0.858209 
 0.539541 0.545217 0.869403 
 0.539541 0.545798 0.910448 
 0.539541 0.546380 0.925373 
 0.539541 0.546961 0.940299 
 0.540816 0.546961 0.947761 
 0.540816 0.547543 0.966418 
 0.540816 0.548124 0.981343 
 0.542092 0.548124 0.958955 
 0.542092 0.548706 0.955224 
 0.542092 0.549288 0.944030 
 0.543367 0.549288 0.925373 
 0.543367 0.549869 0.910448 
 0.543367 0.550451 0.869403 
 0.544643 0.550451 0.847015 
 0.544643 0.551032 0.817164 
 0.544643 0.551614 0.798507 
 0.545918 0.551614 0.772388 
 0.545918 0.552195 0.776119 
 0.545918 0.552777 0.779851 
 0.545918 0.553359 0.791045 
 0.547194 0.553359 0.772388 
 0.547194 0.553940 0.794776 
 0.547194 0.554522 0.820896 
 0.548469 0.554522 0.794776 
 0.548469 0.555103 0.813433 
 0.548469 0.555685 0.835821 
 0.549745 0.555685 0.832090 
 0.549745 0.556266 0.839552 
 0.549745 0.556848 0.832090 
 0.551020 0.556848 0.832090 
 0.551020 0.557429 0.832090 
 0.551020 0.558011 0.828358 
 0.552296 0.558011 0.839552 
 0.552296 0.558593 0.843284 
 0.552296 0.559174 0.843284 
 0.552296 0.559756 0.839552 
 0.553571 0.559756 0.861940 
 0.553571 0.560337 0.854478 
 0.553571 0.560919 0.854478 
 0.554847 0.560919 0.876866 
 0.554847 0.561500 0.880597 
 0.554847 0.562082 0.888060 
 0.556122 0.562082 0.910448 
 0.556122 0.562664 0.932836 
 0.556122 0.563245 0.951493 
 0.557398 0.563245 0.962687 
 0.557398 0.563827 0.977612 
 0.557398 0.564408 0.951493 
 0.558673 0.564408 0.932836 
 0.558673 0.564990 0.895522 
 0.558673 0.565571 0.805970 
 0.558673 0.566153 0.772388 
 0.559949 0.566153 0.783582 
 0.559949 0.566735 0.727612 
 0.559949 0.567316 0.701493 
 0.561224 0.567316 0.708955 
 0.561224 0.567898 0.671642 
 0.561224 0.568479 0.649254 
 0.562500 0.568479 0.660448 
 0.562500 0.569061 0.623134 
 0.562500 0.569642 0.593284 
 0.563776 0.569642 0.611940 
 0.563776 0.570224 0.570896 
 0.563776 0.570805 0.548507 
 0.565051 0.570805 0.570896 
 0.565051 0.571387 0.533582 
 0.565051 0.571969 0.503731 
 0.565051 0.572550 0.473881 
 0.566327 0.572550 0.485075 
 0.566327 0.573132 0.436567 
 0.566327 0.573713 0.410448 
 0.567602 0.573713 0.410448 
 0.567602 0.574295 0.369403 
 0.567602 0.574876 0.343284 
 0.568878 0.574876 0.335821 
 0.568878 0.575458 0.305970 
 0.568878 0.576040 0.283582 
 0.570153 0.576040 0.276119 
 0.570153 0.576621 0.250000 
 0.570153 0.577203 0.231343 
 0.571429 0.577203 0.223881 
 0.571429 0.577784 0.197761 
 0.571429 0.578366 0.179104 
 0.571429 0.578947 0.156716 
 0.572704 0.578947 0.160448 
 0.572704 0.579529 0.149254 
 0.572704 0.580110 0.141791 
 0.573980 0.580110 0.156716 
 0.573980 0.580692 0.152985 
 0.573980 0.581274 0.152985 
 0.575255 0.581274 0.179104 
 0.575255 0.581855 0.179104 
 0.575255 0.582437 0.175373 
 0.576531 0.582437 0.201493 
 0.576531 0.583018 0.197761 
 0.576531 0.583600 0.186567 
 0.577806 0.583600 0.182836 
 0.577806 0.584181 0.164179 
 0.577806 0.584763 0.141791 
 0.577806 0.585345 0.097015 
 0.579082 0.585345 0.063433 
 0.579082 0.585926 0.044776 
 0.579082 0.586508 0.007463 
 0.580357 0.586508 -0.007463 
 0.580357 0.587089 -0.026119 
 0.580357 0.587671 -0.037313 
 0.581633 0.587671 -0.018657 
 0.581633 0.588252 -0.022388 
 0.581633 0.588834 -0.022388 
 0.582908 0.588834 0.007463 
 0.582908 0.589416 0.000000 
 0.582908 0.589997 -0.011194 
 0.584184 0.589997 0.011194 
 0.584184 0.590579 -0.003731 
 0.584184 0.591160 -0.014925 
 0.584184 0.591742 -0.033582 
 0.585459 0.591742 -0.014925 
 0.585459 0.592323 -0.029851 
 0.585459 0.592905 -0.044776 
 0.586735 0.592905 -0.033582 
 0.586735 0.593486 -0.044776 
 0.586735 0.594068 -0.070896 
 0.588010 0.594068 -0.067164 
 0.588010 0.594650 -0.085821 
 0.588010 0.595231 -0.115672 
 0.589286 0.595231 -0.126866 
 0.589286 0.595813 -0.149254 
 0.589286 0.596394 -0.190299 
 0.590561 0.596394 -0.186567 
 0.590561 0.596976 -0.212687 
 0.590561 0.597557 -0.235075 
 0.590561 0.598139 -0.246269 
 0.591837 0.598139 -0.238806 
 0.591837 0.598721 -0.231343 
 0.591837 0.599302 -0.227612 
 0.593112 0.599302 -0.231343 
 0.593112 0.599884 -0.212687 
 0.593112 0.600465 -0.197761 
 0.594388 0.600465 -0.205224 
 0.594388 0.601047 -0.190299 
 0.594388 0.601628 -0.167910 
 0.595663 0.601628 -0.171642 
 0.595663 0.602210 -0.152985 
 0.595663 0.602792 -0.119403 
 0.596939 0.602792 -0.119403 
 0.596939 0.603373 -0.100746 
 0.596939 0.603955 -0.074627 
 0.596939 0.604536 -0.059701 
 0.598214 0.604536 -0.052239 
 0.598214 0.605118 -0.029851 
 0.598214 0.605699 -0.011194 
 0.599490 0.605699 -0.003731 
 0.599490 0.606281 0.022388 
 0.599490 0.606862 0.037313 
 0.600765 0.606862 0.044776 
 0.600765 0.607444 0.067164 
 0.600765 0.608026 0.082090 
 0.602041 0.608026 0.089552 
 0.602041 0.608607 0.111940 
 0.602041 0.609189 0.123134 
 0.603316 0.609189 0.134328 
 0.603316 0.609770 0.149254 
 0.603316 0.610352 0.171642 
 0.603316 0.610933 0.182836 
 0.604592 0.610933 0.190299 
 0.604592 0.611515 0.212687 
 0.604592 0.612097 0.223881 
 0.605867 0.612097 0.235075 
 0.605867 0.612678 0.257463 
 0.605867 0.613260 0.272388 
 0.607143 0.613260 0.279851 
 0.607143 0.613841 0.302239 
 0.607143 0.614423 0.317164 
 0.608418 0.614423 0.324627 
 0.608418 0.615004 0.350746 
 0.608418 0.615586 0.369403 
 0.609694 0.615586 0.376866 
 0.609694 0.616167 0.402985 
 0.609694 0.616749 0.414179 
 0.609694 0.617331 0.432836 
 0.610969 0.617331 0.447761 
 0.610969 0.617912 0.455224 
 0.610969 0.618494 0.455224 
 0.612245 0.618494 0.477612 
 0.612245 0.619075 0.477612 
 0.612245 0.619657 0.481343 
 0.613520 0.619657 0.507463 
 0.613520 0.620238 0.511194 
 0.613520 0.620820 0.511194 
 0.614796 0.620820 0.533582 
 0.614796 0.621402 0.537313 
 0.614796 0.621983 0.555970 
 0.616071 0.621983 0.574627 
 0.616071 0.622565 0.604478 
 0.616071 0.623146 0.619403 
 0.616071 0.623728 0.623134 
 0.617347 0.623728 0.634328 
 0.617347 0.624309 0.626866 
 0.617347 0.624891 0.597015 
 0.618622 0.624891 0.604478 
 0.618622 0.625473 0.578358 
 0.618622 0.626054 0.541045 
 0.619898 0.626054 0.526119 
 0.619898 0.626636 0.496269 
 0.619898 0.627217 0.440299 
 0.621173 0.627217 0.425373 
 0.621173 0.627799 0.395522 
 0.621173 0.628380 0.365672 
 0.622449 0.628380 0.369403 
 0.622449 0.628962 0.335821 
 0.622449 0.629543 0.317164 
 0.622449 0.630125 0.287313 
 0.623724 0.630125 0.313433 
 0.623724 0.630707 0.291045 
 0.623724 0.631288 0.253731 
 0.625000 0.631288 0.276119 
 0.625000 0.631870 0.242537 
 0.625000 0.632451 0.201493 
 0.626276 0.632451 0.216418 
 0.626276 0.633033 0.186567 
 0.626276 0.633614 0.134328 
 0.627551 0.633614 0.145522 
 0.627551 0.634196 0.115672 
 0.627551 0.634778 0.085821 
 0.628827 0.634778 0.108209 
 0.628827 0.635359 0.097015 
 0.628827 0.635941 0.078358 
 0.630102 0.635941 0.104478 
 0.630102 0.636522 0.097015 
 0.630102 0.637104 0.089552 
 0.630102 0.637685 0.082090 
 0.631378 0.637685 0.111940 
 0.631378 0.638267 0.104478 
 0.631378 0.638849 0.093284 
 0.632653 0.638849 0.119403 
 0.632653 0.639430 0.108209 
 0.632653 0.640012 0.093284 
 0.633929 0.640012 0.097015 
 0.633929 0.640593 0.078358 
 0.633929 0.641175 0.052239 
 0.635204 0.641175 0.048507 
 0.635204 0.641756 0.029851 
 0.635204 0.642338 0.000000 
 0.636480 0.642338 -0.007463 
 0.636480 0.642919 -0.026119 
 0.636480 0.643501 -0.063433 
 0.636480 0.644083 -0.089552 
 0.637755 0.644083 -0.097015 
 0.637755 0.644664 -0.130597 
 0.637755 0.645246 -0.138060 
 0.639031 0.645246 -0.126866 
 0.639031 0.645827 -0.111940 
 0.639031 0.646409 -0.100746 
 0.640306 0.646409 -0.074627 
 0.640306 0.646990 -0.063433 
 0.640306 0.647572 -0.048507 
 0.641582 0.647572 -0.026119 
 0.641582 0.648154 -0.037313 
 0.641582 0.648735 -0.067164 
 0.642857 0.648735 -0.067164 
 0.642857 0.649317 -0.093284 
 0.642857 0.649898 -0.134328 
 0.642857 0.650480 -0.167910 
 0.644133 0.650480 -0.175373 
 0.644133 0.651061 -0.223881 
 0.644133 0.651643 -0.257463 
 0.645408 0.651643 -0.268657 
 0.645408 0.652224 -0.305970 
 0.645408 0.652806 -0.305970 
 0.646684 0.652806 -0.302239 
 0.646684 0.653388 -0.298507 
 0.646684 0.653969 -0.291045 
 0.647959 0.653969 -0.283582 
 0.647959 0.654551 -0.272388 
 0.647959 0.655132 -0.257463 
 0.649235 0.655132 -0.242537 
 0.649235 0.655714 -0.212687 
 0.649235 0.656295 -0.194030 
 0.649235 0.656877 -0.175373 
 0.650510 0.656877 -0.160448 
 0.650510 0.657459 -0.126866 
 0.650510 0.658040 -0.104478 
 0.651786 0.658040 -0.097015 
 0.651786 0.658622 -0.063433 
 0.651786 0.659203 -0.041045 
 0.653061 0.659203 -0.041045 
 0.653061 0.659785 -0.011194 
 0.653061 0.660366 0.007463 
 0.654337 0.660366 -0.003731 
 0.654337 0.660948 0.018657 
 0.654337 0.661530 0.037313 
 0.655612 0.661530 0.018657 
 0.655612 0.662111 0.044776 
 0.655612 0.662693 0.063433 
 0.656888 0.663274 0.070896 
 0.656888 0.663856 0.085821 
 0.656888 0.664437 0.111940 
 0.658163 0.664437 0.093284 
 0.658163 0.665019 0.108209 
 0.658163 0.665600 0.123134 
 0.659439 0.665600 0.104478 
 0.659439 0.666182 0.126866 
 0.659439 0.666764 0.141791 
 0.660714 0.666764 0.126866 
 0.660714 0.667345 0.156716 
 0.660714 0.667927 0.182836 
 0.661990 0.667927 0.179104 
 0.661990 0.668508 0.220149 
 0.661990 0.669090 0.246269 
 0.663265 0.669090 0.242537 
 0.663265 0.669671 0.287313 
 0.663265 0.670253 0.317164 
 0.663265 0.670835 0.354478 
 0.664541 0.670835 0.361940 
 0.664541 0.671416 0.384328 
 0.664541 0.671998 0.402985 
 0.665816 0.671998 0.414179 
 0.665816 0.672579 0.414179 
 0.665816 0.673161 0.391791 
 0.667092 0.673161 0.410448 
 0.667092 0.673742 0.388060 
 0.667092 0.674324 0.350746 
 0.668367 0.674324 0.369403 
 0.668367 0.674905 0.343284 
 0.668367 0.675487 0.324627 
 0.669643 0.675487 0.339552 
 0.669643 0.676069 0.305970 
 0.669643 0.676650 0.287313 
 0.669643 0.677232 0.253731 
 0.670918 0.677232 0.257463 
 0.670918 0.677813 0.227612 
 0.670918 0.678395 0.182836 
 0.672194 0.678395 0.182836 
 0.672194 0.678976 0.149254 
 0.672194 0.679558 0.097015 
 0.673469 0.679558 0.104478 
 0.673469 0.680140 0.063433 
 0.673469 0.680721 0.014925 
 0.674745 0.680721 0.014925 
 0.674745 0.681303 0.014925 
 0.674745 0.681884 0.029851 
 0.676020 0.681884 0.063433 
 0.676020 0.682466 0.074627 
 0.676020 0.683047 0.089552 
 0.677296 0.683629 0.123134 
 0.677296 0.684211 0.123134 
 0.677296 0.684792 0.115672 
 0.678571 0.684792 0.141791 
 0.678571 0.685374 0.134328 
 0.678571 0.685955 0.111940 
 0.679847 0.685955 0.134328 
 0.679847 0.686537 0.115672 
 0.679847 0.687118 0.093284 
 0.681122 0.687118 0.104478 
 0.681122 0.687700 0.085821 
 0.681122 0.688281 0.055970 
 0.682398 0.688281 0.059701 
 0.682398 0.688863 0.037313 
 0.682398 0.689445 0.003731 
 0.683673 0.689445 0.011194 
 0.683673 0.690026 -0.007463 
 0.683673 0.690608 -0.003731 
 0.683673 0.691189 0.007463 
 0.684949 0.691189 0.022388 
 0.684949 0.691771 0.055970 
 0.684949 0.692352 0.078358 
 0.686224 0.692352 0.097015 
 0.686224 0.692934 0.134328 
 0.686224 0.693516 0.156716 
 0.687500 0.693516 0.171642 
 0.687500 0.694097 0.194030 
 0.687500 0.694679 0.205224 
 0.688776 0.694679 0.223881 
 0.688776 0.695260 0.223881 
 0.688776 0.695842 0.223881 
 0.690051 0.695842 0.246269 
 0.690051 0.696423 0.250000 
 0.690051 0.697005 0.257463 
 0.690051 0.697587 0.268657 
 0.691327 0.697587 0.283582 
 0.691327 0.698168 0.302239 
 0.691327 0.698750 0.332090 
 0.692602 0.698750 0.332090 
 0.692602 0.699331 0.369403 
 0.692602 0.699913 0.399254 
 0.693878 0.699913 0.391791 
 0.693878 0.700494 0.429104 
 0.693878 0.701076 0.462687 
 0.695153 0.701076 0.462687 
 0.695153 0.701657 0.518657 
 0.695153 0.702239 0.552239 
 0.696429 0.702239 0.559701 
 0.696429 0.702821 0.589552 
 0.696429 0.703402 0.638060 
 0.697704 0.703402 0.641791 
 0.697704 0.703984 0.667910 
 0.697704 0.704565 0.701493 
 0.697704 0.705147 0.723881 
 0.698980 0.705147 0.731343 
 0.698980 0.705728 0.757463 
 0.698980 0.706310 0.750000 
 0.700255 0.706310 0.753731 
 0.700255 0.706892 0.738806 
 0.700255 0.707473 0.738806 
 0.701531 0.707473 0.723881 
 0.701531 0.708055 0.708955 
 0.701531 0.708636 0.694030 
 0.702806 0.708636 0.671642 
 0.702806 0.709218 0.641791 
 0.702806 0.709799 0.623134 
 0.704082 0.709799 0.600746 
 0.704082 0.710381 0.563433 
 0.704082 0.710962 0.541045 
 0.705357 0.710962 0.511194 
 0.705357 0.711544 0.466418 
 0.705357 0.712126 0.440299 
 0.705357 0.712707 0.432836 
 0.706633 0.712707 0.425373 
 0.706633 0.713289 0.414179 
 0.706633 0.713870 0.399254 
 0.707908 0.713870 0.373134 
 0.707908 0.714452 0.354478 
 0.707908 0.715033 0.354478 
 0.709184 0.715033 0.335821 
 0.709184 0.715615 0.339552 
 0.709184 0.716197 0.339552 
 0.710459 0.716197 0.309701 
 0.710459 0.716778 0.302239 
 0.710459 0.717360 0.302239 
 0.711735 0.717360 0.264925 
 0.711735 0.717941 0.287313 
 0.711735 0.718523 0.302239 
 0.713010 0.718523 0.272388 
 0.713010 0.719104 0.294776 
 0.713010 0.719686 0.298507 
 0.713010 0.720268 0.291045 
 0.714286 0.720268 0.272388 
 0.714286 0.720849 0.261194 
 0.714286 0.721431 0.250000 
 0.715561 0.721431 0.227612 
 0.715561 0.722012 0.212687 
 0.715561 0.722594 0.201493 
 0.716837 0.722594 0.182836 
 0.716837 0.723175 0.167910 
 0.716837 0.723757 0.156716 
 0.718112 0.723757 0.134328 
 0.718112 0.724338 0.119403 
 0.718112 0.724920 0.104478 
 0.719388 0.724920 0.085821 
 0.719388 0.725502 0.070896 
 0.719388 0.726083 0.055970 
 0.720663 0.726083 0.033582 
 0.720663 0.726665 0.011194 
 0.720663 0.727246 -0.003731 
 0.720663 0.727828 -0.026119 
 0.721939 0.727828 -0.048507 
 0.721939 0.728409 -0.067164 
 0.721939 0.728991 -0.089552 
 0.723214 0.728991 -0.119403 
 0.723214 0.729573 -0.126866 
 0.723214 0.730154 -0.134328 
 0.724490 0.730154 -0.138060 
 0.724490 0.730736 -0.145522 
 0.724490 0.731317 -0.152985 
 0.725765 0.731317 -0.141791 
 0.725765 0.731899 -0.141791 
 0.725765 0.732480 -0.141791 
 0.727041 0.732480 -0.123134 
 0.727041 0.733062 -0.119403 
 0.727041 0.733644 -0.115672 
 0.728316 0.733644 -0.085821 
 0.728316 0.734225 -0.082090 
 0.728316 0.734807 -0.082090 
 0.728316 0.735388 -0.085821 
 0.729592 0.735388 -0.055970 
 0.729592 0.735970 -0.059701 
 0.729592 0.736551 -0.067164 
 0.730867 0.736551 -0.037313 
 0.730867 0.737133 -0.052239 
 0.730867 0.737714 -0.078358 
 0.732143 0.737714 -0.059701 
 0.732143 0.738296 -0.089552 
 0.732143 0.738878 -0.130597 
 0.733418 0.738878 -0.126866 
 0.733418 0.739459 -0.149254 
 0.733418 0.740041 -0.167910 
 0.734694 0.740041 -0.156716 
 0.734694 0.740622 -0.164179 
 0.734694 0.741204 -0.149254 
 0.735969 0.741785 -0.100746 
 0.735969 0.742367 -0.089552 
 0.735969 0.742949 -0.089552 
 0.737245 0.742949 -0.063433 
 0.737245 0.743530 -0.070896 
 0.737245 0.744112 -0.093284 
 0.738520 0.744112 -0.067164 
 0.738520 0.744693 -0.085821 
 0.738520 0.745275 -0.115672 
 0.739796 0.745275 -0.093284 
 0.739796 0.745856 -0.115672 
 0.739796 0.746438 -0.160448 
 0.741071 0.746438 -0.138060 
 0.741071 0.747019 -0.164179 
 0.741071 0.747601 -0.197761 
 0.742347 0.747601 -0.182836 
 0.742347 0.748183 -0.197761 
 0.742347 0.748764 -0.208955 
 0.742347 0.749346 -0.220149 
 0.743622 0.749346 -0.197761 
 0.743622 0.749927 -0.212687 
 0.743622 0.750509 -0.231343 
 0.744898 0.750509 -0.212687 
 0.744898 0.751090 -0.223881 
 0.744898 0.751672 -0.246269 
 0.746173 0.751672 -0.227612 
 0.746173 0.752254 -0.238806 
 0.746173 0.752835 -0.257463 
 0.747449 0.752835 -0.238806 
 0.747449 0.753417 -0.250000 
 0.747449 0.753998 -0.264925 
 0.748724 0.753998 -0.250000 
 0.748724 0.754580 -0.261194 
 0.748724 0.755161 -0.268657 
 0.750000 0.755161 -0.253731 
 0.750000 0.755743 -0.257463 
 0.750000 0.756325 -0.264925 
 0.750000 0.756906 -0.276119 
 0.751276 0.756906 -0.257463 
 0.751276 0.757488 -0.276119 
 0.751276 0.758069 -0.291045 
 0.752551 0.758069 -0.272388 
 0.752551 0.758651 -0.287313 
 0.752551 0.759232 -0.313433 
 0.753827 0.759232 -0.287313 
 0.753827 0.759814 -0.305970 
 0.753827 0.760395 -0.328358 
 0.755102 0.760395 -0.309701 
 0.755102 0.760977 -0.328358 
 0.755102 0.761559 -0.350746 
 0.756378 0.761559 -0.335821 
 0.756378 0.762140 -0.350746 
 0.756378 0.762722 -0.361940 
 0.756378 0.763303 -0.361940 
 0.757653 0.763303 -0.361940 
 0.757653 0.763885 -0.361940 
 0.757653 0.764466 -0.361940 
 0.758929 0.764466 -0.361940 
 0.758929 0.765048 -0.361940 
 0.758929 0.765630 -0.350746 
 0.760204 0.765630 -0.358209 
 0.760204 0.766211 -0.339552 
 0.760204 0.766793 -0.324627 
 0.761480 0.766793 -0.332090 
 0.761480 0.767374 -0.313433 
 0.761480 0.767956 -0.302239 
 0.762755 0.767956 -0.313433 
 0.762755 0.768537 -0.298507 
 0.762755 0.769119 -0.279851 
 0.764031 0.769119 -0.291045 
 0.764031 0.769700 -0.279851 
 0.764031 0.770282 -0.257463 
 0.764031 0.770864 -0.246269 
 0.765306 0.770864 -0.261194 
 0.765306 0.771445 -0.246269 
 0.765306 0.772027 -0.238806 
 0.766582 0.772027 -0.257463 
 0.766582 0.772608 -0.246269 
 0.766582 0.773190 -0.231343 
 0.767857 0.773190 -0.250000 
 0.767857 0.773771 -0.227612 
 0.767857 0.774353 -0.212687 
 0.769133 0.774353 -0.231343 
 0.769133 0.774935 -0.205224 
 0.769133 0.775516 -0.179104 
 0.770408 0.775516 -0.197761 
 0.770408 0.776098 -0.160448 
 0.770408 0.776679 -0.141791 
 0.770408 0.777261 -0.119403 
 0.771684 0.777261 -0.138060 
 0.771684 0.777842 -0.104478 
 0.771684 0.778424 -0.078358 
 0.772959 0.778424 -0.100746 
 0.772959 0.779006 -0.067164 
 0.772959 0.779587 -0.048507 
 0.774235 0.779587 -0.070896 
 0.774235 0.780169 -0.055970 
 0.774235 0.780750 -0.044776 
 0.775510 0.780750 -0.070896 
 0.775510 0.781332 -0.052239 
 0.775510 0.781913 -0.033582 
 0.776786 0.781913 -0.055970 
 0.776786 0.782495 -0.022388 
 0.776786 0.783076 -0.003731 
 0.776786 0.783658 0.026119 
 0.778061 0.783658 0.007463 
 0.778061 0.784240 0.029851 
 0.778061 0.784821 0.052239 
 0.779337 0.784821 0.022388 
 0.779337 0.785403 0.022388 
 0.779337 0.785984 0.000000 
 0.780612 0.785984 -0.029851 
 0.780612 0.786566 -0.048507 
 0.780612 0.787147 -0.074627 
 0.781888 0.787147 -0.104478 
 0.781888 0.787729 -0.145522 
 0.781888 0.788311 -0.164179 
 0.783163 0.788311 -0.194030 
 0.783163 0.788892 -0.205224 
 0.783163 0.789474 -0.216418 
 0.784439 0.790055 -0.261194 
 0.784439 0.790637 -0.268657 
 0.784439 0.791218 -0.283582 
 0.785714 0.791218 -0.309701 
 0.785714 0.791800 -0.320896 
 0.785714 0.792382 -0.343284 
 0.786990 0.792382 -0.376866 
 0.786990 0.792963 -0.391791 
 0.786990 0.793545 -0.410448 
 0.788265 0.793545 -0.444030 
 0.788265 0.794126 -0.458955 
 0.788265 0.794708 -0.481343 
 0.789541 0.794708 -0.518657 
 0.789541 0.795289 -0.533582 
 0.789541 0.795871 -0.537313 
 0.790816 0.795871 -0.548507 
 0.790816 0.796452 -0.548507 
 0.790816 0.797034 -0.548507 
 0.790816 0.797616 -0.548507 
 0.792092 0.797616 -0.548507 
 0.792092 0.798197 -0.548507 
 0.792092 0.798779 -0.544776 
 0.793367 0.798779 -0.526119 
 0.793367 0.799360 -0.522388 
 0.793367 0.799942 -0.514925 
 0.794643 0.799942 -0.481343 
 0.794643 0.800523 -0.477612 
 0.794643 0.801105 -0.477612 
 0.795918 0.801105 -0.458955 
 0.795918 0.801687 -0.458955 
 0.795918 0.802268 -0.466418 
 0.797194 0.802268 -0.444030 
 0.797194 0.802850 -0.447761 
 0.797194 0.803431 -0.451493 
 0.797194 0.804013 -0.455224 
 0.798469 0.804013 -0.432836 
 0.798469 0.804594 -0.436567 
 0.798469 0.805176 -0.444030 
 0.799745 0.805176 -0.421642 
 0.799745 0.805757 -0.432836 
 0.799745 0.806339 -0.451493 
 0.801020 0.806339 -0.440299 
 0.801020 0.806921 -0.466418 
 0.801020 0.807502 -0.511194 
 0.802296 0.807502 -0.511194 
 0.802296 0.808084 -0.544776 
 0.802296 0.808665 -0.585821 
 0.803571 0.808665 -0.585821 
 0.803571 0.809247 -0.585821 
 0.803571 0.809828 -0.585821 
 0.804847 0.810410 -0.574627 
 0.804847 0.810992 -0.541045 
 0.804847 0.811573 -0.518657 
 0.806122 0.811573 -0.518657 
 0.806122 0.812155 -0.485075 
 0.806122 0.812736 -0.458955 
 0.807398 0.812736 -0.466418 
 0.807398 0.813318 -0.436567 
 0.807398 0.813899 -0.417910 
 0.808673 0.813899 -0.429104 
 0.808673 0.814481 -0.402985 
 0.808673 0.815063 -0.384328 
 0.809949 0.815063 -0.402985 
 0.809949 0.815644 -0.384328 
 0.809949 0.816226 -0.361940 
 0.811224 0.816226 -0.384328 
 0.811224 0.816807 -0.373134 
 0.811224 0.817389 -0.358209 
 0.811224 0.817970 -0.343284 
 0.812500 0.817970 -0.376866 
 0.812500 0.818552 -0.350746 
 0.812500 0.819133 -0.332090 
 0.813776 0.819133 -0.358209 
 0.813776 0.819715 -0.332090 
 0.813776 0.820297 -0.313433 
 0.815051 0.820297 -0.339552 
 0.815051 0.820878 -0.324627 
 0.815051 0.821460 -0.317164 
 0.816327 0.821460 -0.347015 
 0.816327 0.822041 -0.343284 
 0.816327 0.822623 -0.350746 
 0.817602 0.822623 -0.373134 
 0.817602 0.823204 -0.395522 
 0.817602 0.823786 -0.414179 
 0.817602 0.824368 -0.429104 
 0.818878 0.824368 -0.447761 
 0.818878 0.824949 -0.447761 
 0.818878 0.825531 -0.436567 
 0.820153 0.825531 -0.458955 
 0.820153 0.826112 -0.451493 
 0.820153 0.826694 -0.447761 
 0.821429 0.826694 -0.473881 
 0.821429 0.827275 -0.477612 
 0.821429 0.827857 -0.477612 
 0.822704 0.827857 -0.507463 
 0.822704 0.828438 -0.511194 
 0.822704 0.829020 -0.518657 
 0.823980 0.829020 -0.544776 
 0.823980 0.829602 -0.559701 
 0.823980 0.830183 -0.570896 
 0.825255 0.830183 -0.589552 
 0.825255 0.830765 -0.589552 
 0.825255 0.831346 -0.559701 
 0.825255 0.831928 -0.507463 
 0.826531 0.831928 -0.522388 
 0.826531 0.832509 -0.488806 
 0.826531 0.833091 -0.462687 
 0.827806 0.833091 -0.481343 
 0.827806 0.833673 -0.470149 
 0.827806 0.834254 -0.462687 
 0.829082 0.834254 -0.481343 
 0.829082 0.834836 -0.492537 
 0.829082 0.835417 -0.507463 
 0.830357 0.835417 -0.526119 
 0.830357 0.835999 -0.552239 
 0.830357 0.836580 -0.570896 
 0.831633 0.836580 -0.589552 
 0.831633 0.837162 -0.600746 
 0.831633 0.837744 -0.611940 
 0.831633 0.838325 -0.630597 
 0.832908 0.838325 -0.652985 
 0.832908 0.838907 -0.660448 
 0.832908 0.839488 -0.660448 
 0.834184 0.839488 -0.660448 
 0.834184 0.840070 -0.652985 
 0.834184 0.840651 -0.645522 
 0.835459 0.840651 -0.626866 
 0.835459 0.841233 -0.626866 
 0.835459 0.841814 -0.626866 
 0.836735 0.841814 -0.604478 
 0.836735 0.842396 -0.604478 
 0.836735 0.842978 -0.611940 
 0.838010 0.842978 -0.589552 
 0.838010 0.843559 -0.608209 
 0.838010 0.844141 -0.623134 
 0.839286 0.844141 -0.604478 
 0.839286 0.844722 -0.623134 
 0.839286 0.845304 -0.638060 
 0.839286 0.845885 -0.656716 
 0.840561 0.845885 -0.638060 
 0.840561 0.846467 -0.649254 
 0.840561 0.847049 -0.660448 
 0.841837 0.847049 -0.641791 
 0.841837 0.847630 -0.645522 
 0.841837 0.848212 -0.652985 
 0.843112 0.848212 -0.630597 
 0.843112 0.848793 -0.630597 
 0.843112 0.849375 -0.619403 
 0.844388 0.849375 -0.597015 
 0.844388 0.849956 -0.585821 
 0.844388 0.850538 -0.563433 
 0.845663 0.850538 -0.541045 
 0.845663 0.851120 -0.526119 
 0.845663 0.851701 -0.503731 
 0.845663 0.852283 -0.473881 
 0.846939 0.852283 -0.447761 
 0.846939 0.852864 -0.410448 
 0.846939 0.853446 -0.361940 
 0.848214 0.853446 -0.350746 
 0.848214 0.854027 -0.343284 
 0.848214 0.854609 -0.358209 
 0.849490 0.854609 -0.347015 
 0.849490 0.855190 -0.369403 
 0.849490 0.855772 -0.402985 
 0.850765 0.855772 -0.395522 
 0.850765 0.856354 -0.417910 
 0.850765 0.856935 -0.451493 
 0.852041 0.856935 -0.440299 
 0.852041 0.857517 -0.455224 
 0.852041 0.858098 -0.451493 
 0.852041 0.858680 -0.432836 
 0.853316 0.858680 -0.410448 
 0.853316 0.859261 -0.391791 
 0.853316 0.859843 -0.388060 
 0.854592 0.859843 -0.361940 
 0.854592 0.860425 -0.354478 
 0.854592 0.861006 -0.358209 
 0.855867 0.861006 -0.324627 
 0.855867 0.861588 -0.328358 
 0.855867 0.862169 -0.339552 
 0.857143 0.862169 -0.309701 
 0.857143 0.862751 -0.317164 
 0.857143 0.863332 -0.305970 
 0.858418 0.863332 -0.287313 
 0.858418 0.863914 -0.264925 
 0.858418 0.864495 -0.231343 
 0.859694 0.864495 -0.212687 
 0.859694 0.865077 -0.186567 
 0.859694 0.865659 -0.145522 
 0.859694 0.866240 -0.123134 
 0.860969 0.866240 -0.104478 
 0.860969 0.866822 -0.070896 
 0.860969 0.867403 -0.044776 
 0.862245 0.867403 -0.029851 
 0.862245 0.867985 0.018657 
 0.862245 0.868566 0.033582 
 0.863520 0.868566 0.055970 
 0.863520 0.869148 0.048507 
 0.863520 0.869730 0.033582 
 0.864796 0.869730 0.067164 
 0.864796 0.870311 0.044776 
 0.864796 0.870893 0.029851 
 0.866071 0.870893 0.059701 
 0.866071 0.871474 0.048507 
 0.866071 0.872056 0.041045 
 0.867347 0.872056 0.078358 
 0.867347 0.872637 0.078358 
 0.867347 0.873219 0.078358 
 0.867347 0.873801 0.074627 
 0.868622 0.873801 0.111940 
 0.868622 0.874382 0.108209 
 0.868622 0.874964 0.111940 
 0.869898 0.874964 0.156716 
 0.869898 0.875545 0.175373 
 0.869898 0.876127 0.194030 
 0.871173 0.876127 0.238806 
 0.871173 0.876708 0.250000 
 0.871173 0.877290 0.231343 
 0.872449 0.877290 0.223881 
 0.872449 0.877871 0.175373 
 0.872449 0.878453 0.138060 
 0.873724 0.878453 0.123134 
 0.873724 0.879035 0.067164 
 0.873724 0.879616 0.033582 
 0.875000 0.880198 -0.007463 
 0.875000 0.880779 -0.048507 
 0.875000 0.881361 -0.074627 
 0.876276 0.881361 -0.085821 
 0.876276 0.881942 -0.123134 
 0.876276 0.882524 -0.149254 
 0.877551 0.882524 -0.160448 
 0.877551 0.883106 -0.201493 
 0.877551 0.883687 -0.227612 
 0.878827 0.883687 -0.227612 
 0.878827 0.884269 -0.268657 
 0.878827 0.884850 -0.291045 
 0.880102 0.884850 -0.276119 
 0.880102 0.885432 -0.302239 
 0.880102 0.886013 -0.309701 
 0.881378 0.886013 -0.276119 
 0.881378 0.886595 -0.279851 
 0.881378 0.887177 -0.283582 
 0.882653 0.887758 -0.250000 
 0.882653 0.888340 -0.257463 
 0.882653 0.888921 -0.264925 
 0.883929 0.888921 -0.231343 
 0.883929 0.889503 -0.238806 
 0.883929 0.890084 -0.242537 
 0.885204 0.890084 -0.212687 
 0.885204 0.890666 -0.208955 
 0.885204 0.891247 -0.201493 
 0.886480 0.891247 -0.179104 
 0.886480 0.891829 -0.156716 
 0.886480 0.892411 -0.130597 
 0.887755 0.892411 -0.126866 
 0.887755 0.892992 -0.119403 
 0.887755 0.893574 -0.126866 
 0.889031 0.893574 -0.149254 
 0.889031 0.894155 -0.171642 
 0.889031 0.894737 -0.190299 
 0.890306 0.894737 -0.216418 
 0.890306 0.895318 -0.235075 
 0.890306 0.895900 -0.246269 
 0.890306 0.896482 -0.279851 
 0.891582 0.896482 -0.291045 
 0.891582 0.897063 -0.320896 
 0.891582 0.897645 -0.373134 
 0.892857 0.897645 -0.388060 
 0.892857 0.898226 -0.417910 
 0.892857 0.898808 -0.447761 
 0.894133 0.898808 -0.473881 
 0.894133 0.899389 -0.500000 
 0.894133 0.899971 -0.522388 
 0.895408 0.899971 -0.526119 
 0.895408 0.900552 -0.559701 
 0.895408 0.901134 -0.578358 
 0.896684 0.901134 -0.578358 
 0.896684 0.901716 -0.608209 
 0.896684 0.902297 -0.623134 
 0.897959 0.902297 -0.626866 
 0.897959 0.902879 -0.641791 
 0.897959 0.903460 -0.656716 
 0.897959 0.904042 -0.675373 
 0.899235 0.904042 -0.675373 
 0.899235 0.904623 -0.682836 
 0.899235 0.905205 -0.694030 
 0.900510 0.905205 -0.694030 
 0.900510 0.905787 -0.697761 
 0.900510 0.906368 -0.705224 
 0.901786 0.906368 -0.701493 
 0.901786 0.906950 -0.705224 
 0.901786 0.907531 -0.712687 
 0.903061 0.907531 -0.712687 
 0.903061 0.908113 -0.716418 
 0.903061 0.908694 -0.720149 
 0.904337 0.908694 -0.716418 
 0.904337 0.909276 -0.723881 
 0.904337 0.909858 -0.723881 
 0.905612 0.909858 -0.723881 
 0.905612 0.910439 -0.727612 
 0.905612 0.911021 -0.727612 
 0.905612 0.911602 -0.723881 
 0.906888 0.911602 -0.723881 
 0.906888 0.912184 -0.723881 
 0.906888 0.912765 -0.720149 
 0.908163 0.912765 -0.720149 
 0.908163 0.913347 -0.720149 
 0.908163 0.913928 -0.720149 
 0.909439 0.913928 -0.720149 
 0.909439 0.914510 -0.701493 
 0.909439 0.915092 -0.664179 
 0.910714 0.915092 -0.667910 
 0.910714 0.915673 -0.645522 
 0.910714 0.916255 -0.623134 
 0.911990 0.916255 -0.634328 
 0.911990 0.916836 -0.626866 
 0.911990 0.917418 -0.619403 
 0.913265 0.917418 -0.641791 
 0.913265 0.917999 -0.634328 
 0.913265 0.918581 -0.630597 
 0.914541 0.919163 -0.641791 
 0.914541 0.919744 -0.630597 
 0.914541 0.920326 -0.600746 
 0.915816 0.920326 -0.630597 
 0.915816 0.920907 -0.623134 
 0.915816 0.921489 -0.634328 
 0.917092 0.921489 -0.664179 
 0.917092 0.922070 -0.667910 
 0.917092 0.922652 -0.652985 
 0.918367 0.922652 -0.660448 
 0.918367 0.923233 -0.645522 
 0.918367 0.923815 -0.615672 
 0.919643 0.923815 -0.645522 
 0.919643 0.924397 -0.630597 
 0.919643 0.924978 -0.615672 
 0.920918 0.924978 -0.641791 
 0.920918 0.925560 -0.630597 
 0.920918 0.926141 -0.623134 
 0.922194 0.926141 -0.641791 
 0.922194 0.926723 -0.634328 
 0.922194 0.927304 -0.630597 
 0.922194 0.927886 -0.638060 
 0.923469 0.927886 -0.656716 
 0.923469 0.928468 -0.649254 
 0.923469 0.929049 -0.634328 
 0.924745 0.929049 -0.652985 
 0.924745 0.929631 -0.641791 
 0.924745 0.930212 -0.626866 
 0.926020 0.930212 -0.645522 
 0.926020 0.930794 -0.638060 
 0.926020 0.931375 -0.638060 
 0.927296 0.931375 -0.645522 
 0.927296 0.931957 -0.634328 
 0.927296 0.932539 -0.611940 
 0.928571 0.932539 -0.626866 
 0.928571 0.933120 -0.623134 
 0.928571 0.933702 -0.615672 
 0.929847 0.933702 -0.641791 
 0.929847 0.934283 -0.634328 
 0.929847 0.934865 -0.619403 
 0.929847 0.935446 -0.604478 
 0.931122 0.935446 -0.623134 
 0.931122 0.936028 -0.600746 
 0.931122 0.936609 -0.585821 
 0.932398 0.936609 -0.608209 
 0.932398 0.937191 -0.604478 
 0.932398 0.937773 -0.611940 
 0.933673 0.937773 -0.626866 
 0.933673 0.938354 -0.638060 
 0.933673 0.938936 -0.634328 
 0.934949 0.938936 -0.641791 
 0.934949 0.939517 -0.641791 
 0.934949 0.940099 -0.638060 
 0.936224 0.940099 -0.634328 
 0.936224 0.940680 -0.626866 
 0.936224 0.941262 -0.623134 
 0.937500 0.941262 -0.615672 
 0.937500 0.941844 -0.615672 
 0.937500 0.942425 -0.608209 
 0.937500 0.943007 -0.604478 
 0.938776 0.943007 -0.597015 
 0.938776 0.943588 -0.597015 
 0.938776 0.944170 -0.604478 
 0.940051 0.944170 -0.593284 
 0.940051 0.944751 -0.585821 
 0.940051 0.945333 -0.585821 
 0.941327 0.945333 -0.585821 
 0.941327 0.945915 -0.585821 
 0.941327 0.946496 -0.582090 
 0.942602 0.946496 -0.582090 
 0.942602 0.947078 -0.574627 
 0.942602 0.947659 -0.555970 
 0.943878 0.947659 -0.552239 
 0.943878 0.948241 -0.537313 
 0.943878 0.948822 -0.511194 
 0.945153 0.948822 -0.507463 
 0.945153 0.949404 -0.485075 
 0.945153 0.949985 -0.444030 
 0.945153 0.950567 -0.414179 
 0.946429 0.950567 -0.399254 
 0.946429 0.951149 -0.373134 
 0.946429 0.951730 -0.361940 
 0.947704 0.951730 -0.343284 
 0.947704 0.952312 -0.335821 
 0.947704 0.952893 -0.335821 
 0.948980 0.952893 -0.313433 
 0.948980 0.953475 -0.317164 
 0.948980 0.954056 -0.320896 
 0.950255 0.954056 -0.294776 
 0.950255 0.954638 -0.291045 
 0.950255 0.955220 -0.276119 
 0.951531 0.955220 -0.253731 
 0.951531 0.955801 -0.242537 
 0.951531 0.956383 -0.220149 
 0.952806 0.956383 -0.194030 
 0.952806 0.956964 -0.179104 
 0.952806 0.957546 -0.149254 
 0.952806 0.958127 -0.126866 
 0.954082 0.958127 -0.115672 
 0.954082 0.958709 -0.100746 
 0.954082 0.959290 -0.089552 
 0.955357 0.959290 -0.082090 
 0.955357 0.959872 -0.063433 
 0.955357 0.960454 -0.055970 
 0.956633 0.960454 -0.048507 
 0.956633 0.961035 -0.029851 
 0.956633 0.961617 -0.022388 
 0.957908 0.961617 -0.014925 
 0.957908 0.962198 -0.003731 
 0.957908 0.962780 0.007463 
 0.959184 0.962780 0.011194 
 0.959184 0.963361 0.029851 
 0.959184 0.963943 0.033582 
 0.959184 0.964525 0.041045 
 0.960459 0.964525 0.037313 
 0.960459 0.965106 0.048507 
 0.960459 0.965688 0.063433 
 0.961735 0.965688 0.048507 
 0.961735 0.966269 0.067164 
 0.961735 0.966851 0.067164 
 0.963010 0.966851 0.067164 
 0.963010 0.967432 0.063433 
 0.963010 0.968014 0.052239 
 0.964286 0.968014 0.055970 
 0.964286 0.968596 0.033582 
 0.964286 0.969177 0.018657 
 0.965561 0.969177 0.022388 
 0.965561 0.969759 0.000000 
 0.965561 0.970340 -0.018657 
 0.966837 0.970340 -0.018657 
 0.966837 0.970922 -0.048507 
 0.966837 0.971503 -0.067164 
 0.966837 0.972085 -0.089552 
 0.968112 0.972085 -0.070896 
 0.968112 0.972666 -0.067164 
 0.968112 0.973248 -0.059701 
 0.969388 0.973248 -0.037313 
 0.969388 0.973830 -0.033582 
 0.969388 0.974411 -0.029851 
 0.970663 0.974411 -0.007463 
 0.970663 0.974993 0.000000 
 0.970663 0.975574 0.007463 
 0.971939 0.975574 0.026119 
 0.971939 0.976156 0.037313 
 0.971939 0.976737 0.044776 
 0.973214 0.976737 0.063433 
 0.973214 0.977319 0.074627 
 0.973214 0.977901 0.078358 
 0.973214 0.978482 0.067164 
 0.974490 0.978482 0.070896 
 0.974490 0.979064 0.059701 
 0.974490 0.979645 0.041045 
 0.975765 0.979645 0.044776 
 0.975765 0.980227 0.037313 
 0.975765 0.980808 0.033582 
 0.977041 0.980808 0.041045 
 0.977041 0.981390 0.041045 
 0.977041 0.981972 0.037313 
 0.978316 0.981972 0.048507 
 0.978316 0.982553 0.044776 
 0.978316 0.983135 0.037313 
 0.978316 0.983716 0.037313 
 0.979592 0.983716 0.041045 
 0.979592 0.984298 0.041045 
 0.979592 0.984879 0.029851 
 0.980867 0.984879 0.029851 
 0.980867 0.985461 0.026119 
 0.980867 0.986042 0.014925 
 0.982143 0.986042 -0.011194 
 0.982143 0.986624 -0.018657 
 0.982143 0.987206 -0.029851 
 0.982143 0.987787 -0.041045 
 0.983418 0.987787 -0.067164 
 0.983418 0.988369 -0.085821 
 0.983418 0.988950 -0.089552 
 0.984694 0.988950 -0.119403 
 0.984694 0.989532 -0.119403 
 0.984694 0.990113 -0.123134 
 0.985969 0.990113 -0.145522 
 0.985969 0.990695 -0.152985 
 0.985969 0.991277 -0.160448 
 0.985969 0.991858 -0.171642 
 0.987245 0.991858 -0.194030 
 
