# Supplementary material for: Terrain Referenced Navigation Using a Multilayer Radial Basis Function-Based Extreme Learning Machine
Source: Hindawi journal article supplement (doi:10.1155/2019/9142694), 2019-07-11
Supplement: f1 [file 9142694.f1.zip › 9142694_Supplementary information files/TrainDB_ML_RBF_ELM_Using AE2_180919/Evaluation_CIW_ML_ELM/TrainDBData2.dat]

-1.000000 -0.987206 0.059701 
 -0.998724 -0.987206 0.067164 
 -0.997449 -0.987206 0.078358 
 -0.996173 -0.987206 0.093284 
 -0.993622 -0.987206 0.126866 
 -0.991071 -0.987206 0.167910 
 -0.989796 -0.987206 0.182836 
 -0.988520 -0.987206 0.201493 
 -0.987245 -0.987206 0.216418 
 -0.998724 -0.986042 0.055970 
 -0.997449 -0.986042 0.063433 
 -0.996173 -0.986042 0.078358 
 -0.994898 -0.986042 0.097015 
 -0.992347 -0.986042 0.138060 
 -0.989796 -0.986042 0.175373 
 -0.988520 -0.986042 0.194030 
 -0.987245 -0.986042 0.208955 
 -0.985969 -0.986042 0.223881 
 -0.997449 -0.984879 0.093284 
 -0.996173 -0.984879 0.089552 
 -0.994898 -0.984879 0.089552 
 -0.993622 -0.984879 0.104478 
 -0.991071 -0.984879 0.149254 
 -0.988520 -0.984879 0.182836 
 -0.987245 -0.984879 0.201493 
 -0.985969 -0.984879 0.216418 
 -0.984694 -0.984879 0.235075 
 -0.996173 -0.983135 0.182836 
 -0.994898 -0.983135 0.179104 
 -0.993622 -0.983135 0.175373 
 -0.992347 -0.983135 0.167910 
 -0.989796 -0.983135 0.164179 
 -0.987245 -0.983135 0.194030 
 -0.985969 -0.983135 0.212687 
 -0.984694 -0.983135 0.235075 
 -0.983418 -0.983135 0.253731 
 -0.994898 -0.981972 0.223881 
 -0.993622 -0.981972 0.216418 
 -0.992347 -0.981972 0.212687 
 -0.991071 -0.981972 0.216418 
 -0.988520 -0.981972 0.231343 
 -0.985969 -0.981972 0.246269 
 -0.984694 -0.981972 0.253731 
 -0.983418 -0.981972 0.253731 
 -0.982143 -0.981972 0.253731 
 -0.993622 -1.000000 0.250000 
 -0.992347 -1.000000 0.261194 
 -0.991071 -1.000000 0.272388 
 -0.989796 -1.000000 0.283582 
 -0.987245 -1.000000 0.294776 
 -0.984694 -1.000000 0.283582 
 -0.983418 -1.000000 0.268657 
 -0.982143 -1.000000 0.235075 
 -0.980867 -1.000000 0.201493 
 -0.993622 -0.999418 0.276119 
 -0.992347 -0.999418 0.279851 
 -0.991071 -0.999418 0.291045 
 -0.989796 -0.999418 0.302239 
 -0.987245 -0.999418 0.309701 
 -0.984694 -0.999418 0.287313 
 -0.983418 -0.999418 0.272388 
 -0.982143 -0.999418 0.253731 
 -0.980867 -0.999418 0.216418 
 -0.993622 -0.998837 0.294776 
 -0.992347 -0.998837 0.298507 
 -0.991071 -0.998837 0.302239 
 -0.989796 -0.998837 0.313433 
 -0.987245 -0.998837 0.324627 
 -0.984694 -0.998837 0.291045 
 -0.983418 -0.998837 0.276119 
 -0.982143 -0.998837 0.257463 
 -0.980867 -0.998837 0.235075 
 -0.992347 -0.998837 0.298507 
 -0.991071 -0.998837 0.302239 
 -0.989796 -0.998837 0.313433 
 -0.988520 -0.998837 0.324627 
 -0.985969 -0.998837 0.309701 
 -0.983418 -0.998837 0.276119 
 -0.982143 -0.998837 0.257463 
 -0.980867 -0.998837 0.235075 
 -0.979592 -0.998837 0.227612 
 -0.992347 -0.998255 0.324627 
 -0.991071 -0.998255 0.324627 
 -0.989796 -0.998255 0.332090 
 -0.988520 -0.998255 0.339552 
 -0.985969 -0.998255 0.339552 
 -0.983418 -0.998255 0.302239 
 -0.982143 -0.998255 0.279851 
 -0.980867 -0.998255 0.261194 
 -0.979592 -0.998255 0.257463 
 -0.992347 -0.997674 0.339552 
 -0.991071 -0.997674 0.343284 
 -0.989796 -0.997674 0.347015 
 -0.988520 -0.997674 0.354478 
 -0.985969 -0.997674 0.354478 
 -0.983418 -0.997674 0.328358 
 -0.982143 -0.997674 0.305970 
 -0.980867 -0.997674 0.287313 
 -0.979592 -0.997674 0.264925 
 -0.992347 -0.997092 0.361940 
 -0.991071 -0.997092 0.376866 
 -0.989796 -0.997092 0.376866 
 -0.988520 -0.997092 0.380597 
 -0.985969 -0.997092 0.373134 
 -0.983418 -0.997092 0.343284 
 -0.982143 -0.997092 0.317164 
 -0.980867 -0.997092 0.291045 
 -0.979592 -0.997092 0.257463 
 -0.991071 -0.997092 0.376866 
 -0.989796 -0.997092 0.376866 
 -0.988520 -0.997092 0.380597 
 -0.987245 -0.997092 0.380597 
 -0.984694 -0.997092 0.361940 
 -0.982143 -0.997092 0.317164 
 -0.980867 -0.997092 0.291045 
 -0.979592 -0.997092 0.257463 
 -0.978316 -0.997092 0.246269 
 -0.991071 -0.996511 0.399254 
 -0.989796 -0.996511 0.399254 
 -0.988520 -0.996511 0.395522 
 -0.987245 -0.996511 0.391791 
 -0.984694 -0.996511 0.365672 
 -0.982143 -0.996511 0.317164 
 -0.980867 -0.996511 0.291045 
 -0.979592 -0.996511 0.253731 
 -0.978316 -0.996511 0.235075 
 -0.991071 -0.995929 0.414179 
 -0.989796 -0.995929 0.402985 
 -0.988520 -0.995929 0.402985 
 -0.987245 -0.995929 0.395522 
 -0.984694 -0.995929 0.365672 
 -0.982143 -0.995929 0.313433 
 -0.980867 -0.995929 0.287313 
 -0.979592 -0.995929 0.261194 
 -0.978316 -0.995929 0.231343 
 -0.991071 -0.995347 0.406716 
 -0.989796 -0.995347 0.402985 
 -0.988520 -0.995347 0.399254 
 -0.987245 -0.995347 0.391791 
 -0.984694 -0.995347 0.358209 
 -0.982143 -0.995347 0.309701 
 -0.980867 -0.995347 0.283582 
 -0.979592 -0.995347 0.257463 
 -0.978316 -0.995347 0.223881 
 -0.989796 -0.995347 0.402985 
 -0.988520 -0.995347 0.399254 
 -0.987245 -0.995347 0.391791 
 -0.985969 -0.995347 0.380597 
 -0.983418 -0.995347 0.335821 
 -0.980867 -0.995347 0.283582 
 -0.979592 -0.995347 0.257463 
 -0.978316 -0.995347 0.223881 
 -0.977041 -0.995347 0.201493 
 -0.989796 -0.994766 0.391791 
 -0.988520 -0.994766 0.388060 
 -0.987245 -0.994766 0.384328 
 -0.985969 -0.994766 0.373134 
 -0.983418 -0.994766 0.332090 
 -0.980867 -0.994766 0.279851 
 -0.979592 -0.994766 0.253731 
 -0.978316 -0.994766 0.231343 
 -0.977041 -0.994766 0.201493 
 -0.989796 -0.994184 0.365672 
 -0.988520 -0.994184 0.369403 
 -0.987245 -0.994184 0.369403 
 -0.985969 -0.994184 0.361940 
 -0.983418 -0.994184 0.328358 
 -0.980867 -0.994184 0.276119 
 -0.979592 -0.994184 0.250000 
 -0.978316 -0.994184 0.231343 
 -0.977041 -0.994184 0.201493 
 -0.989796 -0.993603 0.343284 
 -0.988520 -0.993603 0.350746 
 -0.987245 -0.993603 0.350746 
 -0.985969 -0.993603 0.350746 
 -0.983418 -0.993603 0.328358 
 -0.980867 -0.993603 0.279851 
 -0.979592 -0.993603 0.257463 
 -0.978316 -0.993603 0.235075 
 -0.977041 -0.993603 0.205224 
 -0.988520 -0.993021 0.317164 
 -0.987245 -0.993021 0.324627 
 -0.985969 -0.993021 0.328358 
 -0.984694 -0.993021 0.328358 
 -0.982143 -0.993021 0.305970 
 -0.979592 -0.993021 0.261194 
 -0.978316 -0.993021 0.235075 
 -0.977041 -0.993021 0.212687 
 -0.975765 -0.993021 0.179104 
 -0.988520 -0.992440 0.298507 
 -0.987245 -0.992440 0.302239 
 -0.985969 -0.992440 0.309701 
 -0.984694 -0.992440 0.309701 
 -0.982143 -0.992440 0.298507 
 -0.979592 -0.992440 0.257463 
 -0.978316 -0.992440 0.235075 
 -0.977041 -0.992440 0.208955 
 -0.975765 -0.992440 0.175373 
 -0.988520 -0.991858 0.272388 
 -0.987245 -0.991858 0.279851 
 -0.985969 -0.991858 0.283582 
 -0.984694 -0.991858 0.291045 
 -0.982143 -0.991858 0.283582 
 -0.979592 -0.991858 0.246269 
 -0.978316 -0.991858 0.223881 
 -0.977041 -0.991858 0.201493 
 -0.975765 -0.991858 0.179104 
 -0.988520 -0.991277 0.253731 
 -0.987245 -0.991277 0.261194 
 -0.985969 -0.991277 0.272388 
 -0.984694 -0.991277 0.287313 
 -0.982143 -0.991277 0.279851 
 -0.979592 -0.991277 0.238806 
 -0.978316 -0.991277 0.216418 
 -0.977041 -0.991277 0.201493 
 -0.975765 -0.991277 0.190299 
 -0.987245 -0.991277 0.261194 
 -0.985969 -0.991277 0.272388 
 -0.984694 -0.991277 0.287313 
 -0.983418 -0.991277 0.287313 
 -0.980867 -0.991277 0.261194 
 -0.978316 -0.991277 0.216418 
 -0.977041 -0.991277 0.201493 
 -0.975765 -0.991277 0.190299 
 -0.974490 -0.991277 0.175373 
 -0.987245 -0.990695 0.246269 
 -0.985969 -0.990695 0.264925 
 -0.984694 -0.990695 0.276119 
 -0.983418 -0.990695 0.283582 
 -0.980867 -0.990695 0.253731 
 -0.978316 -0.990695 0.231343 
 -0.977041 -0.990695 0.227612 
 -0.975765 -0.990695 0.223881 
 -0.974490 -0.990695 0.208955 
 -0.987245 -0.990113 0.238806 
 -0.985969 -0.990113 0.257463 
 -0.984694 -0.990113 0.272388 
 -0.983418 -0.990113 0.279851 
 -0.980867 -0.990113 0.272388 
 -0.978316 -0.990113 0.257463 
 -0.977041 -0.990113 0.250000 
 -0.975765 -0.990113 0.242537 
 -0.974490 -0.990113 0.231343 
 -0.987245 -0.989532 0.231343 
 -0.985969 -0.989532 0.250000 
 -0.984694 -0.989532 0.264925 
 -0.983418 -0.989532 0.279851 
 -0.980867 -0.989532 0.291045 
 -0.978316 -0.989532 0.287313 
 -0.977041 -0.989532 0.279851 
 -0.975765 -0.989532 0.268657 
 -0.974490 -0.989532 0.257463 
 -0.985969 -0.989532 0.250000 
 -0.984694 -0.989532 0.264925 
 -0.983418 -0.989532 0.279851 
 -0.982143 -0.989532 0.287313 
 -0.979592 -0.989532 0.291045 
 -0.977041 -0.989532 0.279851 
 -0.975765 -0.989532 0.268657 
 -0.974490 -0.989532 0.257463 
 -0.973214 -0.989532 0.238806 
 -0.985969 -0.988950 0.246269 
 -0.984694 -0.988950 0.261194 
 -0.983418 -0.988950 0.276119 
 -0.982143 -0.988950 0.287313 
 -0.979592 -0.988950 0.302239 
 -0.977041 -0.988950 0.298507 
 -0.975765 -0.988950 0.287313 
 -0.974490 -0.988950 0.272388 
 -0.973214 -0.988950 0.261194 
 -0.985969 -0.988369 0.242537 
 -0.984694 -0.988369 0.257463 
 -0.983418 -0.988369 0.272388 
 -0.982143 -0.988369 0.283582 
 -0.979592 -0.988369 0.305970 
 -0.977041 -0.988369 0.313433 
 -0.975765 -0.988369 0.309701 
 -0.974490 -0.988369 0.298507 
 -0.973214 -0.988369 0.287313 
 -0.985969 -0.987787 0.238806 
 -0.984694 -0.987787 0.253731 
 -0.983418 -0.987787 0.268657 
 -0.982143 -0.987787 0.279851 
 -0.979592 -0.987787 0.302239 
 -0.977041 -0.987787 0.313433 
 -0.975765 -0.987787 0.309701 
 -0.974490 -0.987787 0.302239 
 -0.973214 -0.987787 0.291045 
 -0.984694 -0.987787 0.253731 
 -0.983418 -0.987787 0.268657 
 -0.982143 -0.987787 0.279851 
 -0.980867 -0.987787 0.291045 
 -0.978316 -0.987787 0.309701 
 -0.975765 -0.987787 0.309701 
 -0.974490 -0.987787 0.302239 
 -0.973214 -0.987787 0.291045 
 -0.971939 -0.987787 0.272388 
 -0.984694 -0.987206 0.250000 
 -0.983418 -0.987206 0.264925 
 -0.982143 -0.987206 0.279851 
 -0.980867 -0.987206 0.291045 
 -0.978316 -0.987206 0.309701 
 -0.975765 -0.987206 0.305970 
 -0.974490 -0.987206 0.294776 
 -0.973214 -0.987206 0.279851 
 -0.971939 -0.987206 0.276119 
 -0.984694 -0.986624 0.246269 
 -0.983418 -0.986624 0.261194 
 -0.982143 -0.986624 0.276119 
 -0.980867 -0.986624 0.287313 
 -0.978316 -0.986624 0.302239 
 -0.975765 -0.986624 0.283582 
 -0.974490 -0.986624 0.264925 
 -0.973214 -0.986624 0.253731 
 -0.971939 -0.986624 0.250000 
 -0.984694 -0.986042 0.242537 
 -0.983418 -0.986042 0.257463 
 -0.982143 -0.986042 0.272388 
 -0.980867 -0.986042 0.283582 
 -0.978316 -0.986042 0.291045 
 -0.975765 -0.986042 0.272388 
 -0.974490 -0.986042 0.250000 
 -0.973214 -0.986042 0.238806 
 -0.971939 -0.986042 0.227612 
 -0.983418 -0.986042 0.257463 
 -0.982143 -0.986042 0.272388 
 -0.980867 -0.986042 0.283582 
 -0.979592 -0.986042 0.291045 
 -0.977041 -0.986042 0.291045 
 -0.974490 -0.986042 0.250000 
 -0.973214 -0.986042 0.238806 
 -0.971939 -0.986042 0.227612 
 -0.970663 -0.986042 0.223881 
 -0.983418 -0.985461 0.253731 
 -0.982143 -0.985461 0.272388 
 -0.980867 -0.985461 0.279851 
 -0.979592 -0.985461 0.291045 
 -0.977041 -0.985461 0.276119 
 -0.974490 -0.985461 0.231343 
 -0.973214 -0.985461 0.216418 
 -0.971939 -0.985461 0.205224 
 -0.970663 -0.985461 0.194030 
 -0.983418 -0.984879 0.253731 
 -0.982143 -0.984879 0.268657 
 -0.980867 -0.984879 0.279851 
 -0.979592 -0.984879 0.283582 
 -0.977041 -0.984879 0.257463 
 -0.974490 -0.984879 0.220149 
 -0.973214 -0.984879 0.205224 
 -0.971939 -0.984879 0.190299 
 -0.970663 -0.984879 0.179104 
 -0.983418 -0.984298 0.253731 
 -0.982143 -0.984298 0.264925 
 -0.980867 -0.984298 0.272388 
 -0.979592 -0.984298 0.272388 
 -0.977041 -0.984298 0.235075 
 -0.974490 -0.984298 0.201493 
 -0.973214 -0.984298 0.186567 
 -0.971939 -0.984298 0.175373 
 -0.970663 -0.984298 0.160448 
 -0.982143 -0.984298 0.264925 
 -0.980867 -0.984298 0.272388 
 -0.979592 -0.984298 0.272388 
 -0.978316 -0.984298 0.257463 
 -0.975765 -0.984298 0.216418 
 -0.973214 -0.984298 0.186567 
 -0.971939 -0.984298 0.175373 
 -0.970663 -0.984298 0.160448 
 -0.969388 -0.984298 0.149254 
 -0.982143 -0.983716 0.261194 
 -0.980867 -0.983716 0.264925 
 -0.979592 -0.983716 0.257463 
 -0.978316 -0.983716 0.238806 
 -0.975765 -0.983716 0.197761 
 -0.973214 -0.983716 0.171642 
 -0.971939 -0.983716 0.160448 
 -0.970663 -0.983716 0.149254 
 -0.969388 -0.983716 0.138060 
 -0.982143 -0.983135 0.253731 
 -0.980867 -0.983135 0.253731 
 -0.979592 -0.983135 0.238806 
 -0.978316 -0.983135 0.216418 
 -0.975765 -0.983135 0.167910 
 -0.973214 -0.983135 0.145522 
 -0.971939 -0.983135 0.138060 
 -0.970663 -0.983135 0.130597 
 -0.969388 -0.983135 0.119403 
 -0.982143 -0.982553 0.253731 
 -0.980867 -0.982553 0.253731 
 -0.979592 -0.982553 0.231343 
 -0.978316 -0.982553 0.205224 
 -0.975765 -0.982553 0.152985 
 -0.973214 -0.982553 0.130597 
 -0.971939 -0.982553 0.123134 
 -0.970663 -0.982553 0.115672 
 -0.969388 -0.982553 0.108209 
 -0.980867 -0.982553 0.253731 
 -0.979592 -0.982553 0.231343 
 -0.978316 -0.982553 0.205224 
 -0.977041 -0.982553 0.179104 
 -0.974490 -0.982553 0.141791 
 -0.971939 -0.982553 0.123134 
 -0.970663 -0.982553 0.115672 
 -0.969388 -0.982553 0.108209 
 -0.968112 -0.982553 0.097015 
 -0.980867 -0.981972 0.238806 
 -0.979592 -0.981972 0.216418 
 -0.978316 -0.981972 0.190299 
 -0.977041 -0.981972 0.167910 
 -0.974490 -0.981972 0.126866 
 -0.971939 -0.981972 0.100746 
 -0.970663 -0.981972 0.093284 
 -0.969388 -0.981972 0.085821 
 -0.968112 -0.981972 0.078358 
 -0.980867 -0.981390 0.223881 
 -0.979592 -0.981390 0.201493 
 -0.978316 -0.981390 0.179104 
 -0.977041 -0.981390 0.156716 
 -0.974490 -0.981390 0.119403 
 -0.971939 -0.981390 0.085821 
 -0.970663 -0.981390 0.078358 
 -0.969388 -0.981390 0.070896 
 -0.968112 -0.981390 0.059701 
 -0.980867 -0.980808 0.205224 
 -0.979592 -0.980808 0.182836 
 -0.978316 -0.980808 0.160448 
 -0.977041 -0.980808 0.141791 
 -0.974490 -0.980808 0.104478 
 -0.971939 -0.980808 0.067164 
 -0.970663 -0.980808 0.067164 
 -0.969388 -0.980808 0.052239 
 -0.968112 -0.980808 0.048507 
 -0.979592 -0.980808 0.182836 
 -0.978316 -0.980808 0.160448 
 -0.977041 -0.980808 0.141791 
 -0.975765 -0.980808 0.123134 
 -0.973214 -0.980808 0.082090 
 -0.970663 -0.980808 0.067164 
 -0.969388 -0.980808 0.052239 
 -0.968112 -0.980808 0.048507 
 -0.966837 -0.980808 0.041045 
 -0.979592 -0.980227 0.171642 
 -0.978316 -0.980227 0.149254 
 -0.977041 -0.980227 0.134328 
 -0.975765 -0.980227 0.115672 
 -0.973214 -0.980227 0.089552 
 -0.970663 -0.980227 0.078358 
 -0.969388 -0.980227 0.074627 
 -0.968112 -0.980227 0.063433 
 -0.966837 -0.980227 0.055970 
 -0.979592 -0.979645 0.186567 
 -0.978316 -0.979645 0.171642 
 -0.977041 -0.979645 0.156716 
 -0.975765 -0.979645 0.145522 
 -0.973214 -0.979645 0.126866 
 -0.970663 -0.979645 0.115672 
 -0.969388 -0.979645 0.104478 
 -0.968112 -0.979645 0.093284 
 -0.966837 -0.979645 0.078358 
 -0.979592 -0.979064 0.212687 
 -0.978316 -0.979064 0.197761 
 -0.977041 -0.979064 0.186567 
 -0.975765 -0.979064 0.175373 
 -0.973214 -0.979064 0.152985 
 -0.970663 -0.979064 0.134328 
 -0.969388 -0.979064 0.123134 
 -0.968112 -0.979064 0.108209 
 -0.966837 -0.979064 0.093284 
 -0.978316 -0.979064 0.197761 
 -0.977041 -0.979064 0.186567 
 -0.975765 -0.979064 0.175373 
 -0.974490 -0.979064 0.164179 
 -0.971939 -0.979064 0.145522 
 -0.969388 -0.979064 0.123134 
 -0.968112 -0.979064 0.108209 
 -0.966837 -0.979064 0.093284 
 -0.965561 -0.979064 0.078358 
 -0.978316 -0.978482 0.216418 
 -0.977041 -0.978482 0.201493 
 -0.975765 -0.978482 0.197761 
 -0.974490 -0.978482 0.186567 
 -0.971939 -0.978482 0.164179 
 -0.969388 -0.978482 0.138060 
 -0.968112 -0.978482 0.119403 
 -0.966837 -0.978482 0.104478 
 -0.965561 -0.978482 0.085821 
 -0.978316 -0.977901 0.194030 
 -0.977041 -0.977901 0.186567 
 -0.975765 -0.977901 0.182836 
 -0.974490 -0.977901 0.175373 
 -0.971939 -0.977901 0.160448 
 -0.969388 -0.977901 0.138060 
 -0.968112 -0.977901 0.126866 
 -0.966837 -0.977901 0.111940 
 -0.965561 -0.977901 0.093284 
 -0.978316 -0.977319 0.171642 
 -0.977041 -0.977319 0.164179 
 -0.975765 -0.977319 0.156716 
 -0.974490 -0.977319 0.152985 
 -0.971939 -0.977319 0.138060 
 -0.969388 -0.977319 0.123134 
 -0.968112 -0.977319 0.115672 
 -0.966837 -0.977319 0.104478 
 -0.965561 -0.977319 0.089552 
 -0.977041 -0.977319 0.164179 
 -0.975765 -0.977319 0.156716 
 -0.974490 -0.977319 0.152985 
 -0.973214 -0.977319 0.145522 
 -0.970663 -0.977319 0.130597 
 -0.968112 -0.977319 0.115672 
 -0.966837 -0.977319 0.104478 
 -0.965561 -0.977319 0.089552 
 -0.964286 -0.977319 0.074627 
 -0.977041 -0.976737 0.126866 
 -0.975765 -0.976737 0.123134 
 -0.974490 -0.976737 0.115672 
 -0.973214 -0.976737 0.108209 
 -0.970663 -0.976737 0.097015 
 -0.968112 -0.976737 0.085821 
 -0.966837 -0.976737 0.078358 
 -0.965561 -0.976737 0.070896 
 -0.964286 -0.976737 0.059701 
 -0.977041 -0.976156 0.104478 
 -0.975765 -0.976156 0.097015 
 -0.974490 -0.976156 0.089552 
 -0.973214 -0.976156 0.085821 
 -0.970663 -0.976156 0.074627 
 -0.968112 -0.976156 0.063433 
 -0.966837 -0.976156 0.055970 
 -0.965561 -0.976156 0.048507 
 -0.964286 -0.976156 0.041045 
 -0.977041 -0.975574 0.067164 
 -0.975765 -0.975574 0.063433 
 -0.974490 -0.975574 0.055970 
 -0.973214 -0.975574 0.052239 
 -0.970663 -0.975574 0.041045 
 -0.968112 -0.975574 0.029851 
 -0.966837 -0.975574 0.026119 
 -0.965561 -0.975574 0.018657 
 -0.964286 -0.975574 0.011194 
 -0.975765 -0.975574 0.063433 
 -0.974490 -0.975574 0.055970 
 -0.973214 -0.975574 0.052239 
 -0.971939 -0.975574 0.044776 
 -0.969388 -0.975574 0.033582 
 -0.966837 -0.975574 0.026119 
 -0.965561 -0.975574 0.018657 
 -0.964286 -0.975574 0.011194 
 -0.963010 -0.975574 0.003731 
 -0.975765 -0.974993 0.055970 
 -0.974490 -0.974993 0.048507 
 -0.973214 -0.974993 0.041045 
 -0.971939 -0.974993 0.029851 
 -0.969388 -0.974993 0.014925 
 -0.966837 -0.974993 0.003731 
 -0.965561 -0.974993 -0.003731 
 -0.964286 -0.974993 -0.007463 
 -0.963010 -0.974993 -0.014925 
 -0.975765 -0.974411 0.093284 
 -0.974490 -0.974411 0.074627 
 -0.973214 -0.974411 0.063433 
 -0.971939 -0.974411 0.048507 
 -0.969388 -0.974411 0.018657 
 -0.966837 -0.974411 -0.007463 
 -0.965561 -0.974411 -0.022388 
 -0.964286 -0.974411 -0.041045 
 -0.963010 -0.974411 -0.052239 
 -0.975765 -0.973830 0.119403 
 -0.974490 -0.973830 0.100746 
 -0.973214 -0.973830 0.085821 
 -0.971939 -0.973830 0.074627 
 -0.969388 -0.973830 0.044776 
 -0.966837 -0.973830 0.011194 
 -0.965561 -0.973830 -0.007463 
 -0.964286 -0.973830 -0.029851 
 -0.963010 -0.973830 -0.044776 
 -0.974490 -0.973830 0.100746 
 -0.973214 -0.973830 0.085821 
 -0.971939 -0.973830 0.074627 
 -0.970663 -0.973830 0.059701 
 -0.968112 -0.973830 0.029851 
 -0.965561 -0.973830 -0.007463 
 -0.964286 -0.973830 -0.029851 
 -0.963010 -0.973830 -0.044776 
 -0.961735 -0.973830 -0.063433 
 -0.974490 -0.973248 0.134328 
 -0.973214 -0.973248 0.115672 
 -0.971939 -0.973248 0.100746 
 -0.970663 -0.973248 0.085821 
 -0.968112 -0.973248 0.055970 
 -0.965561 -0.973248 0.014925 
 -0.964286 -0.973248 -0.007463 
 -0.963010 -0.973248 -0.029851 
 -0.961735 -0.973248 -0.044776 
 -0.974490 -0.972666 0.141791 
 -0.973214 -0.972666 0.130597 
 -0.971939 -0.972666 0.111940 
 -0.970663 -0.972666 0.100746 
 -0.968112 -0.972666 0.070896 
 -0.965561 -0.972666 0.026119 
 -0.964286 -0.972666 0.003731 
 -0.963010 -0.972666 -0.018657 
 -0.961735 -0.972666 -0.037313 
 -0.974490 -0.972085 0.141791 
 -0.973214 -0.972085 0.130597 
 -0.971939 -0.972085 0.115672 
 -0.970663 -0.972085 0.104478 
 -0.968112 -0.972085 0.078358 
 -0.965561 -0.972085 0.037313 
 -0.964286 -0.972085 0.014925 
 -0.963010 -0.972085 -0.007463 
 -0.961735 -0.972085 -0.029851 
 -0.973214 -0.972085 0.130597 
 -0.971939 -0.972085 0.115672 
 -0.970663 -0.972085 0.104478 
 -0.969388 -0.972085 0.089552 
 -0.966837 -0.972085 0.059701 
 -0.964286 -0.972085 0.014925 
 -0.963010 -0.972085 -0.007463 
 -0.961735 -0.972085 -0.029851 
 -0.960459 -0.972085 -0.048507 
 -0.973214 -0.971503 0.119403 
 -0.971939 -0.971503 0.108209 
 -0.970663 -0.971503 0.097015 
 -0.969388 -0.971503 0.085821 
 -0.966837 -0.971503 0.055970 
 -0.964286 -0.971503 0.011194 
 -0.963010 -0.971503 -0.011194 
 -0.961735 -0.971503 -0.033582 
 -0.960459 -0.971503 -0.052239 
 -0.973214 -0.970922 0.097015 
 -0.971939 -0.970922 0.085821 
 -0.970663 -0.970922 0.074627 
 -0.969388 -0.970922 0.063433 
 -0.966837 -0.970922 0.033582 
 -0.964286 -0.970922 -0.003731 
 -0.963010 -0.970922 -0.026119 
 -0.961735 -0.970922 -0.048507 
 -0.960459 -0.970922 -0.063433 
 -0.973214 -0.970340 0.078358 
 -0.971939 -0.970340 0.070896 
 -0.970663 -0.970340 0.055970 
 -0.969388 -0.970340 0.044776 
 -0.966837 -0.970340 0.014925 
 -0.964286 -0.970340 -0.018657 
 -0.963010 -0.970340 -0.037313 
 -0.961735 -0.970340 -0.055970 
 -0.960459 -0.970340 -0.063433 
 -0.971939 -0.970340 0.070896 
 -0.970663 -0.970340 0.055970 
 -0.969388 -0.970340 0.044776 
 -0.968112 -0.970340 0.029851 
 -0.965561 -0.970340 0.000000 
 -0.963010 -0.970340 -0.037313 
 -0.961735 -0.970340 -0.055970 
 -0.960459 -0.970340 -0.063433 
 -0.959184 -0.970340 -0.074627 
 -0.971939 -0.969759 0.048507 
 -0.970663 -0.969759 0.041045 
 -0.969388 -0.969759 0.026119 
 -0.968112 -0.969759 0.011194 
 -0.965561 -0.969759 -0.014925 
 -0.963010 -0.969759 -0.044776 
 -0.961735 -0.969759 -0.052239 
 -0.960459 -0.969759 -0.052239 
 -0.959184 -0.969759 -0.052239 
 -0.971939 -0.969177 0.037313 
 -0.970663 -0.969177 0.029851 
 -0.969388 -0.969177 0.014925 
 -0.968112 -0.969177 0.007463 
 -0.965561 -0.969177 -0.014925 
 -0.963010 -0.969177 -0.018657 
 -0.961735 -0.969177 -0.018657 
 -0.960459 -0.969177 -0.014925 
 -0.959184 -0.969177 -0.018657 
 -0.971939 -0.968596 0.059701 
 -0.970663 -0.968596 0.052239 
 -0.969388 -0.968596 0.044776 
 -0.968112 -0.968596 0.033582 
 -0.965561 -0.968596 0.011194 
 -0.963010 -0.968596 0.000000 
 -0.961735 -0.968596 0.000000 
 -0.960459 -0.968596 -0.003731 
 -0.959184 -0.968596 -0.011194 
 -0.970663 -0.968596 0.052239 
 -0.969388 -0.968596 0.044776 
 -0.968112 -0.968596 0.033582 
 -0.966837 -0.968596 0.018657 
 -0.964286 -0.968596 0.003731 
 -0.961735 -0.968596 0.000000 
 -0.960459 -0.968596 -0.003731 
 -0.959184 -0.968596 -0.011194 
 -0.957908 -0.968596 -0.018657 
 -0.970663 -0.968014 0.082090 
 -0.969388 -0.968014 0.070896 
 -0.968112 -0.968014 0.055970 
 -0.966837 -0.968014 0.041045 
 -0.964286 -0.968014 0.022388 
 -0.961735 -0.968014 0.007463 
 -0.960459 -0.968014 0.000000 
 -0.959184 -0.968014 -0.007463 
 -0.957908 -0.968014 -0.018657 
 -0.970663 -0.967432 0.097015 
 -0.969388 -0.967432 0.082090 
 -0.968112 -0.967432 0.063433 
 -0.966837 -0.967432 0.044776 
 -0.964286 -0.967432 0.022388 
 -0.961735 -0.967432 0.003731 
 -0.960459 -0.967432 -0.003731 
 -0.959184 -0.967432 -0.018657 
 -0.957908 -0.967432 -0.029851 
 -0.970663 -0.966851 0.108209 
 -0.969388 -0.966851 0.085821 
 -0.968112 -0.966851 0.063433 
 -0.966837 -0.966851 0.033582 
 -0.964286 -0.966851 0.011194 
 -0.961735 -0.966851 -0.003731 
 -0.960459 -0.966851 -0.018657 
 -0.959184 -0.966851 -0.033582 
 -0.957908 -0.966851 -0.041045 
 -0.969388 -0.966851 0.085821 
 -0.968112 -0.966851 0.063433 
 -0.966837 -0.966851 0.033582 
 -0.965561 -0.966851 0.022388 
 -0.963010 -0.966851 0.003731 
 -0.960459 -0.966851 -0.018657 
 -0.959184 -0.966851 -0.033582 
 -0.957908 -0.966851 -0.041045 
 -0.956633 -0.966851 -0.052239 
 -0.969388 -0.966269 0.085821 
 -0.968112 -0.966269 0.063433 
 -0.966837 -0.966269 0.029851 
 -0.965561 -0.966269 0.014925 
 -0.963010 -0.966269 -0.003731 
 -0.960459 -0.966269 -0.033582 
 -0.959184 -0.966269 -0.041045 
 -0.957908 -0.966269 -0.048507 
 -0.956633 -0.966269 -0.059701 
 -0.969388 -0.965688 0.100746 
 -0.968112 -0.965688 0.078358 
 -0.966837 -0.965688 0.055970 
 -0.965561 -0.965688 0.033582 
 -0.963010 -0.965688 -0.011194 
 -0.960459 -0.965688 -0.037313 
 -0.959184 -0.965688 -0.041045 
 -0.957908 -0.965688 -0.044776 
 -0.956633 -0.965688 -0.044776 
 -0.969388 -0.965106 0.115672 
 -0.968112 -0.965106 0.093284 
 -0.966837 -0.965106 0.070896 
 -0.965561 -0.965106 0.048507 
 -0.963010 -0.965106 0.003731 
 -0.960459 -0.965106 -0.011194 
 -0.959184 -0.965106 -0.011194 
 -0.957908 -0.965106 -0.011194 
 -0.956633 -0.965106 -0.011194 
 -0.968112 -0.965106 0.093284 
 -0.966837 -0.965106 0.070896 
 -0.965561 -0.965106 0.048507 
 -0.964286 -0.965106 0.022388 
 -0.961735 -0.965106 -0.003731 
 -0.959184 -0.965106 -0.011194 
 -0.957908 -0.965106 -0.011194 
 -0.956633 -0.965106 -0.011194 
 -0.955357 -0.965106 -0.014925 
 -0.968112 -0.964525 0.104478 
 -0.966837 -0.964525 0.078358 
 -0.965561 -0.964525 0.052239 
 -0.964286 -0.964525 0.033582 
 -0.961735 -0.964525 0.029851 
 -0.959184 -0.964525 0.029851 
 -0.957908 -0.964525 0.029851 
 -0.956633 -0.964525 0.026119 
 -0.955357 -0.964525 0.026119 
 -0.968112 -0.963943 0.108209 
 -0.966837 -0.963943 0.078358 
 -0.965561 -0.963943 0.055970 
 -0.964286 -0.963943 0.044776 
 -0.961735 -0.963943 0.048507 
 -0.959184 -0.963943 0.052239 
 -0.957908 -0.963943 0.052239 
 -0.956633 -0.963943 0.052239 
 -0.955357 -0.963943 0.048507 
 -0.968112 -0.963361 0.115672 
 -0.966837 -0.963361 0.093284 
 -0.965561 -0.963361 0.082090 
 -0.964286 -0.963361 0.078358 
 -0.961735 -0.963361 0.085821 
 -0.959184 -0.963361 0.089552 
 -0.957908 -0.963361 0.085821 
 -0.956633 -0.963361 0.082090 
 -0.955357 -0.963361 0.067164 
 -0.966837 -0.963361 0.093284 
 -0.965561 -0.963361 0.082090 
 -0.964286 -0.963361 0.078358 
 -0.963010 -0.963361 0.082090 
 -0.960459 -0.963361 0.089552 
 -0.957908 -0.963361 0.085821 
 -0.956633 -0.963361 0.082090 
 -0.955357 -0.963361 0.067164 
 -0.954082 -0.963361 0.055970 
 -0.966837 -0.962780 0.115672 
 -0.965561 -0.962780 0.111940 
 -0.964286 -0.962780 0.111940 
 -0.963010 -0.962780 0.111940 
 -0.960459 -0.962780 0.111940 
 -0.957908 -0.962780 0.100746 
 -0.956633 -0.962780 0.089552 
 -0.955357 -0.962780 0.078358 
 -0.954082 -0.962780 0.055970 
 -0.966837 -0.962198 0.145522 
 -0.965561 -0.962198 0.149254 
 -0.964286 -0.962198 0.152985 
 -0.963010 -0.962198 0.152985 
 -0.960459 -0.962198 0.138060 
 -0.957908 -0.962198 0.115672 
 -0.956633 -0.962198 0.100746 
 -0.955357 -0.962198 0.085821 
 -0.954082 -0.962198 0.059701 
 -0.966837 -0.961617 0.160448 
 -0.965561 -0.961617 0.160448 
 -0.964286 -0.961617 0.160448 
 -0.963010 -0.961617 0.164179 
 -0.960459 -0.961617 0.149254 
 -0.957908 -0.961617 0.123134 
 -0.956633 -0.961617 0.100746 
 -0.955357 -0.961617 0.085821 
 -0.954082 -0.961617 0.067164 
 -0.965561 -0.961617 0.160448 
 -0.964286 -0.961617 0.160448 
 -0.963010 -0.961617 0.164179 
 -0.961735 -0.961617 0.160448 
 -0.959184 -0.961617 0.134328 
 -0.956633 -0.961617 0.100746 
 -0.955357 -0.961617 0.085821 
 -0.954082 -0.961617 0.067164 
 -0.952806 -0.961617 0.041045 
 -0.965561 -0.961035 0.160448 
 -0.964286 -0.961035 0.160448 
 -0.963010 -0.961035 0.160448 
 -0.961735 -0.961035 0.156716 
 -0.959184 -0.961035 0.134328 
 -0.956633 -0.961035 0.104478 
 -0.955357 -0.961035 0.089552 
 -0.954082 -0.961035 0.070896 
 -0.952806 -0.961035 0.052239 
 -0.965561 -0.960454 0.145522 
 -0.964286 -0.960454 0.145522 
 -0.963010 -0.960454 0.141791 
 -0.961735 -0.960454 0.134328 
 -0.959184 -0.960454 0.111940 
 -0.956633 -0.960454 0.089552 
 -0.955357 -0.960454 0.078358 
 -0.954082 -0.960454 0.067164 
 -0.952806 -0.960454 0.055970 
 -0.965561 -0.959872 0.134328 
 -0.964286 -0.959872 0.134328 
 -0.963010 -0.959872 0.126866 
 -0.961735 -0.959872 0.115672 
 -0.959184 -0.959872 0.085821 
 -0.956633 -0.959872 0.070896 
 -0.955357 -0.959872 0.055970 
 -0.954082 -0.959872 0.044776 
 -0.952806 -0.959872 0.037313 
 -0.964286 -0.959872 0.134328 
 -0.963010 -0.959872 0.126866 
 -0.961735 -0.959872 0.115672 
 -0.960459 -0.959872 0.100746 
 -0.957908 -0.959872 0.078358 
 -0.955357 -0.959872 0.055970 
 -0.954082 -0.959872 0.044776 
 -0.952806 -0.959872 0.037313 
 -0.951531 -0.959872 0.029851 
 -0.964286 -0.959290 0.123134 
 -0.963010 -0.959290 0.104478 
 -0.961735 -0.959290 0.078358 
 -0.960459 -0.959290 0.055970 
 -0.957908 -0.959290 0.029851 
 -0.955357 -0.959290 0.014925 
 -0.954082 -0.959290 0.011194 
 -0.952806 -0.959290 0.007463 
 -0.951531 -0.959290 0.007463 
 -0.964286 -0.958709 0.123134 
 -0.963010 -0.958709 0.108209 
 -0.961735 -0.958709 0.082090 
 -0.960459 -0.958709 0.055970 
 -0.957908 -0.958709 0.011194 
 -0.955357 -0.958709 -0.007463 
 -0.954082 -0.958709 -0.007463 
 -0.952806 -0.958709 -0.007463 
 -0.951531 -0.958709 -0.011194 
 -0.963010 -0.958709 0.108209 
 -0.961735 -0.958709 0.082090 
 -0.960459 -0.958709 0.055970 
 -0.959184 -0.958709 0.033582 
 -0.956633 -0.958709 0.000000 
 -0.954082 -0.958709 -0.007463 
 -0.952806 -0.958709 -0.007463 
 -0.951531 -0.958709 -0.011194 
 -0.950255 -0.958709 -0.014925 
 -0.963010 -0.958127 0.123134 
 -0.961735 -0.958127 0.108209 
 -0.960459 -0.958127 0.089552 
 -0.959184 -0.958127 0.059701 
 -0.956633 -0.958127 0.011194 
 -0.954082 -0.958127 -0.041045 
 -0.952806 -0.958127 -0.055970 
 -0.951531 -0.958127 -0.067164 
 -0.950255 -0.958127 -0.067164 
 -0.963010 -0.957546 0.130597 
 -0.961735 -0.957546 0.123134 
 -0.960459 -0.957546 0.100746 
 -0.959184 -0.957546 0.082090 
 -0.956633 -0.957546 0.029851 
 -0.954082 -0.957546 -0.026119 
 -0.952806 -0.957546 -0.048507 
 -0.951531 -0.957546 -0.067164 
 -0.950255 -0.957546 -0.097015 
 -0.963010 -0.956964 0.123134 
 -0.961735 -0.956964 0.123134 
 -0.960459 -0.956964 0.111940 
 -0.959184 -0.956964 0.100746 
 -0.956633 -0.956964 0.055970 
 -0.954082 -0.956964 0.000000 
 -0.952806 -0.956964 -0.029851 
 -0.951531 -0.956964 -0.055970 
 -0.950255 -0.956964 -0.078358 
 -0.961735 -0.956964 0.123134 
 -0.960459 -0.956964 0.111940 
 -0.959184 -0.956964 0.100746 
 -0.957908 -0.956964 0.078358 
 -0.955357 -0.956964 0.026119 
 -0.952806 -0.956964 -0.029851 
 -0.951531 -0.956964 -0.055970 
 -0.950255 -0.956964 -0.078358 
 -0.948980 -0.956964 -0.097015 
 -0.961735 -0.956383 0.115672 
 -0.960459 -0.956383 0.111940 
 -0.959184 -0.956383 0.104478 
 -0.957908 -0.956383 0.085821 
 -0.955357 -0.956383 0.041045 
 -0.952806 -0.956383 -0.018657 
 -0.951531 -0.956383 -0.048507 
 -0.950255 -0.956383 -0.067164 
 -0.948980 -0.956383 -0.082090 
 -0.961735 -0.955801 0.100746 
 -0.960459 -0.955801 0.100746 
 -0.959184 -0.955801 0.100746 
 -0.957908 -0.955801 0.089552 
 -0.955357 -0.955801 0.055970 
 -0.952806 -0.955801 0.000000 
 -0.951531 -0.955801 -0.018657 
 -0.950255 -0.955801 -0.048507 
 -0.948980 -0.955801 -0.063433 
 -0.961735 -0.955220 0.089552 
 -0.960459 -0.955220 0.093284 
 -0.959184 -0.955220 0.097015 
 -0.957908 -0.955220 0.089552 
 -0.955357 -0.955220 0.067164 
 -0.952806 -0.955220 0.014925 
 -0.951531 -0.955220 -0.003731 
 -0.950255 -0.955220 -0.022388 
 -0.948980 -0.955220 -0.048507 
 -0.960459 -0.955220 0.093284 
 -0.959184 -0.955220 0.097015 
 -0.957908 -0.955220 0.089552 
 -0.956633 -0.955220 0.082090 
 -0.954082 -0.955220 0.041045 
 -0.951531 -0.955220 -0.003731 
 -0.950255 -0.955220 -0.022388 
 -0.948980 -0.955220 -0.048507 
 -0.947704 -0.955220 -0.067164 
 -0.960459 -0.954638 0.089552 
 -0.959184 -0.954638 0.097015 
 -0.957908 -0.954638 0.100746 
 -0.956633 -0.954638 0.089552 
 -0.954082 -0.954638 0.055970 
 -0.951531 -0.954638 0.014925 
 -0.950255 -0.954638 -0.007463 
 -0.948980 -0.954638 -0.026119 
 -0.947704 -0.954638 -0.055970 
 -0.960459 -0.954056 0.089552 
 -0.959184 -0.954056 0.097015 
 -0.957908 -0.954056 0.104478 
 -0.956633 -0.954056 0.097015 
 -0.954082 -0.954056 0.055970 
 -0.951531 -0.954056 0.014925 
 -0.950255 -0.954056 -0.007463 
 -0.948980 -0.954056 -0.026119 
 -0.947704 -0.954056 -0.055970 
 -0.960459 -0.953475 0.085821 
 -0.959184 -0.953475 0.097015 
 -0.957908 -0.953475 0.104478 
 -0.956633 -0.953475 0.097015 
 -0.954082 -0.953475 0.048507 
 -0.951531 -0.953475 0.011194 
 -0.950255 -0.953475 -0.011194 
 -0.948980 -0.953475 -0.033582 
 -0.947704 -0.953475 -0.055970 
 -0.959184 -0.953475 0.097015 
 -0.957908 -0.953475 0.104478 
 -0.956633 -0.953475 0.097015 
 -0.955357 -0.953475 0.070896 
 -0.952806 -0.953475 0.029851 
 -0.950255 -0.953475 -0.011194 
 -0.948980 -0.953475 -0.033582 
 -0.947704 -0.953475 -0.055970 
 -0.946429 -0.953475 -0.078358 
 -0.959184 -0.952893 0.089552 
 -0.957908 -0.952893 0.093284 
 -0.956633 -0.952893 0.089552 
 -0.955357 -0.952893 0.063433 
 -0.952806 -0.952893 0.026119 
 -0.950255 -0.952893 -0.014925 
 -0.948980 -0.952893 -0.037313 
 -0.947704 -0.952893 -0.059701 
 -0.946429 -0.952893 -0.082090 
 -0.959184 -0.952312 0.085821 
 -0.957908 -0.952312 0.085821 
 -0.956633 -0.952312 0.085821 
 -0.955357 -0.952312 0.063433 
 -0.952806 -0.952312 0.022388 
 -0.950255 -0.952312 -0.018657 
 -0.948980 -0.952312 -0.041045 
 -0.947704 -0.952312 -0.059701 
 -0.946429 -0.952312 -0.089552 
 -0.959184 -0.951730 0.078358 
 -0.957908 -0.951730 0.085821 
 -0.956633 -0.951730 0.085821 
 -0.955357 -0.951730 0.063433 
 -0.952806 -0.951730 0.022388 
 -0.950255 -0.951730 -0.014925 
 -0.948980 -0.951730 -0.037313 
 -0.947704 -0.951730 -0.059701 
 -0.946429 -0.951730 -0.082090 
 -0.957908 -0.951730 0.085821 
 -0.956633 -0.951730 0.085821 
 -0.955357 -0.951730 0.063433 
 -0.954082 -0.951730 0.044776 
 -0.951531 -0.951730 0.003731 
 -0.948980 -0.951730 -0.037313 
 -0.947704 -0.951730 -0.059701 
 -0.946429 -0.951730 -0.082090 
 -0.945153 -0.951730 -0.085821 
 -0.957908 -0.951149 0.085821 
 -0.956633 -0.951149 0.085821 
 -0.955357 -0.951149 0.067164 
 -0.954082 -0.951149 0.048507 
 -0.951531 -0.951149 0.007463 
 -0.948980 -0.951149 -0.029851 
 -0.947704 -0.951149 -0.055970 
 -0.946429 -0.951149 -0.067164 
 -0.945153 -0.951149 -0.074627 
 -0.957908 -0.950567 0.078358 
 -0.956633 -0.950567 0.085821 
 -0.955357 -0.950567 0.078358 
 -0.954082 -0.950567 0.055970 
 -0.951531 -0.950567 0.018657 
 -0.948980 -0.950567 -0.014925 
 -0.947704 -0.950567 -0.029851 
 -0.946429 -0.950567 -0.044776 
 -0.945153 -0.950567 -0.041045 
 -0.957908 -0.949985 0.070896 
 -0.956633 -0.949985 0.085821 
 -0.955357 -0.949985 0.085821 
 -0.954082 -0.949985 0.063433 
 -0.951531 -0.949985 0.029851 
 -0.948980 -0.949985 0.000000 
 -0.947704 -0.949985 -0.011194 
 -0.946429 -0.949985 -0.022388 
 -0.945153 -0.949985 -0.018657 
 -0.956633 -0.949985 0.085821 
 -0.955357 -0.949985 0.085821 
 -0.954082 -0.949985 0.063433 
 -0.952806 -0.949985 0.044776 
 -0.950255 -0.949985 0.011194 
 -0.947704 -0.949985 -0.011194 
 -0.946429 -0.949985 -0.022388 
 -0.945153 -0.949985 -0.018657 
 -0.943878 -0.949985 -0.011194 
 -0.956633 -0.949404 0.078358 
 -0.955357 -0.949404 0.085821 
 -0.954082 -0.949404 0.074627 
 -0.952806 -0.949404 0.059701 
 -0.950255 -0.949404 0.033582 
 -0.947704 -0.949404 0.018657 
 -0.946429 -0.949404 0.018657 
 -0.945153 -0.949404 0.022388 
 -0.943878 -0.949404 0.022388 
 -0.956633 -0.948822 0.074627 
 -0.955357 -0.948822 0.078358 
 -0.954082 -0.948822 0.070896 
 -0.952806 -0.948822 0.067164 
 -0.950255 -0.948822 0.044776 
 -0.947704 -0.948822 0.037313 
 -0.946429 -0.948822 0.037313 
 -0.945153 -0.948822 0.037313 
 -0.943878 -0.948822 0.041045 
 -0.956633 -0.948241 0.055970 
 -0.955357 -0.948241 0.055970 
 -0.954082 -0.948241 0.055970 
 -0.952806 -0.948241 0.048507 
 -0.950255 -0.948241 0.037313 
 -0.947704 -0.948241 0.033582 
 -0.946429 -0.948241 0.037313 
 -0.945153 -0.948241 0.041045 
 -0.943878 -0.948241 0.048507 
 -0.955357 -0.948241 0.055970 
 -0.954082 -0.948241 0.055970 
 -0.952806 -0.948241 0.048507 
 -0.951531 -0.948241 0.041045 
 -0.948980 -0.948241 0.033582 
 -0.946429 -0.948241 0.037313 
 -0.945153 -0.948241 0.041045 
 -0.943878 -0.948241 0.048507 
 -0.942602 -0.948241 0.044776 
 -0.955357 -0.947659 0.041045 
 -0.954082 -0.947659 0.037313 
 -0.952806 -0.947659 0.029851 
 -0.951531 -0.947659 0.026119 
 -0.948980 -0.947659 0.018657 
 -0.946429 -0.947659 0.026119 
 -0.945153 -0.947659 0.029851 
 -0.943878 -0.947659 0.029851 
 -0.942602 -0.947659 0.033582 
 -0.955357 -0.947078 0.018657 
 -0.954082 -0.947078 0.003731 
 -0.952806 -0.947078 0.000000 
 -0.951531 -0.947078 -0.003731 
 -0.948980 -0.947078 -0.003731 
 -0.946429 -0.947078 -0.003731 
 -0.945153 -0.947078 -0.003731 
 -0.943878 -0.947078 0.000000 
 -0.942602 -0.947078 0.003731 
 -0.955357 -0.946496 0.003731 
 -0.954082 -0.946496 -0.011194 
 -0.952806 -0.946496 -0.018657 
 -0.951531 -0.946496 -0.026119 
 -0.948980 -0.946496 -0.033582 
 -0.946429 -0.946496 -0.029851 
 -0.945153 -0.946496 -0.026119 
 -0.943878 -0.946496 -0.026119 
 -0.942602 -0.946496 -0.022388 
 -0.954082 -0.946496 -0.011194 
 -0.952806 -0.946496 -0.018657 
 -0.951531 -0.946496 -0.026119 
 -0.950255 -0.946496 -0.033582 
 -0.947704 -0.946496 -0.033582 
 -0.945153 -0.946496 -0.026119 
 -0.943878 -0.946496 -0.026119 
 -0.942602 -0.946496 -0.022388 
 -0.941327 -0.946496 -0.018657 
 -0.954082 -0.945915 -0.014925 
 -0.952806 -0.945915 -0.037313 
 -0.951531 -0.945915 -0.055970 
 -0.950255 -0.945915 -0.074627 
 -0.947704 -0.945915 -0.082090 
 -0.945153 -0.945915 -0.078358 
 -0.943878 -0.945915 -0.070896 
 -0.942602 -0.945915 -0.067164 
 -0.941327 -0.945915 -0.067164 
 -0.954082 -0.945333 -0.011194 
 -0.952806 -0.945333 -0.037313 
 -0.951531 -0.945333 -0.059701 
 -0.950255 -0.945333 -0.078358 
 -0.947704 -0.945333 -0.104478 
 -0.945153 -0.945333 -0.097015 
 -0.943878 -0.945333 -0.089552 
 -0.942602 -0.945333 -0.085821 
 -0.941327 -0.945333 -0.082090 
 -0.952806 -0.944751 -0.029851 
 -0.951531 -0.944751 -0.055970 
 -0.950255 -0.944751 -0.078358 
 -0.948980 -0.944751 -0.097015 
 -0.946429 -0.944751 -0.130597 
 -0.943878 -0.944751 -0.134328 
 -0.942602 -0.944751 -0.130597 
 -0.941327 -0.944751 -0.123134 
 -0.940051 -0.944751 -0.115672 
 -0.952806 -0.944170 -0.018657 
 -0.951531 -0.944170 -0.044776 
 -0.950255 -0.944170 -0.070896 
 -0.948980 -0.944170 -0.089552 
 -0.946429 -0.944170 -0.130597 
 -0.943878 -0.944170 -0.156716 
 -0.942602 -0.944170 -0.160448 
 -0.941327 -0.944170 -0.156716 
 -0.940051 -0.944170 -0.152985 
 -0.952806 -0.943588 -0.007463 
 -0.951531 -0.943588 -0.033582 
 -0.950255 -0.943588 -0.059701 
 -0.948980 -0.943588 -0.082090 
 -0.946429 -0.943588 -0.123134 
 -0.943878 -0.943588 -0.152985 
 -0.942602 -0.943588 -0.167910 
 -0.941327 -0.943588 -0.186567 
 -0.940051 -0.943588 -0.182836 
 -0.951531 -0.943588 -0.033582 
 -0.950255 -0.943588 -0.059701 
 -0.948980 -0.943588 -0.082090 
 -0.947704 -0.943588 -0.100746 
 -0.945153 -0.943588 -0.134328 
 -0.942602 -0.943588 -0.167910 
 -0.941327 -0.943588 -0.186567 
 -0.940051 -0.943588 -0.182836 
 -0.938776 -0.943588 -0.179104 
 -0.951531 -0.943007 -0.018657 
 -0.950255 -0.943007 -0.041045 
 -0.948980 -0.943007 -0.063433 
 -0.947704 -0.943007 -0.082090 
 -0.945153 -0.943007 -0.115672 
 -0.942602 -0.943007 -0.145522 
 -0.941327 -0.943007 -0.167910 
 -0.940051 -0.943007 -0.186567 
 -0.938776 -0.943007 -0.208955 
 -0.951531 -0.942425 -0.014925 
 -0.950255 -0.942425 -0.033582 
 -0.948980 -0.942425 -0.052239 
 -0.947704 -0.942425 -0.063433 
 -0.945153 -0.942425 -0.097015 
 -0.942602 -0.942425 -0.126866 
 -0.941327 -0.942425 -0.138060 
 -0.940051 -0.942425 -0.156716 
 -0.938776 -0.942425 -0.190299 
 -0.951531 -0.941844 0.011194 
 -0.950255 -0.941844 -0.011194 
 -0.948980 -0.941844 -0.018657 
 -0.947704 -0.941844 -0.033582 
 -0.945153 -0.941844 -0.067164 
 -0.942602 -0.941844 -0.100746 
 -0.941327 -0.941844 -0.119403 
 -0.940051 -0.941844 -0.130597 
 -0.938776 -0.941844 -0.145522 
 -0.950255 -0.941844 -0.011194 
 -0.948980 -0.941844 -0.018657 
 -0.947704 -0.941844 -0.033582 
 -0.946429 -0.941844 -0.052239 
 -0.943878 -0.941844 -0.085821 
 -0.941327 -0.941844 -0.119403 
 -0.940051 -0.941844 -0.130597 
 -0.938776 -0.941844 -0.145522 
 -0.937500 -0.941844 -0.156716 
 -0.950255 -0.941262 0.011194 
 -0.948980 -0.941262 0.000000 
 -0.947704 -0.941262 -0.014925 
 -0.946429 -0.941262 -0.033582 
 -0.943878 -0.941262 -0.067164 
 -0.941327 -0.941262 -0.104478 
 -0.940051 -0.941262 -0.123134 
 -0.938776 -0.941262 -0.138060 
 -0.937500 -0.941262 -0.152985 
 -0.950255 -0.940680 0.011194 
 -0.948980 -0.940680 0.003731 
 -0.947704 -0.940680 -0.007463 
 -0.946429 -0.940680 -0.014925 
 -0.943878 -0.940680 -0.048507 
 -0.941327 -0.940680 -0.089552 
 -0.940051 -0.940680 -0.111940 
 -0.938776 -0.940680 -0.134328 
 -0.937500 -0.940680 -0.156716 
 -0.950255 -0.940099 -0.007463 
 -0.948980 -0.940099 -0.011194 
 -0.947704 -0.940099 -0.014925 
 -0.946429 -0.940099 -0.018657 
 -0.943878 -0.940099 -0.041045 
 -0.941327 -0.940099 -0.089552 
 -0.940051 -0.940099 -0.111940 
 -0.938776 -0.940099 -0.138060 
 -0.937500 -0.940099 -0.164179 
 -0.948980 -0.940099 -0.011194 
 -0.947704 -0.940099 -0.014925 
 -0.946429 -0.940099 -0.018657 
 -0.945153 -0.940099 -0.026119 
 -0.942602 -0.940099 -0.063433 
 -0.940051 -0.940099 -0.111940 
 -0.938776 -0.940099 -0.138060 
 -0.937500 -0.940099 -0.164179 
 -0.936224 -0.940099 -0.190299 
 -0.948980 -0.939517 -0.044776 
 -0.947704 -0.939517 -0.044776 
 -0.946429 -0.939517 -0.044776 
 -0.945153 -0.939517 -0.044776 
 -0.942602 -0.939517 -0.070896 
 -0.940051 -0.939517 -0.115672 
 -0.938776 -0.939517 -0.145522 
 -0.937500 -0.939517 -0.175373 
 -0.936224 -0.939517 -0.208955 
 -0.948980 -0.938936 -0.067164 
 -0.947704 -0.938936 -0.067164 
 -0.946429 -0.938936 -0.067164 
 -0.945153 -0.938936 -0.063433 
 -0.942602 -0.938936 -0.082090 
 -0.940051 -0.938936 -0.119403 
 -0.938776 -0.938936 -0.160448 
 -0.937500 -0.938936 -0.190299 
 -0.936224 -0.938936 -0.220149 
 -0.948980 -0.938354 -0.100746 
 -0.947704 -0.938354 -0.100746 
 -0.946429 -0.938354 -0.097015 
 -0.945153 -0.938354 -0.093284 
 -0.942602 -0.938354 -0.100746 
 -0.940051 -0.938354 -0.145522 
 -0.938776 -0.938354 -0.182836 
 -0.937500 -0.938354 -0.212687 
 -0.936224 -0.938354 -0.242537 
 -0.947704 -0.938354 -0.100746 
 -0.946429 -0.938354 -0.097015 
 -0.945153 -0.938354 -0.093284 
 -0.943878 -0.938354 -0.093284 
 -0.941327 -0.938354 -0.115672 
 -0.938776 -0.938354 -0.182836 
 -0.937500 -0.938354 -0.212687 
 -0.936224 -0.938354 -0.242537 
 -0.934949 -0.938354 -0.257463 
 -0.947704 -0.937773 -0.123134 
 -0.946429 -0.937773 -0.119403 
 -0.945153 -0.937773 -0.115672 
 -0.943878 -0.937773 -0.111940 
 -0.941327 -0.937773 -0.134328 
 -0.938776 -0.937773 -0.197761 
 -0.937500 -0.937773 -0.227612 
 -0.936224 -0.937773 -0.253731 
 -0.934949 -0.937773 -0.264925 
 -0.947704 -0.937191 -0.145522 
 -0.946429 -0.937191 -0.141791 
 -0.945153 -0.937191 -0.141791 
 -0.943878 -0.937191 -0.141791 
 -0.941327 -0.937191 -0.164179 
 -0.938776 -0.937191 -0.220149 
 -0.937500 -0.937191 -0.250000 
 -0.936224 -0.937191 -0.261194 
 -0.934949 -0.937191 -0.272388 
 -0.947704 -0.936609 -0.160448 
 -0.946429 -0.936609 -0.156716 
 -0.945153 -0.936609 -0.156716 
 -0.943878 -0.936609 -0.160448 
 -0.941327 -0.936609 -0.182836 
 -0.938776 -0.936609 -0.242537 
 -0.937500 -0.936609 -0.257463 
 -0.936224 -0.936609 -0.264925 
 -0.934949 -0.936609 -0.272388 
 -0.946429 -0.936609 -0.156716 
 -0.945153 -0.936609 -0.156716 
 -0.943878 -0.936609 -0.160448 
 -0.942602 -0.936609 -0.167910 
 -0.940051 -0.936609 -0.201493 
 -0.937500 -0.936609 -0.257463 
 -0.936224 -0.936609 -0.264925 
 -0.934949 -0.936609 -0.272388 
 -0.933673 -0.936609 -0.276119 
 -0.946429 -0.936028 -0.179104 
 -0.945153 -0.936028 -0.182836 
 -0.943878 -0.936028 -0.190299 
 -0.942602 -0.936028 -0.201493 
 -0.940051 -0.936028 -0.246269 
 -0.937500 -0.936028 -0.272388 
 -0.936224 -0.936028 -0.272388 
 -0.934949 -0.936028 -0.276119 
 -0.933673 -0.936028 -0.279851 
 -0.946429 -0.935446 -0.197761 
 -0.945153 -0.935446 -0.201493 
 -0.943878 -0.935446 -0.208955 
 -0.942602 -0.935446 -0.220149 
 -0.940051 -0.935446 -0.261194 
 -0.937500 -0.935446 -0.276119 
 -0.936224 -0.935446 -0.279851 
 -0.934949 -0.935446 -0.283582 
 -0.933673 -0.935446 -0.283582 
 -0.945153 -0.935446 -0.201493 
 -0.943878 -0.935446 -0.208955 
 -0.942602 -0.935446 -0.220149 
 -0.941327 -0.935446 -0.242537 
 -0.938776 -0.935446 -0.272388 
 -0.936224 -0.935446 -0.279851 
 -0.934949 -0.935446 -0.283582 
 -0.933673 -0.935446 -0.283582 
 -0.932398 -0.935446 -0.287313 
 -0.945153 -0.934865 -0.220149 
 -0.943878 -0.934865 -0.231343 
 -0.942602 -0.934865 -0.250000 
 -0.941327 -0.934865 -0.264925 
 -0.938776 -0.934865 -0.276119 
 -0.936224 -0.934865 -0.287313 
 -0.934949 -0.934865 -0.287313 
 -0.933673 -0.934865 -0.287313 
 -0.932398 -0.934865 -0.287313 
 -0.945153 -0.934283 -0.253731 
 -0.943878 -0.934283 -0.268657 
 -0.942602 -0.934283 -0.276119 
 -0.941327 -0.934283 -0.283582 
 -0.938776 -0.934283 -0.287313 
 -0.936224 -0.934283 -0.287313 
 -0.934949 -0.934283 -0.287313 
 -0.933673 -0.934283 -0.287313 
 -0.932398 -0.934283 -0.287313 
 -0.945153 -0.933702 -0.272388 
 -0.943878 -0.933702 -0.276119 
 -0.942602 -0.933702 -0.283582 
 -0.941327 -0.933702 -0.287313 
 -0.938776 -0.933702 -0.287313 
 -0.936224 -0.933702 -0.287313 
 -0.934949 -0.933702 -0.287313 
 -0.933673 -0.933702 -0.287313 
 -0.932398 -0.933702 -0.287313 
 -0.943878 -0.933702 -0.276119 
 -0.942602 -0.933702 -0.283582 
 -0.941327 -0.933702 -0.287313 
 -0.940051 -0.933702 -0.287313 
 -0.937500 -0.933702 -0.287313 
 -0.934949 -0.933702 -0.287313 
 -0.933673 -0.933702 -0.287313 
 -0.932398 -0.933702 -0.287313 
 -0.931122 -0.933702 -0.287313 
 -0.943878 -0.933120 -0.287313 
 -0.942602 -0.933120 -0.287313 
 -0.941327 -0.933120 -0.287313 
 -0.940051 -0.933120 -0.287313 
 -0.937500 -0.933120 -0.287313 
 -0.934949 -0.933120 -0.291045 
 -0.933673 -0.933120 -0.291045 
 -0.932398 -0.933120 -0.291045 
 -0.931122 -0.933120 -0.291045 
 -0.943878 -0.932539 -0.287313 
 -0.942602 -0.932539 -0.287313 
 -0.941327 -0.932539 -0.287313 
 -0.940051 -0.932539 -0.287313 
 -0.937500 -0.932539 -0.291045 
 -0.934949 -0.932539 -0.291045 
 -0.933673 -0.932539 -0.291045 
 -0.932398 -0.932539 -0.291045 
 -0.931122 -0.932539 -0.291045 
 -0.943878 -0.931957 -0.287313 
 -0.942602 -0.931957 -0.287313 
 -0.941327 -0.931957 -0.287313 
 -0.940051 -0.931957 -0.291045 
 -0.937500 -0.931957 -0.291045 
 -0.934949 -0.931957 -0.291045 
 -0.933673 -0.931957 -0.291045 
 -0.932398 -0.931957 -0.291045 
 -0.931122 -0.931957 -0.291045 
 -0.942602 -0.931957 -0.287313 
 -0.941327 -0.931957 -0.287313 
 -0.940051 -0.931957 -0.291045 
 -0.938776 -0.931957 -0.291045 
 -0.936224 -0.931957 -0.291045 
 -0.933673 -0.931957 -0.291045 
 -0.932398 -0.931957 -0.291045 
 -0.931122 -0.931957 -0.291045 
 -0.929847 -0.931957 -0.291045 
 -0.942602 -0.931375 -0.291045 
 -0.941327 -0.931375 -0.291045 
 -0.940051 -0.931375 -0.291045 
 -0.938776 -0.931375 -0.291045 
 -0.936224 -0.931375 -0.291045 
 -0.933673 -0.931375 -0.291045 
 -0.932398 -0.931375 -0.291045 
 -0.931122 -0.931375 -0.291045 
 -0.929847 -0.931375 -0.291045 
 -0.942602 -0.930794 -0.291045 
 -0.941327 -0.930794 -0.291045 
 -0.940051 -0.930794 -0.294776 
 -0.938776 -0.930794 -0.291045 
 -0.936224 -0.930794 -0.291045 
 -0.933673 -0.930794 -0.291045 
 -0.932398 -0.930794 -0.291045 
 -0.931122 -0.930794 -0.291045 
 -0.929847 -0.930794 -0.291045 
 -0.942602 -0.930212 -0.294776 
 -0.941327 -0.930212 -0.294776 
 -0.940051 -0.930212 -0.294776 
 -0.938776 -0.930212 -0.294776 
 -0.936224 -0.930212 -0.294776 
 -0.933673 -0.930212 -0.291045 
 -0.932398 -0.930212 -0.291045 
 -0.931122 -0.930212 -0.291045 
 -0.929847 -0.930212 -0.291045 
 -0.941327 -0.930212 -0.294776 
 -0.940051 -0.930212 -0.294776 
 -0.938776 -0.930212 -0.294776 
 -0.937500 -0.930212 -0.294776 
 -0.934949 -0.930212 -0.291045 
 -0.932398 -0.930212 -0.291045 
 -0.931122 -0.930212 -0.291045 
 -0.929847 -0.930212 -0.291045 
 -0.928571 -0.930212 -0.279851 
 -0.941327 -0.929631 -0.298507 
 -0.940051 -0.929631 -0.298507 
 -0.938776 -0.929631 -0.298507 
 -0.937500 -0.929631 -0.298507 
 -0.934949 -0.929631 -0.294776 
 -0.932398 -0.929631 -0.294776 
 -0.931122 -0.929631 -0.291045 
 -0.929847 -0.929631 -0.287313 
 -0.928571 -0.929631 -0.276119 
 -0.941327 -0.929049 -0.298507 
 -0.940051 -0.929049 -0.298507 
 -0.938776 -0.929049 -0.298507 
 -0.937500 -0.929049 -0.298507 
 -0.934949 -0.929049 -0.298507 
 -0.932398 -0.929049 -0.294776 
 -0.931122 -0.929049 -0.291045 
 -0.929847 -0.929049 -0.287313 
 -0.928571 -0.929049 -0.276119 
 -0.940051 -0.929049 -0.298507 
 -0.938776 -0.929049 -0.298507 
 -0.937500 -0.929049 -0.298507 
 -0.936224 -0.929049 -0.298507 
 -0.933673 -0.929049 -0.294776 
 -0.931122 -0.929049 -0.291045 
 -0.929847 -0.929049 -0.287313 
 -0.928571 -0.929049 -0.276119 
 -0.927296 -0.929049 -0.261194 
 -0.940051 -0.928468 -0.302239 
 -0.938776 -0.928468 -0.302239 
 -0.937500 -0.928468 -0.302239 
 -0.936224 -0.928468 -0.298507 
 -0.933673 -0.928468 -0.294776 
 -0.931122 -0.928468 -0.291045 
 -0.929847 -0.928468 -0.287313 
 -0.928571 -0.928468 -0.276119 
 -0.927296 -0.928468 -0.264925 
 -0.940051 -0.927886 -0.305970 
 -0.938776 -0.927886 -0.302239 
 -0.937500 -0.927886 -0.302239 
 -0.936224 -0.927886 -0.298507 
 -0.933673 -0.927886 -0.294776 
 -0.931122 -0.927886 -0.291045 
 -0.929847 -0.927886 -0.287313 
 -0.928571 -0.927886 -0.279851 
 -0.927296 -0.927886 -0.272388 
 -0.940051 -0.927304 -0.305970 
 -0.938776 -0.927304 -0.305970 
 -0.937500 -0.927304 -0.305970 
 -0.936224 -0.927304 -0.302239 
 -0.933673 -0.927304 -0.294776 
 -0.931122 -0.927304 -0.291045 
 -0.929847 -0.927304 -0.291045 
 -0.928571 -0.927304 -0.291045 
 -0.927296 -0.927304 -0.283582 
 -0.938776 -0.927304 -0.305970 
 -0.937500 -0.927304 -0.305970 
 -0.936224 -0.927304 -0.302239 
 -0.934949 -0.927304 -0.298507 
 -0.932398 -0.927304 -0.294776 
 -0.929847 -0.927304 -0.291045 
 -0.928571 -0.927304 -0.291045 
 -0.927296 -0.927304 -0.283582 
 -0.926020 -0.927304 -0.276119 
 -0.938776 -0.926723 -0.305970 
 -0.937500 -0.926723 -0.305970 
 -0.936224 -0.926723 -0.302239 
 -0.934949 -0.926723 -0.298507 
 -0.932398 -0.926723 -0.294776 
 -0.929847 -0.926723 -0.291045 
 -0.928571 -0.926723 -0.291045 
 -0.927296 -0.926723 -0.291045 
 -0.926020 -0.926723 -0.287313 
 -0.938776 -0.926141 -0.305970 
 -0.937500 -0.926141 -0.305970 
 -0.936224 -0.926141 -0.305970 
 -0.934949 -0.926141 -0.302239 
 -0.932398 -0.926141 -0.294776 
 -0.929847 -0.926141 -0.294776 
 -0.928571 -0.926141 -0.294776 
 -0.927296 -0.926141 -0.294776 
 -0.926020 -0.926141 -0.291045 
 -0.938776 -0.925560 -0.305970 
 -0.937500 -0.925560 -0.305970 
 -0.936224 -0.925560 -0.305970 
 -0.934949 -0.925560 -0.305970 
 -0.932398 -0.925560 -0.302239 
 -0.929847 -0.925560 -0.302239 
 -0.928571 -0.925560 -0.302239 
 -0.927296 -0.925560 -0.298507 
 -0.926020 -0.925560 -0.298507 
 -0.937500 -0.925560 -0.305970 
 -0.936224 -0.925560 -0.305970 
 -0.934949 -0.925560 -0.305970 
 -0.933673 -0.925560 -0.298507 
 -0.931122 -0.925560 -0.302239 
 -0.928571 -0.925560 -0.302239 
 -0.927296 -0.925560 -0.298507 
 -0.926020 -0.925560 -0.298507 
 -0.924745 -0.925560 -0.294776 
 -0.937500 -0.924978 -0.305970 
 -0.936224 -0.924978 -0.305970 
 -0.934949 -0.924978 -0.305970 
 -0.933673 -0.924978 -0.305970 
 -0.931122 -0.924978 -0.305970 
 -0.928571 -0.924978 -0.302239 
 -0.927296 -0.924978 -0.302239 
 -0.926020 -0.924978 -0.298507 
 -0.924745 -0.924978 -0.298507 
 -0.937500 -0.924397 -0.305970 
 -0.936224 -0.924397 -0.305970 
 -0.934949 -0.924397 -0.305970 
 -0.933673 -0.924397 -0.305970 
 -0.931122 -0.924397 -0.305970 
 -0.928571 -0.924397 -0.305970 
 -0.927296 -0.924397 -0.305970 
 -0.926020 -0.924397 -0.305970 
 -0.924745 -0.924397 -0.302239 
 -0.936224 -0.924397 -0.305970 
 -0.934949 -0.924397 -0.305970 
 -0.933673 -0.924397 -0.305970 
 -0.932398 -0.924397 -0.305970 
 -0.929847 -0.924397 -0.305970 
 -0.927296 -0.924397 -0.305970 
 -0.926020 -0.924397 -0.305970 
 -0.924745 -0.924397 -0.302239 
 -0.923469 -0.924397 -0.302239 
 -0.936224 -0.923815 -0.305970 
 -0.934949 -0.923815 -0.305970 
 -0.933673 -0.923815 -0.305970 
 -0.932398 -0.923815 -0.305970 
 -0.929847 -0.923815 -0.305970 
 -0.927296 -0.923815 -0.305970 
 -0.926020 -0.923815 -0.305970 
 -0.924745 -0.923815 -0.305970 
 -0.923469 -0.923815 -0.302239 
 -0.936224 -0.923233 -0.305970 
 -0.934949 -0.923233 -0.305970 
 -0.933673 -0.923233 -0.305970 
 -0.932398 -0.923233 -0.305970 
 -0.929847 -0.923233 -0.305970 
 -0.927296 -0.923233 -0.305970 
 -0.926020 -0.923233 -0.305970 
 -0.924745 -0.923233 -0.305970 
 -0.923469 -0.923233 -0.302239 
 -0.936224 -0.922652 -0.305970 
 -0.934949 -0.922652 -0.305970 
 -0.933673 -0.922652 -0.305970 
 -0.932398 -0.922652 -0.305970 
 -0.929847 -0.922652 -0.305970 
 -0.927296 -0.922652 -0.305970 
 -0.926020 -0.922652 -0.305970 
 -0.924745 -0.922652 -0.302239 
 -0.923469 -0.922652 -0.302239 
 -0.934949 -0.922652 -0.305970 
 -0.933673 -0.922652 -0.305970 
 -0.932398 -0.922652 -0.305970 
 -0.931122 -0.922652 -0.305970 
 -0.928571 -0.922652 -0.305970 
 -0.926020 -0.922652 -0.305970 
 -0.924745 -0.922652 -0.302239 
 -0.923469 -0.922652 -0.302239 
 -0.922194 -0.922652 -0.298507 
 -0.934949 -0.922070 -0.305970 
 -0.933673 -0.922070 -0.305970 
 -0.932398 -0.922070 -0.305970 
 -0.931122 -0.922070 -0.305970 
 -0.928571 -0.922070 -0.305970 
 -0.926020 -0.922070 -0.302239 
 -0.924745 -0.922070 -0.298507 
 -0.923469 -0.922070 -0.298507 
 -0.922194 -0.922070 -0.298507 
 -0.934949 -0.921489 -0.305970 
 -0.933673 -0.921489 -0.305970 
 -0.932398 -0.921489 -0.305970 
 -0.931122 -0.921489 -0.305970 
 -0.928571 -0.921489 -0.302239 
 -0.926020 -0.921489 -0.302239 
 -0.924745 -0.921489 -0.298507 
 -0.923469 -0.921489 -0.298507 
 -0.922194 -0.921489 -0.298507 
 -0.934949 -0.920907 -0.305970 
 -0.933673 -0.920907 -0.302239 
 -0.932398 -0.920907 -0.302239 
 -0.931122 -0.920907 -0.302239 
 -0.928571 -0.920907 -0.302239 
 -0.926020 -0.920907 -0.298507 
 -0.924745 -0.920907 -0.298507 
 -0.923469 -0.920907 -0.298507 
 -0.922194 -0.920907 -0.298507 
 -0.933673 -0.920907 -0.302239 
 -0.932398 -0.920907 -0.302239 
 -0.931122 -0.920907 -0.302239 
 -0.929847 -0.920907 -0.302239 
 -0.927296 -0.920907 -0.302239 
 -0.924745 -0.920907 -0.298507 
 -0.923469 -0.920907 -0.298507 
 -0.922194 -0.920907 -0.298507 
 -0.920918 -0.920907 -0.298507 
 -0.933673 -0.920326 -0.302239 
 -0.932398 -0.920326 -0.302239 
 -0.931122 -0.920326 -0.302239 
 -0.929847 -0.920326 -0.302239 
 -0.927296 -0.920326 -0.302239 
 -0.924745 -0.920326 -0.298507 
 -0.923469 -0.920326 -0.298507 
 -0.922194 -0.920326 -0.298507 
 -0.920918 -0.920326 -0.298507 
 -0.933673 -0.919744 -0.298507 
 -0.932398 -0.919744 -0.298507 
 -0.931122 -0.919744 -0.298507 
 -0.929847 -0.919744 -0.298507 
 -0.927296 -0.919744 -0.298507 
 -0.924745 -0.919744 -0.298507 
 -0.923469 -0.919744 -0.298507 
 -0.922194 -0.919744 -0.294776 
 -0.920918 -0.919744 -0.294776 
 -0.932398 -0.919744 -0.298507 
 -0.931122 -0.919744 -0.298507 
 -0.929847 -0.919744 -0.298507 
 -0.928571 -0.919744 -0.298507 
 -0.926020 -0.919744 -0.298507 
 -0.923469 -0.919744 -0.298507 
 -0.922194 -0.919744 -0.294776 
 -0.920918 -0.919744 -0.294776 
 -0.919643 -0.919744 -0.294776 
 -0.932398 -0.919163 -0.294776 
 -0.931122 -0.919163 -0.298507 
 -0.929847 -0.919163 -0.294776 
 -0.928571 -0.919163 -0.294776 
 -0.926020 -0.919163 -0.294776 
 -0.923469 -0.919163 -0.294776 
 -0.922194 -0.919163 -0.294776 
 -0.920918 -0.919163 -0.294776 
 -0.919643 -0.919163 -0.294776 
 -0.932398 -0.918581 -0.291045 
 -0.931122 -0.918581 -0.291045 
 -0.929847 -0.918581 -0.294776 
 -0.928571 -0.918581 -0.291045 
 -0.926020 -0.918581 -0.291045 
 -0.923469 -0.918581 -0.291045 
 -0.922194 -0.918581 -0.294776 
 -0.920918 -0.918581 -0.294776 
 -0.919643 -0.918581 -0.294776 
 -0.932398 -0.917999 -0.287313 
 -0.931122 -0.917999 -0.287313 
 -0.929847 -0.917999 -0.291045 
 -0.928571 -0.917999 -0.291045 
 -0.926020 -0.917999 -0.291045 
 -0.923469 -0.917999 -0.291045 
 -0.922194 -0.917999 -0.291045 
 -0.920918 -0.917999 -0.291045 
 -0.919643 -0.917999 -0.291045 
 -0.931122 -0.917999 -0.287313 
 -0.929847 -0.917999 -0.291045 
 -0.928571 -0.917999 -0.291045 
 -0.927296 -0.917999 -0.291045 
 -0.924745 -0.917999 -0.291045 
 -0.922194 -0.917999 -0.291045 
 -0.920918 -0.917999 -0.291045 
 -0.919643 -0.917999 -0.291045 
 -0.918367 -0.917999 -0.291045 
 -0.931122 -0.917418 -0.283582 
 -0.929847 -0.917418 -0.283582 
 -0.928571 -0.917418 -0.287313 
 -0.927296 -0.917418 -0.287313 
 -0.924745 -0.917418 -0.291045 
 -0.922194 -0.917418 -0.291045 
 -0.920918 -0.917418 -0.291045 
 -0.919643 -0.917418 -0.291045 
 -0.918367 -0.917418 -0.291045 
 -0.931122 -0.916836 -0.276119 
 -0.929847 -0.916836 -0.276119 
 -0.928571 -0.916836 -0.279851 
 -0.927296 -0.916836 -0.279851 
 -0.924745 -0.916836 -0.283582 
 -0.922194 -0.916836 -0.291045 
 -0.920918 -0.916836 -0.291045 
 -0.919643 -0.916836 -0.291045 
 -0.918367 -0.916836 -0.291045 
 -0.931122 -0.916255 -0.272388 
 -0.929847 -0.916255 -0.272388 
 -0.928571 -0.916255 -0.272388 
 -0.927296 -0.916255 -0.276119 
 -0.924745 -0.916255 -0.279851 
 -0.922194 -0.916255 -0.283582 
 -0.920918 -0.916255 -0.287313 
 -0.919643 -0.916255 -0.287313 
 -0.918367 -0.916255 -0.287313 
 -0.929847 -0.916255 -0.272388 
 -0.928571 -0.916255 -0.272388 
 -0.927296 -0.916255 -0.276119 
 -0.926020 -0.916255 -0.279851 
 -0.923469 -0.916255 -0.279851 
 -0.920918 -0.916255 -0.287313 
 -0.919643 -0.916255 -0.287313 
 -0.918367 -0.916255 -0.287313 
 -0.917092 -0.916255 -0.287313 
 -0.929847 -0.915673 -0.257463 
 -0.928571 -0.915673 -0.261194 
 -0.927296 -0.915673 -0.264925 
 -0.926020 -0.915673 -0.268657 
 -0.923469 -0.915673 -0.272388 
 -0.920918 -0.915673 -0.279851 
 -0.919643 -0.915673 -0.279851 
 -0.918367 -0.915673 -0.279851 
 -0.917092 -0.915673 -0.279851 
 -0.929847 -0.915092 -0.246269 
 -0.928571 -0.915092 -0.246269 
 -0.927296 -0.915092 -0.250000 
 -0.926020 -0.915092 -0.257463 
 -0.923469 -0.915092 -0.264925 
 -0.920918 -0.915092 -0.272388 
 -0.919643 -0.915092 -0.276119 
 -0.918367 -0.915092 -0.276119 
 -0.917092 -0.915092 -0.276119 
 -0.928571 -0.915092 -0.246269 
 -0.927296 -0.915092 -0.250000 
 -0.926020 -0.915092 -0.257463 
 -0.924745 -0.915092 -0.261194 
 -0.922194 -0.915092 -0.268657 
 -0.919643 -0.915092 -0.276119 
 -0.918367 -0.915092 -0.276119 
 -0.917092 -0.915092 -0.276119 
 -0.915816 -0.915092 -0.276119 
 -0.928571 -0.914510 -0.235075 
 -0.927296 -0.914510 -0.238806 
 -0.926020 -0.914510 -0.246269 
 -0.924745 -0.914510 -0.253731 
 -0.922194 -0.914510 -0.264925 
 -0.919643 -0.914510 -0.268657 
 -0.918367 -0.914510 -0.272388 
 -0.917092 -0.914510 -0.272388 
 -0.915816 -0.914510 -0.272388 
 -0.928571 -0.913928 -0.223881 
 -0.927296 -0.913928 -0.235075 
 -0.926020 -0.913928 -0.246269 
 -0.924745 -0.913928 -0.250000 
 -0.922194 -0.913928 -0.257463 
 -0.919643 -0.913928 -0.264925 
 -0.918367 -0.913928 -0.268657 
 -0.917092 -0.913928 -0.272388 
 -0.915816 -0.913928 -0.272388 
 -0.928571 -0.913347 -0.212687 
 -0.927296 -0.913347 -0.223881 
 -0.926020 -0.913347 -0.238806 
 -0.924745 -0.913347 -0.246269 
 -0.922194 -0.913347 -0.253731 
 -0.919643 -0.913347 -0.261194 
 -0.918367 -0.913347 -0.264925 
 -0.917092 -0.913347 -0.268657 
 -0.915816 -0.913347 -0.272388 
 -0.927296 -0.913347 -0.223881 
 -0.926020 -0.913347 -0.238806 
 -0.924745 -0.913347 -0.246269 
 -0.923469 -0.913347 -0.250000 
 -0.920918 -0.913347 -0.257463 
 -0.918367 -0.913347 -0.264925 
 -0.917092 -0.913347 -0.268657 
 -0.915816 -0.913347 -0.272388 
 -0.914541 -0.913347 -0.272388 
 -0.927296 -0.912765 -0.220149 
 -0.926020 -0.912765 -0.235075 
 -0.924745 -0.912765 -0.242537 
 -0.923469 -0.912765 -0.250000 
 -0.920918 -0.912765 -0.257463 
 -0.918367 -0.912765 -0.264925 
 -0.917092 -0.912765 -0.268657 
 -0.915816 -0.912765 -0.268657 
 -0.914541 -0.912765 -0.272388 
 -0.927296 -0.912184 -0.212687 
 -0.926020 -0.912184 -0.227612 
 -0.924745 -0.912184 -0.238806 
 -0.923469 -0.912184 -0.246269 
 -0.920918 -0.912184 -0.253731 
 -0.918367 -0.912184 -0.261194 
 -0.917092 -0.912184 -0.264925 
 -0.915816 -0.912184 -0.268657 
 -0.914541 -0.912184 -0.268657 
 -0.927296 -0.911602 -0.205224 
 -0.926020 -0.911602 -0.223881 
 -0.924745 -0.911602 -0.235075 
 -0.923469 -0.911602 -0.242537 
 -0.920918 -0.911602 -0.253731 
 -0.918367 -0.911602 -0.261194 
 -0.917092 -0.911602 -0.264925 
 -0.915816 -0.911602 -0.268657 
 -0.914541 -0.911602 -0.268657 
 -0.926020 -0.911602 -0.223881 
 -0.924745 -0.911602 -0.235075 
 -0.923469 -0.911602 -0.242537 
 -0.922194 -0.911602 -0.246269 
 -0.919643 -0.911602 -0.257463 
 -0.917092 -0.911602 -0.264925 
 -0.915816 -0.911602 -0.268657 
 -0.914541 -0.911602 -0.268657 
 -0.913265 -0.911602 -0.268657 
 -0.926020 -0.911021 -0.216418 
 -0.924745 -0.911021 -0.227612 
 -0.923469 -0.911021 -0.235075 
 -0.922194 -0.911021 -0.242537 
 -0.919643 -0.911021 -0.253731 
 -0.917092 -0.911021 -0.261194 
 -0.915816 -0.911021 -0.264925 
 -0.914541 -0.911021 -0.268657 
 -0.913265 -0.911021 -0.268657 
 -0.926020 -0.910439 -0.208955 
 -0.924745 -0.910439 -0.223881 
 -0.923469 -0.910439 -0.231343 
 -0.922194 -0.910439 -0.238806 
 -0.919643 -0.910439 -0.250000 
 -0.917092 -0.910439 -0.257463 
 -0.915816 -0.910439 -0.261194 
 -0.914541 -0.910439 -0.264925 
 -0.913265 -0.910439 -0.268657 
 -0.924745 -0.910439 -0.223881 
 -0.923469 -0.910439 -0.231343 
 -0.922194 -0.910439 -0.238806 
 -0.920918 -0.910439 -0.242537 
 -0.918367 -0.910439 -0.253731 
 -0.915816 -0.910439 -0.261194 
 -0.914541 -0.910439 -0.264925 
 -0.913265 -0.910439 -0.268657 
 -0.911990 -0.910439 -0.268657 
 -0.924745 -0.909858 -0.216418 
 -0.923469 -0.909858 -0.227612 
 -0.922194 -0.909858 -0.235075 
 -0.920918 -0.909858 -0.238806 
 -0.918367 -0.909858 -0.246269 
 -0.915816 -0.909858 -0.257463 
 -0.914541 -0.909858 -0.261194 
 -0.913265 -0.909858 -0.264925 
 -0.911990 -0.909858 -0.268657 
 -0.924745 -0.909276 -0.216418 
 -0.923469 -0.909276 -0.223881 
 -0.922194 -0.909276 -0.231343 
 -0.920918 -0.909276 -0.235075 
 -0.918367 -0.909276 -0.246269 
 -0.915816 -0.909276 -0.253731 
 -0.914541 -0.909276 -0.257463 
 -0.913265 -0.909276 -0.261194 
 -0.911990 -0.909276 -0.264925 
 -0.924745 -0.908694 -0.212687 
 -0.923469 -0.908694 -0.220149 
 -0.922194 -0.908694 -0.227612 
 -0.920918 -0.908694 -0.231343 
 -0.918367 -0.908694 -0.242537 
 -0.915816 -0.908694 -0.250000 
 -0.914541 -0.908694 -0.253731 
 -0.913265 -0.908694 -0.257463 
 -0.911990 -0.908694 -0.257463 
 -0.923469 -0.908694 -0.220149 
 -0.922194 -0.908694 -0.227612 
 -0.920918 -0.908694 -0.231343 
 -0.919643 -0.908694 -0.238806 
 -0.917092 -0.908694 -0.246269 
 -0.914541 -0.908694 -0.253731 
 -0.913265 -0.908694 -0.257463 
 -0.911990 -0.908694 -0.257463 
 -0.910714 -0.908694 -0.261194 
 -0.923469 -0.908113 -0.216418 
 -0.922194 -0.908113 -0.220149 
 -0.920918 -0.908113 -0.227612 
 -0.919643 -0.908113 -0.235075 
 -0.917092 -0.908113 -0.242537 
 -0.914541 -0.908113 -0.253731 
 -0.913265 -0.908113 -0.253731 
 -0.911990 -0.908113 -0.257463 
 -0.910714 -0.908113 -0.261194 
 -0.923469 -0.907531 -0.212687 
 -0.922194 -0.907531 -0.220149 
 -0.920918 -0.907531 -0.227612 
 -0.919643 -0.907531 -0.235075 
 -0.917092 -0.907531 -0.242537 
 -0.914541 -0.907531 -0.253731 
 -0.913265 -0.907531 -0.253731 
 -0.911990 -0.907531 -0.257463 
 -0.910714 -0.907531 -0.257463 
 -0.922194 -0.907531 -0.220149 
 -0.920918 -0.907531 -0.227612 
 -0.919643 -0.907531 -0.235075 
 -0.918367 -0.907531 -0.238806 
 -0.915816 -0.907531 -0.250000 
 -0.913265 -0.907531 -0.253731 
 -0.911990 -0.907531 -0.257463 
 -0.910714 -0.907531 -0.257463 
 -0.909439 -0.907531 -0.257463 
 -0.922194 -0.906950 -0.220149 
 -0.920918 -0.906950 -0.227612 
 -0.919643 -0.906950 -0.231343 
 -0.918367 -0.906950 -0.235075 
 -0.915816 -0.906950 -0.246269 
 -0.913265 -0.906950 -0.253731 
 -0.911990 -0.906950 -0.253731 
 -0.910714 -0.906950 -0.253731 
 -0.909439 -0.906950 -0.253731 
 -0.922194 -0.906368 -0.216418 
 -0.920918 -0.906368 -0.223881 
 -0.919643 -0.906368 -0.227612 
 -0.918367 -0.906368 -0.235075 
 -0.915816 -0.906368 -0.242537 
 -0.913265 -0.906368 -0.250000 
 -0.911990 -0.906368 -0.250000 
 -0.910714 -0.906368 -0.250000 
 -0.909439 -0.906368 -0.250000 
 -0.922194 -0.905787 -0.208955 
 -0.920918 -0.905787 -0.216418 
 -0.919643 -0.905787 -0.223881 
 -0.918367 -0.905787 -0.231343 
 -0.915816 -0.905787 -0.238806 
 -0.913265 -0.905787 -0.246269 
 -0.911990 -0.905787 -0.250000 
 -0.910714 -0.905787 -0.250000 
 -0.909439 -0.905787 -0.250000 
 -0.920918 -0.905787 -0.216418 
 -0.919643 -0.905787 -0.223881 
 -0.918367 -0.905787 -0.231343 
 -0.917092 -0.905787 -0.235075 
 -0.914541 -0.905787 -0.242537 
 -0.911990 -0.905787 -0.250000 
 -0.910714 -0.905787 -0.250000 
 -0.909439 -0.905787 -0.250000 
 -0.908163 -0.905787 -0.250000 
 -0.920918 -0.905205 -0.212687 
 -0.919643 -0.905205 -0.220149 
 -0.918367 -0.905205 -0.227612 
 -0.917092 -0.905205 -0.231343 
 -0.914541 -0.905205 -0.238806 
 -0.911990 -0.905205 -0.250000 
 -0.910714 -0.905205 -0.250000 
 -0.909439 -0.905205 -0.250000 
 -0.908163 -0.905205 -0.250000 
 -0.920918 -0.904623 -0.201493 
 -0.919643 -0.904623 -0.216418 
 -0.918367 -0.904623 -0.220149 
 -0.917092 -0.904623 -0.227612 
 -0.914541 -0.904623 -0.238806 
 -0.911990 -0.904623 -0.246269 
 -0.910714 -0.904623 -0.250000 
 -0.909439 -0.904623 -0.253731 
 -0.908163 -0.904623 -0.253731 
 -0.919643 -0.904623 -0.216418 
 -0.918367 -0.904623 -0.220149 
 -0.917092 -0.904623 -0.227612 
 -0.915816 -0.904623 -0.235075 
 -0.913265 -0.904623 -0.242537 
 -0.910714 -0.904623 -0.250000 
 -0.909439 -0.904623 -0.253731 
 -0.908163 -0.904623 -0.253731 
 -0.906888 -0.904623 -0.253731 
 -0.919643 -0.904042 -0.212687 
 -0.918367 -0.904042 -0.220149 
 -0.917092 -0.904042 -0.227612 
 -0.915816 -0.904042 -0.235075 
 -0.913265 -0.904042 -0.238806 
 -0.910714 -0.904042 -0.246269 
 -0.909439 -0.904042 -0.250000 
 -0.908163 -0.904042 -0.253731 
 -0.906888 -0.904042 -0.253731 
 -0.919643 -0.903460 -0.197761 
 -0.918367 -0.903460 -0.208955 
 -0.917092 -0.903460 -0.220149 
 -0.915816 -0.903460 -0.227612 
 -0.913265 -0.903460 -0.238806 
 -0.910714 -0.903460 -0.242537 
 -0.909439 -0.903460 -0.246269 
 -0.908163 -0.903460 -0.250000 
 -0.906888 -0.903460 -0.246269 
 -0.919643 -0.902879 -0.186567 
 -0.918367 -0.902879 -0.205224 
 -0.917092 -0.902879 -0.216418 
 -0.915816 -0.902879 -0.223881 
 -0.913265 -0.902879 -0.235075 
 -0.910714 -0.902879 -0.242537 
 -0.909439 -0.902879 -0.246269 
 -0.908163 -0.902879 -0.246269 
 -0.906888 -0.902879 -0.242537 
 -0.918367 -0.902879 -0.205224 
 -0.917092 -0.902879 -0.216418 
 -0.915816 -0.902879 -0.223881 
 -0.914541 -0.902879 -0.235075 
 -0.911990 -0.902879 -0.238806 
 -0.909439 -0.902879 -0.246269 
 -0.908163 -0.902879 -0.246269 
 -0.906888 -0.902879 -0.242537 
 -0.905612 -0.902879 -0.242537 
 -0.918367 -0.902297 -0.194030 
 -0.917092 -0.902297 -0.208955 
 -0.915816 -0.902297 -0.216418 
 -0.914541 -0.902297 -0.223881 
 -0.911990 -0.902297 -0.235075 
 -0.909439 -0.902297 -0.238806 
 -0.908163 -0.902297 -0.238806 
 -0.906888 -0.902297 -0.235075 
 -0.905612 -0.902297 -0.235075 
 -0.918367 -0.901716 -0.190299 
 -0.917092 -0.901716 -0.201493 
 -0.915816 -0.901716 -0.212687 
 -0.914541 -0.901716 -0.220149 
 -0.911990 -0.901716 -0.231343 
 -0.909439 -0.901716 -0.235075 
 -0.908163 -0.901716 -0.235075 
 -0.906888 -0.901716 -0.231343 
 -0.905612 -0.901716 -0.231343 
 -0.917092 -0.901134 -0.197761 
 -0.915816 -0.901134 -0.205224 
 -0.914541 -0.901134 -0.216418 
 -0.913265 -0.901134 -0.220149 
 -0.910714 -0.901134 -0.231343 
 -0.908163 -0.901134 -0.231343 
 -0.906888 -0.901134 -0.231343 
 -0.905612 -0.901134 -0.231343 
 -0.904337 -0.901134 -0.231343 
 -0.917092 -0.900552 -0.194030 
 -0.915816 -0.900552 -0.205224 
 -0.914541 -0.900552 -0.212687 
 -0.913265 -0.900552 -0.216418 
 -0.910714 -0.900552 -0.227612 
 -0.908163 -0.900552 -0.231343 
 -0.906888 -0.900552 -0.231343 
 -0.905612 -0.900552 -0.231343 
 -0.904337 -0.900552 -0.231343 
 -0.917092 -0.899971 -0.190299 
 -0.915816 -0.899971 -0.201493 
 -0.914541 -0.899971 -0.208955 
 -0.913265 -0.899971 -0.216418 
 -0.910714 -0.899971 -0.223881 
 -0.908163 -0.899971 -0.231343 
 -0.906888 -0.899971 -0.231343 
 -0.905612 -0.899971 -0.231343 
 -0.904337 -0.899971 -0.231343 
 -0.915816 -0.899971 -0.201493 
 -0.914541 -0.899971 -0.208955 
 -0.913265 -0.899971 -0.216418 
 -0.911990 -0.899971 -0.220149 
 -0.909439 -0.899971 -0.227612 
 -0.906888 -0.899971 -0.231343 
 -0.905612 -0.899971 -0.231343 
 -0.904337 -0.899971 -0.231343 
 -0.903061 -0.899971 -0.231343 
 -0.915816 -0.899389 -0.197761 
 -0.914541 -0.899389 -0.205224 
 -0.913265 -0.899389 -0.212687 
 -0.911990 -0.899389 -0.216418 
 -0.909439 -0.899389 -0.223881 
 -0.906888 -0.899389 -0.227612 
 -0.905612 -0.899389 -0.231343 
 -0.904337 -0.899389 -0.231343 
 -0.903061 -0.899389 -0.231343 
 -0.915816 -0.898808 -0.190299 
 -0.914541 -0.898808 -0.201493 
 -0.913265 -0.898808 -0.208955 
 -0.911990 -0.898808 -0.212687 
 -0.909439 -0.898808 -0.220149 
 -0.906888 -0.898808 -0.223881 
 -0.905612 -0.898808 -0.227612 
 -0.904337 -0.898808 -0.231343 
 -0.903061 -0.898808 -0.231343 
 -0.914541 -0.898226 -0.197761 
 -0.913265 -0.898226 -0.201493 
 -0.911990 -0.898226 -0.208955 
 -0.910714 -0.898226 -0.212687 
 -0.908163 -0.898226 -0.216418 
 -0.905612 -0.898226 -0.227612 
 -0.904337 -0.898226 -0.231343 
 -0.903061 -0.898226 -0.231343 
 -0.901786 -0.898226 -0.220149 
 -0.914541 -0.897645 -0.194030 
 -0.913265 -0.897645 -0.197761 
 -0.911990 -0.897645 -0.205224 
 -0.910714 -0.897645 -0.205224 
 -0.908163 -0.897645 -0.216418 
 -0.905612 -0.897645 -0.227612 
 -0.904337 -0.897645 -0.227612 
 -0.903061 -0.897645 -0.223881 
 -0.901786 -0.897645 -0.216418 
 -0.914541 -0.897063 -0.186567 
 -0.913265 -0.897063 -0.194030 
 -0.911990 -0.897063 -0.197761 
 -0.910714 -0.897063 -0.201493 
 -0.908163 -0.897063 -0.212687 
 -0.905612 -0.897063 -0.216418 
 -0.904337 -0.897063 -0.220149 
 -0.903061 -0.897063 -0.216418 
 -0.901786 -0.897063 -0.208955 
 -0.913265 -0.897063 -0.194030 
 -0.911990 -0.897063 -0.197761 
 -0.910714 -0.897063 -0.201493 
 -0.909439 -0.897063 -0.208955 
 -0.906888 -0.897063 -0.212687 
 -0.904337 -0.897063 -0.220149 
 -0.903061 -0.897063 -0.216418 
 -0.901786 -0.897063 -0.208955 
 -0.900510 -0.897063 -0.201493 
 -0.913265 -0.896482 -0.190299 
 -0.911990 -0.896482 -0.194030 
 -0.910714 -0.896482 -0.201493 
 -0.909439 -0.896482 -0.208955 
 -0.906888 -0.896482 -0.216418 
 -0.904337 -0.896482 -0.212687 
 -0.903061 -0.896482 -0.212687 
 -0.901786 -0.896482 -0.208955 
 -0.900510 -0.896482 -0.197761 
 -0.913265 -0.895900 -0.186567 
 -0.911990 -0.895900 -0.194030 
 -0.910714 -0.895900 -0.197761 
 -0.909439 -0.895900 -0.205224 
 -0.906888 -0.895900 -0.212687 
 -0.904337 -0.895900 -0.212687 
 -0.903061 -0.895900 -0.208955 
 -0.901786 -0.895900 -0.208955 
 -0.900510 -0.895900 -0.197761 
 -0.913265 -0.895318 -0.182836 
 -0.911990 -0.895318 -0.194030 
 -0.910714 -0.895318 -0.197761 
 -0.909439 -0.895318 -0.201493 
 -0.906888 -0.895318 -0.212687 
 -0.904337 -0.895318 -0.212687 
 -0.903061 -0.895318 -0.212687 
 -0.901786 -0.895318 -0.205224 
 -0.900510 -0.895318 -0.197761 
 -0.911990 -0.895318 -0.194030 
 -0.910714 -0.895318 -0.197761 
 -0.909439 -0.895318 -0.201493 
 -0.908163 -0.895318 -0.205224 
 -0.905612 -0.895318 -0.212687 
 -0.903061 -0.895318 -0.212687 
 -0.901786 -0.895318 -0.205224 
 -0.900510 -0.895318 -0.197761 
 -0.899235 -0.895318 -0.186567 
 -0.911990 -0.894737 -0.179104 
 -0.910714 -0.894737 -0.186567 
 -0.909439 -0.894737 -0.194030 
 -0.908163 -0.894737 -0.197761 
 -0.905612 -0.894737 -0.208955 
 -0.903061 -0.894737 -0.212687 
 -0.901786 -0.894737 -0.208955 
 -0.900510 -0.894737 -0.197761 
 -0.899235 -0.894737 -0.186567 
 -0.911990 -0.894155 -0.164179 
 -0.910714 -0.894155 -0.182836 
 -0.909439 -0.894155 -0.190299 
 -0.908163 -0.894155 -0.194030 
 -0.905612 -0.894155 -0.201493 
 -0.903061 -0.894155 -0.208955 
 -0.901786 -0.894155 -0.212687 
 -0.900510 -0.894155 -0.205224 
 -0.899235 -0.894155 -0.190299 
 -0.910714 -0.894155 -0.182836 
 -0.909439 -0.894155 -0.190299 
 -0.908163 -0.894155 -0.194030 
 -0.906888 -0.894155 -0.197761 
 -0.904337 -0.894155 -0.208955 
 -0.901786 -0.894155 -0.212687 
 -0.900510 -0.894155 -0.205224 
 -0.899235 -0.894155 -0.190299 
 -0.897959 -0.894155 -0.182836 
 -0.910714 -0.893574 -0.167910 
 -0.909439 -0.893574 -0.179104 
 -0.908163 -0.893574 -0.182836 
 -0.906888 -0.893574 -0.190299 
 -0.904337 -0.893574 -0.201493 
 -0.901786 -0.893574 -0.205224 
 -0.900510 -0.893574 -0.205224 
 -0.899235 -0.893574 -0.197761 
 -0.897959 -0.893574 -0.194030 
 -0.910714 -0.892992 -0.160448 
 -0.909439 -0.892992 -0.171642 
 -0.908163 -0.892992 -0.179104 
 -0.906888 -0.892992 -0.186567 
 -0.904337 -0.892992 -0.194030 
 -0.901786 -0.892992 -0.197761 
 -0.900510 -0.892992 -0.197761 
 -0.899235 -0.892992 -0.197761 
 -0.897959 -0.892992 -0.182836 
 -0.909439 -0.892992 -0.171642 
 -0.908163 -0.892992 -0.179104 
 -0.906888 -0.892992 -0.186567 
 -0.905612 -0.892992 -0.190299 
 -0.903061 -0.892992 -0.201493 
 -0.900510 -0.892992 -0.197761 
 -0.899235 -0.892992 -0.197761 
 -0.897959 -0.892992 -0.182836 
 -0.896684 -0.892992 -0.175373 
 -0.909439 -0.892411 -0.164179 
 -0.908163 -0.892411 -0.171642 
 -0.906888 -0.892411 -0.179104 
 -0.905612 -0.892411 -0.186567 
 -0.903061 -0.892411 -0.194030 
 -0.900510 -0.892411 -0.194030 
 -0.899235 -0.892411 -0.190299 
 -0.897959 -0.892411 -0.175373 
 -0.896684 -0.892411 -0.164179 
 -0.909439 -0.891829 -0.160448 
 -0.908163 -0.891829 -0.167910 
 -0.906888 -0.891829 -0.179104 
 -0.905612 -0.891829 -0.182836 
 -0.903061 -0.891829 -0.194030 
 -0.900510 -0.891829 -0.194030 
 -0.899235 -0.891829 -0.182836 
 -0.897959 -0.891829 -0.171642 
 -0.896684 -0.891829 -0.164179 
 -0.909439 -0.891247 -0.156716 
 -0.908163 -0.891247 -0.167910 
 -0.906888 -0.891247 -0.175373 
 -0.905612 -0.891247 -0.179104 
 -0.903061 -0.891247 -0.190299 
 -0.900510 -0.891247 -0.194030 
 -0.899235 -0.891247 -0.182836 
 -0.897959 -0.891247 -0.171642 
 -0.896684 -0.891247 -0.160448 
 -0.908163 -0.891247 -0.167910 
 -0.906888 -0.891247 -0.175373 
 -0.905612 -0.891247 -0.179104 
 -0.904337 -0.891247 -0.182836 
 -0.901786 -0.891247 -0.194030 
 -0.899235 -0.891247 -0.182836 
 -0.897959 -0.891247 -0.171642 
 -0.896684 -0.891247 -0.160448 
 -0.895408 -0.891247 -0.152985 
 -0.908163 -0.890666 -0.156716 
 -0.906888 -0.890666 -0.164179 
 -0.905612 -0.890666 -0.171642 
 -0.904337 -0.890666 -0.179104 
 -0.901786 -0.890666 -0.190299 
 -0.899235 -0.890666 -0.186567 
 -0.897959 -0.890666 -0.171642 
 -0.896684 -0.890666 -0.164179 
 -0.895408 -0.890666 -0.152985 
 -0.908163 -0.890084 -0.149254 
 -0.906888 -0.890084 -0.160448 
 -0.905612 -0.890084 -0.167910 
 -0.904337 -0.890084 -0.179104 
 -0.901786 -0.890084 -0.190299 
 -0.899235 -0.890084 -0.186567 
 -0.897959 -0.890084 -0.175373 
 -0.896684 -0.890084 -0.167910 
 -0.895408 -0.890084 -0.156716 
 -0.906888 -0.890084 -0.160448 
 -0.905612 -0.890084 -0.167910 
 -0.904337 -0.890084 -0.179104 
 -0.903061 -0.890084 -0.182836 
 -0.900510 -0.890084 -0.194030 
 -0.897959 -0.890084 -0.175373 
 -0.896684 -0.890084 -0.167910 
 -0.895408 -0.890084 -0.156716 
 -0.894133 -0.890084 -0.141791 
 -0.906888 -0.889503 -0.152985 
 -0.905612 -0.889503 -0.164179 
 -0.904337 -0.889503 -0.171642 
 -0.903061 -0.889503 -0.179104 
 -0.900510 -0.889503 -0.182836 
 -0.897959 -0.889503 -0.175373 
 -0.896684 -0.889503 -0.171642 
 -0.895408 -0.889503 -0.160448 
 -0.894133 -0.889503 -0.145522 
 -0.906888 -0.888921 -0.149254 
 -0.905612 -0.888921 -0.160448 
 -0.904337 -0.888921 -0.167910 
 -0.903061 -0.888921 -0.175373 
 -0.900510 -0.888921 -0.179104 
 -0.897959 -0.888921 -0.175373 
 -0.896684 -0.888921 -0.175373 
 -0.895408 -0.888921 -0.167910 
 -0.894133 -0.888921 -0.152985 
 -0.906888 -0.888340 -0.138060 
 -0.905612 -0.888340 -0.152985 
 -0.904337 -0.888340 -0.164179 
 -0.903061 -0.888340 -0.175373 
 -0.900510 -0.888340 -0.175373 
 -0.897959 -0.888340 -0.164179 
 -0.896684 -0.888340 -0.171642 
 -0.895408 -0.888340 -0.171642 
 -0.894133 -0.888340 -0.167910 
 -0.905612 -0.888340 -0.152985 
 -0.904337 -0.888340 -0.164179 
 -0.903061 -0.888340 -0.175373 
 -0.901786 -0.888340 -0.175373 
 -0.899235 -0.888340 -0.171642 
 -0.896684 -0.888340 -0.171642 
 -0.895408 -0.888340 -0.171642 
 -0.894133 -0.888340 -0.167910 
 -0.892857 -0.888340 -0.145522 
 -0.905612 -0.887758 -0.145522 
 -0.904337 -0.887758 -0.152985 
 -0.903061 -0.887758 -0.164179 
 -0.901786 -0.887758 -0.167910 
 -0.899235 -0.887758 -0.171642 
 -0.896684 -0.887758 -0.156716 
 -0.895408 -0.887758 -0.156716 
 -0.894133 -0.887758 -0.156716 
 -0.892857 -0.887758 -0.156716 
 -0.905612 -0.887177 -0.141791 
 -0.904337 -0.887177 -0.145522 
 -0.903061 -0.887177 -0.152985 
 -0.901786 -0.887177 -0.160448 
 -0.899235 -0.887177 -0.156716 
 -0.896684 -0.887177 -0.152985 
 -0.895408 -0.887177 -0.149254 
 -0.894133 -0.887177 -0.152985 
 -0.892857 -0.887177 -0.156716 
 -0.904337 -0.887177 -0.145522 
 -0.903061 -0.887177 -0.152985 
 -0.901786 -0.887177 -0.160448 
 -0.900510 -0.887177 -0.160448 
 -0.897959 -0.887177 -0.156716 
 -0.895408 -0.887177 -0.149254 
 -0.894133 -0.887177 -0.152985 
 -0.892857 -0.887177 -0.156716 
 -0.891582 -0.887177 -0.152985 
 -0.904337 -0.886595 -0.141791 
 -0.903061 -0.886595 -0.149254 
 -0.901786 -0.886595 -0.156716 
 -0.900510 -0.886595 -0.156716 
 -0.897959 -0.886595 -0.156716 
 -0.895408 -0.886595 -0.145522 
 -0.894133 -0.886595 -0.145522 
 -0.892857 -0.886595 -0.149254 
 -0.891582 -0.886595 -0.156716 
 -0.904337 -0.886013 -0.130597 
 -0.903061 -0.886013 -0.141791 
 -0.901786 -0.886013 -0.149254 
 -0.900510 -0.886013 -0.152985 
 -0.897959 -0.886013 -0.156716 
 -0.895408 -0.886013 -0.138060 
 -0.894133 -0.886013 -0.130597 
 -0.892857 -0.886013 -0.130597 
 -0.891582 -0.886013 -0.134328 
 -0.904337 -0.885432 -0.123134 
 -0.903061 -0.885432 -0.130597 
 -0.901786 -0.885432 -0.138060 
 -0.900510 -0.885432 -0.141791 
 -0.897959 -0.885432 -0.149254 
 -0.895408 -0.885432 -0.134328 
 -0.894133 -0.885432 -0.126866 
 -0.892857 -0.885432 -0.119403 
 -0.891582 -0.885432 -0.119403 
 -0.903061 -0.885432 -0.130597 
 -0.901786 -0.885432 -0.138060 
 -0.900510 -0.885432 -0.141791 
 -0.899235 -0.885432 -0.145522 
 -0.896684 -0.885432 -0.152985 
 -0.894133 -0.885432 -0.126866 
 -0.892857 -0.885432 -0.119403 
 -0.891582 -0.885432 -0.119403 
 -0.890306 -0.885432 -0.126866 
 -0.903061 -0.884850 -0.115672 
 -0.901786 -0.884850 -0.126866 
 -0.900510 -0.884850 -0.130597 
 -0.899235 -0.884850 -0.130597 
 -0.896684 -0.884850 -0.138060 
 -0.894133 -0.884850 -0.123134 
 -0.892857 -0.884850 -0.111940 
 -0.891582 -0.884850 -0.104478 
 -0.890306 -0.884850 -0.104478 
 -0.903061 -0.884269 -0.108209 
 -0.901786 -0.884269 -0.119403 
 -0.900510 -0.884269 -0.123134 
 -0.899235 -0.884269 -0.123134 
 -0.896684 -0.884269 -0.130597 
 -0.894133 -0.884269 -0.130597 
 -0.892857 -0.884269 -0.104478 
 -0.891582 -0.884269 -0.097015 
 -0.890306 -0.884269 -0.097015 
 -0.901786 -0.884269 -0.119403 
 -0.900510 -0.884269 -0.123134 
 -0.899235 -0.884269 -0.123134 
 -0.897959 -0.884269 -0.126866 
 -0.895408 -0.884269 -0.138060 
 -0.892857 -0.884269 -0.104478 
 -0.891582 -0.884269 -0.097015 
 -0.890306 -0.884269 -0.097015 
 -0.889031 -0.884269 -0.100746 
 -0.901786 -0.883687 -0.108209 
 -0.900510 -0.883687 -0.111940 
 -0.899235 -0.883687 -0.115672 
 -0.897959 -0.883687 -0.115672 
 -0.895408 -0.883687 -0.130597 
 -0.892857 -0.883687 -0.104478 
 -0.891582 -0.883687 -0.093284 
 -0.890306 -0.883687 -0.082090 
 -0.889031 -0.883687 -0.082090 
 -0.901786 -0.883106 -0.104478 
 -0.900510 -0.883106 -0.108209 
 -0.899235 -0.883106 -0.108209 
 -0.897959 -0.883106 -0.111940 
 -0.895408 -0.883106 -0.119403 
 -0.892857 -0.883106 -0.108209 
 -0.891582 -0.883106 -0.089552 
 -0.890306 -0.883106 -0.074627 
 -0.889031 -0.883106 -0.067164 
 -0.901786 -0.882524 -0.097015 
 -0.900510 -0.882524 -0.104478 
 -0.899235 -0.882524 -0.104478 
 -0.897959 -0.882524 -0.104478 
 -0.895408 -0.882524 -0.119403 
 -0.892857 -0.882524 -0.111940 
 -0.891582 -0.882524 -0.078358 
 -0.890306 -0.882524 -0.063433 
 -0.889031 -0.882524 -0.048507 
 -0.900510 -0.882524 -0.104478 
 -0.899235 -0.882524 -0.104478 
 -0.897959 -0.882524 -0.104478 
 -0.896684 -0.882524 -0.111940 
 -0.894133 -0.882524 -0.119403 
 -0.891582 -0.882524 -0.078358 
 -0.890306 -0.882524 -0.063433 
 -0.889031 -0.882524 -0.048507 
 -0.887755 -0.882524 -0.037313 
 -0.900510 -0.881942 -0.093284 
 -0.899235 -0.881942 -0.097015 
 -0.897959 -0.881942 -0.100746 
 -0.896684 -0.881942 -0.108209 
 -0.894133 -0.881942 -0.119403 
 -0.891582 -0.881942 -0.074627 
 -0.890306 -0.881942 -0.055970 
 -0.889031 -0.881942 -0.033582 
 -0.887755 -0.881942 -0.018657 
 -0.900510 -0.881361 -0.089552 
 -0.899235 -0.881361 -0.093284 
 -0.897959 -0.881361 -0.097015 
 -0.896684 -0.881361 -0.108209 
 -0.894133 -0.881361 -0.111940 
 -0.891582 -0.881361 -0.070896 
 -0.890306 -0.881361 -0.052239 
 -0.889031 -0.881361 -0.026119 
 -0.887755 -0.881361 -0.011194 
 -0.899235 -0.881361 -0.093284 
 -0.897959 -0.881361 -0.097015 
 -0.896684 -0.881361 -0.108209 
 -0.895408 -0.881361 -0.115672 
 -0.892857 -0.881361 -0.085821 
 -0.890306 -0.881361 -0.052239 
 -0.889031 -0.881361 -0.026119 
 -0.887755 -0.881361 -0.011194 
 -0.886480 -0.881361 0.000000 
 -0.899235 -0.880779 -0.089552 
 -0.897959 -0.880779 -0.100746 
 -0.896684 -0.880779 -0.100746 
 -0.895408 -0.880779 -0.100746 
 -0.892857 -0.880779 -0.078358 
 -0.890306 -0.880779 -0.041045 
 -0.889031 -0.880779 -0.018657 
 -0.887755 -0.880779 -0.003731 
 -0.886480 -0.880779 0.011194 
 -0.899235 -0.880198 -0.089552 
 -0.897959 -0.880198 -0.100746 
 -0.896684 -0.880198 -0.100746 
 -0.895408 -0.880198 -0.097015 
 -0.892857 -0.880198 -0.078358 
 -0.890306 -0.880198 -0.037313 
 -0.889031 -0.880198 -0.018657 
 -0.887755 -0.880198 0.000000 
 -0.886480 -0.880198 0.014925 
 -0.897959 -0.880198 -0.100746 
 -0.896684 -0.880198 -0.100746 
 -0.895408 -0.880198 -0.097015 
 -0.894133 -0.880198 -0.089552 
 -0.891582 -0.880198 -0.059701 
 -0.889031 -0.880198 -0.018657 
 -0.887755 -0.880198 0.000000 
 -0.886480 -0.880198 0.014925 
 -0.885204 -0.880198 0.033582 
 -0.897959 -0.879616 -0.097015 
 -0.896684 -0.879616 -0.093284 
 -0.895408 -0.879616 -0.089552 
 -0.894133 -0.879616 -0.082090 
 -0.891582 -0.879616 -0.048507 
 -0.889031 -0.879616 -0.014925 
 -0.887755 -0.879616 0.000000 
 -0.886480 -0.879616 0.018657 
 -0.885204 -0.879616 0.037313 
 -0.897959 -0.879035 -0.085821 
 -0.896684 -0.879035 -0.085821 
 -0.895408 -0.879035 -0.085821 
 -0.894133 -0.879035 -0.074627 
 -0.891582 -0.879035 -0.044776 
 -0.889031 -0.879035 -0.014925 
 -0.887755 -0.879035 0.003731 
 -0.886480 -0.879035 0.018657 
 -0.885204 -0.879035 0.037313 
 -0.897959 -0.878453 -0.078358 
 -0.896684 -0.878453 -0.082090 
 -0.895408 -0.878453 -0.078358 
 -0.894133 -0.878453 -0.067164 
 -0.891582 -0.878453 -0.037313 
 -0.889031 -0.878453 -0.014925 
 -0.887755 -0.878453 0.000000 
 -0.886480 -0.878453 0.018657 
 -0.885204 -0.878453 0.033582 
 -0.896684 -0.878453 -0.082090 
 -0.895408 -0.878453 -0.078358 
 -0.894133 -0.878453 -0.067164 
 -0.892857 -0.878453 -0.048507 
 -0.890306 -0.878453 -0.029851 
 -0.887755 -0.878453 0.000000 
 -0.886480 -0.878453 0.018657 
 -0.885204 -0.878453 0.033582 
 -0.883929 -0.878453 0.052239 
 -0.896684 -0.877871 -0.082090 
 -0.895408 -0.877871 -0.074627 
 -0.894133 -0.877871 -0.059701 
 -0.892857 -0.877871 -0.044776 
 -0.890306 -0.877871 -0.026119 
 -0.887755 -0.877871 0.003731 
 -0.886480 -0.877871 0.018657 
 -0.885204 -0.877871 0.033582 
 -0.883929 -0.877871 0.048507 
 -0.896684 -0.877290 -0.074627 
 -0.895408 -0.877290 -0.070896 
 -0.894133 -0.877290 -0.055970 
 -0.892857 -0.877290 -0.041045 
 -0.890306 -0.877290 -0.018657 
 -0.887755 -0.877290 0.011194 
 -0.886480 -0.877290 0.022388 
 -0.885204 -0.877290 0.037313 
 -0.883929 -0.877290 0.052239 
 -0.895408 -0.877290 -0.070896 
 -0.894133 -0.877290 -0.055970 
 -0.892857 -0.877290 -0.041045 
 -0.891582 -0.877290 -0.029851 
 -0.889031 -0.877290 -0.003731 
 -0.886480 -0.877290 0.022388 
 -0.885204 -0.877290 0.037313 
 -0.883929 -0.877290 0.052239 
 -0.882653 -0.877290 0.067164 
 -0.895408 -0.876708 -0.063433 
 -0.894133 -0.876708 -0.055970 
 -0.892857 -0.876708 -0.041045 
 -0.891582 -0.876708 -0.029851 
 -0.889031 -0.876708 -0.003731 
 -0.886480 -0.876708 0.026119 
 -0.885204 -0.876708 0.041045 
 -0.883929 -0.876708 0.055970 
 -0.882653 -0.876708 0.070896 
 -0.895408 -0.876127 -0.059701 
 -0.894133 -0.876127 -0.059701 
 -0.892857 -0.876127 -0.044776 
 -0.891582 -0.876127 -0.033582 
 -0.889031 -0.876127 -0.003731 
 -0.886480 -0.876127 0.022388 
 -0.885204 -0.876127 0.037313 
 -0.883929 -0.876127 0.052239 
 -0.882653 -0.876127 0.067164 
 -0.894133 -0.875545 -0.048507 
 -0.892857 -0.875545 -0.044776 
 -0.891582 -0.875545 -0.033582 
 -0.890306 -0.875545 -0.022388 
 -0.887755 -0.875545 0.007463 
 -0.885204 -0.875545 0.033582 
 -0.883929 -0.875545 0.048507 
 -0.882653 -0.875545 0.063433 
 -0.881378 -0.875545 0.085821 
 -0.894133 -0.874964 -0.037313 
 -0.892857 -0.874964 -0.044776 
 -0.891582 -0.874964 -0.041045 
 -0.890306 -0.874964 -0.026119 
 -0.887755 -0.874964 0.000000 
 -0.885204 -0.874964 0.029851 
 -0.883929 -0.874964 0.044776 
 -0.882653 -0.874964 0.059701 
 -0.881378 -0.874964 0.078358 
 -0.894133 -0.874382 -0.022388 
 -0.892857 -0.874382 -0.033582 
 -0.891582 -0.874382 -0.037313 
 -0.890306 -0.874382 -0.026119 
 -0.887755 -0.874382 0.000000 
 -0.885204 -0.874382 0.026119 
 -0.883929 -0.874382 0.041045 
 -0.882653 -0.874382 0.055970 
 -0.881378 -0.874382 0.074627 
 -0.892857 -0.874382 -0.033582 
 -0.891582 -0.874382 -0.037313 
 -0.890306 -0.874382 -0.026119 
 -0.889031 -0.874382 -0.014925 
 -0.886480 -0.874382 0.011194 
 -0.883929 -0.874382 0.041045 
 -0.882653 -0.874382 0.055970 
 -0.881378 -0.874382 0.074627 
 -0.880102 -0.874382 0.100746 
 -0.892857 -0.873801 -0.011194 
 -0.891582 -0.873801 -0.011194 
 -0.890306 -0.873801 -0.022388 
 -0.889031 -0.873801 -0.026119 
 -0.886480 -0.873801 0.007463 
 -0.883929 -0.873801 0.041045 
 -0.882653 -0.873801 0.055970 
 -0.881378 -0.873801 0.074627 
 -0.880102 -0.873801 0.097015 
 -0.892857 -0.873219 0.011194 
 -0.891582 -0.873219 0.011194 
 -0.890306 -0.873219 -0.003731 
 -0.889031 -0.873219 -0.014925 
 -0.886480 -0.873219 0.007463 
 -0.883929 -0.873219 0.037313 
 -0.882653 -0.873219 0.055970 
 -0.881378 -0.873219 0.074627 
 -0.880102 -0.873219 0.093284 
 -0.891582 -0.873219 0.011194 
 -0.890306 -0.873219 -0.003731 
 -0.889031 -0.873219 -0.014925 
 -0.887755 -0.873219 -0.003731 
 -0.885204 -0.873219 0.022388 
 -0.882653 -0.873219 0.055970 
 -0.881378 -0.873219 0.074627 
 -0.880102 -0.873219 0.093284 
 -0.878827 -0.873219 0.111940 
 -0.891582 -0.872637 0.018657 
 -0.890306 -0.872637 0.011194 
 -0.889031 -0.872637 -0.007463 
 -0.887755 -0.872637 0.000000 
 -0.885204 -0.872637 0.022388 
 -0.882653 -0.872637 0.052239 
 -0.881378 -0.872637 0.070896 
 -0.880102 -0.872637 0.085821 
 -0.878827 -0.872637 0.100746 
 -0.891582 -0.872056 0.029851 
 -0.890306 -0.872056 0.014925 
 -0.889031 -0.872056 -0.003731 
 -0.887755 -0.872056 0.007463 
 -0.885204 -0.872056 0.037313 
 -0.882653 -0.872056 0.063433 
 -0.881378 -0.872056 0.074627 
 -0.880102 -0.872056 0.089552 
 -0.878827 -0.872056 0.100746 
 -0.891582 -0.871474 0.041045 
 -0.890306 -0.871474 0.018657 
 -0.889031 -0.871474 0.014925 
 -0.887755 -0.871474 0.026119 
 -0.885204 -0.871474 0.044776 
 -0.882653 -0.871474 0.074627 
 -0.881378 -0.871474 0.093284 
 -0.880102 -0.871474 0.108209 
 -0.878827 -0.871474 0.119403 
 -0.890306 -0.871474 0.018657 
 -0.889031 -0.871474 0.014925 
 -0.887755 -0.871474 0.026119 
 -0.886480 -0.871474 0.037313 
 -0.883929 -0.871474 0.059701 
 -0.881378 -0.871474 0.093284 
 -0.880102 -0.871474 0.108209 
 -0.878827 -0.871474 0.119403 
 -0.877551 -0.871474 0.130597 
 -0.890306 -0.870893 0.037313 
 -0.889031 -0.870893 0.029851 
 -0.887755 -0.870893 0.033582 
 -0.886480 -0.870893 0.044776 
 -0.883929 -0.870893 0.067164 
 -0.881378 -0.870893 0.115672 
 -0.880102 -0.870893 0.138060 
 -0.878827 -0.870893 0.152985 
 -0.877551 -0.870893 0.164179 
 -0.890306 -0.870311 0.052239 
 -0.889031 -0.870311 0.033582 
 -0.887755 -0.870311 0.037313 
 -0.886480 -0.870311 0.048507 
 -0.883929 -0.870311 0.078358 
 -0.881378 -0.870311 0.126866 
 -0.880102 -0.870311 0.149254 
 -0.878827 -0.870311 0.171642 
 -0.877551 -0.870311 0.186567 
 -0.889031 -0.870311 0.033582 
 -0.887755 -0.870311 0.037313 
 -0.886480 -0.870311 0.048507 
 -0.885204 -0.870311 0.059701 
 -0.882653 -0.870311 0.100746 
 -0.880102 -0.870311 0.149254 
 -0.878827 -0.870311 0.171642 
 -0.877551 -0.870311 0.186567 
 -0.876276 -0.870311 0.194030 
 -0.889031 -0.869730 0.059701 
 -0.887755 -0.869730 0.052239 
 -0.886480 -0.869730 0.048507 
 -0.885204 -0.869730 0.063433 
 -0.882653 -0.869730 0.111940 
 -0.880102 -0.869730 0.160448 
 -0.878827 -0.869730 0.186567 
 -0.877551 -0.869730 0.208955 
 -0.876276 -0.869730 0.227612 
 -0.889031 -0.869148 0.082090 
 -0.887755 -0.869148 0.074627 
 -0.886480 -0.869148 0.059701 
 -0.885204 -0.869148 0.063433 
 -0.882653 -0.869148 0.108209 
 -0.880102 -0.869148 0.167910 
 -0.878827 -0.869148 0.194030 
 -0.877551 -0.869148 0.220149 
 -0.876276 -0.869148 0.242537 
 -0.887755 -0.869148 0.074627 
 -0.886480 -0.869148 0.059701 
 -0.885204 -0.869148 0.063433 
 -0.883929 -0.869148 0.082090 
 -0.881378 -0.869148 0.138060 
 -0.878827 -0.869148 0.194030 
 -0.877551 -0.869148 0.220149 
 -0.876276 -0.869148 0.242537 
 -0.875000 -0.869148 0.257463 
 -0.887755 -0.868566 0.097015 
 -0.886480 -0.868566 0.082090 
 -0.885204 -0.868566 0.067164 
 -0.883929 -0.868566 0.089552 
 -0.881378 -0.868566 0.145522 
 -0.878827 -0.868566 0.201493 
 -0.877551 -0.868566 0.227612 
 -0.876276 -0.868566 0.257463 
 -0.875000 -0.868566 0.276119 
 -0.887755 -0.867985 0.111940 
 -0.886480 -0.867985 0.093284 
 -0.885204 -0.867985 0.085821 
 -0.883929 -0.867985 0.097015 
 -0.881378 -0.867985 0.149254 
 -0.878827 -0.867985 0.205224 
 -0.877551 -0.867985 0.231343 
 -0.876276 -0.867985 0.261194 
 -0.875000 -0.867985 0.279851 
 -0.887755 -0.867403 0.130597 
 -0.886480 -0.867403 0.111940 
 -0.885204 -0.867403 0.100746 
 -0.883929 -0.867403 0.104478 
 -0.881378 -0.867403 0.152985 
 -0.878827 -0.867403 0.208955 
 -0.877551 -0.867403 0.235075 
 -0.876276 -0.867403 0.261194 
 -0.875000 -0.867403 0.283582 
 -0.886480 -0.867403 0.111940 
 -0.885204 -0.867403 0.100746 
 -0.883929 -0.867403 0.104478 
 -0.882653 -0.867403 0.130597 
 -0.880102 -0.867403 0.182836 
 -0.877551 -0.867403 0.235075 
 -0.876276 -0.867403 0.261194 
 -0.875000 -0.867403 0.283582 
 -0.873724 -0.867403 0.313433 
 -0.886480 -0.866822 0.126866 
 -0.885204 -0.866822 0.108209 
 -0.883929 -0.866822 0.111940 
 -0.882653 -0.866822 0.134328 
 -0.880102 -0.866822 0.186567 
 -0.877551 -0.866822 0.238806 
 -0.876276 -0.866822 0.264925 
 -0.875000 -0.866822 0.287313 
 -0.873724 -0.866822 0.313433 
 -0.886480 -0.866240 0.141791 
 -0.885204 -0.866240 0.126866 
 -0.883929 -0.866240 0.123134 
 -0.882653 -0.866240 0.141791 
 -0.880102 -0.866240 0.190299 
 -0.877551 -0.866240 0.242537 
 -0.876276 -0.866240 0.264925 
 -0.875000 -0.866240 0.287313 
 -0.873724 -0.866240 0.309701 
 -0.885204 -0.866240 0.126866 
 -0.883929 -0.866240 0.123134 
 -0.882653 -0.866240 0.141791 
 -0.881378 -0.866240 0.164179 
 -0.878827 -0.866240 0.216418 
 -0.876276 -0.866240 0.264925 
 -0.875000 -0.866240 0.287313 
 -0.873724 -0.866240 0.309701 
 -0.872449 -0.866240 0.335821 
 -0.885204 -0.865659 0.141791 
 -0.883929 -0.865659 0.134328 
 -0.882653 -0.865659 0.145522 
 -0.881378 -0.865659 0.167910 
 -0.878827 -0.865659 0.220149 
 -0.876276 -0.865659 0.264925 
 -0.875000 -0.865659 0.287313 
 -0.873724 -0.865659 0.309701 
 -0.872449 -0.865659 0.328358 
 -0.885204 -0.865077 0.156716 
 -0.883929 -0.865077 0.149254 
 -0.882653 -0.865077 0.160448 
 -0.881378 -0.865077 0.179104 
 -0.878827 -0.865077 0.223881 
 -0.876276 -0.865077 0.268657 
 -0.875000 -0.865077 0.287313 
 -0.873724 -0.865077 0.305970 
 -0.872449 -0.865077 0.324627 
 -0.883929 -0.865077 0.149254 
 -0.882653 -0.865077 0.160448 
 -0.881378 -0.865077 0.179104 
 -0.880102 -0.865077 0.201493 
 -0.877551 -0.865077 0.246269 
 -0.875000 -0.865077 0.287313 
 -0.873724 -0.865077 0.305970 
 -0.872449 -0.865077 0.324627 
 -0.871173 -0.865077 0.343284 
 -0.883929 -0.864495 0.160448 
 -0.882653 -0.864495 0.167910 
 -0.881378 -0.864495 0.186567 
 -0.880102 -0.864495 0.205224 
 -0.877551 -0.864495 0.246269 
 -0.875000 -0.864495 0.287313 
 -0.873724 -0.864495 0.305970 
 -0.872449 -0.864495 0.324627 
 -0.871173 -0.864495 0.339552 
 -0.883929 -0.863914 0.171642 
 -0.882653 -0.863914 0.175373 
 -0.881378 -0.863914 0.190299 
 -0.880102 -0.863914 0.208955 
 -0.877551 -0.863914 0.250000 
 -0.875000 -0.863914 0.287313 
 -0.873724 -0.863914 0.302239 
 -0.872449 -0.863914 0.320896 
 -0.871173 -0.863914 0.339552 
 -0.883929 -0.863332 0.190299 
 -0.882653 -0.863332 0.190299 
 -0.881378 -0.863332 0.197761 
 -0.880102 -0.863332 0.216418 
 -0.877551 -0.863332 0.250000 
 -0.875000 -0.863332 0.287313 
 -0.873724 -0.863332 0.305970 
 -0.872449 -0.863332 0.324627 
 -0.871173 -0.863332 0.339552 
 -0.882653 -0.863332 0.190299 
 -0.881378 -0.863332 0.197761 
 -0.880102 -0.863332 0.216418 
 -0.878827 -0.863332 0.235075 
 -0.876276 -0.863332 0.272388 
 -0.873724 -0.863332 0.305970 
 -0.872449 -0.863332 0.324627 
 -0.871173 -0.863332 0.339552 
 -0.869898 -0.863332 0.358209 
 -0.882653 -0.862751 0.205224 
 -0.881378 -0.862751 0.205224 
 -0.880102 -0.862751 0.220149 
 -0.878827 -0.862751 0.238806 
 -0.876276 -0.862751 0.276119 
 -0.873724 -0.862751 0.309701 
 -0.872449 -0.862751 0.328358 
 -0.871173 -0.862751 0.343284 
 -0.869898 -0.862751 0.365672 
 -0.882653 -0.862169 0.231343 
 -0.881378 -0.862169 0.227612 
 -0.880102 -0.862169 0.231343 
 -0.878827 -0.862169 0.246269 
 -0.876276 -0.862169 0.283582 
 -0.873724 -0.862169 0.320896 
 -0.872449 -0.862169 0.339552 
 -0.871173 -0.862169 0.358209 
 -0.869898 -0.862169 0.380597 
 -0.881378 -0.862169 0.227612 
 -0.880102 -0.862169 0.231343 
 -0.878827 -0.862169 0.246269 
 -0.877551 -0.862169 0.264925 
 -0.875000 -0.862169 0.302239 
 -0.872449 -0.862169 0.339552 
 -0.871173 -0.862169 0.358209 
 -0.869898 -0.862169 0.380597 
 -0.868622 -0.862169 0.402985 
 -0.881378 -0.861588 0.246269 
 -0.880102 -0.861588 0.242537 
 -0.878827 -0.861588 0.253731 
 -0.877551 -0.861588 0.268657 
 -0.875000 -0.861588 0.305970 
 -0.872449 -0.861588 0.347015 
 -0.871173 -0.861588 0.369403 
 -0.869898 -0.861588 0.391791 
 -0.868622 -0.861588 0.414179 
 -0.881378 -0.861006 0.276119 
 -0.880102 -0.861006 0.264925 
 -0.878827 -0.861006 0.264925 
 -0.877551 -0.861006 0.279851 
 -0.875000 -0.861006 0.313433 
 -0.872449 -0.861006 0.354478 
 -0.871173 -0.861006 0.380597 
 -0.869898 -0.861006 0.406716 
 -0.868622 -0.861006 0.432836 
 -0.880102 -0.861006 0.264925 
 -0.878827 -0.861006 0.264925 
 -0.877551 -0.861006 0.279851 
 -0.876276 -0.861006 0.294776 
 -0.873724 -0.861006 0.332090 
 -0.871173 -0.861006 0.380597 
 -0.869898 -0.861006 0.406716 
 -0.868622 -0.861006 0.432836 
 -0.867347 -0.861006 0.458955 
 -0.880102 -0.860425 0.287313 
 -0.878827 -0.860425 0.279851 
 -0.877551 -0.860425 0.283582 
 -0.876276 -0.860425 0.298507 
 -0.873724 -0.860425 0.335821 
 -0.871173 -0.860425 0.384328 
 -0.869898 -0.860425 0.414179 
 -0.868622 -0.860425 0.440299 
 -0.867347 -0.860425 0.466418 
 -0.880102 -0.859843 0.313433 
 -0.878827 -0.859843 0.302239 
 -0.877551 -0.859843 0.298507 
 -0.876276 -0.859843 0.305970 
 -0.873724 -0.859843 0.339552 
 -0.871173 -0.859843 0.388060 
 -0.869898 -0.859843 0.417910 
 -0.868622 -0.859843 0.444030 
 -0.867347 -0.859843 0.473881 
 -0.878827 -0.859843 0.302239 
 -0.877551 -0.859843 0.298507 
 -0.876276 -0.859843 0.305970 
 -0.875000 -0.859843 0.324627 
 -0.872449 -0.859843 0.365672 
 -0.869898 -0.859843 0.417910 
 -0.868622 -0.859843 0.444030 
 -0.867347 -0.859843 0.473881 
 -0.866071 -0.859843 0.503731 
 -0.878827 -0.859261 0.320896 
 -0.877551 -0.859261 0.313433 
 -0.876276 -0.859261 0.313433 
 -0.875000 -0.859261 0.328358 
 -0.872449 -0.859261 0.365672 
 -0.869898 -0.859261 0.421642 
 -0.868622 -0.859261 0.447761 
 -0.867347 -0.859261 0.477612 
 -0.866071 -0.859261 0.507463 
 -0.878827 -0.858680 0.350746 
 -0.877551 -0.858680 0.339552 
 -0.876276 -0.858680 0.332090 
 -0.875000 -0.858680 0.335821 
 -0.872449 -0.858680 0.373134 
 -0.869898 -0.858680 0.421642 
 -0.868622 -0.858680 0.447761 
 -0.867347 -0.858680 0.477612 
 -0.866071 -0.858680 0.511194 
 -0.878827 -0.858098 0.373134 
 -0.877551 -0.858098 0.358209 
 -0.876276 -0.858098 0.343284 
 -0.875000 -0.858098 0.343284 
 -0.872449 -0.858098 0.376866 
 -0.869898 -0.858098 0.421642 
 -0.868622 -0.858098 0.447761 
 -0.867347 -0.858098 0.481343 
 -0.866071 -0.858098 0.514925 
 -0.877551 -0.858098 0.358209 
 -0.876276 -0.858098 0.343284 
 -0.875000 -0.858098 0.343284 
 -0.873724 -0.858098 0.354478 
 -0.871173 -0.858098 0.395522 
 -0.868622 -0.858098 0.447761 
 -0.867347 -0.858098 0.481343 
 -0.866071 -0.858098 0.514925 
 -0.864796 -0.858098 0.544776 
 -0.877551 -0.857517 0.391791 
 -0.876276 -0.857517 0.380597 
 -0.875000 -0.857517 0.365672 
 -0.873724 -0.857517 0.365672 
 -0.871173 -0.857517 0.399254 
 -0.868622 -0.857517 0.451493 
 -0.867347 -0.857517 0.485075 
 -0.866071 -0.857517 0.518657 
 -0.864796 -0.857517 0.552239 
 -0.877551 -0.856935 0.414179 
 -0.876276 -0.856935 0.402985 
 -0.875000 -0.856935 0.388060 
 -0.873724 -0.856935 0.380597 
 -0.871173 -0.856935 0.399254 
 -0.868622 -0.856935 0.451493 
 -0.867347 -0.856935 0.485075 
 -0.866071 -0.856935 0.522388 
 -0.864796 -0.856935 0.555970 
 -0.876276 -0.856935 0.402985 
 -0.875000 -0.856935 0.388060 
 -0.873724 -0.856935 0.380597 
 -0.872449 -0.856935 0.380597 
 -0.869898 -0.856935 0.425373 
 -0.867347 -0.856935 0.485075 
 -0.866071 -0.856935 0.522388 
 -0.864796 -0.856935 0.555970 
 -0.863520 -0.856935 0.585821 
 -0.876276 -0.856354 0.429104 
 -0.875000 -0.856354 0.417910 
 -0.873724 -0.856354 0.406716 
 -0.872449 -0.856354 0.402985 
 -0.869898 -0.856354 0.425373 
 -0.867347 -0.856354 0.488806 
 -0.866071 -0.856354 0.529851 
 -0.864796 -0.856354 0.559701 
 -0.863520 -0.856354 0.593284 
 -0.876276 -0.855772 0.451493 
 -0.875000 -0.855772 0.432836 
 -0.873724 -0.855772 0.425373 
 -0.872449 -0.855772 0.414179 
 -0.869898 -0.855772 0.421642 
 -0.867347 -0.855772 0.492537 
 -0.866071 -0.855772 0.529851 
 -0.864796 -0.855772 0.563433 
 -0.863520 -0.855772 0.597015 
 -0.875000 -0.855772 0.432836 
 -0.873724 -0.855772 0.425373 
 -0.872449 -0.855772 0.414179 
 -0.871173 -0.855772 0.410448 
 -0.868622 -0.855772 0.455224 
 -0.866071 -0.855772 0.529851 
 -0.864796 -0.855772 0.563433 
 -0.863520 -0.855772 0.597015 
 -0.862245 -0.855772 0.626866 
 -0.875000 -0.855190 0.458955 
 -0.873724 -0.855190 0.440299 
 -0.872449 -0.855190 0.432836 
 -0.871173 -0.855190 0.425373 
 -0.868622 -0.855190 0.455224 
 -0.866071 -0.855190 0.533582 
 -0.864796 -0.855190 0.567164 
 -0.863520 -0.855190 0.600746 
 -0.862245 -0.855190 0.630597 
 -0.875000 -0.854609 0.492537 
 -0.873724 -0.854609 0.477612 
 -0.872449 -0.854609 0.462687 
 -0.871173 -0.854609 0.451493 
 -0.868622 -0.854609 0.462687 
 -0.866071 -0.854609 0.541045 
 -0.864796 -0.854609 0.574627 
 -0.863520 -0.854609 0.608209 
 -0.862245 -0.854609 0.634328 
 -0.875000 -0.854027 0.511194 
 -0.873724 -0.854027 0.496269 
 -0.872449 -0.854027 0.481343 
 -0.871173 -0.854027 0.470149 
 -0.868622 -0.854027 0.473881 
 -0.866071 -0.854027 0.544776 
 -0.864796 -0.854027 0.578358 
 -0.863520 -0.854027 0.611940 
 -0.862245 -0.854027 0.634328 
 -0.873724 -0.854027 0.496269 
 -0.872449 -0.854027 0.481343 
 -0.871173 -0.854027 0.470149 
 -0.869898 -0.854027 0.470149 
 -0.867347 -0.854027 0.507463 
 -0.864796 -0.854027 0.578358 
 -0.863520 -0.854027 0.611940 
 -0.862245 -0.854027 0.634328 
 -0.860969 -0.854027 0.660448 
 -0.873724 -0.853446 0.518657 
 -0.872449 -0.853446 0.503731 
 -0.871173 -0.853446 0.500000 
 -0.869898 -0.853446 0.503731 
 -0.867347 -0.853446 0.522388 
 -0.864796 -0.853446 0.585821 
 -0.863520 -0.853446 0.619403 
 -0.862245 -0.853446 0.638060 
 -0.860969 -0.853446 0.667910 
 -0.873724 -0.852864 0.533582 
 -0.872449 -0.852864 0.518657 
 -0.871173 -0.852864 0.522388 
 -0.869898 -0.852864 0.529851 
 -0.867347 -0.852864 0.544776 
 -0.864796 -0.852864 0.593284 
 -0.863520 -0.852864 0.623134 
 -0.862245 -0.852864 0.641791 
 -0.860969 -0.852864 0.675373 
 -0.872449 -0.852864 0.518657 
 -0.871173 -0.852864 0.522388 
 -0.869898 -0.852864 0.529851 
 -0.868622 -0.852864 0.537313 
 -0.866071 -0.852864 0.555970 
 -0.863520 -0.852864 0.623134 
 -0.862245 -0.852864 0.641791 
 -0.860969 -0.852864 0.675373 
 -0.859694 -0.852864 0.708955 
 -0.872449 -0.852283 0.563433 
 -0.871173 -0.852283 0.567164 
 -0.869898 -0.852283 0.574627 
 -0.868622 -0.852283 0.578358 
 -0.866071 -0.852283 0.585821 
 -0.863520 -0.852283 0.626866 
 -0.862245 -0.852283 0.649254 
 -0.860969 -0.852283 0.682836 
 -0.859694 -0.852283 0.720149 
 -0.872449 -0.851701 0.593284 
 -0.871173 -0.851701 0.597015 
 -0.869898 -0.851701 0.604478 
 -0.868622 -0.851701 0.604478 
 -0.866071 -0.851701 0.611940 
 -0.863520 -0.851701 0.630597 
 -0.862245 -0.851701 0.656716 
 -0.860969 -0.851701 0.686567 
 -0.859694 -0.851701 0.723881 
 -0.871173 -0.851701 0.597015 
 -0.869898 -0.851701 0.604478 
 -0.868622 -0.851701 0.604478 
 -0.867347 -0.851701 0.608209 
 -0.864796 -0.851701 0.615672 
 -0.862245 -0.851701 0.656716 
 -0.860969 -0.851701 0.686567 
 -0.859694 -0.851701 0.723881 
 -0.858418 -0.851701 0.742537 
 -0.871173 -0.851120 0.634328 
 -0.869898 -0.851120 0.641791 
 -0.868622 -0.851120 0.649254 
 -0.867347 -0.851120 0.649254 
 -0.864796 -0.851120 0.652985 
 -0.862245 -0.851120 0.664179 
 -0.860969 -0.851120 0.690299 
 -0.859694 -0.851120 0.727612 
 -0.858418 -0.851120 0.750000 
 -0.871173 -0.850538 0.656716 
 -0.869898 -0.850538 0.664179 
 -0.868622 -0.850538 0.671642 
 -0.867347 -0.850538 0.679104 
 -0.864796 -0.850538 0.679104 
 -0.862245 -0.850538 0.679104 
 -0.860969 -0.850538 0.690299 
 -0.859694 -0.850538 0.727612 
 -0.858418 -0.850538 0.757463 
 -0.869898 -0.850538 0.664179 
 -0.868622 -0.850538 0.671642 
 -0.867347 -0.850538 0.679104 
 -0.866071 -0.850538 0.679104 
 -0.863520 -0.850538 0.679104 
 -0.860969 -0.850538 0.690299 
 -0.859694 -0.850538 0.727612 
 -0.858418 -0.850538 0.757463 
 -0.857143 -0.850538 0.779851 
 -0.869898 -0.849956 0.694030 
 -0.868622 -0.849956 0.705224 
 -0.867347 -0.849956 0.716418 
 -0.866071 -0.849956 0.720149 
 -0.863520 -0.849956 0.723881 
 -0.860969 -0.849956 0.723881 
 -0.859694 -0.849956 0.738806 
 -0.858418 -0.849956 0.764925 
 -0.857143 -0.849956 0.791045 
 -0.869898 -0.849375 0.712687 
 -0.868622 -0.849375 0.720149 
 -0.867347 -0.849375 0.727612 
 -0.866071 -0.849375 0.735075 
 -0.863520 -0.849375 0.738806 
 -0.860969 -0.849375 0.746269 
 -0.859694 -0.849375 0.757463 
 -0.858418 -0.849375 0.779851 
 -0.857143 -0.849375 0.802239 
 -0.869898 -0.848793 0.720149 
 -0.868622 -0.848793 0.731343 
 -0.867347 -0.848793 0.738806 
 -0.866071 -0.848793 0.750000 
 -0.863520 -0.848793 0.761194 
 -0.860969 -0.848793 0.776119 
 -0.859694 -0.848793 0.794776 
 -0.858418 -0.848793 0.805970 
 -0.857143 -0.848793 0.820896 
 -0.868622 -0.848793 0.731343 
 -0.867347 -0.848793 0.738806 
 -0.866071 -0.848793 0.750000 
 -0.864796 -0.848793 0.757463 
 -0.862245 -0.848793 0.768657 
 -0.859694 -0.848793 0.794776 
 -0.858418 -0.848793 0.805970 
 -0.857143 -0.848793 0.820896 
 -0.855867 -0.848793 0.839552 
 -0.868622 -0.848212 0.735075 
 -0.867347 -0.848212 0.746269 
 -0.866071 -0.848212 0.757463 
 -0.864796 -0.848212 0.764925 
 -0.862245 -0.848212 0.783582 
 -0.859694 -0.848212 0.813433 
 -0.858418 -0.848212 0.820896 
 -0.857143 -0.848212 0.835821 
 -0.855867 -0.848212 0.850746 
 -0.868622 -0.847630 0.731343 
 -0.867347 -0.847630 0.742537 
 -0.866071 -0.847630 0.757463 
 -0.864796 -0.847630 0.768657 
 -0.862245 -0.847630 0.794776 
 -0.859694 -0.847630 0.820896 
 -0.858418 -0.847630 0.832090 
 -0.857143 -0.847630 0.847015 
 -0.855867 -0.847630 0.865672 
 -0.867347 -0.847630 0.742537 
 -0.866071 -0.847630 0.757463 
 -0.864796 -0.847630 0.768657 
 -0.863520 -0.847630 0.783582 
 -0.860969 -0.847630 0.809701 
 -0.858418 -0.847630 0.832090 
 -0.857143 -0.847630 0.847015 
 -0.855867 -0.847630 0.865672 
 -0.854592 -0.847630 0.876866 
 -0.867347 -0.847049 0.738806 
 -0.866071 -0.847049 0.750000 
 -0.864796 -0.847049 0.764925 
 -0.863520 -0.847049 0.779851 
 -0.860969 -0.847049 0.805970 
 -0.858418 -0.847049 0.835821 
 -0.857143 -0.847049 0.847015 
 -0.855867 -0.847049 0.865672 
 -0.854592 -0.847049 0.869403 
 -0.867347 -0.846467 0.731343 
 -0.866071 -0.846467 0.746269 
 -0.864796 -0.846467 0.757463 
 -0.863520 -0.846467 0.772388 
 -0.860969 -0.846467 0.802239 
 -0.858418 -0.846467 0.832090 
 -0.857143 -0.846467 0.843284 
 -0.855867 -0.846467 0.854478 
 -0.854592 -0.846467 0.861940 
 -0.866071 -0.846467 0.746269 
 -0.864796 -0.846467 0.757463 
 -0.863520 -0.846467 0.772388 
 -0.862245 -0.846467 0.787313 
 -0.859694 -0.846467 0.817164 
 -0.857143 -0.846467 0.843284 
 -0.855867 -0.846467 0.854478 
 -0.854592 -0.846467 0.861940 
 -0.853316 -0.846467 0.832090 
 -0.866071 -0.845885 0.735075 
 -0.864796 -0.845885 0.746269 
 -0.863520 -0.845885 0.761194 
 -0.862245 -0.845885 0.776119 
 -0.859694 -0.845885 0.805970 
 -0.857143 -0.845885 0.828358 
 -0.855867 -0.845885 0.835821 
 -0.854592 -0.845885 0.835821 
 -0.853316 -0.845885 0.817164 
 -0.866071 -0.845304 0.727612 
 -0.864796 -0.845304 0.738806 
 -0.863520 -0.845304 0.753731 
 -0.862245 -0.845304 0.768657 
 -0.859694 -0.845304 0.798507 
 -0.857143 -0.845304 0.820896 
 -0.855867 -0.845304 0.820896 
 -0.854592 -0.845304 0.813433 
 -0.853316 -0.845304 0.798507 
 -0.864796 -0.845304 0.738806 
 -0.863520 -0.845304 0.753731 
 -0.862245 -0.845304 0.768657 
 -0.860969 -0.845304 0.783582 
 -0.858418 -0.845304 0.813433 
 -0.855867 -0.845304 0.820896 
 -0.854592 -0.845304 0.813433 
 -0.853316 -0.845304 0.798507 
 -0.852041 -0.845304 0.776119 
 -0.864796 -0.844722 0.727612 
 -0.863520 -0.844722 0.742537 
 -0.862245 -0.844722 0.757463 
 -0.860969 -0.844722 0.772388 
 -0.858418 -0.844722 0.791045 
 -0.855867 -0.844722 0.794776 
 -0.854592 -0.844722 0.783582 
 -0.853316 -0.844722 0.772388 
 -0.852041 -0.844722 0.753731 
 -0.864796 -0.844141 0.720149 
 -0.863520 -0.844141 0.735075 
 -0.862245 -0.844141 0.750000 
 -0.860969 -0.844141 0.764925 
 -0.858418 -0.844141 0.772388 
 -0.855867 -0.844141 0.768657 
 -0.854592 -0.844141 0.761194 
 -0.853316 -0.844141 0.753731 
 -0.852041 -0.844141 0.738806 
 -0.864796 -0.843559 0.705224 
 -0.863520 -0.843559 0.723881 
 -0.862245 -0.843559 0.738806 
 -0.860969 -0.843559 0.746269 
 -0.858418 -0.843559 0.746269 
 -0.855867 -0.843559 0.735075 
 -0.854592 -0.843559 0.727612 
 -0.853316 -0.843559 0.720149 
 -0.852041 -0.843559 0.705224 
 -0.863520 -0.843559 0.723881 
 -0.862245 -0.843559 0.738806 
 -0.860969 -0.843559 0.746269 
 -0.859694 -0.843559 0.750000 
 -0.857143 -0.843559 0.742537 
 -0.854592 -0.843559 0.727612 
 -0.853316 -0.843559 0.720149 
 -0.852041 -0.843559 0.705224 
 -0.850765 -0.843559 0.679104 
 -0.863520 -0.842978 0.716418 
 -0.862245 -0.842978 0.727612 
 -0.860969 -0.842978 0.735075 
 -0.859694 -0.842978 0.738806 
 -0.857143 -0.842978 0.723881 
 -0.854592 -0.842978 0.705224 
 -0.853316 -0.842978 0.690299 
 -0.852041 -0.842978 0.671642 
 -0.850765 -0.842978 0.649254 
 -0.863520 -0.842396 0.701493 
 -0.862245 -0.842396 0.712687 
 -0.860969 -0.842396 0.720149 
 -0.859694 -0.842396 0.716418 
 -0.857143 -0.842396 0.694030 
 -0.854592 -0.842396 0.664179 
 -0.853316 -0.842396 0.645522 
 -0.852041 -0.842396 0.630597 
 -0.850765 -0.842396 0.615672 
 -0.862245 -0.842396 0.712687 
 -0.860969 -0.842396 0.720149 
 -0.859694 -0.842396 0.716418 
 -0.858418 -0.842396 0.705224 
 -0.855867 -0.842396 0.679104 
 -0.853316 -0.842396 0.645522 
 -0.852041 -0.842396 0.630597 
 -0.850765 -0.842396 0.615672 
 -0.849490 -0.842396 0.600746 
 -0.862245 -0.841814 0.701493 
 -0.860969 -0.841814 0.705224 
 -0.859694 -0.841814 0.697761 
 -0.858418 -0.841814 0.686567 
 -0.855867 -0.841814 0.652985 
 -0.853316 -0.841814 0.623134 
 -0.852041 -0.841814 0.611940 
 -0.850765 -0.841814 0.597015 
 -0.849490 -0.841814 0.585821 
 -0.862245 -0.841233 0.686567 
 -0.860969 -0.841233 0.686567 
 -0.859694 -0.841233 0.675373 
 -0.858418 -0.841233 0.660448 
 -0.855867 -0.841233 0.619403 
 -0.853316 -0.841233 0.597015 
 -0.852041 -0.841233 0.585821 
 -0.850765 -0.841233 0.574627 
 -0.849490 -0.841233 0.563433 
 -0.860969 -0.841233 0.686567 
 -0.859694 -0.841233 0.675373 
 -0.858418 -0.841233 0.660448 
 -0.857143 -0.841233 0.641791 
 -0.854592 -0.841233 0.608209 
 -0.852041 -0.841233 0.585821 
 -0.850765 -0.841233 0.574627 
 -0.849490 -0.841233 0.563433 
 -0.848214 -0.841233 0.552239 
 -0.860969 -0.840651 0.671642 
 -0.859694 -0.840651 0.664179 
 -0.858418 -0.840651 0.645522 
 -0.857143 -0.840651 0.626866 
 -0.854592 -0.840651 0.593284 
 -0.852041 -0.840651 0.567164 
 -0.850765 -0.840651 0.555970 
 -0.849490 -0.840651 0.544776 
 -0.848214 -0.840651 0.537313 
 -0.860969 -0.840070 0.652985 
 -0.859694 -0.840070 0.645522 
 -0.858418 -0.840070 0.630597 
 -0.857143 -0.840070 0.604478 
 -0.854592 -0.840070 0.567164 
 -0.852041 -0.840070 0.541045 
 -0.850765 -0.840070 0.529851 
 -0.849490 -0.840070 0.522388 
 -0.848214 -0.840070 0.518657 
 -0.859694 -0.840070 0.645522 
 -0.858418 -0.840070 0.630597 
 -0.857143 -0.840070 0.604478 
 -0.855867 -0.840070 0.585821 
 -0.853316 -0.840070 0.552239 
 -0.850765 -0.840070 0.529851 
 -0.849490 -0.840070 0.522388 
 -0.848214 -0.840070 0.518657 
 -0.846939 -0.840070 0.526119 
 -0.859694 -0.839488 0.630597 
 -0.858418 -0.839488 0.615672 
 -0.857143 -0.839488 0.589552 
 -0.855867 -0.839488 0.567164 
 -0.853316 -0.839488 0.533582 
 -0.850765 -0.839488 0.518657 
 -0.849490 -0.839488 0.511194 
 -0.848214 -0.839488 0.511194 
 -0.846939 -0.839488 0.522388 
 -0.859694 -0.838907 0.600746 
 -0.858418 -0.838907 0.578358 
 -0.857143 -0.838907 0.555970 
 -0.855867 -0.838907 0.533582 
 -0.853316 -0.838907 0.514925 
 -0.850765 -0.838907 0.496269 
 -0.849490 -0.838907 0.492537 
 -0.848214 -0.838907 0.496269 
 -0.846939 -0.838907 0.514925 
 -0.858418 -0.838907 0.578358 
 -0.857143 -0.838907 0.555970 
 -0.855867 -0.838907 0.533582 
 -0.854592 -0.838907 0.522388 
 -0.852041 -0.838907 0.507463 
 -0.849490 -0.838907 0.492537 
 -0.848214 -0.838907 0.496269 
 -0.846939 -0.838907 0.514925 
 -0.845663 -0.838907 0.529851 
 -0.858418 -0.838325 0.555970 
 -0.857143 -0.838325 0.529851 
 -0.855867 -0.838325 0.518657 
 -0.854592 -0.838325 0.511194 
 -0.852041 -0.838325 0.492537 
 -0.849490 -0.838325 0.481343 
 -0.848214 -0.838325 0.488806 
 -0.846939 -0.838325 0.511194 
 -0.845663 -0.838325 0.529851 
 -0.858418 -0.837744 0.537313 
 -0.857143 -0.837744 0.522388 
 -0.855867 -0.837744 0.507463 
 -0.854592 -0.837744 0.496269 
 -0.852041 -0.837744 0.477612 
 -0.849490 -0.837744 0.473881 
 -0.848214 -0.837744 0.485075 
 -0.846939 -0.837744 0.503731 
 -0.845663 -0.837744 0.522388 
 -0.858418 -0.837162 0.514925 
 -0.857143 -0.837162 0.503731 
 -0.855867 -0.837162 0.488806 
 -0.854592 -0.837162 0.481343 
 -0.852041 -0.837162 0.458955 
 -0.849490 -0.837162 0.462687 
 -0.848214 -0.837162 0.481343 
 -0.846939 -0.837162 0.500000 
 -0.845663 -0.837162 0.522388 
 -0.857143 -0.837162 0.503731 
 -0.855867 -0.837162 0.488806 
 -0.854592 -0.837162 0.481343 
 -0.853316 -0.837162 0.470149 
 -0.850765 -0.837162 0.455224 
 -0.848214 -0.837162 0.481343 
 -0.846939 -0.837162 0.500000 
 -0.845663 -0.837162 0.522388 
 -0.844388 -0.837162 0.541045 
 -0.857143 -0.836580 0.488806 
 -0.855867 -0.836580 0.477612 
 -0.854592 -0.836580 0.466418 
 -0.853316 -0.836580 0.455224 
 -0.850765 -0.836580 0.440299 
 -0.848214 -0.836580 0.477612 
 -0.846939 -0.836580 0.500000 
 -0.845663 -0.836580 0.518657 
 -0.844388 -0.836580 0.537313 
 -0.857143 -0.835999 0.470149 
 -0.855867 -0.835999 0.458955 
 -0.854592 -0.835999 0.447761 
 -0.853316 -0.835999 0.436567 
 -0.850765 -0.835999 0.432836 
 -0.848214 -0.835999 0.473881 
 -0.846939 -0.835999 0.496269 
 -0.845663 -0.835999 0.518657 
 -0.844388 -0.835999 0.541045 
 -0.855867 -0.835999 0.458955 
 -0.854592 -0.835999 0.447761 
 -0.853316 -0.835999 0.436567 
 -0.852041 -0.835999 0.429104 
 -0.849490 -0.835999 0.451493 
 -0.846939 -0.835999 0.496269 
 -0.845663 -0.835999 0.518657 
 -0.844388 -0.835999 0.541045 
 -0.843112 -0.835999 0.559701 
 -0.855867 -0.835417 0.444030 
 -0.854592 -0.835417 0.436567 
 -0.853316 -0.835417 0.425373 
 -0.852041 -0.835417 0.421642 
 -0.849490 -0.835417 0.447761 
 -0.846939 -0.835417 0.496269 
 -0.845663 -0.835417 0.522388 
 -0.844388 -0.835417 0.544776 
 -0.843112 -0.835417 0.559701 
 -0.855867 -0.834836 0.429104 
 -0.854592 -0.834836 0.417910 
 -0.853316 -0.834836 0.414179 
 -0.852041 -0.834836 0.410448 
 -0.849490 -0.834836 0.440299 
 -0.846939 -0.834836 0.492537 
 -0.845663 -0.834836 0.518657 
 -0.844388 -0.834836 0.541045 
 -0.843112 -0.834836 0.555970 
 -0.854592 -0.834836 0.417910 
 -0.853316 -0.834836 0.414179 
 -0.852041 -0.834836 0.410448 
 -0.850765 -0.834836 0.421642 
 -0.848214 -0.834836 0.466418 
 -0.845663 -0.834836 0.518657 
 -0.844388 -0.834836 0.541045 
 -0.843112 -0.834836 0.555970 
 -0.841837 -0.834836 0.574627 
 -0.854592 -0.834254 0.410448 
 -0.853316 -0.834254 0.402985 
 -0.852041 -0.834254 0.402985 
 -0.850765 -0.834254 0.417910 
 -0.848214 -0.834254 0.458955 
 -0.845663 -0.834254 0.511194 
 -0.844388 -0.834254 0.533582 
 -0.843112 -0.834254 0.548507 
 -0.841837 -0.834254 0.567164 
 -0.854592 -0.833673 0.395522 
 -0.853316 -0.833673 0.388060 
 -0.852041 -0.833673 0.391791 
 -0.850765 -0.833673 0.410448 
 -0.848214 -0.833673 0.451493 
 -0.845663 -0.833673 0.496269 
 -0.844388 -0.833673 0.518657 
 -0.843112 -0.833673 0.537313 
 -0.841837 -0.833673 0.552239 
 -0.853316 -0.833673 0.388060 
 -0.852041 -0.833673 0.391791 
 -0.850765 -0.833673 0.410448 
 -0.849490 -0.833673 0.429104 
 -0.846939 -0.833673 0.473881 
 -0.844388 -0.833673 0.518657 
 -0.843112 -0.833673 0.537313 
 -0.841837 -0.833673 0.552239 
 -0.840561 -0.833673 0.567164 
 -0.853316 -0.833091 0.380597 
 -0.852041 -0.833091 0.388060 
 -0.850765 -0.833091 0.406716 
 -0.849490 -0.833091 0.425373 
 -0.846939 -0.833091 0.462687 
 -0.844388 -0.833091 0.503731 
 -0.843112 -0.833091 0.526119 
 -0.841837 -0.833091 0.541045 
 -0.840561 -0.833091 0.555970 
 -0.853316 -0.832509 0.365672 
 -0.852041 -0.832509 0.376866 
 -0.850765 -0.832509 0.395522 
 -0.849490 -0.832509 0.414179 
 -0.846939 -0.832509 0.444030 
 -0.844388 -0.832509 0.481343 
 -0.843112 -0.832509 0.503731 
 -0.841837 -0.832509 0.526119 
 -0.840561 -0.832509 0.541045 
 -0.852041 -0.832509 0.376866 
 -0.850765 -0.832509 0.395522 
 -0.849490 -0.832509 0.414179 
 -0.848214 -0.832509 0.429104 
 -0.845663 -0.832509 0.462687 
 -0.843112 -0.832509 0.503731 
 -0.841837 -0.832509 0.526119 
 -0.840561 -0.832509 0.541045 
 -0.839286 -0.832509 0.555970 
 -0.852041 -0.831928 0.373134 
 -0.850765 -0.831928 0.391791 
 -0.849490 -0.831928 0.406716 
 -0.848214 -0.831928 0.417910 
 -0.845663 -0.831928 0.447761 
 -0.843112 -0.831928 0.488806 
 -0.841837 -0.831928 0.511194 
 -0.840561 -0.831928 0.529851 
 -0.839286 -0.831928 0.544776 
 -0.852041 -0.831346 0.369403 
 -0.850765 -0.831346 0.384328 
 -0.849490 -0.831346 0.399254 
 -0.848214 -0.831346 0.410448 
 -0.845663 -0.831346 0.432836 
 -0.843112 -0.831346 0.473881 
 -0.841837 -0.831346 0.492537 
 -0.840561 -0.831346 0.511194 
 -0.839286 -0.831346 0.529851 
 -0.850765 -0.830765 0.380597 
 -0.849490 -0.830765 0.391791 
 -0.848214 -0.830765 0.406716 
 -0.846939 -0.830765 0.417910 
 -0.844388 -0.830765 0.444030 
 -0.841837 -0.830765 0.485075 
 -0.840561 -0.830765 0.503731 
 -0.839286 -0.830765 0.518657 
 -0.838010 -0.830765 0.533582 
 -0.850765 -0.830183 0.384328 
 -0.849490 -0.830183 0.399254 
 -0.848214 -0.830183 0.410448 
 -0.846939 -0.830183 0.425373 
 -0.844388 -0.830183 0.455224 
 -0.841837 -0.830183 0.481343 
 -0.840561 -0.830183 0.496269 
 -0.839286 -0.830183 0.511194 
 -0.838010 -0.830183 0.526119 
 -0.850765 -0.829602 0.391791 
 -0.849490 -0.829602 0.402985 
 -0.848214 -0.829602 0.417910 
 -0.846939 -0.829602 0.429104 
 -0.844388 -0.829602 0.458955 
 -0.841837 -0.829602 0.488806 
 -0.840561 -0.829602 0.503731 
 -0.839286 -0.829602 0.518657 
 -0.838010 -0.829602 0.529851 
 -0.849490 -0.829602 0.402985 
 -0.848214 -0.829602 0.417910 
 -0.846939 -0.829602 0.429104 
 -0.845663 -0.829602 0.440299 
 -0.843112 -0.829602 0.473881 
 -0.840561 -0.829602 0.503731 
 -0.839286 -0.829602 0.518657 
 -0.838010 -0.829602 0.529851 
 -0.836735 -0.829602 0.544776 
 -0.849490 -0.829020 0.410448 
 -0.848214 -0.829020 0.421642 
 -0.846939 -0.829020 0.436567 
 -0.845663 -0.829020 0.451493 
 -0.843112 -0.829020 0.485075 
 -0.840561 -0.829020 0.518657 
 -0.839286 -0.829020 0.533582 
 -0.838010 -0.829020 0.544776 
 -0.836735 -0.829020 0.559701 
 -0.849490 -0.828438 0.417910 
 -0.848214 -0.828438 0.429104 
 -0.846939 -0.828438 0.444030 
 -0.845663 -0.828438 0.462687 
 -0.843112 -0.828438 0.496269 
 -0.840561 -0.828438 0.529851 
 -0.839286 -0.828438 0.541045 
 -0.838010 -0.828438 0.552239 
 -0.836735 -0.828438 0.570896 
 -0.848214 -0.828438 0.429104 
 -0.846939 -0.828438 0.444030 
 -0.845663 -0.828438 0.462687 
 -0.844388 -0.828438 0.477612 
 -0.841837 -0.828438 0.511194 
 -0.839286 -0.828438 0.541045 
 -0.838010 -0.828438 0.552239 
 -0.836735 -0.828438 0.570896 
 -0.835459 -0.828438 0.585821 
 -0.848214 -0.827857 0.436567 
 -0.846939 -0.827857 0.451493 
 -0.845663 -0.827857 0.470149 
 -0.844388 -0.827857 0.485075 
 -0.841837 -0.827857 0.522388 
 -0.839286 -0.827857 0.548507 
 -0.838010 -0.827857 0.567164 
 -0.836735 -0.827857 0.582090 
 -0.835459 -0.827857 0.597015 
 -0.848214 -0.827275 0.447761 
 -0.846939 -0.827275 0.462687 
 -0.845663 -0.827275 0.477612 
 -0.844388 -0.827275 0.492537 
 -0.841837 -0.827275 0.529851 
 -0.839286 -0.827275 0.563433 
 -0.838010 -0.827275 0.582090 
 -0.836735 -0.827275 0.600746 
 -0.835459 -0.827275 0.615672 
 -0.846939 -0.827275 0.462687 
 -0.845663 -0.827275 0.477612 
 -0.844388 -0.827275 0.492537 
 -0.843112 -0.827275 0.511194 
 -0.840561 -0.827275 0.544776 
 -0.838010 -0.827275 0.582090 
 -0.836735 -0.827275 0.600746 
 -0.835459 -0.827275 0.615672 
 -0.834184 -0.827275 0.634328 
 -0.846939 -0.826694 0.473881 
 -0.845663 -0.826694 0.485075 
 -0.844388 -0.826694 0.496269 
 -0.843112 -0.826694 0.511194 
 -0.840561 -0.826694 0.544776 
 -0.838010 -0.826694 0.589552 
 -0.836735 -0.826694 0.608209 
 -0.835459 -0.826694 0.630597 
 -0.834184 -0.826694 0.649254 
 -0.846939 -0.826112 0.500000 
 -0.845663 -0.826112 0.511194 
 -0.844388 -0.826112 0.518657 
 -0.843112 -0.826112 0.522388 
 -0.840561 -0.826112 0.552239 
 -0.838010 -0.826112 0.597015 
 -0.836735 -0.826112 0.619403 
 -0.835459 -0.826112 0.641791 
 -0.834184 -0.826112 0.656716 
 -0.845663 -0.826112 0.511194 
 -0.844388 -0.826112 0.518657 
 -0.843112 -0.826112 0.522388 
 -0.841837 -0.826112 0.533582 
 -0.839286 -0.826112 0.574627 
 -0.836735 -0.826112 0.619403 
 -0.835459 -0.826112 0.641791 
 -0.834184 -0.826112 0.656716 
 -0.832908 -0.826112 0.667910 
 -0.845663 -0.825531 0.533582 
 -0.844388 -0.825531 0.537313 
 -0.843112 -0.825531 0.541045 
 -0.841837 -0.825531 0.548507 
 -0.839286 -0.825531 0.582090 
 -0.836735 -0.825531 0.623134 
 -0.835459 -0.825531 0.645522 
 -0.834184 -0.825531 0.656716 
 -0.832908 -0.825531 0.664179 
 -0.845663 -0.824949 0.552239 
 -0.844388 -0.824949 0.563433 
 -0.843112 -0.824949 0.570896 
 -0.841837 -0.824949 0.574627 
 -0.839286 -0.824949 0.589552 
 -0.836735 -0.824949 0.626866 
 -0.835459 -0.824949 0.645522 
 -0.834184 -0.824949 0.645522 
 -0.832908 -0.824949 0.634328 
 -0.844388 -0.824949 0.563433 
 -0.843112 -0.824949 0.570896 
 -0.841837 -0.824949 0.574627 
 -0.840561 -0.824949 0.578358 
 -0.838010 -0.824949 0.608209 
 -0.835459 -0.824949 0.645522 
 -0.834184 -0.824949 0.645522 
 -0.832908 -0.824949 0.634328 
 -0.831633 -0.824949 0.608209 
 -0.844388 -0.824368 0.578358 
 -0.843112 -0.824368 0.589552 
 -0.841837 -0.824368 0.593284 
 -0.840561 -0.824368 0.593284 
 -0.838010 -0.824368 0.611940 
 -0.835459 -0.824368 0.645522 
 -0.834184 -0.824368 0.645522 
 -0.832908 -0.824368 0.615672 
 -0.831633 -0.824368 0.589552 
 -0.844388 -0.823786 0.600746 
 -0.843112 -0.823786 0.615672 
 -0.841837 -0.823786 0.619403 
 -0.840561 -0.823786 0.619403 
 -0.838010 -0.823786 0.630597 
 -0.835459 -0.823786 0.645522 
 -0.834184 -0.823786 0.623134 
 -0.832908 -0.823786 0.589552 
 -0.831633 -0.823786 0.555970 
 -0.843112 -0.823786 0.615672 
 -0.841837 -0.823786 0.619403 
 -0.840561 -0.823786 0.619403 
 -0.839286 -0.823786 0.623134 
 -0.836735 -0.823786 0.645522 
 -0.834184 -0.823786 0.623134 
 -0.832908 -0.823786 0.589552 
 -0.831633 -0.823786 0.555970 
 -0.830357 -0.823786 0.529851 
 -0.843112 -0.823204 0.630597 
 -0.841837 -0.823204 0.634328 
 -0.840561 -0.823204 0.638060 
 -0.839286 -0.823204 0.638060 
 -0.836735 -0.823204 0.645522 
 -0.834184 -0.823204 0.615672 
 -0.832908 -0.823204 0.574627 
 -0.831633 -0.823204 0.533582 
 -0.830357 -0.823204 0.507463 
 -0.843112 -0.822623 0.645522 
 -0.841837 -0.822623 0.656716 
 -0.840561 -0.822623 0.660448 
 -0.839286 -0.822623 0.660448 
 -0.836735 -0.822623 0.664179 
 -0.834184 -0.822623 0.611940 
 -0.832908 -0.822623 0.574627 
 -0.831633 -0.822623 0.537313 
 -0.830357 -0.822623 0.507463 
 -0.843112 -0.822041 0.660448 
 -0.841837 -0.822041 0.679104 
 -0.840561 -0.822041 0.679104 
 -0.839286 -0.822041 0.679104 
 -0.836735 -0.822041 0.675373 
 -0.834184 -0.822041 0.615672 
 -0.832908 -0.822041 0.578358 
 -0.831633 -0.822041 0.544776 
 -0.830357 -0.822041 0.514925 
 -0.841837 -0.822041 0.679104 
 -0.840561 -0.822041 0.679104 
 -0.839286 -0.822041 0.679104 
 -0.838010 -0.822041 0.679104 
 -0.835459 -0.822041 0.645522 
 -0.832908 -0.822041 0.578358 
 -0.831633 -0.822041 0.544776 
 -0.830357 -0.822041 0.514925 
 -0.829082 -0.822041 0.485075 
 -0.841837 -0.821460 0.697761 
 -0.840561 -0.821460 0.705224 
 -0.839286 -0.821460 0.701493 
 -0.838010 -0.821460 0.697761 
 -0.835459 -0.821460 0.649254 
 -0.832908 -0.821460 0.582090 
 -0.831633 -0.821460 0.548507 
 -0.830357 -0.821460 0.518657 
 -0.829082 -0.821460 0.492537 
 -0.841837 -0.820878 0.712687 
 -0.840561 -0.820878 0.720149 
 -0.839286 -0.820878 0.716418 
 -0.838010 -0.820878 0.705224 
 -0.835459 -0.820878 0.641791 
 -0.832908 -0.820878 0.570896 
 -0.831633 -0.820878 0.541045 
 -0.830357 -0.820878 0.507463 
 -0.829082 -0.820878 0.477612 
 -0.840561 -0.820878 0.720149 
 -0.839286 -0.820878 0.716418 
 -0.838010 -0.820878 0.705224 
 -0.836735 -0.820878 0.682836 
 -0.834184 -0.820878 0.604478 
 -0.831633 -0.820878 0.541045 
 -0.830357 -0.820878 0.507463 
 -0.829082 -0.820878 0.477612 
 -0.827806 -0.820878 0.455224 
 -0.840561 -0.820297 0.720149 
 -0.839286 -0.820297 0.720149 
 -0.838010 -0.820297 0.690299 
 -0.836735 -0.820297 0.656716 
 -0.834184 -0.820297 0.578358 
 -0.831633 -0.820297 0.507463 
 -0.830357 -0.820297 0.473881 
 -0.829082 -0.820297 0.444030 
 -0.827806 -0.820297 0.421642 
 -0.840561 -0.819715 0.731343 
 -0.839286 -0.819715 0.712687 
 -0.838010 -0.819715 0.671642 
 -0.836735 -0.819715 0.634328 
 -0.834184 -0.819715 0.552239 
 -0.831633 -0.819715 0.481343 
 -0.830357 -0.819715 0.447761 
 -0.829082 -0.819715 0.417910 
 -0.827806 -0.819715 0.388060 
 -0.839286 -0.819715 0.712687 
 -0.838010 -0.819715 0.671642 
 -0.836735 -0.819715 0.634328 
 -0.835459 -0.819715 0.589552 
 -0.832908 -0.819715 0.518657 
 -0.830357 -0.819715 0.447761 
 -0.829082 -0.819715 0.417910 
 -0.827806 -0.819715 0.388060 
 -0.826531 -0.819715 0.365672 
 -0.839286 -0.819133 0.690299 
 -0.838010 -0.819133 0.649254 
 -0.836735 -0.819133 0.604478 
 -0.835459 -0.819133 0.559701 
 -0.832908 -0.819133 0.485075 
 -0.830357 -0.819133 0.417910 
 -0.829082 -0.819133 0.384328 
 -0.827806 -0.819133 0.354478 
 -0.826531 -0.819133 0.328358 
 -0.839286 -0.818552 0.652985 
 -0.838010 -0.818552 0.604478 
 -0.836735 -0.818552 0.544776 
 -0.835459 -0.818552 0.500000 
 -0.832908 -0.818552 0.432836 
 -0.830357 -0.818552 0.376866 
 -0.829082 -0.818552 0.339552 
 -0.827806 -0.818552 0.313433 
 -0.826531 -0.818552 0.283582 
 -0.838010 -0.818552 0.604478 
 -0.836735 -0.818552 0.544776 
 -0.835459 -0.818552 0.500000 
 -0.834184 -0.818552 0.462687 
 -0.831633 -0.818552 0.402985 
 -0.829082 -0.818552 0.339552 
 -0.827806 -0.818552 0.313433 
 -0.826531 -0.818552 0.283582 
 -0.825255 -0.818552 0.250000 
 -0.838010 -0.817970 0.567164 
 -0.836735 -0.817970 0.511194 
 -0.835459 -0.817970 0.462687 
 -0.834184 -0.817970 0.425373 
 -0.831633 -0.817970 0.380597 
 -0.829082 -0.817970 0.324627 
 -0.827806 -0.817970 0.294776 
 -0.826531 -0.817970 0.264925 
 -0.825255 -0.817970 0.238806 
 -0.838010 -0.817389 0.526119 
 -0.836735 -0.817389 0.477612 
 -0.835459 -0.817389 0.432836 
 -0.834184 -0.817389 0.402985 
 -0.831633 -0.817389 0.350746 
 -0.829082 -0.817389 0.302239 
 -0.827806 -0.817389 0.276119 
 -0.826531 -0.817389 0.246269 
 -0.825255 -0.817389 0.223881 
 -0.836735 -0.817389 0.477612 
 -0.835459 -0.817389 0.432836 
 -0.834184 -0.817389 0.402985 
 -0.832908 -0.817389 0.376866 
 -0.830357 -0.817389 0.324627 
 -0.827806 -0.817389 0.276119 
 -0.826531 -0.817389 0.246269 
 -0.825255 -0.817389 0.223881 
 -0.823980 -0.817389 0.201493 
 -0.836735 -0.816807 0.458955 
 -0.835459 -0.816807 0.421642 
 -0.834184 -0.816807 0.391791 
 -0.832908 -0.816807 0.365672 
 -0.830357 -0.816807 0.313433 
 -0.827806 -0.816807 0.261194 
 -0.826531 -0.816807 0.238806 
 -0.825255 -0.816807 0.216418 
 -0.823980 -0.816807 0.190299 
 -0.836735 -0.816226 0.436567 
 -0.835459 -0.816226 0.406716 
 -0.834184 -0.816226 0.380597 
 -0.832908 -0.816226 0.347015 
 -0.830357 -0.816226 0.298507 
 -0.827806 -0.816226 0.246269 
 -0.826531 -0.816226 0.227612 
 -0.825255 -0.816226 0.201493 
 -0.823980 -0.816226 0.179104 
 -0.835459 -0.816226 0.406716 
 -0.834184 -0.816226 0.380597 
 -0.832908 -0.816226 0.347015 
 -0.831633 -0.816226 0.324627 
 -0.829082 -0.816226 0.272388 
 -0.826531 -0.816226 0.227612 
 -0.825255 -0.816226 0.201493 
 -0.823980 -0.816226 0.179104 
 -0.822704 -0.816226 0.156716 
 -0.835459 -0.815644 0.399254 
 -0.834184 -0.815644 0.369403 
 -0.832908 -0.815644 0.343284 
 -0.831633 -0.815644 0.317164 
 -0.829082 -0.815644 0.268657 
 -0.826531 -0.815644 0.231343 
 -0.825255 -0.815644 0.216418 
 -0.823980 -0.815644 0.201493 
 -0.822704 -0.815644 0.179104 
 -0.835459 -0.815063 0.388060 
 -0.834184 -0.815063 0.361940 
 -0.832908 -0.815063 0.335821 
 -0.831633 -0.815063 0.317164 
 -0.829082 -0.815063 0.294776 
 -0.826531 -0.815063 0.272388 
 -0.825255 -0.815063 0.261194 
 -0.823980 -0.815063 0.250000 
 -0.822704 -0.815063 0.235075 
 -0.834184 -0.815063 0.361940 
 -0.832908 -0.815063 0.335821 
 -0.831633 -0.815063 0.317164 
 -0.830357 -0.815063 0.305970 
 -0.827806 -0.815063 0.283582 
 -0.825255 -0.815063 0.261194 
 -0.823980 -0.815063 0.250000 
 -0.822704 -0.815063 0.235075 
 -0.821429 -0.815063 0.216418 
 -0.834184 -0.814481 0.373134 
 -0.832908 -0.814481 0.343284 
 -0.831633 -0.814481 0.335821 
 -0.830357 -0.814481 0.324627 
 -0.827806 -0.814481 0.305970 
 -0.825255 -0.814481 0.283582 
 -0.823980 -0.814481 0.276119 
 -0.822704 -0.814481 0.264925 
 -0.821429 -0.814481 0.253731 
 -0.834184 -0.813899 0.406716 
 -0.832908 -0.813899 0.391791 
 -0.831633 -0.813899 0.376866 
 -0.830357 -0.813899 0.361940 
 -0.827806 -0.813899 0.339552 
 -0.825255 -0.813899 0.320896 
 -0.823980 -0.813899 0.309701 
 -0.822704 -0.813899 0.298507 
 -0.821429 -0.813899 0.279851 
 -0.834184 -0.813318 0.432836 
 -0.832908 -0.813318 0.417910 
 -0.831633 -0.813318 0.402985 
 -0.830357 -0.813318 0.388060 
 -0.827806 -0.813318 0.361940 
 -0.825255 -0.813318 0.343284 
 -0.823980 -0.813318 0.324627 
 -0.822704 -0.813318 0.305970 
 -0.821429 -0.813318 0.283582 
 -0.832908 -0.813318 0.417910 
 -0.831633 -0.813318 0.402985 
 -0.830357 -0.813318 0.388060 
 -0.829082 -0.813318 0.376866 
 -0.826531 -0.813318 0.354478 
 -0.823980 -0.813318 0.324627 
 -0.822704 -0.813318 0.305970 
 -0.821429 -0.813318 0.283582 
 -0.820153 -0.813318 0.264925 
 -0.832908 -0.812736 0.455224 
 -0.831633 -0.812736 0.440299 
 -0.830357 -0.812736 0.421642 
 -0.829082 -0.812736 0.402985 
 -0.826531 -0.812736 0.361940 
 -0.823980 -0.812736 0.309701 
 -0.822704 -0.812736 0.283582 
 -0.821429 -0.812736 0.261194 
 -0.820153 -0.812736 0.235075 
 -0.832908 -0.812155 0.473881 
 -0.831633 -0.812155 0.451493 
 -0.830357 -0.812155 0.429104 
 -0.829082 -0.812155 0.402985 
 -0.826531 -0.812155 0.354478 
 -0.823980 -0.812155 0.291045 
 -0.822704 -0.812155 0.261194 
 -0.821429 -0.812155 0.238806 
 -0.820153 -0.812155 0.212687 
 -0.831633 -0.812155 0.451493 
 -0.830357 -0.812155 0.429104 
 -0.829082 -0.812155 0.402985 
 -0.827806 -0.812155 0.380597 
 -0.825255 -0.812155 0.324627 
 -0.822704 -0.812155 0.261194 
 -0.821429 -0.812155 0.238806 
 -0.820153 -0.812155 0.212687 
 -0.818878 -0.812155 0.186567 
 -0.831633 -0.811573 0.455224 
 -0.830357 -0.811573 0.425373 
 -0.829082 -0.811573 0.399254 
 -0.827806 -0.811573 0.373134 
 -0.825255 -0.811573 0.309701 
 -0.822704 -0.811573 0.238806 
 -0.821429 -0.811573 0.216418 
 -0.820153 -0.811573 0.194030 
 -0.818878 -0.811573 0.167910 
 -0.831633 -0.810992 0.458955 
 -0.830357 -0.810992 0.429104 
 -0.829082 -0.810992 0.402985 
 -0.827806 -0.810992 0.376866 
 -0.825255 -0.810992 0.309701 
 -0.822704 -0.810992 0.242537 
 -0.821429 -0.810992 0.220149 
 -0.820153 -0.810992 0.205224 
 -0.818878 -0.810992 0.194030 
 -0.830357 -0.810992 0.429104 
 -0.829082 -0.810992 0.402985 
 -0.827806 -0.810992 0.376866 
 -0.826531 -0.810992 0.347015 
 -0.823980 -0.810992 0.272388 
 -0.821429 -0.810992 0.220149 
 -0.820153 -0.810992 0.205224 
 -0.818878 -0.810992 0.194030 
 -0.817602 -0.810992 0.182836 
 -0.830357 -0.810410 0.440299 
 -0.829082 -0.810410 0.414179 
 -0.827806 -0.810410 0.384328 
 -0.826531 -0.810410 0.350746 
 -0.823980 -0.810410 0.283582 
 -0.821429 -0.810410 0.246269 
 -0.820153 -0.810410 0.238806 
 -0.818878 -0.810410 0.231343 
 -0.817602 -0.810410 0.223881 
 -0.830357 -0.809828 0.462687 
 -0.829082 -0.809828 0.432836 
 -0.827806 -0.809828 0.399254 
 -0.826531 -0.809828 0.365672 
 -0.823980 -0.809828 0.313433 
 -0.821429 -0.809828 0.298507 
 -0.820153 -0.809828 0.291045 
 -0.818878 -0.809828 0.283582 
 -0.817602 -0.809828 0.276119 
 -0.829082 -0.809828 0.432836 
 -0.827806 -0.809828 0.399254 
 -0.826531 -0.809828 0.365672 
 -0.825255 -0.809828 0.332090 
 -0.822704 -0.809828 0.305970 
 -0.820153 -0.809828 0.291045 
 -0.818878 -0.809828 0.283582 
 -0.817602 -0.809828 0.276119 
 -0.816327 -0.809828 0.272388 
 -0.829082 -0.809247 0.447761 
 -0.827806 -0.809247 0.414179 
 -0.826531 -0.809247 0.380597 
 -0.825255 -0.809247 0.347015 
 -0.822704 -0.809247 0.339552 
 -0.820153 -0.809247 0.324627 
 -0.818878 -0.809247 0.317164 
 -0.817602 -0.809247 0.305970 
 -0.816327 -0.809247 0.298507 
 -0.829082 -0.808665 0.470149 
 -0.827806 -0.808665 0.432836 
 -0.826531 -0.808665 0.406716 
 -0.825255 -0.808665 0.399254 
 -0.822704 -0.808665 0.391791 
 -0.820153 -0.808665 0.376866 
 -0.818878 -0.808665 0.365672 
 -0.817602 -0.808665 0.354478 
 -0.816327 -0.808665 0.347015 
 -0.827806 -0.808665 0.432836 
 -0.826531 -0.808665 0.406716 
 -0.825255 -0.808665 0.399254 
 -0.823980 -0.808665 0.395522 
 -0.821429 -0.808665 0.388060 
 -0.818878 -0.808665 0.365672 
 -0.817602 -0.808665 0.354478 
 -0.816327 -0.808665 0.347015 
 -0.815051 -0.808665 0.324627 
 -0.827806 -0.808084 0.451493 
 -0.826531 -0.808084 0.432836 
 -0.825255 -0.808084 0.432836 
 -0.823980 -0.808084 0.436567 
 -0.821429 -0.808084 0.432836 
 -0.818878 -0.808084 0.399254 
 -0.817602 -0.808084 0.384328 
 -0.816327 -0.808084 0.369403 
 -0.815051 -0.808084 0.343284 
 -0.827806 -0.807502 0.500000 
 -0.826531 -0.807502 0.485075 
 -0.825255 -0.807502 0.485075 
 -0.823980 -0.807502 0.485075 
 -0.821429 -0.807502 0.473881 
 -0.818878 -0.807502 0.440299 
 -0.817602 -0.807502 0.429104 
 -0.816327 -0.807502 0.399254 
 -0.815051 -0.807502 0.361940 
 -0.826531 -0.807502 0.485075 
 -0.825255 -0.807502 0.485075 
 -0.823980 -0.807502 0.485075 
 -0.822704 -0.807502 0.481343 
 -0.820153 -0.807502 0.458955 
 -0.817602 -0.807502 0.429104 
 -0.816327 -0.807502 0.399254 
 -0.815051 -0.807502 0.361940 
 -0.813776 -0.807502 0.320896 
 -0.826531 -0.806921 0.514925 
 -0.825255 -0.806921 0.514925 
 -0.823980 -0.806921 0.514925 
 -0.822704 -0.806921 0.511194 
 -0.820153 -0.806921 0.485075 
 -0.817602 -0.806921 0.455224 
 -0.816327 -0.806921 0.440299 
 -0.815051 -0.806921 0.384328 
 -0.813776 -0.806921 0.343284 
 -0.826531 -0.806339 0.570896 
 -0.825255 -0.806339 0.563433 
 -0.823980 -0.806339 0.555970 
 -0.822704 -0.806339 0.544776 
 -0.820153 -0.806339 0.507463 
 -0.817602 -0.806339 0.462687 
 -0.816327 -0.806339 0.444030 
 -0.815051 -0.806339 0.402985 
 -0.813776 -0.806339 0.361940 
 -0.825255 -0.806339 0.563433 
 -0.823980 -0.806339 0.555970 
 -0.822704 -0.806339 0.544776 
 -0.821429 -0.806339 0.533582 
 -0.818878 -0.806339 0.485075 
 -0.816327 -0.806339 0.444030 
 -0.815051 -0.806339 0.402985 
 -0.813776 -0.806339 0.361940 
 -0.812500 -0.806339 0.328358 
 -0.825255 -0.805757 0.578358 
 -0.823980 -0.805757 0.563433 
 -0.822704 -0.805757 0.544776 
 -0.821429 -0.805757 0.529851 
 -0.818878 -0.805757 0.473881 
 -0.816327 -0.805757 0.429104 
 -0.815051 -0.805757 0.391791 
 -0.813776 -0.805757 0.354478 
 -0.812500 -0.805757 0.320896 
 -0.825255 -0.805176 0.567164 
 -0.823980 -0.805176 0.548507 
 -0.822704 -0.805176 0.529851 
 -0.821429 -0.805176 0.500000 
 -0.818878 -0.805176 0.451493 
 -0.816327 -0.805176 0.391791 
 -0.815051 -0.805176 0.358209 
 -0.813776 -0.805176 0.324627 
 -0.812500 -0.805176 0.298507 
 -0.823980 -0.805176 0.548507 
 -0.822704 -0.805176 0.529851 
 -0.821429 -0.805176 0.500000 
 -0.820153 -0.805176 0.473881 
 -0.817602 -0.805176 0.425373 
 -0.815051 -0.805176 0.358209 
 -0.813776 -0.805176 0.324627 
 -0.812500 -0.805176 0.298507 
 -0.811224 -0.805176 0.268657 
 -0.823980 -0.804594 0.529851 
 -0.822704 -0.804594 0.503731 
 -0.821429 -0.804594 0.481343 
 -0.820153 -0.804594 0.455224 
 -0.817602 -0.804594 0.399254 
 -0.815051 -0.804594 0.332090 
 -0.813776 -0.804594 0.302239 
 -0.812500 -0.804594 0.272388 
 -0.811224 -0.804594 0.250000 
 -0.823980 -0.804013 0.496269 
 -0.822704 -0.804013 0.473881 
 -0.821429 -0.804013 0.447761 
 -0.820153 -0.804013 0.421642 
 -0.817602 -0.804013 0.358209 
 -0.815051 -0.804013 0.291045 
 -0.813776 -0.804013 0.257463 
 -0.812500 -0.804013 0.235075 
 -0.811224 -0.804013 0.208955 
 -0.822704 -0.803431 0.455224 
 -0.821429 -0.803431 0.429104 
 -0.820153 -0.803431 0.402985 
 -0.818878 -0.803431 0.373134 
 -0.816327 -0.803431 0.309701 
 -0.813776 -0.803431 0.238806 
 -0.812500 -0.803431 0.212687 
 -0.811224 -0.803431 0.186567 
 -0.809949 -0.803431 0.160448 
 -0.822704 -0.802850 0.436567 
 -0.821429 -0.802850 0.414179 
 -0.820153 -0.802850 0.388060 
 -0.818878 -0.802850 0.361940 
 -0.816327 -0.802850 0.305970 
 -0.813776 -0.802850 0.253731 
 -0.812500 -0.802850 0.231343 
 -0.811224 -0.802850 0.208955 
 -0.809949 -0.802850 0.186567 
 -0.822704 -0.802268 0.444030 
 -0.821429 -0.802268 0.421642 
 -0.820153 -0.802268 0.395522 
 -0.818878 -0.802268 0.369403 
 -0.816327 -0.802268 0.317164 
 -0.813776 -0.802268 0.272388 
 -0.812500 -0.802268 0.250000 
 -0.811224 -0.802268 0.231343 
 -0.809949 -0.802268 0.208955 
 -0.821429 -0.802268 0.421642 
 -0.820153 -0.802268 0.395522 
 -0.818878 -0.802268 0.369403 
 -0.817602 -0.802268 0.339552 
 -0.815051 -0.802268 0.294776 
 -0.812500 -0.802268 0.250000 
 -0.811224 -0.802268 0.231343 
 -0.809949 -0.802268 0.208955 
 -0.808673 -0.802268 0.194030 
 -0.821429 -0.801687 0.432836 
 -0.820153 -0.801687 0.410448 
 -0.818878 -0.801687 0.388060 
 -0.817602 -0.801687 0.361940 
 -0.815051 -0.801687 0.317164 
 -0.812500 -0.801687 0.276119 
 -0.811224 -0.801687 0.250000 
 -0.809949 -0.801687 0.235075 
 -0.808673 -0.801687 0.220149 
 -0.821429 -0.801105 0.470149 
 -0.820153 -0.801105 0.440299 
 -0.818878 -0.801105 0.425373 
 -0.817602 -0.801105 0.402985 
 -0.815051 -0.801105 0.354478 
 -0.812500 -0.801105 0.320896 
 -0.811224 -0.801105 0.302239 
 -0.809949 -0.801105 0.279851 
 -0.808673 -0.801105 0.261194 
 -0.820153 -0.801105 0.440299 
 -0.818878 -0.801105 0.425373 
 -0.817602 -0.801105 0.402985 
 -0.816327 -0.801105 0.380597 
 -0.813776 -0.801105 0.335821 
 -0.811224 -0.801105 0.302239 
 -0.809949 -0.801105 0.279851 
 -0.808673 -0.801105 0.261194 
 -0.807398 -0.801105 0.242537 
 -0.820153 -0.800523 0.481343 
 -0.818878 -0.800523 0.462687 
 -0.817602 -0.800523 0.436567 
 -0.816327 -0.800523 0.421642 
 -0.813776 -0.800523 0.376866 
 -0.811224 -0.800523 0.335821 
 -0.809949 -0.800523 0.317164 
 -0.808673 -0.800523 0.294776 
 -0.807398 -0.800523 0.268657 
 -0.820153 -0.799942 0.537313 
 -0.818878 -0.799942 0.533582 
 -0.817602 -0.799942 0.522388 
 -0.816327 -0.799942 0.492537 
 -0.813776 -0.799942 0.447761 
 -0.811224 -0.799942 0.395522 
 -0.809949 -0.799942 0.358209 
 -0.808673 -0.799942 0.317164 
 -0.807398 -0.799942 0.279851 
 -0.818878 -0.799942 0.533582 
 -0.817602 -0.799942 0.522388 
 -0.816327 -0.799942 0.492537 
 -0.815051 -0.799942 0.466418 
 -0.812500 -0.799942 0.425373 
 -0.809949 -0.799942 0.358209 
 -0.808673 -0.799942 0.317164 
 -0.807398 -0.799942 0.279851 
 -0.806122 -0.799942 0.242537 
 -0.818878 -0.799360 0.552239 
 -0.817602 -0.799360 0.544776 
 -0.816327 -0.799360 0.533582 
 -0.815051 -0.799360 0.503731 
 -0.812500 -0.799360 0.447761 
 -0.809949 -0.799360 0.358209 
 -0.808673 -0.799360 0.317164 
 -0.807398 -0.799360 0.279851 
 -0.806122 -0.799360 0.238806 
 -0.818878 -0.798779 0.589552 
 -0.817602 -0.798779 0.578358 
 -0.816327 -0.798779 0.544776 
 -0.815051 -0.798779 0.511194 
 -0.812500 -0.798779 0.436567 
 -0.809949 -0.798779 0.358209 
 -0.808673 -0.798779 0.324627 
 -0.807398 -0.798779 0.291045 
 -0.806122 -0.798779 0.261194 
 -0.817602 -0.798779 0.578358 
 -0.816327 -0.798779 0.544776 
 -0.815051 -0.798779 0.511194 
 -0.813776 -0.798779 0.473881 
 -0.811224 -0.798779 0.395522 
 -0.808673 -0.798779 0.324627 
 -0.807398 -0.798779 0.291045 
 -0.806122 -0.798779 0.261194 
 -0.804847 -0.798779 0.235075 
 -0.817602 -0.798197 0.578358 
 -0.816327 -0.798197 0.544776 
 -0.815051 -0.798197 0.507463 
 -0.813776 -0.798197 0.466418 
 -0.811224 -0.798197 0.395522 
 -0.808673 -0.798197 0.332090 
 -0.807398 -0.798197 0.302239 
 -0.806122 -0.798197 0.276119 
 -0.804847 -0.798197 0.250000 
 -0.817602 -0.797616 0.574627 
 -0.816327 -0.797616 0.552239 
 -0.815051 -0.797616 0.518657 
 -0.813776 -0.797616 0.477612 
 -0.811224 -0.797616 0.410448 
 -0.808673 -0.797616 0.350746 
 -0.807398 -0.797616 0.320896 
 -0.806122 -0.797616 0.294776 
 -0.804847 -0.797616 0.268657 
 -0.816327 -0.797616 0.552239 
 -0.815051 -0.797616 0.518657 
 -0.813776 -0.797616 0.477612 
 -0.812500 -0.797616 0.440299 
 -0.809949 -0.797616 0.380597 
 -0.807398 -0.797616 0.320896 
 -0.806122 -0.797616 0.294776 
 -0.804847 -0.797616 0.268657 
 -0.803571 -0.797616 0.246269 
 -0.816327 -0.797034 0.563433 
 -0.815051 -0.797034 0.533582 
 -0.813776 -0.797034 0.496269 
 -0.812500 -0.797034 0.458955 
 -0.809949 -0.797034 0.391791 
 -0.807398 -0.797034 0.332090 
 -0.806122 -0.797034 0.305970 
 -0.804847 -0.797034 0.283582 
 -0.803571 -0.797034 0.257463 
 -0.816327 -0.796452 0.570896 
 -0.815051 -0.796452 0.567164 
 -0.813776 -0.796452 0.526119 
 -0.812500 -0.796452 0.481343 
 -0.809949 -0.796452 0.410448 
 -0.807398 -0.796452 0.350746 
 -0.806122 -0.796452 0.324627 
 -0.804847 -0.796452 0.302239 
 -0.803571 -0.796452 0.279851 
 -0.815051 -0.796452 0.567164 
 -0.813776 -0.796452 0.526119 
 -0.812500 -0.796452 0.481343 
 -0.811224 -0.796452 0.440299 
 -0.808673 -0.796452 0.380597 
 -0.806122 -0.796452 0.324627 
 -0.804847 -0.796452 0.302239 
 -0.803571 -0.796452 0.279851 
 -0.802296 -0.796452 0.253731 
 -0.815051 -0.795871 0.574627 
 -0.813776 -0.795871 0.541045 
 -0.812500 -0.795871 0.492537 
 -0.811224 -0.795871 0.455224 
 -0.808673 -0.795871 0.391791 
 -0.806122 -0.795871 0.339552 
 -0.804847 -0.795871 0.317164 
 -0.803571 -0.795871 0.294776 
 -0.802296 -0.795871 0.276119 
 -0.815051 -0.795289 0.570896 
 -0.813776 -0.795289 0.541045 
 -0.812500 -0.795289 0.503731 
 -0.811224 -0.795289 0.470149 
 -0.808673 -0.795289 0.414179 
 -0.806122 -0.795289 0.365672 
 -0.804847 -0.795289 0.343284 
 -0.803571 -0.795289 0.328358 
 -0.802296 -0.795289 0.309701 
 -0.813776 -0.795289 0.541045 
 -0.812500 -0.795289 0.503731 
 -0.811224 -0.795289 0.470149 
 -0.809949 -0.795289 0.436567 
 -0.807398 -0.795289 0.388060 
 -0.804847 -0.795289 0.343284 
 -0.803571 -0.795289 0.328358 
 -0.802296 -0.795289 0.309701 
 -0.801020 -0.795289 0.287313 
 -0.813776 -0.794708 0.541045 
 -0.812500 -0.794708 0.511194 
 -0.811224 -0.794708 0.485075 
 -0.809949 -0.794708 0.458955 
 -0.807398 -0.794708 0.410448 
 -0.804847 -0.794708 0.369403 
 -0.803571 -0.794708 0.354478 
 -0.802296 -0.794708 0.335821 
 -0.801020 -0.794708 0.309701 
 -0.813776 -0.794126 0.559701 
 -0.812500 -0.794126 0.537313 
 -0.811224 -0.794126 0.514925 
 -0.809949 -0.794126 0.488806 
 -0.807398 -0.794126 0.436567 
 -0.804847 -0.794126 0.395522 
 -0.803571 -0.794126 0.376866 
 -0.802296 -0.794126 0.350746 
 -0.801020 -0.794126 0.320896 
 -0.812500 -0.794126 0.537313 
 -0.811224 -0.794126 0.514925 
 -0.809949 -0.794126 0.488806 
 -0.808673 -0.794126 0.462687 
 -0.806122 -0.794126 0.414179 
 -0.803571 -0.794126 0.376866 
 -0.802296 -0.794126 0.350746 
 -0.801020 -0.794126 0.320896 
 -0.799745 -0.794126 0.298507 
 -0.812500 -0.793545 0.563433 
 -0.811224 -0.793545 0.537313 
 -0.809949 -0.793545 0.511194 
 -0.808673 -0.793545 0.488806 
 -0.806122 -0.793545 0.432836 
 -0.803571 -0.793545 0.388060 
 -0.802296 -0.793545 0.354478 
 -0.801020 -0.793545 0.328358 
 -0.799745 -0.793545 0.309701 
 -0.812500 -0.792963 0.578358 
 -0.811224 -0.792963 0.570896 
 -0.809949 -0.792963 0.537313 
 -0.808673 -0.792963 0.511194 
 -0.806122 -0.792963 0.455224 
 -0.803571 -0.792963 0.402985 
 -0.802296 -0.792963 0.373134 
 -0.801020 -0.792963 0.347015 
 -0.799745 -0.792963 0.339552 
 -0.811224 -0.792963 0.570896 
 -0.809949 -0.792963 0.537313 
 -0.808673 -0.792963 0.511194 
 -0.807398 -0.792963 0.485075 
 -0.804847 -0.792963 0.429104 
 -0.802296 -0.792963 0.373134 
 -0.801020 -0.792963 0.347015 
 -0.799745 -0.792963 0.339552 
 -0.798469 -0.792963 0.320896 
 -0.811224 -0.792382 0.589552 
 -0.809949 -0.792382 0.578358 
 -0.808673 -0.792382 0.552239 
 -0.807398 -0.792382 0.522388 
 -0.804847 -0.792382 0.462687 
 -0.802296 -0.792382 0.406716 
 -0.801020 -0.792382 0.380597 
 -0.799745 -0.792382 0.361940 
 -0.798469 -0.792382 0.343284 
 -0.811224 -0.791800 0.589552 
 -0.809949 -0.791800 0.589552 
 -0.808673 -0.791800 0.578358 
 -0.807398 -0.791800 0.548507 
 -0.804847 -0.791800 0.496269 
 -0.802296 -0.791800 0.421642 
 -0.801020 -0.791800 0.402985 
 -0.799745 -0.791800 0.384328 
 -0.798469 -0.791800 0.369403 
 -0.809949 -0.791800 0.589552 
 -0.808673 -0.791800 0.578358 
 -0.807398 -0.791800 0.548507 
 -0.806122 -0.791800 0.526119 
 -0.803571 -0.791800 0.455224 
 -0.801020 -0.791800 0.402985 
 -0.799745 -0.791800 0.384328 
 -0.798469 -0.791800 0.369403 
 -0.797194 -0.791800 0.354478 
 -0.809949 -0.791218 0.600746 
 -0.808673 -0.791218 0.608209 
 -0.807398 -0.791218 0.608209 
 -0.806122 -0.791218 0.600746 
 -0.803571 -0.791218 0.529851 
 -0.801020 -0.791218 0.429104 
 -0.799745 -0.791218 0.417910 
 -0.798469 -0.791218 0.406716 
 -0.797194 -0.791218 0.391791 
 -0.809949 -0.790637 0.608209 
 -0.808673 -0.790637 0.619403 
 -0.807398 -0.790637 0.634328 
 -0.806122 -0.790637 0.649254 
 -0.803571 -0.790637 0.630597 
 -0.801020 -0.790637 0.503731 
 -0.799745 -0.790637 0.451493 
 -0.798469 -0.790637 0.432836 
 -0.797194 -0.790637 0.417910 
 -0.808673 -0.790637 0.619403 
 -0.807398 -0.790637 0.634328 
 -0.806122 -0.790637 0.649254 
 -0.804847 -0.790637 0.649254 
 -0.802296 -0.790637 0.555970 
 -0.799745 -0.790637 0.451493 
 -0.798469 -0.790637 0.432836 
 -0.797194 -0.790637 0.417910 
 -0.795918 -0.790637 0.395522 
 -0.808673 -0.790055 0.630597 
 -0.807398 -0.790055 0.649254 
 -0.806122 -0.790055 0.667910 
 -0.804847 -0.790055 0.682836 
 -0.802296 -0.790055 0.652985 
 -0.799745 -0.790055 0.548507 
 -0.798469 -0.790055 0.503731 
 -0.797194 -0.790055 0.462687 
 -0.795918 -0.790055 0.429104 
 -0.808673 -0.789474 0.630597 
 -0.807398 -0.789474 0.649254 
 -0.806122 -0.789474 0.667910 
 -0.804847 -0.789474 0.686567 
 -0.802296 -0.789474 0.682836 
 -0.799745 -0.789474 0.570896 
 -0.798469 -0.789474 0.533582 
 -0.797194 -0.789474 0.485075 
 -0.795918 -0.789474 0.444030 
 -0.808673 -0.788892 0.630597 
 -0.807398 -0.788892 0.649254 
 -0.806122 -0.788892 0.664179 
 -0.804847 -0.788892 0.682836 
 -0.802296 -0.788892 0.675373 
 -0.799745 -0.788892 0.570896 
 -0.798469 -0.788892 0.526119 
 -0.797194 -0.788892 0.485075 
 -0.795918 -0.788892 0.444030 
 -0.807398 -0.788892 0.649254 
 -0.806122 -0.788892 0.664179 
 -0.804847 -0.788892 0.682836 
 -0.803571 -0.788892 0.690299 
 -0.801020 -0.788892 0.619403 
 -0.798469 -0.788892 0.526119 
 -0.797194 -0.788892 0.485075 
 -0.795918 -0.788892 0.444030 
 -0.794643 -0.788892 0.414179 
 -0.807398 -0.788311 0.645522 
 -0.806122 -0.788311 0.664179 
 -0.804847 -0.788311 0.679104 
 -0.803571 -0.788311 0.682836 
 -0.801020 -0.788311 0.611940 
 -0.798469 -0.788311 0.522388 
 -0.797194 -0.788311 0.485075 
 -0.795918 -0.788311 0.444030 
 -0.794643 -0.788311 0.414179 
 -0.807398 -0.787729 0.641791 
 -0.806122 -0.787729 0.660448 
 -0.804847 -0.787729 0.675373 
 -0.803571 -0.787729 0.682836 
 -0.801020 -0.787729 0.608209 
 -0.798469 -0.787729 0.518657 
 -0.797194 -0.787729 0.488806 
 -0.795918 -0.787729 0.458955 
 -0.794643 -0.787729 0.429104 
 -0.806122 -0.787729 0.660448 
 -0.804847 -0.787729 0.675373 
 -0.803571 -0.787729 0.682836 
 -0.802296 -0.787729 0.649254 
 -0.799745 -0.787729 0.559701 
 -0.797194 -0.787729 0.488806 
 -0.795918 -0.787729 0.458955 
 -0.794643 -0.787729 0.429104 
 -0.793367 -0.787729 0.406716 
 -0.806122 -0.787147 0.656716 
 -0.804847 -0.787147 0.671642 
 -0.803571 -0.787147 0.682836 
 -0.802296 -0.787147 0.652985 
 -0.799745 -0.787147 0.570896 
 -0.797194 -0.787147 0.511194 
 -0.795918 -0.787147 0.485075 
 -0.794643 -0.787147 0.458955 
 -0.793367 -0.787147 0.429104 
 -0.806122 -0.786566 0.652985 
 -0.804847 -0.786566 0.667910 
 -0.803571 -0.786566 0.682836 
 -0.802296 -0.786566 0.675373 
 -0.799745 -0.786566 0.604478 
 -0.797194 -0.786566 0.552239 
 -0.795918 -0.786566 0.529851 
 -0.794643 -0.786566 0.500000 
 -0.793367 -0.786566 0.473881 
 -0.804847 -0.786566 0.667910 
 -0.803571 -0.786566 0.682836 
 -0.802296 -0.786566 0.675373 
 -0.801020 -0.786566 0.630597 
 -0.798469 -0.786566 0.578358 
 -0.795918 -0.786566 0.529851 
 -0.794643 -0.786566 0.500000 
 -0.793367 -0.786566 0.473881 
 -0.792092 -0.786566 0.447761 
 -0.804847 -0.785984 0.667910 
 -0.803571 -0.785984 0.682836 
 -0.802296 -0.785984 0.690299 
 -0.801020 -0.785984 0.664179 
 -0.798469 -0.785984 0.604478 
 -0.795918 -0.785984 0.552239 
 -0.794643 -0.785984 0.526119 
 -0.793367 -0.785984 0.492537 
 -0.792092 -0.785984 0.458955 
 -0.804847 -0.785403 0.660448 
 -0.803571 -0.785403 0.675373 
 -0.802296 -0.785403 0.701493 
 -0.801020 -0.785403 0.701493 
 -0.798469 -0.785403 0.645522 
 -0.795918 -0.785403 0.570896 
 -0.794643 -0.785403 0.537313 
 -0.793367 -0.785403 0.503731 
 -0.792092 -0.785403 0.466418 
 -0.803571 -0.785403 0.675373 
 -0.802296 -0.785403 0.701493 
 -0.801020 -0.785403 0.701493 
 -0.799745 -0.785403 0.667910 
 -0.797194 -0.785403 0.608209 
 -0.794643 -0.785403 0.537313 
 -0.793367 -0.785403 0.503731 
 -0.792092 -0.785403 0.466418 
 -0.790816 -0.785403 0.429104 
 -0.803571 -0.784821 0.675373 
 -0.802296 -0.784821 0.697761 
 -0.801020 -0.784821 0.705224 
 -0.799745 -0.784821 0.690299 
 -0.797194 -0.784821 0.619403 
 -0.794643 -0.784821 0.544776 
 -0.793367 -0.784821 0.511194 
 -0.792092 -0.784821 0.473881 
 -0.790816 -0.784821 0.444030 
 -0.803571 -0.784240 0.671642 
 -0.802296 -0.784240 0.694030 
 -0.801020 -0.784240 0.701493 
 -0.799745 -0.784240 0.701493 
 -0.797194 -0.784240 0.626866 
 -0.794643 -0.784240 0.559701 
 -0.793367 -0.784240 0.526119 
 -0.792092 -0.784240 0.503731 
 -0.790816 -0.784240 0.485075 
 -0.802296 -0.784240 0.694030 
 -0.801020 -0.784240 0.701493 
 -0.799745 -0.784240 0.701493 
 -0.798469 -0.784240 0.660448 
 -0.795918 -0.784240 0.589552 
 -0.793367 -0.784240 0.526119 
 -0.792092 -0.784240 0.503731 
 -0.790816 -0.784240 0.485075 
 -0.789541 -0.784240 0.473881 
 -0.802296 -0.783658 0.686567 
 -0.801020 -0.783658 0.708955 
 -0.799745 -0.783658 0.716418 
 -0.798469 -0.783658 0.690299 
 -0.795918 -0.783658 0.611940 
 -0.793367 -0.783658 0.552239 
 -0.792092 -0.783658 0.529851 
 -0.790816 -0.783658 0.518657 
 -0.789541 -0.783658 0.511194 
 -0.802296 -0.783076 0.682836 
 -0.801020 -0.783076 0.708955 
 -0.799745 -0.783076 0.720149 
 -0.798469 -0.783076 0.712687 
 -0.795918 -0.783076 0.634328 
 -0.793367 -0.783076 0.582090 
 -0.792092 -0.783076 0.563433 
 -0.790816 -0.783076 0.552239 
 -0.789541 -0.783076 0.544776 
 -0.801020 -0.783076 0.708955 
 -0.799745 -0.783076 0.720149 
 -0.798469 -0.783076 0.712687 
 -0.797194 -0.783076 0.675373 
 -0.794643 -0.783076 0.604478 
 -0.792092 -0.783076 0.563433 
 -0.790816 -0.783076 0.552239 
 -0.789541 -0.783076 0.544776 
 -0.788265 -0.783076 0.533582 
 -0.801020 -0.782495 0.708955 
 -0.799745 -0.782495 0.723881 
 -0.798469 -0.782495 0.723881 
 -0.797194 -0.782495 0.708955 
 -0.794643 -0.782495 0.638060 
 -0.792092 -0.782495 0.615672 
 -0.790816 -0.782495 0.604478 
 -0.789541 -0.782495 0.589552 
 -0.788265 -0.782495 0.567164 
 -0.801020 -0.781913 0.705224 
 -0.799745 -0.781913 0.720149 
 -0.798469 -0.781913 0.720149 
 -0.797194 -0.781913 0.697761 
 -0.794643 -0.781913 0.667910 
 -0.792092 -0.781913 0.638060 
 -0.790816 -0.781913 0.630597 
 -0.789541 -0.781913 0.619403 
 -0.788265 -0.781913 0.589552 
 -0.799745 -0.781913 0.720149 
 -0.798469 -0.781913 0.720149 
 -0.797194 -0.781913 0.697761 
 -0.795918 -0.781913 0.682836 
 -0.793367 -0.781913 0.649254 
 -0.790816 -0.781913 0.630597 
 -0.789541 -0.781913 0.619403 
 -0.788265 -0.781913 0.589552 
 -0.786990 -0.781913 0.555970 
 -0.799745 -0.781332 0.675373 
 -0.798469 -0.781332 0.679104 
 -0.797194 -0.781332 0.675373 
 -0.795918 -0.781332 0.675373 
 -0.793367 -0.781332 0.671642 
 -0.790816 -0.781332 0.656716 
 -0.789541 -0.781332 0.641791 
 -0.788265 -0.781332 0.615672 
 -0.786990 -0.781332 0.582090 
 -0.799745 -0.780750 0.656716 
 -0.798469 -0.780750 0.660448 
 -0.797194 -0.780750 0.664179 
 -0.795918 -0.780750 0.664179 
 -0.793367 -0.780750 0.667910 
 -0.790816 -0.780750 0.664179 
 -0.789541 -0.780750 0.652985 
 -0.788265 -0.780750 0.634328 
 -0.786990 -0.780750 0.600746 
 -0.798469 -0.780750 0.660448 
 -0.797194 -0.780750 0.664179 
 -0.795918 -0.780750 0.664179 
 -0.794643 -0.780750 0.664179 
 -0.792092 -0.780750 0.664179 
 -0.789541 -0.780750 0.652985 
 -0.788265 -0.780750 0.634328 
 -0.786990 -0.780750 0.600746 
 -0.785714 -0.780750 0.570896 
 -0.798469 -0.780169 0.626866 
 -0.797194 -0.780169 0.634328 
 -0.795918 -0.780169 0.641791 
 -0.794643 -0.780169 0.645522 
 -0.792092 -0.780169 0.652985 
 -0.789541 -0.780169 0.649254 
 -0.788265 -0.780169 0.638060 
 -0.786990 -0.780169 0.619403 
 -0.785714 -0.780169 0.593284 
 -0.798469 -0.779587 0.604478 
 -0.797194 -0.779587 0.608209 
 -0.795918 -0.779587 0.615672 
 -0.794643 -0.779587 0.623134 
 -0.792092 -0.779587 0.638060 
 -0.789541 -0.779587 0.641791 
 -0.788265 -0.779587 0.634328 
 -0.786990 -0.779587 0.623134 
 -0.785714 -0.779587 0.604478 
 -0.797194 -0.779587 0.608209 
 -0.795918 -0.779587 0.615672 
 -0.794643 -0.779587 0.623134 
 -0.793367 -0.779587 0.630597 
 -0.790816 -0.779587 0.641791 
 -0.788265 -0.779587 0.634328 
 -0.786990 -0.779587 0.623134 
 -0.785714 -0.779587 0.604478 
 -0.784439 -0.779587 0.582090 
 -0.797194 -0.779006 0.574627 
 -0.795918 -0.779006 0.582090 
 -0.794643 -0.779006 0.589552 
 -0.793367 -0.779006 0.597015 
 -0.790816 -0.779006 0.611940 
 -0.788265 -0.779006 0.619403 
 -0.786990 -0.779006 0.615672 
 -0.785714 -0.779006 0.608209 
 -0.784439 -0.779006 0.593284 
 -0.797194 -0.778424 0.552239 
 -0.795918 -0.778424 0.559701 
 -0.794643 -0.778424 0.570896 
 -0.793367 -0.778424 0.578358 
 -0.790816 -0.778424 0.589552 
 -0.788265 -0.778424 0.600746 
 -0.786990 -0.778424 0.604478 
 -0.785714 -0.778424 0.604478 
 -0.784439 -0.778424 0.597015 
 -0.795918 -0.778424 0.559701 
 -0.794643 -0.778424 0.570896 
 -0.793367 -0.778424 0.578358 
 -0.792092 -0.778424 0.582090 
 -0.789541 -0.778424 0.597015 
 -0.786990 -0.778424 0.604478 
 -0.785714 -0.778424 0.604478 
 -0.784439 -0.778424 0.597015 
 -0.783163 -0.778424 0.582090 
 -0.795918 -0.777842 0.529851 
 -0.794643 -0.777842 0.541045 
 -0.793367 -0.777842 0.552239 
 -0.792092 -0.777842 0.563433 
 -0.789541 -0.777842 0.574627 
 -0.786990 -0.777842 0.582090 
 -0.785714 -0.777842 0.582090 
 -0.784439 -0.777842 0.582090 
 -0.783163 -0.777842 0.582090 
 -0.795918 -0.777261 0.518657 
 -0.794643 -0.777261 0.526119 
 -0.793367 -0.777261 0.541045 
 -0.792092 -0.777261 0.552239 
 -0.789541 -0.777261 0.567164 
 -0.786990 -0.777261 0.570896 
 -0.785714 -0.777261 0.574627 
 -0.784439 -0.777261 0.574627 
 -0.783163 -0.777261 0.574627 
 -0.794643 -0.777261 0.526119 
 -0.793367 -0.777261 0.541045 
 -0.792092 -0.777261 0.552239 
 -0.790816 -0.777261 0.559701 
 -0.788265 -0.777261 0.570896 
 -0.785714 -0.777261 0.574627 
 -0.784439 -0.777261 0.574627 
 -0.783163 -0.777261 0.574627 
 -0.781888 -0.777261 0.582090 
 -0.794643 -0.776679 0.507463 
 -0.793367 -0.776679 0.518657 
 -0.792092 -0.776679 0.529851 
 -0.790816 -0.776679 0.544776 
 -0.788265 -0.776679 0.552239 
 -0.785714 -0.776679 0.559701 
 -0.784439 -0.776679 0.563433 
 -0.783163 -0.776679 0.567164 
 -0.781888 -0.776679 0.574627 
 -0.794643 -0.776098 0.496269 
 -0.793367 -0.776098 0.507463 
 -0.792092 -0.776098 0.514925 
 -0.790816 -0.776098 0.522388 
 -0.788265 -0.776098 0.537313 
 -0.785714 -0.776098 0.544776 
 -0.784439 -0.776098 0.552239 
 -0.783163 -0.776098 0.559701 
 -0.781888 -0.776098 0.563433 
 -0.793367 -0.776098 0.507463 
 -0.792092 -0.776098 0.514925 
 -0.790816 -0.776098 0.522388 
 -0.789541 -0.776098 0.529851 
 -0.786990 -0.776098 0.541045 
 -0.784439 -0.776098 0.552239 
 -0.783163 -0.776098 0.559701 
 -0.781888 -0.776098 0.563433 
 -0.780612 -0.776098 0.570896 
 -0.793367 -0.775516 0.492537 
 -0.792092 -0.775516 0.500000 
 -0.790816 -0.775516 0.503731 
 -0.789541 -0.775516 0.492537 
 -0.786990 -0.775516 0.507463 
 -0.784439 -0.775516 0.522388 
 -0.783163 -0.775516 0.529851 
 -0.781888 -0.775516 0.548507 
 -0.780612 -0.775516 0.555970 
 -0.793367 -0.774935 0.470149 
 -0.792092 -0.774935 0.473881 
 -0.790816 -0.774935 0.473881 
 -0.789541 -0.774935 0.470149 
 -0.786990 -0.774935 0.485075 
 -0.784439 -0.774935 0.500000 
 -0.783163 -0.774935 0.511194 
 -0.781888 -0.774935 0.518657 
 -0.780612 -0.774935 0.529851 
 -0.792092 -0.774935 0.473881 
 -0.790816 -0.774935 0.473881 
 -0.789541 -0.774935 0.470149 
 -0.788265 -0.774935 0.473881 
 -0.785714 -0.774935 0.492537 
 -0.783163 -0.774935 0.511194 
 -0.781888 -0.774935 0.518657 
 -0.780612 -0.774935 0.529851 
 -0.779337 -0.774935 0.552239 
 -0.792092 -0.774353 0.458955 
 -0.790816 -0.774353 0.455224 
 -0.789541 -0.774353 0.451493 
 -0.788265 -0.774353 0.451493 
 -0.785714 -0.774353 0.470149 
 -0.783163 -0.774353 0.492537 
 -0.781888 -0.774353 0.503731 
 -0.780612 -0.774353 0.511194 
 -0.779337 -0.774353 0.522388 
 -0.792092 -0.773771 0.429104 
 -0.790816 -0.773771 0.421642 
 -0.789541 -0.773771 0.417910 
 -0.788265 -0.773771 0.414179 
 -0.785714 -0.773771 0.436567 
 -0.783163 -0.773771 0.462687 
 -0.781888 -0.773771 0.473881 
 -0.780612 -0.773771 0.485075 
 -0.779337 -0.773771 0.496269 
 -0.790816 -0.773771 0.421642 
 -0.789541 -0.773771 0.417910 
 -0.788265 -0.773771 0.414179 
 -0.786990 -0.773771 0.425373 
 -0.784439 -0.773771 0.451493 
 -0.781888 -0.773771 0.473881 
 -0.780612 -0.773771 0.485075 
 -0.779337 -0.773771 0.496269 
 -0.778061 -0.773771 0.511194 
 -0.790816 -0.773190 0.391791 
 -0.789541 -0.773190 0.391791 
 -0.788265 -0.773190 0.391791 
 -0.786990 -0.773190 0.402985 
 -0.784439 -0.773190 0.429104 
 -0.781888 -0.773190 0.455224 
 -0.780612 -0.773190 0.466418 
 -0.779337 -0.773190 0.481343 
 -0.778061 -0.773190 0.492537 
 -0.790816 -0.772608 0.347015 
 -0.789541 -0.772608 0.347015 
 -0.788265 -0.772608 0.358209 
 -0.786990 -0.772608 0.369403 
 -0.784439 -0.772608 0.399254 
 -0.781888 -0.772608 0.429104 
 -0.780612 -0.772608 0.440299 
 -0.779337 -0.772608 0.455224 
 -0.778061 -0.772608 0.470149 
 -0.789541 -0.772608 0.347015 
 -0.788265 -0.772608 0.358209 
 -0.786990 -0.772608 0.369403 
 -0.785714 -0.772608 0.384328 
 -0.783163 -0.772608 0.414179 
 -0.780612 -0.772608 0.440299 
 -0.779337 -0.772608 0.455224 
 -0.778061 -0.772608 0.470149 
 -0.776786 -0.772608 0.485075 
 -0.789541 -0.772027 0.328358 
 -0.788265 -0.772027 0.335821 
 -0.786990 -0.772027 0.347015 
 -0.785714 -0.772027 0.365672 
 -0.783163 -0.772027 0.395522 
 -0.780612 -0.772027 0.425373 
 -0.779337 -0.772027 0.440299 
 -0.778061 -0.772027 0.458955 
 -0.776786 -0.772027 0.477612 
 -0.789541 -0.771445 0.302239 
 -0.788265 -0.771445 0.313433 
 -0.786990 -0.771445 0.324627 
 -0.785714 -0.771445 0.335821 
 -0.783163 -0.771445 0.373134 
 -0.780612 -0.771445 0.406716 
 -0.779337 -0.771445 0.429104 
 -0.778061 -0.771445 0.447761 
 -0.776786 -0.771445 0.466418 
 -0.788265 -0.771445 0.313433 
 -0.786990 -0.771445 0.324627 
 -0.785714 -0.771445 0.335821 
 -0.784439 -0.771445 0.350746 
 -0.781888 -0.771445 0.388060 
 -0.779337 -0.771445 0.429104 
 -0.778061 -0.771445 0.447761 
 -0.776786 -0.771445 0.466418 
 -0.775510 -0.771445 0.477612 
 -0.788265 -0.770864 0.294776 
 -0.786990 -0.770864 0.305970 
 -0.785714 -0.770864 0.324627 
 -0.784439 -0.770864 0.339552 
 -0.781888 -0.770864 0.380597 
 -0.779337 -0.770864 0.429104 
 -0.778061 -0.770864 0.447761 
 -0.776786 -0.770864 0.462687 
 -0.775510 -0.770864 0.473881 
 -0.788265 -0.770282 0.272388 
 -0.786990 -0.770282 0.291045 
 -0.785714 -0.770282 0.309701 
 -0.784439 -0.770282 0.328358 
 -0.781888 -0.770282 0.376866 
 -0.779337 -0.770282 0.429104 
 -0.778061 -0.770282 0.447761 
 -0.776786 -0.770282 0.458955 
 -0.775510 -0.770282 0.470149 
 -0.786990 -0.770282 0.291045 
 -0.785714 -0.770282 0.309701 
 -0.784439 -0.770282 0.328358 
 -0.783163 -0.770282 0.350746 
 -0.780612 -0.770282 0.402985 
 -0.778061 -0.770282 0.447761 
 -0.776786 -0.770282 0.458955 
 -0.775510 -0.770282 0.470149 
 -0.774235 -0.770282 0.481343 
 -0.786990 -0.769700 0.287313 
 -0.785714 -0.769700 0.305970 
 -0.784439 -0.769700 0.328358 
 -0.783163 -0.769700 0.347015 
 -0.780612 -0.769700 0.406716 
 -0.778061 -0.769700 0.447761 
 -0.776786 -0.769700 0.458955 
 -0.775510 -0.769700 0.470149 
 -0.774235 -0.769700 0.481343 
 -0.786990 -0.769119 0.287313 
 -0.785714 -0.769119 0.309701 
 -0.784439 -0.769119 0.328358 
 -0.783163 -0.769119 0.350746 
 -0.780612 -0.769119 0.406716 
 -0.778061 -0.769119 0.444030 
 -0.776786 -0.769119 0.455224 
 -0.775510 -0.769119 0.466418 
 -0.774235 -0.769119 0.481343 
 -0.785714 -0.768537 0.309701 
 -0.784439 -0.768537 0.332090 
 -0.783163 -0.768537 0.354478 
 -0.781888 -0.768537 0.380597 
 -0.779337 -0.768537 0.436567 
 -0.776786 -0.768537 0.455224 
 -0.775510 -0.768537 0.466418 
 -0.774235 -0.768537 0.481343 
 -0.772959 -0.768537 0.496269 
 -0.785714 -0.767956 0.313433 
 -0.784439 -0.767956 0.332090 
 -0.783163 -0.767956 0.354478 
 -0.781888 -0.767956 0.384328 
 -0.779337 -0.767956 0.436567 
 -0.776786 -0.767956 0.455224 
 -0.775510 -0.767956 0.470149 
 -0.774235 -0.767956 0.488806 
 -0.772959 -0.767956 0.507463 
 -0.785714 -0.767374 0.317164 
 -0.784439 -0.767374 0.335821 
 -0.783163 -0.767374 0.358209 
 -0.781888 -0.767374 0.388060 
 -0.779337 -0.767374 0.436567 
 -0.776786 -0.767374 0.455224 
 -0.775510 -0.767374 0.473881 
 -0.774235 -0.767374 0.496269 
 -0.772959 -0.767374 0.514925 
 -0.784439 -0.767374 0.335821 
 -0.783163 -0.767374 0.358209 
 -0.781888 -0.767374 0.388060 
 -0.780612 -0.767374 0.414179 
 -0.778061 -0.767374 0.447761 
 -0.775510 -0.767374 0.473881 
 -0.774235 -0.767374 0.496269 
 -0.772959 -0.767374 0.514925 
 -0.771684 -0.767374 0.514925 
 -0.784439 -0.766793 0.339552 
 -0.783163 -0.766793 0.365672 
 -0.781888 -0.766793 0.391791 
 -0.780612 -0.766793 0.414179 
 -0.778061 -0.766793 0.447761 
 -0.775510 -0.766793 0.485075 
 -0.774235 -0.766793 0.503731 
 -0.772959 -0.766793 0.514925 
 -0.771684 -0.766793 0.514925 
 -0.784439 -0.766211 0.350746 
 -0.783163 -0.766211 0.373134 
 -0.781888 -0.766211 0.395522 
 -0.780612 -0.766211 0.417910 
 -0.778061 -0.766211 0.451493 
 -0.775510 -0.766211 0.492537 
 -0.774235 -0.766211 0.507463 
 -0.772959 -0.766211 0.514925 
 -0.771684 -0.766211 0.514925 
 -0.783163 -0.766211 0.373134 
 -0.781888 -0.766211 0.395522 
 -0.780612 -0.766211 0.417910 
 -0.779337 -0.766211 0.440299 
 -0.776786 -0.766211 0.470149 
 -0.774235 -0.766211 0.507463 
 -0.772959 -0.766211 0.514925 
 -0.771684 -0.766211 0.514925 
 -0.770408 -0.766211 0.492537 
 -0.783163 -0.765630 0.380597 
 -0.781888 -0.765630 0.399254 
 -0.780612 -0.765630 0.421642 
 -0.779337 -0.765630 0.440299 
 -0.776786 -0.765630 0.477612 
 -0.774235 -0.765630 0.511194 
 -0.772959 -0.765630 0.518657 
 -0.771684 -0.765630 0.511194 
 -0.770408 -0.765630 0.488806 
 -0.783163 -0.765048 0.388060 
 -0.781888 -0.765048 0.410448 
 -0.780612 -0.765048 0.432836 
 -0.779337 -0.765048 0.451493 
 -0.776786 -0.765048 0.488806 
 -0.774235 -0.765048 0.514925 
 -0.772959 -0.765048 0.514925 
 -0.771684 -0.765048 0.503731 
 -0.770408 -0.765048 0.473881 
 -0.781888 -0.765048 0.410448 
 -0.780612 -0.765048 0.432836 
 -0.779337 -0.765048 0.451493 
 -0.778061 -0.765048 0.470149 
 -0.775510 -0.765048 0.503731 
 -0.772959 -0.765048 0.514925 
 -0.771684 -0.765048 0.503731 
 -0.770408 -0.765048 0.473881 
 -0.769133 -0.765048 0.447761 
 -0.781888 -0.764466 0.414179 
 -0.780612 -0.764466 0.440299 
 -0.779337 -0.764466 0.458955 
 -0.778061 -0.764466 0.477612 
 -0.775510 -0.764466 0.511194 
 -0.772959 -0.764466 0.514925 
 -0.771684 -0.764466 0.496269 
 -0.770408 -0.764466 0.455224 
 -0.769133 -0.764466 0.429104 
 -0.781888 -0.763885 0.421642 
 -0.780612 -0.763885 0.447761 
 -0.779337 -0.763885 0.466418 
 -0.778061 -0.763885 0.488806 
 -0.775510 -0.763885 0.518657 
 -0.772959 -0.763885 0.503731 
 -0.771684 -0.763885 0.470149 
 -0.770408 -0.763885 0.429104 
 -0.769133 -0.763885 0.406716 
 -0.780612 -0.763885 0.447761 
 -0.779337 -0.763885 0.466418 
 -0.778061 -0.763885 0.488806 
 -0.776786 -0.763885 0.507463 
 -0.774235 -0.763885 0.514925 
 -0.771684 -0.763885 0.470149 
 -0.770408 -0.763885 0.429104 
 -0.769133 -0.763885 0.406716 
 -0.767857 -0.763885 0.380597 
 -0.780612 -0.763303 0.451493 
 -0.779337 -0.763303 0.473881 
 -0.778061 -0.763303 0.496269 
 -0.776786 -0.763303 0.514925 
 -0.774235 -0.763303 0.522388 
 -0.771684 -0.763303 0.458955 
 -0.770408 -0.763303 0.425373 
 -0.769133 -0.763303 0.402985 
 -0.767857 -0.763303 0.376866 
 -0.780612 -0.762722 0.462687 
 -0.779337 -0.762722 0.488806 
 -0.778061 -0.762722 0.514925 
 -0.776786 -0.762722 0.541045 
 -0.774235 -0.762722 0.537313 
 -0.771684 -0.762722 0.477612 
 -0.770408 -0.762722 0.444030 
 -0.769133 -0.762722 0.417910 
 -0.767857 -0.762722 0.391791 
 -0.779337 -0.762722 0.488806 
 -0.778061 -0.762722 0.514925 
 -0.776786 -0.762722 0.541045 
 -0.775510 -0.762722 0.548507 
 -0.772959 -0.762722 0.511194 
 -0.770408 -0.762722 0.444030 
 -0.769133 -0.762722 0.417910 
 -0.767857 -0.762722 0.391791 
 -0.766582 -0.762722 0.369403 
 -0.779337 -0.762140 0.503731 
 -0.778061 -0.762140 0.529851 
 -0.776786 -0.762140 0.552239 
 -0.775510 -0.762140 0.563433 
 -0.772959 -0.762140 0.533582 
 -0.770408 -0.762140 0.462687 
 -0.769133 -0.762140 0.429104 
 -0.767857 -0.762140 0.406716 
 -0.766582 -0.762140 0.384328 
 -0.779337 -0.761559 0.537313 
 -0.778061 -0.761559 0.555970 
 -0.776786 -0.761559 0.574627 
 -0.775510 -0.761559 0.582090 
 -0.772959 -0.761559 0.548507 
 -0.770408 -0.761559 0.488806 
 -0.769133 -0.761559 0.455224 
 -0.767857 -0.761559 0.425373 
 -0.766582 -0.761559 0.402985 
 -0.778061 -0.761559 0.555970 
 -0.776786 -0.761559 0.574627 
 -0.775510 -0.761559 0.582090 
 -0.774235 -0.761559 0.567164 
 -0.771684 -0.761559 0.533582 
 -0.769133 -0.761559 0.455224 
 -0.767857 -0.761559 0.425373 
 -0.766582 -0.761559 0.402985 
 -0.765306 -0.761559 0.384328 
 -0.778061 -0.760977 0.578358 
 -0.776786 -0.760977 0.589552 
 -0.775510 -0.760977 0.597015 
 -0.774235 -0.760977 0.582090 
 -0.771684 -0.760977 0.537313 
 -0.769133 -0.760977 0.466418 
 -0.767857 -0.760977 0.436567 
 -0.766582 -0.760977 0.414179 
 -0.765306 -0.760977 0.391791 
 -0.778061 -0.760395 0.619403 
 -0.776786 -0.760395 0.630597 
 -0.775510 -0.760395 0.619403 
 -0.774235 -0.760395 0.597015 
 -0.771684 -0.760395 0.541045 
 -0.769133 -0.760395 0.470149 
 -0.767857 -0.760395 0.436567 
 -0.766582 -0.760395 0.406716 
 -0.765306 -0.760395 0.380597 
 -0.776786 -0.760395 0.630597 
 -0.775510 -0.760395 0.619403 
 -0.774235 -0.760395 0.597015 
 -0.772959 -0.760395 0.570896 
 -0.770408 -0.760395 0.507463 
 -0.767857 -0.760395 0.436567 
 -0.766582 -0.760395 0.406716 
 -0.765306 -0.760395 0.380597 
 -0.764031 -0.760395 0.350746 
 -0.776786 -0.759814 0.645522 
 -0.775510 -0.759814 0.630597 
 -0.774235 -0.759814 0.600746 
 -0.772959 -0.759814 0.574627 
 -0.770408 -0.759814 0.507463 
 -0.767857 -0.759814 0.432836 
 -0.766582 -0.759814 0.399254 
 -0.765306 -0.759814 0.365672 
 -0.764031 -0.759814 0.332090 
 -0.776786 -0.759232 0.645522 
 -0.775510 -0.759232 0.645522 
 -0.774235 -0.759232 0.611940 
 -0.772959 -0.759232 0.578358 
 -0.770408 -0.759232 0.511194 
 -0.767857 -0.759232 0.425373 
 -0.766582 -0.759232 0.388060 
 -0.765306 -0.759232 0.347015 
 -0.764031 -0.759232 0.305970 
 -0.775510 -0.759232 0.645522 
 -0.774235 -0.759232 0.611940 
 -0.772959 -0.759232 0.578358 
 -0.771684 -0.759232 0.548507 
 -0.769133 -0.759232 0.466418 
 -0.766582 -0.759232 0.388060 
 -0.765306 -0.759232 0.347015 
 -0.764031 -0.759232 0.305970 
 -0.762755 -0.759232 0.261194 
 -0.775510 -0.758651 0.645522 
 -0.774235 -0.758651 0.619403 
 -0.772959 -0.758651 0.585821 
 -0.771684 -0.758651 0.552239 
 -0.769133 -0.758651 0.462687 
 -0.766582 -0.758651 0.384328 
 -0.765306 -0.758651 0.343284 
 -0.764031 -0.758651 0.305970 
 -0.762755 -0.758651 0.264925 
 -0.775510 -0.758069 0.626866 
 -0.774235 -0.758069 0.626866 
 -0.772959 -0.758069 0.593284 
 -0.771684 -0.758069 0.555970 
 -0.769133 -0.758069 0.462687 
 -0.766582 -0.758069 0.380597 
 -0.765306 -0.758069 0.339552 
 -0.764031 -0.758069 0.309701 
 -0.762755 -0.758069 0.283582 
 -0.774235 -0.758069 0.626866 
 -0.772959 -0.758069 0.593284 
 -0.771684 -0.758069 0.555970 
 -0.770408 -0.758069 0.514925 
 -0.767857 -0.758069 0.417910 
 -0.765306 -0.758069 0.339552 
 -0.764031 -0.758069 0.309701 
 -0.762755 -0.758069 0.283582 
 -0.761480 -0.758069 0.257463 
 -0.774235 -0.757488 0.626866 
 -0.772959 -0.757488 0.600746 
 -0.771684 -0.757488 0.559701 
 -0.770408 -0.757488 0.518657 
 -0.767857 -0.757488 0.421642 
 -0.765306 -0.757488 0.350746 
 -0.764031 -0.757488 0.324627 
 -0.762755 -0.757488 0.302239 
 -0.761480 -0.757488 0.279851 
 -0.774235 -0.756906 0.630597 
 -0.772959 -0.756906 0.604478 
 -0.771684 -0.756906 0.563433 
 -0.770408 -0.756906 0.518657 
 -0.767857 -0.756906 0.425373 
 -0.765306 -0.756906 0.373134 
 -0.764031 -0.756906 0.343284 
 -0.762755 -0.756906 0.328358 
 -0.761480 -0.756906 0.305970 
 -0.772959 -0.756906 0.604478 
 -0.771684 -0.756906 0.563433 
 -0.770408 -0.756906 0.518657 
 -0.769133 -0.756906 0.470149 
 -0.766582 -0.756906 0.395522 
 -0.764031 -0.756906 0.343284 
 -0.762755 -0.756906 0.328358 
 -0.761480 -0.756906 0.305970 
 -0.760204 -0.756906 0.283582 
 -0.772959 -0.756325 0.615672 
 -0.771684 -0.756325 0.574627 
 -0.770408 -0.756325 0.529851 
 -0.769133 -0.756325 0.488806 
 -0.766582 -0.756325 0.436567 
 -0.764031 -0.756325 0.395522 
 -0.762755 -0.756325 0.373134 
 -0.761480 -0.756325 0.350746 
 -0.760204 -0.756325 0.324627 
 -0.772959 -0.755743 0.626866 
 -0.771684 -0.755743 0.589552 
 -0.770408 -0.755743 0.552239 
 -0.769133 -0.755743 0.514925 
 -0.766582 -0.755743 0.473881 
 -0.764031 -0.755743 0.432836 
 -0.762755 -0.755743 0.399254 
 -0.761480 -0.755743 0.373134 
 -0.760204 -0.755743 0.347015 
 -0.771684 -0.755743 0.589552 
 -0.770408 -0.755743 0.552239 
 -0.769133 -0.755743 0.514925 
 -0.767857 -0.755743 0.492537 
 -0.765306 -0.755743 0.455224 
 -0.762755 -0.755743 0.399254 
 -0.761480 -0.755743 0.373134 
 -0.760204 -0.755743 0.347015 
 -0.758929 -0.755743 0.320896 
 -0.771684 -0.755161 0.623134 
 -0.770408 -0.755161 0.593284 
 -0.769133 -0.755161 0.567164 
 -0.767857 -0.755161 0.541045 
 -0.765306 -0.755161 0.485075 
 -0.762755 -0.755161 0.417910 
 -0.761480 -0.755161 0.388060 
 -0.760204 -0.755161 0.358209 
 -0.758929 -0.755161 0.332090 
 -0.771684 -0.754580 0.641791 
 -0.770408 -0.754580 0.623134 
 -0.769133 -0.754580 0.589552 
 -0.767857 -0.754580 0.555970 
 -0.765306 -0.754580 0.492537 
 -0.762755 -0.754580 0.425373 
 -0.761480 -0.754580 0.395522 
 -0.760204 -0.754580 0.365672 
 -0.758929 -0.754580 0.335821 
 -0.770408 -0.754580 0.623134 
 -0.769133 -0.754580 0.589552 
 -0.767857 -0.754580 0.555970 
 -0.766582 -0.754580 0.522388 
 -0.764031 -0.754580 0.458955 
 -0.761480 -0.754580 0.395522 
 -0.760204 -0.754580 0.365672 
 -0.758929 -0.754580 0.335821 
 -0.757653 -0.754580 0.317164 
 -0.770408 -0.753998 0.634328 
 -0.769133 -0.753998 0.597015 
 -0.767857 -0.753998 0.552239 
 -0.766582 -0.753998 0.518657 
 -0.764031 -0.753998 0.466418 
 -0.761480 -0.753998 0.410448 
 -0.760204 -0.753998 0.384328 
 -0.758929 -0.753998 0.358209 
 -0.757653 -0.753998 0.335821 
 -0.770408 -0.753417 0.634328 
 -0.769133 -0.753417 0.600746 
 -0.767857 -0.753417 0.559701 
 -0.766582 -0.753417 0.526119 
 -0.764031 -0.753417 0.477612 
 -0.761480 -0.753417 0.425373 
 -0.760204 -0.753417 0.399254 
 -0.758929 -0.753417 0.376866 
 -0.757653 -0.753417 0.350746 
 -0.769133 -0.753417 0.600746 
 -0.767857 -0.753417 0.559701 
 -0.766582 -0.753417 0.526119 
 -0.765306 -0.753417 0.500000 
 -0.762755 -0.753417 0.451493 
 -0.760204 -0.753417 0.399254 
 -0.758929 -0.753417 0.376866 
 -0.757653 -0.753417 0.350746 
 -0.756378 -0.753417 0.332090 
 -0.769133 -0.752835 0.619403 
 -0.767857 -0.752835 0.589552 
 -0.766582 -0.752835 0.552239 
 -0.765306 -0.752835 0.522388 
 -0.762755 -0.752835 0.473881 
 -0.760204 -0.752835 0.425373 
 -0.758929 -0.752835 0.402985 
 -0.757653 -0.752835 0.384328 
 -0.756378 -0.752835 0.369403 
 -0.769133 -0.752254 0.638060 
 -0.767857 -0.752254 0.611940 
 -0.766582 -0.752254 0.574627 
 -0.765306 -0.752254 0.541045 
 -0.762755 -0.752254 0.492537 
 -0.760204 -0.752254 0.444030 
 -0.758929 -0.752254 0.425373 
 -0.757653 -0.752254 0.410448 
 -0.756378 -0.752254 0.395522 
 -0.767857 -0.752254 0.611940 
 -0.766582 -0.752254 0.574627 
 -0.765306 -0.752254 0.541045 
 -0.764031 -0.752254 0.514925 
 -0.761480 -0.752254 0.466418 
 -0.758929 -0.752254 0.425373 
 -0.757653 -0.752254 0.410448 
 -0.756378 -0.752254 0.395522 
 -0.755102 -0.752254 0.376866 
 -0.767857 -0.751672 0.638060 
 -0.766582 -0.751672 0.608209 
 -0.765306 -0.751672 0.570896 
 -0.764031 -0.751672 0.541045 
 -0.761480 -0.751672 0.496269 
 -0.758929 -0.751672 0.466418 
 -0.757653 -0.751672 0.451493 
 -0.756378 -0.751672 0.432836 
 -0.755102 -0.751672 0.417910 
 -0.767857 -0.751090 0.638060 
 -0.766582 -0.751090 0.619403 
 -0.765306 -0.751090 0.589552 
 -0.764031 -0.751090 0.555970 
 -0.761480 -0.751090 0.522388 
 -0.758929 -0.751090 0.500000 
 -0.757653 -0.751090 0.481343 
 -0.756378 -0.751090 0.462687 
 -0.755102 -0.751090 0.444030 
 -0.766582 -0.751090 0.619403 
 -0.765306 -0.751090 0.589552 
 -0.764031 -0.751090 0.555970 
 -0.762755 -0.751090 0.533582 
 -0.760204 -0.751090 0.511194 
 -0.757653 -0.751090 0.481343 
 -0.756378 -0.751090 0.462687 
 -0.755102 -0.751090 0.444030 
 -0.753827 -0.751090 0.429104 
 -0.766582 -0.750509 0.608209 
 -0.765306 -0.750509 0.597015 
 -0.764031 -0.750509 0.589552 
 -0.762755 -0.750509 0.574627 
 -0.760204 -0.750509 0.555970 
 -0.757653 -0.750509 0.518657 
 -0.756378 -0.750509 0.496269 
 -0.755102 -0.750509 0.473881 
 -0.753827 -0.750509 0.462687 
 -0.766582 -0.749927 0.578358 
 -0.765306 -0.749927 0.578358 
 -0.764031 -0.749927 0.578358 
 -0.762755 -0.749927 0.570896 
 -0.760204 -0.749927 0.567164 
 -0.757653 -0.749927 0.526119 
 -0.756378 -0.749927 0.503731 
 -0.755102 -0.749927 0.485075 
 -0.753827 -0.749927 0.473881 
 -0.765306 -0.749927 0.578358 
 -0.764031 -0.749927 0.578358 
 -0.762755 -0.749927 0.570896 
 -0.761480 -0.749927 0.570896 
 -0.758929 -0.749927 0.544776 
 -0.756378 -0.749927 0.503731 
 -0.755102 -0.749927 0.485075 
 -0.753827 -0.749927 0.473881 
 -0.752551 -0.749927 0.470149 
 -0.765306 -0.749346 0.548507 
 -0.764031 -0.749346 0.552239 
 -0.762755 -0.749346 0.555970 
 -0.761480 -0.749346 0.559701 
 -0.758929 -0.749346 0.548507 
 -0.756378 -0.749346 0.522388 
 -0.755102 -0.749346 0.514925 
 -0.753827 -0.749346 0.507463 
 -0.752551 -0.749346 0.503731 
 -0.765306 -0.748764 0.518657 
 -0.764031 -0.748764 0.537313 
 -0.762755 -0.748764 0.541045 
 -0.761480 -0.748764 0.548507 
 -0.758929 -0.748764 0.552239 
 -0.756378 -0.748764 0.533582 
 -0.755102 -0.748764 0.529851 
 -0.753827 -0.748764 0.522388 
 -0.752551 -0.748764 0.522388 
 -0.764031 -0.748764 0.537313 
 -0.762755 -0.748764 0.541045 
 -0.761480 -0.748764 0.548507 
 -0.760204 -0.748764 0.552239 
 -0.757653 -0.748764 0.544776 
 -0.755102 -0.748764 0.529851 
 -0.753827 -0.748764 0.522388 
 -0.752551 -0.748764 0.522388 
 -0.751276 -0.748764 0.518657 
 -0.764031 -0.748183 0.511194 
 -0.762755 -0.748183 0.533582 
 -0.761480 -0.748183 0.541045 
 -0.760204 -0.748183 0.548507 
 -0.757653 -0.748183 0.552239 
 -0.755102 -0.748183 0.537313 
 -0.753827 -0.748183 0.533582 
 -0.752551 -0.748183 0.526119 
 -0.751276 -0.748183 0.518657 
 -0.764031 -0.747601 0.470149 
 -0.762755 -0.747601 0.492537 
 -0.761480 -0.747601 0.511194 
 -0.760204 -0.747601 0.529851 
 -0.757653 -0.747601 0.537313 
 -0.755102 -0.747601 0.533582 
 -0.753827 -0.747601 0.522388 
 -0.752551 -0.747601 0.518657 
 -0.751276 -0.747601 0.518657 
 -0.762755 -0.747601 0.492537 
 -0.761480 -0.747601 0.511194 
 -0.760204 -0.747601 0.529851 
 -0.758929 -0.747601 0.533582 
 -0.756378 -0.747601 0.537313 
 -0.753827 -0.747601 0.522388 
 -0.752551 -0.747601 0.518657 
 -0.751276 -0.747601 0.518657 
 -0.750000 -0.747601 0.514925 
 -0.762755 -0.747019 0.466418 
 -0.761480 -0.747019 0.485075 
 -0.760204 -0.747019 0.500000 
 -0.758929 -0.747019 0.511194 
 -0.756378 -0.747019 0.511194 
 -0.753827 -0.747019 0.503731 
 -0.752551 -0.747019 0.500000 
 -0.751276 -0.747019 0.496269 
 -0.750000 -0.747019 0.492537 
 -0.762755 -0.746438 0.432836 
 -0.761480 -0.746438 0.455224 
 -0.760204 -0.746438 0.466418 
 -0.758929 -0.746438 0.473881 
 -0.756378 -0.746438 0.470149 
 -0.753827 -0.746438 0.458955 
 -0.752551 -0.746438 0.455224 
 -0.751276 -0.746438 0.451493 
 -0.750000 -0.746438 0.447761 
 -0.761480 -0.746438 0.455224 
 -0.760204 -0.746438 0.466418 
 -0.758929 -0.746438 0.473881 
 -0.757653 -0.746438 0.473881 
 -0.755102 -0.746438 0.466418 
 -0.752551 -0.746438 0.455224 
 -0.751276 -0.746438 0.451493 
 -0.750000 -0.746438 0.447761 
 -0.748724 -0.746438 0.444030 
 -0.761480 -0.745856 0.436567 
 -0.760204 -0.745856 0.447761 
 -0.758929 -0.745856 0.451493 
 -0.757653 -0.745856 0.447761 
 -0.755102 -0.745856 0.440299 
 -0.752551 -0.745856 0.429104 
 -0.751276 -0.745856 0.421642 
 -0.750000 -0.745856 0.417910 
 -0.748724 -0.745856 0.414179 
 -0.761480 -0.745275 0.388060 
 -0.760204 -0.745275 0.399254 
 -0.758929 -0.745275 0.399254 
 -0.757653 -0.745275 0.395522 
 -0.755102 -0.745275 0.388060 
 -0.752551 -0.745275 0.376866 
 -0.751276 -0.745275 0.373134 
 -0.750000 -0.745275 0.365672 
 -0.748724 -0.745275 0.365672 
 -0.760204 -0.744693 0.358209 
 -0.758929 -0.744693 0.361940 
 -0.757653 -0.744693 0.361940 
 -0.756378 -0.744693 0.358209 
 -0.753827 -0.744693 0.347015 
 -0.751276 -0.744693 0.335821 
 -0.750000 -0.744693 0.332090 
 -0.748724 -0.744693 0.332090 
 -0.747449 -0.744693 0.354478 
 -0.760204 -0.744112 0.298507 
 -0.758929 -0.744112 0.298507 
 -0.757653 -0.744112 0.294776 
 -0.756378 -0.744112 0.291045 
 -0.753827 -0.744112 0.283582 
 -0.751276 -0.744112 0.279851 
 -0.750000 -0.744112 0.287313 
 -0.748724 -0.744112 0.305970 
 -0.747449 -0.744112 0.332090 
 -0.760204 -0.743530 0.257463 
 -0.758929 -0.743530 0.253731 
 -0.757653 -0.743530 0.250000 
 -0.756378 -0.743530 0.246269 
 -0.753827 -0.743530 0.242537 
 -0.751276 -0.743530 0.242537 
 -0.750000 -0.743530 0.261194 
 -0.748724 -0.743530 0.291045 
 -0.747449 -0.743530 0.317164 
 -0.758929 -0.743530 0.253731 
 -0.757653 -0.743530 0.250000 
 -0.756378 -0.743530 0.246269 
 -0.755102 -0.743530 0.242537 
 -0.752551 -0.743530 0.238806 
 -0.750000 -0.743530 0.261194 
 -0.748724 -0.743530 0.291045 
 -0.747449 -0.743530 0.317164 
 -0.746173 -0.743530 0.347015 
 -0.758929 -0.742949 0.208955 
 -0.757653 -0.742949 0.205224 
 -0.756378 -0.742949 0.201493 
 -0.755102 -0.742949 0.201493 
 -0.752551 -0.742949 0.197761 
 -0.750000 -0.742949 0.238806 
 -0.748724 -0.742949 0.272388 
 -0.747449 -0.742949 0.302239 
 -0.746173 -0.742949 0.332090 
 -0.758929 -0.742367 0.179104 
 -0.757653 -0.742367 0.175373 
 -0.756378 -0.742367 0.175373 
 -0.755102 -0.742367 0.171642 
 -0.752551 -0.742367 0.164179 
 -0.750000 -0.742367 0.223881 
 -0.748724 -0.742367 0.257463 
 -0.747449 -0.742367 0.291045 
 -0.746173 -0.742367 0.320896 
 -0.757653 -0.742367 0.175373 
 -0.756378 -0.742367 0.175373 
 -0.755102 -0.742367 0.171642 
 -0.753827 -0.742367 0.164179 
 -0.751276 -0.742367 0.186567 
 -0.748724 -0.742367 0.257463 
 -0.747449 -0.742367 0.291045 
 -0.746173 -0.742367 0.320896 
 -0.744898 -0.742367 0.347015 
 -0.757653 -0.741785 0.130597 
 -0.756378 -0.741785 0.130597 
 -0.755102 -0.741785 0.130597 
 -0.753827 -0.741785 0.130597 
 -0.751276 -0.741785 0.160448 
 -0.748724 -0.741785 0.238806 
 -0.747449 -0.741785 0.272388 
 -0.746173 -0.741785 0.302239 
 -0.744898 -0.741785 0.332090 
 -0.757653 -0.741204 0.104478 
 -0.756378 -0.741204 0.100746 
 -0.755102 -0.741204 0.104478 
 -0.753827 -0.741204 0.111940 
 -0.751276 -0.741204 0.152985 
 -0.748724 -0.741204 0.227612 
 -0.747449 -0.741204 0.261194 
 -0.746173 -0.741204 0.291045 
 -0.744898 -0.741204 0.320896 
 -0.756378 -0.741204 0.100746 
 -0.755102 -0.741204 0.104478 
 -0.753827 -0.741204 0.111940 
 -0.752551 -0.741204 0.130597 
 -0.750000 -0.741204 0.190299 
 -0.747449 -0.741204 0.261194 
 -0.746173 -0.741204 0.291045 
 -0.744898 -0.741204 0.320896 
 -0.743622 -0.741204 0.350746 
 -0.756378 -0.740622 0.055970 
 -0.755102 -0.740622 0.063433 
 -0.753827 -0.740622 0.097015 
 -0.752551 -0.740622 0.119403 
 -0.750000 -0.740622 0.167910 
 -0.747449 -0.740622 0.242537 
 -0.746173 -0.740622 0.276119 
 -0.744898 -0.740622 0.305970 
 -0.743622 -0.740622 0.335821 
 -0.756378 -0.740041 0.033582 
 -0.755102 -0.740041 0.055970 
 -0.753827 -0.740041 0.085821 
 -0.752551 -0.740041 0.108209 
 -0.750000 -0.740041 0.156716 
 -0.747449 -0.740041 0.231343 
 -0.746173 -0.740041 0.264925 
 -0.744898 -0.740041 0.294776 
 -0.743622 -0.740041 0.324627 
 -0.755102 -0.740041 0.055970 
 -0.753827 -0.740041 0.085821 
 -0.752551 -0.740041 0.108209 
 -0.751276 -0.740041 0.134328 
 -0.748724 -0.740041 0.194030 
 -0.746173 -0.740041 0.264925 
 -0.744898 -0.740041 0.294776 
 -0.743622 -0.740041 0.324627 
 -0.742347 -0.740041 0.354478 
 -0.755102 -0.739459 0.048507 
 -0.753827 -0.739459 0.074627 
 -0.752551 -0.739459 0.100746 
 -0.751276 -0.739459 0.123134 
 -0.748724 -0.739459 0.175373 
 -0.746173 -0.739459 0.250000 
 -0.744898 -0.739459 0.276119 
 -0.743622 -0.739459 0.305970 
 -0.742347 -0.739459 0.339552 
 -0.755102 -0.738878 0.026119 
 -0.753827 -0.738878 0.059701 
 -0.752551 -0.738878 0.085821 
 -0.751276 -0.738878 0.111940 
 -0.748724 -0.738878 0.164179 
 -0.746173 -0.738878 0.235075 
 -0.744898 -0.738878 0.264925 
 -0.743622 -0.738878 0.294776 
 -0.742347 -0.738878 0.324627 
 -0.753827 -0.738878 0.059701 
 -0.752551 -0.738878 0.085821 
 -0.751276 -0.738878 0.111940 
 -0.750000 -0.738878 0.138060 
 -0.747449 -0.738878 0.197761 
 -0.744898 -0.738878 0.264925 
 -0.743622 -0.738878 0.294776 
 -0.742347 -0.738878 0.324627 
 -0.741071 -0.738878 0.350746 
 -0.753827 -0.738296 0.044776 
 -0.752551 -0.738296 0.074627 
 -0.751276 -0.738296 0.100746 
 -0.750000 -0.738296 0.126866 
 -0.747449 -0.738296 0.186567 
 -0.744898 -0.738296 0.253731 
 -0.743622 -0.738296 0.279851 
 -0.742347 -0.738296 0.309701 
 -0.741071 -0.738296 0.339552 
 -0.753827 -0.737714 0.022388 
 -0.752551 -0.737714 0.055970 
 -0.751276 -0.737714 0.082090 
 -0.750000 -0.737714 0.108209 
 -0.747449 -0.737714 0.167910 
 -0.744898 -0.737714 0.231343 
 -0.743622 -0.737714 0.261194 
 -0.742347 -0.737714 0.287313 
 -0.741071 -0.737714 0.309701 
 -0.752551 -0.737714 0.055970 
 -0.751276 -0.737714 0.082090 
 -0.750000 -0.737714 0.108209 
 -0.748724 -0.737714 0.138060 
 -0.746173 -0.737714 0.197761 
 -0.743622 -0.737714 0.261194 
 -0.742347 -0.737714 0.287313 
 -0.741071 -0.737714 0.309701 
 -0.739796 -0.737714 0.328358 
 -0.752551 -0.737133 0.037313 
 -0.751276 -0.737133 0.070896 
 -0.750000 -0.737133 0.097015 
 -0.748724 -0.737133 0.123134 
 -0.746173 -0.737133 0.186567 
 -0.743622 -0.737133 0.246269 
 -0.742347 -0.737133 0.268657 
 -0.741071 -0.737133 0.291045 
 -0.739796 -0.737133 0.305970 
 -0.752551 -0.736551 0.014925 
 -0.751276 -0.736551 0.044776 
 -0.750000 -0.736551 0.074627 
 -0.748724 -0.736551 0.100746 
 -0.746173 -0.736551 0.164179 
 -0.743622 -0.736551 0.216418 
 -0.742347 -0.736551 0.246269 
 -0.741071 -0.736551 0.264925 
 -0.739796 -0.736551 0.279851 
 -0.751276 -0.736551 0.044776 
 -0.750000 -0.736551 0.074627 
 -0.748724 -0.736551 0.100746 
 -0.747449 -0.736551 0.130597 
 -0.744898 -0.736551 0.190299 
 -0.742347 -0.736551 0.246269 
 -0.741071 -0.736551 0.264925 
 -0.739796 -0.736551 0.279851 
 -0.738520 -0.736551 0.291045 
 -0.751276 -0.735970 0.029851 
 -0.750000 -0.735970 0.059701 
 -0.748724 -0.735970 0.085821 
 -0.747449 -0.735970 0.115672 
 -0.744898 -0.735970 0.175373 
 -0.742347 -0.735970 0.223881 
 -0.741071 -0.735970 0.250000 
 -0.739796 -0.735970 0.261194 
 -0.738520 -0.735970 0.272388 
 -0.751276 -0.735388 0.007463 
 -0.750000 -0.735388 0.033582 
 -0.748724 -0.735388 0.059701 
 -0.747449 -0.735388 0.085821 
 -0.744898 -0.735388 0.149254 
 -0.742347 -0.735388 0.194030 
 -0.741071 -0.735388 0.212687 
 -0.739796 -0.735388 0.227612 
 -0.738520 -0.735388 0.235075 
 -0.750000 -0.735388 0.033582 
 -0.748724 -0.735388 0.059701 
 -0.747449 -0.735388 0.085821 
 -0.746173 -0.735388 0.119403 
 -0.743622 -0.735388 0.171642 
 -0.741071 -0.735388 0.212687 
 -0.739796 -0.735388 0.227612 
 -0.738520 -0.735388 0.235075 
 -0.737245 -0.735388 0.238806 
 -0.750000 -0.734807 0.014925 
 -0.748724 -0.734807 0.041045 
 -0.747449 -0.734807 0.067164 
 -0.746173 -0.734807 0.097015 
 -0.743622 -0.734807 0.152985 
 -0.741071 -0.734807 0.186567 
 -0.739796 -0.734807 0.194030 
 -0.738520 -0.734807 0.201493 
 -0.737245 -0.734807 0.212687 
 -0.750000 -0.734225 -0.007463 
 -0.748724 -0.734225 0.014925 
 -0.747449 -0.734225 0.041045 
 -0.746173 -0.734225 0.067164 
 -0.743622 -0.734225 0.108209 
 -0.741071 -0.734225 0.134328 
 -0.739796 -0.734225 0.138060 
 -0.738520 -0.734225 0.152985 
 -0.737245 -0.734225 0.167910 
 -0.748724 -0.734225 0.014925 
 -0.747449 -0.734225 0.041045 
 -0.746173 -0.734225 0.067164 
 -0.744898 -0.734225 0.085821 
 -0.742347 -0.734225 0.126866 
 -0.739796 -0.734225 0.138060 
 -0.738520 -0.734225 0.152985 
 -0.737245 -0.734225 0.167910 
 -0.735969 -0.734225 0.160448 
 -0.748724 -0.733644 -0.003731 
 -0.747449 -0.733644 0.018657 
 -0.746173 -0.733644 0.041045 
 -0.744898 -0.733644 0.059701 
 -0.742347 -0.733644 0.093284 
 -0.739796 -0.733644 0.104478 
 -0.738520 -0.733644 0.119403 
 -0.737245 -0.733644 0.138060 
 -0.735969 -0.733644 0.138060 
 -0.748724 -0.733062 -0.044776 
 -0.747449 -0.733062 -0.026119 
 -0.746173 -0.733062 -0.011194 
 -0.744898 -0.733062 0.003731 
 -0.742347 -0.733062 0.022388 
 -0.739796 -0.733062 0.052239 
 -0.738520 -0.733062 0.074627 
 -0.737245 -0.733062 0.093284 
 -0.735969 -0.733062 0.100746 
 -0.747449 -0.733062 -0.026119 
 -0.746173 -0.733062 -0.011194 
 -0.744898 -0.733062 0.003731 
 -0.743622 -0.733062 0.014925 
 -0.741071 -0.733062 0.033582 
 -0.738520 -0.733062 0.074627 
 -0.737245 -0.733062 0.093284 
 -0.735969 -0.733062 0.100746 
 -0.734694 -0.733062 0.085821 
 -0.747449 -0.732480 -0.059701 
 -0.746173 -0.732480 -0.044776 
 -0.744898 -0.732480 -0.033582 
 -0.743622 -0.732480 -0.033582 
 -0.741071 -0.732480 -0.007463 
 -0.738520 -0.732480 0.044776 
 -0.737245 -0.732480 0.067164 
 -0.735969 -0.732480 0.074627 
 -0.734694 -0.732480 0.063433 
 -0.747449 -0.731899 -0.097015 
 -0.746173 -0.731899 -0.067164 
 -0.744898 -0.731899 -0.063433 
 -0.743622 -0.731899 -0.067164 
 -0.741071 -0.731899 -0.048507 
 -0.738520 -0.731899 0.007463 
 -0.737245 -0.731899 0.033582 
 -0.735969 -0.731899 0.029851 
 -0.734694 -0.731899 0.022388 
 -0.746173 -0.731899 -0.067164 
 -0.744898 -0.731899 -0.063433 
 -0.743622 -0.731899 -0.067164 
 -0.742347 -0.731899 -0.070896 
 -0.739796 -0.731899 -0.018657 
 -0.737245 -0.731899 0.033582 
 -0.735969 -0.731899 0.029851 
 -0.734694 -0.731899 0.022388 
 -0.733418 -0.731899 0.018657 
 -0.746173 -0.731317 -0.082090 
 -0.744898 -0.731317 -0.082090 
 -0.743622 -0.731317 -0.097015 
 -0.742347 -0.731317 -0.097015 
 -0.739796 -0.731317 -0.037313 
 -0.737245 -0.731317 0.007463 
 -0.735969 -0.731317 0.000000 
 -0.734694 -0.731317 -0.007463 
 -0.733418 -0.731317 -0.007463 
 -0.746173 -0.730736 -0.100746 
 -0.744898 -0.730736 -0.104478 
 -0.743622 -0.730736 -0.138060 
 -0.742347 -0.730736 -0.130597 
 -0.739796 -0.730736 -0.067164 
 -0.737245 -0.730736 -0.029851 
 -0.735969 -0.730736 -0.037313 
 -0.734694 -0.730736 -0.044776 
 -0.733418 -0.730736 -0.044776 
 -0.744898 -0.730736 -0.104478 
 -0.743622 -0.730736 -0.138060 
 -0.742347 -0.730736 -0.130597 
 -0.741071 -0.730736 -0.104478 
 -0.738520 -0.730736 -0.037313 
 -0.735969 -0.730736 -0.037313 
 -0.734694 -0.730736 -0.044776 
 -0.733418 -0.730736 -0.044776 
 -0.732143 -0.730736 -0.048507 
 -0.744898 -0.730154 -0.141791 
 -0.743622 -0.730154 -0.160448 
 -0.742347 -0.730154 -0.145522 
 -0.741071 -0.730154 -0.123134 
 -0.738520 -0.730154 -0.055970 
 -0.735969 -0.730154 -0.055970 
 -0.734694 -0.730154 -0.067164 
 -0.733418 -0.730154 -0.070896 
 -0.732143 -0.730154 -0.070896 
 -0.744898 -0.729573 -0.167910 
 -0.743622 -0.729573 -0.175373 
 -0.742347 -0.729573 -0.156716 
 -0.741071 -0.729573 -0.130597 
 -0.738520 -0.729573 -0.067164 
 -0.735969 -0.729573 -0.070896 
 -0.734694 -0.729573 -0.093284 
 -0.733418 -0.729573 -0.093284 
 -0.732143 -0.729573 -0.093284 
 -0.743622 -0.729573 -0.175373 
 -0.742347 -0.729573 -0.156716 
 -0.741071 -0.729573 -0.130597 
 -0.739796 -0.729573 -0.097015 
 -0.737245 -0.729573 -0.055970 
 -0.734694 -0.729573 -0.093284 
 -0.733418 -0.729573 -0.093284 
 -0.732143 -0.729573 -0.093284 
 -0.730867 -0.729573 -0.100746 
 -0.743622 -0.728991 -0.197761 
 -0.742347 -0.728991 -0.167910 
 -0.741071 -0.728991 -0.138060 
 -0.739796 -0.728991 -0.108209 
 -0.737245 -0.728991 -0.063433 
 -0.734694 -0.728991 -0.104478 
 -0.733418 -0.728991 -0.123134 
 -0.732143 -0.728991 -0.126866 
 -0.730867 -0.728991 -0.130597 
 -0.743622 -0.728409 -0.205224 
 -0.742347 -0.728409 -0.175373 
 -0.741071 -0.728409 -0.141791 
 -0.739796 -0.728409 -0.115672 
 -0.737245 -0.728409 -0.067164 
 -0.734694 -0.728409 -0.097015 
 -0.733418 -0.728409 -0.126866 
 -0.732143 -0.728409 -0.149254 
 -0.730867 -0.728409 -0.156716 
 -0.742347 -0.728409 -0.175373 
 -0.741071 -0.728409 -0.141791 
 -0.739796 -0.728409 -0.115672 
 -0.738520 -0.728409 -0.082090 
 -0.735969 -0.728409 -0.078358 
 -0.733418 -0.728409 -0.126866 
 -0.732143 -0.728409 -0.149254 
 -0.730867 -0.728409 -0.156716 
 -0.729592 -0.728409 -0.160448 
 -0.742347 -0.727828 -0.175373 
 -0.741071 -0.727828 -0.145522 
 -0.739796 -0.727828 -0.115672 
 -0.738520 -0.727828 -0.085821 
 -0.735969 -0.727828 -0.063433 
 -0.733418 -0.727828 -0.115672 
 -0.732143 -0.727828 -0.145522 
 -0.730867 -0.727828 -0.167910 
 -0.729592 -0.727828 -0.190299 
 -0.742347 -0.727246 -0.171642 
 -0.741071 -0.727246 -0.141791 
 -0.739796 -0.727246 -0.115672 
 -0.738520 -0.727246 -0.082090 
 -0.735969 -0.727246 -0.063433 
 -0.733418 -0.727246 -0.108209 
 -0.732143 -0.727246 -0.138060 
 -0.730867 -0.727246 -0.164179 
 -0.729592 -0.727246 -0.190299 
 -0.741071 -0.727246 -0.141791 
 -0.739796 -0.727246 -0.115672 
 -0.738520 -0.727246 -0.082090 
 -0.737245 -0.727246 -0.063433 
 -0.734694 -0.727246 -0.078358 
 -0.732143 -0.727246 -0.138060 
 -0.730867 -0.727246 -0.164179 
 -0.729592 -0.727246 -0.190299 
 -0.728316 -0.727246 -0.216418 
 -0.741071 -0.726665 -0.141791 
 -0.739796 -0.726665 -0.111940 
 -0.738520 -0.726665 -0.082090 
 -0.737245 -0.726665 -0.063433 
 -0.734694 -0.726665 -0.070896 
 -0.732143 -0.726665 -0.134328 
 -0.730867 -0.726665 -0.160448 
 -0.729592 -0.726665 -0.186567 
 -0.728316 -0.726665 -0.212687 
 -0.741071 -0.726083 -0.141791 
 -0.739796 -0.726083 -0.108209 
 -0.738520 -0.726083 -0.082090 
 -0.737245 -0.726083 -0.063433 
 -0.734694 -0.726083 -0.070896 
 -0.732143 -0.726083 -0.134328 
 -0.730867 -0.726083 -0.160448 
 -0.729592 -0.726083 -0.190299 
 -0.728316 -0.726083 -0.216418 
 -0.739796 -0.726083 -0.108209 
 -0.738520 -0.726083 -0.082090 
 -0.737245 -0.726083 -0.063433 
 -0.735969 -0.726083 -0.063433 
 -0.733418 -0.726083 -0.093284 
 -0.730867 -0.726083 -0.160448 
 -0.729592 -0.726083 -0.190299 
 -0.728316 -0.726083 -0.216418 
 -0.727041 -0.726083 -0.246269 
 -0.739796 -0.725502 -0.115672 
 -0.738520 -0.725502 -0.089552 
 -0.737245 -0.725502 -0.074627 
 -0.735969 -0.725502 -0.074627 
 -0.733418 -0.725502 -0.100746 
 -0.730867 -0.725502 -0.171642 
 -0.729592 -0.725502 -0.201493 
 -0.728316 -0.725502 -0.227612 
 -0.727041 -0.725502 -0.250000 
 -0.739796 -0.724920 -0.119403 
 -0.738520 -0.724920 -0.097015 
 -0.737245 -0.724920 -0.089552 
 -0.735969 -0.724920 -0.093284 
 -0.733418 -0.724920 -0.115672 
 -0.730867 -0.724920 -0.179104 
 -0.729592 -0.724920 -0.208955 
 -0.728316 -0.724920 -0.235075 
 -0.727041 -0.724920 -0.257463 
 -0.738520 -0.724920 -0.097015 
 -0.737245 -0.724920 -0.089552 
 -0.735969 -0.724920 -0.093284 
 -0.734694 -0.724920 -0.100746 
 -0.732143 -0.724920 -0.149254 
 -0.729592 -0.724920 -0.208955 
 -0.728316 -0.724920 -0.235075 
 -0.727041 -0.724920 -0.257463 
 -0.725765 -0.724920 -0.279851 
 -0.738520 -0.724338 -0.111940 
 -0.737245 -0.724338 -0.108209 
 -0.735969 -0.724338 -0.119403 
 -0.734694 -0.724338 -0.130597 
 -0.732143 -0.724338 -0.167910 
 -0.729592 -0.724338 -0.223881 
 -0.728316 -0.724338 -0.246269 
 -0.727041 -0.724338 -0.268657 
 -0.725765 -0.724338 -0.291045 
 -0.738520 -0.723757 -0.119403 
 -0.737245 -0.723757 -0.119403 
 -0.735969 -0.723757 -0.130597 
 -0.734694 -0.723757 -0.152985 
 -0.732143 -0.723757 -0.186567 
 -0.729592 -0.723757 -0.235075 
 -0.728316 -0.723757 -0.257463 
 -0.727041 -0.723757 -0.276119 
 -0.725765 -0.723757 -0.298507 
 -0.738520 -0.723175 -0.138060 
 -0.737245 -0.723175 -0.138060 
 -0.735969 -0.723175 -0.141791 
 -0.734694 -0.723175 -0.164179 
 -0.732143 -0.723175 -0.212687 
 -0.729592 -0.723175 -0.253731 
 -0.728316 -0.723175 -0.276119 
 -0.727041 -0.723175 -0.294776 
 -0.725765 -0.723175 -0.313433 
 -0.737245 -0.723175 -0.138060 
 -0.735969 -0.723175 -0.141791 
 -0.734694 -0.723175 -0.164179 
 -0.733418 -0.723175 -0.186567 
 -0.730867 -0.723175 -0.235075 
 -0.728316 -0.723175 -0.276119 
 -0.727041 -0.723175 -0.294776 
 -0.725765 -0.723175 -0.313433 
 -0.724490 -0.723175 -0.332090 
 -0.737245 -0.722594 -0.145522 
 -0.735969 -0.722594 -0.149254 
 -0.734694 -0.722594 -0.164179 
 -0.733418 -0.722594 -0.190299 
 -0.730867 -0.722594 -0.242537 
 -0.728316 -0.722594 -0.287313 
 -0.727041 -0.722594 -0.309701 
 -0.725765 -0.722594 -0.324627 
 -0.724490 -0.722594 -0.339552 
 -0.737245 -0.722012 -0.171642 
 -0.735969 -0.722012 -0.164179 
 -0.734694 -0.722012 -0.171642 
 -0.733418 -0.722012 -0.194030 
 -0.730867 -0.722012 -0.242537 
 -0.728316 -0.722012 -0.291045 
 -0.727041 -0.722012 -0.317164 
 -0.725765 -0.722012 -0.339552 
 -0.724490 -0.722012 -0.354478 
 -0.735969 -0.722012 -0.164179 
 -0.734694 -0.722012 -0.171642 
 -0.733418 -0.722012 -0.194030 
 -0.732143 -0.722012 -0.212687 
 -0.729592 -0.722012 -0.268657 
 -0.727041 -0.722012 -0.317164 
 -0.725765 -0.722012 -0.339552 
 -0.724490 -0.722012 -0.354478 
 -0.723214 -0.722012 -0.361940 
 -0.735969 -0.721431 -0.179104 
 -0.734694 -0.721431 -0.179104 
 -0.733418 -0.721431 -0.194030 
 -0.732143 -0.721431 -0.216418 
 -0.729592 -0.721431 -0.272388 
 -0.727041 -0.721431 -0.320896 
 -0.725765 -0.721431 -0.343284 
 -0.724490 -0.721431 -0.361940 
 -0.723214 -0.721431 -0.373134 
 -0.735969 -0.720849 -0.186567 
 -0.734694 -0.720849 -0.186567 
 -0.733418 -0.720849 -0.201493 
 -0.732143 -0.720849 -0.223881 
 -0.729592 -0.720849 -0.276119 
 -0.727041 -0.720849 -0.324627 
 -0.725765 -0.720849 -0.347015 
 -0.724490 -0.720849 -0.373134 
 -0.723214 -0.720849 -0.380597 
 -0.734694 -0.720849 -0.186567 
 -0.733418 -0.720849 -0.201493 
 -0.732143 -0.720849 -0.223881 
 -0.730867 -0.720849 -0.253731 
 -0.728316 -0.720849 -0.298507 
 -0.725765 -0.720849 -0.347015 
 -0.724490 -0.720849 -0.373134 
 -0.723214 -0.720849 -0.380597 
 -0.721939 -0.720849 -0.380597 
 -0.734694 -0.720268 -0.194030 
 -0.733418 -0.720268 -0.208955 
 -0.732143 -0.720268 -0.235075 
 -0.730867 -0.720268 -0.261194 
 -0.728316 -0.720268 -0.309701 
 -0.725765 -0.720268 -0.358209 
 -0.724490 -0.720268 -0.380597 
 -0.723214 -0.720268 -0.399254 
 -0.721939 -0.720268 -0.395522 
 -0.734694 -0.719686 -0.201493 
 -0.733418 -0.719686 -0.212687 
 -0.732143 -0.719686 -0.242537 
 -0.730867 -0.719686 -0.268657 
 -0.728316 -0.719686 -0.317164 
 -0.725765 -0.719686 -0.365672 
 -0.724490 -0.719686 -0.388060 
 -0.723214 -0.719686 -0.406716 
 -0.721939 -0.719686 -0.399254 
 -0.733418 -0.719686 -0.212687 
 -0.732143 -0.719686 -0.242537 
 -0.730867 -0.719686 -0.268657 
 -0.729592 -0.719686 -0.294776 
 -0.727041 -0.719686 -0.339552 
 -0.724490 -0.719686 -0.388060 
 -0.723214 -0.719686 -0.406716 
 -0.721939 -0.719686 -0.399254 
 -0.720663 -0.719686 -0.391791 
 -0.733418 -0.719104 -0.223881 
 -0.732143 -0.719104 -0.253731 
 -0.730867 -0.719104 -0.276119 
 -0.729592 -0.719104 -0.309701 
 -0.727041 -0.719104 -0.350746 
 -0.724490 -0.719104 -0.395522 
 -0.723214 -0.719104 -0.417910 
 -0.721939 -0.719104 -0.414179 
 -0.720663 -0.719104 -0.402985 
 -0.733418 -0.718523 -0.227612 
 -0.732143 -0.718523 -0.257463 
 -0.730867 -0.718523 -0.283582 
 -0.729592 -0.718523 -0.317164 
 -0.727041 -0.718523 -0.358209 
 -0.724490 -0.718523 -0.402985 
 -0.723214 -0.718523 -0.425373 
 -0.721939 -0.718523 -0.429104 
 -0.720663 -0.718523 -0.414179 
 -0.732143 -0.718523 -0.257463 
 -0.730867 -0.718523 -0.283582 
 -0.729592 -0.718523 -0.317164 
 -0.728316 -0.718523 -0.335821 
 -0.725765 -0.718523 -0.380597 
 -0.723214 -0.718523 -0.425373 
 -0.721939 -0.718523 -0.429104 
 -0.720663 -0.718523 -0.414179 
 -0.719388 -0.718523 -0.406716 
 -0.732143 -0.717941 -0.261194 
 -0.730867 -0.717941 -0.287313 
 -0.729592 -0.717941 -0.320896 
 -0.728316 -0.717941 -0.343284 
 -0.725765 -0.717941 -0.388060 
 -0.723214 -0.717941 -0.432836 
 -0.721939 -0.717941 -0.436567 
 -0.720663 -0.717941 -0.436567 
 -0.719388 -0.717941 -0.425373 
 -0.732143 -0.717360 -0.257463 
 -0.730867 -0.717360 -0.291045 
 -0.729592 -0.717360 -0.320896 
 -0.728316 -0.717360 -0.343284 
 -0.725765 -0.717360 -0.391791 
 -0.723214 -0.717360 -0.440299 
 -0.721939 -0.717360 -0.447761 
 -0.720663 -0.717360 -0.451493 
 -0.719388 -0.717360 -0.432836 
 -0.730867 -0.717360 -0.291045 
 -0.729592 -0.717360 -0.320896 
 -0.728316 -0.717360 -0.343284 
 -0.727041 -0.717360 -0.369403 
 -0.724490 -0.717360 -0.414179 
 -0.721939 -0.717360 -0.447761 
 -0.720663 -0.717360 -0.451493 
 -0.719388 -0.717360 -0.432836 
 -0.718112 -0.717360 -0.425373 
 -0.730867 -0.716778 -0.291045 
 -0.729592 -0.716778 -0.317164 
 -0.728316 -0.716778 -0.343284 
 -0.727041 -0.716778 -0.369403 
 -0.724490 -0.716778 -0.421642 
 -0.721939 -0.716778 -0.458955 
 -0.720663 -0.716778 -0.458955 
 -0.719388 -0.716778 -0.447761 
 -0.718112 -0.716778 -0.440299 
 -0.730867 -0.716197 -0.294776 
 -0.729592 -0.716197 -0.320896 
 -0.728316 -0.716197 -0.347015 
 -0.727041 -0.716197 -0.373134 
 -0.724490 -0.716197 -0.425373 
 -0.721939 -0.716197 -0.470149 
 -0.720663 -0.716197 -0.470149 
 -0.719388 -0.716197 -0.455224 
 -0.718112 -0.716197 -0.447761 
 -0.729592 -0.716197 -0.320896 
 -0.728316 -0.716197 -0.347015 
 -0.727041 -0.716197 -0.373134 
 -0.725765 -0.716197 -0.399254 
 -0.723214 -0.716197 -0.451493 
 -0.720663 -0.716197 -0.470149 
 -0.719388 -0.716197 -0.455224 
 -0.718112 -0.716197 -0.447761 
 -0.716837 -0.716197 -0.432836 
 -0.729592 -0.715615 -0.339552 
 -0.728316 -0.715615 -0.358209 
 -0.727041 -0.715615 -0.384328 
 -0.725765 -0.715615 -0.406716 
 -0.723214 -0.715615 -0.458955 
 -0.720663 -0.715615 -0.477612 
 -0.719388 -0.715615 -0.466418 
 -0.718112 -0.715615 -0.451493 
 -0.716837 -0.715615 -0.436567 
 -0.729592 -0.715033 -0.358209 
 -0.728316 -0.715033 -0.376866 
 -0.727041 -0.715033 -0.395522 
 -0.725765 -0.715033 -0.417910 
 -0.723214 -0.715033 -0.466418 
 -0.720663 -0.715033 -0.481343 
 -0.719388 -0.715033 -0.466418 
 -0.718112 -0.715033 -0.451493 
 -0.716837 -0.715033 -0.432836 
 -0.728316 -0.715033 -0.376866 
 -0.727041 -0.715033 -0.395522 
 -0.725765 -0.715033 -0.417910 
 -0.724490 -0.715033 -0.444030 
 -0.721939 -0.715033 -0.488806 
 -0.719388 -0.715033 -0.466418 
 -0.718112 -0.715033 -0.451493 
 -0.716837 -0.715033 -0.432836 
 -0.715561 -0.715033 -0.417910 
 -0.728316 -0.714452 -0.406716 
 -0.727041 -0.714452 -0.421642 
 -0.725765 -0.714452 -0.440299 
 -0.724490 -0.714452 -0.466418 
 -0.721939 -0.714452 -0.492537 
 -0.719388 -0.714452 -0.470149 
 -0.718112 -0.714452 -0.451493 
 -0.716837 -0.714452 -0.432836 
 -0.715561 -0.714452 -0.414179 
 -0.728316 -0.713870 -0.425373 
 -0.727041 -0.713870 -0.440299 
 -0.725765 -0.713870 -0.455224 
 -0.724490 -0.713870 -0.477612 
 -0.721939 -0.713870 -0.503731 
 -0.719388 -0.713870 -0.477612 
 -0.718112 -0.713870 -0.455224 
 -0.716837 -0.713870 -0.436567 
 -0.715561 -0.713870 -0.414179 
 -0.727041 -0.713870 -0.440299 
 -0.725765 -0.713870 -0.455224 
 -0.724490 -0.713870 -0.477612 
 -0.723214 -0.713870 -0.500000 
 -0.720663 -0.713870 -0.496269 
 -0.718112 -0.713870 -0.455224 
 -0.716837 -0.713870 -0.436567 
 -0.715561 -0.713870 -0.414179 
 -0.714286 -0.713870 -0.391791 
 -0.727041 -0.713289 -0.451493 
 -0.725765 -0.713289 -0.470149 
 -0.724490 -0.713289 -0.485075 
 -0.723214 -0.713289 -0.507463 
 -0.720663 -0.713289 -0.503731 
 -0.718112 -0.713289 -0.466418 
 -0.716837 -0.713289 -0.440299 
 -0.715561 -0.713289 -0.414179 
 -0.714286 -0.713289 -0.391791 
 -0.727041 -0.712707 -0.455224 
 -0.725765 -0.712707 -0.477612 
 -0.724490 -0.712707 -0.492537 
 -0.723214 -0.712707 -0.511194 
 -0.720663 -0.712707 -0.507463 
 -0.718112 -0.712707 -0.470149 
 -0.716837 -0.712707 -0.444030 
 -0.715561 -0.712707 -0.417910 
 -0.714286 -0.712707 -0.395522 
 -0.725765 -0.712707 -0.477612 
 -0.724490 -0.712707 -0.492537 
 -0.723214 -0.712707 -0.511194 
 -0.721939 -0.712707 -0.511194 
 -0.719388 -0.712707 -0.496269 
 -0.716837 -0.712707 -0.444030 
 -0.715561 -0.712707 -0.417910 
 -0.714286 -0.712707 -0.395522 
 -0.713010 -0.712707 -0.380597 
 -0.725765 -0.712126 -0.485075 
 -0.724490 -0.712126 -0.503731 
 -0.723214 -0.712126 -0.518657 
 -0.721939 -0.712126 -0.522388 
 -0.719388 -0.712126 -0.496269 
 -0.716837 -0.712126 -0.451493 
 -0.715561 -0.712126 -0.429104 
 -0.714286 -0.712126 -0.402985 
 -0.713010 -0.712126 -0.391791 
 -0.725765 -0.711544 -0.500000 
 -0.724490 -0.711544 -0.526119 
 -0.723214 -0.711544 -0.529851 
 -0.721939 -0.711544 -0.526119 
 -0.719388 -0.711544 -0.492537 
 -0.716837 -0.711544 -0.462687 
 -0.715561 -0.711544 -0.447761 
 -0.714286 -0.711544 -0.432836 
 -0.713010 -0.711544 -0.417910 
 -0.724490 -0.711544 -0.526119 
 -0.723214 -0.711544 -0.529851 
 -0.721939 -0.711544 -0.526119 
 -0.720663 -0.711544 -0.511194 
 -0.718112 -0.711544 -0.477612 
 -0.715561 -0.711544 -0.447761 
 -0.714286 -0.711544 -0.432836 
 -0.713010 -0.711544 -0.417910 
 -0.711735 -0.711544 -0.402985 
 -0.724490 -0.710962 -0.537313 
 -0.723214 -0.710962 -0.533582 
 -0.721939 -0.710962 -0.526119 
 -0.720663 -0.710962 -0.511194 
 -0.718112 -0.710962 -0.477612 
 -0.715561 -0.710962 -0.447761 
 -0.714286 -0.710962 -0.432836 
 -0.713010 -0.710962 -0.414179 
 -0.711735 -0.710962 -0.399254 
 -0.724490 -0.710381 -0.548507 
 -0.723214 -0.710381 -0.541045 
 -0.721939 -0.710381 -0.529851 
 -0.720663 -0.710381 -0.511194 
 -0.718112 -0.710381 -0.473881 
 -0.715561 -0.710381 -0.436567 
 -0.714286 -0.710381 -0.421642 
 -0.713010 -0.710381 -0.402985 
 -0.711735 -0.710381 -0.384328 
 -0.723214 -0.710381 -0.541045 
 -0.721939 -0.710381 -0.529851 
 -0.720663 -0.710381 -0.511194 
 -0.719388 -0.710381 -0.492537 
 -0.716837 -0.710381 -0.455224 
 -0.714286 -0.710381 -0.421642 
 -0.713010 -0.710381 -0.402985 
 -0.711735 -0.710381 -0.384328 
 -0.710459 -0.710381 -0.365672 
 -0.723214 -0.709799 -0.544776 
 -0.721939 -0.709799 -0.529851 
 -0.720663 -0.709799 -0.514925 
 -0.719388 -0.709799 -0.496269 
 -0.716837 -0.709799 -0.455224 
 -0.714286 -0.709799 -0.414179 
 -0.713010 -0.709799 -0.395522 
 -0.711735 -0.709799 -0.373134 
 -0.710459 -0.709799 -0.354478 
 -0.723214 -0.709218 -0.552239 
 -0.721939 -0.709218 -0.537313 
 -0.720663 -0.709218 -0.518657 
 -0.719388 -0.709218 -0.503731 
 -0.716837 -0.709218 -0.455224 
 -0.714286 -0.709218 -0.406716 
 -0.713010 -0.709218 -0.384328 
 -0.711735 -0.709218 -0.361940 
 -0.710459 -0.709218 -0.339552 
 -0.721939 -0.709218 -0.537313 
 -0.720663 -0.709218 -0.518657 
 -0.719388 -0.709218 -0.503731 
 -0.718112 -0.709218 -0.481343 
 -0.715561 -0.709218 -0.432836 
 -0.713010 -0.709218 -0.384328 
 -0.711735 -0.709218 -0.361940 
 -0.710459 -0.709218 -0.339552 
 -0.709184 -0.709218 -0.320896 
 -0.721939 -0.708636 -0.537313 
 -0.720663 -0.708636 -0.522388 
 -0.719388 -0.708636 -0.503731 
 -0.718112 -0.708636 -0.485075 
 -0.715561 -0.708636 -0.432836 
 -0.713010 -0.708636 -0.380597 
 -0.711735 -0.708636 -0.358209 
 -0.710459 -0.708636 -0.335821 
 -0.709184 -0.708636 -0.313433 
 -0.721939 -0.708055 -0.541045 
 -0.720663 -0.708055 -0.526119 
 -0.719388 -0.708055 -0.507463 
 -0.718112 -0.708055 -0.488806 
 -0.715561 -0.708055 -0.436567 
 -0.713010 -0.708055 -0.384328 
 -0.711735 -0.708055 -0.361940 
 -0.710459 -0.708055 -0.339552 
 -0.709184 -0.708055 -0.317164 
 -0.720663 -0.708055 -0.526119 
 -0.719388 -0.708055 -0.507463 
 -0.718112 -0.708055 -0.488806 
 -0.716837 -0.708055 -0.462687 
 -0.714286 -0.708055 -0.410448 
 -0.711735 -0.708055 -0.361940 
 -0.710459 -0.708055 -0.339552 
 -0.709184 -0.708055 -0.317164 
 -0.707908 -0.708055 -0.298507 
 -0.720663 -0.707473 -0.526119 
 -0.719388 -0.707473 -0.507463 
 -0.718112 -0.707473 -0.488806 
 -0.716837 -0.707473 -0.462687 
 -0.714286 -0.707473 -0.417910 
 -0.711735 -0.707473 -0.373134 
 -0.710459 -0.707473 -0.350746 
 -0.709184 -0.707473 -0.328358 
 -0.707908 -0.707473 -0.305970 
 -0.720663 -0.706892 -0.529851 
 -0.719388 -0.706892 -0.511194 
 -0.718112 -0.706892 -0.492537 
 -0.716837 -0.706892 -0.470149 
 -0.714286 -0.706892 -0.429104 
 -0.711735 -0.706892 -0.391791 
 -0.710459 -0.706892 -0.365672 
 -0.709184 -0.706892 -0.343284 
 -0.707908 -0.706892 -0.320896 
 -0.719388 -0.706892 -0.511194 
 -0.718112 -0.706892 -0.492537 
 -0.716837 -0.706892 -0.470149 
 -0.715561 -0.706892 -0.451493 
 -0.713010 -0.706892 -0.410448 
 -0.710459 -0.706892 -0.365672 
 -0.709184 -0.706892 -0.343284 
 -0.707908 -0.706892 -0.320896 
 -0.706633 -0.706892 -0.298507 
 -0.719388 -0.706310 -0.511194 
 -0.718112 -0.706310 -0.496269 
 -0.716837 -0.706310 -0.473881 
 -0.715561 -0.706310 -0.455224 
 -0.713010 -0.706310 -0.417910 
 -0.710459 -0.706310 -0.373134 
 -0.709184 -0.706310 -0.347015 
 -0.707908 -0.706310 -0.320896 
 -0.706633 -0.706310 -0.298507 
 -0.719388 -0.705728 -0.514925 
 -0.718112 -0.705728 -0.496269 
 -0.716837 -0.705728 -0.477612 
 -0.715561 -0.705728 -0.455224 
 -0.713010 -0.705728 -0.406716 
 -0.710459 -0.705728 -0.361940 
 -0.709184 -0.705728 -0.335821 
 -0.707908 -0.705728 -0.313433 
 -0.706633 -0.705728 -0.291045 
 -0.718112 -0.705728 -0.496269 
 -0.716837 -0.705728 -0.477612 
 -0.715561 -0.705728 -0.455224 
 -0.714286 -0.705728 -0.429104 
 -0.711735 -0.705728 -0.384328 
 -0.709184 -0.705728 -0.335821 
 -0.707908 -0.705728 -0.313433 
 -0.706633 -0.705728 -0.291045 
 -0.705357 -0.705728 -0.268657 
 -0.718112 -0.705147 -0.500000 
 -0.716837 -0.705147 -0.473881 
 -0.715561 -0.705147 -0.447761 
 -0.714286 -0.705147 -0.425373 
 -0.711735 -0.705147 -0.376866 
 -0.709184 -0.705147 -0.328358 
 -0.707908 -0.705147 -0.305970 
 -0.706633 -0.705147 -0.283582 
 -0.705357 -0.705147 -0.261194 
 -0.718112 -0.704565 -0.500000 
 -0.716837 -0.704565 -0.473881 
 -0.715561 -0.704565 -0.444030 
 -0.714286 -0.704565 -0.417910 
 -0.711735 -0.704565 -0.365672 
 -0.709184 -0.704565 -0.317164 
 -0.707908 -0.704565 -0.294776 
 -0.706633 -0.704565 -0.272388 
 -0.705357 -0.704565 -0.250000 
 -0.716837 -0.704565 -0.473881 
 -0.715561 -0.704565 -0.444030 
 -0.714286 -0.704565 -0.417910 
 -0.713010 -0.704565 -0.391791 
 -0.710459 -0.704565 -0.339552 
 -0.707908 -0.704565 -0.294776 
 -0.706633 -0.704565 -0.272388 
 -0.705357 -0.704565 -0.250000 
 -0.704082 -0.704565 -0.227612 
 -0.716837 -0.703984 -0.473881 
 -0.715561 -0.703984 -0.444030 
 -0.714286 -0.703984 -0.414179 
 -0.713010 -0.703984 -0.388060 
 -0.710459 -0.703984 -0.335821 
 -0.707908 -0.703984 -0.287313 
 -0.706633 -0.703984 -0.264925 
 -0.705357 -0.703984 -0.238806 
 -0.704082 -0.703984 -0.216418 
 -0.716837 -0.703402 -0.477612 
 -0.715561 -0.703402 -0.447761 
 -0.714286 -0.703402 -0.417910 
 -0.713010 -0.703402 -0.388060 
 -0.710459 -0.703402 -0.335821 
 -0.707908 -0.703402 -0.283582 
 -0.706633 -0.703402 -0.261194 
 -0.705357 -0.703402 -0.238806 
 -0.704082 -0.703402 -0.216418 
 -0.715561 -0.702821 -0.458955 
 -0.714286 -0.702821 -0.429104 
 -0.713010 -0.702821 -0.399254 
 -0.711735 -0.702821 -0.373134 
 -0.709184 -0.702821 -0.317164 
 -0.706633 -0.702821 -0.272388 
 -0.705357 -0.702821 -0.250000 
 -0.704082 -0.702821 -0.238806 
 -0.702806 -0.702821 -0.231343 
 -0.715561 -0.702239 -0.470149 
 -0.714286 -0.702239 -0.440299 
 -0.713010 -0.702239 -0.410448 
 -0.711735 -0.702239 -0.380597 
 -0.709184 -0.702239 -0.328358 
 -0.706633 -0.702239 -0.279851 
 -0.705357 -0.702239 -0.268657 
 -0.704082 -0.702239 -0.268657 
 -0.702806 -0.702239 -0.264925 
 -0.715561 -0.701657 -0.481343 
 -0.714286 -0.701657 -0.451493 
 -0.713010 -0.701657 -0.425373 
 -0.711735 -0.701657 -0.395522 
 -0.709184 -0.701657 -0.347015 
 -0.706633 -0.701657 -0.313433 
 -0.705357 -0.701657 -0.309701 
 -0.704082 -0.701657 -0.317164 
 -0.702806 -0.701657 -0.320896 
 -0.714286 -0.701657 -0.451493 
 -0.713010 -0.701657 -0.425373 
 -0.711735 -0.701657 -0.395522 
 -0.710459 -0.701657 -0.369403 
 -0.707908 -0.701657 -0.324627 
 -0.705357 -0.701657 -0.309701 
 -0.704082 -0.701657 -0.317164 
 -0.702806 -0.701657 -0.320896 
 -0.701531 -0.701657 -0.309701 
 -0.714286 -0.701076 -0.462687 
 -0.713010 -0.701076 -0.436567 
 -0.711735 -0.701076 -0.410448 
 -0.710459 -0.701076 -0.388060 
 -0.707908 -0.701076 -0.358209 
 -0.705357 -0.701076 -0.354478 
 -0.704082 -0.701076 -0.350746 
 -0.702806 -0.701076 -0.350746 
 -0.701531 -0.701076 -0.332090 
 -0.714286 -0.700494 -0.481343 
 -0.713010 -0.700494 -0.458955 
 -0.711735 -0.700494 -0.440299 
 -0.710459 -0.700494 -0.425373 
 -0.707908 -0.700494 -0.410448 
 -0.705357 -0.700494 -0.410448 
 -0.704082 -0.700494 -0.402985 
 -0.702806 -0.700494 -0.391791 
 -0.701531 -0.700494 -0.373134 
 -0.713010 -0.700494 -0.458955 
 -0.711735 -0.700494 -0.440299 
 -0.710459 -0.700494 -0.425373 
 -0.709184 -0.700494 -0.414179 
 -0.706633 -0.700494 -0.410448 
 -0.704082 -0.700494 -0.402985 
 -0.702806 -0.700494 -0.391791 
 -0.701531 -0.700494 -0.373134 
 -0.700255 -0.700494 -0.354478 
 -0.713010 -0.699913 -0.481343 
 -0.711735 -0.699913 -0.466418 
 -0.710459 -0.699913 -0.455224 
 -0.709184 -0.699913 -0.447761 
 -0.706633 -0.699913 -0.440299 
 -0.704082 -0.699913 -0.429104 
 -0.702806 -0.699913 -0.417910 
 -0.701531 -0.699913 -0.402985 
 -0.700255 -0.699913 -0.391791 
 -0.713010 -0.699331 -0.518657 
 -0.711735 -0.699331 -0.507463 
 -0.710459 -0.699331 -0.500000 
 -0.709184 -0.699331 -0.496269 
 -0.706633 -0.699331 -0.485075 
 -0.704082 -0.699331 -0.470149 
 -0.702806 -0.699331 -0.458955 
 -0.701531 -0.699331 -0.447761 
 -0.700255 -0.699331 -0.436567 
 -0.711735 -0.699331 -0.507463 
 -0.710459 -0.699331 -0.500000 
 -0.709184 -0.699331 -0.496269 
 -0.707908 -0.699331 -0.488806 
 -0.705357 -0.699331 -0.477612 
 -0.702806 -0.699331 -0.458955 
 -0.701531 -0.699331 -0.447761 
 -0.700255 -0.699331 -0.436567 
 -0.698980 -0.699331 -0.425373 
 -0.711735 -0.698750 -0.529851 
 -0.710459 -0.698750 -0.526119 
 -0.709184 -0.698750 -0.518657 
 -0.707908 -0.698750 -0.511194 
 -0.705357 -0.698750 -0.503731 
 -0.702806 -0.698750 -0.485075 
 -0.701531 -0.698750 -0.473881 
 -0.700255 -0.698750 -0.466418 
 -0.698980 -0.698750 -0.455224 
 -0.711735 -0.698168 -0.567164 
 -0.710459 -0.698168 -0.559701 
 -0.709184 -0.698168 -0.552239 
 -0.707908 -0.698168 -0.544776 
 -0.705357 -0.698168 -0.529851 
 -0.702806 -0.698168 -0.514925 
 -0.701531 -0.698168 -0.511194 
 -0.700255 -0.698168 -0.503731 
 -0.698980 -0.698168 -0.492537 
 -0.710459 -0.698168 -0.559701 
 -0.709184 -0.698168 -0.552239 
 -0.707908 -0.698168 -0.544776 
 -0.706633 -0.698168 -0.541045 
 -0.704082 -0.698168 -0.522388 
 -0.701531 -0.698168 -0.511194 
 -0.700255 -0.698168 -0.503731 
 -0.698980 -0.698168 -0.492537 
 -0.697704 -0.698168 -0.477612 
 -0.710459 -0.697587 -0.582090 
 -0.709184 -0.697587 -0.574627 
 -0.707908 -0.697587 -0.567164 
 -0.706633 -0.697587 -0.559701 
 -0.704082 -0.697587 -0.541045 
 -0.701531 -0.697587 -0.529851 
 -0.700255 -0.697587 -0.522388 
 -0.698980 -0.697587 -0.507463 
 -0.697704 -0.697587 -0.492537 
 -0.710459 -0.697005 -0.611940 
 -0.709184 -0.697005 -0.604478 
 -0.707908 -0.697005 -0.597015 
 -0.706633 -0.697005 -0.585821 
 -0.704082 -0.697005 -0.570896 
 -0.701531 -0.697005 -0.555970 
 -0.700255 -0.697005 -0.544776 
 -0.698980 -0.697005 -0.529851 
 -0.697704 -0.697005 -0.511194 
 -0.709184 -0.697005 -0.604478 
 -0.707908 -0.697005 -0.597015 
 -0.706633 -0.697005 -0.585821 
 -0.705357 -0.697005 -0.578358 
 -0.702806 -0.697005 -0.563433 
 -0.700255 -0.697005 -0.544776 
 -0.698980 -0.697005 -0.529851 
 -0.697704 -0.697005 -0.511194 
 -0.696429 -0.697005 -0.492537 
 -0.709184 -0.696423 -0.623134 
 -0.707908 -0.696423 -0.611940 
 -0.706633 -0.696423 -0.604478 
 -0.705357 -0.696423 -0.597015 
 -0.702806 -0.696423 -0.582090 
 -0.700255 -0.696423 -0.559701 
 -0.698980 -0.696423 -0.541045 
 -0.697704 -0.696423 -0.522388 
 -0.696429 -0.696423 -0.503731 
 -0.709184 -0.695842 -0.645522 
 -0.707908 -0.695842 -0.634328 
 -0.706633 -0.695842 -0.626866 
 -0.705357 -0.695842 -0.619403 
 -0.702806 -0.695842 -0.604478 
 -0.700255 -0.695842 -0.585821 
 -0.698980 -0.695842 -0.563433 
 -0.697704 -0.695842 -0.544776 
 -0.696429 -0.695842 -0.522388 
 -0.707908 -0.695842 -0.634328 
 -0.706633 -0.695842 -0.626866 
 -0.705357 -0.695842 -0.619403 
 -0.704082 -0.695842 -0.611940 
 -0.701531 -0.695842 -0.597015 
 -0.698980 -0.695842 -0.563433 
 -0.697704 -0.695842 -0.544776 
 -0.696429 -0.695842 -0.522388 
 -0.695153 -0.695842 -0.503731 
 -0.707908 -0.695260 -0.649254 
 -0.706633 -0.695260 -0.641791 
 -0.705357 -0.695260 -0.630597 
 -0.704082 -0.695260 -0.623134 
 -0.701531 -0.695260 -0.608209 
 -0.698980 -0.695260 -0.578358 
 -0.697704 -0.695260 -0.555970 
 -0.696429 -0.695260 -0.537313 
 -0.695153 -0.695260 -0.518657 
 -0.707908 -0.694679 -0.664179 
 -0.706633 -0.694679 -0.652985 
 -0.705357 -0.694679 -0.645522 
 -0.704082 -0.694679 -0.638060 
 -0.701531 -0.694679 -0.623134 
 -0.698980 -0.694679 -0.597015 
 -0.697704 -0.694679 -0.578358 
 -0.696429 -0.694679 -0.559701 
 -0.695153 -0.694679 -0.541045 
 -0.706633 -0.694679 -0.652985 
 -0.705357 -0.694679 -0.645522 
 -0.704082 -0.694679 -0.638060 
 -0.702806 -0.694679 -0.634328 
 -0.700255 -0.694679 -0.611940 
 -0.697704 -0.694679 -0.578358 
 -0.696429 -0.694679 -0.559701 
 -0.695153 -0.694679 -0.541045 
 -0.693878 -0.694679 -0.529851 
 -0.706633 -0.694097 -0.671642 
 -0.705357 -0.694097 -0.664179 
 -0.704082 -0.694097 -0.656716 
 -0.702806 -0.694097 -0.645522 
 -0.700255 -0.694097 -0.623134 
 -0.697704 -0.694097 -0.589552 
 -0.696429 -0.694097 -0.570896 
 -0.695153 -0.694097 -0.555970 
 -0.693878 -0.694097 -0.544776 
 -0.706633 -0.693516 -0.682836 
 -0.705357 -0.693516 -0.675373 
 -0.704082 -0.693516 -0.667910 
 -0.702806 -0.693516 -0.660448 
 -0.700255 -0.693516 -0.641791 
 -0.697704 -0.693516 -0.608209 
 -0.696429 -0.693516 -0.585821 
 -0.695153 -0.693516 -0.570896 
 -0.693878 -0.693516 -0.563433 
 -0.705357 -0.693516 -0.675373 
 -0.704082 -0.693516 -0.667910 
 -0.702806 -0.693516 -0.660448 
 -0.701531 -0.693516 -0.649254 
 -0.698980 -0.693516 -0.626866 
 -0.696429 -0.693516 -0.585821 
 -0.695153 -0.693516 -0.570896 
 -0.693878 -0.693516 -0.563433 
 -0.692602 -0.693516 -0.559701 
 -0.705357 -0.692934 -0.697761 
 -0.704082 -0.692934 -0.690299 
 -0.702806 -0.692934 -0.682836 
 -0.701531 -0.692934 -0.679104 
 -0.698980 -0.692934 -0.667910 
 -0.696429 -0.692934 -0.619403 
 -0.695153 -0.692934 -0.600746 
 -0.693878 -0.692934 -0.585821 
 -0.692602 -0.692934 -0.582090 
 -0.705357 -0.692352 -0.708955 
 -0.704082 -0.692352 -0.705224 
 -0.702806 -0.692352 -0.697761 
 -0.701531 -0.692352 -0.694030 
 -0.698980 -0.692352 -0.686567 
 -0.696429 -0.692352 -0.645522 
 -0.695153 -0.692352 -0.626866 
 -0.693878 -0.692352 -0.611940 
 -0.692602 -0.692352 -0.604478 
 -0.704082 -0.692352 -0.705224 
 -0.702806 -0.692352 -0.697761 
 -0.701531 -0.692352 -0.694030 
 -0.700255 -0.692352 -0.694030 
 -0.697704 -0.692352 -0.667910 
 -0.695153 -0.692352 -0.626866 
 -0.693878 -0.692352 -0.611940 
 -0.692602 -0.692352 -0.604478 
 -0.691327 -0.692352 -0.600746 
 -0.704082 -0.691771 -0.720149 
 -0.702806 -0.691771 -0.716418 
 -0.701531 -0.691771 -0.716418 
 -0.700255 -0.691771 -0.708955 
 -0.697704 -0.691771 -0.690299 
 -0.695153 -0.691771 -0.656716 
 -0.693878 -0.691771 -0.641791 
 -0.692602 -0.691771 -0.626866 
 -0.691327 -0.691771 -0.623134 
 -0.704082 -0.691189 -0.731343 
 -0.702806 -0.691189 -0.727612 
 -0.701531 -0.691189 -0.723881 
 -0.700255 -0.691189 -0.720149 
 -0.697704 -0.691189 -0.705224 
 -0.695153 -0.691189 -0.675373 
 -0.693878 -0.691189 -0.656716 
 -0.692602 -0.691189 -0.641791 
 -0.691327 -0.691189 -0.638060 
 -0.702806 -0.691189 -0.727612 
 -0.701531 -0.691189 -0.723881 
 -0.700255 -0.691189 -0.720149 
 -0.698980 -0.691189 -0.712687 
 -0.696429 -0.691189 -0.690299 
 -0.693878 -0.691189 -0.656716 
 -0.692602 -0.691189 -0.641791 
 -0.691327 -0.691189 -0.638060 
 -0.690051 -0.691189 -0.641791 
 -0.702806 -0.690608 -0.742537 
 -0.701531 -0.690608 -0.738806 
 -0.700255 -0.690608 -0.735075 
 -0.698980 -0.690608 -0.735075 
 -0.696429 -0.690608 -0.716418 
 -0.693878 -0.690608 -0.679104 
 -0.692602 -0.690608 -0.667910 
 -0.691327 -0.690608 -0.660448 
 -0.690051 -0.690608 -0.664179 
 -0.702806 -0.690026 -0.750000 
 -0.701531 -0.690026 -0.746269 
 -0.700255 -0.690026 -0.746269 
 -0.698980 -0.690026 -0.750000 
 -0.696429 -0.690026 -0.742537 
 -0.693878 -0.690026 -0.708955 
 -0.692602 -0.690026 -0.686567 
 -0.691327 -0.690026 -0.675373 
 -0.690051 -0.690026 -0.675373 
 -0.701531 -0.690026 -0.746269 
 -0.700255 -0.690026 -0.746269 
 -0.698980 -0.690026 -0.750000 
 -0.697704 -0.690026 -0.753731 
 -0.695153 -0.690026 -0.723881 
 -0.692602 -0.690026 -0.686567 
 -0.691327 -0.690026 -0.675373 
 -0.690051 -0.690026 -0.675373 
 -0.688776 -0.690026 -0.682836 
 -0.701531 -0.689445 -0.761194 
 -0.700255 -0.689445 -0.761194 
 -0.698980 -0.689445 -0.761194 
 -0.697704 -0.689445 -0.761194 
 -0.695153 -0.689445 -0.757463 
 -0.692602 -0.689445 -0.723881 
 -0.691327 -0.689445 -0.705224 
 -0.690051 -0.689445 -0.701493 
 -0.688776 -0.689445 -0.708955 
 -0.701531 -0.688863 -0.772388 
 -0.700255 -0.688863 -0.768657 
 -0.698980 -0.688863 -0.768657 
 -0.697704 -0.688863 -0.764925 
 -0.695153 -0.688863 -0.757463 
 -0.692602 -0.688863 -0.735075 
 -0.691327 -0.688863 -0.720149 
 -0.690051 -0.688863 -0.716418 
 -0.688776 -0.688863 -0.731343 
 -0.700255 -0.688863 -0.768657 
 -0.698980 -0.688863 -0.768657 
 -0.697704 -0.688863 -0.764925 
 -0.696429 -0.688863 -0.761194 
 -0.693878 -0.688863 -0.757463 
 -0.691327 -0.688863 -0.720149 
 -0.690051 -0.688863 -0.716418 
 -0.688776 -0.688863 -0.731343 
 -0.687500 -0.688863 -0.746269 
 -0.700255 -0.688281 -0.783582 
 -0.698980 -0.688281 -0.779851 
 -0.697704 -0.688281 -0.779851 
 -0.696429 -0.688281 -0.772388 
 -0.693878 -0.688281 -0.757463 
 -0.691327 -0.688281 -0.735075 
 -0.690051 -0.688281 -0.735075 
 -0.688776 -0.688281 -0.753731 
 -0.687500 -0.688281 -0.753731 
 -0.700255 -0.687700 -0.787313 
 -0.698980 -0.687700 -0.791045 
 -0.697704 -0.687700 -0.787313 
 -0.696429 -0.687700 -0.779851 
 -0.693878 -0.687700 -0.764925 
 -0.691327 -0.687700 -0.738806 
 -0.690051 -0.687700 -0.750000 
 -0.688776 -0.687700 -0.768657 
 -0.687500 -0.687700 -0.761194 
 -0.698980 -0.687700 -0.791045 
 -0.697704 -0.687700 -0.787313 
 -0.696429 -0.687700 -0.779851 
 -0.695153 -0.687700 -0.772388 
 -0.692602 -0.687700 -0.750000 
 -0.690051 -0.687700 -0.750000 
 -0.688776 -0.687700 -0.768657 
 -0.687500 -0.687700 -0.761194 
 -0.686224 -0.687700 -0.742537 
 -0.698980 -0.687118 -0.791045 
 -0.697704 -0.687118 -0.791045 
 -0.696429 -0.687118 -0.791045 
 -0.695153 -0.687118 -0.783582 
 -0.692602 -0.687118 -0.772388 
 -0.690051 -0.687118 -0.764925 
 -0.688776 -0.687118 -0.772388 
 -0.687500 -0.687118 -0.768657 
 -0.686224 -0.687118 -0.750000 
 -0.698980 -0.686537 -0.791045 
 -0.697704 -0.686537 -0.791045 
 -0.696429 -0.686537 -0.791045 
 -0.695153 -0.686537 -0.794776 
 -0.692602 -0.686537 -0.787313 
 -0.690051 -0.686537 -0.772388 
 -0.688776 -0.686537 -0.783582 
 -0.687500 -0.686537 -0.779851 
 -0.686224 -0.686537 -0.753731 
 -0.697704 -0.685955 -0.791045 
 -0.696429 -0.685955 -0.794776 
 -0.695153 -0.685955 -0.802239 
 -0.693878 -0.685955 -0.809701 
 -0.691327 -0.685955 -0.794776 
 -0.688776 -0.685955 -0.791045 
 -0.687500 -0.685955 -0.783582 
 -0.686224 -0.685955 -0.761194 
 -0.684949 -0.685955 -0.738806 
 -0.697704 -0.685374 -0.787313 
 -0.696429 -0.685374 -0.794776 
 -0.695153 -0.685374 -0.802239 
 -0.693878 -0.685374 -0.809701 
 -0.691327 -0.685374 -0.805970 
 -0.688776 -0.685374 -0.791045 
 -0.687500 -0.685374 -0.779851 
 -0.686224 -0.685374 -0.757463 
 -0.684949 -0.685374 -0.738806 
 -0.697704 -0.684792 -0.783582 
 -0.696429 -0.684792 -0.794776 
 -0.695153 -0.684792 -0.802239 
 -0.693878 -0.684792 -0.809701 
 -0.691327 -0.684792 -0.809701 
 -0.688776 -0.684792 -0.787313 
 -0.687500 -0.684792 -0.776119 
 -0.686224 -0.684792 -0.764925 
 -0.684949 -0.684792 -0.746269 
 -0.696429 -0.684792 -0.794776 
 -0.695153 -0.684792 -0.802239 
 -0.693878 -0.684792 -0.809701 
 -0.692602 -0.684792 -0.809701 
 -0.690051 -0.684792 -0.809701 
 -0.687500 -0.684792 -0.776119 
 -0.686224 -0.684792 -0.764925 
 -0.684949 -0.684792 -0.746269 
 -0.683673 -0.684792 -0.731343 
 -0.696429 -0.684211 -0.787313 
 -0.695153 -0.684211 -0.798507 
 -0.693878 -0.684211 -0.805970 
 -0.692602 -0.684211 -0.809701 
 -0.690051 -0.684211 -0.813433 
 -0.687500 -0.684211 -0.791045 
 -0.686224 -0.684211 -0.779851 
 -0.684949 -0.684211 -0.768657 
 -0.683673 -0.684211 -0.753731 
 -0.696429 -0.683629 -0.783582 
 -0.695153 -0.683629 -0.794776 
 -0.693878 -0.683629 -0.809701 
 -0.692602 -0.683629 -0.817164 
 -0.690051 -0.683629 -0.824627 
 -0.687500 -0.683629 -0.817164 
 -0.686224 -0.683629 -0.802239 
 -0.684949 -0.683629 -0.783582 
 -0.683673 -0.683629 -0.768657 
 -0.695153 -0.683629 -0.794776 
 -0.693878 -0.683629 -0.809701 
 -0.692602 -0.683629 -0.817164 
 -0.691327 -0.683629 -0.820896 
 -0.688776 -0.683629 -0.824627 
 -0.686224 -0.683629 -0.802239 
 -0.684949 -0.683629 -0.783582 
 -0.683673 -0.683629 -0.768657 
 -0.682398 -0.683629 -0.753731 
 -0.695153 -0.683047 -0.791045 
 -0.693878 -0.683047 -0.802239 
 -0.692602 -0.683047 -0.813433 
 -0.691327 -0.683047 -0.820896 
 -0.688776 -0.683047 -0.828358 
 -0.686224 -0.683047 -0.828358 
 -0.684949 -0.683047 -0.817164 
 -0.683673 -0.683047 -0.802239 
 -0.682398 -0.683047 -0.783582 
 -0.695153 -0.682466 -0.783582 
 -0.693878 -0.682466 -0.798507 
 -0.692602 -0.682466 -0.809701 
 -0.691327 -0.682466 -0.817164 
 -0.688776 -0.682466 -0.824627 
 -0.686224 -0.682466 -0.828358 
 -0.684949 -0.682466 -0.828358 
 -0.683673 -0.682466 -0.820896 
 -0.682398 -0.682466 -0.802239 
 -0.693878 -0.682466 -0.798507 
 -0.692602 -0.682466 -0.809701 
 -0.691327 -0.682466 -0.817164 
 -0.690051 -0.682466 -0.820896 
 -0.687500 -0.682466 -0.828358 
 -0.684949 -0.682466 -0.828358 
 -0.683673 -0.682466 -0.820896 
 -0.682398 -0.682466 -0.802239 
 -0.681122 -0.682466 -0.787313 
 -0.693878 -0.681884 -0.791045 
 -0.692602 -0.681884 -0.805970 
 -0.691327 -0.681884 -0.813433 
 -0.690051 -0.681884 -0.817164 
 -0.687500 -0.681884 -0.828358 
 -0.684949 -0.681884 -0.828358 
 -0.683673 -0.681884 -0.828358 
 -0.682398 -0.681884 -0.828358 
 -0.681122 -0.681884 -0.809701 
 -0.693878 -0.681303 -0.787313 
 -0.692602 -0.681303 -0.798507 
 -0.691327 -0.681303 -0.813433 
 -0.690051 -0.681303 -0.817164 
 -0.687500 -0.681303 -0.828358 
 -0.684949 -0.681303 -0.828358 
 -0.683673 -0.681303 -0.828358 
 -0.682398 -0.681303 -0.832090 
 -0.681122 -0.681303 -0.824627 
 -0.692602 -0.681303 -0.798507 
 -0.691327 -0.681303 -0.813433 
 -0.690051 -0.681303 -0.817164 
 -0.688776 -0.681303 -0.824627 
 -0.686224 -0.681303 -0.828358 
 -0.683673 -0.681303 -0.828358 
 -0.682398 -0.681303 -0.832090 
 -0.681122 -0.681303 -0.824627 
 -0.679847 -0.681303 -0.809701 
 -0.692602 -0.680721 -0.794776 
 -0.691327 -0.680721 -0.809701 
 -0.690051 -0.680721 -0.817164 
 -0.688776 -0.680721 -0.820896 
 -0.686224 -0.680721 -0.832090 
 -0.683673 -0.680721 -0.839552 
 -0.682398 -0.680721 -0.843284 
 -0.681122 -0.680721 -0.835821 
 -0.679847 -0.680721 -0.820896 
 -0.692602 -0.680140 -0.794776 
 -0.691327 -0.680140 -0.805970 
 -0.690051 -0.680140 -0.813433 
 -0.688776 -0.680140 -0.820896 
 -0.686224 -0.680140 -0.835821 
 -0.683673 -0.680140 -0.843284 
 -0.682398 -0.680140 -0.847015 
 -0.681122 -0.680140 -0.843284 
 -0.679847 -0.680140 -0.824627 
 -0.691327 -0.680140 -0.805970 
 -0.690051 -0.680140 -0.813433 
 -0.688776 -0.680140 -0.820896 
 -0.687500 -0.680140 -0.828358 
 -0.684949 -0.680140 -0.839552 
 -0.682398 -0.680140 -0.847015 
 -0.681122 -0.680140 -0.843284 
 -0.679847 -0.680140 -0.824627 
 -0.678571 -0.680140 -0.813433 
 -0.691327 -0.679558 -0.798507 
 -0.690051 -0.679558 -0.809701 
 -0.688776 -0.679558 -0.820896 
 -0.687500 -0.679558 -0.828358 
 -0.684949 -0.679558 -0.839552 
 -0.682398 -0.679558 -0.847015 
 -0.681122 -0.679558 -0.847015 
 -0.679847 -0.679558 -0.847015 
 -0.678571 -0.679558 -0.828358 
 -0.691327 -0.678976 -0.794776 
 -0.690051 -0.678976 -0.805970 
 -0.688776 -0.678976 -0.817164 
 -0.687500 -0.678976 -0.828358 
 -0.684949 -0.678976 -0.839552 
 -0.682398 -0.678976 -0.843284 
 -0.681122 -0.678976 -0.847015 
 -0.679847 -0.678976 -0.847015 
 -0.678571 -0.678976 -0.843284 
 -0.690051 -0.678976 -0.805970 
 -0.688776 -0.678976 -0.817164 
 -0.687500 -0.678976 -0.828358 
 -0.686224 -0.678976 -0.835821 
 -0.683673 -0.678976 -0.839552 
 -0.681122 -0.678976 -0.847015 
 -0.679847 -0.678976 -0.847015 
 -0.678571 -0.678976 -0.843284 
 -0.677296 -0.678976 -0.828358 
 -0.690051 -0.678395 -0.798507 
 -0.688776 -0.678395 -0.813433 
 -0.687500 -0.678395 -0.828358 
 -0.686224 -0.678395 -0.832090 
 -0.683673 -0.678395 -0.843284 
 -0.681122 -0.678395 -0.847015 
 -0.679847 -0.678395 -0.847015 
 -0.678571 -0.678395 -0.847015 
 -0.677296 -0.678395 -0.847015 
 -0.690051 -0.677813 -0.787313 
 -0.688776 -0.677813 -0.805970 
 -0.687500 -0.677813 -0.824627 
 -0.686224 -0.677813 -0.832090 
 -0.683673 -0.677813 -0.843284 
 -0.681122 -0.677813 -0.847015 
 -0.679847 -0.677813 -0.847015 
 -0.678571 -0.677813 -0.847015 
 -0.677296 -0.677813 -0.850746 
 -0.688776 -0.677813 -0.805970 
 -0.687500 -0.677813 -0.824627 
 -0.686224 -0.677813 -0.832090 
 -0.684949 -0.677813 -0.835821 
 -0.682398 -0.677813 -0.847015 
 -0.679847 -0.677813 -0.847015 
 -0.678571 -0.677813 -0.847015 
 -0.677296 -0.677813 -0.850746 
 -0.676020 -0.677813 -0.850746 
 -0.688776 -0.677232 -0.791045 
 -0.687500 -0.677232 -0.813433 
 -0.686224 -0.677232 -0.832090 
 -0.684949 -0.677232 -0.835821 
 -0.682398 -0.677232 -0.843284 
 -0.679847 -0.677232 -0.850746 
 -0.678571 -0.677232 -0.850746 
 -0.677296 -0.677232 -0.850746 
 -0.676020 -0.677232 -0.850746 
 -0.688776 -0.676650 -0.787313 
 -0.687500 -0.676650 -0.805970 
 -0.686224 -0.676650 -0.824627 
 -0.684949 -0.676650 -0.832090 
 -0.682398 -0.676650 -0.843284 
 -0.679847 -0.676650 -0.850746 
 -0.678571 -0.676650 -0.850746 
 -0.677296 -0.676650 -0.850746 
 -0.676020 -0.676650 -0.850746 
 -0.687500 -0.676650 -0.805970 
 -0.686224 -0.676650 -0.824627 
 -0.684949 -0.676650 -0.832090 
 -0.683673 -0.676650 -0.839552 
 -0.681122 -0.676650 -0.850746 
 -0.678571 -0.676650 -0.850746 
 -0.677296 -0.676650 -0.850746 
 -0.676020 -0.676650 -0.850746 
 -0.674745 -0.676650 -0.850746 
 -0.687500 -0.676069 -0.802239 
 -0.686224 -0.676069 -0.817164 
 -0.684949 -0.676069 -0.832090 
 -0.683673 -0.676069 -0.835821 
 -0.681122 -0.676069 -0.850746 
 -0.678571 -0.676069 -0.854478 
 -0.677296 -0.676069 -0.854478 
 -0.676020 -0.676069 -0.854478 
 -0.674745 -0.676069 -0.858209 
 -0.687500 -0.675487 -0.791045 
 -0.686224 -0.675487 -0.813433 
 -0.684949 -0.675487 -0.828358 
 -0.683673 -0.675487 -0.835821 
 -0.681122 -0.675487 -0.847015 
 -0.678571 -0.675487 -0.854478 
 -0.677296 -0.675487 -0.858209 
 -0.676020 -0.675487 -0.858209 
 -0.674745 -0.675487 -0.861940 
 -0.686224 -0.675487 -0.813433 
 -0.684949 -0.675487 -0.828358 
 -0.683673 -0.675487 -0.835821 
 -0.682398 -0.675487 -0.843284 
 -0.679847 -0.675487 -0.850746 
 -0.677296 -0.675487 -0.858209 
 -0.676020 -0.675487 -0.858209 
 -0.674745 -0.675487 -0.861940 
 -0.673469 -0.675487 -0.865672 
 -0.686224 -0.674905 -0.805970 
 -0.684949 -0.674905 -0.824627 
 -0.683673 -0.674905 -0.835821 
 -0.682398 -0.674905 -0.839552 
 -0.679847 -0.674905 -0.850746 
 -0.677296 -0.674905 -0.858209 
 -0.676020 -0.674905 -0.861940 
 -0.674745 -0.674905 -0.861940 
 -0.673469 -0.674905 -0.865672 
 -0.686224 -0.674324 -0.794776 
 -0.684949 -0.674324 -0.817164 
 -0.683673 -0.674324 -0.832090 
 -0.682398 -0.674324 -0.839552 
 -0.679847 -0.674324 -0.850746 
 -0.677296 -0.674324 -0.858209 
 -0.676020 -0.674324 -0.861940 
 -0.674745 -0.674324 -0.865672 
 -0.673469 -0.674324 -0.865672 
 -0.684949 -0.674324 -0.817164 
 -0.683673 -0.674324 -0.832090 
 -0.682398 -0.674324 -0.839552 
 -0.681122 -0.674324 -0.847015 
 -0.678571 -0.674324 -0.854478 
 -0.676020 -0.674324 -0.861940 
 -0.674745 -0.674324 -0.865672 
 -0.673469 -0.674324 -0.865672 
 -0.672194 -0.674324 -0.865672 
 -0.684949 -0.673742 -0.813433 
 -0.683673 -0.673742 -0.828358 
 -0.682398 -0.673742 -0.835821 
 -0.681122 -0.673742 -0.847015 
 -0.678571 -0.673742 -0.858209 
 -0.676020 -0.673742 -0.865672 
 -0.674745 -0.673742 -0.865672 
 -0.673469 -0.673742 -0.865672 
 -0.672194 -0.673742 -0.865672 
 -0.684949 -0.673161 -0.809701 
 -0.683673 -0.673161 -0.824627 
 -0.682398 -0.673161 -0.835821 
 -0.681122 -0.673161 -0.847015 
 -0.678571 -0.673161 -0.858209 
 -0.676020 -0.673161 -0.865672 
 -0.674745 -0.673161 -0.865672 
 -0.673469 -0.673161 -0.865672 
 -0.672194 -0.673161 -0.865672 
 -0.683673 -0.673161 -0.824627 
 -0.682398 -0.673161 -0.835821 
 -0.681122 -0.673161 -0.847015 
 -0.679847 -0.673161 -0.854478 
 -0.677296 -0.673161 -0.865672 
 -0.674745 -0.673161 -0.865672 
 -0.673469 -0.673161 -0.865672 
 -0.672194 -0.673161 -0.865672 
 -0.670918 -0.673161 -0.865672 
 -0.683673 -0.672579 -0.824627 
 -0.682398 -0.672579 -0.839552 
 -0.681122 -0.672579 -0.850746 
 -0.679847 -0.672579 -0.854478 
 -0.677296 -0.672579 -0.865672 
 -0.674745 -0.672579 -0.865672 
 -0.673469 -0.672579 -0.865672 
 -0.672194 -0.672579 -0.865672 
 -0.670918 -0.672579 -0.865672 
 -0.683673 -0.671998 -0.828358 
 -0.682398 -0.671998 -0.843284 
 -0.681122 -0.671998 -0.850746 
 -0.679847 -0.671998 -0.858209 
 -0.677296 -0.671998 -0.865672 
 -0.674745 -0.671998 -0.865672 
 -0.673469 -0.671998 -0.865672 
 -0.672194 -0.671998 -0.865672 
 -0.670918 -0.671998 -0.865672 
 -0.683673 -0.671416 -0.839552 
 -0.682398 -0.671416 -0.847015 
 -0.681122 -0.671416 -0.854478 
 -0.679847 -0.671416 -0.858209 
 -0.677296 -0.671416 -0.865672 
 -0.674745 -0.671416 -0.865672 
 -0.673469 -0.671416 -0.865672 
 -0.672194 -0.671416 -0.865672 
 -0.670918 -0.671416 -0.865672 
 -0.682398 -0.671416 -0.847015 
 -0.681122 -0.671416 -0.854478 
 -0.679847 -0.671416 -0.858209 
 -0.678571 -0.671416 -0.861940 
 -0.676020 -0.671416 -0.865672 
 -0.673469 -0.671416 -0.865672 
 -0.672194 -0.671416 -0.865672 
 -0.670918 -0.671416 -0.865672 
 -0.669643 -0.671416 -0.869403 
 -0.682398 -0.670835 -0.854478 
 -0.681122 -0.670835 -0.854478 
 -0.679847 -0.670835 -0.858209 
 -0.678571 -0.670835 -0.861940 
 -0.676020 -0.670835 -0.869403 
 -0.673469 -0.670835 -0.873134 
 -0.672194 -0.670835 -0.873134 
 -0.670918 -0.670835 -0.873134 
 -0.669643 -0.670835 -0.873134 
 -0.682398 -0.670253 -0.858209 
 -0.681122 -0.670253 -0.858209 
 -0.679847 -0.670253 -0.861940 
 -0.678571 -0.670253 -0.865672 
 -0.676020 -0.670253 -0.869403 
 -0.673469 -0.670253 -0.876866 
 -0.672194 -0.670253 -0.876866 
 -0.670918 -0.670253 -0.876866 
 -0.669643 -0.670253 -0.880597 
 -0.681122 -0.670253 -0.858209 
 -0.679847 -0.670253 -0.861940 
 -0.678571 -0.670253 -0.865672 
 -0.677296 -0.670253 -0.869403 
 -0.674745 -0.670253 -0.873134 
 -0.672194 -0.670253 -0.876866 
 -0.670918 -0.670253 -0.876866 
 -0.669643 -0.670253 -0.880597 
 -0.668367 -0.670253 -0.880597 
 -0.681122 -0.669671 -0.865672 
 -0.679847 -0.669671 -0.865672 
 -0.678571 -0.669671 -0.869403 
 -0.677296 -0.669671 -0.869403 
 -0.674745 -0.669671 -0.876866 
 -0.672194 -0.669671 -0.880597 
 -0.670918 -0.669671 -0.880597 
 -0.669643 -0.669671 -0.884328 
 -0.668367 -0.669671 -0.884328 
 -0.681122 -0.669090 -0.869403 
 -0.679847 -0.669090 -0.869403 
 -0.678571 -0.669090 -0.869403 
 -0.677296 -0.669090 -0.873134 
 -0.674745 -0.669090 -0.876866 
 -0.672194 -0.669090 -0.880597 
 -0.670918 -0.669090 -0.884328 
 -0.669643 -0.669090 -0.884328 
 -0.668367 -0.669090 -0.884328 
 -0.679847 -0.669090 -0.869403 
 -0.678571 -0.669090 -0.869403 
 -0.677296 -0.669090 -0.873134 
 -0.676020 -0.669090 -0.876866 
 -0.673469 -0.669090 -0.880597 
 -0.670918 -0.669090 -0.884328 
 -0.669643 -0.669090 -0.884328 
 -0.668367 -0.669090 -0.884328 
 -0.667092 -0.669090 -0.884328 
 -0.679847 -0.668508 -0.873134 
 -0.678571 -0.668508 -0.873134 
 -0.677296 -0.668508 -0.876866 
 -0.676020 -0.668508 -0.880597 
 -0.673469 -0.668508 -0.884328 
 -0.670918 -0.668508 -0.884328 
 -0.669643 -0.668508 -0.884328 
 -0.668367 -0.668508 -0.884328 
 -0.667092 -0.668508 -0.884328 
 -0.679847 -0.667927 -0.873134 
 -0.678571 -0.667927 -0.876866 
 -0.677296 -0.667927 -0.880597 
 -0.676020 -0.667927 -0.880597 
 -0.673469 -0.667927 -0.884328 
 -0.670918 -0.667927 -0.884328 
 -0.669643 -0.667927 -0.884328 
 -0.668367 -0.667927 -0.884328 
 -0.667092 -0.667927 -0.884328 
 -0.678571 -0.667927 -0.876866 
 -0.677296 -0.667927 -0.880597 
 -0.676020 -0.667927 -0.880597 
 -0.674745 -0.667927 -0.884328 
 -0.672194 -0.667927 -0.884328 
 -0.669643 -0.667927 -0.884328 
 -0.668367 -0.667927 -0.884328 
 -0.667092 -0.667927 -0.884328 
 -0.665816 -0.667927 -0.884328 
 -0.678571 -0.667345 -0.880597 
 -0.677296 -0.667345 -0.880597 
 -0.676020 -0.667345 -0.884328 
 -0.674745 -0.667345 -0.884328 
 -0.672194 -0.667345 -0.884328 
 -0.669643 -0.667345 -0.884328 
 -0.668367 -0.667345 -0.884328 
 -0.667092 -0.667345 -0.884328 
 -0.665816 -0.667345 -0.884328 
 -0.678571 -0.666764 -0.884328 
 -0.677296 -0.666764 -0.884328 
 -0.676020 -0.666764 -0.884328 
 -0.674745 -0.666764 -0.884328 
 -0.672194 -0.666764 -0.884328 
 -0.669643 -0.666764 -0.884328 
 -0.668367 -0.666764 -0.884328 
 -0.667092 -0.666764 -0.884328 
 -0.665816 -0.666764 -0.884328 
 -0.677296 -0.666764 -0.884328 
 -0.676020 -0.666764 -0.884328 
 -0.674745 -0.666764 -0.884328 
 -0.673469 -0.666764 -0.884328 
 -0.670918 -0.666764 -0.884328 
 -0.668367 -0.666764 -0.884328 
 -0.667092 -0.666764 -0.884328 
 -0.665816 -0.666764 -0.884328 
 -0.664541 -0.666764 -0.884328 
 -0.677296 -0.666182 -0.884328 
 -0.676020 -0.666182 -0.884328 
 -0.674745 -0.666182 -0.884328 
 -0.673469 -0.666182 -0.884328 
 -0.670918 -0.666182 -0.884328 
 -0.668367 -0.666182 -0.884328 
 -0.667092 -0.666182 -0.884328 
 -0.665816 -0.666182 -0.884328 
 -0.664541 -0.666182 -0.884328 
 -0.677296 -0.665600 -0.884328 
 -0.676020 -0.665600 -0.884328 
 -0.674745 -0.665600 -0.884328 
 -0.673469 -0.665600 -0.884328 
 -0.670918 -0.665600 -0.884328 
 -0.668367 -0.665600 -0.884328 
 -0.667092 -0.665600 -0.884328 
 -0.665816 -0.665600 -0.884328 
 -0.664541 -0.665600 -0.884328 
 -0.676020 -0.665600 -0.884328 
 -0.674745 -0.665600 -0.884328 
 -0.673469 -0.665600 -0.884328 
 -0.672194 -0.665600 -0.884328 
 -0.669643 -0.665600 -0.884328 
 -0.667092 -0.665600 -0.884328 
 -0.665816 -0.665600 -0.884328 
 -0.664541 -0.665600 -0.884328 
 -0.663265 -0.665600 -0.884328 
 -0.676020 -0.665019 -0.884328 
 -0.674745 -0.665019 -0.884328 
 -0.673469 -0.665019 -0.884328 
 -0.672194 -0.665019 -0.884328 
 -0.669643 -0.665019 -0.884328 
 -0.667092 -0.665019 -0.884328 
 -0.665816 -0.665019 -0.884328 
 -0.664541 -0.665019 -0.884328 
 -0.663265 -0.665019 -0.884328 
 -0.676020 -0.664437 -0.888060 
 -0.674745 -0.664437 -0.888060 
 -0.673469 -0.664437 -0.888060 
 -0.672194 -0.664437 -0.888060 
 -0.669643 -0.664437 -0.884328 
 -0.667092 -0.664437 -0.884328 
 -0.665816 -0.664437 -0.884328 
 -0.664541 -0.664437 -0.884328 
 -0.663265 -0.664437 -0.884328 
 -0.674745 -0.664437 -0.888060 
 -0.673469 -0.664437 -0.888060 
 -0.672194 -0.664437 -0.888060 
 -0.670918 -0.664437 -0.884328 
 -0.668367 -0.664437 -0.884328 
 -0.665816 -0.664437 -0.884328 
 -0.664541 -0.664437 -0.884328 
 -0.663265 -0.664437 -0.884328 
 -0.661990 -0.664437 -0.888060 
 -0.674745 -0.663856 -0.891791 
 -0.673469 -0.663856 -0.888060 
 -0.672194 -0.663856 -0.888060 
 -0.670918 -0.663856 -0.888060 
 -0.668367 -0.663856 -0.888060 
 -0.665816 -0.663856 -0.884328 
 -0.664541 -0.663856 -0.884328 
 -0.663265 -0.663856 -0.888060 
 -0.661990 -0.663856 -0.891791 
 -0.674745 -0.663274 -0.891791 
 -0.673469 -0.663274 -0.891791 
 -0.672194 -0.663274 -0.891791 
 -0.670918 -0.663274 -0.888060 
 -0.668367 -0.663274 -0.888060 
 -0.665816 -0.663274 -0.888060 
 -0.664541 -0.663274 -0.888060 
 -0.663265 -0.663274 -0.891791 
 -0.661990 -0.663274 -0.895522 
 -0.673469 -0.663274 -0.891791 
 -0.672194 -0.663274 -0.891791 
 -0.670918 -0.663274 -0.888060 
 -0.669643 -0.663274 -0.888060 
 -0.667092 -0.663274 -0.888060 
 -0.664541 -0.663274 -0.888060 
 -0.663265 -0.663274 -0.891791 
 -0.661990 -0.663274 -0.895522 
 -0.660714 -0.663274 -0.899254 
 -0.673469 -0.662693 -0.891791 
 -0.672194 -0.662693 -0.891791 
 -0.670918 -0.662693 -0.891791 
 -0.669643 -0.662693 -0.891791 
 -0.667092 -0.662693 -0.891791 
 -0.664541 -0.662693 -0.891791 
 -0.663265 -0.662693 -0.895522 
 -0.661990 -0.662693 -0.899254 
 -0.660714 -0.662693 -0.899254 
 -0.673469 -0.662111 -0.895522 
 -0.672194 -0.662111 -0.895522 
 -0.670918 -0.662111 -0.891791 
 -0.669643 -0.662111 -0.891791 
 -0.667092 -0.662111 -0.895522 
 -0.664541 -0.662111 -0.895522 
 -0.663265 -0.662111 -0.895522 
 -0.661990 -0.662111 -0.899254 
 -0.660714 -0.662111 -0.902985 
 -0.672194 -0.662111 -0.895522 
 -0.670918 -0.662111 -0.891791 
 -0.669643 -0.662111 -0.891791 
 -0.668367 -0.662111 -0.891791 
 -0.665816 -0.662111 -0.895522 
 -0.663265 -0.662111 -0.895522 
 -0.661990 -0.662111 -0.899254 
 -0.660714 -0.662111 -0.902985 
 -0.659439 -0.662111 -0.902985 
 -0.672194 -0.661530 -0.895522 
 -0.670918 -0.661530 -0.895522 
 -0.669643 -0.661530 -0.895522 
 -0.668367 -0.661530 -0.895522 
 -0.665816 -0.661530 -0.895522 
 -0.663265 -0.661530 -0.899254 
 -0.661990 -0.661530 -0.902985 
 -0.660714 -0.661530 -0.902985 
 -0.659439 -0.661530 -0.902985 
 -0.672194 -0.660948 -0.899254 
 -0.670918 -0.660948 -0.899254 
 -0.669643 -0.660948 -0.899254 
 -0.668367 -0.660948 -0.899254 
 -0.665816 -0.660948 -0.899254 
 -0.663265 -0.660948 -0.899254 
 -0.661990 -0.660948 -0.902985 
 -0.660714 -0.660948 -0.902985 
 -0.659439 -0.660948 -0.902985 
 -0.670918 -0.660366 -0.902985 
 -0.669643 -0.660366 -0.899254 
 -0.668367 -0.660366 -0.899254 
 -0.667092 -0.660366 -0.899254 
 -0.664541 -0.660366 -0.902985 
 -0.661990 -0.660366 -0.902985 
 -0.660714 -0.660366 -0.902985 
 -0.659439 -0.660366 -0.902985 
 -0.658163 -0.660366 -0.906716 
 -0.670918 -0.659785 -0.902985 
 -0.669643 -0.659785 -0.902985 
 -0.668367 -0.659785 -0.902985 
 -0.667092 -0.659785 -0.902985 
 -0.664541 -0.659785 -0.902985 
 -0.661990 -0.659785 -0.902985 
 -0.660714 -0.659785 -0.902985 
 -0.659439 -0.659785 -0.902985 
 -0.658163 -0.659785 -0.906716 
 -0.670918 -0.659203 -0.902985 
 -0.669643 -0.659203 -0.902985 
 -0.668367 -0.659203 -0.902985 
 -0.667092 -0.659203 -0.902985 
 -0.664541 -0.659203 -0.902985 
 -0.661990 -0.659203 -0.902985 
 -0.660714 -0.659203 -0.902985 
 -0.659439 -0.659203 -0.902985 
 -0.658163 -0.659203 -0.906716 
 -0.669643 -0.659203 -0.902985 
 -0.668367 -0.659203 -0.902985 
 -0.667092 -0.659203 -0.902985 
 -0.665816 -0.659203 -0.902985 
 -0.663265 -0.659203 -0.902985 
 -0.660714 -0.659203 -0.902985 
 -0.659439 -0.659203 -0.902985 
 -0.658163 -0.659203 -0.906716 
 -0.656888 -0.659203 -0.906716 
 -0.669643 -0.658622 -0.902985 
 -0.668367 -0.658622 -0.902985 
 -0.667092 -0.658622 -0.902985 
 -0.665816 -0.658622 -0.902985 
 -0.663265 -0.658622 -0.902985 
 -0.660714 -0.658622 -0.902985 
 -0.659439 -0.658622 -0.902985 
 -0.658163 -0.658622 -0.902985 
 -0.656888 -0.658622 -0.906716 
 -0.669643 -0.658040 -0.884328 
 -0.668367 -0.658040 -0.891791 
 -0.667092 -0.658040 -0.899254 
 -0.665816 -0.658040 -0.902985 
 -0.663265 -0.658040 -0.902985 
 -0.660714 -0.658040 -0.902985 
 -0.659439 -0.658040 -0.902985 
 -0.658163 -0.658040 -0.902985 
 -0.656888 -0.658040 -0.902985 
 -0.668367 -0.658040 -0.891791 
 -0.667092 -0.658040 -0.899254 
 -0.665816 -0.658040 -0.902985 
 -0.664541 -0.658040 -0.902985 
 -0.661990 -0.658040 -0.902985 
 -0.659439 -0.658040 -0.902985 
 -0.658163 -0.658040 -0.902985 
 -0.656888 -0.658040 -0.902985 
 -0.655612 -0.658040 -0.906716 
 -0.668367 -0.657459 -0.876866 
 -0.667092 -0.657459 -0.880597 
 -0.665816 -0.657459 -0.884328 
 -0.664541 -0.657459 -0.891791 
 -0.661990 -0.657459 -0.899254 
 -0.659439 -0.657459 -0.902985 
 -0.658163 -0.657459 -0.902985 
 -0.656888 -0.657459 -0.902985 
 -0.655612 -0.657459 -0.906716 
 -0.668367 -0.656877 -0.865672 
 -0.667092 -0.656877 -0.865672 
 -0.665816 -0.656877 -0.865672 
 -0.664541 -0.656877 -0.865672 
 -0.661990 -0.656877 -0.850746 
 -0.659439 -0.656877 -0.858209 
 -0.658163 -0.656877 -0.865672 
 -0.656888 -0.656877 -0.869403 
 -0.655612 -0.656877 -0.873134 
 -0.667092 -0.656877 -0.865672 
 -0.665816 -0.656877 -0.865672 
 -0.664541 -0.656877 -0.865672 
 -0.663265 -0.656877 -0.850746 
 -0.660714 -0.656877 -0.854478 
 -0.658163 -0.656877 -0.865672 
 -0.656888 -0.656877 -0.869403 
 -0.655612 -0.656877 -0.873134 
 -0.654337 -0.656877 -0.884328 
 -0.667092 -0.656295 -0.865672 
 -0.665816 -0.656295 -0.865672 
 -0.664541 -0.656295 -0.865672 
 -0.663265 -0.656295 -0.865672 
 -0.660714 -0.656295 -0.828358 
 -0.658163 -0.656295 -0.828358 
 -0.656888 -0.656295 -0.828358 
 -0.655612 -0.656295 -0.835821 
 -0.654337 -0.656295 -0.850746 
 -0.667092 -0.655714 -0.861940 
 -0.665816 -0.655714 -0.865672 
 -0.664541 -0.655714 -0.865672 
 -0.663265 -0.655714 -0.865672 
 -0.660714 -0.655714 -0.865672 
 -0.658163 -0.655714 -0.839552 
 -0.656888 -0.655714 -0.809701 
 -0.655612 -0.655714 -0.809701 
 -0.654337 -0.655714 -0.809701 
 -0.665816 -0.655714 -0.865672 
 -0.664541 -0.655714 -0.865672 
 -0.663265 -0.655714 -0.865672 
 -0.661990 -0.655714 -0.865672 
 -0.659439 -0.655714 -0.865672 
 -0.656888 -0.655714 -0.809701 
 -0.655612 -0.655714 -0.809701 
 -0.654337 -0.655714 -0.809701 
 -0.653061 -0.655714 -0.824627 
 -0.665816 -0.655132 -0.858209 
 -0.664541 -0.655132 -0.865672 
 -0.663265 -0.655132 -0.865672 
 -0.661990 -0.655132 -0.865672 
 -0.659439 -0.655132 -0.865672 
 -0.656888 -0.655132 -0.865672 
 -0.655612 -0.655132 -0.839552 
 -0.654337 -0.655132 -0.813433 
 -0.653061 -0.655132 -0.817164 
 -0.665816 -0.654551 -0.809701 
 -0.664541 -0.654551 -0.824627 
 -0.663265 -0.654551 -0.843284 
 -0.661990 -0.654551 -0.865672 
 -0.659439 -0.654551 -0.865672 
 -0.656888 -0.654551 -0.865672 
 -0.655612 -0.654551 -0.869403 
 -0.654337 -0.654551 -0.869403 
 -0.653061 -0.654551 -0.869403 
 -0.664541 -0.654551 -0.824627 
 -0.663265 -0.654551 -0.843284 
 -0.661990 -0.654551 -0.865672 
 -0.660714 -0.654551 -0.865672 
 -0.658163 -0.654551 -0.865672 
 -0.655612 -0.654551 -0.869403 
 -0.654337 -0.654551 -0.869403 
 -0.653061 -0.654551 -0.869403 
 -0.651786 -0.654551 -0.847015 
 -0.664541 -0.653969 -0.791045 
 -0.663265 -0.653969 -0.813433 
 -0.661990 -0.653969 -0.828358 
 -0.660714 -0.653969 -0.850746 
 -0.658163 -0.653969 -0.865672 
 -0.655612 -0.653969 -0.869403 
 -0.654337 -0.653969 -0.873134 
 -0.653061 -0.653969 -0.869403 
 -0.651786 -0.653969 -0.873134 
 -0.664541 -0.653388 -0.757463 
 -0.663265 -0.653388 -0.772388 
 -0.661990 -0.653388 -0.787313 
 -0.660714 -0.653388 -0.802239 
 -0.658163 -0.653388 -0.843284 
 -0.655612 -0.653388 -0.869403 
 -0.654337 -0.653388 -0.880597 
 -0.653061 -0.653388 -0.880597 
 -0.651786 -0.653388 -0.884328 
 -0.663265 -0.653388 -0.772388 
 -0.661990 -0.653388 -0.787313 
 -0.660714 -0.653388 -0.802239 
 -0.659439 -0.653388 -0.820896 
 -0.656888 -0.653388 -0.869403 
 -0.654337 -0.653388 -0.880597 
 -0.653061 -0.653388 -0.880597 
 -0.651786 -0.653388 -0.884328 
 -0.650510 -0.653388 -0.884328 
 -0.663265 -0.652806 -0.772388 
 -0.661990 -0.652806 -0.783582 
 -0.660714 -0.652806 -0.798507 
 -0.659439 -0.652806 -0.817164 
 -0.656888 -0.652806 -0.854478 
 -0.654337 -0.652806 -0.884328 
 -0.653061 -0.652806 -0.884328 
 -0.651786 -0.652806 -0.884328 
 -0.650510 -0.652806 -0.888060 
 -0.663265 -0.652224 -0.828358 
 -0.661990 -0.652224 -0.832090 
 -0.660714 -0.652224 -0.839552 
 -0.659439 -0.652224 -0.850746 
 -0.656888 -0.652224 -0.876866 
 -0.654337 -0.652224 -0.895522 
 -0.653061 -0.652224 -0.899254 
 -0.651786 -0.652224 -0.891791 
 -0.650510 -0.652224 -0.895522 
 -0.661990 -0.652224 -0.832090 
 -0.660714 -0.652224 -0.839552 
 -0.659439 -0.652224 -0.850746 
 -0.658163 -0.652224 -0.861940 
 -0.655612 -0.652224 -0.888060 
 -0.653061 -0.652224 -0.899254 
 -0.651786 -0.652224 -0.891791 
 -0.650510 -0.652224 -0.895522 
 -0.649235 -0.652224 -0.902985 
 -0.661990 -0.651643 -0.884328 
 -0.660714 -0.651643 -0.880597 
 -0.659439 -0.651643 -0.876866 
 -0.658163 -0.651643 -0.884328 
 -0.655612 -0.651643 -0.899254 
 -0.653061 -0.651643 -0.902985 
 -0.651786 -0.651643 -0.902985 
 -0.650510 -0.651643 -0.906716 
 -0.649235 -0.651643 -0.917910 
 -0.661990 -0.651061 -0.876866 
 -0.660714 -0.651061 -0.884328 
 -0.659439 -0.651061 -0.895522 
 -0.658163 -0.651061 -0.902985 
 -0.655612 -0.651061 -0.910448 
 -0.653061 -0.651061 -0.910448 
 -0.651786 -0.651061 -0.914179 
 -0.650510 -0.651061 -0.917910 
 -0.649235 -0.651061 -0.921642 
 -0.660714 -0.651061 -0.884328 
 -0.659439 -0.651061 -0.895522 
 -0.658163 -0.651061 -0.902985 
 -0.656888 -0.651061 -0.906716 
 -0.654337 -0.651061 -0.910448 
 -0.651786 -0.651061 -0.914179 
 -0.650510 -0.651061 -0.917910 
 -0.649235 -0.651061 -0.921642 
 -0.647959 -0.651061 -0.921642 
 -0.660714 -0.650480 -0.880597 
 -0.659439 -0.650480 -0.895522 
 -0.658163 -0.650480 -0.906716 
 -0.656888 -0.650480 -0.910448 
 -0.654337 -0.650480 -0.917910 
 -0.651786 -0.650480 -0.921642 
 -0.650510 -0.650480 -0.921642 
 -0.649235 -0.650480 -0.921642 
 -0.647959 -0.650480 -0.921642 
 -0.660714 -0.649898 -0.876866 
 -0.659439 -0.649898 -0.899254 
 -0.658163 -0.649898 -0.914179 
 -0.656888 -0.649898 -0.917910 
 -0.654337 -0.649898 -0.921642 
 -0.651786 -0.649898 -0.921642 
 -0.650510 -0.649898 -0.921642 
 -0.649235 -0.649898 -0.921642 
 -0.647959 -0.649898 -0.921642 
 -0.660714 -0.649317 -0.906716 
 -0.659439 -0.649317 -0.917910 
 -0.658163 -0.649317 -0.921642 
 -0.656888 -0.649317 -0.921642 
 -0.654337 -0.649317 -0.921642 
 -0.651786 -0.649317 -0.921642 
 -0.650510 -0.649317 -0.921642 
 -0.649235 -0.649317 -0.921642 
 -0.647959 -0.649317 -0.921642 
 -0.659439 -0.649317 -0.917910 
 -0.658163 -0.649317 -0.921642 
 -0.656888 -0.649317 -0.921642 
 -0.655612 -0.649317 -0.921642 
 -0.653061 -0.649317 -0.921642 
 -0.650510 -0.649317 -0.921642 
 -0.649235 -0.649317 -0.921642 
 -0.647959 -0.649317 -0.921642 
 -0.646684 -0.649317 -0.929104 
 -0.659439 -0.648735 -0.921642 
 -0.658163 -0.648735 -0.921642 
 -0.656888 -0.648735 -0.921642 
 -0.655612 -0.648735 -0.921642 
 -0.653061 -0.648735 -0.921642 
 -0.650510 -0.648735 -0.921642 
 -0.649235 -0.648735 -0.932836 
 -0.647959 -0.648735 -0.936567 
 -0.646684 -0.648735 -0.940299 
 -0.659439 -0.648154 -0.921642 
 -0.658163 -0.648154 -0.921642 
 -0.656888 -0.648154 -0.921642 
 -0.655612 -0.648154 -0.921642 
 -0.653061 -0.648154 -0.921642 
 -0.650510 -0.648154 -0.940299 
 -0.649235 -0.648154 -0.936567 
 -0.647959 -0.648154 -0.932836 
 -0.646684 -0.648154 -0.940299 
 -0.658163 -0.648154 -0.921642 
 -0.656888 -0.648154 -0.921642 
 -0.655612 -0.648154 -0.921642 
 -0.654337 -0.648154 -0.921642 
 -0.651786 -0.648154 -0.925373 
 -0.649235 -0.648154 -0.936567 
 -0.647959 -0.648154 -0.932836 
 -0.646684 -0.648154 -0.940299 
 -0.645408 -0.648154 -0.940299 
 -0.658163 -0.647572 -0.921642 
 -0.656888 -0.647572 -0.921642 
 -0.655612 -0.647572 -0.921642 
 -0.654337 -0.647572 -0.921642 
 -0.651786 -0.647572 -0.940299 
 -0.649235 -0.647572 -0.929104 
 -0.647959 -0.647572 -0.921642 
 -0.646684 -0.647572 -0.940299 
 -0.645408 -0.647572 -0.940299 
 -0.658163 -0.646990 -0.925373 
 -0.656888 -0.646990 -0.925373 
 -0.655612 -0.646990 -0.929104 
 -0.654337 -0.646990 -0.936567 
 -0.651786 -0.646990 -0.940299 
 -0.649235 -0.646990 -0.914179 
 -0.647959 -0.646990 -0.914179 
 -0.646684 -0.646990 -0.936567 
 -0.645408 -0.646990 -0.940299 
 -0.656888 -0.646990 -0.925373 
 -0.655612 -0.646990 -0.929104 
 -0.654337 -0.646990 -0.936567 
 -0.653061 -0.646990 -0.940299 
 -0.650510 -0.646990 -0.925373 
 -0.647959 -0.646990 -0.914179 
 -0.646684 -0.646990 -0.936567 
 -0.645408 -0.646990 -0.940299 
 -0.644133 -0.646990 -0.940299 
 -0.656888 -0.646409 -0.932836 
 -0.655612 -0.646409 -0.940299 
 -0.654337 -0.646409 -0.940299 
 -0.653061 -0.646409 -0.940299 
 -0.650510 -0.646409 -0.929104 
 -0.647959 -0.646409 -0.917910 
 -0.646684 -0.646409 -0.936567 
 -0.645408 -0.646409 -0.940299 
 -0.644133 -0.646409 -0.936567 
 -0.656888 -0.645827 -0.940299 
 -0.655612 -0.645827 -0.940299 
 -0.654337 -0.645827 -0.940299 
 -0.653061 -0.645827 -0.940299 
 -0.650510 -0.645827 -0.932836 
 -0.647959 -0.645827 -0.936567 
 -0.646684 -0.645827 -0.940299 
 -0.645408 -0.645827 -0.936567 
 -0.644133 -0.645827 -0.932836 
 -0.655612 -0.645827 -0.940299 
 -0.654337 -0.645827 -0.940299 
 -0.653061 -0.645827 -0.940299 
 -0.651786 -0.645827 -0.940299 
 -0.649235 -0.645827 -0.925373 
 -0.646684 -0.645827 -0.940299 
 -0.645408 -0.645827 -0.936567 
 -0.644133 -0.645827 -0.932836 
 -0.642857 -0.645827 -0.932836 
 -0.655612 -0.645246 -0.940299 
 -0.654337 -0.645246 -0.940299 
 -0.653061 -0.645246 -0.940299 
 -0.651786 -0.645246 -0.940299 
 -0.649235 -0.645246 -0.936567 
 -0.646684 -0.645246 -0.940299 
 -0.645408 -0.645246 -0.936567 
 -0.644133 -0.645246 -0.932836 
 -0.642857 -0.645246 -0.932836 
 -0.655612 -0.644664 -0.940299 
 -0.654337 -0.644664 -0.940299 
 -0.653061 -0.644664 -0.940299 
 -0.651786 -0.644664 -0.940299 
 -0.649235 -0.644664 -0.940299 
 -0.646684 -0.644664 -0.940299 
 -0.645408 -0.644664 -0.936567 
 -0.644133 -0.644664 -0.936567 
 -0.642857 -0.644664 -0.932836 
 -0.654337 -0.644664 -0.940299 
 -0.653061 -0.644664 -0.940299 
 -0.651786 -0.644664 -0.940299 
 -0.650510 -0.644664 -0.940299 
 -0.647959 -0.644664 -0.940299 
 -0.645408 -0.644664 -0.936567 
 -0.644133 -0.644664 -0.936567 
 -0.642857 -0.644664 -0.932836 
 -0.641582 -0.644664 -0.932836 
 -0.654337 -0.644083 -0.940299 
 -0.653061 -0.644083 -0.940299 
 -0.651786 -0.644083 -0.940299 
 -0.650510 -0.644083 -0.940299 
 -0.647959 -0.644083 -0.940299 
 -0.645408 -0.644083 -0.936567 
 -0.644133 -0.644083 -0.936567 
 -0.642857 -0.644083 -0.932836 
 -0.641582 -0.644083 -0.932836 
 -0.654337 -0.643501 -0.940299 
 -0.653061 -0.643501 -0.940299 
 -0.651786 -0.643501 -0.940299 
 -0.650510 -0.643501 -0.940299 
 -0.647959 -0.643501 -0.940299 
 -0.645408 -0.643501 -0.940299 
 -0.644133 -0.643501 -0.936567 
 -0.642857 -0.643501 -0.936567 
 -0.641582 -0.643501 -0.932836 
 -0.653061 -0.643501 -0.940299 
 -0.651786 -0.643501 -0.940299 
 -0.650510 -0.643501 -0.940299 
 -0.649235 -0.643501 -0.940299 
 -0.646684 -0.643501 -0.940299 
 -0.644133 -0.643501 -0.936567 
 -0.642857 -0.643501 -0.936567 
 -0.641582 -0.643501 -0.932836 
 -0.640306 -0.643501 -0.932836 
 -0.653061 -0.642919 -0.940299 
 -0.651786 -0.642919 -0.940299 
 -0.650510 -0.642919 -0.940299 
 -0.649235 -0.642919 -0.940299 
 -0.646684 -0.642919 -0.940299 
 -0.644133 -0.642919 -0.936567 
 -0.642857 -0.642919 -0.936567 
 -0.641582 -0.642919 -0.936567 
 -0.640306 -0.642919 -0.936567 
 -0.653061 -0.642338 -0.940299 
 -0.651786 -0.642338 -0.940299 
 -0.650510 -0.642338 -0.940299 
 -0.649235 -0.642338 -0.940299 
 -0.646684 -0.642338 -0.940299 
 -0.644133 -0.642338 -0.940299 
 -0.642857 -0.642338 -0.936567 
 -0.641582 -0.642338 -0.936567 
 -0.640306 -0.642338 -0.936567 
 -0.651786 -0.642338 -0.940299 
 -0.650510 -0.642338 -0.940299 
 -0.649235 -0.642338 -0.940299 
 -0.647959 -0.642338 -0.940299 
 -0.645408 -0.642338 -0.940299 
 -0.642857 -0.642338 -0.936567 
 -0.641582 -0.642338 -0.936567 
 -0.640306 -0.642338 -0.936567 
 -0.639031 -0.642338 -0.936567 
 -0.651786 -0.641756 -0.940299 
 -0.650510 -0.641756 -0.940299 
 -0.649235 -0.641756 -0.940299 
 -0.647959 -0.641756 -0.940299 
 -0.645408 -0.641756 -0.940299 
 -0.642857 -0.641756 -0.940299 
 -0.641582 -0.641756 -0.940299 
 -0.640306 -0.641756 -0.936567 
 -0.639031 -0.641756 -0.936567 
 -0.651786 -0.641175 -0.940299 
 -0.650510 -0.641175 -0.940299 
 -0.649235 -0.641175 -0.940299 
 -0.647959 -0.641175 -0.940299 
 -0.645408 -0.641175 -0.940299 
 -0.642857 -0.641175 -0.940299 
 -0.641582 -0.641175 -0.940299 
 -0.640306 -0.641175 -0.940299 
 -0.639031 -0.641175 -0.940299 
 -0.650510 -0.641175 -0.940299 
 -0.649235 -0.641175 -0.940299 
 -0.647959 -0.641175 -0.940299 
 -0.646684 -0.641175 -0.940299 
 -0.644133 -0.641175 -0.940299 
 -0.641582 -0.641175 -0.940299 
 -0.640306 -0.641175 -0.940299 
 -0.639031 -0.641175 -0.940299 
 -0.637755 -0.641175 -0.940299 
 -0.650510 -0.640593 -0.940299 
 -0.649235 -0.640593 -0.940299 
 -0.647959 -0.640593 -0.940299 
 -0.646684 -0.640593 -0.940299 
 -0.644133 -0.640593 -0.940299 
 -0.641582 -0.640593 -0.940299 
 -0.640306 -0.640593 -0.940299 
 -0.639031 -0.640593 -0.940299 
 -0.637755 -0.640593 -0.940299 
 -0.650510 -0.640012 -0.936567 
 -0.649235 -0.640012 -0.940299 
 -0.647959 -0.640012 -0.940299 
 -0.646684 -0.640012 -0.940299 
 -0.644133 -0.640012 -0.940299 
 -0.641582 -0.640012 -0.940299 
 -0.640306 -0.640012 -0.940299 
 -0.639031 -0.640012 -0.940299 
 -0.637755 -0.640012 -0.940299 
 -0.650510 -0.639430 -0.940299 
 -0.649235 -0.639430 -0.940299 
 -0.647959 -0.639430 -0.940299 
 -0.646684 -0.639430 -0.940299 
 -0.644133 -0.639430 -0.940299 
 -0.641582 -0.639430 -0.940299 
 -0.640306 -0.639430 -0.940299 
 -0.639031 -0.639430 -0.940299 
 -0.637755 -0.639430 -0.940299 
 -0.649235 -0.639430 -0.940299 
 -0.647959 -0.639430 -0.940299 
 -0.646684 -0.639430 -0.940299 
 -0.645408 -0.639430 -0.940299 
 -0.642857 -0.639430 -0.940299 
 -0.640306 -0.639430 -0.940299 
 -0.639031 -0.639430 -0.940299 
 -0.637755 -0.639430 -0.940299 
 -0.636480 -0.639430 -0.940299 
 -0.649235 -0.638849 -0.940299 
 -0.647959 -0.638849 -0.940299 
 -0.646684 -0.638849 -0.940299 
 -0.645408 -0.638849 -0.940299 
 -0.642857 -0.638849 -0.940299 
 -0.640306 -0.638849 -0.940299 
 -0.639031 -0.638849 -0.940299 
 -0.637755 -0.638849 -0.940299 
 -0.636480 -0.638849 -0.940299 
 -0.649235 -0.638267 -0.940299 
 -0.647959 -0.638267 -0.940299 
 -0.646684 -0.638267 -0.940299 
 -0.645408 -0.638267 -0.940299 
 -0.642857 -0.638267 -0.940299 
 -0.640306 -0.638267 -0.940299 
 -0.639031 -0.638267 -0.940299 
 -0.637755 -0.638267 -0.940299 
 -0.636480 -0.638267 -0.940299 
 -0.647959 -0.638267 -0.940299 
 -0.646684 -0.638267 -0.940299 
 -0.645408 -0.638267 -0.940299 
 -0.644133 -0.638267 -0.940299 
 -0.641582 -0.638267 -0.940299 
 -0.639031 -0.638267 -0.940299 
 -0.637755 -0.638267 -0.940299 
 -0.636480 -0.638267 -0.940299 
 -0.635204 -0.638267 -0.936567 
 -0.647959 -0.637685 -0.940299 
 -0.646684 -0.637685 -0.940299 
 -0.645408 -0.637685 -0.940299 
 -0.644133 -0.637685 -0.940299 
 -0.641582 -0.637685 -0.940299 
 -0.639031 -0.637685 -0.940299 
 -0.637755 -0.637685 -0.940299 
 -0.636480 -0.637685 -0.936567 
 -0.635204 -0.637685 -0.936567 
 -0.647959 -0.637104 -0.940299 
 -0.646684 -0.637104 -0.940299 
 -0.645408 -0.637104 -0.940299 
 -0.644133 -0.637104 -0.940299 
 -0.641582 -0.637104 -0.940299 
 -0.639031 -0.637104 -0.940299 
 -0.637755 -0.637104 -0.940299 
 -0.636480 -0.637104 -0.940299 
 -0.635204 -0.637104 -0.936567 
 -0.646684 -0.637104 -0.940299 
 -0.645408 -0.637104 -0.940299 
 -0.644133 -0.637104 -0.940299 
 -0.642857 -0.637104 -0.940299 
 -0.640306 -0.637104 -0.940299 
 -0.637755 -0.637104 -0.940299 
 -0.636480 -0.637104 -0.940299 
 -0.635204 -0.637104 -0.936567 
 -0.633929 -0.637104 -0.936567 
 -0.646684 -0.636522 -0.940299 
 -0.645408 -0.636522 -0.940299 
 -0.644133 -0.636522 -0.940299 
 -0.642857 -0.636522 -0.940299 
 -0.640306 -0.636522 -0.940299 
 -0.637755 -0.636522 -0.940299 
 -0.636480 -0.636522 -0.940299 
 -0.635204 -0.636522 -0.940299 
 -0.633929 -0.636522 -0.936567 
 -0.646684 -0.635941 -0.940299 
 -0.645408 -0.635941 -0.940299 
 -0.644133 -0.635941 -0.940299 
 -0.642857 -0.635941 -0.940299 
 -0.640306 -0.635941 -0.940299 
 -0.637755 -0.635941 -0.940299 
 -0.636480 -0.635941 -0.940299 
 -0.635204 -0.635941 -0.940299 
 -0.633929 -0.635941 -0.940299 
 -0.645408 -0.635941 -0.940299 
 -0.644133 -0.635941 -0.940299 
 -0.642857 -0.635941 -0.940299 
 -0.641582 -0.635941 -0.940299 
 -0.639031 -0.635941 -0.940299 
 -0.636480 -0.635941 -0.940299 
 -0.635204 -0.635941 -0.940299 
 -0.633929 -0.635941 -0.940299 
 -0.632653 -0.635941 -0.936567 
 -0.645408 -0.635359 -0.944030 
 -0.644133 -0.635359 -0.944030 
 -0.642857 -0.635359 -0.940299 
 -0.641582 -0.635359 -0.940299 
 -0.639031 -0.635359 -0.940299 
 -0.636480 -0.635359 -0.940299 
 -0.635204 -0.635359 -0.940299 
 -0.633929 -0.635359 -0.940299 
 -0.632653 -0.635359 -0.940299 
 -0.645408 -0.634778 -0.944030 
 -0.644133 -0.634778 -0.944030 
 -0.642857 -0.634778 -0.944030 
 -0.641582 -0.634778 -0.944030 
 -0.639031 -0.634778 -0.940299 
 -0.636480 -0.634778 -0.940299 
 -0.635204 -0.634778 -0.940299 
 -0.633929 -0.634778 -0.940299 
 -0.632653 -0.634778 -0.940299 
 -0.644133 -0.634778 -0.944030 
 -0.642857 -0.634778 -0.944030 
 -0.641582 -0.634778 -0.944030 
 -0.640306 -0.634778 -0.944030 
 -0.637755 -0.634778 -0.940299 
 -0.635204 -0.634778 -0.940299 
 -0.633929 -0.634778 -0.940299 
 -0.632653 -0.634778 -0.940299 
 -0.631378 -0.634778 -0.940299 
 -0.644133 -0.634196 -0.944030 
 -0.642857 -0.634196 -0.944030 
 -0.641582 -0.634196 -0.944030 
 -0.640306 -0.634196 -0.940299 
 -0.637755 -0.634196 -0.940299 
 -0.635204 -0.634196 -0.940299 
 -0.633929 -0.634196 -0.940299 
 -0.632653 -0.634196 -0.940299 
 -0.631378 -0.634196 -0.940299 
 -0.644133 -0.633614 -0.944030 
 -0.642857 -0.633614 -0.944030 
 -0.641582 -0.633614 -0.944030 
 -0.640306 -0.633614 -0.940299 
 -0.637755 -0.633614 -0.940299 
 -0.635204 -0.633614 -0.940299 
 -0.633929 -0.633614 -0.940299 
 -0.632653 -0.633614 -0.940299 
 -0.631378 -0.633614 -0.940299 
 -0.642857 -0.633614 -0.944030 
 -0.641582 -0.633614 -0.944030 
 -0.640306 -0.633614 -0.940299 
 -0.639031 -0.633614 -0.940299 
 -0.636480 -0.633614 -0.940299 
 -0.633929 -0.633614 -0.940299 
 -0.632653 -0.633614 -0.940299 
 -0.631378 -0.633614 -0.940299 
 -0.630102 -0.633614 -0.940299 
 -0.642857 -0.633033 -0.944030 
 -0.641582 -0.633033 -0.944030 
 -0.640306 -0.633033 -0.944030 
 -0.639031 -0.633033 -0.940299 
 -0.636480 -0.633033 -0.940299 
 -0.633929 -0.633033 -0.940299 
 -0.632653 -0.633033 -0.940299 
 -0.631378 -0.633033 -0.940299 
 -0.630102 -0.633033 -0.940299 
 -0.642857 -0.632451 -0.944030 
 -0.641582 -0.632451 -0.944030 
 -0.640306 -0.632451 -0.944030 
 -0.639031 -0.632451 -0.940299 
 -0.636480 -0.632451 -0.940299 
 -0.633929 -0.632451 -0.940299 
 -0.632653 -0.632451 -0.940299 
 -0.631378 -0.632451 -0.940299 
 -0.630102 -0.632451 -0.940299 
 -0.641582 -0.632451 -0.944030 
 -0.640306 -0.632451 -0.944030 
 -0.639031 -0.632451 -0.940299 
 -0.637755 -0.632451 -0.940299 
 -0.635204 -0.632451 -0.940299 
 -0.632653 -0.632451 -0.940299 
 -0.631378 -0.632451 -0.940299 
 -0.630102 -0.632451 -0.940299 
 -0.628827 -0.632451 -0.940299 
 -0.641582 -0.631870 -0.944030 
 -0.640306 -0.631870 -0.944030 
 -0.639031 -0.631870 -0.940299 
 -0.637755 -0.631870 -0.940299 
 -0.635204 -0.631870 -0.940299 
 -0.632653 -0.631870 -0.940299 
 -0.631378 -0.631870 -0.940299 
 -0.630102 -0.631870 -0.940299 
 -0.628827 -0.631870 -0.936567 
 -0.641582 -0.631288 -0.944030 
 -0.640306 -0.631288 -0.944030 
 -0.639031 -0.631288 -0.940299 
 -0.637755 -0.631288 -0.940299 
 -0.635204 -0.631288 -0.940299 
 -0.632653 -0.631288 -0.940299 
 -0.631378 -0.631288 -0.940299 
 -0.630102 -0.631288 -0.940299 
 -0.628827 -0.631288 -0.936567 
 -0.641582 -0.630707 -0.944030 
 -0.640306 -0.630707 -0.944030 
 -0.639031 -0.630707 -0.940299 
 -0.637755 -0.630707 -0.940299 
 -0.635204 -0.630707 -0.940299 
 -0.632653 -0.630707 -0.940299 
 -0.631378 -0.630707 -0.940299 
 -0.630102 -0.630707 -0.940299 
 -0.628827 -0.630707 -0.936567 
 -0.640306 -0.630707 -0.944030 
 -0.639031 -0.630707 -0.940299 
 -0.637755 -0.630707 -0.940299 
 -0.636480 -0.630707 -0.940299 
 -0.633929 -0.630707 -0.940299 
 -0.631378 -0.630707 -0.940299 
 -0.630102 -0.630707 -0.940299 
 -0.628827 -0.630707 -0.936567 
 -0.627551 -0.630707 -0.936567 
 -0.640306 -0.630125 -0.944030 
 -0.639031 -0.630125 -0.940299 
 -0.637755 -0.630125 -0.940299 
 -0.636480 -0.630125 -0.940299 
 -0.633929 -0.630125 -0.940299 
 -0.631378 -0.630125 -0.940299 
 -0.630102 -0.630125 -0.940299 
 -0.628827 -0.630125 -0.936567 
 -0.627551 -0.630125 -0.936567 
 -0.640306 -0.629543 -0.944030 
 -0.639031 -0.629543 -0.940299 
 -0.637755 -0.629543 -0.940299 
 -0.636480 -0.629543 -0.940299 
 -0.633929 -0.629543 -0.940299 
 -0.631378 -0.629543 -0.940299 
 -0.630102 -0.629543 -0.936567 
 -0.628827 -0.629543 -0.936567 
 -0.627551 -0.629543 -0.936567 
 -0.639031 -0.629543 -0.940299 
 -0.637755 -0.629543 -0.940299 
 -0.636480 -0.629543 -0.940299 
 -0.635204 -0.629543 -0.940299 
 -0.632653 -0.629543 -0.940299 
 -0.630102 -0.629543 -0.936567 
 -0.628827 -0.629543 -0.936567 
 -0.627551 -0.629543 -0.936567 
 -0.626276 -0.629543 -0.936567 
 -0.639031 -0.628962 -0.940299 
 -0.637755 -0.628962 -0.940299 
 -0.636480 -0.628962 -0.940299 
 -0.635204 -0.628962 -0.940299 
 -0.632653 -0.628962 -0.940299 
 -0.630102 -0.628962 -0.936567 
 -0.628827 -0.628962 -0.936567 
 -0.627551 -0.628962 -0.936567 
 -0.626276 -0.628962 -0.936567 
 -0.639031 -0.628380 -0.940299 
 -0.637755 -0.628380 -0.940299 
 -0.636480 -0.628380 -0.940299 
 -0.635204 -0.628380 -0.940299 
 -0.632653 -0.628380 -0.940299 
 -0.630102 -0.628380 -0.936567 
 -0.628827 -0.628380 -0.936567 
 -0.627551 -0.628380 -0.936567 
 -0.626276 -0.628380 -0.936567 
 -0.637755 -0.628380 -0.940299 
 -0.636480 -0.628380 -0.940299 
 -0.635204 -0.628380 -0.940299 
 -0.633929 -0.628380 -0.940299 
 -0.631378 -0.628380 -0.940299 
 -0.628827 -0.628380 -0.936567 
 -0.627551 -0.628380 -0.936567 
 -0.626276 -0.628380 -0.936567 
 -0.625000 -0.628380 -0.936567 
 -0.637755 -0.627799 -0.940299 
 -0.636480 -0.627799 -0.940299 
 -0.635204 -0.627799 -0.940299 
 -0.633929 -0.627799 -0.940299 
 -0.631378 -0.627799 -0.940299 
 -0.628827 -0.627799 -0.936567 
 -0.627551 -0.627799 -0.936567 
 -0.626276 -0.627799 -0.936567 
 -0.625000 -0.627799 -0.936567 
 -0.637755 -0.627217 -0.940299 
 -0.636480 -0.627217 -0.940299 
 -0.635204 -0.627217 -0.940299 
 -0.633929 -0.627217 -0.940299 
 -0.631378 -0.627217 -0.940299 
 -0.628827 -0.627217 -0.936567 
 -0.627551 -0.627217 -0.936567 
 -0.626276 -0.627217 -0.936567 
 -0.625000 -0.627217 -0.936567 
 -0.636480 -0.627217 -0.940299 
 -0.635204 -0.627217 -0.940299 
 -0.633929 -0.627217 -0.940299 
 -0.632653 -0.627217 -0.940299 
 -0.630102 -0.627217 -0.940299 
 -0.627551 -0.627217 -0.936567 
 -0.626276 -0.627217 -0.936567 
 -0.625000 -0.627217 -0.936567 
 -0.623724 -0.627217 -0.936567 
 -0.636480 -0.626636 -0.940299 
 -0.635204 -0.626636 -0.940299 
 -0.633929 -0.626636 -0.940299 
 -0.632653 -0.626636 -0.940299 
 -0.630102 -0.626636 -0.940299 
 -0.627551 -0.626636 -0.936567 
 -0.626276 -0.626636 -0.936567 
 -0.625000 -0.626636 -0.936567 
 -0.623724 -0.626636 -0.936567 
 -0.636480 -0.626054 -0.940299 
 -0.635204 -0.626054 -0.940299 
 -0.633929 -0.626054 -0.940299 
 -0.632653 -0.626054 -0.940299 
 -0.630102 -0.626054 -0.936567 
 -0.627551 -0.626054 -0.936567 
 -0.626276 -0.626054 -0.936567 
 -0.625000 -0.626054 -0.936567 
 -0.623724 -0.626054 -0.936567 
 -0.635204 -0.626054 -0.940299 
 -0.633929 -0.626054 -0.940299 
 -0.632653 -0.626054 -0.940299 
 -0.631378 -0.626054 -0.940299 
 -0.628827 -0.626054 -0.936567 
 -0.626276 -0.626054 -0.936567 
 -0.625000 -0.626054 -0.936567 
 -0.623724 -0.626054 -0.936567 
 -0.622449 -0.626054 -0.936567 
 -0.635204 -0.625473 -0.940299 
 -0.633929 -0.625473 -0.940299 
 -0.632653 -0.625473 -0.940299 
 -0.631378 -0.625473 -0.940299 
 -0.628827 -0.625473 -0.936567 
 -0.626276 -0.625473 -0.936567 
 -0.625000 -0.625473 -0.936567 
 -0.623724 -0.625473 -0.936567 
 -0.622449 -0.625473 -0.936567 
 -0.635204 -0.624891 -0.940299 
 -0.633929 -0.624891 -0.940299 
 -0.632653 -0.624891 -0.940299 
 -0.631378 -0.624891 -0.936567 
 -0.628827 -0.624891 -0.936567 
 -0.626276 -0.624891 -0.936567 
 -0.625000 -0.624891 -0.936567 
 -0.623724 -0.624891 -0.936567 
 -0.622449 -0.624891 -0.936567 
 -0.633929 -0.624891 -0.940299 
 -0.632653 -0.624891 -0.940299 
 -0.631378 -0.624891 -0.936567 
 -0.630102 -0.624891 -0.936567 
 -0.627551 -0.624891 -0.936567 
 -0.625000 -0.624891 -0.936567 
 -0.623724 -0.624891 -0.936567 
 -0.622449 -0.624891 -0.936567 
 -0.621173 -0.624891 -0.936567 
 -0.633929 -0.624309 -0.940299 
 -0.632653 -0.624309 -0.936567 
 -0.631378 -0.624309 -0.936567 
 -0.630102 -0.624309 -0.936567 
 -0.627551 -0.624309 -0.936567 
 -0.625000 -0.624309 -0.936567 
 -0.623724 -0.624309 -0.936567 
 -0.622449 -0.624309 -0.936567 
 -0.621173 -0.624309 -0.936567 
 -0.633929 -0.623728 -0.940299 
 -0.632653 -0.623728 -0.936567 
 -0.631378 -0.623728 -0.936567 
 -0.630102 -0.623728 -0.936567 
 -0.627551 -0.623728 -0.936567 
 -0.625000 -0.623728 -0.936567 
 -0.623724 -0.623728 -0.936567 
 -0.622449 -0.623728 -0.936567 
 -0.621173 -0.623728 -0.936567 
 -0.632653 -0.623728 -0.936567 
 -0.631378 -0.623728 -0.936567 
 -0.630102 -0.623728 -0.936567 
 -0.628827 -0.623728 -0.936567 
 -0.626276 -0.623728 -0.936567 
 -0.623724 -0.623728 -0.936567 
 -0.622449 -0.623728 -0.936567 
 -0.621173 -0.623728 -0.936567 
 -0.619898 -0.623728 -0.936567 
 -0.632653 -0.623146 -0.936567 
 -0.631378 -0.623146 -0.936567 
 -0.630102 -0.623146 -0.936567 
 -0.628827 -0.623146 -0.936567 
 -0.626276 -0.623146 -0.936567 
 -0.623724 -0.623146 -0.936567 
 -0.622449 -0.623146 -0.936567 
 -0.621173 -0.623146 -0.936567 
 -0.619898 -0.623146 -0.936567 
 -0.632653 -0.622565 -0.936567 
 -0.631378 -0.622565 -0.936567 
 -0.630102 -0.622565 -0.936567 
 -0.628827 -0.622565 -0.936567 
 -0.626276 -0.622565 -0.936567 
 -0.623724 -0.622565 -0.936567 
 -0.622449 -0.622565 -0.936567 
 -0.621173 -0.622565 -0.936567 
 -0.619898 -0.622565 -0.936567 
 -0.632653 -0.621983 -0.936567 
 -0.631378 -0.621983 -0.936567 
 -0.630102 -0.621983 -0.936567 
 -0.628827 -0.621983 -0.936567 
 -0.626276 -0.621983 -0.936567 
 -0.623724 -0.621983 -0.936567 
 -0.622449 -0.621983 -0.936567 
 -0.621173 -0.621983 -0.936567 
 -0.619898 -0.621983 -0.936567 
 -0.631378 -0.621983 -0.936567 
 -0.630102 -0.621983 -0.936567 
 -0.628827 -0.621983 -0.936567 
 -0.627551 -0.621983 -0.936567 
 -0.625000 -0.621983 -0.936567 
 -0.622449 -0.621983 -0.936567 
 -0.621173 -0.621983 -0.936567 
 -0.619898 -0.621983 -0.936567 
 -0.618622 -0.621983 -0.932836 
 -0.631378 -0.621402 -0.936567 
 -0.630102 -0.621402 -0.936567 
 -0.628827 -0.621402 -0.936567 
 -0.627551 -0.621402 -0.936567 
 -0.625000 -0.621402 -0.936567 
 -0.622449 -0.621402 -0.936567 
 -0.621173 -0.621402 -0.936567 
 -0.619898 -0.621402 -0.936567 
 -0.618622 -0.621402 -0.932836 
 -0.631378 -0.620820 -0.936567 
 -0.630102 -0.620820 -0.936567 
 -0.628827 -0.620820 -0.936567 
 -0.627551 -0.620820 -0.936567 
 -0.625000 -0.620820 -0.936567 
 -0.622449 -0.620820 -0.936567 
 -0.621173 -0.620820 -0.936567 
 -0.619898 -0.620820 -0.932836 
 -0.618622 -0.620820 -0.932836 
 -0.630102 -0.620820 -0.936567 
 -0.628827 -0.620820 -0.936567 
 -0.627551 -0.620820 -0.936567 
 -0.626276 -0.620820 -0.936567 
 -0.623724 -0.620820 -0.936567 
 -0.621173 -0.620820 -0.936567 
 -0.619898 -0.620820 -0.932836 
 -0.618622 -0.620820 -0.932836 
 -0.617347 -0.620820 -0.932836 
 -0.630102 -0.620238 -0.936567 
 -0.628827 -0.620238 -0.936567 
 -0.627551 -0.620238 -0.936567 
 -0.626276 -0.620238 -0.936567 
 -0.623724 -0.620238 -0.932836 
 -0.621173 -0.620238 -0.932836 
 -0.619898 -0.620238 -0.932836 
 -0.618622 -0.620238 -0.932836 
 -0.617347 -0.620238 -0.932836 
 -0.630102 -0.619657 -0.936567 
 -0.628827 -0.619657 -0.932836 
 -0.627551 -0.619657 -0.932836 
 -0.626276 -0.619657 -0.932836 
 -0.623724 -0.619657 -0.932836 
 -0.621173 -0.619657 -0.932836 
 -0.619898 -0.619657 -0.932836 
 -0.618622 -0.619657 -0.932836 
 -0.617347 -0.619657 -0.929104 
 -0.628827 -0.619657 -0.932836 
 -0.627551 -0.619657 -0.932836 
 -0.626276 -0.619657 -0.932836 
 -0.625000 -0.619657 -0.932836 
 -0.622449 -0.619657 -0.932836 
 -0.619898 -0.619657 -0.932836 
 -0.618622 -0.619657 -0.932836 
 -0.617347 -0.619657 -0.929104 
 -0.616071 -0.619657 -0.929104 
 -0.628827 -0.619075 -0.936567 
 -0.627551 -0.619075 -0.932836 
 -0.626276 -0.619075 -0.932836 
 -0.625000 -0.619075 -0.932836 
 -0.622449 -0.619075 -0.932836 
 -0.619898 -0.619075 -0.932836 
 -0.618622 -0.619075 -0.929104 
 -0.617347 -0.619075 -0.929104 
 -0.616071 -0.619075 -0.929104 
 -0.628827 -0.618494 -0.936567 
 -0.627551 -0.618494 -0.932836 
 -0.626276 -0.618494 -0.932836 
 -0.625000 -0.618494 -0.932836 
 -0.622449 -0.618494 -0.929104 
 -0.619898 -0.618494 -0.929104 
 -0.618622 -0.618494 -0.929104 
 -0.617347 -0.618494 -0.929104 
 -0.616071 -0.618494 -0.929104 
 -0.627551 -0.618494 -0.932836 
 -0.626276 -0.618494 -0.932836 
 -0.625000 -0.618494 -0.932836 
 -0.623724 -0.618494 -0.929104 
 -0.621173 -0.618494 -0.929104 
 -0.618622 -0.618494 -0.929104 
 -0.617347 -0.618494 -0.929104 
 -0.616071 -0.618494 -0.929104 
 -0.614796 -0.618494 -0.929104 
 -0.627551 -0.617912 -0.932836 
 -0.626276 -0.617912 -0.929104 
 -0.625000 -0.617912 -0.929104 
 -0.623724 -0.617912 -0.929104 
 -0.621173 -0.617912 -0.929104 
 -0.618622 -0.617912 -0.929104 
 -0.617347 -0.617912 -0.929104 
 -0.616071 -0.617912 -0.929104 
 -0.614796 -0.617912 -0.925373 
 -0.627551 -0.617331 -0.932836 
 -0.626276 -0.617331 -0.929104 
 -0.625000 -0.617331 -0.929104 
 -0.623724 -0.617331 -0.929104 
 -0.621173 -0.617331 -0.925373 
 -0.618622 -0.617331 -0.925373 
 -0.617347 -0.617331 -0.925373 
 -0.616071 -0.617331 -0.925373 
 -0.614796 -0.617331 -0.925373 
 -0.626276 -0.617331 -0.929104 
 -0.625000 -0.617331 -0.929104 
 -0.623724 -0.617331 -0.929104 
 -0.622449 -0.617331 -0.929104 
 -0.619898 -0.617331 -0.925373 
 -0.617347 -0.617331 -0.925373 
 -0.616071 -0.617331 -0.925373 
 -0.614796 -0.617331 -0.925373 
 -0.613520 -0.617331 -0.880597 
 -0.626276 -0.616749 -0.929104 
 -0.625000 -0.616749 -0.929104 
 -0.623724 -0.616749 -0.929104 
 -0.622449 -0.616749 -0.925373 
 -0.619898 -0.616749 -0.925373 
 -0.617347 -0.616749 -0.925373 
 -0.616071 -0.616749 -0.925373 
 -0.614796 -0.616749 -0.906716 
 -0.613520 -0.616749 -0.847015 
 -0.626276 -0.616167 -0.932836 
 -0.625000 -0.616167 -0.932836 
 -0.623724 -0.616167 -0.929104 
 -0.622449 -0.616167 -0.925373 
 -0.619898 -0.616167 -0.925373 
 -0.617347 -0.616167 -0.925373 
 -0.616071 -0.616167 -0.895522 
 -0.614796 -0.616167 -0.854478 
 -0.613520 -0.616167 -0.817164 
 -0.625000 -0.616167 -0.932836 
 -0.623724 -0.616167 -0.929104 
 -0.622449 -0.616167 -0.925373 
 -0.621173 -0.616167 -0.925373 
 -0.618622 -0.616167 -0.925373 
 -0.616071 -0.616167 -0.895522 
 -0.614796 -0.616167 -0.854478 
 -0.613520 -0.616167 -0.817164 
 -0.612245 -0.616167 -0.779851 
 -0.625000 -0.615586 -0.932836 
 -0.623724 -0.615586 -0.929104 
 -0.622449 -0.615586 -0.929104 
 -0.621173 -0.615586 -0.925373 
 -0.618622 -0.615586 -0.925373 
 -0.616071 -0.615586 -0.869403 
 -0.614796 -0.615586 -0.835821 
 -0.613520 -0.615586 -0.798507 
 -0.612245 -0.615586 -0.768657 
 -0.625000 -0.615004 -0.936567 
 -0.623724 -0.615004 -0.932836 
 -0.622449 -0.615004 -0.929104 
 -0.621173 -0.615004 -0.929104 
 -0.618622 -0.615004 -0.917910 
 -0.616071 -0.615004 -0.850746 
 -0.614796 -0.615004 -0.817164 
 -0.613520 -0.615004 -0.783582 
 -0.612245 -0.615004 -0.757463 
 -0.623724 -0.614423 -0.932836 
 -0.622449 -0.614423 -0.929104 
 -0.621173 -0.614423 -0.929104 
 -0.619898 -0.614423 -0.925373 
 -0.617347 -0.614423 -0.876866 
 -0.614796 -0.614423 -0.809701 
 -0.613520 -0.614423 -0.776119 
 -0.612245 -0.614423 -0.750000 
 -0.610969 -0.614423 -0.727612 
 -0.623724 -0.613841 -0.932836 
 -0.622449 -0.613841 -0.929104 
 -0.621173 -0.613841 -0.925373 
 -0.619898 -0.613841 -0.925373 
 -0.617347 -0.613841 -0.865672 
 -0.614796 -0.613841 -0.798507 
 -0.613520 -0.613841 -0.768657 
 -0.612245 -0.613841 -0.742537 
 -0.610969 -0.613841 -0.720149 
 -0.623724 -0.613260 -0.929104 
 -0.622449 -0.613260 -0.925373 
 -0.621173 -0.613260 -0.925373 
 -0.619898 -0.613260 -0.914179 
 -0.617347 -0.613260 -0.858209 
 -0.614796 -0.613260 -0.794776 
 -0.613520 -0.613260 -0.768657 
 -0.612245 -0.613260 -0.742537 
 -0.610969 -0.613260 -0.720149 
 -0.622449 -0.613260 -0.925373 
 -0.621173 -0.613260 -0.925373 
 -0.619898 -0.613260 -0.914179 
 -0.618622 -0.613260 -0.891791 
 -0.616071 -0.613260 -0.828358 
 -0.613520 -0.613260 -0.768657 
 -0.612245 -0.613260 -0.742537 
 -0.610969 -0.613260 -0.720149 
 -0.609694 -0.613260 -0.697761 
 -0.622449 -0.612678 -0.925373 
 -0.621173 -0.612678 -0.917910 
 -0.619898 -0.612678 -0.906716 
 -0.618622 -0.612678 -0.880597 
 -0.616071 -0.612678 -0.824627 
 -0.613520 -0.612678 -0.768657 
 -0.612245 -0.612678 -0.750000 
 -0.610969 -0.612678 -0.727612 
 -0.609694 -0.612678 -0.708955 
 -0.622449 -0.612097 -0.921642 
 -0.621173 -0.612097 -0.906716 
 -0.619898 -0.612097 -0.880597 
 -0.618622 -0.612097 -0.869403 
 -0.616071 -0.612097 -0.832090 
 -0.613520 -0.612097 -0.783582 
 -0.612245 -0.612097 -0.761194 
 -0.610969 -0.612097 -0.742537 
 -0.609694 -0.612097 -0.720149 
 -0.621173 -0.612097 -0.906716 
 -0.619898 -0.612097 -0.880597 
 -0.618622 -0.612097 -0.869403 
 -0.617347 -0.612097 -0.854478 
 -0.614796 -0.612097 -0.805970 
 -0.612245 -0.612097 -0.761194 
 -0.610969 -0.612097 -0.742537 
 -0.609694 -0.612097 -0.720149 
 -0.608418 -0.612097 -0.697761 
 -0.621173 -0.611515 -0.876866 
 -0.619898 -0.611515 -0.858209 
 -0.618622 -0.611515 -0.847015 
 -0.617347 -0.611515 -0.835821 
 -0.614796 -0.611515 -0.813433 
 -0.612245 -0.611515 -0.776119 
 -0.610969 -0.611515 -0.750000 
 -0.609694 -0.611515 -0.723881 
 -0.608418 -0.611515 -0.701493 
 -0.621173 -0.610933 -0.854478 
 -0.619898 -0.610933 -0.835821 
 -0.618622 -0.610933 -0.817164 
 -0.617347 -0.610933 -0.802239 
 -0.614796 -0.610933 -0.776119 
 -0.612245 -0.610933 -0.761194 
 -0.610969 -0.610933 -0.750000 
 -0.609694 -0.610933 -0.727612 
 -0.608418 -0.610933 -0.701493 
 -0.619898 -0.610933 -0.835821 
 -0.618622 -0.610933 -0.817164 
 -0.617347 -0.610933 -0.802239 
 -0.616071 -0.610933 -0.787313 
 -0.613520 -0.610933 -0.768657 
 -0.610969 -0.610933 -0.750000 
 -0.609694 -0.610933 -0.727612 
 -0.608418 -0.610933 -0.701493 
 -0.607143 -0.610933 -0.675373 
 -0.619898 -0.610352 -0.828358 
 -0.618622 -0.610352 -0.805970 
 -0.617347 -0.610352 -0.787313 
 -0.616071 -0.610352 -0.768657 
 -0.613520 -0.610352 -0.746269 
 -0.610969 -0.610352 -0.727612 
 -0.609694 -0.610352 -0.712687 
 -0.608418 -0.610352 -0.690299 
 -0.607143 -0.610352 -0.667910 
 -0.619898 -0.609770 -0.835821 
 -0.618622 -0.609770 -0.809701 
 -0.617347 -0.609770 -0.787313 
 -0.616071 -0.609770 -0.761194 
 -0.613520 -0.609770 -0.727612 
 -0.610969 -0.609770 -0.697761 
 -0.609694 -0.609770 -0.682836 
 -0.608418 -0.609770 -0.664179 
 -0.607143 -0.609770 -0.645522 
 -0.618622 -0.609770 -0.809701 
 -0.617347 -0.609770 -0.787313 
 -0.616071 -0.609770 -0.761194 
 -0.614796 -0.609770 -0.742537 
 -0.612245 -0.609770 -0.708955 
 -0.609694 -0.609770 -0.682836 
 -0.608418 -0.609770 -0.664179 
 -0.607143 -0.609770 -0.645522 
 -0.605867 -0.609770 -0.623134 
 -0.618622 -0.609189 -0.817164 
 -0.617347 -0.609189 -0.794776 
 -0.616071 -0.609189 -0.768657 
 -0.614796 -0.609189 -0.750000 
 -0.612245 -0.609189 -0.708955 
 -0.609694 -0.609189 -0.671642 
 -0.608418 -0.609189 -0.649254 
 -0.607143 -0.609189 -0.626866 
 -0.605867 -0.609189 -0.608209 
 -0.618622 -0.608607 -0.828358 
 -0.617347 -0.608607 -0.805970 
 -0.616071 -0.608607 -0.783582 
 -0.614796 -0.608607 -0.761194 
 -0.612245 -0.608607 -0.716418 
 -0.609694 -0.608607 -0.671642 
 -0.608418 -0.608607 -0.649254 
 -0.607143 -0.608607 -0.626866 
 -0.605867 -0.608607 -0.600746 
 -0.617347 -0.608607 -0.805970 
 -0.616071 -0.608607 -0.783582 
 -0.614796 -0.608607 -0.761194 
 -0.613520 -0.608607 -0.738806 
 -0.610969 -0.608607 -0.694030 
 -0.608418 -0.608607 -0.649254 
 -0.607143 -0.608607 -0.626866 
 -0.605867 -0.608607 -0.600746 
 -0.604592 -0.608607 -0.574627 
 -0.617347 -0.608026 -0.802239 
 -0.616071 -0.608026 -0.783582 
 -0.614796 -0.608026 -0.764925 
 -0.613520 -0.608026 -0.742537 
 -0.610969 -0.608026 -0.701493 
 -0.608418 -0.608026 -0.652985 
 -0.607143 -0.608026 -0.626866 
 -0.605867 -0.608026 -0.600746 
 -0.604592 -0.608026 -0.570896 
 -0.617347 -0.607444 -0.772388 
 -0.616071 -0.607444 -0.761194 
 -0.614796 -0.607444 -0.742537 
 -0.613520 -0.607444 -0.731343 
 -0.610969 -0.607444 -0.697761 
 -0.608418 -0.607444 -0.656716 
 -0.607143 -0.607444 -0.630597 
 -0.605867 -0.607444 -0.604478 
 -0.604592 -0.607444 -0.578358 
 -0.616071 -0.607444 -0.761194 
 -0.614796 -0.607444 -0.742537 
 -0.613520 -0.607444 -0.731343 
 -0.612245 -0.607444 -0.716418 
 -0.609694 -0.607444 -0.679104 
 -0.607143 -0.607444 -0.630597 
 -0.605867 -0.607444 -0.604478 
 -0.604592 -0.607444 -0.578358 
 -0.603316 -0.607444 -0.544776 
 -0.616071 -0.606862 -0.735075 
 -0.614796 -0.606862 -0.723881 
 -0.613520 -0.606862 -0.712687 
 -0.612245 -0.606862 -0.701493 
 -0.609694 -0.606862 -0.671642 
 -0.607143 -0.606862 -0.630597 
 -0.605867 -0.606862 -0.608209 
 -0.604592 -0.606862 -0.582090 
 -0.603316 -0.606862 -0.548507 
 -0.616071 -0.606281 -0.697761 
 -0.614796 -0.606281 -0.686567 
 -0.613520 -0.606281 -0.679104 
 -0.612245 -0.606281 -0.671642 
 -0.609694 -0.606281 -0.641791 
 -0.607143 -0.606281 -0.611940 
 -0.605867 -0.606281 -0.593284 
 -0.604592 -0.606281 -0.570896 
 -0.603316 -0.606281 -0.541045 
 -0.616071 -0.605699 -0.679104 
 -0.614796 -0.605699 -0.660448 
 -0.613520 -0.605699 -0.652985 
 -0.612245 -0.605699 -0.641791 
 -0.609694 -0.605699 -0.615672 
 -0.607143 -0.605699 -0.589552 
 -0.605867 -0.605699 -0.574627 
 -0.604592 -0.605699 -0.552239 
 -0.603316 -0.605699 -0.526119 
 -0.614796 -0.605699 -0.660448 
 -0.613520 -0.605699 -0.652985 
 -0.612245 -0.605699 -0.641791 
 -0.610969 -0.605699 -0.630597 
 -0.608418 -0.605699 -0.600746 
 -0.605867 -0.605699 -0.574627 
 -0.604592 -0.605699 -0.552239 
 -0.603316 -0.605699 -0.526119 
 -0.602041 -0.605699 -0.500000 
 -0.614796 -0.605118 -0.656716 
 -0.613520 -0.605118 -0.634328 
 -0.612245 -0.605118 -0.611940 
 -0.610969 -0.605118 -0.593284 
 -0.608418 -0.605118 -0.563433 
 -0.605867 -0.605118 -0.537313 
 -0.604592 -0.605118 -0.522388 
 -0.603316 -0.605118 -0.500000 
 -0.602041 -0.605118 -0.481343 
 -0.614796 -0.604536 -0.667910 
 -0.613520 -0.604536 -0.641791 
 -0.612245 -0.604536 -0.611940 
 -0.610969 -0.604536 -0.585821 
 -0.608418 -0.604536 -0.548507 
 -0.605867 -0.604536 -0.514925 
 -0.604592 -0.604536 -0.500000 
 -0.603316 -0.604536 -0.481343 
 -0.602041 -0.604536 -0.462687 
 -0.613520 -0.604536 -0.641791 
 -0.612245 -0.604536 -0.611940 
 -0.610969 -0.604536 -0.585821 
 -0.609694 -0.604536 -0.567164 
 -0.607143 -0.604536 -0.529851 
 -0.604592 -0.604536 -0.500000 
 -0.603316 -0.604536 -0.481343 
 -0.602041 -0.604536 -0.462687 
 -0.600765 -0.604536 -0.444030 
 -0.613520 -0.603955 -0.645522 
 -0.612245 -0.603955 -0.611940 
 -0.610969 -0.603955 -0.585821 
 -0.609694 -0.603955 -0.563433 
 -0.607143 -0.603955 -0.526119 
 -0.604592 -0.603955 -0.488806 
 -0.603316 -0.603955 -0.473881 
 -0.602041 -0.603955 -0.458955 
 -0.600765 -0.603955 -0.444030 
 -0.613520 -0.603373 -0.649254 
 -0.612245 -0.603373 -0.623134 
 -0.610969 -0.603373 -0.597015 
 -0.609694 -0.603373 -0.578358 
 -0.607143 -0.603373 -0.541045 
 -0.604592 -0.603373 -0.503731 
 -0.603316 -0.603373 -0.488806 
 -0.602041 -0.603373 -0.481343 
 -0.600765 -0.603373 -0.473881 
 -0.612245 -0.603373 -0.623134 
 -0.610969 -0.603373 -0.597015 
 -0.609694 -0.603373 -0.578358 
 -0.608418 -0.603373 -0.559701 
 -0.605867 -0.603373 -0.522388 
 -0.603316 -0.603373 -0.488806 
 -0.602041 -0.603373 -0.481343 
 -0.600765 -0.603373 -0.473881 
 -0.599490 -0.603373 -0.462687 
 -0.612245 -0.602792 -0.630597 
 -0.610969 -0.602792 -0.611940 
 -0.609694 -0.602792 -0.593284 
 -0.608418 -0.602792 -0.574627 
 -0.605867 -0.602792 -0.541045 
 -0.603316 -0.602792 -0.511194 
 -0.602041 -0.602792 -0.503731 
 -0.600765 -0.602792 -0.492537 
 -0.599490 -0.602792 -0.485075 
 -0.612245 -0.602210 -0.656716 
 -0.610969 -0.602210 -0.638060 
 -0.609694 -0.602210 -0.619403 
 -0.608418 -0.602210 -0.600746 
 -0.605867 -0.602210 -0.570896 
 -0.603316 -0.602210 -0.548507 
 -0.602041 -0.602210 -0.537313 
 -0.600765 -0.602210 -0.529851 
 -0.599490 -0.602210 -0.522388 
 -0.610969 -0.602210 -0.638060 
 -0.609694 -0.602210 -0.619403 
 -0.608418 -0.602210 -0.600746 
 -0.607143 -0.602210 -0.585821 
 -0.604592 -0.602210 -0.555970 
 -0.602041 -0.602210 -0.537313 
 -0.600765 -0.602210 -0.529851 
 -0.599490 -0.602210 -0.522388 
 -0.598214 -0.602210 -0.511194 
 -0.610969 -0.601628 -0.660448 
 -0.609694 -0.601628 -0.641791 
 -0.608418 -0.601628 -0.623134 
 -0.607143 -0.601628 -0.604478 
 -0.604592 -0.601628 -0.582090 
 -0.602041 -0.601628 -0.563433 
 -0.600765 -0.601628 -0.555970 
 -0.599490 -0.601628 -0.544776 
 -0.598214 -0.601628 -0.533582 
 -0.610969 -0.601047 -0.686567 
 -0.609694 -0.601047 -0.667910 
 -0.608418 -0.601047 -0.652985 
 -0.607143 -0.601047 -0.638060 
 -0.604592 -0.601047 -0.615672 
 -0.602041 -0.601047 -0.600746 
 -0.600765 -0.601047 -0.593284 
 -0.599490 -0.601047 -0.585821 
 -0.598214 -0.601047 -0.567164 
 -0.609694 -0.601047 -0.667910 
 -0.608418 -0.601047 -0.652985 
 -0.607143 -0.601047 -0.638060 
 -0.605867 -0.601047 -0.623134 
 -0.603316 -0.601047 -0.608209 
 -0.600765 -0.601047 -0.593284 
 -0.599490 -0.601047 -0.585821 
 -0.598214 -0.601047 -0.567164 
 -0.596939 -0.601047 -0.544776 
 -0.609694 -0.600465 -0.686567 
 -0.608418 -0.600465 -0.671642 
 -0.607143 -0.600465 -0.656716 
 -0.605867 -0.600465 -0.645522 
 -0.603316 -0.600465 -0.630597 
 -0.600765 -0.600465 -0.615672 
 -0.599490 -0.600465 -0.600746 
 -0.598214 -0.600465 -0.578358 
 -0.596939 -0.600465 -0.552239 
 -0.609694 -0.599884 -0.712687 
 -0.608418 -0.599884 -0.697761 
 -0.607143 -0.599884 -0.686567 
 -0.605867 -0.599884 -0.679104 
 -0.603316 -0.599884 -0.667910 
 -0.600765 -0.599884 -0.634328 
 -0.599490 -0.599884 -0.611940 
 -0.598214 -0.599884 -0.585821 
 -0.596939 -0.599884 -0.563433 
 -0.608418 -0.599884 -0.697761 
 -0.607143 -0.599884 -0.686567 
 -0.605867 -0.599884 -0.679104 
 -0.604592 -0.599884 -0.671642 
 -0.602041 -0.599884 -0.656716 
 -0.599490 -0.599884 -0.611940 
 -0.598214 -0.599884 -0.585821 
 -0.596939 -0.599884 -0.563433 
 -0.595663 -0.599884 -0.541045 
 -0.608418 -0.599302 -0.716418 
 -0.607143 -0.599302 -0.701493 
 -0.605867 -0.599302 -0.694030 
 -0.604592 -0.599302 -0.686567 
 -0.602041 -0.599302 -0.667910 
 -0.599490 -0.599302 -0.623134 
 -0.598214 -0.599302 -0.600746 
 -0.596939 -0.599302 -0.578358 
 -0.595663 -0.599302 -0.559701 
 -0.608418 -0.598721 -0.738806 
 -0.607143 -0.598721 -0.723881 
 -0.605867 -0.598721 -0.705224 
 -0.604592 -0.598721 -0.694030 
 -0.602041 -0.598721 -0.682836 
 -0.599490 -0.598721 -0.641791 
 -0.598214 -0.598721 -0.623134 
 -0.596939 -0.598721 -0.604478 
 -0.595663 -0.598721 -0.585821 
 -0.608418 -0.598139 -0.750000 
 -0.607143 -0.598139 -0.735075 
 -0.605867 -0.598139 -0.716418 
 -0.604592 -0.598139 -0.697761 
 -0.602041 -0.598139 -0.686567 
 -0.599490 -0.598139 -0.656716 
 -0.598214 -0.598139 -0.638060 
 -0.596939 -0.598139 -0.619403 
 -0.595663 -0.598139 -0.597015 
 -0.607143 -0.598139 -0.735075 
 -0.605867 -0.598139 -0.716418 
 -0.604592 -0.598139 -0.697761 
 -0.603316 -0.598139 -0.694030 
 -0.600765 -0.598139 -0.679104 
 -0.598214 -0.598139 -0.638060 
 -0.596939 -0.598139 -0.619403 
 -0.595663 -0.598139 -0.597015 
 -0.594388 -0.598139 -0.574627 
 -0.607143 -0.597557 -0.746269 
 -0.605867 -0.597557 -0.727612 
 -0.604592 -0.597557 -0.712687 
 -0.603316 -0.597557 -0.697761 
 -0.600765 -0.597557 -0.671642 
 -0.598214 -0.597557 -0.630597 
 -0.596939 -0.597557 -0.611940 
 -0.595663 -0.597557 -0.593284 
 -0.594388 -0.597557 -0.570896 
 -0.607143 -0.596976 -0.753731 
 -0.605867 -0.596976 -0.735075 
 -0.604592 -0.596976 -0.716418 
 -0.603316 -0.596976 -0.697761 
 -0.600765 -0.596976 -0.664179 
 -0.598214 -0.596976 -0.623134 
 -0.596939 -0.596976 -0.604478 
 -0.595663 -0.596976 -0.585821 
 -0.594388 -0.596976 -0.563433 
 -0.605867 -0.596976 -0.735075 
 -0.604592 -0.596976 -0.716418 
 -0.603316 -0.596976 -0.697761 
 -0.602041 -0.596976 -0.682836 
 -0.599490 -0.596976 -0.641791 
 -0.596939 -0.596976 -0.604478 
 -0.595663 -0.596976 -0.585821 
 -0.594388 -0.596976 -0.563433 
 -0.593112 -0.596976 -0.541045 
 -0.605867 -0.596394 -0.738806 
 -0.604592 -0.596394 -0.723881 
 -0.603316 -0.596394 -0.705224 
 -0.602041 -0.596394 -0.686567 
 -0.599490 -0.596394 -0.645522 
 -0.596939 -0.596394 -0.600746 
 -0.595663 -0.596394 -0.574627 
 -0.594388 -0.596394 -0.552239 
 -0.593112 -0.596394 -0.533582 
 -0.605867 -0.595813 -0.746269 
 -0.604592 -0.595813 -0.731343 
 -0.603316 -0.595813 -0.716418 
 -0.602041 -0.595813 -0.690299 
 -0.599490 -0.595813 -0.652985 
 -0.596939 -0.595813 -0.604478 
 -0.595663 -0.595813 -0.574627 
 -0.594388 -0.595813 -0.552239 
 -0.593112 -0.595813 -0.529851 
 -0.604592 -0.595813 -0.731343 
 -0.603316 -0.595813 -0.716418 
 -0.602041 -0.595813 -0.690299 
 -0.600765 -0.595813 -0.671642 
 -0.598214 -0.595813 -0.630597 
 -0.595663 -0.595813 -0.574627 
 -0.594388 -0.595813 -0.552239 
 -0.593112 -0.595813 -0.529851 
 -0.591837 -0.595813 -0.507463 
 -0.604592 -0.595231 -0.716418 
 -0.603316 -0.595231 -0.712687 
 -0.602041 -0.595231 -0.697761 
 -0.600765 -0.595231 -0.686567 
 -0.598214 -0.595231 -0.638060 
 -0.595663 -0.595231 -0.578358 
 -0.594388 -0.595231 -0.555970 
 -0.593112 -0.595231 -0.529851 
 -0.591837 -0.595231 -0.507463 
 -0.604592 -0.594650 -0.694030 
 -0.603316 -0.594650 -0.686567 
 -0.602041 -0.594650 -0.682836 
 -0.600765 -0.594650 -0.675373 
 -0.598214 -0.594650 -0.649254 
 -0.595663 -0.594650 -0.589552 
 -0.594388 -0.594650 -0.563433 
 -0.593112 -0.594650 -0.537313 
 -0.591837 -0.594650 -0.511194 
 -0.603316 -0.594650 -0.686567 
 -0.602041 -0.594650 -0.682836 
 -0.600765 -0.594650 -0.675373 
 -0.599490 -0.594650 -0.667910 
 -0.596939 -0.594650 -0.619403 
 -0.594388 -0.594650 -0.563433 
 -0.593112 -0.594650 -0.537313 
 -0.591837 -0.594650 -0.511194 
 -0.590561 -0.594650 -0.485075 
 -0.603316 -0.594068 -0.664179 
 -0.602041 -0.594068 -0.656716 
 -0.600765 -0.594068 -0.652985 
 -0.599490 -0.594068 -0.649254 
 -0.596939 -0.594068 -0.619403 
 -0.594388 -0.594068 -0.567164 
 -0.593112 -0.594068 -0.541045 
 -0.591837 -0.594068 -0.511194 
 -0.590561 -0.594068 -0.485075 
 -0.603316 -0.593486 -0.623134 
 -0.602041 -0.593486 -0.615672 
 -0.600765 -0.593486 -0.611940 
 -0.599490 -0.593486 -0.611940 
 -0.596939 -0.593486 -0.604478 
 -0.594388 -0.593486 -0.563433 
 -0.593112 -0.593486 -0.537313 
 -0.591837 -0.593486 -0.511194 
 -0.590561 -0.593486 -0.485075 
 -0.602041 -0.593486 -0.615672 
 -0.600765 -0.593486 -0.611940 
 -0.599490 -0.593486 -0.611940 
 -0.598214 -0.593486 -0.611940 
 -0.595663 -0.593486 -0.589552 
 -0.593112 -0.593486 -0.537313 
 -0.591837 -0.593486 -0.511194 
 -0.590561 -0.593486 -0.485075 
 -0.589286 -0.593486 -0.458955 
 -0.602041 -0.592905 -0.585821 
 -0.600765 -0.592905 -0.582090 
 -0.599490 -0.592905 -0.582090 
 -0.598214 -0.592905 -0.585821 
 -0.595663 -0.592905 -0.567164 
 -0.593112 -0.592905 -0.537313 
 -0.591837 -0.592905 -0.511194 
 -0.590561 -0.592905 -0.485075 
 -0.589286 -0.592905 -0.458955 
 -0.602041 -0.592323 -0.559701 
 -0.600765 -0.592323 -0.548507 
 -0.599490 -0.592323 -0.541045 
 -0.598214 -0.592323 -0.537313 
 -0.595663 -0.592323 -0.522388 
 -0.593112 -0.592323 -0.511194 
 -0.591837 -0.592323 -0.503731 
 -0.590561 -0.592323 -0.485075 
 -0.589286 -0.592323 -0.458955 
 -0.600765 -0.591742 -0.533582 
 -0.599490 -0.591742 -0.522388 
 -0.598214 -0.591742 -0.511194 
 -0.596939 -0.591742 -0.503731 
 -0.594388 -0.591742 -0.492537 
 -0.591837 -0.591742 -0.473881 
 -0.590561 -0.591742 -0.462687 
 -0.589286 -0.591742 -0.440299 
 -0.588010 -0.591742 -0.421642 
 -0.600765 -0.591160 -0.529851 
 -0.599490 -0.591160 -0.511194 
 -0.598214 -0.591160 -0.496269 
 -0.596939 -0.591160 -0.477612 
 -0.594388 -0.591160 -0.451493 
 -0.591837 -0.591160 -0.436567 
 -0.590561 -0.591160 -0.417910 
 -0.589286 -0.591160 -0.402985 
 -0.588010 -0.591160 -0.388060 
 -0.600765 -0.590579 -0.559701 
 -0.599490 -0.590579 -0.537313 
 -0.598214 -0.590579 -0.503731 
 -0.596939 -0.590579 -0.481343 
 -0.594388 -0.590579 -0.440299 
 -0.591837 -0.590579 -0.410448 
 -0.590561 -0.590579 -0.395522 
 -0.589286 -0.590579 -0.384328 
 -0.588010 -0.590579 -0.369403 
 -0.599490 -0.590579 -0.537313 
 -0.598214 -0.590579 -0.503731 
 -0.596939 -0.590579 -0.481343 
 -0.595663 -0.590579 -0.458955 
 -0.593112 -0.590579 -0.421642 
 -0.590561 -0.590579 -0.395522 
 -0.589286 -0.590579 -0.384328 
 -0.588010 -0.590579 -0.369403 
 -0.586735 -0.590579 -0.358209 
 -0.599490 -0.589997 -0.555970 
 -0.598214 -0.589997 -0.526119 
 -0.596939 -0.589997 -0.500000 
 -0.595663 -0.589997 -0.473881 
 -0.593112 -0.589997 -0.417910 
 -0.590561 -0.589997 -0.380597 
 -0.589286 -0.589997 -0.361940 
 -0.588010 -0.589997 -0.350746 
 -0.586735 -0.589997 -0.335821 
 -0.599490 -0.589416 -0.552239 
 -0.598214 -0.589416 -0.533582 
 -0.596939 -0.589416 -0.507463 
 -0.595663 -0.589416 -0.477612 
 -0.593112 -0.589416 -0.417910 
 -0.590561 -0.589416 -0.376866 
 -0.589286 -0.589416 -0.361940 
 -0.588010 -0.589416 -0.347015 
 -0.586735 -0.589416 -0.335821 
 -0.598214 -0.589416 -0.533582 
 -0.596939 -0.589416 -0.507463 
 -0.595663 -0.589416 -0.477612 
 -0.594388 -0.589416 -0.447761 
 -0.591837 -0.589416 -0.391791 
 -0.589286 -0.589416 -0.361940 
 -0.588010 -0.589416 -0.347015 
 -0.586735 -0.589416 -0.335821 
 -0.585459 -0.589416 -0.332090 
 -0.598214 -0.588834 -0.496269 
 -0.596939 -0.588834 -0.481343 
 -0.595663 -0.588834 -0.466418 
 -0.594388 -0.588834 -0.440299 
 -0.591837 -0.588834 -0.391791 
 -0.589286 -0.588834 -0.369403 
 -0.588010 -0.588834 -0.369403 
 -0.586735 -0.588834 -0.369403 
 -0.585459 -0.588834 -0.361940 
 -0.598214 -0.588252 -0.485075 
 -0.596939 -0.588252 -0.466418 
 -0.595663 -0.588252 -0.447761 
 -0.594388 -0.588252 -0.432836 
 -0.591837 -0.588252 -0.395522 
 -0.589286 -0.588252 -0.391791 
 -0.588010 -0.588252 -0.395522 
 -0.586735 -0.588252 -0.388060 
 -0.585459 -0.588252 -0.380597 
 -0.596939 -0.588252 -0.466418 
 -0.595663 -0.588252 -0.447761 
 -0.594388 -0.588252 -0.432836 
 -0.593112 -0.588252 -0.410448 
 -0.590561 -0.588252 -0.391791 
 -0.588010 -0.588252 -0.395522 
 -0.586735 -0.588252 -0.388060 
 -0.585459 -0.588252 -0.380597 
 -0.584184 -0.588252 -0.373134 
 -0.596939 -0.587671 -0.466418 
 -0.595663 -0.587671 -0.451493 
 -0.594388 -0.587671 -0.440299 
 -0.593112 -0.587671 -0.425373 
 -0.590561 -0.587671 -0.432836 
 -0.588010 -0.587671 -0.444030 
 -0.586735 -0.587671 -0.436567 
 -0.585459 -0.587671 -0.421642 
 -0.584184 -0.587671 -0.410448 
 -0.596939 -0.587089 -0.477612 
 -0.595663 -0.587089 -0.462687 
 -0.594388 -0.587089 -0.451493 
 -0.593112 -0.587089 -0.436567 
 -0.590561 -0.587089 -0.458955 
 -0.588010 -0.587089 -0.477612 
 -0.586735 -0.587089 -0.477612 
 -0.585459 -0.587089 -0.462687 
 -0.584184 -0.587089 -0.444030 
 -0.595663 -0.587089 -0.462687 
 -0.594388 -0.587089 -0.451493 
 -0.593112 -0.587089 -0.436567 
 -0.591837 -0.587089 -0.447761 
 -0.589286 -0.587089 -0.466418 
 -0.586735 -0.587089 -0.477612 
 -0.585459 -0.587089 -0.462687 
 -0.584184 -0.587089 -0.444030 
 -0.582908 -0.587089 -0.432836 
 -0.595663 -0.586508 -0.477612 
 -0.594388 -0.586508 -0.462687 
 -0.593112 -0.586508 -0.455224 
 -0.591837 -0.586508 -0.466418 
 -0.589286 -0.586508 -0.492537 
 -0.586735 -0.586508 -0.507463 
 -0.585459 -0.586508 -0.500000 
 -0.584184 -0.586508 -0.481343 
 -0.582908 -0.586508 -0.470149 
 -0.595663 -0.585926 -0.492537 
 -0.594388 -0.585926 -0.481343 
 -0.593112 -0.585926 -0.481343 
 -0.591837 -0.585926 -0.496269 
 -0.589286 -0.585926 -0.526119 
 -0.586735 -0.585926 -0.533582 
 -0.585459 -0.585926 -0.518657 
 -0.584184 -0.585926 -0.503731 
 -0.582908 -0.585926 -0.496269 
 -0.594388 -0.585926 -0.481343 
 -0.593112 -0.585926 -0.481343 
 -0.591837 -0.585926 -0.496269 
 -0.590561 -0.585926 -0.511194 
 -0.588010 -0.585926 -0.537313 
 -0.585459 -0.585926 -0.518657 
 -0.584184 -0.585926 -0.503731 
 -0.582908 -0.585926 -0.496269 
 -0.581633 -0.585926 -0.492537 
 -0.594388 -0.585345 -0.492537 
 -0.593112 -0.585345 -0.500000 
 -0.591837 -0.585345 -0.514925 
 -0.590561 -0.585345 -0.533582 
 -0.588010 -0.585345 -0.559701 
 -0.585459 -0.585345 -0.537313 
 -0.584184 -0.585345 -0.522388 
 -0.582908 -0.585345 -0.514925 
 -0.581633 -0.585345 -0.514925 
 -0.594388 -0.584763 -0.526119 
 -0.593112 -0.584763 -0.529851 
 -0.591837 -0.584763 -0.541045 
 -0.590561 -0.584763 -0.559701 
 -0.588010 -0.584763 -0.593284 
 -0.585459 -0.584763 -0.563433 
 -0.584184 -0.584763 -0.552239 
 -0.582908 -0.584763 -0.544776 
 -0.581633 -0.584763 -0.541045 
 -0.594388 -0.584181 -0.544776 
 -0.593112 -0.584181 -0.548507 
 -0.591837 -0.584181 -0.559701 
 -0.590561 -0.584181 -0.578358 
 -0.588010 -0.584181 -0.608209 
 -0.585459 -0.584181 -0.582090 
 -0.584184 -0.584181 -0.570896 
 -0.582908 -0.584181 -0.567164 
 -0.581633 -0.584181 -0.563433 
 -0.593112 -0.584181 -0.548507 
 -0.591837 -0.584181 -0.559701 
 -0.590561 -0.584181 -0.578358 
 -0.589286 -0.584181 -0.604478 
 -0.586735 -0.584181 -0.593284 
 -0.584184 -0.584181 -0.570896 
 -0.582908 -0.584181 -0.567164 
 -0.581633 -0.584181 -0.563433 
 -0.580357 -0.584181 -0.555970 
 -0.593112 -0.583600 -0.578358 
 -0.591837 -0.583600 -0.585821 
 -0.590561 -0.583600 -0.608209 
 -0.589286 -0.583600 -0.623134 
 -0.586735 -0.583600 -0.611940 
 -0.584184 -0.583600 -0.597015 
 -0.582908 -0.583600 -0.593284 
 -0.581633 -0.583600 -0.582090 
 -0.580357 -0.583600 -0.563433 
 -0.593112 -0.583018 -0.597015 
 -0.591837 -0.583018 -0.604478 
 -0.590561 -0.583018 -0.623134 
 -0.589286 -0.583018 -0.638060 
 -0.586735 -0.583018 -0.626866 
 -0.584184 -0.583018 -0.608209 
 -0.582908 -0.583018 -0.597015 
 -0.581633 -0.583018 -0.585821 
 -0.580357 -0.583018 -0.563433 
 -0.591837 -0.583018 -0.604478 
 -0.590561 -0.583018 -0.623134 
 -0.589286 -0.583018 -0.638060 
 -0.588010 -0.583018 -0.634328 
 -0.585459 -0.583018 -0.615672 
 -0.582908 -0.583018 -0.597015 
 -0.581633 -0.583018 -0.585821 
 -0.580357 -0.583018 -0.563433 
 -0.579082 -0.583018 -0.541045 
 -0.591837 -0.582437 -0.649254 
 -0.590561 -0.582437 -0.656716 
 -0.589286 -0.582437 -0.656716 
 -0.588010 -0.582437 -0.649254 
 -0.585459 -0.582437 -0.626866 
 -0.582908 -0.582437 -0.597015 
 -0.581633 -0.582437 -0.578358 
 -0.580357 -0.582437 -0.555970 
 -0.579082 -0.582437 -0.533582 
 -0.591837 -0.581855 -0.667910 
 -0.590561 -0.581855 -0.667910 
 -0.589286 -0.581855 -0.664179 
 -0.588010 -0.581855 -0.656716 
 -0.585459 -0.581855 -0.623134 
 -0.582908 -0.581855 -0.585821 
 -0.581633 -0.581855 -0.563433 
 -0.580357 -0.581855 -0.541045 
 -0.579082 -0.581855 -0.522388 
 -0.590561 -0.581855 -0.667910 
 -0.589286 -0.581855 -0.664179 
 -0.588010 -0.581855 -0.656716 
 -0.586735 -0.581855 -0.641791 
 -0.584184 -0.581855 -0.604478 
 -0.581633 -0.581855 -0.563433 
 -0.580357 -0.581855 -0.541045 
 -0.579082 -0.581855 -0.522388 
 -0.577806 -0.581855 -0.500000 
 -0.590561 -0.581274 -0.682836 
 -0.589286 -0.581274 -0.664179 
 -0.588010 -0.581274 -0.645522 
 -0.586735 -0.581274 -0.623134 
 -0.584184 -0.581274 -0.585821 
 -0.581633 -0.581274 -0.541045 
 -0.580357 -0.581274 -0.518657 
 -0.579082 -0.581274 -0.496269 
 -0.577806 -0.581274 -0.477612 
 -0.590561 -0.580692 -0.671642 
 -0.589286 -0.580692 -0.649254 
 -0.588010 -0.580692 -0.626866 
 -0.586735 -0.580692 -0.608209 
 -0.584184 -0.580692 -0.570896 
 -0.581633 -0.580692 -0.529851 
 -0.580357 -0.580692 -0.507463 
 -0.579082 -0.580692 -0.481343 
 -0.577806 -0.580692 -0.462687 
 -0.589286 -0.580692 -0.649254 
 -0.588010 -0.580692 -0.626866 
 -0.586735 -0.580692 -0.608209 
 -0.585459 -0.580692 -0.593284 
 -0.582908 -0.580692 -0.552239 
 -0.580357 -0.580692 -0.507463 
 -0.579082 -0.580692 -0.481343 
 -0.577806 -0.580692 -0.462687 
 -0.576531 -0.580692 -0.440299 
 -0.589286 -0.580110 -0.645522 
 -0.588010 -0.580110 -0.626866 
 -0.586735 -0.580110 -0.604478 
 -0.585459 -0.580110 -0.585821 
 -0.582908 -0.580110 -0.544776 
 -0.580357 -0.580110 -0.503731 
 -0.579082 -0.580110 -0.481343 
 -0.577806 -0.580110 -0.462687 
 -0.576531 -0.580110 -0.444030 
 -0.589286 -0.579529 -0.649254 
 -0.588010 -0.579529 -0.634328 
 -0.586735 -0.579529 -0.615672 
 -0.585459 -0.579529 -0.593284 
 -0.582908 -0.579529 -0.552239 
 -0.580357 -0.579529 -0.514925 
 -0.579082 -0.579529 -0.492537 
 -0.577806 -0.579529 -0.473881 
 -0.576531 -0.579529 -0.455224 
 -0.588010 -0.579529 -0.634328 
 -0.586735 -0.579529 -0.615672 
 -0.585459 -0.579529 -0.593284 
 -0.584184 -0.579529 -0.570896 
 -0.581633 -0.579529 -0.533582 
 -0.579082 -0.579529 -0.492537 
 -0.577806 -0.579529 -0.473881 
 -0.576531 -0.579529 -0.455224 
 -0.575255 -0.579529 -0.429104 
 -0.588010 -0.578947 -0.645522 
 -0.586735 -0.578947 -0.626866 
 -0.585459 -0.578947 -0.615672 
 -0.584184 -0.578947 -0.593284 
 -0.581633 -0.578947 -0.555970 
 -0.579082 -0.578947 -0.518657 
 -0.577806 -0.578947 -0.496269 
 -0.576531 -0.578947 -0.477612 
 -0.575255 -0.578947 -0.455224 
 -0.588010 -0.578366 -0.638060 
 -0.586735 -0.578366 -0.630597 
 -0.585459 -0.578366 -0.619403 
 -0.584184 -0.578366 -0.604478 
 -0.581633 -0.578366 -0.567164 
 -0.579082 -0.578366 -0.526119 
 -0.577806 -0.578366 -0.503731 
 -0.576531 -0.578366 -0.481343 
 -0.575255 -0.578366 -0.455224 
 -0.586735 -0.578366 -0.630597 
 -0.585459 -0.578366 -0.619403 
 -0.584184 -0.578366 -0.604478 
 -0.582908 -0.578366 -0.589552 
 -0.580357 -0.578366 -0.544776 
 -0.577806 -0.578366 -0.503731 
 -0.576531 -0.578366 -0.481343 
 -0.575255 -0.578366 -0.455224 
 -0.573980 -0.578366 -0.432836 
 -0.586735 -0.577784 -0.608209 
 -0.585459 -0.577784 -0.597015 
 -0.584184 -0.577784 -0.585821 
 -0.582908 -0.577784 -0.574627 
 -0.580357 -0.577784 -0.529851 
 -0.577806 -0.577784 -0.492537 
 -0.576531 -0.577784 -0.473881 
 -0.575255 -0.577784 -0.451493 
 -0.573980 -0.577784 -0.425373 
 -0.586735 -0.577203 -0.574627 
 -0.585459 -0.577203 -0.563433 
 -0.584184 -0.577203 -0.548507 
 -0.582908 -0.577203 -0.537313 
 -0.580357 -0.577203 -0.511194 
 -0.577806 -0.577203 -0.477612 
 -0.576531 -0.577203 -0.455224 
 -0.575255 -0.577203 -0.436567 
 -0.573980 -0.577203 -0.417910 
 -0.586735 -0.576621 -0.552239 
 -0.585459 -0.576621 -0.541045 
 -0.584184 -0.576621 -0.526119 
 -0.582908 -0.576621 -0.511194 
 -0.580357 -0.576621 -0.485075 
 -0.577806 -0.576621 -0.451493 
 -0.576531 -0.576621 -0.436567 
 -0.575255 -0.576621 -0.421642 
 -0.573980 -0.576621 -0.417910 
 -0.585459 -0.576621 -0.541045 
 -0.584184 -0.576621 -0.526119 
 -0.582908 -0.576621 -0.511194 
 -0.581633 -0.576621 -0.503731 
 -0.579082 -0.576621 -0.466418 
 -0.576531 -0.576621 -0.436567 
 -0.575255 -0.576621 -0.421642 
 -0.573980 -0.576621 -0.417910 
 -0.572704 -0.576621 -0.417910 
 -0.585459 -0.576040 -0.514925 
 -0.584184 -0.576040 -0.492537 
 -0.582908 -0.576040 -0.481343 
 -0.581633 -0.576040 -0.470149 
 -0.579082 -0.576040 -0.455224 
 -0.576531 -0.576040 -0.447761 
 -0.575255 -0.576040 -0.447761 
 -0.573980 -0.576040 -0.451493 
 -0.572704 -0.576040 -0.455224 
 -0.585459 -0.575458 -0.503731 
 -0.584184 -0.575458 -0.488806 
 -0.582908 -0.575458 -0.481343 
 -0.581633 -0.575458 -0.473881 
 -0.579082 -0.575458 -0.466418 
 -0.576531 -0.575458 -0.466418 
 -0.575255 -0.575458 -0.470149 
 -0.573980 -0.575458 -0.473881 
 -0.572704 -0.575458 -0.477612 
 -0.584184 -0.575458 -0.488806 
 -0.582908 -0.575458 -0.481343 
 -0.581633 -0.575458 -0.473881 
 -0.580357 -0.575458 -0.466418 
 -0.577806 -0.575458 -0.462687 
 -0.575255 -0.575458 -0.470149 
 -0.573980 -0.575458 -0.473881 
 -0.572704 -0.575458 -0.477612 
 -0.571429 -0.575458 -0.481343 
 -0.584184 -0.574876 -0.500000 
 -0.582908 -0.574876 -0.492537 
 -0.581633 -0.574876 -0.492537 
 -0.580357 -0.574876 -0.488806 
 -0.577806 -0.574876 -0.496269 
 -0.575255 -0.574876 -0.507463 
 -0.573980 -0.574876 -0.511194 
 -0.572704 -0.574876 -0.514925 
 -0.571429 -0.574876 -0.514925 
 -0.584184 -0.574295 -0.526119 
 -0.582908 -0.574295 -0.518657 
 -0.581633 -0.574295 -0.514925 
 -0.580357 -0.574295 -0.514925 
 -0.577806 -0.574295 -0.522388 
 -0.575255 -0.574295 -0.529851 
 -0.573980 -0.574295 -0.533582 
 -0.572704 -0.574295 -0.537313 
 -0.571429 -0.574295 -0.537313 
 -0.582908 -0.574295 -0.518657 
 -0.581633 -0.574295 -0.514925 
 -0.580357 -0.574295 -0.514925 
 -0.579082 -0.574295 -0.518657 
 -0.576531 -0.574295 -0.526119 
 -0.573980 -0.574295 -0.533582 
 -0.572704 -0.574295 -0.537313 
 -0.571429 -0.574295 -0.537313 
 -0.570153 -0.574295 -0.537313 
 -0.582908 -0.573713 -0.555970 
 -0.581633 -0.573713 -0.555970 
 -0.580357 -0.573713 -0.555970 
 -0.579082 -0.573713 -0.559701 
 -0.576531 -0.573713 -0.567164 
 -0.573980 -0.573713 -0.570896 
 -0.572704 -0.573713 -0.567164 
 -0.571429 -0.573713 -0.563433 
 -0.570153 -0.573713 -0.555970 
 -0.582908 -0.573132 -0.582090 
 -0.581633 -0.573132 -0.582090 
 -0.580357 -0.573132 -0.585821 
 -0.579082 -0.573132 -0.585821 
 -0.576531 -0.573132 -0.597015 
 -0.573980 -0.573132 -0.589552 
 -0.572704 -0.573132 -0.582090 
 -0.571429 -0.573132 -0.570896 
 -0.570153 -0.573132 -0.552239 
 -0.581633 -0.573132 -0.582090 
 -0.580357 -0.573132 -0.585821 
 -0.579082 -0.573132 -0.585821 
 -0.577806 -0.573132 -0.593284 
 -0.575255 -0.573132 -0.593284 
 -0.572704 -0.573132 -0.582090 
 -0.571429 -0.573132 -0.570896 
 -0.570153 -0.573132 -0.552239 
 -0.568878 -0.573132 -0.533582 
 -0.581633 -0.572550 -0.630597 
 -0.580357 -0.572550 -0.630597 
 -0.579082 -0.572550 -0.630597 
 -0.577806 -0.572550 -0.630597 
 -0.575255 -0.572550 -0.608209 
 -0.572704 -0.572550 -0.585821 
 -0.571429 -0.572550 -0.567164 
 -0.570153 -0.572550 -0.548507 
 -0.568878 -0.572550 -0.529851 
 -0.581633 -0.571969 -0.649254 
 -0.580357 -0.571969 -0.645522 
 -0.579082 -0.571969 -0.645522 
 -0.577806 -0.571969 -0.638060 
 -0.575255 -0.571969 -0.608209 
 -0.572704 -0.571969 -0.585821 
 -0.571429 -0.571969 -0.567164 
 -0.570153 -0.571969 -0.552239 
 -0.568878 -0.571969 -0.533582 
 -0.580357 -0.571969 -0.645522 
 -0.579082 -0.571969 -0.645522 
 -0.577806 -0.571969 -0.638060 
 -0.576531 -0.571969 -0.626866 
 -0.573980 -0.571969 -0.597015 
 -0.571429 -0.571969 -0.567164 
 -0.570153 -0.571969 -0.552239 
 -0.568878 -0.571969 -0.533582 
 -0.567602 -0.571969 -0.514925 
 -0.580357 -0.571387 -0.664179 
 -0.579082 -0.571387 -0.656716 
 -0.577806 -0.571387 -0.645522 
 -0.576531 -0.571387 -0.623134 
 -0.573980 -0.571387 -0.578358 
 -0.571429 -0.571387 -0.548507 
 -0.570153 -0.571387 -0.533582 
 -0.568878 -0.571387 -0.522388 
 -0.567602 -0.571387 -0.514925 
 -0.580357 -0.570805 -0.671642 
 -0.579082 -0.570805 -0.656716 
 -0.577806 -0.570805 -0.638060 
 -0.576531 -0.570805 -0.611940 
 -0.573980 -0.570805 -0.567164 
 -0.571429 -0.570805 -0.529851 
 -0.570153 -0.570805 -0.514925 
 -0.568878 -0.570805 -0.503731 
 -0.567602 -0.570805 -0.492537 
 -0.579082 -0.570805 -0.656716 
 -0.577806 -0.570805 -0.638060 
 -0.576531 -0.570805 -0.611940 
 -0.575255 -0.570805 -0.585821 
 -0.572704 -0.570805 -0.548507 
 -0.570153 -0.570805 -0.514925 
 -0.568878 -0.570805 -0.503731 
 -0.567602 -0.570805 -0.492537 
 -0.566327 -0.570805 -0.485075 
 -0.579082 -0.570224 -0.645522 
 -0.577806 -0.570224 -0.623134 
 -0.576531 -0.570224 -0.597015 
 -0.575255 -0.570224 -0.574627 
 -0.572704 -0.570224 -0.533582 
 -0.570153 -0.570224 -0.492537 
 -0.568878 -0.570224 -0.473881 
 -0.567602 -0.570224 -0.458955 
 -0.566327 -0.570224 -0.444030 
 -0.579082 -0.569642 -0.641791 
 -0.577806 -0.569642 -0.615672 
 -0.576531 -0.569642 -0.593284 
 -0.575255 -0.569642 -0.570896 
 -0.572704 -0.569642 -0.522388 
 -0.570153 -0.569642 -0.477612 
 -0.568878 -0.569642 -0.458955 
 -0.567602 -0.569642 -0.440299 
 -0.566327 -0.569642 -0.421642 
 -0.579082 -0.569061 -0.641791 
 -0.577806 -0.569061 -0.619403 
 -0.576531 -0.569061 -0.593284 
 -0.575255 -0.569061 -0.567164 
 -0.572704 -0.569061 -0.518657 
 -0.570153 -0.569061 -0.470149 
 -0.568878 -0.569061 -0.447761 
 -0.567602 -0.569061 -0.425373 
 -0.566327 -0.569061 -0.399254 
 -0.577806 -0.569061 -0.619403 
 -0.576531 -0.569061 -0.593284 
 -0.575255 -0.569061 -0.567164 
 -0.573980 -0.569061 -0.544776 
 -0.571429 -0.569061 -0.492537 
 -0.568878 -0.569061 -0.447761 
 -0.567602 -0.569061 -0.425373 
 -0.566327 -0.569061 -0.399254 
 -0.565051 -0.569061 -0.391791 
 -0.577806 -0.568479 -0.619403 
 -0.576531 -0.568479 -0.597015 
 -0.575255 -0.568479 -0.574627 
 -0.573980 -0.568479 -0.548507 
 -0.571429 -0.568479 -0.500000 
 -0.568878 -0.568479 -0.455224 
 -0.567602 -0.568479 -0.429104 
 -0.566327 -0.568479 -0.399254 
 -0.565051 -0.568479 -0.391791 
 -0.577806 -0.567898 -0.600746 
 -0.576531 -0.567898 -0.585821 
 -0.575255 -0.567898 -0.570896 
 -0.573980 -0.567898 -0.555970 
 -0.571429 -0.567898 -0.511194 
 -0.568878 -0.567898 -0.462687 
 -0.567602 -0.567898 -0.436567 
 -0.566327 -0.567898 -0.417910 
 -0.565051 -0.567898 -0.399254 
 -0.576531 -0.567898 -0.585821 
 -0.575255 -0.567898 -0.570896 
 -0.573980 -0.567898 -0.555970 
 -0.572704 -0.567898 -0.533582 
 -0.570153 -0.567898 -0.488806 
 -0.567602 -0.567898 -0.436567 
 -0.566327 -0.567898 -0.417910 
 -0.565051 -0.567898 -0.399254 
 -0.563776 -0.567898 -0.384328 
 -0.576531 -0.567316 -0.555970 
 -0.575255 -0.567316 -0.541045 
 -0.573980 -0.567316 -0.526119 
 -0.572704 -0.567316 -0.514925 
 -0.570153 -0.567316 -0.488806 
 -0.567602 -0.567316 -0.458955 
 -0.566327 -0.567316 -0.440299 
 -0.565051 -0.567316 -0.421642 
 -0.563776 -0.567316 -0.402985 
 -0.576531 -0.566735 -0.537313 
 -0.575255 -0.566735 -0.522388 
 -0.573980 -0.566735 -0.507463 
 -0.572704 -0.566735 -0.492537 
 -0.570153 -0.566735 -0.470149 
 -0.567602 -0.566735 -0.444030 
 -0.566327 -0.566735 -0.429104 
 -0.565051 -0.566735 -0.410448 
 -0.563776 -0.566735 -0.395522 
 -0.575255 -0.566735 -0.522388 
 -0.573980 -0.566735 -0.507463 
 -0.572704 -0.566735 -0.492537 
 -0.571429 -0.566735 -0.481343 
 -0.568878 -0.566735 -0.458955 
 -0.566327 -0.566735 -0.429104 
 -0.565051 -0.566735 -0.410448 
 -0.563776 -0.566735 -0.395522 
 -0.562500 -0.566735 -0.380597 
 -0.575255 -0.566153 -0.500000 
 -0.573980 -0.566153 -0.481343 
 -0.572704 -0.566153 -0.462687 
 -0.571429 -0.566153 -0.447761 
 -0.568878 -0.566153 -0.425373 
 -0.566327 -0.566153 -0.402985 
 -0.565051 -0.566153 -0.391791 
 -0.563776 -0.566153 -0.376866 
 -0.562500 -0.566153 -0.358209 
 -0.575255 -0.565571 -0.492537 
 -0.573980 -0.565571 -0.470149 
 -0.572704 -0.565571 -0.451493 
 -0.571429 -0.565571 -0.432836 
 -0.568878 -0.565571 -0.402985 
 -0.566327 -0.565571 -0.388060 
 -0.565051 -0.565571 -0.376866 
 -0.563776 -0.565571 -0.361940 
 -0.562500 -0.565571 -0.343284 
 -0.573980 -0.565571 -0.470149 
 -0.572704 -0.565571 -0.451493 
 -0.571429 -0.565571 -0.432836 
 -0.570153 -0.565571 -0.414179 
 -0.567602 -0.565571 -0.391791 
 -0.565051 -0.565571 -0.376866 
 -0.563776 -0.565571 -0.361940 
 -0.562500 -0.565571 -0.343284 
 -0.561224 -0.565571 -0.332090 
 -0.573980 -0.564990 -0.462687 
 -0.572704 -0.564990 -0.440299 
 -0.571429 -0.564990 -0.417910 
 -0.570153 -0.564990 -0.395522 
 -0.567602 -0.564990 -0.365672 
 -0.565051 -0.564990 -0.347015 
 -0.563776 -0.564990 -0.335821 
 -0.562500 -0.564990 -0.324627 
 -0.561224 -0.564990 -0.324627 
 -0.573980 -0.564408 -0.447761 
 -0.572704 -0.564408 -0.425373 
 -0.571429 -0.564408 -0.402985 
 -0.570153 -0.564408 -0.388060 
 -0.567602 -0.564408 -0.350746 
 -0.565051 -0.564408 -0.332090 
 -0.563776 -0.564408 -0.324627 
 -0.562500 -0.564408 -0.324627 
 -0.561224 -0.564408 -0.332090 
 -0.572704 -0.564408 -0.425373 
 -0.571429 -0.564408 -0.402985 
 -0.570153 -0.564408 -0.388060 
 -0.568878 -0.564408 -0.369403 
 -0.566327 -0.564408 -0.339552 
 -0.563776 -0.564408 -0.324627 
 -0.562500 -0.564408 -0.324627 
 -0.561224 -0.564408 -0.332090 
 -0.559949 -0.564408 -0.343284 
 -0.572704 -0.563827 -0.406716 
 -0.571429 -0.563827 -0.384328 
 -0.570153 -0.563827 -0.369403 
 -0.568878 -0.563827 -0.354478 
 -0.566327 -0.563827 -0.332090 
 -0.563776 -0.563827 -0.339552 
 -0.562500 -0.563827 -0.350746 
 -0.561224 -0.563827 -0.365672 
 -0.559949 -0.563827 -0.384328 
 -0.572704 -0.563245 -0.395522 
 -0.571429 -0.563245 -0.376866 
 -0.570153 -0.563245 -0.358209 
 -0.568878 -0.563245 -0.339552 
 -0.566327 -0.563245 -0.335821 
 -0.563776 -0.563245 -0.365672 
 -0.562500 -0.563245 -0.373134 
 -0.561224 -0.563245 -0.388060 
 -0.559949 -0.563245 -0.410448 
 -0.572704 -0.562664 -0.365672 
 -0.571429 -0.562664 -0.358209 
 -0.570153 -0.562664 -0.335821 
 -0.568878 -0.562664 -0.324627 
 -0.566327 -0.562664 -0.347015 
 -0.563776 -0.562664 -0.402985 
 -0.562500 -0.562664 -0.417910 
 -0.561224 -0.562664 -0.436567 
 -0.559949 -0.562664 -0.451493 
 -0.571429 -0.562664 -0.358209 
 -0.570153 -0.562664 -0.335821 
 -0.568878 -0.562664 -0.324627 
 -0.567602 -0.562664 -0.324627 
 -0.565051 -0.562664 -0.373134 
 -0.562500 -0.562664 -0.417910 
 -0.561224 -0.562664 -0.436567 
 -0.559949 -0.562664 -0.451493 
 -0.558673 -0.562664 -0.466418 
 -0.571429 -0.562082 -0.332090 
 -0.570153 -0.562082 -0.320896 
 -0.568878 -0.562082 -0.324627 
 -0.567602 -0.562082 -0.328358 
 -0.565051 -0.562082 -0.388060 
 -0.562500 -0.562082 -0.436567 
 -0.561224 -0.562082 -0.458955 
 -0.559949 -0.562082 -0.481343 
 -0.558673 -0.562082 -0.496269 
 -0.571429 -0.561500 -0.317164 
 -0.570153 -0.561500 -0.305970 
 -0.568878 -0.561500 -0.317164 
 -0.567602 -0.561500 -0.339552 
 -0.565051 -0.561500 -0.395522 
 -0.562500 -0.561500 -0.451493 
 -0.561224 -0.561500 -0.485075 
 -0.559949 -0.561500 -0.507463 
 -0.558673 -0.561500 -0.522388 
 -0.570153 -0.561500 -0.305970 
 -0.568878 -0.561500 -0.317164 
 -0.567602 -0.561500 -0.339552 
 -0.566327 -0.561500 -0.361940 
 -0.563776 -0.561500 -0.421642 
 -0.561224 -0.561500 -0.485075 
 -0.559949 -0.561500 -0.507463 
 -0.558673 -0.561500 -0.522388 
 -0.557398 -0.561500 -0.526119 
 -0.570153 -0.560919 -0.320896 
 -0.568878 -0.560919 -0.328358 
 -0.567602 -0.560919 -0.347015 
 -0.566327 -0.560919 -0.369403 
 -0.563776 -0.560919 -0.429104 
 -0.561224 -0.560919 -0.496269 
 -0.559949 -0.560919 -0.518657 
 -0.558673 -0.560919 -0.537313 
 -0.557398 -0.560919 -0.544776 
 -0.570153 -0.560337 -0.350746 
 -0.568878 -0.560337 -0.354478 
 -0.567602 -0.560337 -0.358209 
 -0.566327 -0.560337 -0.376866 
 -0.563776 -0.560337 -0.436567 
 -0.561224 -0.560337 -0.496269 
 -0.559949 -0.560337 -0.522388 
 -0.558673 -0.560337 -0.548507 
 -0.557398 -0.560337 -0.570896 
 -0.568878 -0.560337 -0.354478 
 -0.567602 -0.560337 -0.358209 
 -0.566327 -0.560337 -0.376866 
 -0.565051 -0.560337 -0.402985 
 -0.562500 -0.560337 -0.466418 
 -0.559949 -0.560337 -0.522388 
 -0.558673 -0.560337 -0.548507 
 -0.557398 -0.560337 -0.570896 
 -0.556122 -0.560337 -0.574627 
 -0.568878 -0.559756 -0.391791 
 -0.567602 -0.559756 -0.391791 
 -0.566327 -0.559756 -0.395522 
 -0.565051 -0.559756 -0.414179 
 -0.562500 -0.559756 -0.470149 
 -0.559949 -0.559756 -0.526119 
 -0.558673 -0.559756 -0.552239 
 -0.557398 -0.559756 -0.578358 
 -0.556122 -0.559756 -0.593284 
 -0.568878 -0.559174 -0.421642 
 -0.567602 -0.559174 -0.417910 
 -0.566327 -0.559174 -0.421642 
 -0.565051 -0.559174 -0.429104 
 -0.562500 -0.559174 -0.473881 
 -0.559949 -0.559174 -0.522388 
 -0.558673 -0.559174 -0.552239 
 -0.557398 -0.559174 -0.578358 
 -0.556122 -0.559174 -0.600746 
 -0.567602 -0.559174 -0.417910 
 -0.566327 -0.559174 -0.421642 
 -0.565051 -0.559174 -0.429104 
 -0.563776 -0.559174 -0.447761 
 -0.561224 -0.559174 -0.496269 
 -0.558673 -0.559174 -0.552239 
 -0.557398 -0.559174 -0.578358 
 -0.556122 -0.559174 -0.600746 
 -0.554847 -0.559174 -0.608209 
 -0.567602 -0.558593 -0.462687 
 -0.566327 -0.558593 -0.462687 
 -0.565051 -0.558593 -0.470149 
 -0.563776 -0.558593 -0.477612 
 -0.561224 -0.558593 -0.503731 
 -0.558673 -0.558593 -0.552239 
 -0.557398 -0.558593 -0.578358 
 -0.556122 -0.558593 -0.600746 
 -0.554847 -0.558593 -0.623134 
 -0.567602 -0.558011 -0.492537 
 -0.566327 -0.558011 -0.496269 
 -0.565051 -0.558011 -0.500000 
 -0.563776 -0.558011 -0.503731 
 -0.561224 -0.558011 -0.522388 
 -0.558673 -0.558011 -0.563433 
 -0.557398 -0.558011 -0.585821 
 -0.556122 -0.558011 -0.604478 
 -0.554847 -0.558011 -0.623134 
 -0.566327 -0.558011 -0.496269 
 -0.565051 -0.558011 -0.500000 
 -0.563776 -0.558011 -0.503731 
 -0.562500 -0.558011 -0.507463 
 -0.559949 -0.558011 -0.541045 
 -0.557398 -0.558011 -0.585821 
 -0.556122 -0.558011 -0.604478 
 -0.554847 -0.558011 -0.623134 
 -0.553571 -0.558011 -0.641791 
 -0.566327 -0.557429 -0.537313 
 -0.565051 -0.557429 -0.544776 
 -0.563776 -0.557429 -0.548507 
 -0.562500 -0.557429 -0.548507 
 -0.559949 -0.557429 -0.563433 
 -0.557398 -0.557429 -0.600746 
 -0.556122 -0.557429 -0.615672 
 -0.554847 -0.557429 -0.630597 
 -0.553571 -0.557429 -0.649254 
 -0.566327 -0.556848 -0.555970 
 -0.565051 -0.556848 -0.570896 
 -0.563776 -0.556848 -0.578358 
 -0.562500 -0.556848 -0.574627 
 -0.559949 -0.556848 -0.582090 
 -0.557398 -0.556848 -0.611940 
 -0.556122 -0.556848 -0.623134 
 -0.554847 -0.556848 -0.638060 
 -0.553571 -0.556848 -0.656716 
 -0.566327 -0.556266 -0.567164 
 -0.565051 -0.556266 -0.589552 
 -0.563776 -0.556266 -0.608209 
 -0.562500 -0.556266 -0.608209 
 -0.559949 -0.556266 -0.608209 
 -0.557398 -0.556266 -0.630597 
 -0.556122 -0.556266 -0.641791 
 -0.554847 -0.556266 -0.656716 
 -0.553571 -0.556266 -0.667910 
 -0.565051 -0.556266 -0.589552 
 -0.563776 -0.556266 -0.608209 
 -0.562500 -0.556266 -0.608209 
 -0.561224 -0.556266 -0.600746 
 -0.558673 -0.556266 -0.615672 
 -0.556122 -0.556266 -0.641791 
 -0.554847 -0.556266 -0.656716 
 -0.553571 -0.556266 -0.667910 
 -0.552296 -0.556266 -0.682836 
 -0.565051 -0.555685 -0.597015 
 -0.563776 -0.555685 -0.619403 
 -0.562500 -0.555685 -0.626866 
 -0.561224 -0.555685 -0.623134 
 -0.558673 -0.555685 -0.634328 
 -0.556122 -0.555685 -0.656716 
 -0.554847 -0.555685 -0.667910 
 -0.553571 -0.555685 -0.682836 
 -0.552296 -0.555685 -0.690299 
 -0.565051 -0.555103 -0.611940 
 -0.563776 -0.555103 -0.630597 
 -0.562500 -0.555103 -0.649254 
 -0.561224 -0.555103 -0.652985 
 -0.558673 -0.555103 -0.660448 
 -0.556122 -0.555103 -0.679104 
 -0.554847 -0.555103 -0.690299 
 -0.553571 -0.555103 -0.701493 
 -0.552296 -0.555103 -0.716418 
 -0.563776 -0.555103 -0.630597 
 -0.562500 -0.555103 -0.649254 
 -0.561224 -0.555103 -0.652985 
 -0.559949 -0.555103 -0.652985 
 -0.557398 -0.555103 -0.667910 
 -0.554847 -0.555103 -0.690299 
 -0.553571 -0.555103 -0.701493 
 -0.552296 -0.555103 -0.716418 
 -0.551020 -0.555103 -0.723881 
 -0.563776 -0.554522 -0.641791 
 -0.562500 -0.554522 -0.660448 
 -0.561224 -0.554522 -0.675373 
 -0.559949 -0.554522 -0.675373 
 -0.557398 -0.554522 -0.686567 
 -0.554847 -0.554522 -0.716418 
 -0.553571 -0.554522 -0.727612 
 -0.552296 -0.554522 -0.738806 
 -0.551020 -0.554522 -0.738806 
 -0.563776 -0.553940 -0.660448 
 -0.562500 -0.553940 -0.675373 
 -0.561224 -0.553940 -0.694030 
 -0.559949 -0.553940 -0.701493 
 -0.557398 -0.553940 -0.723881 
 -0.554847 -0.553940 -0.742537 
 -0.553571 -0.553940 -0.750000 
 -0.552296 -0.553940 -0.753731 
 -0.551020 -0.553940 -0.753731 
 -0.562500 -0.553940 -0.675373 
 -0.561224 -0.553940 -0.694030 
 -0.559949 -0.553940 -0.701493 
 -0.558673 -0.553940 -0.712687 
 -0.556122 -0.553940 -0.738806 
 -0.553571 -0.553940 -0.750000 
 -0.552296 -0.553940 -0.753731 
 -0.551020 -0.553940 -0.753731 
 -0.549745 -0.553940 -0.753731 
 -0.562500 -0.553359 -0.686567 
 -0.561224 -0.553359 -0.701493 
 -0.559949 -0.553359 -0.712687 
 -0.558673 -0.553359 -0.731343 
 -0.556122 -0.553359 -0.735075 
 -0.553571 -0.553359 -0.753731 
 -0.552296 -0.553359 -0.753731 
 -0.551020 -0.553359 -0.750000 
 -0.549745 -0.553359 -0.753731 
 -0.562500 -0.552777 -0.705224 
 -0.561224 -0.552777 -0.712687 
 -0.559949 -0.552777 -0.723881 
 -0.558673 -0.552777 -0.735075 
 -0.556122 -0.552777 -0.735075 
 -0.553571 -0.552777 -0.731343 
 -0.552296 -0.552777 -0.723881 
 -0.551020 -0.552777 -0.727612 
 -0.549745 -0.552777 -0.731343 
 -0.561224 -0.552777 -0.712687 
 -0.559949 -0.552777 -0.723881 
 -0.558673 -0.552777 -0.735075 
 -0.557398 -0.552777 -0.735075 
 -0.554847 -0.552777 -0.735075 
 -0.552296 -0.552777 -0.723881 
 -0.551020 -0.552777 -0.727612 
 -0.549745 -0.552777 -0.731343 
 -0.548469 -0.552777 -0.735075 
 -0.561224 -0.552195 -0.723881 
 -0.559949 -0.552195 -0.735075 
 -0.558673 -0.552195 -0.735075 
 -0.557398 -0.552195 -0.731343 
 -0.554847 -0.552195 -0.720149 
 -0.552296 -0.552195 -0.712687 
 -0.551020 -0.552195 -0.712687 
 -0.549745 -0.552195 -0.716418 
 -0.548469 -0.552195 -0.720149 
 -0.561224 -0.551614 -0.735075 
 -0.559949 -0.551614 -0.735075 
 -0.558673 -0.551614 -0.723881 
 -0.557398 -0.551614 -0.712687 
 -0.554847 -0.551614 -0.694030 
 -0.552296 -0.551614 -0.682836 
 -0.551020 -0.551614 -0.686567 
 -0.549745 -0.551614 -0.690299 
 -0.548469 -0.551614 -0.697761 
 -0.559949 -0.551614 -0.735075 
 -0.558673 -0.551614 -0.723881 
 -0.557398 -0.551614 -0.712687 
 -0.556122 -0.551614 -0.705224 
 -0.553571 -0.551614 -0.686567 
 -0.551020 -0.551614 -0.686567 
 -0.549745 -0.551614 -0.690299 
 -0.548469 -0.551614 -0.697761 
 -0.547194 -0.551614 -0.701493 
 -0.559949 -0.551032 -0.720149 
 -0.558673 -0.551032 -0.705224 
 -0.557398 -0.551032 -0.694030 
 -0.556122 -0.551032 -0.682836 
 -0.553571 -0.551032 -0.667910 
 -0.551020 -0.551032 -0.667910 
 -0.549745 -0.551032 -0.675373 
 -0.548469 -0.551032 -0.682836 
 -0.547194 -0.551032 -0.686567 
 -0.559949 -0.550451 -0.697761 
 -0.558673 -0.550451 -0.686567 
 -0.557398 -0.550451 -0.675373 
 -0.556122 -0.550451 -0.664179 
 -0.553571 -0.550451 -0.649254 
 -0.551020 -0.550451 -0.652985 
 -0.549745 -0.550451 -0.656716 
 -0.548469 -0.550451 -0.664179 
 -0.547194 -0.550451 -0.660448 
 -0.559949 -0.549869 -0.664179 
 -0.558673 -0.549869 -0.652985 
 -0.557398 -0.549869 -0.641791 
 -0.556122 -0.549869 -0.630597 
 -0.553571 -0.549869 -0.623134 
 -0.551020 -0.549869 -0.626866 
 -0.549745 -0.549869 -0.630597 
 -0.548469 -0.549869 -0.638060 
 -0.547194 -0.549869 -0.641791 
 -0.558673 -0.549869 -0.652985 
 -0.557398 -0.549869 -0.641791 
 -0.556122 -0.549869 -0.630597 
 -0.554847 -0.549869 -0.626866 
 -0.552296 -0.549869 -0.623134 
 -0.549745 -0.549869 -0.630597 
 -0.548469 -0.549869 -0.638060 
 -0.547194 -0.549869 -0.641791 
 -0.545918 -0.549869 -0.645522 
 -0.558673 -0.549288 -0.626866 
 -0.557398 -0.549288 -0.615672 
 -0.556122 -0.549288 -0.611940 
 -0.554847 -0.549288 -0.604478 
 -0.552296 -0.549288 -0.604478 
 -0.549745 -0.549288 -0.611940 
 -0.548469 -0.549288 -0.619403 
 -0.547194 -0.549288 -0.626866 
 -0.545918 -0.549288 -0.630597 
 -0.558673 -0.548706 -0.585821 
 -0.557398 -0.548706 -0.582090 
 -0.556122 -0.548706 -0.578358 
 -0.554847 -0.548706 -0.574627 
 -0.552296 -0.548706 -0.578358 
 -0.549745 -0.548706 -0.585821 
 -0.548469 -0.548706 -0.597015 
 -0.547194 -0.548706 -0.600746 
 -0.545918 -0.548706 -0.608209 
 -0.557398 -0.548706 -0.582090 
 -0.556122 -0.548706 -0.578358 
 -0.554847 -0.548706 -0.574627 
 -0.553571 -0.548706 -0.574627 
 -0.551020 -0.548706 -0.578358 
 -0.548469 -0.548706 -0.597015 
 -0.547194 -0.548706 -0.600746 
 -0.545918 -0.548706 -0.608209 
 -0.544643 -0.548706 -0.611940 
 -0.557398 -0.548124 -0.559701 
 -0.556122 -0.548124 -0.555970 
 -0.554847 -0.548124 -0.552239 
 -0.553571 -0.548124 -0.555970 
 -0.551020 -0.548124 -0.563433 
 -0.548469 -0.548124 -0.578358 
 -0.547194 -0.548124 -0.585821 
 -0.545918 -0.548124 -0.593284 
 -0.544643 -0.548124 -0.597015 
 -0.557398 -0.547543 -0.526119 
 -0.556122 -0.547543 -0.522388 
 -0.554847 -0.547543 -0.522388 
 -0.553571 -0.547543 -0.526119 
 -0.551020 -0.547543 -0.533582 
 -0.548469 -0.547543 -0.552239 
 -0.547194 -0.547543 -0.559701 
 -0.545918 -0.547543 -0.567164 
 -0.544643 -0.547543 -0.574627 
 -0.556122 -0.547543 -0.522388 
 -0.554847 -0.547543 -0.522388 
 -0.553571 -0.547543 -0.526119 
 -0.552296 -0.547543 -0.529851 
 -0.549745 -0.547543 -0.544776 
 -0.547194 -0.547543 -0.559701 
 -0.545918 -0.547543 -0.567164 
 -0.544643 -0.547543 -0.574627 
 -0.543367 -0.547543 -0.578358 
 -0.556122 -0.546961 -0.500000 
 -0.554847 -0.546961 -0.503731 
 -0.553571 -0.546961 -0.507463 
 -0.552296 -0.546961 -0.511194 
 -0.549745 -0.546961 -0.526119 
 -0.547194 -0.546961 -0.541045 
 -0.545918 -0.546961 -0.548507 
 -0.544643 -0.546961 -0.552239 
 -0.543367 -0.546961 -0.559701 
 -0.556122 -0.546380 -0.462687 
 -0.554847 -0.546380 -0.466418 
 -0.553571 -0.546380 -0.473881 
 -0.552296 -0.546380 -0.477612 
 -0.549745 -0.546380 -0.500000 
 -0.547194 -0.546380 -0.514925 
 -0.545918 -0.546380 -0.522388 
 -0.544643 -0.546380 -0.529851 
 -0.543367 -0.546380 -0.544776 
 -0.554847 -0.546380 -0.466418 
 -0.553571 -0.546380 -0.473881 
 -0.552296 -0.546380 -0.477612 
 -0.551020 -0.546380 -0.488806 
 -0.548469 -0.546380 -0.507463 
 -0.545918 -0.546380 -0.522388 
 -0.544643 -0.546380 -0.529851 
 -0.543367 -0.546380 -0.544776 
 -0.542092 -0.546380 -0.567164 
 -0.554847 -0.545798 -0.444030 
 -0.553571 -0.545798 -0.447761 
 -0.552296 -0.545798 -0.455224 
 -0.551020 -0.545798 -0.462687 
 -0.548469 -0.545798 -0.488806 
 -0.545918 -0.545798 -0.511194 
 -0.544643 -0.545798 -0.526119 
 -0.543367 -0.545798 -0.544776 
 -0.542092 -0.545798 -0.567164 
 -0.554847 -0.545217 -0.406716 
 -0.553571 -0.545217 -0.410448 
 -0.552296 -0.545217 -0.417910 
 -0.551020 -0.545217 -0.425373 
 -0.548469 -0.545217 -0.455224 
 -0.545918 -0.545217 -0.500000 
 -0.544643 -0.545217 -0.522388 
 -0.543367 -0.545217 -0.544776 
 -0.542092 -0.545217 -0.570896 
 -0.553571 -0.545217 -0.410448 
 -0.552296 -0.545217 -0.417910 
 -0.551020 -0.545217 -0.425373 
 -0.549745 -0.545217 -0.440299 
 -0.547194 -0.545217 -0.477612 
 -0.544643 -0.545217 -0.522388 
 -0.543367 -0.545217 -0.544776 
 -0.542092 -0.545217 -0.570896 
 -0.540816 -0.545217 -0.597015 
 -0.553571 -0.544635 -0.384328 
 -0.552296 -0.544635 -0.391791 
 -0.551020 -0.544635 -0.402985 
 -0.549745 -0.544635 -0.417910 
 -0.547194 -0.544635 -0.462687 
 -0.544643 -0.544635 -0.514925 
 -0.543367 -0.544635 -0.541045 
 -0.542092 -0.544635 -0.567164 
 -0.540816 -0.544635 -0.593284 
 -0.553571 -0.544054 -0.343284 
 -0.552296 -0.544054 -0.358209 
 -0.551020 -0.544054 -0.373134 
 -0.549745 -0.544054 -0.391791 
 -0.547194 -0.544054 -0.447761 
 -0.544643 -0.544054 -0.503731 
 -0.543367 -0.544054 -0.529851 
 -0.542092 -0.544054 -0.555970 
 -0.540816 -0.544054 -0.582090 
 -0.553571 -0.543472 -0.328358 
 -0.552296 -0.543472 -0.339552 
 -0.551020 -0.543472 -0.354478 
 -0.549745 -0.543472 -0.376866 
 -0.547194 -0.543472 -0.436567 
 -0.544643 -0.543472 -0.500000 
 -0.543367 -0.543472 -0.526119 
 -0.542092 -0.543472 -0.552239 
 -0.540816 -0.543472 -0.578358 
 -0.552296 -0.543472 -0.339552 
 -0.551020 -0.543472 -0.354478 
 -0.549745 -0.543472 -0.376866 
 -0.548469 -0.543472 -0.406716 
 -0.545918 -0.543472 -0.470149 
 -0.543367 -0.543472 -0.526119 
 -0.542092 -0.543472 -0.552239 
 -0.540816 -0.543472 -0.578358 
 -0.539541 -0.543472 -0.600746 
 -0.552296 -0.542890 -0.324627 
 -0.551020 -0.542890 -0.339552 
 -0.549745 -0.542890 -0.361940 
 -0.548469 -0.542890 -0.399254 
 -0.545918 -0.542890 -0.462687 
 -0.543367 -0.542890 -0.518657 
 -0.542092 -0.542890 -0.548507 
 -0.540816 -0.542890 -0.574627 
 -0.539541 -0.542890 -0.597015 
 -0.552296 -0.542309 -0.317164 
 -0.551020 -0.542309 -0.335821 
 -0.549745 -0.542309 -0.358209 
 -0.548469 -0.542309 -0.395522 
 -0.545918 -0.542309 -0.458955 
 -0.543367 -0.542309 -0.518657 
 -0.542092 -0.542309 -0.544776 
 -0.540816 -0.542309 -0.570896 
 -0.539541 -0.542309 -0.589552 
 -0.551020 -0.542309 -0.335821 
 -0.549745 -0.542309 -0.358209 
 -0.548469 -0.542309 -0.395522 
 -0.547194 -0.542309 -0.425373 
 -0.544643 -0.542309 -0.488806 
 -0.542092 -0.542309 -0.544776 
 -0.540816 -0.542309 -0.570896 
 -0.539541 -0.542309 -0.589552 
 -0.538265 -0.542309 -0.585821 
 -0.551020 -0.541727 -0.335821 
 -0.549745 -0.541727 -0.361940 
 -0.548469 -0.541727 -0.391791 
 -0.547194 -0.541727 -0.425373 
 -0.544643 -0.541727 -0.488806 
 -0.542092 -0.541727 -0.537313 
 -0.540816 -0.541727 -0.559701 
 -0.539541 -0.541727 -0.578358 
 -0.538265 -0.541727 -0.574627 
 -0.551020 -0.541146 -0.343284 
 -0.549745 -0.541146 -0.365672 
 -0.548469 -0.541146 -0.395522 
 -0.547194 -0.541146 -0.425373 
 -0.544643 -0.541146 -0.492537 
 -0.542092 -0.541146 -0.537313 
 -0.540816 -0.541146 -0.552239 
 -0.539541 -0.541146 -0.570896 
 -0.538265 -0.541146 -0.567164 
 -0.549745 -0.541146 -0.365672 
 -0.548469 -0.541146 -0.395522 
 -0.547194 -0.541146 -0.425373 
 -0.545918 -0.541146 -0.458955 
 -0.543367 -0.541146 -0.514925 
 -0.540816 -0.541146 -0.552239 
 -0.539541 -0.541146 -0.570896 
 -0.538265 -0.541146 -0.567164 
 -0.536990 -0.541146 -0.541045 
 -0.549745 -0.540564 -0.365672 
 -0.548469 -0.540564 -0.395522 
 -0.547194 -0.540564 -0.425373 
 -0.545918 -0.540564 -0.458955 
 -0.543367 -0.540564 -0.507463 
 -0.540816 -0.540564 -0.537313 
 -0.539541 -0.540564 -0.567164 
 -0.538265 -0.540564 -0.563433 
 -0.536990 -0.540564 -0.537313 
 -0.549745 -0.539983 -0.365672 
 -0.548469 -0.539983 -0.395522 
 -0.547194 -0.539983 -0.421642 
 -0.545918 -0.539983 -0.447761 
 -0.543367 -0.539983 -0.485075 
 -0.540816 -0.539983 -0.526119 
 -0.539541 -0.539983 -0.548507 
 -0.538265 -0.539983 -0.555970 
 -0.536990 -0.539983 -0.533582 
 -0.548469 -0.539983 -0.395522 
 -0.547194 -0.539983 -0.421642 
 -0.545918 -0.539983 -0.447761 
 -0.544643 -0.539983 -0.466418 
 -0.542092 -0.539983 -0.503731 
 -0.539541 -0.539983 -0.548507 
 -0.538265 -0.539983 -0.555970 
 -0.536990 -0.539983 -0.533582 
 -0.535714 -0.539983 -0.503731 
 -0.548469 -0.539401 -0.388060 
 -0.547194 -0.539401 -0.410448 
 -0.545918 -0.539401 -0.429104 
 -0.544643 -0.539401 -0.447761 
 -0.542092 -0.539401 -0.492537 
 -0.539541 -0.539401 -0.548507 
 -0.538265 -0.539401 -0.548507 
 -0.536990 -0.539401 -0.526119 
 -0.535714 -0.539401 -0.496269 
 -0.548469 -0.538819 -0.361940 
 -0.547194 -0.538819 -0.380597 
 -0.545918 -0.538819 -0.399254 
 -0.544643 -0.538819 -0.425373 
 -0.542092 -0.538819 -0.481343 
 -0.539541 -0.538819 -0.533582 
 -0.538265 -0.538819 -0.541045 
 -0.536990 -0.538819 -0.518657 
 -0.535714 -0.538819 -0.488806 
 -0.547194 -0.538238 -0.365672 
 -0.545918 -0.538238 -0.388060 
 -0.544643 -0.538238 -0.417910 
 -0.543367 -0.538238 -0.451493 
 -0.540816 -0.538238 -0.511194 
 -0.538265 -0.538238 -0.529851 
 -0.536990 -0.538238 -0.507463 
 -0.535714 -0.538238 -0.477612 
 -0.534439 -0.538238 -0.451493 
 -0.547194 -0.537656 -0.361940 
 -0.545918 -0.537656 -0.391791 
 -0.544643 -0.537656 -0.421642 
 -0.543367 -0.537656 -0.455224 
 -0.540816 -0.537656 -0.511194 
 -0.538265 -0.537656 -0.507463 
 -0.536990 -0.537656 -0.481343 
 -0.535714 -0.537656 -0.455224 
 -0.534439 -0.537656 -0.432836 
 -0.547194 -0.537075 -0.369403 
 -0.545918 -0.537075 -0.402985 
 -0.544643 -0.537075 -0.429104 
 -0.543367 -0.537075 -0.458955 
 -0.540816 -0.537075 -0.511194 
 -0.538265 -0.537075 -0.485075 
 -0.536990 -0.537075 -0.462687 
 -0.535714 -0.537075 -0.440299 
 -0.534439 -0.537075 -0.414179 
 -0.545918 -0.537075 -0.402985 
 -0.544643 -0.537075 -0.429104 
 -0.543367 -0.537075 -0.458955 
 -0.542092 -0.537075 -0.492537 
 -0.539541 -0.537075 -0.507463 
 -0.536990 -0.537075 -0.462687 
 -0.535714 -0.537075 -0.440299 
 -0.534439 -0.537075 -0.414179 
 -0.533163 -0.537075 -0.391791 
 -0.545918 -0.536493 -0.410448 
 -0.544643 -0.536493 -0.440299 
 -0.543367 -0.536493 -0.466418 
 -0.542092 -0.536493 -0.492537 
 -0.539541 -0.536493 -0.477612 
 -0.536990 -0.536493 -0.436567 
 -0.535714 -0.536493 -0.414179 
 -0.534439 -0.536493 -0.391791 
 -0.533163 -0.536493 -0.365672 
 -0.545918 -0.535912 -0.414179 
 -0.544643 -0.535912 -0.440299 
 -0.543367 -0.535912 -0.466418 
 -0.542092 -0.535912 -0.492537 
 -0.539541 -0.535912 -0.458955 
 -0.536990 -0.535912 -0.414179 
 -0.535714 -0.535912 -0.395522 
 -0.534439 -0.535912 -0.373134 
 -0.533163 -0.535912 -0.350746 
 -0.544643 -0.535912 -0.440299 
 -0.543367 -0.535912 -0.466418 
 -0.542092 -0.535912 -0.492537 
 -0.540816 -0.535912 -0.481343 
 -0.538265 -0.535912 -0.436567 
 -0.535714 -0.535912 -0.395522 
 -0.534439 -0.535912 -0.373134 
 -0.533163 -0.535912 -0.350746 
 -0.531888 -0.535912 -0.328358 
 -0.544643 -0.535330 -0.444030 
 -0.543367 -0.535330 -0.473881 
 -0.542092 -0.535330 -0.473881 
 -0.540816 -0.535330 -0.458955 
 -0.538265 -0.535330 -0.410448 
 -0.535714 -0.535330 -0.365672 
 -0.534439 -0.535330 -0.347015 
 -0.533163 -0.535330 -0.324627 
 -0.531888 -0.535330 -0.302239 
 -0.544643 -0.534748 -0.444030 
 -0.543367 -0.534748 -0.470149 
 -0.542092 -0.534748 -0.462687 
 -0.540816 -0.534748 -0.444030 
 -0.538265 -0.534748 -0.391791 
 -0.535714 -0.534748 -0.343284 
 -0.534439 -0.534748 -0.324627 
 -0.533163 -0.534748 -0.309701 
 -0.531888 -0.534748 -0.287313 
 -0.543367 -0.534748 -0.470149 
 -0.542092 -0.534748 -0.462687 
 -0.540816 -0.534748 -0.444030 
 -0.539541 -0.534748 -0.417910 
 -0.536990 -0.534748 -0.369403 
 -0.534439 -0.534748 -0.324627 
 -0.533163 -0.534748 -0.309701 
 -0.531888 -0.534748 -0.287313 
 -0.530612 -0.534748 -0.272388 
 -0.543367 -0.534167 -0.455224 
 -0.542092 -0.534167 -0.451493 
 -0.540816 -0.534167 -0.429104 
 -0.539541 -0.534167 -0.399254 
 -0.536990 -0.534167 -0.343284 
 -0.534439 -0.534167 -0.294776 
 -0.533163 -0.534167 -0.279851 
 -0.531888 -0.534167 -0.272388 
 -0.530612 -0.534167 -0.279851 
 -0.543367 -0.533585 -0.451493 
 -0.542092 -0.533585 -0.444030 
 -0.540816 -0.533585 -0.421642 
 -0.539541 -0.533585 -0.391791 
 -0.536990 -0.533585 -0.335821 
 -0.534439 -0.533585 -0.283582 
 -0.533163 -0.533585 -0.268657 
 -0.531888 -0.533585 -0.272388 
 -0.530612 -0.533585 -0.294776 
 -0.542092 -0.533585 -0.444030 
 -0.540816 -0.533585 -0.421642 
 -0.539541 -0.533585 -0.391791 
 -0.538265 -0.533585 -0.361940 
 -0.535714 -0.533585 -0.305970 
 -0.533163 -0.533585 -0.268657 
 -0.531888 -0.533585 -0.272388 
 -0.530612 -0.533585 -0.294776 
 -0.529337 -0.533585 -0.317164 
 -0.542092 -0.533004 -0.436567 
 -0.540816 -0.533004 -0.421642 
 -0.539541 -0.533004 -0.391791 
 -0.538265 -0.533004 -0.358209 
 -0.535714 -0.533004 -0.294776 
 -0.533163 -0.533004 -0.268657 
 -0.531888 -0.533004 -0.291045 
 -0.530612 -0.533004 -0.317164 
 -0.529337 -0.533004 -0.343284 
 -0.542092 -0.532422 -0.421642 
 -0.540816 -0.532422 -0.421642 
 -0.539541 -0.532422 -0.391791 
 -0.538265 -0.532422 -0.358209 
 -0.535714 -0.532422 -0.291045 
 -0.533163 -0.532422 -0.268657 
 -0.531888 -0.532422 -0.294776 
 -0.530612 -0.532422 -0.320896 
 -0.529337 -0.532422 -0.347015 
 -0.542092 -0.531841 -0.417910 
 -0.540816 -0.531841 -0.417910 
 -0.539541 -0.531841 -0.388060 
 -0.538265 -0.531841 -0.354478 
 -0.535714 -0.531841 -0.287313 
 -0.533163 -0.531841 -0.268657 
 -0.531888 -0.531841 -0.291045 
 -0.530612 -0.531841 -0.313433 
 -0.529337 -0.531841 -0.339552 
 -0.540816 -0.531841 -0.417910 
 -0.539541 -0.531841 -0.388060 
 -0.538265 -0.531841 -0.354478 
 -0.536990 -0.531841 -0.320896 
 -0.534439 -0.531841 -0.268657 
 -0.531888 -0.531841 -0.291045 
 -0.530612 -0.531841 -0.313433 
 -0.529337 -0.531841 -0.339552 
 -0.528061 -0.531841 -0.369403 
 -0.540816 -0.531259 -0.406716 
 -0.539541 -0.531259 -0.376866 
 -0.538265 -0.531259 -0.343284 
 -0.536990 -0.531259 -0.313433 
 -0.534439 -0.531259 -0.268657 
 -0.531888 -0.531259 -0.279851 
 -0.530612 -0.531259 -0.309701 
 -0.529337 -0.531259 -0.339552 
 -0.528061 -0.531259 -0.365672 
 -0.540816 -0.530678 -0.399254 
 -0.539541 -0.530678 -0.365672 
 -0.538265 -0.530678 -0.335821 
 -0.536990 -0.530678 -0.305970 
 -0.534439 -0.530678 -0.264925 
 -0.531888 -0.530678 -0.283582 
 -0.530612 -0.530678 -0.313433 
 -0.529337 -0.530678 -0.343284 
 -0.528061 -0.530678 -0.369403 
 -0.539541 -0.530678 -0.365672 
 -0.538265 -0.530678 -0.335821 
 -0.536990 -0.530678 -0.305970 
 -0.535714 -0.530678 -0.279851 
 -0.533163 -0.530678 -0.268657 
 -0.530612 -0.530678 -0.313433 
 -0.529337 -0.530678 -0.343284 
 -0.528061 -0.530678 -0.369403 
 -0.526786 -0.530678 -0.399254 
 -0.539541 -0.530096 -0.350746 
 -0.538265 -0.530096 -0.320896 
 -0.536990 -0.530096 -0.294776 
 -0.535714 -0.530096 -0.276119 
 -0.533163 -0.530096 -0.272388 
 -0.530612 -0.530096 -0.320896 
 -0.529337 -0.530096 -0.350746 
 -0.528061 -0.530096 -0.380597 
 -0.526786 -0.530096 -0.406716 
 -0.539541 -0.529514 -0.339552 
 -0.538265 -0.529514 -0.313433 
 -0.536990 -0.529514 -0.291045 
 -0.535714 -0.529514 -0.272388 
 -0.533163 -0.529514 -0.287313 
 -0.530612 -0.529514 -0.339552 
 -0.529337 -0.529514 -0.365672 
 -0.528061 -0.529514 -0.391791 
 -0.526786 -0.529514 -0.417910 
 -0.538265 -0.529514 -0.313433 
 -0.536990 -0.529514 -0.291045 
 -0.535714 -0.529514 -0.272388 
 -0.534439 -0.529514 -0.268657 
 -0.531888 -0.529514 -0.313433 
 -0.529337 -0.529514 -0.365672 
 -0.528061 -0.529514 -0.391791 
 -0.526786 -0.529514 -0.417910 
 -0.525510 -0.529514 -0.444030 
 -0.538265 -0.528933 -0.298507 
 -0.536990 -0.528933 -0.287313 
 -0.535714 -0.528933 -0.283582 
 -0.534439 -0.528933 -0.291045 
 -0.531888 -0.528933 -0.347015 
 -0.529337 -0.528933 -0.399254 
 -0.528061 -0.528933 -0.425373 
 -0.526786 -0.528933 -0.447761 
 -0.525510 -0.528933 -0.462687 
 -0.538265 -0.528351 -0.291045 
 -0.536990 -0.528351 -0.287313 
 -0.535714 -0.528351 -0.287313 
 -0.534439 -0.528351 -0.309701 
 -0.531888 -0.528351 -0.369403 
 -0.529337 -0.528351 -0.425373 
 -0.528061 -0.528351 -0.444030 
 -0.526786 -0.528351 -0.455224 
 -0.525510 -0.528351 -0.466418 
 -0.536990 -0.528351 -0.287313 
 -0.535714 -0.528351 -0.287313 
 -0.534439 -0.528351 -0.309701 
 -0.533163 -0.528351 -0.339552 
 -0.530612 -0.528351 -0.399254 
 -0.528061 -0.528351 -0.444030 
 -0.526786 -0.528351 -0.455224 
 -0.525510 -0.528351 -0.466418 
 -0.524235 -0.528351 -0.473881 
 -0.536990 -0.527770 -0.287313 
 -0.535714 -0.527770 -0.309701 
 -0.534439 -0.527770 -0.335821 
 -0.533163 -0.527770 -0.369403 
 -0.530612 -0.527770 -0.429104 
 -0.528061 -0.527770 -0.444030 
 -0.526786 -0.527770 -0.451493 
 -0.525510 -0.527770 -0.455224 
 -0.524235 -0.527770 -0.455224 
 -0.536990 -0.527188 -0.298507 
 -0.535714 -0.527188 -0.320896 
 -0.534439 -0.527188 -0.350746 
 -0.533163 -0.527188 -0.380597 
 -0.530612 -0.527188 -0.429104 
 -0.528061 -0.527188 -0.432836 
 -0.526786 -0.527188 -0.436567 
 -0.525510 -0.527188 -0.440299 
 -0.524235 -0.527188 -0.436567 
 -0.535714 -0.527188 -0.320896 
 -0.534439 -0.527188 -0.350746 
 -0.533163 -0.527188 -0.380597 
 -0.531888 -0.527188 -0.414179 
 -0.529337 -0.527188 -0.429104 
 -0.526786 -0.527188 -0.436567 
 -0.525510 -0.527188 -0.440299 
 -0.524235 -0.527188 -0.436567 
 -0.522959 -0.527188 -0.425373 
 -0.535714 -0.526607 -0.332090 
 -0.534439 -0.526607 -0.358209 
 -0.533163 -0.526607 -0.388060 
 -0.531888 -0.526607 -0.410448 
 -0.529337 -0.526607 -0.410448 
 -0.526786 -0.526607 -0.421642 
 -0.525510 -0.526607 -0.421642 
 -0.524235 -0.526607 -0.406716 
 -0.522959 -0.526607 -0.388060 
 -0.535714 -0.526025 -0.332090 
 -0.534439 -0.526025 -0.354478 
 -0.533163 -0.526025 -0.376866 
 -0.531888 -0.526025 -0.395522 
 -0.529337 -0.526025 -0.399254 
 -0.526786 -0.526025 -0.406716 
 -0.525510 -0.526025 -0.395522 
 -0.524235 -0.526025 -0.380597 
 -0.522959 -0.526025 -0.365672 
 -0.535714 -0.525443 -0.335821 
 -0.534439 -0.525443 -0.350746 
 -0.533163 -0.525443 -0.365672 
 -0.531888 -0.525443 -0.369403 
 -0.529337 -0.525443 -0.365672 
 -0.526786 -0.525443 -0.373134 
 -0.525510 -0.525443 -0.365672 
 -0.524235 -0.525443 -0.347015 
 -0.522959 -0.525443 -0.328358 
 -0.534439 -0.525443 -0.350746 
 -0.533163 -0.525443 -0.365672 
 -0.531888 -0.525443 -0.369403 
 -0.530612 -0.525443 -0.365672 
 -0.528061 -0.525443 -0.369403 
 -0.525510 -0.525443 -0.365672 
 -0.524235 -0.525443 -0.347015 
 -0.522959 -0.525443 -0.328358 
 -0.521684 -0.525443 -0.313433 
 -0.534439 -0.524862 -0.350746 
 -0.533163 -0.524862 -0.358209 
 -0.531888 -0.524862 -0.354478 
 -0.530612 -0.524862 -0.343284 
 -0.528061 -0.524862 -0.347015 
 -0.525510 -0.524862 -0.347015 
 -0.524235 -0.524862 -0.328358 
 -0.522959 -0.524862 -0.309701 
 -0.521684 -0.524862 -0.291045 
 -0.534439 -0.524280 -0.343284 
 -0.533163 -0.524280 -0.339552 
 -0.531888 -0.524280 -0.328358 
 -0.530612 -0.524280 -0.317164 
 -0.528061 -0.524280 -0.309701 
 -0.525510 -0.524280 -0.317164 
 -0.524235 -0.524280 -0.309701 
 -0.522959 -0.524280 -0.294776 
 -0.521684 -0.524280 -0.268657 
 -0.533163 -0.524280 -0.339552 
 -0.531888 -0.524280 -0.328358 
 -0.530612 -0.524280 -0.317164 
 -0.529337 -0.524280 -0.309701 
 -0.526786 -0.524280 -0.313433 
 -0.524235 -0.524280 -0.309701 
 -0.522959 -0.524280 -0.294776 
 -0.521684 -0.524280 -0.268657 
 -0.520408 -0.524280 -0.268657 
 -0.533163 -0.523699 -0.320896 
 -0.531888 -0.523699 -0.309701 
 -0.530612 -0.523699 -0.294776 
 -0.529337 -0.523699 -0.283582 
 -0.526786 -0.523699 -0.287313 
 -0.524235 -0.523699 -0.287313 
 -0.522959 -0.523699 -0.272388 
 -0.521684 -0.523699 -0.268657 
 -0.520408 -0.523699 -0.268657 
 -0.533163 -0.523117 -0.302239 
 -0.531888 -0.523117 -0.283582 
 -0.530612 -0.523117 -0.268657 
 -0.529337 -0.523117 -0.257463 
 -0.526786 -0.523117 -0.257463 
 -0.524235 -0.523117 -0.253731 
 -0.522959 -0.523117 -0.250000 
 -0.521684 -0.523117 -0.253731 
 -0.520408 -0.523117 -0.272388 
 -0.531888 -0.523117 -0.283582 
 -0.530612 -0.523117 -0.268657 
 -0.529337 -0.523117 -0.257463 
 -0.528061 -0.523117 -0.253731 
 -0.525510 -0.523117 -0.257463 
 -0.522959 -0.523117 -0.250000 
 -0.521684 -0.523117 -0.253731 
 -0.520408 -0.523117 -0.272388 
 -0.519133 -0.523117 -0.302239 
 -0.531888 -0.522536 -0.250000 
 -0.530612 -0.522536 -0.235075 
 -0.529337 -0.522536 -0.216418 
 -0.528061 -0.522536 -0.208955 
 -0.525510 -0.522536 -0.216418 
 -0.522959 -0.522536 -0.257463 
 -0.521684 -0.522536 -0.276119 
 -0.520408 -0.522536 -0.302239 
 -0.519133 -0.522536 -0.332090 
 -0.531888 -0.521954 -0.227612 
 -0.530612 -0.521954 -0.212687 
 -0.529337 -0.521954 -0.194030 
 -0.528061 -0.521954 -0.190299 
 -0.525510 -0.521954 -0.212687 
 -0.522959 -0.521954 -0.268657 
 -0.521684 -0.521954 -0.298507 
 -0.520408 -0.521954 -0.324627 
 -0.519133 -0.521954 -0.347015 
 -0.530612 -0.521954 -0.212687 
 -0.529337 -0.521954 -0.194030 
 -0.528061 -0.521954 -0.190299 
 -0.526786 -0.521954 -0.194030 
 -0.524235 -0.521954 -0.242537 
 -0.521684 -0.521954 -0.298507 
 -0.520408 -0.521954 -0.324627 
 -0.519133 -0.521954 -0.347015 
 -0.517857 -0.521954 -0.373134 
 -0.530612 -0.521372 -0.179104 
 -0.529337 -0.521372 -0.164179 
 -0.528061 -0.521372 -0.164179 
 -0.526786 -0.521372 -0.186567 
 -0.524235 -0.521372 -0.261194 
 -0.521684 -0.521372 -0.320896 
 -0.520408 -0.521372 -0.347015 
 -0.519133 -0.521372 -0.373134 
 -0.517857 -0.521372 -0.399254 
 -0.530612 -0.520791 -0.156716 
 -0.529337 -0.520791 -0.145522 
 -0.528061 -0.520791 -0.152985 
 -0.526786 -0.520791 -0.190299 
 -0.524235 -0.520791 -0.261194 
 -0.521684 -0.520791 -0.324627 
 -0.520408 -0.520791 -0.350746 
 -0.519133 -0.520791 -0.373134 
 -0.517857 -0.520791 -0.395522 
 -0.530612 -0.520209 -0.119403 
 -0.529337 -0.520209 -0.115672 
 -0.528061 -0.520209 -0.141791 
 -0.526786 -0.520209 -0.182836 
 -0.524235 -0.520209 -0.257463 
 -0.521684 -0.520209 -0.317164 
 -0.520408 -0.520209 -0.339552 
 -0.519133 -0.520209 -0.358209 
 -0.517857 -0.520209 -0.373134 
 -0.529337 -0.520209 -0.115672 
 -0.528061 -0.520209 -0.141791 
 -0.526786 -0.520209 -0.182836 
 -0.525510 -0.520209 -0.223881 
 -0.522959 -0.520209 -0.287313 
 -0.520408 -0.520209 -0.339552 
 -0.519133 -0.520209 -0.358209 
 -0.517857 -0.520209 -0.373134 
 -0.516582 -0.520209 -0.388060 
 -0.529337 -0.519628 -0.097015 
 -0.528061 -0.519628 -0.130597 
 -0.526786 -0.519628 -0.175373 
 -0.525510 -0.519628 -0.216418 
 -0.522959 -0.519628 -0.268657 
 -0.520408 -0.519628 -0.320896 
 -0.519133 -0.519628 -0.339552 
 -0.517857 -0.519628 -0.350746 
 -0.516582 -0.519628 -0.358209 
 -0.529337 -0.519046 -0.082090 
 -0.528061 -0.519046 -0.111940 
 -0.526786 -0.519046 -0.145522 
 -0.525510 -0.519046 -0.179104 
 -0.522959 -0.519046 -0.235075 
 -0.520408 -0.519046 -0.279851 
 -0.519133 -0.519046 -0.294776 
 -0.517857 -0.519046 -0.309701 
 -0.516582 -0.519046 -0.317164 
 -0.528061 -0.519046 -0.111940 
 -0.526786 -0.519046 -0.145522 
 -0.525510 -0.519046 -0.179104 
 -0.524235 -0.519046 -0.212687 
 -0.521684 -0.519046 -0.257463 
 -0.519133 -0.519046 -0.294776 
 -0.517857 -0.519046 -0.309701 
 -0.516582 -0.519046 -0.317164 
 -0.515306 -0.519046 -0.320896 
 -0.528061 -0.518465 -0.093284 
 -0.526786 -0.518465 -0.119403 
 -0.525510 -0.518465 -0.152985 
 -0.524235 -0.518465 -0.182836 
 -0.521684 -0.518465 -0.227612 
 -0.519133 -0.518465 -0.264925 
 -0.517857 -0.518465 -0.276119 
 -0.516582 -0.518465 -0.283582 
 -0.515306 -0.518465 -0.291045 
 -0.528061 -0.517883 -0.070896 
 -0.526786 -0.517883 -0.100746 
 -0.525510 -0.517883 -0.126866 
 -0.524235 -0.517883 -0.152985 
 -0.521684 -0.517883 -0.197761 
 -0.519133 -0.517883 -0.235075 
 -0.517857 -0.517883 -0.250000 
 -0.516582 -0.517883 -0.268657 
 -0.515306 -0.517883 -0.283582 
 -0.526786 -0.517883 -0.100746 
 -0.525510 -0.517883 -0.126866 
 -0.524235 -0.517883 -0.152985 
 -0.522959 -0.517883 -0.175373 
 -0.520408 -0.517883 -0.220149 
 -0.517857 -0.517883 -0.250000 
 -0.516582 -0.517883 -0.268657 
 -0.515306 -0.517883 -0.283582 
 -0.514031 -0.517883 -0.298507 
 -0.526786 -0.517302 -0.115672 
 -0.525510 -0.517302 -0.145522 
 -0.524235 -0.517302 -0.171642 
 -0.522959 -0.517302 -0.194030 
 -0.520408 -0.517302 -0.235075 
 -0.517857 -0.517302 -0.268657 
 -0.516582 -0.517302 -0.283582 
 -0.515306 -0.517302 -0.298507 
 -0.514031 -0.517302 -0.313433 
 -0.526786 -0.516720 -0.145522 
 -0.525510 -0.516720 -0.175373 
 -0.524235 -0.516720 -0.212687 
 -0.522959 -0.516720 -0.227612 
 -0.520408 -0.516720 -0.261194 
 -0.517857 -0.516720 -0.305970 
 -0.516582 -0.516720 -0.320896 
 -0.515306 -0.516720 -0.335821 
 -0.514031 -0.516720 -0.350746 
 -0.525510 -0.516720 -0.175373 
 -0.524235 -0.516720 -0.212687 
 -0.522959 -0.516720 -0.227612 
 -0.521684 -0.516720 -0.242537 
 -0.519133 -0.516720 -0.287313 
 -0.516582 -0.516720 -0.320896 
 -0.515306 -0.516720 -0.335821 
 -0.514031 -0.516720 -0.350746 
 -0.512755 -0.516720 -0.361940 
 -0.525510 -0.516138 -0.186567 
 -0.524235 -0.516138 -0.220149 
 -0.522959 -0.516138 -0.242537 
 -0.521684 -0.516138 -0.257463 
 -0.519133 -0.516138 -0.302239 
 -0.516582 -0.516138 -0.339552 
 -0.515306 -0.516138 -0.358209 
 -0.514031 -0.516138 -0.376866 
 -0.512755 -0.516138 -0.391791 
 -0.525510 -0.515557 -0.182836 
 -0.524235 -0.515557 -0.212687 
 -0.522959 -0.515557 -0.235075 
 -0.521684 -0.515557 -0.261194 
 -0.519133 -0.515557 -0.309701 
 -0.516582 -0.515557 -0.354478 
 -0.515306 -0.515557 -0.376866 
 -0.514031 -0.515557 -0.402985 
 -0.512755 -0.515557 -0.417910 
 -0.524235 -0.515557 -0.212687 
 -0.522959 -0.515557 -0.235075 
 -0.521684 -0.515557 -0.261194 
 -0.520408 -0.515557 -0.287313 
 -0.517857 -0.515557 -0.332090 
 -0.515306 -0.515557 -0.376866 
 -0.514031 -0.515557 -0.402985 
 -0.512755 -0.515557 -0.417910 
 -0.511480 -0.515557 -0.436567 
 -0.524235 -0.514975 -0.208955 
 -0.522959 -0.514975 -0.235075 
 -0.521684 -0.514975 -0.257463 
 -0.520408 -0.514975 -0.279851 
 -0.517857 -0.514975 -0.328358 
 -0.515306 -0.514975 -0.373134 
 -0.514031 -0.514975 -0.391791 
 -0.512755 -0.514975 -0.414179 
 -0.511480 -0.514975 -0.429104 
 -0.524235 -0.514394 -0.197761 
 -0.522959 -0.514394 -0.227612 
 -0.521684 -0.514394 -0.250000 
 -0.520408 -0.514394 -0.276119 
 -0.517857 -0.514394 -0.320896 
 -0.515306 -0.514394 -0.361940 
 -0.514031 -0.514394 -0.380597 
 -0.512755 -0.514394 -0.399254 
 -0.511480 -0.514394 -0.417910 
 -0.524235 -0.513812 -0.182836 
 -0.522959 -0.513812 -0.216418 
 -0.521684 -0.513812 -0.238806 
 -0.520408 -0.513812 -0.261194 
 -0.517857 -0.513812 -0.302239 
 -0.515306 -0.513812 -0.343284 
 -0.514031 -0.513812 -0.361940 
 -0.512755 -0.513812 -0.384328 
 -0.511480 -0.513812 -0.402985 
 -0.522959 -0.513812 -0.216418 
 -0.521684 -0.513812 -0.238806 
 -0.520408 -0.513812 -0.261194 
 -0.519133 -0.513812 -0.283582 
 -0.516582 -0.513812 -0.324627 
 -0.514031 -0.513812 -0.361940 
 -0.512755 -0.513812 -0.384328 
 -0.511480 -0.513812 -0.402985 
 -0.510204 -0.513812 -0.429104 
 -0.522959 -0.513231 -0.205224 
 -0.521684 -0.513231 -0.231343 
 -0.520408 -0.513231 -0.253731 
 -0.519133 -0.513231 -0.279851 
 -0.516582 -0.513231 -0.324627 
 -0.514031 -0.513231 -0.365672 
 -0.512755 -0.513231 -0.388060 
 -0.511480 -0.513231 -0.410448 
 -0.510204 -0.513231 -0.436567 
 -0.522959 -0.512649 -0.216418 
 -0.521684 -0.512649 -0.242537 
 -0.520408 -0.512649 -0.268657 
 -0.519133 -0.512649 -0.294776 
 -0.516582 -0.512649 -0.347015 
 -0.514031 -0.512649 -0.399254 
 -0.512755 -0.512649 -0.421642 
 -0.511480 -0.512649 -0.440299 
 -0.510204 -0.512649 -0.455224 
 -0.521684 -0.512649 -0.242537 
 -0.520408 -0.512649 -0.268657 
 -0.519133 -0.512649 -0.294776 
 -0.517857 -0.512649 -0.320896 
 -0.515306 -0.512649 -0.373134 
 -0.512755 -0.512649 -0.421642 
 -0.511480 -0.512649 -0.440299 
 -0.510204 -0.512649 -0.455224 
 -0.508929 -0.512649 -0.455224 
 -0.521684 -0.512067 -0.261194 
 -0.520408 -0.512067 -0.287313 
 -0.519133 -0.512067 -0.313433 
 -0.517857 -0.512067 -0.332090 
 -0.515306 -0.512067 -0.388060 
 -0.512755 -0.512067 -0.432836 
 -0.511480 -0.512067 -0.436567 
 -0.510204 -0.512067 -0.444030 
 -0.508929 -0.512067 -0.444030 
 -0.521684 -0.511486 -0.283582 
 -0.520408 -0.511486 -0.309701 
 -0.519133 -0.511486 -0.332090 
 -0.517857 -0.511486 -0.350746 
 -0.515306 -0.511486 -0.402985 
 -0.512755 -0.511486 -0.417910 
 -0.511480 -0.511486 -0.414179 
 -0.510204 -0.511486 -0.406716 
 -0.508929 -0.511486 -0.402985 
 -0.520408 -0.511486 -0.309701 
 -0.519133 -0.511486 -0.332090 
 -0.517857 -0.511486 -0.350746 
 -0.516582 -0.511486 -0.373134 
 -0.514031 -0.511486 -0.417910 
 -0.511480 -0.511486 -0.414179 
 -0.510204 -0.511486 -0.406716 
 -0.508929 -0.511486 -0.402985 
 -0.507653 -0.511486 -0.406716 
 -0.520408 -0.510904 -0.317164 
 -0.519133 -0.510904 -0.339552 
 -0.517857 -0.510904 -0.361940 
 -0.516582 -0.510904 -0.380597 
 -0.514031 -0.510904 -0.406716 
 -0.511480 -0.510904 -0.391791 
 -0.510204 -0.510904 -0.380597 
 -0.508929 -0.510904 -0.380597 
 -0.507653 -0.510904 -0.384328 
 -0.520408 -0.510323 -0.324627 
 -0.519133 -0.510323 -0.350746 
 -0.517857 -0.510323 -0.365672 
 -0.516582 -0.510323 -0.380597 
 -0.514031 -0.510323 -0.365672 
 -0.511480 -0.510323 -0.350746 
 -0.510204 -0.510323 -0.343284 
 -0.508929 -0.510323 -0.343284 
 -0.507653 -0.510323 -0.361940 
 -0.519133 -0.510323 -0.350746 
 -0.517857 -0.510323 -0.365672 
 -0.516582 -0.510323 -0.380597 
 -0.515306 -0.510323 -0.373134 
 -0.512755 -0.510323 -0.358209 
 -0.510204 -0.510323 -0.343284 
 -0.508929 -0.510323 -0.343284 
 -0.507653 -0.510323 -0.361940 
 -0.506378 -0.510323 -0.388060 
 -0.519133 -0.509741 -0.354478 
 -0.517857 -0.509741 -0.354478 
 -0.516582 -0.509741 -0.354478 
 -0.515306 -0.509741 -0.343284 
 -0.512755 -0.509741 -0.328358 
 -0.510204 -0.509741 -0.317164 
 -0.508929 -0.509741 -0.324627 
 -0.507653 -0.509741 -0.350746 
 -0.506378 -0.509741 -0.380597 
 -0.519133 -0.509160 -0.324627 
 -0.517857 -0.509160 -0.320896 
 -0.516582 -0.509160 -0.320896 
 -0.515306 -0.509160 -0.305970 
 -0.512755 -0.509160 -0.287313 
 -0.510204 -0.509160 -0.291045 
 -0.508929 -0.509160 -0.305970 
 -0.507653 -0.509160 -0.339552 
 -0.506378 -0.509160 -0.373134 
 -0.519133 -0.508578 -0.298507 
 -0.517857 -0.508578 -0.298507 
 -0.516582 -0.508578 -0.294776 
 -0.515306 -0.508578 -0.279851 
 -0.512755 -0.508578 -0.268657 
 -0.510204 -0.508578 -0.283582 
 -0.508929 -0.508578 -0.305970 
 -0.507653 -0.508578 -0.339552 
 -0.506378 -0.508578 -0.369403 
 -0.517857 -0.508578 -0.298507 
 -0.516582 -0.508578 -0.294776 
 -0.515306 -0.508578 -0.279851 
 -0.514031 -0.508578 -0.272388 
 -0.511480 -0.508578 -0.272388 
 -0.508929 -0.508578 -0.305970 
 -0.507653 -0.508578 -0.339552 
 -0.506378 -0.508578 -0.369403 
 -0.505102 -0.508578 -0.402985 
 -0.517857 -0.507997 -0.250000 
 -0.516582 -0.507997 -0.250000 
 -0.515306 -0.507997 -0.242537 
 -0.514031 -0.507997 -0.238806 
 -0.511480 -0.507997 -0.264925 
 -0.508929 -0.507997 -0.309701 
 -0.507653 -0.507997 -0.339552 
 -0.506378 -0.507997 -0.369403 
 -0.505102 -0.507997 -0.395522 
 -0.517857 -0.507415 -0.220149 
 -0.516582 -0.507415 -0.220149 
 -0.515306 -0.507415 -0.220149 
 -0.514031 -0.507415 -0.223881 
 -0.511480 -0.507415 -0.264925 
 -0.508929 -0.507415 -0.313433 
 -0.507653 -0.507415 -0.335821 
 -0.506378 -0.507415 -0.365672 
 -0.505102 -0.507415 -0.388060 
 -0.516582 -0.507415 -0.220149 
 -0.515306 -0.507415 -0.220149 
 -0.514031 -0.507415 -0.223881 
 -0.512755 -0.507415 -0.242537 
 -0.510204 -0.507415 -0.291045 
 -0.507653 -0.507415 -0.335821 
 -0.506378 -0.507415 -0.365672 
 -0.505102 -0.507415 -0.388060 
 -0.503827 -0.507415 -0.399254 
 -0.516582 -0.506833 -0.175373 
 -0.515306 -0.506833 -0.194030 
 -0.514031 -0.506833 -0.223881 
 -0.512755 -0.506833 -0.250000 
 -0.510204 -0.506833 -0.302239 
 -0.507653 -0.506833 -0.343284 
 -0.506378 -0.506833 -0.365672 
 -0.505102 -0.506833 -0.380597 
 -0.503827 -0.506833 -0.369403 
 -0.516582 -0.506252 -0.167910 
 -0.515306 -0.506252 -0.197761 
 -0.514031 -0.506252 -0.227612 
 -0.512755 -0.506252 -0.250000 
 -0.510204 -0.506252 -0.302239 
 -0.507653 -0.506252 -0.343284 
 -0.506378 -0.506252 -0.361940 
 -0.505102 -0.506252 -0.365672 
 -0.503827 -0.506252 -0.350746 
 -0.515306 -0.506252 -0.197761 
 -0.514031 -0.506252 -0.227612 
 -0.512755 -0.506252 -0.250000 
 -0.511480 -0.506252 -0.276119 
 -0.508929 -0.506252 -0.320896 
 -0.506378 -0.506252 -0.361940 
 -0.505102 -0.506252 -0.365672 
 -0.503827 -0.506252 -0.350746 
 -0.502551 -0.506252 -0.335821 
 -0.515306 -0.505670 -0.190299 
 -0.514031 -0.505670 -0.216418 
 -0.512755 -0.505670 -0.242537 
 -0.511480 -0.505670 -0.272388 
 -0.508929 -0.505670 -0.320896 
 -0.506378 -0.505670 -0.350746 
 -0.505102 -0.505670 -0.335821 
 -0.503827 -0.505670 -0.320896 
 -0.502551 -0.505670 -0.305970 
 -0.515306 -0.505089 -0.186567 
 -0.514031 -0.505089 -0.212687 
 -0.512755 -0.505089 -0.238806 
 -0.511480 -0.505089 -0.268657 
 -0.508929 -0.505089 -0.328358 
 -0.506378 -0.505089 -0.339552 
 -0.505102 -0.505089 -0.317164 
 -0.503827 -0.505089 -0.298507 
 -0.502551 -0.505089 -0.276119 
 -0.514031 -0.505089 -0.212687 
 -0.512755 -0.505089 -0.238806 
 -0.511480 -0.505089 -0.268657 
 -0.510204 -0.505089 -0.302239 
 -0.507653 -0.505089 -0.335821 
 -0.505102 -0.505089 -0.317164 
 -0.503827 -0.505089 -0.298507 
 -0.502551 -0.505089 -0.276119 
 -0.501276 -0.505089 -0.261194 
 -0.514031 -0.504507 -0.216418 
 -0.512755 -0.504507 -0.238806 
 -0.511480 -0.504507 -0.268657 
 -0.510204 -0.504507 -0.309701 
 -0.507653 -0.504507 -0.324627 
 -0.505102 -0.504507 -0.291045 
 -0.503827 -0.504507 -0.272388 
 -0.502551 -0.504507 -0.250000 
 -0.501276 -0.504507 -0.235075 
 -0.514031 -0.503926 -0.227612 
 -0.512755 -0.503926 -0.246269 
 -0.511480 -0.503926 -0.272388 
 -0.510204 -0.503926 -0.298507 
 -0.507653 -0.503926 -0.305970 
 -0.505102 -0.503926 -0.261194 
 -0.503827 -0.503926 -0.235075 
 -0.502551 -0.503926 -0.212687 
 -0.501276 -0.503926 -0.186567 
 -0.512755 -0.503926 -0.246269 
 -0.511480 -0.503926 -0.272388 
 -0.510204 -0.503926 -0.298507 
 -0.508929 -0.503926 -0.305970 
 -0.506378 -0.503926 -0.287313 
 -0.503827 -0.503926 -0.235075 
 -0.502551 -0.503926 -0.212687 
 -0.501276 -0.503926 -0.186567 
 -0.500000 -0.503926 -0.171642 
 -0.512755 -0.503344 -0.257463 
 -0.511480 -0.503344 -0.272388 
 -0.510204 -0.503344 -0.279851 
 -0.508929 -0.503344 -0.287313 
 -0.506378 -0.503344 -0.272388 
 -0.503827 -0.503344 -0.220149 
 -0.502551 -0.503344 -0.190299 
 -0.501276 -0.503344 -0.160448 
 -0.500000 -0.503344 -0.138060 
 -0.512755 -0.502762 -0.250000 
 -0.511480 -0.502762 -0.253731 
 -0.510204 -0.502762 -0.257463 
 -0.508929 -0.502762 -0.264925 
 -0.506378 -0.502762 -0.257463 
 -0.503827 -0.502762 -0.201493 
 -0.502551 -0.502762 -0.167910 
 -0.501276 -0.502762 -0.134328 
 -0.500000 -0.502762 -0.100746 
 -0.512755 -0.502181 -0.231343 
 -0.511480 -0.502181 -0.235075 
 -0.510204 -0.502181 -0.235075 
 -0.508929 -0.502181 -0.250000 
 -0.506378 -0.502181 -0.250000 
 -0.503827 -0.502181 -0.194030 
 -0.502551 -0.502181 -0.156716 
 -0.501276 -0.502181 -0.119403 
 -0.500000 -0.502181 -0.085821 
 -0.511480 -0.502181 -0.235075 
 -0.510204 -0.502181 -0.235075 
 -0.508929 -0.502181 -0.250000 
 -0.507653 -0.502181 -0.257463 
 -0.505102 -0.502181 -0.223881 
 -0.502551 -0.502181 -0.156716 
 -0.501276 -0.502181 -0.119403 
 -0.500000 -0.502181 -0.085821 
 -0.498724 -0.502181 -0.063433 
 -0.511480 -0.501599 -0.197761 
 -0.510204 -0.501599 -0.208955 
 -0.508929 -0.501599 -0.227612 
 -0.507653 -0.501599 -0.238806 
 -0.505102 -0.501599 -0.212687 
 -0.502551 -0.501599 -0.145522 
 -0.501276 -0.501599 -0.111940 
 -0.500000 -0.501599 -0.074627 
 -0.498724 -0.501599 -0.055970 
 -0.511480 -0.501018 -0.171642 
 -0.510204 -0.501018 -0.190299 
 -0.508929 -0.501018 -0.216418 
 -0.507653 -0.501018 -0.227612 
 -0.505102 -0.501018 -0.205224 
 -0.502551 -0.501018 -0.145522 
 -0.501276 -0.501018 -0.104478 
 -0.500000 -0.501018 -0.067164 
 -0.498724 -0.501018 -0.059701 
 -0.510204 -0.501018 -0.190299 
 -0.508929 -0.501018 -0.216418 
 -0.507653 -0.501018 -0.227612 
 -0.506378 -0.501018 -0.227612 
 -0.503827 -0.501018 -0.175373 
 -0.501276 -0.501018 -0.104478 
 -0.500000 -0.501018 -0.067164 
 -0.498724 -0.501018 -0.059701 
 -0.497449 -0.501018 -0.055970 
 -0.510204 -0.500436 -0.160448 
 -0.508929 -0.500436 -0.179104 
 -0.507653 -0.500436 -0.197761 
 -0.506378 -0.500436 -0.201493 
 -0.503827 -0.500436 -0.156716 
 -0.501276 -0.500436 -0.089552 
 -0.500000 -0.500436 -0.063433 
 -0.498724 -0.500436 -0.063433 
 -0.497449 -0.500436 -0.063433 
 -0.510204 -0.499855 -0.138060 
 -0.508929 -0.499855 -0.160448 
 -0.507653 -0.499855 -0.175373 
 -0.506378 -0.499855 -0.182836 
 -0.503827 -0.499855 -0.145522 
 -0.501276 -0.499855 -0.082090 
 -0.500000 -0.499855 -0.063433 
 -0.498724 -0.499855 -0.063433 
 -0.497449 -0.499855 -0.067164 
 -0.508929 -0.499855 -0.160448 
 -0.507653 -0.499855 -0.175373 
 -0.506378 -0.499855 -0.182836 
 -0.505102 -0.499855 -0.167910 
 -0.502551 -0.499855 -0.119403 
 -0.500000 -0.499855 -0.063433 
 -0.498724 -0.499855 -0.063433 
 -0.497449 -0.499855 -0.067164 
 -0.496173 -0.499855 -0.100746 
 -0.508929 -0.499273 -0.130597 
 -0.507653 -0.499273 -0.145522 
 -0.506378 -0.499273 -0.152985 
 -0.505102 -0.499273 -0.141791 
 -0.502551 -0.499273 -0.104478 
 -0.500000 -0.499273 -0.048507 
 -0.498724 -0.499273 -0.048507 
 -0.497449 -0.499273 -0.074627 
 -0.496173 -0.499273 -0.104478 
 -0.508929 -0.498691 -0.111940 
 -0.507653 -0.498691 -0.126866 
 -0.506378 -0.498691 -0.134328 
 -0.505102 -0.498691 -0.123134 
 -0.502551 -0.498691 -0.089552 
 -0.500000 -0.498691 -0.033582 
 -0.498724 -0.498691 -0.037313 
 -0.497449 -0.498691 -0.067164 
 -0.496173 -0.498691 -0.100746 
 -0.507653 -0.498691 -0.126866 
 -0.506378 -0.498691 -0.134328 
 -0.505102 -0.498691 -0.123134 
 -0.503827 -0.498691 -0.111940 
 -0.501276 -0.498691 -0.055970 
 -0.498724 -0.498691 -0.037313 
 -0.497449 -0.498691 -0.067164 
 -0.496173 -0.498691 -0.100746 
 -0.494898 -0.498691 -0.126866 
 -0.507653 -0.498110 -0.089552 
 -0.506378 -0.498110 -0.097015 
 -0.505102 -0.498110 -0.085821 
 -0.503827 -0.498110 -0.070896 
 -0.501276 -0.498110 -0.022388 
 -0.498724 -0.498110 -0.022388 
 -0.497449 -0.498110 -0.044776 
 -0.496173 -0.498110 -0.078358 
 -0.494898 -0.498110 -0.111940 
 -0.507653 -0.497528 -0.067164 
 -0.506378 -0.497528 -0.070896 
 -0.505102 -0.497528 -0.055970 
 -0.503827 -0.497528 -0.033582 
 -0.501276 -0.497528 0.000000 
 -0.498724 -0.497528 -0.011194 
 -0.497449 -0.497528 -0.033582 
 -0.496173 -0.497528 -0.067164 
 -0.494898 -0.497528 -0.097015 
 -0.507653 -0.496947 -0.041045 
 -0.506378 -0.496947 -0.044776 
 -0.505102 -0.496947 -0.029851 
 -0.503827 -0.496947 -0.007463 
 -0.501276 -0.496947 0.033582 
 -0.498724 -0.496947 0.000000 
 -0.497449 -0.496947 -0.022388 
 -0.496173 -0.496947 -0.052239 
 -0.494898 -0.496947 -0.078358 
 -0.506378 -0.496947 -0.044776 
 -0.505102 -0.496947 -0.029851 
 -0.503827 -0.496947 -0.007463 
 -0.502551 -0.496947 0.007463 
 -0.500000 -0.496947 0.022388 
 -0.497449 -0.496947 -0.022388 
 -0.496173 -0.496947 -0.052239 
 -0.494898 -0.496947 -0.078358 
 -0.493622 -0.496947 -0.100746 
 -0.506378 -0.496365 -0.003731 
 -0.505102 -0.496365 0.011194 
 -0.503827 -0.496365 0.029851 
 -0.502551 -0.496365 0.048507 
 -0.500000 -0.496365 0.029851 
 -0.497449 -0.496365 -0.022388 
 -0.496173 -0.496365 -0.048507 
 -0.494898 -0.496365 -0.074627 
 -0.493622 -0.496365 -0.097015 
 -0.506378 -0.495784 0.022388 
 -0.505102 -0.495784 0.041045 
 -0.503827 -0.495784 0.059701 
 -0.502551 -0.495784 0.070896 
 -0.500000 -0.495784 0.033582 
 -0.497449 -0.495784 -0.022388 
 -0.496173 -0.495784 -0.055970 
 -0.494898 -0.495784 -0.089552 
 -0.493622 -0.495784 -0.119403 
 -0.505102 -0.495784 0.041045 
 -0.503827 -0.495784 0.059701 
 -0.502551 -0.495784 0.070896 
 -0.501276 -0.495784 0.059701 
 -0.498724 -0.495784 0.003731 
 -0.496173 -0.495784 -0.055970 
 -0.494898 -0.495784 -0.089552 
 -0.493622 -0.495784 -0.119403 
 -0.492347 -0.495784 -0.138060 
 -0.505102 -0.495202 0.078358 
 -0.503827 -0.495202 0.097015 
 -0.502551 -0.495202 0.089552 
 -0.501276 -0.495202 0.059701 
 -0.498724 -0.495202 -0.014925 
 -0.496173 -0.495202 -0.078358 
 -0.494898 -0.495202 -0.115672 
 -0.493622 -0.495202 -0.141791 
 -0.492347 -0.495202 -0.164179 
 -0.505102 -0.494621 0.108209 
 -0.503827 -0.494621 0.111940 
 -0.502551 -0.494621 0.085821 
 -0.501276 -0.494621 0.048507 
 -0.498724 -0.494621 -0.029851 
 -0.496173 -0.494621 -0.089552 
 -0.494898 -0.494621 -0.123134 
 -0.493622 -0.494621 -0.145522 
 -0.492347 -0.494621 -0.171642 
 -0.503827 -0.494621 0.111940 
 -0.502551 -0.494621 0.085821 
 -0.501276 -0.494621 0.048507 
 -0.500000 -0.494621 0.007463 
 -0.497449 -0.494621 -0.055970 
 -0.494898 -0.494621 -0.123134 
 -0.493622 -0.494621 -0.145522 
 -0.492347 -0.494621 -0.171642 
 -0.491071 -0.494621 -0.194030 
 -0.503827 -0.494039 0.111940 
 -0.502551 -0.494039 0.070896 
 -0.501276 -0.494039 0.029851 
 -0.500000 -0.494039 -0.011194 
 -0.497449 -0.494039 -0.070896 
 -0.494898 -0.494039 -0.123134 
 -0.493622 -0.494039 -0.149254 
 -0.492347 -0.494039 -0.171642 
 -0.491071 -0.494039 -0.197761 
 -0.503827 -0.493457 0.108209 
 -0.502551 -0.493457 0.063433 
 -0.501276 -0.493457 0.022388 
 -0.500000 -0.493457 -0.014925 
 -0.497449 -0.493457 -0.070896 
 -0.494898 -0.493457 -0.123134 
 -0.493622 -0.493457 -0.145522 
 -0.492347 -0.493457 -0.164179 
 -0.491071 -0.493457 -0.186567 
 -0.502551 -0.493457 0.063433 
 -0.501276 -0.493457 0.022388 
 -0.500000 -0.493457 -0.014925 
 -0.498724 -0.493457 -0.044776 
 -0.496173 -0.493457 -0.097015 
 -0.493622 -0.493457 -0.145522 
 -0.492347 -0.493457 -0.164179 
 -0.491071 -0.493457 -0.186567 
 -0.489796 -0.493457 -0.205224 
 -0.502551 -0.492876 0.059701 
 -0.501276 -0.492876 0.026119 
 -0.500000 -0.492876 -0.007463 
 -0.498724 -0.492876 -0.037313 
 -0.496173 -0.492876 -0.085821 
 -0.493622 -0.492876 -0.123134 
 -0.492347 -0.492876 -0.141791 
 -0.491071 -0.492876 -0.160448 
 -0.489796 -0.492876 -0.179104 
 -0.502551 -0.492294 0.055970 
 -0.501276 -0.492294 0.029851 
 -0.500000 -0.492294 0.000000 
 -0.498724 -0.492294 -0.026119 
 -0.496173 -0.492294 -0.070896 
 -0.493622 -0.492294 -0.108209 
 -0.492347 -0.492294 -0.130597 
 -0.491071 -0.492294 -0.152985 
 -0.489796 -0.492294 -0.175373 
 -0.502551 -0.491713 0.059701 
 -0.501276 -0.491713 0.033582 
 -0.500000 -0.491713 0.007463 
 -0.498724 -0.491713 -0.014925 
 -0.496173 -0.491713 -0.059701 
 -0.493622 -0.491713 -0.108209 
 -0.492347 -0.491713 -0.134328 
 -0.491071 -0.491713 -0.152985 
 -0.489796 -0.491713 -0.171642 
 -0.501276 -0.491713 0.033582 
 -0.500000 -0.491713 0.007463 
 -0.498724 -0.491713 -0.014925 
 -0.497449 -0.491713 -0.037313 
 -0.494898 -0.491713 -0.085821 
 -0.492347 -0.491713 -0.134328 
 -0.491071 -0.491713 -0.152985 
 -0.489796 -0.491713 -0.171642 
 -0.488520 -0.491713 -0.190299 
 -0.501276 -0.491131 0.044776 
 -0.500000 -0.491131 0.014925 
 -0.498724 -0.491131 -0.011194 
 -0.497449 -0.491131 -0.037313 
 -0.494898 -0.491131 -0.082090 
 -0.492347 -0.491131 -0.126866 
 -0.491071 -0.491131 -0.141791 
 -0.489796 -0.491131 -0.156716 
 -0.488520 -0.491131 -0.179104 
 -0.501276 -0.490550 0.055970 
 -0.500000 -0.490550 0.029851 
 -0.498724 -0.490550 0.007463 
 -0.497449 -0.490550 -0.022388 
 -0.494898 -0.490550 -0.059701 
 -0.492347 -0.490550 -0.093284 
 -0.491071 -0.490550 -0.111940 
 -0.489796 -0.490550 -0.130597 
 -0.488520 -0.490550 -0.152985 
 -0.500000 -0.490550 0.029851 
 -0.498724 -0.490550 0.007463 
 -0.497449 -0.490550 -0.022388 
 -0.496173 -0.490550 -0.041045 
 -0.493622 -0.490550 -0.074627 
 -0.491071 -0.490550 -0.111940 
 -0.489796 -0.490550 -0.130597 
 -0.488520 -0.490550 -0.152985 
 -0.487245 -0.490550 -0.175373 
 -0.500000 -0.489968 0.041045 
 -0.498724 -0.489968 0.014925 
 -0.497449 -0.489968 -0.011194 
 -0.496173 -0.489968 -0.033582 
 -0.493622 -0.489968 -0.070896 
 -0.491071 -0.489968 -0.108209 
 -0.489796 -0.489968 -0.126866 
 -0.488520 -0.489968 -0.149254 
 -0.487245 -0.489968 -0.175373 
 -0.500000 -0.489386 0.048507 
 -0.498724 -0.489386 0.026119 
 -0.497449 -0.489386 0.000000 
 -0.496173 -0.489386 -0.022388 
 -0.493622 -0.489386 -0.078358 
 -0.491071 -0.489386 -0.115672 
 -0.489796 -0.489386 -0.138060 
 -0.488520 -0.489386 -0.160448 
 -0.487245 -0.489386 -0.182836 
 -0.498724 -0.489386 0.026119 
 -0.497449 -0.489386 0.000000 
 -0.496173 -0.489386 -0.022388 
 -0.494898 -0.489386 -0.052239 
 -0.492347 -0.489386 -0.100746 
 -0.489796 -0.489386 -0.138060 
 -0.488520 -0.489386 -0.160448 
 -0.487245 -0.489386 -0.182836 
 -0.485969 -0.489386 -0.197761 
 -0.498724 -0.488805 0.029851 
 -0.497449 -0.488805 0.007463 
 -0.496173 -0.488805 -0.018657 
 -0.494898 -0.488805 -0.052239 
 -0.492347 -0.488805 -0.108209 
 -0.489796 -0.488805 -0.149254 
 -0.488520 -0.488805 -0.167910 
 -0.487245 -0.488805 -0.182836 
 -0.485969 -0.488805 -0.194030 
 -0.498724 -0.488223 0.033582 
 -0.497449 -0.488223 0.007463 
 -0.496173 -0.488223 -0.022388 
 -0.494898 -0.488223 -0.055970 
 -0.492347 -0.488223 -0.123134 
 -0.489796 -0.488223 -0.145522 
 -0.488520 -0.488223 -0.149254 
 -0.487245 -0.488223 -0.152985 
 -0.485969 -0.488223 -0.160448 
 -0.497449 -0.488223 0.007463 
 -0.496173 -0.488223 -0.022388 
 -0.494898 -0.488223 -0.055970 
 -0.493622 -0.488223 -0.093284 
 -0.491071 -0.488223 -0.134328 
 -0.488520 -0.488223 -0.149254 
 -0.487245 -0.488223 -0.152985 
 -0.485969 -0.488223 -0.160448 
 -0.484694 -0.488223 -0.167910 
 -0.497449 -0.487642 0.000000 
 -0.496173 -0.487642 -0.029851 
 -0.494898 -0.487642 -0.063433 
 -0.493622 -0.487642 -0.089552 
 -0.491071 -0.487642 -0.115672 
 -0.488520 -0.487642 -0.119403 
 -0.487245 -0.487642 -0.126866 
 -0.485969 -0.487642 -0.134328 
 -0.484694 -0.487642 -0.149254 
 -0.497449 -0.487060 -0.007463 
 -0.496173 -0.487060 -0.037313 
 -0.494898 -0.487060 -0.052239 
 -0.493622 -0.487060 -0.063433 
 -0.491071 -0.487060 -0.085821 
 -0.488520 -0.487060 -0.097015 
 -0.487245 -0.487060 -0.104478 
 -0.485969 -0.487060 -0.115672 
 -0.484694 -0.487060 -0.138060 
 -0.496173 -0.486479 0.000000 
 -0.494898 -0.486479 -0.011194 
 -0.493622 -0.486479 -0.022388 
 -0.492347 -0.486479 -0.029851 
 -0.489796 -0.486479 -0.055970 
 -0.487245 -0.486479 -0.085821 
 -0.485969 -0.486479 -0.108209 
 -0.484694 -0.486479 -0.130597 
 -0.483418 -0.486479 -0.156716 
 -0.496173 -0.485897 0.026119 
 -0.494898 -0.485897 0.014925 
 -0.493622 -0.485897 0.003731 
 -0.492347 -0.485897 -0.007463 
 -0.489796 -0.485897 -0.041045 
 -0.487245 -0.485897 -0.085821 
 -0.485969 -0.485897 -0.108209 
 -0.484694 -0.485897 -0.134328 
 -0.483418 -0.485897 -0.156716 
 -0.496173 -0.485315 0.063433 
 -0.494898 -0.485315 0.044776 
 -0.493622 -0.485315 0.022388 
 -0.492347 -0.485315 -0.003731 
 -0.489796 -0.485315 -0.048507 
 -0.487245 -0.485315 -0.097015 
 -0.485969 -0.485315 -0.123134 
 -0.484694 -0.485315 -0.141791 
 -0.483418 -0.485315 -0.160448 
 -0.494898 -0.485315 0.044776 
 -0.493622 -0.485315 0.022388 
 -0.492347 -0.485315 -0.003731 
 -0.491071 -0.485315 -0.026119 
 -0.488520 -0.485315 -0.074627 
 -0.485969 -0.485315 -0.123134 
 -0.484694 -0.485315 -0.141791 
 -0.483418 -0.485315 -0.160448 
 -0.482143 -0.485315 -0.175373 
 -0.494898 -0.484734 0.044776 
 -0.493622 -0.484734 0.014925 
 -0.492347 -0.484734 -0.014925 
 -0.491071 -0.484734 -0.041045 
 -0.488520 -0.484734 -0.085821 
 -0.485969 -0.484734 -0.123134 
 -0.484694 -0.484734 -0.138060 
 -0.483418 -0.484734 -0.149254 
 -0.482143 -0.484734 -0.160448 
 -0.494898 -0.484152 0.063433 
 -0.493622 -0.484152 0.011194 
 -0.492347 -0.484152 -0.029851 
 -0.491071 -0.484152 -0.044776 
 -0.488520 -0.484152 -0.074627 
 -0.485969 -0.484152 -0.100746 
 -0.484694 -0.484152 -0.111940 
 -0.483418 -0.484152 -0.123134 
 -0.482143 -0.484152 -0.141791 
 -0.493622 -0.484152 0.011194 
 -0.492347 -0.484152 -0.029851 
 -0.491071 -0.484152 -0.044776 
 -0.489796 -0.484152 -0.059701 
 -0.487245 -0.484152 -0.085821 
 -0.484694 -0.484152 -0.111940 
 -0.483418 -0.484152 -0.123134 
 -0.482143 -0.484152 -0.141791 
 -0.480867 -0.484152 -0.160448 
 -0.493622 -0.483571 0.007463 
 -0.492347 -0.483571 -0.011194 
 -0.491071 -0.483571 -0.026119 
 -0.489796 -0.483571 -0.041045 
 -0.487245 -0.483571 -0.067164 
 -0.484694 -0.483571 -0.089552 
 -0.483418 -0.483571 -0.111940 
 -0.482143 -0.483571 -0.134328 
 -0.480867 -0.483571 -0.145522 
 -0.493622 -0.482989 0.037313 
 -0.492347 -0.482989 0.026119 
 -0.491071 -0.482989 0.007463 
 -0.489796 -0.482989 -0.011194 
 -0.487245 -0.482989 -0.029851 
 -0.484694 -0.482989 -0.067164 
 -0.483418 -0.482989 -0.097015 
 -0.482143 -0.482989 -0.119403 
 -0.480867 -0.482989 -0.115672 
 -0.492347 -0.482989 0.026119 
 -0.491071 -0.482989 0.007463 
 -0.489796 -0.482989 -0.011194 
 -0.488520 -0.482989 -0.022388 
 -0.485969 -0.482989 -0.044776 
 -0.483418 -0.482989 -0.097015 
 -0.482143 -0.482989 -0.119403 
 -0.480867 -0.482989 -0.115672 
 -0.479592 -0.482989 -0.100746 
 -0.492347 -0.482408 0.052239 
 -0.491071 -0.482408 0.029851 
 -0.489796 -0.482408 0.014925 
 -0.488520 -0.482408 0.003731 
 -0.485969 -0.482408 -0.026119 
 -0.483418 -0.482408 -0.078358 
 -0.482143 -0.482408 -0.093284 
 -0.480867 -0.482408 -0.093284 
 -0.479592 -0.482408 -0.078358 
 -0.492347 -0.481826 0.085821 
 -0.491071 -0.481826 0.067164 
 -0.489796 -0.481826 0.052239 
 -0.488520 -0.481826 0.037313 
 -0.485969 -0.481826 -0.011194 
 -0.483418 -0.481826 -0.044776 
 -0.482143 -0.481826 -0.055970 
 -0.480867 -0.481826 -0.052239 
 -0.479592 -0.481826 -0.044776 
 -0.491071 -0.481826 0.067164 
 -0.489796 -0.481826 0.052239 
 -0.488520 -0.481826 0.037313 
 -0.487245 -0.481826 0.014925 
 -0.484694 -0.481826 -0.029851 
 -0.482143 -0.481826 -0.055970 
 -0.480867 -0.481826 -0.052239 
 -0.479592 -0.481826 -0.044776 
 -0.478316 -0.481826 -0.033582 
 -0.491071 -0.481245 0.089552 
 -0.489796 -0.481245 0.074627 
 -0.488520 -0.481245 0.052239 
 -0.487245 -0.481245 0.026119 
 -0.484694 -0.481245 -0.007463 
 -0.482143 -0.481245 -0.029851 
 -0.480867 -0.481245 -0.026119 
 -0.479592 -0.481245 -0.014925 
 -0.478316 -0.481245 -0.003731 
 -0.491071 -0.480663 0.123134 
 -0.489796 -0.480663 0.097015 
 -0.488520 -0.480663 0.070896 
 -0.487245 -0.480663 0.052239 
 -0.484694 -0.480663 0.026119 
 -0.482143 -0.480663 0.007463 
 -0.480867 -0.480663 0.022388 
 -0.479592 -0.480663 0.037313 
 -0.478316 -0.480663 0.048507 
 -0.491071 -0.480081 0.138060 
 -0.489796 -0.480081 0.115672 
 -0.488520 -0.480081 0.093284 
 -0.487245 -0.480081 0.074627 
 -0.484694 -0.480081 0.048507 
 -0.482143 -0.480081 0.033582 
 -0.480867 -0.480081 0.052239 
 -0.479592 -0.480081 0.067164 
 -0.478316 -0.480081 0.078358 
 -0.489796 -0.480081 0.115672 
 -0.488520 -0.480081 0.093284 
 -0.487245 -0.480081 0.074627 
 -0.485969 -0.480081 0.059701 
 -0.483418 -0.480081 0.033582 
 -0.480867 -0.480081 0.052239 
 -0.479592 -0.480081 0.067164 
 -0.478316 -0.480081 0.078358 
 -0.477041 -0.480081 0.082090 
 -0.489796 -0.479500 0.145522 
 -0.488520 -0.479500 0.126866 
 -0.487245 -0.479500 0.111940 
 -0.485969 -0.479500 0.093284 
 -0.483418 -0.479500 0.070896 
 -0.480867 -0.479500 0.089552 
 -0.479592 -0.479500 0.104478 
 -0.478316 -0.479500 0.111940 
 -0.477041 -0.479500 0.119403 
 -0.489796 -0.478918 0.167910 
 -0.488520 -0.478918 0.149254 
 -0.487245 -0.478918 0.130597 
 -0.485969 -0.478918 0.119403 
 -0.483418 -0.478918 0.100746 
 -0.480867 -0.478918 0.115672 
 -0.479592 -0.478918 0.126866 
 -0.478316 -0.478918 0.138060 
 -0.477041 -0.478918 0.145522 
 -0.488520 -0.478918 0.149254 
 -0.487245 -0.478918 0.130597 
 -0.485969 -0.478918 0.119403 
 -0.484694 -0.478918 0.108209 
 -0.482143 -0.478918 0.104478 
 -0.479592 -0.478918 0.126866 
 -0.478316 -0.478918 0.138060 
 -0.477041 -0.478918 0.145522 
 -0.475765 -0.478918 0.141791 
 -0.488520 -0.478337 0.171642 
 -0.487245 -0.478337 0.152985 
 -0.485969 -0.478337 0.141791 
 -0.484694 -0.478337 0.134328 
 -0.482143 -0.478337 0.130597 
 -0.479592 -0.478337 0.152985 
 -0.478316 -0.478337 0.164179 
 -0.477041 -0.478337 0.167910 
 -0.475765 -0.478337 0.160448 
 -0.488520 -0.477755 0.205224 
 -0.487245 -0.477755 0.194030 
 -0.485969 -0.477755 0.186567 
 -0.484694 -0.477755 0.175373 
 -0.482143 -0.477755 0.167910 
 -0.479592 -0.477755 0.182836 
 -0.478316 -0.477755 0.186567 
 -0.477041 -0.477755 0.179104 
 -0.475765 -0.477755 0.156716 
 -0.487245 -0.477755 0.194030 
 -0.485969 -0.477755 0.186567 
 -0.484694 -0.477755 0.175373 
 -0.483418 -0.477755 0.164179 
 -0.480867 -0.477755 0.171642 
 -0.478316 -0.477755 0.186567 
 -0.477041 -0.477755 0.179104 
 -0.475765 -0.477755 0.156716 
 -0.474490 -0.477755 0.130597 
 -0.487245 -0.477174 0.227612 
 -0.485969 -0.477174 0.220149 
 -0.484694 -0.477174 0.212687 
 -0.483418 -0.477174 0.201493 
 -0.480867 -0.477174 0.197761 
 -0.478316 -0.477174 0.186567 
 -0.477041 -0.477174 0.171642 
 -0.475765 -0.477174 0.145522 
 -0.474490 -0.477174 0.123134 
 -0.487245 -0.476592 0.272388 
 -0.485969 -0.476592 0.264925 
 -0.484694 -0.476592 0.261194 
 -0.483418 -0.476592 0.246269 
 -0.480867 -0.476592 0.216418 
 -0.478316 -0.476592 0.164179 
 -0.477041 -0.476592 0.141791 
 -0.475765 -0.476592 0.119403 
 -0.474490 -0.476592 0.100746 
 -0.485969 -0.476592 0.264925 
 -0.484694 -0.476592 0.261194 
 -0.483418 -0.476592 0.246269 
 -0.482143 -0.476592 0.235075 
 -0.479592 -0.476592 0.190299 
 -0.477041 -0.476592 0.141791 
 -0.475765 -0.476592 0.119403 
 -0.474490 -0.476592 0.100746 
 -0.473214 -0.476592 0.078358 
 -0.485969 -0.476010 0.287313 
 -0.484694 -0.476010 0.272388 
 -0.483418 -0.476010 0.250000 
 -0.482143 -0.476010 0.223881 
 -0.479592 -0.476010 0.164179 
 -0.477041 -0.476010 0.119403 
 -0.475765 -0.476010 0.097015 
 -0.474490 -0.476010 0.078358 
 -0.473214 -0.476010 0.059701 
 -0.485969 -0.475429 0.298507 
 -0.484694 -0.475429 0.272388 
 -0.483418 -0.475429 0.238806 
 -0.482143 -0.475429 0.186567 
 -0.479592 -0.475429 0.108209 
 -0.477041 -0.475429 0.074627 
 -0.475765 -0.475429 0.055970 
 -0.474490 -0.475429 0.041045 
 -0.473214 -0.475429 0.018657 
 -0.485969 -0.474847 0.294776 
 -0.484694 -0.474847 0.264925 
 -0.483418 -0.474847 0.227612 
 -0.482143 -0.474847 0.182836 
 -0.479592 -0.474847 0.097015 
 -0.477041 -0.474847 0.041045 
 -0.475765 -0.474847 0.026119 
 -0.474490 -0.474847 0.011194 
 -0.473214 -0.474847 -0.011194 
 -0.484694 -0.474847 0.264925 
 -0.483418 -0.474847 0.227612 
 -0.482143 -0.474847 0.182836 
 -0.480867 -0.474847 0.138060 
 -0.478316 -0.474847 0.055970 
 -0.475765 -0.474847 0.026119 
 -0.474490 -0.474847 0.011194 
 -0.473214 -0.474847 -0.011194 
 -0.471939 -0.474847 -0.033582 
 -0.484694 -0.474266 0.242537 
 -0.483418 -0.474266 0.197761 
 -0.482143 -0.474266 0.152985 
 -0.480867 -0.474266 0.123134 
 -0.478316 -0.474266 0.059701 
 -0.475765 -0.474266 0.007463 
 -0.474490 -0.474266 -0.018657 
 -0.473214 -0.474266 -0.041045 
 -0.471939 -0.474266 -0.059701 
 -0.484694 -0.473684 0.205224 
 -0.483418 -0.473684 0.152985 
 -0.482143 -0.473684 0.130597 
 -0.480867 -0.473684 0.100746 
 -0.478316 -0.473684 0.041045 
 -0.475765 -0.473684 0.003731 
 -0.474490 -0.473684 -0.014925 
 -0.473214 -0.473684 -0.033582 
 -0.471939 -0.473684 -0.052239 
 -0.483418 -0.473684 0.152985 
 -0.482143 -0.473684 0.130597 
 -0.480867 -0.473684 0.100746 
 -0.479592 -0.473684 0.063433 
 -0.477041 -0.473684 0.022388 
 -0.474490 -0.473684 -0.014925 
 -0.473214 -0.473684 -0.033582 
 -0.471939 -0.473684 -0.052239 
 -0.470663 -0.473684 -0.070896 
 -0.483418 -0.473103 0.156716 
 -0.482143 -0.473103 0.134328 
 -0.480867 -0.473103 0.111940 
 -0.479592 -0.473103 0.089552 
 -0.477041 -0.473103 0.037313 
 -0.474490 -0.473103 -0.007463 
 -0.473214 -0.473103 -0.022388 
 -0.471939 -0.473103 -0.033582 
 -0.470663 -0.473103 -0.044776 
 -0.483418 -0.472521 0.186567 
 -0.482143 -0.472521 0.164179 
 -0.480867 -0.472521 0.138060 
 -0.479592 -0.472521 0.093284 
 -0.477041 -0.472521 0.029851 
 -0.474490 -0.472521 0.007463 
 -0.473214 -0.472521 0.000000 
 -0.471939 -0.472521 -0.011194 
 -0.470663 -0.472521 -0.022388 
 -0.482143 -0.472521 0.164179 
 -0.480867 -0.472521 0.138060 
 -0.479592 -0.472521 0.093284 
 -0.478316 -0.472521 0.055970 
 -0.475765 -0.472521 0.014925 
 -0.473214 -0.472521 0.000000 
 -0.471939 -0.472521 -0.011194 
 -0.470663 -0.472521 -0.022388 
 -0.469388 -0.472521 -0.033582 
 -0.482143 -0.471940 0.182836 
 -0.480867 -0.471940 0.141791 
 -0.479592 -0.471940 0.082090 
 -0.478316 -0.471940 0.059701 
 -0.475765 -0.471940 0.052239 
 -0.473214 -0.471940 0.037313 
 -0.471939 -0.471940 0.029851 
 -0.470663 -0.471940 0.018657 
 -0.469388 -0.471940 0.007463 
 -0.482143 -0.471358 0.179104 
 -0.480867 -0.471358 0.141791 
 -0.479592 -0.471358 0.111940 
 -0.478316 -0.471358 0.089552 
 -0.475765 -0.471358 0.082090 
 -0.473214 -0.471358 0.063433 
 -0.471939 -0.471358 0.055970 
 -0.470663 -0.471358 0.048507 
 -0.469388 -0.471358 0.037313 
 -0.480867 -0.471358 0.141791 
 -0.479592 -0.471358 0.111940 
 -0.478316 -0.471358 0.089552 
 -0.477041 -0.471358 0.085821 
 -0.474490 -0.471358 0.074627 
 -0.471939 -0.471358 0.055970 
 -0.470663 -0.471358 0.048507 
 -0.469388 -0.471358 0.037313 
 -0.468112 -0.471358 0.029851 
 -0.480867 -0.470776 0.149254 
 -0.479592 -0.470776 0.134328 
 -0.478316 -0.470776 0.134328 
 -0.477041 -0.470776 0.130597 
 -0.474490 -0.470776 0.119403 
 -0.471939 -0.470776 0.104478 
 -0.470663 -0.470776 0.093284 
 -0.469388 -0.470776 0.078358 
 -0.468112 -0.470776 0.055970 
 -0.480867 -0.470195 0.175373 
 -0.479592 -0.470195 0.164179 
 -0.478316 -0.470195 0.164179 
 -0.477041 -0.470195 0.156716 
 -0.474490 -0.470195 0.152985 
 -0.471939 -0.470195 0.134328 
 -0.470663 -0.470195 0.119403 
 -0.469388 -0.470195 0.093284 
 -0.468112 -0.470195 0.063433 
 -0.480867 -0.469613 0.201493 
 -0.479592 -0.469613 0.197761 
 -0.478316 -0.469613 0.197761 
 -0.477041 -0.469613 0.194030 
 -0.474490 -0.469613 0.186567 
 -0.471939 -0.469613 0.156716 
 -0.470663 -0.469613 0.134328 
 -0.469388 -0.469613 0.108209 
 -0.468112 -0.469613 0.078358 
 -0.479592 -0.469613 0.197761 
 -0.478316 -0.469613 0.197761 
 -0.477041 -0.469613 0.194030 
 -0.475765 -0.469613 0.190299 
 -0.473214 -0.469613 0.175373 
 -0.470663 -0.469613 0.134328 
 -0.469388 -0.469613 0.108209 
 -0.468112 -0.469613 0.078358 
 -0.466837 -0.469613 0.052239 
 -0.479592 -0.469032 0.246269 
 -0.478316 -0.469032 0.246269 
 -0.477041 -0.469032 0.246269 
 -0.475765 -0.469032 0.246269 
 -0.473214 -0.469032 0.212687 
 -0.470663 -0.469032 0.152985 
 -0.469388 -0.469032 0.123134 
 -0.468112 -0.469032 0.100746 
 -0.466837 -0.469032 0.078358 
 -0.479592 -0.468450 0.276119 
 -0.478316 -0.468450 0.279851 
 -0.477041 -0.468450 0.283582 
 -0.475765 -0.468450 0.279851 
 -0.473214 -0.468450 0.227612 
 -0.470663 -0.468450 0.167910 
 -0.469388 -0.468450 0.145522 
 -0.468112 -0.468450 0.123134 
 -0.466837 -0.468450 0.104478 
 -0.478316 -0.468450 0.279851 
 -0.477041 -0.468450 0.283582 
 -0.475765 -0.468450 0.279851 
 -0.474490 -0.468450 0.257463 
 -0.471939 -0.468450 0.197761 
 -0.469388 -0.468450 0.145522 
 -0.468112 -0.468450 0.123134 
 -0.466837 -0.468450 0.104478 
 -0.465561 -0.468450 0.082090 
 -0.478316 -0.467869 0.309701 
 -0.477041 -0.467869 0.309701 
 -0.475765 -0.467869 0.309701 
 -0.474490 -0.467869 0.291045 
 -0.471939 -0.467869 0.231343 
 -0.469388 -0.467869 0.190299 
 -0.468112 -0.467869 0.152985 
 -0.466837 -0.467869 0.126866 
 -0.465561 -0.467869 0.100746 
 -0.478316 -0.467287 0.302239 
 -0.477041 -0.467287 0.309701 
 -0.475765 -0.467287 0.309701 
 -0.474490 -0.467287 0.309701 
 -0.471939 -0.467287 0.261194 
 -0.469388 -0.467287 0.208955 
 -0.468112 -0.467287 0.164179 
 -0.466837 -0.467287 0.134328 
 -0.465561 -0.467287 0.108209 
 -0.477041 -0.467287 0.309701 
 -0.475765 -0.467287 0.309701 
 -0.474490 -0.467287 0.309701 
 -0.473214 -0.467287 0.283582 
 -0.470663 -0.467287 0.242537 
 -0.468112 -0.467287 0.164179 
 -0.466837 -0.467287 0.134328 
 -0.465561 -0.467287 0.108209 
 -0.464286 -0.467287 0.082090 
 -0.477041 -0.466705 0.287313 
 -0.475765 -0.466705 0.298507 
 -0.474490 -0.466705 0.309701 
 -0.473214 -0.466705 0.309701 
 -0.470663 -0.466705 0.268657 
 -0.468112 -0.466705 0.182836 
 -0.466837 -0.466705 0.145522 
 -0.465561 -0.466705 0.123134 
 -0.464286 -0.466705 0.100746 
 -0.477041 -0.466124 0.268657 
 -0.475765 -0.466124 0.287313 
 -0.474490 -0.466124 0.302239 
 -0.473214 -0.466124 0.309701 
 -0.470663 -0.466124 0.283582 
 -0.468112 -0.466124 0.208955 
 -0.466837 -0.466124 0.160448 
 -0.465561 -0.466124 0.138060 
 -0.464286 -0.466124 0.115672 
 -0.475765 -0.466124 0.287313 
 -0.474490 -0.466124 0.302239 
 -0.473214 -0.466124 0.309701 
 -0.471939 -0.466124 0.309701 
 -0.469388 -0.466124 0.253731 
 -0.466837 -0.466124 0.160448 
 -0.465561 -0.466124 0.138060 
 -0.464286 -0.466124 0.115672 
 -0.463010 -0.466124 0.093284 
 -0.475765 -0.465542 0.276119 
 -0.474490 -0.465542 0.291045 
 -0.473214 -0.465542 0.302239 
 -0.471939 -0.465542 0.305970 
 -0.469388 -0.465542 0.272388 
 -0.466837 -0.465542 0.201493 
 -0.465561 -0.465542 0.167910 
 -0.464286 -0.465542 0.145522 
 -0.463010 -0.465542 0.126866 
 -0.475765 -0.464961 0.264925 
 -0.474490 -0.464961 0.279851 
 -0.473214 -0.464961 0.283582 
 -0.471939 -0.464961 0.279851 
 -0.469388 -0.464961 0.268657 
 -0.466837 -0.464961 0.220149 
 -0.465561 -0.464961 0.190299 
 -0.464286 -0.464961 0.167910 
 -0.463010 -0.464961 0.145522 
 -0.475765 -0.464379 0.250000 
 -0.474490 -0.464379 0.261194 
 -0.473214 -0.464379 0.264925 
 -0.471939 -0.464379 0.257463 
 -0.469388 -0.464379 0.242537 
 -0.466837 -0.464379 0.235075 
 -0.465561 -0.464379 0.227612 
 -0.464286 -0.464379 0.205224 
 -0.463010 -0.464379 0.182836 
 -0.474490 -0.464379 0.261194 
 -0.473214 -0.464379 0.264925 
 -0.471939 -0.464379 0.257463 
 -0.470663 -0.464379 0.242537 
 -0.468112 -0.464379 0.246269 
 -0.465561 -0.464379 0.227612 
 -0.464286 -0.464379 0.205224 
 -0.463010 -0.464379 0.182836 
 -0.461735 -0.464379 0.160448 
 -0.474490 -0.463798 0.242537 
 -0.473214 -0.463798 0.246269 
 -0.471939 -0.463798 0.235075 
 -0.470663 -0.463798 0.223881 
 -0.468112 -0.463798 0.227612 
 -0.465561 -0.463798 0.235075 
 -0.464286 -0.463798 0.231343 
 -0.463010 -0.463798 0.216418 
 -0.461735 -0.463798 0.194030 
 -0.474490 -0.463216 0.212687 
 -0.473214 -0.463216 0.208955 
 -0.471939 -0.463216 0.201493 
 -0.470663 -0.463216 0.190299 
 -0.468112 -0.463216 0.194030 
 -0.465561 -0.463216 0.216418 
 -0.464286 -0.463216 0.231343 
 -0.463010 -0.463216 0.238806 
 -0.461735 -0.463216 0.235075 
 -0.473214 -0.463216 0.208955 
 -0.471939 -0.463216 0.201493 
 -0.470663 -0.463216 0.190299 
 -0.469388 -0.463216 0.190299 
 -0.466837 -0.463216 0.205224 
 -0.464286 -0.463216 0.231343 
 -0.463010 -0.463216 0.238806 
 -0.461735 -0.463216 0.235075 
 -0.460459 -0.463216 0.235075 
 -0.473214 -0.462634 0.186567 
 -0.471939 -0.462634 0.179104 
 -0.470663 -0.462634 0.167910 
 -0.469388 -0.462634 0.167910 
 -0.466837 -0.462634 0.186567 
 -0.464286 -0.462634 0.208955 
 -0.463010 -0.462634 0.220149 
 -0.461735 -0.462634 0.231343 
 -0.460459 -0.462634 0.238806 
 -0.473214 -0.462053 0.152985 
 -0.471939 -0.462053 0.141791 
 -0.470663 -0.462053 0.130597 
 -0.469388 -0.462053 0.130597 
 -0.466837 -0.462053 0.149254 
 -0.464286 -0.462053 0.167910 
 -0.463010 -0.462053 0.179104 
 -0.461735 -0.462053 0.197761 
 -0.460459 -0.462053 0.216418 
 -0.471939 -0.462053 0.141791 
 -0.470663 -0.462053 0.130597 
 -0.469388 -0.462053 0.130597 
 -0.468112 -0.462053 0.141791 
 -0.465561 -0.462053 0.156716 
 -0.463010 -0.462053 0.179104 
 -0.461735 -0.462053 0.197761 
 -0.460459 -0.462053 0.216418 
 -0.459184 -0.462053 0.231343 
 -0.471939 -0.461471 0.115672 
 -0.470663 -0.461471 0.104478 
 -0.469388 -0.461471 0.108209 
 -0.468112 -0.461471 0.115672 
 -0.465561 -0.461471 0.134328 
 -0.463010 -0.461471 0.160448 
 -0.461735 -0.461471 0.182836 
 -0.460459 -0.461471 0.205224 
 -0.459184 -0.461471 0.231343 
 -0.471939 -0.460890 0.085821 
 -0.470663 -0.460890 0.078358 
 -0.469388 -0.460890 0.082090 
 -0.468112 -0.460890 0.093284 
 -0.465561 -0.460890 0.115672 
 -0.463010 -0.460890 0.160448 
 -0.461735 -0.460890 0.186567 
 -0.460459 -0.460890 0.208955 
 -0.459184 -0.460890 0.235075 
 -0.470663 -0.460890 0.078358 
 -0.469388 -0.460890 0.082090 
 -0.468112 -0.460890 0.093284 
 -0.466837 -0.460890 0.100746 
 -0.464286 -0.460890 0.138060 
 -0.461735 -0.460890 0.186567 
 -0.460459 -0.460890 0.208955 
 -0.459184 -0.460890 0.235075 
 -0.457908 -0.460890 0.253731 
 -0.470663 -0.460308 0.048507 
 -0.469388 -0.460308 0.055970 
 -0.468112 -0.460308 0.070896 
 -0.466837 -0.460308 0.097015 
 -0.464286 -0.460308 0.141791 
 -0.461735 -0.460308 0.190299 
 -0.460459 -0.460308 0.208955 
 -0.459184 -0.460308 0.220149 
 -0.457908 -0.460308 0.227612 
 -0.470663 -0.459727 0.033582 
 -0.469388 -0.459727 0.055970 
 -0.468112 -0.459727 0.078358 
 -0.466837 -0.459727 0.100746 
 -0.464286 -0.459727 0.149254 
 -0.461735 -0.459727 0.182836 
 -0.460459 -0.459727 0.186567 
 -0.459184 -0.459727 0.190299 
 -0.457908 -0.459727 0.197761 
 -0.470663 -0.459145 0.029851 
 -0.469388 -0.459145 0.059701 
 -0.468112 -0.459145 0.082090 
 -0.466837 -0.459145 0.104478 
 -0.464286 -0.459145 0.130597 
 -0.461735 -0.459145 0.134328 
 -0.460459 -0.459145 0.138060 
 -0.459184 -0.459145 0.141791 
 -0.457908 -0.459145 0.152985 
 -0.469388 -0.459145 0.059701 
 -0.468112 -0.459145 0.082090 
 -0.466837 -0.459145 0.104478 
 -0.465561 -0.459145 0.123134 
 -0.463010 -0.459145 0.134328 
 -0.460459 -0.459145 0.138060 
 -0.459184 -0.459145 0.141791 
 -0.457908 -0.459145 0.152985 
 -0.456633 -0.459145 0.164179 
 -0.469388 -0.458564 0.059701 
 -0.468112 -0.458564 0.082090 
 -0.466837 -0.458564 0.100746 
 -0.465561 -0.458564 0.111940 
 -0.463010 -0.458564 0.104478 
 -0.460459 -0.458564 0.108209 
 -0.459184 -0.458564 0.115672 
 -0.457908 -0.458564 0.126866 
 -0.456633 -0.458564 0.141791 
 -0.469388 -0.457982 0.055970 
 -0.468112 -0.457982 0.074627 
 -0.466837 -0.457982 0.082090 
 -0.465561 -0.457982 0.078358 
 -0.463010 -0.457982 0.063433 
 -0.460459 -0.457982 0.067164 
 -0.459184 -0.457982 0.082090 
 -0.457908 -0.457982 0.108209 
 -0.456633 -0.457982 0.130597 
 -0.468112 -0.457982 0.074627 
 -0.466837 -0.457982 0.082090 
 -0.465561 -0.457982 0.078358 
 -0.464286 -0.457982 0.070896 
 -0.461735 -0.457982 0.059701 
 -0.459184 -0.457982 0.082090 
 -0.457908 -0.457982 0.108209 
 -0.456633 -0.457982 0.130597 
 -0.455357 -0.457982 0.156716 
 -0.468112 -0.457400 0.059701 
 -0.466837 -0.457400 0.055970 
 -0.465561 -0.457400 0.052239 
 -0.464286 -0.457400 0.048507 
 -0.461735 -0.457400 0.041045 
 -0.459184 -0.457400 0.078358 
 -0.457908 -0.457400 0.104478 
 -0.456633 -0.457400 0.134328 
 -0.455357 -0.457400 0.160448 
 -0.468112 -0.456819 0.014925 
 -0.466837 -0.456819 0.003731 
 -0.465561 -0.456819 0.011194 
 -0.464286 -0.456819 0.011194 
 -0.461735 -0.456819 0.029851 
 -0.459184 -0.456819 0.082090 
 -0.457908 -0.456819 0.111940 
 -0.456633 -0.456819 0.141791 
 -0.455357 -0.456819 0.171642 
 -0.466837 -0.456819 0.003731 
 -0.465561 -0.456819 0.011194 
 -0.464286 -0.456819 0.011194 
 -0.463010 -0.456819 0.011194 
 -0.460459 -0.456819 0.052239 
 -0.457908 -0.456819 0.111940 
 -0.456633 -0.456819 0.141791 
 -0.455357 -0.456819 0.171642 
 -0.454082 -0.456819 0.197761 
 -0.466837 -0.456237 -0.029851 
 -0.465561 -0.456237 -0.018657 
 -0.464286 -0.456237 -0.011194 
 -0.463010 -0.456237 0.007463 
 -0.460459 -0.456237 0.055970 
 -0.457908 -0.456237 0.115672 
 -0.456633 -0.456237 0.149254 
 -0.455357 -0.456237 0.175373 
 -0.454082 -0.456237 0.194030 
 -0.466837 -0.455656 -0.044776 
 -0.465561 -0.455656 -0.041045 
 -0.464286 -0.455656 -0.026119 
 -0.463010 -0.455656 0.000000 
 -0.460459 -0.455656 0.055970 
 -0.457908 -0.455656 0.115672 
 -0.456633 -0.455656 0.145522 
 -0.455357 -0.455656 0.164179 
 -0.454082 -0.455656 0.164179 
 -0.465561 -0.455656 -0.041045 
 -0.464286 -0.455656 -0.026119 
 -0.463010 -0.455656 0.000000 
 -0.461735 -0.455656 0.029851 
 -0.459184 -0.455656 0.085821 
 -0.456633 -0.455656 0.145522 
 -0.455357 -0.455656 0.164179 
 -0.454082 -0.455656 0.164179 
 -0.452806 -0.455656 0.152985 
 -0.465561 -0.455074 -0.048507 
 -0.464286 -0.455074 -0.029851 
 -0.463010 -0.455074 -0.003731 
 -0.461735 -0.455074 0.029851 
 -0.459184 -0.455074 0.085821 
 -0.456633 -0.455074 0.138060 
 -0.455357 -0.455074 0.138060 
 -0.454082 -0.455074 0.134328 
 -0.452806 -0.455074 0.126866 
 -0.465561 -0.454493 -0.052239 
 -0.464286 -0.454493 -0.026119 
 -0.463010 -0.454493 0.003731 
 -0.461735 -0.454493 0.033582 
 -0.459184 -0.454493 0.085821 
 -0.456633 -0.454493 0.104478 
 -0.455357 -0.454493 0.100746 
 -0.454082 -0.454493 0.093284 
 -0.452806 -0.454493 0.082090 
 -0.465561 -0.453911 -0.044776 
 -0.464286 -0.453911 -0.018657 
 -0.463010 -0.453911 0.011194 
 -0.461735 -0.453911 0.037313 
 -0.459184 -0.453911 0.074627 
 -0.456633 -0.453911 0.078358 
 -0.455357 -0.453911 0.074627 
 -0.454082 -0.453911 0.067164 
 -0.452806 -0.453911 0.059701 
 -0.464286 -0.453911 -0.018657 
 -0.463010 -0.453911 0.011194 
 -0.461735 -0.453911 0.037313 
 -0.460459 -0.453911 0.055970 
 -0.457908 -0.453911 0.078358 
 -0.455357 -0.453911 0.074627 
 -0.454082 -0.453911 0.067164 
 -0.452806 -0.453911 0.059701 
 -0.451531 -0.453911 0.055970 
 -0.464286 -0.453329 -0.003731 
 -0.463010 -0.453329 0.014925 
 -0.461735 -0.453329 0.026119 
 -0.460459 -0.453329 0.033582 
 -0.457908 -0.453329 0.037313 
 -0.455357 -0.453329 0.037313 
 -0.454082 -0.453329 0.033582 
 -0.452806 -0.453329 0.026119 
 -0.451531 -0.453329 0.037313 
 -0.464286 -0.452748 -0.011194 
 -0.463010 -0.452748 0.000000 
 -0.461735 -0.452748 0.003731 
 -0.460459 -0.452748 0.003731 
 -0.457908 -0.452748 0.007463 
 -0.455357 -0.452748 0.011194 
 -0.454082 -0.452748 0.011194 
 -0.452806 -0.452748 0.011194 
 -0.451531 -0.452748 0.022388 
 -0.463010 -0.452748 0.000000 
 -0.461735 -0.452748 0.003731 
 -0.460459 -0.452748 0.003731 
 -0.459184 -0.452748 0.007463 
 -0.456633 -0.452748 0.007463 
 -0.454082 -0.452748 0.011194 
 -0.452806 -0.452748 0.011194 
 -0.451531 -0.452748 0.022388 
 -0.450255 -0.452748 0.029851 
 -0.463010 -0.452166 -0.026119 
 -0.461735 -0.452166 -0.026119 
 -0.460459 -0.452166 -0.037313 
 -0.459184 -0.452166 -0.037313 
 -0.456633 -0.452166 -0.033582 
 -0.454082 -0.452166 -0.022388 
 -0.452806 -0.452166 -0.007463 
 -0.451531 -0.452166 0.003731 
 -0.450255 -0.452166 0.022388 
 -0.463010 -0.451585 -0.074627 
 -0.461735 -0.451585 -0.070896 
 -0.460459 -0.451585 -0.067164 
 -0.459184 -0.451585 -0.063433 
 -0.456633 -0.451585 -0.052239 
 -0.454082 -0.451585 -0.026119 
 -0.452806 -0.451585 0.000000 
 -0.451531 -0.451585 0.018657 
 -0.450255 -0.451585 0.037313 
 -0.461735 -0.451585 -0.070896 
 -0.460459 -0.451585 -0.067164 
 -0.459184 -0.451585 -0.063433 
 -0.457908 -0.451585 -0.059701 
 -0.455357 -0.451585 -0.044776 
 -0.452806 -0.451585 0.000000 
 -0.451531 -0.451585 0.018657 
 -0.450255 -0.451585 0.037313 
 -0.448980 -0.451585 0.052239 
 -0.461735 -0.451003 -0.100746 
 -0.460459 -0.451003 -0.093284 
 -0.459184 -0.451003 -0.082090 
 -0.457908 -0.451003 -0.070896 
 -0.455357 -0.451003 -0.037313 
 -0.452806 -0.451003 0.014925 
 -0.451531 -0.451003 0.037313 
 -0.450255 -0.451003 0.052239 
 -0.448980 -0.451003 0.067164 
 -0.461735 -0.450422 -0.104478 
 -0.460459 -0.450422 -0.089552 
 -0.459184 -0.450422 -0.070896 
 -0.457908 -0.450422 -0.055970 
 -0.455357 -0.450422 -0.014925 
 -0.452806 -0.450422 0.041045 
 -0.451531 -0.450422 0.063433 
 -0.450255 -0.450422 0.082090 
 -0.448980 -0.450422 0.104478 
 -0.460459 -0.450422 -0.089552 
 -0.459184 -0.450422 -0.070896 
 -0.457908 -0.450422 -0.055970 
 -0.456633 -0.450422 -0.037313 
 -0.454082 -0.450422 0.014925 
 -0.451531 -0.450422 0.063433 
 -0.450255 -0.450422 0.082090 
 -0.448980 -0.450422 0.104478 
 -0.447704 -0.450422 0.119403 
 -0.460459 -0.449840 -0.070896 
 -0.459184 -0.449840 -0.055970 
 -0.457908 -0.449840 -0.041045 
 -0.456633 -0.449840 -0.022388 
 -0.454082 -0.449840 0.033582 
 -0.451531 -0.449840 0.085821 
 -0.450255 -0.449840 0.104478 
 -0.448980 -0.449840 0.104478 
 -0.447704 -0.449840 0.108209 
 -0.460459 -0.449259 -0.037313 
 -0.459184 -0.449259 -0.018657 
 -0.457908 -0.449259 0.000000 
 -0.456633 -0.449259 0.018657 
 -0.454082 -0.449259 0.059701 
 -0.451531 -0.449259 0.082090 
 -0.450255 -0.449259 0.074627 
 -0.448980 -0.449259 0.070896 
 -0.447704 -0.449259 0.067164 
 -0.460459 -0.448677 -0.014925 
 -0.459184 -0.448677 0.003731 
 -0.457908 -0.448677 0.018657 
 -0.456633 -0.448677 0.037313 
 -0.454082 -0.448677 0.059701 
 -0.451531 -0.448677 0.052239 
 -0.450255 -0.448677 0.048507 
 -0.448980 -0.448677 0.041045 
 -0.447704 -0.448677 0.037313 
 -0.459184 -0.448677 0.003731 
 -0.457908 -0.448677 0.018657 
 -0.456633 -0.448677 0.037313 
 -0.455357 -0.448677 0.048507 
 -0.452806 -0.448677 0.059701 
 -0.450255 -0.448677 0.048507 
 -0.448980 -0.448677 0.041045 
 -0.447704 -0.448677 0.037313 
 -0.446429 -0.448677 0.033582 
 -0.459184 -0.448095 0.011194 
 -0.457908 -0.448095 0.018657 
 -0.456633 -0.448095 0.026119 
 -0.455357 -0.448095 0.022388 
 -0.452806 -0.448095 0.014925 
 -0.450255 -0.448095 0.000000 
 -0.448980 -0.448095 -0.003731 
 -0.447704 -0.448095 -0.011194 
 -0.446429 -0.448095 -0.014925 
 -0.459184 -0.447514 -0.003731 
 -0.457908 -0.447514 0.000000 
 -0.456633 -0.447514 0.000000 
 -0.455357 -0.447514 -0.003731 
 -0.452806 -0.447514 -0.014925 
 -0.450255 -0.447514 -0.029851 
 -0.448980 -0.447514 -0.033582 
 -0.447704 -0.447514 -0.041045 
 -0.446429 -0.447514 -0.041045 
 -0.457908 -0.447514 0.000000 
 -0.456633 -0.447514 0.000000 
 -0.455357 -0.447514 -0.003731 
 -0.454082 -0.447514 -0.011194 
 -0.451531 -0.447514 -0.022388 
 -0.448980 -0.447514 -0.033582 
 -0.447704 -0.447514 -0.041045 
 -0.446429 -0.447514 -0.041045 
 -0.445153 -0.447514 -0.041045 
 -0.457908 -0.446932 -0.037313 
 -0.456633 -0.446932 -0.041045 
 -0.455357 -0.446932 -0.048507 
 -0.454082 -0.446932 -0.055970 
 -0.451531 -0.446932 -0.067164 
 -0.448980 -0.446932 -0.070896 
 -0.447704 -0.446932 -0.070896 
 -0.446429 -0.446932 -0.063433 
 -0.445153 -0.446932 -0.052239 
 -0.457908 -0.446351 -0.067164 
 -0.456633 -0.446351 -0.070896 
 -0.455357 -0.446351 -0.078358 
 -0.454082 -0.446351 -0.085821 
 -0.451531 -0.446351 -0.097015 
 -0.448980 -0.446351 -0.085821 
 -0.447704 -0.446351 -0.078358 
 -0.446429 -0.446351 -0.059701 
 -0.445153 -0.446351 -0.037313 
 -0.456633 -0.446351 -0.070896 
 -0.455357 -0.446351 -0.078358 
 -0.454082 -0.446351 -0.085821 
 -0.452806 -0.446351 -0.093284 
 -0.450255 -0.446351 -0.093284 
 -0.447704 -0.446351 -0.078358 
 -0.446429 -0.446351 -0.059701 
 -0.445153 -0.446351 -0.037313 
 -0.443878 -0.446351 -0.014925 
 -0.456633 -0.445769 -0.119403 
 -0.455357 -0.445769 -0.123134 
 -0.454082 -0.445769 -0.130597 
 -0.452806 -0.445769 -0.130597 
 -0.450255 -0.445769 -0.097015 
 -0.447704 -0.445769 -0.055970 
 -0.446429 -0.445769 -0.033582 
 -0.445153 -0.445769 -0.011194 
 -0.443878 -0.445769 0.011194 
 -0.456633 -0.445188 -0.145522 
 -0.455357 -0.445188 -0.145522 
 -0.454082 -0.445188 -0.141791 
 -0.452806 -0.445188 -0.126866 
 -0.450255 -0.445188 -0.085821 
 -0.447704 -0.445188 -0.037313 
 -0.446429 -0.445188 -0.018657 
 -0.445153 -0.445188 0.003731 
 -0.443878 -0.445188 0.026119 
 -0.455357 -0.445188 -0.145522 
 -0.454082 -0.445188 -0.141791 
 -0.452806 -0.445188 -0.126866 
 -0.451531 -0.445188 -0.108209 
 -0.448980 -0.445188 -0.059701 
 -0.446429 -0.445188 -0.018657 
 -0.445153 -0.445188 0.003731 
 -0.443878 -0.445188 0.026119 
 -0.442602 -0.445188 0.048507 
 -0.455357 -0.444606 -0.145522 
 -0.454082 -0.444606 -0.130597 
 -0.452806 -0.444606 -0.111940 
 -0.451531 -0.444606 -0.089552 
 -0.448980 -0.444606 -0.041045 
 -0.446429 -0.444606 0.000000 
 -0.445153 -0.444606 0.018657 
 -0.443878 -0.444606 0.029851 
 -0.442602 -0.444606 0.037313 
 -0.455357 -0.444024 -0.134328 
 -0.454082 -0.444024 -0.111940 
 -0.452806 -0.444024 -0.089552 
 -0.451531 -0.444024 -0.070896 
 -0.448980 -0.444024 -0.029851 
 -0.446429 -0.444024 -0.003731 
 -0.445153 -0.444024 0.000000 
 -0.443878 -0.444024 0.007463 
 -0.442602 -0.444024 0.014925 
 -0.455357 -0.443443 -0.115672 
 -0.454082 -0.443443 -0.097015 
 -0.452806 -0.443443 -0.078358 
 -0.451531 -0.443443 -0.063433 
 -0.448980 -0.443443 -0.052239 
 -0.446429 -0.443443 -0.041045 
 -0.445153 -0.443443 -0.041045 
 -0.443878 -0.443443 -0.037313 
 -0.442602 -0.443443 -0.033582 
 -0.454082 -0.443443 -0.097015 
 -0.452806 -0.443443 -0.078358 
 -0.451531 -0.443443 -0.063433 
 -0.450255 -0.443443 -0.055970 
 -0.447704 -0.443443 -0.044776 
 -0.445153 -0.443443 -0.041045 
 -0.443878 -0.443443 -0.037313 
 -0.442602 -0.443443 -0.033582 
 -0.441327 -0.443443 -0.022388 
 -0.454082 -0.442861 -0.093284 
 -0.452806 -0.442861 -0.082090 
 -0.451531 -0.442861 -0.078358 
 -0.450255 -0.442861 -0.078358 
 -0.447704 -0.442861 -0.070896 
 -0.445153 -0.442861 -0.067164 
 -0.443878 -0.442861 -0.063433 
 -0.442602 -0.442861 -0.059701 
 -0.441327 -0.442861 -0.048507 
 -0.454082 -0.442280 -0.104478 
 -0.452806 -0.442280 -0.104478 
 -0.451531 -0.442280 -0.104478 
 -0.450255 -0.442280 -0.104478 
 -0.447704 -0.442280 -0.097015 
 -0.445153 -0.442280 -0.093284 
 -0.443878 -0.442280 -0.089552 
 -0.442602 -0.442280 -0.082090 
 -0.441327 -0.442280 -0.074627 
 -0.452806 -0.442280 -0.104478 
 -0.451531 -0.442280 -0.104478 
 -0.450255 -0.442280 -0.104478 
 -0.448980 -0.442280 -0.100746 
 -0.446429 -0.442280 -0.097015 
 -0.443878 -0.442280 -0.089552 
 -0.442602 -0.442280 -0.082090 
 -0.441327 -0.442280 -0.074627 
 -0.440051 -0.442280 -0.063433 
 -0.452806 -0.441698 -0.145522 
 -0.451531 -0.441698 -0.145522 
 -0.450255 -0.441698 -0.145522 
 -0.448980 -0.441698 -0.141791 
 -0.446429 -0.441698 -0.138060 
 -0.443878 -0.441698 -0.130597 
 -0.442602 -0.441698 -0.119403 
 -0.441327 -0.441698 -0.111940 
 -0.440051 -0.441698 -0.108209 
 -0.452806 -0.441117 -0.175373 
 -0.451531 -0.441117 -0.171642 
 -0.450255 -0.441117 -0.171642 
 -0.448980 -0.441117 -0.171642 
 -0.446429 -0.441117 -0.164179 
 -0.443878 -0.441117 -0.152985 
 -0.442602 -0.441117 -0.145522 
 -0.441327 -0.441117 -0.138060 
 -0.440051 -0.441117 -0.134328 
 -0.451531 -0.441117 -0.171642 
 -0.450255 -0.441117 -0.171642 
 -0.448980 -0.441117 -0.171642 
 -0.447704 -0.441117 -0.167910 
 -0.445153 -0.441117 -0.160448 
 -0.442602 -0.441117 -0.145522 
 -0.441327 -0.441117 -0.138060 
 -0.440051 -0.441117 -0.134328 
 -0.438776 -0.441117 -0.130597 
 -0.451531 -0.440535 -0.216418 
 -0.450255 -0.440535 -0.216418 
 -0.448980 -0.440535 -0.212687 
 -0.447704 -0.440535 -0.208955 
 -0.445153 -0.440535 -0.197761 
 -0.442602 -0.440535 -0.179104 
 -0.441327 -0.440535 -0.171642 
 -0.440051 -0.440535 -0.167910 
 -0.438776 -0.440535 -0.160448 
 -0.451531 -0.439953 -0.235075 
 -0.450255 -0.439953 -0.231343 
 -0.448980 -0.439953 -0.231343 
 -0.447704 -0.439953 -0.227612 
 -0.445153 -0.439953 -0.212687 
 -0.442602 -0.439953 -0.194030 
 -0.441327 -0.439953 -0.179104 
 -0.440051 -0.439953 -0.175373 
 -0.438776 -0.439953 -0.160448 
 -0.450255 -0.439953 -0.231343 
 -0.448980 -0.439953 -0.231343 
 -0.447704 -0.439953 -0.227612 
 -0.446429 -0.439953 -0.223881 
 -0.443878 -0.439953 -0.205224 
 -0.441327 -0.439953 -0.179104 
 -0.440051 -0.439953 -0.175373 
 -0.438776 -0.439953 -0.160448 
 -0.437500 -0.439953 -0.156716 
 -0.450255 -0.439372 -0.250000 
 -0.448980 -0.439372 -0.246269 
 -0.447704 -0.439372 -0.231343 
 -0.446429 -0.439372 -0.220149 
 -0.443878 -0.439372 -0.186567 
 -0.441327 -0.439372 -0.160448 
 -0.440051 -0.439372 -0.145522 
 -0.438776 -0.439372 -0.134328 
 -0.437500 -0.439372 -0.123134 
 -0.450255 -0.438790 -0.250000 
 -0.448980 -0.438790 -0.238806 
 -0.447704 -0.438790 -0.227612 
 -0.446429 -0.438790 -0.212687 
 -0.443878 -0.438790 -0.171642 
 -0.441327 -0.438790 -0.141791 
 -0.440051 -0.438790 -0.126866 
 -0.438776 -0.438790 -0.111940 
 -0.437500 -0.438790 -0.097015 
 -0.450255 -0.438209 -0.227612 
 -0.448980 -0.438209 -0.212687 
 -0.447704 -0.438209 -0.208955 
 -0.446429 -0.438209 -0.194030 
 -0.443878 -0.438209 -0.156716 
 -0.441327 -0.438209 -0.115672 
 -0.440051 -0.438209 -0.097015 
 -0.438776 -0.438209 -0.078358 
 -0.437500 -0.438209 -0.063433 
 -0.448980 -0.438209 -0.212687 
 -0.447704 -0.438209 -0.208955 
 -0.446429 -0.438209 -0.194030 
 -0.445153 -0.438209 -0.182836 
 -0.442602 -0.438209 -0.134328 
 -0.440051 -0.438209 -0.097015 
 -0.438776 -0.438209 -0.078358 
 -0.437500 -0.438209 -0.063433 
 -0.436224 -0.438209 -0.048507 
 -0.448980 -0.437627 -0.190299 
 -0.447704 -0.437627 -0.182836 
 -0.446429 -0.437627 -0.175373 
 -0.445153 -0.437627 -0.164179 
 -0.442602 -0.437627 -0.134328 
 -0.440051 -0.437627 -0.082090 
 -0.438776 -0.437627 -0.059701 
 -0.437500 -0.437627 -0.041045 
 -0.436224 -0.437627 -0.026119 
 -0.448980 -0.437046 -0.171642 
 -0.447704 -0.437046 -0.152985 
 -0.446429 -0.437046 -0.138060 
 -0.445153 -0.437046 -0.130597 
 -0.442602 -0.437046 -0.115672 
 -0.440051 -0.437046 -0.078358 
 -0.438776 -0.437046 -0.052239 
 -0.437500 -0.437046 -0.026119 
 -0.436224 -0.437046 -0.003731 
 -0.447704 -0.437046 -0.152985 
 -0.446429 -0.437046 -0.138060 
 -0.445153 -0.437046 -0.130597 
 -0.443878 -0.437046 -0.126866 
 -0.441327 -0.437046 -0.100746 
 -0.438776 -0.437046 -0.052239 
 -0.437500 -0.437046 -0.026119 
 -0.436224 -0.437046 -0.003731 
 -0.434949 -0.437046 0.018657 
 -0.447704 -0.436464 -0.141791 
 -0.446429 -0.436464 -0.119403 
 -0.445153 -0.436464 -0.104478 
 -0.443878 -0.436464 -0.097015 
 -0.441327 -0.436464 -0.078358 
 -0.438776 -0.436464 -0.048507 
 -0.437500 -0.436464 -0.022388 
 -0.436224 -0.436464 0.003731 
 -0.434949 -0.436464 0.029851 
 -0.447704 -0.435883 -0.130597 
 -0.446429 -0.435883 -0.104478 
 -0.445153 -0.435883 -0.078358 
 -0.443878 -0.435883 -0.055970 
 -0.441327 -0.435883 -0.037313 
 -0.438776 -0.435883 -0.033582 
 -0.437500 -0.435883 -0.014925 
 -0.436224 -0.435883 0.011194 
 -0.434949 -0.435883 0.037313 
 -0.446429 -0.435883 -0.104478 
 -0.445153 -0.435883 -0.078358 
 -0.443878 -0.435883 -0.055970 
 -0.442602 -0.435883 -0.044776 
 -0.440051 -0.435883 -0.033582 
 -0.437500 -0.435883 -0.014925 
 -0.436224 -0.435883 0.011194 
 -0.434949 -0.435883 0.037313 
 -0.433673 -0.435883 0.063433 
 -0.446429 -0.435301 -0.093284 
 -0.445153 -0.435301 -0.063433 
 -0.443878 -0.435301 -0.041045 
 -0.442602 -0.435301 -0.018657 
 -0.440051 -0.435301 -0.007463 
 -0.437500 -0.435301 0.000000 
 -0.436224 -0.435301 0.018657 
 -0.434949 -0.435301 0.044776 
 -0.433673 -0.435301 0.070896 
 -0.446429 -0.434719 -0.070896 
 -0.445153 -0.434719 -0.048507 
 -0.443878 -0.434719 -0.018657 
 -0.442602 -0.434719 0.007463 
 -0.440051 -0.434719 0.033582 
 -0.437500 -0.434719 0.041045 
 -0.436224 -0.434719 0.048507 
 -0.434949 -0.434719 0.067164 
 -0.433673 -0.434719 0.089552 
 -0.445153 -0.434719 -0.048507 
 -0.443878 -0.434719 -0.018657 
 -0.442602 -0.434719 0.007463 
 -0.441327 -0.434719 0.026119 
 -0.438776 -0.434719 0.037313 
 -0.436224 -0.434719 0.048507 
 -0.434949 -0.434719 0.067164 
 -0.433673 -0.434719 0.089552 
 -0.432398 -0.434719 0.111940 
 -0.445153 -0.434138 -0.033582 
 -0.443878 -0.434138 -0.007463 
 -0.442602 -0.434138 0.022388 
 -0.441327 -0.434138 0.044776 
 -0.438776 -0.434138 0.067164 
 -0.436224 -0.434138 0.070896 
 -0.434949 -0.434138 0.085821 
 -0.433673 -0.434138 0.104478 
 -0.432398 -0.434138 0.126866 
 -0.445153 -0.433556 -0.011194 
 -0.443878 -0.433556 0.007463 
 -0.442602 -0.433556 0.033582 
 -0.441327 -0.433556 0.063433 
 -0.438776 -0.433556 0.093284 
 -0.436224 -0.433556 0.097015 
 -0.434949 -0.433556 0.108209 
 -0.433673 -0.433556 0.134328 
 -0.432398 -0.433556 0.152985 
 -0.445153 -0.432975 0.029851 
 -0.443878 -0.432975 0.044776 
 -0.442602 -0.432975 0.059701 
 -0.441327 -0.432975 0.082090 
 -0.438776 -0.432975 0.123134 
 -0.436224 -0.432975 0.138060 
 -0.434949 -0.432975 0.145522 
 -0.433673 -0.432975 0.156716 
 -0.432398 -0.432975 0.175373 
 -0.443878 -0.432975 0.044776 
 -0.442602 -0.432975 0.059701 
 -0.441327 -0.432975 0.082090 
 -0.440051 -0.432975 0.104478 
 -0.437500 -0.432975 0.134328 
 -0.434949 -0.432975 0.145522 
 -0.433673 -0.432975 0.156716 
 -0.432398 -0.432975 0.175373 
 -0.431122 -0.432975 0.190299 
 -0.443878 -0.432393 0.067164 
 -0.442602 -0.432393 0.085821 
 -0.441327 -0.432393 0.100746 
 -0.440051 -0.432393 0.119403 
 -0.437500 -0.432393 0.156716 
 -0.434949 -0.432393 0.179104 
 -0.433673 -0.432393 0.186567 
 -0.432398 -0.432393 0.194030 
 -0.431122 -0.432393 0.197761 
 -0.443878 -0.431812 0.070896 
 -0.442602 -0.431812 0.089552 
 -0.441327 -0.431812 0.108209 
 -0.440051 -0.431812 0.126866 
 -0.437500 -0.431812 0.167910 
 -0.434949 -0.431812 0.201493 
 -0.433673 -0.431812 0.212687 
 -0.432398 -0.431812 0.216418 
 -0.431122 -0.431812 0.208955 
 -0.442602 -0.431812 0.089552 
 -0.441327 -0.431812 0.108209 
 -0.440051 -0.431812 0.126866 
 -0.438776 -0.431812 0.145522 
 -0.436224 -0.431812 0.186567 
 -0.433673 -0.431812 0.212687 
 -0.432398 -0.431812 0.216418 
 -0.431122 -0.431812 0.208955 
 -0.429847 -0.431812 0.194030 
 -0.442602 -0.431230 0.074627 
 -0.441327 -0.431230 0.093284 
 -0.440051 -0.431230 0.111940 
 -0.438776 -0.431230 0.134328 
 -0.436224 -0.431230 0.179104 
 -0.433673 -0.431230 0.216418 
 -0.432398 -0.431230 0.220149 
 -0.431122 -0.431230 0.205224 
 -0.429847 -0.431230 0.179104 
 -0.442602 -0.430648 0.037313 
 -0.441327 -0.430648 0.067164 
 -0.440051 -0.430648 0.089552 
 -0.438776 -0.430648 0.111940 
 -0.436224 -0.430648 0.152985 
 -0.433673 -0.430648 0.197761 
 -0.432398 -0.430648 0.201493 
 -0.431122 -0.430648 0.186567 
 -0.429847 -0.430648 0.156716 
 -0.441327 -0.430648 0.067164 
 -0.440051 -0.430648 0.089552 
 -0.438776 -0.430648 0.111940 
 -0.437500 -0.430648 0.130597 
 -0.434949 -0.430648 0.179104 
 -0.432398 -0.430648 0.201493 
 -0.431122 -0.430648 0.186567 
 -0.429847 -0.430648 0.156716 
 -0.428571 -0.430648 0.130597 
 -0.441327 -0.430067 0.044776 
 -0.440051 -0.430067 0.070896 
 -0.438776 -0.430067 0.089552 
 -0.437500 -0.430067 0.108209 
 -0.434949 -0.430067 0.160448 
 -0.432398 -0.430067 0.190299 
 -0.431122 -0.430067 0.175373 
 -0.429847 -0.430067 0.149254 
 -0.428571 -0.430067 0.119403 
 -0.441327 -0.429485 0.018657 
 -0.440051 -0.429485 0.037313 
 -0.438776 -0.429485 0.055970 
 -0.437500 -0.429485 0.082090 
 -0.434949 -0.429485 0.141791 
 -0.432398 -0.429485 0.179104 
 -0.431122 -0.429485 0.167910 
 -0.429847 -0.429485 0.141791 
 -0.428571 -0.429485 0.115672 
 -0.440051 -0.429485 0.037313 
 -0.438776 -0.429485 0.055970 
 -0.437500 -0.429485 0.082090 
 -0.436224 -0.429485 0.111940 
 -0.433673 -0.429485 0.171642 
 -0.431122 -0.429485 0.167910 
 -0.429847 -0.429485 0.141791 
 -0.428571 -0.429485 0.115672 
 -0.427296 -0.429485 0.085821 
 -0.440051 -0.428904 0.029851 
 -0.438776 -0.428904 0.052239 
 -0.437500 -0.428904 0.085821 
 -0.436224 -0.428904 0.119403 
 -0.433673 -0.428904 0.175373 
 -0.431122 -0.428904 0.160448 
 -0.429847 -0.428904 0.134328 
 -0.428571 -0.428904 0.108209 
 -0.427296 -0.428904 0.082090 
 -0.440051 -0.428322 0.048507 
 -0.438776 -0.428322 0.067164 
 -0.437500 -0.428322 0.100746 
 -0.436224 -0.428322 0.134328 
 -0.433673 -0.428322 0.179104 
 -0.431122 -0.428322 0.152985
[truncated: 963,544 more chars]
