# Supplementary material for: Terrain Referenced Navigation Using a Multilayer Radial Basis Function-Based Extreme Learning Machine
Source: Hindawi journal article supplement (doi:10.1155/2019/9142694), 2019-07-11
Supplement: f1 [file 9142694.f1.zip › 9142694_Supplementary information files/TrainDB_ML_RBF_ELM_Using AE2_180919/kMeans/findClosestCentroids.m]

function memberships = findClosestCentroids(X, centroids)
%FINDCLOSESTCENTROIDS Computes the centroid memberships for every sample in X.
%   memberships = FINDCLOSESTCENTROIDS (X, centroids) Returns the index of the
%   closest centroid for every data point in X.
%   
%   In k-means clustering, data points are assigned to a cluster based on the
%   Euclidean distance between the data point and the cluster centroids.
%
%   Parameters
%     X         - The data set, with one sample per row.
%     centroids - The current centroids, one per row.
%   
%   Returns
%     A column vector containing the index of the closest centroid (a value
%     between 1 - k) for each corresponding data point in X.
%

% $Author: jungshin Lee $    $Date: 2017/09/05 $    $Revision: 1.0 $

% Set 'k' to the number of centers.
% k = [20 x 4]
k = size(centroids, 1);

% Set 'm' to the number of data points.
% X = [sample number x 4]
m = size(X, 1);

% 'memberships' will hold the cluster numbers for each example.
memberships = zeros(m, 1);

% Create a matrix to hold the distances between each data point and
% each cluster center.
% distances = [sample number x k]
distances = zeros(m, k);

% For each cluster...
for i = 1 : k
    
    % Rather than compute the full euclidean distance, we just compute
    % the squared distance (i.e., ommit the sqrt) since this is sufficient
    % for performing distance comparisons.
    
    % Subtract centroid i from all data points.
    diffs = bsxfun(@minus, X, centroids(i, :));
    
    % Square the
    % differences.
    sqrdDiffs = diffs .^ 2;
    
    % Take the sum of the squared differences.
    distances(:, i) = sum(sqrdDiffs, 2);

end

% Find the minimum distance value, also set the index of 
% the minimum distance value (in this case the indeces are 
% equal to the cluster numbers).
[minVals memberships] = min(distances, [], 2);

end
