# Supplementary material for: Terrain Referenced Navigation Using a Multilayer Radial Basis Function-Based Extreme Learning Machine
Source: Hindawi journal article supplement (doi:10.1155/2019/9142694), 2019-07-11
Supplement: f1 [file 9142694.f1.zip › 9142694_Supplementary information files/TrainDB_ML_RBF_ELM_Using AE2_180919/kMeans/kMeansInitCentroids.m]

function centroids = kMeansInitCentroids(X, k)
%KMEANSINITCENTROIDS Randomly selects k different data points from X to use as
% the initial centroids for k-Means clustering.
%   centroids = KMEANSINITCENTROIDS(X, k) returns k initial centroids to be
%   used with the k-Means on the dataset X
%
%   Parameters
%     X  - The dataset, one data point per row.
%     k  - The number of cluster centers.
%
%   Returns
%     A matrix of centroids with k rows.

% $Author: ChrisMcCormick $    $Date: 2013/08/15 22:00:00 $    $Revision: 1.0 $

centroids = zeros(k, size(X, 2));

% Randomly reorder the indices of examples
randidx = randperm(size(X, 1));

% Take the first k examples as centroids
centroids = X(randidx(1:k), :);

end
