# Supplementary material for: Terrain Referenced Navigation Using a Multilayer Radial Basis Function-Based Extreme Learning Machine
Source: Hindawi journal article supplement (doi:10.1155/2019/9142694), 2019-07-11
Supplement: f1 [file 9142694.f1.zip › 9142694_Supplementary information files/TrainDB_ML_RBF_ELM_Using AE2_180919/TestDBData3.dat]

-0.985987 -1.000000 0.294776 
 -0.985987 -0.999418 0.309701 
 -0.985987 -0.998837 0.324627 
 -0.984713 -0.998837 0.309701 
 -0.984713 -0.998255 0.339552 
 -0.984713 -0.997674 0.354478 
 -0.984713 -0.997092 0.373134 
 -0.983439 -0.997092 0.361940 
 -0.983439 -0.996511 0.365672 
 -0.983439 -0.995929 0.365672 
 -0.983439 -0.995347 0.358209 
 -0.982166 -0.995347 0.335821 
 -0.982166 -0.994766 0.332090 
 -0.982166 -0.994184 0.328358 
 -0.982166 -0.993603 0.328358 
 -0.980892 -0.993021 0.305970 
 -0.980892 -0.992440 0.298507 
 -0.980892 -0.991858 0.283582 
 -0.980892 -0.991277 0.279851 
 -0.979618 -0.991277 0.261194 
 -0.979618 -0.990695 0.253731 
 -0.979618 -0.990113 0.272388 
 -0.979618 -0.989532 0.291045 
 -0.978344 -0.989532 0.291045 
 -0.978344 -0.988950 0.302239 
 -0.978344 -0.988369 0.305970 
 -0.978344 -0.987787 0.302239 
 -0.977070 -0.987787 0.309701 
 -0.977070 -0.987206 0.309701 
 -0.977070 -0.986624 0.302239 
 -0.977070 -0.986042 0.291045 
 -0.975796 -0.986042 0.291045 
 -0.975796 -0.985461 0.276119 
 -0.975796 -0.984879 0.257463 
 -0.975796 -0.984298 0.235075 
 -0.974522 -0.984298 0.216418 
 -0.974522 -0.983716 0.197761 
 -0.974522 -0.983135 0.167910 
 -0.974522 -0.982553 0.152985 
 -0.973248 -0.982553 0.141791 
 -0.973248 -0.981972 0.126866 
 -0.973248 -0.981390 0.119403 
 -0.973248 -0.980808 0.104478 
 -0.971975 -0.980808 0.082090 
 -0.971975 -0.980227 0.089552 
 -0.971975 -0.979645 0.126866 
 -0.971975 -0.979064 0.152985 
 -0.970701 -0.979064 0.145522 
 -0.970701 -0.978482 0.164179 
 -0.970701 -0.977901 0.160448 
 -0.970701 -0.977319 0.138060 
 -0.969427 -0.977319 0.130597 
 -0.969427 -0.976737 0.097015 
 -0.969427 -0.976156 0.074627 
 -0.969427 -0.975574 0.041045 
 -0.968153 -0.975574 0.033582 
 -0.968153 -0.974993 0.014925 
 -0.968153 -0.974411 0.018657 
 -0.968153 -0.973830 0.044776 
 -0.966879 -0.973830 0.029851 
 -0.966879 -0.973248 0.055970 
 -0.966879 -0.972666 0.070896 
 -0.966879 -0.972085 0.078358 
 -0.965605 -0.972085 0.059701 
 -0.965605 -0.971503 0.055970 
 -0.965605 -0.970922 0.033582 
 -0.965605 -0.970340 0.014925 
 -0.964331 -0.970340 0.000000 
 -0.964331 -0.969759 -0.014925 
 -0.964331 -0.969177 -0.014925 
 -0.964331 -0.968596 0.011194 
 -0.963057 -0.968596 0.003731 
 -0.963057 -0.968014 0.022388 
 -0.963057 -0.967432 0.022388 
 -0.963057 -0.966851 0.011194 
 -0.961783 -0.966851 0.003731 
 -0.961783 -0.966269 -0.003731 
 -0.961783 -0.965688 -0.011194 
 -0.961783 -0.965106 0.003731 
 -0.960510 -0.965106 -0.003731 
 -0.960510 -0.964525 0.029851 
 -0.960510 -0.963943 0.048507 
 -0.960510 -0.963361 0.085821 
 -0.959236 -0.963361 0.089552 
 -0.959236 -0.962780 0.111940 
 -0.959236 -0.962198 0.138060 
 -0.959236 -0.961617 0.149254 
 -0.957962 -0.961617 0.134328 
 -0.957962 -0.961035 0.134328 
 -0.957962 -0.960454 0.111940 
 -0.957962 -0.959872 0.085821 
 -0.956688 -0.959872 0.078358 
 -0.956688 -0.959290 0.029851 
 -0.956688 -0.958709 0.011194 
 -0.955414 -0.958709 0.000000 
 -0.955414 -0.958127 0.011194 
 -0.955414 -0.957546 0.029851 
 -0.955414 -0.956964 0.055970 
 -0.954140 -0.956964 0.026119 
 -0.954140 -0.956383 0.041045 
 -0.954140 -0.955801 0.055970 
 -0.954140 -0.955220 0.067164 
 -0.952866 -0.955220 0.041045 
 -0.952866 -0.954638 0.055970 
 -0.952866 -0.954056 0.055970 
 -0.952866 -0.953475 0.048507 
 -0.951592 -0.953475 0.029851 
 -0.951592 -0.952893 0.026119 
 -0.951592 -0.952312 0.022388 
 -0.951592 -0.951730 0.022388 
 -0.950318 -0.951730 0.003731 
 -0.950318 -0.951149 0.007463 
 -0.950318 -0.950567 0.018657 
 -0.950318 -0.949985 0.029851 
 -0.949045 -0.949985 0.011194 
 -0.949045 -0.949404 0.033582 
 -0.949045 -0.948822 0.044776 
 -0.949045 -0.948241 0.037313 
 -0.947771 -0.948241 0.033582 
 -0.947771 -0.947659 0.018657 
 -0.947771 -0.947078 -0.003731 
 -0.947771 -0.946496 -0.033582 
 -0.946497 -0.946496 -0.033582 
 -0.946497 -0.945915 -0.082090 
 -0.946497 -0.945333 -0.104478 
 -0.945223 -0.944751 -0.130597 
 -0.945223 -0.944170 -0.130597 
 -0.945223 -0.943588 -0.123134 
 -0.943949 -0.943588 -0.134328 
 -0.943949 -0.943007 -0.115672 
 -0.943949 -0.942425 -0.097015 
 -0.943949 -0.941844 -0.067164 
 -0.942675 -0.941844 -0.085821 
 -0.942675 -0.941262 -0.067164 
 -0.942675 -0.940680 -0.048507 
 -0.942675 -0.940099 -0.041045 
 -0.941401 -0.940099 -0.063433 
 -0.941401 -0.939517 -0.070896 
 -0.941401 -0.938936 -0.082090 
 -0.941401 -0.938354 -0.100746 
 -0.940127 -0.938354 -0.115672 
 -0.940127 -0.937773 -0.134328 
 -0.940127 -0.937191 -0.164179 
 -0.940127 -0.936609 -0.182836 
 -0.938854 -0.936609 -0.201493 
 -0.938854 -0.936028 -0.246269 
 -0.938854 -0.935446 -0.261194 
 -0.937580 -0.935446 -0.272388 
 -0.937580 -0.934865 -0.276119 
 -0.937580 -0.934283 -0.287313 
 -0.937580 -0.933702 -0.287313 
 -0.936306 -0.933702 -0.287313 
 -0.936306 -0.933120 -0.287313 
 -0.936306 -0.932539 -0.291045 
 -0.936306 -0.931957 -0.291045 
 -0.935032 -0.931957 -0.291045 
 -0.935032 -0.931375 -0.291045 
 -0.935032 -0.930794 -0.291045 
 -0.935032 -0.930212 -0.294776 
 -0.933758 -0.930212 -0.291045 
 -0.933758 -0.929631 -0.294776 
 -0.933758 -0.929049 -0.298507 
 -0.932484 -0.929049 -0.294776 
 -0.932484 -0.928468 -0.294776 
 -0.932484 -0.927886 -0.294776 
 -0.932484 -0.927304 -0.294776 
 -0.931210 -0.927304 -0.294776 
 -0.931210 -0.926723 -0.294776 
 -0.931210 -0.926141 -0.294776 
 -0.931210 -0.925560 -0.302239 
 -0.929936 -0.925560 -0.302239 
 -0.929936 -0.924978 -0.305970 
 -0.929936 -0.924397 -0.305970 
 -0.928662 -0.924397 -0.305970 
 -0.928662 -0.923815 -0.305970 
 -0.928662 -0.923233 -0.305970 
 -0.928662 -0.922652 -0.305970 
 -0.927389 -0.922652 -0.305970 
 -0.927389 -0.922070 -0.305970 
 -0.927389 -0.921489 -0.302239 
 -0.927389 -0.920907 -0.302239 
 -0.926115 -0.920907 -0.302239 
 -0.926115 -0.920326 -0.302239 
 -0.926115 -0.919744 -0.298507 
 -0.924841 -0.919744 -0.298507 
 -0.924841 -0.919163 -0.294776 
 -0.924841 -0.918581 -0.291045 
 -0.924841 -0.917999 -0.291045 
 -0.923567 -0.917999 -0.291045 
 -0.923567 -0.917418 -0.291045 
 -0.923567 -0.916836 -0.283582 
 -0.923567 -0.916255 -0.279851 
 -0.922293 -0.916255 -0.279851 
 -0.922293 -0.915673 -0.272388 
 -0.922293 -0.915092 -0.264925 
 -0.921019 -0.915092 -0.268657 
 -0.921019 -0.914510 -0.264925 
 -0.921019 -0.913928 -0.257463 
 -0.921019 -0.913347 -0.253731 
 -0.919745 -0.913347 -0.257463 
 -0.919745 -0.912765 -0.257463 
 -0.919745 -0.912184 -0.253731 
 -0.919745 -0.911602 -0.253731 
 -0.918471 -0.911602 -0.257463 
 -0.918471 -0.911021 -0.253731 
 -0.918471 -0.910439 -0.250000 
 -0.917197 -0.910439 -0.253731 
 -0.917197 -0.909858 -0.246269 
 -0.917197 -0.909276 -0.246269 
 -0.917197 -0.908694 -0.242537 
 -0.915924 -0.908694 -0.246269 
 -0.915924 -0.908113 -0.242537 
 -0.915924 -0.907531 -0.242537 
 -0.914650 -0.907531 -0.250000 
 -0.914650 -0.906950 -0.246269 
 -0.914650 -0.906368 -0.242537 
 -0.914650 -0.905787 -0.238806 
 -0.913376 -0.905787 -0.242537 
 -0.913376 -0.905205 -0.238806 
 -0.913376 -0.904623 -0.238806 
 -0.912102 -0.904623 -0.242537 
 -0.912102 -0.904042 -0.238806 
 -0.912102 -0.903460 -0.238806 
 -0.912102 -0.902879 -0.235075 
 -0.910828 -0.902879 -0.238806 
 -0.910828 -0.902297 -0.235075 
 -0.910828 -0.901716 -0.231343 
 -0.909554 -0.901134 -0.231343 
 -0.909554 -0.900552 -0.227612 
 -0.909554 -0.899971 -0.223881 
 -0.908280 -0.899971 -0.227612 
 -0.908280 -0.899389 -0.223881 
 -0.908280 -0.898808 -0.220149 
 -0.907006 -0.898226 -0.216418 
 -0.907006 -0.897645 -0.216418 
 -0.907006 -0.897063 -0.212687 
 -0.905732 -0.897063 -0.212687 
 -0.905732 -0.896482 -0.216418 
 -0.905732 -0.895900 -0.212687 
 -0.905732 -0.895318 -0.212687 
 -0.904459 -0.895318 -0.212687 
 -0.904459 -0.894737 -0.208955 
 -0.904459 -0.894155 -0.201493 
 -0.903185 -0.894155 -0.208955 
 -0.903185 -0.893574 -0.201493 
 -0.903185 -0.892992 -0.194030 
 -0.901911 -0.892992 -0.201493 
 -0.901911 -0.892411 -0.194030 
 -0.901911 -0.891829 -0.194030 
 -0.901911 -0.891247 -0.190299 
 -0.900637 -0.891247 -0.194030 
 -0.900637 -0.890666 -0.190299 
 -0.900637 -0.890084 -0.190299 
 -0.899363 -0.890084 -0.194030 
 -0.899363 -0.889503 -0.182836 
 -0.899363 -0.888921 -0.179104 
 -0.899363 -0.888340 -0.175373 
 -0.898089 -0.888340 -0.171642 
 -0.898089 -0.887758 -0.171642 
 -0.898089 -0.887177 -0.156716 
 -0.896815 -0.887177 -0.156716 
 -0.896815 -0.886595 -0.156716 
 -0.896815 -0.886013 -0.156716 
 -0.896815 -0.885432 -0.149254 
 -0.895541 -0.885432 -0.152985 
 -0.895541 -0.884850 -0.138060 
 -0.895541 -0.884269 -0.130597 
 -0.894268 -0.884269 -0.138060 
 -0.894268 -0.883687 -0.130597 
 -0.894268 -0.883106 -0.119403 
 -0.894268 -0.882524 -0.119403 
 -0.892994 -0.882524 -0.119403 
 -0.892994 -0.881942 -0.119403 
 -0.892994 -0.881361 -0.111940 
 -0.891720 -0.881361 -0.085821 
 -0.891720 -0.880779 -0.078358 
 -0.891720 -0.880198 -0.078358 
 -0.890446 -0.880198 -0.059701 
 -0.890446 -0.879616 -0.048507 
 -0.890446 -0.879035 -0.044776 
 -0.890446 -0.878453 -0.037313 
 -0.889172 -0.878453 -0.029851 
 -0.889172 -0.877871 -0.026119 
 -0.889172 -0.877290 -0.018657 
 -0.887898 -0.877290 -0.003731 
 -0.887898 -0.876708 -0.003731 
 -0.887898 -0.876127 -0.003731 
 -0.886624 -0.875545 0.007463 
 -0.886624 -0.874964 0.000000 
 -0.886624 -0.874382 0.000000 
 -0.885350 -0.874382 0.011194 
 -0.885350 -0.873801 0.007463 
 -0.885350 -0.873219 0.007463 
 -0.884076 -0.873219 0.022388 
 -0.884076 -0.872637 0.022388 
 -0.884076 -0.872056 0.037313 
 -0.884076 -0.871474 0.044776 
 -0.882803 -0.871474 0.059701 
 -0.882803 -0.870893 0.067164 
 -0.882803 -0.870311 0.078358 
 -0.881529 -0.870311 0.100746 
 -0.881529 -0.869730 0.111940 
 -0.881529 -0.869148 0.108209 
 -0.880255 -0.869148 0.138060 
 -0.880255 -0.868566 0.145522 
 -0.880255 -0.867985 0.149254 
 -0.880255 -0.867403 0.152985 
 -0.878981 -0.867403 0.182836 
 -0.878981 -0.866822 0.186567 
 -0.878981 -0.866240 0.190299 
 -0.877707 -0.866240 0.216418 
 -0.877707 -0.865659 0.220149 
 -0.877707 -0.865077 0.223881 
 -0.876433 -0.865077 0.246269 
 -0.876433 -0.864495 0.246269 
 -0.876433 -0.863914 0.250000 
 -0.876433 -0.863332 0.250000 
 -0.875159 -0.863332 0.272388 
 -0.875159 -0.862751 0.276119 
 -0.875159 -0.862169 0.283582 
 -0.873885 -0.862169 0.302239 
 -0.873885 -0.861588 0.305970 
 -0.873885 -0.861006 0.313433 
 -0.872611 -0.861006 0.332090 
 -0.872611 -0.860425 0.335821 
 -0.872611 -0.859843 0.339552 
 -0.871338 -0.859843 0.365672 
 -0.871338 -0.859261 0.365672 
 -0.871338 -0.858680 0.373134 
 -0.871338 -0.858098 0.376866 
 -0.870064 -0.858098 0.395522 
 -0.870064 -0.857517 0.399254 
 -0.870064 -0.856935 0.399254 
 -0.868790 -0.856935 0.425373 
 -0.868790 -0.856354 0.425373 
 -0.868790 -0.855772 0.421642 
 -0.867516 -0.855772 0.455224 
 -0.867516 -0.855190 0.455224 
 -0.867516 -0.854609 0.462687 
 -0.867516 -0.854027 0.473881 
 -0.866242 -0.854027 0.507463 
 -0.866242 -0.853446 0.522388 
 -0.866242 -0.852864 0.544776 
 -0.864968 -0.852864 0.555970 
 -0.864968 -0.852283 0.585821 
 -0.864968 -0.851701 0.611940 
 -0.863694 -0.851701 0.615672 
 -0.863694 -0.851120 0.652985 
 -0.863694 -0.850538 0.679104 
 -0.862420 -0.850538 0.679104 
 -0.862420 -0.849956 0.723881 
 -0.862420 -0.849375 0.738806 
 -0.862420 -0.848793 0.761194 
 -0.861146 -0.848793 0.768657 
 -0.861146 -0.848212 0.783582 
 -0.861146 -0.847630 0.794776 
 -0.859873 -0.847630 0.809701 
 -0.859873 -0.847049 0.805970 
 -0.859873 -0.846467 0.802239 
 -0.858599 -0.846467 0.817164 
 -0.858599 -0.845885 0.805970 
 -0.858599 -0.845304 0.798507 
 -0.857325 -0.845304 0.813433 
 -0.857325 -0.844722 0.791045 
 -0.857325 -0.844141 0.772388 
 -0.857325 -0.843559 0.746269 
 -0.856051 -0.843559 0.742537 
 -0.856051 -0.842978 0.723881 
 -0.856051 -0.842396 0.694030 
 -0.854777 -0.842396 0.679104 
 -0.854777 -0.841814 0.652985 
 -0.854777 -0.841233 0.619403 
 -0.853503 -0.841233 0.608209 
 -0.853503 -0.840651 0.593284 
 -0.853503 -0.840070 0.567164 
 -0.852229 -0.840070 0.552239 
 -0.852229 -0.839488 0.533582 
 -0.852229 -0.838907 0.514925 
 -0.850955 -0.838907 0.507463 
 -0.850955 -0.838325 0.492537 
 -0.850955 -0.837744 0.477612 
 -0.850955 -0.837162 0.458955 
 -0.849682 -0.837162 0.455224 
 -0.849682 -0.836580 0.440299 
 -0.849682 -0.835999 0.432836 
 -0.848408 -0.835999 0.451493 
 -0.848408 -0.835417 0.447761 
 -0.848408 -0.834836 0.440299 
 -0.847134 -0.834836 0.466418 
 -0.847134 -0.834254 0.458955 
 -0.847134 -0.833673 0.451493 
 -0.845860 -0.833673 0.473881 
 -0.845860 -0.833091 0.462687 
 -0.845860 -0.832509 0.444030 
 -0.844586 -0.832509 0.462687 
 -0.844586 -0.831928 0.447761 
 -0.844586 -0.831346 0.432836 
 -0.843312 -0.830765 0.444030 
 -0.843312 -0.830183 0.455224 
 -0.843312 -0.829602 0.458955 
 -0.842038 -0.829602 0.473881 
 -0.842038 -0.829020 0.485075 
 -0.842038 -0.828438 0.496269 
 -0.840764 -0.828438 0.511194 
 -0.840764 -0.827857 0.522388 
 -0.840764 -0.827275 0.529851 
 -0.839490 -0.827275 0.544776 
 -0.839490 -0.826694 0.544776 
 -0.839490 -0.826112 0.552239 
 -0.838217 -0.826112 0.574627 
 -0.838217 -0.825531 0.582090 
 -0.838217 -0.824949 0.589552 
 -0.836943 -0.824949 0.608209 
 -0.836943 -0.824368 0.611940 
 -0.836943 -0.823786 0.630597 
 -0.835669 -0.823786 0.645522 
 -0.835669 -0.823204 0.645522 
 -0.835669 -0.822623 0.664179 
 -0.835669 -0.822041 0.675373 
 -0.834395 -0.822041 0.645522 
 -0.834395 -0.821460 0.649254 
 -0.834395 -0.820878 0.641791 
 -0.833121 -0.820878 0.604478 
 -0.833121 -0.820297 0.578358 
 -0.833121 -0.819715 0.552239 
 -0.831847 -0.819715 0.518657 
 -0.831847 -0.819133 0.485075 
 -0.831847 -0.818552 0.432836 
 -0.830573 -0.818552 0.402985 
 -0.830573 -0.817970 0.380597 
 -0.830573 -0.817389 0.350746 
 -0.829299 -0.817389 0.324627 
 -0.829299 -0.816807 0.313433 
 -0.829299 -0.816226 0.298507 
 -0.828025 -0.816226 0.272388 
 -0.828025 -0.815644 0.268657 
 -0.828025 -0.815063 0.294776 
 -0.826752 -0.815063 0.283582 
 -0.826752 -0.814481 0.305970 
 -0.826752 -0.813899 0.339552 
 -0.826752 -0.813318 0.361940 
 -0.825478 -0.813318 0.354478 
 -0.825478 -0.812736 0.361940 
 -0.825478 -0.812155 0.354478 
 -0.824204 -0.812155 0.324627 
 -0.824204 -0.811573 0.309701 
 -0.824204 -0.810992 0.309701 
 -0.822930 -0.810992 0.272388 
 -0.822930 -0.810410 0.283582 
 -0.822930 -0.809828 0.313433 
 -0.821656 -0.809828 0.305970 
 -0.821656 -0.809247 0.339552 
 -0.821656 -0.808665 0.391791 
 -0.820382 -0.808665 0.388060 
 -0.820382 -0.808084 0.432836 
 -0.820382 -0.807502 0.473881 
 -0.819108 -0.807502 0.458955 
 -0.819108 -0.806921 0.485075 
 -0.819108 -0.806339 0.507463 
 -0.817834 -0.806339 0.485075 
 -0.817834 -0.805757 0.473881 
 -0.817834 -0.805176 0.451493 
 -0.816561 -0.805176 0.425373 
 -0.816561 -0.804594 0.399254 
 -0.816561 -0.804013 0.358209 
 -0.815287 -0.803431 0.309701 
 -0.815287 -0.802850 0.305970 
 -0.815287 -0.802268 0.317164 
 -0.814013 -0.802268 0.294776 
 -0.814013 -0.801687 0.317164 
 -0.814013 -0.801105 0.354478 
 -0.812739 -0.801105 0.335821 
 -0.812739 -0.800523 0.376866 
 -0.812739 -0.799942 0.447761 
 -0.811465 -0.799942 0.425373 
 -0.811465 -0.799360 0.447761 
 -0.811465 -0.798779 0.436567 
 -0.810191 -0.798779 0.395522 
 -0.810191 -0.798197 0.395522 
 -0.810191 -0.797616 0.410448 
 -0.808917 -0.797616 0.380597 
 -0.808917 -0.797034 0.391791 
 -0.808917 -0.796452 0.410448 
 -0.807643 -0.796452 0.380597 
 -0.807643 -0.795871 0.391791 
 -0.807643 -0.795289 0.414179 
 -0.806369 -0.795289 0.388060 
 -0.806369 -0.794708 0.410448 
 -0.806369 -0.794126 0.436567 
 -0.805096 -0.794126 0.414179 
 -0.805096 -0.793545 0.432836 
 -0.805096 -0.792963 0.455224 
 -0.803822 -0.792963 0.429104 
 -0.803822 -0.792382 0.462687 
 -0.803822 -0.791800 0.496269 
 -0.802548 -0.791800 0.455224 
 -0.802548 -0.791218 0.529851 
 -0.802548 -0.790637 0.630597 
 -0.801274 -0.790637 0.555970 
 -0.801274 -0.790055 0.652985 
 -0.801274 -0.789474 0.682836 
 -0.801274 -0.788892 0.675373 
 -0.800000 -0.788892 0.619403 
 -0.800000 -0.788311 0.611940 
 -0.800000 -0.787729 0.608209 
 -0.798726 -0.787729 0.559701 
 -0.798726 -0.787147 0.570896 
 -0.798726 -0.786566 0.604478 
 -0.797452 -0.786566 0.578358 
 -0.797452 -0.785984 0.604478 
 -0.797452 -0.785403 0.645522 
 -0.796178 -0.785403 0.608209 
 -0.796178 -0.784821 0.619403 
 -0.796178 -0.784240 0.626866 
 -0.794904 -0.784240 0.589552 
 -0.794904 -0.783658 0.611940 
 -0.794904 -0.783076 0.634328 
 -0.793631 -0.783076 0.604478 
 -0.793631 -0.782495 0.638060 
 -0.793631 -0.781913 0.667910 
 -0.792357 -0.781913 0.649254 
 -0.792357 -0.781332 0.671642 
 -0.792357 -0.780750 0.667910 
 -0.791083 -0.780750 0.664179 
 -0.791083 -0.780169 0.652985 
 -0.791083 -0.779587 0.638060 
 -0.789809 -0.779587 0.641791 
 -0.789809 -0.779006 0.611940 
 -0.789809 -0.778424 0.589552 
 -0.788535 -0.778424 0.597015 
 -0.788535 -0.777842 0.574627 
 -0.788535 -0.777261 0.567164 
 -0.787261 -0.777261 0.570896 
 -0.787261 -0.776679 0.552239 
 -0.787261 -0.776098 0.537313 
 -0.785987 -0.776098 0.541045 
 -0.785987 -0.775516 0.507463 
 -0.785987 -0.774935 0.485075 
 -0.784713 -0.774935 0.492537 
 -0.784713 -0.774353 0.470149 
 -0.784713 -0.773771 0.436567 
 -0.783439 -0.773771 0.451493 
 -0.783439 -0.773190 0.429104 
 -0.783439 -0.772608 0.399254 
 -0.782166 -0.772608 0.414179 
 -0.782166 -0.772027 0.395522 
 -0.782166 -0.771445 0.373134 
 -0.780892 -0.771445 0.388060 
 -0.780892 -0.770864 0.380597 
 -0.780892 -0.770282 0.376866 
 -0.779618 -0.770282 0.402985 
 -0.779618 -0.769700 0.406716 
 -0.779618 -0.769119 0.406716 
 -0.778344 -0.768537 0.436567 
 -0.778344 -0.767956 0.436567 
 -0.778344 -0.767374 0.436567 
 -0.777070 -0.767374 0.447761 
 -0.777070 -0.766793 0.447761 
 -0.777070 -0.766211 0.451493 
 -0.775796 -0.766211 0.470149 
 -0.775796 -0.765630 0.477612 
 -0.775796 -0.765048 0.488806 
 -0.774522 -0.765048 0.503731 
 -0.774522 -0.764466 0.511194 
 -0.774522 -0.763885 0.518657 
 -0.773248 -0.763885 0.514925 
 -0.773248 -0.763303 0.522388 
 -0.773248 -0.762722 0.537313 
 -0.771975 -0.762722 0.511194 
 -0.771975 -0.762140 0.533582 
 -0.771975 -0.761559 0.548507 
 -0.770701 -0.761559 0.533582 
 -0.770701 -0.760977 0.537313 
 -0.770701 -0.760395 0.541045 
 -0.769427 -0.760395 0.507463 
 -0.769427 -0.759814 0.507463 
 -0.769427 -0.759232 0.511194 
 -0.768153 -0.759232 0.466418 
 -0.768153 -0.758651 0.462687 
 -0.768153 -0.758069 0.462687 
 -0.766879 -0.758069 0.417910 
 -0.766879 -0.757488 0.421642 
 -0.766879 -0.756906 0.425373 
 -0.765605 -0.756906 0.395522 
 -0.765605 -0.756325 0.436567 
 -0.765605 -0.755743 0.473881 
 -0.764331 -0.755743 0.455224 
 -0.764331 -0.755161 0.485075 
 -0.764331 -0.754580 0.492537 
 -0.763057 -0.754580 0.458955 
 -0.763057 -0.753998 0.466418 
 -0.763057 -0.753417 0.477612 
 -0.761783 -0.753417 0.451493 
 -0.761783 -0.752835 0.473881 
 -0.761783 -0.752254 0.492537 
 -0.760510 -0.752254 0.466418 
 -0.760510 -0.751672 0.496269 
 -0.760510 -0.751090 0.522388 
 -0.759236 -0.751090 0.511194 
 -0.759236 -0.750509 0.555970 
 -0.759236 -0.749927 0.567164 
 -0.757962 -0.749927 0.544776 
 -0.757962 -0.749346 0.548507 
 -0.757962 -0.748764 0.552239 
 -0.756688 -0.748764 0.544776 
 -0.756688 -0.748183 0.552239 
 -0.756688 -0.747601 0.537313 
 -0.755414 -0.747601 0.537313 
 -0.755414 -0.747019 0.511194 
 -0.755414 -0.746438 0.470149 
 -0.754140 -0.746438 0.466418 
 -0.754140 -0.745856 0.440299 
 -0.754140 -0.745275 0.388060 
 -0.752866 -0.744693 0.347015 
 -0.752866 -0.744112 0.283582 
 -0.752866 -0.743530 0.242537 
 -0.751592 -0.743530 0.238806 
 -0.751592 -0.742949 0.197761 
 -0.751592 -0.742367 0.164179 
 -0.750318 -0.742367 0.186567 
 -0.750318 -0.741785 0.160448 
 -0.750318 -0.741204 0.152985 
 -0.749045 -0.741204 0.190299 
 -0.749045 -0.740622 0.167910 
 -0.749045 -0.740041 0.156716 
 -0.747771 -0.740041 0.194030 
 -0.747771 -0.739459 0.175373 
 -0.747771 -0.738878 0.164179 
 -0.746497 -0.738878 0.197761 
 -0.746497 -0.738296 0.186567 
 -0.746497 -0.737714 0.167910 
 -0.745223 -0.737714 0.197761 
 -0.745223 -0.737133 0.186567 
 -0.745223 -0.736551 0.164179 
 -0.743949 -0.736551 0.190299 
 -0.743949 -0.735970 0.175373 
 -0.743949 -0.735388 0.149254 
 -0.742675 -0.735388 0.171642 
 -0.742675 -0.734807 0.152985 
 -0.742675 -0.734225 0.108209 
 -0.741401 -0.734225 0.126866 
 -0.741401 -0.733644 0.093284 
 -0.741401 -0.733062 0.022388 
 -0.740127 -0.733062 0.033582 
 -0.740127 -0.732480 -0.007463 
 -0.740127 -0.731899 -0.048507 
 -0.738854 -0.731899 -0.018657 
 -0.738854 -0.731317 -0.037313 
 -0.738854 -0.730736 -0.067164 
 -0.737580 -0.730736 -0.037313 
 -0.737580 -0.730154 -0.055970 
 -0.737580 -0.729573 -0.067164 
 -0.736306 -0.729573 -0.055970 
 -0.736306 -0.728991 -0.063433 
 -0.736306 -0.728409 -0.067164 
 -0.735032 -0.728409 -0.078358 
 -0.735032 -0.727828 -0.063433 
 -0.735032 -0.727246 -0.063433 
 -0.733758 -0.727246 -0.078358 
 -0.733758 -0.726665 -0.070896 
 -0.733758 -0.726083 -0.070896 
 -0.732484 -0.726083 -0.093284 
 -0.732484 -0.725502 -0.100746 
 -0.732484 -0.724920 -0.115672 
 -0.731210 -0.724920 -0.149254 
 -0.731210 -0.724338 -0.167910 
 -0.731210 -0.723757 -0.186567 
 -0.731210 -0.723175 -0.212687 
 -0.729936 -0.723175 -0.235075 
 -0.729936 -0.722594 -0.242537 
 -0.729936 -0.722012 -0.242537 
 -0.728662 -0.722012 -0.268657 
 -0.728662 -0.721431 -0.272388 
 -0.728662 -0.720849 -0.276119 
 -0.727389 -0.720849 -0.298507 
 -0.727389 -0.720268 -0.309701 
 -0.727389 -0.719686 -0.317164 
 -0.726115 -0.719686 -0.339552 
 -0.726115 -0.719104 -0.350746 
 -0.726115 -0.718523 -0.358209 
 -0.724841 -0.718523 -0.380597 
 -0.724841 -0.717941 -0.388060 
 -0.724841 -0.717360 -0.391791 
 -0.723567 -0.717360 -0.414179 
 -0.723567 -0.716778 -0.421642 
 -0.723567 -0.716197 -0.425373 
 -0.722293 -0.716197 -0.451493 
 -0.722293 -0.715615 -0.458955 
 -0.722293 -0.715033 -0.466418 
 -0.721019 -0.715033 -0.488806 
 -0.721019 -0.714452 -0.492537 
 -0.721019 -0.713870 -0.503731 
 -0.719745 -0.713870 -0.496269 
 -0.719745 -0.713289 -0.503731 
 -0.719745 -0.712707 -0.507463 
 -0.718471 -0.712707 -0.496269 
 -0.718471 -0.712126 -0.496269 
 -0.718471 -0.711544 -0.492537 
 -0.717197 -0.711544 -0.477612 
 -0.717197 -0.710962 -0.477612 
 -0.717197 -0.710381 -0.473881 
 -0.715924 -0.710381 -0.455224 
 -0.715924 -0.709799 -0.455224 
 -0.715924 -0.709218 -0.455224 
 -0.714650 -0.709218 -0.432836 
 -0.714650 -0.708636 -0.432836 
 -0.714650 -0.708055 -0.436567 
 -0.713376 -0.708055 -0.410448 
 -0.713376 -0.707473 -0.417910 
 -0.713376 -0.706892 -0.429104 
 -0.712102 -0.706892 -0.410448 
 -0.712102 -0.706310 -0.417910 
 -0.712102 -0.705728 -0.406716 
 -0.710828 -0.705728 -0.384328 
 -0.710828 -0.705147 -0.376866 
 -0.710828 -0.704565 -0.365672 
 -0.709554 -0.704565 -0.339552 
 -0.709554 -0.703984 -0.335821 
 -0.709554 -0.703402 -0.335821 
 -0.708280 -0.702821 -0.317164 
 -0.708280 -0.702239 -0.328358 
 -0.708280 -0.701657 -0.347015 
 -0.707006 -0.701657 -0.324627 
 -0.707006 -0.701076 -0.358209 
 -0.707006 -0.700494 -0.410448 
 -0.705732 -0.700494 -0.410448 
 -0.705732 -0.699913 -0.440299 
 -0.705732 -0.699331 -0.485075 
 -0.704459 -0.699331 -0.477612 
 -0.704459 -0.698750 -0.503731 
 -0.704459 -0.698168 -0.529851 
 -0.703185 -0.698168 -0.522388 
 -0.703185 -0.697587 -0.541045 
 -0.703185 -0.697005 -0.570896 
 -0.701911 -0.697005 -0.563433 
 -0.701911 -0.696423 -0.582090 
 -0.701911 -0.695842 -0.604478 
 -0.700637 -0.695842 -0.597015 
 -0.700637 -0.695260 -0.608209 
 -0.700637 -0.694679 -0.623134 
 -0.699363 -0.694679 -0.611940 
 -0.699363 -0.694097 -0.623134 
 -0.699363 -0.693516 -0.641791 
 -0.698089 -0.693516 -0.626866 
 -0.698089 -0.692934 -0.667910 
 -0.698089 -0.692352 -0.686567 
 -0.696815 -0.692352 -0.667910 
 -0.696815 -0.691771 -0.690299 
 -0.696815 -0.691189 -0.705224 
 -0.695541 -0.691189 -0.690299 
 -0.695541 -0.690608 -0.716418 
 -0.695541 -0.690026 -0.742537 
 -0.694268 -0.690026 -0.723881 
 -0.694268 -0.689445 -0.757463 
 -0.694268 -0.688863 -0.757463 
 -0.692994 -0.688863 -0.757463 
 -0.692994 -0.688281 -0.757463 
 -0.692994 -0.687700 -0.764925 
 -0.691720 -0.687700 -0.750000 
 -0.691720 -0.687118 -0.772388 
 -0.691720 -0.686537 -0.787313 
 -0.690446 -0.685955 -0.794776 
 -0.690446 -0.685374 -0.805970 
 -0.690446 -0.684792 -0.809701 
 -0.689172 -0.684792 -0.809701 
 -0.689172 -0.684211 -0.813433 
 -0.689172 -0.683629 -0.824627 
 -0.687898 -0.683629 -0.824627 
 -0.687898 -0.683047 -0.828358 
 -0.687898 -0.682466 -0.824627 
 -0.686624 -0.682466 -0.828358 
 -0.686624 -0.681884 -0.828358 
 -0.686624 -0.681303 -0.828358 
 -0.685350 -0.681303 -0.828358 
 -0.685350 -0.680721 -0.832090 
 -0.685350 -0.680140 -0.835821 
 -0.684076 -0.680140 -0.839552 
 -0.684076 -0.679558 -0.839552 
 -0.684076 -0.678976 -0.839552 
 -0.682803 -0.678976 -0.839552 
 -0.682803 -0.678395 -0.843284 
 -0.682803 -0.677813 -0.843284 
 -0.681529 -0.677813 -0.847015 
 -0.681529 -0.677232 -0.843284 
 -0.681529 -0.676650 -0.843284 
 -0.680255 -0.676650 -0.850746 
 -0.680255 -0.676069 -0.850746 
 -0.680255 -0.675487 -0.847015 
 -0.678981 -0.675487 -0.850746 
 -0.678981 -0.674905 -0.850746 
 -0.678981 -0.674324 -0.850746 
 -0.677707 -0.674324 -0.854478 
 -0.677707 -0.673742 -0.858209 
 -0.677707 -0.673161 -0.858209 
 -0.676433 -0.673161 -0.865672 
 -0.676433 -0.672579 -0.865672 
 -0.676433 -0.671998 -0.865672 
 -0.676433 -0.671416 -0.865672 
 -0.675159 -0.671416 -0.865672 
 -0.675159 -0.670835 -0.869403 
 -0.675159 -0.670253 -0.869403 
 -0.673885 -0.670253 -0.873134 
 -0.673885 -0.669671 -0.876866 
 -0.673885 -0.669090 -0.876866 
 -0.672611 -0.669090 -0.880597 
 -0.672611 -0.668508 -0.884328 
 -0.672611 -0.667927 -0.884328 
 -0.671338 -0.667927 -0.884328 
 -0.671338 -0.667345 -0.884328 
 -0.671338 -0.666764 -0.884328 
 -0.670064 -0.666764 -0.884328 
 -0.670064 -0.666182 -0.884328 
 -0.670064 -0.665600 -0.884328 
 -0.668790 -0.665600 -0.884328 
 -0.668790 -0.665019 -0.884328 
 -0.668790 -0.664437 -0.884328 
 -0.667516 -0.664437 -0.884328 
 -0.667516 -0.663856 -0.888060 
 -0.667516 -0.663274 -0.888060 
 -0.666242 -0.663274 -0.888060 
 -0.666242 -0.662693 -0.891791 
 -0.666242 -0.662111 -0.895522 
 -0.664968 -0.662111 -0.895522 
 -0.664968 -0.661530 -0.895522 
 -0.664968 -0.660948 -0.899254 
 -0.663694 -0.660366 -0.902985 
 -0.663694 -0.659785 -0.902985 
 -0.663694 -0.659203 -0.902985 
 -0.662420 -0.659203 -0.902985 
 -0.662420 -0.658622 -0.902985 
 -0.662420 -0.658040 -0.902985 
 -0.661146 -0.658040 -0.902985 
 -0.661146 -0.657459 -0.899254 
 -0.661146 -0.656877 -0.850746 
 -0.659873 -0.656877 -0.854478 
 -0.659873 -0.656295 -0.828358 
 -0.659873 -0.655714 -0.865672 
 -0.658599 -0.655714 -0.865672 
 -0.658599 -0.655132 -0.865672 
 -0.658599 -0.654551 -0.865672 
 -0.657325 -0.654551 -0.865672 
 -0.657325 -0.653969 -0.865672 
 -0.657325 -0.653388 -0.843284 
 -0.656051 -0.653388 -0.869403 
 -0.656051 -0.652806 -0.854478 
 -0.656051 -0.652224 -0.876866 
 -0.654777 -0.652224 -0.888060 
 -0.654777 -0.651643 -0.899254 
 -0.654777 -0.651061 -0.910448 
 -0.653503 -0.651061 -0.910448 
 -0.653503 -0.650480 -0.917910 
 -0.653503 -0.649898 -0.921642 
 -0.653503 -0.649317 -0.921642 
 -0.652229 -0.649317 -0.921642 
 -0.652229 -0.648735 -0.921642 
 -0.652229 -0.648154 -0.921642 
 -0.650955 -0.648154 -0.925373 
 -0.650955 -0.647572 -0.940299 
 -0.650955 -0.646990 -0.940299 
 -0.649682 -0.646990 -0.925373 
 -0.649682 -0.646409 -0.929104 
 -0.649682 -0.645827 -0.932836 
 -0.648408 -0.645827 -0.925373 
 -0.648408 -0.645246 -0.936567 
 -0.648408 -0.644664 -0.940299 
 -0.647134 -0.644664 -0.940299 
 -0.647134 -0.644083 -0.940299 
 -0.647134 -0.643501 -0.940299 
 -0.645860 -0.643501 -0.940299 
 -0.645860 -0.642919 -0.940299 
 -0.645860 -0.642338 -0.940299 
 -0.644586 -0.642338 -0.940299 
 -0.644586 -0.641756 -0.940299 
 -0.644586 -0.641175 -0.940299 
 -0.643312 -0.641175 -0.940299 
 -0.643312 -0.640593 -0.940299 
 -0.643312 -0.640012 -0.940299 
 -0.643312 -0.639430 -0.940299 
 -0.642038 -0.639430 -0.940299 
 -0.642038 -0.638849 -0.940299 
 -0.642038 -0.638267 -0.940299 
 -0.640764 -0.638267 -0.940299 
 -0.640764 -0.637685 -0.940299 
 -0.640764 -0.637104 -0.940299 
 -0.639490 -0.637104 -0.940299 
 -0.639490 -0.636522 -0.940299 
 -0.639490 -0.635941 -0.940299 
 -0.638217 -0.635941 -0.940299 
 -0.638217 -0.635359 -0.940299 
 -0.638217 -0.634778 -0.940299 
 -0.636943 -0.634778 -0.940299 
 -0.636943 -0.634196 -0.940299 
 -0.636943 -0.633614 -0.940299 
 -0.635669 -0.633614 -0.940299 
 -0.635669 -0.633033 -0.940299 
 -0.635669 -0.632451 -0.940299 
 -0.634395 -0.632451 -0.940299 
 -0.634395 -0.631870 -0.940299 
 -0.634395 -0.631288 -0.940299 
 -0.634395 -0.630707 -0.940299 
 -0.633121 -0.630707 -0.940299 
 -0.633121 -0.630125 -0.940299 
 -0.633121 -0.629543 -0.940299 
 -0.631847 -0.629543 -0.940299 
 -0.631847 -0.628962 -0.940299 
 -0.631847 -0.628380 -0.940299 
 -0.630573 -0.628380 -0.940299 
 -0.630573 -0.627799 -0.940299 
 -0.630573 -0.627217 -0.940299 
 -0.629299 -0.627217 -0.940299 
 -0.629299 -0.626636 -0.940299 
 -0.629299 -0.626054 -0.936567 
 -0.628025 -0.626054 -0.936567 
 -0.628025 -0.625473 -0.936567 
 -0.628025 -0.624891 -0.936567 
 -0.626752 -0.624891 -0.936567 
 -0.626752 -0.624309 -0.936567 
 -0.626752 -0.623728 -0.936567 
 -0.625478 -0.623728 -0.936567 
 -0.625478 -0.623146 -0.936567 
 -0.625478 -0.622565 -0.936567 
 -0.625478 -0.621983 -0.936567 
 -0.624204 -0.621983 -0.936567 
 -0.624204 -0.621402 -0.936567 
 -0.624204 -0.620820 -0.936567 
 -0.622930 -0.620820 -0.936567 
 -0.622930 -0.620238 -0.932836 
 -0.622930 -0.619657 -0.932836 
 -0.621656 -0.619657 -0.932836 
 -0.621656 -0.619075 -0.932836 
 -0.621656 -0.618494 -0.929104 
 -0.620382 -0.618494 -0.929104 
 -0.620382 -0.617912 -0.929104 
 -0.620382 -0.617331 -0.925373 
 -0.619108 -0.617331 -0.925373 
 -0.619108 -0.616749 -0.925373 
 -0.619108 -0.616167 -0.925373 
 -0.617834 -0.616167 -0.925373 
 -0.617834 -0.615586 -0.925373 
 -0.617834 -0.615004 -0.917910 
 -0.616561 -0.614423 -0.876866 
 -0.616561 -0.613841 -0.865672 
 -0.616561 -0.613260 -0.858209 
 -0.615287 -0.613260 -0.828358 
 -0.615287 -0.612678 -0.824627 
 -0.615287 -0.612097 -0.832090 
 -0.614013 -0.612097 -0.805970 
 -0.614013 -0.611515 -0.813433 
 -0.614013 -0.610933 -0.776119 
 -0.612739 -0.610933 -0.768657 
 -0.612739 -0.610352 -0.746269 
 -0.612739 -0.609770 -0.727612 
 -0.611465 -0.609770 -0.708955 
 -0.611465 -0.609189 -0.708955 
 -0.611465 -0.608607 -0.716418 
 -0.610191 -0.608607 -0.694030 
 -0.610191 -0.608026 -0.701493 
 -0.610191 -0.607444 -0.697761 
 -0.608917 -0.607444 -0.679104 
 -0.608917 -0.606862 -0.671642 
 -0.608917 -0.606281 -0.641791 
 -0.608917 -0.605699 -0.615672 
 -0.607643 -0.605699 -0.600746 
 -0.607643 -0.605118 -0.563433 
 -0.607643 -0.604536 -0.548507 
 -0.606369 -0.604536 -0.529851 
 -0.606369 -0.603955 -0.526119 
 -0.606369 -0.603373 -0.541045 
 -0.605096 -0.603373 -0.522388 
 -0.605096 -0.602792 -0.541045 
 -0.605096 -0.602210 -0.570896 
 -0.603822 -0.602210 -0.555970 
 -0.603822 -0.601628 -0.582090 
 -0.603822 -0.601047 -0.615672 
 -0.602548 -0.601047 -0.608209 
 -0.602548 -0.600465 -0.630597 
 -0.602548 -0.599884 -0.667910 
 -0.601274 -0.599884 -0.656716 
 -0.601274 -0.599302 -0.667910 
 -0.601274 -0.598721 -0.682836 
 -0.601274 -0.598139 -0.686567 
 -0.600000 -0.598139 -0.679104 
 -0.600000 -0.597557 -0.671642 
 -0.600000 -0.596976 -0.664179 
 -0.598726 -0.596976 -0.641791 
 -0.598726 -0.596394 -0.645522 
 -0.598726 -0.595813 -0.652985 
 -0.597452 -0.595813 -0.630597 
 -0.597452 -0.595231 -0.638060 
 -0.597452 -0.594650 -0.649254 
 -0.596178 -0.594650 -0.619403 
 -0.596178 -0.594068 -0.619403 
 -0.596178 -0.593486 -0.604478 
 -0.594904 -0.593486 -0.589552 
 -0.594904 -0.592905 -0.567164 
 -0.594904 -0.592323 -0.522388 
 -0.593631 -0.591742 -0.492537 
 -0.593631 -0.591160 -0.451493 
 -0.593631 -0.590579 -0.440299 
 -0.592357 -0.590579 -0.421642 
 -0.592357 -0.589997 -0.417910 
 -0.592357 -0.589416 -0.417910 
 -0.591083 -0.589416 -0.391791 
 -0.591083 -0.588834 -0.391791 
 -0.591083 -0.588252 -0.395522 
 -0.589809 -0.588252 -0.391791 
 -0.589809 -0.587671 -0.432836 
 -0.589809 -0.587089 -0.458955 
 -0.588535 -0.587089 -0.466418 
 -0.588535 -0.586508 -0.492537 
 -0.588535 -0.585926 -0.526119 
 -0.587261 -0.585926 -0.537313 
 -0.587261 -0.585345 -0.559701 
 -0.587261 -0.584763 -0.593284 
 -0.587261 -0.584181 -0.608209 
 -0.585987 -0.584181 -0.593284 
 -0.585987 -0.583600 -0.611940 
 -0.585987 -0.583018 -0.626866 
 -0.584713 -0.583018 -0.615672 
 -0.584713 -0.582437 -0.626866 
 -0.584713 -0.581855 -0.623134 
 -0.583439 -0.581855 -0.604478 
 -0.583439 -0.581274 -0.585821 
 -0.583439 -0.580692 -0.570896 
 -0.582166 -0.580692 -0.552239 
 -0.582166 -0.580110 -0.544776 
 -0.582166 -0.579529 -0.552239 
 -0.580892 -0.579529 -0.533582 
 -0.580892 -0.578947 -0.555970 
 -0.580892 -0.578366 -0.567164 
 -0.579618 -0.578366 -0.544776 
 -0.579618 -0.577784 -0.529851 
 -0.579618 -0.577203 -0.511194 
 -0.579618 -0.576621 -0.485075 
 -0.578344 -0.576621 -0.466418 
 -0.578344 -0.576040 -0.455224 
 -0.578344 -0.575458 -0.466418 
 -0.577070 -0.575458 -0.462687 
 -0.577070 -0.574876 -0.496269 
 -0.577070 -0.574295 -0.522388 
 -0.575796 -0.574295 -0.526119 
 -0.575796 -0.573713 -0.567164 
 -0.575796 -0.573132 -0.597015 
 -0.574522 -0.573132 -0.593284 
 -0.574522 -0.572550 -0.608209 
 -0.574522 -0.571969 -0.608209 
 -0.573248 -0.571969 -0.597015 
 -0.573248 -0.571387 -0.578358 
 -0.573248 -0.570805 -0.567164 
 -0.571975 -0.570805 -0.548507 
 -0.571975 -0.570224 -0.533582 
 -0.571975 -0.569642 -0.522388 
 -0.571975 -0.569061 -0.518657 
 -0.570701 -0.569061 -0.492537 
 -0.570701 -0.568479 -0.500000 
 -0.570701 -0.567898 -0.511194 
 -0.569427 -0.567898 -0.488806 
 -0.569427 -0.567316 -0.488806 
 -0.569427 -0.566735 -0.470149 
 -0.568153 -0.566735 -0.458955 
 -0.568153 -0.566153 -0.425373 
 -0.568153 -0.565571 -0.402985 
 -0.566879 -0.565571 -0.391791 
 -0.566879 -0.564990 -0.365672 
 -0.566879 -0.564408 -0.350746 
 -0.565605 -0.564408 -0.339552 
 -0.565605 -0.563827 -0.332090 
 -0.565605 -0.563245 -0.335821 
 -0.565605 -0.562664 -0.347015 
 -0.564331 -0.562664 -0.373134 
 -0.564331 -0.562082 -0.388060 
 -0.564331 -0.561500 -0.395522 
 -0.563057 -0.561500 -0.421642 
 -0.563057 -0.560919 -0.429104 
 -0.563057 -0.560337 -0.436567 
 -0.561783 -0.560337 -0.466418 
 -0.561783 -0.559756 -0.470149 
 -0.561783 -0.559174 -0.473881 
 -0.560510 -0.559174 -0.496269 
 -0.560510 -0.558593 -0.503731 
 -0.560510 -0.558011 -0.522388 
 -0.559236 -0.558011 -0.541045 
 -0.559236 -0.557429 -0.563433 
 -0.559236 -0.556848 -0.582090 
 -0.559236 -0.556266 -0.608209 
 -0.557962 -0.556266 -0.615672 
 -0.557962 -0.555685 -0.634328 
 -0.557962 -0.555103 -0.660448 
 -0.556688 -0.555103 -0.667910 
 -0.556688 -0.554522 -0.686567 
 -0.556688 -0.553940 -0.723881 
 -0.555414 -0.553940 -0.738806 
 -0.555414 -0.553359 -0.735075 
 -0.555414 -0.552777 -0.735075 
 -0.554140 -0.552777 -0.735075 
 -0.554140 -0.552195 -0.720149 
 -0.554140 -0.551614 -0.694030 
 -0.552866 -0.551614 -0.686567 
 -0.552866 -0.551032 -0.667910 
 -0.552866 -0.550451 -0.649254 
 -0.552866 -0.549869 -0.623134 
 -0.551592 -0.549869 -0.623134 
 -0.551592 -0.549288 -0.604478 
 -0.551592 -0.548706 -0.578358 
 -0.550318 -0.548706 -0.578358 
 -0.550318 -0.548124 -0.563433 
 -0.550318 -0.547543 -0.533582 
 -0.549045 -0.547543 -0.544776 
 -0.549045 -0.546961 -0.526119 
 -0.549045 -0.546380 -0.500000 
 -0.547771 -0.546380 -0.507463 
 -0.547771 -0.545798 -0.488806 
 -0.547771 -0.545217 -0.455224 
 -0.546497 -0.545217 -0.477612 
 -0.546497 -0.544635 -0.462687 
 -0.546497 -0.544054 -0.447761 
 -0.546497 -0.543472 -0.436567 
 -0.545223 -0.543472 -0.470149 
 -0.545223 -0.542890 -0.462687 
 -0.545223 -0.542309 -0.458955 
 -0.543949 -0.542309 -0.488806 
 -0.543949 -0.541727 -0.488806 
 -0.543949 -0.541146 -0.492537 
 -0.542675 -0.541146 -0.514925 
 -0.542675 -0.540564 -0.507463 
 -0.542675 -0.539983 -0.485075 
 -0.541401 -0.539983 -0.503731 
 -0.541401 -0.539401 -0.492537 
 -0.541401 -0.538819 -0.481343 
 -0.540127 -0.538238 -0.511194 
 -0.540127 -0.537656 -0.511194 
 -0.540127 -0.537075 -0.511194 
 -0.538854 -0.537075 -0.507463 
 -0.538854 -0.536493 -0.477612 
 -0.538854 -0.535912 -0.458955 
 -0.537580 -0.535912 -0.436567 
 -0.537580 -0.535330 -0.410448 
 -0.537580 -0.534748 -0.391791 
 -0.536306 -0.534748 -0.369403 
 -0.536306 -0.534167 -0.343284 
 -0.536306 -0.533585 -0.335821 
 -0.535032 -0.533585 -0.305970 
 -0.535032 -0.533004 -0.294776 
 -0.535032 -0.532422 -0.291045 
 -0.535032 -0.531841 -0.287313 
 -0.533758 -0.531841 -0.268657 
 -0.533758 -0.531259 -0.268657 
 -0.533758 -0.530678 -0.264925 
 -0.532484 -0.530678 -0.268657 
 -0.532484 -0.530096 -0.272388 
 -0.532484 -0.529514 -0.287313 
 -0.531210 -0.529514 -0.313433 
 -0.531210 -0.528933 -0.347015 
 -0.531210 -0.528351 -0.369403 
 -0.529936 -0.528351 -0.399254 
 -0.529936 -0.527770 -0.429104 
 -0.529936 -0.527188 -0.429104 
 -0.528662 -0.527188 -0.429104 
 -0.528662 -0.526607 -0.410448 
 -0.528662 -0.526025 -0.399254 
 -0.528662 -0.525443 -0.365672 
 -0.527389 -0.525443 -0.369403 
 -0.527389 -0.524862 -0.347015 
 -0.527389 -0.524280 -0.309701 
 -0.526115 -0.524280 -0.313433 
 -0.526115 -0.523699 -0.287313 
 -0.526115 -0.523117 -0.257463 
 -0.524841 -0.523117 -0.257463 
 -0.524841 -0.522536 -0.216418 
 -0.524841 -0.521954 -0.212687 
 -0.523567 -0.521954 -0.242537 
 -0.523567 -0.521372 -0.261194 
 -0.523567 -0.520791 -0.261194 
 -0.523567 -0.520209 -0.257463 
 -0.522293 -0.520209 -0.287313 
 -0.522293 -0.519628 -0.268657 
 -0.522293 -0.519046 -0.235075 
 -0.521019 -0.519046 -0.257463 
 -0.521019 -0.518465 -0.227612 
 -0.521019 -0.517883 -0.197761 
 -0.519745 -0.517883 -0.220149 
 -0.519745 -0.517302 -0.235075 
 -0.519745 -0.516720 -0.261194 
 -0.518471 -0.516720 -0.287313 
 -0.518471 -0.516138 -0.302239 
 -0.518471 -0.515557 -0.309701 
 -0.517197 -0.515557 -0.332090 
 -0.517197 -0.514975 -0.328358 
 -0.517197 -0.514394 -0.320896 
 -0.517197 -0.513812 -0.302239 
 -0.515924 -0.513812 -0.324627 
 -0.515924 -0.513231 -0.324627 
 -0.515924 -0.512649 -0.347015 
 -0.514650 -0.512649 -0.373134 
 -0.514650 -0.512067 -0.388060 
 -0.514650 -0.511486 -0.402985 
 -0.513376 -0.511486 -0.417910 
 -0.513376 -0.510904 -0.406716 
 -0.513376 -0.510323 -0.365672 
 -0.512102 -0.510323 -0.358209 
 -0.512102 -0.509741 -0.328358 
 -0.512102 -0.509160 -0.287313 
 -0.512102 -0.508578 -0.268657 
 -0.510828 -0.508578 -0.272388 
 -0.510828 -0.507997 -0.264925 
 -0.510828 -0.507415 -0.264925 
 -0.509554 -0.507415 -0.291045 
 -0.509554 -0.506833 -0.302239 
 -0.509554 -0.506252 -0.302239 
 -0.508280 -0.506252 -0.320896 
 -0.508280 -0.505670 -0.320896 
 -0.508280 -0.505089 -0.328358 
 -0.507006 -0.505089 -0.335821 
 -0.507006 -0.504507 -0.324627 
 -0.507006 -0.503926 -0.305970 
 -0.505732 -0.503926 -0.287313 
 -0.505732 -0.503344 -0.272388 
 -0.505732 -0.502762 -0.257463 
 -0.505732 -0.502181 -0.250000 
 -0.504459 -0.502181 -0.223881 
 -0.504459 -0.501599 -0.212687 
 -0.504459 -0.501018 -0.205224 
 -0.503185 -0.501018 -0.175373 
 -0.503185 -0.500436 -0.156716 
 -0.503185 -0.499855 -0.145522 
 -0.501911 -0.499855 -0.119403 
 -0.501911 -0.499273 -0.104478 
 -0.501911 -0.498691 -0.089552 
 -0.500637 -0.498691 -0.055970 
 -0.500637 -0.498110 -0.022388 
 -0.500637 -0.497528 0.000000 
 -0.500637 -0.496947 0.033582 
 -0.499363 -0.496947 0.022388 
 -0.499363 -0.496365 0.029851 
 -0.499363 -0.495784 0.033582 
 -0.498089 -0.495784 0.003731 
 -0.498089 -0.495202 -0.014925 
 -0.498089 -0.494621 -0.029851 
 -0.496815 -0.494621 -0.055970 
 -0.496815 -0.494039 -0.070896 
 -0.496815 -0.493457 -0.070896 
 -0.495541 -0.493457 -0.097015 
 -0.495541 -0.492876 -0.085821 
 -0.495541 -0.492294 -0.070896 
 -0.495541 -0.491713 -0.059701 
 -0.494268 -0.491713 -0.085821 
 -0.494268 -0.491131 -0.082090 
 -0.494268 -0.490550 -0.059701 
 -0.492994 -0.490550 -0.074627 
 -0.492994 -0.489968 -0.070896 
 -0.492994 -0.489386 -0.078358 
 -0.491720 -0.489386 -0.100746 
 -0.491720 -0.488805 -0.108209 
 -0.491720 -0.488223 -0.123134 
 -0.490446 -0.488223 -0.134328 
 -0.490446 -0.487642 -0.115672 
 -0.490446 -0.487060 -0.085821 
 -0.489172 -0.486479 -0.055970 
 -0.489172 -0.485897 -0.041045 
 -0.489172 -0.485315 -0.048507 
 -0.487898 -0.485315 -0.074627 
 -0.487898 -0.484734 -0.085821 
 -0.487898 -0.484152 -0.074627 
 -0.486624 -0.484152 -0.085821 
 -0.486624 -0.483571 -0.067164 
 -0.486624 -0.482989 -0.029851 
 -0.485350 -0.482989 -0.044776 
 -0.485350 -0.482408 -0.026119 
 -0.485350 -0.481826 -0.011194 
 -0.484076 -0.481826 -0.029851 
 -0.484076 -0.481245 -0.007463 
 -0.484076 -0.480663 0.026119 
 -0.484076 -0.480081 0.048507 
 -0.482803 -0.480081 0.033582 
 -0.482803 -0.479500 0.070896 
 -0.482803 -0.478918 0.100746 
 -0.481529 -0.478918 0.104478 
 -0.481529 -0.478337 0.130597 
 -0.481529 -0.477755 0.167910 
 -0.480255 -0.477755 0.171642 
 -0.480255 -0.477174 0.197761 
 -0.480255 -0.476592 0.216418 
 -0.478981 -0.476592 0.190299 
 -0.478981 -0.476010 0.164179 
 -0.478981 -0.475429 0.108209 
 -0.478981 -0.474847 0.097015 
 -0.477707 -0.474847 0.055970 
 -0.477707 -0.474266 0.059701 
 -0.477707 -0.473684 0.041045 
 -0.476433 -0.473684 0.022388 
 -0.476433 -0.473103 0.037313 
 -0.476433 -0.472521 0.029851 
 -0.475159 -0.472521 0.014925 
 -0.475159 -0.471940 0.052239 
 -0.475159 -0.471358 0.082090 
 -0.473885 -0.471358 0.074627 
 -0.473885 -0.470776 0.119403 
 -0.473885 -0.470195 0.152985 
 -0.473885 -0.469613 0.186567 
 -0.472611 -0.469613 0.175373 
 -0.472611 -0.469032 0.212687 
 -0.472611 -0.468450 0.227612 
 -0.471338 -0.468450 0.197761 
 -0.471338 -0.467869 0.231343 
 -0.471338 -0.467287 0.261194 
 -0.470064 -0.467287 0.242537 
 -0.470064 -0.466705 0.268657 
 -0.470064 -0.466124 0.283582 
 -0.468790 -0.466124 0.253731 
 -0.468790 -0.465542 0.272388 
 -0.468790 -0.464961 0.268657 
 -0.468790 -0.464379 0.242537 
 -0.467516 -0.464379 0.246269 
 -0.467516 -0.463798 0.227612 
 -0.467516 -0.463216 0.194030 
 -0.466242 -0.463216 0.205224 
 -0.466242 -0.462634 0.186567 
 -0.466242 -0.462053 0.149254 
 -0.464968 -0.462053 0.156716 
 -0.464968 -0.461471 0.134328 
 -0.464968 -0.460890 0.115672 
 -0.463694 -0.460890 0.138060 
 -0.463694 -0.460308 0.141791 
 -0.463694 -0.459727 0.149254 
 -0.463694 -0.459145 0.130597 
 -0.462420 -0.459145 0.134328 
 -0.462420 -0.458564 0.104478 
 -0.462420 -0.457982 0.063433 
 -0.461146 -0.457982 0.059701 
 -0.461146 -0.457400 0.041045 
 -0.461146 -0.456819 0.029851 
 -0.459873 -0.456819 0.052239 
 -0.459873 -0.456237 0.055970 
 -0.459873 -0.455656 0.055970 
 -0.458599 -0.455656 0.085821 
 -0.458599 -0.455074 0.085821 
 -0.458599 -0.454493 0.085821 
 -0.458599 -0.453911 0.074627 
 -0.457325 -0.453911 0.078358 
 -0.457325 -0.453329 0.037313 
 -0.457325 -0.452748 0.007463 
 -0.456051 -0.452748 0.007463 
 -0.456051 -0.452166 -0.033582 
 -0.456051 -0.451585 -0.052239 
 -0.454777 -0.451585 -0.044776 
 -0.454777 -0.451003 -0.037313 
 -0.454777 -0.450422 -0.014925 
 -0.453503 -0.450422 0.014925 
 -0.453503 -0.449840 0.033582 
 -0.453503 -0.449259 0.059701 
 -0.453503 -0.448677 0.059701 
 -0.452229 -0.448677 0.059701 
 -0.452229 -0.448095 0.014925 
 -0.452229 -0.447514 -0.014925 
 -0.450955 -0.447514 -0.022388 
 -0.450955 -0.446932 -0.067164 
 -0.450955 -0.446351 -0.097015 
 -0.449682 -0.446351 -0.093284 
 -0.449682 -0.445769 -0.097015 
 -0.449682 -0.445188 -0.085821 
 -0.448408 -0.445188 -0.059701 
 -0.448408 -0.444606 -0.041045 
 -0.448408 -0.444024 -0.029851 
 -0.448408 -0.443443 -0.052239 
 -0.447134 -0.443443 -0.044776 
 -0.447134 -0.442861 -0.070896 
 -0.447134 -0.442280 -0.097015 
 -0.445860 -0.442280 -0.097015 
 -0.445860 -0.441698 -0.138060 
 -0.445860 -0.441117 -0.164179 
 -0.444586 -0.441117 -0.160448 
 -0.444586 -0.440535 -0.197761 
 -0.444586 -0.439953 -0.212687 
 -0.443312 -0.439953 -0.205224 
 -0.443312 -0.439372 -0.186567 
 -0.443312 -0.438790 -0.171642 
 -0.443312 -0.438209 -0.156716 
 -0.442038 -0.438209 -0.134328 
 -0.442038 -0.437627 -0.134328 
 -0.442038 -0.437046 -0.115672 
 -0.440764 -0.437046 -0.100746 
 -0.440764 -0.436464 -0.078358 
 -0.440764 -0.435883 -0.037313 
 -0.439490 -0.435883 -0.033582 
 -0.439490 -0.435301 -0.007463 
 -0.439490 -0.434719 0.033582 
 -0.438217 -0.434719 0.037313 
 -0.438217 -0.434138 0.067164 
 -0.438217 -0.433556 0.093284 
 -0.438217 -0.432975 0.123134 
 -0.436943 -0.432975 0.134328 
 -0.436943 -0.432393 0.156716 
 -0.436943 -0.431812 0.167910 
 -0.435669 -0.431812 0.186567 
 -0.435669 -0.431230 0.179104 
 -0.435669 -0.430648 0.152985 
 -0.434395 -0.430648 0.179104 
 -0.434395 -0.430067 0.160448 
 -0.434395 -0.429485 0.141791 
 -0.433121 -0.429485 0.171642 
 -0.433121 -0.428904 0.175373 
 -0.433121 -0.428322 0.179104 
 -0.433121 -0.427741 0.186567 
 -0.431847 -0.427741 0.167910 
 -0.431847 -0.427159 0.145522 
 -0.431847 -0.426577 0.119403 
 -0.430573 -0.426577 0.085821 
 -0.430573 -0.425996 0.055970 
 -0.430573 -0.425414 0.044776 
 -0.429299 -0.425414 0.022388 
 -0.429299 -0.424833 0.003731 
 -0.429299 -0.424251 -0.014925 
 -0.428025 -0.424251 -0.033582 
 -0.428025 -0.423670 -0.052239 
 -0.428025 -0.423088 -0.074627 
 -0.428025 -0.422507 -0.089552 
 -0.426752 -0.422507 -0.108209 
 -0.426752 -0.421925 -0.123134 
 -0.426752 -0.421343 -0.126866 
 -0.425478 -0.421343 -0.141791 
 -0.425478 -0.420762 -0.145522 
 -0.425478 -0.420180 -0.141791 
 -0.424204 -0.420180 -0.164179 
 -0.424204 -0.419599 -0.171642 
 -0.424204 -0.419017 -0.182836 
 -0.422930 -0.419017 -0.205224 
 -0.422930 -0.418436 -0.220149 
 -0.422930 -0.417854 -0.227612 
 -0.421656 -0.417272 -0.257463 
 -0.421656 -0.416691 -0.268657 
 -0.421656 -0.416109 -0.287313 
 -0.420382 -0.416109 -0.294776 
 -0.420382 -0.415528 -0.305970 
 -0.420382 -0.414946 -0.317164 
 -0.419108 -0.414946 -0.324627 
 -0.419108 -0.414365 -0.343284 
 -0.419108 -0.413783 -0.343284 
 -0.417834 -0.413783 -0.361940 
 -0.417834 -0.413202 -0.373134 
 -0.417834 -0.412620 -0.380597 
 -0.416561 -0.412038 -0.395522 
 -0.416561 -0.411457 -0.399254 
 -0.416561 -0.410875 -0.399254 
 -0.415287 -0.410875 -0.399254 
 -0.415287 -0.410294 -0.406716 
 -0.415287 -0.409712 -0.414179 
 -0.414013 -0.409712 -0.402985 
 -0.414013 -0.409131 -0.406716 
 -0.414013 -0.408549 -0.406716 
 -0.412739 -0.408549 -0.395522 
 -0.412739 -0.407967 -0.395522 
 -0.412739 -0.407386 -0.399254 
 -0.411465 -0.407386 -0.391791 
 -0.411465 -0.406804 -0.395522 
 -0.411465 -0.406223 -0.402985 
 -0.411465 -0.405641 -0.406716 
 -0.410191 -0.405641 -0.391791 
 -0.410191 -0.405060 -0.380597 
 -0.410191 -0.404478 -0.369403 
 -0.408917 -0.404478 -0.350746 
 -0.408917 -0.403896 -0.350746 
 -0.408917 -0.403315 -0.354478 
 -0.407643 -0.403315 -0.335821 
 -0.407643 -0.402733 -0.339552 
 -0.407643 -0.402152 -0.317164 
 -0.406369 -0.402152 -0.298507 
 -0.406369 -0.401570 -0.283582 
 -0.406369 -0.400989 -0.276119 
 -0.406369 -0.400407 -0.272388 
 -0.405096 -0.400407 -0.250000 
 -0.405096 -0.399826 -0.261194 
 -0.405096 -0.399244 -0.276119 
 -0.403822 -0.399244 -0.276119 
 -0.403822 -0.398662 -0.302239 
 -0.403822 -0.398081 -0.324627 
 -0.402548 -0.398081 -0.324627 
 -0.402548 -0.397499 -0.309701 
 -0.402548 -0.396918 -0.305970 
 -0.401274 -0.396918 -0.305970 
 -0.401274 -0.396336 -0.317164 
 -0.401274 -0.395755 -0.339552 
 -0.401274 -0.395173 -0.354478 
 -0.400000 -0.395173 -0.347015 
 -0.400000 -0.394591 -0.369403 
 -0.400000 -0.394010 -0.376866 
 -0.398726 -0.394010 -0.373134 
 -0.398726 -0.393428 -0.388060 
 -0.398726 -0.392847 -0.402985 
 -0.397452 -0.392847 -0.395522 
 -0.397452 -0.392265 -0.414179 
 -0.397452 -0.391684 -0.425373 
 -0.396178 -0.391684 -0.417910 
 -0.396178 -0.391102 -0.429104 
 -0.396178 -0.390521 -0.414179 
 -0.396178 -0.389939 -0.384328 
 -0.394904 -0.389939 -0.380597 
 -0.394904 -0.389357 -0.365672 
 -0.394904 -0.388776 -0.343284 
 -0.393631 -0.388776 -0.317164 
 -0.393631 -0.388194 -0.291045 
 -0.393631 -0.387613 -0.268657 
 -0.392357 -0.387613 -0.253731 
 -0.392357 -0.387031 -0.220149 
 -0.392357 -0.386450 -0.201493 
 -0.391083 -0.386450 -0.186567 
 -0.391083 -0.385868 -0.160448 
 -0.391083 -0.385286 -0.145522 
 -0.389809 -0.385286 -0.130597 
 -0.389809 -0.384705 -0.111940 
 -0.389809 -0.384123 -0.104478 
 -0.389809 -0.383542 -0.119403 
 -0.388535 -0.383542 -0.111940 
 -0.388535 -0.382960 -0.130597 
 -0.388535 -0.382379 -0.152985 
 -0.387261 -0.382379 -0.156716 
 -0.387261 -0.381797 -0.182836 
 -0.387261 -0.381215 -0.212687 
 -0.385987 -0.381215 -0.212687 
 -0.385987 -0.380634 -0.235075 
 -0.385987 -0.380052 -0.268657 
 -0.384713 -0.380052 -0.268657 
 -0.384713 -0.379471 -0.283582 
 -0.384713 -0.378889 -0.298507 
 -0.384713 -0.378308 -0.317164 
 -0.383439 -0.378308 -0.305970 
 -0.383439 -0.377726 -0.309701 
 -0.383439 -0.377145 -0.324627 
 -0.382166 -0.377145 -0.309701 
 -0.382166 -0.376563 -0.324627 
 -0.382166 -0.375981 -0.335821 
 -0.380892 -0.375981 -0.332090 
 -0.380892 -0.375400 -0.343284 
 -0.380892 -0.374818 -0.358209 
 -0.379618 -0.374818 -0.343284 
 -0.379618 -0.374237 -0.343284 
 -0.379618 -0.373655 -0.320896 
 -0.378344 -0.373655 -0.317164 
 -0.378344 -0.373074 -0.302239 
 -0.378344 -0.372492 -0.276119 
 -0.378344 -0.371910 -0.264925 
 -0.377070 -0.371910 -0.257463 
 -0.377070 -0.371329 -0.235075 
 -0.377070 -0.370747 -0.216418 
 -0.375796 -0.370747 -0.201493 
 -0.375796 -0.370166 -0.179104 
 -0.375796 -0.369584 -0.164179 
 -0.374522 -0.369584 -0.141791 
 -0.374522 -0.369003 -0.134328 
 -0.374522 -0.368421 -0.115672 
 -0.373248 -0.368421 -0.093284 
 -0.373248 -0.367839 -0.078358 
 -0.373248 -0.367258 -0.067164 
 -0.373248 -0.366676 -0.055970 
 -0.371975 -0.366676 -0.041045 
 -0.371975 -0.366095 -0.007463 
 -0.371975 -0.365513 0.022388 
 -0.370701 -0.365513 0.044776 
 -0.370701 -0.364932 0.085821 
 -0.370701 -0.364350 0.093284 
 -0.369427 -0.364350 0.104478 
 -0.369427 -0.363769 0.082090 
 -0.369427 -0.363187 0.059701 
 -0.368153 -0.363187 0.059701 
 -0.368153 -0.362605 0.026119 
 -0.368153 -0.362024 0.003731 
 -0.366879 -0.362024 0.000000 
 -0.366879 -0.361442 -0.022388 
 -0.366879 -0.360861 -0.055970 
 -0.366879 -0.360279 -0.070896 
 -0.365605 -0.360279 -0.052239 
 -0.365605 -0.359698 -0.074627 
 -0.365605 -0.359116 -0.089552 
 -0.364331 -0.359116 -0.074627 
 -0.364331 -0.358534 -0.108209 
 -0.364331 -0.357953 -0.130597 
 -0.363057 -0.357953 -0.134328 
 -0.363057 -0.357371 -0.164179 
 -0.363057 -0.356790 -0.179104 
 -0.361783 -0.356790 -0.190299 
 -0.361783 -0.356208 -0.212687 
 -0.361783 -0.355627 -0.238806 
 -0.361783 -0.355045 -0.279851 
 -0.360510 -0.355045 -0.287313 
 -0.360510 -0.354464 -0.313433 
 -0.360510 -0.353882 -0.343284 
 -0.359236 -0.353882 -0.343284 
 -0.359236 -0.353300 -0.369403 
 -0.359236 -0.352719 -0.391791 
 -0.357962 -0.352719 -0.384328 
 -0.357962 -0.352137 -0.399254 
 -0.357962 -0.351556 -0.399254 
 -0.356688 -0.351556 -0.391791 
 -0.356688 -0.350974 -0.380597 
 -0.356688 -0.350393 -0.380597 
 -0.355414 -0.350393 -0.365672 
 -0.355414 -0.349811 -0.358209 
 -0.355414 -0.349229 -0.332090 
 -0.355414 -0.348648 -0.302239 
 -0.354140 -0.348648 -0.283582 
 -0.354140 -0.348066 -0.268657 
 -0.354140 -0.347485 -0.253731 
 -0.352866 -0.347485 -0.227612 
 -0.352866 -0.346903 -0.235075 
 -0.352866 -0.346322 -0.246269 
 -0.351592 -0.346322 -0.220149 
 -0.351592 -0.345740 -0.220149 
 -0.351592 -0.345158 -0.201493 
 -0.350318 -0.345158 -0.175373 
 -0.350318 -0.344577 -0.160448 
 -0.350318 -0.343995 -0.130597 
 -0.349045 -0.343414 -0.078358 
 -0.349045 -0.342832 -0.063433 
 -0.349045 -0.342251 -0.078358 
 -0.347771 -0.342251 -0.104478 
 -0.347771 -0.341669 -0.123134 
 -0.347771 -0.341088 -0.160448 
 -0.346497 -0.341088 -0.179104 
 -0.346497 -0.340506 -0.201493 
 -0.346497 -0.339924 -0.231343 
 -0.345223 -0.339924 -0.246269 
 -0.345223 -0.339343 -0.264925 
 -0.345223 -0.338761 -0.294776 
 -0.343949 -0.338761 -0.305970 
 -0.343949 -0.338180 -0.320896 
 -0.343949 -0.337598 -0.343284 
 -0.343949 -0.337017 -0.358209 
 -0.342675 -0.337017 -0.350746 
 -0.342675 -0.336435 -0.373134 
 -0.342675 -0.335853 -0.373134 
 -0.341401 -0.335853 -0.354478 
 -0.341401 -0.335272 -0.350746 
 -0.341401 -0.334690 -0.339552 
 -0.340127 -0.334690 -0.324627 
 -0.340127 -0.334109 -0.309701 
 -0.340127 -0.333527 -0.291045 
 -0.338854 -0.333527 -0.272388 
 -0.338854 -0.332946 -0.268657 
 -0.338854 -0.332364 -0.279851 
 -0.337580 -0.332364 -0.253731 
 -0.337580 -0.331782 -0.261194 
 -0.337580 -0.331201 -0.276119 
 -0.337580 -0.330619 -0.261194 
 -0.336306 -0.330619 -0.242537 
 -0.336306 -0.330038 -0.227612 
 -0.336306 -0.329456 -0.231343 
 -0.335032 -0.329456 -0.205224 
 -0.335032 -0.328875 -0.220149 
 -0.335032 -0.328293 -0.212687 
 -0.333758 -0.328293 -0.190299 
 -0.333758 -0.327712 -0.149254 
 -0.333758 -0.327130 -0.119403 
 -0.332484 -0.327130 -0.108209 
 -0.332484 -0.326548 -0.067164 
 -0.332484 -0.325967 -0.041045 
 -0.331210 -0.325967 -0.026119 
 -0.331210 -0.325385 0.007463 
 -0.331210 -0.324804 0.052239 
 -0.331210 -0.324222 0.074627 
 -0.329936 -0.324222 0.085821 
 -0.329936 -0.323641 0.048507 
 -0.329936 -0.323059 0.018657 
 -0.328662 -0.323059 0.003731 
 -0.328662 -0.322477 -0.037313 
 -0.328662 -0.321896 -0.055970 
 -0.327389 -0.321896 -0.070896 
 -0.327389 -0.321314 -0.100746 
 -0.327389 -0.320733 -0.123134 
 -0.326115 -0.320733 -0.134328 
 -0.326115 -0.320151 -0.160448 
 -0.326115 -0.319570 -0.179104 
 -0.324841 -0.318988 -0.201493 
 -0.324841 -0.318407 -0.208955 
 -0.324841 -0.317825 -0.208955 
 -0.323567 -0.317825 -0.179104 
 -0.323567 -0.317243 -0.179104 
 -0.323567 -0.316662 -0.182836 
 -0.322293 -0.316662 -0.175373 
 -0.322293 -0.316080 -0.201493 
 -0.322293 -0.315499 -0.227612 
 -0.321019 -0.315499 -0.235075 
 -0.321019 -0.314917 -0.253731 
 -0.321019 -0.314336 -0.261194 
 -0.319745 -0.314336 -0.246269 
 -0.319745 -0.313754 -0.246269 
 -0.319745 -0.313172 -0.238806 
 -0.319745 -0.312591 -0.216418 
 -0.318471 -0.312591 -0.201493 
 -0.318471 -0.312009 -0.190299 
 -0.318471 -0.311428 -0.182836 
 -0.317197 -0.311428 -0.167910 
 -0.317197 -0.310846 -0.179104 
 -0.317197 -0.310265 -0.201493 
 -0.315924 -0.310265 -0.194030 
 -0.315924 -0.309683 -0.220149 
 -0.315924 -0.309101 -0.257463 
 -0.314650 -0.309101 -0.246269 
 -0.314650 -0.308520 -0.257463 
 -0.314650 -0.307938 -0.272388 
 -0.313376 -0.307938 -0.250000 
 -0.313376 -0.307357 -0.261194 
 -0.313376 -0.306775 -0.264925 
 -0.313376 -0.306194 -0.257463 
 -0.312102 -0.306194 -0.235075 
 -0.312102 -0.305612 -0.231343 
 -0.312102 -0.305031 -0.220149 
 -0.310828 -0.305031 -0.201493 
 -0.310828 -0.304449 -0.190299 
 -0.310828 -0.303867 -0.175373 
 -0.309554 -0.303867 -0.160448 
 -0.309554 -0.303286 -0.152985 
 -0.309554 -0.302704 -0.175373 
 -0.308280 -0.302704 -0.156716 
 -0.308280 -0.302123 -0.167910 
 -0.308280 -0.301541 -0.175373 
 -0.307006 -0.301541 -0.152985 
 -0.307006 -0.300960 -0.149254 
 -0.307006 -0.300378 -0.145522 
 -0.307006 -0.299796 -0.141791 
 -0.305732 -0.299796 -0.119403 
 -0.305732 -0.299215 -0.104478 
 -0.305732 -0.298633 -0.100746 
 -0.304459 -0.298633 -0.074627 
 -0.304459 -0.298052 -0.067164 
 -0.304459 -0.297470 -0.052239 
 -0.303185 -0.297470 -0.029851 
 -0.303185 -0.296889 -0.018657 
 -0.303185 -0.296307 0.007463 
 -0.301911 -0.296307 0.026119 
 -0.301911 -0.295726 0.041045 
 -0.301911 -0.295144 0.063433 
 -0.300637 -0.295144 0.052239 
 -0.300637 -0.294562 0.044776 
 -0.300637 -0.293981 0.041045 
 -0.300637 -0.293399 0.041045 
 -0.299363 -0.293399 0.007463 
 -0.299363 -0.292818 0.003731 
 -0.299363 -0.292236 0.007463 
 -0.298089 -0.292236 -0.014925 
 -0.298089 -0.291655 -0.007463 
 -0.298089 -0.291073 0.003731 
 -0.296815 -0.291073 -0.018657 
 -0.296815 -0.290491 0.000000 
 -0.296815 -0.289910 -0.011194 
 -0.295541 -0.289910 -0.029851 
 -0.295541 -0.289328 -0.055970 
 -0.295541 -0.288747 -0.100746 
 -0.294268 -0.288747 -0.104478 
 -0.294268 -0.288165 -0.138060 
 -0.294268 -0.287584 -0.182836 
 -0.294268 -0.287002 -0.212687 
 -0.292994 -0.287002 -0.216418 
 -0.292994 -0.286420 -0.250000 
 -0.292994 -0.285839 -0.276119 
 -0.291720 -0.285839 -0.279851 
 -0.291720 -0.285257 -0.317164 
 -0.291720 -0.284676 -0.332090 
 -0.290446 -0.284676 -0.339552 
 -0.290446 -0.284094 -0.361940 
 -0.290446 -0.283513 -0.361940 
 -0.289172 -0.283513 -0.388060 
 -0.289172 -0.282931 -0.376866 
 -0.289172 -0.282350 -0.365672 
 -0.287898 -0.282350 -0.391791 
 -0.287898 -0.281768 -0.391791 
 -0.287898 -0.281186 -0.391791 
 -0.287898 -0.280605 -0.384328 
 -0.286624 -0.280605 -0.402985 
 -0.286624 -0.280023 -0.388060 
 -0.286624 -0.279442 -0.376866 
 -0.285350 -0.279442 -0.395522 
 -0.285350 -0.278860 -0.395522 
 -0.285350 -0.278279 -0.388060 
 -0.284076 -0.278279 -0.410448 
 -0.284076 -0.277697 -0.388060 
 -0.284076 -0.277115 -0.399254 
 -0.282803 -0.277115 -0.406716 
 -0.282803 -0.276534 -0.436567 
 -0.282803 -0.275952 -0.458955 
 -0.282803 -0.275371 -0.492537 
 -0.281529 -0.275371 -0.492537 
 -0.281529 -0.274789 -0.514925 
 -0.281529 -0.274208 -0.548507 
 -0.280255 -0.274208 -0.548507 
 -0.280255 -0.273626 -0.570896 
 -0.280255 -0.273044 -0.589552 
 -0.278981 -0.273044 -0.600746 
 -0.278981 -0.272463 -0.604478 
 -0.278981 -0.271881 -0.600746 
 -0.277707 -0.271881 -0.611940 
 -0.277707 -0.271300 -0.608209 
 -0.277707 -0.270718 -0.604478 
 -0.276433 -0.270718 -0.619403 
 -0.276433 -0.270137 -0.615672 
 -0.276433 -0.269555 -0.608209 
 -0.276433 -0.268974 -0.582090 
 -0.275159 -0.268974 -0.593284 
 -0.275159 -0.268392 -0.578358 
 -0.275159 -0.267810 -0.555970 
 -0.273885 -0.267810 -0.567164 
 -0.273885 -0.267229 -0.563433 
 -0.273885 -0.266647 -0.600746 
 -0.272611 -0.266647 -0.611940 
 -0.272611 -0.266066 -0.630597 
 -0.272611 -0.265484 -0.649254 
 -0.271338 -0.265484 -0.664179 
 -0.271338 -0.264903 -0.671642 
 -0.271338 -0.264321 -0.690299 
 -0.270064 -0.264321 -0.701493 
 -0.270064 -0.263739 -0.712687 
 -0.270064 -0.263158 -0.735075 
 -0.270064 -0.262576 -0.738806 
 -0.268790 -0.262576 -0.750000 
 -0.268790 -0.261995 -0.750000 
 -0.268790 -0.261413 -0.750000 
 -0.267516 -0.261413 -0.764925 
 -0.267516 -0.260832 -0.764925 
 -0.267516 -0.260250 -0.761194 
 -0.266242 -0.260250 -0.772388 
 -0.266242 -0.259669 -0.779851 
 -0.266242 -0.259087 -0.791045 
 -0.264968 -0.259087 -0.802239 
 -0.264968 -0.258505 -0.809701 
 -0.264968 -0.257924 -0.813433 
 -0.263694 -0.257924 -0.824627 
 -0.263694 -0.257342 -0.817164 
 -0.263694 -0.256761 -0.809701 
 -0.263694 -0.256179 -0.813433 
 -0.262420 -0.256179 -0.820896 
 -0.262420 -0.255598 -0.835821 
 -0.262420 -0.255016 -0.847015 
 -0.261146 -0.255016 -0.847015 
 -0.261146 -0.254434 -0.850746 
 -0.261146 -0.253853 -0.847015 
 -0.259873 -0.253853 -0.858209 
 -0.259873 -0.253271 -0.847015 
 -0.259873 -0.252690 -0.843284 
 -0.258599 -0.252690 -0.850746 
 -0.258599 -0.252108 -0.854478 
 -0.258599 -0.251527 -0.854478 
 -0.257325 -0.251527 -0.861940 
 -0.257325 -0.250945 -0.865672 
 -0.257325 -0.250363 -0.869403 
 -0.257325 -0.249782 -0.873134 
 -0.256051 -0.249782 -0.880597 
 -0.256051 -0.249200 -0.884328 
 -0.256051 -0.248619 -0.884328 
 -0.254777 -0.248619 -0.891791 
 -0.254777 -0.248037 -0.902985 
 -0.254777 -0.247456 -0.902985 
 -0.253503 -0.247456 -0.910448 
 -0.253503 -0.246874 -0.910448 
 -0.253503 -0.246293 -0.914179 
 -0.252229 -0.246293 -0.921642 
 -0.252229 -0.245711 -0.925373 
 -0.252229 -0.245129 -0.925373 
 -0.250955 -0.245129 -0.925373 
 -0.250955 -0.244548 -0.929104 
 -0.250955 -0.243966 -0.929104 
 -0.250955 -0.243385 -0.929104 
 -0.249682 -0.243385 -0.929104 
 -0.249682 -0.242803 -0.932836 
 -0.249682 -0.242222 -0.936567 
 -0.248408 -0.242222 -0.932836 
 -0.248408 -0.241640 -0.936567 
 -0.248408 -0.241058 -0.940299 
 -0.247134 -0.241058 -0.936567 
 -0.247134 -0.240477 -0.940299 
 -0.247134 -0.239895 -0.940299 
 -0.245860 -0.239895 -0.940299 
 -0.245860 -0.239314 -0.940299 
 -0.245860 -0.238732 -0.940299 
 -0.244586 -0.238732 -0.940299 
 -0.244586 -0.238151 -0.940299 
 -0.244586 -0.237569 -0.940299 
 -0.244586 -0.236987 -0.940299 
 -0.243312 -0.236987 -0.940299 
 -0.243312 -0.236406 -0.940299 
 -0.243312 -0.235824 -0.940299 
 -0.242038 -0.235824 -0.940299 
 -0.242038 -0.235243 -0.940299 
 -0.242038 -0.234661 -0.940299 
 -0.240764 -0.234661 -0.940299 
 -0.240764 -0.234080 -0.940299 
 -0.240764 -0.233498 -0.944030 
 -0.239490 -0.233498 -0.944030 
 -0.239490 -0.232917 -0.947761 
 -0.239490 -0.232335 -0.947761 
 -0.238217 -0.232335 -0.947761 
 -0.238217 -0.231753 -0.947761 
 -0.238217 -0.231172 -0.947761 
 -0.238217 -0.230590 -0.947761 
 -0.236943 -0.230590 -0.947761 
 -0.236943 -0.230009 -0.947761 
 -0.236943 -0.229427 -0.947761 
 -0.235669 -0.229427 -0.947761 
 -0.235669 -0.228846 -0.947761 
 -0.235669 -0.228264 -0.951493 
 -0.234395 -0.228264 -0.947761 
 -0.234395 -0.227682 -0.951493 
 -0.234395 -0.227101 -0.951493 
 -0.233121 -0.227101 -0.947761 
 -0.233121 -0.226519 -0.951493 
 -0.233121 -0.225938 -0.951493 
 -0.231847 -0.225938 -0.951493 
 -0.231847 -0.225356 -0.951493 
 -0.231847 -0.224775 -0.951493 
 -0.230573 -0.224193 -0.951493 
 -0.230573 -0.223612 -0.955224 
 -0.230573 -0.223030 -0.958955 
 -0.229299 -0.223030 -0.958955 
 -0.229299 -0.222448 -0.958955 
 -0.229299 -0.221867 -0.958955 
 -0.228025 -0.221867 -0.955224 
 -0.228025 -0.221285 -0.951493 
 -0.228025 -0.220704 -0.951493 
 -0.226752 -0.220704 -0.940299 
 -0.226752 -0.220122 -0.940299 
 -0.226752 -0.219541 -0.940299 
 -0.225478 -0.219541 -0.929104 
 -0.225478 -0.218959 -0.921642 
 -0.225478 -0.218377 -0.906716 
 -0.224204 -0.217796 -0.899254 
 -0.224204 -0.217214 -0.917910 
 -0.224204 -0.216633 -0.902985 
 -0.222930 -0.216633 -0.899254 
 -0.222930 -0.216051 -0.873134 
 -0.222930 -0.215470 -0.839552 
 -0.221656 -0.215470 -0.832090 
 -0.221656 -0.214888 -0.813433 
 -0.221656 -0.214306 -0.802239 
 -0.220382 -0.214306 -0.794776 
 -0.220382 -0.213725 -0.813433 
 -0.220382 -0.213143 -0.850746 
 -0.219108 -0.213143 -0.843284 
 -0.219108 -0.212562 -0.861940 
 -0.219108 -0.211980 -0.888060 
 -0.217834 -0.211980 -0.880597 
 -0.217834 -0.211399 -0.899254 
 -0.217834 -0.210817 -0.921642 
 -0.217834 -0.210236 -0.921642 
 -0.216561 -0.210236 -0.921642 
 -0.216561 -0.209654 -0.921642 
 -0.216561 -0.209072 -0.902985 
 -0.215287 -0.209072 -0.895522 
 -0.215287 -0.208491 -0.861940 
 -0.215287 -0.207909 -0.832090 
 -0.214013 -0.207909 -0.832090 
 -0.214013 -0.207328 -0.813433 
 -0.214013 -0.206746 -0.779851 
 -0.212739 -0.206746 -0.779851 
 -0.212739 -0.206165 -0.753731 
 -0.212739 -0.205583 -0.761194 
 -0.211465 -0.205583 -0.746269 
 -0.211465 -0.205001 -0.761194 
 -0.211465 -0.204420 -0.776119 
 -0.211465 -0.203838 -0.783582 
 -0.210191 -0.203838 -0.761194 
 -0.210191 -0.203257 -0.768657 
 -0.210191 -0.202675 -0.783582 
 -0.208917 -0.202675 -0.764925 
 -0.208917 -0.202094 -0.776119 
 -0.208917 -0.201512 -0.753731 
 -0.207643 -0.201512 -0.742537 
 -0.207643 -0.200931 -0.705224 
 -0.207643 -0.200349 -0.679104 
 -0.206369 -0.200349 -0.671642 
 -0.206369 -0.199767 -0.649254 
 -0.206369 -0.199186 -0.645522 
 -0.205096 -0.199186 -0.630597 
 -0.205096 -0.198604 -0.641791 
 -0.205096 -0.198023 -0.667910 
 -0.205096 -0.197441 -0.682836 
 -0.203822 -0.197441 -0.664179 
 -0.203822 -0.196860 -0.660448 
 -0.203822 -0.196278 -0.649254 
 -0.202548 -0.196278 -0.638060 
 -0.202548 -0.195696 -0.623134 
 -0.202548 -0.195115 -0.611940 
 -0.201274 -0.195115 -0.604478 
 -0.201274 -0.194533 -0.604478 
 -0.201274 -0.193952 -0.615672 
 -0.200000 -0.193952 -0.623134 
 -0.200000 -0.193370 -0.641791 
 -0.200000 -0.192789 -0.660448 
 -0.198726 -0.192789 -0.664179 
 -0.198726 -0.192207 -0.701493 
 -0.198726 -0.191625 -0.723881 
 -0.198726 -0.191044 -0.757463 
 -0.197452 -0.191044 -0.757463 
 -0.197452 -0.190462 -0.783582 
 -0.197452 -0.189881 -0.805970 
 -0.196178 -0.189881 -0.820896 
 -0.196178 -0.189299 -0.839552 
 -0.196178 -0.188718 -0.850746 
 -0.194904 -0.188718 -0.865672 
 -0.194904 -0.188136 -0.888060 
 -0.194904 -0.187555 -0.902985 
 -0.193631 -0.187555 -0.921642 
 -0.193631 -0.186973 -0.940299 
 -0.193631 -0.186391 -0.947761 
 -0.192357 -0.186391 -0.955224 
 -0.192357 -0.185810 -0.977612 
 -0.192357 -0.185228 -0.977612 
 -0.191083 -0.184647 -0.973881 
 -0.191083 -0.184065 -0.977612 
 -0.191083 -0.183484 -0.981343 
 -0.189809 -0.183484 -0.981343 
 -0.189809 -0.182902 -0.985075 
 -0.189809 -0.182320 -0.988806 
 -0.188535 -0.182320 -0.988806 
 -0.188535 -0.181739 -0.988806 
 -0.188535 -0.181157 -0.992537 
 -0.187261 -0.181157 -0.992537 
 -0.187261 -0.180576 -0.992537 
 -0.187261 -0.179994 -0.996269 
 -0.185987 -0.179994 -0.996269 
 -0.185987 -0.179413 -0.996269 
 -0.185987 -0.178831 -0.996269 
 -0.184713 -0.178831 -0.996269 
 -0.184713 -0.178249 -1.000000 
 -0.184713 -0.177668 -1.000000 
 -0.184713 -0.177086 -0.996269 
 -0.183439 -0.177086 -0.996269 
 -0.183439 -0.176505 -0.996269 
 -0.183439 -0.175923 -0.996269 
 -0.182166 -0.175923 -0.996269 
 -0.182166 -0.175342 -0.996269 
 -0.182166 -0.174760 -0.996269 
 -0.180892 -0.174760 -0.996269 
 -0.180892 -0.174179 -0.996269 
 -0.180892 -0.173597 -1.000000 
 -0.179618 -0.173597 -0.996269 
 -0.179618 -0.173015 -0.996269 
 -0.179618 -0.172434 -0.996269 
 -0.178344 -0.172434 -0.996269 
 -0.178344 -0.171852 -0.996269 
 -0.178344 -0.171271 -0.996269 
 -0.178344 -0.170689 -0.996269 
 -0.177070 -0.170689 -0.996269 
 -0.177070 -0.170108 -0.996269 
 -0.177070 -0.169526 -0.996269 
 -0.175796 -0.169526 -0.996269 
 -0.175796 -0.168944 -0.996269 
 -0.175796 -0.168363 -0.996269 
 -0.174522 -0.168363 -0.996269 
 -0.174522 -0.167781 -0.996269 
 -0.174522 -0.167200 -0.996269 
 -0.173248 -0.167200 -0.996269 
 -0.173248 -0.166618 -0.996269 
 -0.173248 -0.166037 -0.996269 
 -0.171975 -0.166037 -0.996269 
 -0.171975 -0.165455 -0.996269 
 -0.171975 -0.164874 -0.996269 
 -0.171975 -0.164292 -0.996269 
 -0.170701 -0.164292 -0.996269 
 -0.170701 -0.163710 -0.996269 
 -0.170701 -0.163129 -0.996269 
 -0.169427 -0.163129 -0.996269 
 -0.169427 -0.162547 -1.000000 
 -0.169427 -0.161966 -1.000000 
 -0.168153 -0.161966 -1.000000 
 -0.168153 -0.161384 -1.000000 
 -0.168153 -0.160803 -1.000000 
 -0.166879 -0.160803 -1.000000 
 -0.166879 -0.160221 -1.000000 
 -0.166879 -0.159639 -1.000000 
 -0.165605 -0.159639 -1.000000 
 -0.165605 -0.159058 -1.000000 
 -0.165605 -0.158476 -1.000000 
 -0.165605 -0.157895 -1.000000 
 -0.164331 -0.157895 -0.996269 
 -0.164331 -0.157313 -0.996269 
 -0.164331 -0.156732 -0.996269 
 -0.163057 -0.156732 -0.996269 
 -0.163057 -0.156150 -0.996269 
 -0.163057 -0.155568 -0.996269 
 -0.161783 -0.155568 -0.996269 
 -0.161783 -0.154987 -0.996269 
 -0.161783 -0.154405 -0.996269 
 -0.160510 -0.154405 -0.996269 
 -0.160510 -0.153824 -0.996269 
 -0.160510 -0.153242 -0.996269 
 -0.159236 -0.153242 -0.996269 
 -0.159236 -0.152661 -0.996269 
 -0.159236 -0.152079 -0.988806 
 -0.157962 -0.151498 -0.985075 
 -0.157962 -0.150916 -0.966418 
 -0.157962 -0.150334 -0.955224 
 -0.156688 -0.150334 -0.958955 
 -0.156688 -0.149753 -0.962687 
 -0.156688 -0.149171 -0.988806 
 -0.155414 -0.149171 -0.988806 
 -0.155414 -0.148590 -0.988806 
 -0.155414 -0.148008 -0.992537 
 -0.154140 -0.148008 -0.992537 
 -0.154140 -0.147427 -0.992537 
 -0.154140 -0.146845 -0.996269 
 -0.152866 -0.146845 -0.996269 
 -0.152866 -0.146263 -0.996269 
 -0.152866 -0.145682 -0.996269 
 -0.151592 -0.145682 -0.992537 
 -0.151592 -0.145100 -0.992537 
 -0.151592 -0.144519 -0.996269 
 -0.151592 -0.143937 -0.996269 
 -0.150318 -0.143937 -0.992537 
 -0.150318 -0.143356 -0.996269 
 -0.150318 -0.142774 -0.996269 
 -0.149045 -0.142774 -0.996269 
 -0.149045 -0.142192 -0.996269 
 -0.149045 -0.141611 -0.992537 
 -0.147771 -0.141611 -0.996269 
 -0.147771 -0.141029 -0.988806 
 -0.147771 -0.140448 -0.985075 
 -0.146497 -0.140448 -0.988806 
 -0.146497 -0.139866 -0.977612 
 -0.146497 -0.139285 -0.977612 
 -0.145223 -0.139285 -0.977612 
 -0.145223 -0.138703 -0.977612 
 -0.145223 -0.138122 -0.977612 
 -0.145223 -0.137540 -0.977612 
 -0.143949 -0.137540 -0.977612 
 -0.143949 -0.136958 -0.977612 
 -0.143949 -0.136377 -0.977612 
 -0.142675 -0.136377 -0.977612 
 -0.142675 -0.135795 -0.977612 
 -0.142675 -0.135214 -0.977612 
 -0.141401 -0.135214 -0.977612 
 -0.141401 -0.134632 -0.977612 
 -0.141401 -0.134051 -0.977612 
 -0.140127 -0.134051 -0.977612 
 -0.140127 -0.133469 -0.977612 
 -0.140127 -0.132887 -0.977612 
 -0.138854 -0.132887 -0.977612 
 -0.138854 -0.132306 -0.977612 
 -0.138854 -0.131724 -0.973881 
 -0.138854 -0.131143 -0.973881 
 -0.137580 -0.131143 -0.973881 
 -0.137580 -0.130561 -0.973881 
 -0.137580 -0.129980 -0.973881 
 -0.136306 -0.129980 -0.973881 
 -0.136306 -0.129398 -0.977612 
 -0.136306 -0.128817 -0.977612 
 -0.135032 -0.128817 -0.977612 
 -0.135032 -0.128235 -0.977612 
 -0.135032 -0.127653 -0.977612 
 -0.133758 -0.127653 -0.977612 
 -0.133758 -0.127072 -0.977612 
 -0.133758 -0.126490 -0.973881 
 -0.132484 -0.126490 -0.977612 
 -0.132484 -0.125909 -0.973881 
 -0.132484 -0.125327 -0.973881 
 -0.131210 -0.125327 -0.973881 
 -0.131210 -0.124746 -0.973881 
 -0.131210 -0.124164 -0.973881 
 -0.131210 -0.123582 -0.970149 
 -0.129936 -0.123582 -0.970149 
 -0.129936 -0.123001 -0.970149 
 -0.129936 -0.122419 -0.966418 
 -0.128662 -0.122419 -0.966418 
 -0.128662 -0.121838 -0.966418 
 -0.128662 -0.121256 -0.962687 
 -0.127389 -0.121256 -0.966418 
 -0.127389 -0.120675 -0.962687 
 -0.127389 -0.120093 -0.962687 
 -0.126115 -0.120093 -0.962687 
 -0.126115 -0.119511 -0.962687 
 -0.126115 -0.118930 -0.962687 
 -0.124841 -0.118930 -0.962687 
 -0.124841 -0.118348 -0.962687 
 -0.124841 -0.117767 -0.962687 
 -0.124841 -0.117185 -0.962687 
 -0.123567 -0.117185 -0.962687 
 -0.123567 -0.116604 -0.962687 
 -0.123567 -0.116022 -0.958955 
 -0.122293 -0.116022 -0.958955 
 -0.122293 -0.115441 -0.958955 
 -0.122293 -0.114859 -0.958955 
 -0.121019 -0.114859 -0.958955 
 -0.121019 -0.114277 -0.958955 
 -0.121019 -0.113696 -0.955224 
 -0.119745 -0.113696 -0.955224 
 -0.119745 -0.113114 -0.955224 
 -0.119745 -0.112533 -0.955224 
 -0.118471 -0.112533 -0.955224 
 -0.118471 -0.111951 -0.955224 
 -0.118471 -0.111370 -0.955224 
 -0.118471 -0.110788 -0.955224 
 -0.117197 -0.110788 -0.955224 
 -0.117197 -0.110206 -0.955224 
 -0.117197 -0.109625 -0.955224 
 -0.115924 -0.109625 -0.955224 
 -0.115924 -0.109043 -0.955224 
 -0.115924 -0.108462 -0.955224 
 -0.114650 -0.108462 -0.955224 
 -0.114650 -0.107880 -0.951493 
 -0.114650 -0.107299 -0.951493 
 -0.113376 -0.107299 -0.951493 
 -0.113376 -0.106717 -0.951493 
 -0.113376 -0.106136 -0.951493 
 -0.112102 -0.106136 -0.951493 
 -0.112102 -0.105554 -0.947761 
 -0.112102 -0.104972 -0.947761 
 -0.110828 -0.104391 -0.944030 
 -0.110828 -0.103809 -0.944030 
 -0.110828 -0.103228 -0.944030 
 -0.109554 -0.103228 -0.944030 
 -0.109554 -0.102646 -0.936567 
 -0.109554 -0.102065 -0.929104 
 -0.108280 -0.102065 -0.925373 
 -0.108280 -0.101483 -0.914179 
 -0.108280 -0.100901 -0.910448 
 -0.107006 -0.100901 -0.899254 
 -0.107006 -0.100320 -0.884328 
 -0.107006 -0.099738 -0.873134 
 -0.105732 -0.099738 -0.854478 
 -0.105732 -0.099157 -0.835821 
 -0.105732 -0.098575 -0.820896 
 -0.104459 -0.098575 -0.809701 
 -0.104459 -0.097994 -0.798507 
 -0.104459 -0.097412 -0.794776 
 -0.104459 -0.096830 -0.798507 
 -0.103185 -0.096830 -0.779851 
 -0.103185 -0.096249 -0.794776 
 -0.103185 -0.095667 -0.802239 
 -0.101911 -0.095667 -0.783582 
 -0.101911 -0.095086 -0.787313 
 -0.101911 -0.094504 -0.791045 
 -0.100637 -0.094504 -0.764925 
 -0.100637 -0.093923 -0.764925 
 -0.100637 -0.093341 -0.761194 
 -0.099363 -0.093341 -0.750000 
 -0.099363 -0.092760 -0.735075 
 -0.099363 -0.092178 -0.735075 
 -0.098089 -0.092178 -0.735075 
 -0.098089 -0.091596 -0.742537 
 -0.098089 -0.091015 -0.757463 
 -0.098089 -0.090433 -0.772388 
 -0.096815 -0.090433 -0.783582 
 -0.096815 -0.089852 -0.794776 
 -0.096815 -0.089270 -0.787313 
 -0.095541 -0.089270 -0.794776 
 -0.095541 -0.088689 -0.779851 
 -0.095541 -0.088107 -0.772388 
 -0.094268 -0.088107 -0.787313 
 -0.094268 -0.087525 -0.798507 
 -0.094268 -0.086944 -0.805970 
 -0.092994 -0.086944 -0.824627 
 -0.092994 -0.086362 -0.824627 
 -0.092994 -0.085781 -0.817164 
 -0.091720 -0.085781 -0.817164 
 -0.091720 -0.085199 -0.802239 
 -0.091720 -0.084618 -0.794776 
 -0.091720 -0.084036 -0.772388 
 -0.090446 -0.084036 -0.761194 
 -0.090446 -0.083454 -0.750000 
 -0.090446 -0.082873 -0.738806 
 -0.089172 -0.082873 -0.727612 
 -0.089172 -0.082291 -0.720149 
 -0.089172 -0.081710 -0.701493 
 -0.087898 -0.081710 -0.682836 
 -0.087898 -0.081128 -0.675373 
 -0.087898 -0.080547 -0.656716 
 -0.086624 -0.080547 -0.652985 
 -0.086624 -0.079965 -0.638060 
 -0.086624 -0.079384 -0.630597 
 -0.085350 -0.079384 -0.623134 
 -0.085350 -0.078802 -0.611940 
 -0.085350 -0.078220 -0.604478 
 -0.084076 -0.077639 -0.630597 
 -0.084076 -0.077057 -0.634328 
 -0.084076 -0.076476 -0.641791 
 -0.082803 -0.076476 -0.656716 
 -0.082803 -0.075894 -0.660448 
 -0.082803 -0.075313 -0.671642 
 -0.081529 -0.075313 -0.697761 
 -0.081529 -0.074731 -0.712687 
 -0.081529 -0.074149 -0.727612 
 -0.080255 -0.074149 -0.746269 
 -0.080255 -0.073568 -0.753731 
 -0.080255 -0.072986 -0.757463 
 -0.078981 -0.072986 -0.768657 
 -0.078981 -0.072405 -0.757463 
 -0.078981 -0.071823 -0.738806 
 -0.077707 -0.071823 -0.731343 
 -0.077707 -0.071242 -0.712687 
 -0.077707 -0.070660 -0.697761 
 -0.077707 -0.070079 -0.675373 
 -0.076433 -0.070079 -0.694030 
 -0.076433 -0.069497 -0.682836 
 -0.076433 -0.068915 -0.679104 
 -0.075159 -0.068915 -0.697761 
 -0.075159 -0.068334 -0.705224 
 -0.075159 -0.067752 -0.727612 
 -0.073885 -0.067752 -0.727612 
 -0.073885 -0.067171 -0.746269 
 -0.073885 -0.066589 -0.768657 
 -0.072611 -0.066589 -0.761194 
 -0.072611 -0.066008 -0.776119 
 -0.072611 -0.065426 -0.809701 
 -0.071338 -0.065426 -0.802239 
 -0.071338 -0.064844 -0.828358 
 -0.071338 -0.064263 -0.828358 
 -0.071338 -0.063681 -0.832090 
 -0.070064 -0.063681 -0.843284 
 -0.070064 -0.063100 -0.847015 
 -0.070064 -0.062518 -0.843284 
 -0.068790 -0.062518 -0.854478 
 -0.068790 -0.061937 -0.850746 
 -0.068790 -0.061355 -0.854478 
 -0.067516 -0.061355 -0.858209 
 -0.067516 -0.060773 -0.861940 
 -0.067516 -0.060192 -0.854478 
 -0.066242 -0.060192 -0.858209 
 -0.066242 -0.059610 -0.850746 
 -0.066242 -0.059029 -0.832090 
 -0.064968 -0.059029 -0.835821 
 -0.064968 -0.058447 -0.820896 
 -0.064968 -0.057866 -0.813433 
 -0.064968 -0.057284 -0.813433 
 -0.063694 -0.057284 -0.828358 
 -0.063694 -0.056703 -0.824627 
 -0.063694 -0.056121 -0.817164 
 -0.062420 -0.056121 -0.820896 
 -0.062420 -0.055539 -0.798507 
 -0.062420 -0.054958 -0.776119 
 -0.061146 -0.054958 -0.787313 
 -0.061146 -0.054376 -0.768657 
 -0.061146 -0.053795 -0.757463 
 -0.059873 -0.053795 -0.783582 
 -0.059873 -0.053213 -0.772388 
 -0.059873 -0.052632 -0.764925 
 -0.058599 -0.052632 -0.787313 
 -0.058599 -0.052050 -0.779851 
 -0.058599 -0.051468 -0.779851 
 -0.058599 -0.050887 -0.787313 
 -0.057325 -0.050887 -0.805970 
 -0.057325 -0.050305 -0.802239 
 -0.057325 -0.049724 -0.787313 
 -0.056051 -0.049724 -0.794776 
 -0.056051 -0.049142 -0.764925 
 -0.056051 -0.048561 -0.757463 
 -0.054777 -0.048561 -0.768657 
 -0.054777 -0.047979 -0.768657 
 -0.054777 -0.047397 -0.772388 
 -0.053503 -0.047397 -0.783582 
 -0.053503 -0.046816 -0.798507 
 -0.053503 -0.046234 -0.798507 
 -0.052229 -0.046234 -0.805970 
 -0.052229 -0.045653 -0.798507 
 -0.052229 -0.045071 -0.787313 
 -0.052229 -0.044490 -0.761194 
 -0.050955 -0.044490 -0.768657 
 -0.050955 -0.043908 -0.772388 
 -0.050955 -0.043327 -0.779851 
 -0.049682 -0.043327 -0.776119 
 -0.049682 -0.042745 -0.820896 
 -0.049682 -0.042163 -0.828358 
 -0.048408 -0.042163 -0.828358 
 -0.048408 -0.041582 -0.828358 
 -0.048408 -0.041000 -0.828358 
 -0.047134 -0.041000 -0.828358 
 -0.047134 -0.040419 -0.824627 
 -0.047134 -0.039837 -0.820896 
 -0.045860 -0.039837 -0.824627 
 -0.045860 -0.039256 -0.817164 
 -0.045860 -0.038674 -0.813433 
 -0.045860 -0.038092 -0.798507 
 -0.044586 -0.038092 -0.809701 
 -0.044586 -0.037511 -0.802239 
 -0.044586 -0.036929 -0.798507 
 -0.043312 -0.036929 -0.813433 
 -0.043312 -0.036348 -0.805970 
 -0.043312 -0.035766 -0.802239 
 -0.042038 -0.035766 -0.813433 
 -0.042038 -0.035185 -0.809701 
 -0.042038 -0.034603 -0.805970 
 -0.040764 -0.034603 -0.809701 
 -0.040764 -0.034022 -0.805970 
 -0.040764 -0.033440 -0.802239 
 -0.039490 -0.033440 -0.809701 
 -0.039490 -0.032858 -0.805970 
 -0.039490 -0.032277 -0.798507 
 -0.039490 -0.031695 -0.794776 
 -0.038217 -0.031695 -0.802239 
 -0.038217 -0.031114 -0.802239 
 -0.038217 -0.030532 -0.802239 
 -0.036943 -0.030532 -0.805970 
 -0.036943 -0.029951 -0.805970 
 -0.036943 -0.029369 -0.802239 
 -0.035669 -0.029369 -0.802239 
 -0.035669 -0.028787 -0.802239 
 -0.035669 -0.028206 -0.802239 
 -0.034395 -0.028206 -0.802239 
 -0.034395 -0.027624 -0.802239 
 -0.034395 -0.027043 -0.802239 
 -0.033121 -0.027043 -0.802239 
 -0.033121 -0.026461 -0.802239 
 -0.033121 -0.025880 -0.802239 
 -0.033121 -0.025298 -0.802239 
 -0.031847 -0.025298 -0.802239 
 -0.031847 -0.024716 -0.802239 
 -0.031847 -0.024135 -0.798507 
 -0.030573 -0.024135 -0.802239 
 -0.030573 -0.023553 -0.802239 
 -0.030573 -0.022972 -0.802239 
 -0.029299 -0.022972 -0.805970 
 -0.029299 -0.022390 -0.805970 
 -0.029299 -0.021809 -0.805970 
 -0.028025 -0.021809 -0.805970 
 -0.028025 -0.021227 -0.805970 
 -0.028025 -0.020646 -0.798507 
 -0.026752 -0.020646 -0.798507 
 -0.026752 -0.020064 -0.794776 
 -0.026752 -0.019482 -0.791045 
 -0.025478 -0.019482 -0.791045 
 -0.025478 -0.018901 -0.791045 
 -0.025478 -0.018319 -0.791045 
 -0.025478 -0.017738 -0.791045 
 -0.024204 -0.017738 -0.787313 
 -0.024204 -0.017156 -0.783582 
 -0.024204 -0.016575 -0.783582 
 -0.022930 -0.016575 -0.779851 
 -0.022930 -0.015993 -0.779851 
 -0.022930 -0.015411 -0.776119 
 -0.021656 -0.015411 -0.776119 
 -0.021656 -0.014830 -0.772388 
 -0.021656 -0.014248 -0.772388 
 -0.020382 -0.014248 -0.772388 
 -0.020382 -0.013667 -0.772388 
 -0.020382 -0.013085 -0.772388 
 -0.019108 -0.013085 -0.768657 
 -0.019108 -0.012504 -0.764925 
 -0.019108 -0.011922 -0.768657 
 -0.019108 -0.011341 -0.768657 
 -0.017834 -0.011341 -0.764925 
 -0.017834 -0.010759 -0.764925 
 -0.017834 -0.010177 -0.761194 
 -0.016561 -0.010177 -0.757463 
 -0.016561 -0.009596 -0.753731 
 -0.016561 -0.009014 -0.750000 
 -0.015287 -0.009014 -0.750000 
 -0.015287 -0.008433 -0.746269 
 -0.015287 -0.007851 -0.742537 
 -0.014013 -0.007851 -0.746269 
 -0.014013 -0.007270 -0.738806 
 -0.014013 -0.006688 -0.735075 
 -0.012739 -0.006688 -0.735075 
 -0.012739 -0.006106 -0.735075 
 -0.012739 -0.005525 -0.735075 
 -0.012739 -0.004943 -0.735075 
 -0.011465 -0.004943 -0.735075 
 -0.011465 -0.004362 -0.727612 
 -0.011465 -0.003780 -0.720149 
 -0.010191 -0.003780 -0.720149 
 -0.010191 -0.003199 -0.708955 
 -0.010191 -0.002617 -0.701493 
 -0.008917 -0.002617 -0.697761 
 -0.008917 -0.002035 -0.686567 
 -0.008917 -0.001454 -0.679104 
 -0.007643 -0.001454 -0.671642 
 -0.007643 -0.000872 -0.656716 
 -0.007643 -0.000291 -0.641791 
 -0.006369 -0.000291 -0.615672 
 -0.006369 0.000291 -0.585821 
 -0.006369 0.000872 -0.578358 
 -0.006369 0.001454 -0.567164 
 -0.005096 0.001454 -0.548507 
 -0.005096 0.002035 -0.537313 
 -0.005096 0.002617 -0.526119 
 -0.003822 0.002617 -0.511194 
 -0.003822 0.003199 -0.485075 
 -0.003822 0.003780 -0.473881 
 -0.002548 0.003780 -0.470149 
 -0.002548 0.004362 -0.447761 
 -0.002548 0.004943 -0.429104 
 -0.001274 0.004943 -0.429104 
 -0.001274 0.005525 -0.384328 
 -0.001274 0.006106 -0.358209 
 0.000000 0.006106 -0.361940 
 0.000000 0.006688 -0.313433 
 0.000000 0.007270 -0.283582 
 0.000000 0.007851 -0.253731 
 0.001274 0.007851 -0.272388 
 0.001274 0.008433 -0.242537 
 0.001274 0.009014 -0.220149 
 0.002548 0.009014 -0.220149 
 0.002548 0.009596 -0.197761 
 0.002548 0.010177 -0.182836 
 0.003822 0.010177 -0.164179 
 0.003822 0.010759 -0.156716 
 0.003822 0.011341 -0.156716 
 0.005096 0.011341 -0.126866 
 0.005096 0.011922 -0.130597 
 0.005096 0.012504 -0.126866 
 0.006369 0.012504 -0.100746 
 0.006369 0.013085 -0.097015 
 0.006369 0.013667 -0.100746 
 0.006369 0.014248 -0.108209 
 0.007643 0.014248 -0.070896 
 0.007643 0.014830 -0.074627 
 0.007643 0.015411 -0.082090 
 0.008917 0.015411 -0.033582 
 0.008917 0.015993 -0.033582 
 0.008917 0.016575 -0.037313 
 0.010191 0.016575 0.000000 
 0.010191 0.017156 -0.003731 
 0.010191 0.017738 -0.007463 
 0.011465 0.017738 0.026119 
 0.011465 0.018319 0.014925 
 0.011465 0.018901 -0.003731 
 0.012739 0.018901 0.033582 
 0.012739 0.019482 0.026119 
 0.012739 0.020064 0.014925 
 0.012739 0.020646 0.014925 
 0.014013 0.020646 0.041045 
 0.014013 0.021227 0.052239 
 0.014013 0.021809 0.082090 
 0.015287 0.021809 0.130597 
 0.015287 0.022390 0.152985 
 0.015287 0.022972 0.167910 
 0.016561 0.022972 0.201493 
 0.016561 0.023553 0.212687 
 0.016561 0.024135 0.231343 
 0.017834 0.024135 0.261194 
 0.017834 0.024716 0.261194 
 0.017834 0.025298 0.257463 
 0.019108 0.025298 0.283582 
 0.019108 0.025880 0.291045 
 0.019108 0.026461 0.328358 
 0.020382 0.027043 0.369403 
 0.020382 0.027624 0.402985 
 0.020382 0.028206 0.432836 
 0.021656 0.028206 0.466418 
 0.021656 0.028787 0.511194 
 0.021656 0.029369 0.537313 
 0.022930 0.029369 0.555970 
 0.022930 0.029951 0.578358 
 0.022930 0.030532 0.589552 
 0.024204 0.030532 0.597015 
 0.024204 0.031114 0.585821 
 0.024204 0.031695 0.555970 
 0.025478 0.031695 0.548507 
 0.025478 0.032277 0.526119 
 0.025478 0.032858 0.500000 
 0.026752 0.032858 0.492537 
 0.026752 0.033440 0.470149 
 0.026752 0.034022 0.447761 
 0.026752 0.034603 0.436567 
 0.028025 0.034603 0.417910 
 0.028025 0.035185 0.406716 
 0.028025 0.035766 0.406716 
 0.029299 0.035766 0.388060 
 0.029299 0.036348 0.399254 
 0.029299 0.036929 0.417910 
 0.030573 0.036929 0.399254 
 0.030573 0.037511 0.440299 
 0.030573 0.038092 0.462687 
 0.031847 0.038092 0.444030 
 0.031847 0.038674 0.458955 
 0.031847 0.039256 0.466418 
 0.033121 0.039256 0.440299 
 0.033121 0.039837 0.440299 
 0.033121 0.040419 0.436567 
 0.033121 0.041000 0.436567 
 0.034395 0.041000 0.417910 
 0.034395 0.041582 0.440299 
 0.034395 0.042163 0.466418 
 0.035669 0.042163 0.447761 
 0.035669 0.042745 0.473881 
 0.035669 0.043327 0.496269 
 0.036943 0.043327 0.477612 
 0.036943 0.043908 0.514925 
 0.036943 0.044490 0.533582 
 0.038217 0.044490 0.511194 
 0.038217 0.045071 0.537313 
 0.038217 0.045653 0.548507 
 0.039490 0.045653 0.522388 
 0.039490 0.046234 0.537313 
 0.039490 0.046816 0.541045 
 0.039490 0.047397 0.537313 
 0.040764 0.047397 0.514925 
 0.040764 0.047979 0.514925 
 0.040764 0.048561 0.511194 
 0.042038 0.048561 0.514925 
 0.042038 0.049142 0.503731 
 0.042038 0.049724 0.492537 
 0.043312 0.049724 0.500000 
 0.043312 0.050305 0.473881 
 0.043312 0.050887 0.455224 
 0.044586 0.050887 0.440299 
 0.044586 0.051468 0.402985 
 0.044586 0.052050 0.376866 
 0.045860 0.052050 0.358209 
 0.045860 0.052632 0.305970 
 0.045860 0.053213 0.276119 
 0.045860 0.053795 0.242537 
 0.047134 0.053795 0.220149 
 0.047134 0.054376 0.208955 
 0.047134 0.054958 0.190299 
 0.048408 0.054958 0.167910 
 0.048408 0.055539 0.152985 
 0.048408 0.056121 0.138060 
 0.049682 0.056121 0.115672 
 0.049682 0.056703 0.104478 
 0.049682 0.057284 0.097015 
 0.050955 0.057284 0.059701 
 0.050955 0.057866 0.052239 
 0.050955 0.058447 0.052239 
 0.052229 0.058447 0.026119 
 0.052229 0.059029 0.029851 
 0.052229 0.059610 0.026119 
 0.052229 0.060192 0.014925 
 0.053503 0.060192 0.003731 
 0.053503 0.060773 -0.007463 
 0.053503 0.061355 -0.044776 
 0.054777 0.061355 -0.044776 
 0.054777 0.061937 -0.074627 
 0.054777 0.062518 -0.104478 
 0.056051 0.062518 -0.104478 
 0.056051 0.063100 -0.130597 
 0.056051 0.063681 -0.156716 
 0.057325 0.063681 -0.160448 
 0.057325 0.064263 -0.179104 
 0.057325 0.064844 -0.205224 
 0.058599 0.064844 -0.208955 
 0.058599 0.065426 -0.227612 
 0.058599 0.066008 -0.242537 
 0.058599 0.066589 -0.261194 
 0.059873 0.066589 -0.264925 
 0.059873 0.067171 -0.276119 
 0.059873 0.067752 -0.287313 
 0.061146 0.067752 -0.294776 
 0.061146 0.068334 -0.313433 
 0.061146 0.068915 -0.328358 
 0.062420 0.068915 -0.335821 
 0.062420 0.069497 -0.343284 
 0.062420 0.070079 -0.354478 
 0.063694 0.070079 -0.361940 
 0.063694 0.070660 -0.369403 
 0.063694 0.071242 -0.380597 
 0.064968 0.071242 -0.391791 
 0.064968 0.071823 -0.402985 
 0.064968 0.072405 -0.417910 
 0.064968 0.072986 -0.417910 
 0.066242 0.072986 -0.417910 
 0.066242 0.073568 -0.410448 
 0.066242 0.074149 -0.406716 
 0.067516 0.074149 -0.395522 
 0.067516 0.074731 -0.391791 
 0.067516 0.075313 -0.388060 
 0.068790 0.075313 -0.373134 
 0.068790 0.075894 -0.365672 
 0.068790 0.076476 -0.347015 
 0.070064 0.076476 -0.324627 
 0.070064 0.077057 -0.317164 
 0.070064 0.077639 -0.313433 
 0.071338 0.077639 -0.291045 
 0.071338 0.078220 -0.283582 
 0.071338 0.078802 -0.261194 
 0.071338 0.079384 -0.253731 
 0.072611 0.079384 -0.227612 
 0.072611 0.079965 -0.208955 
 0.072611 0.080547 -0.197761 
 0.073885 0.080547 -0.171642 
 0.073885 0.081128 -0.186567 
 0.073885 0.081710 -0.201493 
 0.075159 0.081710 -0.182836 
 0.075159 0.082291 -0.208955 
 0.075159 0.082873 -0.223881 
 0.076433 0.082873 -0.201493 
 0.076433 0.083454 -0.208955 
 0.076433 0.084036 -0.190299 
 0.077707 0.084036 -0.171642 
 0.077707 0.084618 -0.149254 
 0.077707 0.085199 -0.115672 
 0.077707 0.085781 -0.104478 
 0.078981 0.085781 -0.085821 
 0.078981 0.086362 -0.074627 
 0.078981 0.086944 -0.082090 
 0.080255 0.086944 -0.052239 
 0.080255 0.087525 -0.070896 
 0.080255 0.088107 -0.082090 
 0.081529 0.088107 -0.059701 
 0.081529 0.088689 -0.063433 
 0.081529 0.089270 -0.063433 
 0.082803 0.089270 -0.007463 
 0.082803 0.089852 0.003731 
 0.082803 0.090433 0.014925 
 0.084076 0.091015 0.067164 
 0.084076 0.091596 0.055970 
 0.084076 0.092178 0.037313 
 0.085350 0.092178 0.055970 
 0.085350 0.092760 0.048507 
 0.085350 0.093341 0.048507 
 0.086624 0.093341 0.078358 
 0.086624 0.093923 0.070896 
 0.086624 0.094504 0.067164 
 0.087898 0.094504 0.089552 
 0.087898 0.095086 0.070896 
 0.087898 0.095667 0.041045 
 0.089172 0.095667 0.059701 
 0.089172 0.096249 -0.007463 
 0.089172 0.096830 -0.037313 
 0.089172 0.097412 -0.078358 
 0.090446 0.097412 -0.059701 
 0.090446 0.097994 -0.089552 
 0.090446 0.098575 -0.130597 
 0.091720 0.098575 -0.115672 
 0.091720 0.099157 -0.141791 
 0.091720 0.099738 -0.149254 
 0.092994 0.099738 -0.115672 
 0.092994 0.100320 -0.104478 
 0.092994 0.100901 -0.093284 
 0.094268 0.100901 -0.029851 
 0.094268 0.101483 -0.026119 
 0.094268 0.102065 -0.029851 
 0.095541 0.102065 -0.011194 
 0.095541 0.102646 -0.018657 
 0.095541 0.103228 -0.037313 
 0.095541 0.103809 -0.078358 
 0.096815 0.103809 -0.074627 
 0.096815 0.104391 -0.100746 
 0.096815 0.104972 -0.145522 
 0.098089 0.104972 -0.115672 
 0.098089 0.105554 -0.123134 
 0.098089 0.106136 -0.138060 
 0.099363 0.106136 -0.108209 
 0.099363 0.106717 -0.123134 
 0.099363 0.107299 -0.138060 
 0.100637 0.107299 -0.111940 
 0.100637 0.107880 -0.130597 
 0.100637 0.108462 -0.160448 
 0.101911 0.108462 -0.145522 
 0.101911 0.109043 -0.164179 
 0.101911 0.109625 -0.201493 
 0.101911 0.110206 -0.231343 
 0.103185 0.110206 -0.220149 
 0.103185 0.110788 -0.257463 
 0.103185 0.111370 -0.253731 
 0.104459 0.111370 -0.231343 
 0.104459 0.111951 -0.216418 
 0.104459 0.112533 -0.179104 
 0.105732 0.112533 -0.149254 
 0.105732 0.113114 -0.123134 
 0.105732 0.113696 -0.093284 
 0.107006 0.113696 -0.070896 
 0.107006 0.114277 -0.089552 
 0.107006 0.114859 -0.123134 
 0.108280 0.114859 -0.097015 
 0.108280 0.115441 -0.115672 
 0.108280 0.116022 -0.145522 
 0.108280 0.116604 -0.160448 
 0.109554 0.116604 -0.141791 
 0.109554 0.117185 -0.182836 
 0.109554 0.117767 -0.212687 
 0.110828 0.117767 -0.208955 
 0.110828 0.118348 -0.238806 
 0.110828 0.118930 -0.238806 
 0.112102 0.118930 -0.216418 
 0.112102 0.119511 -0.216418 
 0.112102 0.120093 -0.227612 
 0.113376 0.120093 -0.205224 
 0.113376 0.120675 -0.227612 
 0.113376 0.121256 -0.261194 
 0.113376 0.121838 -0.272388 
 0.114650 0.121838 -0.246269 
 0.114650 0.122419 -0.231343 
 0.114650 0.123001 -0.231343 
 0.115924 0.123001 -0.216418 
 0.115924 0.123582 -0.242537 
 0.115924 0.124164 -0.257463 
 0.117197 0.124164 -0.253731 
 0.117197 0.124746 -0.268657 
 0.117197 0.125327 -0.276119 
 0.118471 0.125327 -0.261194 
 0.118471 0.125909 -0.276119 
 0.118471 0.126490 -0.287313 
 0.119745 0.126490 -0.279851 
 0.119745 0.127072 -0.320896 
 0.119745 0.127653 -0.332090 
 0.119745 0.128235 -0.317164 
 0.121019 0.128235 -0.291045 
 0.121019 0.128817 -0.268657 
 0.121019 0.129398 -0.261194 
 0.122293 0.129398 -0.238806 
 0.122293 0.129980 -0.242537 
 0.122293 0.130561 -0.250000 
 0.123567 0.130561 -0.223881 
 0.123567 0.131143 -0.235075 
 0.123567 0.131724 -0.242537 
 0.124841 0.131724 -0.212687 
 0.124841 0.132306 -0.227612 
 0.124841 0.132887 -0.246269 
 0.124841 0.133469 -0.283582 
 0.126115 0.133469 -0.268657 
 0.126115 0.134051 -0.294776 
 0.126115 0.134632 -0.309701 
 0.127389 0.134632 -0.291045 
 0.127389 0.135214 -0.279851 
 0.127389 0.135795 -0.250000 
 0.128662 0.135795 -0.235075 
 0.128662 0.136377 -0.205224 
 0.128662 0.136958 -0.164179 
 0.129936 0.136958 -0.145522 
 0.129936 0.137540 -0.111940 
 0.129936 0.138122 -0.082090 
 0.131210 0.138122 -0.067164 
 0.131210 0.138703 -0.052239 
 0.131210 0.139285 -0.048507 
 0.131210 0.139866 -0.059701 
 0.132484 0.139866 -0.052239 
 0.132484 0.140448 -0.070896 
 0.132484 0.141029 -0.104478 
 0.133758 0.141029 -0.111940 
 0.133758 0.141611 -0.141791 
 0.133758 0.142192 -0.179104 
 0.135032 0.142192 -0.186567 
 0.135032 0.142774 -0.208955 
 0.135032 0.143356 -0.246269 
 0.136306 0.143356 -0.242537 
 0.136306 0.143937 -0.246269 
 0.136306 0.144519 -0.238806 
 0.136306 0.145100 -0.235075 
 0.137580 0.145100 -0.208955 
 0.137580 0.145682 -0.201493 
 0.137580 0.146263 -0.197761 
 0.138854 0.146263 -0.167910 
 0.138854 0.146845 -0.171642 
 0.138854 0.147427 -0.182836 
 0.140127 0.147427 -0.160448 
 0.140127 0.148008 -0.182836 
 0.140127 0.148590 -0.220149 
 0.141401 0.148590 -0.190299 
 0.141401 0.149171 -0.208955 
 0.141401 0.149753 -0.220149 
 0.142675 0.149753 -0.190299 
 0.142675 0.150334 -0.194030 
 0.142675 0.150916 -0.197761 
 0.142675 0.151498 -0.197761 
 0.143949 0.151498 -0.171642 
 0.143949 0.152079 -0.175373 
 0.143949 0.152661 -0.179104 
 0.145223 0.152661 -0.167910 
 0.145223 0.153242 -0.186567 
 0.145223 0.153824 -0.197761 
 0.146497 0.153824 -0.201493 
 0.146497 0.154405 -0.231343 
 0.146497 0.154987 -0.246269 
 0.147771 0.154987 -0.253731 
 0.147771 0.155568 -0.276119 
 0.147771 0.156150 -0.291045 
 0.147771 0.156732 -0.317164 
 0.149045 0.156732 -0.328358 
 0.149045 0.157313 -0.347015 
 0.149045 0.157895 -0.361940 
 0.150318 0.157895 -0.388060 
 0.150318 0.158476 -0.402985 
 0.150318 0.159058 -0.414179 
 0.151592 0.159058 -0.432836 
 0.151592 0.159639 -0.447761 
 0.151592 0.160221 -0.455224 
 0.152866 0.160221 -0.470149 
 0.152866 0.160803 -0.477612 
 0.152866 0.161384 -0.485075 
 0.154140 0.161966 -0.507463 
 0.154140 0.162547 -0.522388 
 0.154140 0.163129 -0.541045 
 0.155414 0.163129 -0.555970 
 0.155414 0.163710 -0.570896 
 0.155414 0.164292 -0.585821 
 0.156688 0.164292 -0.589552 
 0.156688 0.164874 -0.597015 
 0.156688 0.165455 -0.608209 
 0.157962 0.165455 -0.608209 
 0.157962 0.166037 -0.615672 
 0.157962 0.166618 -0.619403 
 0.159236 0.166618 -0.619403 
 0.159236 0.167200 -0.623134 
 0.159236 0.167781 -0.626866 
 0.159236 0.168363 -0.630597 
 0.160510 0.168363 -0.630597 
 0.160510 0.168944 -0.634328 
 0.160510 0.169526 -0.638060 
 0.161783 0.169526 -0.638060 
 0.161783 0.170108 -0.641791 
 0.161783 0.170689 -0.641791 
 0.163057 0.170689 -0.641791 
 0.163057 0.171271 -0.641791 
 0.163057 0.171852 -0.641791 
 0.164331 0.171852 -0.638060 
 0.164331 0.172434 -0.638060 
 0.164331 0.173015 -0.634328 
 0.164331 0.173597 -0.634328 
 0.165605 0.173597 -0.630597 
 0.165605 0.174179 -0.630597 
 0.165605 0.174760 -0.626866 
 0.166879 0.174760 -0.619403 
 0.166879 0.175342 -0.608209 
 0.166879 0.175923 -0.600746 
 0.168153 0.175923 -0.582090 
 0.168153 0.176505 -0.567164 
 0.168153 0.177086 -0.548507 
 0.169427 0.177086 -0.526119 
 0.169427 0.177668 -0.518657 
 0.169427 0.178249 -0.511194 
 0.170701 0.178831 -0.481343 
 0.170701 0.179413 -0.447761 
 0.170701 0.179994 -0.425373 
 0.171975 0.179994 -0.402985 
 0.171975 0.180576 -0.388060 
 0.171975 0.181157 -0.384328 
 0.173248 0.181157 -0.358209 
 0.173248 0.181739 -0.343284 
 0.173248 0.182320 -0.339552 
 0.174522 0.182320 -0.317164 
 0.174522 0.182902 -0.298507 
 0.174522 0.183484 -0.268657 
 0.175796 0.183484 -0.246269 
 0.175796 0.184065 -0.208955 
 0.175796 0.184647 -0.179104 
 0.175796 0.185228 -0.123134 
 0.177070 0.185228 -0.126866 
 0.177070 0.185810 -0.078358 
 0.177070 0.186391 -0.052239 
 0.178344 0.186391 -0.029851 
 0.178344 0.186973 -0.003731 
 0.178344 0.187555 -0.003731 
 0.179618 0.187555 0.011194 
 0.179618 0.188136 0.011194 
 0.179618 0.188718 0.007463 
 0.180892 0.188718 0.029851 
 0.180892 0.189299 0.029851 
 0.180892 0.189881 0.029851 
 0.180892 0.190462 0.026119 
 0.182166 0.190462 0.052239 
 0.182166 0.191044 0.041045 
 0.182166 0.191625 0.026119 
 0.183439 0.191625 0.048507 
 0.183439 0.192207 0.037313 
 0.183439 0.192789 0.022388 
 0.184713 0.192789 0.037313 
 0.184713 0.193370 0.026119 
 0.184713 0.193952 0.018657 
 0.185987 0.193952 0.033582 
 0.185987 0.194533 0.018657 
 0.185987 0.195115 0.011194 
 0.187261 0.195115 0.022388 
 0.187261 0.195696 0.011194 
 0.187261 0.196278 0.003731 
 0.187261 0.196860 -0.018657 
 0.188535 0.196860 -0.007463 
 0.188535 0.197441 -0.018657 
 0.188535 0.198023 -0.048507 
 0.189809 0.198023 -0.033582 
 0.189809 0.198604 -0.055970 
 0.189809 0.199186 -0.085821 
 0.191083 0.199186 -0.078358 
 0.191083 0.199767 -0.097015 
 0.191083 0.200349 -0.130597 
 0.192357 0.200349 -0.119403 
 0.192357 0.200931 -0.134328 
 0.192357 0.201512 -0.160448 
 0.192357 0.202094 -0.175373 
 0.193631 0.202094 -0.167910 
 0.193631 0.202675 -0.194030 
 0.193631 0.203257 -0.212687 
 0.194904 0.203257 -0.201493 
 0.194904 0.203838 -0.223881 
 0.194904 0.204420 -0.253731 
 0.196178 0.204420 -0.246269 
 0.196178 0.205001 -0.257463 
 0.196178 0.205583 -0.235075 
 0.197452 0.205583 -0.231343 
 0.197452 0.206165 -0.205224 
 0.197452 0.206746 -0.179104 
 0.198726 0.206746 -0.175373 
 0.198726 0.207328 -0.152985 
 0.198726 0.207909 -0.111940 
 0.198726 0.208491 -0.097015 
 0.200000 0.208491 -0.089552 
 0.200000 0.209072 -0.059701 
 0.200000 0.209654 -0.037313 
 0.201274 0.209654 -0.018657 
 0.201274 0.210236 0.011194 
 0.201274 0.210817 0.029851 
 0.202548 0.210817 0.041045 
 0.202548 0.211399 0.074627 
 0.202548 0.211980 0.089552 
 0.203822 0.211980 0.104478 
 0.203822 0.212562 0.123134 
 0.203822 0.213143 0.164179 
 0.203822 0.213725 0.186567 
 0.205096 0.213725 0.194030 
 0.205096 0.214306 0.231343 
 0.205096 0.214888 0.257463 
 0.206369 0.214888 0.272388 
 0.206369 0.215470 0.302239 
 0.206369 0.216051 0.317164 
 0.207643 0.216051 0.328358 
 0.207643 0.216633 0.358209 
 0.207643 0.217214 0.369403 
 0.208917 0.217214 0.388060 
 0.208917 0.217796 0.395522 
 0.208917 0.218377 0.395522 
 0.210191 0.218377 0.421642 
 0.210191 0.218959 0.417910 
 0.210191 0.219541 0.410448 
 0.210191 0.220122 0.399254 
 0.211465 0.220122 0.429104 
 0.211465 0.220704 0.425373 
 0.211465 0.221285 0.425373 
 0.212739 0.221285 0.458955 
 0.212739 0.221867 0.466418 
 0.212739 0.222448 0.477612 
 0.214013 0.222448 0.503731 
 0.214013 0.223030 0.518657 
 0.214013 0.223612 0.533582 
 0.215287 0.223612 0.552239 
 0.215287 0.224193 0.537313 
 0.215287 0.224775 0.514925 
 0.216561 0.224775 0.488806 
 0.216561 0.225356 0.444030 
 0.216561 0.225938 0.417910 
 0.216561 0.226519 0.380597 
 0.217834 0.226519 0.361940 
 0.217834 0.227101 0.335821 
 0.217834 0.227682 0.298507 
 0.219108 0.227682 0.287313 
 0.219108 0.228264 0.268657 
 0.219108 0.228846 0.227612 
 0.220382 0.228846 0.212687 
 0.220382 0.229427 0.190299 
 0.220382 0.230009 0.156716 
 0.221656 0.230009 0.171642 
 0.221656 0.230590 0.160448 
 0.221656 0.231172 0.149254 
 0.222930 0.231753 0.167910 
 0.222930 0.232335 0.160448 
 0.222930 0.232917 0.149254 
 0.224204 0.232917 0.175373 
 0.224204 0.233498 0.167910 
 0.224204 0.234080 0.156716 
 0.225478 0.234080 0.175373 
 0.225478 0.234661 0.167910 
 0.225478 0.235243 0.149254 
 0.226752 0.235243 0.167910 
 0.226752 0.235824 0.156716 
 0.226752 0.236406 0.130597 
 0.228025 0.236406 0.149254 
 0.228025 0.236987 0.134328 
 0.228025 0.237569 0.111940 
 0.229299 0.238151 0.111940 
 0.229299 0.238732 0.082090 
 0.229299 0.239314 0.063433 
 0.230573 0.239314 0.074627 
 0.230573 0.239895 0.052239 
 0.230573 0.240477 0.022388 
 0.231847 0.240477 0.022388 
 0.231847 0.241058 0.003731 
 0.231847 0.241640 -0.022388 
 0.233121 0.241640 -0.044776 
 0.233121 0.242222 -0.074627 
 0.233121 0.242803 -0.111940 
 0.234395 0.242803 -0.123134 
 0.234395 0.243385 -0.149254 
 0.234395 0.243966 -0.175373 
 0.235669 0.244548 -0.164179 
 0.235669 0.245129 -0.152985 
 0.235669 0.245711 -0.141791 
 0.236943 0.245711 -0.108209 
 0.236943 0.246293 -0.097015 
 0.236943 0.246874 -0.097015 
 0.238217 0.246874 -0.074627 
 0.238217 0.247456 -0.082090 
 0.238217 0.248037 -0.097015 
 0.239490 0.248037 -0.074627 
 0.239490 0.248619 -0.097015 
 0.239490 0.249200 -0.108209 
 0.240764 0.249200 -0.082090 
 0.240764 0.249782 -0.093284 
 0.240764 0.250363 -0.111940 
 0.242038 0.250363 -0.123134 
 0.242038 0.250945 -0.141791 
 0.242038 0.251527 -0.171642 
 0.242038 0.252108 -0.201493 
 0.243312 0.252108 -0.205224 
 0.243312 0.252690 -0.227612 
 0.243312 0.253271 -0.238806 
 0.244586 0.253271 -0.235075 
 0.244586 0.253853 -0.238806 
 0.244586 0.254434 -0.238806 
 0.245860 0.254434 -0.220149 
 0.245860 0.255016 -0.220149 
 0.245860 0.255598 -0.216418 
 0.247134 0.255598 -0.190299 
 0.247134 0.256179 -0.175373 
 0.247134 0.256761 -0.164179 
 0.248408 0.256761 -0.126866 
 0.248408 0.257342 -0.115672 
 0.248408 0.257924 -0.111940 
 0.248408 0.258505 -0.111940 
 0.249682 0.258505 -0.093284 
 0.249682 0.259087 -0.093284 
 0.249682 0.259669 -0.093284 
 0.250955 0.259669 -0.074627 
 0.250955 0.260250 -0.074627 
 0.250955 0.260832 -0.074627 
 0.252229 0.260832 -0.055970 
 0.252229 0.261413 -0.055970 
 0.252229 0.261995 -0.052239 
 0.253503 0.261995 -0.029851 
 0.253503 0.262576 -0.014925 
 0.253503 0.263158 0.007463 
 0.254777 0.263158 0.022388 
 0.254777 0.263739 0.041045 
 0.254777 0.264321 0.048507 
 0.254777 0.264903 0.070896 
 0.256051 0.264903 0.089552 
 0.256051 0.265484 0.097015 
 0.256051 0.266066 0.104478 
 0.257325 0.266066 0.119403 
 0.257325 0.266647 0.126866 
 0.257325 0.267229 0.138060 
 0.258599 0.267229 0.175373 
 0.258599 0.267810 0.182836 
 0.258599 0.268392 0.194030 
 0.259873 0.268392 0.216418 
 0.259873 0.268974 0.231343 
 0.259873 0.269555 0.238806 
 0.261146 0.269555 0.257463 
 0.261146 0.270137 0.272388 
 0.261146 0.270718 0.279851 
 0.262420 0.270718 0.287313 
 0.262420 0.271300 0.279851 
 0.262420 0.271881 0.276119 
 0.262420 0.272463 0.261194 
 0.263694 0.272463 0.223881 
 0.263694 0.273044 0.205224 
 0.263694 0.273626 0.182836 
 0.264968 0.273626 0.156716 
 0.264968 0.274208 0.138060 
 0.264968 0.274789 0.123134 
 0.266242 0.274789 0.108209 
 0.266242 0.275371 0.100746 
 0.266242 0.275952 0.085821 
 0.267516 0.275952 0.059701 
 0.267516 0.276534 0.048507 
 0.267516 0.277115 0.033582 
 0.268790 0.277115 0.007463 
 0.268790 0.277697 -0.014925 
 0.268790 0.278279 -0.011194 
 0.268790 0.278860 -0.003731 
 0.270064 0.278860 -0.029851 
 0.270064 0.279442 -0.022388 
 0.270064 0.280023 -0.011194 
 0.271338 0.280023 -0.033582 
 0.271338 0.280605 -0.029851 
 0.271338 0.281186 -0.026119 
 0.272611 0.281186 -0.052239 
 0.272611 0.281768 -0.063433 
 0.272611 0.282350 -0.078358 
 0.273885 0.282350 -0.097015 
 0.273885 0.282931 -0.108209 
 0.273885 0.283513 -0.126866 
 0.275159 0.283513 -0.145522 
 0.275159 0.284094 -0.145522 
 0.275159 0.284676 -0.141791 
 0.276433 0.284676 -0.179104 
 0.276433 0.285257 -0.179104 
 0.276433 0.285839 -0.175373 
 0.276433 0.286420 -0.160448 
 0.277707 0.286420 -0.186567 
 0.277707 0.287002 -0.171642 
 0.277707 0.287584 -0.141791 
 0.278981 0.287584 -0.160448 
 0.278981 0.288165 -0.141791 
 0.278981 0.288747 -0.111940 
 0.280255 0.288747 -0.126866 
 0.280255 0.289328 -0.115672 
 0.280255 0.289910 -0.119403 
 0.281529 0.289910 -0.149254 
 0.281529 0.290491 -0.152985 
 0.281529 0.291073 -0.164179 
 0.282803 0.291073 -0.182836 
 0.282803 0.291655 -0.186567 
 0.282803 0.292236 -0.179104 
 0.284076 0.292236 -0.201493 
 0.284076 0.292818 -0.186567 
 0.284076 0.293399 -0.152985 
 0.284076 0.293981 -0.141791 
 0.285350 0.293981 -0.152985 
 0.285350 0.294562 -0.126866 
 0.285350 0.295144 -0.104478 
 0.286624 0.295144 -0.111940 
 0.286624 0.295726 -0.082090 
 0.286624 0.296307 -0.067164 
 0.287898 0.296307 -0.104478 
 0.287898 0.296889 -0.111940 
 0.287898 0.297470 -0.119403 
 0.289172 0.297470 -0.149254 
 0.289172 0.298052 -0.156716 
 0.289172 0.298633 -0.167910 
 0.290446 0.298633 -0.194030 
 0.290446 0.299215 -0.212687 
 0.290446 0.299796 -0.223881 
 0.290446 0.300378 -0.223881 
 0.291720 0.300378 -0.242537 
 0.291720 0.300960 -0.242537 
 0.291720 0.301541 -0.242537 
 0.292994 0.301541 -0.257463 
 0.292994 0.302123 -0.257463 
 0.292994 0.302704 -0.257463 
 0.294268 0.302704 -0.272388 
 0.294268 0.303286 -0.276119 
 0.294268 0.303867 -0.279851 
 0.295541 0.303867 -0.305970 
 0.295541 0.304449 -0.309701 
 0.295541 0.305031 -0.317164 
 0.296815 0.305031 -0.328358 
 0.296815 0.305612 -0.335821 
 0.296815 0.306194 -0.350746 
 0.298089 0.306194 -0.361940 
 0.298089 0.306775 -0.380597 
 0.298089 0.307357 -0.406716 
 0.298089 0.307938 -0.429104 
 0.299363 0.307938 -0.436567 
 0.299363 0.308520 -0.462687 
 0.299363 0.309101 -0.481343 
 0.300637 0.309101 -0.488806 
 0.300637 0.309683 -0.511194 
 0.300637 0.310265 -0.526119 
 0.301911 0.310265 -0.533582 
 0.301911 0.310846 -0.552239 
 0.301911 0.311428 -0.559701 
 0.303185 0.311428 -0.559701 
 0.303185 0.312009 -0.570896 
 0.303185 0.312591 -0.589552 
 0.304459 0.312591 -0.589552 
 0.304459 0.313172 -0.626866 
 0.304459 0.313754 -0.641791 
 0.305732 0.313754 -0.645522 
 0.305732 0.314336 -0.664179 
 0.305732 0.314917 -0.690299 
 0.305732 0.315499 -0.705224 
 0.307006 0.315499 -0.705224 
 0.307006 0.316080 -0.716418 
 0.307006 0.316662 -0.716418 
 0.308280 0.316662 -0.716418 
 0.308280 0.317243 -0.716418 
 0.308280 0.317825 -0.716418 
 0.309554 0.317825 -0.716418 
 0.309554 0.318407 -0.716418 
 0.309554 0.318988 -0.716418 
 0.310828 0.318988 -0.716418 
 0.310828 0.319570 -0.716418 
 0.310828 0.320151 -0.716418 
 0.312102 0.320151 -0.716418 
 0.312102 0.320733 -0.716418 
 0.312102 0.321314 -0.716418 
 0.313376 0.321314 -0.716418 
 0.313376 0.321896 -0.716418 
 0.313376 0.322477 -0.716418 
 0.313376 0.323059 -0.716418 
 0.314650 0.323059 -0.716418 
 0.314650 0.323641 -0.716418 
 0.314650 0.324222 -0.716418 
 0.315924 0.324222 -0.716418 
 0.315924 0.324804 -0.716418 
 0.315924 0.325385 -0.716418 
 0.317197 0.325385 -0.716418 
 0.317197 0.325967 -0.716418 
 0.317197 0.326548 -0.716418 
 0.318471 0.326548 -0.716418 
 0.318471 0.327130 -0.716418 
 0.318471 0.327712 -0.716418 
 0.319745 0.327712 -0.716418 
 0.319745 0.328293 -0.716418 
 0.319745 0.328875 -0.716418 
 0.321019 0.328875 -0.716418 
 0.321019 0.329456 -0.712687 
 0.321019 0.330038 -0.701493 
 0.321019 0.330619 -0.686567 
 0.322293 0.330619 -0.686567 
 0.322293 0.331201 -0.675373 
 0.322293 0.331782 -0.664179 
 0.323567 0.331782 -0.664179 
 0.323567 0.332364 -0.649254 
 0.323567 0.332946 -0.641791 
 0.324841 0.332946 -0.641791 
 0.324841 0.333527 -0.615672 
 0.324841 0.334109 -0.600746 
 0.326115 0.334109 -0.600746 
 0.326115 0.334690 -0.574627 
 0.326115 0.335272 -0.563433 
 0.327389 0.335272 -0.563433 
 0.327389 0.335853 -0.544776 
 0.327389 0.336435 -0.529851 
 0.328662 0.336435 -0.533582 
 0.328662 0.337017 -0.526119 
 0.328662 0.337598 -0.518657 
 0.328662 0.338180 -0.511194 
 0.329936 0.338180 -0.529851 
 0.329936 0.338761 -0.514925 
 0.329936 0.339343 -0.466418 
 0.331210 0.339343 -0.473881 
 0.331210 0.339924 -0.455224 
 0.331210 0.340506 -0.406716 
 0.332484 0.340506 -0.425373 
 0.332484 0.341088 -0.395522 
 0.332484 0.341669 -0.373134 
 0.333758 0.341669 -0.399254 
 0.333758 0.342251 -0.369403 
 0.333758 0.342832 -0.328358 
 0.335032 0.342832 -0.380597 
 0.335032 0.343414 -0.332090 
 0.335032 0.343995 -0.324627 
 0.336306 0.344577 -0.332090 
 0.336306 0.345158 -0.313433 
 0.336306 0.345740 -0.302239 
 0.337580 0.345740 -0.335821 
 0.337580 0.346322 -0.335821 
 0.337580 0.346903 -0.339552 
 0.338854 0.346903 -0.365672 
 0.338854 0.347485 -0.365672 
 0.338854 0.348066 -0.358209 
 0.340127 0.348066 -0.373134 
 0.340127 0.348648 -0.373134 
 0.340127 0.349229 -0.365672 
 0.341401 0.349229 -0.384328 
 0.341401 0.349811 -0.380597 
 0.341401 0.350393 -0.376866 
 0.342675 0.350393 -0.399254 
 0.342675 0.350974 -0.388060 
 0.342675 0.351556 -0.380597 
 0.343949 0.352137 -0.391791 
 0.343949 0.352719 -0.388060 
 0.343949 0.353300 -0.388060 
 0.345223 0.353300 -0.406716 
 0.345223 0.353882 -0.406716 
 0.345223 0.354464 -0.402985 
 0.346497 0.354464 -0.421642 
 0.346497 0.355045 -0.414179 
 0.346497 0.355627 -0.399254 
 0.347771 0.355627 -0.414179 
 0.347771 0.356208 -0.399254 
 0.347771 0.356790 -0.384328 
 0.349045 0.356790 -0.399254 
 0.349045 0.357371 -0.391791 
 0.349045 0.357953 -0.380597 
 0.350318 0.357953 -0.395522 
 0.350318 0.358534 -0.376866 
 0.350318 0.359116 -0.347015 
 0.351592 0.359698 -0.324627 
 0.351592 0.360279 -0.298507 
 0.351592 0.360861 -0.268657 
 0.352866 0.360861 -0.268657 
 0.352866 0.361442 -0.246269 
 0.352866 0.362024 -0.216418 
 0.354140 0.362024 -0.227612 
 0.354140 0.362605 -0.216418 
 0.354140 0.363187 -0.201493 
 0.355414 0.363187 -0.212687 
 0.355414 0.363769 -0.208955 
 0.355414 0.364350 -0.197761 
 0.356688 0.364350 -0.212687 
 0.356688 0.364932 -0.205224 
 0.356688 0.365513 -0.194030 
 0.357962 0.365513 -0.205224 
 0.357962 0.366095 -0.194030 
 0.357962 0.366676 -0.167910 
 0.359236 0.367258 -0.156716 
 0.359236 0.367839 -0.138060 
 0.359236 0.368421 -0.123134 
 0.360510 0.368421 -0.123134 
 0.360510 0.369003 -0.104478 
 0.360510 0.369584 -0.078358 
 0.361783 0.369584 -0.070896 
 0.361783 0.370166 -0.052239 
 0.361783 0.370747 -0.011194 
 0.363057 0.370747 0.000000 
 0.363057 0.371329 0.022388 
 0.363057 0.371910 0.063433 
 0.364331 0.371910 0.059701 
 0.364331 0.372492 0.082090 
 0.364331 0.373074 0.100746 
 0.365605 0.373074 0.085821 
 0.365605 0.373655 0.097015 
 0.365605 0.374237 0.123134 
 0.366879 0.374237 0.093284 
 0.366879 0.374818 0.111940 
 0.366879 0.375400 0.138060 
 0.366879 0.375981 0.156716 
 0.368153 0.375981 0.152985 
 0.368153 0.376563 0.194030 
 0.368153 0.377145 0.216418 
 0.369427 0.377145 0.212687 
 0.369427 0.377726 0.235075 
 0.369427 0.378308 0.246269 
 0.370701 0.378308 0.223881 
 0.370701 0.378889 0.223881 
 0.370701 0.379471 0.216418 
 0.371975 0.379471 0.201493 
 0.371975 0.380052 0.194030 
 0.371975 0.380634 0.171642 
 0.373248 0.380634 0.145522 
 0.373248 0.381215 0.119403 
 0.373248 0.381797 0.085821 
 0.374522 0.382379 0.044776 
 0.374522 0.382960 0.041045 
 0.374522 0.383542 0.041045 
 0.375796 0.383542 0.007463 
 0.375796 0.384123 0.011194 
 0.375796 0.384705 0.022388 
 0.377070 0.384705 0.022388 
 0.377070 0.385286 0.078358 
 0.377070 0.385868 0.111940 
 0.378344 0.385868 0.115672 
 0.378344 0.386450 0.167910 
 0.378344 0.387031 0.205224 
 0.379618 0.387031 0.208955 
 0.379618 0.387613 0.238806 
 0.379618 0.388194 0.287313 
 0.380892 0.388194 0.291045 
 0.380892 0.388776 0.313433 
 0.380892 0.389357 0.350746 
 0.382166 0.389939 0.376866 
 0.382166 0.390521 0.402985 
 0.382166 0.391102 0.410448 
 0.383439 0.391102 0.380597 
 0.383439 0.391684 0.388060 
 0.383439 0.392265 0.395522 
 0.384713 0.392265 0.373134 
 0.384713 0.392847 0.410448 
 0.384713 0.393428 0.436567 
 0.385987 0.393428 0.429104 
 0.385987 0.394010 0.473881 
 0.385987 0.394591 0.488806 
 0.387261 0.394591 0.473881 
 0.387261 0.395173 0.492537 
 0.387261 0.395755 0.500000 
 0.388535 0.395755 0.485075 
 0.388535 0.396336 0.496269 
 0.388535 0.396918 0.488806 
 0.389809 0.396918 0.481343 
 0.389809 0.397499 0.455224 
 0.389809 0.398081 0.402985 
 0.389809 0.398662 0.373134 
 0.391083 0.398662 0.369403 
 0.391083 0.399244 0.320896 
 0.391083 0.399826 0.291045 
 0.392357 0.399826 0.283582 
 0.392357 0.400407 0.235075 
 0.392357 0.400989 0.205224 
 0.393631 0.400989 0.201493 
 0.393631 0.401570 0.164179 
 0.393631 0.402152 0.138060 
 0.394904 0.402152 0.138060 
 0.394904 0.402733 0.119403 
 0.394904 0.403315 0.111940 
 0.396178 0.403315 0.104478 
 0.396178 0.403896 0.089552 
 0.396178 0.404478 0.074627 
 0.397452 0.404478 0.063433 
 0.397452 0.405060 0.048507 
 0.397452 0.405641 0.041045 
 0.397452 0.406223 0.033582 
 0.398726 0.406223 0.026119 
 0.398726 0.406804 0.018657 
 0.398726 0.407386 0.011194 
 0.400000 0.407386 0.007463 
 0.400000 0.407967 -0.003731 
 0.400000 0.408549 -0.011194 
 0.401274 0.408549 -0.011194 
 0.401274 0.409131 -0.029851 
 0.401274 0.409712 -0.044776 
 0.402548 0.409712 -0.044776 
 0.402548 0.410294 -0.059701 
 0.402548 0.410875 -0.070896 
 0.403822 0.410875 -0.074627 
 0.403822 0.411457 -0.089552 
 0.403822 0.412038 -0.097015 
 0.405096 0.412038 -0.100746 
 0.405096 0.412620 -0.119403 
 0.405096 0.413202 -0.126866 
 0.405096 0.413783 -0.138060 
 0.406369 0.413783 -0.134328 
 0.406369 0.414365 -0.145522 
 0.406369 0.414946 -0.152985 
 0.407643 0.414946 -0.138060 
 0.407643 0.415528 -0.119403 
 0.407643 0.416109 -0.115672 
 0.408917 0.416109 -0.097015 
 0.408917 0.416691 -0.104478 
 0.408917 0.417272 -0.119403 
 0.410191 0.417272 -0.100746 
 0.410191 0.417854 -0.123134 
 0.410191 0.418436 -0.138060 
 0.411465 0.418436 -0.119403 
 0.411465 0.419017 -0.138060 
 0.411465 0.419599 -0.145522 
 0.412739 0.419599 -0.119403 
 0.412739 0.420180 -0.126866 
 0.412739 0.420762 -0.149254 
 0.412739 0.421343 -0.164179 
 0.414013 0.421343 -0.126866 
 0.414013 0.421925 -0.134328 
 0.414013 0.422507 -0.152985 
 0.415287 0.422507 -0.123134 
 0.415287 0.423088 -0.134328 
 0.415287 0.423670 -0.164179 
 0.416561 0.423670 -0.141791 
 0.416561 0.424251 -0.171642 
 0.416561 0.424833 -0.201493 
 0.417834 0.424833 -0.179104 
 0.417834 0.425414 -0.223881 
 0.417834 0.425996 -0.253731 
 0.419108 0.425996 -0.220149 
 0.419108 0.426577 -0.257463 
 0.419108 0.427159 -0.279851 
 0.420382 0.427159 -0.238806 
 0.420382 0.427741 -0.272388 
 0.420382 0.428322 -0.291045 
 0.420382 0.428904 -0.313433 
 0.421656 0.428904 -0.276119 
 0.421656 0.429485 -0.294776 
 0.421656 0.430067 -0.305970 
 0.422930 0.430067 -0.276119 
 0.422930 0.430648 -0.287313 
 0.422930 0.431230 -0.305970 
 0.424204 0.431230 -0.279851 
 0.424204 0.431812 -0.291045 
 0.424204 0.432393 -0.313433 
 0.425478 0.432393 -0.272388 
 0.425478 0.432975 -0.283582 
 0.425478 0.433556 -0.291045 
 0.426752 0.433556 -0.253731 
 0.426752 0.434138 -0.253731 
 0.426752 0.434719 -0.253731 
 0.428025 0.435301 -0.216418 
 0.428025 0.435883 -0.223881 
 0.428025 0.436464 -0.231343 
 0.429299 0.436464 -0.242537 
 0.429299 0.437046 -0.250000 
 0.429299 0.437627 -0.264925 
 0.430573 0.437627 -0.294776 
 0.430573 0.438209 -0.294776 
 0.430573 0.438790 -0.298507 
 0.431847 0.438790 -0.313433 
 0.431847 0.439372 -0.324627 
 0.431847 0.439953 -0.369403 
 0.433121 0.439953 -0.361940 
 0.433121 0.440535 -0.391791 
 0.433121 0.441117 -0.455224 
 0.434395 0.441117 -0.432836 
 0.434395 0.441698 -0.473881 
 0.434395 0.442280 -0.518657 
 0.434395 0.442861 -0.544776 
 0.435669 0.442861 -0.522388 
 0.435669 0.443443 -0.552239 
 0.435669 0.444024 -0.589552 
 0.436943 0.444024 -0.563433 
 0.436943 0.444606 -0.589552 
 0.436943 0.445188 -0.623134 
 0.438217 0.445188 -0.585821 
 0.438217 0.445769 -0.626866 
 0.438217 0.446351 -0.679104 
 0.439490 0.446351 -0.656716 
 0.439490 0.446932 -0.701493 
 0.439490 0.447514 -0.768657 
 0.440764 0.447514 -0.761194 
 0.440764 0.448095 -0.776119 
 0.440764 0.448677 -0.779851 
 0.442038 0.448677 -0.779851 
 0.442038 0.449259 -0.783582 
 0.442038 0.449840 -0.787313 
 0.442038 0.450422 -0.791045 
 0.443312 0.450422 -0.791045 
 0.443312 0.451003 -0.794776 
 0.443312 0.451585 -0.791045 
 0.444586 0.451585 -0.791045 
 0.444586 0.452166 -0.791045 
 0.444586 0.452748 -0.791045 
 0.445860 0.452748 -0.791045 
 0.445860 0.453329 -0.791045 
 0.445860 0.453911 -0.787313 
 0.447134 0.453911 -0.787313 
 0.447134 0.454493 -0.787313 
 0.447134 0.455074 -0.783582 
 0.448408 0.455074 -0.787313 
 0.448408 0.455656 -0.787313 
 0.448408 0.456237 -0.783582 
 0.449682 0.456819 -0.783582 
 0.449682 0.457400 -0.783582 
 0.449682 0.457982 -0.783582 
 0.450955 0.457982 -0.783582 
 0.450955 0.458564 -0.779851 
 0.450955 0.459145 -0.779851 
 0.452229 0.459145 -0.779851 
 0.452229 0.459727 -0.776119 
 0.452229 0.460308 -0.776119 
 0.453503 0.460308 -0.776119 
 0.453503 0.460890 -0.776119 
 0.453503 0.461471 -0.772388 
 0.454777 0.461471 -0.772388 
 0.454777 0.462053 -0.764925 
 0.454777 0.462634 -0.753731 
 0.456051 0.462634 -0.750000 
 0.456051 0.463216 -0.727612 
 0.456051 0.463798 -0.697761 
 0.456051 0.464379 -0.675373 
 0.457325 0.464379 -0.679104 
 0.457325 0.464961 -0.649254 
 0.457325 0.465542 -0.634328 
 0.458599 0.465542 -0.638060 
 0.458599 0.466124 -0.608209 
 0.458599 0.466705 -0.585821 
 0.459873 0.466705 -0.593284 
 0.459873 0.467287 -0.559701 
 0.459873 0.467869 -0.537313 
 0.461146 0.467869 -0.548507 
 0.461146 0.468450 -0.500000 
 0.461146 0.469032 -0.477612 
 0.462420 0.469032 -0.492537 
 0.462420 0.469613 -0.458955 
 0.462420 0.470195 -0.432836 
 0.463694 0.470195 -0.440299 
 0.463694 0.470776 -0.402985 
 0.463694 0.471358 -0.369403 
 0.463694 0.471940 -0.350746 
 0.464968 0.471940 -0.347015 
 0.464968 0.472521 -0.313433 
 0.464968 0.473103 -0.283582 
 0.466242 0.473103 -0.279851 
 0.466242 0.473684 -0.242537 
 0.466242 0.474266 -0.212687 
 0.467516 0.474266 -0.220149 
 0.467516 0.474847 -0.201493 
 0.467516 0.475429 -0.197761 
 0.468790 0.475429 -0.216418 
 0.468790 0.476010 -0.227612 
 0.468790 0.476592 -0.250000 
 0.470064 0.476592 -0.287313 
 0.470064 0.477174 -0.309701 
 0.470064 0.477755 -0.320896 
 0.470064 0.478337 -0.335821 
 0.471338 0.478337 -0.361940 
 0.471338 0.478918 -0.361940 
 0.471338 0.479500 -0.358209 
 0.472611 0.479500 -0.376866 
 0.472611 0.480081 -0.358209 
 0.472611 0.480663 -0.320896 
 0.473885 0.480663 -0.343284 
 0.473885 0.481245 -0.317164 
 0.473885 0.481826 -0.332090 
 0.475159 0.481826 -0.388060 
 0.475159 0.482408 -0.402985 
 0.475159 0.482989 -0.402985 
 0.476433 0.482989 -0.447761 
 0.476433 0.483571 -0.458955 
 0.476433 0.484152 -0.458955 
 0.477707 0.484734 -0.492537 
 0.477707 0.485315 -0.496269 
 0.477707 0.485897 -0.500000 
 0.478981 0.485897 -0.522388 
 0.478981 0.486479 -0.526119 
 0.478981 0.487060 -0.526119 
 0.480255 0.487060 -0.541045 
 0.480255 0.487642 -0.529851 
 0.480255 0.488223 -0.507463 
 0.481529 0.488223 -0.496269 
 0.481529 0.488805 -0.473881 
 0.481529 0.489386 -0.451493 
 0.482803 0.489386 -0.432836 
 0.482803 0.489968 -0.406716 
 0.482803 0.490550 -0.391791 
 0.484076 0.490550 -0.373134 
 0.484076 0.491131 -0.354478 
 0.484076 0.491713 -0.335821 
 0.484076 0.492294 -0.309701 
 0.485350 0.492294 -0.287313 
 0.485350 0.492876 -0.257463 
 0.485350 0.493457 -0.212687 
 0.486624 0.493457 -0.205224 
 0.486624 0.494039 -0.175373 
 0.486624 0.494621 -0.134328 
 0.487898 0.494621 -0.119403 
 0.487898 0.495202 -0.097015 
 0.487898 0.495784 -0.059701 
 0.489172 0.495784 -0.052239 
 0.489172 0.496365 -0.026119 
 0.489172 0.496947 0.011194 
 0.490446 0.496947 0.014925 
 0.490446 0.497528 0.037313 
 0.490446 0.498110 0.078358 
 0.490446 0.498691 0.097015 
 0.491720 0.498691 0.100746 
 0.491720 0.499273 0.123134 
 0.491720 0.499855 0.123134 
 0.492994 0.499855 0.123134 
 0.492994 0.500436 0.123134 
 0.492994 0.501018 0.123134 
 0.494268 0.501018 0.104478 
 0.494268 0.501599 0.097015 
 0.494268 0.502181 0.093284 
 0.495541 0.502181 0.067164 
 0.495541 0.502762 0.067164 
 0.495541 0.503344 0.059701 
 0.496815 0.503344 0.018657 
 0.496815 0.503926 0.014925 
 0.496815 0.504507 -0.003731 
 0.498089 0.504507 -0.037313 
 0.498089 0.505089 -0.055970 
 0.498089 0.505670 -0.074627 
 0.498089 0.506252 -0.085821 
 0.499363 0.506252 -0.115672 
 0.499363 0.506833 -0.130597 
 0.499363 0.507415 -0.141791 
 0.500637 0.507415 -0.179104 
 0.500637 0.507997 -0.190299 
 0.500637 0.508578 -0.212687 
 0.501911 0.508578 -0.250000 
 0.501911 0.509160 -0.264925 
 0.501911 0.509741 -0.298507 
 0.503185 0.509741 -0.324627 
 0.503185 0.510323 -0.343284 
 0.503185 0.510904 -0.369403 
 0.504459 0.510904 -0.399254 
 0.504459 0.511486 -0.417910 
 0.504459 0.512067 -0.440299 
 0.504459 0.512649 -0.455224 
 0.505732 0.512649 -0.462687 
 0.505732 0.513231 -0.455224 
 0.505732 0.513812 -0.432836 
 0.507006 0.513812 -0.421642 
 0.507006 0.514394 -0.384328 
 0.507006 0.514975 -0.365672 
 0.508280 0.514975 -0.354478 
 0.508280 0.515557 -0.324627 
 0.508280 0.516138 -0.302239 
 0.509554 0.516138 -0.287313 
 0.509554 0.516720 -0.264925 
 0.509554 0.517302 -0.227612 
 0.510828 0.517302 -0.205224 
 0.510828 0.517883 -0.182836 
 0.510828 0.518465 -0.149254 
 0.510828 0.519046 -0.126866 
 0.512102 0.519046 -0.108209 
 0.512102 0.519628 -0.078358 
 0.512102 0.520209 -0.055970 
 0.513376 0.520209 -0.037313 
 0.513376 0.520791 -0.011194 
 0.513376 0.521372 0.007463 
 0.514650 0.521372 0.018657 
 0.514650 0.521954 0.029851 
 0.514650 0.522536 0.037313 
 0.515924 0.522536 0.029851 
 0.515924 0.523117 0.048507 
 0.515924 0.523699 0.052239 
 0.517197 0.523699 0.044776 
 0.517197 0.524280 0.067164 
 0.517197 0.524862 0.070896 
 0.518471 0.524862 0.055970 
 0.518471 0.525443 0.067164 
 0.518471 0.526025 0.070896 
 0.518471 0.526607 0.078358 
 0.519745 0.526607 0.082090 
 0.519745 0.527188 0.104478 
 0.519745 0.527770 0.108209 
 0.521019 0.527770 0.123134 
 0.521019 0.528351 0.126866 
 0.521019 0.528933 0.123134 
 0.522293 0.528933 0.145522 
 0.522293 0.529514 0.149254 
 0.522293 0.530096 0.149254 
 0.523567 0.530096 0.175373 
 0.523567 0.530678 0.171642 
 0.523567 0.531259 0.167910 
 0.524841 0.531259 0.197761 
 0.524841 0.531841 0.194030 
 0.524841 0.532422 0.197761 
 0.524841 0.533004 0.208955 
 0.526115 0.533004 0.242537 
 0.526115 0.533585 0.250000 
 0.526115 0.534167 0.276119 
 0.527389 0.534167 0.347015 
 0.527389 0.534748 0.350746 
 0.527389 0.535330 0.358209 
 0.528662 0.535330 0.402985 
 0.528662 0.535912 0.410448 
 0.528662 0.536493 0.410448 
 0.529936 0.536493 0.447761 
 0.529936 0.537075 0.451493 
 0.529936 0.537656 0.466418 
 0.531210 0.537656 0.496269 
 0.531210 0.538238 0.507463 
 0.531210 0.538819 0.514925 
 0.531210 0.539401 0.548507 
 0.532484 0.539401 0.552239 
 0.532484 0.539983 0.567164 
 0.532484 0.540564 0.593284 
 0.533758 0.540564 0.597015 
 0.533758 0.541146 0.615672 
 0.533758 0.541727 0.652985 
 0.535032 0.541727 0.656716 
 0.535032 0.542309 0.682836 
 0.535032 0.542890 0.723881 
 0.536306 0.542890 0.731343 
 0.536306 0.543472 0.757463 
 0.536306 0.544054 0.794776 
 0.537580 0.544054 0.805970 
 0.537580 0.544635 0.828358 
 0.537580 0.545217 0.858209 
 0.538854 0.545217 0.869403 
 0.538854 0.545798 0.910448 
 0.538854 0.546380 0.925373 
 0.538854 0.546961 0.940299 
 0.540127 0.546961 0.947761 
 0.540127 0.547543 0.966418 
 0.540127 0.548124 0.981343 
 0.541401 0.548124 0.958955 
 0.541401 0.548706 0.955224 
 0.541401 0.549288 0.944030 
 0.542675 0.549288 0.925373 
 0.542675 0.549869 0.910448 
 0.542675 0.550451 0.869403 
 0.543949 0.550451 0.847015 
 0.543949 0.551032 0.817164 
 0.543949 0.551614 0.798507 
 0.545223 0.551614 0.772388 
 0.545223 0.552195 0.776119 
 0.545223 0.552777 0.779851 
 0.545223 0.553359 0.791045 
 0.546497 0.553359 0.772388 
 0.546497 0.553940 0.794776 
 0.546497 0.554522 0.820896 
 0.547771 0.554522 0.794776 
 0.547771 0.555103 0.813433 
 0.547771 0.555685 0.835821 
 0.549045 0.555685 0.832090 
 0.549045 0.556266 0.839552 
 0.549045 0.556848 0.832090 
 0.550318 0.556848 0.832090 
 0.550318 0.557429 0.832090 
 0.550318 0.558011 0.828358 
 0.551592 0.558011 0.839552 
 0.551592 0.558593 0.843284 
 0.551592 0.559174 0.843284 
 0.551592 0.559756 0.839552 
 0.552866 0.559756 0.861940 
 0.552866 0.560337 0.854478 
 0.552866 0.560919 0.854478 
 0.554140 0.560919 0.876866 
 0.554140 0.561500 0.880597 
 0.554140 0.562082 0.888060 
 0.555414 0.562082 0.910448 
 0.555414 0.562664 0.932836 
 0.555414 0.563245 0.951493 
 0.556688 0.563245 0.962687 
 0.556688 0.563827 0.977612 
 0.556688 0.564408 0.951493 
 0.557962 0.564408 0.932836 
 0.557962 0.564990 0.895522 
 0.557962 0.565571 0.805970 
 0.557962 0.566153 0.772388 
 0.559236 0.566153 0.783582 
 0.559236 0.566735 0.727612 
 0.559236 0.567316 0.701493 
 0.560510 0.567316 0.708955 
 0.560510 0.567898 0.671642 
 0.560510 0.568479 0.649254 
 0.561783 0.568479 0.660448 
 0.561783 0.569061 0.623134 
 0.561783 0.569642 0.593284 
 0.563057 0.569642 0.611940 
 0.563057 0.570224 0.570896 
 0.563057 0.570805 0.548507 
 0.564331 0.570805 0.570896 
 0.564331 0.571387 0.533582 
 0.564331 0.571969 0.503731 
 0.564331 0.572550 0.473881 
 0.565605 0.572550 0.485075 
 0.565605 0.573132 0.436567 
 0.565605 0.573713 0.410448 
 0.566879 0.573713 0.410448 
 0.566879 0.574295 0.369403 
 0.566879 0.574876 0.343284 
 0.568153 0.574876 0.335821 
 0.568153 0.575458 0.305970 
 0.568153 0.576040 0.283582 
 0.569427 0.576040 0.276119 
 0.569427 0.576621 0.250000 
 0.569427 0.577203 0.231343 
 0.570701 0.577203 0.223881 
 0.570701 0.577784 0.197761 
 0.570701 0.578366 0.179104 
 0.570701 0.578947 0.156716 
 0.571975 0.578947 0.160448 
 0.571975 0.579529 0.149254 
 0.571975 0.580110 0.141791 
 0.573248 0.580110 0.156716 
 0.573248 0.580692 0.152985 
 0.573248 0.581274 0.152985 
 0.574522 0.581274 0.179104 
 0.574522 0.581855 0.179104 
 0.574522 0.582437 0.175373 
 0.575796 0.582437 0.201493 
 0.575796 0.583018 0.197761 
 0.575796 0.583600 0.186567 
 0.577070 0.583600 0.182836 
 0.577070 0.584181 0.164179 
 0.577070 0.584763 0.141791 
 0.577070 0.585345 0.097015 
 0.578344 0.585345 0.063433 
 0.578344 0.585926 0.044776 
 0.578344 0.586508 0.007463 
 0.579618 0.586508 -0.007463 
 0.579618 0.587089 -0.026119 
 0.579618 0.587671 -0.037313 
 0.580892 0.587671 -0.018657 
 0.580892 0.588252 -0.022388 
 0.580892 0.588834 -0.022388 
 0.582166 0.588834 0.007463 
 0.582166 0.589416 0.000000 
 0.582166 0.589997 -0.011194 
 0.583439 0.589997 0.011194 
 0.583439 0.590579 -0.003731 
 0.583439 0.591160 -0.014925 
 0.583439 0.591742 -0.033582 
 0.584713 0.591742 -0.014925 
 0.584713 0.592323 -0.029851 
 0.584713 0.592905 -0.044776 
 0.585987 0.592905 -0.033582 
 0.585987 0.593486 -0.044776 
 0.585987 0.594068 -0.070896 
 0.587261 0.594068 -0.067164 
 0.587261 0.594650 -0.085821 
 0.587261 0.595231 -0.115672 
 0.588535 0.595231 -0.126866 
 0.588535 0.595813 -0.149254 
 0.588535 0.596394 -0.190299 
 0.589809 0.596394 -0.186567 
 0.589809 0.596976 -0.212687 
 0.589809 0.597557 -0.235075 
 0.589809 0.598139 -0.246269 
 0.591083 0.598139 -0.238806 
 0.591083 0.598721 -0.231343 
 0.591083 0.599302 -0.227612 
 0.592357 0.599302 -0.231343 
 0.592357 0.599884 -0.212687 
 0.592357 0.600465 -0.197761 
 0.593631 0.600465 -0.205224 
 0.593631 0.601047 -0.190299 
 0.593631 0.601628 -0.167910 
 0.594904 0.601628 -0.171642 
 0.594904 0.602210 -0.152985 
 0.594904 0.602792 -0.119403 
 0.596178 0.602792 -0.119403 
 0.596178 0.603373 -0.100746 
 0.596178 0.603955 -0.074627 
 0.596178 0.604536 -0.059701 
 0.597452 0.604536 -0.052239 
 0.597452 0.605118 -0.029851 
 0.597452 0.605699 -0.011194 
 0.598726 0.605699 -0.003731 
 0.598726 0.606281 0.022388 
 0.598726 0.606862 0.037313 
 0.600000 0.606862 0.044776 
 0.600000 0.607444 0.067164 
 0.600000 0.608026 0.082090 
 0.601274 0.608026 0.089552 
 0.601274 0.608607 0.111940 
 0.601274 0.609189 0.123134 
 0.602548 0.609189 0.134328 
 0.602548 0.609770 0.149254 
 0.602548 0.610352 0.171642 
 0.602548 0.610933 0.182836 
 0.603822 0.610933 0.190299 
 0.603822 0.611515 0.212687 
 0.603822 0.612097 0.223881 
 0.605096 0.612097 0.235075 
 0.605096 0.612678 0.257463 
 0.605096 0.613260 0.272388 
 0.606369 0.613260 0.279851 
 0.606369 0.613841 0.302239 
 0.606369 0.614423 0.317164 
 0.607643 0.614423 0.324627 
 0.607643 0.615004 0.350746 
 0.607643 0.615586 0.369403 
 0.608917 0.615586 0.376866 
 0.608917 0.616167 0.402985 
 0.608917 0.616749 0.414179 
 0.608917 0.617331 0.432836 
 0.610191 0.617331 0.447761 
 0.610191 0.617912 0.455224 
 0.610191 0.618494 0.455224 
 0.611465 0.618494 0.477612 
 0.611465 0.619075 0.477612 
 0.611465 0.619657 0.481343 
 0.612739 0.619657 0.507463 
 0.612739 0.620238 0.511194 
 0.612739 0.620820 0.511194 
 0.614013 0.620820 0.533582 
 0.614013 0.621402 0.537313 
 0.614013 0.621983 0.555970 
 0.615287 0.621983 0.574627 
 0.615287 0.622565 0.604478 
 0.615287 0.623146 0.619403 
 0.615287 0.623728 0.623134 
 0.616561 0.623728 0.634328 
 0.616561 0.624309 0.626866 
 0.616561 0.624891 0.597015 
 0.617834 0.624891 0.604478 
 0.617834 0.625473 0.578358 
 0.617834 0.626054 0.541045 
 0.619108 0.626054 0.526119 
 0.619108 0.626636 0.496269 
 0.619108 0.627217 0.440299 
 0.620382 0.627217 0.425373 
 0.620382 0.627799 0.395522 
 0.620382 0.628380 0.365672 
 0.621656 0.628380 0.369403 
 0.621656 0.628962 0.335821 
 0.621656 0.629543 0.317164 
 0.621656 0.630125 0.287313 
 0.622930 0.630125 0.313433 
 0.622930 0.630707 0.291045 
 0.622930 0.631288 0.253731 
 0.624204 0.631288 0.276119 
 0.624204 0.631870 0.242537 
 0.624204 0.632451 0.201493 
 0.625478 0.632451 0.216418 
 0.625478 0.633033 0.186567 
 0.625478 0.633614 0.134328 
 0.626752 0.633614 0.145522 
 0.626752 0.634196 0.115672 
 0.626752 0.634778 0.085821 
 0.628025 0.634778 0.108209 
 0.628025 0.635359 0.097015 
 0.628025 0.635941 0.078358 
 0.629299 0.635941 0.104478 
 0.629299 0.636522 0.097015 
 0.629299 0.637104 0.089552 
 0.629299 0.637685 0.082090 
 0.630573 0.637685 0.111940 
 0.630573 0.638267 0.104478 
 0.630573 0.638849 0.093284 
 0.631847 0.638849 0.119403 
 0.631847 0.639430 0.108209 
 0.631847 0.640012 0.093284 
 0.633121 0.640012 0.097015 
 0.633121 0.640593 0.078358 
 0.633121 0.641175 0.052239 
 0.634395 0.641175 0.048507 
 0.634395 0.641756 0.029851 
 0.634395 0.642338 0.000000 
 0.635669 0.642338 -0.007463 
 0.635669 0.642919 -0.026119 
 0.635669 0.643501 -0.063433 
 0.635669 0.644083 -0.089552 
 0.636943 0.644083 -0.097015 
 0.636943 0.644664 -0.130597 
 0.636943 0.645246 -0.138060 
 0.638217 0.645246 -0.126866 
 0.638217 0.645827 -0.111940 
 0.638217 0.646409 -0.100746 
 0.639490 0.646409 -0.074627 
 0.639490 0.646990 -0.063433 
 0.639490 0.647572 -0.048507 
 0.640764 0.647572 -0.026119 
 0.640764 0.648154 -0.037313 
 0.640764 0.648735 -0.067164 
 0.642038 0.648735 -0.067164 
 0.642038 0.649317 -0.093284 
 0.642038 0.649898 -0.134328 
 0.642038 0.650480 -0.167910 
 0.643312 0.650480 -0.175373 
 0.643312 0.651061 -0.223881 
 0.643312 0.651643 -0.257463 
 0.644586 0.651643 -0.268657 
 0.644586 0.652224 -0.305970 
 0.644586 0.652806 -0.305970 
 0.645860 0.652806 -0.302239 
 0.645860 0.653388 -0.298507 
 0.645860 0.653969 -0.291045 
 0.647134 0.653969 -0.283582 
 0.647134 0.654551 -0.272388 
 0.647134 0.655132 -0.257463 
 0.648408 0.655132 -0.242537 
 0.648408 0.655714 -0.212687 
 0.648408 0.656295 -0.194030 
 0.648408 0.656877 -0.175373 
 0.649682 0.656877 -0.160448 
 0.649682 0.657459 -0.126866 
 0.649682 0.658040 -0.104478 
 0.650955 0.658040 -0.097015 
 0.650955 0.658622 -0.063433 
 0.650955 0.659203 -0.041045 
 0.652229 0.659203 -0.041045 
 0.652229 0.659785 -0.011194 
 0.652229 0.660366 0.007463 
 0.653503 0.660366 -0.003731 
 0.653503 0.660948 0.018657 
 0.653503 0.661530 0.037313 
 0.654777 0.661530 0.018657 
 0.654777 0.662111 0.044776 
 0.654777 0.662693 0.063433 
 0.656051 0.663274 0.070896 
 0.656051 0.663856 0.085821 
 0.656051 0.664437 0.111940 
 0.657325 0.664437 0.093284 
 0.657325 0.665019 0.108209 
 0.657325 0.665600 0.123134 
 0.658599 0.665600 0.104478 
 0.658599 0.666182 0.126866 
 0.658599 0.666764 0.141791 
 0.659873 0.666764 0.126866 
 0.659873 0.667345 0.156716 
 0.659873 0.667927 0.182836 
 0.661146 0.667927 0.179104 
 0.661146 0.668508 0.220149 
 0.661146 0.669090 0.246269 
 0.662420 0.669090 0.242537 
 0.662420 0.669671 0.287313 
 0.662420 0.670253 0.317164 
 0.662420 0.670835 0.354478 
 0.663694 0.670835 0.361940 
 0.663694 0.671416 0.384328 
 0.663694 0.671998 0.402985 
 0.664968 0.671998 0.414179 
 0.664968 0.672579 0.414179 
 0.664968 0.673161 0.391791 
 0.666242 0.673161 0.410448 
 0.666242 0.673742 0.388060 
 0.666242 0.674324 0.350746 
 0.667516 0.674324 0.369403 
 0.667516 0.674905 0.343284 
 0.667516 0.675487 0.324627 
 0.668790 0.675487 0.339552 
 0.668790 0.676069 0.305970 
 0.668790 0.676650 0.287313 
 0.668790 0.677232 0.253731 
 0.670064 0.677232 0.257463 
 0.670064 0.677813 0.227612 
 0.670064 0.678395 0.182836 
 0.671338 0.678395 0.182836 
 0.671338 0.678976 0.149254 
 0.671338 0.679558 0.097015 
 0.672611 0.679558 0.104478 
 0.672611 0.680140 0.063433 
 0.672611 0.680721 0.014925 
 0.673885 0.680721 0.014925 
 0.673885 0.681303 0.014925 
 0.673885 0.681884 0.029851 
 0.675159 0.681884 0.063433 
 0.675159 0.682466 0.074627 
 0.675159 0.683047 0.089552 
 0.676433 0.683629 0.123134 
 0.676433 0.684211 0.123134 
 0.676433 0.684792 0.115672 
 0.677707 0.684792 0.141791 
 0.677707 0.685374 0.134328 
 0.677707 0.685955 0.111940 
 0.678981 0.685955 0.134328 
 0.678981 0.686537 0.115672 
 0.678981 0.687118 0.093284 
 0.680255 0.687118 0.104478 
 0.680255 0.687700 0.085821 
 0.680255 0.688281 0.055970 
 0.681529 0.688281 0.059701 
 0.681529 0.688863 0.037313 
 0.681529 0.689445 0.003731 
 0.682803 0.689445 0.011194 
 0.682803 0.690026 -0.007463 
 0.682803 0.690608 -0.003731 
 0.682803 0.691189 0.007463 
 0.684076 0.691189 0.022388 
 0.684076 0.691771 0.055970 
 0.684076 0.692352 0.078358 
 0.685350 0.692352 0.097015 
 0.685350 0.692934 0.134328 
 0.685350 0.693516 0.156716 
 0.686624 0.693516 0.171642 
 0.686624 0.694097 0.194030 
 0.686624 0.694679 0.205224 
 0.687898 0.694679 0.223881 
 0.687898 0.695260 0.223881 
 0.687898 0.695842 0.223881 
 0.689172 0.695842 0.246269 
 0.689172 0.696423 0.250000 
 0.689172 0.697005 0.257463 
 0.689172 0.697587 0.268657 
 0.690446 0.697587 0.283582 
 0.690446 0.698168 0.302239 
 0.690446 0.698750 0.332090 
 0.691720 0.698750 0.332090 
 0.691720 0.699331 0.369403 
 0.691720 0.699913 0.399254 
 0.692994 0.699913 0.391791 
 0.692994 0.700494 0.429104 
 0.692994 0.701076 0.462687 
 0.694268 0.701076 0.462687 
 0.694268 0.701657 0.518657 
 0.694268 0.702239 0.552239 
 0.695541 0.702239 0.559701 
 0.695541 0.702821 0.589552 
 0.695541 0.703402 0.638060 
 0.696815 0.703402 0.641791 
 0.696815 0.703984 0.667910 
 0.696815 0.704565 0.701493 
 0.696815 0.705147 0.723881 
 0.698089 0.705147 0.731343 
 0.698089 0.705728 0.757463 
 0.698089 0.706310 0.750000 
 0.699363 0.706310 0.753731 
 0.699363 0.706892 0.738806 
 0.699363 0.707473 0.738806 
 0.700637 0.707473 0.723881 
 0.700637 0.708055 0.708955 
 0.700637 0.708636 0.694030 
 0.701911 0.708636 0.671642 
 0.701911 0.709218 0.641791 
 0.701911 0.709799 0.623134 
 0.703185 0.709799 0.600746 
 0.703185 0.710381 0.563433 
 0.703185 0.710962 0.541045 
 0.704459 0.710962 0.511194 
 0.704459 0.711544 0.466418 
 0.704459 0.712126 0.440299 
 0.704459 0.712707 0.432836 
 0.705732 0.712707 0.425373 
 0.705732 0.713289 0.414179 
 0.705732 0.713870 0.399254 
 0.707006 0.713870 0.373134 
 0.707006 0.714452 0.354478 
 0.707006 0.715033 0.354478 
 0.708280 0.715033 0.335821 
 0.708280 0.715615 0.339552 
 0.708280 0.716197 0.339552 
 0.709554 0.716197 0.309701 
 0.709554 0.716778 0.302239 
 0.709554 0.717360 0.302239 
 0.710828 0.717360 0.264925 
 0.710828 0.717941 0.287313 
 0.710828 0.718523 0.302239 
 0.712102 0.718523 0.272388 
 0.712102 0.719104 0.294776 
 0.712102 0.719686 0.298507 
 0.712102 0.720268 0.291045 
 0.713376 0.720268 0.272388 
 0.713376 0.720849 0.261194 
 0.713376 0.721431 0.250000 
 0.714650 0.721431 0.227612 
 0.714650 0.722012 0.212687 
 0.714650 0.722594 0.201493 
 0.715924 0.722594 0.182836 
 0.715924 0.723175 0.167910 
 0.715924 0.723757 0.156716 
 0.717197 0.723757 0.134328 
 0.717197 0.724338 0.119403 
 0.717197 0.724920 0.104478 
 0.718471 0.724920 0.085821 
 0.718471 0.725502 0.070896 
 0.718471 0.726083 0.055970 
 0.719745 0.726083 0.033582 
 0.719745 0.726665 0.011194 
 0.719745 0.727246 -0.003731 
 0.719745 0.727828 -0.026119 
 0.721019 0.727828 -0.048507 
 0.721019 0.728409 -0.067164 
 0.721019 0.728991 -0.089552 
 0.722293 0.728991 -0.119403 
 0.722293 0.729573 -0.126866 
 0.722293 0.730154 -0.134328 
 0.723567 0.730154 -0.138060 
 0.723567 0.730736 -0.145522 
 0.723567 0.731317 -0.152985 
 0.724841 0.731317 -0.141791 
 0.724841 0.731899 -0.141791 
 0.724841 0.732480 -0.141791 
 0.726115 0.732480 -0.123134 
 0.726115 0.733062 -0.119403 
 0.726115 0.733644 -0.115672 
 0.727389 0.733644 -0.085821 
 0.727389 0.734225 -0.082090 
 0.727389 0.734807 -0.082090 
 0.727389 0.735388 -0.085821 
 0.728662 0.735388 -0.055970 
 0.728662 0.735970 -0.059701 
 0.728662 0.736551 -0.067164 
 0.729936 0.736551 -0.037313 
 0.729936 0.737133 -0.052239 
 0.729936 0.737714 -0.078358 
 0.731210 0.737714 -0.059701 
 0.731210 0.738296 -0.089552 
 0.731210 0.738878 -0.130597 
 0.732484 0.738878 -0.126866 
 0.732484 0.739459 -0.149254 
 0.732484 0.740041 -0.167910 
 0.733758 0.740041 -0.156716 
 0.733758 0.740622 -0.164179 
 0.733758 0.741204 -0.149254 
 0.735032 0.741785 -0.100746 
 0.735032 0.742367 -0.089552 
 0.735032 0.742949 -0.089552 
 0.736306 0.742949 -0.063433 
 0.736306 0.743530 -0.070896 
 0.736306 0.744112 -0.093284 
 0.737580 0.744112 -0.067164 
 0.737580 0.744693 -0.085821 
 0.737580 0.745275 -0.115672 
 0.738854 0.745275 -0.093284 
 0.738854 0.745856 -0.115672 
 0.738854 0.746438 -0.160448 
 0.740127 0.746438 -0.138060 
 0.740127 0.747019 -0.164179 
 0.740127 0.747601 -0.197761 
 0.741401 0.747601 -0.182836 
 0.741401 0.748183 -0.197761 
 0.741401 0.748764 -0.208955 
 0.741401 0.749346 -0.220149 
 0.742675 0.749346 -0.197761 
 0.742675 0.749927 -0.212687 
 0.742675 0.750509 -0.231343 
 0.743949 0.750509 -0.212687 
 0.743949 0.751090 -0.223881 
 0.743949 0.751672 -0.246269 
 0.745223 0.751672 -0.227612 
 0.745223 0.752254 -0.238806 
 0.745223 0.752835 -0.257463 
 0.746497 0.752835 -0.238806 
 0.746497 0.753417 -0.250000 
 0.746497 0.753998 -0.264925 
 0.747771 0.753998 -0.250000 
 0.747771 0.754580 -0.261194 
 0.747771 0.755161 -0.268657 
 0.749045 0.755161 -0.253731 
 0.749045 0.755743 -0.257463 
 0.749045 0.756325 -0.264925 
 0.749045 0.756906 -0.276119 
 0.750318 0.756906 -0.257463 
 0.750318 0.757488 -0.276119 
 0.750318 0.758069 -0.291045 
 0.751592 0.758069 -0.272388 
 0.751592 0.758651 -0.287313 
 0.751592 0.759232 -0.313433 
 0.752866 0.759232 -0.287313 
 0.752866 0.759814 -0.305970 
 0.752866 0.760395 -0.328358 
 0.754140 0.760395 -0.309701 
 0.754140 0.760977 -0.328358 
 0.754140 0.761559 -0.350746 
 0.755414 0.761559 -0.335821 
 0.755414 0.762140 -0.350746 
 0.755414 0.762722 -0.361940 
 0.755414 0.763303 -0.361940 
 0.756688 0.763303 -0.361940 
 0.756688 0.763885 -0.361940 
 0.756688 0.764466 -0.361940 
 0.757962 0.764466 -0.361940 
 0.757962 0.765048 -0.361940 
 0.757962 0.765630 -0.350746 
 0.759236 0.765630 -0.358209 
 0.759236 0.766211 -0.339552 
 0.759236 0.766793 -0.324627 
 0.760510 0.766793 -0.332090 
 0.760510 0.767374 -0.313433 
 0.760510 0.767956 -0.302239 
 0.761783 0.767956 -0.313433 
 0.761783 0.768537 -0.298507 
 0.761783 0.769119 -0.279851 
 0.763057 0.769119 -0.291045 
 0.763057 0.769700 -0.279851 
 0.763057 0.770282 -0.257463 
 0.763057 0.770864 -0.246269 
 0.764331 0.770864 -0.261194 
 0.764331 0.771445 -0.246269 
 0.764331 0.772027 -0.238806 
 0.765605 0.772027 -0.257463 
 0.765605 0.772608 -0.246269 
 0.765605 0.773190 -0.231343 
 0.766879 0.773190 -0.250000 
 0.766879 0.773771 -0.227612 
 0.766879 0.774353 -0.212687 
 0.768153 0.774353 -0.231343 
 0.768153 0.774935 -0.205224 
 0.768153 0.775516 -0.179104 
 0.769427 0.775516 -0.197761 
 0.769427 0.776098 -0.160448 
 0.769427 0.776679 -0.141791 
 0.769427 0.777261 -0.119403 
 0.770701 0.777261 -0.138060 
 0.770701 0.777842 -0.104478 
 0.770701 0.778424 -0.078358 
 0.771975 0.778424 -0.100746 
 0.771975 0.779006 -0.067164 
 0.771975 0.779587 -0.048507 
 0.773248 0.779587 -0.070896 
 0.773248 0.780169 -0.055970 
 0.773248 0.780750 -0.044776 
 0.774522 0.780750 -0.070896 
 0.774522 0.781332 -0.052239 
 0.774522 0.781913 -0.033582 
 0.775796 0.781913 -0.055970 
 0.775796 0.782495 -0.022388 
 0.775796 0.783076 -0.003731 
 0.775796 0.783658 0.026119 
 0.777070 0.783658 0.007463 
 0.777070 0.784240 0.029851 
 0.777070 0.784821 0.052239 
 0.778344 0.784821 0.022388 
 0.778344 0.785403 0.022388 
 0.778344 0.785984 0.000000 
 0.779618 0.785984 -0.029851 
 0.779618 0.786566 -0.048507 
 0.779618 0.787147 -0.074627 
 0.780892 0.787147 -0.104478 
 0.780892 0.787729 -0.145522 
 0.780892 0.788311 -0.164179 
 0.782166 0.788311 -0.194030 
 0.782166 0.788892 -0.205224 
 0.782166 0.789474 -0.216418 
 0.783439 0.790055 -0.261194 
 0.783439 0.790637 -0.268657 
 0.783439 0.791218 -0.283582 
 0.784713 0.791218 -0.309701 
 0.784713 0.791800 -0.320896 
 0.784713 0.792382 -0.343284 
 0.785987 0.792382 -0.376866 
 0.785987 0.792963 -0.391791 
 0.785987 0.793545 -0.410448 
 0.787261 0.793545 -0.444030 
 0.787261 0.794126 -0.458955 
 0.787261 0.794708 -0.481343 
 0.788535 0.794708 -0.518657 
 0.788535 0.795289 -0.533582 
 0.788535 0.795871 -0.537313 
 0.789809 0.795871 -0.548507 
 0.789809 0.796452 -0.548507 
 0.789809 0.797034 -0.548507 
 0.789809 0.797616 -0.548507 
 0.791083 0.797616 -0.548507 
 0.791083 0.798197 -0.548507 
 0.791083 0.798779 -0.544776 
 0.792357 0.798779 -0.526119 
 0.792357 0.799360 -0.522388 
 0.792357 0.799942 -0.514925 
 0.793631 0.799942 -0.481343 
 0.793631 0.800523 -0.477612 
 0.793631 0.801105 -0.477612 
 0.794904 0.801105 -0.458955 
 0.794904 0.801687 -0.458955 
 0.794904 0.802268 -0.466418 
 0.796178 0.802268 -0.444030 
 0.796178 0.802850 -0.447761 
 0.796178 0.803431 -0.451493 
 0.796178 0.804013 -0.455224 
 0.797452 0.804013 -0.432836 
 0.797452 0.804594 -0.436567 
 0.797452 0.805176 -0.444030 
 0.798726 0.805176 -0.421642 
 0.798726 0.805757 -0.432836 
 0.798726 0.806339 -0.451493 
 0.800000 0.806339 -0.440299 
 0.800000 0.806921 -0.466418 
 0.800000 0.807502 -0.511194 
 0.801274 0.807502 -0.511194 
 0.801274 0.808084 -0.544776 
 0.801274 0.808665 -0.585821 
 0.802548 0.808665 -0.585821 
 0.802548 0.809247 -0.585821 
 0.802548 0.809828 -0.585821 
 0.803822 0.810410 -0.574627 
 0.803822 0.810992 -0.541045 
 0.803822 0.811573 -0.518657 
 0.805096 0.811573 -0.518657 
 0.805096 0.812155 -0.485075 
 0.805096 0.812736 -0.458955 
 0.806369 0.812736 -0.466418 
 0.806369 0.813318 -0.436567 
 0.806369 0.813899 -0.417910 
 0.807643 0.813899 -0.429104 
 0.807643 0.814481 -0.402985 
 0.807643 0.815063 -0.384328 
 0.808917 0.815063 -0.402985 
 0.808917 0.815644 -0.384328 
 0.808917 0.816226 -0.361940 
 0.810191 0.816226 -0.384328 
 0.810191 0.816807 -0.373134 
 0.810191 0.817389 -0.358209 
 0.810191 0.817970 -0.343284 
 0.811465 0.817970 -0.376866 
 0.811465 0.818552 -0.350746 
 0.811465 0.819133 -0.332090 
 0.812739 0.819133 -0.358209 
 0.812739 0.819715 -0.332090 
 0.812739 0.820297 -0.313433 
 0.814013 0.820297 -0.339552 
 0.814013 0.820878 -0.324627 
 0.814013 0.821460 -0.317164 
 0.815287 0.821460 -0.347015 
 0.815287 0.822041 -0.343284 
 0.815287 0.822623 -0.350746 
 0.816561 0.822623 -0.373134 
 0.816561 0.823204 -0.395522 
 0.816561 0.823786 -0.414179 
 0.816561 0.824368 -0.429104 
 0.817834 0.824368 -0.447761 
 0.817834 0.824949 -0.447761 
 0.817834 0.825531 -0.436567 
 0.819108 0.825531 -0.458955 
 0.819108 0.826112 -0.451493 
 0.819108 0.826694 -0.447761 
 0.820382 0.826694 -0.473881 
 0.820382 0.827275 -0.477612 
 0.820382 0.827857 -0.477612 
 0.821656 0.827857 -0.507463 
 0.821656 0.828438 -0.511194 
 0.821656 0.829020 -0.518657 
 0.822930 0.829020 -0.544776 
 0.822930 0.829602 -0.559701 
 0.822930 0.830183 -0.570896 
 0.824204 0.830183 -0.589552 
 0.824204 0.830765 -0.589552 
 0.824204 0.831346 -0.559701 
 0.824204 0.831928 -0.507463 
 0.825478 0.831928 -0.522388 
 0.825478 0.832509 -0.488806 
 0.825478 0.833091 -0.462687 
 0.826752 0.833091 -0.481343 
 0.826752 0.833673 -0.470149 
 0.826752 0.834254 -0.462687 
 0.828025 0.834254 -0.481343 
 0.828025 0.834836 -0.492537 
 0.828025 0.835417 -0.507463 
 0.829299 0.835417 -0.526119 
 0.829299 0.835999 -0.552239 
 0.829299 0.836580 -0.570896 
 0.830573 0.836580 -0.589552 
 0.830573 0.837162 -0.600746 
 0.830573 0.837744 -0.611940 
 0.830573 0.838325 -0.630597 
 0.831847 0.838325 -0.652985 
 0.831847 0.838907 -0.660448 
 0.831847 0.839488 -0.660448 
 0.833121 0.839488 -0.660448 
 0.833121 0.840070 -0.652985 
 0.833121 0.840651 -0.645522 
 0.834395 0.840651 -0.626866 
 0.834395 0.841233 -0.626866 
 0.834395 0.841814 -0.626866 
 0.835669 0.841814 -0.604478 
 0.835669 0.842396 -0.604478 
 0.835669 0.842978 -0.611940 
 0.836943 0.842978 -0.589552 
 0.836943 0.843559 -0.608209 
 0.836943 0.844141 -0.623134 
 0.838217 0.844141 -0.604478 
 0.838217 0.844722 -0.623134 
 0.838217 0.845304 -0.638060 
 0.838217 0.845885 -0.656716 
 0.839490 0.845885 -0.638060 
 0.839490 0.846467 -0.649254 
 0.839490 0.847049 -0.660448 
 0.840764 0.847049 -0.641791 
 0.840764 0.847630 -0.645522 
 0.840764 0.848212 -0.652985 
 0.842038 0.848212 -0.630597 
 0.842038 0.848793 -0.630597 
 0.842038 0.849375 -0.619403 
 0.843312 0.849375 -0.597015 
 0.843312 0.849956 -0.585821 
 0.843312 0.850538 -0.563433 
 0.844586 0.850538 -0.541045 
 0.844586 0.851120 -0.526119 
 0.844586 0.851701 -0.503731 
 0.844586 0.852283 -0.473881 
 0.845860 0.852283 -0.447761 
 0.845860 0.852864 -0.410448 
 0.845860 0.853446 -0.361940 
 0.847134 0.853446 -0.350746 
 0.847134 0.854027 -0.343284 
 0.847134 0.854609 -0.358209 
 0.848408 0.854609 -0.347015 
 0.848408 0.855190 -0.369403 
 0.848408 0.855772 -0.402985 
 0.849682 0.855772 -0.395522 
 0.849682 0.856354 -0.417910 
 0.849682 0.856935 -0.451493 
 0.850955 0.856935 -0.440299 
 0.850955 0.857517 -0.455224 
 0.850955 0.858098 -0.451493 
 0.850955 0.858680 -0.432836 
 0.852229 0.858680 -0.410448 
 0.852229 0.859261 -0.391791 
 0.852229 0.859843 -0.388060 
 0.853503 0.859843 -0.361940 
 0.853503 0.860425 -0.354478 
 0.853503 0.861006 -0.358209 
 0.854777 0.861006 -0.324627 
 0.854777 0.861588 -0.328358 
 0.854777 0.862169 -0.339552 
 0.856051 0.862169 -0.309701 
 0.856051 0.862751 -0.317164 
 0.856051 0.863332 -0.305970 
 0.857325 0.863332 -0.287313 
 0.857325 0.863914 -0.264925 
 0.857325 0.864495 -0.231343 
 0.858599 0.864495 -0.212687 
 0.858599 0.865077 -0.186567 
 0.858599 0.865659 -0.145522 
 0.858599 0.866240 -0.123134 
 0.859873 0.866240 -0.104478 
 0.859873 0.866822 -0.070896 
 0.859873 0.867403 -0.044776 
 0.861146 0.867403 -0.029851 
 0.861146 0.867985 0.018657 
 0.861146 0.868566 0.033582 
 0.862420 0.868566 0.055970 
 0.862420 0.869148 0.048507 
 0.862420 0.869730 0.033582 
 0.863694 0.869730 0.067164 
 0.863694 0.870311 0.044776 
 0.863694 0.870893 0.029851 
 0.864968 0.870893 0.059701 
 0.864968 0.871474 0.048507 
 0.864968 0.872056 0.041045 
 0.866242 0.872056 0.078358 
 0.866242 0.872637 0.078358 
 0.866242 0.873219 0.078358 
 0.866242 0.873801 0.074627 
 0.867516 0.873801 0.111940 
 0.867516 0.874382 0.108209 
 0.867516 0.874964 0.111940 
 0.868790 0.874964 0.156716 
 0.868790 0.875545 0.175373 
 0.868790 0.876127 0.194030 
 0.870064 0.876127 0.238806 
 0.870064 0.876708 0.250000 
 0.870064 0.877290 0.231343 
 0.871338 0.877290 0.223881 
 0.871338 0.877871 0.175373 
 0.871338 0.878453 0.138060 
 0.872611 0.878453 0.123134 
 0.872611 0.879035 0.067164 
 0.872611 0.879616 0.033582 
 0.873885 0.880198 -0.007463 
 0.873885 0.880779 -0.048507 
 0.873885 0.881361 -0.074627 
 0.875159 0.881361 -0.085821 
 0.875159 0.881942 -0.123134 
 0.875159 0.882524 -0.149254 
 0.876433 0.882524 -0.160448 
 0.876433 0.883106 -0.201493 
 0.876433 0.883687 -0.227612 
 0.877707 0.883687 -0.227612 
 0.877707 0.884269 -0.268657 
 0.877707 0.884850 -0.291045 
 0.878981 0.884850 -0.276119 
 0.878981 0.885432 -0.302239 
 0.878981 0.886013 -0.309701 
 0.880255 0.886013 -0.276119 
 0.880255 0.886595 -0.279851 
 0.880255 0.887177 -0.283582 
 0.881529 0.887758 -0.250000 
 0.881529 0.888340 -0.257463 
 0.881529 0.888921 -0.264925 
 0.882803 0.888921 -0.231343 
 0.882803 0.889503 -0.238806 
 0.882803 0.890084 -0.242537 
 0.884076 0.890084 -0.212687 
 0.884076 0.890666 -0.208955 
 0.884076 0.891247 -0.201493 
 0.885350 0.891247 -0.179104 
 0.885350 0.891829 -0.156716 
 0.885350 0.892411 -0.130597 
 0.886624 0.892411 -0.126866 
 0.886624 0.892992 -0.119403 
 0.886624 0.893574 -0.126866 
 0.887898 0.893574 -0.149254 
 0.887898 0.894155 -0.171642 
 0.887898 0.894737 -0.190299 
 0.889172 0.894737 -0.216418 
 0.889172 0.895318 -0.235075 
 0.889172 0.895900 -0.246269 
 0.889172 0.896482 -0.279851 
 0.890446 0.896482 -0.291045 
 0.890446 0.897063 -0.320896 
 0.890446 0.897645 -0.373134 
 0.891720 0.897645 -0.388060 
 0.891720 0.898226 -0.417910 
 0.891720 0.898808 -0.447761 
 0.892994 0.898808 -0.473881 
 0.892994 0.899389 -0.500000 
 0.892994 0.899971 -0.522388 
 0.894268 0.899971 -0.526119 
 0.894268 0.900552 -0.559701 
 0.894268 0.901134 -0.578358 
 0.895541 0.901134 -0.578358 
 0.895541 0.901716 -0.608209 
 0.895541 0.902297 -0.623134 
 0.896815 0.902297 -0.626866 
 0.896815 0.902879 -0.641791 
 0.896815 0.903460 -0.656716 
 0.896815 0.904042 -0.675373 
 0.898089 0.904042 -0.675373 
 0.898089 0.904623 -0.682836 
 0.898089 0.905205 -0.694030 
 0.899363 0.905205 -0.694030 
 0.899363 0.905787 -0.697761 
 0.899363 0.906368 -0.705224 
 0.900637 0.906368 -0.701493 
 0.900637 0.906950 -0.705224 
 0.900637 0.907531 -0.712687 
 0.901911 0.907531 -0.712687 
 0.901911 0.908113 -0.716418 
 0.901911 0.908694 -0.720149 
 0.903185 0.908694 -0.716418 
 0.903185 0.909276 -0.723881 
 0.903185 0.909858 -0.723881 
 0.904459 0.909858 -0.723881 
 0.904459 0.910439 -0.727612 
 0.904459 0.911021 -0.727612 
 0.904459 0.911602 -0.723881 
 0.905732 0.911602 -0.723881 
 0.905732 0.912184 -0.723881 
 0.905732 0.912765 -0.720149 
 0.907006 0.912765 -0.720149 
 0.907006 0.913347 -0.720149 
 0.907006 0.913928 -0.720149 
 0.908280 0.913928 -0.720149 
 0.908280 0.914510 -0.701493 
 0.908280 0.915092 -0.664179 
 0.909554 0.915092 -0.667910 
 0.909554 0.915673 -0.645522 
 0.909554 0.916255 -0.623134 
 0.910828 0.916255 -0.634328 
 0.910828 0.916836 -0.626866 
 0.910828 0.917418 -0.619403 
 0.912102 0.917418 -0.641791 
 0.912102 0.917999 -0.634328 
 0.912102 0.918581 -0.630597 
 0.913376 0.919163 -0.641791 
 0.913376 0.919744 -0.630597 
 0.913376 0.920326 -0.600746 
 0.914650 0.920326 -0.630597 
 0.914650 0.920907 -0.623134 
 0.914650 0.921489 -0.634328 
 0.915924 0.921489 -0.664179 
 0.915924 0.922070 -0.667910 
 0.915924 0.922652 -0.652985 
 0.917197 0.922652 -0.660448 
 0.917197 0.923233 -0.645522 
 0.917197 0.923815 -0.615672 
 0.918471 0.923815 -0.645522 
 0.918471 0.924397 -0.630597 
 0.918471 0.924978 -0.615672 
 0.919745 0.924978 -0.641791 
 0.919745 0.925560 -0.630597 
 0.919745 0.926141 -0.623134 
 0.921019 0.926141 -0.641791 
 0.921019 0.926723 -0.634328 
 0.921019 0.927304 -0.630597 
 0.921019 0.927886 -0.638060 
 0.922293 0.927886 -0.656716 
 0.922293 0.928468 -0.649254 
 0.922293 0.929049 -0.634328 
 0.923567 0.929049 -0.652985 
 0.923567 0.929631 -0.641791 
 0.923567 0.930212 -0.626866 
 0.924841 0.930212 -0.645522 
 0.924841 0.930794 -0.638060 
 0.924841 0.931375 -0.638060 
 0.926115 0.931375 -0.645522 
 0.926115 0.931957 -0.634328 
 0.926115 0.932539 -0.611940 
 0.927389 0.932539 -0.626866 
 0.927389 0.933120 -0.623134 
 0.927389 0.933702 -0.615672 
 0.928662 0.933702 -0.641791 
 0.928662 0.934283 -0.634328 
 0.928662 0.934865 -0.619403 
 0.928662 0.935446 -0.604478 
 0.929936 0.935446 -0.623134 
 0.929936 0.936028 -0.600746 
 0.929936 0.936609 -0.585821 
 0.931210 0.936609 -0.608209 
 0.931210 0.937191 -0.604478 
 0.931210 0.937773 -0.611940 
 0.932484 0.937773 -0.626866 
 0.932484 0.938354 -0.638060 
 0.932484 0.938936 -0.634328 
 0.933758 0.938936 -0.641791 
 0.933758 0.939517 -0.641791 
 0.933758 0.940099 -0.638060 
 0.935032 0.940099 -0.634328 
 0.935032 0.940680 -0.626866 
 0.935032 0.941262 -0.623134 
 0.936306 0.941262 -0.615672 
 0.936306 0.941844 -0.615672 
 0.936306 0.942425 -0.608209 
 0.936306 0.943007 -0.604478 
 0.937580 0.943007 -0.597015 
 0.937580 0.943588 -0.597015 
 0.937580 0.944170 -0.604478 
 0.938854 0.944170 -0.593284 
 0.938854 0.944751 -0.585821 
 0.938854 0.945333 -0.585821 
 0.940127 0.945333 -0.585821 
 0.940127 0.945915 -0.585821 
 0.940127 0.946496 -0.582090 
 0.941401 0.946496 -0.582090 
 0.941401 0.947078 -0.574627 
 0.941401 0.947659 -0.555970 
 0.942675 0.947659 -0.552239 
 0.942675 0.948241 -0.537313 
 0.942675 0.948822 -0.511194 
 0.943949 0.948822 -0.507463 
 0.943949 0.949404 -0.485075 
 0.943949 0.949985 -0.444030 
 0.943949 0.950567 -0.414179 
 0.945223 0.950567 -0.399254 
 0.945223 0.951149 -0.373134 
 0.945223 0.951730 -0.361940 
 0.946497 0.951730 -0.343284 
 0.946497 0.952312 -0.335821 
 0.946497 0.952893 -0.335821 
 0.947771 0.952893 -0.313433 
 0.947771 0.953475 -0.317164 
 0.947771 0.954056 -0.320896 
 0.949045 0.954056 -0.294776 
 0.949045 0.954638 -0.291045 
 0.949045 0.955220 -0.276119 
 0.950318 0.955220 -0.253731 
 0.950318 0.955801 -0.242537 
 0.950318 0.956383 -0.220149 
 0.951592 0.956383 -0.194030 
 0.951592 0.956964 -0.179104 
 0.951592 0.957546 -0.149254 
 0.951592 0.958127 -0.126866 
 0.952866 0.958127 -0.115672 
 0.952866 0.958709 -0.100746 
 0.952866 0.959290 -0.089552 
 0.954140 0.959290 -0.082090 
 0.954140 0.959872 -0.063433 
 0.954140 0.960454 -0.055970 
 0.955414 0.960454 -0.048507 
 0.955414 0.961035 -0.029851 
 0.955414 0.961617 -0.022388 
 0.956688 0.961617 -0.014925 
 0.956688 0.962198 -0.003731 
 0.956688 0.962780 0.007463 
 0.957962 0.962780 0.011194 
 0.957962 0.963361 0.029851 
 0.957962 0.963943 0.033582 
 0.957962 0.964525 0.041045 
 0.959236 0.964525 0.037313 
 0.959236 0.965106 0.048507 
 0.959236 0.965688 0.063433 
 0.960510 0.965688 0.048507 
 0.960510 0.966269 0.067164 
 0.960510 0.966851 0.067164 
 0.961783 0.966851 0.067164 
 0.961783 0.967432 0.063433 
 0.961783 0.968014 0.052239 
 0.963057 0.968014 0.055970 
 0.963057 0.968596 0.033582 
 0.963057 0.969177 0.018657 
 0.964331 0.969177 0.022388 
 0.964331 0.969759 0.000000 
 0.964331 0.970340 -0.018657 
 0.965605 0.970340 -0.018657 
 0.965605 0.970922 -0.048507 
 0.965605 0.971503 -0.067164 
 0.965605 0.972085 -0.089552 
 0.966879 0.972085 -0.070896 
 0.966879 0.972666 -0.067164 
 0.966879 0.973248 -0.059701 
 0.968153 0.973248 -0.037313 
 0.968153 0.973830 -0.033582 
 0.968153 0.974411 -0.029851 
 0.969427 0.974411 -0.007463 
 0.969427 0.974993 0.000000 
 0.969427 0.975574 0.007463 
 0.970701 0.975574 0.026119 
 0.970701 0.976156 0.037313 
 0.970701 0.976737 0.044776 
 0.971975 0.976737 0.063433 
 0.971975 0.977319 0.074627 
 0.971975 0.977901 0.078358 
 0.971975 0.978482 0.067164 
 0.973248 0.978482 0.070896 
 0.973248 0.979064 0.059701 
 0.973248 0.979645 0.041045 
 0.974522 0.979645 0.044776 
 0.974522 0.980227 0.037313 
 0.974522 0.980808 0.033582 
 0.975796 0.980808 0.041045 
 0.975796 0.981390 0.041045 
 0.975796 0.981972 0.037313 
 0.977070 0.981972 0.048507 
 0.977070 0.982553 0.044776 
 0.977070 0.983135 0.037313 
 0.977070 0.983716 0.037313 
 0.978344 0.983716 0.041045 
 0.978344 0.984298 0.041045 
 0.978344 0.984879 0.029851 
 0.979618 0.984879 0.029851 
 0.979618 0.985461 0.026119 
 0.979618 0.986042 0.014925 
 0.980892 0.986042 -0.011194 
 0.980892 0.986624 -0.018657 
 0.980892 0.987206 -0.029851 
 0.980892 0.987787 -0.041045 
 0.982166 0.987787 -0.067164 
 0.982166 0.988369 -0.085821 
 0.982166 0.988950 -0.089552 
 0.983439 0.988950 -0.119403 
 0.983439 0.989532 -0.119403 
 0.983439 0.990113 -0.123134 
 0.984713 0.990113 -0.145522 
 0.984713 0.990695 -0.152985 
 0.984713 0.991277 -0.160448 
 0.984713 0.991858 -0.171642 
 0.985987 0.991858 -0.194030 
 
