# Supplementary material for: Terrain Referenced Navigation Using a Multilayer Radial Basis Function-Based Extreme Learning Machine
Source: Hindawi journal article supplement (doi:10.1155/2019/9142694), 2019-07-11
Supplement: f1 [file 9142694.f1.zip › 9142694_Supplementary information files/TRNSimulationOutput_180913/HeightComp.m]

clear all;
clc;

A = load('Bilinear_TerrainHeight.mat');
B = load('MRBF_ELM_TerrainHeight.mat');

figure(1)
plot(A.TrueT, A.AvgHei, '.'); hold on;
plot(B.TrueT, B.AvgHei, '.'); hold off;
grid on;
xlabel('Time [sec]')
ylabel('Height [m]');
legend('Bilinear', 'MRBF ELM');
